# Supplementary material for: Regulatory network analysis of Paneth cell and goblet cell enriched gut organoids using transcriptomics approaches
Source: Royal Society of Chemistry journal article supplement (doi:10.1039/c9mo00130a), 2019-12-10
Supplement: c9mo00130a1.cys [file c9mo00130a1.cys]

Archive with 131 entries (131 files):
- CytoscapeSession-2019_09_26-22_01/3.0.0.version
- CytoscapeSession-2019_09_26-22_01/networks/36-Pan_network_lfc1.txt.xgmml
- CytoscapeSession-2019_09_26-22_01/views/40205-40316-1%3A+Cluster+2+%28Score%3A+7.03%29.xgmml
- CytoscapeSession-2019_09_26-22_01/views/62-43285-Pan_network_lfc1.txt.xgmml
- CytoscapeSession-2019_09_26-22_01/views/40235-83410-1%3A+Cluster+3+%28Score%3A+6.145%29.xgmml
- CytoscapeSession-2019_09_26-22_01/views/40215-85665-1%3A+Cluster+4+%28Score%3A+4.235%29.xgmml
- CytoscapeSession-2019_09_26-22_01/views/40225-86545-1%3A+Cluster+5+%28Score%3A+2.667%29.xgmml
- CytoscapeSession-2019_09_26-22_01/views/40195-85721-1%3A+Cluster+1+%28Score%3A+17.048%29.xgmml
- CytoscapeSession-2019_09_26-22_01/tables/40215-1%3A+Cluster+4+%28Score%3A+4.235%29/LOCAL_ATTRS-org.cytoscape.model.CyNode-1%3A+Cluster+4+%28Score%3A+4.235%29+default+node.cytable
- CytoscapeSession-2019_09_26-22_01/tables/global/40261-52+hidden+node.cytable
- CytoscapeSession-2019_09_26-22_01/tables/40225-1%3A+Cluster+5+%28Score%3A+2.667%29/org.baderlab.autoannotate.cluster-org.cytoscape.model.CyNetwork-org.baderlab.autoannotate.cluster.cytable
- CytoscapeSession-2019_09_26-22_01/tables/40205-1%3A+Cluster+2+%28Score%3A+7.03%29/org.baderlab.autoannotate.annotationSet-org.cytoscape.model.CyNetwork-org.baderlab.autoannotate.annotationSet.cytable
- CytoscapeSession-2019_09_26-22_01/tables/40195-1%3A+Cluster+1+%28Score%3A+17.048%29/HIDDEN-org.cytoscape.model.CyNode-40195+hidden+node.cytable
- CytoscapeSession-2019_09_26-22_01/tables/40215-1%3A+Cluster+4+%28Score%3A+4.235%29/HIDDEN-org.cytoscape.model.CyNetwork-40215+hidden+network.cytable
- CytoscapeSession-2019_09_26-22_01/tables/62-Pan_network_lfc1.txt/org.baderlab.autoannotate.annotationSet-org.cytoscape.model.CyNetwork-org.baderlab.autoannotate.annotationSet.cytable
- CytoscapeSession-2019_09_26-22_01/tables/40205-1%3A+Cluster+2+%28Score%3A+7.03%29/LOCAL_ATTRS-org.cytoscape.model.CyNetwork-1%3A+Cluster+2+%28Score%3A+7.03%29+default+network.cytable
- CytoscapeSession-2019_09_26-22_01/tables/52-52/LOCAL_ATTRS-org.cytoscape.model.CyEdge-52+default+edge.cytable
- CytoscapeSession-2019_09_26-22_01/tables/40215-1%3A+Cluster+4+%28Score%3A+4.235%29/HIDDEN-org.cytoscape.model.CyEdge-40215+hidden+edge.cytable
- CytoscapeSession-2019_09_26-22_01/tables/40225-1%3A+Cluster+5+%28Score%3A+2.667%29/LOCAL_ATTRS-org.cytoscape.model.CyNetwork-1%3A+Cluster+5+%28Score%3A+2.667%29+default+network.cytable
- CytoscapeSession-2019_09_26-22_01/tables/36-Pan_network_lfc1.txt/LOCAL_ATTRS-org.cytoscape.model.CyEdge-36+default+edge.cytable
- CytoscapeSession-2019_09_26-22_01/tables/40225-1%3A+Cluster+5+%28Score%3A+2.667%29/HIDDEN-org.cytoscape.model.CyEdge-40225+hidden+edge.cytable
- CytoscapeSession-2019_09_26-22_01/tables/52-52/LOCAL_ATTRS-org.cytoscape.model.CyNetwork-52+default+network.cytable
- CytoscapeSession-2019_09_26-22_01/tables/global/40309-52+default+edge.cytable
- CytoscapeSession-2019_09_26-22_01/tables/52-52/HIDDEN-org.cytoscape.model.CyNetwork-52+hidden+network.cytable
- CytoscapeSession-2019_09_26-22_01/tables/global/40315-EnrichmentMap.View.1.cytable
- CytoscapeSession-2019_09_26-22_01/tables/40225-1%3A+Cluster+5+%28Score%3A+2.667%29/LOCAL_ATTRS-org.cytoscape.model.CyNode-1%3A+Cluster+5+%28Score%3A+2.667%29+default+node.cytable
- CytoscapeSession-2019_09_26-22_01/tables/global/40305-52+default+network.cytable
- CytoscapeSession-2019_09_26-22_01/tables/40195-1%3A+Cluster+1+%28Score%3A+17.048%29/LOCAL_ATTRS-org.cytoscape.model.CyNetwork-1%3A+Cluster+1+%28Score%3A+17.048%29+default+network.cytable
- CytoscapeSession-2019_09_26-22_01/tables/52-52/HIDDEN-org.cytoscape.model.CyEdge-52+hidden+edge.cytable
- CytoscapeSession-2019_09_26-22_01/tables/40225-1%3A+Cluster+5+%28Score%3A+2.667%29/LOCAL_ATTRS-org.cytoscape.model.CyEdge-1%3A+Cluster+5+%28Score%3A+2.667%29+default+edge.cytable
- CytoscapeSession-2019_09_26-22_01/tables/40195-1%3A+Cluster+1+%28Score%3A+17.048%29/LOCAL_ATTRS-org.cytoscape.model.CyNode-1%3A+Cluster+1+%28Score%3A+17.048%29+default+node.cytable
- CytoscapeSession-2019_09_26-22_01/tables/36-Pan_network_lfc1.txt/SHARED_ATTRS-org.cytoscape.model.CyEdge-36+shared+edge.cytable
- CytoscapeSession-2019_09_26-22_01/tables/36-Pan_network_lfc1.txt/SHARED_ATTRS-org.cytoscape.model.CyNetwork-36+shared+network.cytable
- CytoscapeSession-2019_09_26-22_01/tables/40215-1%3A+Cluster+4+%28Score%3A+4.235%29/LOCAL_ATTRS-org.cytoscape.model.CyEdge-1%3A+Cluster+4+%28Score%3A+4.235%29+default+edge.cytable
- CytoscapeSession-2019_09_26-22_01/tables/40205-1%3A+Cluster+2+%28Score%3A+7.03%29/LOCAL_ATTRS-org.cytoscape.model.CyNode-1%3A+Cluster+2+%28Score%3A+7.03%29+default+node.cytable
- CytoscapeSession-2019_09_26-22_01/tables/52-52/LOCAL_ATTRS-org.cytoscape.model.CyNode-52+default+node.cytable
- CytoscapeSession-2019_09_26-22_01/tables/40195-1%3A+Cluster+1+%28Score%3A+17.048%29/HIDDEN-org.cytoscape.model.CyNetwork-40195+hidden+network.cytable
- CytoscapeSession-2019_09_26-22_01/tables/40215-1%3A+Cluster+4+%28Score%3A+4.235%29/LOCAL_ATTRS-org.cytoscape.model.CyNetwork-1%3A+Cluster+4+%28Score%3A+4.235%29+default+network.cytable
- CytoscapeSession-2019_09_26-22_01/tables/40235-1%3A+Cluster+3+%28Score%3A+6.145%29/HIDDEN-org.cytoscape.model.CyEdge-40235+hidden+edge.cytable
- CytoscapeSession-2019_09_26-22_01/tables/global/40270-52+default+node.cytable
- CytoscapeSession-2019_09_26-22_01/tables/40225-1%3A+Cluster+5+%28Score%3A+2.667%29/HIDDEN-org.cytoscape.model.CyNetwork-40225+hidden+network.cytable
- CytoscapeSession-2019_09_26-22_01/tables/40215-1%3A+Cluster+4+%28Score%3A+4.235%29/org.baderlab.autoannotate.cluster-org.cytoscape.model.CyNetwork-org.baderlab.autoannotate.cluster.cytable
- CytoscapeSession-2019_09_26-22_01/tables/40195-1%3A+Cluster+1+%28Score%3A+17.048%29/org.baderlab.autoannotate.cluster-org.cytoscape.model.CyNetwork-org.baderlab.autoannotate.cluster.cytable
- CytoscapeSession-2019_09_26-22_01/tables/62-Pan_network_lfc1.txt/org.baderlab.autoannotate.cluster-org.cytoscape.model.CyNetwork-org.baderlab.autoannotate.cluster.cytable
- CytoscapeSession-2019_09_26-22_01/tables/40215-1%3A+Cluster+4+%28Score%3A+4.235%29/HIDDEN-org.cytoscape.model.CyNode-40215+hidden+node.cytable
- CytoscapeSession-2019_09_26-22_01/tables/40225-1%3A+Cluster+5+%28Score%3A+2.667%29/HIDDEN-org.cytoscape.model.CyNode-40225+hidden+node.cytable
- CytoscapeSession-2019_09_26-22_01/tables/36-Pan_network_lfc1.txt/HIDDEN-org.cytoscape.model.CyEdge-36+hidden+edge.cytable
- CytoscapeSession-2019_09_26-22_01/tables/40205-1%3A+Cluster+2+%28Score%3A+7.03%29/HIDDEN-org.cytoscape.model.CyNode-40205+hidden+node.cytable
- CytoscapeSession-2019_09_26-22_01/tables/global/40312-52+hidden+edge.cytable
- CytoscapeSession-2019_09_26-22_01/tables/40195-1%3A+Cluster+1+%28Score%3A+17.048%29/org.baderlab.autoannotate.annotationSet-org.cytoscape.model.CyNetwork-org.baderlab.autoannotate.annotationSet.cytable
- CytoscapeSession-2019_09_26-22_01/tables/62-Pan_network_lfc1.txt/LOCAL_ATTRS-org.cytoscape.model.CyEdge-Pan_network_lfc1.txt+default+edge.cytable
- CytoscapeSession-2019_09_26-22_01/tables/40235-1%3A+Cluster+3+%28Score%3A+6.145%29/org.baderlab.autoannotate.cluster-org.cytoscape.model.CyNetwork-org.baderlab.autoannotate.cluster.cytable
- CytoscapeSession-2019_09_26-22_01/tables/40235-1%3A+Cluster+3+%28Score%3A+6.145%29/HIDDEN-org.cytoscape.model.CyNetwork-40235+hidden+network.cytable
- CytoscapeSession-2019_09_26-22_01/tables/40205-1%3A+Cluster+2+%28Score%3A+7.03%29/HIDDEN-org.cytoscape.model.CyNetwork-40205+hidden+network.cytable
- CytoscapeSession-2019_09_26-22_01/tables/62-Pan_network_lfc1.txt/LOCAL_ATTRS-org.cytoscape.model.CyNetwork-Pan_network_lfc1.txt+default+network.cytable
- CytoscapeSession-2019_09_26-22_01/tables/40235-1%3A+Cluster+3+%28Score%3A+6.145%29/LOCAL_ATTRS-org.cytoscape.model.CyEdge-1%3A+Cluster+3+%28Score%3A+6.145%29+default+edge.cytable
- CytoscapeSession-2019_09_26-22_01/tables/62-Pan_network_lfc1.txt/HIDDEN-org.cytoscape.model.CyEdge-62+hidden+edge.cytable
- CytoscapeSession-2019_09_26-22_01/tables/40225-1%3A+Cluster+5+%28Score%3A+2.667%29/org.baderlab.autoannotate.annotationSet-org.cytoscape.model.CyNetwork-org.baderlab.autoannotate.annotationSet.cytable
- CytoscapeSession-2019_09_26-22_01/tables/36-Pan_network_lfc1.txt/LOCAL_ATTRS-org.cytoscape.model.CyNode-36+default+node.cytable
- CytoscapeSession-2019_09_26-22_01/tables/global/40313-52+hidden+network.cytable
- CytoscapeSession-2019_09_26-22_01/tables/40235-1%3A+Cluster+3+%28Score%3A+6.145%29/LOCAL_ATTRS-org.cytoscape.model.CyNode-1%3A+Cluster+3+%28Score%3A+6.145%29+default+node.cytable
- CytoscapeSession-2019_09_26-22_01/tables/40205-1%3A+Cluster+2+%28Score%3A+7.03%29/LOCAL_ATTRS-org.cytoscape.model.CyEdge-1%3A+Cluster+2+%28Score%3A+7.03%29+default+edge.cytable
- CytoscapeSession-2019_09_26-22_01/tables/62-Pan_network_lfc1.txt/HIDDEN-org.cytoscape.model.CyNode-62+hidden+node.cytable
- CytoscapeSession-2019_09_26-22_01/tables/62-Pan_network_lfc1.txt/LOCAL_ATTRS-org.cytoscape.model.CyNode-Pan_network_lfc1.txt+default+node.cytable
- CytoscapeSession-2019_09_26-22_01/tables/36-Pan_network_lfc1.txt/HIDDEN-org.cytoscape.model.CyNode-36+hidden+node.cytable
- CytoscapeSession-2019_09_26-22_01/tables/40205-1%3A+Cluster+2+%28Score%3A+7.03%29/org.baderlab.autoannotate.cluster-org.cytoscape.model.CyNetwork-org.baderlab.autoannotate.cluster.cytable
- CytoscapeSession-2019_09_26-22_01/tables/40235-1%3A+Cluster+3+%28Score%3A+6.145%29/org.baderlab.autoannotate.annotationSet-org.cytoscape.model.CyNetwork-org.baderlab.autoannotate.annotationSet.cytable
- CytoscapeSession-2019_09_26-22_01/tables/40235-1%3A+Cluster+3+%28Score%3A+6.145%29/LOCAL_ATTRS-org.cytoscape.model.CyNetwork-1%3A+Cluster+3+%28Score%3A+6.145%29+default+network.cytable
- CytoscapeSession-2019_09_26-22_01/tables/62-Pan_network_lfc1.txt/HIDDEN-org.cytoscape.model.CyNetwork-62+hidden+network.cytable
- CytoscapeSession-2019_09_26-22_01/tables/36-Pan_network_lfc1.txt/HIDDEN-org.cytoscape.model.CyNetwork-36+hidden+network.cytable
- CytoscapeSession-2019_09_26-22_01/tables/40205-1%3A+Cluster+2+%28Score%3A+7.03%29/HIDDEN-org.cytoscape.model.CyEdge-40205+hidden+edge.cytable
- CytoscapeSession-2019_09_26-22_01/tables/global/40289-EnrichmentMap.Model.1.cytable
- CytoscapeSession-2019_09_26-22_01/tables/40195-1%3A+Cluster+1+%28Score%3A+17.048%29/LOCAL_ATTRS-org.cytoscape.model.CyEdge-1%3A+Cluster+1+%28Score%3A+17.048%29+default+edge.cytable
- CytoscapeSession-2019_09_26-22_01/tables/52-52/HIDDEN-org.cytoscape.model.CyNode-52+hidden+node.cytable
- CytoscapeSession-2019_09_26-22_01/tables/40195-1%3A+Cluster+1+%28Score%3A+17.048%29/HIDDEN-org.cytoscape.model.CyEdge-40195+hidden+edge.cytable
- CytoscapeSession-2019_09_26-22_01/tables/36-Pan_network_lfc1.txt/LOCAL_ATTRS-org.cytoscape.model.CyNetwork-36+default+network.cytable
- CytoscapeSession-2019_09_26-22_01/tables/36-Pan_network_lfc1.txt/SHARED_ATTRS-org.cytoscape.model.CyNode-36+shared+node.cytable
- CytoscapeSession-2019_09_26-22_01/tables/40215-1%3A+Cluster+4+%28Score%3A+4.235%29/org.baderlab.autoannotate.annotationSet-org.cytoscape.model.CyNetwork-org.baderlab.autoannotate.annotationSet.cytable
- CytoscapeSession-2019_09_26-22_01/tables/40235-1%3A+Cluster+3+%28Score%3A+6.145%29/HIDDEN-org.cytoscape.model.CyNode-40235+hidden+node.cytable
- CytoscapeSession-2019_09_26-22_01/tables/cytables.xml
- CytoscapeSession-2019_09_26-22_01/session_vizmap.xml
- CytoscapeSession-2019_09_26-22_01/properties/session_bookmarks.xml
- CytoscapeSession-2019_09_26-22_01/properties/stringApp.props
- CytoscapeSession-2019_09_26-22_01/properties/org.genemania.props
- CytoscapeSession-2019_09_26-22_01/properties/groupSettings.props
- CytoscapeSession-2019_09_26-22_01/session_thumbnail.png
- CytoscapeSession-2019_09_26-22_01/apps/org.cytoscape.ding.customgraphicsmgr/image_metadata.props
- CytoscapeSession-2019_09_26-22_01/apps/org.cytoscape.ding.customgraphicsmgr/8.png
- CytoscapeSession-2019_09_26-22_01/apps/org.cytoscape.ding.customgraphicsmgr/9.png
- CytoscapeSession-2019_09_26-22_01/apps/org.cytoscape.ding.customgraphicsmgr/14.png
- CytoscapeSession-2019_09_26-22_01/apps/org.cytoscape.ding.customgraphicsmgr/28.png
- CytoscapeSession-2019_09_26-22_01/apps/org.cytoscape.ding.customgraphicsmgr/29.png
- CytoscapeSession-2019_09_26-22_01/apps/org.cytoscape.ding.customgraphicsmgr/15.png
- CytoscapeSession-2019_09_26-22_01/apps/org.cytoscape.ding.customgraphicsmgr/17.png
- CytoscapeSession-2019_09_26-22_01/apps/org.cytoscape.ding.customgraphicsmgr/16.png
- CytoscapeSession-2019_09_26-22_01/apps/org.cytoscape.ding.customgraphicsmgr/12.png
- CytoscapeSession-2019_09_26-22_01/apps/org.cytoscape.ding.customgraphicsmgr/13.png
- CytoscapeSession-2019_09_26-22_01/apps/org.cytoscape.ding.customgraphicsmgr/11.png
- CytoscapeSession-2019_09_26-22_01/apps/org.cytoscape.ding.customgraphicsmgr/10.png
- CytoscapeSession-2019_09_26-22_01/apps/org.cytoscape.ding.customgraphicsmgr/21.png
- CytoscapeSession-2019_09_26-22_01/apps/org.cytoscape.ding.customgraphicsmgr/20.png
- CytoscapeSession-2019_09_26-22_01/apps/org.cytoscape.ding.customgraphicsmgr/34.png
- CytoscapeSession-2019_09_26-22_01/apps/org.cytoscape.ding.customgraphicsmgr/22.png
- CytoscapeSession-2019_09_26-22_01/apps/org.cytoscape.ding.customgraphicsmgr/23.png
- CytoscapeSession-2019_09_26-22_01/apps/org.cytoscape.ding.customgraphicsmgr/27.png
- CytoscapeSession-2019_09_26-22_01/apps/org.cytoscape.ding.customgraphicsmgr/33.png
- CytoscapeSession-2019_09_26-22_01/apps/org.cytoscape.ding.customgraphicsmgr/32.png
- CytoscapeSession-2019_09_26-22_01/apps/org.cytoscape.ding.customgraphicsmgr/26.png
- CytoscapeSession-2019_09_26-22_01/apps/org.cytoscape.ding.customgraphicsmgr/18.png
- CytoscapeSession-2019_09_26-22_01/apps/org.cytoscape.ding.customgraphicsmgr/30.png
- CytoscapeSession-2019_09_26-22_01/apps/org.cytoscape.ding.customgraphicsmgr/24.png
- CytoscapeSession-2019_09_26-22_01/apps/org.cytoscape.ding.customgraphicsmgr/25.png
- CytoscapeSession-2019_09_26-22_01/apps/org.cytoscape.ding.customgraphicsmgr/31.png
- CytoscapeSession-2019_09_26-22_01/apps/org.cytoscape.ding.customgraphicsmgr/19.png
- CytoscapeSession-2019_09_26-22_01/apps/org.cytoscape.ding.customgraphicsmgr/4.png
- CytoscapeSession-2019_09_26-22_01/apps/org.cytoscape.ding.customgraphicsmgr/42.png
- CytoscapeSession-2019_09_26-22_01/apps/org.cytoscape.ding.customgraphicsmgr/43.png
- CytoscapeSession-2019_09_26-22_01/apps/org.cytoscape.ding.customgraphicsmgr/5.png
- CytoscapeSession-2019_09_26-22_01/apps/org.cytoscape.ding.customgraphicsmgr/7.png
- CytoscapeSession-2019_09_26-22_01/apps/org.cytoscape.ding.customgraphicsmgr/6.png
- CytoscapeSession-2019_09_26-22_01/apps/org.cytoscape.ding.customgraphicsmgr/2.png
- CytoscapeSession-2019_09_26-22_01/apps/org.cytoscape.ding.customgraphicsmgr/3.png
- CytoscapeSession-2019_09_26-22_01/apps/org.cytoscape.ding.customgraphicsmgr/1.png
- CytoscapeSession-2019_09_26-22_01/apps/org.cytoscape.swing-application/session_state.xml
- CytoscapeSession-2019_09_26-22_01/apps/org.cytoscape.swing-application/network_list.xml
- CytoscapeSession-2019_09_26-22_01/apps/org.cytoscape.filter/filters.json
- CytoscapeSession-2019_09_26-22_01/apps/org.cytoscape.filter/filterChains.json
- CytoscapeSession-2019_09_26-22_01/apps/org.cytoscape.browser/UnassignedTables.props
- CytoscapeSession-2019_09_26-22_01/apps/org.cytoscape.browser/NetworkTable.props
- CytoscapeSession-2019_09_26-22_01/apps/org.cytoscape.browser/EdgeTable.props
- CytoscapeSession-2019_09_26-22_01/apps/org.cytoscape.browser/NodeTable.props
