# Supplementary material for: Regulatory network analysis of Paneth cell and goblet cell enriched gut organoids using transcriptomics approaches
Source: Royal Society of Chemistry journal article supplement (doi:10.1039/c9mo00130a), 2019-12-10
Supplement: c9mo00130a1.cys [file c9mo00130a1.cys › CytoscapeSession-2019_09_26-22_01/apps/org.cytoscape.browser/EdgeTable.props]

1: Cluster 4 (Score: 4.235) default edge	0	SUID	false
1: Cluster 4 (Score: 4.235) default edge	1	selected	false
1: Cluster 4 (Score: 4.235) default edge	2	shared name	true
1: Cluster 4 (Score: 4.235) default edge	3	shared interaction	true
1: Cluster 4 (Score: 4.235) default edge	4	name	true
1: Cluster 4 (Score: 4.235) default edge	5	interaction	true
1: Cluster 4 (Score: 4.235) default edge	6	isInPath	true
1: Cluster 4 (Score: 4.235) default edge	7	Module_Edge_Color	true
