# Supplementary material for: Regulatory network analysis of Paneth cell and goblet cell enriched gut organoids using transcriptomics approaches
Source: Royal Society of Chemistry journal article supplement (doi:10.1039/c9mo00130a), 2019-12-10
Supplement: c9mo00130a1.cys [file c9mo00130a1.cys › CytoscapeSession-2019_09_26-22_01/apps/org.cytoscape.browser/NetworkTable.props]

1: Cluster 4 (Score: 4.235) default network	0	SUID	false
1: Cluster 4 (Score: 4.235) default network	1	selected	false
1: Cluster 4 (Score: 4.235) default network	2	shared name	true
1: Cluster 4 (Score: 4.235) default network	3	name	true
1: Cluster 4 (Score: 4.235) default network	4	__Annotations	true
