# Supplementary material for: Regulatory network analysis of Paneth cell and goblet cell enriched gut organoids using transcriptomics approaches
Source: Royal Society of Chemistry journal article supplement (doi:10.1039/c9mo00130a), 2019-12-10
Supplement: c9mo00130a1.cys [file c9mo00130a1.cys › CytoscapeSession-2019_09_26-22_01/apps/org.cytoscape.browser/NodeTable.props]

1: Cluster 4 (Score: 4.235) default node	0	SUID	false
1: Cluster 4 (Score: 4.235) default node	1	selected	false
1: Cluster 4 (Score: 4.235) default node	2	shared name	true
1: Cluster 4 (Score: 4.235) default node	3	name	true
1: Cluster 4 (Score: 4.235) default node	4	Chea3_Library	true
1: Cluster 4 (Score: 4.235) default node	5	Chea3_Overlapping_Genes	true
1: Cluster 4 (Score: 4.235) default node	6	Chea3_Rank	true
1: Cluster 4 (Score: 4.235) default node	7	chea3_Score	true
1: Cluster 4 (Score: 4.235) default node	8	genesymbol	true
1: Cluster 4 (Score: 4.235) default node	9	isExcludedFromPaths	true
1: Cluster 4 (Score: 4.235) default node	10	isInPath	true
1: Cluster 4 (Score: 4.235) default node	11	Module_Color	true
1: Cluster 4 (Score: 4.235) default node	12	MCODE_Cluster	true
1: Cluster 4 (Score: 4.235) default node	13	MCODE_Node_Status	true
1: Cluster 4 (Score: 4.235) default node	14	MCODE_Score	true
