# Supplementary material for: Regulatory network analysis of Paneth cell and goblet cell enriched gut organoids using transcriptomics approaches
Source: Royal Society of Chemistry journal article supplement (doi:10.1039/c9mo00130a), 2019-12-10
Supplement: c9mo00130a1.cys [file c9mo00130a1.cys › CytoscapeSession-2019_09_26-22_01/apps/org.cytoscape.filter/filterChains.json]

[ {
  "name" : "Default chain",
  "transformers" : [ ]
} ]
