# Supplementary material for: Regulatory network analysis of Paneth cell and goblet cell enriched gut organoids using transcriptomics approaches
Source: Royal Society of Chemistry journal article supplement (doi:10.1039/c9mo00130a), 2019-12-10
Supplement: c9mo00130a1.cys [file c9mo00130a1.cys › CytoscapeSession-2019_09_26-22_01/networks/36-Pan_network_lfc1.txt.xgmml]

<?xml version="1.0" encoding="UTF-8" standalone="yes"?>
<graph id="36" label="Pan_network_lfc1.txt" cy:view="0" cy:registered="0" cy:documentVersion="3.0" xmlns:dc="http://purl.org/dc/elements/1.1/" xmlns:xlink="http://www.w3.org/1999/xlink" xmlns:rdf="http://www.w3.org/1999/02/22-rdf-syntax-ns#" xmlns:cy="http://www.cytoscape.org" xmlns="http://www.cs.rpi.edu/XGMML">
  <att>
    <graph id="52" label="52" cy:registered="0">
    </graph>
  </att>
  <att>
    <graph id="62" label="Pan_network_lfc1.txt" cy:registered="1">
      <node id="3132" label="ENSMUSG00000078570"/>
      <node id="3131" label="ENSMUSG00000052229"/>
      <node id="3130" label="ENSMUSG00000047238"/>
      <node id="3129" label="ENSMUSG00000044927"/>
      <node id="3128" label="ENSMUSG00000044365"/>
      <node id="3127" label="ENSMUSG00000039485"/>
      <node id="3126" label="ENSMUSG00000036533"/>
      <node id="3125" label="ENSMUSG00000031202"/>
      <node id="3124" label="ENSMUSG00000020848"/>
      <node id="3123" label="ENSMUSG00000018698"/>
      <node id="3122" label="ENSMUSG00000064367"/>
      <node id="3121" label="ENSMUSG00000064370"/>
      <node id="3120" label="ENSMUSG00000028463"/>
      <node id="3119" label="ENSMUSG00000021373"/>
      <node id="3118" label="ENSMUSG00000005968"/>
      <node id="3117" label="ENSMUSG00000021620"/>
      <node id="3116" label="ENSMUSG00000032135"/>
      <node id="3115" label="ENSMUSG00000033715"/>
      <node id="3114" label="ENSMUSG00000080316"/>
      <node id="3113" label="mmu-miR-221-5p"/>
      <node id="3112" label="ENSMUSG00000044068"/>
      <node id="3111" label="ENSMUSG00000038545"/>
      <node id="3110" label="ENSMUSG00000034875"/>
      <node id="3109" label="ENSMUSG00000092060"/>
      <node id="3108" label="ENSMUSG00000025574"/>
      <node id="3107" label="ENSMUSG00000057315"/>
      <node id="3106" label="ENSMUSG00000032557"/>
      <node id="3105" label="ENSMUSG00000029445"/>
      <node id="3104" label="ENSMUSG00000028137"/>
      <node id="3103" label="ENSMUSG00000024558"/>
      <node id="3102" label="ENSMUSG00000022540"/>
      <node id="3101" label="ENSMUSG00000019852"/>
      <node id="3100" label="ENSMUSG00000020818"/>
      <node id="3099" label="ENSMUSG00000030946"/>
      <node id="3098" label="ENSMUSG00000038793"/>
      <node id="3097" label="ENSMUSG00000006281"/>
      <node id="3096" label="ENSMUSG00000094595"/>
      <node id="3095" label="ENSMUSG00000090213"/>
      <node id="3094" label="ENSMUSG00000071177"/>
      <node id="3093" label="ENSMUSG00000096727"/>
      <node id="3092" label="ENSMUSG00000090150"/>
      <node id="3091" label="ENSMUSG00000055137"/>
      <node id="3090" label="ENSMUSG00000051811"/>
      <node id="3089" label="ENSMUSG00000041954"/>
      <node id="3088" label="ENSMUSG00000030793"/>
      <node id="3087" label="ENSMUSG00000030731"/>
      <node id="3086" label="ENSMUSG00000026614"/>
      <node id="3085" label="ENSMUSG00000027359"/>
      <node id="3084" label="ENSMUSG00000027999"/>
      <node id="3083" label="ENSMUSG00000090622"/>
      <node id="3082" label="ENSMUSG00000066595"/>
      <node id="3081" label="ENSMUSG00000027858"/>
      <node id="3080" label="ENSMUSG00000029314"/>
      <node id="3079" label="ENSMUSG00000027314"/>
      <node id="3078" label="mmu-miR-92a-1-5p"/>
      <node id="3077" label="ENSMUSG00000050106"/>
      <node id="3076" label="ENSMUSG00000044966"/>
      <node id="3075" label="ENSMUSG00000040703"/>
      <node id="3074" label="ENSMUSG00000026039"/>
      <node id="3073" label="ENSMUSG00000021765"/>
      <node id="3072" label="ENSMUSG00000036427"/>
      <node id="3071" label="ENSMUSG00000042828"/>
      <node id="3070" label="ENSMUSG00000041189"/>
      <node id="3069" label="ENSMUSG00000035769"/>
      <node id="3068" label="ENSMUSG00000033174"/>
      <node id="3067" label="ENSMUSG00000021993"/>
      <node id="3066" label="ENSMUSG00000022091"/>
      <node id="3065" label="ENSMUSG00000019179"/>
      <node id="3064" label="ENSMUSG00000025980"/>
      <node id="3063" label="ENSMUSG00000040412"/>
      <node id="3062" label="mmu-miR-344-3p"/>
      <node id="3061" label="ENSMUSG00000057963"/>
      <node id="3060" label="ENSMUSG00000045316"/>
      <node id="3059" label="ENSMUSG00000040204"/>
      <node id="3058" label="ENSMUSG00000029859"/>
      <node id="3057" label="ENSMUSG00000029090"/>
      <node id="3056" label="ENSMUSG00000026017"/>
      <node id="3055" label="ENSMUSG00000026873"/>
      <node id="3054" label="ENSMUSG00000025486"/>
      <node id="3053" label="ENSMUSG00000029708"/>
      <node id="3052" label="ENSMUSG00000025366"/>
      <node id="3051" label="ENSMUSG00000000168"/>
      <node id="3050" label="ENSMUSG00000056812"/>
      <node id="3049" label="ENSMUSG00000031762"/>
      <node id="3048" label="mmu-miR-153-3p"/>
      <node id="3047" label="ENSMUSG00000050212"/>
      <node id="3046" label="ENSMUSG00000030934"/>
      <node id="3045" label="ENSMUSG00000029403"/>
      <node id="3044" label="ENSMUSG00000026199"/>
      <node id="3043" label="ENSMUSG00000020773"/>
      <node id="3042" label="ENSMUSG00000001323"/>
      <node id="3041" label="ENSMUSG00000000058"/>
      <node id="3040" label="ENSMUSG00000044906"/>
      <node id="3039" label="ENSMUSG00000026618"/>
      <node id="3038" label="ENSMUSG00000020646"/>
      <node id="3037" label="mmu-miR-375-3p"/>
      <node id="3036" label="ENSMUSG00000065979"/>
      <node id="3035" label="ENSMUSG00000045775"/>
      <node id="3034" label="ENSMUSG00000050914"/>
      <node id="3033" label="ENSMUSG00000038507"/>
      <node id="3032" label="ENSMUSG00000038298"/>
      <node id="3031" label="ENSMUSG00000034614"/>
      <node id="3030" label="ENSMUSG00000030737"/>
      <node id="3029" label="ENSMUSG00000030972"/>
      <node id="3028" label="ENSMUSG00000028976"/>
      <node id="3027" label="ENSMUSG00000030867"/>
      <node id="3026" label="ENSMUSG00000031503"/>
      <node id="3025" label="ENSMUSG00000025271"/>
      <node id="3024" label="ENSMUSG00000048922"/>
      <node id="3023" label="ENSMUSG00000026198"/>
      <node id="3022" label="ENSMUSG00000021069"/>
      <node id="3021" label="ENSMUSG00000032204"/>
      <node id="3020" label="ENSMUSG00000032038"/>
      <node id="3019" label="ENSMUSG00000016495"/>
      <node id="3018" label="ENSMUSG00000048489"/>
      <node id="3017" label="ENSMUSG00000037474"/>
      <node id="3016" label="ENSMUSG00000033985"/>
      <node id="3015" label="ENSMUSG00000031838"/>
      <node id="3014" label="ENSMUSG00000024580"/>
      <node id="3013" label="ENSMUSG00000021950"/>
      <node id="3012" label="ENSMUSG00000022159"/>
      <node id="3011" label="ENSMUSG00000021306"/>
      <node id="3010" label="ENSMUSG00000056938"/>
      <node id="3009" label="ENSMUSG00000049303"/>
      <node id="3008" label="ENSMUSG00000038224"/>
      <node id="3007" label="ENSMUSG00000032997"/>
      <node id="3006" label="ENSMUSG00000031749"/>
      <node id="3005" label="ENSMUSG00000026797"/>
      <node id="3004" label="ENSMUSG00000005514"/>
      <node id="3003" label="ENSMUSG00000011382"/>
      <node id="3002" label="ENSMUSG00000000901"/>
      <node id="3001" label="ENSMUSG00000044783"/>
      <node id="3000" label="mmu-miR-1981-5p"/>
      <node id="2999" label="ENSMUSG00000070304"/>
      <node id="2998" label="ENSMUSG00000058706"/>
      <node id="2997" label="ENSMUSG00000063160"/>
      <node id="2996" label="ENSMUSG00000059791"/>
      <node id="2995" label="ENSMUSG00000054027"/>
      <node id="2994" label="ENSMUSG00000054434"/>
      <node id="2993" label="ENSMUSG00000045062"/>
      <node id="2992" label="ENSMUSG00000048327"/>
      <node id="2991" label="ENSMUSG00000048807"/>
      <node id="2990" label="ENSMUSG00000046743"/>
      <node id="2989" label="ENSMUSG00000040699"/>
      <node id="2988" label="ENSMUSG00000037239"/>
      <node id="2987" label="ENSMUSG00000036902"/>
      <node id="2986" label="ENSMUSG00000034220"/>
      <node id="2985" label="ENSMUSG00000033149"/>
      <node id="2984" label="ENSMUSG00000032374"/>
      <node id="2983" label="ENSMUSG00000030161"/>
      <node id="2982" label="ENSMUSG00000031482"/>
      <node id="2981" label="ENSMUSG00000029392"/>
      <node id="2980" label="ENSMUSG00000029669"/>
      <node id="2979" label="ENSMUSG00000029033"/>
      <node id="2978" label="ENSMUSG00000029455"/>
      <node id="2977" label="ENSMUSG00000026622"/>
      <node id="2976" label="ENSMUSG00000026796"/>
      <node id="2975" label="ENSMUSG00000024654"/>
      <node id="2974" label="ENSMUSG00000020101"/>
      <node id="2973" label="ENSMUSG00000020882"/>
      <node id="2972" label="ENSMUSG00000006273"/>
      <node id="2971" label="ENSMUSG00000015599"/>
      <node id="2970" label="ENSMUSG00000003518"/>
      <node id="2969" label="ENSMUSG00000002475"/>
      <node id="2968" label="ENSMUSG00000068923"/>
      <node id="2967" label="ENSMUSG00000089774"/>
      <node id="2966" label="ENSMUSG00000059213"/>
      <node id="2965" label="ENSMUSG00000048218"/>
      <node id="2964" label="ENSMUSG00000044562"/>
      <node id="2963" label="ENSMUSG00000043670"/>
      <node id="2962" label="ENSMUSG00000040505"/>
      <node id="2961" label="ENSMUSG00000038065"/>
      <node id="2960" label="ENSMUSG00000036295"/>
      <node id="2959" label="ENSMUSG00000035459"/>
      <node id="2958" label="ENSMUSG00000035365"/>
      <node id="2957" label="ENSMUSG00000034522"/>
      <node id="2956" label="ENSMUSG00000032936"/>
      <node id="2955" label="ENSMUSG00000031748"/>
      <node id="2954" label="ENSMUSG00000030695"/>
      <node id="2953" label="ENSMUSG00000030088"/>
      <node id="2952" label="ENSMUSG00000031502"/>
      <node id="2951" label="ENSMUSG00000030428"/>
      <node id="2950" label="ENSMUSG00000028698"/>
      <node id="2949" label="ENSMUSG00000027983"/>
      <node id="2948" label="ENSMUSG00000028737"/>
      <node id="2947" label="ENSMUSG00000028655"/>
      <node id="2946" label="ENSMUSG00000026825"/>
      <node id="2945" label="ENSMUSG00000026811"/>
      <node id="2944" label="ENSMUSG00000027712"/>
      <node id="2943" label="ENSMUSG00000027605"/>
      <node id="2942" label="ENSMUSG00000026193"/>
      <node id="2941" label="ENSMUSG00000025738"/>
      <node id="2940" label="ENSMUSG00000022837"/>
      <node id="2939" label="ENSMUSG00000023019"/>
      <node id="2938" label="ENSMUSG00000020723"/>
      <node id="2937" label="ENSMUSG00000021066"/>
      <node id="2936" label="ENSMUSG00000021062"/>
      <node id="2935" label="ENSMUSG00000020258"/>
      <node id="2934" label="ENSMUSG00000020120"/>
      <node id="2933" label="ENSMUSG00000009394"/>
      <node id="2932" label="ENSMUSG00000004961"/>
      <node id="2931" label="mmu-miR-298-5p"/>
      <node id="2930" label="ENSMUSG00000090019"/>
      <node id="2929" label="ENSMUSG00000052727"/>
      <node id="2928" label="ENSMUSG00000048012"/>
      <node id="2927" label="ENSMUSG00000043192"/>
      <node id="2926" label="ENSMUSG00000046387"/>
      <node id="2925" label="ENSMUSG00000041298"/>
      <node id="2924" label="ENSMUSG00000038248"/>
      <node id="2923" label="ENSMUSG00000034563"/>
      <node id="2922" label="ENSMUSG00000031782"/>
      <node id="2921" label="ENSMUSG00000031561"/>
      <node id="2920" label="ENSMUSG00000031824"/>
      <node id="2919" label="ENSMUSG00000029192"/>
      <node id="2918" label="ENSMUSG00000025465"/>
      <node id="2917" label="ENSMUSG00000025791"/>
      <node id="2916" label="ENSMUSG00000025484"/>
      <node id="2915" label="ENSMUSG00000024350"/>
      <node id="2914" label="ENSMUSG00000021262"/>
      <node id="2913" label="ENSMUSG00000013593"/>
      <node id="2912" label="ENSMUSG00000015837"/>
      <node id="2911" label="ENSMUSG00000001248"/>
      <node id="2910" label="ENSMUSG00000002578"/>
      <node id="2909" label="ENSMUSG00000063889"/>
      <node id="2908" label="ENSMUSG00000044060"/>
      <node id="2907" label="ENSMUSG00000034640"/>
      <node id="2906" label="ENSMUSG00000037818"/>
      <node id="2905" label="ENSMUSG00000041920"/>
      <node id="2904" label="ENSMUSG00000038893"/>
      <node id="2903" label="ENSMUSG00000027306"/>
      <node id="2902" label="ENSMUSG00000021577"/>
      <node id="2901" label="ENSMUSG00000020330"/>
      <node id="2900" label="ENSMUSG00000054723"/>
      <node id="2899" label="ENSMUSG00000041220"/>
      <node id="2898" label="ENSMUSG00000032633"/>
      <node id="2897" label="ENSMUSG00000029201"/>
      <node id="2896" label="ENSMUSG00000027761"/>
      <node id="2895" label="ENSMUSG00000022043"/>
      <node id="2894" label="ENSMUSG00000020044"/>
      <node id="2893" label="ENSMUSG00000059554"/>
      <node id="2892" label="ENSMUSG00000057193"/>
      <node id="2891" label="ENSMUSG00000064210"/>
      <node id="2890" label="ENSMUSG00000061689"/>
      <node id="2889" label="ENSMUSG00000051323"/>
      <node id="2888" label="ENSMUSG00000051236"/>
      <node id="2887" label="ENSMUSG00000046179"/>
      <node id="2886" label="ENSMUSG00000045005"/>
      <node id="2885" label="ENSMUSG00000043313"/>
      <node id="2884" label="ENSMUSG00000043496"/>
      <node id="2883" label="ENSMUSG00000041642"/>
      <node id="2882" label="ENSMUSG00000041966"/>
      <node id="2881" label="ENSMUSG00000041741"/>
      <node id="2880" label="ENSMUSG00000040653"/>
      <node id="2879" label="ENSMUSG00000038332"/>
      <node id="2878" label="ENSMUSG00000039116"/>
      <node id="2877" label="ENSMUSG00000037822"/>
      <node id="2876" label="ENSMUSG00000038412"/>
      <node id="2875" label="ENSMUSG00000038121"/>
      <node id="2874" label="ENSMUSG00000036106"/>
      <node id="2873" label="ENSMUSG00000036473"/>
      <node id="2872" label="ENSMUSG00000035274"/>
      <node id="2871" label="ENSMUSG00000034111"/>
      <node id="2870" label="ENSMUSG00000030790"/>
      <node id="2869" label="ENSMUSG00000031557"/>
      <node id="2868" label="ENSMUSG00000031442"/>
      <node id="2867" label="ENSMUSG00000030207"/>
      <node id="2866" label="ENSMUSG00000027822"/>
      <node id="2865" label="ENSMUSG00000026437"/>
      <node id="2864" label="ENSMUSG00000023036"/>
      <node id="2863" label="ENSMUSG00000022244"/>
      <node id="2862" label="ENSMUSG00000023030"/>
      <node id="2861" label="ENSMUSG00000021215"/>
      <node id="2860" label="ENSMUSG00000020312"/>
      <node id="2859" label="ENSMUSG00000019883"/>
      <node id="2858" label="ENSMUSG00000018199"/>
      <node id="2857" label="ENSMUSG00000014905"/>
      <node id="2856" label="ENSMUSG00000003865"/>
      <node id="2855" label="ENSMUSG00000042148"/>
      <node id="2854" label="ENSMUSG00000070056"/>
      <node id="2853" label="ENSMUSG00000021884"/>
      <node id="2852" label="ENSMUSG00000022419"/>
      <node id="2851" label="ENSMUSG00000048482"/>
      <node id="2850" label="ENSMUSG00000050965"/>
      <node id="2849" label="ENSMUSG00000047910"/>
      <node id="2848" label="ENSMUSG00000042851"/>
      <node id="2847" label="ENSMUSG00000035954"/>
      <node id="2846" label="ENSMUSG00000033416"/>
      <node id="2845" label="ENSMUSG00000022358"/>
      <node id="2844" label="ENSMUSG00000013076"/>
      <node id="2843" label="mmu-miR-350-5p"/>
      <node id="2842" label="mmu-miR-31-3p"/>
      <node id="2841" label="mmu-miR-30b-5p"/>
      <node id="2840" label="mmu-miR-129-5p"/>
      <node id="2839" label="ENSMUSG00000075511"/>
      <node id="2838" label="mmu-miR-27a-3p"/>
      <node id="2837" label="mmu-miR-152-3p"/>
      <node id="2836" label="ENSMUSG00000097131"/>
      <node id="2835" label="mmu-miR-205-5p"/>
      <node id="2834" label="mmu-miR-99a-5p"/>
      <node id="2833" label="mmu-miR-218-5p"/>
      <node id="2832" label="mmu-miR-29a-3p"/>
      <node id="2831" label="mmu-miR-29c-3p"/>
      <node id="2830" label="mmu-miR-101a-3p"/>
      <node id="2829" label="mmu-miR-92b-3p"/>
      <node id="2828" label="mmu-let-7e-5p"/>
      <node id="2827" label="ENSMUSG00000086782"/>
      <node id="2826" label="mmu-miR-125b-5p"/>
      <node id="2825" label="mmu-miR-195a-5p"/>
      <node id="2824" label="mmu-miR-140-5p"/>
      <node id="2823" label="ENSMUSG00000097006"/>
      <node id="2822" label="mmu-miR-20b-5p"/>
      <node id="2821" label="mmu-miR-15b-5p"/>
      <node id="2820" label="mmu-miR-872-5p"/>
      <node id="2819" label="mmu-miR-194-5p"/>
      <node id="2818" label="mmu-miR-18a-3p"/>
      <node id="2817" label="mmu-miR-708-5p"/>
      <node id="2816" label="mmu-miR-10a-5p"/>
      <node id="2815" label="mmu-miR-125a-3p"/>
      <node id="2814" label="mmu-miR-200a-3p"/>
      <node id="2813" label="mmu-miR-708-3p"/>
      <node id="2812" label="mmu-miR-146a-5p"/>
      <node id="2811" label="mmu-miR-574-3p"/>
      <node id="2810" label="mmu-miR-101a-5p"/>
      <node id="2809" label="mmu-miR-421-3p"/>
      <node id="2808" label="mmu-miR-210-3p"/>
      <node id="2807" label="mmu-miR-222-5p"/>
      <node id="2806" label="mmu-miR-24-2-5p"/>
      <node id="2805" label="mmu-miR-19b-3p"/>
      <node id="2804" label="ENSMUSG00000100017"/>
      <node id="2803" label="mmu-miR-125b-2-3p"/>
      <node id="2802" label="mmu-miR-677-5p"/>
      <node id="2801" label="mmu-miR-24-3p"/>
      <node id="2800" label="mmu-miR-7b-5p"/>
      <node id="2799" label="mmu-miR-340-5p"/>
      <node id="2798" label="mmu-miR-215-5p"/>
      <node id="2797" label="mmu-miR-184-3p"/>
      <node id="2796" label="mmu-miR-330-5p"/>
      <node id="2795" label="mmu-miR-362-3p"/>
      <node id="2794" label="mmu-miR-204-5p"/>
      <node id="2793" label="mmu-miR-148a-3p"/>
      <node id="2792" label="mmu-miR-342-3p"/>
      <node id="2791" label="ENSMUSG00000097493"/>
      <node id="2790" label="mmu-miR-33-5p"/>
      <node id="2789" label="ENSMUSG00000006638"/>
      <node id="2788" label="ENSMUSG00000085037"/>
      <node id="2787" label="mmu-miR-7a-5p"/>
      <node id="2786" label="mmu-miR-378b"/>
      <node id="2785" label="ENSMUSG00000097048"/>
      <node id="2784" label="mmu-miR-29b-3p"/>
      <node id="2783" label="ENSMUSG00000099474"/>
      <node id="2782" label="mmu-miR-181c-5p"/>
      <node id="2781" label="mmu-miR-92a-3p"/>
      <node id="2780" label="mmu-miR-15a-5p"/>
      <node id="2779" label="mmu-miR-143-3p"/>
      <node id="2778" label="mmu-miR-351-5p"/>
      <node id="2777" label="mmu-miR-141-3p"/>
      <node id="2776" label="mmu-miR-33-3p"/>
      <node id="2775" label="ENSMUSG00000079414"/>
      <node id="2774" label="mmu-miR-23a-3p"/>
      <node id="2773" label="mmu-miR-99b-5p"/>
      <node id="2772" label="mmu-miR-132-3p"/>
      <node id="2771" label="mmu-miR-146b-5p"/>
      <node id="2770" label="ENSMUSG00000106847"/>
      <node id="2769" label="mmu-miR-497a-5p"/>
      <node id="2768" label="ENSMUSG00000070392"/>
      <node id="2767" label="ENSMUSG00000052125"/>
      <node id="2766" label="mmu-miR-19a-3p"/>
      <node id="2765" label="mmu-miR-151-3p"/>
      <node id="2764" label="ENSMUSG00000097354"/>
      <node id="2763" label="mmu-miR-32-5p"/>
      <node id="2762" label="ENSMUSG00000099519"/>
      <node id="2761" label="ENSMUSG00000096944"/>
      <node id="2760" label="ENSMUSG00000087594"/>
      <node id="2759" label="mmu-miR-222-3p"/>
      <node id="2758" label="mmu-miR-99b-3p"/>
      <node id="2757" label="ENSMUSG00000064043"/>
      <node id="2756" label="ENSMUSG00000092274"/>
      <node id="2755" label="ENSMUSG00000101609"/>
      <node id="2754" label="ENSMUSG00000087574"/>
      <node id="2753" label="ENSMUSG00000090086"/>
      <node id="2752" label="ENSMUSG00000092183"/>
      <node id="2751" label="ENSMUSG00000043993"/>
      <node id="2750" label="mmu-miR-29a-5p"/>
      <node id="2749" label="ENSMUSG00000072694"/>
      <node id="2748" label="mmu-miR-1945"/>
      <node id="2747" label="mmu-miR-378d"/>
      <node id="2746" label="mmu-miR-101c"/>
      <node id="2745" label="ENSMUSG00000106634"/>
      <node id="2744" label="ENSMUSG00000097673"/>
      <node id="2743" label="ENSMUSG00000073147"/>
      <node id="2742" label="ENSMUSG00000105957"/>
      <node id="2741" label="ENSMUSG00000044522"/>
      <node id="2740" label="ENSMUSG00000085329"/>
      <node id="2739" label="ENSMUSG00000097514"/>
      <node id="2738" label="ENSMUSG00000087179"/>
      <node id="2737" label="ENSMUSG00000086141"/>
      <node id="2736" label="ENSMUSG00000087196"/>
      <node id="2735" label="ENSMUSG00000097785"/>
      <node id="2734" label="ENSMUSG00000097632"/>
      <node id="2733" label="ENSMUSG00000075010"/>
      <node id="2732" label="ENSMUSG00000102106"/>
      <node id="2731" label="ENSMUSG00000102123"/>
      <node id="2730" label="ENSMUSG00000085024"/>
      <node id="2729" label="ENSMUSG00000097519"/>
      <node id="2728" label="ENSMUSG00000100975"/>
      <node id="2727" label="ENSMUSG00000111857"/>
      <node id="2726" label="ENSMUSG00000111202"/>
      <node id="2725" label="ENSMUSG00000111528"/>
      <node id="2724" label="ENSMUSG00000110755"/>
      <node id="2723" label="ENSMUSG00000099025"/>
      <node id="2722" label="ENSMUSG00000110697"/>
      <node id="2721" label="ENSMUSG00000109084"/>
      <node id="2720" label="ENSMUSG00000038917"/>
      <node id="2719" label="ENSMUSG00000108961"/>
      <node id="2718" label="ENSMUSG00000097415"/>
      <node id="2717" label="ENSMUSG00000099843"/>
      <node id="2716" label="ENSMUSG00000097842"/>
      <node id="2715" label="ENSMUSG00000107879"/>
      <node id="2714" label="ENSMUSG00000107689"/>
      <node id="2713" label="ENSMUSG00000097797"/>
      <node id="2712" label="ENSMUSG00000110276"/>
      <node id="2711" label="ENSMUSG00000108356"/>
      <node id="2710" label="ENSMUSG00000106547"/>
      <node id="2709" label="ENSMUSG00000097184"/>
      <node id="2708" label="ENSMUSG00000097039"/>
      <node id="2707" label="ENSMUSG00000097284"/>
      <node id="2706" label="ENSMUSG00000097310"/>
      <node id="2705" label="ENSMUSG00000097932"/>
      <node id="2704" label="ENSMUSG00000097059"/>
      <node id="2703" label="ENSMUSG00000038152"/>
      <node id="2702" label="ENSMUSG00000097709"/>
      <node id="2701" label="ENSMUSG00000029878"/>
      <node id="2700" label="ENSMUSG00000085126"/>
      <node id="2699" label="ENSMUSG00000102917"/>
      <node id="2698" label="ENSMUSG00000103067"/>
      <node id="2697" label="ENSMUSG00000097277"/>
      <node id="2696" label="ENSMUSG00000111731"/>
      <node id="2695" label="ENSMUSG00000097287"/>
      <node id="2694" label="ENSMUSG00000097908"/>
      <node id="2693" label="ENSMUSG00000097561"/>
      <node id="2692" label="ENSMUSG00000103043"/>
      <node id="2691" label="ENSMUSG00000097088"/>
      <node id="2690" label="ENSMUSG00000086320"/>
      <node id="2689" label="ENSMUSG00000085183"/>
      <node id="2688" label="ENSMUSG00000085180"/>
      <node id="2687" label="ENSMUSG00000105146"/>
      <node id="2686" label="ENSMUSG00000097281"/>
      <node id="2685" label="ENSMUSG00000104011"/>
      <node id="2684" label="ENSMUSG00000085017"/>
      <node id="2683" label="ENSMUSG00000097727"/>
      <node id="2682" label="ENSMUSG00000051331"/>
      <node id="2681" label="ENSMUSG00000062175"/>
      <node id="2680" label="ENSMUSG00000066456"/>
      <node id="2679" label="ENSMUSG00000046794"/>
      <node id="2678" label="ENSMUSG00000039899"/>
      <node id="2677" label="ENSMUSG00000032898"/>
      <node id="2676" label="ENSMUSG00000028687"/>
      <node id="2675" label="ENSMUSG00000022055"/>
      <node id="2674" label="ENSMUSG00000051235"/>
      <node id="2673" label="ENSMUSG00000036918"/>
      <node id="2672" label="ENSMUSG00000081058"/>
      <node id="2671" label="ENSMUSG00000049791"/>
      <node id="2670" label="ENSMUSG00000045763"/>
      <node id="2669" label="ENSMUSG00000039428"/>
      <node id="2668" label="ENSMUSG00000038253"/>
      <node id="2667" label="ENSMUSG00000037279"/>
      <node id="2666" label="ENSMUSG00000005125"/>
      <node id="2665" label="ENSMUSG00000074444"/>
      <node id="2664" label="ENSMUSG00000056004"/>
      <node id="2663" label="ENSMUSG00000019917"/>
      <node id="2662" label="ENSMUSG00000058076"/>
      <node id="2661" label="ENSMUSG00000038280"/>
      <node id="2660" label="ENSMUSG00000031831"/>
      <node id="2659" label="ENSMUSG00000095930"/>
      <node id="2658" label="ENSMUSG00000074437"/>
      <node id="2657" label="ENSMUSG00000074359"/>
      <node id="2656" label="ENSMUSG00000066621"/>
      <node id="2655" label="ENSMUSG00000056698"/>
      <node id="2654" label="ENSMUSG00000044024"/>
      <node id="2653" label="ENSMUSG00000041301"/>
      <node id="2652" label="ENSMUSG00000040687"/>
      <node id="2651" label="ENSMUSG00000038252"/>
      <node id="2650" label="ENSMUSG00000037126"/>
      <node id="2649" label="ENSMUSG00000030786"/>
      <node id="2648" label="ENSMUSG00000026235"/>
      <node id="2647" label="ENSMUSG00000025243"/>
      <node id="2646" label="ENSMUSG00000023456"/>
      <node id="2645" label="ENSMUSG00000050473"/>
      <node id="2644" label="ENSMUSG00000044453"/>
      <node id="2643" label="ENSMUSG00000032034"/>
      <node id="2642" label="ENSMUSG00000013338"/>
      <node id="2641" label="ENSMUSG00000051735"/>
      <node id="2640" label="ENSMUSG00000047193"/>
      <node id="2639" label="ENSMUSG00000042743"/>
      <node id="2638" label="ENSMUSG00000042524"/>
      <node id="2637" label="ENSMUSG00000040121"/>
      <node id="2636" label="ENSMUSG00000025888"/>
      <node id="2635" label="ENSMUSG00000024736"/>
      <node id="2634" label="ENSMUSG00000019864"/>
      <node id="2633" label="ENSMUSG00000031391"/>
      <node id="2632" label="ENSMUSG00000058435"/>
      <node id="2631" label="ENSMUSG00000045064"/>
      <node id="2630" label="ENSMUSG00000033200"/>
      <node id="2629" label="ENSMUSG00000019429"/>
      <node id="2628" label="ENSMUSG00000056553"/>
      <node id="2627" label="ENSMUSG00000028179"/>
      <node id="2626" label="ENSMUSG00000021697"/>
      <node id="2625" label="ENSMUSG00000030103"/>
      <node id="2624" label="ENSMUSG00000027452"/>
      <node id="2623" label="ENSMUSG00000057789"/>
      <node id="2622" label="ENSMUSG00000031770"/>
      <node id="2621" label="ENSMUSG00000028466"/>
      <node id="2620" label="ENSMUSG00000050556"/>
      <node id="2619" label="ENSMUSG00000054115"/>
      <node id="2618" label="ENSMUSG00000001348"/>
      <node id="2617" label="ENSMUSG00000034701"/>
      <node id="2616" label="ENSMUSG00000027434"/>
      <node id="2615" label="ENSMUSG00000039239"/>
      <node id="2614" label="ENSMUSG00000032060"/>
      <node id="2613" label="ENSMUSG00000031073"/>
      <node id="2612" label="ENSMUSG00000002633"/>
      <node id="2611" label="ENSMUSG00000021253"/>
      <node id="2610" label="ENSMUSG00000078350"/>
      <node id="2609" label="ENSMUSG00000037979"/>
      <node id="2608" label="ENSMUSG00000036768"/>
      <node id="2607" label="ENSMUSG00000013160"/>
      <node id="2606" label="ENSMUSG00000028108"/>
      <node id="2605" label="ENSMUSG00000073293"/>
      <node id="2604" label="ENSMUSG00000071113"/>
      <node id="2603" label="ENSMUSG00000068551"/>
      <node id="2602" label="ENSMUSG00000066357"/>
      <node id="2601" label="ENSMUSG00000064213"/>
      <node id="2600" label="ENSMUSG00000060508"/>
      <node id="2599" label="ENSMUSG00000051262"/>
      <node id="2598" label="ENSMUSG00000050982"/>
      <node id="2597" label="ENSMUSG00000042328"/>
      <node id="2596" label="ENSMUSG00000037390"/>
      <node id="2595" label="ENSMUSG00000037259"/>
      <node id="2594" label="ENSMUSG00000035697"/>
      <node id="2593" label="ENSMUSG00000031372"/>
      <node id="2592" label="ENSMUSG00000031099"/>
      <node id="2591" label="ENSMUSG00000029716"/>
      <node id="2590" label="ENSMUSG00000029503"/>
      <node id="2589" label="ENSMUSG00000027581"/>
      <node id="2588" label="ENSMUSG00000027331"/>
      <node id="2587" label="ENSMUSG00000026958"/>
      <node id="2586" label="ENSMUSG00000024939"/>
      <node id="2585" label="ENSMUSG00000024308"/>
      <node id="2584" label="ENSMUSG00000023191"/>
      <node id="2583" label="ENSMUSG00000021265"/>
      <node id="2582" label="ENSMUSG00000020493"/>
      <node id="2581" label="ENSMUSG00000020140"/>
      <node id="2580" label="ENSMUSG00000010911"/>
      <node id="2579" label="ENSMUSG00000003955"/>
      <node id="2578" label="ENSMUSG00000000037"/>
      <node id="2577" label="ENSMUSG00000023781"/>
      <node id="2576" label="ENSMUSG00000042834"/>
      <node id="2575" label="ENSMUSG00000026737"/>
      <node id="2574" label="ENSMUSG00000108931"/>
      <node id="2573" label="ENSMUSG00000096717"/>
      <node id="2572" label="ENSMUSG00000093901"/>
      <node id="2571" label="ENSMUSG00000079516"/>
      <node id="2570" label="ENSMUSG00000068341"/>
      <node id="2569" label="ENSMUSG00000062591"/>
      <node id="2568" label="ENSMUSG00000060208"/>
      <node id="2567" label="ENSMUSG00000054662"/>
      <node id="2566" label="ENSMUSG00000053852"/>
      <node id="2565" label="ENSMUSG00000052616"/>
      <node id="2564" label="ENSMUSG00000051951"/>
      <node id="2563" label="ENSMUSG00000034463"/>
      <node id="2562" label="ENSMUSG00000032181"/>
      <node id="2561" label="ENSMUSG00000032086"/>
      <node id="2560" label="ENSMUSG00000031090"/>
      <node id="2559" label="ENSMUSG00000029821"/>
      <node id="2558" label="ENSMUSG00000028262"/>
      <node id="2557" label="ENSMUSG00000024270"/>
      <node id="2556" label="ENSMUSG00000019467"/>
      <node id="2555" label="ENSMUSG00000017723"/>
      <node id="2554" label="ENSMUSG00000006179"/>
      <node id="2553" label="ENSMUSG00000002010"/>
      <node id="2552" label="ENSMUSG00000000632"/>
      <node id="2551" label="ENSMUSG00000071648"/>
      <node id="2550" label="ENSMUSG00000071178"/>
      <node id="2549" label="ENSMUSG00000068686"/>
      <node id="2548" label="ENSMUSG00000061825"/>
      <node id="2547" label="ENSMUSG00000056666"/>
      <node id="2546" label="ENSMUSG00000040146"/>
      <node id="2545" label="ENSMUSG00000037216"/>
      <node id="2544" label="ENSMUSG00000032489"/>
      <node id="2543" label="ENSMUSG00000030884"/>
      <node id="2542" label="ENSMUSG00000027947"/>
      <node id="2541" label="ENSMUSG00000024526"/>
      <node id="2540" label="ENSMUSG00000020072"/>
      <node id="2539" label="ENSMUSG00000018012"/>
      <node id="2538" label="ENSMUSG00000048583"/>
      <node id="2537" label="ENSMUSG00000024381"/>
      <node id="2536" label="ENSMUSG00000064158"/>
      <node id="2535" label="ENSMUSG00000036242"/>
      <node id="2534" label="ENSMUSG00000025268"/>
      <node id="2533" label="ENSMUSG00000024215"/>
      <node id="2532" label="ENSMUSG00000021379"/>
      <node id="2531" label="ENSMUSG00000094786"/>
      <node id="2530" label="ENSMUSG00000091705"/>
      <node id="2529" label="ENSMUSG00000079180"/>
      <node id="2528" label="ENSMUSG00000079092"/>
      <node id="2527" label="ENSMUSG00000069792"/>
      <node id="2526" label="ENSMUSG00000067724"/>
      <node id="2525" label="ENSMUSG00000067571"/>
      <node id="2524" label="ENSMUSG00000063239"/>
      <node id="2523" label="ENSMUSG00000062444"/>
      <node id="2522" label="ENSMUSG00000061762"/>
      <node id="2521" label="ENSMUSG00000060621"/>
      <node id="2520" label="ENSMUSG00000052271"/>
      <node id="2519" label="ENSMUSG00000051341"/>
      <node id="2518" label="ENSMUSG00000050821"/>
      <node id="2517" label="ENSMUSG00000050192"/>
      <node id="2516" label="ENSMUSG00000048200"/>
      <node id="2515" label="ENSMUSG00000047394"/>
      <node id="2514" label="ENSMUSG00000046432"/>
      <node id="2513" label="ENSMUSG00000046262"/>
      <node id="2512" label="ENSMUSG00000041992"/>
      <node id="2511" label="ENSMUSG00000040714"/>
      <node id="2510" label="ENSMUSG00000040666"/>
      <node id="2509" label="ENSMUSG00000038838"/>
      <node id="2508" label="ENSMUSG00000038209"/>
      <node id="2507" label="ENSMUSG00000037196"/>
      <node id="2506" label="ENSMUSG00000035200"/>
      <node id="2505" label="ENSMUSG00000034677"/>
      <node id="2504" label="ENSMUSG00000032105"/>
      <node id="2503" label="ENSMUSG00000031732"/>
      <node id="2502" label="ENSMUSG00000031349"/>
      <node id="2501" label="ENSMUSG00000031227"/>
      <node id="2500" label="ENSMUSG00000031163"/>
      <node id="2499" label="ENSMUSG00000030866"/>
      <node id="2498" label="ENSMUSG00000030278"/>
      <node id="2497" label="ENSMUSG00000029575"/>
      <node id="2496" label="ENSMUSG00000027496"/>
      <node id="2495" label="ENSMUSG00000027223"/>
      <node id="2494" label="ENSMUSG00000026828"/>
      <node id="2493" label="ENSMUSG00000026617"/>
      <node id="2492" label="ENSMUSG00000024084"/>
      <node id="2491" label="ENSMUSG00000022661"/>
      <node id="2490" label="ENSMUSG00000022176"/>
      <node id="2489" label="ENSMUSG00000021070"/>
      <node id="2488" label="ENSMUSG00000020886"/>
      <node id="2487" label="ENSMUSG00000020651"/>
      <node id="2486" label="ENSMUSG00000020154"/>
      <node id="2485" label="ENSMUSG00000018574"/>
      <node id="2484" label="ENSMUSG00000018470"/>
      <node id="2483" label="ENSMUSG00000017390"/>
      <node id="2482" label="ENSMUSG00000010307"/>
      <node id="2481" label="ENSMUSG00000007783"/>
      <node id="2480" label="ENSMUSG00000006711"/>
      <node id="2479" label="ENSMUSG00000006360"/>
      <node id="2478" label="ENSMUSG00000006356"/>
      <node id="2477" label="ENSMUSG00000003452"/>
      <node id="2476" label="ENSMUSG00000003199"/>
      <node id="2475" label="ENSMUSG00000000202"/>
      <node id="2474" label="ENSMUSG00000073043"/>
      <node id="2473" label="ENSMUSG00000093805"/>
      <node id="2472" label="ENSMUSG00000040231"/>
      <node id="2471" label="ENSMUSG00000040035"/>
      <node id="2470" label="ENSMUSG00000033029"/>
      <node id="2469" label="ENSMUSG00000055197"/>
      <node id="2468" label="ENSMUSG00000036764"/>
      <node id="2467" label="ENSMUSG00000024253"/>
      <node id="2466" label="ENSMUSG00000019878"/>
      <node id="2465" label="ENSMUSG00000075602"/>
      <node id="2464" label="ENSMUSG00000074785"/>
      <node id="2463" label="ENSMUSG00000057596"/>
      <node id="2462" label="ENSMUSG00000045827"/>
      <node id="2461" label="ENSMUSG00000043705"/>
      <node id="2460" label="ENSMUSG00000034855"/>
      <node id="2459" label="ENSMUSG00000034349"/>
      <node id="2458" label="ENSMUSG00000032839"/>
      <node id="2457" label="ENSMUSG00000032661"/>
      <node id="2456" label="ENSMUSG00000032114"/>
      <node id="2455" label="ENSMUSG00000028057"/>
      <node id="2454" label="ENSMUSG00000026657"/>
      <node id="2453" label="ENSMUSG00000024401"/>
      <node id="2452" label="ENSMUSG00000079339"/>
      <node id="2451" label="ENSMUSG00000070390"/>
      <node id="2450" label="ENSMUSG00000048752"/>
      <node id="2449" label="ENSMUSG00000002668"/>
      <node id="2448" label="ENSMUSG00000047996"/>
      <node id="2447" label="ENSMUSG00000031337"/>
      <node id="2446" label="ENSMUSG00000029865"/>
      <node id="2445" label="ENSMUSG00000028860"/>
      <node id="2444" label="ENSMUSG00000027805"/>
      <node id="2443" label="ENSMUSG00000021403"/>
      <node id="2442" label="ENSMUSG00000001128"/>
      <node id="2441" label="ENSMUSG00000090700"/>
      <node id="2440" label="ENSMUSG00000078963"/>
      <node id="2439" label="ENSMUSG00000078672"/>
      <node id="2438" label="ENSMUSG00000074445"/>
      <node id="2437" label="ENSMUSG00000070704"/>
      <node id="2436" label="ENSMUSG00000053746"/>
      <node id="2435" label="ENSMUSG00000046811"/>
      <node id="2434" label="ENSMUSG00000035429"/>
      <node id="2433" label="ENSMUSG00000032080"/>
      <node id="2432" label="ENSMUSG00000030382"/>
      <node id="2431" label="ENSMUSG00000029334"/>
      <node id="2430" label="ENSMUSG00000028403"/>
      <node id="2429" label="ENSMUSG00000028337"/>
      <node id="2428" label="ENSMUSG00000026149"/>
      <node id="2427" label="ENSMUSG00000025528"/>
      <node id="2426" label="ENSMUSG00000024731"/>
      <node id="2425" label="ENSMUSG00000023966"/>
      <node id="2424" label="ENSMUSG00000020150"/>
      <node id="2423" label="ENSMUSG00000006651"/>
      <node id="2422" label="ENSMUSG00000004347"/>
      <node id="2421" label="ENSMUSG00000000204"/>
      <node id="2420" label="ENSMUSG00000018623"/>
      <node id="2419" label="ENSMUSG00000111709"/>
      <node id="2418" label="ENSMUSG00000110573"/>
      <node id="2417" label="ENSMUSG00000110469"/>
      <node id="2416" label="ENSMUSG00000110206"/>
      <node id="2415" label="ENSMUSG00000109946"/>
      <node id="2414" label="ENSMUSG00000103421"/>
      <node id="2413" label="ENSMUSG00000101605"/>
      <node id="2412" label="ENSMUSG00000098715"/>
      <node id="2411" label="ENSMUSG00000097148"/>
      <node id="2410" label="ENSMUSG00000096146"/>
      <node id="2409" label="ENSMUSG00000096054"/>
      <node id="2408" label="ENSMUSG00000096001"/>
      <node id="2407" label="ENSMUSG00000094858"/>
      <node id="2406" label="ENSMUSG00000094840"/>
      <node id="2405" label="ENSMUSG00000094690"/>
      <node id="2404" label="ENSMUSG00000094584"/>
      <node id="2403" label="ENSMUSG00000094559"/>
      <node id="2402" label="ENSMUSG00000094219"/>
      <node id="2401" label="ENSMUSG00000092618"/>
      <node id="2400" label="ENSMUSG00000092486"/>
      <node id="2399" label="ENSMUSG00000092083"/>
      <node id="2398" label="ENSMUSG00000091813"/>
      <node id="2397" label="ENSMUSG00000091721"/>
      <node id="2396" label="ENSMUSG00000090891"/>
      <node id="2395" label="ENSMUSG00000090877"/>
      <node id="2394" label="ENSMUSG00000089901"/>
      <node id="2393" label="ENSMUSG00000089715"/>
      <node id="2392" label="ENSMUSG00000085957"/>
      <node id="2391" label="ENSMUSG00000085683"/>
      <node id="2390" label="ENSMUSG00000085007"/>
      <node id="2389" label="ENSMUSG00000083282"/>
      <node id="2388" label="ENSMUSG00000079722"/>
      <node id="2387" label="ENSMUSG00000079659"/>
      <node id="2386" label="ENSMUSG00000079507"/>
      <node id="2385" label="ENSMUSG00000079494"/>
      <node id="2384" label="ENSMUSG00000079471"/>
      <node id="2383" label="ENSMUSG00000079440"/>
      <node id="2382" label="ENSMUSG00000079396"/>
      <node id="2381" label="ENSMUSG00000079057"/>
      <node id="2380" label="ENSMUSG00000079056"/>
      <node id="2379" label="ENSMUSG00000079038"/>
      <node id="2378" label="ENSMUSG00000079015"/>
      <node id="2377" label="ENSMUSG00000078964"/>
      <node id="2376" label="ENSMUSG00000078949"/>
      <node id="2375" label="ENSMUSG00000078776"/>
      <node id="2374" label="ENSMUSG00000078695"/>
      <node id="2373" label="ENSMUSG00000078566"/>
      <node id="2372" label="ENSMUSG00000078515"/>
      <node id="2371" label="ENSMUSG00000078502"/>
      <node id="2370" label="ENSMUSG00000078453"/>
      <node id="2369" label="ENSMUSG00000078439"/>
      <node id="2368" label="ENSMUSG00000078349"/>
      <node id="2367" label="ENSMUSG00000078234"/>
      <node id="2366" label="ENSMUSG00000076435"/>
      <node id="2365" label="ENSMUSG00000075702"/>
      <node id="2364" label="ENSMUSG00000075610"/>
      <node id="2363" label="ENSMUSG00000075543"/>
      <node id="2362" label="ENSMUSG00000075304"/>
      <node id="2361" label="ENSMUSG00000075289"/>
      <node id="2360" label="ENSMUSG00000075229"/>
      <node id="2359" label="ENSMUSG00000075033"/>
      <node id="2358" label="ENSMUSG00000074968"/>
      <node id="2357" label="ENSMUSG00000074896"/>
      <node id="2356" label="ENSMUSG00000074802"/>
      <node id="2355" label="ENSMUSG00000074796"/>
      <node id="2354" label="ENSMUSG00000074715"/>
      <node id="2353" label="ENSMUSG00000074653"/>
      <node id="2352" label="ENSMUSG00000074652"/>
      <node id="2351" label="ENSMUSG00000074639"/>
      <node id="2350" label="ENSMUSG00000074628"/>
      <node id="2349" label="ENSMUSG00000074447"/>
      <node id="2348" label="ENSMUSG00000074435"/>
      <node id="2347" label="ENSMUSG00000074364"/>
      <node id="2346" label="ENSMUSG00000074261"/>
      <node id="2345" label="ENSMUSG00000074259"/>
      <node id="2344" label="ENSMUSG00000074218"/>
      <node id="2343" label="ENSMUSG00000074217"/>
      <node id="2342" label="ENSMUSG00000074207"/>
      <node id="2341" label="ENSMUSG00000074195"/>
      <node id="2340" label="ENSMUSG00000074179"/>
      <node id="2339" label="ENSMUSG00000073973"/>
      <node id="2338" label="ENSMUSG00000073888"/>
      <node id="2337" label="ENSMUSG00000073802"/>
      <node id="2336" label="ENSMUSG00000073768"/>
      <node id="2335" label="ENSMUSG00000073680"/>
      <node id="2334" label="ENSMUSG00000073609"/>
      <node id="2333" label="ENSMUSG00000073481"/>
      <node id="2332" label="ENSMUSG00000073424"/>
      <node id="2331" label="ENSMUSG00000073409"/>
      <node id="2330" label="ENSMUSG00000073399"/>
      <node id="2329" label="ENSMUSG00000073207"/>
      <node id="2328" label="ENSMUSG00000072875"/>
      <node id="2327" label="ENSMUSG00000072849"/>
      <node id="2326" label="ENSMUSG00000072294"/>
      <node id="2325" label="ENSMUSG00000071723"/>
      <node id="2324" label="ENSMUSG00000071719"/>
      <node id="2323" label="ENSMUSG00000071636"/>
      <node id="2322" label="ENSMUSG00000071042"/>
      <node id="2321" label="ENSMUSG00000070855"/>
      <node id="2320" label="ENSMUSG00000070823"/>
      <node id="2319" label="ENSMUSG00000070803"/>
      <node id="2318" label="ENSMUSG00000070661"/>
      <node id="2317" label="ENSMUSG00000070577"/>
      <node id="2316" label="ENSMUSG00000070366"/>
      <node id="2315" label="ENSMUSG00000070337"/>
      <node id="2314" label="ENSMUSG00000070332"/>
      <node id="2313" label="ENSMUSG00000070044"/>
      <node id="2312" label="ENSMUSG00000069805"/>
      <node id="2311" label="ENSMUSG00000069456"/>
      <node id="2310" label="ENSMUSG00000069227"/>
      <node id="2309" label="ENSMUSG00000068959"/>
      <node id="2308" label="ENSMUSG00000068877"/>
      <node id="2307" label="ENSMUSG00000068874"/>
      <node id="2306" label="ENSMUSG00000068587"/>
      <node id="2305" label="ENSMUSG00000068323"/>
      <node id="2304" label="ENSMUSG00000068299"/>
      <node id="2303" label="ENSMUSG00000068246"/>
      <node id="2302" label="ENSMUSG00000068154"/>
      <node id="2301" label="ENSMUSG00000068101"/>
      <node id="2300" label="ENSMUSG00000067889"/>
      <node id="2299" label="ENSMUSG00000067818"/>
      <node id="2298" label="ENSMUSG00000067714"/>
      <node id="2297" label="ENSMUSG00000067377"/>
      <node id="2296" label="ENSMUSG00000067235"/>
      <node id="2295" label="ENSMUSG00000067231"/>
      <node id="2294" label="ENSMUSG00000067229"/>
      <node id="2293" label="ENSMUSG00000066800"/>
      <node id="2292" label="ENSMUSG00000066643"/>
      <node id="2291" label="ENSMUSG00000066441"/>
      <node id="2290" label="ENSMUSG00000066366"/>
      <node id="2289" label="ENSMUSG00000066278"/>
      <node id="2288" label="ENSMUSG00000066191"/>
      <node id="2287" label="ENSMUSG00000066152"/>
      <node id="2286" label="ENSMUSG00000066090"/>
      <node id="2285" label="ENSMUSG00000064373"/>
      <node id="2284" label="ENSMUSG00000064272"/>
      <node id="2283" label="ENSMUSG00000064267"/>
      <node id="2282" label="ENSMUSG00000064225"/>
      <node id="2281" label="ENSMUSG00000064177"/>
      <node id="2280" label="ENSMUSG00000064165"/>
      <node id="2279" label="ENSMUSG00000064140"/>
      <node id="2278" label="ENSMUSG00000064125"/>
      <node id="2277" label="ENSMUSG00000064080"/>
      <node id="2276" label="ENSMUSG00000064036"/>
      <node id="2275" label="ENSMUSG00000063851"/>
      <node id="2274" label="ENSMUSG00000063704"/>
      <node id="2273" label="ENSMUSG00000063568"/>
      <node id="2272" label="ENSMUSG00000063142"/>
      <node id="2271" label="ENSMUSG00000063011"/>
      <node id="2270" label="ENSMUSG00000062995"/>
      <node id="2269" label="ENSMUSG00000062826"/>
      <node id="2268" label="ENSMUSG00000062753"/>
      <node id="2267" label="ENSMUSG00000062638"/>
      <node id="2266" label="ENSMUSG00000062480"/>
      <node id="2265" label="ENSMUSG00000062312"/>
      <node id="2264" label="ENSMUSG00000062064"/>
      <node id="2263" label="ENSMUSG00000062007"/>
      <node id="2262" label="ENSMUSG00000061959"/>
      <node id="2261" label="ENSMUSG00000061838"/>
      <node id="2260" label="ENSMUSG00000061758"/>
      <node id="2259" label="ENSMUSG00000061740"/>
      <node id="2258" label="ENSMUSG00000061601"/>
      <node id="2257" label="ENSMUSG00000061462"/>
      <node id="2256" label="ENSMUSG00000061414"/>
      <node id="2255" label="ENSMUSG00000061171"/>
      <node id="2254" label="ENSMUSG00000060961"/>
      <node id="2253" label="ENSMUSG00000060703"/>
      <node id="2252" label="ENSMUSG00000060671"/>
      <node id="2251" label="ENSMUSG00000060615"/>
      <node id="2250" label="ENSMUSG00000060613"/>
      <node id="2249" label="ENSMUSG00000060550"/>
      <node id="2248" label="ENSMUSG00000060548"/>
      <node id="2247" label="ENSMUSG00000060429"/>
      <node id="2246" label="ENSMUSG00000060224"/>
      <node id="2245" label="ENSMUSG00000059900"/>
      <node id="2244" label="ENSMUSG00000059895"/>
      <node id="2243" label="ENSMUSG00000059713"/>
      <node id="2242" label="ENSMUSG00000059668"/>
      <node id="2241" label="ENSMUSG00000059654"/>
      <node id="2240" label="ENSMUSG00000059406"/>
      <node id="2239" label="ENSMUSG00000059149"/>
      <node id="2238" label="ENSMUSG00000059060"/>
      <node id="2237" label="ENSMUSG00000058952"/>
      <node id="2236" label="ENSMUSG00000058794"/>
      <node id="2235" label="ENSMUSG00000058656"/>
      <node id="2234" label="ENSMUSG00000058586"/>
      <node id="2233" label="ENSMUSG00000058260"/>
      <node id="2232" label="ENSMUSG00000058216"/>
      <node id="2231" label="ENSMUSG00000058063"/>
      <node id="2230" label="ENSMUSG00000057897"/>
      <node id="2229" label="ENSMUSG00000057880"/>
      <node id="2228" label="ENSMUSG00000057716"/>
      <node id="2227" label="ENSMUSG00000057706"/>
      <node id="2226" label="ENSMUSG00000057666"/>
      <node id="2225" label="ENSMUSG00000057614"/>
      <node id="2224" label="ENSMUSG00000057400"/>
      <node id="2223" label="ENSMUSG00000057346"/>
      <node id="2222" label="ENSMUSG00000057229"/>
      <node id="2221" label="ENSMUSG00000057182"/>
      <node id="2220" label="ENSMUSG00000057176"/>
      <node id="2219" label="ENSMUSG00000057074"/>
      <node id="2218" label="ENSMUSG00000056973"/>
      <node id="2217" label="ENSMUSG00000056888"/>
      <node id="2216" label="ENSMUSG00000056758"/>
      <node id="2215" label="ENSMUSG00000056724"/>
      <node id="2214" label="ENSMUSG00000056671"/>
      <node id="2213" label="ENSMUSG00000056648"/>
      <node id="2212" label="ENSMUSG00000056592"/>
      <node id="2211" label="ENSMUSG00000056492"/>
      <node id="2210" label="ENSMUSG00000056457"/>
      <node id="2209" label="ENSMUSG00000056413"/>
      <node id="2208" label="ENSMUSG00000056296"/>
      <node id="2207" label="ENSMUSG00000056162"/>
      <node id="2206" label="ENSMUSG00000056019"/>
      <node id="2205" label="ENSMUSG00000055912"/>
      <node id="2204" label="ENSMUSG00000055730"/>
      <node id="2203" label="ENSMUSG00000055675"/>
      <node id="2202" label="ENSMUSG00000055610"/>
      <node id="2201" label="ENSMUSG00000055567"/>
      <node id="2200" label="ENSMUSG00000055538"/>
      <node id="2199" label="ENSMUSG00000055493"/>
      <node id="2198" label="ENSMUSG00000055485"/>
      <node id="2197" label="ENSMUSG00000055407"/>
      <node id="2196" label="ENSMUSG00000055214"/>
      <node id="2195" label="ENSMUSG00000055172"/>
      <node id="2194" label="ENSMUSG00000055114"/>
      <node id="2193" label="ENSMUSG00000054978"/>
      <node id="2192" label="ENSMUSG00000054958"/>
      <node id="2191" label="ENSMUSG00000054932"/>
      <node id="2190" label="ENSMUSG00000054920"/>
      <node id="2189" label="ENSMUSG00000054733"/>
      <node id="2188" label="ENSMUSG00000054640"/>
      <node id="2187" label="ENSMUSG00000054630"/>
      <node id="2186" label="ENSMUSG00000054598"/>
      <node id="2185" label="ENSMUSG00000054469"/>
      <node id="2184" label="ENSMUSG00000054453"/>
      <node id="2183" label="ENSMUSG00000054428"/>
      <node id="2182" label="ENSMUSG00000054423"/>
      <node id="2181" label="ENSMUSG00000054200"/>
      <node id="2180" label="ENSMUSG00000054169"/>
      <node id="2179" label="ENSMUSG00000054128"/>
      <node id="2178" label="ENSMUSG00000053985"/>
      <node id="2177" label="ENSMUSG00000053965"/>
      <node id="2176" label="ENSMUSG00000053862"/>
      <node id="2175" label="ENSMUSG00000053617"/>
      <node id="2174" label="ENSMUSG00000053604"/>
      <node id="2173" label="ENSMUSG00000053581"/>
      <node id="2172" label="ENSMUSG00000053279"/>
      <node id="2171" label="ENSMUSG00000053219"/>
      <node id="2170" label="ENSMUSG00000053182"/>
      <node id="2169" label="ENSMUSG00000052914"/>
      <node id="2168" label="ENSMUSG00000052852"/>
      <node id="2167" label="ENSMUSG00000052676"/>
      <node id="2166" label="ENSMUSG00000052609"/>
      <node id="2165" label="ENSMUSG00000052595"/>
      <node id="2164" label="ENSMUSG00000052584"/>
      <node id="2163" label="ENSMUSG00000052396"/>
      <node id="2162" label="ENSMUSG00000052384"/>
      <node id="2161" label="ENSMUSG00000052364"/>
      <node id="2160" label="ENSMUSG00000052353"/>
      <node id="2159" label="ENSMUSG00000052212"/>
      <node id="2158" label="ENSMUSG00000052062"/>
      <node id="2157" label="ENSMUSG00000051726"/>
      <node id="2156" label="ENSMUSG00000051669"/>
      <node id="2155" label="ENSMUSG00000051652"/>
      <node id="2154" label="ENSMUSG00000051579"/>
      <node id="2153" label="ENSMUSG00000051517"/>
      <node id="2152" label="ENSMUSG00000051498"/>
      <node id="2151" label="ENSMUSG00000051497"/>
      <node id="2150" label="ENSMUSG00000051483"/>
      <node id="2149" label="ENSMUSG00000051344"/>
      <node id="2148" label="ENSMUSG00000051335"/>
      <node id="2147" label="ENSMUSG00000051314"/>
      <node id="2146" label="ENSMUSG00000051209"/>
      <node id="2145" label="ENSMUSG00000051185"/>
      <node id="2144" label="ENSMUSG00000051079"/>
      <node id="2143" label="ENSMUSG00000051067"/>
      <node id="2142" label="ENSMUSG00000050824"/>
      <node id="2141" label="ENSMUSG00000050822"/>
      <node id="2140" label="ENSMUSG00000050751"/>
      <node id="2139" label="ENSMUSG00000050711"/>
      <node id="2138" label="ENSMUSG00000050640"/>
      <node id="2137" label="ENSMUSG00000050395"/>
      <node id="2136" label="ENSMUSG00000050379"/>
      <node id="2135" label="ENSMUSG00000050357"/>
      <node id="2134" label="ENSMUSG00000050270"/>
      <node id="2133" label="ENSMUSG00000050240"/>
      <node id="2132" label="ENSMUSG00000050234"/>
      <node id="2131" label="ENSMUSG00000050103"/>
      <node id="2130" label="ENSMUSG00000050052"/>
      <node id="2129" label="ENSMUSG00000049892"/>
      <node id="2128" label="ENSMUSG00000049871"/>
      <node id="2127" label="ENSMUSG00000049858"/>
      <node id="2126" label="ENSMUSG00000049807"/>
      <node id="2125" label="ENSMUSG00000049670"/>
      <node id="2124" label="ENSMUSG00000049532"/>
      <node id="2123" label="ENSMUSG00000049436"/>
      <node id="2122" label="ENSMUSG00000049154"/>
      <node id="2121" label="ENSMUSG00000049047"/>
      <node id="2120" label="ENSMUSG00000049044"/>
      <node id="2119" label="ENSMUSG00000048997"/>
      <node id="2118" label="ENSMUSG00000048988"/>
      <node id="2117" label="ENSMUSG00000048911"/>
      <node id="2116" label="ENSMUSG00000048905"/>
      <node id="2115" label="ENSMUSG00000048763"/>
      <node id="2114" label="ENSMUSG00000048620"/>
      <node id="2113" label="ENSMUSG00000048581"/>
      <node id="2112" label="ENSMUSG00000048534"/>
      <node id="2111" label="ENSMUSG00000048485"/>
      <node id="2110" label="ENSMUSG00000048424"/>
      <node id="2109" label="ENSMUSG00000048373"/>
      <node id="2108" label="ENSMUSG00000048330"/>
      <node id="2107" label="ENSMUSG00000048279"/>
      <node id="2106" label="ENSMUSG00000048232"/>
      <node id="2105" label="ENSMUSG00000048216"/>
      <node id="2104" label="ENSMUSG00000048148"/>
      <node id="2103" label="ENSMUSG00000048078"/>
      <node id="2102" label="ENSMUSG00000048065"/>
      <node id="2101" label="ENSMUSG00000048022"/>
      <node id="2100" label="ENSMUSG00000047986"/>
      <node id="2099" label="ENSMUSG00000047963"/>
      <node id="2098" label="ENSMUSG00000047875"/>
      <node id="2097" label="ENSMUSG00000047867"/>
      <node id="2096" label="ENSMUSG00000047844"/>
      <node id="2095" label="ENSMUSG00000047842"/>
      <node id="2094" label="ENSMUSG00000047810"/>
      <node id="2093" label="ENSMUSG00000047767"/>
      <node id="2092" label="ENSMUSG00000047735"/>
      <node id="2091" label="ENSMUSG00000047730"/>
      <node id="2090" label="ENSMUSG00000047728"/>
      <node id="2089" label="ENSMUSG00000047702"/>
      <node id="2088" label="ENSMUSG00000047642"/>
      <node id="2087" label="ENSMUSG00000047641"/>
      <node id="2086" label="ENSMUSG00000047604"/>
      <node id="2085" label="ENSMUSG00000047528"/>
      <node id="2084" label="ENSMUSG00000047501"/>
      <node id="2083" label="ENSMUSG00000047473"/>
      <node id="2082" label="ENSMUSG00000047415"/>
      <node id="2081" label="ENSMUSG00000047242"/>
      <node id="2080" label="ENSMUSG00000047230"/>
      <node id="2079" label="ENSMUSG00000047181"/>
      <node id="2078" label="ENSMUSG00000046994"/>
      <node id="2077" label="ENSMUSG00000046841"/>
      <node id="2076" label="ENSMUSG00000046697"/>
      <node id="2075" label="ENSMUSG00000046688"/>
      <node id="2074" label="ENSMUSG00000046623"/>
      <node id="2073" label="ENSMUSG00000046613"/>
      <node id="2072" label="ENSMUSG00000046598"/>
      <node id="2071" label="ENSMUSG00000046589"/>
      <node id="2070" label="ENSMUSG00000046447"/>
      <node id="2069" label="ENSMUSG00000046442"/>
      <node id="2068" label="ENSMUSG00000046410"/>
      <node id="2067" label="ENSMUSG00000046295"/>
      <node id="2066" label="ENSMUSG00000046178"/>
      <node id="2065" label="ENSMUSG00000046160"/>
      <node id="2064" label="ENSMUSG00000046157"/>
      <node id="2063" label="ENSMUSG00000045912"/>
      <node id="2062" label="ENSMUSG00000045871"/>
      <node id="2061" label="ENSMUSG00000045679"/>
      <node id="2060" label="ENSMUSG00000045667"/>
      <node id="2059" label="ENSMUSG00000045518"/>
      <node id="2058" label="ENSMUSG00000045374"/>
      <node id="2057" label="ENSMUSG00000045312"/>
      <node id="2056" label="ENSMUSG00000045281"/>
      <node id="2055" label="ENSMUSG00000045165"/>
      <node id="2054" label="ENSMUSG00000045019"/>
      <node id="2053" label="ENSMUSG00000045007"/>
      <node id="2052" label="ENSMUSG00000044933"/>
      <node id="2051" label="ENSMUSG00000044921"/>
      <node id="2050" label="ENSMUSG00000044912"/>
      <node id="2049" label="ENSMUSG00000044807"/>
      <node id="2048" label="ENSMUSG00000044707"/>
      <node id="2047" label="ENSMUSG00000044456"/>
      <node id="2046" label="ENSMUSG00000044364"/>
      <node id="2045" label="ENSMUSG00000044348"/>
      <node id="2044" label="ENSMUSG00000044340"/>
      <node id="2043" label="ENSMUSG00000044317"/>
      <node id="2042" label="ENSMUSG00000044313"/>
      <node id="2041" label="ENSMUSG00000044288"/>
      <node id="2040" label="ENSMUSG00000044162"/>
      <node id="2039" label="ENSMUSG00000044150"/>
      <node id="2038" label="ENSMUSG00000044033"/>
      <node id="2037" label="ENSMUSG00000044026"/>
      <node id="2036" label="ENSMUSG00000044017"/>
      <node id="2035" label="ENSMUSG00000043953"/>
      <node id="2034" label="ENSMUSG00000043885"/>
      <node id="2033" label="ENSMUSG00000043789"/>
      <node id="2032" label="ENSMUSG00000043673"/>
      <node id="2031" label="ENSMUSG00000043592"/>
      <node id="2030" label="ENSMUSG00000043461"/>
      <node id="2029" label="ENSMUSG00000043391"/>
      <node id="2028" label="ENSMUSG00000043388"/>
      <node id="2027" label="ENSMUSG00000043262"/>
      <node id="2026" label="ENSMUSG00000043029"/>
      <node id="2025" label="ENSMUSG00000042985"/>
      <node id="2024" label="ENSMUSG00000042942"/>
      <node id="2023" label="ENSMUSG00000042873"/>
      <node id="2022" label="ENSMUSG00000042842"/>
      <node id="2021" label="ENSMUSG00000042816"/>
      <node id="2020" label="ENSMUSG00000042797"/>
      <node id="2019" label="ENSMUSG00000042751"/>
      <node id="2018" label="ENSMUSG00000042750"/>
      <node id="2017" label="ENSMUSG00000042712"/>
      <node id="2016" label="ENSMUSG00000042686"/>
      <node id="2015" label="ENSMUSG00000042581"/>
      <node id="2014" label="ENSMUSG00000042523"/>
      <node id="2013" label="ENSMUSG00000042515"/>
      <node id="2012" label="ENSMUSG00000042501"/>
      <node id="2011" label="ENSMUSG00000042500"/>
      <node id="2010" label="ENSMUSG00000042498"/>
      <node id="2009" label="ENSMUSG00000042371"/>
      <node id="2008" label="ENSMUSG00000042271"/>
      <node id="2007" label="ENSMUSG00000042251"/>
      <node id="2006" label="ENSMUSG00000042195"/>
      <node id="2005" label="ENSMUSG00000042179"/>
      <node id="2004" label="ENSMUSG00000042155"/>
      <node id="2003" label="ENSMUSG00000042041"/>
      <node id="2002" label="ENSMUSG00000041974"/>
      <node id="2001" label="ENSMUSG00000041945"/>
      <node id="2000" label="ENSMUSG00000041886"/>
      <node id="1999" label="ENSMUSG00000041836"/>
      <node id="1998" label="ENSMUSG00000041831"/>
      <node id="1997" label="ENSMUSG00000041794"/>
      <node id="1996" label="ENSMUSG00000041729"/>
      <node id="1995" label="ENSMUSG00000041696"/>
      <node id="1994" label="ENSMUSG00000041658"/>
      <node id="1993" label="ENSMUSG00000041617"/>
      <node id="1992" label="ENSMUSG00000041608"/>
      <node id="1991" label="ENSMUSG00000041476"/>
      <node id="1990" label="ENSMUSG00000041444"/>
      <node id="1989" label="ENSMUSG00000041420"/>
      <node id="1988" label="ENSMUSG00000041351"/>
      <node id="1987" label="ENSMUSG00000041202"/>
      <node id="1986" label="ENSMUSG00000041168"/>
      <node id="1985" label="ENSMUSG00000041141"/>
      <node id="1984" label="ENSMUSG00000041062"/>
      <node id="1983" label="ENSMUSG00000041000"/>
      <node id="1982" label="ENSMUSG00000040998"/>
      <node id="1981" label="ENSMUSG00000040990"/>
      <node id="1980" label="ENSMUSG00000040891"/>
      <node id="1979" label="ENSMUSG00000040875"/>
      <node id="1978" label="ENSMUSG00000040747"/>
      <node id="1977" label="ENSMUSG00000040723"/>
      <node id="1976" label="ENSMUSG00000040706"/>
      <node id="1975" label="ENSMUSG00000040640"/>
      <node id="1974" label="ENSMUSG00000040624"/>
      <node id="1973" label="ENSMUSG00000040605"/>
      <node id="1972" label="ENSMUSG00000040592"/>
      <node id="1971" label="ENSMUSG00000040563"/>
      <node id="1970" label="ENSMUSG00000040562"/>
      <node id="1969" label="ENSMUSG00000040387"/>
      <node id="1968" label="ENSMUSG00000040345"/>
      <node id="1967" label="ENSMUSG00000040296"/>
      <node id="1966" label="ENSMUSG00000040258"/>
      <node id="1965" label="ENSMUSG00000040181"/>
      <node id="1964" label="ENSMUSG00000040152"/>
      <node id="1963" label="ENSMUSG00000040147"/>
      <node id="1962" label="ENSMUSG00000040134"/>
      <node id="1961" label="ENSMUSG00000040127"/>
      <node id="1960" label="ENSMUSG00000040118"/>
      <node id="1959" label="ENSMUSG00000040003"/>
      <node id="1958" label="ENSMUSG00000039981"/>
      <node id="1957" label="ENSMUSG00000039967"/>
      <node id="1956" label="ENSMUSG00000039952"/>
      <node id="1955" label="ENSMUSG00000039943"/>
      <node id="1954" label="ENSMUSG00000039713"/>
      <node id="1953" label="ENSMUSG00000039693"/>
      <node id="1952" label="ENSMUSG00000039676"/>
      <node id="1951" label="ENSMUSG00000039648"/>
      <node id="1950" label="ENSMUSG00000039634"/>
      <node id="1949" label="ENSMUSG00000039620"/>
      <node id="1948" label="ENSMUSG00000039616"/>
      <node id="1947" label="ENSMUSG00000039607"/>
      <node id="1946" label="ENSMUSG00000039601"/>
      <node id="1945" label="ENSMUSG00000039530"/>
      <node id="1944" label="ENSMUSG00000039497"/>
      <node id="1943" label="ENSMUSG00000039384"/>
      <node id="1942" label="ENSMUSG00000039339"/>
      <node id="1941" label="ENSMUSG00000039323"/>
      <node id="1940" label="ENSMUSG00000039278"/>
      <node id="1939" label="ENSMUSG00000039232"/>
      <node id="1938" label="ENSMUSG00000039200"/>
      <node id="1937" label="ENSMUSG00000039195"/>
      <node id="1936" label="ENSMUSG00000039178"/>
      <node id="1935" label="ENSMUSG00000039166"/>
      <node id="1934" label="ENSMUSG00000039158"/>
      <node id="1933" label="ENSMUSG00000039157"/>
      <node id="1932" label="ENSMUSG00000039115"/>
      <node id="1931" label="ENSMUSG00000039114"/>
      <node id="1930" label="ENSMUSG00000039081"/>
      <node id="1929" label="ENSMUSG00000039031"/>
      <node id="1928" label="ENSMUSG00000039007"/>
      <node id="1927" label="ENSMUSG00000038903"/>
      <node id="1926" label="ENSMUSG00000038836"/>
      <node id="1925" label="ENSMUSG00000038768"/>
      <node id="1924" label="ENSMUSG00000038765"/>
      <node id="1923" label="ENSMUSG00000038751"/>
      <node id="1922" label="ENSMUSG00000038745"/>
      <node id="1921" label="ENSMUSG00000038742"/>
      <node id="1920" label="ENSMUSG00000038740"/>
      <node id="1919" label="ENSMUSG00000038704"/>
      <node id="1918" label="ENSMUSG00000038692"/>
      <node id="1917" label="ENSMUSG00000038670"/>
      <node id="1916" label="ENSMUSG00000038641"/>
      <node id="1915" label="ENSMUSG00000038580"/>
      <node id="1914" label="ENSMUSG00000038555"/>
      <node id="1913" label="ENSMUSG00000038496"/>
      <node id="1912" label="ENSMUSG00000038486"/>
      <node id="1911" label="ENSMUSG00000038463"/>
      <node id="1910" label="ENSMUSG00000038422"/>
      <node id="1909" label="ENSMUSG00000038390"/>
      <node id="1908" label="ENSMUSG00000038371"/>
      <node id="1907" label="ENSMUSG00000038296"/>
      <node id="1906" label="ENSMUSG00000038286"/>
      <node id="1905" label="ENSMUSG00000038181"/>
      <node id="1904" label="ENSMUSG00000038112"/>
      <node id="1903" label="ENSMUSG00000038042"/>
      <node id="1902" label="ENSMUSG00000038010"/>
      <node id="1901" label="ENSMUSG00000037994"/>
      <node id="1900" label="ENSMUSG00000037989"/>
      <node id="1899" label="ENSMUSG00000037953"/>
      <node id="1898" label="ENSMUSG00000037949"/>
      <node id="1897" label="ENSMUSG00000037942"/>
      <node id="1896" label="ENSMUSG00000037905"/>
      <node id="1895" label="ENSMUSG00000037797"/>
      <node id="1894" label="ENSMUSG00000037736"/>
      <node id="1893" label="ENSMUSG00000037709"/>
      <node id="1892" label="ENSMUSG00000037649"/>
      <node id="1891" label="ENSMUSG00000037617"/>
      <node id="1890" label="ENSMUSG00000037568"/>
      <node id="1889" label="ENSMUSG00000037541"/>
      <node id="1888" label="ENSMUSG00000037493"/>
      <node id="1887" label="ENSMUSG00000037348"/>
      <node id="1886" label="ENSMUSG00000037315"/>
      <node id="1885" label="ENSMUSG00000037188"/>
      <node id="1884" label="ENSMUSG00000037161"/>
      <node id="1883" label="ENSMUSG00000037106"/>
      <node id="1882" label="ENSMUSG00000037035"/>
      <node id="1881" label="ENSMUSG00000036944"/>
      <node id="1880" label="ENSMUSG00000036932"/>
      <node id="1879" label="ENSMUSG00000036923"/>
      <node id="1878" label="ENSMUSG00000036892"/>
      <node id="1877" label="ENSMUSG00000036880"/>
      <node id="1876" label="ENSMUSG00000036872"/>
      <node id="1875" label="ENSMUSG00000036813"/>
      <node id="1874" label="ENSMUSG00000036782"/>
      <node id="1873" label="ENSMUSG00000036766"/>
      <node id="1872" label="ENSMUSG00000036564"/>
      <node id="1871" label="ENSMUSG00000036526"/>
      <node id="1870" label="ENSMUSG00000036500"/>
      <node id="1869" label="ENSMUSG00000036492"/>
      <node id="1868" label="ENSMUSG00000036437"/>
      <node id="1867" label="ENSMUSG00000036368"/>
      <node id="1866" label="ENSMUSG00000036306"/>
      <node id="1865" label="ENSMUSG00000036298"/>
      <node id="1864" label="ENSMUSG00000036264"/>
      <node id="1863" label="ENSMUSG00000036256"/>
      <node id="1862" label="ENSMUSG00000036249"/>
      <node id="1861" label="ENSMUSG00000036225"/>
      <node id="1860" label="ENSMUSG00000036216"/>
      <node id="1859" label="ENSMUSG00000036181"/>
      <node id="1858" label="ENSMUSG00000036151"/>
      <node id="1857" label="ENSMUSG00000036123"/>
      <node id="1856" label="ENSMUSG00000036053"/>
      <node id="1855" label="ENSMUSG00000036022"/>
      <node id="1854" label="ENSMUSG00000035984"/>
      <node id="1853" label="ENSMUSG00000035967"/>
      <node id="1852" label="ENSMUSG00000035930"/>
      <node id="1851" label="ENSMUSG00000035896"/>
      <node id="1850" label="ENSMUSG00000035863"/>
      <node id="1849" label="ENSMUSG00000035847"/>
      <node id="1848" label="ENSMUSG00000035811"/>
      <node id="1847" label="ENSMUSG00000035783"/>
      <node id="1846" label="ENSMUSG00000035780"/>
      <node id="1845" label="ENSMUSG00000035711"/>
      <node id="1844" label="ENSMUSG00000035699"/>
      <node id="1843" label="ENSMUSG00000035637"/>
      <node id="1842" label="ENSMUSG00000035561"/>
      <node id="1841" label="ENSMUSG00000035473"/>
      <node id="1840" label="ENSMUSG00000035451"/>
      <node id="1839" label="ENSMUSG00000035390"/>
      <node id="1838" label="ENSMUSG00000035277"/>
      <node id="1837" label="ENSMUSG00000035273"/>
      <node id="1836" label="ENSMUSG00000035246"/>
      <node id="1835" label="ENSMUSG00000035239"/>
      <node id="1834" label="ENSMUSG00000035109"/>
      <node id="1833" label="ENSMUSG00000035062"/>
      <node id="1832" label="ENSMUSG00000035041"/>
      <node id="1831" label="ENSMUSG00000034863"/>
      <node id="1830" label="ENSMUSG00000034853"/>
      <node id="1829" label="ENSMUSG00000034825"/>
      <node id="1828" label="ENSMUSG00000034785"/>
      <node id="1827" label="ENSMUSG00000034768"/>
      <node id="1826" label="ENSMUSG00000034724"/>
      <node id="1825" label="ENSMUSG00000034687"/>
      <node id="1824" label="ENSMUSG00000034675"/>
      <node id="1823" label="ENSMUSG00000034663"/>
      <node id="1822" label="ENSMUSG00000034656"/>
      <node id="1821" label="ENSMUSG00000034648"/>
      <node id="1820" label="ENSMUSG00000034586"/>
      <node id="1819" label="ENSMUSG00000034528"/>
      <node id="1818" label="ENSMUSG00000034450"/>
      <node id="1817" label="ENSMUSG00000034449"/>
      <node id="1816" label="ENSMUSG00000034371"/>
      <node id="1815" label="ENSMUSG00000034353"/>
      <node id="1814" label="ENSMUSG00000034164"/>
      <node id="1813" label="ENSMUSG00000034118"/>
      <node id="1812" label="ENSMUSG00000033949"/>
      <node id="1811" label="ENSMUSG00000033917"/>
      <node id="1810" label="ENSMUSG00000033898"/>
      <node id="1809" label="ENSMUSG00000033854"/>
      <node id="1808" label="ENSMUSG00000033825"/>
      <node id="1807" label="ENSMUSG00000033684"/>
      <node id="1806" label="ENSMUSG00000033644"/>
      <node id="1805" label="ENSMUSG00000033634"/>
      <node id="1804" label="ENSMUSG00000033624"/>
      <node id="1803" label="ENSMUSG00000033610"/>
      <node id="1802" label="ENSMUSG00000033590"/>
      <node id="1801" label="ENSMUSG00000033581"/>
      <node id="1800" label="ENSMUSG00000033579"/>
      <node id="1799" label="ENSMUSG00000033545"/>
      <node id="1798" label="ENSMUSG00000033453"/>
      <node id="1797" label="ENSMUSG00000033389"/>
      <node id="1796" label="ENSMUSG00000033308"/>
      <node id="1795" label="ENSMUSG00000033278"/>
      <node id="1794" label="ENSMUSG00000033213"/>
      <node id="1793" label="ENSMUSG00000033177"/>
      <node id="1792" label="ENSMUSG00000033147"/>
      <node id="1791" label="ENSMUSG00000033107"/>
      <node id="1790" label="ENSMUSG00000033083"/>
      <node id="1789" label="ENSMUSG00000032940"/>
      <node id="1788" label="ENSMUSG00000032908"/>
      <node id="1787" label="ENSMUSG00000032902"/>
      <node id="1786" label="ENSMUSG00000032892"/>
      <node id="1785" label="ENSMUSG00000032860"/>
      <node id="1784" label="ENSMUSG00000032855"/>
      <node id="1783" label="ENSMUSG00000032808"/>
      <node id="1782" label="ENSMUSG00000032807"/>
      <node id="1781" label="ENSMUSG00000032769"/>
      <node id="1780" label="ENSMUSG00000032717"/>
      <node id="1779" label="ENSMUSG00000032702"/>
      <node id="1778" label="ENSMUSG00000032679"/>
      <node id="1777" label="ENSMUSG00000032625"/>
      <node id="1776" label="ENSMUSG00000032549"/>
      <node id="1775" label="ENSMUSG00000032532"/>
      <node id="1774" label="ENSMUSG00000032500"/>
      <node id="1773" label="ENSMUSG00000032482"/>
      <node id="1772" label="ENSMUSG00000032470"/>
      <node id="1771" label="ENSMUSG00000032454"/>
      <node id="1770" label="ENSMUSG00000032431"/>
      <node id="1769" label="ENSMUSG00000032400"/>
      <node id="1768" label="ENSMUSG00000032380"/>
      <node id="1767" label="ENSMUSG00000032377"/>
      <node id="1766" label="ENSMUSG00000032363"/>
      <node id="1765" label="ENSMUSG00000032357"/>
      <node id="1764" label="ENSMUSG00000032353"/>
      <node id="1763" label="ENSMUSG00000032322"/>
      <node id="1762" label="ENSMUSG00000032315"/>
      <node id="1761" label="ENSMUSG00000032289"/>
      <node id="1760" label="ENSMUSG00000032285"/>
      <node id="1759" label="ENSMUSG00000032278"/>
      <node id="1758" label="ENSMUSG00000032251"/>
      <node id="1757" label="ENSMUSG00000032218"/>
      <node id="1756" label="ENSMUSG00000032186"/>
      <node id="1755" label="ENSMUSG00000032184"/>
      <node id="1754" label="ENSMUSG00000032098"/>
      <node id="1753" label="ENSMUSG00000032092"/>
      <node id="1752" label="ENSMUSG00000032085"/>
      <node id="1751" label="ENSMUSG00000032083"/>
      <node id="1750" label="ENSMUSG00000032081"/>
      <node id="1749" label="ENSMUSG00000032064"/>
      <node id="1748" label="ENSMUSG00000032047"/>
      <node id="1747" label="ENSMUSG00000032033"/>
      <node id="1746" label="ENSMUSG00000032026"/>
      <node id="1745" label="ENSMUSG00000032014"/>
      <node id="1744" label="ENSMUSG00000031987"/>
      <node id="1743" label="ENSMUSG00000031957"/>
      <node id="1742" label="ENSMUSG00000031937"/>
      <node id="1741" label="ENSMUSG00000031919"/>
      <node id="1740" label="ENSMUSG00000031902"/>
      <node id="1739" label="ENSMUSG00000031891"/>
      <node id="1738" label="ENSMUSG00000031886"/>
      <node id="1737" label="ENSMUSG00000031881"/>
      <node id="1736" label="ENSMUSG00000031877"/>
      <node id="1735" label="ENSMUSG00000031875"/>
      <node id="1734" label="ENSMUSG00000031853"/>
      <node id="1733" label="ENSMUSG00000031841"/>
      <node id="1732" label="ENSMUSG00000031833"/>
      <node id="1731" label="ENSMUSG00000031785"/>
      <node id="1730" label="ENSMUSG00000031767"/>
      <node id="1729" label="ENSMUSG00000031765"/>
      <node id="1728" label="ENSMUSG00000031725"/>
      <node id="1727" label="ENSMUSG00000031712"/>
      <node id="1726" label="ENSMUSG00000031698"/>
      <node id="1725" label="ENSMUSG00000031644"/>
      <node id="1724" label="ENSMUSG00000031635"/>
      <node id="1723" label="ENSMUSG00000031595"/>
      <node id="1722" label="ENSMUSG00000031558"/>
      <node id="1721" label="ENSMUSG00000031539"/>
      <node id="1720" label="ENSMUSG00000031532"/>
      <node id="1719" label="ENSMUSG00000031521"/>
      <node id="1718" label="ENSMUSG00000031520"/>
      <node id="1717" label="ENSMUSG00000031451"/>
      <node id="1716" label="ENSMUSG00000031448"/>
      <node id="1715" label="ENSMUSG00000031445"/>
      <node id="1714" label="ENSMUSG00000031444"/>
      <node id="1713" label="ENSMUSG00000031378"/>
      <node id="1712" label="ENSMUSG00000031377"/>
      <node id="1711" label="ENSMUSG00000031375"/>
      <node id="1710" label="ENSMUSG00000031367"/>
      <node id="1709" label="ENSMUSG00000031351"/>
      <node id="1708" label="ENSMUSG00000031327"/>
      <node id="1707" label="ENSMUSG00000031303"/>
      <node id="1706" label="ENSMUSG00000031297"/>
      <node id="1705" label="ENSMUSG00000031284"/>
      <node id="1704" label="ENSMUSG00000031207"/>
      <node id="1703" label="ENSMUSG00000031173"/>
      <node id="1702" label="ENSMUSG00000031150"/>
      <node id="1701" label="ENSMUSG00000031133"/>
      <node id="1700" label="ENSMUSG00000031129"/>
      <node id="1699" label="ENSMUSG00000031075"/>
      <node id="1698" label="ENSMUSG00000030905"/>
      <node id="1697" label="ENSMUSG00000030897"/>
      <node id="1696" label="ENSMUSG00000030865"/>
      <node id="1695" label="ENSMUSG00000030830"/>
      <node id="1694" label="ENSMUSG00000030787"/>
      <node id="1693" label="ENSMUSG00000030782"/>
      <node id="1692" label="ENSMUSG00000030762"/>
      <node id="1691" label="ENSMUSG00000030761"/>
      <node id="1690" label="ENSMUSG00000030717"/>
      <node id="1689" label="ENSMUSG00000030671"/>
      <node id="1688" label="ENSMUSG00000030616"/>
      <node id="1687" label="ENSMUSG00000030543"/>
      <node id="1686" label="ENSMUSG00000030528"/>
      <node id="1685" label="ENSMUSG00000030411"/>
      <node id="1684" label="ENSMUSG00000030407"/>
      <node id="1683" label="ENSMUSG00000030401"/>
      <node id="1682" label="ENSMUSG00000030364"/>
      <node id="1681" label="ENSMUSG00000030353"/>
      <node id="1680" label="ENSMUSG00000030287"/>
      <node id="1679" label="ENSMUSG00000030246"/>
      <node id="1678" label="ENSMUSG00000030214"/>
      <node id="1677" label="ENSMUSG00000030170"/>
      <node id="1676" label="ENSMUSG00000030155"/>
      <node id="1675" label="ENSMUSG00000030145"/>
      <node id="1674" label="ENSMUSG00000030102"/>
      <node id="1673" label="ENSMUSG00000030048"/>
      <node id="1672" label="ENSMUSG00000030004"/>
      <node id="1671" label="ENSMUSG00000029924"/>
      <node id="1670" label="ENSMUSG00000029916"/>
      <node id="1669" label="ENSMUSG00000029875"/>
      <node id="1668" label="ENSMUSG00000029862"/>
      <node id="1667" label="ENSMUSG00000029832"/>
      <node id="1666" label="ENSMUSG00000029811"/>
      <node id="1665" label="ENSMUSG00000029802"/>
      <node id="1664" label="ENSMUSG00000029765"/>
      <node id="1663" label="ENSMUSG00000029762"/>
      <node id="1662" label="ENSMUSG00000029761"/>
      <node id="1661" label="ENSMUSG00000029706"/>
      <node id="1660" label="ENSMUSG00000029700"/>
      <node id="1659" label="ENSMUSG00000029664"/>
      <node id="1658" label="ENSMUSG00000029661"/>
      <node id="1657" label="ENSMUSG00000029630"/>
      <node id="1656" label="ENSMUSG00000029596"/>
      <node id="1655" label="ENSMUSG00000029545"/>
      <node id="1654" label="ENSMUSG00000029541"/>
      <node id="1653" label="ENSMUSG00000029522"/>
      <node id="1652" label="ENSMUSG00000029510"/>
      <node id="1651" label="ENSMUSG00000029470"/>
      <node id="1650" label="ENSMUSG00000029436"/>
      <node id="1649" label="ENSMUSG00000029420"/>
      <node id="1648" label="ENSMUSG00000029419"/>
      <node id="1647" label="ENSMUSG00000029413"/>
      <node id="1646" label="ENSMUSG00000029408"/>
      <node id="1645" label="ENSMUSG00000029380"/>
      <node id="1644" label="ENSMUSG00000029370"/>
      <node id="1643" label="ENSMUSG00000029369"/>
      <node id="1642" label="ENSMUSG00000029343"/>
      <node id="1641" label="ENSMUSG00000029335"/>
      <node id="1640" label="ENSMUSG00000029279"/>
      <node id="1639" label="ENSMUSG00000029269"/>
      <node id="1638" label="ENSMUSG00000029260"/>
      <node id="1637" label="ENSMUSG00000029245"/>
      <node id="1636" label="ENSMUSG00000029195"/>
      <node id="1635" label="ENSMUSG00000029188"/>
      <node id="1634" label="ENSMUSG00000029173"/>
      <node id="1633" label="ENSMUSG00000029162"/>
      <node id="1632" label="ENSMUSG00000029156"/>
      <node id="1631" label="ENSMUSG00000029134"/>
      <node id="1630" label="ENSMUSG00000029130"/>
      <node id="1629" label="ENSMUSG00000029121"/>
      <node id="1628" label="ENSMUSG00000029054"/>
      <node id="1627" label="ENSMUSG00000028996"/>
      <node id="1626" label="ENSMUSG00000028986"/>
      <node id="1625" label="ENSMUSG00000028944"/>
      <node id="1624" label="ENSMUSG00000028874"/>
      <node id="1623" label="ENSMUSG00000028836"/>
      <node id="1622" label="ENSMUSG00000028785"/>
      <node id="1621" label="ENSMUSG00000028780"/>
      <node id="1620" label="ENSMUSG00000028649"/>
      <node id="1619" label="ENSMUSG00000028645"/>
      <node id="1618" label="ENSMUSG00000028631"/>
      <node id="1617" label="ENSMUSG00000028597"/>
      <node id="1616" label="ENSMUSG00000028555"/>
      <node id="1615" label="ENSMUSG00000028527"/>
      <node id="1614" label="ENSMUSG00000028524"/>
      <node id="1613" label="ENSMUSG00000028519"/>
      <node id="1612" label="ENSMUSG00000028518"/>
      <node id="1611" label="ENSMUSG00000028389"/>
      <node id="1610" label="ENSMUSG00000028332"/>
      <node id="1609" label="ENSMUSG00000028327"/>
      <node id="1608" label="ENSMUSG00000028307"/>
      <node id="1607" label="ENSMUSG00000028278"/>
      <node id="1606" label="ENSMUSG00000028226"/>
      <node id="1605" label="ENSMUSG00000028223"/>
      <node id="1604" label="ENSMUSG00000028195"/>
      <node id="1603" label="ENSMUSG00000028173"/>
      <node id="1602" label="ENSMUSG00000028167"/>
      <node id="1601" label="ENSMUSG00000028158"/>
      <node id="1600" label="ENSMUSG00000028132"/>
      <node id="1599" label="ENSMUSG00000028111"/>
      <node id="1598" label="ENSMUSG00000028093"/>
      <node id="1597" label="ENSMUSG00000028088"/>
      <node id="1596" label="ENSMUSG00000028078"/>
      <node id="1595" label="ENSMUSG00000028076"/>
      <node id="1594" label="ENSMUSG00000028073"/>
      <node id="1593" label="ENSMUSG00000028039"/>
      <node id="1592" label="ENSMUSG00000028031"/>
      <node id="1591" label="ENSMUSG00000028024"/>
      <node id="1590" label="ENSMUSG00000028019"/>
      <node id="1589" label="ENSMUSG00000028008"/>
      <node id="1588" label="ENSMUSG00000027984"/>
      <node id="1587" label="ENSMUSG00000027937"/>
      <node id="1586" label="ENSMUSG00000027876"/>
      <node id="1585" label="ENSMUSG00000027843"/>
      <node id="1584" label="ENSMUSG00000027820"/>
      <node id="1583" label="ENSMUSG00000027801"/>
      <node id="1582" label="ENSMUSG00000027799"/>
      <node id="1581" label="ENSMUSG00000027792"/>
      <node id="1580" label="ENSMUSG00000027790"/>
      <node id="1579" label="ENSMUSG00000027748"/>
      <node id="1578" label="ENSMUSG00000027737"/>
      <node id="1577" label="ENSMUSG00000027692"/>
      <node id="1576" label="ENSMUSG00000027690"/>
      <node id="1575" label="ENSMUSG00000027674"/>
      <node id="1574" label="ENSMUSG00000027612"/>
      <node id="1573" label="ENSMUSG00000027611"/>
      <node id="1572" label="ENSMUSG00000027602"/>
      <node id="1571" label="ENSMUSG00000027570"/>
      <node id="1570" label="ENSMUSG00000027472"/>
      <node id="1569" label="ENSMUSG00000027447"/>
      <node id="1568" label="ENSMUSG00000027438"/>
      <node id="1567" label="ENSMUSG00000027435"/>
      <node id="1566" label="ENSMUSG00000027406"/>
      <node id="1565" label="ENSMUSG00000027377"/>
      <node id="1564" label="ENSMUSG00000027375"/>
      <node id="1563" label="ENSMUSG00000027360"/>
      <node id="1562" label="ENSMUSG00000027350"/>
      <node id="1561" label="ENSMUSG00000027346"/>
      <node id="1560" label="ENSMUSG00000027317"/>
      <node id="1559" label="ENSMUSG00000027316"/>
      <node id="1558" label="ENSMUSG00000027298"/>
      <node id="1557" label="ENSMUSG00000027249"/>
      <node id="1556" label="ENSMUSG00000027220"/>
      <node id="1555" label="ENSMUSG00000027219"/>
      <node id="1554" label="ENSMUSG00000027200"/>
      <node id="1553" label="ENSMUSG00000027175"/>
      <node id="1552" label="ENSMUSG00000027173"/>
      <node id="1551" label="ENSMUSG00000027075"/>
      <node id="1550" label="ENSMUSG00000027074"/>
      <node id="1549" label="ENSMUSG00000027068"/>
      <node id="1548" label="ENSMUSG00000026980"/>
      <node id="1547" label="ENSMUSG00000026970"/>
      <node id="1546" label="ENSMUSG00000026956"/>
      <node id="1545" label="ENSMUSG00000026932"/>
      <node id="1544" label="ENSMUSG00000026888"/>
      <node id="1543" label="ENSMUSG00000026833"/>
      <node id="1542" label="ENSMUSG00000026831"/>
      <node id="1541" label="ENSMUSG00000026820"/>
      <node id="1540" label="ENSMUSG00000026785"/>
      <node id="1539" label="ENSMUSG00000026779"/>
      <node id="1538" label="ENSMUSG00000026773"/>
      <node id="1537" label="ENSMUSG00000026765"/>
      <node id="1536" label="ENSMUSG00000026688"/>
      <node id="1535" label="ENSMUSG00000026687"/>
      <node id="1534" label="ENSMUSG00000026678"/>
      <node id="1533" label="ENSMUSG00000026621"/>
      <node id="1532" label="ENSMUSG00000026586"/>
      <node id="1531" label="ENSMUSG00000026546"/>
      <node id="1530" label="ENSMUSG00000026494"/>
      <node id="1529" label="ENSMUSG00000026489"/>
      <node id="1528" label="ENSMUSG00000026479"/>
      <node id="1527" label="ENSMUSG00000026475"/>
      <node id="1526" label="ENSMUSG00000026458"/>
      <node id="1525" label="ENSMUSG00000026447"/>
      <node id="1524" label="ENSMUSG00000026417"/>
      <node id="1523" label="ENSMUSG00000026415"/>
      <node id="1522" label="ENSMUSG00000026405"/>
      <node id="1521" label="ENSMUSG00000026395"/>
      <node id="1520" label="ENSMUSG00000026389"/>
      <node id="1519" label="ENSMUSG00000026380"/>
      <node id="1518" label="ENSMUSG00000026354"/>
      <node id="1517" label="ENSMUSG00000026347"/>
      <node id="1516" label="ENSMUSG00000026321"/>
      <node id="1515" label="ENSMUSG00000026311"/>
      <node id="1514" label="ENSMUSG00000026260"/>
      <node id="1513" label="ENSMUSG00000026227"/>
      <node id="1512" label="ENSMUSG00000026223"/>
      <node id="1511" label="ENSMUSG00000026205"/>
      <node id="1510" label="ENSMUSG00000026204"/>
      <node id="1509" label="ENSMUSG00000026185"/>
      <node id="1508" label="ENSMUSG00000026170"/>
      <node id="1507" label="ENSMUSG00000026167"/>
      <node id="1506" label="ENSMUSG00000026163"/>
      <node id="1505" label="ENSMUSG00000026077"/>
      <node id="1504" label="ENSMUSG00000026068"/>
      <node id="1503" label="ENSMUSG00000026043"/>
      <node id="1502" label="ENSMUSG00000025986"/>
      <node id="1501" label="ENSMUSG00000025938"/>
      <node id="1500" label="ENSMUSG00000025903"/>
      <node id="1499" label="ENSMUSG00000025887"/>
      <node id="1498" label="ENSMUSG00000025885"/>
      <node id="1497" label="ENSMUSG00000025867"/>
      <node id="1496" label="ENSMUSG00000025790"/>
      <node id="1495" label="ENSMUSG00000025779"/>
      <node id="1494" label="ENSMUSG00000025758"/>
      <node id="1493" label="ENSMUSG00000025739"/>
      <node id="1492" label="ENSMUSG00000025726"/>
      <node id="1491" label="ENSMUSG00000025652"/>
      <node id="1490" label="ENSMUSG00000025650"/>
      <node id="1489" label="ENSMUSG00000025608"/>
      <node id="1488" label="ENSMUSG00000025582"/>
      <node id="1487" label="ENSMUSG00000025576"/>
      <node id="1486" label="ENSMUSG00000025515"/>
      <node id="1485" label="ENSMUSG00000025497"/>
      <node id="1484" label="ENSMUSG00000025491"/>
      <node id="1483" label="ENSMUSG00000025479"/>
      <node id="1482" label="ENSMUSG00000025473"/>
      <node id="1481" label="ENSMUSG00000025467"/>
      <node id="1480" label="ENSMUSG00000025432"/>
      <node id="1479" label="ENSMUSG00000025428"/>
      <node id="1478" label="ENSMUSG00000025405"/>
      <node id="1477" label="ENSMUSG00000025401"/>
      <node id="1476" label="ENSMUSG00000025396"/>
      <node id="1475" label="ENSMUSG00000025348"/>
      <node id="1474" label="ENSMUSG00000025279"/>
      <node id="1473" label="ENSMUSG00000025265"/>
      <node id="1472" label="ENSMUSG00000025207"/>
      <node id="1471" label="ENSMUSG00000025203"/>
      <node id="1470" label="ENSMUSG00000025202"/>
      <node id="1469" label="ENSMUSG00000025198"/>
      <node id="1468" label="ENSMUSG00000025197"/>
      <node id="1467" label="ENSMUSG00000025175"/>
      <node id="1466" label="ENSMUSG00000025161"/>
      <node id="1465" label="ENSMUSG00000025154"/>
      <node id="1464" label="ENSMUSG00000025151"/>
      <node id="1463" label="ENSMUSG00000025150"/>
      <node id="1462" label="ENSMUSG00000025140"/>
      <node id="1461" label="ENSMUSG00000025137"/>
      <node id="1460" label="ENSMUSG00000025085"/>
      <node id="1459" label="ENSMUSG00000025081"/>
      <node id="1458" label="ENSMUSG00000025076"/>
      <node id="1457" label="ENSMUSG00000025075"/>
      <node id="1456" label="ENSMUSG00000025026"/>
      <node id="1455" label="ENSMUSG00000025020"/>
      <node id="1454" label="ENSMUSG00000024990"/>
      <node id="1453" label="ENSMUSG00000024981"/>
      <node id="1452" label="ENSMUSG00000024972"/>
      <node id="1451" label="ENSMUSG00000024960"/>
      <node id="1450" label="ENSMUSG00000024935"/>
      <node id="1449" label="ENSMUSG00000024901"/>
      <node id="1448" label="ENSMUSG00000024885"/>
      <node id="1447" label="ENSMUSG00000024873"/>
      <node id="1446" label="ENSMUSG00000024846"/>
      <node id="1445" label="ENSMUSG00000024827"/>
      <node id="1444" label="ENSMUSG00000024818"/>
      <node id="1443" label="ENSMUSG00000024803"/>
      <node id="1442" label="ENSMUSG00000024774"/>
      <node id="1441" label="ENSMUSG00000024771"/>
      <node id="1440" label="ENSMUSG00000024747"/>
      <node id="1439" label="ENSMUSG00000024682"/>
      <node id="1438" label="ENSMUSG00000024665"/>
      <node id="1437" label="ENSMUSG00000024664"/>
      <node id="1436" label="ENSMUSG00000024601"/>
      <node id="1435" label="ENSMUSG00000024553"/>
      <node id="1434" label="ENSMUSG00000024533"/>
      <node id="1433" label="ENSMUSG00000024525"/>
      <node id="1432" label="ENSMUSG00000024524"/>
      <node id="1431" label="ENSMUSG00000024512"/>
      <node id="1430" label="ENSMUSG00000024511"/>
      <node id="1429" label="ENSMUSG00000024503"/>
      <node id="1428" label="ENSMUSG00000024501"/>
      <node id="1427" label="ENSMUSG00000024424"/>
      <node id="1426" label="ENSMUSG00000024423"/>
      <node id="1425" label="ENSMUSG00000024421"/>
      <node id="1424" label="ENSMUSG00000024411"/>
      <node id="1423" label="ENSMUSG00000024366"/>
      <node id="1422" label="ENSMUSG00000024354"/>
      <node id="1421" label="ENSMUSG00000024340"/>
      <node id="1420" label="ENSMUSG00000024304"/>
      <node id="1419" label="ENSMUSG00000024302"/>
      <node id="1418" label="ENSMUSG00000024292"/>
      <node id="1417" label="ENSMUSG00000024225"/>
      <node id="1416" label="ENSMUSG00000024175"/>
      <node id="1415" label="ENSMUSG00000024131"/>
      <node id="1414" label="ENSMUSG00000024124"/>
      <node id="1413" label="ENSMUSG00000024087"/>
      <node id="1412" label="ENSMUSG00000024066"/>
      <node id="1411" label="ENSMUSG00000024063"/>
      <node id="1410" label="ENSMUSG00000024055"/>
      <node id="1409" label="ENSMUSG00000024034"/>
      <node id="1408" label="ENSMUSG00000024029"/>
      <node id="1407" label="ENSMUSG00000024028"/>
      <node id="1406" label="ENSMUSG00000024013"/>
      <node id="1405" label="ENSMUSG00000023982"/>
      <node id="1404" label="ENSMUSG00000023959"/>
      <node id="1403" label="ENSMUSG00000023914"/>
      <node id="1402" label="ENSMUSG00000023909"/>
      <node id="1401" label="ENSMUSG00000023829"/>
      <node id="1400" label="ENSMUSG00000023571"/>
      <node id="1399" label="ENSMUSG00000023495"/>
      <node id="1398" label="ENSMUSG00000023393"/>
      <node id="1397" label="ENSMUSG00000023387"/>
      <node id="1396" label="ENSMUSG00000023243"/>
      <node id="1395" label="ENSMUSG00000023236"/>
      <node id="1394" label="ENSMUSG00000023122"/>
      <node id="1393" label="ENSMUSG00000023092"/>
      <node id="1392" label="ENSMUSG00000023070"/>
      <node id="1391" label="ENSMUSG00000023050"/>
      <node id="1390" label="ENSMUSG00000023045"/>
      <node id="1389" label="ENSMUSG00000023043"/>
      <node id="1388" label="ENSMUSG00000022941"/>
      <node id="1387" label="ENSMUSG00000022938"/>
      <node id="1386" label="ENSMUSG00000022900"/>
      <node id="1385" label="ENSMUSG00000022863"/>
      <node id="1384" label="ENSMUSG00000022853"/>
      <node id="1383" label="ENSMUSG00000022805"/>
      <node id="1382" label="ENSMUSG00000022762"/>
      <node id="1381" label="ENSMUSG00000022755"/>
      <node id="1380" label="ENSMUSG00000022722"/>
      <node id="1379" label="ENSMUSG00000022707"/>
      <node id="1378" label="ENSMUSG00000022696"/>
      <node id="1377" label="ENSMUSG00000022656"/>
      <node id="1376" label="ENSMUSG00000022621"/>
      <node id="1375" label="ENSMUSG00000022619"/>
      <node id="1374" label="ENSMUSG00000022610"/>
      <node id="1373" label="ENSMUSG00000022598"/>
      <node id="1372" label="ENSMUSG00000022587"/>
      <node id="1371" label="ENSMUSG00000022574"/>
      <node id="1370" label="ENSMUSG00000022571"/>
      <node id="1369" label="ENSMUSG00000022558"/>
      <node id="1368" label="ENSMUSG00000022551"/>
      <node id="1367" label="ENSMUSG00000022537"/>
      <node id="1366" label="ENSMUSG00000022512"/>
      <node id="1365" label="ENSMUSG00000022489"/>
      <node id="1364" label="ENSMUSG00000022477"/>
      <node id="1363" label="ENSMUSG00000022456"/>
      <node id="1362" label="ENSMUSG00000022445"/>
      <node id="1361" label="ENSMUSG00000022436"/>
      <node id="1360" label="ENSMUSG00000022435"/>
      <node id="1359" label="ENSMUSG00000022332"/>
      <node id="1358" label="ENSMUSG00000022262"/>
      <node id="1357" label="ENSMUSG00000022218"/>
      <node id="1356" label="ENSMUSG00000022211"/>
      <node id="1355" label="ENSMUSG00000022210"/>
      <node id="1354" label="ENSMUSG00000022199"/>
      <node id="1353" label="ENSMUSG00000022180"/>
      <node id="1352" label="ENSMUSG00000022129"/>
      <node id="1351" label="ENSMUSG00000022123"/>
      <node id="1350" label="ENSMUSG00000022040"/>
      <node id="1349" label="ENSMUSG00000022037"/>
      <node id="1348" label="ENSMUSG00000022026"/>
      <node id="1347" label="ENSMUSG00000021994"/>
      <node id="1346" label="ENSMUSG00000021986"/>
      <node id="1345" label="ENSMUSG00000021944"/>
      <node id="1344" label="ENSMUSG00000021928"/>
      <node id="1343" label="ENSMUSG00000021913"/>
      <node id="1342" label="ENSMUSG00000021904"/>
      <node id="1341" label="ENSMUSG00000021838"/>
      <node id="1340" label="ENSMUSG00000021803"/>
      <node id="1339" label="ENSMUSG00000021798"/>
      <node id="1338" label="ENSMUSG00000021763"/>
      <node id="1337" label="ENSMUSG00000021733"/>
      <node id="1336" label="ENSMUSG00000021728"/>
      <node id="1335" label="ENSMUSG00000021700"/>
      <node id="1334" label="ENSMUSG00000021685"/>
      <node id="1333" label="ENSMUSG00000021684"/>
      <node id="1332" label="ENSMUSG00000021640"/>
      <node id="1331" label="ENSMUSG00000021609"/>
      <node id="1330" label="ENSMUSG00000021608"/>
      <node id="1329" label="ENSMUSG00000021587"/>
      <node id="1328" label="ENSMUSG00000021559"/>
      <node id="1327" label="ENSMUSG00000021553"/>
      <node id="1326" label="ENSMUSG00000021509"/>
      <node id="1325" label="ENSMUSG00000021453"/>
      <node id="1324" label="ENSMUSG00000021364"/>
      <node id="1323" label="ENSMUSG00000021340"/>
      <node id="1322" label="ENSMUSG00000021303"/>
      <node id="1321" label="ENSMUSG00000021226"/>
      <node id="1320" label="ENSMUSG00000021221"/>
      <node id="1319" label="ENSMUSG00000021213"/>
      <node id="1318" label="ENSMUSG00000021208"/>
      <node id="1317" label="ENSMUSG00000021198"/>
      <node id="1316" label="ENSMUSG00000021175"/>
      <node id="1315" label="ENSMUSG00000021123"/>
      <node id="1314" label="ENSMUSG00000021061"/>
      <node id="1313" label="ENSMUSG00000021013"/>
      <node id="1312" label="ENSMUSG00000020986"/>
      <node id="1311" label="ENSMUSG00000020953"/>
      <node id="1310" label="ENSMUSG00000020900"/>
      <node id="1309" label="ENSMUSG00000020875"/>
      <node id="1308" label="ENSMUSG00000020814"/>
      <node id="1307" label="ENSMUSG00000020788"/>
      <node id="1306" label="ENSMUSG00000020766"/>
      <node id="1305" label="ENSMUSG00000020732"/>
      <node id="1304" label="ENSMUSG00000020707"/>
      <node id="1303" label="ENSMUSG00000020696"/>
      <node id="1302" label="ENSMUSG00000020684"/>
      <node id="1301" label="ENSMUSG00000020658"/>
      <node id="1300" label="ENSMUSG00000020620"/>
      <node id="1299" label="ENSMUSG00000020600"/>
      <node id="1298" label="ENSMUSG00000020572"/>
      <node id="1297" label="ENSMUSG00000020534"/>
      <node id="1296" label="ENSMUSG00000020472"/>
      <node id="1295" label="ENSMUSG00000020469"/>
      <node id="1294" label="ENSMUSG00000020467"/>
      <node id="1293" label="ENSMUSG00000020462"/>
      <node id="1292" label="ENSMUSG00000020447"/>
      <node id="1291" label="ENSMUSG00000020435"/>
      <node id="1290" label="ENSMUSG00000020423"/>
      <node id="1289" label="ENSMUSG00000020402"/>
      <node id="1288" label="ENSMUSG00000020388"/>
      <node id="1287" label="ENSMUSG00000020381"/>
      <node id="1286" label="ENSMUSG00000020268"/>
      <node id="1285" label="ENSMUSG00000020261"/>
      <node id="1284" label="ENSMUSG00000020230"/>
      <node id="1283" label="ENSMUSG00000020229"/>
      <node id="1282" label="ENSMUSG00000020226"/>
      <node id="1281" label="ENSMUSG00000020218"/>
      <node id="1280" label="ENSMUSG00000020186"/>
      <node id="1279" label="ENSMUSG00000020178"/>
      <node id="1278" label="ENSMUSG00000020175"/>
      <node id="1277" label="ENSMUSG00000020092"/>
      <node id="1276" label="ENSMUSG00000020086"/>
      <node id="1275" label="ENSMUSG00000020034"/>
      <node id="1274" label="ENSMUSG00000020010"/>
      <node id="1273" label="ENSMUSG00000020000"/>
      <node id="1272" label="ENSMUSG00000019982"/>
      <node id="1271" label="ENSMUSG00000019945"/>
      <node id="1270" label="ENSMUSG00000019906"/>
      <node id="1269" label="ENSMUSG00000019900"/>
      <node id="1268" label="ENSMUSG00000019890"/>
      <node id="1267" label="ENSMUSG00000019877"/>
      <node id="1266" label="ENSMUSG00000019876"/>
      <node id="1265" label="ENSMUSG00000019843"/>
      <node id="1264" label="ENSMUSG00000019838"/>
      <node id="1263" label="ENSMUSG00000019775"/>
      <node id="1262" label="ENSMUSG00000019359"/>
      <node id="1261" label="ENSMUSG00000019235"/>
      <node id="1260" label="ENSMUSG00000019232"/>
      <node id="1259" label="ENSMUSG00000019124"/>
      <node id="1258" label="ENSMUSG00000019066"/>
      <node id="1257" label="ENSMUSG00000018924"/>
      <node id="1256" label="ENSMUSG00000018919"/>
      <node id="1255" label="ENSMUSG00000018906"/>
      <node id="1254" label="ENSMUSG00000018862"/>
      <node id="1253" label="ENSMUSG00000018846"/>
      <node id="1252" label="ENSMUSG00000018800"/>
      <node id="1251" label="ENSMUSG00000018752"/>
      <node id="1250" label="ENSMUSG00000018672"/>
      <node id="1249" label="ENSMUSG00000018620"/>
      <node id="1248" label="ENSMUSG00000018554"/>
      <node id="1247" label="ENSMUSG00000018507"/>
      <node id="1246" label="ENSMUSG00000018411"/>
      <node id="1245" label="ENSMUSG00000018169"/>
      <node id="1244" label="ENSMUSG00000018143"/>
      <node id="1243" label="ENSMUSG00000017943"/>
      <node id="1242" label="ENSMUSG00000017765"/>
      <node id="1241" label="ENSMUSG00000017688"/>
      <node id="1240" label="ENSMUSG00000017667"/>
      <node id="1239" label="ENSMUSG00000017453"/>
      <node id="1238" label="ENSMUSG00000017211"/>
      <node id="1237" label="ENSMUSG00000017195"/>
      <node id="1236" label="ENSMUSG00000016541"/>
      <node id="1235" label="ENSMUSG00000016534"/>
      <node id="1234" label="ENSMUSG00000016382"/>
      <node id="1233" label="ENSMUSG00000015962"/>
      <node id="1232" label="ENSMUSG00000015709"/>
      <node id="1231" label="ENSMUSG00000015405"/>
      <node id="1230" label="ENSMUSG00000015401"/>
      <node id="1229" label="ENSMUSG00000015342"/>
      <node id="1228" label="ENSMUSG00000015340"/>
      <node id="1227" label="ENSMUSG00000015222"/>
      <node id="1226" label="ENSMUSG00000015189"/>
      <node id="1225" label="ENSMUSG00000015134"/>
      <node id="1224" label="ENSMUSG00000014846"/>
      <node id="1223" label="ENSMUSG00000014599"/>
      <node id="1222" label="ENSMUSG00000013921"/>
      <node id="1221" label="ENSMUSG00000013698"/>
      <node id="1220" label="ENSMUSG00000013523"/>
      <node id="1219" label="ENSMUSG00000013083"/>
      <node id="1218" label="ENSMUSG00000012443"/>
      <node id="1217" label="ENSMUSG00000012123"/>
      <node id="1216" label="ENSMUSG00000011589"/>
      <node id="1215" label="ENSMUSG00000011034"/>
      <node id="1214" label="ENSMUSG00000011008"/>
      <node id="1213" label="ENSMUSG00000010803"/>
      <node id="1212" label="ENSMUSG00000010663"/>
      <node id="1211" label="ENSMUSG00000010651"/>
      <node id="1210" label="ENSMUSG00000010601"/>
      <node id="1209" label="ENSMUSG00000010122"/>
      <node id="1208" label="ENSMUSG00000010021"/>
      <node id="1207" label="ENSMUSG00000009646"/>
      <node id="1206" label="ENSMUSG00000009614"/>
      <node id="1205" label="ENSMUSG00000009378"/>
      <node id="1204" label="ENSMUSG00000009246"/>
      <node id="1203" label="ENSMUSG00000008540"/>
      <node id="1202" label="ENSMUSG00000008461"/>
      <node id="1201" label="ENSMUSG00000007950"/>
      <node id="1200" label="ENSMUSG00000007207"/>
      <node id="1199" label="ENSMUSG00000007039"/>
      <node id="1198" label="ENSMUSG00000006777"/>
      <node id="1197" label="ENSMUSG00000006675"/>
      <node id="1196" label="ENSMUSG00000006586"/>
      <node id="1195" label="ENSMUSG00000006575"/>
      <node id="1194" label="ENSMUSG00000006546"/>
      <node id="1193" label="ENSMUSG00000006411"/>
      <node id="1192" label="ENSMUSG00000006378"/>
      <node id="1191" label="ENSMUSG00000006369"/>
      <node id="1190" label="ENSMUSG00000006342"/>
      <node id="1189" label="ENSMUSG00000005981"/>
      <node id="1188" label="ENSMUSG00000005672"/>
      <node id="1187" label="ENSMUSG00000005553"/>
      <node id="1186" label="ENSMUSG00000005470"/>
      <node id="1185" label="ENSMUSG00000005447"/>
      <node id="1184" label="ENSMUSG00000005267"/>
      <node id="1183" label="ENSMUSG00000005237"/>
      <node id="1182" label="ENSMUSG00000004880"/>
      <node id="1181" label="ENSMUSG00000004709"/>
      <node id="1180" label="ENSMUSG00000004654"/>
      <node id="1179" label="ENSMUSG00000004558"/>
      <node id="1178" label="ENSMUSG00000004540"/>
      <node id="1177" label="ENSMUSG00000004415"/>
      <node id="1176" label="ENSMUSG00000004038"/>
      <node id="1175" label="ENSMUSG00000003573"/>
      <node id="1174" label="ENSMUSG00000003528"/>
      <node id="1173" label="ENSMUSG00000003436"/>
      <node id="1172" label="ENSMUSG00000003418"/>
      <node id="1171" label="ENSMUSG00000003355"/>
      <node id="1170" label="ENSMUSG00000003352"/>
      <node id="1169" label="ENSMUSG00000003273"/>
      <node id="1168" label="ENSMUSG00000002997"/>
      <node id="1167" label="ENSMUSG00000002847"/>
      <node id="1166" label="ENSMUSG00000002781"/>
      <node id="1165" label="ENSMUSG00000002504"/>
      <node id="1164" label="ENSMUSG00000002384"/>
      <node id="1163" label="ENSMUSG00000002365"/>
      <node id="1162" label="ENSMUSG00000002341"/>
      <node id="1161" label="ENSMUSG00000002107"/>
      <node id="1160" label="ENSMUSG00000002105"/>
      <node id="1159" label="ENSMUSG00000002006"/>
      <node id="1158" label="ENSMUSG00000001946"/>
      <node id="1157" label="ENSMUSG00000001901"/>
      <node id="1156" label="ENSMUSG00000001819"/>
      <node id="1155" label="ENSMUSG00000001802"/>
      <node id="1154" label="ENSMUSG00000001739"/>
      <node id="1153" label="ENSMUSG00000001665"/>
      <node id="1152" label="ENSMUSG00000001663"/>
      <node id="1151" label="ENSMUSG00000001604"/>
      <node id="1150" label="ENSMUSG00000001467"/>
      <node id="1149" label="ENSMUSG00000001436"/>
      <node id="1148" label="ENSMUSG00000001333"/>
      <node id="1147" label="ENSMUSG00000001270"/>
      <node id="1146" label="ENSMUSG00000001227"/>
      <node id="1145" label="ENSMUSG00000001225"/>
      <node id="1144" label="ENSMUSG00000001095"/>
      <node id="1143" label="ENSMUSG00000001025"/>
      <node id="1142" label="ENSMUSG00000001023"/>
      <node id="1141" label="ENSMUSG00000000958"/>
      <node id="1140" label="ENSMUSG00000000881"/>
      <node id="1139" label="ENSMUSG00000000791"/>
      <node id="1138" label="ENSMUSG00000000732"/>
      <node id="1137" label="ENSMUSG00000000673"/>
      <node id="1136" label="ENSMUSG00000000628"/>
      <node id="1135" label="ENSMUSG00000000416"/>
      <node id="1134" label="ENSMUSG00000000409"/>
      <node id="1133" label="ENSMUSG00000000402"/>
      <node id="1132" label="ENSMUSG00000000296"/>
      <node id="1131" label="ENSMUSG00000000253"/>
      <node id="1130" label="ENSMUSG00000000125"/>
      <node id="1129" label="ENSMUSG00000000120"/>
      <node id="1128" label="ENSMUSG00000000085"/>
      <node id="1127" label="ENSMUSG00000038530"/>
      <node id="1126" label="ENSMUSG00000034401"/>
      <node id="1125" label="ENSMUSG00000008398"/>
      <node id="1124" label="ENSMUSG00000006362"/>
      <node id="1123" label="ENSMUSG00000056035"/>
      <node id="1122" label="ENSMUSG00000052131"/>
      <node id="1121" label="ENSMUSG00000005677"/>
      <node id="1120" label="ENSMUSG00000059142"/>
      <node id="1119" label="ENSMUSG00000029287"/>
      <node id="1118" label="ENSMUSG00000029084"/>
      <node id="1117" label="ENSMUSG00000018486"/>
      <node id="1116" label="ENSMUSG00000005503"/>
      <node id="1115" label="ENSMUSG00000042010"/>
      <node id="1114" label="ENSMUSG00000041798"/>
      <node id="1113" label="ENSMUSG00000041237"/>
      <node id="1112" label="ENSMUSG00000020532"/>
      <node id="1111" label="ENSMUSG00000025402"/>
      <node id="1110" label="ENSMUSG00000020660"/>
      <node id="1109" label="ENSMUSG00000072620"/>
      <node id="1108" label="ENSMUSG00000072235"/>
      <node id="1107" label="ENSMUSG00000060002"/>
      <node id="1106" label="ENSMUSG00000056602"/>
      <node id="1105" label="ENSMUSG00000055978"/>
      <node id="1104" label="ENSMUSG00000054484"/>
      <node id="1103" label="ENSMUSG00000053137"/>
      <node id="1102" label="ENSMUSG00000050592"/>
      <node id="1101" label="ENSMUSG00000049313"/>
      <node id="1100" label="ENSMUSG00000048895"/>
      <node id="1099" label="ENSMUSG00000048473"/>
      <node id="1098" label="ENSMUSG00000042631"/>
      <node id="1097" label="ENSMUSG00000040584"/>
      <node id="1096" label="ENSMUSG00000040136"/>
      <node id="1095" label="ENSMUSG00000039958"/>
      <node id="1094" label="ENSMUSG00000038843"/>
      <node id="1093" label="ENSMUSG00000037936"/>
      <node id="1092" label="ENSMUSG00000037754"/>
      <node id="1091" label="ENSMUSG00000034593"/>
      <node id="1090" label="ENSMUSG00000034156"/>
      <node id="1089" label="ENSMUSG00000031584"/>
      <node id="1088" label="ENSMUSG00000031576"/>
      <node id="1087" label="ENSMUSG00000028614"/>
      <node id="1086" label="ENSMUSG00000028415"/>
      <node id="1085" label="ENSMUSG00000026786"/>
      <node id="1084" label="ENSMUSG00000026548"/>
      <node id="1083" label="ENSMUSG00000026094"/>
      <node id="1082" label="ENSMUSG00000023832"/>
      <node id="1081" label="ENSMUSG00000021720"/>
      <node id="1080" label="ENSMUSG00000021190"/>
      <node id="1079" label="ENSMUSG00000020641"/>
      <node id="1078" label="ENSMUSG00000020581"/>
      <node id="1077" label="ENSMUSG00000018865"/>
      <node id="1076" label="ENSMUSG00000015745"/>
      <node id="1075" label="ENSMUSG00000006800"/>
      <node id="1074" label="ENSMUSG00000004151"/>
      <node id="1073" label="ENSMUSG00000002885"/>
      <node id="1072" label="ENSMUSG00000094651"/>
      <node id="1071" label="ENSMUSG00000079037"/>
      <node id="1070" label="ENSMUSG00000070802"/>
      <node id="1069" label="ENSMUSG00000070287"/>
      <node id="1068" label="ENSMUSG00000069622"/>
      <node id="1067" label="ENSMUSG00000067925"/>
      <node id="1066" label="ENSMUSG00000066952"/>
      <node id="1065" label="ENSMUSG00000063450"/>
      <node id="1064" label="ENSMUSG00000063439"/>
      <node id="1063" label="ENSMUSG00000061111"/>
      <node id="1062" label="ENSMUSG00000059742"/>
      <node id="1061" label="ENSMUSG00000058624"/>
      <node id="1060" label="ENSMUSG00000058297"/>
      <node id="1059" label="ENSMUSG00000053216"/>
      <node id="1058" label="ENSMUSG00000051177"/>
      <node id="1057" label="ENSMUSG00000051166"/>
      <node id="1056" label="ENSMUSG00000050296"/>
      <node id="1055" label="ENSMUSG00000049148"/>
      <node id="1054" label="ENSMUSG00000048572"/>
      <node id="1053" label="ENSMUSG00000045838"/>
      <node id="1052" label="ENSMUSG00000044367"/>
      <node id="1051" label="ENSMUSG00000043639"/>
      <node id="1050" label="ENSMUSG00000043004"/>
      <node id="1049" label="ENSMUSG00000042647"/>
      <node id="1048" label="ENSMUSG00000039934"/>
      <node id="1047" label="ENSMUSG00000039851"/>
      <node id="1046" label="ENSMUSG00000039372"/>
      <node id="1045" label="ENSMUSG00000039005"/>
      <node id="1044" label="ENSMUSG00000038255"/>
      <node id="1043" label="ENSMUSG00000037636"/>
      <node id="1042" label="ENSMUSG00000037159"/>
      <node id="1041" label="ENSMUSG00000036913"/>
      <node id="1040" label="ENSMUSG00000035606"/>
      <node id="1039" label="ENSMUSG00000035509"/>
      <node id="1038" label="ENSMUSG00000035299"/>
      <node id="1037" label="ENSMUSG00000035226"/>
      <node id="1036" label="ENSMUSG00000034858"/>
      <node id="1035" label="ENSMUSG00000034774"/>
      <node id="1034" label="ENSMUSG00000034579"/>
      <node id="1033" label="ENSMUSG00000034379"/>
      <node id="1032" label="ENSMUSG00000033307"/>
      <node id="1031" label="ENSMUSG00000033061"/>
      <node id="1030" label="ENSMUSG00000032297"/>
      <node id="1029" label="ENSMUSG00000031791"/>
      <node id="1028" label="ENSMUSG00000031760"/>
      <node id="1027" label="ENSMUSG00000030406"/>
      <node id="1026" label="ENSMUSG00000027952"/>
      <node id="1025" label="ENSMUSG00000027273"/>
      <node id="1024" label="ENSMUSG00000027254"/>
      <node id="1023" label="ENSMUSG00000026961"/>
      <node id="1022" label="ENSMUSG00000026764"/>
      <node id="1021" label="ENSMUSG00000026692"/>
      <node id="1020" label="ENSMUSG00000026443"/>
      <node id="1019" label="ENSMUSG00000026335"/>
      <node id="1018" label="ENSMUSG00000025551"/>
      <node id="1017" label="ENSMUSG00000025091"/>
      <node id="1016" label="ENSMUSG00000025027"/>
      <node id="1015" label="ENSMUSG00000024033"/>
      <node id="1014" label="ENSMUSG00000023224"/>
      <node id="1013" label="ENSMUSG00000022769"/>
      <node id="1012" label="ENSMUSG00000022687"/>
      <node id="1011" label="ENSMUSG00000022054"/>
      <node id="1010" label="ENSMUSG00000022014"/>
      <node id="1009" label="ENSMUSG00000021337"/>
      <node id="1008" label="ENSMUSG00000020808"/>
      <node id="1007" label="ENSMUSG00000019831"/>
      <node id="1006" label="ENSMUSG00000019796"/>
      <node id="1005" label="ENSMUSG00000019761"/>
      <node id="1004" label="ENSMUSG00000017652"/>
      <node id="1003" label="ENSMUSG00000014164"/>
      <node id="1002" label="ENSMUSG00000010505"/>
      <node id="1001" label="ENSMUSG00000006494"/>
      <node id="1000" label="ENSMUSG00000005951"/>
      <node id="999" label="ENSMUSG00000005949"/>
      <node id="998" label="ENSMUSG00000005355"/>
      <node id="997" label="ENSMUSG00000005268"/>
      <node id="996" label="ENSMUSG00000004113"/>
      <node id="995" label="ENSMUSG00000002266"/>
      <node id="994" label="ENSMUSG00000002265"/>
      <node id="993" label="ENSMUSG00000024030"/>
      <node id="992" label="ENSMUSG00000021125"/>
      <node id="991" label="ENSMUSG00000005373"/>
      <node id="990" label="ENSMUSG00000003123"/>
      <node id="989" label="ENSMUSG00000002108"/>
      <node id="988" label="ENSMUSG00000001566"/>
      <node id="987" label="ENSMUSG00000001517"/>
      <node id="986" label="ENSMUSG00000000942"/>
      <node id="985" label="ENSMUSG00000110266"/>
      <node id="984" label="ENSMUSG00000110086"/>
      <node id="983" label="ENSMUSG00000108348"/>
      <node id="982" label="ENSMUSG00000099689"/>
      <node id="981" label="ENSMUSG00000098678"/>
      <node id="980" label="ENSMUSG00000098557"/>
      <node id="979" label="ENSMUSG00000098132"/>
      <node id="978" label="ENSMUSG00000096847"/>
      <node id="977" label="ENSMUSG00000096472"/>
      <node id="976" label="ENSMUSG00000095105"/>
      <node id="975" label="ENSMUSG00000095026"/>
      <node id="974" label="ENSMUSG00000094928"/>
      <node id="973" label="ENSMUSG00000094626"/>
      <node id="972" label="ENSMUSG00000094091"/>
      <node id="971" label="ENSMUSG00000091387"/>
      <node id="970" label="ENSMUSG00000091243"/>
      <node id="969" label="ENSMUSG00000090291"/>
      <node id="968" label="ENSMUSG00000090100"/>
      <node id="967" label="ENSMUSG00000081769"/>
      <node id="966" label="ENSMUSG00000079497"/>
      <node id="965" label="ENSMUSG00000079442"/>
      <node id="964" label="ENSMUSG00000079055"/>
      <node id="963" label="ENSMUSG00000079018"/>
      <node id="962" label="ENSMUSG00000078954"/>
      <node id="961" label="ENSMUSG00000078851"/>
      <node id="960" label="ENSMUSG00000078664"/>
      <node id="959" label="ENSMUSG00000078650"/>
      <node id="958" label="ENSMUSG00000078202"/>
      <node id="957" label="ENSMUSG00000078185"/>
      <node id="956" label="ENSMUSG00000075701"/>
      <node id="955" label="ENSMUSG00000075122"/>
      <node id="954" label="ENSMUSG00000075012"/>
      <node id="953" label="ENSMUSG00000074625"/>
      <node id="952" label="ENSMUSG00000074476"/>
      <node id="951" label="ENSMUSG00000074282"/>
      <node id="950" label="ENSMUSG00000074183"/>
      <node id="949" label="ENSMUSG00000073988"/>
      <node id="948" label="ENSMUSG00000073889"/>
      <node id="947" label="ENSMUSG00000073421"/>
      <node id="946" label="ENSMUSG00000072949"/>
      <node id="945" label="ENSMUSG00000072946"/>
      <node id="944" label="ENSMUSG00000072812"/>
      <node id="943" label="ENSMUSG00000072623"/>
      <node id="942" label="ENSMUSG00000072214"/>
      <node id="941" label="ENSMUSG00000072115"/>
      <node id="940" label="ENSMUSG00000071847"/>
      <node id="939" label="ENSMUSG00000071553"/>
      <node id="938" label="ENSMUSG00000071537"/>
      <node id="937" label="ENSMUSG00000071506"/>
      <node id="936" label="ENSMUSG00000071226"/>
      <node id="935" label="ENSMUSG00000070867"/>
      <node id="934" label="ENSMUSG00000070777"/>
      <node id="933" label="ENSMUSG00000070733"/>
      <node id="932" label="ENSMUSG00000070687"/>
      <node id="931" label="ENSMUSG00000070407"/>
      <node id="930" label="ENSMUSG00000069814"/>
      <node id="929" label="ENSMUSG00000069793"/>
      <node id="928" label="ENSMUSG00000069255"/>
      <node id="927" label="ENSMUSG00000069170"/>
      <node id="926" label="ENSMUSG00000069114"/>
      <node id="925" label="ENSMUSG00000068742"/>
      <node id="924" label="ENSMUSG00000068735"/>
      <node id="923" label="ENSMUSG00000068699"/>
      <node id="922" label="ENSMUSG00000068617"/>
      <node id="921" label="ENSMUSG00000068270"/>
      <node id="920" label="ENSMUSG00000068196"/>
      <node id="919" label="ENSMUSG00000067924"/>
      <node id="918" label="ENSMUSG00000067279"/>
      <node id="917" label="ENSMUSG00000067006"/>
      <node id="916" label="ENSMUSG00000066720"/>
      <node id="915" label="ENSMUSG00000066026"/>
      <node id="914" label="ENSMUSG00000065952"/>
      <node id="913" label="ENSMUSG00000064262"/>
      <node id="912" label="ENSMUSG00000064247"/>
      <node id="911" label="ENSMUSG00000064246"/>
      <node id="910" label="ENSMUSG00000064215"/>
      <node id="909" label="ENSMUSG00000064202"/>
      <node id="908" label="ENSMUSG00000064090"/>
      <node id="907" label="ENSMUSG00000063767"/>
      <node id="906" label="ENSMUSG00000063727"/>
      <node id="905" label="ENSMUSG00000063531"/>
      <node id="904" label="ENSMUSG00000063524"/>
      <node id="903" label="ENSMUSG00000063229"/>
      <node id="902" label="ENSMUSG00000062908"/>
      <node id="901" label="ENSMUSG00000062683"/>
      <node id="900" label="ENSMUSG00000062252"/>
      <node id="899" label="ENSMUSG00000062248"/>
      <node id="898" label="ENSMUSG00000062078"/>
      <node id="897" label="ENSMUSG00000062070"/>
      <node id="896" label="ENSMUSG00000061607"/>
      <node id="895" label="ENSMUSG00000061578"/>
      <node id="894" label="ENSMUSG00000061531"/>
      <node id="893" label="ENSMUSG00000061397"/>
      <node id="892" label="ENSMUSG00000060962"/>
      <node id="891" label="ENSMUSG00000060733"/>
      <node id="890" label="ENSMUSG00000060487"/>
      <node id="889" label="ENSMUSG00000060397"/>
      <node id="888" label="ENSMUSG00000060301"/>
      <node id="887" label="ENSMUSG00000060176"/>
      <node id="886" label="ENSMUSG00000059991"/>
      <node id="885" label="ENSMUSG00000059970"/>
      <node id="884" label="ENSMUSG00000059824"/>
      <node id="883" label="ENSMUSG00000059743"/>
      <node id="882" label="ENSMUSG00000059540"/>
      <node id="881" label="ENSMUSG00000059493"/>
      <node id="880" label="ENSMUSG00000059412"/>
      <node id="879" label="ENSMUSG00000059401"/>
      <node id="878" label="ENSMUSG00000059013"/>
      <node id="877" label="ENSMUSG00000058975"/>
      <node id="876" label="ENSMUSG00000058672"/>
      <node id="875" label="ENSMUSG00000058454"/>
      <node id="874" label="ENSMUSG00000058290"/>
      <node id="873" label="ENSMUSG00000058145"/>
      <node id="872" label="ENSMUSG00000058070"/>
      <node id="871" label="ENSMUSG00000057719"/>
      <node id="870" label="ENSMUSG00000057604"/>
      <node id="869" label="ENSMUSG00000057335"/>
      <node id="868" label="ENSMUSG00000057092"/>
      <node id="867" label="ENSMUSG00000056895"/>
      <node id="866" label="ENSMUSG00000056832"/>
      <node id="865" label="ENSMUSG00000056737"/>
      <node id="864" label="ENSMUSG00000056632"/>
      <node id="863" label="ENSMUSG00000056531"/>
      <node id="862" label="ENSMUSG00000056529"/>
      <node id="861" label="ENSMUSG00000056185"/>
      <node id="860" label="ENSMUSG00000056069"/>
      <node id="859" label="ENSMUSG00000055980"/>
      <node id="858" label="ENSMUSG00000055963"/>
      <node id="857" label="ENSMUSG00000055862"/>
      <node id="856" label="ENSMUSG00000055809"/>
      <node id="855" label="ENSMUSG00000055745"/>
      <node id="854" label="ENSMUSG00000055733"/>
      <node id="853" label="ENSMUSG00000055150"/>
      <node id="852" label="ENSMUSG00000054967"/>
      <node id="851" label="ENSMUSG00000054893"/>
      <node id="850" label="ENSMUSG00000054855"/>
      <node id="849" label="ENSMUSG00000054793"/>
      <node id="848" label="ENSMUSG00000054764"/>
      <node id="847" label="ENSMUSG00000054717"/>
      <node id="846" label="ENSMUSG00000054582"/>
      <node id="845" label="ENSMUSG00000054474"/>
      <node id="844" label="ENSMUSG00000054342"/>
      <node id="843" label="ENSMUSG00000054150"/>
      <node id="842" label="ENSMUSG00000053846"/>
      <node id="841" label="ENSMUSG00000053783"/>
      <node id="840" label="ENSMUSG00000053768"/>
      <node id="839" label="ENSMUSG00000053765"/>
      <node id="838" label="ENSMUSG00000053702"/>
      <node id="837" label="ENSMUSG00000053580"/>
      <node id="836" label="ENSMUSG00000053470"/>
      <node id="835" label="ENSMUSG00000053460"/>
      <node id="834" label="ENSMUSG00000053334"/>
      <node id="833" label="ENSMUSG00000053317"/>
      <node id="832" label="ENSMUSG00000053199"/>
      <node id="831" label="ENSMUSG00000053080"/>
      <node id="830" label="ENSMUSG00000053054"/>
      <node id="829" label="ENSMUSG00000053046"/>
      <node id="828" label="ENSMUSG00000052921"/>
      <node id="827" label="ENSMUSG00000052560"/>
      <node id="826" label="ENSMUSG00000052392"/>
      <node id="825" label="ENSMUSG00000052135"/>
      <node id="824" label="ENSMUSG00000052105"/>
      <node id="823" label="ENSMUSG00000052087"/>
      <node id="822" label="ENSMUSG00000051980"/>
      <node id="821" label="ENSMUSG00000051977"/>
      <node id="820" label="ENSMUSG00000051727"/>
      <node id="819" label="ENSMUSG00000051359"/>
      <node id="818" label="ENSMUSG00000051343"/>
      <node id="817" label="ENSMUSG00000051076"/>
      <node id="816" label="ENSMUSG00000050953"/>
      <node id="815" label="ENSMUSG00000050777"/>
      <node id="814" label="ENSMUSG00000050737"/>
      <node id="813" label="ENSMUSG00000050721"/>
      <node id="812" label="ENSMUSG00000050677"/>
      <node id="811" label="ENSMUSG00000050335"/>
      <node id="810" label="ENSMUSG00000050323"/>
      <node id="809" label="ENSMUSG00000050148"/>
      <node id="808" label="ENSMUSG00000050132"/>
      <node id="807" label="ENSMUSG00000050064"/>
      <node id="806" label="ENSMUSG00000049878"/>
      <node id="805" label="ENSMUSG00000049866"/>
      <node id="804" label="ENSMUSG00000049723"/>
      <node id="803" label="ENSMUSG00000049690"/>
      <node id="802" label="ENSMUSG00000049588"/>
      <node id="801" label="ENSMUSG00000049580"/>
      <node id="800" label="ENSMUSG00000049551"/>
      <node id="799" label="ENSMUSG00000049536"/>
      <node id="798" label="ENSMUSG00000049493"/>
      <node id="797" label="ENSMUSG00000049288"/>
      <node id="796" label="ENSMUSG00000049184"/>
      <node id="795" label="ENSMUSG00000049038"/>
      <node id="794" label="ENSMUSG00000048970"/>
      <node id="793" label="ENSMUSG00000048965"/>
      <node id="792" label="ENSMUSG00000048644"/>
      <node id="791" label="ENSMUSG00000048612"/>
      <node id="790" label="ENSMUSG00000048458"/>
      <node id="789" label="ENSMUSG00000048450"/>
      <node id="788" label="ENSMUSG00000048440"/>
      <node id="787" label="ENSMUSG00000048376"/>
      <node id="786" label="ENSMUSG00000048349"/>
      <node id="785" label="ENSMUSG00000048217"/>
      <node id="784" label="ENSMUSG00000048058"/>
      <node id="783" label="ENSMUSG00000047976"/>
      <node id="782" label="ENSMUSG00000047945"/>
      <node id="781" label="ENSMUSG00000047907"/>
      <node id="780" label="ENSMUSG00000047797"/>
      <node id="779" label="ENSMUSG00000047747"/>
      <node id="778" label="ENSMUSG00000047534"/>
      <node id="777" label="ENSMUSG00000047507"/>
      <node id="776" label="ENSMUSG00000047221"/>
      <node id="775" label="ENSMUSG00000047205"/>
      <node id="774" label="ENSMUSG00000047139"/>
      <node id="773" label="ENSMUSG00000046826"/>
      <node id="772" label="ENSMUSG00000046814"/>
      <node id="771" label="ENSMUSG00000046711"/>
      <node id="770" label="ENSMUSG00000046668"/>
      <node id="769" label="ENSMUSG00000046591"/>
      <node id="768" label="ENSMUSG00000046550"/>
      <node id="767" label="ENSMUSG00000046546"/>
      <node id="766" label="ENSMUSG00000046402"/>
      <node id="765" label="ENSMUSG00000046242"/>
      <node id="764" label="ENSMUSG00000046223"/>
      <node id="763" label="ENSMUSG00000046215"/>
      <node id="762" label="ENSMUSG00000046093"/>
      <node id="761" label="ENSMUSG00000046070"/>
      <node id="760" label="ENSMUSG00000046058"/>
      <node id="759" label="ENSMUSG00000045896"/>
      <node id="758" label="ENSMUSG00000045790"/>
      <node id="757" label="ENSMUSG00000045629"/>
      <node id="756" label="ENSMUSG00000045441"/>
      <node id="755" label="ENSMUSG00000045382"/>
      <node id="754" label="ENSMUSG00000045349"/>
      <node id="753" label="ENSMUSG00000045294"/>
      <node id="752" label="ENSMUSG00000045215"/>
      <node id="751" label="ENSMUSG00000045094"/>
      <node id="750" label="ENSMUSG00000045027"/>
      <node id="749" label="ENSMUSG00000044748"/>
      <node id="748" label="ENSMUSG00000044674"/>
      <node id="747" label="ENSMUSG00000044646"/>
      <node id="746" label="ENSMUSG00000044548"/>
      <node id="745" label="ENSMUSG00000044468"/>
      <node id="744" label="ENSMUSG00000044461"/>
      <node id="743" label="ENSMUSG00000044312"/>
      <node id="742" label="ENSMUSG00000044254"/>
      <node id="741" label="ENSMUSG00000044244"/>
      <node id="740" label="ENSMUSG00000044201"/>
      <node id="739" label="ENSMUSG00000044072"/>
      <node id="738" label="ENSMUSG00000043542"/>
      <node id="737" label="ENSMUSG00000043518"/>
      <node id="736" label="ENSMUSG00000043419"/>
      <node id="735" label="ENSMUSG00000043154"/>
      <node id="734" label="ENSMUSG00000043068"/>
      <node id="733" label="ENSMUSG00000042763"/>
      <node id="732" label="ENSMUSG00000042734"/>
      <node id="731" label="ENSMUSG00000042675"/>
      <node id="730" label="ENSMUSG00000042607"/>
      <node id="729" label="ENSMUSG00000042564"/>
      <node id="728" label="ENSMUSG00000042429"/>
      <node id="727" label="ENSMUSG00000042359"/>
      <node id="726" label="ENSMUSG00000042333"/>
      <node id="725" label="ENSMUSG00000042306"/>
      <node id="724" label="ENSMUSG00000042303"/>
      <node id="723" label="ENSMUSG00000042258"/>
      <node id="722" label="ENSMUSG00000042213"/>
      <node id="721" label="ENSMUSG00000042115"/>
      <node id="720" label="ENSMUSG00000042109"/>
      <node id="719" label="ENSMUSG00000042099"/>
      <node id="718" label="ENSMUSG00000042096"/>
      <node id="717" label="ENSMUSG00000042042"/>
      <node id="716" label="ENSMUSG00000042035"/>
      <node id="715" label="ENSMUSG00000041930"/>
      <node id="714" label="ENSMUSG00000041889"/>
      <node id="713" label="ENSMUSG00000041733"/>
      <node id="712" label="ENSMUSG00000041632"/>
      <node id="711" label="ENSMUSG00000041609"/>
      <node id="710" label="ENSMUSG00000041570"/>
      <node id="709" label="ENSMUSG00000041548"/>
      <node id="708" label="ENSMUSG00000041431"/>
      <node id="707" label="ENSMUSG00000041268"/>
      <node id="706" label="ENSMUSG00000041219"/>
      <node id="705" label="ENSMUSG00000041193"/>
      <node id="704" label="ENSMUSG00000041143"/>
      <node id="703" label="ENSMUSG00000041126"/>
      <node id="702" label="ENSMUSG00000041120"/>
      <node id="701" label="ENSMUSG00000041096"/>
      <node id="700" label="ENSMUSG00000041075"/>
      <node id="699" label="ENSMUSG00000041064"/>
      <node id="698" label="ENSMUSG00000041058"/>
      <node id="697" label="ENSMUSG00000041040"/>
      <node id="696" label="ENSMUSG00000041025"/>
      <node id="695" label="ENSMUSG00000040972"/>
      <node id="694" label="ENSMUSG00000040918"/>
      <node id="693" label="ENSMUSG00000040852"/>
      <node id="692" label="ENSMUSG00000040663"/>
      <node id="691" label="ENSMUSG00000040631"/>
      <node id="690" label="ENSMUSG00000040495"/>
      <node id="689" label="ENSMUSG00000040462"/>
      <node id="688" label="ENSMUSG00000040447"/>
      <node id="687" label="ENSMUSG00000040433"/>
      <node id="686" label="ENSMUSG00000040430"/>
      <node id="685" label="ENSMUSG00000040389"/>
      <node id="684" label="ENSMUSG00000040351"/>
      <node id="683" label="ENSMUSG00000040280"/>
      <node id="682" label="ENSMUSG00000040276"/>
      <node id="681" label="ENSMUSG00000040209"/>
      <node id="680" label="ENSMUSG00000040170"/>
      <node id="679" label="ENSMUSG00000040084"/>
      <node id="678" label="ENSMUSG00000039911"/>
      <node id="677" label="ENSMUSG00000039814"/>
      <node id="676" label="ENSMUSG00000039813"/>
      <node id="675" label="ENSMUSG00000039809"/>
      <node id="674" label="ENSMUSG00000039740"/>
      <node id="673" label="ENSMUSG00000039683"/>
      <node id="672" label="ENSMUSG00000039470"/>
      <node id="671" label="ENSMUSG00000039396"/>
      <node id="670" label="ENSMUSG00000039304"/>
      <node id="669" label="ENSMUSG00000039270"/>
      <node id="668" label="ENSMUSG00000039168"/>
      <node id="667" label="ENSMUSG00000039145"/>
      <node id="666" label="ENSMUSG00000039126"/>
      <node id="665" label="ENSMUSG00000039087"/>
      <node id="664" label="ENSMUSG00000039059"/>
      <node id="663" label="ENSMUSG00000039050"/>
      <node id="662" label="ENSMUSG00000039013"/>
      <node id="661" label="ENSMUSG00000039004"/>
      <node id="660" label="ENSMUSG00000038984"/>
      <node id="659" label="ENSMUSG00000038884"/>
      <node id="658" label="ENSMUSG00000038879"/>
      <node id="657" label="ENSMUSG00000038777"/>
      <node id="656" label="ENSMUSG00000038644"/>
      <node id="655" label="ENSMUSG00000038602"/>
      <node id="654" label="ENSMUSG00000038599"/>
      <node id="653" label="ENSMUSG00000038560"/>
      <node id="652" label="ENSMUSG00000038456"/>
      <node id="651" label="ENSMUSG00000038451"/>
      <node id="650" label="ENSMUSG00000038379"/>
      <node id="649" label="ENSMUSG00000038354"/>
      <node id="648" label="ENSMUSG00000038349"/>
      <node id="647" label="ENSMUSG00000038319"/>
      <node id="646" label="ENSMUSG00000038312"/>
      <node id="645" label="ENSMUSG00000038305"/>
      <node id="644" label="ENSMUSG00000038175"/>
      <node id="643" label="ENSMUSG00000037991"/>
      <node id="642" label="ENSMUSG00000037972"/>
      <node id="641" label="ENSMUSG00000037946"/>
      <node id="640" label="ENSMUSG00000037855"/>
      <node id="639" label="ENSMUSG00000037852"/>
      <node id="638" label="ENSMUSG00000037820"/>
      <node id="637" label="ENSMUSG00000037784"/>
      <node id="636" label="ENSMUSG00000037712"/>
      <node id="635" label="ENSMUSG00000037686"/>
      <node id="634" label="ENSMUSG00000037679"/>
      <node id="633" label="ENSMUSG00000037664"/>
      <node id="632" label="ENSMUSG00000037628"/>
      <node id="631" label="ENSMUSG00000037624"/>
      <node id="630" label="ENSMUSG00000037621"/>
      <node id="629" label="ENSMUSG00000037606"/>
      <node id="628" label="ENSMUSG00000037594"/>
      <node id="627" label="ENSMUSG00000037579"/>
      <node id="626" label="ENSMUSG00000037509"/>
      <node id="625" label="ENSMUSG00000037447"/>
      <node id="624" label="ENSMUSG00000037440"/>
      <node id="623" label="ENSMUSG00000037428"/>
      <node id="622" label="ENSMUSG00000037405"/>
      <node id="621" label="ENSMUSG00000037386"/>
      <node id="620" label="ENSMUSG00000037379"/>
      <node id="619" label="ENSMUSG00000037235"/>
      <node id="618" label="ENSMUSG00000037217"/>
      <node id="617" label="ENSMUSG00000037169"/>
      <node id="616" label="ENSMUSG00000037071"/>
      <node id="615" label="ENSMUSG00000037005"/>
      <node id="614" label="ENSMUSG00000036989"/>
      <node id="613" label="ENSMUSG00000036915"/>
      <node id="612" label="ENSMUSG00000036912"/>
      <node id="611" label="ENSMUSG00000036887"/>
      <node id="610" label="ENSMUSG00000036875"/>
      <node id="609" label="ENSMUSG00000036863"/>
      <node id="608" label="ENSMUSG00000036832"/>
      <node id="607" label="ENSMUSG00000036745"/>
      <node id="606" label="ENSMUSG00000036667"/>
      <node id="605" label="ENSMUSG00000036599"/>
      <node id="604" label="ENSMUSG00000036067"/>
      <node id="603" label="ENSMUSG00000036036"/>
      <node id="602" label="ENSMUSG00000035901"/>
      <node id="601" label="ENSMUSG00000035900"/>
      <node id="600" label="ENSMUSG00000035849"/>
      <node id="599" label="ENSMUSG00000035722"/>
      <node id="598" label="ENSMUSG00000035683"/>
      <node id="597" label="ENSMUSG00000035642"/>
      <node id="596" label="ENSMUSG00000035506"/>
      <node id="595" label="ENSMUSG00000035504"/>
      <node id="594" label="ENSMUSG00000035441"/>
      <node id="593" label="ENSMUSG00000035431"/>
      <node id="592" label="ENSMUSG00000035357"/>
      <node id="591" label="ENSMUSG00000035279"/>
      <node id="590" label="ENSMUSG00000035235"/>
      <node id="589" label="ENSMUSG00000035181"/>
      <node id="588" label="ENSMUSG00000035164"/>
      <node id="587" label="ENSMUSG00000035107"/>
      <node id="586" label="ENSMUSG00000035105"/>
      <node id="585" label="ENSMUSG00000035095"/>
      <node id="584" label="ENSMUSG00000034981"/>
      <node id="583" label="ENSMUSG00000034781"/>
      <node id="582" label="ENSMUSG00000034773"/>
      <node id="581" label="ENSMUSG00000034684"/>
      <node id="580" label="ENSMUSG00000034634"/>
      <node id="579" label="ENSMUSG00000034573"/>
      <node id="578" label="ENSMUSG00000034538"/>
      <node id="577" label="ENSMUSG00000034472"/>
      <node id="576" label="ENSMUSG00000034413"/>
      <node id="575" label="ENSMUSG00000034285"/>
      <node id="574" label="ENSMUSG00000034265"/>
      <node id="573" label="ENSMUSG00000034227"/>
      <node id="572" label="ENSMUSG00000034116"/>
      <node id="571" label="ENSMUSG00000034006"/>
      <node id="570" label="ENSMUSG00000033952"/>
      <node id="569" label="ENSMUSG00000033900"/>
      <node id="568" label="ENSMUSG00000033871"/>
      <node id="567" label="ENSMUSG00000033740"/>
      <node id="566" label="ENSMUSG00000033717"/>
      <node id="565" label="ENSMUSG00000033705"/>
      <node id="564" label="ENSMUSG00000033685"/>
      <node id="563" label="ENSMUSG00000033530"/>
      <node id="562" label="ENSMUSG00000033491"/>
      <node id="561" label="ENSMUSG00000033379"/>
      <node id="560" label="ENSMUSG00000033318"/>
      <node id="559" label="ENSMUSG00000033287"/>
      <node id="558" label="ENSMUSG00000033256"/>
      <node id="557" label="ENSMUSG00000033209"/>
      <node id="556" label="ENSMUSG00000033161"/>
      <node id="555" label="ENSMUSG00000033152"/>
      <node id="554" label="ENSMUSG00000033105"/>
      <node id="553" label="ENSMUSG00000033033"/>
      <node id="552" label="ENSMUSG00000032978"/>
      <node id="551" label="ENSMUSG00000032965"/>
      <node id="550" label="ENSMUSG00000032883"/>
      <node id="549" label="ENSMUSG00000032854"/>
      <node id="548" label="ENSMUSG00000032852"/>
      <node id="547" label="ENSMUSG00000032849"/>
      <node id="546" label="ENSMUSG00000032783"/>
      <node id="545" label="ENSMUSG00000032754"/>
      <node id="544" label="ENSMUSG00000032740"/>
      <node id="543" label="ENSMUSG00000032733"/>
      <node id="542" label="ENSMUSG00000032666"/>
      <node id="541" label="ENSMUSG00000032656"/>
      <node id="540" label="ENSMUSG00000032561"/>
      <node id="539" label="ENSMUSG00000032531"/>
      <node id="538" label="ENSMUSG00000032528"/>
      <node id="537" label="ENSMUSG00000032502"/>
      <node id="536" label="ENSMUSG00000032417"/>
      <node id="535" label="ENSMUSG00000032411"/>
      <node id="534" label="ENSMUSG00000032373"/>
      <node id="533" label="ENSMUSG00000032358"/>
      <node id="532" label="ENSMUSG00000032356"/>
      <node id="531" label="ENSMUSG00000032338"/>
      <node id="530" label="ENSMUSG00000032314"/>
      <node id="529" label="ENSMUSG00000032294"/>
      <node id="528" label="ENSMUSG00000032245"/>
      <node id="527" label="ENSMUSG00000032238"/>
      <node id="526" label="ENSMUSG00000032202"/>
      <node id="525" label="ENSMUSG00000032018"/>
      <node id="524" label="ENSMUSG00000032017"/>
      <node id="523" label="ENSMUSG00000031980"/>
      <node id="522" label="ENSMUSG00000031951"/>
      <node id="521" label="ENSMUSG00000031925"/>
      <node id="520" label="ENSMUSG00000031903"/>
      <node id="519" label="ENSMUSG00000031845"/>
      <node id="518" label="ENSMUSG00000031827"/>
      <node id="517" label="ENSMUSG00000031790"/>
      <node id="516" label="ENSMUSG00000031788"/>
      <node id="515" label="ENSMUSG00000031668"/>
      <node id="514" label="ENSMUSG00000031661"/>
      <node id="513" label="ENSMUSG00000031647"/>
      <node id="512" label="ENSMUSG00000031629"/>
      <node id="511" label="ENSMUSG00000031626"/>
      <node id="510" label="ENSMUSG00000031617"/>
      <node id="509" label="ENSMUSG00000031586"/>
      <node id="508" label="ENSMUSG00000031562"/>
      <node id="507" label="ENSMUSG00000031538"/>
      <node id="506" label="ENSMUSG00000031453"/>
      <node id="505" label="ENSMUSG00000031441"/>
      <node id="504" label="ENSMUSG00000031387"/>
      <node id="503" label="ENSMUSG00000031381"/>
      <node id="502" label="ENSMUSG00000031373"/>
      <node id="501" label="ENSMUSG00000031353"/>
      <node id="500" label="ENSMUSG00000031328"/>
      <node id="499" label="ENSMUSG00000031220"/>
      <node id="498" label="ENSMUSG00000031214"/>
      <node id="497" label="ENSMUSG00000031155"/>
      <node id="496" label="ENSMUSG00000031144"/>
      <node id="495" label="ENSMUSG00000031098"/>
      <node id="494" label="ENSMUSG00000031004"/>
      <node id="493" label="ENSMUSG00000030878"/>
      <node id="492" label="ENSMUSG00000030772"/>
      <node id="491" label="ENSMUSG00000030769"/>
      <node id="490" label="ENSMUSG00000030747"/>
      <node id="489" label="ENSMUSG00000030659"/>
      <node id="488" label="ENSMUSG00000030643"/>
      <node id="487" label="ENSMUSG00000030518"/>
      <node id="486" label="ENSMUSG00000030510"/>
      <node id="485" label="ENSMUSG00000030410"/>
      <node id="484" label="ENSMUSG00000030329"/>
      <node id="483" label="ENSMUSG00000030137"/>
      <node id="482" label="ENSMUSG00000030110"/>
      <node id="481" label="ENSMUSG00000030107"/>
      <node id="480" label="ENSMUSG00000030087"/>
      <node id="479" label="ENSMUSG00000030074"/>
      <node id="478" label="ENSMUSG00000029919"/>
      <node id="477" label="ENSMUSG00000029910"/>
      <node id="476" label="ENSMUSG00000029847"/>
      <node id="475" label="ENSMUSG00000029814"/>
      <node id="474" label="ENSMUSG00000029772"/>
      <node id="473" label="ENSMUSG00000029769"/>
      <node id="472" label="ENSMUSG00000029712"/>
      <node id="471" label="ENSMUSG00000029674"/>
      <node id="470" label="ENSMUSG00000029644"/>
      <node id="469" label="ENSMUSG00000029601"/>
      <node id="468" label="ENSMUSG00000029560"/>
      <node id="467" label="ENSMUSG00000029521"/>
      <node id="466" label="ENSMUSG00000029484"/>
      <node id="465" label="ENSMUSG00000029330"/>
      <node id="464" label="ENSMUSG00000029177"/>
      <node id="463" label="ENSMUSG00000029168"/>
      <node id="462" label="ENSMUSG00000029161"/>
      <node id="461" label="ENSMUSG00000029154"/>
      <node id="460" label="ENSMUSG00000029153"/>
      <node id="459" label="ENSMUSG00000029095"/>
      <node id="458" label="ENSMUSG00000029094"/>
      <node id="457" label="ENSMUSG00000029059"/>
      <node id="456" label="ENSMUSG00000028943"/>
      <node id="455" label="ENSMUSG00000028940"/>
      <node id="454" label="ENSMUSG00000028849"/>
      <node id="453" label="ENSMUSG00000028763"/>
      <node id="452" label="ENSMUSG00000028749"/>
      <node id="451" label="ENSMUSG00000028747"/>
      <node id="450" label="ENSMUSG00000028716"/>
      <node id="449" label="ENSMUSG00000028713"/>
      <node id="448" label="ENSMUSG00000028702"/>
      <node id="447" label="ENSMUSG00000028641"/>
      <node id="446" label="ENSMUSG00000028634"/>
      <node id="445" label="ENSMUSG00000028602"/>
      <node id="444" label="ENSMUSG00000028576"/>
      <node id="443" label="ENSMUSG00000028557"/>
      <node id="442" label="ENSMUSG00000028542"/>
      <node id="441" label="ENSMUSG00000028517"/>
      <node id="440" label="ENSMUSG00000028444"/>
      <node id="439" label="ENSMUSG00000028439"/>
      <node id="438" label="ENSMUSG00000028438"/>
      <node id="437" label="ENSMUSG00000028435"/>
      <node id="436" label="ENSMUSG00000028341"/>
      <node id="435" label="ENSMUSG00000028312"/>
      <node id="434" label="ENSMUSG00000028289"/>
      <node id="433" label="ENSMUSG00000028246"/>
      <node id="432" label="ENSMUSG00000028211"/>
      <node id="431" label="ENSMUSG00000028186"/>
      <node id="430" label="ENSMUSG00000027995"/>
      <node id="429" label="ENSMUSG00000027954"/>
      <node id="428" label="ENSMUSG00000027938"/>
      <node id="427" label="ENSMUSG00000027931"/>
      <node id="426" label="ENSMUSG00000027907"/>
      <node id="425" label="ENSMUSG00000027890"/>
      <node id="424" label="ENSMUSG00000027883"/>
      <node id="423" label="ENSMUSG00000027834"/>
      <node id="422" label="ENSMUSG00000027750"/>
      <node id="421" label="ENSMUSG00000027746"/>
      <node id="420" label="ENSMUSG00000027715"/>
      <node id="419" label="ENSMUSG00000027698"/>
      <node id="418" label="ENSMUSG00000027661"/>
      <node id="417" label="ENSMUSG00000027654"/>
      <node id="416" label="ENSMUSG00000027534"/>
      <node id="415" label="ENSMUSG00000027514"/>
      <node id="414" label="ENSMUSG00000027499"/>
      <node id="413" label="ENSMUSG00000027469"/>
      <node id="412" label="ENSMUSG00000027420"/>
      <node id="411" label="ENSMUSG00000027379"/>
      <node id="410" label="ENSMUSG00000027358"/>
      <node id="409" label="ENSMUSG00000027333"/>
      <node id="408" label="ENSMUSG00000027326"/>
      <node id="407" label="ENSMUSG00000027313"/>
      <node id="406" label="ENSMUSG00000027187"/>
      <node id="405" label="ENSMUSG00000027082"/>
      <node id="404" label="ENSMUSG00000027006"/>
      <node id="403" label="ENSMUSG00000026981"/>
      <node id="402" label="ENSMUSG00000026959"/>
      <node id="401" label="ENSMUSG00000026930"/>
      <node id="400" label="ENSMUSG00000026921"/>
      <node id="399" label="ENSMUSG00000026880"/>
      <node id="398" label="ENSMUSG00000026879"/>
      <node id="397" label="ENSMUSG00000026848"/>
      <node id="396" label="ENSMUSG00000026782"/>
      <node id="395" label="ENSMUSG00000026730"/>
      <node id="394" label="ENSMUSG00000026649"/>
      <node id="393" label="ENSMUSG00000026605"/>
      <node id="392" label="ENSMUSG00000026604"/>
      <node id="391" label="ENSMUSG00000026527"/>
      <node id="390" label="ENSMUSG00000026520"/>
      <node id="389" label="ENSMUSG00000026509"/>
      <node id="388" label="ENSMUSG00000026504"/>
      <node id="387" label="ENSMUSG00000026483"/>
      <node id="386" label="ENSMUSG00000026482"/>
      <node id="385" label="ENSMUSG00000026442"/>
      <node id="384" label="ENSMUSG00000026430"/>
      <node id="383" label="ENSMUSG00000026385"/>
      <node id="382" label="ENSMUSG00000026278"/>
      <node id="381" label="ENSMUSG00000026247"/>
      <node id="380" label="ENSMUSG00000026107"/>
      <node id="379" label="ENSMUSG00000026103"/>
      <node id="378" label="ENSMUSG00000026090"/>
      <node id="377" label="ENSMUSG00000026072"/>
      <node id="376" label="ENSMUSG00000025991"/>
      <node id="375" label="ENSMUSG00000025969"/>
      <node id="374" label="ENSMUSG00000025959"/>
      <node id="373" label="ENSMUSG00000025921"/>
      <node id="372" label="ENSMUSG00000025893"/>
      <node id="371" label="ENSMUSG00000025876"/>
      <node id="370" label="ENSMUSG00000025780"/>
      <node id="369" label="ENSMUSG00000025701"/>
      <node id="368" label="ENSMUSG00000025648"/>
      <node id="367" label="ENSMUSG00000025584"/>
      <node id="366" label="ENSMUSG00000025557"/>
      <node id="365" label="ENSMUSG00000025545"/>
      <node id="364" label="ENSMUSG00000025511"/>
      <node id="363" label="ENSMUSG00000025500"/>
      <node id="362" label="ENSMUSG00000025477"/>
      <node id="361" label="ENSMUSG00000025410"/>
      <node id="360" label="ENSMUSG00000025352"/>
      <node id="359" label="ENSMUSG00000025351"/>
      <node id="358" label="ENSMUSG00000025227"/>
      <node id="357" label="ENSMUSG00000025185"/>
      <node id="356" label="ENSMUSG00000025176"/>
      <node id="355" label="ENSMUSG00000025089"/>
      <node id="354" label="ENSMUSG00000025037"/>
      <node id="353" label="ENSMUSG00000025035"/>
      <node id="352" label="ENSMUSG00000025025"/>
      <node id="351" label="ENSMUSG00000025001"/>
      <node id="350" label="ENSMUSG00000024998"/>
      <node id="349" label="ENSMUSG00000024978"/>
      <node id="348" label="ENSMUSG00000024909"/>
      <node id="347" label="ENSMUSG00000024899"/>
      <node id="346" label="ENSMUSG00000024897"/>
      <node id="345" label="ENSMUSG00000024887"/>
      <node id="344" label="ENSMUSG00000024810"/>
      <node id="343" label="ENSMUSG00000024795"/>
      <node id="342" label="ENSMUSG00000024743"/>
      <node id="341" label="ENSMUSG00000024738"/>
      <node id="340" label="ENSMUSG00000024727"/>
      <node id="339" label="ENSMUSG00000024713"/>
      <node id="338" label="ENSMUSG00000024659"/>
      <node id="337" label="ENSMUSG00000024600"/>
      <node id="336" label="ENSMUSG00000024590"/>
      <node id="335" label="ENSMUSG00000024556"/>
      <node id="334" label="ENSMUSG00000024552"/>
      <node id="333" label="ENSMUSG00000024548"/>
      <node id="332" label="ENSMUSG00000024516"/>
      <node id="331" label="ENSMUSG00000024479"/>
      <node id="330" label="ENSMUSG00000024378"/>
      <node id="329" label="ENSMUSG00000024352"/>
      <node id="328" label="ENSMUSG00000024349"/>
      <node id="327" label="ENSMUSG00000024330"/>
      <node id="326" label="ENSMUSG00000024232"/>
      <node id="325" label="ENSMUSG00000024193"/>
      <node id="324" label="ENSMUSG00000024140"/>
      <node id="323" label="ENSMUSG00000024112"/>
      <node id="322" label="ENSMUSG00000024105"/>
      <node id="321" label="ENSMUSG00000024074"/>
      <node id="320" label="ENSMUSG00000023963"/>
      <node id="319" label="ENSMUSG00000023961"/>
      <node id="318" label="ENSMUSG00000023940"/>
      <node id="317" label="ENSMUSG00000023906"/>
      <node id="316" label="ENSMUSG00000023905"/>
      <node id="315" label="ENSMUSG00000023827"/>
      <node id="314" label="ENSMUSG00000023809"/>
      <node id="313" label="ENSMUSG00000023800"/>
      <node id="312" label="ENSMUSG00000023473"/>
      <node id="311" label="ENSMUSG00000023262"/>
      <node id="310" label="ENSMUSG00000023247"/>
      <node id="309" label="ENSMUSG00000023216"/>
      <node id="308" label="ENSMUSG00000023078"/>
      <node id="307" label="ENSMUSG00000023032"/>
      <node id="306" label="ENSMUSG00000023017"/>
      <node id="305" label="ENSMUSG00000023015"/>
      <node id="304" label="ENSMUSG00000023008"/>
      <node id="303" label="ENSMUSG00000023004"/>
      <node id="302" label="ENSMUSG00000022995"/>
      <node id="301" label="ENSMUSG00000022947"/>
      <node id="300" label="ENSMUSG00000022883"/>
      <node id="299" label="ENSMUSG00000022864"/>
      <node id="298" label="ENSMUSG00000022844"/>
      <node id="297" label="ENSMUSG00000022836"/>
      <node id="296" label="ENSMUSG00000022829"/>
      <node id="295" label="ENSMUSG00000022817"/>
      <node id="294" label="ENSMUSG00000022742"/>
      <node id="293" label="ENSMUSG00000022652"/>
      <node id="292" label="ENSMUSG00000022637"/>
      <node id="291" label="ENSMUSG00000022629"/>
      <node id="290" label="ENSMUSG00000022555"/>
      <node id="289" label="ENSMUSG00000022546"/>
      <node id="288" label="ENSMUSG00000022543"/>
      <node id="287" label="ENSMUSG00000022519"/>
      <node id="286" label="ENSMUSG00000022364"/>
      <node id="285" label="ENSMUSG00000022324"/>
      <node id="284" label="ENSMUSG00000022265"/>
      <node id="283" label="ENSMUSG00000022253"/>
      <node id="282" label="ENSMUSG00000022235"/>
      <node id="281" label="ENSMUSG00000022219"/>
      <node id="280" label="ENSMUSG00000022217"/>
      <node id="279" label="ENSMUSG00000022208"/>
      <node id="278" label="ENSMUSG00000022178"/>
      <node id="277" label="ENSMUSG00000022148"/>
      <node id="276" label="ENSMUSG00000022136"/>
      <node id="275" label="ENSMUSG00000022094"/>
      <node id="274" label="ENSMUSG00000022051"/>
      <node id="273" label="ENSMUSG00000022033"/>
      <node id="272" label="ENSMUSG00000021974"/>
      <node id="271" label="ENSMUSG00000021957"/>
      <node id="270" label="ENSMUSG00000021947"/>
      <node id="269" label="ENSMUSG00000021876"/>
      <node id="268" label="ENSMUSG00000021831"/>
      <node id="267" label="ENSMUSG00000021822"/>
      <node id="266" label="ENSMUSG00000021806"/>
      <node id="265" label="ENSMUSG00000021725"/>
      <node id="264" label="ENSMUSG00000021701"/>
      <node id="263" label="ENSMUSG00000021604"/>
      <node id="262" label="ENSMUSG00000021565"/>
      <node id="261" label="ENSMUSG00000021539"/>
      <node id="260" label="ENSMUSG00000021477"/>
      <node id="259" label="ENSMUSG00000021367"/>
      <node id="258" label="ENSMUSG00000021280"/>
      <node id="257" label="ENSMUSG00000021240"/>
      <node id="256" label="ENSMUSG00000021223"/>
      <node id="255" label="ENSMUSG00000021203"/>
      <node id="254" label="ENSMUSG00000021196"/>
      <node id="253" label="ENSMUSG00000021194"/>
      <node id="252" label="ENSMUSG00000021185"/>
      <node id="251" label="ENSMUSG00000021108"/>
      <node id="250" label="ENSMUSG00000021094"/>
      <node id="249" label="ENSMUSG00000020978"/>
      <node id="248" label="ENSMUSG00000020897"/>
      <node id="247" label="ENSMUSG00000020894"/>
      <node id="246" label="ENSMUSG00000020892"/>
      <node id="245" label="ENSMUSG00000020872"/>
      <node id="244" label="ENSMUSG00000020846"/>
      <node id="243" label="ENSMUSG00000020838"/>
      <node id="242" label="ENSMUSG00000020747"/>
      <node id="241" label="ENSMUSG00000020741"/>
      <node id="240" label="ENSMUSG00000020715"/>
      <node id="239" label="ENSMUSG00000020674"/>
      <node id="238" label="ENSMUSG00000020668"/>
      <node id="237" label="ENSMUSG00000020635"/>
      <node id="236" label="ENSMUSG00000020599"/>
      <node id="235" label="ENSMUSG00000020471"/>
      <node id="234" label="ENSMUSG00000020424"/>
      <node id="233" label="ENSMUSG00000020407"/>
      <node id="232" label="ENSMUSG00000020387"/>
      <node id="231" label="ENSMUSG00000020376"/>
      <node id="230" label="ENSMUSG00000020363"/>
      <node id="229" label="ENSMUSG00000020334"/>
      <node id="228" label="ENSMUSG00000020303"/>
      <node id="227" label="ENSMUSG00000020277"/>
      <node id="226" label="ENSMUSG00000020121"/>
      <node id="225" label="ENSMUSG00000020105"/>
      <node id="224" label="ENSMUSG00000020015"/>
      <node id="223" label="ENSMUSG00000020014"/>
      <node id="222" label="ENSMUSG00000020009"/>
      <node id="221" label="ENSMUSG00000019997"/>
      <node id="220" label="ENSMUSG00000019986"/>
      <node id="219" label="ENSMUSG00000019942"/>
      <node id="218" label="ENSMUSG00000019916"/>
      <node id="217" label="ENSMUSG00000019853"/>
      <node id="216" label="ENSMUSG00000019846"/>
      <node id="215" label="ENSMUSG00000019817"/>
      <node id="214" label="ENSMUSG00000019762"/>
      <node id="213" label="ENSMUSG00000019647"/>
      <node id="212" label="ENSMUSG00000019564"/>
      <node id="211" label="ENSMUSG00000019194"/>
      <node id="210" label="ENSMUSG00000019158"/>
      <node id="209" label="ENSMUSG00000019087"/>
      <node id="208" label="ENSMUSG00000018983"/>
      <node id="207" label="ENSMUSG00000018774"/>
      <node id="206" label="ENSMUSG00000018740"/>
      <node id="205" label="ENSMUSG00000018593"/>
      <node id="204" label="ENSMUSG00000018566"/>
      <node id="203" label="ENSMUSG00000018340"/>
      <node id="202" label="ENSMUSG00000018334"/>
      <node id="201" label="ENSMUSG00000018042"/>
      <node id="200" label="ENSMUSG00000017724"/>
      <node id="199" label="ENSMUSG00000017716"/>
      <node id="198" label="ENSMUSG00000017692"/>
      <node id="197" label="ENSMUSG00000017639"/>
      <node id="196" label="ENSMUSG00000017466"/>
      <node id="195" label="ENSMUSG00000017446"/>
      <node id="194" label="ENSMUSG00000017204"/>
      <node id="193" label="ENSMUSG00000017165"/>
      <node id="192" label="ENSMUSG00000016763"/>
      <node id="191" label="ENSMUSG00000016758"/>
      <node id="190" label="ENSMUSG00000016624"/>
      <node id="189" label="ENSMUSG00000016200"/>
      <node id="188" label="ENSMUSG00000016028"/>
      <node id="187" label="ENSMUSG00000015880"/>
      <node id="186" label="ENSMUSG00000015850"/>
      <node id="185" label="ENSMUSG00000015829"/>
      <node id="184" label="ENSMUSG00000015806"/>
      <node id="183" label="ENSMUSG00000015647"/>
      <node id="182" label="ENSMUSG00000015533"/>
      <node id="181" label="ENSMUSG00000015396"/>
      <node id="180" label="ENSMUSG00000015224"/>
      <node id="179" label="ENSMUSG00000015112"/>
      <node id="178" label="ENSMUSG00000014602"/>
      <node id="177" label="ENSMUSG00000014361"/>
      <node id="176" label="ENSMUSG00000014351"/>
      <node id="175" label="ENSMUSG00000014303"/>
      <node id="174" label="ENSMUSG00000013846"/>
      <node id="173" label="ENSMUSG00000013089"/>
      <node id="172" label="ENSMUSG00000012126"/>
      <node id="171" label="ENSMUSG00000012017"/>
      <node id="170" label="ENSMUSG00000011752"/>
      <node id="169" label="ENSMUSG00000011148"/>
      <node id="168" label="ENSMUSG00000010830"/>
      <node id="167" label="ENSMUSG00000010362"/>
      <node id="166" label="ENSMUSG00000009863"/>
      <node id="165" label="ENSMUSG00000009739"/>
      <node id="164" label="ENSMUSG00000008734"/>
      <node id="163" label="ENSMUSG00000008090"/>
      <node id="162" label="ENSMUSG00000007989"/>
      <node id="161" label="ENSMUSG00000007888"/>
      <node id="160" label="ENSMUSG00000006930"/>
      <node id="159" label="ENSMUSG00000006731"/>
      <node id="158" label="ENSMUSG00000006642"/>
      <node id="157" label="ENSMUSG00000006464"/>
      <node id="156" label="ENSMUSG00000006463"/>
      <node id="155" label="ENSMUSG00000006435"/>
      <node id="154" label="ENSMUSG00000006345"/>
      <node id="153" label="ENSMUSG00000005986"/>
      <node id="152" label="ENSMUSG00000005973"/>
      <node id="151" label="ENSMUSG00000005958"/>
      <node id="150" label="ENSMUSG00000005873"/>
      <node id="149" label="ENSMUSG00000005611"/>
      <node id="148" label="ENSMUSG00000005413"/>
      <node id="147" label="ENSMUSG00000005360"/>
      <node id="146" label="ENSMUSG00000005320"/>
      <node id="145" label="ENSMUSG00000005107"/>
      <node id="144" label="ENSMUSG00000004951"/>
      <node id="143" label="ENSMUSG00000004864"/>
      <node id="142" label="ENSMUSG00000004789"/>
      <node id="141" label="ENSMUSG00000004768"/>
      <node id="140" label="ENSMUSG00000004328"/>
      <node id="139" label="ENSMUSG00000004270"/>
      <node id="138" label="ENSMUSG00000004044"/>
      <node id="137" label="ENSMUSG00000003949"/>
      <node id="136" label="ENSMUSG00000003545"/>
      <node id="135" label="ENSMUSG00000003541"/>
      <node id="134" label="ENSMUSG00000003469"/>
      <node id="133" label="ENSMUSG00000003420"/>
      <node id="132" label="ENSMUSG00000003380"/>
      <node id="131" label="ENSMUSG00000003134"/>
      <node id="130" label="ENSMUSG00000002799"/>
      <node id="129" label="ENSMUSG00000002625"/>
      <node id="128" label="ENSMUSG00000002565"/>
      <node id="127" label="ENSMUSG00000001864"/>
      <node id="126" label="ENSMUSG00000001761"/>
      <node id="125" label="ENSMUSG00000001473"/>
      <node id="124" label="ENSMUSG00000001435"/>
      <node id="123" label="ENSMUSG00000001281"/>
      <node id="122" label="ENSMUSG00000001120"/>
      <node id="121" label="ENSMUSG00000001119"/>
      <node id="120" label="ENSMUSG00000001039"/>
      <node id="119" label="ENSMUSG00000000555"/>
      <node id="118" label="ENSMUSG00000000394"/>
      <node id="117" label="ENSMUSG00000000308"/>
      <node id="116" label="ENSMUSG00000000214"/>
      <node id="115" label="ENSMUSG00000000126"/>
      <node id="114" label="ENSMUSG00000000056"/>
      <node id="113" label="ENSMUSG00000000567"/>
      <node id="112" label="ENSMUSG00000055639"/>
      <node id="111" label="ENSMUSG00000053007"/>
      <node id="110" label="ENSMUSG00000032487"/>
      <node id="109" label="ENSMUSG00000032035"/>
      <node id="108" label="ENSMUSG00000027544"/>
      <node id="107" label="ENSMUSG00000018909"/>
      <node id="106" label="ENSMUSG00000026398"/>
      <node id="105" label="ENSMUSG00000040249"/>
      <node id="104" label="ENSMUSG00000037032"/>
      <node id="103" label="ENSMUSG00000069515"/>
      <node id="102" label="ENSMUSG00000034957"/>
      <node id="101" label="ENSMUSG00000022528"/>
      <node id="100" label="ENSMUSG00000034771"/>
      <node id="99" label="ENSMUSG00000035158"/>
      <node id="98" label="ENSMUSG00000027985"/>
      <node id="97" label="ENSMUSG00000027210"/>
      <node id="96" label="ENSMUSG00000020455"/>
      <node id="95" label="ENSMUSG00000027168"/>
      <node id="94" label="ENSMUSG00000024912"/>
      <node id="93" label="ENSMUSG00000027695"/>
      <node id="92" label="ENSMUSG00000054422"/>
      <node id="91" label="ENSMUSG00000015568"/>
      <node id="90" label="ENSMUSG00000052684"/>
      <node id="89" label="ENSMUSG00000022105"/>
      <node id="88" label="ENSMUSG00000039236"/>
      <node id="87" label="ENSMUSG00000020184"/>
      <node id="86" label="ENSMUSG00000018899"/>
      <node id="85" label="ENSMUSG00000020889"/>
      <node id="84" label="ENSMUSG00000018501"/>
      <node id="83" label="ENSMUSG00000037583"/>
      <node id="82" label="ENSMUSG00000029167"/>
      <node id="81" label="ENSMUSG00000017950"/>
      <node id="80" label="ENSMUSG00000058756"/>
      <node id="79" label="ENSMUSG00000024431"/>
      <node id="78" label="ENSMUSG00000022809"/>
      <node id="77" label="ENSMUSG00000022479"/>
      <node id="76" label="ENSMUSG00000022383"/>
      <node id="75" label="ENSMUSG00000021779"/>
      <node id="74" label="ENSMUSG00000015846"/>
      <node id="73" label="ENSMUSG00000029275"/>
      <node id="72" label="ENSMUSG00000010175"/>
      <edge id="40194" label="mmu-miR-221-5p (miRNA-mRNA) ENSMUSG00000080316" source="3113" target="3114" cy:directed="1"/>
      <edge id="40193" label="mmu-miR-92a-1-5p (miRNA-mRNA) ENSMUSG00000025410" source="3078" target="361" cy:directed="1"/>
      <edge id="40192" label="mmu-miR-92a-1-5p (miRNA-mRNA) ENSMUSG00000032086" source="3078" target="2561" cy:directed="1"/>
      <edge id="40191" label="mmu-miR-344-3p (miRNA-mRNA) ENSMUSG00000040412" source="3062" target="3063" cy:directed="1"/>
      <edge id="40190" label="mmu-miR-344-3p (miRNA-mRNA) ENSMUSG00000039270" source="3062" target="669" cy:directed="1"/>
      <edge id="40189" label="mmu-miR-344-3p (miRNA-mRNA) ENSMUSG00000036295" source="3062" target="2960" cy:directed="1"/>
      <edge id="40188" label="mmu-miR-344-3p (miRNA-mRNA) ENSMUSG00000038486" source="3062" target="1912" cy:directed="1"/>
      <edge id="40187" label="mmu-miR-344-3p (miRNA-mRNA) ENSMUSG00000036745" source="3062" target="607" cy:directed="1"/>
      <edge id="40186" label="mmu-miR-344-3p (miRNA-mRNA) ENSMUSG00000028649" source="3062" target="1620" cy:directed="1"/>
      <edge id="40185" label="mmu-miR-344-3p (miRNA-mRNA) ENSMUSG00000038530" source="3062" target="1127" cy:directed="1"/>
      <edge id="40184" label="mmu-miR-344-3p (miRNA-mRNA) ENSMUSG00000031367" source="3062" target="1710" cy:directed="1"/>
      <edge id="40183" label="mmu-miR-344-3p (miRNA-mRNA) ENSMUSG00000026764" source="3062" target="1022" cy:directed="1"/>
      <edge id="40182" label="mmu-miR-344-3p (miRNA-mRNA) ENSMUSG00000037852" source="3062" target="639" cy:directed="1"/>
      <edge id="40181" label="mmu-miR-344-3p (miRNA-mRNA) ENSMUSG00000033717" source="3062" target="566" cy:directed="1"/>
      <edge id="40180" label="mmu-miR-344-3p (miRNA-mRNA) ENSMUSG00000037709" source="3062" target="1893" cy:directed="1"/>
      <edge id="40179" label="mmu-miR-344-3p (miRNA-mRNA) ENSMUSG00000026605" source="3062" target="393" cy:directed="1"/>
      <edge id="40178" label="mmu-miR-344-3p (miRNA-mRNA) ENSMUSG00000029772" source="3062" target="474" cy:directed="1"/>
      <edge id="40177" label="mmu-miR-344-3p (miRNA-mRNA) ENSMUSG00000018865" source="3062" target="1077" cy:directed="1"/>
      <edge id="40176" label="mmu-miR-344-3p (miRNA-mRNA) ENSMUSG00000020423" source="3062" target="1290" cy:directed="1"/>
      <edge id="40175" label="mmu-miR-344-3p (miRNA-mRNA) ENSMUSG00000015222" source="3062" target="1227" cy:directed="1"/>
      <edge id="40174" label="mmu-miR-344-3p (miRNA-mRNA) ENSMUSG00000015829" source="3062" target="185" cy:directed="1"/>
      <edge id="40173" label="mmu-miR-344-3p (miRNA-mRNA) ENSMUSG00000022883" source="3062" target="300" cy:directed="1"/>
      <edge id="40172" label="mmu-miR-344-3p (miRNA-mRNA) ENSMUSG00000021701" source="3062" target="264" cy:directed="1"/>
      <edge id="40171" label="mmu-miR-344-3p (miRNA-mRNA) ENSMUSG00000019877" source="3062" target="1267" cy:directed="1"/>
      <edge id="40170" label="mmu-miR-344-3p (miRNA-mRNA) ENSMUSG00000020044" source="3062" target="2894" cy:directed="1"/>
      <edge id="40169" label="mmu-miR-344-3p (miRNA-mRNA) ENSMUSG00000024087" source="3062" target="1413" cy:directed="1"/>
      <edge id="40168" label="mmu-miR-344-3p (miRNA-mRNA) ENSMUSG00000017466" source="3062" target="196" cy:directed="1"/>
      <edge id="40167" label="mmu-miR-344-3p (miRNA-mRNA) ENSMUSG00000007989" source="3062" target="162" cy:directed="1"/>
      <edge id="40166" label="mmu-miR-344-3p (miRNA-mRNA) ENSMUSG00000026103" source="3062" target="379" cy:directed="1"/>
      <edge id="40165" label="mmu-miR-344-3p (miRNA-mRNA) ENSMUSG00000005360" source="3062" target="147" cy:directed="1"/>
      <edge id="40164" label="mmu-miR-344-3p (miRNA-mRNA) ENSMUSG00000010803" source="3062" target="1213" cy:directed="1"/>
      <edge id="40163" label="mmu-miR-344-3p (miRNA-mRNA) ENSMUSG00000003469" source="3062" target="134" cy:directed="1"/>
      <edge id="40162" label="mmu-miR-344-3p (miRNA-mRNA) ENSMUSG00000021066" source="3062" target="2937" cy:directed="1"/>
      <edge id="40161" label="mmu-miR-344-3p (miRNA-mRNA) ENSMUSG00000023473" source="3062" target="312" cy:directed="1"/>
      <edge id="40160" label="mmu-miR-344-3p (miRNA-mRNA) ENSMUSG00000026223" source="3062" target="1512" cy:directed="1"/>
      <edge id="40159" label="mmu-miR-344-3p (miRNA-mRNA) ENSMUSG00000015599" source="3062" target="2971" cy:directed="1"/>
      <edge id="40158" label="mmu-miR-344-3p (miRNA-mRNA) ENSMUSG00000002265" source="3062" target="994" cy:directed="1"/>
      <edge id="40157" label="mmu-miR-344-3p (miRNA-mRNA) ENSMUSG00000024030" source="3062" target="993" cy:directed="1"/>
      <edge id="40156" label="mmu-miR-153-3p (miRNA-mRNA) ENSMUSG00000056812" source="3048" target="3050" cy:directed="1"/>
      <edge id="40155" label="mmu-miR-153-3p (miRNA-mRNA) ENSMUSG00000047139" source="3048" target="774" cy:directed="1"/>
      <edge id="40154" label="mmu-miR-153-3p (miRNA-mRNA) ENSMUSG00000041220" source="3048" target="2899" cy:directed="1"/>
      <edge id="40153" label="mmu-miR-153-3p (miRNA-mRNA) ENSMUSG00000055214" source="3048" target="2196" cy:directed="1"/>
      <edge id="40152" label="mmu-miR-153-3p (miRNA-mRNA) ENSMUSG00000042523" source="3048" target="2014" cy:directed="1"/>
      <edge id="40151" label="mmu-miR-153-3p (miRNA-mRNA) ENSMUSG00000049858" source="3048" target="2127" cy:directed="1"/>
      <edge id="40150" label="mmu-miR-153-3p (miRNA-mRNA) ENSMUSG00000049044" source="3048" target="2120" cy:directed="1"/>
      <edge id="40149" label="mmu-miR-153-3p (miRNA-mRNA) ENSMUSG00000062078" source="3048" target="898" cy:directed="1"/>
      <edge id="40148" label="mmu-miR-153-3p (miRNA-mRNA) ENSMUSG00000046613" source="3048" target="2073" cy:directed="1"/>
      <edge id="40147" label="mmu-miR-153-3p (miRNA-mRNA) ENSMUSG00000041992" source="3048" target="2512" cy:directed="1"/>
      <edge id="40146" label="mmu-miR-153-3p (miRNA-mRNA) ENSMUSG00000060301" source="3048" target="888" cy:directed="1"/>
      <edge id="40145" label="mmu-miR-153-3p (miRNA-mRNA) ENSMUSG00000055745" source="3048" target="855" cy:directed="1"/>
      <edge id="40144" label="mmu-miR-153-3p (miRNA-mRNA) ENSMUSG00000048279" source="3048" target="2107" cy:directed="1"/>
      <edge id="40143" label="mmu-miR-153-3p (miRNA-mRNA) ENSMUSG00000048373" source="3048" target="2109" cy:directed="1"/>
      <edge id="40142" label="mmu-miR-153-3p (miRNA-mRNA) ENSMUSG00000050148" source="3048" target="809" cy:directed="1"/>
      <edge id="40141" label="mmu-miR-153-3p (miRNA-mRNA) ENSMUSG00000052727" source="3048" target="2929" cy:directed="1"/>
      <edge id="40140" label="mmu-miR-153-3p (miRNA-mRNA) ENSMUSG00000058706" source="3048" target="2998" cy:directed="1"/>
      <edge id="40139" label="mmu-miR-153-3p (miRNA-mRNA) ENSMUSG00000055538" source="3048" target="2200" cy:directed="1"/>
      <edge id="40138" label="mmu-miR-153-3p (miRNA-mRNA) ENSMUSG00000042035" source="3048" target="716" cy:directed="1"/>
      <edge id="40137" label="mmu-miR-153-3p (miRNA-mRNA) ENSMUSG00000040209" source="3048" target="681" cy:directed="1"/>
      <edge id="40136" label="mmu-miR-153-3p (miRNA-mRNA) ENSMUSG00000051951" source="3048" target="2564" cy:directed="1"/>
      <edge id="40135" label="mmu-miR-153-3p (miRNA-mRNA) ENSMUSG00000050556" source="3048" target="2620" cy:directed="1"/>
      <edge id="40134" label="mmu-miR-153-3p (miRNA-mRNA) ENSMUSG00000059742" source="3048" target="1062" cy:directed="1"/>
      <edge id="40133" label="mmu-miR-153-3p (miRNA-mRNA) ENSMUSG00000060961" source="3048" target="2254" cy:directed="1"/>
      <edge id="40132" label="mmu-miR-153-3p (miRNA-mRNA) ENSMUSG00000037736" source="3048" target="1894" cy:directed="1"/>
      <edge id="40131" label="mmu-miR-153-3p (miRNA-mRNA) ENSMUSG00000031647" source="3048" target="513" cy:directed="1"/>
      <edge id="40130" label="mmu-miR-153-3p (miRNA-mRNA) ENSMUSG00000034573" source="3048" target="579" cy:directed="1"/>
      <edge id="40129" label="mmu-miR-153-3p (miRNA-mRNA) ENSMUSG00000032883" source="3048" target="550" cy:directed="1"/>
      <edge id="40128" label="mmu-miR-153-3p (miRNA-mRNA) ENSMUSG00000031327" source="3048" target="1708" cy:directed="1"/>
      <edge id="40127" label="mmu-miR-153-3p (miRNA-mRNA) ENSMUSG00000035967" source="3048" target="1853" cy:directed="1"/>
      <edge id="40126" label="mmu-miR-153-3p (miRNA-mRNA) ENSMUSG00000037712" source="3048" target="636" cy:directed="1"/>
      <edge id="40125" label="mmu-miR-153-3p (miRNA-mRNA) ENSMUSG00000032549" source="3048" target="1776" cy:directed="1"/>
      <edge id="40124" label="mmu-miR-153-3p (miRNA-mRNA) ENSMUSG00000038555" source="3048" target="1914" cy:directed="1"/>
      <edge id="40123" label="mmu-miR-153-3p (miRNA-mRNA) ENSMUSG00000030353" source="3048" target="1681" cy:directed="1"/>
      <edge id="40122" label="mmu-miR-153-3p (miRNA-mRNA) ENSMUSG00000031762" source="3048" target="3049" cy:directed="1"/>
      <edge id="40121" label="mmu-miR-153-3p (miRNA-mRNA) ENSMUSG00000036902" source="3048" target="2987" cy:directed="1"/>
      <edge id="40120" label="mmu-miR-153-3p (miRNA-mRNA) ENSMUSG00000034663" source="3048" target="1823" cy:directed="1"/>
      <edge id="40119" label="mmu-miR-153-3p (miRNA-mRNA) ENSMUSG00000037852" source="3048" target="639" cy:directed="1"/>
      <edge id="40118" label="mmu-miR-153-3p (miRNA-mRNA) ENSMUSG00000031442" source="3048" target="2868" cy:directed="1"/>
      <edge id="40117" label="mmu-miR-153-3p (miRNA-mRNA) ENSMUSG00000032902" source="3048" target="1787" cy:directed="1"/>
      <edge id="40116" label="mmu-miR-153-3p (miRNA-mRNA) ENSMUSG00000032854" source="3048" target="549" cy:directed="1"/>
      <edge id="40115" label="mmu-miR-153-3p (miRNA-mRNA) ENSMUSG00000031207" source="3048" target="1704" cy:directed="1"/>
      <edge id="40114" label="mmu-miR-153-3p (miRNA-mRNA) ENSMUSG00000031502" source="3048" target="2952" cy:directed="1"/>
      <edge id="40113" label="mmu-miR-153-3p (miRNA-mRNA) ENSMUSG00000031749" source="3048" target="3006" cy:directed="1"/>
      <edge id="40112" label="mmu-miR-153-3p (miRNA-mRNA) ENSMUSG00000037493" source="3048" target="1888" cy:directed="1"/>
      <edge id="40111" label="mmu-miR-153-3p (miRNA-mRNA) ENSMUSG00000036745" source="3048" target="607" cy:directed="1"/>
      <edge id="40110" label="mmu-miR-153-3p (miRNA-mRNA) ENSMUSG00000034701" source="3048" target="2617" cy:directed="1"/>
      <edge id="40109" label="mmu-miR-153-3p (miRNA-mRNA) ENSMUSG00000038255" source="3048" target="1044" cy:directed="1"/>
      <edge id="40108" label="mmu-miR-153-3p (miRNA-mRNA) ENSMUSG00000031902" source="3048" target="1740" cy:directed="1"/>
      <edge id="40107" label="mmu-miR-153-3p (miRNA-mRNA) ENSMUSG00000033209" source="3048" target="557" cy:directed="1"/>
      <edge id="40106" label="mmu-miR-153-3p (miRNA-mRNA) ENSMUSG00000028517" source="3048" target="441" cy:directed="1"/>
      <edge id="40105" label="mmu-miR-153-3p (miRNA-mRNA) ENSMUSG00000025738" source="3048" target="2941" cy:directed="1"/>
      <edge id="40104" label="mmu-miR-153-3p (miRNA-mRNA) ENSMUSG00000028519" source="3048" target="1613" cy:directed="1"/>
      <edge id="40103" label="mmu-miR-153-3p (miRNA-mRNA) ENSMUSG00000027406" source="3048" target="1566" cy:directed="1"/>
      <edge id="40102" label="mmu-miR-153-3p (miRNA-mRNA) ENSMUSG00000025037" source="3048" target="354" cy:directed="1"/>
      <edge id="40101" label="mmu-miR-153-3p (miRNA-mRNA) ENSMUSG00000026235" source="3048" target="2648" cy:directed="1"/>
      <edge id="40100" label="mmu-miR-153-3p (miRNA-mRNA) ENSMUSG00000024302" source="3048" target="1419" cy:directed="1"/>
      <edge id="40099" label="mmu-miR-153-3p (miRNA-mRNA) ENSMUSG00000026764" source="3048" target="1022" cy:directed="1"/>
      <edge id="40098" label="mmu-miR-153-3p (miRNA-mRNA) ENSMUSG00000030102" source="3048" target="1674" cy:directed="1"/>
      <edge id="40097" label="mmu-miR-153-3p (miRNA-mRNA) ENSMUSG00000027200" source="3048" target="1554" cy:directed="1"/>
      <edge id="40096" label="mmu-miR-153-3p (miRNA-mRNA) ENSMUSG00000023036" source="3048" target="2864" cy:directed="1"/>
      <edge id="40095" label="mmu-miR-153-3p (miRNA-mRNA) ENSMUSG00000027438" source="3048" target="1568" cy:directed="1"/>
      <edge id="40094" label="mmu-miR-153-3p (miRNA-mRNA) ENSMUSG00000029761" source="3048" target="1662" cy:directed="1"/>
      <edge id="40093" label="mmu-miR-153-3p (miRNA-mRNA) ENSMUSG00000025867" source="3048" target="1497" cy:directed="1"/>
      <edge id="40092" label="mmu-miR-153-3p (miRNA-mRNA) ENSMUSG00000028518" source="3048" target="1612" cy:directed="1"/>
      <edge id="40091" label="mmu-miR-153-3p (miRNA-mRNA) ENSMUSG00000029121" source="3048" target="1629" cy:directed="1"/>
      <edge id="40090" label="mmu-miR-153-3p (miRNA-mRNA) ENSMUSG00000029661" source="3048" target="1658" cy:directed="1"/>
      <edge id="40089" label="mmu-miR-153-3p (miRNA-mRNA) ENSMUSG00000024411" source="3048" target="1424" cy:directed="1"/>
      <edge id="40088" label="mmu-miR-153-3p (miRNA-mRNA) ENSMUSG00000029167" source="3048" target="82" cy:directed="1"/>
      <edge id="40087" label="mmu-miR-153-3p (miRNA-mRNA) ENSMUSG00000026833" source="3048" target="1543" cy:directed="1"/>
      <edge id="40086" label="mmu-miR-153-3p (miRNA-mRNA) ENSMUSG00000029033" source="3048" target="2979" cy:directed="1"/>
      <edge id="40085" label="mmu-miR-153-3p (miRNA-mRNA) ENSMUSG00000027273" source="3048" target="1025" cy:directed="1"/>
      <edge id="40084" label="mmu-miR-153-3p (miRNA-mRNA) ENSMUSG00000010175" source="3048" target="72" cy:directed="1"/>
      <edge id="40083" label="mmu-miR-153-3p (miRNA-mRNA) ENSMUSG00000022037" source="3048" target="1349" cy:directed="1"/>
      <edge id="40082" label="mmu-miR-153-3p (miRNA-mRNA) ENSMUSG00000015222" source="3048" target="1227" cy:directed="1"/>
      <edge id="40081" label="mmu-miR-153-3p (miRNA-mRNA) ENSMUSG00000020044" source="3048" target="2894" cy:directed="1"/>
      <edge id="40080" label="mmu-miR-153-3p (miRNA-mRNA) ENSMUSG00000000416" source="3048" target="1135" cy:directed="1"/>
      <edge id="40079" label="mmu-miR-153-3p (miRNA-mRNA) ENSMUSG00000002265" source="3048" target="994" cy:directed="1"/>
      <edge id="40078" label="mmu-miR-153-3p (miRNA-mRNA) ENSMUSG00000018501" source="3048" target="84" cy:directed="1"/>
      <edge id="40077" label="mmu-miR-153-3p (miRNA-mRNA) ENSMUSG00000002107" source="3048" target="1161" cy:directed="1"/>
      <edge id="40076" label="mmu-miR-153-3p (miRNA-mRNA) ENSMUSG00000002341" source="3048" target="1162" cy:directed="1"/>
      <edge id="40075" label="mmu-miR-153-3p (miRNA-mRNA) ENSMUSG00000006356" source="3048" target="2478" cy:directed="1"/>
      <edge id="40074" label="mmu-miR-153-3p (miRNA-mRNA) ENSMUSG00000020894" source="3048" target="247" cy:directed="1"/>
      <edge id="40073" label="mmu-miR-153-3p (miRNA-mRNA) ENSMUSG00000022262" source="3048" target="1358" cy:directed="1"/>
      <edge id="40072" label="mmu-miR-153-3p (miRNA-mRNA) ENSMUSG00000022477" source="3048" target="1364" cy:directed="1"/>
      <edge id="40071" label="mmu-miR-153-3p (miRNA-mRNA) ENSMUSG00000010307" source="3048" target="2482" cy:directed="1"/>
      <edge id="40070" label="mmu-miR-153-3p (miRNA-mRNA) ENSMUSG00000021066" source="3048" target="2937" cy:directed="1"/>
      <edge id="40069" label="mmu-miR-153-3p (miRNA-mRNA) ENSMUSG00000017390" source="3048" target="2483" cy:directed="1"/>
      <edge id="40068" label="mmu-miR-153-3p (miRNA-mRNA) ENSMUSG00000009394" source="3048" target="2933" cy:directed="1"/>
      <edge id="40067" label="mmu-miR-153-3p (miRNA-mRNA) ENSMUSG00000018846" source="3048" target="1253" cy:directed="1"/>
      <edge id="40066" label="mmu-miR-153-3p (miRNA-mRNA) ENSMUSG00000007989" source="3048" target="162" cy:directed="1"/>
      <edge id="40065" label="mmu-miR-375-3p (miRNA-mRNA) ENSMUSG00000022995" source="3037" target="302" cy:directed="1"/>
      <edge id="40064" label="mmu-miR-1981-5p (miRNA-mRNA) ENSMUSG00000001517" source="3000" target="987" cy:directed="1"/>
      <edge id="40063" label="mmu-miR-1981-5p (miRNA-mRNA) ENSMUSG00000099689" source="3000" target="982" cy:directed="1"/>
      <edge id="40062" label="mmu-miR-298-5p (miRNA-mRNA) ENSMUSG00000024590" source="2931" target="336" cy:directed="1"/>
      <edge id="40061" label="mmu-miR-350-5p (miRNA-mRNA) ENSMUSG00000030103" source="2843" target="2625" cy:directed="1"/>
      <edge id="40060" label="mmu-miR-350-5p (miRNA-mRNA) ENSMUSG00000026621" source="2843" target="1533" cy:directed="1"/>
      <edge id="40059" label="mmu-miR-350-5p (miRNA-mRNA) ENSMUSG00000026198" source="2843" target="3023" cy:directed="1"/>
      <edge id="40058" label="mmu-miR-350-5p (miRNA-mRNA) ENSMUSG00000026398" source="2843" target="106" cy:directed="1"/>
      <edge id="40057" label="mmu-miR-350-5p (miRNA-mRNA) ENSMUSG00000026417" source="2843" target="1524" cy:directed="1"/>
      <edge id="40056" label="mmu-miR-350-5p (miRNA-mRNA) ENSMUSG00000028557" source="2843" target="443" cy:directed="1"/>
      <edge id="40055" label="mmu-miR-350-5p (miRNA-mRNA) ENSMUSG00000021069" source="2843" target="3022" cy:directed="1"/>
      <edge id="40054" label="mmu-miR-350-5p (miRNA-mRNA) ENSMUSG00000021213" source="2843" target="1319" cy:directed="1"/>
      <edge id="40053" label="mmu-miR-350-5p (miRNA-mRNA) ENSMUSG00000030087" source="2843" target="480" cy:directed="1"/>
      <edge id="40052" label="mmu-miR-350-5p (miRNA-mRNA) ENSMUSG00000031767" source="2843" target="1730" cy:directed="1"/>
      <edge id="40051" label="mmu-miR-350-5p (miRNA-mRNA) ENSMUSG00000032204" source="2843" target="3021" cy:directed="1"/>
      <edge id="40050" label="mmu-miR-350-5p (miRNA-mRNA) ENSMUSG00000021876" source="2843" target="269" cy:directed="1"/>
      <edge id="40049" label="mmu-miR-350-5p (miRNA-mRNA) ENSMUSG00000037818" source="2843" target="2906" cy:directed="1"/>
      <edge id="40048" label="mmu-miR-350-5p (miRNA-mRNA) ENSMUSG00000024292" source="2843" target="1418" cy:directed="1"/>
      <edge id="40047" label="mmu-miR-350-5p (miRNA-mRNA) ENSMUSG00000005949" source="2843" target="999" cy:directed="1"/>
      <edge id="40046" label="mmu-miR-350-5p (miRNA-mRNA) ENSMUSG00000034349" source="2843" target="2459" cy:directed="1"/>
      <edge id="40045" label="mmu-miR-350-5p (miRNA-mRNA) ENSMUSG00000037071" source="2843" target="616" cy:directed="1"/>
      <edge id="40044" label="mmu-miR-350-5p (miRNA-mRNA) ENSMUSG00000028211" source="2843" target="432" cy:directed="1"/>
      <edge id="40043" label="mmu-miR-350-5p (miRNA-mRNA) ENSMUSG00000033308" source="2843" target="1796" cy:directed="1"/>
      <edge id="40042" label="mmu-miR-350-5p (miRNA-mRNA) ENSMUSG00000020715" source="2843" target="240" cy:directed="1"/>
      <edge id="40041" label="mmu-miR-350-5p (miRNA-mRNA) ENSMUSG00000016534" source="2843" target="1235" cy:directed="1"/>
      <edge id="40040" label="mmu-miR-350-5p (miRNA-mRNA) ENSMUSG00000037541" source="2843" target="1889" cy:directed="1"/>
      <edge id="40039" label="mmu-miR-350-5p (miRNA-mRNA) ENSMUSG00000018846" source="2843" target="1253" cy:directed="1"/>
      <edge id="40038" label="mmu-miR-31-3p (miRNA-mRNA) ENSMUSG00000044807" source="2842" target="2049" cy:directed="1"/>
      <edge id="40037" label="mmu-miR-31-3p (miRNA-mRNA) ENSMUSG00000042686" source="2842" target="2016" cy:directed="1"/>
      <edge id="40036" label="mmu-miR-31-3p (miRNA-mRNA) ENSMUSG00000048482" source="2842" target="2851" cy:directed="1"/>
      <edge id="40035" label="mmu-miR-31-3p (miRNA-mRNA) ENSMUSG00000043542" source="2842" target="738" cy:directed="1"/>
      <edge id="40034" label="mmu-miR-31-3p (miRNA-mRNA) ENSMUSG00000048232" source="2842" target="2106" cy:directed="1"/>
      <edge id="40033" label="mmu-miR-31-3p (miRNA-mRNA) ENSMUSG00000053580" source="2842" target="837" cy:directed="1"/>
      <edge id="40032" label="mmu-miR-31-3p (miRNA-mRNA) ENSMUSG00000050064" source="2842" target="807" cy:directed="1"/>
      <edge id="40031" label="mmu-miR-31-3p (miRNA-mRNA) ENSMUSG00000045838" source="2842" target="1053" cy:directed="1"/>
      <edge id="40030" label="mmu-miR-31-3p (miRNA-mRNA) ENSMUSG00000050965" source="2842" target="2850" cy:directed="1"/>
      <edge id="40029" label="mmu-miR-31-3p (miRNA-mRNA) ENSMUSG00000041570" source="2842" target="710" cy:directed="1"/>
      <edge id="40028" label="mmu-miR-31-3p (miRNA-mRNA) ENSMUSG00000043154" source="2842" target="735" cy:directed="1"/>
      <edge id="40027" label="mmu-miR-31-3p (miRNA-mRNA) ENSMUSG00000052105" source="2842" target="824" cy:directed="1"/>
      <edge id="40026" label="mmu-miR-31-3p (miRNA-mRNA) ENSMUSG00000050240" source="2842" target="2133" cy:directed="1"/>
      <edge id="40025" label="mmu-miR-31-3p (miRNA-mRNA) ENSMUSG00000047747" source="2842" target="779" cy:directed="1"/>
      <edge id="40024" label="mmu-miR-31-3p (miRNA-mRNA) ENSMUSG00000047910" source="2842" target="2849" cy:directed="1"/>
      <edge id="40023" label="mmu-miR-31-3p (miRNA-mRNA) ENSMUSG00000052353" source="2842" target="2160" cy:directed="1"/>
      <edge id="40022" label="mmu-miR-31-3p (miRNA-mRNA) ENSMUSG00000042851" source="2842" target="2848" cy:directed="1"/>
      <edge id="40021" label="mmu-miR-31-3p (miRNA-mRNA) ENSMUSG00000032898" source="2842" target="2677" cy:directed="1"/>
      <edge id="40020" label="mmu-miR-31-3p (miRNA-mRNA) ENSMUSG00000040351" source="2842" target="684" cy:directed="1"/>
      <edge id="40019" label="mmu-miR-31-3p (miRNA-mRNA) ENSMUSG00000032531" source="2842" target="539" cy:directed="1"/>
      <edge id="40018" label="mmu-miR-31-3p (miRNA-mRNA) ENSMUSG00000037972" source="2842" target="642" cy:directed="1"/>
      <edge id="40017" label="mmu-miR-31-3p (miRNA-mRNA) ENSMUSG00000039601" source="2842" target="1946" cy:directed="1"/>
      <edge id="40016" label="mmu-miR-31-3p (miRNA-mRNA) ENSMUSG00000033581" source="2842" target="1801" cy:directed="1"/>
      <edge id="40015" label="mmu-miR-31-3p (miRNA-mRNA) ENSMUSG00000034401" source="2842" target="1126" cy:directed="1"/>
      <edge id="40014" label="mmu-miR-31-3p (miRNA-mRNA) ENSMUSG00000039158" source="2842" target="1934" cy:directed="1"/>
      <edge id="40013" label="mmu-miR-31-3p (miRNA-mRNA) ENSMUSG00000034463" source="2842" target="2563" cy:directed="1"/>
      <edge id="40012" label="mmu-miR-31-3p (miRNA-mRNA) ENSMUSG00000034573" source="2842" target="579" cy:directed="1"/>
      <edge id="40011" label="mmu-miR-31-3p (miRNA-mRNA) ENSMUSG00000034724" source="2842" target="1826" cy:directed="1"/>
      <edge id="40010" label="mmu-miR-31-3p (miRNA-mRNA) ENSMUSG00000035954" source="2842" target="2847" cy:directed="1"/>
      <edge id="40009" label="mmu-miR-31-3p (miRNA-mRNA) ENSMUSG00000033416" source="2842" target="2846" cy:directed="1"/>
      <edge id="40008" label="mmu-miR-31-3p (miRNA-mRNA) ENSMUSG00000038280" source="2842" target="2661" cy:directed="1"/>
      <edge id="40007" label="mmu-miR-31-3p (miRNA-mRNA) ENSMUSG00000035158" source="2842" target="99" cy:directed="1"/>
      <edge id="40006" label="mmu-miR-31-3p (miRNA-mRNA) ENSMUSG00000026657" source="2842" target="2454" cy:directed="1"/>
      <edge id="40005" label="mmu-miR-31-3p (miRNA-mRNA) ENSMUSG00000027254" source="2842" target="1024" cy:directed="1"/>
      <edge id="40004" label="mmu-miR-31-3p (miRNA-mRNA) ENSMUSG00000028517" source="2842" target="441" cy:directed="1"/>
      <edge id="40003" label="mmu-miR-31-3p (miRNA-mRNA) ENSMUSG00000025352" source="2842" target="360" cy:directed="1"/>
      <edge id="40002" label="mmu-miR-31-3p (miRNA-mRNA) ENSMUSG00000022637" source="2842" target="292" cy:directed="1"/>
      <edge id="40001" label="mmu-miR-31-3p (miRNA-mRNA) ENSMUSG00000025402" source="2842" target="1111" cy:directed="1"/>
      <edge id="40000" label="mmu-miR-31-3p (miRNA-mRNA) ENSMUSG00000025151" source="2842" target="1464" cy:directed="1"/>
      <edge id="39999" label="mmu-miR-31-3p (miRNA-mRNA) ENSMUSG00000025085" source="2842" target="1460" cy:directed="1"/>
      <edge id="39998" label="mmu-miR-31-3p (miRNA-mRNA) ENSMUSG00000022094" source="2842" target="275" cy:directed="1"/>
      <edge id="39997" label="mmu-miR-31-3p (miRNA-mRNA) ENSMUSG00000024302" source="2842" target="1419" cy:directed="1"/>
      <edge id="39996" label="mmu-miR-31-3p (miRNA-mRNA) ENSMUSG00000026586" source="2842" target="1532" cy:directed="1"/>
      <edge id="39995" label="mmu-miR-31-3p (miRNA-mRNA) ENSMUSG00000022358" source="2842" target="2845" cy:directed="1"/>
      <edge id="39994" label="mmu-miR-31-3p (miRNA-mRNA) ENSMUSG00000026235" source="2842" target="2648" cy:directed="1"/>
      <edge id="39993" label="mmu-miR-31-3p (miRNA-mRNA) ENSMUSG00000023961" source="2842" target="319" cy:directed="1"/>
      <edge id="39992" label="mmu-miR-31-3p (miRNA-mRNA) ENSMUSG00000026223" source="2842" target="1512" cy:directed="1"/>
      <edge id="39991" label="mmu-miR-31-3p (miRNA-mRNA) ENSMUSG00000026107" source="2842" target="380" cy:directed="1"/>
      <edge id="39990" label="mmu-miR-31-3p (miRNA-mRNA) ENSMUSG00000019647" source="2842" target="213" cy:directed="1"/>
      <edge id="39989" label="mmu-miR-31-3p (miRNA-mRNA) ENSMUSG00000008734" source="2842" target="164" cy:directed="1"/>
      <edge id="39988" label="mmu-miR-31-3p (miRNA-mRNA) ENSMUSG00000004768" source="2842" target="141" cy:directed="1"/>
      <edge id="39987" label="mmu-miR-31-3p (miRNA-mRNA) ENSMUSG00000014846" source="2842" target="1224" cy:directed="1"/>
      <edge id="39986" label="mmu-miR-31-3p (miRNA-mRNA) ENSMUSG00000000628" source="2842" target="1136" cy:directed="1"/>
      <edge id="39985" label="mmu-miR-31-3p (miRNA-mRNA) ENSMUSG00000018143" source="2842" target="1244" cy:directed="1"/>
      <edge id="39984" label="mmu-miR-31-3p (miRNA-mRNA) ENSMUSG00000018042" source="2842" target="201" cy:directed="1"/>
      <edge id="39983" label="mmu-miR-31-3p (miRNA-mRNA) ENSMUSG00000013076" source="2842" target="2844" cy:directed="1"/>
      <edge id="39982" label="mmu-miR-31-3p (miRNA-mRNA) ENSMUSG00000019124" source="2842" target="1259" cy:directed="1"/>
      <edge id="39981" label="mmu-miR-31-3p (miRNA-mRNA) ENSMUSG00000020402" source="2842" target="1289" cy:directed="1"/>
      <edge id="39980" label="mmu-miR-31-3p (miRNA-mRNA) ENSMUSG00000019843" source="2842" target="1265" cy:directed="1"/>
      <edge id="39979" label="mmu-miR-31-3p (miRNA-mRNA) ENSMUSG00000017667" source="2842" target="1240" cy:directed="1"/>
      <edge id="39978" label="mmu-miR-30b-5p (miRNA-mRNA) ENSMUSG00000054920" source="2841" target="2190" cy:directed="1"/>
      <edge id="39977" label="mmu-miR-30b-5p (miRNA-mRNA) ENSMUSG00000058454" source="2841" target="875" cy:directed="1"/>
      <edge id="39976" label="mmu-miR-30b-5p (miRNA-mRNA) ENSMUSG00000058952" source="2841" target="2237" cy:directed="1"/>
      <edge id="39975" label="mmu-miR-30b-5p (miRNA-mRNA) ENSMUSG00000064262" source="2841" target="913" cy:directed="1"/>
      <edge id="39974" label="mmu-miR-30b-5p (miRNA-mRNA) ENSMUSG00000064225" source="2841" target="2282" cy:directed="1"/>
      <edge id="39973" label="mmu-miR-30b-5p (miRNA-mRNA) ENSMUSG00000061959" source="2841" target="2262" cy:directed="1"/>
      <edge id="39972" label="mmu-miR-30b-5p (miRNA-mRNA) ENSMUSG00000067279" source="2841" target="918" cy:directed="1"/>
      <edge id="39971" label="mmu-miR-30b-5p (miRNA-mRNA) ENSMUSG00000053617" source="2841" target="2175" cy:directed="1"/>
      <edge id="39970" label="mmu-miR-30b-5p (miRNA-mRNA) ENSMUSG00000054484" source="2841" target="1104" cy:directed="1"/>
      <edge id="39969" label="mmu-miR-30b-5p (miRNA-mRNA) ENSMUSG00000053470" source="2841" target="836" cy:directed="1"/>
      <edge id="39968" label="mmu-miR-30b-5p (miRNA-mRNA) ENSMUSG00000052684" source="2841" target="90" cy:directed="1"/>
      <edge id="39967" label="mmu-miR-30b-5p (miRNA-mRNA) ENSMUSG00000055538" source="2841" target="2200" cy:directed="1"/>
      <edge id="39966" label="mmu-miR-30b-5p (miRNA-mRNA) ENSMUSG00000060733" source="2841" target="891" cy:directed="1"/>
      <edge id="39965" label="mmu-miR-30b-5p (miRNA-mRNA) ENSMUSG00000057963" source="2841" target="3061" cy:directed="1"/>
      <edge id="39964" label="mmu-miR-30b-5p (miRNA-mRNA) ENSMUSG00000057335" source="2841" target="869" cy:directed="1"/>
      <edge id="39963" label="mmu-miR-30b-5p (miRNA-mRNA) ENSMUSG00000054115" source="2841" target="2619" cy:directed="1"/>
      <edge id="39962" label="mmu-miR-30b-5p (miRNA-mRNA) ENSMUSG00000057880" source="2841" target="2229" cy:directed="1"/>
      <edge id="39961" label="mmu-miR-30b-5p (miRNA-mRNA) ENSMUSG00000041642" source="2841" target="2883" cy:directed="1"/>
      <edge id="39960" label="mmu-miR-30b-5p (miRNA-mRNA) ENSMUSG00000042213" source="2841" target="722" cy:directed="1"/>
      <edge id="39959" label="mmu-miR-30b-5p (miRNA-mRNA) ENSMUSG00000050270" source="2841" target="2134" cy:directed="1"/>
      <edge id="39958" label="mmu-miR-30b-5p (miRNA-mRNA) ENSMUSG00000048279" source="2841" target="2107" cy:directed="1"/>
      <edge id="39957" label="mmu-miR-30b-5p (miRNA-mRNA) ENSMUSG00000042842" source="2841" target="2022" cy:directed="1"/>
      <edge id="39956" label="mmu-miR-30b-5p (miRNA-mRNA) ENSMUSG00000041570" source="2841" target="710" cy:directed="1"/>
      <edge id="39955" label="mmu-miR-30b-5p (miRNA-mRNA) ENSMUSG00000045316" source="2841" target="3060" cy:directed="1"/>
      <edge id="39954" label="mmu-miR-30b-5p (miRNA-mRNA) ENSMUSG00000050965" source="2841" target="2850" cy:directed="1"/>
      <edge id="39953" label="mmu-miR-30b-5p (miRNA-mRNA) ENSMUSG00000047963" source="2841" target="2099" cy:directed="1"/>
      <edge id="39952" label="mmu-miR-30b-5p (miRNA-mRNA) ENSMUSG00000050473" source="2841" target="2645" cy:directed="1"/>
      <edge id="39951" label="mmu-miR-30b-5p (miRNA-mRNA) ENSMUSG00000042834" source="2841" target="2576" cy:directed="1"/>
      <edge id="39950" label="mmu-miR-30b-5p (miRNA-mRNA) ENSMUSG00000050953" source="2841" target="816" cy:directed="1"/>
      <edge id="39949" label="mmu-miR-30b-5p (miRNA-mRNA) ENSMUSG00000049892" source="2841" target="2129" cy:directed="1"/>
      <edge id="39948" label="mmu-miR-30b-5p (miRNA-mRNA) ENSMUSG00000046546" source="2841" target="767" cy:directed="1"/>
      <edge id="39947" label="mmu-miR-30b-5p (miRNA-mRNA) ENSMUSG00000046447" source="2841" target="2070" cy:directed="1"/>
      <edge id="39946" label="mmu-miR-30b-5p (miRNA-mRNA) ENSMUSG00000039967" source="2841" target="1957" cy:directed="1"/>
      <edge id="39945" label="mmu-miR-30b-5p (miRNA-mRNA) ENSMUSG00000039158" source="2841" target="1934" cy:directed="1"/>
      <edge id="39944" label="mmu-miR-30b-5p (miRNA-mRNA) ENSMUSG00000039428" source="2841" target="2669" cy:directed="1"/>
      <edge id="39943" label="mmu-miR-30b-5p (miRNA-mRNA) ENSMUSG00000039031" source="2841" target="1929" cy:directed="1"/>
      <edge id="39942" label="mmu-miR-30b-5p (miRNA-mRNA) ENSMUSG00000039952" source="2841" target="1956" cy:directed="1"/>
      <edge id="39941" label="mmu-miR-30b-5p (miRNA-mRNA) ENSMUSG00000039530" source="2841" target="1945" cy:directed="1"/>
      <edge id="39940" label="mmu-miR-30b-5p (miRNA-mRNA) ENSMUSG00000037818" source="2841" target="2906" cy:directed="1"/>
      <edge id="39939" label="mmu-miR-30b-5p (miRNA-mRNA) ENSMUSG00000038332" source="2841" target="2879" cy:directed="1"/>
      <edge id="39938" label="mmu-miR-30b-5p (miRNA-mRNA) ENSMUSG00000040433" source="2841" target="687" cy:directed="1"/>
      <edge id="39937" label="mmu-miR-30b-5p (miRNA-mRNA) ENSMUSG00000040204" source="2841" target="3059" cy:directed="1"/>
      <edge id="39936" label="mmu-miR-30b-5p (miRNA-mRNA) ENSMUSG00000041268" source="2841" target="707" cy:directed="1"/>
      <edge id="39935" label="mmu-miR-30b-5p (miRNA-mRNA) ENSMUSG00000041040" source="2841" target="697" cy:directed="1"/>
      <edge id="39934" label="mmu-miR-30b-5p (miRNA-mRNA) ENSMUSG00000032898" source="2841" target="2677" cy:directed="1"/>
      <edge id="39933" label="mmu-miR-30b-5p (miRNA-mRNA) ENSMUSG00000034450" source="2841" target="1818" cy:directed="1"/>
      <edge id="39932" label="mmu-miR-30b-5p (miRNA-mRNA) ENSMUSG00000032531" source="2841" target="539" cy:directed="1"/>
      <edge id="39931" label="mmu-miR-30b-5p (miRNA-mRNA) ENSMUSG00000033416" source="2841" target="2846" cy:directed="1"/>
      <edge id="39930" label="mmu-miR-30b-5p (miRNA-mRNA) ENSMUSG00000032902" source="2841" target="1787" cy:directed="1"/>
      <edge id="39929" label="mmu-miR-30b-5p (miRNA-mRNA) ENSMUSG00000035105" source="2841" target="586" cy:directed="1"/>
      <edge id="39928" label="mmu-miR-30b-5p (miRNA-mRNA) ENSMUSG00000034640" source="2841" target="2907" cy:directed="1"/>
      <edge id="39927" label="mmu-miR-30b-5p (miRNA-mRNA) ENSMUSG00000033545" source="2841" target="1799" cy:directed="1"/>
      <edge id="39926" label="mmu-miR-30b-5p (miRNA-mRNA) ENSMUSG00000035451" source="2841" target="1840" cy:directed="1"/>
      <edge id="39925" label="mmu-miR-30b-5p (miRNA-mRNA) ENSMUSG00000034663" source="2841" target="1823" cy:directed="1"/>
      <edge id="39924" label="mmu-miR-30b-5p (miRNA-mRNA) ENSMUSG00000035954" source="2841" target="2847" cy:directed="1"/>
      <edge id="39923" label="mmu-miR-30b-5p (miRNA-mRNA) ENSMUSG00000034858" source="2841" target="1036" cy:directed="1"/>
      <edge id="39922" label="mmu-miR-30b-5p (miRNA-mRNA) ENSMUSG00000033871" source="2841" target="568" cy:directed="1"/>
      <edge id="39921" label="mmu-miR-30b-5p (miRNA-mRNA) ENSMUSG00000030103" source="2841" target="2625" cy:directed="1"/>
      <edge id="39920" label="mmu-miR-30b-5p (miRNA-mRNA) ENSMUSG00000029859" source="2841" target="3058" cy:directed="1"/>
      <edge id="39919" label="mmu-miR-30b-5p (miRNA-mRNA) ENSMUSG00000029084" source="2841" target="1118" cy:directed="1"/>
      <edge id="39918" label="mmu-miR-30b-5p (miRNA-mRNA) ENSMUSG00000031765" source="2841" target="1729" cy:directed="1"/>
      <edge id="39917" label="mmu-miR-30b-5p (miRNA-mRNA) ENSMUSG00000032035" source="2841" target="109" cy:directed="1"/>
      <edge id="39916" label="mmu-miR-30b-5p (miRNA-mRNA) ENSMUSG00000029761" source="2841" target="1662" cy:directed="1"/>
      <edge id="39915" label="mmu-miR-30b-5p (miRNA-mRNA) ENSMUSG00000028943" source="2841" target="456" cy:directed="1"/>
      <edge id="39914" label="mmu-miR-30b-5p (miRNA-mRNA) ENSMUSG00000030207" source="2841" target="2867" cy:directed="1"/>
      <edge id="39913" label="mmu-miR-30b-5p (miRNA-mRNA) ENSMUSG00000030004" source="2841" target="1672" cy:directed="1"/>
      <edge id="39912" label="mmu-miR-30b-5p (miRNA-mRNA) ENSMUSG00000030867" source="2841" target="3027" cy:directed="1"/>
      <edge id="39911" label="mmu-miR-30b-5p (miRNA-mRNA) ENSMUSG00000032218" source="2841" target="1757" cy:directed="1"/>
      <edge id="39910" label="mmu-miR-30b-5p (miRNA-mRNA) ENSMUSG00000031877" source="2841" target="1736" cy:directed="1"/>
      <edge id="39909" label="mmu-miR-30b-5p (miRNA-mRNA) ENSMUSG00000029090" source="2841" target="3057" cy:directed="1"/>
      <edge id="39908" label="mmu-miR-30b-5p (miRNA-mRNA) ENSMUSG00000031827" source="2841" target="518" cy:directed="1"/>
      <edge id="39907" label="mmu-miR-30b-5p (miRNA-mRNA) ENSMUSG00000032238" source="2841" target="527" cy:directed="1"/>
      <edge id="39906" label="mmu-miR-30b-5p (miRNA-mRNA) ENSMUSG00000031902" source="2841" target="1740" cy:directed="1"/>
      <edge id="39905" label="mmu-miR-30b-5p (miRNA-mRNA) ENSMUSG00000027346" source="2841" target="1561" cy:directed="1"/>
      <edge id="39904" label="mmu-miR-30b-5p (miRNA-mRNA) ENSMUSG00000027306" source="2841" target="2903" cy:directed="1"/>
      <edge id="39903" label="mmu-miR-30b-5p (miRNA-mRNA) ENSMUSG00000028312" source="2841" target="435" cy:directed="1"/>
      <edge id="39902" label="mmu-miR-30b-5p (miRNA-mRNA) ENSMUSG00000026482" source="2841" target="386" cy:directed="1"/>
      <edge id="39901" label="mmu-miR-30b-5p (miRNA-mRNA) ENSMUSG00000027187" source="2841" target="406" cy:directed="1"/>
      <edge id="39900" label="mmu-miR-30b-5p (miRNA-mRNA) ENSMUSG00000027761" source="2841" target="2896" cy:directed="1"/>
      <edge id="39899" label="mmu-miR-30b-5p (miRNA-mRNA) ENSMUSG00000027200" source="2841" target="1554" cy:directed="1"/>
      <edge id="39898" label="mmu-miR-30b-5p (miRNA-mRNA) ENSMUSG00000026970" source="2841" target="1547" cy:directed="1"/>
      <edge id="39897" label="mmu-miR-30b-5p (miRNA-mRNA) ENSMUSG00000026395" source="2841" target="1521" cy:directed="1"/>
      <edge id="39896" label="mmu-miR-30b-5p (miRNA-mRNA) ENSMUSG00000028132" source="2841" target="1600" cy:directed="1"/>
      <edge id="39895" label="mmu-miR-30b-5p (miRNA-mRNA) ENSMUSG00000026848" source="2841" target="397" cy:directed="1"/>
      <edge id="39894" label="mmu-miR-30b-5p (miRNA-mRNA) ENSMUSG00000026017" source="2841" target="3056" cy:directed="1"/>
      <edge id="39893" label="mmu-miR-30b-5p (miRNA-mRNA) ENSMUSG00000026094" source="2841" target="1083" cy:directed="1"/>
      <edge id="39892" label="mmu-miR-30b-5p (miRNA-mRNA) ENSMUSG00000028211" source="2841" target="432" cy:directed="1"/>
      <edge id="39891" label="mmu-miR-30b-5p (miRNA-mRNA) ENSMUSG00000028634" source="2841" target="446" cy:directed="1"/>
      <edge id="39890" label="mmu-miR-30b-5p (miRNA-mRNA) ENSMUSG00000026873" source="2841" target="3055" cy:directed="1"/>
      <edge id="39889" label="mmu-miR-30b-5p (miRNA-mRNA) ENSMUSG00000026107" source="2841" target="380" cy:directed="1"/>
      <edge id="39888" label="mmu-miR-30b-5p (miRNA-mRNA) ENSMUSG00000028557" source="2841" target="443" cy:directed="1"/>
      <edge id="39887" label="mmu-miR-30b-5p (miRNA-mRNA) ENSMUSG00000028179" source="2841" target="2627" cy:directed="1"/>
      <edge id="39886" label="mmu-miR-30b-5p (miRNA-mRNA) ENSMUSG00000028403" source="2841" target="2430" cy:directed="1"/>
      <edge id="39885" label="mmu-miR-30b-5p (miRNA-mRNA) ENSMUSG00000028158" source="2841" target="1601" cy:directed="1"/>
      <edge id="39884" label="mmu-miR-30b-5p (miRNA-mRNA) ENSMUSG00000026737" source="2841" target="2575" cy:directed="1"/>
      <edge id="39883" label="mmu-miR-30b-5p (miRNA-mRNA) ENSMUSG00000025197" source="2841" target="1468" cy:directed="1"/>
      <edge id="39882" label="mmu-miR-30b-5p (miRNA-mRNA) ENSMUSG00000025198" source="2841" target="1469" cy:directed="1"/>
      <edge id="39881" label="mmu-miR-30b-5p (miRNA-mRNA) ENSMUSG00000024401" source="2841" target="2453" cy:directed="1"/>
      <edge id="39880" label="mmu-miR-30b-5p (miRNA-mRNA) ENSMUSG00000025791" source="2841" target="2917" cy:directed="1"/>
      <edge id="39879" label="mmu-miR-30b-5p (miRNA-mRNA) ENSMUSG00000025486" source="2841" target="3054" cy:directed="1"/>
      <edge id="39878" label="mmu-miR-30b-5p (miRNA-mRNA) ENSMUSG00000024304" source="2841" target="1420" cy:directed="1"/>
      <edge id="39877" label="mmu-miR-30b-5p (miRNA-mRNA) ENSMUSG00000023030" source="2841" target="2862" cy:directed="1"/>
      <edge id="39876" label="mmu-miR-30b-5p (miRNA-mRNA) ENSMUSG00000024431" source="2841" target="79" cy:directed="1"/>
      <edge id="39875" label="mmu-miR-30b-5p (miRNA-mRNA) ENSMUSG00000024423" source="2841" target="1426" cy:directed="1"/>
      <edge id="39874" label="mmu-miR-30b-5p (miRNA-mRNA) ENSMUSG00000024580" source="2841" target="3014" cy:directed="1"/>
      <edge id="39873" label="mmu-miR-30b-5p (miRNA-mRNA) ENSMUSG00000023050" source="2841" target="1391" cy:directed="1"/>
      <edge id="39872" label="mmu-miR-30b-5p (miRNA-mRNA) ENSMUSG00000022637" source="2841" target="292" cy:directed="1"/>
      <edge id="39871" label="mmu-miR-30b-5p (miRNA-mRNA) ENSMUSG00000024827" source="2841" target="1445" cy:directed="1"/>
      <edge id="39870" label="mmu-miR-30b-5p (miRNA-mRNA) ENSMUSG00000020532" source="2841" target="1112" cy:directed="1"/>
      <edge id="39869" label="mmu-miR-30b-5p (miRNA-mRNA) ENSMUSG00000020101" source="2841" target="2974" cy:directed="1"/>
      <edge id="39868" label="mmu-miR-30b-5p (miRNA-mRNA) ENSMUSG00000019942" source="2841" target="219" cy:directed="1"/>
      <edge id="39867" label="mmu-miR-30b-5p (miRNA-mRNA) ENSMUSG00000020402" source="2841" target="1289" cy:directed="1"/>
      <edge id="39866" label="mmu-miR-30b-5p (miRNA-mRNA) ENSMUSG00000020986" source="2841" target="1312" cy:directed="1"/>
      <edge id="39865" label="mmu-miR-30b-5p (miRNA-mRNA) ENSMUSG00000020978" source="2841" target="249" cy:directed="1"/>
      <edge id="39864" label="mmu-miR-30b-5p (miRNA-mRNA) ENSMUSG00000020009" source="2841" target="222" cy:directed="1"/>
      <edge id="39863" label="mmu-miR-30b-5p (miRNA-mRNA) ENSMUSG00000019843" source="2841" target="1265" cy:directed="1"/>
      <edge id="39862" label="mmu-miR-30b-5p (miRNA-mRNA) ENSMUSG00000021733" source="2841" target="1337" cy:directed="1"/>
      <edge id="39861" label="mmu-miR-30b-5p (miRNA-mRNA) ENSMUSG00000020493" source="2841" target="2582" cy:directed="1"/>
      <edge id="39860" label="mmu-miR-30b-5p (miRNA-mRNA) ENSMUSG00000020261" source="2841" target="1285" cy:directed="1"/>
      <edge id="39859" label="mmu-miR-30b-5p (miRNA-mRNA) ENSMUSG00000018983" source="2841" target="208" cy:directed="1"/>
      <edge id="39858" label="mmu-miR-30b-5p (miRNA-mRNA) ENSMUSG00000014361" source="2841" target="177" cy:directed="1"/>
      <edge id="39857" label="mmu-miR-30b-5p (miRNA-mRNA) ENSMUSG00000018906" source="2841" target="1255" cy:directed="1"/>
      <edge id="39856" label="mmu-miR-30b-5p (miRNA-mRNA) ENSMUSG00000014164" source="2841" target="1003" cy:directed="1"/>
      <edge id="39855" label="mmu-miR-30b-5p (miRNA-mRNA) ENSMUSG00000004270" source="2841" target="139" cy:directed="1"/>
      <edge id="39854" label="mmu-miR-30b-5p (miRNA-mRNA) ENSMUSG00000018899" source="2841" target="86" cy:directed="1"/>
      <edge id="39853" label="mmu-miR-30b-5p (miRNA-mRNA) ENSMUSG00000004038" source="2841" target="1176" cy:directed="1"/>
      <edge id="39852" label="mmu-miR-30b-5p (miRNA-mRNA) ENSMUSG00000001467" source="2841" target="1150" cy:directed="1"/>
      <edge id="39851" label="mmu-miR-30b-5p (miRNA-mRNA) ENSMUSG00000006494" source="2841" target="1001" cy:directed="1"/>
      <edge id="39850" label="mmu-miR-30b-5p (miRNA-mRNA) ENSMUSG00000016495" source="2841" target="3019" cy:directed="1"/>
      <edge id="39849" label="mmu-miR-30b-5p (miRNA-mRNA) ENSMUSG00000013160" source="2841" target="2607" cy:directed="1"/>
      <edge id="39848" label="mmu-miR-30b-5p (miRNA-mRNA) ENSMUSG00000018846" source="2841" target="1253" cy:directed="1"/>
      <edge id="39847" label="mmu-miR-30b-5p (miRNA-mRNA) ENSMUSG00000005268" source="2841" target="997" cy:directed="1"/>
      <edge id="39846" label="mmu-miR-129-5p (miRNA-mRNA) ENSMUSG00000020534" source="2840" target="1297" cy:directed="1"/>
      <edge id="39845" label="ENSMUSG00000075511 (lincRNA-miRNA) mmu-miR-27a-3p" source="2839" target="2838" cy:directed="1"/>
      <edge id="39844" label="mmu-miR-27a-3p (miRNA-mRNA) ENSMUSG00000068923" source="2838" target="2968" cy:directed="1"/>
      <edge id="39843" label="mmu-miR-27a-3p (miRNA-mRNA) ENSMUSG00000072849" source="2838" target="2327" cy:directed="1"/>
      <edge id="39842" label="mmu-miR-27a-3p (miRNA-mRNA) ENSMUSG00000079037" source="2838" target="1071" cy:directed="1"/>
      <edge id="39841" label="mmu-miR-27a-3p (miRNA-mRNA) ENSMUSG00000072115" source="2838" target="941" cy:directed="1"/>
      <edge id="39840" label="mmu-miR-27a-3p (miRNA-mRNA) ENSMUSG00000070802" source="2838" target="1070" cy:directed="1"/>
      <edge id="39839" label="mmu-miR-27a-3p (miRNA-mRNA) ENSMUSG00000075010" source="2838" target="2733" cy:directed="1"/>
      <edge id="39838" label="mmu-miR-27a-3p (miRNA-mRNA) ENSMUSG00000078672" source="2838" target="2439" cy:directed="1"/>
      <edge id="39837" label="mmu-miR-27a-3p (miRNA-mRNA) ENSMUSG00000079442" source="2838" target="965" cy:directed="1"/>
      <edge id="39836" label="mmu-miR-27a-3p (miRNA-mRNA) ENSMUSG00000073988" source="2838" target="949" cy:directed="1"/>
      <edge id="39835" label="mmu-miR-27a-3p (miRNA-mRNA) ENSMUSG00000078515" source="2838" target="2372" cy:directed="1"/>
      <edge id="39834" label="mmu-miR-27a-3p (miRNA-mRNA) ENSMUSG00000068742" source="2838" target="925" cy:directed="1"/>
      <edge id="39833" label="mmu-miR-27a-3p (miRNA-mRNA) ENSMUSG00000073409" source="2838" target="2331" cy:directed="1"/>
      <edge id="39832" label="mmu-miR-27a-3p (miRNA-mRNA) ENSMUSG00000070056" source="2838" target="2854" cy:directed="1"/>
      <edge id="39831" label="mmu-miR-27a-3p (miRNA-mRNA) ENSMUSG00000071226" source="2838" target="936" cy:directed="1"/>
      <edge id="39830" label="mmu-miR-27a-3p (miRNA-mRNA) ENSMUSG00000089774" source="2838" target="2967" cy:directed="1"/>
      <edge id="39829" label="mmu-miR-27a-3p (miRNA-mRNA) ENSMUSG00000066441" source="2838" target="2291" cy:directed="1"/>
      <edge id="39828" label="mmu-miR-27a-3p (miRNA-mRNA) ENSMUSG00000063889" source="2838" target="2909" cy:directed="1"/>
      <edge id="39827" label="mmu-miR-27a-3p (miRNA-mRNA) ENSMUSG00000063568" source="2838" target="2273" cy:directed="1"/>
      <edge id="39826" label="mmu-miR-27a-3p (miRNA-mRNA) ENSMUSG00000066152" source="2838" target="2287" cy:directed="1"/>
      <edge id="39825" label="mmu-miR-27a-3p (miRNA-mRNA) ENSMUSG00000061578" source="2838" target="895" cy:directed="1"/>
      <edge id="39824" label="mmu-miR-27a-3p (miRNA-mRNA) ENSMUSG00000062591" source="2838" target="2569" cy:directed="1"/>
      <edge id="39823" label="mmu-miR-27a-3p (miRNA-mRNA) ENSMUSG00000064373" source="2838" target="2285" cy:directed="1"/>
      <edge id="39822" label="mmu-miR-27a-3p (miRNA-mRNA) ENSMUSG00000063450" source="2838" target="1065" cy:directed="1"/>
      <edge id="39821" label="mmu-miR-27a-3p (miRNA-mRNA) ENSMUSG00000066800" source="2838" target="2293" cy:directed="1"/>
      <edge id="39820" label="mmu-miR-27a-3p (miRNA-mRNA) ENSMUSG00000064210" source="2838" target="2891" cy:directed="1"/>
      <edge id="39819" label="mmu-miR-27a-3p (miRNA-mRNA) ENSMUSG00000060301" source="2838" target="888" cy:directed="1"/>
      <edge id="39818" label="mmu-miR-27a-3p (miRNA-mRNA) ENSMUSG00000062078" source="2838" target="898" cy:directed="1"/>
      <edge id="39817" label="mmu-miR-27a-3p (miRNA-mRNA) ENSMUSG00000064225" source="2838" target="2282" cy:directed="1"/>
      <edge id="39816" label="mmu-miR-27a-3p (miRNA-mRNA) ENSMUSG00000054920" source="2838" target="2190" cy:directed="1"/>
      <edge id="39815" label="mmu-miR-27a-3p (miRNA-mRNA) ENSMUSG00000058672" source="2838" target="876" cy:directed="1"/>
      <edge id="39814" label="mmu-miR-27a-3p (miRNA-mRNA) ENSMUSG00000059213" source="2838" target="2966" cy:directed="1"/>
      <edge id="39813" label="mmu-miR-27a-3p (miRNA-mRNA) ENSMUSG00000056602" source="2838" target="1106" cy:directed="1"/>
      <edge id="39812" label="mmu-miR-27a-3p (miRNA-mRNA) ENSMUSG00000058297" source="2838" target="1060" cy:directed="1"/>
      <edge id="39811" label="mmu-miR-27a-3p (miRNA-mRNA) ENSMUSG00000058070" source="2838" target="872" cy:directed="1"/>
      <edge id="39810" label="mmu-miR-27a-3p (miRNA-mRNA) ENSMUSG00000058975" source="2838" target="877" cy:directed="1"/>
      <edge id="39809" label="mmu-miR-27a-3p (miRNA-mRNA) ENSMUSG00000057880" source="2838" target="2229" cy:directed="1"/>
      <edge id="39808" label="mmu-miR-27a-3p (miRNA-mRNA) ENSMUSG00000055980" source="2838" target="859" cy:directed="1"/>
      <edge id="39807" label="mmu-miR-27a-3p (miRNA-mRNA) ENSMUSG00000056296" source="2838" target="2208" cy:directed="1"/>
      <edge id="39806" label="mmu-miR-27a-3p (miRNA-mRNA) ENSMUSG00000055407" source="2838" target="2197" cy:directed="1"/>
      <edge id="39805" label="mmu-miR-27a-3p (miRNA-mRNA) ENSMUSG00000054469" source="2838" target="2185" cy:directed="1"/>
      <edge id="39804" label="mmu-miR-27a-3p (miRNA-mRNA) ENSMUSG00000055538" source="2838" target="2200" cy:directed="1"/>
      <edge id="39803" label="mmu-miR-27a-3p (miRNA-mRNA) ENSMUSG00000053046" source="2838" target="829" cy:directed="1"/>
      <edge id="39802" label="mmu-miR-27a-3p (miRNA-mRNA) ENSMUSG00000050556" source="2838" target="2620" cy:directed="1"/>
      <edge id="39801" label="mmu-miR-27a-3p (miRNA-mRNA) ENSMUSG00000051341" source="2838" target="2519" cy:directed="1"/>
      <edge id="39800" label="mmu-miR-27a-3p (miRNA-mRNA) ENSMUSG00000050965" source="2838" target="2850" cy:directed="1"/>
      <edge id="39799" label="mmu-miR-27a-3p (miRNA-mRNA) ENSMUSG00000050052" source="2838" target="2130" cy:directed="1"/>
      <edge id="39798" label="mmu-miR-27a-3p (miRNA-mRNA) ENSMUSG00000051177" source="2838" target="1058" cy:directed="1"/>
      <edge id="39797" label="mmu-miR-27a-3p (miRNA-mRNA) ENSMUSG00000051335" source="2838" target="2148" cy:directed="1"/>
      <edge id="39796" label="mmu-miR-27a-3p (miRNA-mRNA) ENSMUSG00000052727" source="2838" target="2929" cy:directed="1"/>
      <edge id="39795" label="mmu-miR-27a-3p (miRNA-mRNA) ENSMUSG00000050064" source="2838" target="807" cy:directed="1"/>
      <edge id="39794" label="mmu-miR-27a-3p (miRNA-mRNA) ENSMUSG00000051726" source="2838" target="2157" cy:directed="1"/>
      <edge id="39793" label="mmu-miR-27a-3p (miRNA-mRNA) ENSMUSG00000049866" source="2838" target="805" cy:directed="1"/>
      <edge id="39792" label="mmu-miR-27a-3p (miRNA-mRNA) ENSMUSG00000052353" source="2838" target="2160" cy:directed="1"/>
      <edge id="39791" label="mmu-miR-27a-3p (miRNA-mRNA) ENSMUSG00000053199" source="2838" target="832" cy:directed="1"/>
      <edge id="39790" label="mmu-miR-27a-3p (miRNA-mRNA) ENSMUSG00000049313" source="2838" target="1101" cy:directed="1"/>
      <edge id="39789" label="mmu-miR-27a-3p (miRNA-mRNA) ENSMUSG00000048988" source="2838" target="2118" cy:directed="1"/>
      <edge id="39788" label="mmu-miR-27a-3p (miRNA-mRNA) ENSMUSG00000048458" source="2838" target="790" cy:directed="1"/>
      <edge id="39787" label="mmu-miR-27a-3p (miRNA-mRNA) ENSMUSG00000048965" source="2838" target="793" cy:directed="1"/>
      <edge id="39786" label="mmu-miR-27a-3p (miRNA-mRNA) ENSMUSG00000047963" source="2838" target="2099" cy:directed="1"/>
      <edge id="39785" label="mmu-miR-27a-3p (miRNA-mRNA) ENSMUSG00000048148" source="2838" target="2104" cy:directed="1"/>
      <edge id="39784" label="mmu-miR-27a-3p (miRNA-mRNA) ENSMUSG00000048376" source="2838" target="787" cy:directed="1"/>
      <edge id="39783" label="mmu-miR-27a-3p (miRNA-mRNA) ENSMUSG00000047181" source="2838" target="2079" cy:directed="1"/>
      <edge id="39782" label="mmu-miR-27a-3p (miRNA-mRNA) ENSMUSG00000047867" source="2838" target="2097" cy:directed="1"/>
      <edge id="39781" label="mmu-miR-27a-3p (miRNA-mRNA) ENSMUSG00000048218" source="2838" target="2965" cy:directed="1"/>
      <edge id="39780" label="mmu-miR-27a-3p (miRNA-mRNA) ENSMUSG00000048279" source="2838" target="2107" cy:directed="1"/>
      <edge id="39779" label="mmu-miR-27a-3p (miRNA-mRNA) ENSMUSG00000046794" source="2838" target="2679" cy:directed="1"/>
      <edge id="39778" label="mmu-miR-27a-3p (miRNA-mRNA) ENSMUSG00000045312" source="2838" target="2057" cy:directed="1"/>
      <edge id="39777" label="mmu-miR-27a-3p (miRNA-mRNA) ENSMUSG00000048895" source="2838" target="1100" cy:directed="1"/>
      <edge id="39776" label="mmu-miR-27a-3p (miRNA-mRNA) ENSMUSG00000048022" source="2838" target="2101" cy:directed="1"/>
      <edge id="39775" label="mmu-miR-27a-3p (miRNA-mRNA) ENSMUSG00000048012" source="2838" target="2928" cy:directed="1"/>
      <edge id="39774" label="mmu-miR-27a-3p (miRNA-mRNA) ENSMUSG00000046432" source="2838" target="2514" cy:directed="1"/>
      <edge id="39773" label="mmu-miR-27a-3p (miRNA-mRNA) ENSMUSG00000047747" source="2838" target="779" cy:directed="1"/>
      <edge id="39772" label="mmu-miR-27a-3p (miRNA-mRNA) ENSMUSG00000046442" source="2838" target="2069" cy:directed="1"/>
      <edge id="39771" label="mmu-miR-27a-3p (miRNA-mRNA) ENSMUSG00000044340" source="2838" target="2044" cy:directed="1"/>
      <edge id="39770" label="mmu-miR-27a-3p (miRNA-mRNA) ENSMUSG00000044562" source="2838" target="2964" cy:directed="1"/>
      <edge id="39769" label="mmu-miR-27a-3p (miRNA-mRNA) ENSMUSG00000044288" source="2838" target="2041" cy:directed="1"/>
      <edge id="39768" label="mmu-miR-27a-3p (miRNA-mRNA) ENSMUSG00000042763" source="2838" target="733" cy:directed="1"/>
      <edge id="39767" label="mmu-miR-27a-3p (miRNA-mRNA) ENSMUSG00000042523" source="2838" target="2014" cy:directed="1"/>
      <edge id="39766" label="mmu-miR-27a-3p (miRNA-mRNA) ENSMUSG00000041729" source="2838" target="1996" cy:directed="1"/>
      <edge id="39765" label="mmu-miR-27a-3p (miRNA-mRNA) ENSMUSG00000042842" source="2838" target="2022" cy:directed="1"/>
      <edge id="39764" label="mmu-miR-27a-3p (miRNA-mRNA) ENSMUSG00000041444" source="2838" target="1990" cy:directed="1"/>
      <edge id="39763" label="mmu-miR-27a-3p (miRNA-mRNA) ENSMUSG00000043670" source="2838" target="2963" cy:directed="1"/>
      <edge id="39762" label="mmu-miR-27a-3p (miRNA-mRNA) ENSMUSG00000041930" source="2838" target="715" cy:directed="1"/>
      <edge id="39761" label="mmu-miR-27a-3p (miRNA-mRNA) ENSMUSG00000043885" source="2838" target="2034" cy:directed="1"/>
      <edge id="39760" label="mmu-miR-27a-3p (miRNA-mRNA) ENSMUSG00000042686" source="2838" target="2016" cy:directed="1"/>
      <edge id="39759" label="mmu-miR-27a-3p (miRNA-mRNA) ENSMUSG00000042675" source="2838" target="731" cy:directed="1"/>
      <edge id="39758" label="mmu-miR-27a-3p (miRNA-mRNA) ENSMUSG00000043496" source="2838" target="2884" cy:directed="1"/>
      <edge id="39757" label="mmu-miR-27a-3p (miRNA-mRNA) ENSMUSG00000042797" source="2838" target="2020" cy:directed="1"/>
      <edge id="39756" label="mmu-miR-27a-3p (miRNA-mRNA) ENSMUSG00000039740" source="2838" target="674" cy:directed="1"/>
      <edge id="39755" label="mmu-miR-27a-3p (miRNA-mRNA) ENSMUSG00000039809" source="2838" target="675" cy:directed="1"/>
      <edge id="39754" label="mmu-miR-27a-3p (miRNA-mRNA) ENSMUSG00000039967" source="2838" target="1957" cy:directed="1"/>
      <edge id="39753" label="mmu-miR-27a-3p (miRNA-mRNA) ENSMUSG00000040972" source="2838" target="695" cy:directed="1"/>
      <edge id="39752" label="mmu-miR-27a-3p (miRNA-mRNA) ENSMUSG00000040118" source="2838" target="1960" cy:directed="1"/>
      <edge id="39751" label="mmu-miR-27a-3p (miRNA-mRNA) ENSMUSG00000040563" source="2838" target="1971" cy:directed="1"/>
      <edge id="39750" label="mmu-miR-27a-3p (miRNA-mRNA) ENSMUSG00000040249" source="2838" target="105" cy:directed="1"/>
      <edge id="39749" label="mmu-miR-27a-3p (miRNA-mRNA) ENSMUSG00000041040" source="2838" target="697" cy:directed="1"/>
      <edge id="39748" label="mmu-miR-27a-3p (miRNA-mRNA) ENSMUSG00000040505" source="2838" target="2962" cy:directed="1"/>
      <edge id="39747" label="mmu-miR-27a-3p (miRNA-mRNA) ENSMUSG00000040134" source="2838" target="1962" cy:directed="1"/>
      <edge id="39746" label="mmu-miR-27a-3p (miRNA-mRNA) ENSMUSG00000040433" source="2838" target="687" cy:directed="1"/>
      <edge id="39745" label="mmu-miR-27a-3p (miRNA-mRNA) ENSMUSG00000040209" source="2838" target="681" cy:directed="1"/>
      <edge id="39744" label="mmu-miR-27a-3p (miRNA-mRNA) ENSMUSG00000039981" source="2838" target="1958" cy:directed="1"/>
      <edge id="39743" label="mmu-miR-27a-3p (miRNA-mRNA) ENSMUSG00000040351" source="2838" target="684" cy:directed="1"/>
      <edge id="39742" label="mmu-miR-27a-3p (miRNA-mRNA) ENSMUSG00000041075" source="2838" target="700" cy:directed="1"/>
      <edge id="39741" label="mmu-miR-27a-3p (miRNA-mRNA) ENSMUSG00000039270" source="2838" target="669" cy:directed="1"/>
      <edge id="39740" label="mmu-miR-27a-3p (miRNA-mRNA) ENSMUSG00000038349" source="2838" target="648" cy:directed="1"/>
      <edge id="39739" label="mmu-miR-27a-3p (miRNA-mRNA) ENSMUSG00000039530" source="2838" target="1945" cy:directed="1"/>
      <edge id="39738" label="mmu-miR-27a-3p (miRNA-mRNA) ENSMUSG00000038332" source="2838" target="2879" cy:directed="1"/>
      <edge id="39737" label="mmu-miR-27a-3p (miRNA-mRNA) ENSMUSG00000039126" source="2838" target="666" cy:directed="1"/>
      <edge id="39736" label="mmu-miR-27a-3p (miRNA-mRNA) ENSMUSG00000039114" source="2838" target="1931" cy:directed="1"/>
      <edge id="39735" label="mmu-miR-27a-3p (miRNA-mRNA) ENSMUSG00000038312" source="2838" target="646" cy:directed="1"/>
      <edge id="39734" label="mmu-miR-27a-3p (miRNA-mRNA) ENSMUSG00000039031" source="2838" target="1929" cy:directed="1"/>
      <edge id="39733" label="mmu-miR-27a-3p (miRNA-mRNA) ENSMUSG00000038065" source="2838" target="2961" cy:directed="1"/>
      <edge id="39732" label="mmu-miR-27a-3p (miRNA-mRNA) ENSMUSG00000038486" source="2838" target="1912" cy:directed="1"/>
      <edge id="39731" label="mmu-miR-27a-3p (miRNA-mRNA) ENSMUSG00000039157" source="2838" target="1933" cy:directed="1"/>
      <edge id="39730" label="mmu-miR-27a-3p (miRNA-mRNA) ENSMUSG00000039087" source="2838" target="665" cy:directed="1"/>
      <edge id="39729" label="mmu-miR-27a-3p (miRNA-mRNA) ENSMUSG00000037855" source="2838" target="640" cy:directed="1"/>
      <edge id="39728" label="mmu-miR-27a-3p (miRNA-mRNA) ENSMUSG00000037217" source="2838" target="618" cy:directed="1"/>
      <edge id="39727" label="mmu-miR-27a-3p (miRNA-mRNA) ENSMUSG00000037712" source="2838" target="636" cy:directed="1"/>
      <edge id="39726" label="mmu-miR-27a-3p (miRNA-mRNA) ENSMUSG00000036880" source="2838" target="1877" cy:directed="1"/>
      <edge id="39725" label="mmu-miR-27a-3p (miRNA-mRNA) ENSMUSG00000037852" source="2838" target="639" cy:directed="1"/>
      <edge id="39724" label="mmu-miR-27a-3p (miRNA-mRNA) ENSMUSG00000037071" source="2838" target="616" cy:directed="1"/>
      <edge id="39723" label="mmu-miR-27a-3p (miRNA-mRNA) ENSMUSG00000037818" source="2838" target="2906" cy:directed="1"/>
      <edge id="39722" label="mmu-miR-27a-3p (miRNA-mRNA) ENSMUSG00000036782" source="2838" target="1874" cy:directed="1"/>
      <edge id="39721" label="mmu-miR-27a-3p (miRNA-mRNA) ENSMUSG00000036989" source="2838" target="614" cy:directed="1"/>
      <edge id="39720" label="mmu-miR-27a-3p (miRNA-mRNA) ENSMUSG00000037942" source="2838" target="1897" cy:directed="1"/>
      <edge id="39719" label="mmu-miR-27a-3p (miRNA-mRNA) ENSMUSG00000037905" source="2838" target="1896" cy:directed="1"/>
      <edge id="39718" label="mmu-miR-27a-3p (miRNA-mRNA) ENSMUSG00000036766" source="2838" target="1873" cy:directed="1"/>
      <edge id="39717" label="mmu-miR-27a-3p (miRNA-mRNA) ENSMUSG00000037709" source="2838" target="1893" cy:directed="1"/>
      <edge id="39716" label="mmu-miR-27a-3p (miRNA-mRNA) ENSMUSG00000037972" source="2838" target="642" cy:directed="1"/>
      <edge id="39715" label="mmu-miR-27a-3p (miRNA-mRNA) ENSMUSG00000036295" source="2838" target="2960" cy:directed="1"/>
      <edge id="39714" label="mmu-miR-27a-3p (miRNA-mRNA) ENSMUSG00000034648" source="2838" target="1821" cy:directed="1"/>
      <edge id="39713" label="mmu-miR-27a-3p (miRNA-mRNA) ENSMUSG00000034593" source="2838" target="1091" cy:directed="1"/>
      <edge id="39712" label="mmu-miR-27a-3p (miRNA-mRNA) ENSMUSG00000035239" source="2838" target="1835" cy:directed="1"/>
      <edge id="39711" label="mmu-miR-27a-3p (miRNA-mRNA) ENSMUSG00000034701" source="2838" target="2617" cy:directed="1"/>
      <edge id="39710" label="mmu-miR-27a-3p (miRNA-mRNA) ENSMUSG00000036053" source="2838" target="1856" cy:directed="1"/>
      <edge id="39709" label="mmu-miR-27a-3p (miRNA-mRNA) ENSMUSG00000035459" source="2838" target="2959" cy:directed="1"/>
      <edge id="39708" label="mmu-miR-27a-3p (miRNA-mRNA) ENSMUSG00000034563" source="2838" target="2923" cy:directed="1"/>
      <edge id="39707" label="mmu-miR-27a-3p (miRNA-mRNA) ENSMUSG00000034781" source="2838" target="583" cy:directed="1"/>
      <edge id="39706" label="mmu-miR-27a-3p (miRNA-mRNA) ENSMUSG00000035900" source="2838" target="601" cy:directed="1"/>
      <edge id="39705" label="mmu-miR-27a-3p (miRNA-mRNA) ENSMUSG00000035847" source="2838" target="1849" cy:directed="1"/>
      <edge id="39704" label="mmu-miR-27a-3p (miRNA-mRNA) ENSMUSG00000035365" source="2838" target="2958" cy:directed="1"/>
      <edge id="39703" label="mmu-miR-27a-3p (miRNA-mRNA) ENSMUSG00000034724" source="2838" target="1826" cy:directed="1"/>
      <edge id="39702" label="mmu-miR-27a-3p (miRNA-mRNA) ENSMUSG00000034663" source="2838" target="1823" cy:directed="1"/>
      <edge id="39701" label="mmu-miR-27a-3p (miRNA-mRNA) ENSMUSG00000035683" source="2838" target="598" cy:directed="1"/>
      <edge id="39700" label="mmu-miR-27a-3p (miRNA-mRNA) ENSMUSG00000034522" source="2838" target="2957" cy:directed="1"/>
      <edge id="39699" label="mmu-miR-27a-3p (miRNA-mRNA) ENSMUSG00000034656" source="2838" target="1822" cy:directed="1"/>
      <edge id="39698" label="mmu-miR-27a-3p (miRNA-mRNA) ENSMUSG00000033624" source="2838" target="1804" cy:directed="1"/>
      <edge id="39697" label="mmu-miR-27a-3p (miRNA-mRNA) ENSMUSG00000034116" source="2838" target="572" cy:directed="1"/>
      <edge id="39696" label="mmu-miR-27a-3p (miRNA-mRNA) ENSMUSG00000033161" source="2838" target="556" cy:directed="1"/>
      <edge id="39695" label="mmu-miR-27a-3p (miRNA-mRNA) ENSMUSG00000033900" source="2838" target="569" cy:directed="1"/>
      <edge id="39694" label="mmu-miR-27a-3p (miRNA-mRNA) ENSMUSG00000033416" source="2838" target="2846" cy:directed="1"/>
      <edge id="39693" label="mmu-miR-27a-3p (miRNA-mRNA) ENSMUSG00000032936" source="2838" target="2956" cy:directed="1"/>
      <edge id="39692" label="mmu-miR-27a-3p (miRNA-mRNA) ENSMUSG00000034111" source="2838" target="2871" cy:directed="1"/>
      <edge id="39691" label="mmu-miR-27a-3p (miRNA-mRNA) ENSMUSG00000034413" source="2838" target="576" cy:directed="1"/>
      <edge id="39690" label="mmu-miR-27a-3p (miRNA-mRNA) ENSMUSG00000033083" source="2838" target="1790" cy:directed="1"/>
      <edge id="39689" label="mmu-miR-27a-3p (miRNA-mRNA) ENSMUSG00000031532" source="2838" target="1720" cy:directed="1"/>
      <edge id="39688" label="mmu-miR-27a-3p (miRNA-mRNA) ENSMUSG00000031827" source="2838" target="518" cy:directed="1"/>
      <edge id="39687" label="mmu-miR-27a-3p (miRNA-mRNA) ENSMUSG00000031748" source="2838" target="2955" cy:directed="1"/>
      <edge id="39686" label="mmu-miR-27a-3p (miRNA-mRNA) ENSMUSG00000032035" source="2838" target="109" cy:directed="1"/>
      <edge id="39685" label="mmu-miR-27a-3p (miRNA-mRNA) ENSMUSG00000031925" source="2838" target="521" cy:directed="1"/>
      <edge id="39684" label="mmu-miR-27a-3p (miRNA-mRNA) ENSMUSG00000031902" source="2838" target="1740" cy:directed="1"/>
      <edge id="39683" label="mmu-miR-27a-3p (miRNA-mRNA) ENSMUSG00000032014" source="2838" target="1745" cy:directed="1"/>
      <edge id="39682" label="mmu-miR-27a-3p (miRNA-mRNA) ENSMUSG00000031732" source="2838" target="2503" cy:directed="1"/>
      <edge id="39681" label="mmu-miR-27a-3p (miRNA-mRNA) ENSMUSG00000032238" source="2838" target="527" cy:directed="1"/>
      <edge id="39680" label="mmu-miR-27a-3p (miRNA-mRNA) ENSMUSG00000031349" source="2838" target="2502" cy:directed="1"/>
      <edge id="39679" label="mmu-miR-27a-3p (miRNA-mRNA) ENSMUSG00000030772" source="2838" target="492" cy:directed="1"/>
      <edge id="39678" label="mmu-miR-27a-3p (miRNA-mRNA) ENSMUSG00000030695" source="2838" target="2954" cy:directed="1"/>
      <edge id="39677" label="mmu-miR-27a-3p (miRNA-mRNA) ENSMUSG00000031367" source="2838" target="1710" cy:directed="1"/>
      <edge id="39676" label="mmu-miR-27a-3p (miRNA-mRNA) ENSMUSG00000031004" source="2838" target="494" cy:directed="1"/>
      <edge id="39675" label="mmu-miR-27a-3p (miRNA-mRNA) ENSMUSG00000030088" source="2838" target="2953" cy:directed="1"/>
      <edge id="39674" label="mmu-miR-27a-3p (miRNA-mRNA) ENSMUSG00000031353" source="2838" target="501" cy:directed="1"/>
      <edge id="39673" label="mmu-miR-27a-3p (miRNA-mRNA) ENSMUSG00000030102" source="2838" target="1674" cy:directed="1"/>
      <edge id="39672" label="mmu-miR-27a-3p (miRNA-mRNA) ENSMUSG00000030528" source="2838" target="1686" cy:directed="1"/>
      <edge id="39671" label="mmu-miR-27a-3p (miRNA-mRNA) ENSMUSG00000031502" source="2838" target="2952" cy:directed="1"/>
      <edge id="39670" label="mmu-miR-27a-3p (miRNA-mRNA) ENSMUSG00000030428" source="2838" target="2951" cy:directed="1"/>
      <edge id="39669" label="mmu-miR-27a-3p (miRNA-mRNA) ENSMUSG00000031453" source="2838" target="506" cy:directed="1"/>
      <edge id="39668" label="mmu-miR-27a-3p (miRNA-mRNA) ENSMUSG00000031144" source="2838" target="496" cy:directed="1"/>
      <edge id="39667" label="mmu-miR-27a-3p (miRNA-mRNA) ENSMUSG00000030671" source="2838" target="1689" cy:directed="1"/>
      <edge id="39666" label="mmu-miR-27a-3p (miRNA-mRNA) ENSMUSG00000031207" source="2838" target="1704" cy:directed="1"/>
      <edge id="39665" label="mmu-miR-27a-3p (miRNA-mRNA) ENSMUSG00000029419" source="2838" target="1648" cy:directed="1"/>
      <edge id="39664" label="mmu-miR-27a-3p (miRNA-mRNA) ENSMUSG00000028986" source="2838" target="1626" cy:directed="1"/>
      <edge id="39663" label="mmu-miR-27a-3p (miRNA-mRNA) ENSMUSG00000029924" source="2838" target="1671" cy:directed="1"/>
      <edge id="39662" label="mmu-miR-27a-3p (miRNA-mRNA) ENSMUSG00000029095" source="2838" target="459" cy:directed="1"/>
      <edge id="39661" label="mmu-miR-27a-3p (miRNA-mRNA) ENSMUSG00000029674" source="2838" target="471" cy:directed="1"/>
      <edge id="39660" label="mmu-miR-27a-3p (miRNA-mRNA) ENSMUSG00000029761" source="2838" target="1662" cy:directed="1"/>
      <edge id="39659" label="mmu-miR-27a-3p (miRNA-mRNA) ENSMUSG00000029369" source="2838" target="1643" cy:directed="1"/>
      <edge id="39658" label="mmu-miR-27a-3p (miRNA-mRNA) ENSMUSG00000029121" source="2838" target="1629" cy:directed="1"/>
      <edge id="39657" label="mmu-miR-27a-3p (miRNA-mRNA) ENSMUSG00000029260" source="2838" target="1638" cy:directed="1"/>
      <edge id="39656" label="mmu-miR-27a-3p (miRNA-mRNA) ENSMUSG00000029153" source="2838" target="460" cy:directed="1"/>
      <edge id="39655" label="mmu-miR-27a-3p (miRNA-mRNA) ENSMUSG00000029156" source="2838" target="1632" cy:directed="1"/>
      <edge id="39654" label="mmu-miR-27a-3p (miRNA-mRNA) ENSMUSG00000029287" source="2838" target="1119" cy:directed="1"/>
      <edge id="39653" label="mmu-miR-27a-3p (miRNA-mRNA) ENSMUSG00000029330" source="2838" target="465" cy:directed="1"/>
      <edge id="39652" label="mmu-miR-27a-3p (miRNA-mRNA) ENSMUSG00000028698" source="2838" target="2950" cy:directed="1"/>
      <edge id="39651" label="mmu-miR-27a-3p (miRNA-mRNA) ENSMUSG00000027983" source="2838" target="2949" cy:directed="1"/>
      <edge id="39650" label="mmu-miR-27a-3p (miRNA-mRNA) ENSMUSG00000028111" source="2838" target="1599" cy:directed="1"/>
      <edge id="39649" label="mmu-miR-27a-3p (miRNA-mRNA) ENSMUSG00000028057" source="2838" target="2455" cy:directed="1"/>
      <edge id="39648" label="mmu-miR-27a-3p (miRNA-mRNA) ENSMUSG00000028312" source="2838" target="435" cy:directed="1"/>
      <edge id="39647" label="mmu-miR-27a-3p (miRNA-mRNA) ENSMUSG00000028737" source="2838" target="2948" cy:directed="1"/>
      <edge id="39646" label="mmu-miR-27a-3p (miRNA-mRNA) ENSMUSG00000028519" source="2838" target="1613" cy:directed="1"/>
      <edge id="39645" label="mmu-miR-27a-3p (miRNA-mRNA) ENSMUSG00000028226" source="2838" target="1606" cy:directed="1"/>
      <edge id="39644" label="mmu-miR-27a-3p (miRNA-mRNA) ENSMUSG00000027761" source="2838" target="2896" cy:directed="1"/>
      <edge id="39643" label="mmu-miR-27a-3p (miRNA-mRNA) ENSMUSG00000028186" source="2838" target="431" cy:directed="1"/>
      <edge id="39642" label="mmu-miR-27a-3p (miRNA-mRNA) ENSMUSG00000027799" source="2838" target="1582" cy:directed="1"/>
      <edge id="39641" label="mmu-miR-27a-3p (miRNA-mRNA) ENSMUSG00000028527" source="2838" target="1615" cy:directed="1"/>
      <edge id="39640" label="mmu-miR-27a-3p (miRNA-mRNA) ENSMUSG00000028211" source="2838" target="432" cy:directed="1"/>
      <edge id="39639" label="mmu-miR-27a-3p (miRNA-mRNA) ENSMUSG00000028078" source="2838" target="1596" cy:directed="1"/>
      <edge id="39638" label="mmu-miR-27a-3p (miRNA-mRNA) ENSMUSG00000027822" source="2838" target="2866" cy:directed="1"/>
      <edge id="39637" label="mmu-miR-27a-3p (miRNA-mRNA) ENSMUSG00000028614" source="2838" target="1087" cy:directed="1"/>
      <edge id="39636" label="mmu-miR-27a-3p (miRNA-mRNA) ENSMUSG00000028158" source="2838" target="1601" cy:directed="1"/>
      <edge id="39635" label="mmu-miR-27a-3p (miRNA-mRNA) ENSMUSG00000028403" source="2838" target="2430" cy:directed="1"/>
      <edge id="39634" label="mmu-miR-27a-3p (miRNA-mRNA) ENSMUSG00000028039" source="2838" target="1593" cy:directed="1"/>
      <edge id="39633" label="mmu-miR-27a-3p (miRNA-mRNA) ENSMUSG00000028517" source="2838" target="441" cy:directed="1"/>
      <edge id="39632" label="mmu-miR-27a-3p (miRNA-mRNA) ENSMUSG00000027947" source="2838" target="2542" cy:directed="1"/>
      <edge id="39631" label="mmu-miR-27a-3p (miRNA-mRNA) ENSMUSG00000028518" source="2838" target="1612" cy:directed="1"/>
      <edge id="39630" label="mmu-miR-27a-3p (miRNA-mRNA) ENSMUSG00000028649" source="2838" target="1620" cy:directed="1"/>
      <edge id="39629" label="mmu-miR-27a-3p (miRNA-mRNA) ENSMUSG00000027834" source="2838" target="423" cy:directed="1"/>
      <edge id="39628" label="mmu-miR-27a-3p (miRNA-mRNA) ENSMUSG00000028655" source="2838" target="2947" cy:directed="1"/>
      <edge id="39627" label="mmu-miR-27a-3p (miRNA-mRNA) ENSMUSG00000028634" source="2838" target="446" cy:directed="1"/>
      <edge id="39626" label="mmu-miR-27a-3p (miRNA-mRNA) ENSMUSG00000027737" source="2838" target="1578" cy:directed="1"/>
      <edge id="39625" label="mmu-miR-27a-3p (miRNA-mRNA) ENSMUSG00000026825" source="2838" target="2946" cy:directed="1"/>
      <edge id="39624" label="mmu-miR-27a-3p (miRNA-mRNA) ENSMUSG00000027350" source="2838" target="1562" cy:directed="1"/>
      <edge id="39623" label="mmu-miR-27a-3p (miRNA-mRNA) ENSMUSG00000027698" source="2838" target="419" cy:directed="1"/>
      <edge id="39622" label="mmu-miR-27a-3p (miRNA-mRNA) ENSMUSG00000026811" source="2838" target="2945" cy:directed="1"/>
      <edge id="39621" label="mmu-miR-27a-3p (miRNA-mRNA) ENSMUSG00000027712" source="2838" target="2944" cy:directed="1"/>
      <edge id="39620" label="mmu-miR-27a-3p (miRNA-mRNA) ENSMUSG00000027200" source="2838" target="1554" cy:directed="1"/>
      <edge id="39619" label="mmu-miR-27a-3p (miRNA-mRNA) ENSMUSG00000026880" source="2838" target="399" cy:directed="1"/>
      <edge id="39618" label="mmu-miR-27a-3p (miRNA-mRNA) ENSMUSG00000027438" source="2838" target="1568" cy:directed="1"/>
      <edge id="39617" label="mmu-miR-27a-3p (miRNA-mRNA) ENSMUSG00000027605" source="2838" target="2943" cy:directed="1"/>
      <edge id="39616" label="mmu-miR-27a-3p (miRNA-mRNA) ENSMUSG00000026848" source="2838" target="397" cy:directed="1"/>
      <edge id="39615" label="mmu-miR-27a-3p (miRNA-mRNA) ENSMUSG00000027435" source="2838" target="1567" cy:directed="1"/>
      <edge id="39614" label="mmu-miR-27a-3p (miRNA-mRNA) ENSMUSG00000027715" source="2838" target="420" cy:directed="1"/>
      <edge id="39613" label="mmu-miR-27a-3p (miRNA-mRNA) ENSMUSG00000027306" source="2838" target="2903" cy:directed="1"/>
      <edge id="39612" label="mmu-miR-27a-3p (miRNA-mRNA) ENSMUSG00000026782" source="2838" target="396" cy:directed="1"/>
      <edge id="39611" label="mmu-miR-27a-3p (miRNA-mRNA) ENSMUSG00000026730" source="2838" target="395" cy:directed="1"/>
      <edge id="39610" label="mmu-miR-27a-3p (miRNA-mRNA) ENSMUSG00000027544" source="2838" target="108" cy:directed="1"/>
      <edge id="39609" label="mmu-miR-27a-3p (miRNA-mRNA) ENSMUSG00000026970" source="2838" target="1547" cy:directed="1"/>
      <edge id="39608" label="mmu-miR-27a-3p (miRNA-mRNA) ENSMUSG00000026764" source="2838" target="1022" cy:directed="1"/>
      <edge id="39607" label="mmu-miR-27a-3p (miRNA-mRNA) ENSMUSG00000027273" source="2838" target="1025" cy:directed="1"/>
      <edge id="39606" label="mmu-miR-27a-3p (miRNA-mRNA) ENSMUSG00000026687" source="2838" target="1535" cy:directed="1"/>
      <edge id="39605" label="mmu-miR-27a-3p (miRNA-mRNA) ENSMUSG00000026193" source="2838" target="2942" cy:directed="1"/>
      <edge id="39604" label="mmu-miR-27a-3p (miRNA-mRNA) ENSMUSG00000026235" source="2838" target="2648" cy:directed="1"/>
      <edge id="39603" label="mmu-miR-27a-3p (miRNA-mRNA) ENSMUSG00000025867" source="2838" target="1497" cy:directed="1"/>
      <edge id="39602" label="mmu-miR-27a-3p (miRNA-mRNA) ENSMUSG00000026094" source="2838" target="1083" cy:directed="1"/>
      <edge id="39601" label="mmu-miR-27a-3p (miRNA-mRNA) ENSMUSG00000026678" source="2838" target="1534" cy:directed="1"/>
      <edge id="39600" label="mmu-miR-27a-3p (miRNA-mRNA) ENSMUSG00000025791" source="2838" target="2917" cy:directed="1"/>
      <edge id="39599" label="mmu-miR-27a-3p (miRNA-mRNA) ENSMUSG00000026395" source="2838" target="1521" cy:directed="1"/>
      <edge id="39598" label="mmu-miR-27a-3p (miRNA-mRNA) ENSMUSG00000026227" source="2838" target="1513" cy:directed="1"/>
      <edge id="39597" label="mmu-miR-27a-3p (miRNA-mRNA) ENSMUSG00000026489" source="2838" target="1529" cy:directed="1"/>
      <edge id="39596" label="mmu-miR-27a-3p (miRNA-mRNA) ENSMUSG00000025738" source="2838" target="2941" cy:directed="1"/>
      <edge id="39595" label="mmu-miR-27a-3p (miRNA-mRNA) ENSMUSG00000025991" source="2838" target="376" cy:directed="1"/>
      <edge id="39594" label="mmu-miR-27a-3p (miRNA-mRNA) ENSMUSG00000026483" source="2838" target="387" cy:directed="1"/>
      <edge id="39593" label="mmu-miR-27a-3p (miRNA-mRNA) ENSMUSG00000026185" source="2838" target="1509" cy:directed="1"/>
      <edge id="39592" label="mmu-miR-27a-3p (miRNA-mRNA) ENSMUSG00000026605" source="2838" target="393" cy:directed="1"/>
      <edge id="39591" label="mmu-miR-27a-3p (miRNA-mRNA) ENSMUSG00000026405" source="2838" target="1522" cy:directed="1"/>
      <edge id="39590" label="mmu-miR-27a-3p (miRNA-mRNA) ENSMUSG00000026223" source="2838" target="1512" cy:directed="1"/>
      <edge id="39589" label="mmu-miR-27a-3p (miRNA-mRNA) ENSMUSG00000026604" source="2838" target="392" cy:directed="1"/>
      <edge id="39588" label="mmu-miR-27a-3p (miRNA-mRNA) ENSMUSG00000026442" source="2838" target="385" cy:directed="1"/>
      <edge id="39587" label="mmu-miR-27a-3p (miRNA-mRNA) ENSMUSG00000026107" source="2838" target="380" cy:directed="1"/>
      <edge id="39586" label="mmu-miR-27a-3p (miRNA-mRNA) ENSMUSG00000026437" source="2838" target="2865" cy:directed="1"/>
      <edge id="39585" label="mmu-miR-27a-3p (miRNA-mRNA) ENSMUSG00000024424" source="2838" target="1427" cy:directed="1"/>
      <edge id="39584" label="mmu-miR-27a-3p (miRNA-mRNA) ENSMUSG00000025185" source="2838" target="357" cy:directed="1"/>
      <edge id="39583" label="mmu-miR-27a-3p (miRNA-mRNA) ENSMUSG00000024302" source="2838" target="1419" cy:directed="1"/>
      <edge id="39582" label="mmu-miR-27a-3p (miRNA-mRNA) ENSMUSG00000025477" source="2838" target="362" cy:directed="1"/>
      <edge id="39581" label="mmu-miR-27a-3p (miRNA-mRNA) ENSMUSG00000024411" source="2838" target="1424" cy:directed="1"/>
      <edge id="39580" label="mmu-miR-27a-3p (miRNA-mRNA) ENSMUSG00000024431" source="2838" target="79" cy:directed="1"/>
      <edge id="39579" label="mmu-miR-27a-3p (miRNA-mRNA) ENSMUSG00000024978" source="2838" target="349" cy:directed="1"/>
      <edge id="39578" label="mmu-miR-27a-3p (miRNA-mRNA) ENSMUSG00000024378" source="2838" target="330" cy:directed="1"/>
      <edge id="39577" label="mmu-miR-27a-3p (miRNA-mRNA) ENSMUSG00000024423" source="2838" target="1426" cy:directed="1"/>
      <edge id="39576" label="mmu-miR-27a-3p (miRNA-mRNA) ENSMUSG00000024590" source="2838" target="336" cy:directed="1"/>
      <edge id="39575" label="mmu-miR-27a-3p (miRNA-mRNA) ENSMUSG00000025203" source="2838" target="1471" cy:directed="1"/>
      <edge id="39574" label="mmu-miR-27a-3p (miRNA-mRNA) ENSMUSG00000024479" source="2838" target="331" cy:directed="1"/>
      <edge id="39573" label="mmu-miR-27a-3p (miRNA-mRNA) ENSMUSG00000022551" source="2838" target="1368" cy:directed="1"/>
      <edge id="39572" label="mmu-miR-27a-3p (miRNA-mRNA) ENSMUSG00000024066" source="2838" target="1412" cy:directed="1"/>
      <edge id="39571" label="mmu-miR-27a-3p (miRNA-mRNA) ENSMUSG00000022853" source="2838" target="1384" cy:directed="1"/>
      <edge id="39570" label="mmu-miR-27a-3p (miRNA-mRNA) ENSMUSG00000022587" source="2838" target="1372" cy:directed="1"/>
      <edge id="39569" label="mmu-miR-27a-3p (miRNA-mRNA) ENSMUSG00000023036" source="2838" target="2864" cy:directed="1"/>
      <edge id="39568" label="mmu-miR-27a-3p (miRNA-mRNA) ENSMUSG00000022619" source="2838" target="1375" cy:directed="1"/>
      <edge id="39567" label="mmu-miR-27a-3p (miRNA-mRNA) ENSMUSG00000023940" source="2838" target="318" cy:directed="1"/>
      <edge id="39566" label="mmu-miR-27a-3p (miRNA-mRNA) ENSMUSG00000022837" source="2838" target="2940" cy:directed="1"/>
      <edge id="39565" label="mmu-miR-27a-3p (miRNA-mRNA) ENSMUSG00000023827" source="2838" target="315" cy:directed="1"/>
      <edge id="39564" label="mmu-miR-27a-3p (miRNA-mRNA) ENSMUSG00000022661" source="2838" target="2491" cy:directed="1"/>
      <edge id="39563" label="mmu-miR-27a-3p (miRNA-mRNA) ENSMUSG00000023019" source="2838" target="2939" cy:directed="1"/>
      <edge id="39562" label="mmu-miR-27a-3p (miRNA-mRNA) ENSMUSG00000022637" source="2838" target="292" cy:directed="1"/>
      <edge id="39561" label="mmu-miR-27a-3p (miRNA-mRNA) ENSMUSG00000024063" source="2838" target="1411" cy:directed="1"/>
      <edge id="39560" label="mmu-miR-27a-3p (miRNA-mRNA) ENSMUSG00000022477" source="2838" target="1364" cy:directed="1"/>
      <edge id="39559" label="mmu-miR-27a-3p (miRNA-mRNA) ENSMUSG00000022332" source="2838" target="1359" cy:directed="1"/>
      <edge id="39558" label="mmu-miR-27a-3p (miRNA-mRNA) ENSMUSG00000022489" source="2838" target="1365" cy:directed="1"/>
      <edge id="39557" label="mmu-miR-27a-3p (miRNA-mRNA) ENSMUSG00000021913" source="2838" target="1343" cy:directed="1"/>
      <edge id="39556" label="mmu-miR-27a-3p (miRNA-mRNA) ENSMUSG00000022043" source="2838" target="2895" cy:directed="1"/>
      <edge id="39555" label="mmu-miR-27a-3p (miRNA-mRNA) ENSMUSG00000022383" source="2838" target="76" cy:directed="1"/>
      <edge id="39554" label="mmu-miR-27a-3p (miRNA-mRNA) ENSMUSG00000022218" source="2838" target="1357" cy:directed="1"/>
      <edge id="39553" label="mmu-miR-27a-3p (miRNA-mRNA) ENSMUSG00000021957" source="2838" target="271" cy:directed="1"/>
      <edge id="39552" label="mmu-miR-27a-3p (miRNA-mRNA) ENSMUSG00000021806" source="2838" target="266" cy:directed="1"/>
      <edge id="39551" label="mmu-miR-27a-3p (miRNA-mRNA) ENSMUSG00000021733" source="2838" target="1337" cy:directed="1"/>
      <edge id="39550" label="mmu-miR-27a-3p (miRNA-mRNA) ENSMUSG00000021822" source="2838" target="267" cy:directed="1"/>
      <edge id="39549" label="mmu-miR-27a-3p (miRNA-mRNA) ENSMUSG00000021831" source="2838" target="268" cy:directed="1"/>
      <edge id="39548" label="mmu-miR-27a-3p (miRNA-mRNA) ENSMUSG00000022358" source="2838" target="2845" cy:directed="1"/>
      <edge id="39547" label="mmu-miR-27a-3p (miRNA-mRNA) ENSMUSG00000022136" source="2838" target="276" cy:directed="1"/>
      <edge id="39546" label="mmu-miR-27a-3p (miRNA-mRNA) ENSMUSG00000021779" source="2838" target="75" cy:directed="1"/>
      <edge id="39545" label="mmu-miR-27a-3p (miRNA-mRNA) ENSMUSG00000021559" source="2838" target="1328" cy:directed="1"/>
      <edge id="39544" label="mmu-miR-27a-3p (miRNA-mRNA) ENSMUSG00000020723" source="2838" target="2938" cy:directed="1"/>
      <edge id="39543" label="mmu-miR-27a-3p (miRNA-mRNA) ENSMUSG00000020900" source="2838" target="1310" cy:directed="1"/>
      <edge id="39542" label="mmu-miR-27a-3p (miRNA-mRNA) ENSMUSG00000020684" source="2838" target="1302" cy:directed="1"/>
      <edge id="39541" label="mmu-miR-27a-3p (miRNA-mRNA) ENSMUSG00000021608" source="2838" target="1330" cy:directed="1"/>
      <edge id="39540" label="mmu-miR-27a-3p (miRNA-mRNA) ENSMUSG00000021061" source="2838" target="1314" cy:directed="1"/>
      <edge id="39539" label="mmu-miR-27a-3p (miRNA-mRNA) ENSMUSG00000021262" source="2838" target="2914" cy:directed="1"/>
      <edge id="39538" label="mmu-miR-27a-3p (miRNA-mRNA) ENSMUSG00000021340" source="2838" target="1323" cy:directed="1"/>
      <edge id="39537" label="mmu-miR-27a-3p (miRNA-mRNA) ENSMUSG00000020978" source="2838" target="249" cy:directed="1"/>
      <edge id="39536" label="mmu-miR-27a-3p (miRNA-mRNA) ENSMUSG00000021066" source="2838" target="2937" cy:directed="1"/>
      <edge id="39535" label="mmu-miR-27a-3p (miRNA-mRNA) ENSMUSG00000020696" source="2838" target="1303" cy:directed="1"/>
      <edge id="39534" label="mmu-miR-27a-3p (miRNA-mRNA) ENSMUSG00000021062" source="2838" target="2936" cy:directed="1"/>
      <edge id="39533" label="mmu-miR-27a-3p (miRNA-mRNA) ENSMUSG00000021175" source="2838" target="1316" cy:directed="1"/>
      <edge id="39532" label="mmu-miR-27a-3p (miRNA-mRNA) ENSMUSG00000021577" source="2838" target="2902" cy:directed="1"/>
      <edge id="39531" label="mmu-miR-27a-3p (miRNA-mRNA) ENSMUSG00000021701" source="2838" target="264" cy:directed="1"/>
      <edge id="39530" label="mmu-miR-27a-3p (miRNA-mRNA) ENSMUSG00000020009" source="2838" target="222" cy:directed="1"/>
      <edge id="39529" label="mmu-miR-27a-3p (miRNA-mRNA) ENSMUSG00000019883" source="2838" target="2859" cy:directed="1"/>
      <edge id="39528" label="mmu-miR-27a-3p (miRNA-mRNA) ENSMUSG00000019890" source="2838" target="1268" cy:directed="1"/>
      <edge id="39527" label="mmu-miR-27a-3p (miRNA-mRNA) ENSMUSG00000019817" source="2838" target="215" cy:directed="1"/>
      <edge id="39526" label="mmu-miR-27a-3p (miRNA-mRNA) ENSMUSG00000019982" source="2838" target="1272" cy:directed="1"/>
      <edge id="39525" label="mmu-miR-27a-3p (miRNA-mRNA) ENSMUSG00000020184" source="2838" target="87" cy:directed="1"/>
      <edge id="39524" label="mmu-miR-27a-3p (miRNA-mRNA) ENSMUSG00000020258" source="2838" target="2935" cy:directed="1"/>
      <edge id="39523" label="mmu-miR-27a-3p (miRNA-mRNA) ENSMUSG00000019917" source="2838" target="2663" cy:directed="1"/>
      <edge id="39522" label="mmu-miR-27a-3p (miRNA-mRNA) ENSMUSG00000019564" source="2838" target="212" cy:directed="1"/>
      <edge id="39521" label="mmu-miR-27a-3p (miRNA-mRNA) ENSMUSG00000020015" source="2838" target="224" cy:directed="1"/>
      <edge id="39520" label="mmu-miR-27a-3p (miRNA-mRNA) ENSMUSG00000020154" source="2838" target="2486" cy:directed="1"/>
      <edge id="39519" label="mmu-miR-27a-3p (miRNA-mRNA) ENSMUSG00000019843" source="2838" target="1265" cy:directed="1"/>
      <edge id="39518" label="mmu-miR-27a-3p (miRNA-mRNA) ENSMUSG00000020120" source="2838" target="2934" cy:directed="1"/>
      <edge id="39517" label="mmu-miR-27a-3p (miRNA-mRNA) ENSMUSG00000020186" source="2838" target="1280" cy:directed="1"/>
      <edge id="39516" label="mmu-miR-27a-3p (miRNA-mRNA) ENSMUSG00000019647" source="2838" target="213" cy:directed="1"/>
      <edge id="39515" label="mmu-miR-27a-3p (miRNA-mRNA) ENSMUSG00000020423" source="2838" target="1290" cy:directed="1"/>
      <edge id="39514" label="mmu-miR-27a-3p (miRNA-mRNA) ENSMUSG00000013160" source="2838" target="2607" cy:directed="1"/>
      <edge id="39513" label="mmu-miR-27a-3p (miRNA-mRNA) ENSMUSG00000014602" source="2838" target="178" cy:directed="1"/>
      <edge id="39512" label="mmu-miR-27a-3p (miRNA-mRNA) ENSMUSG00000018909" source="2838" target="107" cy:directed="1"/>
      <edge id="39511" label="mmu-miR-27a-3p (miRNA-mRNA) ENSMUSG00000014164" source="2838" target="1003" cy:directed="1"/>
      <edge id="39510" label="mmu-miR-27a-3p (miRNA-mRNA) ENSMUSG00000017446" source="2838" target="195" cy:directed="1"/>
      <edge id="39509" label="mmu-miR-27a-3p (miRNA-mRNA) ENSMUSG00000015837" source="2838" target="2912" cy:directed="1"/>
      <edge id="39508" label="mmu-miR-27a-3p (miRNA-mRNA) ENSMUSG00000015709" source="2838" target="1232" cy:directed="1"/>
      <edge id="39507" label="mmu-miR-27a-3p (miRNA-mRNA) ENSMUSG00000010663" source="2838" target="1212" cy:directed="1"/>
      <edge id="39506" label="mmu-miR-27a-3p (miRNA-mRNA) ENSMUSG00000016534" source="2838" target="1235" cy:directed="1"/>
      <edge id="39505" label="mmu-miR-27a-3p (miRNA-mRNA) ENSMUSG00000018846" source="2838" target="1253" cy:directed="1"/>
      <edge id="39504" label="mmu-miR-27a-3p (miRNA-mRNA) ENSMUSG00000015647" source="2838" target="183" cy:directed="1"/>
      <edge id="39503" label="mmu-miR-27a-3p (miRNA-mRNA) ENSMUSG00000018199" source="2838" target="2858" cy:directed="1"/>
      <edge id="39502" label="mmu-miR-27a-3p (miRNA-mRNA) ENSMUSG00000016541" source="2838" target="1236" cy:directed="1"/>
      <edge id="39501" label="mmu-miR-27a-3p (miRNA-mRNA) ENSMUSG00000018334" source="2838" target="202" cy:directed="1"/>
      <edge id="39500" label="mmu-miR-27a-3p (miRNA-mRNA) ENSMUSG00000009394" source="2838" target="2933" cy:directed="1"/>
      <edge id="39499" label="mmu-miR-27a-3p (miRNA-mRNA) ENSMUSG00000004044" source="2838" target="138" cy:directed="1"/>
      <edge id="39498" label="mmu-miR-27a-3p (miRNA-mRNA) ENSMUSG00000006362" source="2838" target="1124" cy:directed="1"/>
      <edge id="39497" label="mmu-miR-27a-3p (miRNA-mRNA) ENSMUSG00000004961" source="2838" target="2932" cy:directed="1"/>
      <edge id="39496" label="mmu-miR-27a-3p (miRNA-mRNA) ENSMUSG00000006494" source="2838" target="1001" cy:directed="1"/>
      <edge id="39495" label="mmu-miR-27a-3p (miRNA-mRNA) ENSMUSG00000004558" source="2838" target="1179" cy:directed="1"/>
      <edge id="39494" label="mmu-miR-27a-3p (miRNA-mRNA) ENSMUSG00000010505" source="2838" target="1002" cy:directed="1"/>
      <edge id="39493" label="mmu-miR-27a-3p (miRNA-mRNA) ENSMUSG00000007989" source="2838" target="162" cy:directed="1"/>
      <edge id="39492" label="mmu-miR-27a-3p (miRNA-mRNA) ENSMUSG00000002799" source="2838" target="130" cy:directed="1"/>
      <edge id="39491" label="mmu-miR-27a-3p (miRNA-mRNA) ENSMUSG00000002341" source="2838" target="1162" cy:directed="1"/>
      <edge id="39490" label="mmu-miR-27a-3p (miRNA-mRNA) ENSMUSG00000001435" source="2838" target="124" cy:directed="1"/>
      <edge id="39489" label="mmu-miR-27a-3p (miRNA-mRNA) ENSMUSG00000002885" source="2838" target="1073" cy:directed="1"/>
      <edge id="39488" label="mmu-miR-27a-3p (miRNA-mRNA) ENSMUSG00000002105" source="2838" target="1160" cy:directed="1"/>
      <edge id="39487" label="mmu-miR-27a-3p (miRNA-mRNA) ENSMUSG00000002107" source="2838" target="1161" cy:directed="1"/>
      <edge id="39486" label="mmu-miR-27a-3p (miRNA-mRNA) ENSMUSG00000000056" source="2838" target="114" cy:directed="1"/>
      <edge id="39485" label="mmu-miR-27a-3p (miRNA-mRNA) ENSMUSG00000002265" source="2838" target="994" cy:directed="1"/>
      <edge id="39484" label="mmu-miR-27a-3p (miRNA-mRNA) ENSMUSG00000001467" source="2838" target="1150" cy:directed="1"/>
      <edge id="39483" label="mmu-miR-27a-3p (miRNA-mRNA) ENSMUSG00000003541" source="2838" target="135" cy:directed="1"/>
      <edge id="39482" label="mmu-miR-27a-3p (miRNA-mRNA) ENSMUSG00000000555" source="2838" target="119" cy:directed="1"/>
      <edge id="39481" label="mmu-miR-152-3p (miRNA-mRNA) ENSMUSG00000070704" source="2837" target="2437" cy:directed="1"/>
      <edge id="39480" label="mmu-miR-152-3p (miRNA-mRNA) ENSMUSG00000060671" source="2837" target="2252" cy:directed="1"/>
      <edge id="39479" label="mmu-miR-152-3p (miRNA-mRNA) ENSMUSG00000058672" source="2837" target="876" cy:directed="1"/>
      <edge id="39478" label="mmu-miR-152-3p (miRNA-mRNA) ENSMUSG00000068196" source="2837" target="920" cy:directed="1"/>
      <edge id="39477" label="mmu-miR-152-3p (miRNA-mRNA) ENSMUSG00000063229" source="2837" target="903" cy:directed="1"/>
      <edge id="39476" label="mmu-miR-152-3p (miRNA-mRNA) ENSMUSG00000068699" source="2837" target="923" cy:directed="1"/>
      <edge id="39475" label="mmu-miR-152-3p (miRNA-mRNA) ENSMUSG00000060301" source="2837" target="888" cy:directed="1"/>
      <edge id="39474" label="mmu-miR-152-3p (miRNA-mRNA) ENSMUSG00000069456" source="2837" target="2311" cy:directed="1"/>
      <edge id="39473" label="mmu-miR-152-3p (miRNA-mRNA) ENSMUSG00000064373" source="2837" target="2285" cy:directed="1"/>
      <edge id="39472" label="mmu-miR-152-3p (miRNA-mRNA) ENSMUSG00000060613" source="2837" target="2250" cy:directed="1"/>
      <edge id="39471" label="mmu-miR-152-3p (miRNA-mRNA) ENSMUSG00000063531" source="2837" target="905" cy:directed="1"/>
      <edge id="39470" label="mmu-miR-152-3p (miRNA-mRNA) ENSMUSG00000064225" source="2837" target="2282" cy:directed="1"/>
      <edge id="39469" label="mmu-miR-152-3p (miRNA-mRNA) ENSMUSG00000068587" source="2837" target="2306" cy:directed="1"/>
      <edge id="39468" label="mmu-miR-152-3p (miRNA-mRNA) ENSMUSG00000062078" source="2837" target="898" cy:directed="1"/>
      <edge id="39467" label="mmu-miR-152-3p (miRNA-mRNA) ENSMUSG00000059493" source="2837" target="881" cy:directed="1"/>
      <edge id="39466" label="mmu-miR-152-3p (miRNA-mRNA) ENSMUSG00000051579" source="2837" target="2154" cy:directed="1"/>
      <edge id="39465" label="mmu-miR-152-3p (miRNA-mRNA) ENSMUSG00000053460" source="2837" target="835" cy:directed="1"/>
      <edge id="39464" label="mmu-miR-152-3p (miRNA-mRNA) ENSMUSG00000054150" source="2837" target="843" cy:directed="1"/>
      <edge id="39463" label="mmu-miR-152-3p (miRNA-mRNA) ENSMUSG00000049044" source="2837" target="2120" cy:directed="1"/>
      <edge id="39462" label="mmu-miR-152-3p (miRNA-mRNA) ENSMUSG00000049807" source="2837" target="2126" cy:directed="1"/>
      <edge id="39461" label="mmu-miR-152-3p (miRNA-mRNA) ENSMUSG00000053080" source="2837" target="831" cy:directed="1"/>
      <edge id="39460" label="mmu-miR-152-3p (miRNA-mRNA) ENSMUSG00000047963" source="2837" target="2099" cy:directed="1"/>
      <edge id="39459" label="mmu-miR-152-3p (miRNA-mRNA) ENSMUSG00000052595" source="2837" target="2165" cy:directed="1"/>
      <edge id="39458" label="mmu-miR-152-3p (miRNA-mRNA) ENSMUSG00000048970" source="2837" target="794" cy:directed="1"/>
      <edge id="39457" label="mmu-miR-152-3p (miRNA-mRNA) ENSMUSG00000048279" source="2837" target="2107" cy:directed="1"/>
      <edge id="39456" label="mmu-miR-152-3p (miRNA-mRNA) ENSMUSG00000053470" source="2837" target="836" cy:directed="1"/>
      <edge id="39455" label="mmu-miR-152-3p (miRNA-mRNA) ENSMUSG00000051323" source="2837" target="2889" cy:directed="1"/>
      <edge id="39454" label="mmu-miR-152-3p (miRNA-mRNA) ENSMUSG00000052396" source="2837" target="2163" cy:directed="1"/>
      <edge id="39453" label="mmu-miR-152-3p (miRNA-mRNA) ENSMUSG00000048895" source="2837" target="1100" cy:directed="1"/>
      <edge id="39452" label="mmu-miR-152-3p (miRNA-mRNA) ENSMUSG00000042686" source="2837" target="2016" cy:directed="1"/>
      <edge id="39451" label="mmu-miR-152-3p (miRNA-mRNA) ENSMUSG00000041741" source="2837" target="2881" cy:directed="1"/>
      <edge id="39450" label="mmu-miR-152-3p (miRNA-mRNA) ENSMUSG00000044068" source="2837" target="3112" cy:directed="1"/>
      <edge id="39449" label="mmu-miR-152-3p (miRNA-mRNA) ENSMUSG00000042271" source="2837" target="2008" cy:directed="1"/>
      <edge id="39448" label="mmu-miR-152-3p (miRNA-mRNA) ENSMUSG00000045838" source="2837" target="1053" cy:directed="1"/>
      <edge id="39447" label="mmu-miR-152-3p (miRNA-mRNA) ENSMUSG00000045294" source="2837" target="753" cy:directed="1"/>
      <edge id="39446" label="mmu-miR-152-3p (miRNA-mRNA) ENSMUSG00000042515" source="2837" target="2013" cy:directed="1"/>
      <edge id="39445" label="mmu-miR-152-3p (miRNA-mRNA) ENSMUSG00000045005" source="2837" target="2886" cy:directed="1"/>
      <edge id="39444" label="mmu-miR-152-3p (miRNA-mRNA) ENSMUSG00000041570" source="2837" target="710" cy:directed="1"/>
      <edge id="39443" label="mmu-miR-152-3p (miRNA-mRNA) ENSMUSG00000044254" source="2837" target="742" cy:directed="1"/>
      <edge id="39442" label="mmu-miR-152-3p (miRNA-mRNA) ENSMUSG00000040433" source="2837" target="687" cy:directed="1"/>
      <edge id="39441" label="mmu-miR-152-3p (miRNA-mRNA) ENSMUSG00000042035" source="2837" target="716" cy:directed="1"/>
      <edge id="39440" label="mmu-miR-152-3p (miRNA-mRNA) ENSMUSG00000041298" source="2837" target="2925" cy:directed="1"/>
      <edge id="39439" label="mmu-miR-152-3p (miRNA-mRNA) ENSMUSG00000043154" source="2837" target="735" cy:directed="1"/>
      <edge id="39438" label="mmu-miR-152-3p (miRNA-mRNA) ENSMUSG00000042834" source="2837" target="2576" cy:directed="1"/>
      <edge id="39437" label="mmu-miR-152-3p (miRNA-mRNA) ENSMUSG00000041058" source="2837" target="698" cy:directed="1"/>
      <edge id="39436" label="mmu-miR-152-3p (miRNA-mRNA) ENSMUSG00000042500" source="2837" target="2011" cy:directed="1"/>
      <edge id="39435" label="mmu-miR-152-3p (miRNA-mRNA) ENSMUSG00000042675" source="2837" target="731" cy:directed="1"/>
      <edge id="39434" label="mmu-miR-152-3p (miRNA-mRNA) ENSMUSG00000038181" source="2837" target="1905" cy:directed="1"/>
      <edge id="39433" label="mmu-miR-152-3p (miRNA-mRNA) ENSMUSG00000039126" source="2837" target="666" cy:directed="1"/>
      <edge id="39432" label="mmu-miR-152-3p (miRNA-mRNA) ENSMUSG00000039967" source="2837" target="1957" cy:directed="1"/>
      <edge id="39431" label="mmu-miR-152-3p (miRNA-mRNA) ENSMUSG00000040118" source="2837" target="1960" cy:directed="1"/>
      <edge id="39430" label="mmu-miR-152-3p (miRNA-mRNA) ENSMUSG00000039384" source="2837" target="1943" cy:directed="1"/>
      <edge id="39429" label="mmu-miR-152-3p (miRNA-mRNA) ENSMUSG00000037071" source="2837" target="616" cy:directed="1"/>
      <edge id="39428" label="mmu-miR-152-3p (miRNA-mRNA) ENSMUSG00000040249" source="2837" target="105" cy:directed="1"/>
      <edge id="39427" label="mmu-miR-152-3p (miRNA-mRNA) ENSMUSG00000038545" source="2837" target="3111" cy:directed="1"/>
      <edge id="39426" label="mmu-miR-152-3p (miRNA-mRNA) ENSMUSG00000038793" source="2837" target="3098" cy:directed="1"/>
      <edge id="39425" label="mmu-miR-152-3p (miRNA-mRNA) ENSMUSG00000040351" source="2837" target="684" cy:directed="1"/>
      <edge id="39424" label="mmu-miR-152-3p (miRNA-mRNA) ENSMUSG00000037942" source="2837" target="1897" cy:directed="1"/>
      <edge id="39423" label="mmu-miR-152-3p (miRNA-mRNA) ENSMUSG00000039740" source="2837" target="674" cy:directed="1"/>
      <edge id="39422" label="mmu-miR-152-3p (miRNA-mRNA) ENSMUSG00000039005" source="2837" target="1045" cy:directed="1"/>
      <edge id="39421" label="mmu-miR-152-3p (miRNA-mRNA) ENSMUSG00000037972" source="2837" target="642" cy:directed="1"/>
      <edge id="39420" label="mmu-miR-152-3p (miRNA-mRNA) ENSMUSG00000037035" source="2837" target="1882" cy:directed="1"/>
      <edge id="39419" label="mmu-miR-152-3p (miRNA-mRNA) ENSMUSG00000033209" source="2837" target="557" cy:directed="1"/>
      <edge id="39418" label="mmu-miR-152-3p (miRNA-mRNA) ENSMUSG00000036880" source="2837" target="1877" cy:directed="1"/>
      <edge id="39417" label="mmu-miR-152-3p (miRNA-mRNA) ENSMUSG00000033684" source="2837" target="1807" cy:directed="1"/>
      <edge id="39416" label="mmu-miR-152-3p (miRNA-mRNA) ENSMUSG00000035181" source="2837" target="589" cy:directed="1"/>
      <edge id="39415" label="mmu-miR-152-3p (miRNA-mRNA) ENSMUSG00000034875" source="2837" target="3110" cy:directed="1"/>
      <edge id="39414" label="mmu-miR-152-3p (miRNA-mRNA) ENSMUSG00000036473" source="2837" target="2873" cy:directed="1"/>
      <edge id="39413" label="mmu-miR-152-3p (miRNA-mRNA) ENSMUSG00000033149" source="2837" target="2985" cy:directed="1"/>
      <edge id="39412" label="mmu-miR-152-3p (miRNA-mRNA) ENSMUSG00000032855" source="2837" target="1784" cy:directed="1"/>
      <edge id="39411" label="mmu-miR-152-3p (miRNA-mRNA) ENSMUSG00000035811" source="2837" target="1848" cy:directed="1"/>
      <edge id="39410" label="mmu-miR-152-3p (miRNA-mRNA) ENSMUSG00000033105" source="2837" target="554" cy:directed="1"/>
      <edge id="39409" label="mmu-miR-152-3p (miRNA-mRNA) ENSMUSG00000034640" source="2837" target="2907" cy:directed="1"/>
      <edge id="39408" label="mmu-miR-152-3p (miRNA-mRNA) ENSMUSG00000036427" source="2837" target="3072" cy:directed="1"/>
      <edge id="39407" label="mmu-miR-152-3p (miRNA-mRNA) ENSMUSG00000034724" source="2837" target="1826" cy:directed="1"/>
      <edge id="39406" label="mmu-miR-152-3p (miRNA-mRNA) ENSMUSG00000035164" source="2837" target="588" cy:directed="1"/>
      <edge id="39405" label="mmu-miR-152-3p (miRNA-mRNA) ENSMUSG00000034663" source="2837" target="1823" cy:directed="1"/>
      <edge id="39404" label="mmu-miR-152-3p (miRNA-mRNA) ENSMUSG00000034111" source="2837" target="2871" cy:directed="1"/>
      <edge id="39403" label="mmu-miR-152-3p (miRNA-mRNA) ENSMUSG00000035158" source="2837" target="99" cy:directed="1"/>
      <edge id="39402" label="mmu-miR-152-3p (miRNA-mRNA) ENSMUSG00000032086" source="2837" target="2561" cy:directed="1"/>
      <edge id="39401" label="mmu-miR-152-3p (miRNA-mRNA) ENSMUSG00000032733" source="2837" target="543" cy:directed="1"/>
      <edge id="39400" label="mmu-miR-152-3p (miRNA-mRNA) ENSMUSG00000031782" source="2837" target="2922" cy:directed="1"/>
      <edge id="39399" label="mmu-miR-152-3p (miRNA-mRNA) ENSMUSG00000031207" source="2837" target="1704" cy:directed="1"/>
      <edge id="39398" label="mmu-miR-152-3p (miRNA-mRNA) ENSMUSG00000032656" source="2837" target="541" cy:directed="1"/>
      <edge id="39397" label="mmu-miR-152-3p (miRNA-mRNA) ENSMUSG00000031903" source="2837" target="520" cy:directed="1"/>
      <edge id="39396" label="mmu-miR-152-3p (miRNA-mRNA) ENSMUSG00000030353" source="2837" target="1681" cy:directed="1"/>
      <edge id="39395" label="mmu-miR-152-3p (miRNA-mRNA) ENSMUSG00000031482" source="2837" target="2982" cy:directed="1"/>
      <edge id="39394" label="mmu-miR-152-3p (miRNA-mRNA) ENSMUSG00000030087" source="2837" target="480" cy:directed="1"/>
      <edge id="39393" label="mmu-miR-152-3p (miRNA-mRNA) ENSMUSG00000032411" source="2837" target="535" cy:directed="1"/>
      <edge id="39392" label="mmu-miR-152-3p (miRNA-mRNA) ENSMUSG00000031767" source="2837" target="1730" cy:directed="1"/>
      <edge id="39391" label="mmu-miR-152-3p (miRNA-mRNA) ENSMUSG00000031561" source="2837" target="2921" cy:directed="1"/>
      <edge id="39390" label="mmu-miR-152-3p (miRNA-mRNA) ENSMUSG00000031833" source="2837" target="1732" cy:directed="1"/>
      <edge id="39389" label="mmu-miR-152-3p (miRNA-mRNA) ENSMUSG00000030946" source="2837" target="3099" cy:directed="1"/>
      <edge id="39388" label="mmu-miR-152-3p (miRNA-mRNA) ENSMUSG00000031129" source="2837" target="1700" cy:directed="1"/>
      <edge id="39387" label="mmu-miR-152-3p (miRNA-mRNA) ENSMUSG00000032740" source="2837" target="544" cy:directed="1"/>
      <edge id="39386" label="mmu-miR-152-3p (miRNA-mRNA) ENSMUSG00000027346" source="2837" target="1561" cy:directed="1"/>
      <edge id="39385" label="mmu-miR-152-3p (miRNA-mRNA) ENSMUSG00000029201" source="2837" target="2897" cy:directed="1"/>
      <edge id="39384" label="mmu-miR-152-3p (miRNA-mRNA) ENSMUSG00000029195" source="2837" target="1636" cy:directed="1"/>
      <edge id="39383" label="mmu-miR-152-3p (miRNA-mRNA) ENSMUSG00000029260" source="2837" target="1638" cy:directed="1"/>
      <edge id="39382" label="mmu-miR-152-3p (miRNA-mRNA) ENSMUSG00000029859" source="2837" target="3058" cy:directed="1"/>
      <edge id="39381" label="mmu-miR-152-3p (miRNA-mRNA) ENSMUSG00000028737" source="2837" target="2948" cy:directed="1"/>
      <edge id="39380" label="mmu-miR-152-3p (miRNA-mRNA) ENSMUSG00000028655" source="2837" target="2947" cy:directed="1"/>
      <edge id="39379" label="mmu-miR-152-3p (miRNA-mRNA) ENSMUSG00000028327" source="2837" target="1609" cy:directed="1"/>
      <edge id="39378" label="mmu-miR-152-3p (miRNA-mRNA) ENSMUSG00000028403" source="2837" target="2430" cy:directed="1"/>
      <edge id="39377" label="mmu-miR-152-3p (miRNA-mRNA) ENSMUSG00000027698" source="2837" target="419" cy:directed="1"/>
      <edge id="39376" label="mmu-miR-152-3p (miRNA-mRNA) ENSMUSG00000028211" source="2837" target="432" cy:directed="1"/>
      <edge id="39375" label="mmu-miR-152-3p (miRNA-mRNA) ENSMUSG00000027175" source="2837" target="1553" cy:directed="1"/>
      <edge id="39374" label="mmu-miR-152-3p (miRNA-mRNA) ENSMUSG00000028698" source="2837" target="2950" cy:directed="1"/>
      <edge id="39373" label="mmu-miR-152-3p (miRNA-mRNA) ENSMUSG00000029156" source="2837" target="1632" cy:directed="1"/>
      <edge id="39372" label="mmu-miR-152-3p (miRNA-mRNA) ENSMUSG00000024512" source="2837" target="1431" cy:directed="1"/>
      <edge id="39371" label="mmu-miR-152-3p (miRNA-mRNA) ENSMUSG00000025402" source="2837" target="1111" cy:directed="1"/>
      <edge id="39370" label="mmu-miR-152-3p (miRNA-mRNA) ENSMUSG00000026482" source="2837" target="386" cy:directed="1"/>
      <edge id="39369" label="mmu-miR-152-3p (miRNA-mRNA) ENSMUSG00000025969" source="2837" target="375" cy:directed="1"/>
      <edge id="39368" label="mmu-miR-152-3p (miRNA-mRNA) ENSMUSG00000025484" source="2837" target="2916" cy:directed="1"/>
      <edge id="39367" label="mmu-miR-152-3p (miRNA-mRNA) ENSMUSG00000026605" source="2837" target="393" cy:directed="1"/>
      <edge id="39366" label="mmu-miR-152-3p (miRNA-mRNA) ENSMUSG00000025198" source="2837" target="1469" cy:directed="1"/>
      <edge id="39365" label="mmu-miR-152-3p (miRNA-mRNA) ENSMUSG00000026617" source="2837" target="2493" cy:directed="1"/>
      <edge id="39364" label="mmu-miR-152-3p (miRNA-mRNA) ENSMUSG00000026604" source="2837" target="392" cy:directed="1"/>
      <edge id="39363" label="mmu-miR-152-3p (miRNA-mRNA) ENSMUSG00000025959" source="2837" target="374" cy:directed="1"/>
      <edge id="39362" label="mmu-miR-152-3p (miRNA-mRNA) ENSMUSG00000024501" source="2837" target="1428" cy:directed="1"/>
      <edge id="39361" label="mmu-miR-152-3p (miRNA-mRNA) ENSMUSG00000026235" source="2837" target="2648" cy:directed="1"/>
      <edge id="39360" label="mmu-miR-152-3p (miRNA-mRNA) ENSMUSG00000023800" source="2837" target="313" cy:directed="1"/>
      <edge id="39359" label="mmu-miR-152-3p (miRNA-mRNA) ENSMUSG00000026657" source="2837" target="2454" cy:directed="1"/>
      <edge id="39358" label="mmu-miR-152-3p (miRNA-mRNA) ENSMUSG00000026782" source="2837" target="396" cy:directed="1"/>
      <edge id="39357" label="mmu-miR-152-3p (miRNA-mRNA) ENSMUSG00000024302" source="2837" target="1419" cy:directed="1"/>
      <edge id="39356" label="mmu-miR-152-3p (miRNA-mRNA) ENSMUSG00000025582" source="2837" target="1488" cy:directed="1"/>
      <edge id="39355" label="mmu-miR-152-3p (miRNA-mRNA) ENSMUSG00000021701" source="2837" target="264" cy:directed="1"/>
      <edge id="39354" label="mmu-miR-152-3p (miRNA-mRNA) ENSMUSG00000021806" source="2837" target="266" cy:directed="1"/>
      <edge id="39353" label="mmu-miR-152-3p (miRNA-mRNA) ENSMUSG00000022477" source="2837" target="1364" cy:directed="1"/>
      <edge id="39352" label="mmu-miR-152-3p (miRNA-mRNA) ENSMUSG00000022742" source="2837" target="294" cy:directed="1"/>
      <edge id="39351" label="mmu-miR-152-3p (miRNA-mRNA) ENSMUSG00000021957" source="2837" target="271" cy:directed="1"/>
      <edge id="39350" label="mmu-miR-152-3p (miRNA-mRNA) ENSMUSG00000022995" source="2837" target="302" cy:directed="1"/>
      <edge id="39349" label="mmu-miR-152-3p (miRNA-mRNA) ENSMUSG00000021453" source="2837" target="1325" cy:directed="1"/>
      <edge id="39348" label="mmu-miR-152-3p (miRNA-mRNA) ENSMUSG00000022419" source="2837" target="2852" cy:directed="1"/>
      <edge id="39347" label="mmu-miR-152-3p (miRNA-mRNA) ENSMUSG00000021367" source="2837" target="259" cy:directed="1"/>
      <edge id="39346" label="mmu-miR-152-3p (miRNA-mRNA) ENSMUSG00000022094" source="2837" target="275" cy:directed="1"/>
      <edge id="39345" label="mmu-miR-152-3p (miRNA-mRNA) ENSMUSG00000022178" source="2837" target="278" cy:directed="1"/>
      <edge id="39344" label="mmu-miR-152-3p (miRNA-mRNA) ENSMUSG00000022528" source="2837" target="101" cy:directed="1"/>
      <edge id="39343" label="mmu-miR-152-3p (miRNA-mRNA) ENSMUSG00000022637" source="2837" target="292" cy:directed="1"/>
      <edge id="39342" label="mmu-miR-152-3p (miRNA-mRNA) ENSMUSG00000018983" source="2837" target="208" cy:directed="1"/>
      <edge id="39341" label="mmu-miR-152-3p (miRNA-mRNA) ENSMUSG00000015745" source="2837" target="1076" cy:directed="1"/>
      <edge id="39340" label="mmu-miR-152-3p (miRNA-mRNA) ENSMUSG00000020009" source="2837" target="222" cy:directed="1"/>
      <edge id="39339" label="mmu-miR-152-3p (miRNA-mRNA) ENSMUSG00000019087" source="2837" target="209" cy:directed="1"/>
      <edge id="39338" label="mmu-miR-152-3p (miRNA-mRNA) ENSMUSG00000016534" source="2837" target="1235" cy:directed="1"/>
      <edge id="39337" label="mmu-miR-152-3p (miRNA-mRNA) ENSMUSG00000014905" source="2837" target="2857" cy:directed="1"/>
      <edge id="39336" label="mmu-miR-152-3p (miRNA-mRNA) ENSMUSG00000018501" source="2837" target="84" cy:directed="1"/>
      <edge id="39335" label="mmu-miR-152-3p (miRNA-mRNA) ENSMUSG00000020674" source="2837" target="239" cy:directed="1"/>
      <edge id="39334" label="mmu-miR-152-3p (miRNA-mRNA) ENSMUSG00000020150" source="2837" target="2424" cy:directed="1"/>
      <edge id="39333" label="mmu-miR-152-3p (miRNA-mRNA) ENSMUSG00000020455" source="2837" target="96" cy:directed="1"/>
      <edge id="39332" label="mmu-miR-152-3p (miRNA-mRNA) ENSMUSG00000015112" source="2837" target="179" cy:directed="1"/>
      <edge id="39331" label="mmu-miR-152-3p (miRNA-mRNA) ENSMUSG00000020101" source="2837" target="2974" cy:directed="1"/>
      <edge id="39330" label="mmu-miR-152-3p (miRNA-mRNA) ENSMUSG00000014303" source="2837" target="175" cy:directed="1"/>
      <edge id="39329" label="mmu-miR-152-3p (miRNA-mRNA) ENSMUSG00000017950" source="2837" target="81" cy:directed="1"/>
      <edge id="39328" label="mmu-miR-152-3p (miRNA-mRNA) ENSMUSG00000016541" source="2837" target="1236" cy:directed="1"/>
      <edge id="39327" label="mmu-miR-152-3p (miRNA-mRNA) ENSMUSG00000020258" source="2837" target="2935" cy:directed="1"/>
      <edge id="39326" label="mmu-miR-152-3p (miRNA-mRNA) ENSMUSG00000006281" source="2837" target="3097" cy:directed="1"/>
      <edge id="39325" label="mmu-miR-152-3p (miRNA-mRNA) ENSMUSG00000001473" source="2837" target="125" cy:directed="1"/>
      <edge id="39324" label="mmu-miR-152-3p (miRNA-mRNA) ENSMUSG00000000567" source="2837" target="113" cy:directed="1"/>
      <edge id="39323" label="mmu-miR-152-3p (miRNA-mRNA) ENSMUSG00000002265" source="2837" target="994" cy:directed="1"/>
      <edge id="39322" label="mmu-miR-152-3p (miRNA-mRNA) ENSMUSG00000004270" source="2837" target="139" cy:directed="1"/>
      <edge id="39321" label="mmu-miR-152-3p (miRNA-mRNA) ENSMUSG00000004038" source="2837" target="1176" cy:directed="1"/>
      <edge id="39320" label="mmu-miR-152-3p (miRNA-mRNA) ENSMUSG00000002105" source="2837" target="1160" cy:directed="1"/>
      <edge id="39319" label="mmu-miR-152-3p (miRNA-mRNA) ENSMUSG00000002107" source="2837" target="1161" cy:directed="1"/>
      <edge id="39318" label="mmu-miR-152-3p (miRNA-mRNA) ENSMUSG00000008734" source="2837" target="164" cy:directed="1"/>
      <edge id="39317" label="mmu-miR-152-3p (miRNA-mRNA) ENSMUSG00000003518" source="2837" target="2970" cy:directed="1"/>
      <edge id="39316" label="mmu-miR-152-3p (miRNA-mRNA) ENSMUSG00000004880" source="2837" target="1182" cy:directed="1"/>
      <edge id="39315" label="mmu-miR-152-3p (miRNA-mRNA) ENSMUSG00000000555" source="2837" target="119" cy:directed="1"/>
      <edge id="39314" label="ENSMUSG00000097131 (lincRNA-miRNA) mmu-miR-205-5p" source="2836" target="2835" cy:directed="1"/>
      <edge id="39313" label="mmu-miR-205-5p (miRNA-mRNA) ENSMUSG00000019986" source="2835" target="220" cy:directed="1"/>
      <edge id="39312" label="mmu-miR-205-5p (miRNA-mRNA) ENSMUSG00000059554" source="2835" target="2893" cy:directed="1"/>
      <edge id="39311" label="mmu-miR-205-5p (miRNA-mRNA) ENSMUSG00000031586" source="2835" target="509" cy:directed="1"/>
      <edge id="39310" label="mmu-miR-205-5p (miRNA-mRNA) ENSMUSG00000025959" source="2835" target="374" cy:directed="1"/>
      <edge id="39309" label="mmu-miR-99a-5p (miRNA-mRNA) ENSMUSG00000025959" source="2834" target="374" cy:directed="1"/>
      <edge id="39308" label="mmu-miR-99a-5p (miRNA-mRNA) ENSMUSG00000047747" source="2834" target="779" cy:directed="1"/>
      <edge id="39307" label="mmu-miR-99a-5p (miRNA-mRNA) ENSMUSG00000021608" source="2834" target="1330" cy:directed="1"/>
      <edge id="39306" label="mmu-miR-99a-5p (miRNA-mRNA) ENSMUSG00000039081" source="2834" target="1930" cy:directed="1"/>
      <edge id="39305" label="mmu-miR-99a-5p (miRNA-mRNA) ENSMUSG00000005958" source="2834" target="151" cy:directed="1"/>
      <edge id="39304" label="mmu-miR-99a-5p (miRNA-mRNA) ENSMUSG00000022656" source="2834" target="1377" cy:directed="1"/>
      <edge id="39303" label="mmu-miR-99a-5p (miRNA-mRNA) ENSMUSG00000033379" source="2834" target="561" cy:directed="1"/>
      <edge id="39302" label="mmu-miR-99a-5p (miRNA-mRNA) ENSMUSG00000037818" source="2834" target="2906" cy:directed="1"/>
      <edge id="39301" label="mmu-miR-99a-5p (miRNA-mRNA) ENSMUSG00000045005" source="2834" target="2886" cy:directed="1"/>
      <edge id="39300" label="mmu-miR-99a-5p (miRNA-mRNA) ENSMUSG00000065979" source="2834" target="3036" cy:directed="1"/>
      <edge id="39299" label="mmu-miR-218-5p (miRNA-mRNA) ENSMUSG00000055485" source="2833" target="2198" cy:directed="1"/>
      <edge id="39298" label="mmu-miR-218-5p (miRNA-mRNA) ENSMUSG00000057315" source="2833" target="3107" cy:directed="1"/>
      <edge id="39297" label="mmu-miR-218-5p (miRNA-mRNA) ENSMUSG00000058706" source="2833" target="2998" cy:directed="1"/>
      <edge id="39296" label="mmu-miR-218-5p (miRNA-mRNA) ENSMUSG00000067818" source="2833" target="2299" cy:directed="1"/>
      <edge id="39295" label="mmu-miR-218-5p (miRNA-mRNA) ENSMUSG00000060301" source="2833" target="888" cy:directed="1"/>
      <edge id="39294" label="mmu-miR-218-5p (miRNA-mRNA) ENSMUSG00000057789" source="2833" target="2623" cy:directed="1"/>
      <edge id="39293" label="mmu-miR-218-5p (miRNA-mRNA) ENSMUSG00000058756" source="2833" target="80" cy:directed="1"/>
      <edge id="39292" label="mmu-miR-218-5p (miRNA-mRNA) ENSMUSG00000055980" source="2833" target="859" cy:directed="1"/>
      <edge id="39291" label="mmu-miR-218-5p (miRNA-mRNA) ENSMUSG00000064080" source="2833" target="2277" cy:directed="1"/>
      <edge id="39290" label="mmu-miR-218-5p (miRNA-mRNA) ENSMUSG00000063160" source="2833" target="2997" cy:directed="1"/>
      <edge id="39289" label="mmu-miR-218-5p (miRNA-mRNA) ENSMUSG00000048583" source="2833" target="2538" cy:directed="1"/>
      <edge id="39288" label="mmu-miR-218-5p (miRNA-mRNA) ENSMUSG00000048895" source="2833" target="1100" cy:directed="1"/>
      <edge id="39287" label="mmu-miR-218-5p (miRNA-mRNA) ENSMUSG00000049866" source="2833" target="805" cy:directed="1"/>
      <edge id="39286" label="mmu-miR-218-5p (miRNA-mRNA) ENSMUSG00000048376" source="2833" target="787" cy:directed="1"/>
      <edge id="39285" label="mmu-miR-218-5p (miRNA-mRNA) ENSMUSG00000049878" source="2833" target="806" cy:directed="1"/>
      <edge id="39284" label="mmu-miR-218-5p (miRNA-mRNA) ENSMUSG00000046743" source="2833" target="2990" cy:directed="1"/>
      <edge id="39283" label="mmu-miR-218-5p (miRNA-mRNA) ENSMUSG00000048279" source="2833" target="2107" cy:directed="1"/>
      <edge id="39282" label="mmu-miR-218-5p (miRNA-mRNA) ENSMUSG00000053617" source="2833" target="2175" cy:directed="1"/>
      <edge id="39281" label="mmu-miR-218-5p (miRNA-mRNA) ENSMUSG00000046432" source="2833" target="2514" cy:directed="1"/>
      <edge id="39280" label="mmu-miR-218-5p (miRNA-mRNA) ENSMUSG00000049532" source="2833" target="2124" cy:directed="1"/>
      <edge id="39279" label="mmu-miR-218-5p (miRNA-mRNA) ENSMUSG00000050240" source="2833" target="2133" cy:directed="1"/>
      <edge id="39278" label="mmu-miR-218-5p (miRNA-mRNA) ENSMUSG00000046179" source="2833" target="2887" cy:directed="1"/>
      <edge id="39277" label="mmu-miR-218-5p (miRNA-mRNA) ENSMUSG00000050064" source="2833" target="807" cy:directed="1"/>
      <edge id="39276" label="mmu-miR-218-5p (miRNA-mRNA) ENSMUSG00000047205" source="2833" target="775" cy:directed="1"/>
      <edge id="39275" label="mmu-miR-218-5p (miRNA-mRNA) ENSMUSG00000049791" source="2833" target="2671" cy:directed="1"/>
      <edge id="39274" label="mmu-miR-218-5p (miRNA-mRNA) ENSMUSG00000046668" source="2833" target="770" cy:directed="1"/>
      <edge id="39273" label="mmu-miR-218-5p (miRNA-mRNA) ENSMUSG00000050965" source="2833" target="2850" cy:directed="1"/>
      <edge id="39272" label="mmu-miR-218-5p (miRNA-mRNA) ENSMUSG00000050953" source="2833" target="816" cy:directed="1"/>
      <edge id="39271" label="mmu-miR-218-5p (miRNA-mRNA) ENSMUSG00000045838" source="2833" target="1053" cy:directed="1"/>
      <edge id="39270" label="mmu-miR-218-5p (miRNA-mRNA) ENSMUSG00000048911" source="2833" target="2117" cy:directed="1"/>
      <edge id="39269" label="mmu-miR-218-5p (miRNA-mRNA) ENSMUSG00000047875" source="2833" target="2098" cy:directed="1"/>
      <edge id="39268" label="mmu-miR-218-5p (miRNA-mRNA) ENSMUSG00000053580" source="2833" target="837" cy:directed="1"/>
      <edge id="39267" label="mmu-miR-218-5p (miRNA-mRNA) ENSMUSG00000050148" source="2833" target="809" cy:directed="1"/>
      <edge id="39266" label="mmu-miR-218-5p (miRNA-mRNA) ENSMUSG00000042686" source="2833" target="2016" cy:directed="1"/>
      <edge id="39265" label="mmu-miR-218-5p (miRNA-mRNA) ENSMUSG00000040433" source="2833" target="687" cy:directed="1"/>
      <edge id="39264" label="mmu-miR-218-5p (miRNA-mRNA) ENSMUSG00000041642" source="2833" target="2883" cy:directed="1"/>
      <edge id="39263" label="mmu-miR-218-5p (miRNA-mRNA) ENSMUSG00000039967" source="2833" target="1957" cy:directed="1"/>
      <edge id="39262" label="mmu-miR-218-5p (miRNA-mRNA) ENSMUSG00000042271" source="2833" target="2008" cy:directed="1"/>
      <edge id="39261" label="mmu-miR-218-5p (miRNA-mRNA) ENSMUSG00000045382" source="2833" target="755" cy:directed="1"/>
      <edge id="39260" label="mmu-miR-218-5p (miRNA-mRNA) ENSMUSG00000042675" source="2833" target="731" cy:directed="1"/>
      <edge id="39259" label="mmu-miR-218-5p (miRNA-mRNA) ENSMUSG00000039943" source="2833" target="1955" cy:directed="1"/>
      <edge id="39258" label="mmu-miR-218-5p (miRNA-mRNA) ENSMUSG00000044646" source="2833" target="747" cy:directed="1"/>
      <edge id="39257" label="mmu-miR-218-5p (miRNA-mRNA) ENSMUSG00000043639" source="2833" target="1051" cy:directed="1"/>
      <edge id="39256" label="mmu-miR-218-5p (miRNA-mRNA) ENSMUSG00000043154" source="2833" target="735" cy:directed="1"/>
      <edge id="39255" label="mmu-miR-218-5p (miRNA-mRNA) ENSMUSG00000041189" source="2833" target="3070" cy:directed="1"/>
      <edge id="39254" label="mmu-miR-218-5p (miRNA-mRNA) ENSMUSG00000045312" source="2833" target="2057" cy:directed="1"/>
      <edge id="39253" label="mmu-miR-218-5p (miRNA-mRNA) ENSMUSG00000041741" source="2833" target="2881" cy:directed="1"/>
      <edge id="39252" label="mmu-miR-218-5p (miRNA-mRNA) ENSMUSG00000039911" source="2833" target="678" cy:directed="1"/>
      <edge id="39251" label="mmu-miR-218-5p (miRNA-mRNA) ENSMUSG00000042115" source="2833" target="721" cy:directed="1"/>
      <edge id="39250" label="mmu-miR-218-5p (miRNA-mRNA) ENSMUSG00000042523" source="2833" target="2014" cy:directed="1"/>
      <edge id="39249" label="mmu-miR-218-5p (miRNA-mRNA) ENSMUSG00000040990" source="2833" target="1981" cy:directed="1"/>
      <edge id="39248" label="mmu-miR-218-5p (miRNA-mRNA) ENSMUSG00000043391" source="2833" target="2029" cy:directed="1"/>
      <edge id="39247" label="mmu-miR-218-5p (miRNA-mRNA) ENSMUSG00000038884" source="2833" target="659" cy:directed="1"/>
      <edge id="39246" label="mmu-miR-218-5p (miRNA-mRNA) ENSMUSG00000039384" source="2833" target="1943" cy:directed="1"/>
      <edge id="39245" label="mmu-miR-218-5p (miRNA-mRNA) ENSMUSG00000038253" source="2833" target="2668" cy:directed="1"/>
      <edge id="39244" label="mmu-miR-218-5p (miRNA-mRNA) ENSMUSG00000036745" source="2833" target="607" cy:directed="1"/>
      <edge id="39243" label="mmu-miR-218-5p (miRNA-mRNA) ENSMUSG00000039087" source="2833" target="665" cy:directed="1"/>
      <edge id="39242" label="mmu-miR-218-5p (miRNA-mRNA) ENSMUSG00000038371" source="2833" target="1908" cy:directed="1"/>
      <edge id="39241" label="mmu-miR-218-5p (miRNA-mRNA) ENSMUSG00000037820" source="2833" target="638" cy:directed="1"/>
      <edge id="39240" label="mmu-miR-218-5p (miRNA-mRNA) ENSMUSG00000037235" source="2833" target="619" cy:directed="1"/>
      <edge id="39239" label="mmu-miR-218-5p (miRNA-mRNA) ENSMUSG00000036667" source="2833" target="606" cy:directed="1"/>
      <edge id="39238" label="mmu-miR-218-5p (miRNA-mRNA) ENSMUSG00000039126" source="2833" target="666" cy:directed="1"/>
      <edge id="39237" label="mmu-miR-218-5p (miRNA-mRNA) ENSMUSG00000037035" source="2833" target="1882" cy:directed="1"/>
      <edge id="39236" label="mmu-miR-218-5p (miRNA-mRNA) ENSMUSG00000039116" source="2833" target="2878" cy:directed="1"/>
      <edge id="39235" label="mmu-miR-218-5p (miRNA-mRNA) ENSMUSG00000032855" source="2833" target="1784" cy:directed="1"/>
      <edge id="39234" label="mmu-miR-218-5p (miRNA-mRNA) ENSMUSG00000036181" source="2833" target="1859" cy:directed="1"/>
      <edge id="39233" label="mmu-miR-218-5p (miRNA-mRNA) ENSMUSG00000033685" source="2833" target="564" cy:directed="1"/>
      <edge id="39232" label="mmu-miR-218-5p (miRNA-mRNA) ENSMUSG00000034640" source="2833" target="2907" cy:directed="1"/>
      <edge id="39231" label="mmu-miR-218-5p (miRNA-mRNA) ENSMUSG00000036564" source="2833" target="1872" cy:directed="1"/>
      <edge id="39230" label="mmu-miR-218-5p (miRNA-mRNA) ENSMUSG00000032625" source="2833" target="1777" cy:directed="1"/>
      <edge id="39229" label="mmu-miR-218-5p (miRNA-mRNA) ENSMUSG00000033174" source="2833" target="3068" cy:directed="1"/>
      <edge id="39228" label="mmu-miR-218-5p (miRNA-mRNA) ENSMUSG00000033705" source="2833" target="565" cy:directed="1"/>
      <edge id="39227" label="mmu-miR-218-5p (miRNA-mRNA) ENSMUSG00000035504" source="2833" target="595" cy:directed="1"/>
      <edge id="39226" label="mmu-miR-218-5p (miRNA-mRNA) ENSMUSG00000033416" source="2833" target="2846" cy:directed="1"/>
      <edge id="39225" label="mmu-miR-218-5p (miRNA-mRNA) ENSMUSG00000035107" source="2833" target="587" cy:directed="1"/>
      <edge id="39224" label="mmu-miR-218-5p (miRNA-mRNA) ENSMUSG00000032740" source="2833" target="544" cy:directed="1"/>
      <edge id="39223" label="mmu-miR-218-5p (miRNA-mRNA) ENSMUSG00000035158" source="2833" target="99" cy:directed="1"/>
      <edge id="39222" label="mmu-miR-218-5p (miRNA-mRNA) ENSMUSG00000032035" source="2833" target="109" cy:directed="1"/>
      <edge id="39221" label="mmu-miR-218-5p (miRNA-mRNA) ENSMUSG00000031503" source="2833" target="3026" cy:directed="1"/>
      <edge id="39220" label="mmu-miR-218-5p (miRNA-mRNA) ENSMUSG00000029761" source="2833" target="1662" cy:directed="1"/>
      <edge id="39219" label="mmu-miR-218-5p (miRNA-mRNA) ENSMUSG00000032411" source="2833" target="535" cy:directed="1"/>
      <edge id="39218" label="mmu-miR-218-5p (miRNA-mRNA) ENSMUSG00000031925" source="2833" target="521" cy:directed="1"/>
      <edge id="39217" label="mmu-miR-218-5p (miRNA-mRNA) ENSMUSG00000031558" source="2833" target="1722" cy:directed="1"/>
      <edge id="39216" label="mmu-miR-218-5p (miRNA-mRNA) ENSMUSG00000030103" source="2833" target="2625" cy:directed="1"/>
      <edge id="39215" label="mmu-miR-218-5p (miRNA-mRNA) ENSMUSG00000031903" source="2833" target="520" cy:directed="1"/>
      <edge id="39214" label="mmu-miR-218-5p (miRNA-mRNA) ENSMUSG00000031004" source="2833" target="494" cy:directed="1"/>
      <edge id="39213" label="mmu-miR-218-5p (miRNA-mRNA) ENSMUSG00000032557" source="2833" target="3106" cy:directed="1"/>
      <edge id="39212" label="mmu-miR-218-5p (miRNA-mRNA) ENSMUSG00000031441" source="2833" target="505" cy:directed="1"/>
      <edge id="39211" label="mmu-miR-218-5p (miRNA-mRNA) ENSMUSG00000031902" source="2833" target="1740" cy:directed="1"/>
      <edge id="39210" label="mmu-miR-218-5p (miRNA-mRNA) ENSMUSG00000031668" source="2833" target="515" cy:directed="1"/>
      <edge id="39209" label="mmu-miR-218-5p (miRNA-mRNA) ENSMUSG00000028763" source="2833" target="453" cy:directed="1"/>
      <edge id="39208" label="mmu-miR-218-5p (miRNA-mRNA) ENSMUSG00000027326" source="2833" target="408" cy:directed="1"/>
      <edge id="39207" label="mmu-miR-218-5p (miRNA-mRNA) ENSMUSG00000026932" source="2833" target="1545" cy:directed="1"/>
      <edge id="39206" label="mmu-miR-218-5p (miRNA-mRNA) ENSMUSG00000029090" source="2833" target="3057" cy:directed="1"/>
      <edge id="39205" label="mmu-miR-218-5p (miRNA-mRNA) ENSMUSG00000027254" source="2833" target="1024" cy:directed="1"/>
      <edge id="39204" label="mmu-miR-218-5p (miRNA-mRNA) ENSMUSG00000028158" source="2833" target="1601" cy:directed="1"/>
      <edge id="39203" label="mmu-miR-218-5p (miRNA-mRNA) ENSMUSG00000028698" source="2833" target="2950" cy:directed="1"/>
      <edge id="39202" label="mmu-miR-218-5p (miRNA-mRNA) ENSMUSG00000029287" source="2833" target="1119" cy:directed="1"/>
      <edge id="39201" label="mmu-miR-218-5p (miRNA-mRNA) ENSMUSG00000028557" source="2833" target="443" cy:directed="1"/>
      <edge id="39200" label="mmu-miR-218-5p (miRNA-mRNA) ENSMUSG00000028211" source="2833" target="432" cy:directed="1"/>
      <edge id="39199" label="mmu-miR-218-5p (miRNA-mRNA) ENSMUSG00000027937" source="2833" target="1587" cy:directed="1"/>
      <edge id="39198" label="mmu-miR-218-5p (miRNA-mRNA) ENSMUSG00000028517" source="2833" target="441" cy:directed="1"/>
      <edge id="39197" label="mmu-miR-218-5p (miRNA-mRNA) ENSMUSG00000028631" source="2833" target="1618" cy:directed="1"/>
      <edge id="39196" label="mmu-miR-218-5p (miRNA-mRNA) ENSMUSG00000027220" source="2833" target="1556" cy:directed="1"/>
      <edge id="39195" label="mmu-miR-218-5p (miRNA-mRNA) ENSMUSG00000024887" source="2833" target="345" cy:directed="1"/>
      <edge id="39194" label="mmu-miR-218-5p (miRNA-mRNA) ENSMUSG00000026072" source="2833" target="377" cy:directed="1"/>
      <edge id="39193" label="mmu-miR-218-5p (miRNA-mRNA) ENSMUSG00000025085" source="2833" target="1460" cy:directed="1"/>
      <edge id="39192" label="mmu-miR-218-5p (miRNA-mRNA) ENSMUSG00000026796" source="2833" target="2976" cy:directed="1"/>
      <edge id="39191" label="mmu-miR-218-5p (miRNA-mRNA) ENSMUSG00000025969" source="2833" target="375" cy:directed="1"/>
      <edge id="39190" label="mmu-miR-218-5p (miRNA-mRNA) ENSMUSG00000026605" source="2833" target="393" cy:directed="1"/>
      <edge id="39189" label="mmu-miR-218-5p (miRNA-mRNA) ENSMUSG00000024501" source="2833" target="1428" cy:directed="1"/>
      <edge id="39188" label="mmu-miR-218-5p (miRNA-mRNA) ENSMUSG00000025348" source="2833" target="1475" cy:directed="1"/>
      <edge id="39187" label="mmu-miR-218-5p (miRNA-mRNA) ENSMUSG00000024978" source="2833" target="349" cy:directed="1"/>
      <edge id="39186" label="mmu-miR-218-5p (miRNA-mRNA) ENSMUSG00000025265" source="2833" target="1473" cy:directed="1"/>
      <edge id="39185" label="mmu-miR-218-5p (miRNA-mRNA) ENSMUSG00000026586" source="2833" target="1532" cy:directed="1"/>
      <edge id="39184" label="mmu-miR-218-5p (miRNA-mRNA) ENSMUSG00000026604" source="2833" target="392" cy:directed="1"/>
      <edge id="39183" label="mmu-miR-218-5p (miRNA-mRNA) ENSMUSG00000026797" source="2833" target="3005" cy:directed="1"/>
      <edge id="39182" label="mmu-miR-218-5p (miRNA-mRNA) ENSMUSG00000024431" source="2833" target="79" cy:directed="1"/>
      <edge id="39181" label="mmu-miR-218-5p (miRNA-mRNA) ENSMUSG00000026782" source="2833" target="396" cy:directed="1"/>
      <edge id="39180" label="mmu-miR-218-5p (miRNA-mRNA) ENSMUSG00000025037" source="2833" target="354" cy:directed="1"/>
      <edge id="39179" label="mmu-miR-218-5p (miRNA-mRNA) ENSMUSG00000024533" source="2833" target="1434" cy:directed="1"/>
      <edge id="39178" label="mmu-miR-218-5p (miRNA-mRNA) ENSMUSG00000026657" source="2833" target="2454" cy:directed="1"/>
      <edge id="39177" label="mmu-miR-218-5p (miRNA-mRNA) ENSMUSG00000024304" source="2833" target="1420" cy:directed="1"/>
      <edge id="39176" label="mmu-miR-218-5p (miRNA-mRNA) ENSMUSG00000025089" source="2833" target="355" cy:directed="1"/>
      <edge id="39175" label="mmu-miR-218-5p (miRNA-mRNA) ENSMUSG00000026223" source="2833" target="1512" cy:directed="1"/>
      <edge id="39174" label="mmu-miR-218-5p (miRNA-mRNA) ENSMUSG00000021215" source="2833" target="2861" cy:directed="1"/>
      <edge id="39173" label="mmu-miR-218-5p (miRNA-mRNA) ENSMUSG00000021203" source="2833" target="255" cy:directed="1"/>
      <edge id="39172" label="mmu-miR-218-5p (miRNA-mRNA) ENSMUSG00000021577" source="2833" target="2902" cy:directed="1"/>
      <edge id="39171" label="mmu-miR-218-5p (miRNA-mRNA) ENSMUSG00000022094" source="2833" target="275" cy:directed="1"/>
      <edge id="39170" label="mmu-miR-218-5p (miRNA-mRNA) ENSMUSG00000023243" source="2833" target="1396" cy:directed="1"/>
      <edge id="39169" label="mmu-miR-218-5p (miRNA-mRNA) ENSMUSG00000023800" source="2833" target="313" cy:directed="1"/>
      <edge id="39168" label="mmu-miR-218-5p (miRNA-mRNA) ENSMUSG00000022136" source="2833" target="276" cy:directed="1"/>
      <edge id="39167" label="mmu-miR-218-5p (miRNA-mRNA) ENSMUSG00000021175" source="2833" target="1316" cy:directed="1"/>
      <edge id="39166" label="mmu-miR-218-5p (miRNA-mRNA) ENSMUSG00000022637" source="2833" target="292" cy:directed="1"/>
      <edge id="39165" label="mmu-miR-218-5p (miRNA-mRNA) ENSMUSG00000019564" source="2833" target="212" cy:directed="1"/>
      <edge id="39164" label="mmu-miR-218-5p (miRNA-mRNA) ENSMUSG00000015745" source="2833" target="1076" cy:directed="1"/>
      <edge id="39163" label="mmu-miR-218-5p (miRNA-mRNA) ENSMUSG00000018199" source="2833" target="2858" cy:directed="1"/>
      <edge id="39162" label="mmu-miR-218-5p (miRNA-mRNA) ENSMUSG00000020674" source="2833" target="239" cy:directed="1"/>
      <edge id="39161" label="mmu-miR-218-5p (miRNA-mRNA) ENSMUSG00000018846" source="2833" target="1253" cy:directed="1"/>
      <edge id="39160" label="mmu-miR-218-5p (miRNA-mRNA) ENSMUSG00000020532" source="2833" target="1112" cy:directed="1"/>
      <edge id="39159" label="mmu-miR-218-5p (miRNA-mRNA) ENSMUSG00000020387" source="2833" target="232" cy:directed="1"/>
      <edge id="39158" label="mmu-miR-218-5p (miRNA-mRNA) ENSMUSG00000020572" source="2833" target="1298" cy:directed="1"/>
      <edge id="39157" label="mmu-miR-218-5p (miRNA-mRNA) ENSMUSG00000020015" source="2833" target="224" cy:directed="1"/>
      <edge id="39156" label="mmu-miR-218-5p (miRNA-mRNA) ENSMUSG00000020715" source="2833" target="240" cy:directed="1"/>
      <edge id="39155" label="mmu-miR-218-5p (miRNA-mRNA) ENSMUSG00000019647" source="2833" target="213" cy:directed="1"/>
      <edge id="39154" label="mmu-miR-218-5p (miRNA-mRNA) ENSMUSG00000016495" source="2833" target="3019" cy:directed="1"/>
      <edge id="39153" label="mmu-miR-218-5p (miRNA-mRNA) ENSMUSG00000002266" source="2833" target="995" cy:directed="1"/>
      <edge id="39152" label="mmu-miR-218-5p (miRNA-mRNA) ENSMUSG00000002105" source="2833" target="1160" cy:directed="1"/>
      <edge id="39151" label="mmu-miR-218-5p (miRNA-mRNA) ENSMUSG00000004789" source="2833" target="142" cy:directed="1"/>
      <edge id="39150" label="mmu-miR-218-5p (miRNA-mRNA) ENSMUSG00000010663" source="2833" target="1212" cy:directed="1"/>
      <edge id="39149" label="mmu-miR-218-5p (miRNA-mRNA) ENSMUSG00000013076" source="2833" target="2844" cy:directed="1"/>
      <edge id="39148" label="mmu-miR-218-5p (miRNA-mRNA) ENSMUSG00000006800" source="2833" target="1075" cy:directed="1"/>
      <edge id="39147" label="mmu-miR-29a-3p (miRNA-mRNA) ENSMUSG00000040351" source="2832" target="684" cy:directed="1"/>
      <edge id="39146" label="mmu-miR-29a-3p (miRNA-mRNA) ENSMUSG00000039967" source="2832" target="1957" cy:directed="1"/>
      <edge id="39145" label="mmu-miR-29a-3p (miRNA-mRNA) ENSMUSG00000045763" source="2832" target="2670" cy:directed="1"/>
      <edge id="39144" label="mmu-miR-29a-3p (miRNA-mRNA) ENSMUSG00000039899" source="2832" target="2678" cy:directed="1"/>
      <edge id="39143" label="mmu-miR-29a-3p (miRNA-mRNA) ENSMUSG00000048279" source="2832" target="2107" cy:directed="1"/>
      <edge id="39142" label="mmu-miR-29a-3p (miRNA-mRNA) ENSMUSG00000043004" source="2832" target="1050" cy:directed="1"/>
      <edge id="39141" label="mmu-miR-29a-3p (miRNA-mRNA) ENSMUSG00000046179" source="2832" target="2887" cy:directed="1"/>
      <edge id="39140" label="mmu-miR-29a-3p (miRNA-mRNA) ENSMUSG00000040747" source="2832" target="1978" cy:directed="1"/>
      <edge id="39139" label="mmu-miR-29a-3p (miRNA-mRNA) ENSMUSG00000051335" source="2832" target="2148" cy:directed="1"/>
      <edge id="39138" label="mmu-miR-29a-3p (miRNA-mRNA) ENSMUSG00000047604" source="2832" target="2086" cy:directed="1"/>
      <edge id="39137" label="mmu-miR-29a-3p (miRNA-mRNA) ENSMUSG00000045667" source="2832" target="2060" cy:directed="1"/>
      <edge id="39136" label="mmu-miR-29a-3p (miRNA-mRNA) ENSMUSG00000049878" source="2832" target="806" cy:directed="1"/>
      <edge id="39135" label="mmu-miR-29a-3p (miRNA-mRNA) ENSMUSG00000039384" source="2832" target="1943" cy:directed="1"/>
      <edge id="39134" label="mmu-miR-29a-3p (miRNA-mRNA) ENSMUSG00000037972" source="2832" target="642" cy:directed="1"/>
      <edge id="39133" label="mmu-miR-29a-3p (miRNA-mRNA) ENSMUSG00000032035" source="2832" target="109" cy:directed="1"/>
      <edge id="39132" label="mmu-miR-29a-3p (miRNA-mRNA) ENSMUSG00000037818" source="2832" target="2906" cy:directed="1"/>
      <edge id="39131" label="mmu-miR-29a-3p (miRNA-mRNA) ENSMUSG00000034663" source="2832" target="1823" cy:directed="1"/>
      <edge id="39130" label="mmu-miR-29a-3p (miRNA-mRNA) ENSMUSG00000034858" source="2832" target="1036" cy:directed="1"/>
      <edge id="39129" label="mmu-miR-29a-3p (miRNA-mRNA) ENSMUSG00000035239" source="2832" target="1835" cy:directed="1"/>
      <edge id="39128" label="mmu-miR-29a-3p (miRNA-mRNA) ENSMUSG00000032902" source="2832" target="1787" cy:directed="1"/>
      <edge id="39127" label="mmu-miR-29a-3p (miRNA-mRNA) ENSMUSG00000032238" source="2832" target="527" cy:directed="1"/>
      <edge id="39126" label="mmu-miR-29a-3p (miRNA-mRNA) ENSMUSG00000031838" source="2832" target="3015" cy:directed="1"/>
      <edge id="39125" label="mmu-miR-29a-3p (miRNA-mRNA) ENSMUSG00000028312" source="2832" target="435" cy:directed="1"/>
      <edge id="39124" label="mmu-miR-29a-3p (miRNA-mRNA) ENSMUSG00000028634" source="2832" target="446" cy:directed="1"/>
      <edge id="39123" label="mmu-miR-29a-3p (miRNA-mRNA) ENSMUSG00000030528" source="2832" target="1686" cy:directed="1"/>
      <edge id="39122" label="mmu-miR-29a-3p (miRNA-mRNA) ENSMUSG00000028557" source="2832" target="443" cy:directed="1"/>
      <edge id="39121" label="mmu-miR-29a-3p (miRNA-mRNA) ENSMUSG00000027715" source="2832" target="420" cy:directed="1"/>
      <edge id="39120" label="mmu-miR-29a-3p (miRNA-mRNA) ENSMUSG00000030671" source="2832" target="1689" cy:directed="1"/>
      <edge id="39119" label="mmu-miR-29a-3p (miRNA-mRNA) ENSMUSG00000029924" source="2832" target="1671" cy:directed="1"/>
      <edge id="39118" label="mmu-miR-29a-3p (miRNA-mRNA) ENSMUSG00000028211" source="2832" target="432" cy:directed="1"/>
      <edge id="39117" label="mmu-miR-29a-3p (miRNA-mRNA) ENSMUSG00000028403" source="2832" target="2430" cy:directed="1"/>
      <edge id="39116" label="mmu-miR-29a-3p (miRNA-mRNA) ENSMUSG00000020766" source="2832" target="1306" cy:directed="1"/>
      <edge id="39115" label="mmu-miR-29a-3p (miRNA-mRNA) ENSMUSG00000025477" source="2832" target="362" cy:directed="1"/>
      <edge id="39114" label="mmu-miR-29a-3p (miRNA-mRNA) ENSMUSG00000025161" source="2832" target="1466" cy:directed="1"/>
      <edge id="39113" label="mmu-miR-29a-3p (miRNA-mRNA) ENSMUSG00000020897" source="2832" target="248" cy:directed="1"/>
      <edge id="39112" label="mmu-miR-29a-3p (miRNA-mRNA) ENSMUSG00000021733" source="2832" target="1337" cy:directed="1"/>
      <edge id="39111" label="mmu-miR-29a-3p (miRNA-mRNA) ENSMUSG00000024590" source="2832" target="336" cy:directed="1"/>
      <edge id="39110" label="mmu-miR-29a-3p (miRNA-mRNA) ENSMUSG00000001281" source="2832" target="123" cy:directed="1"/>
      <edge id="39109" label="mmu-miR-29a-3p (miRNA-mRNA) ENSMUSG00000004880" source="2832" target="1182" cy:directed="1"/>
      <edge id="39108" label="mmu-miR-29a-3p (miRNA-mRNA) ENSMUSG00000016495" source="2832" target="3019" cy:directed="1"/>
      <edge id="39107" label="mmu-miR-29a-3p (miRNA-mRNA) ENSMUSG00000002265" source="2832" target="994" cy:directed="1"/>
      <edge id="39106" label="mmu-miR-29a-3p (miRNA-mRNA) ENSMUSG00000012443" source="2832" target="1218" cy:directed="1"/>
      <edge id="39105" label="mmu-miR-29a-3p (miRNA-mRNA) ENSMUSG00000001467" source="2832" target="1150" cy:directed="1"/>
      <edge id="39104" label="mmu-miR-29a-3p (miRNA-mRNA) ENSMUSG00000020034" source="2832" target="1275" cy:directed="1"/>
      <edge id="39103" label="mmu-miR-29a-3p (miRNA-mRNA) ENSMUSG00000004270" source="2832" target="139" cy:directed="1"/>
      <edge id="39102" label="mmu-miR-29a-3p (miRNA-mRNA) ENSMUSG00000019982" source="2832" target="1272" cy:directed="1"/>
      <edge id="39101" label="mmu-miR-29a-3p (miRNA-mRNA) ENSMUSG00000020184" source="2832" target="87" cy:directed="1"/>
      <edge id="39100" label="mmu-miR-29a-3p (miRNA-mRNA) ENSMUSG00000002107" source="2832" target="1161" cy:directed="1"/>
      <edge id="39099" label="mmu-miR-29a-3p (miRNA-mRNA) ENSMUSG00000020423" source="2832" target="1290" cy:directed="1"/>
      <edge id="39098" label="mmu-miR-29a-3p (miRNA-mRNA) ENSMUSG00000000056" source="2832" target="114" cy:directed="1"/>
      <edge id="39097" label="mmu-miR-29a-3p (miRNA-mRNA) ENSMUSG00000004328" source="2832" target="140" cy:directed="1"/>
      <edge id="39096" label="mmu-miR-29c-3p (miRNA-mRNA) ENSMUSG00000062175" source="2831" target="2681" cy:directed="1"/>
      <edge id="39095" label="mmu-miR-29c-3p (miRNA-mRNA) ENSMUSG00000045763" source="2831" target="2670" cy:directed="1"/>
      <edge id="39094" label="mmu-miR-29c-3p (miRNA-mRNA) ENSMUSG00000057789" source="2831" target="2623" cy:directed="1"/>
      <edge id="39093" label="mmu-miR-29c-3p (miRNA-mRNA) ENSMUSG00000048279" source="2831" target="2107" cy:directed="1"/>
      <edge id="39092" label="mmu-miR-29c-3p (miRNA-mRNA) ENSMUSG00000043004" source="2831" target="1050" cy:directed="1"/>
      <edge id="39091" label="mmu-miR-29c-3p (miRNA-mRNA) ENSMUSG00000046179" source="2831" target="2887" cy:directed="1"/>
      <edge id="39090" label="mmu-miR-29c-3p (miRNA-mRNA) ENSMUSG00000051335" source="2831" target="2148" cy:directed="1"/>
      <edge id="39089" label="mmu-miR-29c-3p (miRNA-mRNA) ENSMUSG00000058706" source="2831" target="2998" cy:directed="1"/>
      <edge id="39088" label="mmu-miR-29c-3p (miRNA-mRNA) ENSMUSG00000063568" source="2831" target="2273" cy:directed="1"/>
      <edge id="39087" label="mmu-miR-29c-3p (miRNA-mRNA) ENSMUSG00000047604" source="2831" target="2086" cy:directed="1"/>
      <edge id="39086" label="mmu-miR-29c-3p (miRNA-mRNA) ENSMUSG00000045667" source="2831" target="2060" cy:directed="1"/>
      <edge id="39085" label="mmu-miR-29c-3p (miRNA-mRNA) ENSMUSG00000049878" source="2831" target="806" cy:directed="1"/>
      <edge id="39084" label="mmu-miR-29c-3p (miRNA-mRNA) ENSMUSG00000040351" source="2831" target="684" cy:directed="1"/>
      <edge id="39083" label="mmu-miR-29c-3p (miRNA-mRNA) ENSMUSG00000039967" source="2831" target="1957" cy:directed="1"/>
      <edge id="39082" label="mmu-miR-29c-3p (miRNA-mRNA) ENSMUSG00000039384" source="2831" target="1943" cy:directed="1"/>
      <edge id="39081" label="mmu-miR-29c-3p (miRNA-mRNA) ENSMUSG00000039899" source="2831" target="2678" cy:directed="1"/>
      <edge id="39080" label="mmu-miR-29c-3p (miRNA-mRNA) ENSMUSG00000037818" source="2831" target="2906" cy:directed="1"/>
      <edge id="39079" label="mmu-miR-29c-3p (miRNA-mRNA) ENSMUSG00000034663" source="2831" target="1823" cy:directed="1"/>
      <edge id="39078" label="mmu-miR-29c-3p (miRNA-mRNA) ENSMUSG00000034858" source="2831" target="1036" cy:directed="1"/>
      <edge id="39077" label="mmu-miR-29c-3p (miRNA-mRNA) ENSMUSG00000035239" source="2831" target="1835" cy:directed="1"/>
      <edge id="39076" label="mmu-miR-29c-3p (miRNA-mRNA) ENSMUSG00000040747" source="2831" target="1978" cy:directed="1"/>
      <edge id="39075" label="mmu-miR-29c-3p (miRNA-mRNA) ENSMUSG00000032902" source="2831" target="1787" cy:directed="1"/>
      <edge id="39074" label="mmu-miR-29c-3p (miRNA-mRNA) ENSMUSG00000028312" source="2831" target="435" cy:directed="1"/>
      <edge id="39073" label="mmu-miR-29c-3p (miRNA-mRNA) ENSMUSG00000028634" source="2831" target="446" cy:directed="1"/>
      <edge id="39072" label="mmu-miR-29c-3p (miRNA-mRNA) ENSMUSG00000032035" source="2831" target="109" cy:directed="1"/>
      <edge id="39071" label="mmu-miR-29c-3p (miRNA-mRNA) ENSMUSG00000030528" source="2831" target="1686" cy:directed="1"/>
      <edge id="39070" label="mmu-miR-29c-3p (miRNA-mRNA) ENSMUSG00000028557" source="2831" target="443" cy:directed="1"/>
      <edge id="39069" label="mmu-miR-29c-3p (miRNA-mRNA) ENSMUSG00000027715" source="2831" target="420" cy:directed="1"/>
      <edge id="39068" label="mmu-miR-29c-3p (miRNA-mRNA) ENSMUSG00000030671" source="2831" target="1689" cy:directed="1"/>
      <edge id="39067" label="mmu-miR-29c-3p (miRNA-mRNA) ENSMUSG00000029924" source="2831" target="1671" cy:directed="1"/>
      <edge id="39066" label="mmu-miR-29c-3p (miRNA-mRNA) ENSMUSG00000028211" source="2831" target="432" cy:directed="1"/>
      <edge id="39065" label="mmu-miR-29c-3p (miRNA-mRNA) ENSMUSG00000032238" source="2831" target="527" cy:directed="1"/>
      <edge id="39064" label="mmu-miR-29c-3p (miRNA-mRNA) ENSMUSG00000028403" source="2831" target="2430" cy:directed="1"/>
      <edge id="39063" label="mmu-miR-29c-3p (miRNA-mRNA) ENSMUSG00000031838" source="2831" target="3015" cy:directed="1"/>
      <edge id="39062" label="mmu-miR-29c-3p (miRNA-mRNA) ENSMUSG00000025477" source="2831" target="362" cy:directed="1"/>
      <edge id="39061" label="mmu-miR-29c-3p (miRNA-mRNA) ENSMUSG00000025161" source="2831" target="1466" cy:directed="1"/>
      <edge id="39060" label="mmu-miR-29c-3p (miRNA-mRNA) ENSMUSG00000020897" source="2831" target="248" cy:directed="1"/>
      <edge id="39059" label="mmu-miR-29c-3p (miRNA-mRNA) ENSMUSG00000021733" source="2831" target="1337" cy:directed="1"/>
      <edge id="39058" label="mmu-miR-29c-3p (miRNA-mRNA) ENSMUSG00000024590" source="2831" target="336" cy:directed="1"/>
      <edge id="39057" label="mmu-miR-29c-3p (miRNA-mRNA) ENSMUSG00000001281" source="2831" target="123" cy:directed="1"/>
      <edge id="39056" label="mmu-miR-29c-3p (miRNA-mRNA) ENSMUSG00000004880" source="2831" target="1182" cy:directed="1"/>
      <edge id="39055" label="mmu-miR-29c-3p (miRNA-mRNA) ENSMUSG00000020766" source="2831" target="1306" cy:directed="1"/>
      <edge id="39054" label="mmu-miR-29c-3p (miRNA-mRNA) ENSMUSG00000016495" source="2831" target="3019" cy:directed="1"/>
      <edge id="39053" label="mmu-miR-29c-3p (miRNA-mRNA) ENSMUSG00000012443" source="2831" target="1218" cy:directed="1"/>
      <edge id="39052" label="mmu-miR-29c-3p (miRNA-mRNA) ENSMUSG00000001467" source="2831" target="1150" cy:directed="1"/>
      <edge id="39051" label="mmu-miR-29c-3p (miRNA-mRNA) ENSMUSG00000020034" source="2831" target="1275" cy:directed="1"/>
      <edge id="39050" label="mmu-miR-29c-3p (miRNA-mRNA) ENSMUSG00000004270" source="2831" target="139" cy:directed="1"/>
      <edge id="39049" label="mmu-miR-29c-3p (miRNA-mRNA) ENSMUSG00000019982" source="2831" target="1272" cy:directed="1"/>
      <edge id="39048" label="mmu-miR-29c-3p (miRNA-mRNA) ENSMUSG00000020184" source="2831" target="87" cy:directed="1"/>
      <edge id="39047" label="mmu-miR-29c-3p (miRNA-mRNA) ENSMUSG00000002107" source="2831" target="1161" cy:directed="1"/>
      <edge id="39046" label="mmu-miR-29c-3p (miRNA-mRNA) ENSMUSG00000020423" source="2831" target="1290" cy:directed="1"/>
      <edge id="39045" label="mmu-miR-29c-3p (miRNA-mRNA) ENSMUSG00000000056" source="2831" target="114" cy:directed="1"/>
      <edge id="39044" label="mmu-miR-29c-3p (miRNA-mRNA) ENSMUSG00000004328" source="2831" target="140" cy:directed="1"/>
      <edge id="39043" label="mmu-miR-101a-3p (miRNA-mRNA) ENSMUSG00000091387" source="2830" target="971" cy:directed="1"/>
      <edge id="39042" label="mmu-miR-101a-3p (miRNA-mRNA) ENSMUSG00000074364" source="2830" target="2347" cy:directed="1"/>
      <edge id="39041" label="mmu-miR-101a-3p (miRNA-mRNA) ENSMUSG00000078570" source="2830" target="3132" cy:directed="1"/>
      <edge id="39040" label="mmu-miR-101a-3p (miRNA-mRNA) ENSMUSG00000073988" source="2830" target="949" cy:directed="1"/>
      <edge id="39039" label="mmu-miR-101a-3p (miRNA-mRNA) ENSMUSG00000089774" source="2830" target="2967" cy:directed="1"/>
      <edge id="39038" label="mmu-miR-101a-3p (miRNA-mRNA) ENSMUSG00000090622" source="2830" target="3083" cy:directed="1"/>
      <edge id="39037" label="mmu-miR-101a-3p (miRNA-mRNA) ENSMUSG00000069114" source="2830" target="926" cy:directed="1"/>
      <edge id="39036" label="mmu-miR-101a-3p (miRNA-mRNA) ENSMUSG00000064210" source="2830" target="2891" cy:directed="1"/>
      <edge id="39035" label="mmu-miR-101a-3p (miRNA-mRNA) ENSMUSG00000064373" source="2830" target="2285" cy:directed="1"/>
      <edge id="39034" label="mmu-miR-101a-3p (miRNA-mRNA) ENSMUSG00000064225" source="2830" target="2282" cy:directed="1"/>
      <edge id="39033" label="mmu-miR-101a-3p (miRNA-mRNA) ENSMUSG00000061578" source="2830" target="895" cy:directed="1"/>
      <edge id="39032" label="mmu-miR-101a-3p (miRNA-mRNA) ENSMUSG00000067377" source="2830" target="2297" cy:directed="1"/>
      <edge id="39031" label="mmu-miR-101a-3p (miRNA-mRNA) ENSMUSG00000064367" source="2830" target="3122" cy:directed="1"/>
      <edge id="39030" label="mmu-miR-101a-3p (miRNA-mRNA) ENSMUSG00000064370" source="2830" target="3121" cy:directed="1"/>
      <edge id="39029" label="mmu-miR-101a-3p (miRNA-mRNA) ENSMUSG00000068587" source="2830" target="2306" cy:directed="1"/>
      <edge id="39028" label="mmu-miR-101a-3p (miRNA-mRNA) ENSMUSG00000066357" source="2830" target="2602" cy:directed="1"/>
      <edge id="39027" label="mmu-miR-101a-3p (miRNA-mRNA) ENSMUSG00000068196" source="2830" target="920" cy:directed="1"/>
      <edge id="39026" label="mmu-miR-101a-3p (miRNA-mRNA) ENSMUSG00000060301" source="2830" target="888" cy:directed="1"/>
      <edge id="39025" label="mmu-miR-101a-3p (miRNA-mRNA) ENSMUSG00000062078" source="2830" target="898" cy:directed="1"/>
      <edge id="39024" label="mmu-miR-101a-3p (miRNA-mRNA) ENSMUSG00000059742" source="2830" target="1062" cy:directed="1"/>
      <edge id="39023" label="mmu-miR-101a-3p (miRNA-mRNA) ENSMUSG00000055538" source="2830" target="2200" cy:directed="1"/>
      <edge id="39022" label="mmu-miR-101a-3p (miRNA-mRNA) ENSMUSG00000053279" source="2830" target="2172" cy:directed="1"/>
      <edge id="39021" label="mmu-miR-101a-3p (miRNA-mRNA) ENSMUSG00000057880" source="2830" target="2229" cy:directed="1"/>
      <edge id="39020" label="mmu-miR-101a-3p (miRNA-mRNA) ENSMUSG00000057315" source="2830" target="3107" cy:directed="1"/>
      <edge id="39019" label="mmu-miR-101a-3p (miRNA-mRNA) ENSMUSG00000055675" source="2830" target="2203" cy:directed="1"/>
      <edge id="39018" label="mmu-miR-101a-3p (miRNA-mRNA) ENSMUSG00000054733" source="2830" target="2189" cy:directed="1"/>
      <edge id="39017" label="mmu-miR-101a-3p (miRNA-mRNA) ENSMUSG00000052727" source="2830" target="2929" cy:directed="1"/>
      <edge id="39016" label="mmu-miR-101a-3p (miRNA-mRNA) ENSMUSG00000055567" source="2830" target="2201" cy:directed="1"/>
      <edge id="39015" label="mmu-miR-101a-3p (miRNA-mRNA) ENSMUSG00000053965" source="2830" target="2177" cy:directed="1"/>
      <edge id="39014" label="mmu-miR-101a-3p (miRNA-mRNA) ENSMUSG00000056602" source="2830" target="1106" cy:directed="1"/>
      <edge id="39013" label="mmu-miR-101a-3p (miRNA-mRNA) ENSMUSG00000058070" source="2830" target="872" cy:directed="1"/>
      <edge id="39012" label="mmu-miR-101a-3p (miRNA-mRNA) ENSMUSG00000055912" source="2830" target="2205" cy:directed="1"/>
      <edge id="39011" label="mmu-miR-101a-3p (miRNA-mRNA) ENSMUSG00000053617" source="2830" target="2175" cy:directed="1"/>
      <edge id="39010" label="mmu-miR-101a-3p (miRNA-mRNA) ENSMUSG00000053470" source="2830" target="836" cy:directed="1"/>
      <edge id="39009" label="mmu-miR-101a-3p (miRNA-mRNA) ENSMUSG00000058756" source="2830" target="80" cy:directed="1"/>
      <edge id="39008" label="mmu-miR-101a-3p (miRNA-mRNA) ENSMUSG00000058975" source="2830" target="877" cy:directed="1"/>
      <edge id="39007" label="mmu-miR-101a-3p (miRNA-mRNA) ENSMUSG00000057706" source="2830" target="2227" cy:directed="1"/>
      <edge id="39006" label="mmu-miR-101a-3p (miRNA-mRNA) ENSMUSG00000053580" source="2830" target="837" cy:directed="1"/>
      <edge id="39005" label="mmu-miR-101a-3p (miRNA-mRNA) ENSMUSG00000048911" source="2830" target="2117" cy:directed="1"/>
      <edge id="39004" label="mmu-miR-101a-3p (miRNA-mRNA) ENSMUSG00000051335" source="2830" target="2148" cy:directed="1"/>
      <edge id="39003" label="mmu-miR-101a-3p (miRNA-mRNA) ENSMUSG00000048022" source="2830" target="2101" cy:directed="1"/>
      <edge id="39002" label="mmu-miR-101a-3p (miRNA-mRNA) ENSMUSG00000052229" source="2830" target="3131" cy:directed="1"/>
      <edge id="39001" label="mmu-miR-101a-3p (miRNA-mRNA) ENSMUSG00000050379" source="2830" target="2136" cy:directed="1"/>
      <edge id="39000" label="mmu-miR-101a-3p (miRNA-mRNA) ENSMUSG00000051331" source="2830" target="2682" cy:directed="1"/>
      <edge id="38999" label="mmu-miR-101a-3p (miRNA-mRNA) ENSMUSG00000051323" source="2830" target="2889" cy:directed="1"/>
      <edge id="38998" label="mmu-miR-101a-3p (miRNA-mRNA) ENSMUSG00000048078" source="2830" target="2103" cy:directed="1"/>
      <edge id="38997" label="mmu-miR-101a-3p (miRNA-mRNA) ENSMUSG00000048376" source="2830" target="787" cy:directed="1"/>
      <edge id="38996" label="mmu-miR-101a-3p (miRNA-mRNA) ENSMUSG00000049878" source="2830" target="806" cy:directed="1"/>
      <edge id="38995" label="mmu-miR-101a-3p (miRNA-mRNA) ENSMUSG00000048279" source="2830" target="2107" cy:directed="1"/>
      <edge id="38994" label="mmu-miR-101a-3p (miRNA-mRNA) ENSMUSG00000049858" source="2830" target="2127" cy:directed="1"/>
      <edge id="38993" label="mmu-miR-101a-3p (miRNA-mRNA) ENSMUSG00000049313" source="2830" target="1101" cy:directed="1"/>
      <edge id="38992" label="mmu-miR-101a-3p (miRNA-mRNA) ENSMUSG00000052105" source="2830" target="824" cy:directed="1"/>
      <edge id="38991" label="mmu-miR-101a-3p (miRNA-mRNA) ENSMUSG00000050192" source="2830" target="2517" cy:directed="1"/>
      <edge id="38990" label="mmu-miR-101a-3p (miRNA-mRNA) ENSMUSG00000047945" source="2830" target="782" cy:directed="1"/>
      <edge id="38989" label="mmu-miR-101a-3p (miRNA-mRNA) ENSMUSG00000048895" source="2830" target="1100" cy:directed="1"/>
      <edge id="38988" label="mmu-miR-101a-3p (miRNA-mRNA) ENSMUSG00000050592" source="2830" target="1102" cy:directed="1"/>
      <edge id="38987" label="mmu-miR-101a-3p (miRNA-mRNA) ENSMUSG00000047976" source="2830" target="783" cy:directed="1"/>
      <edge id="38986" label="mmu-miR-101a-3p (miRNA-mRNA) ENSMUSG00000049670" source="2830" target="2125" cy:directed="1"/>
      <edge id="38985" label="mmu-miR-101a-3p (miRNA-mRNA) ENSMUSG00000049184" source="2830" target="796" cy:directed="1"/>
      <edge id="38984" label="mmu-miR-101a-3p (miRNA-mRNA) ENSMUSG00000048216" source="2830" target="2105" cy:directed="1"/>
      <edge id="38983" label="mmu-miR-101a-3p (miRNA-mRNA) ENSMUSG00000050953" source="2830" target="816" cy:directed="1"/>
      <edge id="38982" label="mmu-miR-101a-3p (miRNA-mRNA) ENSMUSG00000044707" source="2830" target="2048" cy:directed="1"/>
      <edge id="38981" label="mmu-miR-101a-3p (miRNA-mRNA) ENSMUSG00000047238" source="2830" target="3130" cy:directed="1"/>
      <edge id="38980" label="mmu-miR-101a-3p (miRNA-mRNA) ENSMUSG00000046432" source="2830" target="2514" cy:directed="1"/>
      <edge id="38979" label="mmu-miR-101a-3p (miRNA-mRNA) ENSMUSG00000044927" source="2830" target="3129" cy:directed="1"/>
      <edge id="38978" label="mmu-miR-101a-3p (miRNA-mRNA) ENSMUSG00000044340" source="2830" target="2044" cy:directed="1"/>
      <edge id="38977" label="mmu-miR-101a-3p (miRNA-mRNA) ENSMUSG00000044060" source="2830" target="2908" cy:directed="1"/>
      <edge id="38976" label="mmu-miR-101a-3p (miRNA-mRNA) ENSMUSG00000047747" source="2830" target="779" cy:directed="1"/>
      <edge id="38975" label="mmu-miR-101a-3p (miRNA-mRNA) ENSMUSG00000046442" source="2830" target="2069" cy:directed="1"/>
      <edge id="38974" label="mmu-miR-101a-3p (miRNA-mRNA) ENSMUSG00000046387" source="2830" target="2926" cy:directed="1"/>
      <edge id="38973" label="mmu-miR-101a-3p (miRNA-mRNA) ENSMUSG00000045827" source="2830" target="2462" cy:directed="1"/>
      <edge id="38972" label="mmu-miR-101a-3p (miRNA-mRNA) ENSMUSG00000043496" source="2830" target="2884" cy:directed="1"/>
      <edge id="38971" label="mmu-miR-101a-3p (miRNA-mRNA) ENSMUSG00000044026" source="2830" target="2037" cy:directed="1"/>
      <edge id="38970" label="mmu-miR-101a-3p (miRNA-mRNA) ENSMUSG00000046447" source="2830" target="2070" cy:directed="1"/>
      <edge id="38969" label="mmu-miR-101a-3p (miRNA-mRNA) ENSMUSG00000044548" source="2830" target="746" cy:directed="1"/>
      <edge id="38968" label="mmu-miR-101a-3p (miRNA-mRNA) ENSMUSG00000044288" source="2830" target="2041" cy:directed="1"/>
      <edge id="38967" label="mmu-miR-101a-3p (miRNA-mRNA) ENSMUSG00000043885" source="2830" target="2034" cy:directed="1"/>
      <edge id="38966" label="mmu-miR-101a-3p (miRNA-mRNA) ENSMUSG00000046668" source="2830" target="770" cy:directed="1"/>
      <edge id="38965" label="mmu-miR-101a-3p (miRNA-mRNA) ENSMUSG00000046179" source="2830" target="2887" cy:directed="1"/>
      <edge id="38964" label="mmu-miR-101a-3p (miRNA-mRNA) ENSMUSG00000046743" source="2830" target="2990" cy:directed="1"/>
      <edge id="38963" label="mmu-miR-101a-3p (miRNA-mRNA) ENSMUSG00000044646" source="2830" target="747" cy:directed="1"/>
      <edge id="38962" label="mmu-miR-101a-3p (miRNA-mRNA) ENSMUSG00000044365" source="2830" target="3128" cy:directed="1"/>
      <edge id="38961" label="mmu-miR-101a-3p (miRNA-mRNA) ENSMUSG00000042042" source="2830" target="717" cy:directed="1"/>
      <edge id="38960" label="mmu-miR-101a-3p (miRNA-mRNA) ENSMUSG00000042155" source="2830" target="2004" cy:directed="1"/>
      <edge id="38959" label="mmu-miR-101a-3p (miRNA-mRNA) ENSMUSG00000040249" source="2830" target="105" cy:directed="1"/>
      <edge id="38958" label="mmu-miR-101a-3p (miRNA-mRNA) ENSMUSG00000041741" source="2830" target="2881" cy:directed="1"/>
      <edge id="38957" label="mmu-miR-101a-3p (miRNA-mRNA) ENSMUSG00000041040" source="2830" target="697" cy:directed="1"/>
      <edge id="38956" label="mmu-miR-101a-3p (miRNA-mRNA) ENSMUSG00000041642" source="2830" target="2883" cy:directed="1"/>
      <edge id="38955" label="mmu-miR-101a-3p (miRNA-mRNA) ENSMUSG00000040631" source="2830" target="691" cy:directed="1"/>
      <edge id="38954" label="mmu-miR-101a-3p (miRNA-mRNA) ENSMUSG00000041570" source="2830" target="710" cy:directed="1"/>
      <edge id="38953" label="mmu-miR-101a-3p (miRNA-mRNA) ENSMUSG00000041444" source="2830" target="1990" cy:directed="1"/>
      <edge id="38952" label="mmu-miR-101a-3p (miRNA-mRNA) ENSMUSG00000042686" source="2830" target="2016" cy:directed="1"/>
      <edge id="38951" label="mmu-miR-101a-3p (miRNA-mRNA) ENSMUSG00000040433" source="2830" target="687" cy:directed="1"/>
      <edge id="38950" label="mmu-miR-101a-3p (miRNA-mRNA) ENSMUSG00000040918" source="2830" target="694" cy:directed="1"/>
      <edge id="38949" label="mmu-miR-101a-3p (miRNA-mRNA) ENSMUSG00000041025" source="2830" target="696" cy:directed="1"/>
      <edge id="38948" label="mmu-miR-101a-3p (miRNA-mRNA) ENSMUSG00000040998" source="2830" target="1982" cy:directed="1"/>
      <edge id="38947" label="mmu-miR-101a-3p (miRNA-mRNA) ENSMUSG00000039178" source="2830" target="1936" cy:directed="1"/>
      <edge id="38946" label="mmu-miR-101a-3p (miRNA-mRNA) ENSMUSG00000039967" source="2830" target="1957" cy:directed="1"/>
      <edge id="38945" label="mmu-miR-101a-3p (miRNA-mRNA) ENSMUSG00000040118" source="2830" target="1960" cy:directed="1"/>
      <edge id="38944" label="mmu-miR-101a-3p (miRNA-mRNA) ENSMUSG00000038555" source="2830" target="1914" cy:directed="1"/>
      <edge id="38943" label="mmu-miR-101a-3p (miRNA-mRNA) ENSMUSG00000039601" source="2830" target="1946" cy:directed="1"/>
      <edge id="38942" label="mmu-miR-101a-3p (miRNA-mRNA) ENSMUSG00000039497" source="2830" target="1944" cy:directed="1"/>
      <edge id="38941" label="mmu-miR-101a-3p (miRNA-mRNA) ENSMUSG00000039952" source="2830" target="1956" cy:directed="1"/>
      <edge id="38940" label="mmu-miR-101a-3p (miRNA-mRNA) ENSMUSG00000039087" source="2830" target="665" cy:directed="1"/>
      <edge id="38939" label="mmu-miR-101a-3p (miRNA-mRNA) ENSMUSG00000040170" source="2830" target="680" cy:directed="1"/>
      <edge id="38938" label="mmu-miR-101a-3p (miRNA-mRNA) ENSMUSG00000039607" source="2830" target="1947" cy:directed="1"/>
      <edge id="38937" label="mmu-miR-101a-3p (miRNA-mRNA) ENSMUSG00000038768" source="2830" target="1925" cy:directed="1"/>
      <edge id="38936" label="mmu-miR-101a-3p (miRNA-mRNA) ENSMUSG00000039126" source="2830" target="666" cy:directed="1"/>
      <edge id="38935" label="mmu-miR-101a-3p (miRNA-mRNA) ENSMUSG00000039899" source="2830" target="2678" cy:directed="1"/>
      <edge id="38934" label="mmu-miR-101a-3p (miRNA-mRNA) ENSMUSG00000040209" source="2830" target="681" cy:directed="1"/>
      <edge id="38933" label="mmu-miR-101a-3p (miRNA-mRNA) ENSMUSG00000039428" source="2830" target="2669" cy:directed="1"/>
      <edge id="38932" label="mmu-miR-101a-3p (miRNA-mRNA) ENSMUSG00000040136" source="2830" target="1096" cy:directed="1"/>
      <edge id="38931" label="mmu-miR-101a-3p (miRNA-mRNA) ENSMUSG00000039485" source="2830" target="3127" cy:directed="1"/>
      <edge id="38930" label="mmu-miR-101a-3p (miRNA-mRNA) ENSMUSG00000039270" source="2830" target="669" cy:directed="1"/>
      <edge id="38929" label="mmu-miR-101a-3p (miRNA-mRNA) ENSMUSG00000037736" source="2830" target="1894" cy:directed="1"/>
      <edge id="38928" label="mmu-miR-101a-3p (miRNA-mRNA) ENSMUSG00000037712" source="2830" target="636" cy:directed="1"/>
      <edge id="38927" label="mmu-miR-101a-3p (miRNA-mRNA) ENSMUSG00000036880" source="2830" target="1877" cy:directed="1"/>
      <edge id="38926" label="mmu-miR-101a-3p (miRNA-mRNA) ENSMUSG00000036902" source="2830" target="2987" cy:directed="1"/>
      <edge id="38925" label="mmu-miR-101a-3p (miRNA-mRNA) ENSMUSG00000037852" source="2830" target="639" cy:directed="1"/>
      <edge id="38924" label="mmu-miR-101a-3p (miRNA-mRNA) ENSMUSG00000037905" source="2830" target="1896" cy:directed="1"/>
      <edge id="38923" label="mmu-miR-101a-3p (miRNA-mRNA) ENSMUSG00000036564" source="2830" target="1872" cy:directed="1"/>
      <edge id="38922" label="mmu-miR-101a-3p (miRNA-mRNA) ENSMUSG00000036473" source="2830" target="2873" cy:directed="1"/>
      <edge id="38921" label="mmu-miR-101a-3p (miRNA-mRNA) ENSMUSG00000037818" source="2830" target="2906" cy:directed="1"/>
      <edge id="38920" label="mmu-miR-101a-3p (miRNA-mRNA) ENSMUSG00000036745" source="2830" target="607" cy:directed="1"/>
      <edge id="38919" label="mmu-miR-101a-3p (miRNA-mRNA) ENSMUSG00000037071" source="2830" target="616" cy:directed="1"/>
      <edge id="38918" label="mmu-miR-101a-3p (miRNA-mRNA) ENSMUSG00000037679" source="2830" target="634" cy:directed="1"/>
      <edge id="38917" label="mmu-miR-101a-3p (miRNA-mRNA) ENSMUSG00000038248" source="2830" target="2924" cy:directed="1"/>
      <edge id="38916" label="mmu-miR-101a-3p (miRNA-mRNA) ENSMUSG00000038412" source="2830" target="2876" cy:directed="1"/>
      <edge id="38915" label="mmu-miR-101a-3p (miRNA-mRNA) ENSMUSG00000038121" source="2830" target="2875" cy:directed="1"/>
      <edge id="38914" label="mmu-miR-101a-3p (miRNA-mRNA) ENSMUSG00000036533" source="2830" target="3126" cy:directed="1"/>
      <edge id="38913" label="mmu-miR-101a-3p (miRNA-mRNA) ENSMUSG00000037972" source="2830" target="642" cy:directed="1"/>
      <edge id="38912" label="mmu-miR-101a-3p (miRNA-mRNA) ENSMUSG00000034118" source="2830" target="1813" cy:directed="1"/>
      <edge id="38911" label="mmu-miR-101a-3p (miRNA-mRNA) ENSMUSG00000035105" source="2830" target="586" cy:directed="1"/>
      <edge id="38910" label="mmu-miR-101a-3p (miRNA-mRNA) ENSMUSG00000033871" source="2830" target="568" cy:directed="1"/>
      <edge id="38909" label="mmu-miR-101a-3p (miRNA-mRNA) ENSMUSG00000034875" source="2830" target="3110" cy:directed="1"/>
      <edge id="38908" label="mmu-miR-101a-3p (miRNA-mRNA) ENSMUSG00000035901" source="2830" target="602" cy:directed="1"/>
      <edge id="38907" label="mmu-miR-101a-3p (miRNA-mRNA) ENSMUSG00000036036" source="2830" target="603" cy:directed="1"/>
      <edge id="38906" label="mmu-miR-101a-3p (miRNA-mRNA) ENSMUSG00000035954" source="2830" target="2847" cy:directed="1"/>
      <edge id="38905" label="mmu-miR-101a-3p (miRNA-mRNA) ENSMUSG00000034413" source="2830" target="576" cy:directed="1"/>
      <edge id="38904" label="mmu-miR-101a-3p (miRNA-mRNA) ENSMUSG00000034111" source="2830" target="2871" cy:directed="1"/>
      <edge id="38903" label="mmu-miR-101a-3p (miRNA-mRNA) ENSMUSG00000035847" source="2830" target="1849" cy:directed="1"/>
      <edge id="38902" label="mmu-miR-101a-3p (miRNA-mRNA) ENSMUSG00000034593" source="2830" target="1091" cy:directed="1"/>
      <edge id="38901" label="mmu-miR-101a-3p (miRNA-mRNA) ENSMUSG00000034724" source="2830" target="1826" cy:directed="1"/>
      <edge id="38900" label="mmu-miR-101a-3p (miRNA-mRNA) ENSMUSG00000034573" source="2830" target="579" cy:directed="1"/>
      <edge id="38899" label="mmu-miR-101a-3p (miRNA-mRNA) ENSMUSG00000034957" source="2830" target="102" cy:directed="1"/>
      <edge id="38898" label="mmu-miR-101a-3p (miRNA-mRNA) ENSMUSG00000034858" source="2830" target="1036" cy:directed="1"/>
      <edge id="38897" label="mmu-miR-101a-3p (miRNA-mRNA) ENSMUSG00000035164" source="2830" target="588" cy:directed="1"/>
      <edge id="38896" label="mmu-miR-101a-3p (miRNA-mRNA) ENSMUSG00000035158" source="2830" target="99" cy:directed="1"/>
      <edge id="38895" label="mmu-miR-101a-3p (miRNA-mRNA) ENSMUSG00000034663" source="2830" target="1823" cy:directed="1"/>
      <edge id="38894" label="mmu-miR-101a-3p (miRNA-mRNA) ENSMUSG00000034648" source="2830" target="1821" cy:directed="1"/>
      <edge id="38893" label="mmu-miR-101a-3p (miRNA-mRNA) ENSMUSG00000035107" source="2830" target="587" cy:directed="1"/>
      <edge id="38892" label="mmu-miR-101a-3p (miRNA-mRNA) ENSMUSG00000031902" source="2830" target="1740" cy:directed="1"/>
      <edge id="38891" label="mmu-miR-101a-3p (miRNA-mRNA) ENSMUSG00000031748" source="2830" target="2955" cy:directed="1"/>
      <edge id="38890" label="mmu-miR-101a-3p (miRNA-mRNA) ENSMUSG00000032902" source="2830" target="1787" cy:directed="1"/>
      <edge id="38889" label="mmu-miR-101a-3p (miRNA-mRNA) ENSMUSG00000032035" source="2830" target="109" cy:directed="1"/>
      <edge id="38888" label="mmu-miR-101a-3p (miRNA-mRNA) ENSMUSG00000033530" source="2830" target="563" cy:directed="1"/>
      <edge id="38887" label="mmu-miR-101a-3p (miRNA-mRNA) ENSMUSG00000032717" source="2830" target="1780" cy:directed="1"/>
      <edge id="38886" label="mmu-miR-101a-3p (miRNA-mRNA) ENSMUSG00000031790" source="2830" target="517" cy:directed="1"/>
      <edge id="38885" label="mmu-miR-101a-3p (miRNA-mRNA) ENSMUSG00000033740" source="2830" target="567" cy:directed="1"/>
      <edge id="38884" label="mmu-miR-101a-3p (miRNA-mRNA) ENSMUSG00000032092" source="2830" target="1753" cy:directed="1"/>
      <edge id="38883" label="mmu-miR-101a-3p (miRNA-mRNA) ENSMUSG00000032487" source="2830" target="110" cy:directed="1"/>
      <edge id="38882" label="mmu-miR-101a-3p (miRNA-mRNA) ENSMUSG00000030772" source="2830" target="492" cy:directed="1"/>
      <edge id="38881" label="mmu-miR-101a-3p (miRNA-mRNA) ENSMUSG00000031647" source="2830" target="513" cy:directed="1"/>
      <edge id="38880" label="mmu-miR-101a-3p (miRNA-mRNA) ENSMUSG00000031532" source="2830" target="1720" cy:directed="1"/>
      <edge id="38879" label="mmu-miR-101a-3p (miRNA-mRNA) ENSMUSG00000030884" source="2830" target="2543" cy:directed="1"/>
      <edge id="38878" label="mmu-miR-101a-3p (miRNA-mRNA) ENSMUSG00000031367" source="2830" target="1710" cy:directed="1"/>
      <edge id="38877" label="mmu-miR-101a-3p (miRNA-mRNA) ENSMUSG00000030643" source="2830" target="488" cy:directed="1"/>
      <edge id="38876" label="mmu-miR-101a-3p (miRNA-mRNA) ENSMUSG00000031502" source="2830" target="2952" cy:directed="1"/>
      <edge id="38875" label="mmu-miR-101a-3p (miRNA-mRNA) ENSMUSG00000031442" source="2830" target="2868" cy:directed="1"/>
      <edge id="38874" label="mmu-miR-101a-3p (miRNA-mRNA) ENSMUSG00000031561" source="2830" target="2921" cy:directed="1"/>
      <edge id="38873" label="mmu-miR-101a-3p (miRNA-mRNA) ENSMUSG00000031644" source="2830" target="1725" cy:directed="1"/>
      <edge id="38872" label="mmu-miR-101a-3p (miRNA-mRNA) ENSMUSG00000031004" source="2830" target="494" cy:directed="1"/>
      <edge id="38871" label="mmu-miR-101a-3p (miRNA-mRNA) ENSMUSG00000030401" source="2830" target="1683" cy:directed="1"/>
      <edge id="38870" label="mmu-miR-101a-3p (miRNA-mRNA) ENSMUSG00000030671" source="2830" target="1689" cy:directed="1"/>
      <edge id="38869" label="mmu-miR-101a-3p (miRNA-mRNA) ENSMUSG00000031538" source="2830" target="507" cy:directed="1"/>
      <edge id="38868" label="mmu-miR-101a-3p (miRNA-mRNA) ENSMUSG00000031353" source="2830" target="501" cy:directed="1"/>
      <edge id="38867" label="mmu-miR-101a-3p (miRNA-mRNA) ENSMUSG00000031202" source="2830" target="3125" cy:directed="1"/>
      <edge id="38866" label="mmu-miR-101a-3p (miRNA-mRNA) ENSMUSG00000029419" source="2830" target="1648" cy:directed="1"/>
      <edge id="38865" label="mmu-miR-101a-3p (miRNA-mRNA) ENSMUSG00000029669" source="2830" target="2980" cy:directed="1"/>
      <edge id="38864" label="mmu-miR-101a-3p (miRNA-mRNA) ENSMUSG00000029716" source="2830" target="2591" cy:directed="1"/>
      <edge id="38863" label="mmu-miR-101a-3p (miRNA-mRNA) ENSMUSG00000029033" source="2830" target="2979" cy:directed="1"/>
      <edge id="38862" label="mmu-miR-101a-3p (miRNA-mRNA) ENSMUSG00000029156" source="2830" target="1632" cy:directed="1"/>
      <edge id="38861" label="mmu-miR-101a-3p (miRNA-mRNA) ENSMUSG00000030102" source="2830" target="1674" cy:directed="1"/>
      <edge id="38860" label="mmu-miR-101a-3p (miRNA-mRNA) ENSMUSG00000029761" source="2830" target="1662" cy:directed="1"/>
      <edge id="38859" label="mmu-miR-101a-3p (miRNA-mRNA) ENSMUSG00000029192" source="2830" target="2919" cy:directed="1"/>
      <edge id="38858" label="mmu-miR-101a-3p (miRNA-mRNA) ENSMUSG00000030087" source="2830" target="480" cy:directed="1"/>
      <edge id="38857" label="mmu-miR-101a-3p (miRNA-mRNA) ENSMUSG00000029334" source="2830" target="2431" cy:directed="1"/>
      <edge id="38856" label="mmu-miR-101a-3p (miRNA-mRNA) ENSMUSG00000030207" source="2830" target="2867" cy:directed="1"/>
      <edge id="38855" label="mmu-miR-101a-3p (miRNA-mRNA) ENSMUSG00000029484" source="2830" target="466" cy:directed="1"/>
      <edge id="38854" label="mmu-miR-101a-3p (miRNA-mRNA) ENSMUSG00000029330" source="2830" target="465" cy:directed="1"/>
      <edge id="38853" label="mmu-miR-101a-3p (miRNA-mRNA) ENSMUSG00000029094" source="2830" target="458" cy:directed="1"/>
      <edge id="38852" label="mmu-miR-101a-3p (miRNA-mRNA) ENSMUSG00000029287" source="2830" target="1119" cy:directed="1"/>
      <edge id="38851" label="mmu-miR-101a-3p (miRNA-mRNA) ENSMUSG00000028312" source="2830" target="435" cy:directed="1"/>
      <edge id="38850" label="mmu-miR-101a-3p (miRNA-mRNA) ENSMUSG00000027435" source="2830" target="1567" cy:directed="1"/>
      <edge id="38849" label="mmu-miR-101a-3p (miRNA-mRNA) ENSMUSG00000027406" source="2830" target="1566" cy:directed="1"/>
      <edge id="38848" label="mmu-miR-101a-3p (miRNA-mRNA) ENSMUSG00000028289" source="2830" target="434" cy:directed="1"/>
      <edge id="38847" label="mmu-miR-101a-3p (miRNA-mRNA) ENSMUSG00000027438" source="2830" target="1568" cy:directed="1"/>
      <edge id="38846" label="mmu-miR-101a-3p (miRNA-mRNA) ENSMUSG00000027695" source="2830" target="93" cy:directed="1"/>
      <edge id="38845" label="mmu-miR-101a-3p (miRNA-mRNA) ENSMUSG00000027954" source="2830" target="429" cy:directed="1"/>
      <edge id="38844" label="mmu-miR-101a-3p (miRNA-mRNA) ENSMUSG00000028158" source="2830" target="1601" cy:directed="1"/>
      <edge id="38843" label="mmu-miR-101a-3p (miRNA-mRNA) ENSMUSG00000028655" source="2830" target="2947" cy:directed="1"/>
      <edge id="38842" label="mmu-miR-101a-3p (miRNA-mRNA) ENSMUSG00000028557" source="2830" target="443" cy:directed="1"/>
      <edge id="38841" label="mmu-miR-101a-3p (miRNA-mRNA) ENSMUSG00000027834" source="2830" target="423" cy:directed="1"/>
      <edge id="38840" label="mmu-miR-101a-3p (miRNA-mRNA) ENSMUSG00000028211" source="2830" target="432" cy:directed="1"/>
      <edge id="38839" label="mmu-miR-101a-3p (miRNA-mRNA) ENSMUSG00000027737" source="2830" target="1578" cy:directed="1"/>
      <edge id="38838" label="mmu-miR-101a-3p (miRNA-mRNA) ENSMUSG00000028463" source="2830" target="3120" cy:directed="1"/>
      <edge id="38837" label="mmu-miR-101a-3p (miRNA-mRNA) ENSMUSG00000028849" source="2830" target="454" cy:directed="1"/>
      <edge id="38836" label="mmu-miR-101a-3p (miRNA-mRNA) ENSMUSG00000028634" source="2830" target="446" cy:directed="1"/>
      <edge id="38835" label="mmu-miR-101a-3p (miRNA-mRNA) ENSMUSG00000028403" source="2830" target="2430" cy:directed="1"/>
      <edge id="38834" label="mmu-miR-101a-3p (miRNA-mRNA) ENSMUSG00000027346" source="2830" target="1561" cy:directed="1"/>
      <edge id="38833" label="mmu-miR-101a-3p (miRNA-mRNA) ENSMUSG00000026848" source="2830" target="397" cy:directed="1"/>
      <edge id="38832" label="mmu-miR-101a-3p (miRNA-mRNA) ENSMUSG00000026417" source="2830" target="1524" cy:directed="1"/>
      <edge id="38831" label="mmu-miR-101a-3p (miRNA-mRNA) ENSMUSG00000027254" source="2830" target="1024" cy:directed="1"/>
      <edge id="38830" label="mmu-miR-101a-3p (miRNA-mRNA) ENSMUSG00000026833" source="2830" target="1543" cy:directed="1"/>
      <edge id="38829" label="mmu-miR-101a-3p (miRNA-mRNA) ENSMUSG00000026586" source="2830" target="1532" cy:directed="1"/>
      <edge id="38828" label="mmu-miR-101a-3p (miRNA-mRNA) ENSMUSG00000027074" source="2830" target="1550" cy:directed="1"/>
      <edge id="38827" label="mmu-miR-101a-3p (miRNA-mRNA) ENSMUSG00000026430" source="2830" target="384" cy:directed="1"/>
      <edge id="38826" label="mmu-miR-101a-3p (miRNA-mRNA) ENSMUSG00000026604" source="2830" target="392" cy:directed="1"/>
      <edge id="38825" label="mmu-miR-101a-3p (miRNA-mRNA) ENSMUSG00000026888" source="2830" target="1544" cy:directed="1"/>
      <edge id="38824" label="mmu-miR-101a-3p (miRNA-mRNA) ENSMUSG00000026489" source="2830" target="1529" cy:directed="1"/>
      <edge id="38823" label="mmu-miR-101a-3p (miRNA-mRNA) ENSMUSG00000026380" source="2830" target="1519" cy:directed="1"/>
      <edge id="38822" label="mmu-miR-101a-3p (miRNA-mRNA) ENSMUSG00000027220" source="2830" target="1556" cy:directed="1"/>
      <edge id="38821" label="mmu-miR-101a-3p (miRNA-mRNA) ENSMUSG00000027006" source="2830" target="404" cy:directed="1"/>
      <edge id="38820" label="mmu-miR-101a-3p (miRNA-mRNA) ENSMUSG00000026880" source="2830" target="399" cy:directed="1"/>
      <edge id="38819" label="mmu-miR-101a-3p (miRNA-mRNA) ENSMUSG00000026737" source="2830" target="2575" cy:directed="1"/>
      <edge id="38818" label="mmu-miR-101a-3p (miRNA-mRNA) ENSMUSG00000027175" source="2830" target="1553" cy:directed="1"/>
      <edge id="38817" label="mmu-miR-101a-3p (miRNA-mRNA) ENSMUSG00000026657" source="2830" target="2454" cy:directed="1"/>
      <edge id="38816" label="mmu-miR-101a-3p (miRNA-mRNA) ENSMUSG00000026442" source="2830" target="385" cy:directed="1"/>
      <edge id="38815" label="mmu-miR-101a-3p (miRNA-mRNA) ENSMUSG00000026509" source="2830" target="389" cy:directed="1"/>
      <edge id="38814" label="mmu-miR-101a-3p (miRNA-mRNA) ENSMUSG00000026782" source="2830" target="396" cy:directed="1"/>
      <edge id="38813" label="mmu-miR-101a-3p (miRNA-mRNA) ENSMUSG00000024664" source="2830" target="1437" cy:directed="1"/>
      <edge id="38812" label="mmu-miR-101a-3p (miRNA-mRNA) ENSMUSG00000025903" source="2830" target="1500" cy:directed="1"/>
      <edge id="38811" label="mmu-miR-101a-3p (miRNA-mRNA) ENSMUSG00000025198" source="2830" target="1469" cy:directed="1"/>
      <edge id="38810" label="mmu-miR-101a-3p (miRNA-mRNA) ENSMUSG00000025348" source="2830" target="1475" cy:directed="1"/>
      <edge id="38809" label="mmu-miR-101a-3p (miRNA-mRNA) ENSMUSG00000026335" source="2830" target="1019" cy:directed="1"/>
      <edge id="38808" label="mmu-miR-101a-3p (miRNA-mRNA) ENSMUSG00000025001" source="2830" target="351" cy:directed="1"/>
      <edge id="38807" label="mmu-miR-101a-3p (miRNA-mRNA) ENSMUSG00000025410" source="2830" target="361" cy:directed="1"/>
      <edge id="38806" label="mmu-miR-101a-3p (miRNA-mRNA) ENSMUSG00000026223" source="2830" target="1512" cy:directed="1"/>
      <edge id="38805" label="mmu-miR-101a-3p (miRNA-mRNA) ENSMUSG00000025790" source="2830" target="1496" cy:directed="1"/>
      <edge id="38804" label="mmu-miR-101a-3p (miRNA-mRNA) ENSMUSG00000025203" source="2830" target="1471" cy:directed="1"/>
      <edge id="38803" label="mmu-miR-101a-3p (miRNA-mRNA) ENSMUSG00000026103" source="2830" target="379" cy:directed="1"/>
      <edge id="38802" label="mmu-miR-101a-3p (miRNA-mRNA) ENSMUSG00000025969" source="2830" target="375" cy:directed="1"/>
      <edge id="38801" label="mmu-miR-101a-3p (miRNA-mRNA) ENSMUSG00000025154" source="2830" target="1465" cy:directed="1"/>
      <edge id="38800" label="mmu-miR-101a-3p (miRNA-mRNA) ENSMUSG00000026185" source="2830" target="1509" cy:directed="1"/>
      <edge id="38799" label="mmu-miR-101a-3p (miRNA-mRNA) ENSMUSG00000025582" source="2830" target="1488" cy:directed="1"/>
      <edge id="38798" label="mmu-miR-101a-3p (miRNA-mRNA) ENSMUSG00000025959" source="2830" target="374" cy:directed="1"/>
      <edge id="38797" label="mmu-miR-101a-3p (miRNA-mRNA) ENSMUSG00000025986" source="2830" target="1502" cy:directed="1"/>
      <edge id="38796" label="mmu-miR-101a-3p (miRNA-mRNA) ENSMUSG00000023017" source="2830" target="306" cy:directed="1"/>
      <edge id="38795" label="mmu-miR-101a-3p (miRNA-mRNA) ENSMUSG00000024479" source="2830" target="331" cy:directed="1"/>
      <edge id="38794" label="mmu-miR-101a-3p (miRNA-mRNA) ENSMUSG00000024302" source="2830" target="1419" cy:directed="1"/>
      <edge id="38793" label="mmu-miR-101a-3p (miRNA-mRNA) ENSMUSG00000024378" source="2830" target="330" cy:directed="1"/>
      <edge id="38792" label="mmu-miR-101a-3p (miRNA-mRNA) ENSMUSG00000024140" source="2830" target="324" cy:directed="1"/>
      <edge id="38791" label="mmu-miR-101a-3p (miRNA-mRNA) ENSMUSG00000024533" source="2830" target="1434" cy:directed="1"/>
      <edge id="38790" label="mmu-miR-101a-3p (miRNA-mRNA) ENSMUSG00000024548" source="2830" target="333" cy:directed="1"/>
      <edge id="38789" label="mmu-miR-101a-3p (miRNA-mRNA) ENSMUSG00000024411" source="2830" target="1424" cy:directed="1"/>
      <edge id="38788" label="mmu-miR-101a-3p (miRNA-mRNA) ENSMUSG00000024350" source="2830" target="2915" cy:directed="1"/>
      <edge id="38787" label="mmu-miR-101a-3p (miRNA-mRNA) ENSMUSG00000023827" source="2830" target="315" cy:directed="1"/>
      <edge id="38786" label="mmu-miR-101a-3p (miRNA-mRNA) ENSMUSG00000023092" source="2830" target="1393" cy:directed="1"/>
      <edge id="38785" label="mmu-miR-101a-3p (miRNA-mRNA) ENSMUSG00000022837" source="2830" target="2940" cy:directed="1"/>
      <edge id="38784" label="mmu-miR-101a-3p (miRNA-mRNA) ENSMUSG00000024511" source="2830" target="1430" cy:directed="1"/>
      <edge id="38783" label="mmu-miR-101a-3p (miRNA-mRNA) ENSMUSG00000024270" source="2830" target="2557" cy:directed="1"/>
      <edge id="38782" label="mmu-miR-101a-3p (miRNA-mRNA) ENSMUSG00000024431" source="2830" target="79" cy:directed="1"/>
      <edge id="38781" label="mmu-miR-101a-3p (miRNA-mRNA) ENSMUSG00000022551" source="2830" target="1368" cy:directed="1"/>
      <edge id="38780" label="mmu-miR-101a-3p (miRNA-mRNA) ENSMUSG00000022587" source="2830" target="1372" cy:directed="1"/>
      <edge id="38779" label="mmu-miR-101a-3p (miRNA-mRNA) ENSMUSG00000022094" source="2830" target="275" cy:directed="1"/>
      <edge id="38778" label="mmu-miR-101a-3p (miRNA-mRNA) ENSMUSG00000022419" source="2830" target="2852" cy:directed="1"/>
      <edge id="38777" label="mmu-miR-101a-3p (miRNA-mRNA) ENSMUSG00000022687" source="2830" target="1012" cy:directed="1"/>
      <edge id="38776" label="mmu-miR-101a-3p (miRNA-mRNA) ENSMUSG00000022051" source="2830" target="274" cy:directed="1"/>
      <edge id="38775" label="mmu-miR-101a-3p (miRNA-mRNA) ENSMUSG00000022656" source="2830" target="1377" cy:directed="1"/>
      <edge id="38774" label="mmu-miR-101a-3p (miRNA-mRNA) ENSMUSG00000022136" source="2830" target="276" cy:directed="1"/>
      <edge id="38773" label="mmu-miR-101a-3p (miRNA-mRNA) ENSMUSG00000022332" source="2830" target="1359" cy:directed="1"/>
      <edge id="38772" label="mmu-miR-101a-3p (miRNA-mRNA) ENSMUSG00000022637" source="2830" target="292" cy:directed="1"/>
      <edge id="38771" label="mmu-miR-101a-3p (miRNA-mRNA) ENSMUSG00000021831" source="2830" target="268" cy:directed="1"/>
      <edge id="38770" label="mmu-miR-101a-3p (miRNA-mRNA) ENSMUSG00000021700" source="2830" target="1335" cy:directed="1"/>
      <edge id="38769" label="mmu-miR-101a-3p (miRNA-mRNA) ENSMUSG00000021577" source="2830" target="2902" cy:directed="1"/>
      <edge id="38768" label="mmu-miR-101a-3p (miRNA-mRNA) ENSMUSG00000020773" source="2830" target="3043" cy:directed="1"/>
      <edge id="38767" label="mmu-miR-101a-3p (miRNA-mRNA) ENSMUSG00000020472" source="2830" target="1296" cy:directed="1"/>
      <edge id="38766" label="mmu-miR-101a-3p (miRNA-mRNA) ENSMUSG00000021175" source="2830" target="1316" cy:directed="1"/>
      <edge id="38765" label="mmu-miR-101a-3p (miRNA-mRNA) ENSMUSG00000020848" source="2830" target="3124" cy:directed="1"/>
      <edge id="38764" label="mmu-miR-101a-3p (miRNA-mRNA) ENSMUSG00000021062" source="2830" target="2936" cy:directed="1"/>
      <edge id="38763" label="mmu-miR-101a-3p (miRNA-mRNA) ENSMUSG00000020423" source="2830" target="1290" cy:directed="1"/>
      <edge id="38762" label="mmu-miR-101a-3p (miRNA-mRNA) ENSMUSG00000021379" source="2830" target="2532" cy:directed="1"/>
      <edge id="38761" label="mmu-miR-101a-3p (miRNA-mRNA) ENSMUSG00000020493" source="2830" target="2582" cy:directed="1"/>
      <edge id="38760" label="mmu-miR-101a-3p (miRNA-mRNA) ENSMUSG00000017639" source="2830" target="197" cy:directed="1"/>
      <edge id="38759" label="mmu-miR-101a-3p (miRNA-mRNA) ENSMUSG00000019877" source="2830" target="1267" cy:directed="1"/>
      <edge id="38758" label="mmu-miR-101a-3p (miRNA-mRNA) ENSMUSG00000019817" source="2830" target="215" cy:directed="1"/>
      <edge id="38757" label="mmu-miR-101a-3p (miRNA-mRNA) ENSMUSG00000019843" source="2830" target="1265" cy:directed="1"/>
      <edge id="38756" label="mmu-miR-101a-3p (miRNA-mRNA) ENSMUSG00000018800" source="2830" target="1252" cy:directed="1"/>
      <edge id="38755" label="mmu-miR-101a-3p (miRNA-mRNA) ENSMUSG00000018143" source="2830" target="1244" cy:directed="1"/>
      <edge id="38754" label="mmu-miR-101a-3p (miRNA-mRNA) ENSMUSG00000019124" source="2830" target="1259" cy:directed="1"/>
      <edge id="38753" label="mmu-miR-101a-3p (miRNA-mRNA) ENSMUSG00000020154" source="2830" target="2486" cy:directed="1"/>
      <edge id="38752" label="mmu-miR-101a-3p (miRNA-mRNA) ENSMUSG00000020044" source="2830" target="2894" cy:directed="1"/>
      <edge id="38751" label="mmu-miR-101a-3p (miRNA-mRNA) ENSMUSG00000020015" source="2830" target="224" cy:directed="1"/>
      <edge id="38750" label="mmu-miR-101a-3p (miRNA-mRNA) ENSMUSG00000018846" source="2830" target="1253" cy:directed="1"/>
      <edge id="38749" label="mmu-miR-101a-3p (miRNA-mRNA) ENSMUSG00000018199" source="2830" target="2858" cy:directed="1"/>
      <edge id="38748" label="mmu-miR-101a-3p (miRNA-mRNA) ENSMUSG00000018698" source="2830" target="3123" cy:directed="1"/>
      <edge id="38747" label="mmu-miR-101a-3p (miRNA-mRNA) ENSMUSG00000009394" source="2830" target="2933" cy:directed="1"/>
      <edge id="38746" label="mmu-miR-101a-3p (miRNA-mRNA) ENSMUSG00000015222" source="2830" target="1227" cy:directed="1"/>
      <edge id="38745" label="mmu-miR-101a-3p (miRNA-mRNA) ENSMUSG00000015837" source="2830" target="2912" cy:directed="1"/>
      <edge id="38744" label="mmu-miR-101a-3p (miRNA-mRNA) ENSMUSG00000006273" source="2830" target="2972" cy:directed="1"/>
      <edge id="38743" label="mmu-miR-101a-3p (miRNA-mRNA) ENSMUSG00000014602" source="2830" target="178" cy:directed="1"/>
      <edge id="38742" label="mmu-miR-101a-3p (miRNA-mRNA) ENSMUSG00000008734" source="2830" target="164" cy:directed="1"/>
      <edge id="38741" label="mmu-miR-101a-3p (miRNA-mRNA) ENSMUSG00000015647" source="2830" target="183" cy:directed="1"/>
      <edge id="38740" label="mmu-miR-101a-3p (miRNA-mRNA) ENSMUSG00000010122" source="2830" target="1209" cy:directed="1"/>
      <edge id="38739" label="mmu-miR-101a-3p (miRNA-mRNA) ENSMUSG00000016541" source="2830" target="1236" cy:directed="1"/>
      <edge id="38738" label="mmu-miR-101a-3p (miRNA-mRNA) ENSMUSG00000010505" source="2830" target="1002" cy:directed="1"/>
      <edge id="38737" label="mmu-miR-101a-3p (miRNA-mRNA) ENSMUSG00000010803" source="2830" target="1213" cy:directed="1"/>
      <edge id="38736" label="mmu-miR-101a-3p (miRNA-mRNA) ENSMUSG00000008398" source="2830" target="1125" cy:directed="1"/>
      <edge id="38735" label="mmu-miR-101a-3p (miRNA-mRNA) ENSMUSG00000010175" source="2830" target="72" cy:directed="1"/>
      <edge id="38734" label="mmu-miR-101a-3p (miRNA-mRNA) ENSMUSG00000002799" source="2830" target="130" cy:directed="1"/>
      <edge id="38733" label="mmu-miR-101a-3p (miRNA-mRNA) ENSMUSG00000003469" source="2830" target="134" cy:directed="1"/>
      <edge id="38732" label="mmu-miR-101a-3p (miRNA-mRNA) ENSMUSG00000002107" source="2830" target="1161" cy:directed="1"/>
      <edge id="38731" label="mmu-miR-101a-3p (miRNA-mRNA) ENSMUSG00000003518" source="2830" target="2970" cy:directed="1"/>
      <edge id="38730" label="mmu-miR-101a-3p (miRNA-mRNA) ENSMUSG00000000056" source="2830" target="114" cy:directed="1"/>
      <edge id="38729" label="mmu-miR-101a-3p (miRNA-mRNA) ENSMUSG00000001517" source="2830" target="987" cy:directed="1"/>
      <edge id="38728" label="mmu-miR-101a-3p (miRNA-mRNA) ENSMUSG00000000881" source="2830" target="1140" cy:directed="1"/>
      <edge id="38727" label="mmu-miR-101a-3p (miRNA-mRNA) ENSMUSG00000000567" source="2830" target="113" cy:directed="1"/>
      <edge id="38726" label="mmu-miR-101a-3p (miRNA-mRNA) ENSMUSG00000000416" source="2830" target="1135" cy:directed="1"/>
      <edge id="38725" label="mmu-miR-92b-3p (miRNA-mRNA) ENSMUSG00000048327" source="2829" target="2992" cy:directed="1"/>
      <edge id="38724" label="mmu-miR-92b-3p (miRNA-mRNA) ENSMUSG00000049866" source="2829" target="805" cy:directed="1"/>
      <edge id="38723" label="mmu-miR-92b-3p (miRNA-mRNA) ENSMUSG00000049878" source="2829" target="806" cy:directed="1"/>
      <edge id="38722" label="mmu-miR-92b-3p (miRNA-mRNA) ENSMUSG00000046794" source="2829" target="2679" cy:directed="1"/>
      <edge id="38721" label="mmu-miR-92b-3p (miRNA-mRNA) ENSMUSG00000048279" source="2829" target="2107" cy:directed="1"/>
      <edge id="38720" label="mmu-miR-92b-3p (miRNA-mRNA) ENSMUSG00000051341" source="2829" target="2519" cy:directed="1"/>
      <edge id="38719" label="mmu-miR-92b-3p (miRNA-mRNA) ENSMUSG00000040687" source="2829" target="2652" cy:directed="1"/>
      <edge id="38718" label="mmu-miR-92b-3p (miRNA-mRNA) ENSMUSG00000049892" source="2829" target="2129" cy:directed="1"/>
      <edge id="38717" label="mmu-miR-92b-3p (miRNA-mRNA) ENSMUSG00000050592" source="2829" target="1102" cy:directed="1"/>
      <edge id="38716" label="mmu-miR-92b-3p (miRNA-mRNA) ENSMUSG00000054150" source="2829" target="843" cy:directed="1"/>
      <edge id="38715" label="mmu-miR-92b-3p (miRNA-mRNA) ENSMUSG00000050473" source="2829" target="2645" cy:directed="1"/>
      <edge id="38714" label="mmu-miR-92b-3p (miRNA-mRNA) ENSMUSG00000042195" source="2829" target="2006" cy:directed="1"/>
      <edge id="38713" label="mmu-miR-92b-3p (miRNA-mRNA) ENSMUSG00000044966" source="2829" target="3076" cy:directed="1"/>
      <edge id="38712" label="mmu-miR-92b-3p (miRNA-mRNA) ENSMUSG00000040703" source="2829" target="3075" cy:directed="1"/>
      <edge id="38711" label="mmu-miR-92b-3p (miRNA-mRNA) ENSMUSG00000044060" source="2829" target="2908" cy:directed="1"/>
      <edge id="38710" label="mmu-miR-92b-3p (miRNA-mRNA) ENSMUSG00000037606" source="2829" target="629" cy:directed="1"/>
      <edge id="38709" label="mmu-miR-92b-3p (miRNA-mRNA) ENSMUSG00000039967" source="2829" target="1957" cy:directed="1"/>
      <edge id="38708" label="mmu-miR-92b-3p (miRNA-mRNA) ENSMUSG00000039087" source="2829" target="665" cy:directed="1"/>
      <edge id="38707" label="mmu-miR-92b-3p (miRNA-mRNA) ENSMUSG00000034724" source="2829" target="1826" cy:directed="1"/>
      <edge id="38706" label="mmu-miR-92b-3p (miRNA-mRNA) ENSMUSG00000039050" source="2829" target="663" cy:directed="1"/>
      <edge id="38705" label="mmu-miR-92b-3p (miRNA-mRNA) ENSMUSG00000035105" source="2829" target="586" cy:directed="1"/>
      <edge id="38704" label="mmu-miR-92b-3p (miRNA-mRNA) ENSMUSG00000037754" source="2829" target="1092" cy:directed="1"/>
      <edge id="38703" label="mmu-miR-92b-3p (miRNA-mRNA) ENSMUSG00000034663" source="2829" target="1823" cy:directed="1"/>
      <edge id="38702" label="mmu-miR-92b-3p (miRNA-mRNA) ENSMUSG00000034858" source="2829" target="1036" cy:directed="1"/>
      <edge id="38701" label="mmu-miR-92b-3p (miRNA-mRNA) ENSMUSG00000034593" source="2829" target="1091" cy:directed="1"/>
      <edge id="38700" label="mmu-miR-92b-3p (miRNA-mRNA) ENSMUSG00000040351" source="2829" target="684" cy:directed="1"/>
      <edge id="38699" label="mmu-miR-92b-3p (miRNA-mRNA) ENSMUSG00000038175" source="2829" target="644" cy:directed="1"/>
      <edge id="38698" label="mmu-miR-92b-3p (miRNA-mRNA) ENSMUSG00000037972" source="2829" target="642" cy:directed="1"/>
      <edge id="38697" label="mmu-miR-92b-3p (miRNA-mRNA) ENSMUSG00000039384" source="2829" target="1943" cy:directed="1"/>
      <edge id="38696" label="mmu-miR-92b-3p (miRNA-mRNA) ENSMUSG00000029772" source="2829" target="474" cy:directed="1"/>
      <edge id="38695" label="mmu-miR-92b-3p (miRNA-mRNA) ENSMUSG00000030830" source="2829" target="1695" cy:directed="1"/>
      <edge id="38694" label="mmu-miR-92b-3p (miRNA-mRNA) ENSMUSG00000031732" source="2829" target="2503" cy:directed="1"/>
      <edge id="38693" label="mmu-miR-92b-3p (miRNA-mRNA) ENSMUSG00000034349" source="2829" target="2459" cy:directed="1"/>
      <edge id="38692" label="mmu-miR-92b-3p (miRNA-mRNA) ENSMUSG00000031644" source="2829" target="1725" cy:directed="1"/>
      <edge id="38691" label="mmu-miR-92b-3p (miRNA-mRNA) ENSMUSG00000031441" source="2829" target="505" cy:directed="1"/>
      <edge id="38690" label="mmu-miR-92b-3p (miRNA-mRNA) ENSMUSG00000031903" source="2829" target="520" cy:directed="1"/>
      <edge id="38689" label="mmu-miR-92b-3p (miRNA-mRNA) ENSMUSG00000034413" source="2829" target="576" cy:directed="1"/>
      <edge id="38688" label="mmu-miR-92b-3p (miRNA-mRNA) ENSMUSG00000030102" source="2829" target="1674" cy:directed="1"/>
      <edge id="38687" label="mmu-miR-92b-3p (miRNA-mRNA) ENSMUSG00000032238" source="2829" target="527" cy:directed="1"/>
      <edge id="38686" label="mmu-miR-92b-3p (miRNA-mRNA) ENSMUSG00000025959" source="2829" target="374" cy:directed="1"/>
      <edge id="38685" label="mmu-miR-92b-3p (miRNA-mRNA) ENSMUSG00000028557" source="2829" target="443" cy:directed="1"/>
      <edge id="38684" label="mmu-miR-92b-3p (miRNA-mRNA) ENSMUSG00000029275" source="2829" target="73" cy:directed="1"/>
      <edge id="38683" label="mmu-miR-92b-3p (miRNA-mRNA) ENSMUSG00000026970" source="2829" target="1547" cy:directed="1"/>
      <edge id="38682" label="mmu-miR-92b-3p (miRNA-mRNA) ENSMUSG00000026395" source="2829" target="1521" cy:directed="1"/>
      <edge id="38681" label="mmu-miR-92b-3p (miRNA-mRNA) ENSMUSG00000028341" source="2829" target="436" cy:directed="1"/>
      <edge id="38680" label="mmu-miR-92b-3p (miRNA-mRNA) ENSMUSG00000026039" source="2829" target="3074" cy:directed="1"/>
      <edge id="38679" label="mmu-miR-92b-3p (miRNA-mRNA) ENSMUSG00000029287" source="2829" target="1119" cy:directed="1"/>
      <edge id="38678" label="mmu-miR-92b-3p (miRNA-mRNA) ENSMUSG00000025477" source="2829" target="362" cy:directed="1"/>
      <edge id="38677" label="mmu-miR-92b-3p (miRNA-mRNA) ENSMUSG00000027544" source="2829" target="108" cy:directed="1"/>
      <edge id="38676" label="mmu-miR-92b-3p (miRNA-mRNA) ENSMUSG00000026779" source="2829" target="1539" cy:directed="1"/>
      <edge id="38675" label="mmu-miR-92b-3p (miRNA-mRNA) ENSMUSG00000028634" source="2829" target="446" cy:directed="1"/>
      <edge id="38674" label="mmu-miR-92b-3p (miRNA-mRNA) ENSMUSG00000025888" source="2829" target="2636" cy:directed="1"/>
      <edge id="38673" label="mmu-miR-92b-3p (miRNA-mRNA) ENSMUSG00000028649" source="2829" target="1620" cy:directed="1"/>
      <edge id="38672" label="mmu-miR-92b-3p (miRNA-mRNA) ENSMUSG00000026103" source="2829" target="379" cy:directed="1"/>
      <edge id="38671" label="mmu-miR-92b-3p (miRNA-mRNA) ENSMUSG00000023832" source="2829" target="1082" cy:directed="1"/>
      <edge id="38670" label="mmu-miR-92b-3p (miRNA-mRNA) ENSMUSG00000022637" source="2829" target="292" cy:directed="1"/>
      <edge id="38669" label="mmu-miR-92b-3p (miRNA-mRNA) ENSMUSG00000022707" source="2829" target="1379" cy:directed="1"/>
      <edge id="38668" label="mmu-miR-92b-3p (miRNA-mRNA) ENSMUSG00000024431" source="2829" target="79" cy:directed="1"/>
      <edge id="38667" label="mmu-miR-92b-3p (miRNA-mRNA) ENSMUSG00000024525" source="2829" target="1433" cy:directed="1"/>
      <edge id="38666" label="mmu-miR-92b-3p (miRNA-mRNA) ENSMUSG00000021701" source="2829" target="264" cy:directed="1"/>
      <edge id="38665" label="mmu-miR-92b-3p (miRNA-mRNA) ENSMUSG00000021175" source="2829" target="1316" cy:directed="1"/>
      <edge id="38664" label="mmu-miR-92b-3p (miRNA-mRNA) ENSMUSG00000020015" source="2829" target="224" cy:directed="1"/>
      <edge id="38663" label="mmu-miR-92b-3p (miRNA-mRNA) ENSMUSG00000004880" source="2829" target="1182" cy:directed="1"/>
      <edge id="38662" label="mmu-miR-92b-3p (miRNA-mRNA) ENSMUSG00000003865" source="2829" target="2856" cy:directed="1"/>
      <edge id="38661" label="mmu-miR-92b-3p (miRNA-mRNA) ENSMUSG00000001467" source="2829" target="1150" cy:directed="1"/>
      <edge id="38660" label="mmu-miR-92b-3p (miRNA-mRNA) ENSMUSG00000020330" source="2829" target="2901" cy:directed="1"/>
      <edge id="38659" label="mmu-miR-92b-3p (miRNA-mRNA) ENSMUSG00000016541" source="2829" target="1236" cy:directed="1"/>
      <edge id="38658" label="mmu-miR-92b-3p (miRNA-mRNA) ENSMUSG00000020493" source="2829" target="2582" cy:directed="1"/>
      <edge id="38657" label="mmu-miR-92b-3p (miRNA-mRNA) ENSMUSG00000018846" source="2829" target="1253" cy:directed="1"/>
      <edge id="38656" label="mmu-miR-92b-3p (miRNA-mRNA) ENSMUSG00000002578" source="2829" target="2910" cy:directed="1"/>
      <edge id="38655" label="mmu-miR-92b-3p (miRNA-mRNA) ENSMUSG00000011752" source="2829" target="170" cy:directed="1"/>
      <edge id="38654" label="mmu-miR-92b-3p (miRNA-mRNA) ENSMUSG00000020423" source="2829" target="1290" cy:directed="1"/>
      <edge id="38653" label="mmu-miR-92b-3p (miRNA-mRNA) ENSMUSG00000014905" source="2829" target="2857" cy:directed="1"/>
      <edge id="38652" label="mmu-miR-92b-3p (miRNA-mRNA) ENSMUSG00000000555" source="2829" target="119" cy:directed="1"/>
      <edge id="38651" label="mmu-let-7e-5p (miRNA-mRNA) ENSMUSG00000065979" source="2828" target="3036" cy:directed="1"/>
      <edge id="38650" label="mmu-let-7e-5p (miRNA-mRNA) ENSMUSG00000063889" source="2828" target="2909" cy:directed="1"/>
      <edge id="38649" label="mmu-let-7e-5p (miRNA-mRNA) ENSMUSG00000058454" source="2828" target="875" cy:directed="1"/>
      <edge id="38648" label="mmu-let-7e-5p (miRNA-mRNA) ENSMUSG00000057880" source="2828" target="2229" cy:directed="1"/>
      <edge id="38647" label="mmu-let-7e-5p (miRNA-mRNA) ENSMUSG00000057335" source="2828" target="869" cy:directed="1"/>
      <edge id="38646" label="mmu-let-7e-5p (miRNA-mRNA) ENSMUSG00000067889" source="2828" target="2300" cy:directed="1"/>
      <edge id="38645" label="mmu-let-7e-5p (miRNA-mRNA) ENSMUSG00000068587" source="2828" target="2306" cy:directed="1"/>
      <edge id="38644" label="mmu-let-7e-5p (miRNA-mRNA) ENSMUSG00000056724" source="2828" target="2215" cy:directed="1"/>
      <edge id="38643" label="mmu-let-7e-5p (miRNA-mRNA) ENSMUSG00000078234" source="2828" target="2367" cy:directed="1"/>
      <edge id="38642" label="mmu-let-7e-5p (miRNA-mRNA) ENSMUSG00000068742" source="2828" target="925" cy:directed="1"/>
      <edge id="38641" label="mmu-let-7e-5p (miRNA-mRNA) ENSMUSG00000058706" source="2828" target="2998" cy:directed="1"/>
      <edge id="38640" label="mmu-let-7e-5p (miRNA-mRNA) ENSMUSG00000066152" source="2828" target="2287" cy:directed="1"/>
      <edge id="38639" label="mmu-let-7e-5p (miRNA-mRNA) ENSMUSG00000078515" source="2828" target="2372" cy:directed="1"/>
      <edge id="38638" label="mmu-let-7e-5p (miRNA-mRNA) ENSMUSG00000046668" source="2828" target="770" cy:directed="1"/>
      <edge id="38637" label="mmu-let-7e-5p (miRNA-mRNA) ENSMUSG00000045775" source="2828" target="3035" cy:directed="1"/>
      <edge id="38636" label="mmu-let-7e-5p (miRNA-mRNA) ENSMUSG00000050777" source="2828" target="815" cy:directed="1"/>
      <edge id="38635" label="mmu-let-7e-5p (miRNA-mRNA) ENSMUSG00000049858" source="2828" target="2127" cy:directed="1"/>
      <edge id="38634" label="mmu-let-7e-5p (miRNA-mRNA) ENSMUSG00000046070" source="2828" target="761" cy:directed="1"/>
      <edge id="38633" label="mmu-let-7e-5p (miRNA-mRNA) ENSMUSG00000045374" source="2828" target="2058" cy:directed="1"/>
      <edge id="38632" label="mmu-let-7e-5p (miRNA-mRNA) ENSMUSG00000050914" source="2828" target="3034" cy:directed="1"/>
      <edge id="38631" label="mmu-let-7e-5p (miRNA-mRNA) ENSMUSG00000047797" source="2828" target="780" cy:directed="1"/>
      <edge id="38630" label="mmu-let-7e-5p (miRNA-mRNA) ENSMUSG00000051166" source="2828" target="1057" cy:directed="1"/>
      <edge id="38629" label="mmu-let-7e-5p (miRNA-mRNA) ENSMUSG00000053617" source="2828" target="2175" cy:directed="1"/>
      <edge id="38628" label="mmu-let-7e-5p (miRNA-mRNA) ENSMUSG00000053470" source="2828" target="836" cy:directed="1"/>
      <edge id="38627" label="mmu-let-7e-5p (miRNA-mRNA) ENSMUSG00000052384" source="2828" target="2162" cy:directed="1"/>
      <edge id="38626" label="mmu-let-7e-5p (miRNA-mRNA) ENSMUSG00000044783" source="2828" target="3001" cy:directed="1"/>
      <edge id="38625" label="mmu-let-7e-5p (miRNA-mRNA) ENSMUSG00000044468" source="2828" target="745" cy:directed="1"/>
      <edge id="38624" label="mmu-let-7e-5p (miRNA-mRNA) ENSMUSG00000048012" source="2828" target="2928" cy:directed="1"/>
      <edge id="38623" label="mmu-let-7e-5p (miRNA-mRNA) ENSMUSG00000051185" source="2828" target="2145" cy:directed="1"/>
      <edge id="38622" label="mmu-let-7e-5p (miRNA-mRNA) ENSMUSG00000050240" source="2828" target="2133" cy:directed="1"/>
      <edge id="38621" label="mmu-let-7e-5p (miRNA-mRNA) ENSMUSG00000039168" source="2828" target="668" cy:directed="1"/>
      <edge id="38620" label="mmu-let-7e-5p (miRNA-mRNA) ENSMUSG00000041642" source="2828" target="2883" cy:directed="1"/>
      <edge id="38619" label="mmu-let-7e-5p (miRNA-mRNA) ENSMUSG00000042148" source="2828" target="2855" cy:directed="1"/>
      <edge id="38618" label="mmu-let-7e-5p (miRNA-mRNA) ENSMUSG00000039616" source="2828" target="1948" cy:directed="1"/>
      <edge id="38617" label="mmu-let-7e-5p (miRNA-mRNA) ENSMUSG00000040296" source="2828" target="1967" cy:directed="1"/>
      <edge id="38616" label="mmu-let-7e-5p (miRNA-mRNA) ENSMUSG00000040249" source="2828" target="105" cy:directed="1"/>
      <edge id="38615" label="mmu-let-7e-5p (miRNA-mRNA) ENSMUSG00000039087" source="2828" target="665" cy:directed="1"/>
      <edge id="38614" label="mmu-let-7e-5p (miRNA-mRNA) ENSMUSG00000041920" source="2828" target="2905" cy:directed="1"/>
      <edge id="38613" label="mmu-let-7e-5p (miRNA-mRNA) ENSMUSG00000039158" source="2828" target="1934" cy:directed="1"/>
      <edge id="38612" label="mmu-let-7e-5p (miRNA-mRNA) ENSMUSG00000039114" source="2828" target="1931" cy:directed="1"/>
      <edge id="38611" label="mmu-let-7e-5p (miRNA-mRNA) ENSMUSG00000040699" source="2828" target="2989" cy:directed="1"/>
      <edge id="38610" label="mmu-let-7e-5p (miRNA-mRNA) ENSMUSG00000040462" source="2828" target="689" cy:directed="1"/>
      <edge id="38609" label="mmu-let-7e-5p (miRNA-mRNA) ENSMUSG00000037679" source="2828" target="634" cy:directed="1"/>
      <edge id="38608" label="mmu-let-7e-5p (miRNA-mRNA) ENSMUSG00000038507" source="2828" target="3033" cy:directed="1"/>
      <edge id="38607" label="mmu-let-7e-5p (miRNA-mRNA) ENSMUSG00000038530" source="2828" target="1127" cy:directed="1"/>
      <edge id="38606" label="mmu-let-7e-5p (miRNA-mRNA) ENSMUSG00000037348" source="2828" target="1887" cy:directed="1"/>
      <edge id="38605" label="mmu-let-7e-5p (miRNA-mRNA) ENSMUSG00000038280" source="2828" target="2661" cy:directed="1"/>
      <edge id="38604" label="mmu-let-7e-5p (miRNA-mRNA) ENSMUSG00000036932" source="2828" target="1880" cy:directed="1"/>
      <edge id="38603" label="mmu-let-7e-5p (miRNA-mRNA) ENSMUSG00000037071" source="2828" target="616" cy:directed="1"/>
      <edge id="38602" label="mmu-let-7e-5p (miRNA-mRNA) ENSMUSG00000038224" source="2828" target="3008" cy:directed="1"/>
      <edge id="38601" label="mmu-let-7e-5p (miRNA-mRNA) ENSMUSG00000038332" source="2828" target="2879" cy:directed="1"/>
      <edge id="38600" label="mmu-let-7e-5p (miRNA-mRNA) ENSMUSG00000038298" source="2828" target="3032" cy:directed="1"/>
      <edge id="38599" label="mmu-let-7e-5p (miRNA-mRNA) ENSMUSG00000034724" source="2828" target="1826" cy:directed="1"/>
      <edge id="38598" label="mmu-let-7e-5p (miRNA-mRNA) ENSMUSG00000035473" source="2828" target="1841" cy:directed="1"/>
      <edge id="38597" label="mmu-let-7e-5p (miRNA-mRNA) ENSMUSG00000037235" source="2828" target="619" cy:directed="1"/>
      <edge id="38596" label="mmu-let-7e-5p (miRNA-mRNA) ENSMUSG00000034853" source="2828" target="1830" cy:directed="1"/>
      <edge id="38595" label="mmu-let-7e-5p (miRNA-mRNA) ENSMUSG00000032018" source="2828" target="525" cy:directed="1"/>
      <edge id="38594" label="mmu-let-7e-5p (miRNA-mRNA) ENSMUSG00000031902" source="2828" target="1740" cy:directed="1"/>
      <edge id="38593" label="mmu-let-7e-5p (miRNA-mRNA) ENSMUSG00000032014" source="2828" target="1745" cy:directed="1"/>
      <edge id="38592" label="mmu-let-7e-5p (miRNA-mRNA) ENSMUSG00000034663" source="2828" target="1823" cy:directed="1"/>
      <edge id="38591" label="mmu-let-7e-5p (miRNA-mRNA) ENSMUSG00000033685" source="2828" target="564" cy:directed="1"/>
      <edge id="38590" label="mmu-let-7e-5p (miRNA-mRNA) ENSMUSG00000034379" source="2828" target="1033" cy:directed="1"/>
      <edge id="38589" label="mmu-let-7e-5p (miRNA-mRNA) ENSMUSG00000034349" source="2828" target="2459" cy:directed="1"/>
      <edge id="38588" label="mmu-let-7e-5p (miRNA-mRNA) ENSMUSG00000032528" source="2828" target="538" cy:directed="1"/>
      <edge id="38587" label="mmu-let-7e-5p (miRNA-mRNA) ENSMUSG00000033149" source="2828" target="2985" cy:directed="1"/>
      <edge id="38586" label="mmu-let-7e-5p (miRNA-mRNA) ENSMUSG00000032114" source="2828" target="2456" cy:directed="1"/>
      <edge id="38585" label="mmu-let-7e-5p (miRNA-mRNA) ENSMUSG00000032047" source="2828" target="1748" cy:directed="1"/>
      <edge id="38584" label="mmu-let-7e-5p (miRNA-mRNA) ENSMUSG00000031903" source="2828" target="520" cy:directed="1"/>
      <edge id="38583" label="mmu-let-7e-5p (miRNA-mRNA) ENSMUSG00000034614" source="2828" target="3031" cy:directed="1"/>
      <edge id="38582" label="mmu-let-7e-5p (miRNA-mRNA) ENSMUSG00000031444" source="2828" target="1714" cy:directed="1"/>
      <edge id="38581" label="mmu-let-7e-5p (miRNA-mRNA) ENSMUSG00000028517" source="2828" target="441" cy:directed="1"/>
      <edge id="38580" label="mmu-let-7e-5p (miRNA-mRNA) ENSMUSG00000030737" source="2828" target="3030" cy:directed="1"/>
      <edge id="38579" label="mmu-let-7e-5p (miRNA-mRNA) ENSMUSG00000028211" source="2828" target="432" cy:directed="1"/>
      <edge id="38578" label="mmu-let-7e-5p (miRNA-mRNA) ENSMUSG00000030972" source="2828" target="3029" cy:directed="1"/>
      <edge id="38577" label="mmu-let-7e-5p (miRNA-mRNA) ENSMUSG00000031378" source="2828" target="1713" cy:directed="1"/>
      <edge id="38576" label="mmu-let-7e-5p (miRNA-mRNA) ENSMUSG00000030747" source="2828" target="490" cy:directed="1"/>
      <edge id="38575" label="mmu-let-7e-5p (miRNA-mRNA) ENSMUSG00000028976" source="2828" target="3028" cy:directed="1"/>
      <edge id="38574" label="mmu-let-7e-5p (miRNA-mRNA) ENSMUSG00000028527" source="2828" target="1615" cy:directed="1"/>
      <edge id="38573" label="mmu-let-7e-5p (miRNA-mRNA) ENSMUSG00000029761" source="2828" target="1662" cy:directed="1"/>
      <edge id="38572" label="mmu-let-7e-5p (miRNA-mRNA) ENSMUSG00000030867" source="2828" target="3027" cy:directed="1"/>
      <edge id="38571" label="mmu-let-7e-5p (miRNA-mRNA) ENSMUSG00000030830" source="2828" target="1695" cy:directed="1"/>
      <edge id="38570" label="mmu-let-7e-5p (miRNA-mRNA) ENSMUSG00000028132" source="2828" target="1600" cy:directed="1"/>
      <edge id="38569" label="mmu-let-7e-5p (miRNA-mRNA) ENSMUSG00000028403" source="2828" target="2430" cy:directed="1"/>
      <edge id="38568" label="mmu-let-7e-5p (miRNA-mRNA) ENSMUSG00000028649" source="2828" target="1620" cy:directed="1"/>
      <edge id="38567" label="mmu-let-7e-5p (miRNA-mRNA) ENSMUSG00000031381" source="2828" target="503" cy:directed="1"/>
      <edge id="38566" label="mmu-let-7e-5p (miRNA-mRNA) ENSMUSG00000029408" source="2828" target="1646" cy:directed="1"/>
      <edge id="38565" label="mmu-let-7e-5p (miRNA-mRNA) ENSMUSG00000031503" source="2828" target="3026" cy:directed="1"/>
      <edge id="38564" label="mmu-let-7e-5p (miRNA-mRNA) ENSMUSG00000028518" source="2828" target="1612" cy:directed="1"/>
      <edge id="38563" label="mmu-let-7e-5p (miRNA-mRNA) ENSMUSG00000029287" source="2828" target="1119" cy:directed="1"/>
      <edge id="38562" label="mmu-let-7e-5p (miRNA-mRNA) ENSMUSG00000029661" source="2828" target="1658" cy:directed="1"/>
      <edge id="38561" label="mmu-let-7e-5p (miRNA-mRNA) ENSMUSG00000027346" source="2828" target="1561" cy:directed="1"/>
      <edge id="38560" label="mmu-let-7e-5p (miRNA-mRNA) ENSMUSG00000026398" source="2828" target="106" cy:directed="1"/>
      <edge id="38559" label="mmu-let-7e-5p (miRNA-mRNA) ENSMUSG00000028076" source="2828" target="1595" cy:directed="1"/>
      <edge id="38558" label="mmu-let-7e-5p (miRNA-mRNA) ENSMUSG00000027715" source="2828" target="420" cy:directed="1"/>
      <edge id="38557" label="mmu-let-7e-5p (miRNA-mRNA) ENSMUSG00000026103" source="2828" target="379" cy:directed="1"/>
      <edge id="38556" label="mmu-let-7e-5p (miRNA-mRNA) ENSMUSG00000026223" source="2828" target="1512" cy:directed="1"/>
      <edge id="38555" label="mmu-let-7e-5p (miRNA-mRNA) ENSMUSG00000025271" source="2828" target="3025" cy:directed="1"/>
      <edge id="38554" label="mmu-let-7e-5p (miRNA-mRNA) ENSMUSG00000026395" source="2828" target="1521" cy:directed="1"/>
      <edge id="38553" label="mmu-let-7e-5p (miRNA-mRNA) ENSMUSG00000026107" source="2828" target="380" cy:directed="1"/>
      <edge id="38552" label="mmu-let-7e-5p (miRNA-mRNA) ENSMUSG00000026475" source="2828" target="1527" cy:directed="1"/>
      <edge id="38551" label="mmu-let-7e-5p (miRNA-mRNA) ENSMUSG00000025969" source="2828" target="375" cy:directed="1"/>
      <edge id="38550" label="mmu-let-7e-5p (miRNA-mRNA) ENSMUSG00000025203" source="2828" target="1471" cy:directed="1"/>
      <edge id="38549" label="mmu-let-7e-5p (miRNA-mRNA) ENSMUSG00000025207" source="2828" target="1472" cy:directed="1"/>
      <edge id="38548" label="mmu-let-7e-5p (miRNA-mRNA) ENSMUSG00000026970" source="2828" target="1547" cy:directed="1"/>
      <edge id="38547" label="mmu-let-7e-5p (miRNA-mRNA) ENSMUSG00000024590" source="2828" target="336" cy:directed="1"/>
      <edge id="38546" label="mmu-let-7e-5p (miRNA-mRNA) ENSMUSG00000024664" source="2828" target="1437" cy:directed="1"/>
      <edge id="38545" label="mmu-let-7e-5p (miRNA-mRNA) ENSMUSG00000022742" source="2828" target="294" cy:directed="1"/>
      <edge id="38544" label="mmu-let-7e-5p (miRNA-mRNA) ENSMUSG00000024401" source="2828" target="2453" cy:directed="1"/>
      <edge id="38543" label="mmu-let-7e-5p (miRNA-mRNA) ENSMUSG00000024349" source="2828" target="328" cy:directed="1"/>
      <edge id="38542" label="mmu-let-7e-5p (miRNA-mRNA) ENSMUSG00000022637" source="2828" target="292" cy:directed="1"/>
      <edge id="38541" label="mmu-let-7e-5p (miRNA-mRNA) ENSMUSG00000025161" source="2828" target="1466" cy:directed="1"/>
      <edge id="38540" label="mmu-let-7e-5p (miRNA-mRNA) ENSMUSG00000024818" source="2828" target="1444" cy:directed="1"/>
      <edge id="38539" label="mmu-let-7e-5p (miRNA-mRNA) ENSMUSG00000024308" source="2828" target="2585" cy:directed="1"/>
      <edge id="38538" label="mmu-let-7e-5p (miRNA-mRNA) ENSMUSG00000021559" source="2828" target="1328" cy:directed="1"/>
      <edge id="38537" label="mmu-let-7e-5p (miRNA-mRNA) ENSMUSG00000021733" source="2828" target="1337" cy:directed="1"/>
      <edge id="38536" label="mmu-let-7e-5p (miRNA-mRNA) ENSMUSG00000024063" source="2828" target="1411" cy:directed="1"/>
      <edge id="38535" label="mmu-let-7e-5p (miRNA-mRNA) ENSMUSG00000022105" source="2828" target="89" cy:directed="1"/>
      <edge id="38534" label="mmu-let-7e-5p (miRNA-mRNA) ENSMUSG00000025185" source="2828" target="357" cy:directed="1"/>
      <edge id="38533" label="mmu-let-7e-5p (miRNA-mRNA) ENSMUSG00000022358" source="2828" target="2845" cy:directed="1"/>
      <edge id="38532" label="mmu-let-7e-5p (miRNA-mRNA) ENSMUSG00000022853" source="2828" target="1384" cy:directed="1"/>
      <edge id="38531" label="mmu-let-7e-5p (miRNA-mRNA) ENSMUSG00000020696" source="2828" target="1303" cy:directed="1"/>
      <edge id="38530" label="mmu-let-7e-5p (miRNA-mRNA) ENSMUSG00000018501" source="2828" target="84" cy:directed="1"/>
      <edge id="38529" label="mmu-let-7e-5p (miRNA-mRNA) ENSMUSG00000021196" source="2828" target="254" cy:directed="1"/>
      <edge id="38528" label="mmu-let-7e-5p (miRNA-mRNA) ENSMUSG00000016541" source="2828" target="1236" cy:directed="1"/>
      <edge id="38527" label="mmu-let-7e-5p (miRNA-mRNA) ENSMUSG00000021364" source="2828" target="1324" cy:directed="1"/>
      <edge id="38526" label="mmu-let-7e-5p (miRNA-mRNA) ENSMUSG00000019864" source="2828" target="2634" cy:directed="1"/>
      <edge id="38525" label="mmu-let-7e-5p (miRNA-mRNA) ENSMUSG00000019838" source="2828" target="1264" cy:directed="1"/>
      <edge id="38524" label="mmu-let-7e-5p (miRNA-mRNA) ENSMUSG00000020184" source="2828" target="87" cy:directed="1"/>
      <edge id="38523" label="mmu-let-7e-5p (miRNA-mRNA) ENSMUSG00000016534" source="2828" target="1235" cy:directed="1"/>
      <edge id="38522" label="mmu-let-7e-5p (miRNA-mRNA) ENSMUSG00000018199" source="2828" target="2858" cy:directed="1"/>
      <edge id="38521" label="mmu-let-7e-5p (miRNA-mRNA) ENSMUSG00000017390" source="2828" target="2483" cy:directed="1"/>
      <edge id="38520" label="mmu-let-7e-5p (miRNA-mRNA) ENSMUSG00000020423" source="2828" target="1290" cy:directed="1"/>
      <edge id="38519" label="mmu-let-7e-5p (miRNA-mRNA) ENSMUSG00000019564" source="2828" target="212" cy:directed="1"/>
      <edge id="38518" label="mmu-let-7e-5p (miRNA-mRNA) ENSMUSG00000020105" source="2828" target="225" cy:directed="1"/>
      <edge id="38517" label="mmu-let-7e-5p (miRNA-mRNA) ENSMUSG00000009378" source="2828" target="1205" cy:directed="1"/>
      <edge id="38516" label="mmu-let-7e-5p (miRNA-mRNA) ENSMUSG00000013160" source="2828" target="2607" cy:directed="1"/>
      <edge id="38515" label="mmu-let-7e-5p (miRNA-mRNA) ENSMUSG00000006378" source="2828" target="1192" cy:directed="1"/>
      <edge id="38514" label="mmu-let-7e-5p (miRNA-mRNA) ENSMUSG00000008090" source="2828" target="163" cy:directed="1"/>
      <edge id="38513" label="mmu-let-7e-5p (miRNA-mRNA) ENSMUSG00000004270" source="2828" target="139" cy:directed="1"/>
      <edge id="38512" label="mmu-let-7e-5p (miRNA-mRNA) ENSMUSG00000005514" source="2828" target="3004" cy:directed="1"/>
      <edge id="38511" label="mmu-let-7e-5p (miRNA-mRNA) ENSMUSG00000015112" source="2828" target="179" cy:directed="1"/>
      <edge id="38510" label="mmu-let-7e-5p (miRNA-mRNA) ENSMUSG00000002107" source="2828" target="1161" cy:directed="1"/>
      <edge id="38509" label="mmu-let-7e-5p (miRNA-mRNA) ENSMUSG00000009646" source="2828" target="1207" cy:directed="1"/>
      <edge id="38508" label="mmu-let-7e-5p (miRNA-mRNA) ENSMUSG00000001663" source="2828" target="1152" cy:directed="1"/>
      <edge id="38507" label="mmu-let-7e-5p (miRNA-mRNA) ENSMUSG00000003518" source="2828" target="2970" cy:directed="1"/>
      <edge id="38506" label="mmu-let-7e-5p (miRNA-mRNA) ENSMUSG00000004558" source="2828" target="1179" cy:directed="1"/>
      <edge id="38505" label="mmu-let-7e-5p (miRNA-mRNA) ENSMUSG00000012443" source="2828" target="1218" cy:directed="1"/>
      <edge id="38504" label="mmu-let-7e-5p (miRNA-mRNA) ENSMUSG00000005268" source="2828" target="997" cy:directed="1"/>
      <edge id="38503" label="mmu-let-7e-5p (miRNA-mRNA) ENSMUSG00000014905" source="2828" target="2857" cy:directed="1"/>
      <edge id="38502" label="mmu-let-7e-5p (miRNA-mRNA) ENSMUSG00000015745" source="2828" target="1076" cy:directed="1"/>
      <edge id="38501" label="mmu-let-7e-5p (miRNA-mRNA) ENSMUSG00000004880" source="2828" target="1182" cy:directed="1"/>
      <edge id="38500" label="ENSMUSG00000086782 (lincRNA-miRNA) mmu-miR-125b-5p" source="2827" target="2826" cy:directed="1"/>
      <edge id="38499" label="mmu-miR-125b-5p (miRNA-mRNA) ENSMUSG00000066357" source="2826" target="2602" cy:directed="1"/>
      <edge id="38498" label="mmu-miR-125b-5p (miRNA-mRNA) ENSMUSG00000062078" source="2826" target="898" cy:directed="1"/>
      <edge id="38497" label="mmu-miR-125b-5p (miRNA-mRNA) ENSMUSG00000070304" source="2826" target="2999" cy:directed="1"/>
      <edge id="38496" label="mmu-miR-125b-5p (miRNA-mRNA) ENSMUSG00000067889" source="2826" target="2300" cy:directed="1"/>
      <edge id="38495" label="mmu-miR-125b-5p (miRNA-mRNA) ENSMUSG00000070733" source="2826" target="933" cy:directed="1"/>
      <edge id="38494" label="mmu-miR-125b-5p (miRNA-mRNA) ENSMUSG00000058975" source="2826" target="877" cy:directed="1"/>
      <edge id="38493" label="mmu-miR-125b-5p (miRNA-mRNA) ENSMUSG00000058706" source="2826" target="2998" cy:directed="1"/>
      <edge id="38492" label="mmu-miR-125b-5p (miRNA-mRNA) ENSMUSG00000060961" source="2826" target="2254" cy:directed="1"/>
      <edge id="38491" label="mmu-miR-125b-5p (miRNA-mRNA) ENSMUSG00000063160" source="2826" target="2997" cy:directed="1"/>
      <edge id="38490" label="mmu-miR-125b-5p (miRNA-mRNA) ENSMUSG00000066278" source="2826" target="2289" cy:directed="1"/>
      <edge id="38489" label="mmu-miR-125b-5p (miRNA-mRNA) ENSMUSG00000063531" source="2826" target="905" cy:directed="1"/>
      <edge id="38488" label="mmu-miR-125b-5p (miRNA-mRNA) ENSMUSG00000059742" source="2826" target="1062" cy:directed="1"/>
      <edge id="38487" label="mmu-miR-125b-5p (miRNA-mRNA) ENSMUSG00000059791" source="2826" target="2996" cy:directed="1"/>
      <edge id="38486" label="mmu-miR-125b-5p (miRNA-mRNA) ENSMUSG00000070056" source="2826" target="2854" cy:directed="1"/>
      <edge id="38485" label="mmu-miR-125b-5p (miRNA-mRNA) ENSMUSG00000056973" source="2826" target="2218" cy:directed="1"/>
      <edge id="38484" label="mmu-miR-125b-5p (miRNA-mRNA) ENSMUSG00000058454" source="2826" target="875" cy:directed="1"/>
      <edge id="38483" label="mmu-miR-125b-5p (miRNA-mRNA) ENSMUSG00000051483" source="2826" target="2150" cy:directed="1"/>
      <edge id="38482" label="mmu-miR-125b-5p (miRNA-mRNA) ENSMUSG00000055980" source="2826" target="859" cy:directed="1"/>
      <edge id="38481" label="mmu-miR-125b-5p (miRNA-mRNA) ENSMUSG00000054027" source="2826" target="2995" cy:directed="1"/>
      <edge id="38480" label="mmu-miR-125b-5p (miRNA-mRNA) ENSMUSG00000054793" source="2826" target="849" cy:directed="1"/>
      <edge id="38479" label="mmu-miR-125b-5p (miRNA-mRNA) ENSMUSG00000058076" source="2826" target="2662" cy:directed="1"/>
      <edge id="38478" label="mmu-miR-125b-5p (miRNA-mRNA) ENSMUSG00000058297" source="2826" target="1060" cy:directed="1"/>
      <edge id="38477" label="mmu-miR-125b-5p (miRNA-mRNA) ENSMUSG00000057716" source="2826" target="2228" cy:directed="1"/>
      <edge id="38476" label="mmu-miR-125b-5p (miRNA-mRNA) ENSMUSG00000057789" source="2826" target="2623" cy:directed="1"/>
      <edge id="38475" label="mmu-miR-125b-5p (miRNA-mRNA) ENSMUSG00000055730" source="2826" target="2204" cy:directed="1"/>
      <edge id="38474" label="mmu-miR-125b-5p (miRNA-mRNA) ENSMUSG00000052684" source="2826" target="90" cy:directed="1"/>
      <edge id="38473" label="mmu-miR-125b-5p (miRNA-mRNA) ENSMUSG00000054150" source="2826" target="843" cy:directed="1"/>
      <edge id="38472" label="mmu-miR-125b-5p (miRNA-mRNA) ENSMUSG00000054434" source="2826" target="2994" cy:directed="1"/>
      <edge id="38471" label="mmu-miR-125b-5p (miRNA-mRNA) ENSMUSG00000051344" source="2826" target="2149" cy:directed="1"/>
      <edge id="38470" label="mmu-miR-125b-5p (miRNA-mRNA) ENSMUSG00000048988" source="2826" target="2118" cy:directed="1"/>
      <edge id="38469" label="mmu-miR-125b-5p (miRNA-mRNA) ENSMUSG00000050148" source="2826" target="809" cy:directed="1"/>
      <edge id="38468" label="mmu-miR-125b-5p (miRNA-mRNA) ENSMUSG00000046546" source="2826" target="767" cy:directed="1"/>
      <edge id="38467" label="mmu-miR-125b-5p (miRNA-mRNA) ENSMUSG00000045062" source="2826" target="2993" cy:directed="1"/>
      <edge id="38466" label="mmu-miR-125b-5p (miRNA-mRNA) ENSMUSG00000048327" source="2826" target="2992" cy:directed="1"/>
      <edge id="38465" label="mmu-miR-125b-5p (miRNA-mRNA) ENSMUSG00000048807" source="2826" target="2991" cy:directed="1"/>
      <edge id="38464" label="mmu-miR-125b-5p (miRNA-mRNA) ENSMUSG00000048583" source="2826" target="2538" cy:directed="1"/>
      <edge id="38463" label="mmu-miR-125b-5p (miRNA-mRNA) ENSMUSG00000050965" source="2826" target="2850" cy:directed="1"/>
      <edge id="38462" label="mmu-miR-125b-5p (miRNA-mRNA) ENSMUSG00000051331" source="2826" target="2682" cy:directed="1"/>
      <edge id="38461" label="mmu-miR-125b-5p (miRNA-mRNA) ENSMUSG00000049878" source="2826" target="806" cy:directed="1"/>
      <edge id="38460" label="mmu-miR-125b-5p (miRNA-mRNA) ENSMUSG00000048279" source="2826" target="2107" cy:directed="1"/>
      <edge id="38459" label="mmu-miR-125b-5p (miRNA-mRNA) ENSMUSG00000051166" source="2826" target="1057" cy:directed="1"/>
      <edge id="38458" label="mmu-miR-125b-5p (miRNA-mRNA) ENSMUSG00000047797" source="2826" target="780" cy:directed="1"/>
      <edge id="38457" label="mmu-miR-125b-5p (miRNA-mRNA) ENSMUSG00000050064" source="2826" target="807" cy:directed="1"/>
      <edge id="38456" label="mmu-miR-125b-5p (miRNA-mRNA) ENSMUSG00000048581" source="2826" target="2113" cy:directed="1"/>
      <edge id="38455" label="mmu-miR-125b-5p (miRNA-mRNA) ENSMUSG00000050592" source="2826" target="1102" cy:directed="1"/>
      <edge id="38454" label="mmu-miR-125b-5p (miRNA-mRNA) ENSMUSG00000050192" source="2826" target="2517" cy:directed="1"/>
      <edge id="38453" label="mmu-miR-125b-5p (miRNA-mRNA) ENSMUSG00000048058" source="2826" target="784" cy:directed="1"/>
      <edge id="38452" label="mmu-miR-125b-5p (miRNA-mRNA) ENSMUSG00000045896" source="2826" target="759" cy:directed="1"/>
      <edge id="38451" label="mmu-miR-125b-5p (miRNA-mRNA) ENSMUSG00000046743" source="2826" target="2990" cy:directed="1"/>
      <edge id="38450" label="mmu-miR-125b-5p (miRNA-mRNA) ENSMUSG00000050240" source="2826" target="2133" cy:directed="1"/>
      <edge id="38449" label="mmu-miR-125b-5p (miRNA-mRNA) ENSMUSG00000051236" source="2826" target="2888" cy:directed="1"/>
      <edge id="38448" label="mmu-miR-125b-5p (miRNA-mRNA) ENSMUSG00000048232" source="2826" target="2106" cy:directed="1"/>
      <edge id="38447" label="mmu-miR-125b-5p (miRNA-mRNA) ENSMUSG00000045871" source="2826" target="2062" cy:directed="1"/>
      <edge id="38446" label="mmu-miR-125b-5p (miRNA-mRNA) ENSMUSG00000042686" source="2826" target="2016" cy:directed="1"/>
      <edge id="38445" label="mmu-miR-125b-5p (miRNA-mRNA) ENSMUSG00000041444" source="2826" target="1990" cy:directed="1"/>
      <edge id="38444" label="mmu-miR-125b-5p (miRNA-mRNA) ENSMUSG00000042271" source="2826" target="2008" cy:directed="1"/>
      <edge id="38443" label="mmu-miR-125b-5p (miRNA-mRNA) ENSMUSG00000044674" source="2826" target="748" cy:directed="1"/>
      <edge id="38442" label="mmu-miR-125b-5p (miRNA-mRNA) ENSMUSG00000042155" source="2826" target="2004" cy:directed="1"/>
      <edge id="38441" label="mmu-miR-125b-5p (miRNA-mRNA) ENSMUSG00000042035" source="2826" target="716" cy:directed="1"/>
      <edge id="38440" label="mmu-miR-125b-5p (miRNA-mRNA) ENSMUSG00000042763" source="2826" target="733" cy:directed="1"/>
      <edge id="38439" label="mmu-miR-125b-5p (miRNA-mRNA) ENSMUSG00000042647" source="2826" target="1049" cy:directed="1"/>
      <edge id="38438" label="mmu-miR-125b-5p (miRNA-mRNA) ENSMUSG00000043639" source="2826" target="1051" cy:directed="1"/>
      <edge id="38437" label="mmu-miR-125b-5p (miRNA-mRNA) ENSMUSG00000041729" source="2826" target="1996" cy:directed="1"/>
      <edge id="38436" label="mmu-miR-125b-5p (miRNA-mRNA) ENSMUSG00000044150" source="2826" target="2039" cy:directed="1"/>
      <edge id="38435" label="mmu-miR-125b-5p (miRNA-mRNA) ENSMUSG00000041920" source="2826" target="2905" cy:directed="1"/>
      <edge id="38434" label="mmu-miR-125b-5p (miRNA-mRNA) ENSMUSG00000044707" source="2826" target="2048" cy:directed="1"/>
      <edge id="38433" label="mmu-miR-125b-5p (miRNA-mRNA) ENSMUSG00000041220" source="2826" target="2899" cy:directed="1"/>
      <edge id="38432" label="mmu-miR-125b-5p (miRNA-mRNA) ENSMUSG00000043496" source="2826" target="2884" cy:directed="1"/>
      <edge id="38431" label="mmu-miR-125b-5p (miRNA-mRNA) ENSMUSG00000041945" source="2826" target="2001" cy:directed="1"/>
      <edge id="38430" label="mmu-miR-125b-5p (miRNA-mRNA) ENSMUSG00000039270" source="2826" target="669" cy:directed="1"/>
      <edge id="38429" label="mmu-miR-125b-5p (miRNA-mRNA) ENSMUSG00000039967" source="2826" target="1957" cy:directed="1"/>
      <edge id="38428" label="mmu-miR-125b-5p (miRNA-mRNA) ENSMUSG00000039157" source="2826" target="1933" cy:directed="1"/>
      <edge id="38427" label="mmu-miR-125b-5p (miRNA-mRNA) ENSMUSG00000039384" source="2826" target="1943" cy:directed="1"/>
      <edge id="38426" label="mmu-miR-125b-5p (miRNA-mRNA) ENSMUSG00000039114" source="2826" target="1931" cy:directed="1"/>
      <edge id="38425" label="mmu-miR-125b-5p (miRNA-mRNA) ENSMUSG00000039952" source="2826" target="1956" cy:directed="1"/>
      <edge id="38424" label="mmu-miR-125b-5p (miRNA-mRNA) ENSMUSG00000040687" source="2826" target="2652" cy:directed="1"/>
      <edge id="38423" label="mmu-miR-125b-5p (miRNA-mRNA) ENSMUSG00000039943" source="2826" target="1955" cy:directed="1"/>
      <edge id="38422" label="mmu-miR-125b-5p (miRNA-mRNA) ENSMUSG00000040351" source="2826" target="684" cy:directed="1"/>
      <edge id="38421" label="mmu-miR-125b-5p (miRNA-mRNA) ENSMUSG00000040699" source="2826" target="2989" cy:directed="1"/>
      <edge id="38420" label="mmu-miR-125b-5p (miRNA-mRNA) ENSMUSG00000039809" source="2826" target="675" cy:directed="1"/>
      <edge id="38419" label="mmu-miR-125b-5p (miRNA-mRNA) ENSMUSG00000039428" source="2826" target="2669" cy:directed="1"/>
      <edge id="38418" label="mmu-miR-125b-5p (miRNA-mRNA) ENSMUSG00000038843" source="2826" target="1094" cy:directed="1"/>
      <edge id="38417" label="mmu-miR-125b-5p (miRNA-mRNA) ENSMUSG00000038248" source="2826" target="2924" cy:directed="1"/>
      <edge id="38416" label="mmu-miR-125b-5p (miRNA-mRNA) ENSMUSG00000037568" source="2826" target="1890" cy:directed="1"/>
      <edge id="38415" label="mmu-miR-125b-5p (miRNA-mRNA) ENSMUSG00000037712" source="2826" target="636" cy:directed="1"/>
      <edge id="38414" label="mmu-miR-125b-5p (miRNA-mRNA) ENSMUSG00000038280" source="2826" target="2661" cy:directed="1"/>
      <edge id="38413" label="mmu-miR-125b-5p (miRNA-mRNA) ENSMUSG00000037239" source="2826" target="2988" cy:directed="1"/>
      <edge id="38412" label="mmu-miR-125b-5p (miRNA-mRNA) ENSMUSG00000036932" source="2826" target="1880" cy:directed="1"/>
      <edge id="38411" label="mmu-miR-125b-5p (miRNA-mRNA) ENSMUSG00000037852" source="2826" target="639" cy:directed="1"/>
      <edge id="38410" label="mmu-miR-125b-5p (miRNA-mRNA) ENSMUSG00000036918" source="2826" target="2673" cy:directed="1"/>
      <edge id="38409" label="mmu-miR-125b-5p (miRNA-mRNA) ENSMUSG00000038486" source="2826" target="1912" cy:directed="1"/>
      <edge id="38408" label="mmu-miR-125b-5p (miRNA-mRNA) ENSMUSG00000036902" source="2826" target="2987" cy:directed="1"/>
      <edge id="38407" label="mmu-miR-125b-5p (miRNA-mRNA) ENSMUSG00000038121" source="2826" target="2875" cy:directed="1"/>
      <edge id="38406" label="mmu-miR-125b-5p (miRNA-mRNA) ENSMUSG00000037936" source="2826" target="1093" cy:directed="1"/>
      <edge id="38405" label="mmu-miR-125b-5p (miRNA-mRNA) ENSMUSG00000037621" source="2826" target="630" cy:directed="1"/>
      <edge id="38404" label="mmu-miR-125b-5p (miRNA-mRNA) ENSMUSG00000037235" source="2826" target="619" cy:directed="1"/>
      <edge id="38403" label="mmu-miR-125b-5p (miRNA-mRNA) ENSMUSG00000033952" source="2826" target="570" cy:directed="1"/>
      <edge id="38402" label="mmu-miR-125b-5p (miRNA-mRNA) ENSMUSG00000036036" source="2826" target="603" cy:directed="1"/>
      <edge id="38401" label="mmu-miR-125b-5p (miRNA-mRNA) ENSMUSG00000034640" source="2826" target="2907" cy:directed="1"/>
      <edge id="38400" label="mmu-miR-125b-5p (miRNA-mRNA) ENSMUSG00000034401" source="2826" target="1126" cy:directed="1"/>
      <edge id="38399" label="mmu-miR-125b-5p (miRNA-mRNA) ENSMUSG00000035900" source="2826" target="601" cy:directed="1"/>
      <edge id="38398" label="mmu-miR-125b-5p (miRNA-mRNA) ENSMUSG00000034413" source="2826" target="576" cy:directed="1"/>
      <edge id="38397" label="mmu-miR-125b-5p (miRNA-mRNA) ENSMUSG00000035164" source="2826" target="588" cy:directed="1"/>
      <edge id="38396" label="mmu-miR-125b-5p (miRNA-mRNA) ENSMUSG00000034781" source="2826" target="583" cy:directed="1"/>
      <edge id="38395" label="mmu-miR-125b-5p (miRNA-mRNA) ENSMUSG00000035158" source="2826" target="99" cy:directed="1"/>
      <edge id="38394" label="mmu-miR-125b-5p (miRNA-mRNA) ENSMUSG00000034220" source="2826" target="2986" cy:directed="1"/>
      <edge id="38393" label="mmu-miR-125b-5p (miRNA-mRNA) ENSMUSG00000032855" source="2826" target="1784" cy:directed="1"/>
      <edge id="38392" label="mmu-miR-125b-5p (miRNA-mRNA) ENSMUSG00000032186" source="2826" target="1756" cy:directed="1"/>
      <edge id="38391" label="mmu-miR-125b-5p (miRNA-mRNA) ENSMUSG00000032181" source="2826" target="2562" cy:directed="1"/>
      <edge id="38390" label="mmu-miR-125b-5p (miRNA-mRNA) ENSMUSG00000032531" source="2826" target="539" cy:directed="1"/>
      <edge id="38389" label="mmu-miR-125b-5p (miRNA-mRNA) ENSMUSG00000033871" source="2826" target="568" cy:directed="1"/>
      <edge id="38388" label="mmu-miR-125b-5p (miRNA-mRNA) ENSMUSG00000032754" source="2826" target="545" cy:directed="1"/>
      <edge id="38387" label="mmu-miR-125b-5p (miRNA-mRNA) ENSMUSG00000033684" source="2826" target="1807" cy:directed="1"/>
      <edge id="38386" label="mmu-miR-125b-5p (miRNA-mRNA) ENSMUSG00000032411" source="2826" target="535" cy:directed="1"/>
      <edge id="38385" label="mmu-miR-125b-5p (miRNA-mRNA) ENSMUSG00000033705" source="2826" target="565" cy:directed="1"/>
      <edge id="38384" label="mmu-miR-125b-5p (miRNA-mRNA) ENSMUSG00000033717" source="2826" target="566" cy:directed="1"/>
      <edge id="38383" label="mmu-miR-125b-5p (miRNA-mRNA) ENSMUSG00000032294" source="2826" target="529" cy:directed="1"/>
      <edge id="38382" label="mmu-miR-125b-5p (miRNA-mRNA) ENSMUSG00000032373" source="2826" target="534" cy:directed="1"/>
      <edge id="38381" label="mmu-miR-125b-5p (miRNA-mRNA) ENSMUSG00000032902" source="2826" target="1787" cy:directed="1"/>
      <edge id="38380" label="mmu-miR-125b-5p (miRNA-mRNA) ENSMUSG00000033453" source="2826" target="1798" cy:directed="1"/>
      <edge id="38379" label="mmu-miR-125b-5p (miRNA-mRNA) ENSMUSG00000033149" source="2826" target="2985" cy:directed="1"/>
      <edge id="38378" label="mmu-miR-125b-5p (miRNA-mRNA) ENSMUSG00000033416" source="2826" target="2846" cy:directed="1"/>
      <edge id="38377" label="mmu-miR-125b-5p (miRNA-mRNA) ENSMUSG00000032374" source="2826" target="2984" cy:directed="1"/>
      <edge id="38376" label="mmu-miR-125b-5p (miRNA-mRNA) ENSMUSG00000033545" source="2826" target="1799" cy:directed="1"/>
      <edge id="38375" label="mmu-miR-125b-5p (miRNA-mRNA) ENSMUSG00000033105" source="2826" target="554" cy:directed="1"/>
      <edge id="38374" label="mmu-miR-125b-5p (miRNA-mRNA) ENSMUSG00000032549" source="2826" target="1776" cy:directed="1"/>
      <edge id="38373" label="mmu-miR-125b-5p (miRNA-mRNA) ENSMUSG00000032245" source="2826" target="528" cy:directed="1"/>
      <edge id="38372" label="mmu-miR-125b-5p (miRNA-mRNA) ENSMUSG00000032238" source="2826" target="527" cy:directed="1"/>
      <edge id="38371" label="mmu-miR-125b-5p (miRNA-mRNA) ENSMUSG00000031284" source="2826" target="1705" cy:directed="1"/>
      <edge id="38370" label="mmu-miR-125b-5p (miRNA-mRNA) ENSMUSG00000031647" source="2826" target="513" cy:directed="1"/>
      <edge id="38369" label="mmu-miR-125b-5p (miRNA-mRNA) ENSMUSG00000031532" source="2826" target="1720" cy:directed="1"/>
      <edge id="38368" label="mmu-miR-125b-5p (miRNA-mRNA) ENSMUSG00000031227" source="2826" target="2501" cy:directed="1"/>
      <edge id="38367" label="mmu-miR-125b-5p (miRNA-mRNA) ENSMUSG00000030145" source="2826" target="1675" cy:directed="1"/>
      <edge id="38366" label="mmu-miR-125b-5p (miRNA-mRNA) ENSMUSG00000031378" source="2826" target="1713" cy:directed="1"/>
      <edge id="38365" label="mmu-miR-125b-5p (miRNA-mRNA) ENSMUSG00000030161" source="2826" target="2983" cy:directed="1"/>
      <edge id="38364" label="mmu-miR-125b-5p (miRNA-mRNA) ENSMUSG00000031903" source="2826" target="520" cy:directed="1"/>
      <edge id="38363" label="mmu-miR-125b-5p (miRNA-mRNA) ENSMUSG00000031004" source="2826" target="494" cy:directed="1"/>
      <edge id="38362" label="mmu-miR-125b-5p (miRNA-mRNA) ENSMUSG00000030428" source="2826" target="2951" cy:directed="1"/>
      <edge id="38361" label="mmu-miR-125b-5p (miRNA-mRNA) ENSMUSG00000031824" source="2826" target="2920" cy:directed="1"/>
      <edge id="38360" label="mmu-miR-125b-5p (miRNA-mRNA) ENSMUSG00000031502" source="2826" target="2952" cy:directed="1"/>
      <edge id="38359" label="mmu-miR-125b-5p (miRNA-mRNA) ENSMUSG00000031129" source="2826" target="1700" cy:directed="1"/>
      <edge id="38358" label="mmu-miR-125b-5p (miRNA-mRNA) ENSMUSG00000030102" source="2826" target="1674" cy:directed="1"/>
      <edge id="38357" label="mmu-miR-125b-5p (miRNA-mRNA) ENSMUSG00000032035" source="2826" target="109" cy:directed="1"/>
      <edge id="38356" label="mmu-miR-125b-5p (miRNA-mRNA) ENSMUSG00000031668" source="2826" target="515" cy:directed="1"/>
      <edge id="38355" label="mmu-miR-125b-5p (miRNA-mRNA) ENSMUSG00000031327" source="2826" target="1708" cy:directed="1"/>
      <edge id="38354" label="mmu-miR-125b-5p (miRNA-mRNA) ENSMUSG00000031539" source="2826" target="1721" cy:directed="1"/>
      <edge id="38353" label="mmu-miR-125b-5p (miRNA-mRNA) ENSMUSG00000031951" source="2826" target="522" cy:directed="1"/>
      <edge id="38352" label="mmu-miR-125b-5p (miRNA-mRNA) ENSMUSG00000030207" source="2826" target="2867" cy:directed="1"/>
      <edge id="38351" label="mmu-miR-125b-5p (miRNA-mRNA) ENSMUSG00000031482" source="2826" target="2982" cy:directed="1"/>
      <edge id="38350" label="mmu-miR-125b-5p (miRNA-mRNA) ENSMUSG00000030110" source="2826" target="482" cy:directed="1"/>
      <edge id="38349" label="mmu-miR-125b-5p (miRNA-mRNA) ENSMUSG00000029392" source="2826" target="2981" cy:directed="1"/>
      <edge id="38348" label="mmu-miR-125b-5p (miRNA-mRNA) ENSMUSG00000028698" source="2826" target="2950" cy:directed="1"/>
      <edge id="38347" label="mmu-miR-125b-5p (miRNA-mRNA) ENSMUSG00000029669" source="2826" target="2980" cy:directed="1"/>
      <edge id="38346" label="mmu-miR-125b-5p (miRNA-mRNA) ENSMUSG00000028649" source="2826" target="1620" cy:directed="1"/>
      <edge id="38345" label="mmu-miR-125b-5p (miRNA-mRNA) ENSMUSG00000029287" source="2826" target="1119" cy:directed="1"/>
      <edge id="38344" label="mmu-miR-125b-5p (miRNA-mRNA) ENSMUSG00000029772" source="2826" target="474" cy:directed="1"/>
      <edge id="38343" label="mmu-miR-125b-5p (miRNA-mRNA) ENSMUSG00000028289" source="2826" target="434" cy:directed="1"/>
      <edge id="38342" label="mmu-miR-125b-5p (miRNA-mRNA) ENSMUSG00000028557" source="2826" target="443" cy:directed="1"/>
      <edge id="38341" label="mmu-miR-125b-5p (miRNA-mRNA) ENSMUSG00000028631" source="2826" target="1618" cy:directed="1"/>
      <edge id="38340" label="mmu-miR-125b-5p (miRNA-mRNA) ENSMUSG00000029033" source="2826" target="2979" cy:directed="1"/>
      <edge id="38339" label="mmu-miR-125b-5p (miRNA-mRNA) ENSMUSG00000030088" source="2826" target="2953" cy:directed="1"/>
      <edge id="38338" label="mmu-miR-125b-5p (miRNA-mRNA) ENSMUSG00000028438" source="2826" target="438" cy:directed="1"/>
      <edge id="38337" label="mmu-miR-125b-5p (miRNA-mRNA) ENSMUSG00000029545" source="2826" target="1655" cy:directed="1"/>
      <edge id="38336" label="mmu-miR-125b-5p (miRNA-mRNA) ENSMUSG00000029455" source="2826" target="2978" cy:directed="1"/>
      <edge id="38335" label="mmu-miR-125b-5p (miRNA-mRNA) ENSMUSG00000028518" source="2826" target="1612" cy:directed="1"/>
      <edge id="38334" label="mmu-miR-125b-5p (miRNA-mRNA) ENSMUSG00000029161" source="2826" target="462" cy:directed="1"/>
      <edge id="38333" label="mmu-miR-125b-5p (miRNA-mRNA) ENSMUSG00000026509" source="2826" target="389" cy:directed="1"/>
      <edge id="38332" label="mmu-miR-125b-5p (miRNA-mRNA) ENSMUSG00000026622" source="2826" target="2977" cy:directed="1"/>
      <edge id="38331" label="mmu-miR-125b-5p (miRNA-mRNA) ENSMUSG00000027350" source="2826" target="1562" cy:directed="1"/>
      <edge id="38330" label="mmu-miR-125b-5p (miRNA-mRNA) ENSMUSG00000026494" source="2826" target="1530" cy:directed="1"/>
      <edge id="38329" label="mmu-miR-125b-5p (miRNA-mRNA) ENSMUSG00000026782" source="2826" target="396" cy:directed="1"/>
      <edge id="38328" label="mmu-miR-125b-5p (miRNA-mRNA) ENSMUSG00000028108" source="2826" target="2606" cy:directed="1"/>
      <edge id="38327" label="mmu-miR-125b-5p (miRNA-mRNA) ENSMUSG00000026604" source="2826" target="392" cy:directed="1"/>
      <edge id="38326" label="mmu-miR-125b-5p (miRNA-mRNA) ENSMUSG00000026879" source="2826" target="398" cy:directed="1"/>
      <edge id="38325" label="mmu-miR-125b-5p (miRNA-mRNA) ENSMUSG00000026605" source="2826" target="393" cy:directed="1"/>
      <edge id="38324" label="mmu-miR-125b-5p (miRNA-mRNA) ENSMUSG00000027006" source="2826" target="404" cy:directed="1"/>
      <edge id="38323" label="mmu-miR-125b-5p (miRNA-mRNA) ENSMUSG00000027254" source="2826" target="1024" cy:directed="1"/>
      <edge id="38322" label="mmu-miR-125b-5p (miRNA-mRNA) ENSMUSG00000027715" source="2826" target="420" cy:directed="1"/>
      <edge id="38321" label="mmu-miR-125b-5p (miRNA-mRNA) ENSMUSG00000027883" source="2826" target="424" cy:directed="1"/>
      <edge id="38320" label="mmu-miR-125b-5p (miRNA-mRNA) ENSMUSG00000026796" source="2826" target="2976" cy:directed="1"/>
      <edge id="38319" label="mmu-miR-125b-5p (miRNA-mRNA) ENSMUSG00000028211" source="2826" target="432" cy:directed="1"/>
      <edge id="38318" label="mmu-miR-125b-5p (miRNA-mRNA) ENSMUSG00000027947" source="2826" target="2542" cy:directed="1"/>
      <edge id="38317" label="mmu-miR-125b-5p (miRNA-mRNA) ENSMUSG00000025959" source="2826" target="374" cy:directed="1"/>
      <edge id="38316" label="mmu-miR-125b-5p (miRNA-mRNA) ENSMUSG00000024873" source="2826" target="1447" cy:directed="1"/>
      <edge id="38315" label="mmu-miR-125b-5p (miRNA-mRNA) ENSMUSG00000025151" source="2826" target="1464" cy:directed="1"/>
      <edge id="38314" label="mmu-miR-125b-5p (miRNA-mRNA) ENSMUSG00000026193" source="2826" target="2942" cy:directed="1"/>
      <edge id="38313" label="mmu-miR-125b-5p (miRNA-mRNA) ENSMUSG00000025198" source="2826" target="1469" cy:directed="1"/>
      <edge id="38312" label="mmu-miR-125b-5p (miRNA-mRNA) ENSMUSG00000024665" source="2826" target="1438" cy:directed="1"/>
      <edge id="38311" label="mmu-miR-125b-5p (miRNA-mRNA) ENSMUSG00000026103" source="2826" target="379" cy:directed="1"/>
      <edge id="38310" label="mmu-miR-125b-5p (miRNA-mRNA) ENSMUSG00000026447" source="2826" target="1525" cy:directed="1"/>
      <edge id="38309" label="mmu-miR-125b-5p (miRNA-mRNA) ENSMUSG00000025584" source="2826" target="367" cy:directed="1"/>
      <edge id="38308" label="mmu-miR-125b-5p (miRNA-mRNA) ENSMUSG00000024978" source="2826" target="349" cy:directed="1"/>
      <edge id="38307" label="mmu-miR-125b-5p (miRNA-mRNA) ENSMUSG00000026437" source="2826" target="2865" cy:directed="1"/>
      <edge id="38306" label="mmu-miR-125b-5p (miRNA-mRNA) ENSMUSG00000026430" source="2826" target="384" cy:directed="1"/>
      <edge id="38305" label="mmu-miR-125b-5p (miRNA-mRNA) ENSMUSG00000025140" source="2826" target="1462" cy:directed="1"/>
      <edge id="38304" label="mmu-miR-125b-5p (miRNA-mRNA) ENSMUSG00000024818" source="2826" target="1444" cy:directed="1"/>
      <edge id="38303" label="mmu-miR-125b-5p (miRNA-mRNA) ENSMUSG00000025582" source="2826" target="1488" cy:directed="1"/>
      <edge id="38302" label="mmu-miR-125b-5p (miRNA-mRNA) ENSMUSG00000026072" source="2826" target="377" cy:directed="1"/>
      <edge id="38301" label="mmu-miR-125b-5p (miRNA-mRNA) ENSMUSG00000026458" source="2826" target="1526" cy:directed="1"/>
      <edge id="38300" label="mmu-miR-125b-5p (miRNA-mRNA) ENSMUSG00000024654" source="2826" target="2975" cy:directed="1"/>
      <edge id="38299" label="mmu-miR-125b-5p (miRNA-mRNA) ENSMUSG00000025085" source="2826" target="1460" cy:directed="1"/>
      <edge id="38298" label="mmu-miR-125b-5p (miRNA-mRNA) ENSMUSG00000025352" source="2826" target="360" cy:directed="1"/>
      <edge id="38297" label="mmu-miR-125b-5p (miRNA-mRNA) ENSMUSG00000025780" source="2826" target="370" cy:directed="1"/>
      <edge id="38296" label="mmu-miR-125b-5p (miRNA-mRNA) ENSMUSG00000024897" source="2826" target="346" cy:directed="1"/>
      <edge id="38295" label="mmu-miR-125b-5p (miRNA-mRNA) ENSMUSG00000025867" source="2826" target="1497" cy:directed="1"/>
      <edge id="38294" label="mmu-miR-125b-5p (miRNA-mRNA) ENSMUSG00000026380" source="2826" target="1519" cy:directed="1"/>
      <edge id="38293" label="mmu-miR-125b-5p (miRNA-mRNA) ENSMUSG00000025790" source="2826" target="1496" cy:directed="1"/>
      <edge id="38292" label="mmu-miR-125b-5p (miRNA-mRNA) ENSMUSG00000022551" source="2826" target="1368" cy:directed="1"/>
      <edge id="38291" label="mmu-miR-125b-5p (miRNA-mRNA) ENSMUSG00000022519" source="2826" target="287" cy:directed="1"/>
      <edge id="38290" label="mmu-miR-125b-5p (miRNA-mRNA) ENSMUSG00000022707" source="2826" target="1379" cy:directed="1"/>
      <edge id="38289" label="mmu-miR-125b-5p (miRNA-mRNA) ENSMUSG00000022883" source="2826" target="300" cy:directed="1"/>
      <edge id="38288" label="mmu-miR-125b-5p (miRNA-mRNA) ENSMUSG00000022619" source="2826" target="1375" cy:directed="1"/>
      <edge id="38287" label="mmu-miR-125b-5p (miRNA-mRNA) ENSMUSG00000024066" source="2826" target="1412" cy:directed="1"/>
      <edge id="38286" label="mmu-miR-125b-5p (miRNA-mRNA) ENSMUSG00000023092" source="2826" target="1393" cy:directed="1"/>
      <edge id="38285" label="mmu-miR-125b-5p (miRNA-mRNA) ENSMUSG00000024411" source="2826" target="1424" cy:directed="1"/>
      <edge id="38284" label="mmu-miR-125b-5p (miRNA-mRNA) ENSMUSG00000023495" source="2826" target="1399" cy:directed="1"/>
      <edge id="38283" label="mmu-miR-125b-5p (miRNA-mRNA) ENSMUSG00000022419" source="2826" target="2852" cy:directed="1"/>
      <edge id="38282" label="mmu-miR-125b-5p (miRNA-mRNA) ENSMUSG00000022587" source="2826" target="1372" cy:directed="1"/>
      <edge id="38281" label="mmu-miR-125b-5p (miRNA-mRNA) ENSMUSG00000023036" source="2826" target="2864" cy:directed="1"/>
      <edge id="38280" label="mmu-miR-125b-5p (miRNA-mRNA) ENSMUSG00000024548" source="2826" target="333" cy:directed="1"/>
      <edge id="38279" label="mmu-miR-125b-5p (miRNA-mRNA) ENSMUSG00000022656" source="2826" target="1377" cy:directed="1"/>
      <edge id="38278" label="mmu-miR-125b-5p (miRNA-mRNA) ENSMUSG00000023019" source="2826" target="2939" cy:directed="1"/>
      <edge id="38277" label="mmu-miR-125b-5p (miRNA-mRNA) ENSMUSG00000024590" source="2826" target="336" cy:directed="1"/>
      <edge id="38276" label="mmu-miR-125b-5p (miRNA-mRNA) ENSMUSG00000022742" source="2826" target="294" cy:directed="1"/>
      <edge id="38275" label="mmu-miR-125b-5p (miRNA-mRNA) ENSMUSG00000022621" source="2826" target="1376" cy:directed="1"/>
      <edge id="38274" label="mmu-miR-125b-5p (miRNA-mRNA) ENSMUSG00000024063" source="2826" target="1411" cy:directed="1"/>
      <edge id="38273" label="mmu-miR-125b-5p (miRNA-mRNA) ENSMUSG00000021701" source="2826" target="264" cy:directed="1"/>
      <edge id="38272" label="mmu-miR-125b-5p (miRNA-mRNA) ENSMUSG00000022244" source="2826" target="2863" cy:directed="1"/>
      <edge id="38271" label="mmu-miR-125b-5p (miRNA-mRNA) ENSMUSG00000021733" source="2826" target="1337" cy:directed="1"/>
      <edge id="38270" label="mmu-miR-125b-5p (miRNA-mRNA) ENSMUSG00000021608" source="2826" target="1330" cy:directed="1"/>
      <edge id="38269" label="mmu-miR-125b-5p (miRNA-mRNA) ENSMUSG00000021364" source="2826" target="1324" cy:directed="1"/>
      <edge id="38268" label="mmu-miR-125b-5p (miRNA-mRNA) ENSMUSG00000021175" source="2826" target="1316" cy:directed="1"/>
      <edge id="38267" label="mmu-miR-125b-5p (miRNA-mRNA) ENSMUSG00000021928" source="2826" target="1344" cy:directed="1"/>
      <edge id="38266" label="mmu-miR-125b-5p (miRNA-mRNA) ENSMUSG00000022364" source="2826" target="286" cy:directed="1"/>
      <edge id="38265" label="mmu-miR-125b-5p (miRNA-mRNA) ENSMUSG00000022324" source="2826" target="285" cy:directed="1"/>
      <edge id="38264" label="mmu-miR-125b-5p (miRNA-mRNA) ENSMUSG00000021838" source="2826" target="1341" cy:directed="1"/>
      <edge id="38263" label="mmu-miR-125b-5p (miRNA-mRNA) ENSMUSG00000022383" source="2826" target="76" cy:directed="1"/>
      <edge id="38262" label="mmu-miR-125b-5p (miRNA-mRNA) ENSMUSG00000022265" source="2826" target="284" cy:directed="1"/>
      <edge id="38261" label="mmu-miR-125b-5p (miRNA-mRNA) ENSMUSG00000022043" source="2826" target="2895" cy:directed="1"/>
      <edge id="38260" label="mmu-miR-125b-5p (miRNA-mRNA) ENSMUSG00000022358" source="2826" target="2845" cy:directed="1"/>
      <edge id="38259" label="mmu-miR-125b-5p (miRNA-mRNA) ENSMUSG00000022178" source="2826" target="278" cy:directed="1"/>
      <edge id="38258" label="mmu-miR-125b-5p (miRNA-mRNA) ENSMUSG00000021061" source="2826" target="1314" cy:directed="1"/>
      <edge id="38257" label="mmu-miR-125b-5p (miRNA-mRNA) ENSMUSG00000020886" source="2826" target="2488" cy:directed="1"/>
      <edge id="38256" label="mmu-miR-125b-5p (miRNA-mRNA) ENSMUSG00000018199" source="2826" target="2858" cy:directed="1"/>
      <edge id="38255" label="mmu-miR-125b-5p (miRNA-mRNA) ENSMUSG00000020534" source="2826" target="1297" cy:directed="1"/>
      <edge id="38254" label="mmu-miR-125b-5p (miRNA-mRNA) ENSMUSG00000020572" source="2826" target="1298" cy:directed="1"/>
      <edge id="38253" label="mmu-miR-125b-5p (miRNA-mRNA) ENSMUSG00000020889" source="2826" target="85" cy:directed="1"/>
      <edge id="38252" label="mmu-miR-125b-5p (miRNA-mRNA) ENSMUSG00000018899" source="2826" target="86" cy:directed="1"/>
      <edge id="38251" label="mmu-miR-125b-5p (miRNA-mRNA) ENSMUSG00000020387" source="2826" target="232" cy:directed="1"/>
      <edge id="38250" label="mmu-miR-125b-5p (miRNA-mRNA) ENSMUSG00000020472" source="2826" target="1296" cy:directed="1"/>
      <edge id="38249" label="mmu-miR-125b-5p (miRNA-mRNA) ENSMUSG00000020101" source="2826" target="2974" cy:directed="1"/>
      <edge id="38248" label="mmu-miR-125b-5p (miRNA-mRNA) ENSMUSG00000018411" source="2826" target="1246" cy:directed="1"/>
      <edge id="38247" label="mmu-miR-125b-5p (miRNA-mRNA) ENSMUSG00000020092" source="2826" target="1277" cy:directed="1"/>
      <edge id="38246" label="mmu-miR-125b-5p (miRNA-mRNA) ENSMUSG00000020423" source="2826" target="1290" cy:directed="1"/>
      <edge id="38245" label="mmu-miR-125b-5p (miRNA-mRNA) ENSMUSG00000020455" source="2826" target="96" cy:directed="1"/>
      <edge id="38244" label="mmu-miR-125b-5p (miRNA-mRNA) ENSMUSG00000018983" source="2826" target="208" cy:directed="1"/>
      <edge id="38243" label="mmu-miR-125b-5p (miRNA-mRNA) ENSMUSG00000018909" source="2826" target="107" cy:directed="1"/>
      <edge id="38242" label="mmu-miR-125b-5p (miRNA-mRNA) ENSMUSG00000020882" source="2826" target="2973" cy:directed="1"/>
      <edge id="38241" label="mmu-miR-125b-5p (miRNA-mRNA) ENSMUSG00000019564" source="2826" target="212" cy:directed="1"/>
      <edge id="38240" label="mmu-miR-125b-5p (miRNA-mRNA) ENSMUSG00000017639" source="2826" target="197" cy:directed="1"/>
      <edge id="38239" label="mmu-miR-125b-5p (miRNA-mRNA) ENSMUSG00000015829" source="2826" target="185" cy:directed="1"/>
      <edge id="38238" label="mmu-miR-125b-5p (miRNA-mRNA) ENSMUSG00000015846" source="2826" target="74" cy:directed="1"/>
      <edge id="38237" label="mmu-miR-125b-5p (miRNA-mRNA) ENSMUSG00000016534" source="2826" target="1235" cy:directed="1"/>
      <edge id="38236" label="mmu-miR-125b-5p (miRNA-mRNA) ENSMUSG00000008540" source="2826" target="1203" cy:directed="1"/>
      <edge id="38235" label="mmu-miR-125b-5p (miRNA-mRNA) ENSMUSG00000006273" source="2826" target="2972" cy:directed="1"/>
      <edge id="38234" label="mmu-miR-125b-5p (miRNA-mRNA) ENSMUSG00000014361" source="2826" target="177" cy:directed="1"/>
      <edge id="38233" label="mmu-miR-125b-5p (miRNA-mRNA) ENSMUSG00000014602" source="2826" target="178" cy:directed="1"/>
      <edge id="38232" label="mmu-miR-125b-5p (miRNA-mRNA) ENSMUSG00000006731" source="2826" target="159" cy:directed="1"/>
      <edge id="38231" label="mmu-miR-125b-5p (miRNA-mRNA) ENSMUSG00000011589" source="2826" target="1216" cy:directed="1"/>
      <edge id="38230" label="mmu-miR-125b-5p (miRNA-mRNA) ENSMUSG00000013076" source="2826" target="2844" cy:directed="1"/>
      <edge id="38229" label="mmu-miR-125b-5p (miRNA-mRNA) ENSMUSG00000015599" source="2826" target="2971" cy:directed="1"/>
      <edge id="38228" label="mmu-miR-125b-5p (miRNA-mRNA) ENSMUSG00000017446" source="2826" target="195" cy:directed="1"/>
      <edge id="38227" label="mmu-miR-125b-5p (miRNA-mRNA) ENSMUSG00000006586" source="2826" target="1196" cy:directed="1"/>
      <edge id="38226" label="mmu-miR-125b-5p (miRNA-mRNA) ENSMUSG00000013846" source="2826" target="174" cy:directed="1"/>
      <edge id="38225" label="mmu-miR-125b-5p (miRNA-mRNA) ENSMUSG00000009394" source="2826" target="2933" cy:directed="1"/>
      <edge id="38224" label="mmu-miR-125b-5p (miRNA-mRNA) ENSMUSG00000008461" source="2826" target="1202" cy:directed="1"/>
      <edge id="38223" label="mmu-miR-125b-5p (miRNA-mRNA) ENSMUSG00000003134" source="2826" target="131" cy:directed="1"/>
      <edge id="38222" label="mmu-miR-125b-5p (miRNA-mRNA) ENSMUSG00000000673" source="2826" target="1137" cy:directed="1"/>
      <edge id="38221" label="mmu-miR-125b-5p (miRNA-mRNA) ENSMUSG00000000555" source="2826" target="119" cy:directed="1"/>
      <edge id="38220" label="mmu-miR-125b-5p (miRNA-mRNA) ENSMUSG00000002107" source="2826" target="1161" cy:directed="1"/>
[truncated: 4,466,548 more chars]
