# Supplementary material for: Regulatory network analysis of Paneth cell and goblet cell enriched gut organoids using transcriptomics approaches
Source: Royal Society of Chemistry journal article supplement (doi:10.1039/c9mo00130a), 2019-12-10
Supplement: c9mo00130a1.cys [file c9mo00130a1.cys › CytoscapeSession-2019_09_26-22_01/properties/groupSettings.props]

#Written by: Cytoscape's PropertiesWriterImpl
#Thu Sep 26 22:01:08 BST 2019
defaultDoubleListAggregation=Average
groupViewType=Compound Node
aggregationEnabled=false
defaultIntegerListAggregation=Average
defaultStringAggregation=Comma-separated Values
defaultLongAggregation=None
doubleClickAction=Expand/Contract
defaultFloatAggregation=Average
overrideColumnAggregations=
defaultIntegerAggregation=Average
defaultLongListAggregation=Average
defaultListAggregation=Unique Values
defaultDoubleAggregation=Average
defaultStringListAggregation=Unique Values
defaultBooleanAggregation=None
useNestedNetworks=false
