# Supplementary material for: Regulatory network analysis of Paneth cell and goblet cell enriched gut organoids using transcriptomics approaches
Source: Royal Society of Chemistry journal article supplement (doi:10.1039/c9mo00130a), 2019-12-10
Supplement: c9mo00130a1.cys [file c9mo00130a1.cys › CytoscapeSession-2019_09_26-22_01/tables/36-Pan_network_lfc1.txt/LOCAL_ATTRS-org.cytoscape.model.CyEdge-36+default+edge.cytable]

CyCSV-Version	1
SUID	interaction	name	selected
java.lang.Long	java.lang.String	java.lang.String	java.lang.Boolean
36 default edge
26942			false
26940			false
26938			false
26937			false
26931			false
26930			false
26927			false
26926			false
26925			false
26921			false
26920			false
26919			false
26918			false
26914			false
26913			false
26911			false
26910			false
26908			false
26907			false
26906			false
26901			false
26900			false
26899			false
26895			false
26894			false
26892			false
26889			false
26887			false
26886			false
26882			false
26881			false
26879			false
26874			false
26872			false
26871			false
26870			false
26866			false
26863			false
26862			false
26860			false
26858			false
26856			false
26851			false
26850			false
26849			false
26848			false
26846			false
26845			false
26842			false
26840			false
26839			false
26836			false
26835			false
26834			false
26823			false
26822			false
18209			false
18208			false
18207			false
18204			false
18201			false
18200			false
18199			false
18197			false
18196			false
18194			false
18192			false
18188			false
18187			false
18186			false
18185			false
18184			false
18183			false
18182			false
18181			false
18178			false
18176			false
18174			false
18169			false
18165			false
18164			false
18163			false
18162			false
18160			false
18159			false
18158			false
18151			false
18149			false
18148			false
18147			false
18142			false
18140			false
18137			false
18135			false
18134			false
18127			false
18126			false
18125			false
18124			false
18123			false
18122			false
18118			false
18117			false
18115			false
18114			false
18112			false
18109			false
18108			false
18107			false
18106			false
18105			false
18100			false
18099			false
18096			false
18094			false
18093			false
18092			false
18091			false
18090			false
18089			false
18087			false
18085			false
18083			false
18082			false
18076			false
18074			false
18073			false
18072			false
18068			false
18066			false
18065			false
18063			false
18061			false
18057			false
18056			false
18055			false
18054			false
18053			false
18051			false
18049			false
18046			false
18044			false
18043			false
18042			false
18040			false
18039			false
18038			false
18037			false
18035			false
18034			false
18033			false
18031			false
18027			false
18024			false
18022			false
18019			false
38498			false
18017			false
38496			false
18016			false
38492			false
18012			false
18011			false
18010			false
18008			false
18007			false
18006			false
38485			false
18004			false
18003			false
18002			false
18001			false
18000			false
17999			false
17998			false
17997			false
17994			false
38473			false
17993			false
17990			false
17989			false
38468			false
17987			false
17985			false
38461			false
17981			false
38460			false
17980			false
38458			false
38457			false
17977			false
38455			false
17975			false
17974			false
38453			false
38450			false
17970			false
38448			false
17968			false
38443			false
38441			false
38439			false
38438			false
38426			false
38423			false
38418			false
38409			false
38406			false
38405			false
38404			false
38398			false
38395			false
38393			false
38389			false
38388			false
38386			false
38383			false
38375			false
38373			false
38364			false
30172			false
38356			false
38346			false
38344			false
38334			false
38333			false
38329			false
38327			false
38326			false
38325			false
38324			false
38321			false
38319			false
38317			false
38312			false
38311			false
38310			false
38302			false
38297			false
38293			false
38290			false
38287			false
38275			false
38269			false
38266			false
38264			false
38250			false
38248			false
38247			false
38244			false
38243			false
38241			false
38232			false
38228			false
38226			false
38223			false
38222			false
38221			false
38217			false
38216			false
38215			false
38214			false
21224			false
21223			false
21221			false
21219			false
21218			false
21216			false
21214			false
21213			false
21211			false
21210			false
21209			false
21206			false
21205			false
21204			false
21201			false
21199			false
21197			false
21196			false
21195			false
21194			false
21187			false
21186			false
21182			false
21180			false
21177			false
21174			false
21172			false
21170			false
21169			false
8881			false
21168			false
8877			false
8876			false
21163			false
21162			false
21161			false
8873			false
21160			false
8872			false
21158			false
21157			false
8867			false
21154			false
8866			false
21153			false
21152			false
8864			false
21151			false
21150			false
21148			false
21145			false
21143			false
8855			false
21141			false
8852			false
21138			false
21137			false
8848			false
21135			false
21134			false
8846			false
21133			false
8845			false
21131			false
21130			false
8842			false
21128			false
21127			false
21126			false
8838			false
21124			false
21123			false
21122			false
8833			false
21120			false
8832			false
21119			false
8831			false
8829			false
21116			false
8828			false
21113			false
8823			false
21110			false
21109			false
21108			false
8819			false
8818			false
21105			false
21104			false
21103			false
21102			false
21101			false
21099			false
8811			false
21097			false
21095			false
8807			false
21093			false
8804			false
21091			false
8802			false
21089			false
21088			false
21086			false
21082			false
21081			false
21080			false
8792			false
21079			false
21077			false
21076			false
8787			false
21069			false
8781			false
21066			false
21065			false
8777			false
21062			false
21061			false
8773			false
21059			false
21058			false
21057			false
8768			false
8767			false
8766			false
21053			false
21049			false
8760			false
21045			false
21044			false
8756			false
21043			false
21041			false
8749			false
21036			false
8747			false
21032			false
21030			false
8741			false
21028			false
21026			false
8738			false
8737			false
21023			false
21021			false
8733			false
8728			false
8727			false
21014			false
8725			false
21009			false
8720			false
21007			false
8719			false
21005			false
21004			false
21003			false
8715			false
20999			false
20997			false
8709			false
20996			false
8708			false
20995			false
20994			false
20993			false
8705			false
20990			false
8702			false
20989			false
20988			false
8700			false
8699			false
20985			false
20984			false
8694			false
8693			false
20980			false
8691			false
8690			false
20977			false
8689			false
20976			false
8687			false
20974			false
8685			false
20972			false
20970			false
8681			false
20967			false
20966			false
20965			false
20964			false
20963			false
8674			false
20961			false
20958			false
20957			false
20954			false
8666			false
20953			false
20952			false
20951			false
20949			false
20947			false
8658			false
20943			false
8655			false
20942			false
20941			false
20940			false
8652			false
8651			false
20938			false
8649			false
20936			false
8648			false
20934			false
20933			false
20932			false
8643			false
20929			false
8641			false
20928			false
8640			false
20927			false
8639			false
20926			false
20925			false
20924			false
20923			false
20922			false
20921			false
20918			false
8630			false
8629			false
20916			false
8628			false
20915			false
8627			false
20913			false
20912			false
8621			false
20908			false
8620			false
8619			false
20906			false
8618			false
8617			false
20903			false
20899			false
8610			false
8609			false
20895			false
20894			false
29083			false
20890			false
8602			false
20888			false
20887			false
20886			false
8598			false
20884			false
20883			false
20882			false
8593			false
20880			false
8592			false
20879			false
20876			false
8587			false
20874			false
20873			false
8583			false
20870			false
20869			false
8581			false
20868			false
20862			false
8574			false
20861			false
8573			false
20859			false
20857			false
20856			false
20854			false
20853			false
20852			false
20851			false
20850			false
8560			false
20847			false
8558			false
20844			false
8556			false
12650			false
8554			false
20841			false
12649			false
8553			false
12648			false
20839			false
12647			false
20838			false
12646			false
12644			false
8548			false
20835			false
20834			false
12642			false
8546			false
20833			false
20832			false
8544			false
20831			false
20830			false
20828			false
12636			false
20827			false
12635			false
12633			false
20824			false
12631			false
8535			false
20822			false
20821			false
8533			false
8532			false
12627			false
12626			false
12625			false
20816			false
8528			false
20815			false
12623			false
8527			false
20814			false
8526			false
8525			false
20812			false
8524			false
8523			false
8522			false
12616			false
20807			false
12614			false
12612			false
12610			false
12609			false
20800			false
8512			false
20799			false
20797			false
12605			false
20796			false
8508			false
12603			false
12602			false
8506			false
20793			false
8504			false
12599			false
8502			false
20789			false
12596			false
8500			false
12595			false
20786			false
12594			false
8497			false
20783			false
8495			false
8494			false
12589			false
8493			false
20780			false
8492			false
8491			false
8490			false
20777			false
8489			false
12584			false
12583			false
12582			false
8486			false
20773			false
20771			false
12579			false
8483			false
20769			false
20768			false
12576			false
20767			false
20766			false
12574			false
12573			false
20763			false
20761			false
12569			false
8473			false
20760			false
8472			false
12567			false
12566			false
20757			false
8469			false
8468			false
12561			false
8465			false
20752			false
8464			false
12558			false
20749			false
20747			false
12555			false
8458			false
20744			false
12552			false
20742			false
8454			false
12548			false
8452			false
20739			false
20737			false
8449			false
20736			false
12544			false
20735			false
12543			false
8447			false
20734			false
20733			false
20732			false
12538			false
20729			false
20727			false
12535			false
8439			false
20726			false
20725			false
12533			false
8437			false
8436			false
20723			false
20722			false
20721			false
12529			false
8433			false
20720			false
12527			false
20718			false
12524			false
8428			false
12523			false
8427			false
20713			false
8425			false
20712			false
12520			false
8424			false
12519			false
20710			false
12518			false
8422			false
20709			false
20708			false
12516			false
8420			false
20707			false
12514			false
20705			false
20704			false
8415			false
20702			false
8414			false
20698			false
8408			false
20695			false
12503			false
8407			false
20693			false
20692			false
12498			false
8401			false
12496			false
12493			false
12491			false
12490			false
8392			false
12487			false
8391			false
12486			false
12485			false
8389			false
8388			false
8387			false
12481			false
12480			false
8384			false
8383			false
8382			false
12477			false
12476			false
12474			false
8377			false
12472			false
8373			false
12468			false
8372			false
12466			false
12465			false
8367			false
8366			false
12461			false
12453			false
12451			false
8355			false
12449			false
12448			false
12447			false
24734			false
8350			false
24732			false
12444			false
8348			false
24731			false
8347			false
24729			false
24728			false
8344			false
24727			false
12438			false
24725			false
12436			false
24723			false
12435			false
12433			false
8337			false
24720			false
12432			false
8336			false
24719			false
12431			false
24718			false
12430			false
24717			false
12429			false
8332			false
8331			false
8330			false
24712			false
8326			false
24709			false
8325			false
12420			false
24706			false
24705			false
12417			false
12416			false
8320			false
12415			false
8319			false
24702			false
12413			false
8317			false
24700			false
12412			false
24699			false
12409			false
12408			false
8312			false
24695			false
12407			false
24694			false
12406			false
24693			false
12405			false
8309			false
24692			false
12403			false
8305			false
24688			false
8304			false
24687			false
12399			false
24686			false
12398			false
8302			false
24683			false
12395			false
12394			false
8298			false
24681			false
12392			false
12391			false
8295			false
24678			false
12389			false
24676			false
8291			false
24674			false
12386			false
24672			false
12384			false
8288			false
24671			false
24670			false
12382			false
12381			false
24668			false
12380			false
24667			false
8283			false
24665			false
8281			false
12375			false
12374			false
12373			false
12372			false
8275			false
24658			false
12370			false
24657			false
12368			false
24653			false
12365			false
8268			false
24651			false
12363			false
12362			false
24649			false
12361			false
12360			false
24647			false
12358			false
12356			false
24642			false
12354			false
8258			false
24641			false
24640			false
12352			false
8256			false
24639			false
12351			false
8254			false
8252			false
24635			false
12347			false
8251			false
8249			false
12344			false
8248			false
12343			false
8247			false
24628			false
8244			false
24627			false
12339			false
24625			false
12337			false
12336			false
8240			false
24623			false
12335			false
24622			false
24621			false
12333			false
24619			false
12330			false
24617			false
8233			false
12326			false
12325			false
24612			false
12324			false
12323			false
8226			false
24608			false
8224			false
24607			false
24606			false
8221			false
12316			false
8220			false
8219			false
12314			false
24601			false
12313			false
24600			false
12309			false
24596			false
12308			false
24595			false
24594			false
12306			false
8210			false
24593			false
12305			false
8209			false
12304			false
8208			false
12303			false
8206			false
24589			false
8204			false
24587			false
8203			false
24586			false
12297			false
24584			false
24582			false
8198			false
24581			false
8197			false
24580			false
12291			false
8195			false
24578			false
12290			false
24577			false
12289			false
12288			false
8191			false
8190			false
24573			false
8189			false
8188			false
24571			false
12283			false
12282			false
12281			false
8185			false
12280			false
24567			false
12279			false
8183			false
24566			false
12278			false
24564			false
12276			false
12275			false
24562			false
8176			false
12271			false
24558			false
24554			false
8170			false
24553			false
8169			false
24552			false
12264			false
8168			false
24551			false
12263			false
24550			false
24547			false
12258			false
8162			false
24545			false
8160			false
24542			false
8158			false
12253			false
12250			false
8153			false
24535			false
24534			false
24533			false
8149			false
12244			false
12243			false
24530			false
12241			false
8145			false
24528			false
12240			false
12239			false
24526			false
12236			false
8140			false
12235			false
24522			false
8137			false
24520			false
12232			false
12231			false
8135			false
12230			false
8134			false
24517			false
12229			false
8132			false
24515			false
24513			false
12225			false
12224			false
12223			false
24510			false
8126			false
24509			false
8125			false
24508			false
24507			false
8123			false
8122			false
12217			false
8121			false
24504			false
24503			false
8119			false
24502			false
12213			false
24500			false
24499			false
24498			false
12210			false
24496			false
12208			false
8112			false
12207			false
24494			false
24492			false
12204			false
24491			false
12203			false
8107			false
24490			false
12202			false
8106			false
12201			false
24488			false
12200			false
8104			false
12199			false
8103			false
8102			false
12197			false
8101			false
24484			false
8099			false
24482			false
12194			false
24481			false
24479			false
24476			false
12187			false
8091			false
8089			false
24472			false
12184			false
24471			false
24470			false
24469			false
12181			false
24468			false
24466			false
12178			false
24464			false
12176			false
8080			false
24462			false
12173			false
8076			false
8075			false
24457			false
12169			false
12168			false
12167			false
24452			false
8068			false
24451			false
12163			false
24450			false
24449			false
8065			false
24448			false
8064			false
24447			false
12159			false
24446			false
8062			false
24445			false
12157			false
8061			false
24444			false
8060			false
12155			false
24442			false
24441			false
12152			false
12151			false
8055			false
24438			false
12150			false
12148			false
24435			false
8051			false
24434			false
8050			false
24433			false
12145			false
24432			false
8048			false
24431			false
12143			false
8047			false
24430			false
12142			false
12141			false
24428			false
12140			false
8044			false
12139			false
12138			false
24425			false
8041			false
24423			false
8037			false
12132			false
12131			false
24418			false
12129			false
8033			false
24416			false
12128			false
8032			false
24415			false
8031			false
8029			false
24412			false
12121			false
12120			false
8023			false
24406			false
24405			false
8021			false
24404			false
8020			false
12115			false
12114			false
24399			false
8014			false
24396			false
8012			false
12106			false
24393			false
12105			false
12103			false
12102			false
8006			false
12100			false
12098			false
24385			false
24384			false
24383			false
12094			false
24381			false
12093			false
24380			false
7996			false
24379			false
12089			false
12088			false
7992			false
12087			false
24372			false
7987			false
24370			false
12082			false
24369			false
12081			false
7984			false
24367			false
12079			false
24364			false
7980			false
24363			false
12071			false
24358			false
12070			false
7974			false
7972			false
24355			false
12067			false
24354			false
12066			false
7969			false
24351			false
12062			false
24349			false
12060			false
7964			false
7963			false
24346			false
7961			false
12056			false
7960			false
24343			false
24341			false
24340			false
12052			false
24339			false
12051			false
24338			false
7954			false
24337			false
12049			false
12047			false
24334			false
12046			false
24333			false
24332			false
12044			false
7948			false
24331			false
24330			false
12042			false
24329			false
24326			false
7941			false
12036			false
24323			false
12035			false
24322			false
24321			false
7937			false
12032			false
24319			false
7933			false
12027			false
7931			false
24314			false
24313			false
12024			false
24311			false
12023			false
12022			false
7926			false
12021			false
12019			false
7923			false
24306			false
12018			false
24304			false
24303			false
24302			false
7918			false
24301			false
12013			false
12012			false
7915			false
24297			false
12008			false
24295			false
7911			false
24294			false
24293			false
7909			false
12004			false
7908			false
12003			false
7907			false
12002			false
24289			false
7905			false
7904			false
7903			false
24286			false
7902			false
24285			false
11997			false
11996			false
24283			false
7899			false
11990			false
7894			false
11989			false
7891			false
7889			false
7887			false
7886			false
11981			false
7882			false
11976			false
11973			false
11972			false
11970			false
11967			false
7871			false
11966			false
7870			false
11964			false
11963			false
11959			false
11957			false
7861			false
7859			false
11954			false
11953			false
7857			false
11952			false
7855			false
11950			false
11949			false
11943			false
11941			false
11939			false
11938			false
7842			false
11937			false
7841			false
7839			false
11933			false
7837			false
7836			false
11931			false
11930			false
7834			false
11929			false
7833			false
11928			false
7829			false
7827			false
11920			false
7823			false
7821			false
11915			false
7818			false
11912			false
24197			false
24196			false
11907			false
24194			false
11906			false
24193			false
11905			false
7809			false
24192			false
24191			false
11903			false
24190			false
11902			false
7806			false
7805			false
24188			false
24187			false
24186			false
24185			false
24184			false
11896			false
11895			false
7798			false
11893			false
11892			false
7796			false
11889			false
24174			false
24173			false
11884			false
24167			false
11878			false
11877			false
11876			false
24163			false
24162			false
24161			false
7777			false
24160			false
7776			false
24159			false
7775			false
24158			false
11870			false
7773			false
24156			false
11867			false
24153			false
7769			false
24152			false
7768			false
24151			false
24150			false
24148			false
24146			false
7761			false
24144			false
7760			false
24143			false
7759			false
24142			false
11854			false
24141			false
7756			false
11850			false
24137			false
11849			false
24136			false
11848			false
7752			false
11847			false
7751			false
11846			false
11845			false
24131			false
24130			false
11842			false
7743			false
24126			false
32316			false
7740			false
24123			false
32313			false
7737			false
24120			false
11832			false
7736			false
32311			false
24119			false
11831			false
11829			false
32308			false
24116			false
32307			false
7731			false
32306			false
24114			false
11825			false
24112			false
7727			false
24110			false
32301			false
24109			false
7725			false
7724			false
24107			false
32298			false
11818			false
7721			false
32295			false
24103			false
11815			false
11814			false
7718			false
32293			false
24101			false
32292			false
7716			false
24099			false
11811			false
32290			false
24098			false
32289			false
24097			false
11809			false
7713			false
32287			false
11807			false
32286			false
11806			false
11805			false
32284			false
24091			false
24090			false
11802			false
7706			false
24089			false
11801			false
7705			false
32280			false
24088			false
11800			false
32279			false
11798			false
32277			false
11797			false
24084			false
32275			false
24083			false
32274			false
11794			false
24081			false
24080			false
24079			false
32270			false
24078			false
32269			false
11789			false
11788			false
24074			false
7690			false
7689			false
32264			false
32263			false
32262			false
11782			false
24068			false
11779			false
11778			false
32257			false
24065			false
11777			false
24064			false
11775			false
7679			false
11774			false
32253			false
24061			false
24060			false
11772			false
7676			false
7675			false
24058			false
11770			false
7674			false
32249			false
24057			false
24056			false
7672			false
32247			false
24055			false
11767			false
7671			false
11766			false
7670			false
32244			false
24052			false
32243			false
24051			false
11763			false
32242			false
24050			false
7666			false
32240			false
24047			false
11758			false
7662			false
32237			false
11757			false
24044			false
7660			false
32235			false
11755			false
7659			false
32234			false
11753			false
32232			false
32231			false
11751			false
32230			false
24038			false
11749			false
32227			false
24035			false
7651			false
32226			false
7650			false
24033			false
32224			false
24032			false
11744			false
24031			false
24030			false
11742			false
32221			false
24029			false
24028			false
11740			false
11739			false
24026			false
7642			false
11737			false
32216			false
11736			false
32215			false
24023			false
32214			false
24022			false
24021			false
11732			false
7636			false
32211			false
11730			false
7634			false
32209			false
24016			false
7631			false
32206			false
11726			false
7630			false
7629			false
7628			false
24011			false
32202			false
24009			false
11720			false
11719			false
32197			false
11717			false
7621			false
32196			false
11715			false
32194			false
7618			false
11713			false
7617			false
32192			false
11712			false
7616			false
32190			false
11710			false
7613			false
11707			false
11704			false
32183			false
11703			false
32182			false
11702			false
7605			false
32180			false
7604			false
11699			false
7603			false
32178			false
11698			false
32177			false
32176			false
11696			false
11695			false
32174			false
11694			false
32173			false
7597			false
32171			false
32170			false
11690			false
32169			false
11689			false
32168			false
7591			false
11684			false
7588			false
32163			false
11683			false
32162			false
11682			false
11681			false
7585			false
7584			false
32156			false
11674			false
7578			false
11673			false
11671			false
7574			false
32149			false
7573			false
11668			false
32147			false
7571			false
11666			false
32142			false
11662			false
7566			false
32141			false
11661			false
32140			false
7564			false
11659			false
7563			false
11658			false
11657			false
11655			false
7559			false
32134			false
11654			false
32132			false
7556			false
11651			false
7555			false
32130			false
32129			false
11649			false
7553			false
32128			false
7552			false
32127			false
11647			false
11646			false
32124			false
11644			false
32122			false
11642			false
7546			false
7545			false
7544			false
32118			false
7542			false
32116			false
7540			false
11635			false
7539			false
32111			false
32110			false
32109			false
11629			false
32108			false
11628			false
7532			false
32107			false
32105			false
11625			false
32104			false
11624			false
32103			false
7527			false
7526			false
7525			false
32100			false
32099			false
32098			false
32097			false
32096			false
32092			false
27995			false
7514			false
32089			false
27993			false
7513			false
32085			false
7509			false
32084			false
7506			false
32081			false
7505			false
7504			false
7503			false
32078			false
32075			false
7498			false
32073			false
7496			false
32071			false
7494			false
7491			false
32066			false
7490			false
32065			false
32064			false
7488			false
32061			false
7483			false
32057			false
32056			false
32051			false
32050			false
32049			false
7471			false
32045			false
32044			false
32042			false
32041			false
7463			false
32038			false
32036			false
32035			false
7458			false
32030			false
7453			false
32028			false
7452			false
7451			false
32023			false
7445			false
32020			false
7444			false
7443			false
32017			false
7441			false
32015			false
32014			false
7438			false
32013			false
7437			false
32012			false
32011			false
32008			false
32005			false
32003			false
7427			false
32002			false
7425			false
31999			false
31997			false
7421			false
31996			false
31995			false
7419			false
31993			false
7417			false
31991			false
31990			false
31989			false
31988			false
7411			false
31986			false
31985			false
7408			false
7403			false
31978			false
7401			false
31975			false
7399			false
31971			false
7391			false
31965			false
7389			false
31964			false
7387			false
31961			false
31957			false
7381			false
31956			false
31954			false
7378			false
31953			false
31952			false
31950			false
7373			false
31948			false
7372			false
31946			false
31944			false
7368			false
7367			false
7364			false
31937			false
31935			false
31929			false
31928			false
31927			false
31926			false
31923			false
31922			false
7343			false
7342			false
31917			false
7338			false
7337			false
7336			false
31911			false
7334			false
31908			false
7332			false
31907			false
7331			false
31906			false
7330			false
7329			false
7327			false
31902			false
31901			false
7324			false
31899			false
7319			false
31891			false
31890			false
7314			false
31888			false
31887			false
31886			false
31885			false
31884			false
7308			false
7307			false
31880			false
7304			false
31879			false
31878			false
7302			false
31876			false
31867			false
7290			false
7285			false
7284			false
7282			false
31856			false
31855			false
7279			false
7278			false
31853			false
31851			false
7275			false
7274			false
31847			false
31846			false
7270			false
31843			false
7262			false
31837			false
7261			false
31836			false
7260			false
31834			false
7258			false
31833			false
7257			false
7256			false
31831			false
7255			false
7254			false
31829			false
31825			false
7245			false
31820			false
31819			false
7240			false
31815			false
31814			false
7238			false
7237			false
7236			false
31811			false
7233			false
7230			false
7227			false
31800			false
31799			false
31798			false
7222			false
31797			false
31796			false
[truncated: 2,790 more rows]
