# Supplementary material for: Regulatory network analysis of Paneth cell and goblet cell enriched gut organoids using transcriptomics approaches
Source: Royal Society of Chemistry journal article supplement (doi:10.1039/c9mo00130a), 2019-12-10
Supplement: c9mo00130a1.cys [file c9mo00130a1.cys › CytoscapeSession-2019_09_26-22_01/tables/36-Pan_network_lfc1.txt/LOCAL_ATTRS-org.cytoscape.model.CyNode-36+default+node.cytable]

CyCSV-Version	1
SUID	name	selected
java.lang.Long	java.lang.String	java.lang.Boolean
36 default node
288		false
1181		false
284		false
408		false
915		false
914		false
1681		false
778		false
265		false
264		false
1799		false
516		false
771		false
1281		false
641		false
512		false
1662		false
382		false
1530		false
634		false
1272		false
248		false
375		false
367		false
878		false
622		false
494		false
750		false
365		false
490		false
105		false
232		false
102		false
2022		false
2021		false
101		false
229		false
2148		false
736		false
94		false
1244		false
1500		false
603		false
2011		false
2137		false
601		false
89		false
87		false
86		false
85		false
1109		false
980		false
82		false
1744		false
336		false
79		false
847		false
335		false
2126		false
206		false
205		false
76		false
1100		false
844		false
588		false
459		false
74		false
200		false
583		false
454		false
704		false
318		false
1212		false
700		false
826		false
314		false
177		false
303		false
2730		false
170		false
1321		false
1957		false
805		false
1956		false
676		false
2077		false
1051		false
2075		false
1050		false
1049		false
1048		false
2070		false
2067		false
1041		false
1036		false
2060		false
1034		false
2053		false
1029		false
2047		false
1022		false
1016		false
1015		false
1014		false
1013		false
2035		false
1006		false
2029		false
1004		false
1003		false
1001		false
996		false
2020		false
993		false
991		false
985		false
984		false
983		false
2006		false
2005		false
977		false
976		false
974		false
972		false
971		false
967		false
1987		false
962		false
959		false
1982		false
952		false
1975		false
951		false
950		false
1973		false
946		false
945		false
1968		false
941		false
940		false
938		false
1961		false
936		false
934		false
932		false
1955		false
931		false
928		false
927		false
1951		false
926		false
925		false
1948		false
1941		false
1939		false
913		false
1934		false
910		false
909		false
908		false
1931		false
903		false
1927		false
1926		false
899		false
898		false
1922		false
897		false
896		false
895		false
894		false
892		false
1912		false
1911		false
887		false
1910		false
884		false
1908		false
882		false
881		false
1903		false
876		false
873		false
1895		false
868		false
865		false
862		false
1886		false
860		false
1881		false
1877		false
852		false
1875		false
851		false
850		false
1871		false
845		false
1868		false
843		false
1867		false
842		false
839		false
837		false
836		false
1860		false
835		false
834		false
1857		false
831		false
827		false
824		false
1845		false
820		false
1842		false
818		false
815		false
814		false
813		false
1835		false
807		false
806		false
1827		false
802		false
801		false
1825		false
796		false
790		false
788		false
787		false
1811		false
785		false
784		false
783		false
781		false
780		false
1803		false
2826		false
774		false
772		false
1793		false
1792		false
767		false
1791		false
1790		false
765		false
764		false
762		false
761		false
1784		false
760		false
757		false
755		false
754		false
751		false
748		false
747		false
1770		false
1768		false
742		false
739		false
1759		false
734		false
726		false
724		false
723		false
1746		false
1745		false
721		false
720		false
1743		false
718		false
716		false
715		false
1739		false
713		false
709		false
708		false
707		false
706		false
1729		false
1728		false
2748		false
699		false
698		false
697		false
1718		false
694		false
2741		false
693		false
2740		false
691		false
689		false
688		false
687		false
1711		false
1710		false
686		false
2733		false
2732		false
683		false
679		false
678		false
2725		false
2723		false
2721		false
673		false
672		false
1692		false
1690		false
666		false
665		false
663		false
1687		false
1686		false
2708		false
659		false
2705		false
657		false
1680		false
1679		false
654		false
1676		false
651		false
650		false
2697		false
1673		false
648		false
2695		false
2694		false
2693		false
644		false
2689		false
638		false
2685		false
633		false
631		false
630		false
629		false
1653		false
627		false
1651		false
625		false
1647		false
621		false
1644		false
620		false
619		false
1642		false
617		false
616		false
611		false
1634		false
609		false
602		false
1624		false
598		false
1620		false
594		false
592		false
1616		false
591		false
586		false
1609		false
582		false
581		false
576		false
574		false
572		false
1595		false
568		false
564		false
563		false
560		false
559		false
1582		false
558		false
557		false
556		false
1578		false
554		false
1577		false
552		false
547		false
546		false
545		false
544		false
1567		false
543		false
541		false
535		false
1559		false
530		false
529		false
528		false
1552		false
525		false
1549		false
1548		false
523		false
521		false
520		false
519		false
518		false
1541		false
515		false
1538		false
1531		false
507		false
506		false
1525		false
1523		false
1522		false
492		false
491		false
1513		false
1512		false
1508		false
484		false
1505		false
479		false
476		false
475		false
474		false
473		false
1496		false
471		false
1494		false
468		false
466		false
1489		false
465		false
464		false
462		false
456		false
1475		false
1474		false
1471		false
446		false
445		false
444		false
1466		false
442		false
1465		false
441		false
436		false
1457		false
432		false
431		false
430		false
1454		false
429		false
1453		false
427		false
426		false
425		false
424		false
1446		false
422		false
421		false
1443		false
1442		false
416		false
415		false
1438		false
1436		false
410		false
1433		false
409		false
407		false
404		false
400		false
399		false
398		false
1422		false
396		false
395		false
394		false
393		false
392		false
1414		false
390		false
389		false
1412		false
1406		false
380		false
379		false
377		false
374		false
373		false
372		false
370		false
1394		false
2415		false
1389		false
2412		false
1387		false
1386		false
362		false
356		false
1379		false
354		false
352		false
1376		false
2398		false
2396		false
345		false
342		false
2384		false
334		false
2381		false
332		false
330		false
1353		false
328		false
326		false
2373		false
325		false
2372		false
1346		false
321		false
1341		false
2365		false
2362		false
1333		false
2355		false
307		false
2354		false
306		false
1328		false
304		false
302		false
1325		false
301		false
1324		false
299		false
297		false
2344		false
1320		false
291		false
290		false
289		false
286		false
1310		false
1309		false
283		false
282		false
280		false
2327		false
279		false
277		false
276		false
275		false
1296		false
271		false
270		false
269		false
268		false
1291		false
267		false
2314		false
266		false
1289		false
1285		false
261		false
2308		false
1284		false
260		false
2306		false
1282		false
258		false
2302		false
254		false
1277		false
2300		false
252		false
251		false
1275		false
250		false
249		false
247		false
1271		false
246		false
245		false
243		false
241		false
240		false
1264		false
2285		false
1260		false
235		false
233		false
231		false
1255		false
2279		false
230		false
227		false
1251		false
2273		false
224		false
223		false
1246		false
222		false
220		false
2268		false
219		false
218		false
2265		false
1239		false
212		false
1236		false
211		false
208		false
2256		false
2254		false
204		false
202		false
2249		false
201		false
2248		false
1223		false
199		false
198		false
196		false
195		false
2243		false
193		false
191		false
1215		false
1214		false
2236		false
186		false
1209		false
2232		false
1208		false
183		false
1207		false
181		false
179		false
1200		false
176		false
175		false
174		false
173		false
172		false
2218		false
2217		false
169		false
2216		false
167		false
165		false
1186		false
2209		false
159		false
158		false
1182		false
2203		false
2200		false
2199		false
150		false
149		false
148		false
2194		false
146		false
1168		false
2192		false
144		false
2191		false
143		false
2190		false
140		false
139		false
138		false
136		false
135		false
133		false
2181		false
131		false
2176		false
2175		false
2174		false
1150		false
2173		false
124		false
119		false
2164		false
1139		false
115		false
2162		false
114		false
1138		false
1137		false
2160		false
108		false
107		false
106		false
1130		false
1129		false
2152		false
103		false
99		false
2147		false
1122		false
2145		false
1121		false
1120		false
1117		false
92		false
1113		false
2134		false
2133		false
83		false
2131		false
1106		false
81		false
2127		false
1102		false
77		false
1099		false
2122		false
1094		false
1093		false
2117		false
1087		false
2110		false
1086		false
2107		false
2106		false
1079		false
1076		false
2099		false
1075		false
1073		false
1071		false
1070		false
2093		false
1069		false
1068		false
1066		false
1065		false
1064		false
2084		false
1059		false
1823		false
2430		false
2781		false
316		false
1947		false
1083		false
2841		false
1337		false
2805		false
2259		false
1391		false
2766		false
1547		false
1929		false
1161		false
1125		false
869		false
1252		false
1521		false
2838		false
2829		false
1316		false
1057		false
1053		false
2076		false
2072		false
1046		false
1045		false
1044		false
2068		false
2065		false
1038		false
1033		false
1032		false
1031		false
2052		false
2050		false
1024		false
1021		false
1020		false
2041		false
2038		false
2037		false
1012		false
2036		false
2034		false
1009		false
2030		false
1002		false
998		false
997		false
2019		false
2017		false
2016		false
2012		false
2007		false
2004		false
979		false
2003		false
978		false
2002		false
2001		false
973		false
1996		false
970		false
969		false
966		false
1989		false
963		false
1983		false
958		false
955		false
954		false
1974		false
942		false
1965		false
937		false
935		false
933		false
1954		false
1953		false
1949		false
924		false
922		false
920		false
1944		false
1943		false
918		false
912		false
911		false
1935		false
1933		false
1932		false
904		false
902		false
1925		false
901		false
1920		false
1918		false
893		false
1915		false
891		false
889		false
886		false
883		false
1905		false
879		false
877		false
875		false
874		false
1896		false
872		false
871		false
1893		false
867		false
866		false
1889		false
1888		false
1887		false
861		false
859		false
1880		false
855		false
1878		false
853		false
849		false
848		false
846		false
1866		false
841		false
840		false
1859		false
833		false
1856		false
828		false
825		false
823		false
822		false
1846		false
821		false
1843		false
1841		false
1840		false
816		false
1837		false
811		false
810		false
1834		false
1829		false
1826		false
797		false
1821		false
1820		false
1819		false
794		false
793		false
1814		false
1813		false
786		false
1808		false
1807		false
2830		false
779		false
1801		false
1800		false
775		false
2822		false
1796		false
770		false
769		false
763		false
759		false
758		false
1779		false
753		false
752		false
1771		false
746		false
1764		false
1760		false
735		false
1758		false
733		false
732		false
1753		false
729		false
728		false
727		false
1751		false
725		false
719		false
1740		false
714		false
711		false
710		false
1732		false
1731		false
705		false
703		false
702		false
701		false
1722		false
695		false
1716		false
692		false
690		false
1714		false
1713		false
2734		false
1709		false
1708		false
2731		false
682		false
681		false
680		false
2726		false
677		false
675		false
2722		false
674		false
2719		false
671		false
670		false
669		false
668		false
2714		false
2713		false
664		false
2711		false
661		false
660		false
656		false
652		false
2700		false
647		false
1669		false
1666		false
640		false
1663		false
2686		false
636		false
2684		false
635		false
632		false
1650		false
624		false
1645		false
615		false
1637		false
608		false
607		false
606		false
605		false
1629		false
1626		false
600		false
596		false
595		false
593		false
590		false
589		false
1612		false
585		false
1605		false
579		false
575		false
573		false
571		false
570		false
569		false
1591		false
566		false
565		false
551		false
550		false
1573		false
1569		false
1568		false
542		false
539		false
1561		false
534		false
533		false
532		false
531		false
1555		false
1553		false
1551		false
526		false
1550		false
517		false
1540		false
1536		false
511		false
509		false
1532		false
508		false
1528		false
501		false
1524		false
1519		false
1516		false
1515		false
489		false
486		false
483		false
482		false
481		false
480		false
477		false
1495		false
1492		false
1491		false
1487		false
463		false
460		false
1483		false
457		false
455		false
1479		false
453		false
452		false
450		false
1472		false
2487		false
1463		false
437		false
435		false
1459		false
434		false
1451		false
1450		false
420		false
419		false
418		false
417		false
2465		false
1437		false
413		false
412		false
1434		false
406		false
403		false
1427		false
1424		false
397		false
2444		false
1419		false
2442		false
1418		false
1416		false
388		false
1411		false
387		false
1410		false
385		false
384		false
1408		false
381		false
1401		false
376		false
1396		false
371		false
2416		false
366		false
1390		false
1385		false
361		false
359		false
358		false
355		false
2399		false
1375		false
349		false
347		false
346		false
344		false
341		false
1365		false
340		false
1364		false
1363		false
339		false
338		false
1361		false
1360		false
1359		false
333		false
331		false
2379		false
329		false
2374		false
324		false
1347		false
1345		false
320		false
2368		false
1344		false
1343		false
1339		false
313		false
1335		false
2359		false
1334		false
310		false
1330		false
305		false
2350		false
1322		false
298		false
295		false
2342		false
294		false
293		false
292		false
1315		false
1312		false
287		false
2333		false
1307		false
1306		false
1305		false
281		false
1304		false
1303		false
278		false
2326		false
1301		false
274		false
1298		false
273		false
2319		false
2318		false
1294		false
1293		false
1288		false
263		false
259		false
2307		false
2305		false
257		false
256		false
255		false
253		false
2301		false
2299		false
1274		false
244		false
2291		false
242		false
2288		false
239		false
1263		false
238		false
1261		false
2284		false
236		false
234		false
2277		false
228		false
1250		false
226		false
2274		false
225		false
1247		false
1243		false
215		false
2262		false
213		false
2261		false
1235		false
1233		false
1232		false
207		false
1227		false
203		false
2250		false
1226		false
1224		false
2244		false
1220		false
194		false
2239		false
2238		false
2237		false
2234		false
184		false
1206		false
1204		false
1203		false
1202		false
178		false
1198		false
1195		false
168		false
1191		false
166		false
2214		false
164		false
163		false
162		false
1184		false
2204		false
1179		false
155		false
154		false
2201		false
153		false
152		false
151		false
2198		false
1173		false
147		false
1170		false
141		false
2186		false
137		false
2185		false
1157		false
1156		false
132		false
128		false
127		false
126		false
2172		false
123		false
122		false
1145		false
1144		false
118		false
2166		false
1142		false
116		false
2163		false
113		false
111		false
2157		false
1131		false
2150		false
1123		false
1119		false
2142		false
2140		false
91		false
1115		false
90		false
1110		false
1108		false
1107		false
1105		false
2129		false
80		false
78		false
1101		false
75		false
2123		false
1098		false
1096		false
1095		false
1091		false
1089		false
1085		false
2109		false
1084		false
1082		false
1081		false
2104		false
2103		false
2101		false
1074		false
2098		false
2095		false
2094		false
2091		false
2090		false
1061		false
