# Supplementary material for: Regulatory network analysis of Paneth cell and goblet cell enriched gut organoids using transcriptomics approaches
Source: Royal Society of Chemistry journal article supplement (doi:10.1039/c9mo00130a), 2019-12-10
Supplement: c9mo00130a1.cys [file c9mo00130a1.cys › CytoscapeSession-2019_09_26-22_01/tables/36-Pan_network_lfc1.txt/SHARED_ATTRS-org.cytoscape.model.CyEdge-36+shared+edge.cytable]

CyCSV-Version	1
SUID	isInPath	Module_Edge_Color	shared interaction	shared name
java.lang.Long	java.lang.Boolean	java.lang.Integer	java.lang.String	java.lang.String
		mutable
36 shared edge
26942	false	-1	TF-TG	ENSMUSG00000037169 (TF-TG) ENSMUSG00000032380
26940	false	-1	TF-TG	ENSMUSG00000037169 (TF-TG) ENSMUSG00000032245
26938	false	-1	TF-TG	ENSMUSG00000037169 (TF-TG) ENSMUSG00000032026
26937	false	-1	TF-TG	ENSMUSG00000037169 (TF-TG) ENSMUSG00000032018
26931	false	-1	TF-TG	ENSMUSG00000037169 (TF-TG) ENSMUSG00000030287
26930	false	-1	TF-TG	ENSMUSG00000037169 (TF-TG) ENSMUSG00000030246
26927	false	-1	TF-TG	ENSMUSG00000037169 (TF-TG) ENSMUSG00000029814
26926	false	-1	TF-TG	ENSMUSG00000037169 (TF-TG) ENSMUSG00000029560
26925	false	-1	TF-TG	ENSMUSG00000037169 (TF-TG) ENSMUSG00000029330
26921	false	-1	TF-TG	ENSMUSG00000037169 (TF-TG) ENSMUSG00000028649
26920	false	-1	TF-TG	ENSMUSG00000037169 (TF-TG) ENSMUSG00000028602
26919	false	-1	TF-TG	ENSMUSG00000037169 (TF-TG) ENSMUSG00000028341
26918	false	-1	TF-TG	ENSMUSG00000037169 (TF-TG) ENSMUSG00000028211
26914	false	-1	TF-TG	ENSMUSG00000037169 (TF-TG) ENSMUSG00000027313
26913	false	-1	TF-TG	ENSMUSG00000037169 (TF-TG) ENSMUSG00000026820
26911	false	-1	TF-TG	ENSMUSG00000037169 (TF-TG) ENSMUSG00000026782
26910	false	-1	TF-TG	ENSMUSG00000037169 (TF-TG) ENSMUSG00000026649
26908	false	-1	TF-TG	ENSMUSG00000037169 (TF-TG) ENSMUSG00000026107
26907	false	-1	TF-TG	ENSMUSG00000037169 (TF-TG) ENSMUSG00000026103
26906	false	-1	TF-TG	ENSMUSG00000037169 (TF-TG) ENSMUSG00000025921
26901	false	-1	TF-TG	ENSMUSG00000037169 (TF-TG) ENSMUSG00000024743
26900	false	-1	TF-TG	ENSMUSG00000037169 (TF-TG) ENSMUSG00000024665
26899	false	-1	TF-TG	ENSMUSG00000037169 (TF-TG) ENSMUSG00000024601
26895	false	-1	TF-TG	ENSMUSG00000037169 (TF-TG) ENSMUSG00000024525
26894	false	-1	TF-TG	ENSMUSG00000037169 (TF-TG) ENSMUSG00000024378
26892	false	-1	TF-TG	ENSMUSG00000037169 (TF-TG) ENSMUSG00000024193
26889	false	-1	TF-TG	ENSMUSG00000037169 (TF-TG) ENSMUSG00000024074
26887	false	-1	TF-TG	ENSMUSG00000037169 (TF-TG) ENSMUSG00000024033
26886	false	-1	TF-TG	ENSMUSG00000037169 (TF-TG) ENSMUSG00000024030
26882	false	-1	TF-TG	ENSMUSG00000037169 (TF-TG) ENSMUSG00000023017
26881	false	-1	TF-TG	ENSMUSG00000037169 (TF-TG) ENSMUSG00000023008
26879	false	-1	TF-TG	ENSMUSG00000037169 (TF-TG) ENSMUSG00000022995
26874	false	-1	TF-TG	ENSMUSG00000037169 (TF-TG) ENSMUSG00000022253
26872	false	-1	TF-TG	ENSMUSG00000037169 (TF-TG) ENSMUSG00000022094
26871	false	-1	TF-TG	ENSMUSG00000037169 (TF-TG) ENSMUSG00000021876
26870	false	-1	TF-TG	ENSMUSG00000037169 (TF-TG) ENSMUSG00000021831
26866	false	-1	TF-TG	ENSMUSG00000037169 (TF-TG) ENSMUSG00000021196
26863	false	-1	TF-TG	ENSMUSG00000037169 (TF-TG) ENSMUSG00000020872
26862	false	-1	TF-TG	ENSMUSG00000037169 (TF-TG) ENSMUSG00000020838
26860	false	-1	TF-TG	ENSMUSG00000037169 (TF-TG) ENSMUSG00000020471
26858	false	-1	TF-TG	ENSMUSG00000037169 (TF-TG) ENSMUSG00000020402
26856	false	-1	TF-TG	ENSMUSG00000037169 (TF-TG) ENSMUSG00000020376
26851	false	-1	TF-TG	ENSMUSG00000037169 (TF-TG) ENSMUSG00000020015
26850	false	-1	TF-TG	ENSMUSG00000037169 (TF-TG) ENSMUSG00000019986
26849	false	-1	TF-TG	ENSMUSG00000037169 (TF-TG) ENSMUSG00000019916
26848	false	-1	TF-TG	ENSMUSG00000037169 (TF-TG) ENSMUSG00000019796
26846	false	-1	TF-TG	ENSMUSG00000037169 (TF-TG) ENSMUSG00000019564
26845	false	-1	TF-TG	ENSMUSG00000037169 (TF-TG) ENSMUSG00000018411
26842	false	-1	TF-TG	ENSMUSG00000037169 (TF-TG) ENSMUSG00000017716
26840	false	-1	TF-TG	ENSMUSG00000037169 (TF-TG) ENSMUSG00000015745
26839	false	-1	TF-TG	ENSMUSG00000037169 (TF-TG) ENSMUSG00000013089
26836	false	-1	TF-TG	ENSMUSG00000037169 (TF-TG) ENSMUSG00000010021
26835	false	-1	TF-TG	ENSMUSG00000037169 (TF-TG) ENSMUSG00000009739
26834	false	-1	TF-TG	ENSMUSG00000037169 (TF-TG) ENSMUSG00000006731
26823	false	-1	TF-TG	ENSMUSG00000037169 (TF-TG) ENSMUSG00000000126
26822	false	-1	TF-TG	ENSMUSG00000037169 (TF-TG) ENSMUSG00000000056
18209	false	-1	TF-lincRNA	ENSMUSG00000035158 (TF-lincRNA) ENSMUSG00000097287
18208	false	-1	TF-lincRNA	ENSMUSG00000035158 (TF-lincRNA) ENSMUSG00000097561
18207	false	-1	TF-lincRNA	ENSMUSG00000035158 (TF-lincRNA) ENSMUSG00000085183
18204	false	-1	TF-TG	ENSMUSG00000035158 (TF-TG) ENSMUSG00000098715
18201	false	-1	TF-TG	ENSMUSG00000035158 (TF-TG) ENSMUSG00000081769
18200	false	-1	TF-TG	ENSMUSG00000035158 (TF-TG) ENSMUSG00000079037
18199	false	-1	TF-TG	ENSMUSG00000035158 (TF-TG) ENSMUSG00000078566
18197	false	-1	TF-TG	ENSMUSG00000035158 (TF-TG) ENSMUSG00000074715
18196	false	-1	TF-TG	ENSMUSG00000035158 (TF-TG) ENSMUSG00000074218
18194	false	-1	TF-TG	ENSMUSG00000035158 (TF-TG) ENSMUSG00000072115
18192	false	-1	TF-TG	ENSMUSG00000035158 (TF-TG) ENSMUSG00000069622
18188	false	-1	TF-TG	ENSMUSG00000035158 (TF-TG) ENSMUSG00000064262
18187	false	-1	TF-TG	ENSMUSG00000035158 (TF-TG) ENSMUSG00000064215
18186	false	-1	TF-TG	ENSMUSG00000035158 (TF-TG) ENSMUSG00000063568
18185	false	-1	TF-TG	ENSMUSG00000035158 (TF-TG) ENSMUSG00000063439
18184	false	-1	TF-TG	ENSMUSG00000035158 (TF-TG) ENSMUSG00000063229
18183	false	-1	TF-TG	ENSMUSG00000035158 (TF-TG) ENSMUSG00000062248
18182	false	-1	TF-TG	ENSMUSG00000035158 (TF-TG) ENSMUSG00000062078
18181	false	-1	TF-TG	ENSMUSG00000035158 (TF-TG) ENSMUSG00000061414
18178	false	-1	TF-TG	ENSMUSG00000035158 (TF-TG) ENSMUSG00000059824
18176	false	-1	TF-TG	ENSMUSG00000035158 (TF-TG) ENSMUSG00000058794
18174	false	-1	TF-TG	ENSMUSG00000035158 (TF-TG) ENSMUSG00000058145
18169	false	-1	TF-TG	ENSMUSG00000035158 (TF-TG) ENSMUSG00000056888
18165	false	-1	TF-TG	ENSMUSG00000035158 (TF-TG) ENSMUSG00000056069
18164	false	-1	TF-TG	ENSMUSG00000035158 (TF-TG) ENSMUSG00000055493
18163	false	-1	TF-TG	ENSMUSG00000035158 (TF-TG) ENSMUSG00000054920
18162	false	-1	TF-TG	ENSMUSG00000035158 (TF-TG) ENSMUSG00000054422
18160	false	-1	TF-TG	ENSMUSG00000035158 (TF-TG) ENSMUSG00000054150
18159	false	-1	TF-TG	ENSMUSG00000035158 (TF-TG) ENSMUSG00000053604
18158	false	-1	TF-TG	ENSMUSG00000035158 (TF-TG) ENSMUSG00000053580
18151	false	-1	TF-TG	ENSMUSG00000035158 (TF-TG) ENSMUSG00000049878
18149	false	-1	TF-TG	ENSMUSG00000035158 (TF-TG) ENSMUSG00000048473
18148	false	-1	TF-TG	ENSMUSG00000035158 (TF-TG) ENSMUSG00000048376
18147	false	-1	TF-TG	ENSMUSG00000035158 (TF-TG) ENSMUSG00000048058
18142	false	-1	TF-TG	ENSMUSG00000035158 (TF-TG) ENSMUSG00000046814
18140	false	-1	TF-TG	ENSMUSG00000035158 (TF-TG) ENSMUSG00000046058
18137	false	-1	TF-TG	ENSMUSG00000035158 (TF-TG) ENSMUSG00000043004
18135	false	-1	TF-TG	ENSMUSG00000035158 (TF-TG) ENSMUSG00000042096
18134	false	-1	TF-TG	ENSMUSG00000035158 (TF-TG) ENSMUSG00000041930
18127	false	-1	TF-TG	ENSMUSG00000035158 (TF-TG) ENSMUSG00000041058
18126	false	-1	TF-TG	ENSMUSG00000035158 (TF-TG) ENSMUSG00000041040
18125	false	-1	TF-TG	ENSMUSG00000035158 (TF-TG) ENSMUSG00000040447
18124	false	-1	TF-TG	ENSMUSG00000035158 (TF-TG) ENSMUSG00000040345
18123	false	-1	TF-TG	ENSMUSG00000035158 (TF-TG) ENSMUSG00000040280
18122	false	-1	TF-TG	ENSMUSG00000035158 (TF-TG) ENSMUSG00000040084
18118	false	-1	TF-TG	ENSMUSG00000035158 (TF-TG) ENSMUSG00000039158
18117	false	-1	TF-TG	ENSMUSG00000035158 (TF-TG) ENSMUSG00000039050
18115	false	-1	TF-TG	ENSMUSG00000035158 (TF-TG) ENSMUSG00000038843
18114	false	-1	TF-TG	ENSMUSG00000035158 (TF-TG) ENSMUSG00000038451
18112	false	-1	TF-TG	ENSMUSG00000035158 (TF-TG) ENSMUSG00000038175
18109	false	-1	TF-TG	ENSMUSG00000035158 (TF-TG) ENSMUSG00000037315
18108	false	-1	TF-TG	ENSMUSG00000035158 (TF-TG) ENSMUSG00000037235
18107	false	-1	TF-TG	ENSMUSG00000035158 (TF-TG) ENSMUSG00000035711
18106	false	-1	TF-TG	ENSMUSG00000035158 (TF-TG) ENSMUSG00000035441
18105	false	-1	TF-TG	ENSMUSG00000035158 (TF-TG) ENSMUSG00000035239
18100	false	-1	TF-TG	ENSMUSG00000035158 (TF-TG) ENSMUSG00000034413
18099	false	-1	TF-TG	ENSMUSG00000035158 (TF-TG) ENSMUSG00000034116
18096	false	-1	TF-TG	ENSMUSG00000035158 (TF-TG) ENSMUSG00000033530
18094	false	-1	TF-TG	ENSMUSG00000035158 (TF-TG) ENSMUSG00000033161
18093	false	-1	TF-TG	ENSMUSG00000035158 (TF-TG) ENSMUSG00000033107
18092	false	-1	TF-TG	ENSMUSG00000035158 (TF-TG) ENSMUSG00000033105
18091	false	-1	TF-TG	ENSMUSG00000035158 (TF-TG) ENSMUSG00000032783
18090	false	-1	TF-TG	ENSMUSG00000035158 (TF-TG) ENSMUSG00000032754
18089	false	-1	TF-TG	ENSMUSG00000035158 (TF-TG) ENSMUSG00000032740
18087	false	-1	TF-TG	ENSMUSG00000035158 (TF-TG) ENSMUSG00000032431
18085	false	-1	TF-TG	ENSMUSG00000035158 (TF-TG) ENSMUSG00000032245
18083	false	-1	TF-TG	ENSMUSG00000035158 (TF-TG) ENSMUSG00000032018
18082	false	-1	TF-TG	ENSMUSG00000035158 (TF-TG) ENSMUSG00000031903
18076	false	-1	TF-TG	ENSMUSG00000035158 (TF-TG) ENSMUSG00000031367
18074	false	-1	TF-TG	ENSMUSG00000035158 (TF-TG) ENSMUSG00000030772
18073	false	-1	TF-TG	ENSMUSG00000035158 (TF-TG) ENSMUSG00000030762
18072	false	-1	TF-TG	ENSMUSG00000035158 (TF-TG) ENSMUSG00000030528
18068	false	-1	TF-TG	ENSMUSG00000035158 (TF-TG) ENSMUSG00000029772
18066	false	-1	TF-TG	ENSMUSG00000035158 (TF-TG) ENSMUSG00000029560
18065	false	-1	TF-TG	ENSMUSG00000035158 (TF-TG) ENSMUSG00000029470
18063	false	-1	TF-TG	ENSMUSG00000035158 (TF-TG) ENSMUSG00000029177
18061	false	-1	TF-TG	ENSMUSG00000035158 (TF-TG) ENSMUSG00000028943
18057	false	-1	TF-TG	ENSMUSG00000035158 (TF-TG) ENSMUSG00000028614
18056	false	-1	TF-TG	ENSMUSG00000035158 (TF-TG) ENSMUSG00000028576
18055	false	-1	TF-TG	ENSMUSG00000035158 (TF-TG) ENSMUSG00000028555
18054	false	-1	TF-TG	ENSMUSG00000035158 (TF-TG) ENSMUSG00000028542
18053	false	-1	TF-TG	ENSMUSG00000035158 (TF-TG) ENSMUSG00000028341
18051	false	-1	TF-TG	ENSMUSG00000035158 (TF-TG) ENSMUSG00000028211
18049	false	-1	TF-TG	ENSMUSG00000035158 (TF-TG) ENSMUSG00000027883
18046	false	-1	TF-TG	ENSMUSG00000035158 (TF-TG) ENSMUSG00000027435
18044	false	-1	TF-TG	ENSMUSG00000035158 (TF-TG) ENSMUSG00000026921
18043	false	-1	TF-TG	ENSMUSG00000035158 (TF-TG) ENSMUSG00000026879
18042	false	-1	TF-TG	ENSMUSG00000035158 (TF-TG) ENSMUSG00000026820
18040	false	-1	TF-TG	ENSMUSG00000035158 (TF-TG) ENSMUSG00000026223
18039	false	-1	TF-TG	ENSMUSG00000035158 (TF-TG) ENSMUSG00000026107
18038	false	-1	TF-TG	ENSMUSG00000035158 (TF-TG) ENSMUSG00000025780
18037	false	-1	TF-TG	ENSMUSG00000035158 (TF-TG) ENSMUSG00000025608
18035	false	-1	TF-TG	ENSMUSG00000035158 (TF-TG) ENSMUSG00000025203
18034	false	-1	TF-TG	ENSMUSG00000035158 (TF-TG) ENSMUSG00000025176
18033	false	-1	TF-TG	ENSMUSG00000035158 (TF-TG) ENSMUSG00000025161
18031	false	-1	TF-TG	ENSMUSG00000035158 (TF-TG) ENSMUSG00000024665
18027	false	-1	TF-TG	ENSMUSG00000035158 (TF-TG) ENSMUSG00000024378
18024	false	-1	TF-TG	ENSMUSG00000035158 (TF-TG) ENSMUSG00000022864
18022	false	-1	TF-TG	ENSMUSG00000035158 (TF-TG) ENSMUSG00000022555
18019	false	-1	TF-TG	ENSMUSG00000035158 (TF-TG) ENSMUSG00000022364
38498	false	-1	miRNA-mRNA	mmu-miR-125b-5p (miRNA-mRNA) ENSMUSG00000062078
18017	false	-1	TF-TG	ENSMUSG00000035158 (TF-TG) ENSMUSG00000022217
38496	false	-1	miRNA-mRNA	mmu-miR-125b-5p (miRNA-mRNA) ENSMUSG00000067889
18016	false	-1	TF-TG	ENSMUSG00000035158 (TF-TG) ENSMUSG00000022136
38492	false	-1	miRNA-mRNA	mmu-miR-125b-5p (miRNA-mRNA) ENSMUSG00000060961
18012	false	-1	TF-TG	ENSMUSG00000035158 (TF-TG) ENSMUSG00000021876
18011	false	-1	TF-TG	ENSMUSG00000035158 (TF-TG) ENSMUSG00000021831
18010	false	-1	TF-TG	ENSMUSG00000035158 (TF-TG) ENSMUSG00000021822
18008	false	-1	TF-TG	ENSMUSG00000035158 (TF-TG) ENSMUSG00000021453
18007	false	-1	TF-TG	ENSMUSG00000035158 (TF-TG) ENSMUSG00000021108
18006	false	-1	TF-TG	ENSMUSG00000035158 (TF-TG) ENSMUSG00000020978
38485	false	-1	miRNA-mRNA	mmu-miR-125b-5p (miRNA-mRNA) ENSMUSG00000056973
18004	false	-1	TF-TG	ENSMUSG00000035158 (TF-TG) ENSMUSG00000020838
18003	false	-1	TF-TG	ENSMUSG00000035158 (TF-TG) ENSMUSG00000020435
18002	false	-1	TF-TG	ENSMUSG00000035158 (TF-TG) ENSMUSG00000020402
18001	false	-1	TF-TG	ENSMUSG00000035158 (TF-TG) ENSMUSG00000020376
18000	false	-1	TF-TG	ENSMUSG00000035158 (TF-TG) ENSMUSG00000020261
17999	false	-1	TF-TG	ENSMUSG00000035158 (TF-TG) ENSMUSG00000020014
17998	false	-1	TF-TG	ENSMUSG00000035158 (TF-TG) ENSMUSG00000019194
17997	false	-1	TF-TG	ENSMUSG00000035158 (TF-TG) ENSMUSG00000018906
17994	false	-1	TF-TG	ENSMUSG00000035158 (TF-TG) ENSMUSG00000017652
38473	false	-1	miRNA-mRNA	mmu-miR-125b-5p (miRNA-mRNA) ENSMUSG00000054150
17993	false	-1	TF-TG	ENSMUSG00000035158 (TF-TG) ENSMUSG00000017466
17990	false	-1	TF-TG	ENSMUSG00000035158 (TF-TG) ENSMUSG00000014303
17989	false	-1	TF-TG	ENSMUSG00000035158 (TF-TG) ENSMUSG00000012126
38468	false	-1	miRNA-mRNA	mmu-miR-125b-5p (miRNA-mRNA) ENSMUSG00000046546
17987	false	-1	TF-TG	ENSMUSG00000035158 (TF-TG) ENSMUSG00000011148
17985	false	-1	TF-TG	ENSMUSG00000035158 (TF-TG) ENSMUSG00000006642
38461	false	-1	miRNA-mRNA	mmu-miR-125b-5p (miRNA-mRNA) ENSMUSG00000049878
17981	false	-1	TF-TG	ENSMUSG00000035158 (TF-TG) ENSMUSG00000005873
38460	false	-1	miRNA-mRNA	mmu-miR-125b-5p (miRNA-mRNA) ENSMUSG00000048279
17980	false	-1	TF-TG	ENSMUSG00000035158 (TF-TG) ENSMUSG00000005413
38458	false	-1	miRNA-mRNA	mmu-miR-125b-5p (miRNA-mRNA) ENSMUSG00000047797
38457	false	-1	miRNA-mRNA	mmu-miR-125b-5p (miRNA-mRNA) ENSMUSG00000050064
17977	false	-1	TF-TG	ENSMUSG00000035158 (TF-TG) ENSMUSG00000004270
38455	false	-1	miRNA-mRNA	mmu-miR-125b-5p (miRNA-mRNA) ENSMUSG00000050592
17975	false	-1	TF-TG	ENSMUSG00000035158 (TF-TG) ENSMUSG00000002997
17974	false	-1	TF-TG	ENSMUSG00000035158 (TF-TG) ENSMUSG00000002885
38453	false	-1	miRNA-mRNA	mmu-miR-125b-5p (miRNA-mRNA) ENSMUSG00000048058
38450	false	-1	miRNA-mRNA	mmu-miR-125b-5p (miRNA-mRNA) ENSMUSG00000050240
17970	false	-1	TF-TG	ENSMUSG00000035158 (TF-TG) ENSMUSG00000000791
38448	false	-1	miRNA-mRNA	mmu-miR-125b-5p (miRNA-mRNA) ENSMUSG00000048232
17968	false	-1	TF-TG	ENSMUSG00000035158 (TF-TG) ENSMUSG00000000120
38443	false	-1	miRNA-mRNA	mmu-miR-125b-5p (miRNA-mRNA) ENSMUSG00000044674
38441	false	-1	miRNA-mRNA	mmu-miR-125b-5p (miRNA-mRNA) ENSMUSG00000042035
38439	false	-1	miRNA-mRNA	mmu-miR-125b-5p (miRNA-mRNA) ENSMUSG00000042647
38438	false	-1	miRNA-mRNA	mmu-miR-125b-5p (miRNA-mRNA) ENSMUSG00000043639
38426	false	-1	miRNA-mRNA	mmu-miR-125b-5p (miRNA-mRNA) ENSMUSG00000039114
38423	false	-1	miRNA-mRNA	mmu-miR-125b-5p (miRNA-mRNA) ENSMUSG00000039943
38418	false	-1	miRNA-mRNA	mmu-miR-125b-5p (miRNA-mRNA) ENSMUSG00000038843
38409	false	-1	miRNA-mRNA	mmu-miR-125b-5p (miRNA-mRNA) ENSMUSG00000038486
38406	false	-1	miRNA-mRNA	mmu-miR-125b-5p (miRNA-mRNA) ENSMUSG00000037936
38405	false	-1	miRNA-mRNA	mmu-miR-125b-5p (miRNA-mRNA) ENSMUSG00000037621
38404	false	-1	miRNA-mRNA	mmu-miR-125b-5p (miRNA-mRNA) ENSMUSG00000037235
38398	false	-1	miRNA-mRNA	mmu-miR-125b-5p (miRNA-mRNA) ENSMUSG00000034413
38395	false	-1	miRNA-mRNA	mmu-miR-125b-5p (miRNA-mRNA) ENSMUSG00000035158
38393	false	-1	miRNA-mRNA	mmu-miR-125b-5p (miRNA-mRNA) ENSMUSG00000032855
38389	false	-1	miRNA-mRNA	mmu-miR-125b-5p (miRNA-mRNA) ENSMUSG00000033871
38388	false	-1	miRNA-mRNA	mmu-miR-125b-5p (miRNA-mRNA) ENSMUSG00000032754
38386	false	-1	miRNA-mRNA	mmu-miR-125b-5p (miRNA-mRNA) ENSMUSG00000032411
38383	false	-1	miRNA-mRNA	mmu-miR-125b-5p (miRNA-mRNA) ENSMUSG00000032294
38375	false	-1	miRNA-mRNA	mmu-miR-125b-5p (miRNA-mRNA) ENSMUSG00000033105
38373	false	-1	miRNA-mRNA	mmu-miR-125b-5p (miRNA-mRNA) ENSMUSG00000032245
38364	false	-1	miRNA-mRNA	mmu-miR-125b-5p (miRNA-mRNA) ENSMUSG00000031903
30172	false	-1	TF-TG	ENSMUSG00000030717 (TF-TG) ENSMUSG00000005413
38356	false	-1	miRNA-mRNA	mmu-miR-125b-5p (miRNA-mRNA) ENSMUSG00000031668
38346	false	-1	miRNA-mRNA	mmu-miR-125b-5p (miRNA-mRNA) ENSMUSG00000028649
38344	false	-1	miRNA-mRNA	mmu-miR-125b-5p (miRNA-mRNA) ENSMUSG00000029772
38334	false	-1	miRNA-mRNA	mmu-miR-125b-5p (miRNA-mRNA) ENSMUSG00000029161
38333	false	-1	miRNA-mRNA	mmu-miR-125b-5p (miRNA-mRNA) ENSMUSG00000026509
38329	false	-1	miRNA-mRNA	mmu-miR-125b-5p (miRNA-mRNA) ENSMUSG00000026782
38327	false	-1	miRNA-mRNA	mmu-miR-125b-5p (miRNA-mRNA) ENSMUSG00000026604
38326	false	-1	miRNA-mRNA	mmu-miR-125b-5p (miRNA-mRNA) ENSMUSG00000026879
38325	false	-1	miRNA-mRNA	mmu-miR-125b-5p (miRNA-mRNA) ENSMUSG00000026605
38324	false	-1	miRNA-mRNA	mmu-miR-125b-5p (miRNA-mRNA) ENSMUSG00000027006
38321	false	-1	miRNA-mRNA	mmu-miR-125b-5p (miRNA-mRNA) ENSMUSG00000027883
38319	false	-1	miRNA-mRNA	mmu-miR-125b-5p (miRNA-mRNA) ENSMUSG00000028211
38317	false	-1	miRNA-mRNA	mmu-miR-125b-5p (miRNA-mRNA) ENSMUSG00000025959
38312	false	-1	miRNA-mRNA	mmu-miR-125b-5p (miRNA-mRNA) ENSMUSG00000024665
38311	false	-1	miRNA-mRNA	mmu-miR-125b-5p (miRNA-mRNA) ENSMUSG00000026103
38310	false	-1	miRNA-mRNA	mmu-miR-125b-5p (miRNA-mRNA) ENSMUSG00000026447
38302	false	-1	miRNA-mRNA	mmu-miR-125b-5p (miRNA-mRNA) ENSMUSG00000026072
38297	false	-1	miRNA-mRNA	mmu-miR-125b-5p (miRNA-mRNA) ENSMUSG00000025780
38293	false	-1	miRNA-mRNA	mmu-miR-125b-5p (miRNA-mRNA) ENSMUSG00000025790
38290	false	-1	miRNA-mRNA	mmu-miR-125b-5p (miRNA-mRNA) ENSMUSG00000022707
38287	false	-1	miRNA-mRNA	mmu-miR-125b-5p (miRNA-mRNA) ENSMUSG00000024066
38275	false	-1	miRNA-mRNA	mmu-miR-125b-5p (miRNA-mRNA) ENSMUSG00000022621
38269	false	-1	miRNA-mRNA	mmu-miR-125b-5p (miRNA-mRNA) ENSMUSG00000021364
38266	false	-1	miRNA-mRNA	mmu-miR-125b-5p (miRNA-mRNA) ENSMUSG00000022364
38264	false	-1	miRNA-mRNA	mmu-miR-125b-5p (miRNA-mRNA) ENSMUSG00000021838
38250	false	-1	miRNA-mRNA	mmu-miR-125b-5p (miRNA-mRNA) ENSMUSG00000020472
38248	false	-1	miRNA-mRNA	mmu-miR-125b-5p (miRNA-mRNA) ENSMUSG00000018411
38247	false	-1	miRNA-mRNA	mmu-miR-125b-5p (miRNA-mRNA) ENSMUSG00000020092
38244	false	-1	miRNA-mRNA	mmu-miR-125b-5p (miRNA-mRNA) ENSMUSG00000018983
38243	false	-1	miRNA-mRNA	mmu-miR-125b-5p (miRNA-mRNA) ENSMUSG00000018909
38241	false	-1	miRNA-mRNA	mmu-miR-125b-5p (miRNA-mRNA) ENSMUSG00000019564
38232	false	-1	miRNA-mRNA	mmu-miR-125b-5p (miRNA-mRNA) ENSMUSG00000006731
38228	false	-1	miRNA-mRNA	mmu-miR-125b-5p (miRNA-mRNA) ENSMUSG00000017446
38226	false	-1	miRNA-mRNA	mmu-miR-125b-5p (miRNA-mRNA) ENSMUSG00000013846
38223	false	-1	miRNA-mRNA	mmu-miR-125b-5p (miRNA-mRNA) ENSMUSG00000003134
38222	false	-1	miRNA-mRNA	mmu-miR-125b-5p (miRNA-mRNA) ENSMUSG00000000673
38221	false	-1	miRNA-mRNA	mmu-miR-125b-5p (miRNA-mRNA) ENSMUSG00000000555
38217	false	-1	miRNA-mRNA	mmu-miR-125b-5p (miRNA-mRNA) ENSMUSG00000005413
38216	false	-1	miRNA-mRNA	mmu-miR-125b-5p (miRNA-mRNA) ENSMUSG00000000056
38215	false	-1	miRNA-mRNA	mmu-miR-125b-5p (miRNA-mRNA) ENSMUSG00000001435
38214	false	-1	miRNA-mRNA	mmu-miR-125b-5p (miRNA-mRNA) ENSMUSG00000003541
21224	false	-1	TF-lincRNA	ENSMUSG00000027544 (TF-lincRNA) ENSMUSG00000099025
21223	false	-1	TF-lincRNA	ENSMUSG00000027544 (TF-lincRNA) ENSMUSG00000097932
21221	false	-1	TF-TG	ENSMUSG00000027544 (TF-TG) ENSMUSG00000096472
21219	false	-1	TF-TG	ENSMUSG00000027544 (TF-TG) ENSMUSG00000074282
21218	false	-1	TF-TG	ENSMUSG00000027544 (TF-TG) ENSMUSG00000074218
21216	false	-1	TF-TG	ENSMUSG00000027544 (TF-TG) ENSMUSG00000072949
21214	false	-1	TF-TG	ENSMUSG00000027544 (TF-TG) ENSMUSG00000072115
21213	false	-1	TF-TG	ENSMUSG00000027544 (TF-TG) ENSMUSG00000070407
21211	false	-1	TF-TG	ENSMUSG00000027544 (TF-TG) ENSMUSG00000069622
21210	false	-1	TF-TG	ENSMUSG00000027544 (TF-TG) ENSMUSG00000069515
21209	false	-1	TF-TG	ENSMUSG00000027544 (TF-TG) ENSMUSG00000069255
21206	false	-1	TF-TG	ENSMUSG00000027544 (TF-TG) ENSMUSG00000062078
21205	false	-1	TF-TG	ENSMUSG00000027544 (TF-TG) ENSMUSG00000061531
21204	false	-1	TF-TG	ENSMUSG00000027544 (TF-TG) ENSMUSG00000060962
21201	false	-1	TF-TG	ENSMUSG00000027544 (TF-TG) ENSMUSG00000054920
21199	false	-1	TF-TG	ENSMUSG00000027544 (TF-TG) ENSMUSG00000054422
21197	false	-1	TF-TG	ENSMUSG00000027544 (TF-TG) ENSMUSG00000054150
21196	false	-1	TF-TG	ENSMUSG00000027544 (TF-TG) ENSMUSG00000053862
21195	false	-1	TF-TG	ENSMUSG00000027544 (TF-TG) ENSMUSG00000053581
21194	false	-1	TF-TG	ENSMUSG00000027544 (TF-TG) ENSMUSG00000053470
21187	false	-1	TF-TG	ENSMUSG00000027544 (TF-TG) ENSMUSG00000048911
21186	false	-1	TF-TG	ENSMUSG00000027544 (TF-TG) ENSMUSG00000048440
21182	false	-1	TF-TG	ENSMUSG00000027544 (TF-TG) ENSMUSG00000046814
21180	false	-1	TF-TG	ENSMUSG00000027544 (TF-TG) ENSMUSG00000044456
21177	false	-1	TF-TG	ENSMUSG00000027544 (TF-TG) ENSMUSG00000043953
21174	false	-1	TF-TG	ENSMUSG00000027544 (TF-TG) ENSMUSG00000042303
21172	false	-1	TF-TG	ENSMUSG00000027544 (TF-TG) ENSMUSG00000041268
21170	false	-1	TF-TG	ENSMUSG00000027544 (TF-TG) ENSMUSG00000040640
21169	false	-1	TF-TG	ENSMUSG00000027544 (TF-TG) ENSMUSG00000040462
8881	false	-1	TF-miRNA	ENSMUSG00000022479 (TF-miRNA) mmu-miR-1945
21168	false	-1	TF-TG	ENSMUSG00000027544 (TF-TG) ENSMUSG00000040433
8877	false	-1	TF-lincRNA	ENSMUSG00000022479 (TF-lincRNA) ENSMUSG00000044522
8876	false	-1	TF-lincRNA	ENSMUSG00000022479 (TF-lincRNA) ENSMUSG00000085329
21163	false	-1	TF-TG	ENSMUSG00000027544 (TF-TG) ENSMUSG00000039158
21162	false	-1	TF-TG	ENSMUSG00000027544 (TF-TG) ENSMUSG00000038836
21161	false	-1	TF-TG	ENSMUSG00000027544 (TF-TG) ENSMUSG00000038451
8873	false	-1	TF-lincRNA	ENSMUSG00000022479 (TF-lincRNA) ENSMUSG00000075010
21160	false	-1	TF-TG	ENSMUSG00000027544 (TF-TG) ENSMUSG00000038175
8872	false	-1	TF-lincRNA	ENSMUSG00000022479 (TF-lincRNA) ENSMUSG00000102106
21158	false	-1	TF-TG	ENSMUSG00000027544 (TF-TG) ENSMUSG00000037447
21157	false	-1	TF-TG	ENSMUSG00000027544 (TF-TG) ENSMUSG00000036526
8867	false	-1	TF-lincRNA	ENSMUSG00000022479 (TF-lincRNA) ENSMUSG00000111528
21154	false	-1	TF-TG	ENSMUSG00000027544 (TF-TG) ENSMUSG00000035441
8866	false	-1	TF-lincRNA	ENSMUSG00000022479 (TF-lincRNA) ENSMUSG00000099025
21153	false	-1	TF-TG	ENSMUSG00000027544 (TF-TG) ENSMUSG00000035279
21152	false	-1	TF-TG	ENSMUSG00000027544 (TF-TG) ENSMUSG00000034858
8864	false	-1	TF-lincRNA	ENSMUSG00000022479 (TF-lincRNA) ENSMUSG00000109084
21151	false	-1	TF-TG	ENSMUSG00000027544 (TF-TG) ENSMUSG00000033530
21150	false	-1	TF-TG	ENSMUSG00000027544 (TF-TG) ENSMUSG00000032733
21148	false	-1	TF-TG	ENSMUSG00000027544 (TF-TG) ENSMUSG00000032656
21145	false	-1	TF-TG	ENSMUSG00000027544 (TF-TG) ENSMUSG00000032411
21143	false	-1	TF-TG	ENSMUSG00000027544 (TF-TG) ENSMUSG00000032245
8855	false	-1	TF-lincRNA	ENSMUSG00000022479 (TF-lincRNA) ENSMUSG00000097039
21141	false	-1	TF-TG	ENSMUSG00000027544 (TF-TG) ENSMUSG00000031980
8852	false	-1	TF-lincRNA	ENSMUSG00000022479 (TF-lincRNA) ENSMUSG00000097932
21138	false	-1	TF-TG	ENSMUSG00000027544 (TF-TG) ENSMUSG00000030772
21137	false	-1	TF-TG	ENSMUSG00000027544 (TF-TG) ENSMUSG00000030246
8848	false	-1	TF-lincRNA	ENSMUSG00000022479 (TF-lincRNA) ENSMUSG00000097277
21135	false	-1	TF-TG	ENSMUSG00000027544 (TF-TG) ENSMUSG00000029560
21134	false	-1	TF-TG	ENSMUSG00000027544 (TF-TG) ENSMUSG00000029330
8846	false	-1	TF-lincRNA	ENSMUSG00000022479 (TF-lincRNA) ENSMUSG00000097908
21133	false	-1	TF-TG	ENSMUSG00000027544 (TF-TG) ENSMUSG00000028614
8845	false	-1	TF-lincRNA	ENSMUSG00000022479 (TF-lincRNA) ENSMUSG00000097561
21131	false	-1	TF-TG	ENSMUSG00000027544 (TF-TG) ENSMUSG00000027995
21130	false	-1	TF-TG	ENSMUSG00000027544 (TF-TG) ENSMUSG00000027954
8842	false	-1	TF-lincRNA	ENSMUSG00000022479 (TF-lincRNA) ENSMUSG00000085183
21128	false	-1	TF-TG	ENSMUSG00000027544 (TF-TG) ENSMUSG00000026921
21127	false	-1	TF-TG	ENSMUSG00000027544 (TF-TG) ENSMUSG00000026880
21126	false	-1	TF-TG	ENSMUSG00000027544 (TF-TG) ENSMUSG00000026227
8838	false	-1	TF-lincRNA	ENSMUSG00000022479 (TF-lincRNA) ENSMUSG00000104011
21124	false	-1	TF-TG	ENSMUSG00000027544 (TF-TG) ENSMUSG00000025790
21123	false	-1	TF-TG	ENSMUSG00000027544 (TF-TG) ENSMUSG00000025477
21122	false	-1	TF-TG	ENSMUSG00000027544 (TF-TG) ENSMUSG00000024803
8833	false	-1	TF-TG	ENSMUSG00000022479 (TF-TG) ENSMUSG00000110266
21120	false	-1	TF-TG	ENSMUSG00000027544 (TF-TG) ENSMUSG00000024552
8832	false	-1	TF-TG	ENSMUSG00000022479 (TF-TG) ENSMUSG00000110086
21119	false	-1	TF-TG	ENSMUSG00000027544 (TF-TG) ENSMUSG00000024516
8831	false	-1	TF-TG	ENSMUSG00000022479 (TF-TG) ENSMUSG00000109946
8829	false	-1	TF-TG	ENSMUSG00000022479 (TF-TG) ENSMUSG00000108348
21116	false	-1	TF-TG	ENSMUSG00000027544 (TF-TG) ENSMUSG00000024066
8828	false	-1	TF-TG	ENSMUSG00000022479 (TF-TG) ENSMUSG00000098715
21113	false	-1	TF-TG	ENSMUSG00000027544 (TF-TG) ENSMUSG00000022900
8823	false	-1	TF-TG	ENSMUSG00000022479 (TF-TG) ENSMUSG00000096472
21110	false	-1	TF-TG	ENSMUSG00000027544 (TF-TG) ENSMUSG00000021947
21109	false	-1	TF-TG	ENSMUSG00000027544 (TF-TG) ENSMUSG00000021876
21108	false	-1	TF-TG	ENSMUSG00000027544 (TF-TG) ENSMUSG00000021822
8819	false	-1	TF-TG	ENSMUSG00000022479 (TF-TG) ENSMUSG00000095105
8818	false	-1	TF-TG	ENSMUSG00000022479 (TF-TG) ENSMUSG00000094928
21105	false	-1	TF-TG	ENSMUSG00000027544 (TF-TG) ENSMUSG00000021453
21104	false	-1	TF-TG	ENSMUSG00000027544 (TF-TG) ENSMUSG00000021196
21103	false	-1	TF-TG	ENSMUSG00000027544 (TF-TG) ENSMUSG00000021094
21102	false	-1	TF-TG	ENSMUSG00000027544 (TF-TG) ENSMUSG00000020978
21101	false	-1	TF-TG	ENSMUSG00000027544 (TF-TG) ENSMUSG00000020894
21099	false	-1	TF-TG	ENSMUSG00000027544 (TF-TG) ENSMUSG00000020741
8811	false	-1	TF-TG	ENSMUSG00000022479 (TF-TG) ENSMUSG00000094091
21097	false	-1	TF-TG	ENSMUSG00000027544 (TF-TG) ENSMUSG00000020277
21095	false	-1	TF-TG	ENSMUSG00000027544 (TF-TG) ENSMUSG00000017716
8807	false	-1	TF-TG	ENSMUSG00000022479 (TF-TG) ENSMUSG00000091813
21093	false	-1	TF-TG	ENSMUSG00000027544 (TF-TG) ENSMUSG00000014164
8804	false	-1	TF-TG	ENSMUSG00000022479 (TF-TG) ENSMUSG00000091387
21091	false	-1	TF-TG	ENSMUSG00000027544 (TF-TG) ENSMUSG00000012126
8802	false	-1	TF-TG	ENSMUSG00000022479 (TF-TG) ENSMUSG00000090891
21089	false	-1	TF-TG	ENSMUSG00000027544 (TF-TG) ENSMUSG00000011148
21088	false	-1	TF-TG	ENSMUSG00000027544 (TF-TG) ENSMUSG00000005413
21086	false	-1	TF-TG	ENSMUSG00000027544 (TF-TG) ENSMUSG00000003541
21082	false	-1	TF-TG	ENSMUSG00000027544 (TF-TG) ENSMUSG00000000732
21081	false	-1	TF-TG	ENSMUSG00000027544 (TF-TG) ENSMUSG00000000056
21080	false	-1	TF-lincRNA	ENSMUSG00000026398 (TF-lincRNA) ENSMUSG00000044522
8792	false	-1	TF-TG	ENSMUSG00000022479 (TF-TG) ENSMUSG00000081769
21079	false	-1	TF-lincRNA	ENSMUSG00000026398 (TF-lincRNA) ENSMUSG00000085329
21077	false	-1	TF-lincRNA	ENSMUSG00000026398 (TF-lincRNA) ENSMUSG00000102106
21076	false	-1	TF-lincRNA	ENSMUSG00000026398 (TF-lincRNA) ENSMUSG00000109084
8787	false	-1	TF-TG	ENSMUSG00000022479 (TF-TG) ENSMUSG00000079471
21069	false	-1	TF-TG	ENSMUSG00000026398 (TF-TG) ENSMUSG00000110086
8781	false	-1	TF-TG	ENSMUSG00000022479 (TF-TG) ENSMUSG00000079057
21066	false	-1	TF-TG	ENSMUSG00000026398 (TF-TG) ENSMUSG00000095105
21065	false	-1	TF-TG	ENSMUSG00000026398 (TF-TG) ENSMUSG00000094091
8777	false	-1	TF-TG	ENSMUSG00000022479 (TF-TG) ENSMUSG00000079037
21062	false	-1	TF-TG	ENSMUSG00000026398 (TF-TG) ENSMUSG00000079471
21061	false	-1	TF-TG	ENSMUSG00000026398 (TF-TG) ENSMUSG00000079057
8773	false	-1	TF-TG	ENSMUSG00000022479 (TF-TG) ENSMUSG00000078954
21059	false	-1	TF-TG	ENSMUSG00000026398 (TF-TG) ENSMUSG00000078650
21058	false	-1	TF-TG	ENSMUSG00000026398 (TF-TG) ENSMUSG00000078566
21057	false	-1	TF-TG	ENSMUSG00000026398 (TF-TG) ENSMUSG00000078515
8768	false	-1	TF-TG	ENSMUSG00000022479 (TF-TG) ENSMUSG00000078650
8767	false	-1	TF-TG	ENSMUSG00000022479 (TF-TG) ENSMUSG00000078566
8766	false	-1	TF-TG	ENSMUSG00000022479 (TF-TG) ENSMUSG00000078515
21053	false	-1	TF-TG	ENSMUSG00000026398 (TF-TG) ENSMUSG00000074476
21049	false	-1	TF-TG	ENSMUSG00000026398 (TF-TG) ENSMUSG00000072115
8760	false	-1	TF-TG	ENSMUSG00000022479 (TF-TG) ENSMUSG00000075702
21045	false	-1	TF-TG	ENSMUSG00000026398 (TF-TG) ENSMUSG00000070407
21044	false	-1	TF-TG	ENSMUSG00000026398 (TF-TG) ENSMUSG00000070332
8756	false	-1	TF-TG	ENSMUSG00000022479 (TF-TG) ENSMUSG00000075304
21043	false	-1	TF-TG	ENSMUSG00000026398 (TF-TG) ENSMUSG00000069114
21041	false	-1	TF-TG	ENSMUSG00000026398 (TF-TG) ENSMUSG00000068742
8749	false	-1	TF-TG	ENSMUSG00000022479 (TF-TG) ENSMUSG00000074796
21036	false	-1	TF-TG	ENSMUSG00000026398 (TF-TG) ENSMUSG00000066952
8747	false	-1	TF-TG	ENSMUSG00000022479 (TF-TG) ENSMUSG00000074715
21032	false	-1	TF-TG	ENSMUSG00000026398 (TF-TG) ENSMUSG00000064373
21030	false	-1	TF-TG	ENSMUSG00000026398 (TF-TG) ENSMUSG00000064215
8741	false	-1	TF-TG	ENSMUSG00000022479 (TF-TG) ENSMUSG00000074476
21028	false	-1	TF-TG	ENSMUSG00000026398 (TF-TG) ENSMUSG00000064140
21026	false	-1	TF-TG	ENSMUSG00000026398 (TF-TG) ENSMUSG00000063439
8738	false	-1	TF-TG	ENSMUSG00000022479 (TF-TG) ENSMUSG00000074282
8737	false	-1	TF-TG	ENSMUSG00000022479 (TF-TG) ENSMUSG00000074218
21023	false	-1	TF-TG	ENSMUSG00000026398 (TF-TG) ENSMUSG00000062070
21021	false	-1	TF-TG	ENSMUSG00000026398 (TF-TG) ENSMUSG00000061414
8733	false	-1	TF-TG	ENSMUSG00000022479 (TF-TG) ENSMUSG00000074183
8728	false	-1	TF-TG	ENSMUSG00000022479 (TF-TG) ENSMUSG00000072949
8727	false	-1	TF-TG	ENSMUSG00000022479 (TF-TG) ENSMUSG00000072946
21014	false	-1	TF-TG	ENSMUSG00000026398 (TF-TG) ENSMUSG00000059713
8725	false	-1	TF-TG	ENSMUSG00000022479 (TF-TG) ENSMUSG00000072849
21009	false	-1	TF-TG	ENSMUSG00000026398 (TF-TG) ENSMUSG00000059142
8720	false	-1	TF-TG	ENSMUSG00000022479 (TF-TG) ENSMUSG00000072115
21007	false	-1	TF-TG	ENSMUSG00000026398 (TF-TG) ENSMUSG00000058145
8719	false	-1	TF-TG	ENSMUSG00000022479 (TF-TG) ENSMUSG00000071847
21005	false	-1	TF-TG	ENSMUSG00000026398 (TF-TG) ENSMUSG00000056973
21004	false	-1	TF-TG	ENSMUSG00000026398 (TF-TG) ENSMUSG00000056602
21003	false	-1	TF-TG	ENSMUSG00000026398 (TF-TG) ENSMUSG00000055675
8715	false	-1	TF-TG	ENSMUSG00000022479 (TF-TG) ENSMUSG00000071537
20999	false	-1	TF-TG	ENSMUSG00000026398 (TF-TG) ENSMUSG00000054474
20997	false	-1	TF-TG	ENSMUSG00000026398 (TF-TG) ENSMUSG00000054150
8709	false	-1	TF-TG	ENSMUSG00000022479 (TF-TG) ENSMUSG00000070802
20996	false	-1	TF-TG	ENSMUSG00000026398 (TF-TG) ENSMUSG00000053862
8708	false	-1	TF-TG	ENSMUSG00000022479 (TF-TG) ENSMUSG00000070777
20995	false	-1	TF-TG	ENSMUSG00000026398 (TF-TG) ENSMUSG00000053846
20994	false	-1	TF-TG	ENSMUSG00000026398 (TF-TG) ENSMUSG00000053617
20993	false	-1	TF-TG	ENSMUSG00000026398 (TF-TG) ENSMUSG00000053216
8705	false	-1	TF-TG	ENSMUSG00000022479 (TF-TG) ENSMUSG00000070687
20990	false	-1	TF-TG	ENSMUSG00000026398 (TF-TG) ENSMUSG00000052131
8702	false	-1	TF-TG	ENSMUSG00000022479 (TF-TG) ENSMUSG00000070407
20989	false	-1	TF-TG	ENSMUSG00000026398 (TF-TG) ENSMUSG00000052105
20988	false	-1	TF-TG	ENSMUSG00000026398 (TF-TG) ENSMUSG00000051727
8700	false	-1	TF-TG	ENSMUSG00000022479 (TF-TG) ENSMUSG00000070332
8699	false	-1	TF-TG	ENSMUSG00000022479 (TF-TG) ENSMUSG00000070287
20985	false	-1	TF-TG	ENSMUSG00000026398 (TF-TG) ENSMUSG00000050777
20984	false	-1	TF-TG	ENSMUSG00000026398 (TF-TG) ENSMUSG00000050737
8694	false	-1	TF-TG	ENSMUSG00000022479 (TF-TG) ENSMUSG00000069622
8693	false	-1	TF-TG	ENSMUSG00000022479 (TF-TG) ENSMUSG00000069515
20980	false	-1	TF-TG	ENSMUSG00000026398 (TF-TG) ENSMUSG00000049154
8691	false	-1	TF-TG	ENSMUSG00000022479 (TF-TG) ENSMUSG00000069255
8690	false	-1	TF-TG	ENSMUSG00000022479 (TF-TG) ENSMUSG00000069170
20977	false	-1	TF-TG	ENSMUSG00000026398 (TF-TG) ENSMUSG00000048424
8689	false	-1	TF-TG	ENSMUSG00000022479 (TF-TG) ENSMUSG00000069114
20976	false	-1	TF-TG	ENSMUSG00000026398 (TF-TG) ENSMUSG00000048058
8687	false	-1	TF-TG	ENSMUSG00000022479 (TF-TG) ENSMUSG00000068877
20974	false	-1	TF-TG	ENSMUSG00000026398 (TF-TG) ENSMUSG00000047767
8685	false	-1	TF-TG	ENSMUSG00000022479 (TF-TG) ENSMUSG00000068742
20972	false	-1	TF-TG	ENSMUSG00000026398 (TF-TG) ENSMUSG00000047139
20970	false	-1	TF-TG	ENSMUSG00000026398 (TF-TG) ENSMUSG00000046688
8681	false	-1	TF-TG	ENSMUSG00000022479 (TF-TG) ENSMUSG00000068587
20967	false	-1	TF-TG	ENSMUSG00000026398 (TF-TG) ENSMUSG00000046546
20966	false	-1	TF-TG	ENSMUSG00000026398 (TF-TG) ENSMUSG00000046447
20965	false	-1	TF-TG	ENSMUSG00000026398 (TF-TG) ENSMUSG00000046223
20964	false	-1	TF-TG	ENSMUSG00000026398 (TF-TG) ENSMUSG00000046070
20963	false	-1	TF-TG	ENSMUSG00000026398 (TF-TG) ENSMUSG00000045667
8674	false	-1	TF-TG	ENSMUSG00000022479 (TF-TG) ENSMUSG00000067889
20961	false	-1	TF-TG	ENSMUSG00000026398 (TF-TG) ENSMUSG00000044646
20958	false	-1	TF-TG	ENSMUSG00000026398 (TF-TG) ENSMUSG00000043639
20957	false	-1	TF-TG	ENSMUSG00000026398 (TF-TG) ENSMUSG00000042797
20954	false	-1	TF-TG	ENSMUSG00000026398 (TF-TG) ENSMUSG00000042303
8666	false	-1	TF-TG	ENSMUSG00000022479 (TF-TG) ENSMUSG00000066952
20953	false	-1	TF-TG	ENSMUSG00000026398 (TF-TG) ENSMUSG00000042179
20952	false	-1	TF-TG	ENSMUSG00000026398 (TF-TG) ENSMUSG00000042035
20951	false	-1	TF-TG	ENSMUSG00000026398 (TF-TG) ENSMUSG00000041930
20949	false	-1	TF-TG	ENSMUSG00000026398 (TF-TG) ENSMUSG00000041733
20947	false	-1	TF-TG	ENSMUSG00000026398 (TF-TG) ENSMUSG00000041268
8658	false	-1	TF-TG	ENSMUSG00000022479 (TF-TG) ENSMUSG00000064373
20943	false	-1	TF-TG	ENSMUSG00000026398 (TF-TG) ENSMUSG00000041040
8655	false	-1	TF-TG	ENSMUSG00000022479 (TF-TG) ENSMUSG00000064262
20942	false	-1	TF-TG	ENSMUSG00000026398 (TF-TG) ENSMUSG00000040918
20941	false	-1	TF-TG	ENSMUSG00000026398 (TF-TG) ENSMUSG00000040631
20940	false	-1	TF-TG	ENSMUSG00000026398 (TF-TG) ENSMUSG00000040605
8652	false	-1	TF-TG	ENSMUSG00000022479 (TF-TG) ENSMUSG00000064215
8651	false	-1	TF-TG	ENSMUSG00000022479 (TF-TG) ENSMUSG00000064202
20938	false	-1	TF-TG	ENSMUSG00000026398 (TF-TG) ENSMUSG00000040433
8649	false	-1	TF-TG	ENSMUSG00000022479 (TF-TG) ENSMUSG00000064140
20936	false	-1	TF-TG	ENSMUSG00000026398 (TF-TG) ENSMUSG00000040127
8648	false	-1	TF-TG	ENSMUSG00000022479 (TF-TG) ENSMUSG00000064090
20934	false	-1	TF-TG	ENSMUSG00000026398 (TF-TG) ENSMUSG00000039934
20933	false	-1	TF-TG	ENSMUSG00000026398 (TF-TG) ENSMUSG00000039616
20932	false	-1	TF-TG	ENSMUSG00000026398 (TF-TG) ENSMUSG00000039323
8643	false	-1	TF-TG	ENSMUSG00000022479 (TF-TG) ENSMUSG00000063568
20929	false	-1	TF-TG	ENSMUSG00000026398 (TF-TG) ENSMUSG00000039050
8641	false	-1	TF-TG	ENSMUSG00000022479 (TF-TG) ENSMUSG00000063450
20928	false	-1	TF-TG	ENSMUSG00000026398 (TF-TG) ENSMUSG00000038903
8640	false	-1	TF-TG	ENSMUSG00000022479 (TF-TG) ENSMUSG00000063439
20927	false	-1	TF-TG	ENSMUSG00000026398 (TF-TG) ENSMUSG00000038745
8639	false	-1	TF-TG	ENSMUSG00000022479 (TF-TG) ENSMUSG00000063229
20926	false	-1	TF-TG	ENSMUSG00000026398 (TF-TG) ENSMUSG00000038422
20925	false	-1	TF-TG	ENSMUSG00000026398 (TF-TG) ENSMUSG00000038175
20924	false	-1	TF-TG	ENSMUSG00000026398 (TF-TG) ENSMUSG00000037936
20923	false	-1	TF-TG	ENSMUSG00000026398 (TF-TG) ENSMUSG00000037621
20922	false	-1	TF-TG	ENSMUSG00000026398 (TF-TG) ENSMUSG00000037583
20921	false	-1	TF-TG	ENSMUSG00000026398 (TF-TG) ENSMUSG00000037579
20918	false	-1	TF-TG	ENSMUSG00000026398 (TF-TG) ENSMUSG00000037169
8630	false	-1	TF-TG	ENSMUSG00000022479 (TF-TG) ENSMUSG00000062312
8629	false	-1	TF-TG	ENSMUSG00000022479 (TF-TG) ENSMUSG00000062248
20916	false	-1	TF-TG	ENSMUSG00000026398 (TF-TG) ENSMUSG00000036887
8628	false	-1	TF-TG	ENSMUSG00000022479 (TF-TG) ENSMUSG00000062078
20915	false	-1	TF-TG	ENSMUSG00000026398 (TF-TG) ENSMUSG00000036880
8627	false	-1	TF-TG	ENSMUSG00000022479 (TF-TG) ENSMUSG00000062070
20913	false	-1	TF-TG	ENSMUSG00000026398 (TF-TG) ENSMUSG00000036437
20912	false	-1	TF-TG	ENSMUSG00000026398 (TF-TG) ENSMUSG00000036216
8621	false	-1	TF-TG	ENSMUSG00000022479 (TF-TG) ENSMUSG00000061607
20908	false	-1	TF-TG	ENSMUSG00000026398 (TF-TG) ENSMUSG00000035683
8620	false	-1	TF-TG	ENSMUSG00000022479 (TF-TG) ENSMUSG00000061578
8619	false	-1	TF-TG	ENSMUSG00000022479 (TF-TG) ENSMUSG00000061531
20906	false	-1	TF-TG	ENSMUSG00000026398 (TF-TG) ENSMUSG00000035561
8618	false	-1	TF-TG	ENSMUSG00000022479 (TF-TG) ENSMUSG00000061414
8617	false	-1	TF-TG	ENSMUSG00000022479 (TF-TG) ENSMUSG00000060961
20903	false	-1	TF-TG	ENSMUSG00000026398 (TF-TG) ENSMUSG00000035441
20899	false	-1	TF-TG	ENSMUSG00000026398 (TF-TG) ENSMUSG00000034684
8610	false	-1	TF-TG	ENSMUSG00000022479 (TF-TG) ENSMUSG00000060550
8609	false	-1	TF-TG	ENSMUSG00000022479 (TF-TG) ENSMUSG00000060548
20895	false	-1	TF-TG	ENSMUSG00000026398 (TF-TG) ENSMUSG00000033917
20894	false	-1	TF-TG	ENSMUSG00000026398 (TF-TG) ENSMUSG00000033871
29083	false	-1	TF-TG	ENSMUSG00000026077 (TF-TG) ENSMUSG00000025037
20890	false	-1	TF-TG	ENSMUSG00000026398 (TF-TG) ENSMUSG00000033610
8602	false	-1	TF-TG	ENSMUSG00000022479 (TF-TG) ENSMUSG00000060176
20888	false	-1	TF-TG	ENSMUSG00000026398 (TF-TG) ENSMUSG00000033256
20887	false	-1	TF-TG	ENSMUSG00000026398 (TF-TG) ENSMUSG00000033107
20886	false	-1	TF-TG	ENSMUSG00000026398 (TF-TG) ENSMUSG00000032978
8598	false	-1	TF-TG	ENSMUSG00000022479 (TF-TG) ENSMUSG00000059824
20884	false	-1	TF-TG	ENSMUSG00000026398 (TF-TG) ENSMUSG00000032855
20883	false	-1	TF-TG	ENSMUSG00000026398 (TF-TG) ENSMUSG00000032849
20882	false	-1	TF-TG	ENSMUSG00000026398 (TF-TG) ENSMUSG00000032411
8593	false	-1	TF-TG	ENSMUSG00000022479 (TF-TG) ENSMUSG00000059540
20880	false	-1	TF-TG	ENSMUSG00000026398 (TF-TG) ENSMUSG00000032314
8592	false	-1	TF-TG	ENSMUSG00000022479 (TF-TG) ENSMUSG00000059493
20879	false	-1	TF-TG	ENSMUSG00000026398 (TF-TG) ENSMUSG00000032278
20876	false	-1	TF-TG	ENSMUSG00000026398 (TF-TG) ENSMUSG00000032018
8587	false	-1	TF-TG	ENSMUSG00000022479 (TF-TG) ENSMUSG00000059142
20874	false	-1	TF-TG	ENSMUSG00000026398 (TF-TG) ENSMUSG00000031980
20873	false	-1	TF-TG	ENSMUSG00000026398 (TF-TG) ENSMUSG00000031957
8583	false	-1	TF-TG	ENSMUSG00000022479 (TF-TG) ENSMUSG00000058794
20870	false	-1	TF-TG	ENSMUSG00000026398 (TF-TG) ENSMUSG00000031765
20869	false	-1	TF-TG	ENSMUSG00000026398 (TF-TG) ENSMUSG00000031725
8581	false	-1	TF-TG	ENSMUSG00000022479 (TF-TG) ENSMUSG00000058672
20868	false	-1	TF-TG	ENSMUSG00000026398 (TF-TG) ENSMUSG00000031668
20862	false	-1	TF-TG	ENSMUSG00000026398 (TF-TG) ENSMUSG00000030762
8574	false	-1	TF-TG	ENSMUSG00000022479 (TF-TG) ENSMUSG00000058216
20861	false	-1	TF-TG	ENSMUSG00000026398 (TF-TG) ENSMUSG00000030717
8573	false	-1	TF-TG	ENSMUSG00000022479 (TF-TG) ENSMUSG00000058145
20859	false	-1	TF-TG	ENSMUSG00000026398 (TF-TG) ENSMUSG00000030543
20857	false	-1	TF-TG	ENSMUSG00000026398 (TF-TG) ENSMUSG00000030246
20856	false	-1	TF-TG	ENSMUSG00000026398 (TF-TG) ENSMUSG00000029769
20854	false	-1	TF-TG	ENSMUSG00000026398 (TF-TG) ENSMUSG00000029522
20853	false	-1	TF-TG	ENSMUSG00000026398 (TF-TG) ENSMUSG00000029370
20852	false	-1	TF-TG	ENSMUSG00000026398 (TF-TG) ENSMUSG00000029343
20851	false	-1	TF-TG	ENSMUSG00000026398 (TF-TG) ENSMUSG00000029177
20850	false	-1	TF-TG	ENSMUSG00000026398 (TF-TG) ENSMUSG00000029173
8560	false	-1	TF-TG	ENSMUSG00000022479 (TF-TG) ENSMUSG00000057092
20847	false	-1	TF-TG	ENSMUSG00000026398 (TF-TG) ENSMUSG00000028874
8558	false	-1	TF-TG	ENSMUSG00000022479 (TF-TG) ENSMUSG00000056973
20844	false	-1	TF-TG	ENSMUSG00000026398 (TF-TG) ENSMUSG00000028542
8556	false	-1	TF-TG	ENSMUSG00000022479 (TF-TG) ENSMUSG00000056888
12650	false	-1	TF-TG	ENSMUSG00000037583 (TF-TG) ENSMUSG00000071226
8554	false	-1	TF-TG	ENSMUSG00000022479 (TF-TG) ENSMUSG00000056758
20841	false	-1	TF-TG	ENSMUSG00000026398 (TF-TG) ENSMUSG00000028415
12649	false	-1	TF-TG	ENSMUSG00000037583 (TF-TG) ENSMUSG00000053862
8553	false	-1	TF-TG	ENSMUSG00000022479 (TF-TG) ENSMUSG00000056737
12648	false	-1	TF-TG	ENSMUSG00000037583 (TF-TG) ENSMUSG00000042797
20839	false	-1	TF-TG	ENSMUSG00000026398 (TF-TG) ENSMUSG00000028211
12647	false	-1	TF-TG	ENSMUSG00000037583 (TF-TG) ENSMUSG00000042096
20838	false	-1	TF-TG	ENSMUSG00000026398 (TF-TG) ENSMUSG00000028186
12646	false	-1	TF-TG	ENSMUSG00000037583 (TF-TG) ENSMUSG00000038175
12644	false	-1	TF-TG	ENSMUSG00000037583 (TF-TG) ENSMUSG00000034858
8548	false	-1	TF-TG	ENSMUSG00000022479 (TF-TG) ENSMUSG00000056529
20835	false	-1	TF-TG	ENSMUSG00000026398 (TF-TG) ENSMUSG00000027954
20834	false	-1	TF-TG	ENSMUSG00000026398 (TF-TG) ENSMUSG00000027931
12642	false	-1	TF-TG	ENSMUSG00000037583 (TF-TG) ENSMUSG00000033105
8546	false	-1	TF-TG	ENSMUSG00000022479 (TF-TG) ENSMUSG00000056413
20833	false	-1	TF-TG	ENSMUSG00000026398 (TF-TG) ENSMUSG00000027890
20832	false	-1	TF-TG	ENSMUSG00000026398 (TF-TG) ENSMUSG00000027746
8544	false	-1	TF-TG	ENSMUSG00000022479 (TF-TG) ENSMUSG00000056069
20831	false	-1	TF-TG	ENSMUSG00000026398 (TF-TG) ENSMUSG00000027692
20830	false	-1	TF-TG	ENSMUSG00000026398 (TF-TG) ENSMUSG00000027534
20828	false	-1	TF-TG	ENSMUSG00000026398 (TF-TG) ENSMUSG00000027333
12636	false	-1	TF-TG	ENSMUSG00000037583 (TF-TG) ENSMUSG00000027931
20827	false	-1	TF-TG	ENSMUSG00000026398 (TF-TG) ENSMUSG00000027173
12635	false	-1	TF-TG	ENSMUSG00000037583 (TF-TG) ENSMUSG00000027746
12633	false	-1	TF-TG	ENSMUSG00000037583 (TF-TG) ENSMUSG00000026509
20824	false	-1	TF-TG	ENSMUSG00000026398 (TF-TG) ENSMUSG00000026980
12631	false	-1	TF-TG	ENSMUSG00000037583 (TF-TG) ENSMUSG00000026077
8535	false	-1	TF-TG	ENSMUSG00000022479 (TF-TG) ENSMUSG00000055675
20822	false	-1	TF-TG	ENSMUSG00000026398 (TF-TG) ENSMUSG00000026773
20821	false	-1	TF-TG	ENSMUSG00000026398 (TF-TG) ENSMUSG00000026764
8533	false	-1	TF-TG	ENSMUSG00000022479 (TF-TG) ENSMUSG00000055538
8532	false	-1	TF-TG	ENSMUSG00000022479 (TF-TG) ENSMUSG00000055493
12627	false	-1	TF-TG	ENSMUSG00000037583 (TF-TG) ENSMUSG00000022621
12626	false	-1	TF-TG	ENSMUSG00000037583 (TF-TG) ENSMUSG00000021838
12625	false	-1	TF-TG	ENSMUSG00000037583 (TF-TG) ENSMUSG00000020376
20816	false	-1	TF-TG	ENSMUSG00000026398 (TF-TG) ENSMUSG00000026227
8528	false	-1	TF-TG	ENSMUSG00000022479 (TF-TG) ENSMUSG00000055114
20815	false	-1	TF-TG	ENSMUSG00000026398 (TF-TG) ENSMUSG00000026107
12623	false	-1	TF-TG	ENSMUSG00000037583 (TF-TG) ENSMUSG00000026398
8527	false	-1	TF-TG	ENSMUSG00000022479 (TF-TG) ENSMUSG00000054967
20814	false	-1	TF-TG	ENSMUSG00000026398 (TF-TG) ENSMUSG00000026077
8526	false	-1	TF-TG	ENSMUSG00000022479 (TF-TG) ENSMUSG00000054958
8525	false	-1	TF-TG	ENSMUSG00000022479 (TF-TG) ENSMUSG00000054932
20812	false	-1	TF-TG	ENSMUSG00000026398 (TF-TG) ENSMUSG00000025790
8524	false	-1	TF-TG	ENSMUSG00000022479 (TF-TG) ENSMUSG00000054920
8523	false	-1	TF-TG	ENSMUSG00000022479 (TF-TG) ENSMUSG00000054893
8522	false	-1	TF-TG	ENSMUSG00000022479 (TF-TG) ENSMUSG00000054855
12616	false	-1	TF-miRNA	ENSMUSG00000017950 (TF-miRNA) mmu-miR-1945
20807	false	-1	TF-TG	ENSMUSG00000026398 (TF-TG) ENSMUSG00000025348
12614	false	-1	TF-lincRNA	ENSMUSG00000017950 (TF-lincRNA) ENSMUSG00000044522
12612	false	-1	TF-lincRNA	ENSMUSG00000017950 (TF-lincRNA) ENSMUSG00000075010
12610	false	-1	TF-lincRNA	ENSMUSG00000017950 (TF-lincRNA) ENSMUSG00000111528
12609	false	-1	TF-lincRNA	ENSMUSG00000017950 (TF-lincRNA) ENSMUSG00000109084
20800	false	-1	TF-TG	ENSMUSG00000026398 (TF-TG) ENSMUSG00000024803
8512	false	-1	TF-TG	ENSMUSG00000022479 (TF-TG) ENSMUSG00000054474
20799	false	-1	TF-TG	ENSMUSG00000026398 (TF-TG) ENSMUSG00000024774
20797	false	-1	TF-TG	ENSMUSG00000026398 (TF-TG) ENSMUSG00000024665
12605	false	-1	TF-lincRNA	ENSMUSG00000017950 (TF-lincRNA) ENSMUSG00000097277
20796	false	-1	TF-TG	ENSMUSG00000026398 (TF-TG) ENSMUSG00000024525
8508	false	-1	TF-TG	ENSMUSG00000022479 (TF-TG) ENSMUSG00000054422
12603	false	-1	TF-lincRNA	ENSMUSG00000017950 (TF-lincRNA) ENSMUSG00000097908
12602	false	-1	TF-lincRNA	ENSMUSG00000017950 (TF-lincRNA) ENSMUSG00000097561
8506	false	-1	TF-TG	ENSMUSG00000022479 (TF-TG) ENSMUSG00000054200
20793	false	-1	TF-TG	ENSMUSG00000026398 (TF-TG) ENSMUSG00000024349
8504	false	-1	TF-TG	ENSMUSG00000022479 (TF-TG) ENSMUSG00000054150
12599	false	-1	TF-lincRNA	ENSMUSG00000017950 (TF-lincRNA) ENSMUSG00000104011
8502	false	-1	TF-TG	ENSMUSG00000022479 (TF-TG) ENSMUSG00000053862
20789	false	-1	TF-TG	ENSMUSG00000026398 (TF-TG) ENSMUSG00000024013
12596	false	-1	TF-TG	ENSMUSG00000017950 (TF-TG) ENSMUSG00000110266
8500	false	-1	TF-TG	ENSMUSG00000022479 (TF-TG) ENSMUSG00000053846
12595	false	-1	TF-TG	ENSMUSG00000017950 (TF-TG) ENSMUSG00000110086
20786	false	-1	TF-TG	ENSMUSG00000026398 (TF-TG) ENSMUSG00000023122
12594	false	-1	TF-TG	ENSMUSG00000017950 (TF-TG) ENSMUSG00000109946
8497	false	-1	TF-TG	ENSMUSG00000022479 (TF-TG) ENSMUSG00000053765
20783	false	-1	TF-TG	ENSMUSG00000026398 (TF-TG) ENSMUSG00000022995
8495	false	-1	TF-TG	ENSMUSG00000022479 (TF-TG) ENSMUSG00000053617
8494	false	-1	TF-TG	ENSMUSG00000022479 (TF-TG) ENSMUSG00000053604
12589	false	-1	TF-TG	ENSMUSG00000017950 (TF-TG) ENSMUSG00000095105
8493	false	-1	TF-TG	ENSMUSG00000022479 (TF-TG) ENSMUSG00000053581
20780	false	-1	TF-TG	ENSMUSG00000026398 (TF-TG) ENSMUSG00000022629
8492	false	-1	TF-TG	ENSMUSG00000022479 (TF-TG) ENSMUSG00000053580
8491	false	-1	TF-TG	ENSMUSG00000022479 (TF-TG) ENSMUSG00000053470
8490	false	-1	TF-TG	ENSMUSG00000022479 (TF-TG) ENSMUSG00000053460
20777	false	-1	TF-TG	ENSMUSG00000026398 (TF-TG) ENSMUSG00000022546
8489	false	-1	TF-TG	ENSMUSG00000022479 (TF-TG) ENSMUSG00000053334
12584	false	-1	TF-TG	ENSMUSG00000017950 (TF-TG) ENSMUSG00000094091
12583	false	-1	TF-TG	ENSMUSG00000017950 (TF-TG) ENSMUSG00000091813
12582	false	-1	TF-TG	ENSMUSG00000017950 (TF-TG) ENSMUSG00000091387
8486	false	-1	TF-TG	ENSMUSG00000022479 (TF-TG) ENSMUSG00000053216
20773	false	-1	TF-TG	ENSMUSG00000026398 (TF-TG) ENSMUSG00000022364
20771	false	-1	TF-TG	ENSMUSG00000026398 (TF-TG) ENSMUSG00000022253
12579	false	-1	TF-TG	ENSMUSG00000017950 (TF-TG) ENSMUSG00000081769
8483	false	-1	TF-TG	ENSMUSG00000022479 (TF-TG) ENSMUSG00000053080
20769	false	-1	TF-TG	ENSMUSG00000026398 (TF-TG) ENSMUSG00000022208
20768	false	-1	TF-TG	ENSMUSG00000026398 (TF-TG) ENSMUSG00000022180
12576	false	-1	TF-TG	ENSMUSG00000017950 (TF-TG) ENSMUSG00000079471
20767	false	-1	TF-TG	ENSMUSG00000026398 (TF-TG) ENSMUSG00000022136
20766	false	-1	TF-TG	ENSMUSG00000026398 (TF-TG) ENSMUSG00000022094
12574	false	-1	TF-TG	ENSMUSG00000017950 (TF-TG) ENSMUSG00000079057
12573	false	-1	TF-TG	ENSMUSG00000017950 (TF-TG) ENSMUSG00000079037
20763	false	-1	TF-TG	ENSMUSG00000026398 (TF-TG) ENSMUSG00000021957
20761	false	-1	TF-TG	ENSMUSG00000026398 (TF-TG) ENSMUSG00000021876
12569	false	-1	TF-TG	ENSMUSG00000017950 (TF-TG) ENSMUSG00000078954
8473	false	-1	TF-TG	ENSMUSG00000022479 (TF-TG) ENSMUSG00000052584
20760	false	-1	TF-TG	ENSMUSG00000026398 (TF-TG) ENSMUSG00000021831
8472	false	-1	TF-TG	ENSMUSG00000022479 (TF-TG) ENSMUSG00000052560
12567	false	-1	TF-TG	ENSMUSG00000017950 (TF-TG) ENSMUSG00000078650
12566	false	-1	TF-TG	ENSMUSG00000017950 (TF-TG) ENSMUSG00000078515
20757	false	-1	TF-TG	ENSMUSG00000026398 (TF-TG) ENSMUSG00000021477
8469	false	-1	TF-TG	ENSMUSG00000022479 (TF-TG) ENSMUSG00000052384
8468	false	-1	TF-TG	ENSMUSG00000022479 (TF-TG) ENSMUSG00000052353
12561	false	-1	TF-TG	ENSMUSG00000017950 (TF-TG) ENSMUSG00000075702
8465	false	-1	TF-TG	ENSMUSG00000022479 (TF-TG) ENSMUSG00000052131
20752	false	-1	TF-TG	ENSMUSG00000026398 (TF-TG) ENSMUSG00000021094
8464	false	-1	TF-TG	ENSMUSG00000022479 (TF-TG) ENSMUSG00000052105
12558	false	-1	TF-TG	ENSMUSG00000017950 (TF-TG) ENSMUSG00000074715
20749	false	-1	TF-TG	ENSMUSG00000026398 (TF-TG) ENSMUSG00000020741
20747	false	-1	TF-TG	ENSMUSG00000026398 (TF-TG) ENSMUSG00000020715
12555	false	-1	TF-TG	ENSMUSG00000017950 (TF-TG) ENSMUSG00000074476
8458	false	-1	TF-TG	ENSMUSG00000022479 (TF-TG) ENSMUSG00000051727
20744	false	-1	TF-TG	ENSMUSG00000026398 (TF-TG) ENSMUSG00000020641
12552	false	-1	TF-TG	ENSMUSG00000017950 (TF-TG) ENSMUSG00000074218
20742	false	-1	TF-TG	ENSMUSG00000026398 (TF-TG) ENSMUSG00000020407
8454	false	-1	TF-TG	ENSMUSG00000022479 (TF-TG) ENSMUSG00000051498
12548	false	-1	TF-TG	ENSMUSG00000017950 (TF-TG) ENSMUSG00000074183
8452	false	-1	TF-TG	ENSMUSG00000022479 (TF-TG) ENSMUSG00000051343
20739	false	-1	TF-TG	ENSMUSG00000026398 (TF-TG) ENSMUSG00000020277
20737	false	-1	TF-TG	ENSMUSG00000026398 (TF-TG) ENSMUSG00000020009
8449	false	-1	TF-TG	ENSMUSG00000022479 (TF-TG) ENSMUSG00000051314
20736	false	-1	TF-TG	ENSMUSG00000026398 (TF-TG) ENSMUSG00000019945
12544	false	-1	TF-TG	ENSMUSG00000017950 (TF-TG) ENSMUSG00000072946
20735	false	-1	TF-TG	ENSMUSG00000026398 (TF-TG) ENSMUSG00000019942
12543	false	-1	TF-TG	ENSMUSG00000017950 (TF-TG) ENSMUSG00000072849
8447	false	-1	TF-TG	ENSMUSG00000022479 (TF-TG) ENSMUSG00000051185
20734	false	-1	TF-TG	ENSMUSG00000026398 (TF-TG) ENSMUSG00000018983
20733	false	-1	TF-TG	ENSMUSG00000026398 (TF-TG) ENSMUSG00000018909
20732	false	-1	TF-TG	ENSMUSG00000026398 (TF-TG) ENSMUSG00000018752
12538	false	-1	TF-TG	ENSMUSG00000017950 (TF-TG) ENSMUSG00000072115
20729	false	-1	TF-TG	ENSMUSG00000026398 (TF-TG) ENSMUSG00000018042
20727	false	-1	TF-TG	ENSMUSG00000026398 (TF-TG) ENSMUSG00000017692
12535	false	-1	TF-TG	ENSMUSG00000017950 (TF-TG) ENSMUSG00000071537
8439	false	-1	TF-TG	ENSMUSG00000022479 (TF-TG) ENSMUSG00000050777
20726	false	-1	TF-TG	ENSMUSG00000026398 (TF-TG) ENSMUSG00000017453
20725	false	-1	TF-TG	ENSMUSG00000026398 (TF-TG) ENSMUSG00000016541
12533	false	-1	TF-TG	ENSMUSG00000017950 (TF-TG) ENSMUSG00000071226
8437	false	-1	TF-TG	ENSMUSG00000022479 (TF-TG) ENSMUSG00000050737
8436	false	-1	TF-TG	ENSMUSG00000022479 (TF-TG) ENSMUSG00000050721
20723	false	-1	TF-TG	ENSMUSG00000026398 (TF-TG) ENSMUSG00000015850
20722	false	-1	TF-TG	ENSMUSG00000026398 (TF-TG) ENSMUSG00000015647
20721	false	-1	TF-TG	ENSMUSG00000026398 (TF-TG) ENSMUSG00000015112
12529	false	-1	TF-TG	ENSMUSG00000017950 (TF-TG) ENSMUSG00000070777
8433	false	-1	TF-TG	ENSMUSG00000022479 (TF-TG) ENSMUSG00000050592
20720	false	-1	TF-TG	ENSMUSG00000026398 (TF-TG) ENSMUSG00000014599
12527	false	-1	TF-TG	ENSMUSG00000017950 (TF-TG) ENSMUSG00000070687
20718	false	-1	TF-TG	ENSMUSG00000026398 (TF-TG) ENSMUSG00000014303
12524	false	-1	TF-TG	ENSMUSG00000017950 (TF-TG) ENSMUSG00000070332
8428	false	-1	TF-TG	ENSMUSG00000022479 (TF-TG) ENSMUSG00000050270
12523	false	-1	TF-TG	ENSMUSG00000017950 (TF-TG) ENSMUSG00000070287
8427	false	-1	TF-TG	ENSMUSG00000022479 (TF-TG) ENSMUSG00000050240
20713	false	-1	TF-TG	ENSMUSG00000026398 (TF-TG) ENSMUSG00000007207
8425	false	-1	TF-TG	ENSMUSG00000022479 (TF-TG) ENSMUSG00000050103
20712	false	-1	TF-TG	ENSMUSG00000026398 (TF-TG) ENSMUSG00000006800
12520	false	-1	TF-TG	ENSMUSG00000017950 (TF-TG) ENSMUSG00000069170
8424	false	-1	TF-TG	ENSMUSG00000022479 (TF-TG) ENSMUSG00000050064
12519	false	-1	TF-TG	ENSMUSG00000017950 (TF-TG) ENSMUSG00000069114
20710	false	-1	TF-TG	ENSMUSG00000026398 (TF-TG) ENSMUSG00000006731
12518	false	-1	TF-TG	ENSMUSG00000017950 (TF-TG) ENSMUSG00000068877
8422	false	-1	TF-TG	ENSMUSG00000022479 (TF-TG) ENSMUSG00000049878
20709	false	-1	TF-TG	ENSMUSG00000026398 (TF-TG) ENSMUSG00000006494
20708	false	-1	TF-TG	ENSMUSG00000026398 (TF-TG) ENSMUSG00000005873
12516	false	-1	TF-TG	ENSMUSG00000017950 (TF-TG) ENSMUSG00000068742
8420	false	-1	TF-TG	ENSMUSG00000022479 (TF-TG) ENSMUSG00000049858
20707	false	-1	TF-TG	ENSMUSG00000026398 (TF-TG) ENSMUSG00000005677
12514	false	-1	TF-TG	ENSMUSG00000017950 (TF-TG) ENSMUSG00000068587
20705	false	-1	TF-TG	ENSMUSG00000026398 (TF-TG) ENSMUSG00000005413
20704	false	-1	TF-TG	ENSMUSG00000026398 (TF-TG) ENSMUSG00000004951
8415	false	-1	TF-TG	ENSMUSG00000022479 (TF-TG) ENSMUSG00000049588
20702	false	-1	TF-TG	ENSMUSG00000026398 (TF-TG) ENSMUSG00000004270
8414	false	-1	TF-TG	ENSMUSG00000022479 (TF-TG) ENSMUSG00000049580
20698	false	-1	TF-TG	ENSMUSG00000026398 (TF-TG) ENSMUSG00000003134
8408	false	-1	TF-TG	ENSMUSG00000022479 (TF-TG) ENSMUSG00000049184
20695	false	-1	TF-TG	ENSMUSG00000026398 (TF-TG) ENSMUSG00000000791
12503	false	-1	TF-TG	ENSMUSG00000017950 (TF-TG) ENSMUSG00000064373
8407	false	-1	TF-TG	ENSMUSG00000022479 (TF-TG) ENSMUSG00000049154
20693	false	-1	TF-TG	ENSMUSG00000026398 (TF-TG) ENSMUSG00000000126
20692	false	-1	TF-TG	ENSMUSG00000026398 (TF-TG) ENSMUSG00000000056
12498	false	-1	TF-TG	ENSMUSG00000017950 (TF-TG) ENSMUSG00000064215
8401	false	-1	TF-TG	ENSMUSG00000022479 (TF-TG) ENSMUSG00000048911
12496	false	-1	TF-TG	ENSMUSG00000017950 (TF-TG) ENSMUSG00000064140
12493	false	-1	TF-TG	ENSMUSG00000017950 (TF-TG) ENSMUSG00000063568
12491	false	-1	TF-TG	ENSMUSG00000017950 (TF-TG) ENSMUSG00000063439
12490	false	-1	TF-TG	ENSMUSG00000017950 (TF-TG) ENSMUSG00000063229
8392	false	-1	TF-TG	ENSMUSG00000022479 (TF-TG) ENSMUSG00000048473
12487	false	-1	TF-TG	ENSMUSG00000017950 (TF-TG) ENSMUSG00000062312
8391	false	-1	TF-TG	ENSMUSG00000022479 (TF-TG) ENSMUSG00000048458
12486	false	-1	TF-TG	ENSMUSG00000017950 (TF-TG) ENSMUSG00000062248
12485	false	-1	TF-TG	ENSMUSG00000017950 (TF-TG) ENSMUSG00000062070
8389	false	-1	TF-TG	ENSMUSG00000022479 (TF-TG) ENSMUSG00000048440
8388	false	-1	TF-TG	ENSMUSG00000022479 (TF-TG) ENSMUSG00000048424
8387	false	-1	TF-TG	ENSMUSG00000022479 (TF-TG) ENSMUSG00000048376
12481	false	-1	TF-TG	ENSMUSG00000017950 (TF-TG) ENSMUSG00000061578
12480	false	-1	TF-TG	ENSMUSG00000017950 (TF-TG) ENSMUSG00000061414
8384	false	-1	TF-TG	ENSMUSG00000022479 (TF-TG) ENSMUSG00000048279
8383	false	-1	TF-TG	ENSMUSG00000022479 (TF-TG) ENSMUSG00000048232
8382	false	-1	TF-TG	ENSMUSG00000022479 (TF-TG) ENSMUSG00000048217
12477	false	-1	TF-TG	ENSMUSG00000017950 (TF-TG) ENSMUSG00000060550
12476	false	-1	TF-TG	ENSMUSG00000017950 (TF-TG) ENSMUSG00000060548
12474	false	-1	TF-TG	ENSMUSG00000017950 (TF-TG) ENSMUSG00000060176
8377	false	-1	TF-TG	ENSMUSG00000022479 (TF-TG) ENSMUSG00000048058
12472	false	-1	TF-TG	ENSMUSG00000017950 (TF-TG) ENSMUSG00000059713
8373	false	-1	TF-TG	ENSMUSG00000022479 (TF-TG) ENSMUSG00000047976
12468	false	-1	TF-TG	ENSMUSG00000017950 (TF-TG) ENSMUSG00000059142
8372	false	-1	TF-TG	ENSMUSG00000022479 (TF-TG) ENSMUSG00000047963
12466	false	-1	TF-TG	ENSMUSG00000017950 (TF-TG) ENSMUSG00000058794
12465	false	-1	TF-TG	ENSMUSG00000017950 (TF-TG) ENSMUSG00000058672
8367	false	-1	TF-TG	ENSMUSG00000022479 (TF-TG) ENSMUSG00000047797
8366	false	-1	TF-TG	ENSMUSG00000022479 (TF-TG) ENSMUSG00000047767
12461	false	-1	TF-TG	ENSMUSG00000017950 (TF-TG) ENSMUSG00000058216
12453	false	-1	TF-TG	ENSMUSG00000017950 (TF-TG) ENSMUSG00000057092
12451	false	-1	TF-TG	ENSMUSG00000017950 (TF-TG) ENSMUSG00000056973
8355	false	-1	TF-TG	ENSMUSG00000022479 (TF-TG) ENSMUSG00000047501
12449	false	-1	TF-TG	ENSMUSG00000017950 (TF-TG) ENSMUSG00000056888
12448	false	-1	TF-TG	ENSMUSG00000017950 (TF-TG) ENSMUSG00000056758
12447	false	-1	TF-TG	ENSMUSG00000017950 (TF-TG) ENSMUSG00000056737
24734	false	-1	TF-lincRNA	ENSMUSG00000025025 (TF-lincRNA) ENSMUSG00000109084
8350	false	-1	TF-TG	ENSMUSG00000022479 (TF-TG) ENSMUSG00000047139
24732	false	-1	TF-lincRNA	ENSMUSG00000025025 (TF-lincRNA) ENSMUSG00000097039
12444	false	-1	TF-TG	ENSMUSG00000017950 (TF-TG) ENSMUSG00000056413
8348	false	-1	TF-TG	ENSMUSG00000022479 (TF-TG) ENSMUSG00000046841
24731	false	-1	TF-lincRNA	ENSMUSG00000025025 (TF-lincRNA) ENSMUSG00000097287
8347	false	-1	TF-TG	ENSMUSG00000022479 (TF-TG) ENSMUSG00000046814
24729	false	-1	TF-TG	ENSMUSG00000025025 (TF-TG) ENSMUSG00000110266
24728	false	-1	TF-TG	ENSMUSG00000025025 (TF-TG) ENSMUSG00000108348
8344	false	-1	TF-TG	ENSMUSG00000022479 (TF-TG) ENSMUSG00000046688
24727	false	-1	TF-TG	ENSMUSG00000025025 (TF-TG) ENSMUSG00000098715
12438	false	-1	TF-TG	ENSMUSG00000017950 (TF-TG) ENSMUSG00000055675
24725	false	-1	TF-TG	ENSMUSG00000025025 (TF-TG) ENSMUSG00000094928
12436	false	-1	TF-TG	ENSMUSG00000017950 (TF-TG) ENSMUSG00000055538
24723	false	-1	TF-TG	ENSMUSG00000025025 (TF-TG) ENSMUSG00000094091
12435	false	-1	TF-TG	ENSMUSG00000017950 (TF-TG) ENSMUSG00000055114
12433	false	-1	TF-TG	ENSMUSG00000017950 (TF-TG) ENSMUSG00000054967
8337	false	-1	TF-TG	ENSMUSG00000022479 (TF-TG) ENSMUSG00000046546
24720	false	-1	TF-TG	ENSMUSG00000025025 (TF-TG) ENSMUSG00000079057
12432	false	-1	TF-TG	ENSMUSG00000017950 (TF-TG) ENSMUSG00000054958
8336	false	-1	TF-TG	ENSMUSG00000022479 (TF-TG) ENSMUSG00000046447
24719	false	-1	TF-TG	ENSMUSG00000025025 (TF-TG) ENSMUSG00000079037
12431	false	-1	TF-TG	ENSMUSG00000017950 (TF-TG) ENSMUSG00000054932
24718	false	-1	TF-TG	ENSMUSG00000025025 (TF-TG) ENSMUSG00000078650
12430	false	-1	TF-TG	ENSMUSG00000017950 (TF-TG) ENSMUSG00000054920
24717	false	-1	TF-TG	ENSMUSG00000025025 (TF-TG) ENSMUSG00000078566
12429	false	-1	TF-TG	ENSMUSG00000017950 (TF-TG) ENSMUSG00000054855
8332	false	-1	TF-TG	ENSMUSG00000022479 (TF-TG) ENSMUSG00000046295
8331	false	-1	TF-TG	ENSMUSG00000022479 (TF-TG) ENSMUSG00000046242
8330	false	-1	TF-TG	ENSMUSG00000022479 (TF-TG) ENSMUSG00000046223
24712	false	-1	TF-TG	ENSMUSG00000025025 (TF-TG) ENSMUSG00000075702
8326	false	-1	TF-TG	ENSMUSG00000022479 (TF-TG) ENSMUSG00000046093
24709	false	-1	TF-TG	ENSMUSG00000025025 (TF-TG) ENSMUSG00000074282
8325	false	-1	TF-TG	ENSMUSG00000022479 (TF-TG) ENSMUSG00000046070
12420	false	-1	TF-TG	ENSMUSG00000017950 (TF-TG) ENSMUSG00000054474
24706	false	-1	TF-TG	ENSMUSG00000025025 (TF-TG) ENSMUSG00000072115
24705	false	-1	TF-TG	ENSMUSG00000025025 (TF-TG) ENSMUSG00000071226
12417	false	-1	TF-TG	ENSMUSG00000017950 (TF-TG) ENSMUSG00000054422
12416	false	-1	TF-TG	ENSMUSG00000017950 (TF-TG) ENSMUSG00000054200
8320	false	-1	TF-TG	ENSMUSG00000022479 (TF-TG) ENSMUSG00000045667
12415	false	-1	TF-TG	ENSMUSG00000017950 (TF-TG) ENSMUSG00000054150
8319	false	-1	TF-TG	ENSMUSG00000022479 (TF-TG) ENSMUSG00000045629
24702	false	-1	TF-TG	ENSMUSG00000025025 (TF-TG) ENSMUSG00000069114
12413	false	-1	TF-TG	ENSMUSG00000017950 (TF-TG) ENSMUSG00000053862
8317	false	-1	TF-TG	ENSMUSG00000022479 (TF-TG) ENSMUSG00000045382
24700	false	-1	TF-TG	ENSMUSG00000025025 (TF-TG) ENSMUSG00000068742
12412	false	-1	TF-TG	ENSMUSG00000017950 (TF-TG) ENSMUSG00000053846
24699	false	-1	TF-TG	ENSMUSG00000025025 (TF-TG) ENSMUSG00000068154
12409	false	-1	TF-TG	ENSMUSG00000017950 (TF-TG) ENSMUSG00000053617
12408	false	-1	TF-TG	ENSMUSG00000017950 (TF-TG) ENSMUSG00000053604
8312	false	-1	TF-TG	ENSMUSG00000022479 (TF-TG) ENSMUSG00000045094
24695	false	-1	TF-TG	ENSMUSG00000025025 (TF-TG) ENSMUSG00000064215
12407	false	-1	TF-TG	ENSMUSG00000017950 (TF-TG) ENSMUSG00000053580
24694	false	-1	TF-TG	ENSMUSG00000025025 (TF-TG) ENSMUSG00000064140
12406	false	-1	TF-TG	ENSMUSG00000017950 (TF-TG) ENSMUSG00000053470
24693	false	-1	TF-TG	ENSMUSG00000025025 (TF-TG) ENSMUSG00000063229
12405	false	-1	TF-TG	ENSMUSG00000017950 (TF-TG) ENSMUSG00000053334
8309	false	-1	TF-TG	ENSMUSG00000022479 (TF-TG) ENSMUSG00000045007
24692	false	-1	TF-TG	ENSMUSG00000025025 (TF-TG) ENSMUSG00000062078
12403	false	-1	TF-TG	ENSMUSG00000017950 (TF-TG) ENSMUSG00000053216
8305	false	-1	TF-TG	ENSMUSG00000022479 (TF-TG) ENSMUSG00000044674
24688	false	-1	TF-TG	ENSMUSG00000025025 (TF-TG) ENSMUSG00000059824
8304	false	-1	TF-TG	ENSMUSG00000022479 (TF-TG) ENSMUSG00000044646
24687	false	-1	TF-TG	ENSMUSG00000025025 (TF-TG) ENSMUSG00000059713
12399	false	-1	TF-TG	ENSMUSG00000017950 (TF-TG) ENSMUSG00000052584
24686	false	-1	TF-TG	ENSMUSG00000025025 (TF-TG) ENSMUSG00000059540
12398	false	-1	TF-TG	ENSMUSG00000017950 (TF-TG) ENSMUSG00000052560
8302	false	-1	TF-TG	ENSMUSG00000022479 (TF-TG) ENSMUSG00000044456
24683	false	-1	TF-TG	ENSMUSG00000025025 (TF-TG) ENSMUSG00000058672
12395	false	-1	TF-TG	ENSMUSG00000017950 (TF-TG) ENSMUSG00000052384
12394	false	-1	TF-TG	ENSMUSG00000017950 (TF-TG) ENSMUSG00000052353
8298	false	-1	TF-TG	ENSMUSG00000022479 (TF-TG) ENSMUSG00000044254
24681	false	-1	TF-TG	ENSMUSG00000025025 (TF-TG) ENSMUSG00000058145
12392	false	-1	TF-TG	ENSMUSG00000017950 (TF-TG) ENSMUSG00000052131
12391	false	-1	TF-TG	ENSMUSG00000017950 (TF-TG) ENSMUSG00000052105
8295	false	-1	TF-TG	ENSMUSG00000022479 (TF-TG) ENSMUSG00000044072
24678	false	-1	TF-TG	ENSMUSG00000025025 (TF-TG) ENSMUSG00000056737
12389	false	-1	TF-TG	ENSMUSG00000017950 (TF-TG) ENSMUSG00000051727
24676	false	-1	TF-TG	ENSMUSG00000025025 (TF-TG) ENSMUSG00000056602
8291	false	-1	TF-TG	ENSMUSG00000022479 (TF-TG) ENSMUSG00000043953
24674	false	-1	TF-TG	ENSMUSG00000025025 (TF-TG) ENSMUSG00000056413
12386	false	-1	TF-TG	ENSMUSG00000017950 (TF-TG) ENSMUSG00000051498
24672	false	-1	TF-TG	ENSMUSG00000025025 (TF-TG) ENSMUSG00000054967
12384	false	-1	TF-TG	ENSMUSG00000017950 (TF-TG) ENSMUSG00000051343
8288	false	-1	TF-TG	ENSMUSG00000022479 (TF-TG) ENSMUSG00000043639
24671	false	-1	TF-TG	ENSMUSG00000025025 (TF-TG) ENSMUSG00000054920
24670	false	-1	TF-TG	ENSMUSG00000025025 (TF-TG) ENSMUSG00000054893
12382	false	-1	TF-TG	ENSMUSG00000017950 (TF-TG) ENSMUSG00000051314
12381	false	-1	TF-TG	ENSMUSG00000017950 (TF-TG) ENSMUSG00000050777
24668	false	-1	TF-TG	ENSMUSG00000025025 (TF-TG) ENSMUSG00000054150
12380	false	-1	TF-TG	ENSMUSG00000017950 (TF-TG) ENSMUSG00000050721
24667	false	-1	TF-TG	ENSMUSG00000025025 (TF-TG) ENSMUSG00000053846
8283	false	-1	TF-TG	ENSMUSG00000022479 (TF-TG) ENSMUSG00000043391
24665	false	-1	TF-TG	ENSMUSG00000025025 (TF-TG) ENSMUSG00000053460
8281	false	-1	TF-TG	ENSMUSG00000022479 (TF-TG) ENSMUSG00000043004
12375	false	-1	TF-TG	ENSMUSG00000017950 (TF-TG) ENSMUSG00000050270
12374	false	-1	TF-TG	ENSMUSG00000017950 (TF-TG) ENSMUSG00000050240
12373	false	-1	TF-TG	ENSMUSG00000017950 (TF-TG) ENSMUSG00000050103
12372	false	-1	TF-TG	ENSMUSG00000017950 (TF-TG) ENSMUSG00000050064
8275	false	-1	TF-TG	ENSMUSG00000022479 (TF-TG) ENSMUSG00000042797
24658	false	-1	TF-TG	ENSMUSG00000025025 (TF-TG) ENSMUSG00000051343
12370	false	-1	TF-TG	ENSMUSG00000017950 (TF-TG) ENSMUSG00000049858
24657	false	-1	TF-TG	ENSMUSG00000025025 (TF-TG) ENSMUSG00000050721
12368	false	-1	TF-TG	ENSMUSG00000017950 (TF-TG) ENSMUSG00000049588
24653	false	-1	TF-TG	ENSMUSG00000025025 (TF-TG) ENSMUSG00000050270
12365	false	-1	TF-TG	ENSMUSG00000017950 (TF-TG) ENSMUSG00000048911
8268	false	-1	TF-TG	ENSMUSG00000022479 (TF-TG) ENSMUSG00000042647
24651	false	-1	TF-TG	ENSMUSG00000025025 (TF-TG) ENSMUSG00000049878
12363	false	-1	TF-TG	ENSMUSG00000017950 (TF-TG) ENSMUSG00000048440
12362	false	-1	TF-TG	ENSMUSG00000017950 (TF-TG) ENSMUSG00000048424
24649	false	-1	TF-TG	ENSMUSG00000025025 (TF-TG) ENSMUSG00000049858
12361	false	-1	TF-TG	ENSMUSG00000017950 (TF-TG) ENSMUSG00000048217
12360	false	-1	TF-TG	ENSMUSG00000017950 (TF-TG) ENSMUSG00000048058
24647	false	-1	TF-TG	ENSMUSG00000025025 (TF-TG) ENSMUSG00000049154
12358	false	-1	TF-TG	ENSMUSG00000017950 (TF-TG) ENSMUSG00000047907
12356	false	-1	TF-TG	ENSMUSG00000017950 (TF-TG) ENSMUSG00000047797
24642	false	-1	TF-TG	ENSMUSG00000025025 (TF-TG) ENSMUSG00000048440
12354	false	-1	TF-TG	ENSMUSG00000017950 (TF-TG) ENSMUSG00000047501
8258	false	-1	TF-TG	ENSMUSG00000022479 (TF-TG) ENSMUSG00000042333
24641	false	-1	TF-TG	ENSMUSG00000025025 (TF-TG) ENSMUSG00000048376
24640	false	-1	TF-TG	ENSMUSG00000025025 (TF-TG) ENSMUSG00000048232
12352	false	-1	TF-TG	ENSMUSG00000017950 (TF-TG) ENSMUSG00000047139
8256	false	-1	TF-TG	ENSMUSG00000022479 (TF-TG) ENSMUSG00000042303
24639	false	-1	TF-TG	ENSMUSG00000025025 (TF-TG) ENSMUSG00000048217
12351	false	-1	TF-TG	ENSMUSG00000017950 (TF-TG) ENSMUSG00000046814
8254	false	-1	TF-TG	ENSMUSG00000022479 (TF-TG) ENSMUSG00000042258
8252	false	-1	TF-TG	ENSMUSG00000022479 (TF-TG) ENSMUSG00000042195
24635	false	-1	TF-TG	ENSMUSG00000025025 (TF-TG) ENSMUSG00000047963
12347	false	-1	TF-TG	ENSMUSG00000017950 (TF-TG) ENSMUSG00000046688
8251	false	-1	TF-TG	ENSMUSG00000022479 (TF-TG) ENSMUSG00000042179
8249	false	-1	TF-TG	ENSMUSG00000022479 (TF-TG) ENSMUSG00000042115
12344	false	-1	TF-TG	ENSMUSG00000017950 (TF-TG) ENSMUSG00000046546
8248	false	-1	TF-TG	ENSMUSG00000022479 (TF-TG) ENSMUSG00000042109
12343	false	-1	TF-TG	ENSMUSG00000017950 (TF-TG) ENSMUSG00000046447
8247	false	-1	TF-TG	ENSMUSG00000022479 (TF-TG) ENSMUSG00000042096
24628	false	-1	TF-TG	ENSMUSG00000025025 (TF-TG) ENSMUSG00000047139
8244	false	-1	TF-TG	ENSMUSG00000022479 (TF-TG) ENSMUSG00000042035
24627	false	-1	TF-TG	ENSMUSG00000025025 (TF-TG) ENSMUSG00000046814
12339	false	-1	TF-TG	ENSMUSG00000017950 (TF-TG) ENSMUSG00000046070
24625	false	-1	TF-TG	ENSMUSG00000025025 (TF-TG) ENSMUSG00000046546
12337	false	-1	TF-TG	ENSMUSG00000017950 (TF-TG) ENSMUSG00000045667
12336	false	-1	TF-TG	ENSMUSG00000017950 (TF-TG) ENSMUSG00000045629
8240	false	-1	TF-TG	ENSMUSG00000022479 (TF-TG) ENSMUSG00000041930
24623	false	-1	TF-TG	ENSMUSG00000025025 (TF-TG) ENSMUSG00000046295
12335	false	-1	TF-TG	ENSMUSG00000017950 (TF-TG) ENSMUSG00000045382
24622	false	-1	TF-TG	ENSMUSG00000025025 (TF-TG) ENSMUSG00000046070
24621	false	-1	TF-TG	ENSMUSG00000025025 (TF-TG) ENSMUSG00000046058
12333	false	-1	TF-TG	ENSMUSG00000017950 (TF-TG) ENSMUSG00000045094
24619	false	-1	TF-TG	ENSMUSG00000025025 (TF-TG) ENSMUSG00000045382
12330	false	-1	TF-TG	ENSMUSG00000017950 (TF-TG) ENSMUSG00000045007
24617	false	-1	TF-TG	ENSMUSG00000025025 (TF-TG) ENSMUSG00000045349
8233	false	-1	TF-TG	ENSMUSG00000022479 (TF-TG) ENSMUSG00000041733
12326	false	-1	TF-TG	ENSMUSG00000017950 (TF-TG) ENSMUSG00000044674
12325	false	-1	TF-TG	ENSMUSG00000017950 (TF-TG) ENSMUSG00000044646
24612	false	-1	TF-TG	ENSMUSG00000025025 (TF-TG) ENSMUSG00000044072
12324	false	-1	TF-TG	ENSMUSG00000017950 (TF-TG) ENSMUSG00000044456
12323	false	-1	TF-TG	ENSMUSG00000017950 (TF-TG) ENSMUSG00000044072
8226	false	-1	TF-TG	ENSMUSG00000022479 (TF-TG) ENSMUSG00000041548
24608	false	-1	TF-TG	ENSMUSG00000025025 (TF-TG) ENSMUSG00000043004
8224	false	-1	TF-TG	ENSMUSG00000022479 (TF-TG) ENSMUSG00000041431
24607	false	-1	TF-TG	ENSMUSG00000025025 (TF-TG) ENSMUSG00000042797
24606	false	-1	TF-TG	ENSMUSG00000025025 (TF-TG) ENSMUSG00000042647
8221	false	-1	TF-TG	ENSMUSG00000022479 (TF-TG) ENSMUSG00000041237
12316	false	-1	TF-TG	ENSMUSG00000017950 (TF-TG) ENSMUSG00000043068
8220	false	-1	TF-TG	ENSMUSG00000022479 (TF-TG) ENSMUSG00000041219
8219	false	-1	TF-TG	ENSMUSG00000022479 (TF-TG) ENSMUSG00000041202
12314	false	-1	TF-TG	ENSMUSG00000017950 (TF-TG) ENSMUSG00000042797
24601	false	-1	TF-TG	ENSMUSG00000025025 (TF-TG) ENSMUSG00000041930
12313	false	-1	TF-TG	ENSMUSG00000017950 (TF-TG) ENSMUSG00000042647
24600	false	-1	TF-TG	ENSMUSG00000025025 (TF-TG) ENSMUSG00000041733
12309	false	-1	TF-TG	ENSMUSG00000017950 (TF-TG) ENSMUSG00000042333
24596	false	-1	TF-TG	ENSMUSG00000025025 (TF-TG) ENSMUSG00000041431
12308	false	-1	TF-TG	ENSMUSG00000017950 (TF-TG) ENSMUSG00000042303
24595	false	-1	TF-TG	ENSMUSG00000025025 (TF-TG) ENSMUSG00000041268
24594	false	-1	TF-TG	ENSMUSG00000025025 (TF-TG) ENSMUSG00000041237
12306	false	-1	TF-TG	ENSMUSG00000017950 (TF-TG) ENSMUSG00000042195
8210	false	-1	TF-TG	ENSMUSG00000022479 (TF-TG) ENSMUSG00000041064
24593	false	-1	TF-TG	ENSMUSG00000025025 (TF-TG) ENSMUSG00000041219
12305	false	-1	TF-TG	ENSMUSG00000017950 (TF-TG) ENSMUSG00000042179
8209	false	-1	TF-TG	ENSMUSG00000022479 (TF-TG) ENSMUSG00000041058
12304	false	-1	TF-TG	ENSMUSG00000017950 (TF-TG) ENSMUSG00000042115
8208	false	-1	TF-TG	ENSMUSG00000022479 (TF-TG) ENSMUSG00000041040
12303	false	-1	TF-TG	ENSMUSG00000017950 (TF-TG) ENSMUSG00000042109
8206	false	-1	TF-TG	ENSMUSG00000022479 (TF-TG) ENSMUSG00000040998
24589	false	-1	TF-TG	ENSMUSG00000025025 (TF-TG) ENSMUSG00000041064
8204	false	-1	TF-TG	ENSMUSG00000022479 (TF-TG) ENSMUSG00000040918
24587	false	-1	TF-TG	ENSMUSG00000025025 (TF-TG) ENSMUSG00000041058
8203	false	-1	TF-TG	ENSMUSG00000022479 (TF-TG) ENSMUSG00000040852
24586	false	-1	TF-TG	ENSMUSG00000025025 (TF-TG) ENSMUSG00000041040
12297	false	-1	TF-TG	ENSMUSG00000017950 (TF-TG) ENSMUSG00000041930
24584	false	-1	TF-TG	ENSMUSG00000025025 (TF-TG) ENSMUSG00000040631
24582	false	-1	TF-TG	ENSMUSG00000025025 (TF-TG) ENSMUSG00000040447
8198	false	-1	TF-TG	ENSMUSG00000022479 (TF-TG) ENSMUSG00000040640
24581	false	-1	TF-TG	ENSMUSG00000025025 (TF-TG) ENSMUSG00000040433
8197	false	-1	TF-TG	ENSMUSG00000022479 (TF-TG) ENSMUSG00000040631
24580	false	-1	TF-TG	ENSMUSG00000025025 (TF-TG) ENSMUSG00000040430
12291	false	-1	TF-TG	ENSMUSG00000017950 (TF-TG) ENSMUSG00000041548
8195	false	-1	TF-TG	ENSMUSG00000022479 (TF-TG) ENSMUSG00000040605
24578	false	-1	TF-TG	ENSMUSG00000025025 (TF-TG) ENSMUSG00000040345
12290	false	-1	TF-TG	ENSMUSG00000017950 (TF-TG) ENSMUSG00000041268
24577	false	-1	TF-TG	ENSMUSG00000025025 (TF-TG) ENSMUSG00000040280
12289	false	-1	TF-TG	ENSMUSG00000017950 (TF-TG) ENSMUSG00000041237
12288	false	-1	TF-TG	ENSMUSG00000017950 (TF-TG) ENSMUSG00000041202
8191	false	-1	TF-TG	ENSMUSG00000022479 (TF-TG) ENSMUSG00000040462
8190	false	-1	TF-TG	ENSMUSG00000022479 (TF-TG) ENSMUSG00000040447
24573	false	-1	TF-TG	ENSMUSG00000025025 (TF-TG) ENSMUSG00000039648
8189	false	-1	TF-TG	ENSMUSG00000022479 (TF-TG) ENSMUSG00000040433
8188	false	-1	TF-TG	ENSMUSG00000022479 (TF-TG) ENSMUSG00000040430
24571	false	-1	TF-TG	ENSMUSG00000025025 (TF-TG) ENSMUSG00000039323
12283	false	-1	TF-TG	ENSMUSG00000017950 (TF-TG) ENSMUSG00000041064
12282	false	-1	TF-TG	ENSMUSG00000017950 (TF-TG) ENSMUSG00000041058
12281	false	-1	TF-TG	ENSMUSG00000017950 (TF-TG) ENSMUSG00000041040
8185	false	-1	TF-TG	ENSMUSG00000022479 (TF-TG) ENSMUSG00000040345
12280	false	-1	TF-TG	ENSMUSG00000017950 (TF-TG) ENSMUSG00000040998
24567	false	-1	TF-TG	ENSMUSG00000025025 (TF-TG) ENSMUSG00000039050
12279	false	-1	TF-TG	ENSMUSG00000017950 (TF-TG) ENSMUSG00000040918
8183	false	-1	TF-TG	ENSMUSG00000022479 (TF-TG) ENSMUSG00000040280
24566	false	-1	TF-TG	ENSMUSG00000025025 (TF-TG) ENSMUSG00000038777
12278	false	-1	TF-TG	ENSMUSG00000017950 (TF-TG) ENSMUSG00000040852
24564	false	-1	TF-TG	ENSMUSG00000025025 (TF-TG) ENSMUSG00000038599
12276	false	-1	TF-TG	ENSMUSG00000017950 (TF-TG) ENSMUSG00000040631
12275	false	-1	TF-TG	ENSMUSG00000017950 (TF-TG) ENSMUSG00000040605
24562	false	-1	TF-TG	ENSMUSG00000025025 (TF-TG) ENSMUSG00000038451
8176	false	-1	TF-TG	ENSMUSG00000022479 (TF-TG) ENSMUSG00000040127
12271	false	-1	TF-TG	ENSMUSG00000017950 (TF-TG) ENSMUSG00000040433
24558	false	-1	TF-TG	ENSMUSG00000025025 (TF-TG) ENSMUSG00000038042
24554	false	-1	TF-TG	ENSMUSG00000025025 (TF-TG) ENSMUSG00000037820
8170	false	-1	TF-TG	ENSMUSG00000022479 (TF-TG) ENSMUSG00000039943
24553	false	-1	TF-TG	ENSMUSG00000025025 (TF-TG) ENSMUSG00000037664
8169	false	-1	TF-TG	ENSMUSG00000022479 (TF-TG) ENSMUSG00000039934
24552	false	-1	TF-TG	ENSMUSG00000025025 (TF-TG) ENSMUSG00000037621
12264	false	-1	TF-TG	ENSMUSG00000017950 (TF-TG) ENSMUSG00000040127
8168	false	-1	TF-TG	ENSMUSG00000022479 (TF-TG) ENSMUSG00000039911
24551	false	-1	TF-TG	ENSMUSG00000025025 (TF-TG) ENSMUSG00000037606
12263	false	-1	TF-TG	ENSMUSG00000017950 (TF-TG) ENSMUSG00000040084
24550	false	-1	TF-TG	ENSMUSG00000025025 (TF-TG) ENSMUSG00000037583
24547	false	-1	TF-TG	ENSMUSG00000025025 (TF-TG) ENSMUSG00000037235
12258	false	-1	TF-TG	ENSMUSG00000017950 (TF-TG) ENSMUSG00000039934
8162	false	-1	TF-TG	ENSMUSG00000022479 (TF-TG) ENSMUSG00000039683
24545	false	-1	TF-TG	ENSMUSG00000025025 (TF-TG) ENSMUSG00000037071
8160	false	-1	TF-TG	ENSMUSG00000022479 (TF-TG) ENSMUSG00000039648
24542	false	-1	TF-TG	ENSMUSG00000025025 (TF-TG) ENSMUSG00000036880
8158	false	-1	TF-TG	ENSMUSG00000022479 (TF-TG) ENSMUSG00000039616
12253	false	-1	TF-TG	ENSMUSG00000017950 (TF-TG) ENSMUSG00000039648
12250	false	-1	TF-TG	ENSMUSG00000017950 (TF-TG) ENSMUSG00000039323
8153	false	-1	TF-TG	ENSMUSG00000022479 (TF-TG) ENSMUSG00000039470
24535	false	-1	TF-TG	ENSMUSG00000025025 (TF-TG) ENSMUSG00000035711
24534	false	-1	TF-TG	ENSMUSG00000025025 (TF-TG) ENSMUSG00000035561
24533	false	-1	TF-TG	ENSMUSG00000025025 (TF-TG) ENSMUSG00000035441
8149	false	-1	TF-TG	ENSMUSG00000022479 (TF-TG) ENSMUSG00000039323
12244	false	-1	TF-TG	ENSMUSG00000017950 (TF-TG) ENSMUSG00000039114
12243	false	-1	TF-TG	ENSMUSG00000017950 (TF-TG) ENSMUSG00000039050
24530	false	-1	TF-TG	ENSMUSG00000025025 (TF-TG) ENSMUSG00000035158
12241	false	-1	TF-TG	ENSMUSG00000017950 (TF-TG) ENSMUSG00000038903
8145	false	-1	TF-TG	ENSMUSG00000022479 (TF-TG) ENSMUSG00000039232
24528	false	-1	TF-TG	ENSMUSG00000025025 (TF-TG) ENSMUSG00000034858
12240	false	-1	TF-TG	ENSMUSG00000017950 (TF-TG) ENSMUSG00000038884
12239	false	-1	TF-TG	ENSMUSG00000017950 (TF-TG) ENSMUSG00000038843
24526	false	-1	TF-TG	ENSMUSG00000025025 (TF-TG) ENSMUSG00000034768
12236	false	-1	TF-TG	ENSMUSG00000017950 (TF-TG) ENSMUSG00000038745
8140	false	-1	TF-TG	ENSMUSG00000022479 (TF-TG) ENSMUSG00000039158
12235	false	-1	TF-TG	ENSMUSG00000017950 (TF-TG) ENSMUSG00000038599
24522	false	-1	TF-TG	ENSMUSG00000025025 (TF-TG) ENSMUSG00000034413
8137	false	-1	TF-TG	ENSMUSG00000022479 (TF-TG) ENSMUSG00000039126
24520	false	-1	TF-TG	ENSMUSG00000025025 (TF-TG) ENSMUSG00000034265
12232	false	-1	TF-TG	ENSMUSG00000017950 (TF-TG) ENSMUSG00000038463
12231	false	-1	TF-TG	ENSMUSG00000017950 (TF-TG) ENSMUSG00000038451
8135	false	-1	TF-TG	ENSMUSG00000022479 (TF-TG) ENSMUSG00000039114
12230	false	-1	TF-TG	ENSMUSG00000017950 (TF-TG) ENSMUSG00000038379
8134	false	-1	TF-TG	ENSMUSG00000022479 (TF-TG) ENSMUSG00000039087
24517	false	-1	TF-TG	ENSMUSG00000025025 (TF-TG) ENSMUSG00000034116
12229	false	-1	TF-TG	ENSMUSG00000017950 (TF-TG) ENSMUSG00000038371
8132	false	-1	TF-TG	ENSMUSG00000022479 (TF-TG) ENSMUSG00000039050
24515	false	-1	TF-TG	ENSMUSG00000025025 (TF-TG) ENSMUSG00000033917
24513	false	-1	TF-TG	ENSMUSG00000025025 (TF-TG) ENSMUSG00000033685
12225	false	-1	TF-TG	ENSMUSG00000017950 (TF-TG) ENSMUSG00000037936
12224	false	-1	TF-TG	ENSMUSG00000017950 (TF-TG) ENSMUSG00000037820
12223	false	-1	TF-TG	ENSMUSG00000017950 (TF-TG) ENSMUSG00000037797
24510	false	-1	TF-TG	ENSMUSG00000025025 (TF-TG) ENSMUSG00000033318
8126	false	-1	TF-TG	ENSMUSG00000022479 (TF-TG) ENSMUSG00000038903
24509	false	-1	TF-TG	ENSMUSG00000025025 (TF-TG) ENSMUSG00000033287
8125	false	-1	TF-TG	ENSMUSG00000022479 (TF-TG) ENSMUSG00000038884
24508	false	-1	TF-TG	ENSMUSG00000025025 (TF-TG) ENSMUSG00000033256
24507	false	-1	TF-TG	ENSMUSG00000025025 (TF-TG) ENSMUSG00000032978
8123	false	-1	TF-TG	ENSMUSG00000022479 (TF-TG) ENSMUSG00000038843
8122	false	-1	TF-TG	ENSMUSG00000022479 (TF-TG) ENSMUSG00000038836
12217	false	-1	TF-TG	ENSMUSG00000017950 (TF-TG) ENSMUSG00000037621
8121	false	-1	TF-TG	ENSMUSG00000022479 (TF-TG) ENSMUSG00000038777
24504	false	-1	TF-TG	ENSMUSG00000025025 (TF-TG) ENSMUSG00000032855
24503	false	-1	TF-TG	ENSMUSG00000025025 (TF-TG) ENSMUSG00000032849
8119	false	-1	TF-TG	ENSMUSG00000022479 (TF-TG) ENSMUSG00000038745
24502	false	-1	TF-TG	ENSMUSG00000025025 (TF-TG) ENSMUSG00000032754
12213	false	-1	TF-TG	ENSMUSG00000017950 (TF-TG) ENSMUSG00000037447
24500	false	-1	TF-TG	ENSMUSG00000025025 (TF-TG) ENSMUSG00000032656
24499	false	-1	TF-TG	ENSMUSG00000025025 (TF-TG) ENSMUSG00000032431
24498	false	-1	TF-TG	ENSMUSG00000025025 (TF-TG) ENSMUSG00000032380
12210	false	-1	TF-TG	ENSMUSG00000017950 (TF-TG) ENSMUSG00000037315
24496	false	-1	TF-TG	ENSMUSG00000025025 (TF-TG) ENSMUSG00000032314
12208	false	-1	TF-TG	ENSMUSG00000017950 (TF-TG) ENSMUSG00000037071
8112	false	-1	TF-TG	ENSMUSG00000022479 (TF-TG) ENSMUSG00000038599
12207	false	-1	TF-TG	ENSMUSG00000017950 (TF-TG) ENSMUSG00000036913
24494	false	-1	TF-TG	ENSMUSG00000025025 (TF-TG) ENSMUSG00000032245
24492	false	-1	TF-TG	ENSMUSG00000025025 (TF-TG) ENSMUSG00000032026
12204	false	-1	TF-TG	ENSMUSG00000017950 (TF-TG) ENSMUSG00000036887
24491	false	-1	TF-TG	ENSMUSG00000025025 (TF-TG) ENSMUSG00000032018
12203	false	-1	TF-TG	ENSMUSG00000017950 (TF-TG) ENSMUSG00000036880
8107	false	-1	TF-TG	ENSMUSG00000022479 (TF-TG) ENSMUSG00000038486
24490	false	-1	TF-TG	ENSMUSG00000025025 (TF-TG) ENSMUSG00000032014
12202	false	-1	TF-TG	ENSMUSG00000017950 (TF-TG) ENSMUSG00000036863
8106	false	-1	TF-TG	ENSMUSG00000022479 (TF-TG) ENSMUSG00000038463
12201	false	-1	TF-TG	ENSMUSG00000017950 (TF-TG) ENSMUSG00000036813
24488	false	-1	TF-TG	ENSMUSG00000025025 (TF-TG) ENSMUSG00000031903
12200	false	-1	TF-TG	ENSMUSG00000017950 (TF-TG) ENSMUSG00000036437
8104	false	-1	TF-TG	ENSMUSG00000022479 (TF-TG) ENSMUSG00000038451
12199	false	-1	TF-TG	ENSMUSG00000017950 (TF-TG) ENSMUSG00000036368
8103	false	-1	TF-TG	ENSMUSG00000022479 (TF-TG) ENSMUSG00000038422
8102	false	-1	TF-TG	ENSMUSG00000022479 (TF-TG) ENSMUSG00000038379
12197	false	-1	TF-TG	ENSMUSG00000017950 (TF-TG) ENSMUSG00000036216
8101	false	-1	TF-TG	ENSMUSG00000022479 (TF-TG) ENSMUSG00000038371
24484	false	-1	TF-TG	ENSMUSG00000025025 (TF-TG) ENSMUSG00000031538
8099	false	-1	TF-TG	ENSMUSG00000022479 (TF-TG) ENSMUSG00000038349
24482	false	-1	TF-TG	ENSMUSG00000025025 (TF-TG) ENSMUSG00000031453
12194	false	-1	TF-TG	ENSMUSG00000017950 (TF-TG) ENSMUSG00000036123
24481	false	-1	TF-TG	ENSMUSG00000025025 (TF-TG) ENSMUSG00000030762
24479	false	-1	TF-TG	ENSMUSG00000025025 (TF-TG) ENSMUSG00000030717
24476	false	-1	TF-TG	ENSMUSG00000025025 (TF-TG) ENSMUSG00000030528
12187	false	-1	TF-TG	ENSMUSG00000017950 (TF-TG) ENSMUSG00000035711
8091	false	-1	TF-TG	ENSMUSG00000022479 (TF-TG) ENSMUSG00000038175
8089	false	-1	TF-TG	ENSMUSG00000022479 (TF-TG) ENSMUSG00000038042
24472	false	-1	TF-TG	ENSMUSG00000025025 (TF-TG) ENSMUSG00000029847
12184	false	-1	TF-TG	ENSMUSG00000017950 (TF-TG) ENSMUSG00000035561
24471	false	-1	TF-TG	ENSMUSG00000025025 (TF-TG) ENSMUSG00000029814
24470	false	-1	TF-TG	ENSMUSG00000025025 (TF-TG) ENSMUSG00000029772
24469	false	-1	TF-TG	ENSMUSG00000025025 (TF-TG) ENSMUSG00000029769
12181	false	-1	TF-TG	ENSMUSG00000017950 (TF-TG) ENSMUSG00000035441
24468	false	-1	TF-TG	ENSMUSG00000025025 (TF-TG) ENSMUSG00000029560
24466	false	-1	TF-TG	ENSMUSG00000025025 (TF-TG) ENSMUSG00000029470
12178	false	-1	TF-TG	ENSMUSG00000017950 (TF-TG) ENSMUSG00000035357
24464	false	-1	TF-TG	ENSMUSG00000025025 (TF-TG) ENSMUSG00000029370
12176	false	-1	TF-TG	ENSMUSG00000017950 (TF-TG) ENSMUSG00000035105
8080	false	-1	TF-TG	ENSMUSG00000022479 (TF-TG) ENSMUSG00000037936
24462	false	-1	TF-TG	ENSMUSG00000025025 (TF-TG) ENSMUSG00000029177
12173	false	-1	TF-TG	ENSMUSG00000017950 (TF-TG) ENSMUSG00000034858
8076	false	-1	TF-TG	ENSMUSG00000022479 (TF-TG) ENSMUSG00000037820
8075	false	-1	TF-TG	ENSMUSG00000022479 (TF-TG) ENSMUSG00000037797
24457	false	-1	TF-TG	ENSMUSG00000025025 (TF-TG) ENSMUSG00000028943
12169	false	-1	TF-TG	ENSMUSG00000017950 (TF-TG) ENSMUSG00000034773
12168	false	-1	TF-TG	ENSMUSG00000017950 (TF-TG) ENSMUSG00000034687
12167	false	-1	TF-TG	ENSMUSG00000017950 (TF-TG) ENSMUSG00000034579
24452	false	-1	TF-TG	ENSMUSG00000025025 (TF-TG) ENSMUSG00000028614
8068	false	-1	TF-TG	ENSMUSG00000022479 (TF-TG) ENSMUSG00000037664
24451	false	-1	TF-TG	ENSMUSG00000025025 (TF-TG) ENSMUSG00000028602
12163	false	-1	TF-TG	ENSMUSG00000017950 (TF-TG) ENSMUSG00000034413
24450	false	-1	TF-TG	ENSMUSG00000025025 (TF-TG) ENSMUSG00000028576
24449	false	-1	TF-TG	ENSMUSG00000025025 (TF-TG) ENSMUSG00000028555
8065	false	-1	TF-TG	ENSMUSG00000022479 (TF-TG) ENSMUSG00000037624
24448	false	-1	TF-TG	ENSMUSG00000025025 (TF-TG) ENSMUSG00000028542
8064	false	-1	TF-TG	ENSMUSG00000022479 (TF-TG) ENSMUSG00000037621
24447	false	-1	TF-TG	ENSMUSG00000025025 (TF-TG) ENSMUSG00000028415
12159	false	-1	TF-TG	ENSMUSG00000017950 (TF-TG) ENSMUSG00000034265
24446	false	-1	TF-TG	ENSMUSG00000025025 (TF-TG) ENSMUSG00000028341
8062	false	-1	TF-TG	ENSMUSG00000022479 (TF-TG) ENSMUSG00000037606
24445	false	-1	TF-TG	ENSMUSG00000025025 (TF-TG) ENSMUSG00000028327
12157	false	-1	TF-TG	ENSMUSG00000017950 (TF-TG) ENSMUSG00000034116
8061	false	-1	TF-TG	ENSMUSG00000022479 (TF-TG) ENSMUSG00000037583
24444	false	-1	TF-TG	ENSMUSG00000025025 (TF-TG) ENSMUSG00000028211
8060	false	-1	TF-TG	ENSMUSG00000022479 (TF-TG) ENSMUSG00000037579
12155	false	-1	TF-TG	ENSMUSG00000017950 (TF-TG) ENSMUSG00000033917
24442	false	-1	TF-TG	ENSMUSG00000025025 (TF-TG) ENSMUSG00000027746
24441	false	-1	TF-TG	ENSMUSG00000025025 (TF-TG) ENSMUSG00000027737
12152	false	-1	TF-TG	ENSMUSG00000017950 (TF-TG) ENSMUSG00000033871
12151	false	-1	TF-TG	ENSMUSG00000017950 (TF-TG) ENSMUSG00000033685
8055	false	-1	TF-TG	ENSMUSG00000022479 (TF-TG) ENSMUSG00000037447
24438	false	-1	TF-TG	ENSMUSG00000025025 (TF-TG) ENSMUSG00000027514
12150	false	-1	TF-TG	ENSMUSG00000017950 (TF-TG) ENSMUSG00000033610
12148	false	-1	TF-TG	ENSMUSG00000017950 (TF-TG) ENSMUSG00000033530
24435	false	-1	TF-TG	ENSMUSG00000025025 (TF-TG) ENSMUSG00000027316
8051	false	-1	TF-TG	ENSMUSG00000022479 (TF-TG) ENSMUSG00000037386
24434	false	-1	TF-TG	ENSMUSG00000025025 (TF-TG) ENSMUSG00000027313
8050	false	-1	TF-TG	ENSMUSG00000022479 (TF-TG) ENSMUSG00000037379
24433	false	-1	TF-TG	ENSMUSG00000025025 (TF-TG) ENSMUSG00000027006
12145	false	-1	TF-TG	ENSMUSG00000017950 (TF-TG) ENSMUSG00000033318
24432	false	-1	TF-TG	ENSMUSG00000025025 (TF-TG) ENSMUSG00000026980
8048	false	-1	TF-TG	ENSMUSG00000022479 (TF-TG) ENSMUSG00000037315
24431	false	-1	TF-TG	ENSMUSG00000025025 (TF-TG) ENSMUSG00000026921
12143	false	-1	TF-TG	ENSMUSG00000017950 (TF-TG) ENSMUSG00000033287
8047	false	-1	TF-TG	ENSMUSG00000022479 (TF-TG) ENSMUSG00000037235
24430	false	-1	TF-TG	ENSMUSG00000025025 (TF-TG) ENSMUSG00000026820
12142	false	-1	TF-TG	ENSMUSG00000017950 (TF-TG) ENSMUSG00000033256
12141	false	-1	TF-TG	ENSMUSG00000017950 (TF-TG) ENSMUSG00000033177
24428	false	-1	TF-TG	ENSMUSG00000025025 (TF-TG) ENSMUSG00000026782
12140	false	-1	TF-TG	ENSMUSG00000017950 (TF-TG) ENSMUSG00000033107
8044	false	-1	TF-TG	ENSMUSG00000022479 (TF-TG) ENSMUSG00000037169
12139	false	-1	TF-TG	ENSMUSG00000017950 (TF-TG) ENSMUSG00000033105
12138	false	-1	TF-TG	ENSMUSG00000017950 (TF-TG) ENSMUSG00000032978
24425	false	-1	TF-TG	ENSMUSG00000025025 (TF-TG) ENSMUSG00000026649
8041	false	-1	TF-TG	ENSMUSG00000022479 (TF-TG) ENSMUSG00000037071
24423	false	-1	TF-TG	ENSMUSG00000025025 (TF-TG) ENSMUSG00000026605
8037	false	-1	TF-TG	ENSMUSG00000022479 (TF-TG) ENSMUSG00000036944
12132	false	-1	TF-TG	ENSMUSG00000017950 (TF-TG) ENSMUSG00000032855
12131	false	-1	TF-TG	ENSMUSG00000017950 (TF-TG) ENSMUSG00000032849
24418	false	-1	TF-TG	ENSMUSG00000025025 (TF-TG) ENSMUSG00000026170
12129	false	-1	TF-TG	ENSMUSG00000017950 (TF-TG) ENSMUSG00000032754
8033	false	-1	TF-TG	ENSMUSG00000022479 (TF-TG) ENSMUSG00000036887
24416	false	-1	TF-TG	ENSMUSG00000025025 (TF-TG) ENSMUSG00000026107
12128	false	-1	TF-TG	ENSMUSG00000017950 (TF-TG) ENSMUSG00000032733
8032	false	-1	TF-TG	ENSMUSG00000022479 (TF-TG) ENSMUSG00000036880
24415	false	-1	TF-TG	ENSMUSG00000025025 (TF-TG) ENSMUSG00000026072
8031	false	-1	TF-TG	ENSMUSG00000022479 (TF-TG) ENSMUSG00000036863
8029	false	-1	TF-TG	ENSMUSG00000022479 (TF-TG) ENSMUSG00000036813
24412	false	-1	TF-TG	ENSMUSG00000025025 (TF-TG) ENSMUSG00000025758
12121	false	-1	TF-TG	ENSMUSG00000017950 (TF-TG) ENSMUSG00000032411
12120	false	-1	TF-TG	ENSMUSG00000017950 (TF-TG) ENSMUSG00000032380
8023	false	-1	TF-TG	ENSMUSG00000022479 (TF-TG) ENSMUSG00000036526
24406	false	-1	TF-TG	ENSMUSG00000025025 (TF-TG) ENSMUSG00000025279
24405	false	-1	TF-TG	ENSMUSG00000025025 (TF-TG) ENSMUSG00000025203
8021	false	-1	TF-TG	ENSMUSG00000022479 (TF-TG) ENSMUSG00000036437
24404	false	-1	TF-TG	ENSMUSG00000025025 (TF-TG) ENSMUSG00000025176
8020	false	-1	TF-TG	ENSMUSG00000022479 (TF-TG) ENSMUSG00000036368
12115	false	-1	TF-TG	ENSMUSG00000017950 (TF-TG) ENSMUSG00000032294
12114	false	-1	TF-TG	ENSMUSG00000017950 (TF-TG) ENSMUSG00000032245
24399	false	-1	TF-TG	ENSMUSG00000025025 (TF-TG) ENSMUSG00000024665
8014	false	-1	TF-TG	ENSMUSG00000022479 (TF-TG) ENSMUSG00000036216
24396	false	-1	TF-TG	ENSMUSG00000025025 (TF-TG) ENSMUSG00000024525
8012	false	-1	TF-TG	ENSMUSG00000022479 (TF-TG) ENSMUSG00000036123
12106	false	-1	TF-TG	ENSMUSG00000017950 (TF-TG) ENSMUSG00000032018
24393	false	-1	TF-TG	ENSMUSG00000025025 (TF-TG) ENSMUSG00000024013
12105	false	-1	TF-TG	ENSMUSG00000017950 (TF-TG) ENSMUSG00000032014
12103	false	-1	TF-TG	ENSMUSG00000017950 (TF-TG) ENSMUSG00000031980
12102	false	-1	TF-TG	ENSMUSG00000017950 (TF-TG) ENSMUSG00000031957
8006	false	-1	TF-TG	ENSMUSG00000022479 (TF-TG) ENSMUSG00000035901
12100	false	-1	TF-TG	ENSMUSG00000017950 (TF-TG) ENSMUSG00000031903
12098	false	-1	TF-TG	ENSMUSG00000017950 (TF-TG) ENSMUSG00000031891
24385	false	-1	TF-TG	ENSMUSG00000025025 (TF-TG) ENSMUSG00000023043
24384	false	-1	TF-TG	ENSMUSG00000025025 (TF-TG) ENSMUSG00000023032
24383	false	-1	TF-TG	ENSMUSG00000025025 (TF-TG) ENSMUSG00000023017
12094	false	-1	TF-TG	ENSMUSG00000017950 (TF-TG) ENSMUSG00000031827
24381	false	-1	TF-TG	ENSMUSG00000025025 (TF-TG) ENSMUSG00000022947
12093	false	-1	TF-TG	ENSMUSG00000017950 (TF-TG) ENSMUSG00000031791
24380	false	-1	TF-TG	ENSMUSG00000025025 (TF-TG) ENSMUSG00000022938
7996	false	-1	TF-TG	ENSMUSG00000022479 (TF-TG) ENSMUSG00000035683
24379	false	-1	TF-TG	ENSMUSG00000025025 (TF-TG) ENSMUSG00000022864
12089	false	-1	TF-TG	ENSMUSG00000017950 (TF-TG) ENSMUSG00000031765
12088	false	-1	TF-TG	ENSMUSG00000017950 (TF-TG) ENSMUSG00000031725
7992	false	-1	TF-TG	ENSMUSG00000022479 (TF-TG) ENSMUSG00000035561
12087	false	-1	TF-TG	ENSMUSG00000017950 (TF-TG) ENSMUSG00000031668
24372	false	-1	TF-TG	ENSMUSG00000025025 (TF-TG) ENSMUSG00000022364
7987	false	-1	TF-TG	ENSMUSG00000022479 (TF-TG) ENSMUSG00000035441
24370	false	-1	TF-TG	ENSMUSG00000025025 (TF-TG) ENSMUSG00000022148
12082	false	-1	TF-TG	ENSMUSG00000017950 (TF-TG) ENSMUSG00000031538
24369	false	-1	TF-TG	ENSMUSG00000025025 (TF-TG) ENSMUSG00000022136
12081	false	-1	TF-TG	ENSMUSG00000017950 (TF-TG) ENSMUSG00000031520
7984	false	-1	TF-TG	ENSMUSG00000022479 (TF-TG) ENSMUSG00000035357
24367	false	-1	TF-TG	ENSMUSG00000025025 (TF-TG) ENSMUSG00000022094
12079	false	-1	TF-TG	ENSMUSG00000017950 (TF-TG) ENSMUSG00000031375
24364	false	-1	TF-TG	ENSMUSG00000025025 (TF-TG) ENSMUSG00000021876
7980	false	-1	TF-TG	ENSMUSG00000022479 (TF-TG) ENSMUSG00000035239
24363	false	-1	TF-TG	ENSMUSG00000025025 (TF-TG) ENSMUSG00000021806
12071	false	-1	TF-TG	ENSMUSG00000017950 (TF-TG) ENSMUSG00000030769
24358	false	-1	TF-TG	ENSMUSG00000025025 (TF-TG) ENSMUSG00000021453
12070	false	-1	TF-TG	ENSMUSG00000017950 (TF-TG) ENSMUSG00000030762
7974	false	-1	TF-TG	ENSMUSG00000022479 (TF-TG) ENSMUSG00000035158
7972	false	-1	TF-TG	ENSMUSG00000022479 (TF-TG) ENSMUSG00000035105
24355	false	-1	TF-TG	ENSMUSG00000025025 (TF-TG) ENSMUSG00000021221
12067	false	-1	TF-TG	ENSMUSG00000017950 (TF-TG) ENSMUSG00000030717
24354	false	-1	TF-TG	ENSMUSG00000025025 (TF-TG) ENSMUSG00000021196
12066	false	-1	TF-TG	ENSMUSG00000017950 (TF-TG) ENSMUSG00000030543
7969	false	-1	TF-TG	ENSMUSG00000022479 (TF-TG) ENSMUSG00000034858
24351	false	-1	TF-TG	ENSMUSG00000025025 (TF-TG) ENSMUSG00000020894
12062	false	-1	TF-TG	ENSMUSG00000017950 (TF-TG) ENSMUSG00000030329
24349	false	-1	TF-TG	ENSMUSG00000025025 (TF-TG) ENSMUSG00000020872
12060	false	-1	TF-TG	ENSMUSG00000017950 (TF-TG) ENSMUSG00000030155
7964	false	-1	TF-TG	ENSMUSG00000022479 (TF-TG) ENSMUSG00000034773
7963	false	-1	TF-TG	ENSMUSG00000022479 (TF-TG) ENSMUSG00000034768
24346	false	-1	TF-TG	ENSMUSG00000025025 (TF-TG) ENSMUSG00000020741
7961	false	-1	TF-TG	ENSMUSG00000022479 (TF-TG) ENSMUSG00000034687
12056	false	-1	TF-TG	ENSMUSG00000017950 (TF-TG) ENSMUSG00000030048
7960	false	-1	TF-TG	ENSMUSG00000022479 (TF-TG) ENSMUSG00000034684
24343	false	-1	TF-TG	ENSMUSG00000025025 (TF-TG) ENSMUSG00000020471
24341	false	-1	TF-TG	ENSMUSG00000025025 (TF-TG) ENSMUSG00000020435
24340	false	-1	TF-TG	ENSMUSG00000025025 (TF-TG) ENSMUSG00000020402
12052	false	-1	TF-TG	ENSMUSG00000017950 (TF-TG) ENSMUSG00000029772
24339	false	-1	TF-TG	ENSMUSG00000025025 (TF-TG) ENSMUSG00000020376
12051	false	-1	TF-TG	ENSMUSG00000017950 (TF-TG) ENSMUSG00000029769
24338	false	-1	TF-TG	ENSMUSG00000025025 (TF-TG) ENSMUSG00000020277
7954	false	-1	TF-TG	ENSMUSG00000022479 (TF-TG) ENSMUSG00000034579
24337	false	-1	TF-TG	ENSMUSG00000025025 (TF-TG) ENSMUSG00000020261
12049	false	-1	TF-TG	ENSMUSG00000017950 (TF-TG) ENSMUSG00000029674
12047	false	-1	TF-TG	ENSMUSG00000017950 (TF-TG) ENSMUSG00000029522
24334	false	-1	TF-TG	ENSMUSG00000025025 (TF-TG) ENSMUSG00000020034
12046	false	-1	TF-TG	ENSMUSG00000017950 (TF-TG) ENSMUSG00000029470
24333	false	-1	TF-TG	ENSMUSG00000025025 (TF-TG) ENSMUSG00000020015
24332	false	-1	TF-TG	ENSMUSG00000025025 (TF-TG) ENSMUSG00000020014
12044	false	-1	TF-TG	ENSMUSG00000017950 (TF-TG) ENSMUSG00000029370
7948	false	-1	TF-TG	ENSMUSG00000022479 (TF-TG) ENSMUSG00000034413
24331	false	-1	TF-TG	ENSMUSG00000025025 (TF-TG) ENSMUSG00000020009
24330	false	-1	TF-TG	ENSMUSG00000025025 (TF-TG) ENSMUSG00000019916
12042	false	-1	TF-TG	ENSMUSG00000017950 (TF-TG) ENSMUSG00000029330
24329	false	-1	TF-TG	ENSMUSG00000025025 (TF-TG) ENSMUSG00000019564
24326	false	-1	TF-TG	ENSMUSG00000025025 (TF-TG) ENSMUSG00000018334
7941	false	-1	TF-TG	ENSMUSG00000022479 (TF-TG) ENSMUSG00000034265
12036	false	-1	TF-TG	ENSMUSG00000017950 (TF-TG) ENSMUSG00000029177
24323	false	-1	TF-TG	ENSMUSG00000025025 (TF-TG) ENSMUSG00000017692
12035	false	-1	TF-TG	ENSMUSG00000017950 (TF-TG) ENSMUSG00000029173
24322	false	-1	TF-TG	ENSMUSG00000025025 (TF-TG) ENSMUSG00000017652
24321	false	-1	TF-TG	ENSMUSG00000025025 (TF-TG) ENSMUSG00000017446
7937	false	-1	TF-TG	ENSMUSG00000022479 (TF-TG) ENSMUSG00000034116
12032	false	-1	TF-TG	ENSMUSG00000017950 (TF-TG) ENSMUSG00000029161
24319	false	-1	TF-TG	ENSMUSG00000025025 (TF-TG) ENSMUSG00000017165
7933	false	-1	TF-TG	ENSMUSG00000022479 (TF-TG) ENSMUSG00000033917
12027	false	-1	TF-TG	ENSMUSG00000017950 (TF-TG) ENSMUSG00000028874
7931	false	-1	TF-TG	ENSMUSG00000022479 (TF-TG) ENSMUSG00000033871
24314	false	-1	TF-TG	ENSMUSG00000025025 (TF-TG) ENSMUSG00000015745
24313	false	-1	TF-TG	ENSMUSG00000025025 (TF-TG) ENSMUSG00000015396
12024	false	-1	TF-TG	ENSMUSG00000017950 (TF-TG) ENSMUSG00000028649
24311	false	-1	TF-TG	ENSMUSG00000025025 (TF-TG) ENSMUSG00000014303
12023	false	-1	TF-TG	ENSMUSG00000017950 (TF-TG) ENSMUSG00000028634
12022	false	-1	TF-TG	ENSMUSG00000017950 (TF-TG) ENSMUSG00000028614
7926	false	-1	TF-TG	ENSMUSG00000022479 (TF-TG) ENSMUSG00000033685
12021	false	-1	TF-TG	ENSMUSG00000017950 (TF-TG) ENSMUSG00000028542
12019	false	-1	TF-TG	ENSMUSG00000017950 (TF-TG) ENSMUSG00000028517
7923	false	-1	TF-TG	ENSMUSG00000022479 (TF-TG) ENSMUSG00000033610
24306	false	-1	TF-TG	ENSMUSG00000025025 (TF-TG) ENSMUSG00000012126
12018	false	-1	TF-TG	ENSMUSG00000017950 (TF-TG) ENSMUSG00000028415
24304	false	-1	TF-TG	ENSMUSG00000025025 (TF-TG) ENSMUSG00000011148
24303	false	-1	TF-TG	ENSMUSG00000025025 (TF-TG) ENSMUSG00000010362
24302	false	-1	TF-TG	ENSMUSG00000025025 (TF-TG) ENSMUSG00000010122
7918	false	-1	TF-TG	ENSMUSG00000022479 (TF-TG) ENSMUSG00000033530
24301	false	-1	TF-TG	ENSMUSG00000025025 (TF-TG) ENSMUSG00000009739
12013	false	-1	TF-TG	ENSMUSG00000017950 (TF-TG) ENSMUSG00000028211
12012	false	-1	TF-TG	ENSMUSG00000017950 (TF-TG) ENSMUSG00000028186
7915	false	-1	TF-TG	ENSMUSG00000022479 (TF-TG) ENSMUSG00000033318
24297	false	-1	TF-TG	ENSMUSG00000025025 (TF-TG) ENSMUSG00000005413
12008	false	-1	TF-TG	ENSMUSG00000017950 (TF-TG) ENSMUSG00000028076
24295	false	-1	TF-TG	ENSMUSG00000025025 (TF-TG) ENSMUSG00000004880
7911	false	-1	TF-TG	ENSMUSG00000022479 (TF-TG) ENSMUSG00000033256
24294	false	-1	TF-TG	ENSMUSG00000025025 (TF-TG) ENSMUSG00000004328
24293	false	-1	TF-TG	ENSMUSG00000025025 (TF-TG) ENSMUSG00000004044
7909	false	-1	TF-TG	ENSMUSG00000022479 (TF-TG) ENSMUSG00000033209
12004	false	-1	TF-TG	ENSMUSG00000017950 (TF-TG) ENSMUSG00000027954
7908	false	-1	TF-TG	ENSMUSG00000022479 (TF-TG) ENSMUSG00000033177
12003	false	-1	TF-TG	ENSMUSG00000017950 (TF-TG) ENSMUSG00000027907
7907	false	-1	TF-TG	ENSMUSG00000022479 (TF-TG) ENSMUSG00000033161
12002	false	-1	TF-TG	ENSMUSG00000017950 (TF-TG) ENSMUSG00000027883
24289	false	-1	TF-TG	ENSMUSG00000025025 (TF-TG) ENSMUSG00000002997
7905	false	-1	TF-TG	ENSMUSG00000022479 (TF-TG) ENSMUSG00000033147
7904	false	-1	TF-TG	ENSMUSG00000022479 (TF-TG) ENSMUSG00000033107
7903	false	-1	TF-TG	ENSMUSG00000022479 (TF-TG) ENSMUSG00000033105
24286	false	-1	TF-TG	ENSMUSG00000025025 (TF-TG) ENSMUSG00000001467
7902	false	-1	TF-TG	ENSMUSG00000022479 (TF-TG) ENSMUSG00000033083
24285	false	-1	TF-TG	ENSMUSG00000025025 (TF-TG) ENSMUSG00000000791
11997	false	-1	TF-TG	ENSMUSG00000017950 (TF-TG) ENSMUSG00000027750
11996	false	-1	TF-TG	ENSMUSG00000017950 (TF-TG) ENSMUSG00000027746
24283	false	-1	TF-TG	ENSMUSG00000025025 (TF-TG) ENSMUSG00000000125
7899	false	-1	TF-TG	ENSMUSG00000022479 (TF-TG) ENSMUSG00000032978
11990	false	-1	TF-TG	ENSMUSG00000017950 (TF-TG) ENSMUSG00000027534
7894	false	-1	TF-TG	ENSMUSG00000022479 (TF-TG) ENSMUSG00000032855
11989	false	-1	TF-TG	ENSMUSG00000017950 (TF-TG) ENSMUSG00000027514
7891	false	-1	TF-TG	ENSMUSG00000022479 (TF-TG) ENSMUSG00000032849
7889	false	-1	TF-TG	ENSMUSG00000022479 (TF-TG) ENSMUSG00000032783
7887	false	-1	TF-TG	ENSMUSG00000022479 (TF-TG) ENSMUSG00000032754
7886	false	-1	TF-TG	ENSMUSG00000022479 (TF-TG) ENSMUSG00000032740
11981	false	-1	TF-TG	ENSMUSG00000017950 (TF-TG) ENSMUSG00000027333
7882	false	-1	TF-TG	ENSMUSG00000022479 (TF-TG) ENSMUSG00000032656
11976	false	-1	TF-TG	ENSMUSG00000017950 (TF-TG) ENSMUSG00000027173
11973	false	-1	TF-TG	ENSMUSG00000017950 (TF-TG) ENSMUSG00000027068
11972	false	-1	TF-TG	ENSMUSG00000017950 (TF-TG) ENSMUSG00000027006
11970	false	-1	TF-TG	ENSMUSG00000017950 (TF-TG) ENSMUSG00000026980
11967	false	-1	TF-TG	ENSMUSG00000017950 (TF-TG) ENSMUSG00000026921
7871	false	-1	TF-TG	ENSMUSG00000022479 (TF-TG) ENSMUSG00000032411
11966	false	-1	TF-TG	ENSMUSG00000017950 (TF-TG) ENSMUSG00000026880
7870	false	-1	TF-TG	ENSMUSG00000022479 (TF-TG) ENSMUSG00000032380
11964	false	-1	TF-TG	ENSMUSG00000017950 (TF-TG) ENSMUSG00000026820
11963	false	-1	TF-TG	ENSMUSG00000017950 (TF-TG) ENSMUSG00000026730
11959	false	-1	TF-TG	ENSMUSG00000017950 (TF-TG) ENSMUSG00000026649
11957	false	-1	TF-TG	ENSMUSG00000017950 (TF-TG) ENSMUSG00000026605
7861	false	-1	TF-TG	ENSMUSG00000022479 (TF-TG) ENSMUSG00000032314
7859	false	-1	TF-TG	ENSMUSG00000022479 (TF-TG) ENSMUSG00000032294
11954	false	-1	TF-TG	ENSMUSG00000017950 (TF-TG) ENSMUSG00000026546
11953	false	-1	TF-TG	ENSMUSG00000017950 (TF-TG) ENSMUSG00000026520
7857	false	-1	TF-TG	ENSMUSG00000022479 (TF-TG) ENSMUSG00000032278
11952	false	-1	TF-TG	ENSMUSG00000017950 (TF-TG) ENSMUSG00000026509
7855	false	-1	TF-TG	ENSMUSG00000022479 (TF-TG) ENSMUSG00000032245
11950	false	-1	TF-TG	ENSMUSG00000017950 (TF-TG) ENSMUSG00000026415
11949	false	-1	TF-TG	ENSMUSG00000017950 (TF-TG) ENSMUSG00000026398
11943	false	-1	TF-TG	ENSMUSG00000017950 (TF-TG) ENSMUSG00000026227
11941	false	-1	TF-TG	ENSMUSG00000017950 (TF-TG) ENSMUSG00000026170
11939	false	-1	TF-TG	ENSMUSG00000017950 (TF-TG) ENSMUSG00000026107
11938	false	-1	TF-TG	ENSMUSG00000017950 (TF-TG) ENSMUSG00000026077
7842	false	-1	TF-TG	ENSMUSG00000022479 (TF-TG) ENSMUSG00000032026
11937	false	-1	TF-TG	ENSMUSG00000017950 (TF-TG) ENSMUSG00000026072
7841	false	-1	TF-TG	ENSMUSG00000022479 (TF-TG) ENSMUSG00000032018
7839	false	-1	TF-TG	ENSMUSG00000022479 (TF-TG) ENSMUSG00000032014
11933	false	-1	TF-TG	ENSMUSG00000017950 (TF-TG) ENSMUSG00000025921
7837	false	-1	TF-TG	ENSMUSG00000022479 (TF-TG) ENSMUSG00000031980
7836	false	-1	TF-TG	ENSMUSG00000022479 (TF-TG) ENSMUSG00000031957
11931	false	-1	TF-TG	ENSMUSG00000017950 (TF-TG) ENSMUSG00000025893
11930	false	-1	TF-TG	ENSMUSG00000017950 (TF-TG) ENSMUSG00000025790
7834	false	-1	TF-TG	ENSMUSG00000022479 (TF-TG) ENSMUSG00000031925
11929	false	-1	TF-TG	ENSMUSG00000017950 (TF-TG) ENSMUSG00000025780
7833	false	-1	TF-TG	ENSMUSG00000022479 (TF-TG) ENSMUSG00000031903
11928	false	-1	TF-TG	ENSMUSG00000017950 (TF-TG) ENSMUSG00000025758
7829	false	-1	TF-TG	ENSMUSG00000022479 (TF-TG) ENSMUSG00000031845
7827	false	-1	TF-TG	ENSMUSG00000022479 (TF-TG) ENSMUSG00000031827
11920	false	-1	TF-TG	ENSMUSG00000017950 (TF-TG) ENSMUSG00000025477
7823	false	-1	TF-TG	ENSMUSG00000022479 (TF-TG) ENSMUSG00000031765
7821	false	-1	TF-TG	ENSMUSG00000022479 (TF-TG) ENSMUSG00000031725
11915	false	-1	TF-TG	ENSMUSG00000017950 (TF-TG) ENSMUSG00000025279
7818	false	-1	TF-TG	ENSMUSG00000022479 (TF-TG) ENSMUSG00000031668
11912	false	-1	TF-TG	ENSMUSG00000017950 (TF-TG) ENSMUSG00000025203
24197	false	-1	TF-lincRNA	ENSMUSG00000003545 (TF-lincRNA) ENSMUSG00000085329
24196	false	-1	TF-lincRNA	ENSMUSG00000003545 (TF-lincRNA) ENSMUSG00000104011
11907	false	-1	TF-TG	ENSMUSG00000017950 (TF-TG) ENSMUSG00000025075
24194	false	-1	TF-TG	ENSMUSG00000003545 (TF-TG) ENSMUSG00000079037
11906	false	-1	TF-TG	ENSMUSG00000017950 (TF-TG) ENSMUSG00000025027
24193	false	-1	TF-TG	ENSMUSG00000003545 (TF-TG) ENSMUSG00000072946
11905	false	-1	TF-TG	ENSMUSG00000017950 (TF-TG) ENSMUSG00000025025
7809	false	-1	TF-TG	ENSMUSG00000022479 (TF-TG) ENSMUSG00000031538
24192	false	-1	TF-TG	ENSMUSG00000003545 (TF-TG) ENSMUSG00000070802
24191	false	-1	TF-TG	ENSMUSG00000003545 (TF-TG) ENSMUSG00000070287
11903	false	-1	TF-TG	ENSMUSG00000017950 (TF-TG) ENSMUSG00000024990
24190	false	-1	TF-TG	ENSMUSG00000003545 (TF-TG) ENSMUSG00000069622
11902	false	-1	TF-TG	ENSMUSG00000017950 (TF-TG) ENSMUSG00000024981
7806	false	-1	TF-TG	ENSMUSG00000022479 (TF-TG) ENSMUSG00000031520
7805	false	-1	TF-TG	ENSMUSG00000022479 (TF-TG) ENSMUSG00000031453
24188	false	-1	TF-TG	ENSMUSG00000003545 (TF-TG) ENSMUSG00000066952
24187	false	-1	TF-TG	ENSMUSG00000003545 (TF-TG) ENSMUSG00000064090
24186	false	-1	TF-TG	ENSMUSG00000003545 (TF-TG) ENSMUSG00000063450
24185	false	-1	TF-TG	ENSMUSG00000003545 (TF-TG) ENSMUSG00000063439
24184	false	-1	TF-TG	ENSMUSG00000003545 (TF-TG) ENSMUSG00000061607
11896	false	-1	TF-TG	ENSMUSG00000017950 (TF-TG) ENSMUSG00000024887
11895	false	-1	TF-TG	ENSMUSG00000017950 (TF-TG) ENSMUSG00000024846
7798	false	-1	TF-TG	ENSMUSG00000022479 (TF-TG) ENSMUSG00000031375
11893	false	-1	TF-TG	ENSMUSG00000017950 (TF-TG) ENSMUSG00000024774
11892	false	-1	TF-TG	ENSMUSG00000017950 (TF-TG) ENSMUSG00000024743
7796	false	-1	TF-TG	ENSMUSG00000022479 (TF-TG) ENSMUSG00000031367
11889	false	-1	TF-TG	ENSMUSG00000017950 (TF-TG) ENSMUSG00000024665
24174	false	-1	TF-TG	ENSMUSG00000003545 (TF-TG) ENSMUSG00000053470
24173	false	-1	TF-TG	ENSMUSG00000003545 (TF-TG) ENSMUSG00000053216
11884	false	-1	TF-TG	ENSMUSG00000017950 (TF-TG) ENSMUSG00000024516
24167	false	-1	TF-TG	ENSMUSG00000003545 (TF-TG) ENSMUSG00000049878
11878	false	-1	TF-TG	ENSMUSG00000017950 (TF-TG) ENSMUSG00000024378
11877	false	-1	TF-TG	ENSMUSG00000017950 (TF-TG) ENSMUSG00000024354
11876	false	-1	TF-TG	ENSMUSG00000017950 (TF-TG) ENSMUSG00000024349
24163	false	-1	TF-TG	ENSMUSG00000003545 (TF-TG) ENSMUSG00000047976
24162	false	-1	TF-TG	ENSMUSG00000003545 (TF-TG) ENSMUSG00000047907
24161	false	-1	TF-TG	ENSMUSG00000003545 (TF-TG) ENSMUSG00000047797
7777	false	-1	TF-TG	ENSMUSG00000022479 (TF-TG) ENSMUSG00000030772
24160	false	-1	TF-TG	ENSMUSG00000003545 (TF-TG) ENSMUSG00000046546
7776	false	-1	TF-TG	ENSMUSG00000022479 (TF-TG) ENSMUSG00000030769
24159	false	-1	TF-TG	ENSMUSG00000003545 (TF-TG) ENSMUSG00000046242
7775	false	-1	TF-TG	ENSMUSG00000022479 (TF-TG) ENSMUSG00000030762
24158	false	-1	TF-TG	ENSMUSG00000003545 (TF-TG) ENSMUSG00000046093
11870	false	-1	TF-TG	ENSMUSG00000017950 (TF-TG) ENSMUSG00000024124
7773	false	-1	TF-TG	ENSMUSG00000022479 (TF-TG) ENSMUSG00000030717
24156	false	-1	TF-TG	ENSMUSG00000003545 (TF-TG) ENSMUSG00000045349
11867	false	-1	TF-TG	ENSMUSG00000017950 (TF-TG) ENSMUSG00000024066
24153	false	-1	TF-TG	ENSMUSG00000003545 (TF-TG) ENSMUSG00000044254
7769	false	-1	TF-TG	ENSMUSG00000022479 (TF-TG) ENSMUSG00000030543
24152	false	-1	TF-TG	ENSMUSG00000003545 (TF-TG) ENSMUSG00000043639
7768	false	-1	TF-TG	ENSMUSG00000022479 (TF-TG) ENSMUSG00000030528
24151	false	-1	TF-TG	ENSMUSG00000003545 (TF-TG) ENSMUSG00000043068
24150	false	-1	TF-TG	ENSMUSG00000003545 (TF-TG) ENSMUSG00000043004
24148	false	-1	TF-TG	ENSMUSG00000003545 (TF-TG) ENSMUSG00000042647
24146	false	-1	TF-TG	ENSMUSG00000003545 (TF-TG) ENSMUSG00000041930
7761	false	-1	TF-TG	ENSMUSG00000022479 (TF-TG) ENSMUSG00000030329
24144	false	-1	TF-TG	ENSMUSG00000003545 (TF-TG) ENSMUSG00000040852
7760	false	-1	TF-TG	ENSMUSG00000022479 (TF-TG) ENSMUSG00000030287
24143	false	-1	TF-TG	ENSMUSG00000003545 (TF-TG) ENSMUSG00000040447
7759	false	-1	TF-TG	ENSMUSG00000022479 (TF-TG) ENSMUSG00000030246
24142	false	-1	TF-TG	ENSMUSG00000003545 (TF-TG) ENSMUSG00000040084
11854	false	-1	TF-TG	ENSMUSG00000017950 (TF-TG) ENSMUSG00000023122
24141	false	-1	TF-TG	ENSMUSG00000003545 (TF-TG) ENSMUSG00000039934
7756	false	-1	TF-TG	ENSMUSG00000022479 (TF-TG) ENSMUSG00000030155
11850	false	-1	TF-TG	ENSMUSG00000017950 (TF-TG) ENSMUSG00000023043
24137	false	-1	TF-TG	ENSMUSG00000003545 (TF-TG) ENSMUSG00000039087
11849	false	-1	TF-TG	ENSMUSG00000017950 (TF-TG) ENSMUSG00000023032
24136	false	-1	TF-TG	ENSMUSG00000003545 (TF-TG) ENSMUSG00000039050
11848	false	-1	TF-TG	ENSMUSG00000017950 (TF-TG) ENSMUSG00000022947
7752	false	-1	TF-TG	ENSMUSG00000022479 (TF-TG) ENSMUSG00000030074
11847	false	-1	TF-TG	ENSMUSG00000017950 (TF-TG) ENSMUSG00000022938
7751	false	-1	TF-TG	ENSMUSG00000022479 (TF-TG) ENSMUSG00000030048
11846	false	-1	TF-TG	ENSMUSG00000017950 (TF-TG) ENSMUSG00000022900
11845	false	-1	TF-TG	ENSMUSG00000017950 (TF-TG) ENSMUSG00000022864
24131	false	-1	TF-TG	ENSMUSG00000003545 (TF-TG) ENSMUSG00000038451
24130	false	-1	TF-TG	ENSMUSG00000003545 (TF-TG) ENSMUSG00000038379
11842	false	-1	TF-TG	ENSMUSG00000017950 (TF-TG) ENSMUSG00000022836
7743	false	-1	TF-TG	ENSMUSG00000022479 (TF-TG) ENSMUSG00000029847
24126	false	-1	TF-TG	ENSMUSG00000003545 (TF-TG) ENSMUSG00000037664
32316	false	-1	TF-TG	ENSMUSG00000075304 (TF-TG) ENSMUSG00000062312
7740	false	-1	TF-TG	ENSMUSG00000022479 (TF-TG) ENSMUSG00000029814
24123	false	-1	TF-TG	ENSMUSG00000003545 (TF-TG) ENSMUSG00000037447
32313	false	-1	TF-TG	ENSMUSG00000075304 (TF-TG) ENSMUSG00000056758
7737	false	-1	TF-TG	ENSMUSG00000022479 (TF-TG) ENSMUSG00000029772
24120	false	-1	TF-TG	ENSMUSG00000003545 (TF-TG) ENSMUSG00000036913
11832	false	-1	TF-TG	ENSMUSG00000017950 (TF-TG) ENSMUSG00000022629
7736	false	-1	TF-TG	ENSMUSG00000022479 (TF-TG) ENSMUSG00000029769
32311	false	-1	TF-TG	ENSMUSG00000075304 (TF-TG) ENSMUSG00000056529
24119	false	-1	TF-TG	ENSMUSG00000003545 (TF-TG) ENSMUSG00000035901
11831	false	-1	TF-TG	ENSMUSG00000017950 (TF-TG) ENSMUSG00000022621
11829	false	-1	TF-TG	ENSMUSG00000017950 (TF-TG) ENSMUSG00000022546
32308	false	-1	TF-TG	ENSMUSG00000075304 (TF-TG) ENSMUSG00000053470
24116	false	-1	TF-TG	ENSMUSG00000003545 (TF-TG) ENSMUSG00000035357
32307	false	-1	TF-TG	ENSMUSG00000075304 (TF-TG) ENSMUSG00000053216
7731	false	-1	TF-TG	ENSMUSG00000022479 (TF-TG) ENSMUSG00000029674
32306	false	-1	TF-TG	ENSMUSG00000075304 (TF-TG) ENSMUSG00000052384
24114	false	-1	TF-TG	ENSMUSG00000003545 (TF-TG) ENSMUSG00000035279
11825	false	-1	TF-TG	ENSMUSG00000017950 (TF-TG) ENSMUSG00000022479
24112	false	-1	TF-TG	ENSMUSG00000003545 (TF-TG) ENSMUSG00000034858
7727	false	-1	TF-TG	ENSMUSG00000022479 (TF-TG) ENSMUSG00000029560
24110	false	-1	TF-TG	ENSMUSG00000003545 (TF-TG) ENSMUSG00000034773
32301	false	-1	TF-TG	ENSMUSG00000075304 (TF-TG) ENSMUSG00000050270
24109	false	-1	TF-TG	ENSMUSG00000003545 (TF-TG) ENSMUSG00000034579
7725	false	-1	TF-TG	ENSMUSG00000022479 (TF-TG) ENSMUSG00000029484
7724	false	-1	TF-TG	ENSMUSG00000022479 (TF-TG) ENSMUSG00000029470
24107	false	-1	TF-TG	ENSMUSG00000003545 (TF-TG) ENSMUSG00000034265
32298	false	-1	TF-TG	ENSMUSG00000075304 (TF-TG) ENSMUSG00000048279
11818	false	-1	TF-TG	ENSMUSG00000017950 (TF-TG) ENSMUSG00000022364
7721	false	-1	TF-TG	ENSMUSG00000022479 (TF-TG) ENSMUSG00000029413
32295	false	-1	TF-TG	ENSMUSG00000075304 (TF-TG) ENSMUSG00000047501
24103	false	-1	TF-TG	ENSMUSG00000003545 (TF-TG) ENSMUSG00000033287
11815	false	-1	TF-TG	ENSMUSG00000017950 (TF-TG) ENSMUSG00000022253
11814	false	-1	TF-TG	ENSMUSG00000017950 (TF-TG) ENSMUSG00000022235
7718	false	-1	TF-TG	ENSMUSG00000022479 (TF-TG) ENSMUSG00000029370
32293	false	-1	TF-TG	ENSMUSG00000075304 (TF-TG) ENSMUSG00000043391
24101	false	-1	TF-TG	ENSMUSG00000003545 (TF-TG) ENSMUSG00000032849
32292	false	-1	TF-TG	ENSMUSG00000075304 (TF-TG) ENSMUSG00000041930
7716	false	-1	TF-TG	ENSMUSG00000022479 (TF-TG) ENSMUSG00000029343
24099	false	-1	TF-TG	ENSMUSG00000003545 (TF-TG) ENSMUSG00000032294
11811	false	-1	TF-TG	ENSMUSG00000017950 (TF-TG) ENSMUSG00000022217
32290	false	-1	TF-TG	ENSMUSG00000075304 (TF-TG) ENSMUSG00000040852
24098	false	-1	TF-TG	ENSMUSG00000003545 (TF-TG) ENSMUSG00000031845
32289	false	-1	TF-TG	ENSMUSG00000075304 (TF-TG) ENSMUSG00000040280
24097	false	-1	TF-TG	ENSMUSG00000003545 (TF-TG) ENSMUSG00000031791
11809	false	-1	TF-TG	ENSMUSG00000017950 (TF-TG) ENSMUSG00000022180
7713	false	-1	TF-TG	ENSMUSG00000022479 (TF-TG) ENSMUSG00000029330
32287	false	-1	TF-TG	ENSMUSG00000075304 (TF-TG) ENSMUSG00000039911
11807	false	-1	TF-TG	ENSMUSG00000017950 (TF-TG) ENSMUSG00000022148
32286	false	-1	TF-TG	ENSMUSG00000075304 (TF-TG) ENSMUSG00000037820
11806	false	-1	TF-TG	ENSMUSG00000017950 (TF-TG) ENSMUSG00000022136
11805	false	-1	TF-TG	ENSMUSG00000017950 (TF-TG) ENSMUSG00000022094
32284	false	-1	TF-TG	ENSMUSG00000075304 (TF-TG) ENSMUSG00000036123
24091	false	-1	TF-TG	ENSMUSG00000003545 (TF-TG) ENSMUSG00000030074
24090	false	-1	TF-TG	ENSMUSG00000003545 (TF-TG) ENSMUSG00000029484
11802	false	-1	TF-TG	ENSMUSG00000017950 (TF-TG) ENSMUSG00000021986
7706	false	-1	TF-TG	ENSMUSG00000022479 (TF-TG) ENSMUSG00000029177
24089	false	-1	TF-TG	ENSMUSG00000003545 (TF-TG) ENSMUSG00000029330
11801	false	-1	TF-TG	ENSMUSG00000017950 (TF-TG) ENSMUSG00000021957
7705	false	-1	TF-TG	ENSMUSG00000022479 (TF-TG) ENSMUSG00000029173
32280	false	-1	TF-TG	ENSMUSG00000075304 (TF-TG) ENSMUSG00000032245
24088	false	-1	TF-TG	ENSMUSG00000003545 (TF-TG) ENSMUSG00000029161
11800	false	-1	TF-TG	ENSMUSG00000017950 (TF-TG) ENSMUSG00000021947
32279	false	-1	TF-TG	ENSMUSG00000075304 (TF-TG) ENSMUSG00000032014
11798	false	-1	TF-TG	ENSMUSG00000017950 (TF-TG) ENSMUSG00000021876
32277	false	-1	TF-TG	ENSMUSG00000075304 (TF-TG) ENSMUSG00000030246
11797	false	-1	TF-TG	ENSMUSG00000017950 (TF-TG) ENSMUSG00000021838
24084	false	-1	TF-TG	ENSMUSG00000003545 (TF-TG) ENSMUSG00000028341
32275	false	-1	TF-TG	ENSMUSG00000075304 (TF-TG) ENSMUSG00000029413
24083	false	-1	TF-TG	ENSMUSG00000003545 (TF-TG) ENSMUSG00000028186
32274	false	-1	TF-TG	ENSMUSG00000075304 (TF-TG) ENSMUSG00000028649
11794	false	-1	TF-TG	ENSMUSG00000017950 (TF-TG) ENSMUSG00000021684
24081	false	-1	TF-TG	ENSMUSG00000003545 (TF-TG) ENSMUSG00000027544
24080	false	-1	TF-TG	ENSMUSG00000003545 (TF-TG) ENSMUSG00000027534
24079	false	-1	TF-TG	ENSMUSG00000003545 (TF-TG) ENSMUSG00000027333
32270	false	-1	TF-TG	ENSMUSG00000075304 (TF-TG) ENSMUSG00000025608
24078	false	-1	TF-TG	ENSMUSG00000003545 (TF-TG) ENSMUSG00000027313
32269	false	-1	TF-TG	ENSMUSG00000075304 (TF-TG) ENSMUSG00000024665
11789	false	-1	TF-TG	ENSMUSG00000017950 (TF-TG) ENSMUSG00000021559
11788	false	-1	TF-TG	ENSMUSG00000017950 (TF-TG) ENSMUSG00000021539
24074	false	-1	TF-TG	ENSMUSG00000003545 (TF-TG) ENSMUSG00000026764
7690	false	-1	TF-TG	ENSMUSG00000022479 (TF-TG) ENSMUSG00000028943
7689	false	-1	TF-TG	ENSMUSG00000022479 (TF-TG) ENSMUSG00000028874
32264	false	-1	TF-TG	ENSMUSG00000075304 (TF-TG) ENSMUSG00000021453
32263	false	-1	TF-TG	ENSMUSG00000075304 (TF-TG) ENSMUSG00000020875
32262	false	-1	TF-TG	ENSMUSG00000075304 (TF-TG) ENSMUSG00000020715
11782	false	-1	TF-TG	ENSMUSG00000017950 (TF-TG) ENSMUSG00000021221
24068	false	-1	TF-TG	ENSMUSG00000003545 (TF-TG) ENSMUSG00000025959
11779	false	-1	TF-TG	ENSMUSG00000017950 (TF-TG) ENSMUSG00000021185
11778	false	-1	TF-TG	ENSMUSG00000017950 (TF-TG) ENSMUSG00000021094
32257	false	-1	TF-TG	ENSMUSG00000075304 (TF-TG) ENSMUSG00000019564
24065	false	-1	TF-TG	ENSMUSG00000003545 (TF-TG) ENSMUSG00000025027
11777	false	-1	TF-TG	ENSMUSG00000017950 (TF-TG) ENSMUSG00000020900
24064	false	-1	TF-TG	ENSMUSG00000003545 (TF-TG) ENSMUSG00000024887
11775	false	-1	TF-TG	ENSMUSG00000017950 (TF-TG) ENSMUSG00000020894
7679	false	-1	TF-TG	ENSMUSG00000022479 (TF-TG) ENSMUSG00000028649
11774	false	-1	TF-TG	ENSMUSG00000017950 (TF-TG) ENSMUSG00000020892
32253	false	-1	TF-TG	ENSMUSG00000075304 (TF-TG) ENSMUSG00000015647
24061	false	-1	TF-TG	ENSMUSG00000003545 (TF-TG) ENSMUSG00000024552
24060	false	-1	TF-TG	ENSMUSG00000003545 (TF-TG) ENSMUSG00000024516
11772	false	-1	TF-TG	ENSMUSG00000017950 (TF-TG) ENSMUSG00000020872
7676	false	-1	TF-TG	ENSMUSG00000022479 (TF-TG) ENSMUSG00000028634
7675	false	-1	TF-TG	ENSMUSG00000022479 (TF-TG) ENSMUSG00000028614
24058	false	-1	TF-TG	ENSMUSG00000003545 (TF-TG) ENSMUSG00000024033
11770	false	-1	TF-TG	ENSMUSG00000017950 (TF-TG) ENSMUSG00000020838
7674	false	-1	TF-TG	ENSMUSG00000022479 (TF-TG) ENSMUSG00000028602
32249	false	-1	TF-TG	ENSMUSG00000075304 (TF-TG) ENSMUSG00000014303
24057	false	-1	TF-TG	ENSMUSG00000003545 (TF-TG) ENSMUSG00000023224
24056	false	-1	TF-TG	ENSMUSG00000003545 (TF-TG) ENSMUSG00000022995
7672	false	-1	TF-TG	ENSMUSG00000022479 (TF-TG) ENSMUSG00000028576
32247	false	-1	TF-TG	ENSMUSG00000075304 (TF-TG) ENSMUSG00000004113
24055	false	-1	TF-TG	ENSMUSG00000003545 (TF-TG) ENSMUSG00000022769
11767	false	-1	TF-TG	ENSMUSG00000017950 (TF-TG) ENSMUSG00000020741
7671	false	-1	TF-TG	ENSMUSG00000022479 (TF-TG) ENSMUSG00000028555
11766	false	-1	TF-TG	ENSMUSG00000017950 (TF-TG) ENSMUSG00000020715
7670	false	-1	TF-TG	ENSMUSG00000022479 (TF-TG) ENSMUSG00000028542
32244	false	-1	TF-TG	ENSMUSG00000075304 (TF-TG) ENSMUSG00000000056
24052	false	-1	TF-TG	ENSMUSG00000003545 (TF-TG) ENSMUSG00000022629
32243	false	-1	TF-lincRNA	ENSMUSG00000068154 (TF-lincRNA) ENSMUSG00000044522
24051	false	-1	TF-TG	ENSMUSG00000003545 (TF-TG) ENSMUSG00000022555
11763	false	-1	TF-TG	ENSMUSG00000017950 (TF-TG) ENSMUSG00000020641
32242	false	-1	TF-lincRNA	ENSMUSG00000068154 (TF-lincRNA) ENSMUSG00000085329
24050	false	-1	TF-TG	ENSMUSG00000003545 (TF-TG) ENSMUSG00000022364
7666	false	-1	TF-TG	ENSMUSG00000022479 (TF-TG) ENSMUSG00000028517
32240	false	-1	TF-lincRNA	ENSMUSG00000068154 (TF-lincRNA) ENSMUSG00000102106
24047	false	-1	TF-TG	ENSMUSG00000003545 (TF-TG) ENSMUSG00000021831
11758	false	-1	TF-TG	ENSMUSG00000017950 (TF-TG) ENSMUSG00000020407
7662	false	-1	TF-TG	ENSMUSG00000022479 (TF-TG) ENSMUSG00000028415
32237	false	-1	TF-lincRNA	ENSMUSG00000068154 (TF-lincRNA) ENSMUSG00000109084
11757	false	-1	TF-TG	ENSMUSG00000017950 (TF-TG) ENSMUSG00000020402
24044	false	-1	TF-TG	ENSMUSG00000003545 (TF-TG) ENSMUSG00000020892
7660	false	-1	TF-TG	ENSMUSG00000022479 (TF-TG) ENSMUSG00000028341
32235	false	-1	TF-lincRNA	ENSMUSG00000068154 (TF-lincRNA) ENSMUSG00000097277
11755	false	-1	TF-TG	ENSMUSG00000017950 (TF-TG) ENSMUSG00000020376
7659	false	-1	TF-TG	ENSMUSG00000022479 (TF-TG) ENSMUSG00000028327
32234	false	-1	TF-lincRNA	ENSMUSG00000068154 (TF-lincRNA) ENSMUSG00000097287
11753	false	-1	TF-TG	ENSMUSG00000017950 (TF-TG) ENSMUSG00000020277
32232	false	-1	TF-lincRNA	ENSMUSG00000068154 (TF-lincRNA) ENSMUSG00000104011
32231	false	-1	TF-TG	ENSMUSG00000068154 (TF-TG) ENSMUSG00000110266
11751	false	-1	TF-TG	ENSMUSG00000017950 (TF-TG) ENSMUSG00000020230
32230	false	-1	TF-TG	ENSMUSG00000068154 (TF-TG) ENSMUSG00000109946
24038	false	-1	TF-TG	ENSMUSG00000003545 (TF-TG) ENSMUSG00000020015
11749	false	-1	TF-TG	ENSMUSG00000017950 (TF-TG) ENSMUSG00000020226
32227	false	-1	TF-TG	ENSMUSG00000068154 (TF-TG) ENSMUSG00000096472
24035	false	-1	TF-TG	ENSMUSG00000003545 (TF-TG) ENSMUSG00000019796
7651	false	-1	TF-TG	ENSMUSG00000022479 (TF-TG) ENSMUSG00000028211
32226	false	-1	TF-TG	ENSMUSG00000068154 (TF-TG) ENSMUSG00000094928
7650	false	-1	TF-TG	ENSMUSG00000022479 (TF-TG) ENSMUSG00000028186
24033	false	-1	TF-TG	ENSMUSG00000003545 (TF-TG) ENSMUSG00000019194
32224	false	-1	TF-TG	ENSMUSG00000068154 (TF-TG) ENSMUSG00000094091
24032	false	-1	TF-TG	ENSMUSG00000003545 (TF-TG) ENSMUSG00000017652
11744	false	-1	TF-TG	ENSMUSG00000017950 (TF-TG) ENSMUSG00000020092
24031	false	-1	TF-TG	ENSMUSG00000003545 (TF-TG) ENSMUSG00000015850
24030	false	-1	TF-TG	ENSMUSG00000003545 (TF-TG) ENSMUSG00000014351
11742	false	-1	TF-TG	ENSMUSG00000017950 (TF-TG) ENSMUSG00000020015
32221	false	-1	TF-TG	ENSMUSG00000068154 (TF-TG) ENSMUSG00000090891
24029	false	-1	TF-TG	ENSMUSG00000003545 (TF-TG) ENSMUSG00000014164
24028	false	-1	TF-TG	ENSMUSG00000003545 (TF-TG) ENSMUSG00000013089
11740	false	-1	TF-TG	ENSMUSG00000017950 (TF-TG) ENSMUSG00000020009
11739	false	-1	TF-TG	ENSMUSG00000017950 (TF-TG) ENSMUSG00000019942
24026	false	-1	TF-TG	ENSMUSG00000003545 (TF-TG) ENSMUSG00000011148
7642	false	-1	TF-TG	ENSMUSG00000022479 (TF-TG) ENSMUSG00000028076
11737	false	-1	TF-TG	ENSMUSG00000017950 (TF-TG) ENSMUSG00000019838
32216	false	-1	TF-TG	ENSMUSG00000068154 (TF-TG) ENSMUSG00000078954
11736	false	-1	TF-TG	ENSMUSG00000017950 (TF-TG) ENSMUSG00000019796
32215	false	-1	TF-TG	ENSMUSG00000068154 (TF-TG) ENSMUSG00000078650
24023	false	-1	TF-TG	ENSMUSG00000003545 (TF-TG) ENSMUSG00000009739
32214	false	-1	TF-TG	ENSMUSG00000068154 (TF-TG) ENSMUSG00000078515
24022	false	-1	TF-TG	ENSMUSG00000003545 (TF-TG) ENSMUSG00000006731
24021	false	-1	TF-TG	ENSMUSG00000003545 (TF-TG) ENSMUSG00000006494
11732	false	-1	TF-TG	ENSMUSG00000017950 (TF-TG) ENSMUSG00000019232
7636	false	-1	TF-TG	ENSMUSG00000022479 (TF-TG) ENSMUSG00000027995
32211	false	-1	TF-TG	ENSMUSG00000068154 (TF-TG) ENSMUSG00000074715
11730	false	-1	TF-TG	ENSMUSG00000017950 (TF-TG) ENSMUSG00000018909
7634	false	-1	TF-TG	ENSMUSG00000022479 (TF-TG) ENSMUSG00000027954
32209	false	-1	TF-TG	ENSMUSG00000068154 (TF-TG) ENSMUSG00000074282
24016	false	-1	TF-TG	ENSMUSG00000003545 (TF-TG) ENSMUSG00000005611
7631	false	-1	TF-TG	ENSMUSG00000022479 (TF-TG) ENSMUSG00000027931
32206	false	-1	TF-TG	ENSMUSG00000068154 (TF-TG) ENSMUSG00000072946
11726	false	-1	TF-TG	ENSMUSG00000017950 (TF-TG) ENSMUSG00000018752
7630	false	-1	TF-TG	ENSMUSG00000022479 (TF-TG) ENSMUSG00000027907
7629	false	-1	TF-TG	ENSMUSG00000022479 (TF-TG) ENSMUSG00000027890
7628	false	-1	TF-TG	ENSMUSG00000022479 (TF-TG) ENSMUSG00000027883
24011	false	-1	TF-TG	ENSMUSG00000003545 (TF-TG) ENSMUSG00000004113
32202	false	-1	TF-TG	ENSMUSG00000068154 (TF-TG) ENSMUSG00000072115
24009	false	-1	TF-TG	ENSMUSG00000003545 (TF-TG) ENSMUSG00000000126
11720	false	-1	TF-TG	ENSMUSG00000017950 (TF-TG) ENSMUSG00000018334
11719	false	-1	TF-TG	ENSMUSG00000017950 (TF-TG) ENSMUSG00000018042
32197	false	-1	TF-TG	ENSMUSG00000068154 (TF-TG) ENSMUSG00000070777
11717	false	-1	TF-TG	ENSMUSG00000017950 (TF-TG) ENSMUSG00000017716
7621	false	-1	TF-TG	ENSMUSG00000022479 (TF-TG) ENSMUSG00000027799
32196	false	-1	TF-TG	ENSMUSG00000068154 (TF-TG) ENSMUSG00000070407
11715	false	-1	TF-TG	ENSMUSG00000017950 (TF-TG) ENSMUSG00000017453
32194	false	-1	TF-TG	ENSMUSG00000068154 (TF-TG) ENSMUSG00000070332
7618	false	-1	TF-TG	ENSMUSG00000022479 (TF-TG) ENSMUSG00000027750
11713	false	-1	TF-TG	ENSMUSG00000017950 (TF-TG) ENSMUSG00000017165
7617	false	-1	TF-TG	ENSMUSG00000022479 (TF-TG) ENSMUSG00000027746
32192	false	-1	TF-TG	ENSMUSG00000068154 (TF-TG) ENSMUSG00000069170
11712	false	-1	TF-TG	ENSMUSG00000017950 (TF-TG) ENSMUSG00000016758
7616	false	-1	TF-TG	ENSMUSG00000022479 (TF-TG) ENSMUSG00000027737
32190	false	-1	TF-TG	ENSMUSG00000068154 (TF-TG) ENSMUSG00000068742
11710	false	-1	TF-TG	ENSMUSG00000017950 (TF-TG) ENSMUSG00000016541
7613	false	-1	TF-TG	ENSMUSG00000022479 (TF-TG) ENSMUSG00000027692
11707	false	-1	TF-TG	ENSMUSG00000017950 (TF-TG) ENSMUSG00000015850
11704	false	-1	TF-TG	ENSMUSG00000017950 (TF-TG) ENSMUSG00000015745
32183	false	-1	TF-TG	ENSMUSG00000068154 (TF-TG) ENSMUSG00000064215
11703	false	-1	TF-TG	ENSMUSG00000017950 (TF-TG) ENSMUSG00000015647
32182	false	-1	TF-TG	ENSMUSG00000068154 (TF-TG) ENSMUSG00000064202
11702	false	-1	TF-TG	ENSMUSG00000017950 (TF-TG) ENSMUSG00000015396
7605	false	-1	TF-TG	ENSMUSG00000022479 (TF-TG) ENSMUSG00000027544
32180	false	-1	TF-TG	ENSMUSG00000068154 (TF-TG) ENSMUSG00000063568
7604	false	-1	TF-TG	ENSMUSG00000022479 (TF-TG) ENSMUSG00000027534
11699	false	-1	TF-TG	ENSMUSG00000017950 (TF-TG) ENSMUSG00000015112
7603	false	-1	TF-TG	ENSMUSG00000022479 (TF-TG) ENSMUSG00000027514
32178	false	-1	TF-TG	ENSMUSG00000068154 (TF-TG) ENSMUSG00000063439
11698	false	-1	TF-TG	ENSMUSG00000017950 (TF-TG) ENSMUSG00000014599
32177	false	-1	TF-TG	ENSMUSG00000068154 (TF-TG) ENSMUSG00000063229
32176	false	-1	TF-TG	ENSMUSG00000068154 (TF-TG) ENSMUSG00000062753
11696	false	-1	TF-TG	ENSMUSG00000017950 (TF-TG) ENSMUSG00000014351
11695	false	-1	TF-TG	ENSMUSG00000017950 (TF-TG) ENSMUSG00000014303
32174	false	-1	TF-TG	ENSMUSG00000068154 (TF-TG) ENSMUSG00000062078
11694	false	-1	TF-TG	ENSMUSG00000017950 (TF-TG) ENSMUSG00000013846
32173	false	-1	TF-TG	ENSMUSG00000068154 (TF-TG) ENSMUSG00000062070
7597	false	-1	TF-TG	ENSMUSG00000022479 (TF-TG) ENSMUSG00000027435
32171	false	-1	TF-TG	ENSMUSG00000068154 (TF-TG) ENSMUSG00000061607
32170	false	-1	TF-TG	ENSMUSG00000068154 (TF-TG) ENSMUSG00000061578
11690	false	-1	TF-TG	ENSMUSG00000017950 (TF-TG) ENSMUSG00000011148
32169	false	-1	TF-TG	ENSMUSG00000068154 (TF-TG) ENSMUSG00000061531
11689	false	-1	TF-TG	ENSMUSG00000017950 (TF-TG) ENSMUSG00000011008
32168	false	-1	TF-TG	ENSMUSG00000068154 (TF-TG) ENSMUSG00000060962
7591	false	-1	TF-TG	ENSMUSG00000022479 (TF-TG) ENSMUSG00000027358
11684	false	-1	TF-TG	ENSMUSG00000017950 (TF-TG) ENSMUSG00000010362
7588	false	-1	TF-TG	ENSMUSG00000022479 (TF-TG) ENSMUSG00000027333
32163	false	-1	TF-TG	ENSMUSG00000068154 (TF-TG) ENSMUSG00000059713
11683	false	-1	TF-TG	ENSMUSG00000017950 (TF-TG) ENSMUSG00000010122
32162	false	-1	TF-TG	ENSMUSG00000068154 (TF-TG) ENSMUSG00000059540
11682	false	-1	TF-TG	ENSMUSG00000017950 (TF-TG) ENSMUSG00000009739
11681	false	-1	TF-TG	ENSMUSG00000017950 (TF-TG) ENSMUSG00000009646
7585	false	-1	TF-TG	ENSMUSG00000022479 (TF-TG) ENSMUSG00000027316
7584	false	-1	TF-TG	ENSMUSG00000022479 (TF-TG) ENSMUSG00000027313
32156	false	-1	TF-TG	ENSMUSG00000068154 (TF-TG) ENSMUSG00000058145
11674	false	-1	TF-TG	ENSMUSG00000017950 (TF-TG) ENSMUSG00000007207
7578	false	-1	TF-TG	ENSMUSG00000022479 (TF-TG) ENSMUSG00000027173
11673	false	-1	TF-TG	ENSMUSG00000017950 (TF-TG) ENSMUSG00000006800
11671	false	-1	TF-TG	ENSMUSG00000017950 (TF-TG) ENSMUSG00000006731
7574	false	-1	TF-TG	ENSMUSG00000022479 (TF-TG) ENSMUSG00000027068
32149	false	-1	TF-TG	ENSMUSG00000068154 (TF-TG) ENSMUSG00000056069
7573	false	-1	TF-TG	ENSMUSG00000022479 (TF-TG) ENSMUSG00000027006
11668	false	-1	TF-TG	ENSMUSG00000017950 (TF-TG) ENSMUSG00000006642
32147	false	-1	TF-TG	ENSMUSG00000068154 (TF-TG) ENSMUSG00000055675
7571	false	-1	TF-TG	ENSMUSG00000022479 (TF-TG) ENSMUSG00000026980
11666	false	-1	TF-TG	ENSMUSG00000017950 (TF-TG) ENSMUSG00000006494
32142	false	-1	TF-TG	ENSMUSG00000068154 (TF-TG) ENSMUSG00000055114
11662	false	-1	TF-TG	ENSMUSG00000017950 (TF-TG) ENSMUSG00000005873
7566	false	-1	TF-TG	ENSMUSG00000022479 (TF-TG) ENSMUSG00000026921
32141	false	-1	TF-TG	ENSMUSG00000068154 (TF-TG) ENSMUSG00000054967
11661	false	-1	TF-TG	ENSMUSG00000017950 (TF-TG) ENSMUSG00000005677
32140	false	-1	TF-TG	ENSMUSG00000068154 (TF-TG) ENSMUSG00000054920
7564	false	-1	TF-TG	ENSMUSG00000022479 (TF-TG) ENSMUSG00000026880
11659	false	-1	TF-TG	ENSMUSG00000017950 (TF-TG) ENSMUSG00000005611
7563	false	-1	TF-TG	ENSMUSG00000022479 (TF-TG) ENSMUSG00000026879
11658	false	-1	TF-TG	ENSMUSG00000017950 (TF-TG) ENSMUSG00000005413
11657	false	-1	TF-TG	ENSMUSG00000017950 (TF-TG) ENSMUSG00000005373
11655	false	-1	TF-TG	ENSMUSG00000017950 (TF-TG) ENSMUSG00000005320
7559	false	-1	TF-TG	ENSMUSG00000022479 (TF-TG) ENSMUSG00000026820
32134	false	-1	TF-TG	ENSMUSG00000068154 (TF-TG) ENSMUSG00000054474
11654	false	-1	TF-TG	ENSMUSG00000017950 (TF-TG) ENSMUSG00000004864
32132	false	-1	TF-TG	ENSMUSG00000068154 (TF-TG) ENSMUSG00000054200
7556	false	-1	TF-TG	ENSMUSG00000022479 (TF-TG) ENSMUSG00000026782
11651	false	-1	TF-TG	ENSMUSG00000017950 (TF-TG) ENSMUSG00000004328
7555	false	-1	TF-TG	ENSMUSG00000022479 (TF-TG) ENSMUSG00000026773
32130	false	-1	TF-TG	ENSMUSG00000068154 (TF-TG) ENSMUSG00000053765
32129	false	-1	TF-TG	ENSMUSG00000068154 (TF-TG) ENSMUSG00000053617
11649	false	-1	TF-TG	ENSMUSG00000017950 (TF-TG) ENSMUSG00000004044
7553	false	-1	TF-TG	ENSMUSG00000022479 (TF-TG) ENSMUSG00000026764
32128	false	-1	TF-TG	ENSMUSG00000068154 (TF-TG) ENSMUSG00000053470
7552	false	-1	TF-TG	ENSMUSG00000022479 (TF-TG) ENSMUSG00000026730
32127	false	-1	TF-TG	ENSMUSG00000068154 (TF-TG) ENSMUSG00000053460
11647	false	-1	TF-TG	ENSMUSG00000017950 (TF-TG) ENSMUSG00000003545
11646	false	-1	TF-TG	ENSMUSG00000017950 (TF-TG) ENSMUSG00000003541
32124	false	-1	TF-TG	ENSMUSG00000068154 (TF-TG) ENSMUSG00000052584
11644	false	-1	TF-TG	ENSMUSG00000017950 (TF-TG) ENSMUSG00000003420
32122	false	-1	TF-TG	ENSMUSG00000068154 (TF-TG) ENSMUSG00000052353
11642	false	-1	TF-TG	ENSMUSG00000017950 (TF-TG) ENSMUSG00000002885
7546	false	-1	TF-TG	ENSMUSG00000022479 (TF-TG) ENSMUSG00000026649
7545	false	-1	TF-TG	ENSMUSG00000022479 (TF-TG) ENSMUSG00000026605
7544	false	-1	TF-TG	ENSMUSG00000022479 (TF-TG) ENSMUSG00000026604
32118	false	-1	TF-TG	ENSMUSG00000068154 (TF-TG) ENSMUSG00000051314
7542	false	-1	TF-TG	ENSMUSG00000022479 (TF-TG) ENSMUSG00000026546
32116	false	-1	TF-TG	ENSMUSG00000068154 (TF-TG) ENSMUSG00000051185
7540	false	-1	TF-TG	ENSMUSG00000022479 (TF-TG) ENSMUSG00000026520
11635	false	-1	TF-TG	ENSMUSG00000017950 (TF-TG) ENSMUSG00000001467
7539	false	-1	TF-TG	ENSMUSG00000022479 (TF-TG) ENSMUSG00000026509
32111	false	-1	TF-TG	ENSMUSG00000068154 (TF-TG) ENSMUSG00000050737
32110	false	-1	TF-TG	ENSMUSG00000068154 (TF-TG) ENSMUSG00000050721
32109	false	-1	TF-TG	ENSMUSG00000068154 (TF-TG) ENSMUSG00000050270
11629	false	-1	TF-TG	ENSMUSG00000017950 (TF-TG) ENSMUSG00000000732
32108	false	-1	TF-TG	ENSMUSG00000068154 (TF-TG) ENSMUSG00000050064
11628	false	-1	TF-TG	ENSMUSG00000017950 (TF-TG) ENSMUSG00000000673
7532	false	-1	TF-TG	ENSMUSG00000022479 (TF-TG) ENSMUSG00000026447
32107	false	-1	TF-TG	ENSMUSG00000068154 (TF-TG) ENSMUSG00000049878
32105	false	-1	TF-TG	ENSMUSG00000068154 (TF-TG) ENSMUSG00000049588
11625	false	-1	TF-TG	ENSMUSG00000017950 (TF-TG) ENSMUSG00000000056
32104	false	-1	TF-TG	ENSMUSG00000068154 (TF-TG) ENSMUSG00000049580
11624	false	-1	TF-TG	ENSMUSG00000017950 (TF-TG) ENSMUSG00000037583
32103	false	-1	TF-TG	ENSMUSG00000068154 (TF-TG) ENSMUSG00000049154
7527	false	-1	TF-TG	ENSMUSG00000022479 (TF-TG) ENSMUSG00000026415
7526	false	-1	TF-TG	ENSMUSG00000022479 (TF-TG) ENSMUSG00000026405
7525	false	-1	TF-TG	ENSMUSG00000022479 (TF-TG) ENSMUSG00000026398
32100	false	-1	TF-TG	ENSMUSG00000068154 (TF-TG) ENSMUSG00000048458
32099	false	-1	TF-TG	ENSMUSG00000068154 (TF-TG) ENSMUSG00000048217
32098	false	-1	TF-TG	ENSMUSG00000068154 (TF-TG) ENSMUSG00000047963
32097	false	-1	TF-TG	ENSMUSG00000068154 (TF-TG) ENSMUSG00000047907
32096	false	-1	TF-TG	ENSMUSG00000068154 (TF-TG) ENSMUSG00000047797
32092	false	-1	TF-TG	ENSMUSG00000068154 (TF-TG) ENSMUSG00000047501
27995	false	-1	TF-TG	ENSMUSG00000005677 (TF-TG) ENSMUSG00000052131
7514	false	-1	TF-TG	ENSMUSG00000022479 (TF-TG) ENSMUSG00000026227
32089	false	-1	TF-TG	ENSMUSG00000068154 (TF-TG) ENSMUSG00000047139
27993	false	-1	TF-TG	ENSMUSG00000005677 (TF-TG) ENSMUSG00000017950
7513	false	-1	TF-TG	ENSMUSG00000022479 (TF-TG) ENSMUSG00000026223
32085	false	-1	TF-TG	ENSMUSG00000068154 (TF-TG) ENSMUSG00000046546
7509	false	-1	TF-TG	ENSMUSG00000022479 (TF-TG) ENSMUSG00000026170
32084	false	-1	TF-TG	ENSMUSG00000068154 (TF-TG) ENSMUSG00000046447
7506	false	-1	TF-TG	ENSMUSG00000022479 (TF-TG) ENSMUSG00000026107
32081	false	-1	TF-TG	ENSMUSG00000068154 (TF-TG) ENSMUSG00000046070
7505	false	-1	TF-TG	ENSMUSG00000022479 (TF-TG) ENSMUSG00000026103
7504	false	-1	TF-TG	ENSMUSG00000022479 (TF-TG) ENSMUSG00000026077
7503	false	-1	TF-TG	ENSMUSG00000022479 (TF-TG) ENSMUSG00000026072
32078	false	-1	TF-TG	ENSMUSG00000068154 (TF-TG) ENSMUSG00000045349
32075	false	-1	TF-TG	ENSMUSG00000068154 (TF-TG) ENSMUSG00000045007
7498	false	-1	TF-TG	ENSMUSG00000022479 (TF-TG) ENSMUSG00000025959
32073	false	-1	TF-TG	ENSMUSG00000068154 (TF-TG) ENSMUSG00000044674
7496	false	-1	TF-TG	ENSMUSG00000022479 (TF-TG) ENSMUSG00000025921
32071	false	-1	TF-TG	ENSMUSG00000068154 (TF-TG) ENSMUSG00000044254
7494	false	-1	TF-TG	ENSMUSG00000022479 (TF-TG) ENSMUSG00000025893
7491	false	-1	TF-TG	ENSMUSG00000022479 (TF-TG) ENSMUSG00000025790
32066	false	-1	TF-TG	ENSMUSG00000068154 (TF-TG) ENSMUSG00000043391
7490	false	-1	TF-TG	ENSMUSG00000022479 (TF-TG) ENSMUSG00000025780
32065	false	-1	TF-TG	ENSMUSG00000068154 (TF-TG) ENSMUSG00000043068
32064	false	-1	TF-TG	ENSMUSG00000068154 (TF-TG) ENSMUSG00000042797
7488	false	-1	TF-TG	ENSMUSG00000022479 (TF-TG) ENSMUSG00000025758
32061	false	-1	TF-TG	ENSMUSG00000068154 (TF-TG) ENSMUSG00000042647
7483	false	-1	TF-TG	ENSMUSG00000022479 (TF-TG) ENSMUSG00000025608
32057	false	-1	TF-TG	ENSMUSG00000068154 (TF-TG) ENSMUSG00000042115
32056	false	-1	TF-TG	ENSMUSG00000068154 (TF-TG) ENSMUSG00000041930
32051	false	-1	TF-TG	ENSMUSG00000068154 (TF-TG) ENSMUSG00000041431
32050	false	-1	TF-TG	ENSMUSG00000068154 (TF-TG) ENSMUSG00000041237
32049	false	-1	TF-TG	ENSMUSG00000068154 (TF-TG) ENSMUSG00000041219
7471	false	-1	TF-TG	ENSMUSG00000022479 (TF-TG) ENSMUSG00000025477
32045	false	-1	TF-TG	ENSMUSG00000068154 (TF-TG) ENSMUSG00000041064
32044	false	-1	TF-TG	ENSMUSG00000068154 (TF-TG) ENSMUSG00000041058
32042	false	-1	TF-TG	ENSMUSG00000068154 (TF-TG) ENSMUSG00000040918
32041	false	-1	TF-TG	ENSMUSG00000068154 (TF-TG) ENSMUSG00000040852
7463	false	-1	TF-TG	ENSMUSG00000022479 (TF-TG) ENSMUSG00000025348
32038	false	-1	TF-TG	ENSMUSG00000068154 (TF-TG) ENSMUSG00000040640
32036	false	-1	TF-TG	ENSMUSG00000068154 (TF-TG) ENSMUSG00000040447
32035	false	-1	TF-TG	ENSMUSG00000068154 (TF-TG) ENSMUSG00000040280
7458	false	-1	TF-TG	ENSMUSG00000022479 (TF-TG) ENSMUSG00000025203
32030	false	-1	TF-TG	ENSMUSG00000068154 (TF-TG) ENSMUSG00000040127
7453	false	-1	TF-TG	ENSMUSG00000022479 (TF-TG) ENSMUSG00000025176
32028	false	-1	TF-TG	ENSMUSG00000068154 (TF-TG) ENSMUSG00000039934
7452	false	-1	TF-TG	ENSMUSG00000022479 (TF-TG) ENSMUSG00000025161
7451	false	-1	TF-TG	ENSMUSG00000022479 (TF-TG) ENSMUSG00000025154
32023	false	-1	TF-TG	ENSMUSG00000068154 (TF-TG) ENSMUSG00000039470
7445	false	-1	TF-TG	ENSMUSG00000022479 (TF-TG) ENSMUSG00000025075
32020	false	-1	TF-TG	ENSMUSG00000068154 (TF-TG) ENSMUSG00000039232
7444	false	-1	TF-TG	ENSMUSG00000022479 (TF-TG) ENSMUSG00000025037
7443	false	-1	TF-TG	ENSMUSG00000022479 (TF-TG) ENSMUSG00000025027
32017	false	-1	TF-TG	ENSMUSG00000068154 (TF-TG) ENSMUSG00000039126
7441	false	-1	TF-TG	ENSMUSG00000022479 (TF-TG) ENSMUSG00000025025
32015	false	-1	TF-TG	ENSMUSG00000068154 (TF-TG) ENSMUSG00000039087
32014	false	-1	TF-TG	ENSMUSG00000068154 (TF-TG) ENSMUSG00000038903
7438	false	-1	TF-TG	ENSMUSG00000022479 (TF-TG) ENSMUSG00000024990
32013	false	-1	TF-TG	ENSMUSG00000068154 (TF-TG) ENSMUSG00000038884
7437	false	-1	TF-TG	ENSMUSG00000022479 (TF-TG) ENSMUSG00000024981
32012	false	-1	TF-TG	ENSMUSG00000068154 (TF-TG) ENSMUSG00000038843
32011	false	-1	TF-TG	ENSMUSG00000068154 (TF-TG) ENSMUSG00000038836
32008	false	-1	TF-TG	ENSMUSG00000068154 (TF-TG) ENSMUSG00000038599
32005	false	-1	TF-TG	ENSMUSG00000068154 (TF-TG) ENSMUSG00000038463
32003	false	-1	TF-TG	ENSMUSG00000068154 (TF-TG) ENSMUSG00000038451
7427	false	-1	TF-TG	ENSMUSG00000022479 (TF-TG) ENSMUSG00000024887
32002	false	-1	TF-TG	ENSMUSG00000068154 (TF-TG) ENSMUSG00000038349
7425	false	-1	TF-TG	ENSMUSG00000022479 (TF-TG) ENSMUSG00000024846
31999	false	-1	TF-TG	ENSMUSG00000068154 (TF-TG) ENSMUSG00000038042
31997	false	-1	TF-TG	ENSMUSG00000068154 (TF-TG) ENSMUSG00000037820
7421	false	-1	TF-TG	ENSMUSG00000022479 (TF-TG) ENSMUSG00000024803
31996	false	-1	TF-TG	ENSMUSG00000068154 (TF-TG) ENSMUSG00000037624
31995	false	-1	TF-TG	ENSMUSG00000068154 (TF-TG) ENSMUSG00000037606
7419	false	-1	TF-TG	ENSMUSG00000022479 (TF-TG) ENSMUSG00000024774
31993	false	-1	TF-TG	ENSMUSG00000068154 (TF-TG) ENSMUSG00000037447
7417	false	-1	TF-TG	ENSMUSG00000022479 (TF-TG) ENSMUSG00000024743
31991	false	-1	TF-TG	ENSMUSG00000068154 (TF-TG) ENSMUSG00000037386
31990	false	-1	TF-TG	ENSMUSG00000068154 (TF-TG) ENSMUSG00000037379
31989	false	-1	TF-TG	ENSMUSG00000068154 (TF-TG) ENSMUSG00000037235
31988	false	-1	TF-TG	ENSMUSG00000068154 (TF-TG) ENSMUSG00000037169
7411	false	-1	TF-TG	ENSMUSG00000022479 (TF-TG) ENSMUSG00000024665
31986	false	-1	TF-TG	ENSMUSG00000068154 (TF-TG) ENSMUSG00000037071
31985	false	-1	TF-TG	ENSMUSG00000068154 (TF-TG) ENSMUSG00000036944
7408	false	-1	TF-TG	ENSMUSG00000022479 (TF-TG) ENSMUSG00000024601
7403	false	-1	TF-TG	ENSMUSG00000022479 (TF-TG) ENSMUSG00000024552
31978	false	-1	TF-TG	ENSMUSG00000068154 (TF-TG) ENSMUSG00000035901
7401	false	-1	TF-TG	ENSMUSG00000022479 (TF-TG) ENSMUSG00000024525
31975	false	-1	TF-TG	ENSMUSG00000068154 (TF-TG) ENSMUSG00000035441
7399	false	-1	TF-TG	ENSMUSG00000022479 (TF-TG) ENSMUSG00000024516
31971	false	-1	TF-TG	ENSMUSG00000068154 (TF-TG) ENSMUSG00000035158
7391	false	-1	TF-TG	ENSMUSG00000022479 (TF-TG) ENSMUSG00000024378
31965	false	-1	TF-TG	ENSMUSG00000068154 (TF-TG) ENSMUSG00000034773
7389	false	-1	TF-TG	ENSMUSG00000022479 (TF-TG) ENSMUSG00000024354
31964	false	-1	TF-TG	ENSMUSG00000068154 (TF-TG) ENSMUSG00000034768
7387	false	-1	TF-TG	ENSMUSG00000022479 (TF-TG) ENSMUSG00000024349
31961	false	-1	TF-TG	ENSMUSG00000068154 (TF-TG) ENSMUSG00000034116
31957	false	-1	TF-TG	ENSMUSG00000068154 (TF-TG) ENSMUSG00000033530
7381	false	-1	TF-TG	ENSMUSG00000022479 (TF-TG) ENSMUSG00000024232
31956	false	-1	TF-TG	ENSMUSG00000068154 (TF-TG) ENSMUSG00000033287
31954	false	-1	TF-TG	ENSMUSG00000068154 (TF-TG) ENSMUSG00000033256
7378	false	-1	TF-TG	ENSMUSG00000022479 (TF-TG) ENSMUSG00000024124
31953	false	-1	TF-TG	ENSMUSG00000068154 (TF-TG) ENSMUSG00000033161
31952	false	-1	TF-TG	ENSMUSG00000068154 (TF-TG) ENSMUSG00000033107
31950	false	-1	TF-TG	ENSMUSG00000068154 (TF-TG) ENSMUSG00000032978
7373	false	-1	TF-TG	ENSMUSG00000022479 (TF-TG) ENSMUSG00000024074
31948	false	-1	TF-TG	ENSMUSG00000068154 (TF-TG) ENSMUSG00000032849
7372	false	-1	TF-TG	ENSMUSG00000022479 (TF-TG) ENSMUSG00000024066
31946	false	-1	TF-TG	ENSMUSG00000068154 (TF-TG) ENSMUSG00000032783
31944	false	-1	TF-TG	ENSMUSG00000068154 (TF-TG) ENSMUSG00000032754
7368	false	-1	TF-TG	ENSMUSG00000022479 (TF-TG) ENSMUSG00000024033
7367	false	-1	TF-TG	ENSMUSG00000022479 (TF-TG) ENSMUSG00000024030
7364	false	-1	TF-TG	ENSMUSG00000022479 (TF-TG) ENSMUSG00000024013
31937	false	-1	TF-TG	ENSMUSG00000068154 (TF-TG) ENSMUSG00000032314
31935	false	-1	TF-TG	ENSMUSG00000068154 (TF-TG) ENSMUSG00000032245
31929	false	-1	TF-TG	ENSMUSG00000068154 (TF-TG) ENSMUSG00000031925
31928	false	-1	TF-TG	ENSMUSG00000068154 (TF-TG) ENSMUSG00000031903
31927	false	-1	TF-TG	ENSMUSG00000068154 (TF-TG) ENSMUSG00000031891
31926	false	-1	TF-TG	ENSMUSG00000068154 (TF-TG) ENSMUSG00000031827
31923	false	-1	TF-TG	ENSMUSG00000068154 (TF-TG) ENSMUSG00000031765
31922	false	-1	TF-TG	ENSMUSG00000068154 (TF-TG) ENSMUSG00000031668
7343	false	-1	TF-TG	ENSMUSG00000022479 (TF-TG) ENSMUSG00000023224
7342	false	-1	TF-TG	ENSMUSG00000022479 (TF-TG) ENSMUSG00000023122
31917	false	-1	TF-TG	ENSMUSG00000068154 (TF-TG) ENSMUSG00000031520
7338	false	-1	TF-TG	ENSMUSG00000022479 (TF-TG) ENSMUSG00000023043
7337	false	-1	TF-TG	ENSMUSG00000022479 (TF-TG) ENSMUSG00000023032
7336	false	-1	TF-TG	ENSMUSG00000022479 (TF-TG) ENSMUSG00000023017
31911	false	-1	TF-TG	ENSMUSG00000068154 (TF-TG) ENSMUSG00000030769
7334	false	-1	TF-TG	ENSMUSG00000022479 (TF-TG) ENSMUSG00000023008
31908	false	-1	TF-TG	ENSMUSG00000068154 (TF-TG) ENSMUSG00000030155
7332	false	-1	TF-TG	ENSMUSG00000022479 (TF-TG) ENSMUSG00000022995
31907	false	-1	TF-TG	ENSMUSG00000068154 (TF-TG) ENSMUSG00000029847
7331	false	-1	TF-TG	ENSMUSG00000022479 (TF-TG) ENSMUSG00000022947
31906	false	-1	TF-TG	ENSMUSG00000068154 (TF-TG) ENSMUSG00000029769
7330	false	-1	TF-TG	ENSMUSG00000022479 (TF-TG) ENSMUSG00000022938
7329	false	-1	TF-TG	ENSMUSG00000022479 (TF-TG) ENSMUSG00000022900
7327	false	-1	TF-TG	ENSMUSG00000022479 (TF-TG) ENSMUSG00000022864
31902	false	-1	TF-TG	ENSMUSG00000068154 (TF-TG) ENSMUSG00000029674
31901	false	-1	TF-TG	ENSMUSG00000068154 (TF-TG) ENSMUSG00000029560
7324	false	-1	TF-TG	ENSMUSG00000022479 (TF-TG) ENSMUSG00000022836
31899	false	-1	TF-TG	ENSMUSG00000068154 (TF-TG) ENSMUSG00000029330
7319	false	-1	TF-TG	ENSMUSG00000022479 (TF-TG) ENSMUSG00000022769
31891	false	-1	TF-TG	ENSMUSG00000068154 (TF-TG) ENSMUSG00000028634
31890	false	-1	TF-TG	ENSMUSG00000068154 (TF-TG) ENSMUSG00000028542
7314	false	-1	TF-TG	ENSMUSG00000022479 (TF-TG) ENSMUSG00000022707
31888	false	-1	TF-TG	ENSMUSG00000068154 (TF-TG) ENSMUSG00000028517
31887	false	-1	TF-TG	ENSMUSG00000068154 (TF-TG) ENSMUSG00000028415
31886	false	-1	TF-TG	ENSMUSG00000068154 (TF-TG) ENSMUSG00000028341
31885	false	-1	TF-TG	ENSMUSG00000068154 (TF-TG) ENSMUSG00000028327
31884	false	-1	TF-TG	ENSMUSG00000068154 (TF-TG) ENSMUSG00000028186
7308	false	-1	TF-TG	ENSMUSG00000022479 (TF-TG) ENSMUSG00000022629
7307	false	-1	TF-TG	ENSMUSG00000022479 (TF-TG) ENSMUSG00000022621
31880	false	-1	TF-TG	ENSMUSG00000068154 (TF-TG) ENSMUSG00000027931
7304	false	-1	TF-TG	ENSMUSG00000022479 (TF-TG) ENSMUSG00000022555
31879	false	-1	TF-TG	ENSMUSG00000068154 (TF-TG) ENSMUSG00000027883
31878	false	-1	TF-TG	ENSMUSG00000068154 (TF-TG) ENSMUSG00000027799
7302	false	-1	TF-TG	ENSMUSG00000022479 (TF-TG) ENSMUSG00000022546
31876	false	-1	TF-TG	ENSMUSG00000068154 (TF-TG) ENSMUSG00000027746
31867	false	-1	TF-TG	ENSMUSG00000068154 (TF-TG) ENSMUSG00000027358
7290	false	-1	TF-TG	ENSMUSG00000022479 (TF-TG) ENSMUSG00000022364
7285	false	-1	TF-TG	ENSMUSG00000022479 (TF-TG) ENSMUSG00000022253
7284	false	-1	TF-TG	ENSMUSG00000022479 (TF-TG) ENSMUSG00000022235
7282	false	-1	TF-TG	ENSMUSG00000022479 (TF-TG) ENSMUSG00000022217
31856	false	-1	TF-TG	ENSMUSG00000068154 (TF-TG) ENSMUSG00000026649
31855	false	-1	TF-TG	ENSMUSG00000068154 (TF-TG) ENSMUSG00000026520
7279	false	-1	TF-TG	ENSMUSG00000022479 (TF-TG) ENSMUSG00000022208
7278	false	-1	TF-TG	ENSMUSG00000022479 (TF-TG) ENSMUSG00000022180
31853	false	-1	TF-TG	ENSMUSG00000068154 (TF-TG) ENSMUSG00000026447
31851	false	-1	TF-TG	ENSMUSG00000068154 (TF-TG) ENSMUSG00000026405
7275	false	-1	TF-TG	ENSMUSG00000022479 (TF-TG) ENSMUSG00000022148
7274	false	-1	TF-TG	ENSMUSG00000022479 (TF-TG) ENSMUSG00000022136
31847	false	-1	TF-TG	ENSMUSG00000068154 (TF-TG) ENSMUSG00000026170
31846	false	-1	TF-TG	ENSMUSG00000068154 (TF-TG) ENSMUSG00000026072
7270	false	-1	TF-TG	ENSMUSG00000022479 (TF-TG) ENSMUSG00000022094
31843	false	-1	TF-TG	ENSMUSG00000068154 (TF-TG) ENSMUSG00000025790
7262	false	-1	TF-TG	ENSMUSG00000022479 (TF-TG) ENSMUSG00000021986
31837	false	-1	TF-TG	ENSMUSG00000068154 (TF-TG) ENSMUSG00000025279
7261	false	-1	TF-TG	ENSMUSG00000022479 (TF-TG) ENSMUSG00000021957
31836	false	-1	TF-TG	ENSMUSG00000068154 (TF-TG) ENSMUSG00000025203
7260	false	-1	TF-TG	ENSMUSG00000022479 (TF-TG) ENSMUSG00000021947
31834	false	-1	TF-TG	ENSMUSG00000068154 (TF-TG) ENSMUSG00000025176
7258	false	-1	TF-TG	ENSMUSG00000022479 (TF-TG) ENSMUSG00000021876
31833	false	-1	TF-TG	ENSMUSG00000068154 (TF-TG) ENSMUSG00000025154
7257	false	-1	TF-TG	ENSMUSG00000022479 (TF-TG) ENSMUSG00000021838
7256	false	-1	TF-TG	ENSMUSG00000022479 (TF-TG) ENSMUSG00000021831
31831	false	-1	TF-TG	ENSMUSG00000068154 (TF-TG) ENSMUSG00000025027
7255	false	-1	TF-TG	ENSMUSG00000022479 (TF-TG) ENSMUSG00000021822
7254	false	-1	TF-TG	ENSMUSG00000022479 (TF-TG) ENSMUSG00000021806
31829	false	-1	TF-TG	ENSMUSG00000068154 (TF-TG) ENSMUSG00000025025
31825	false	-1	TF-TG	ENSMUSG00000068154 (TF-TG) ENSMUSG00000024601
7245	false	-1	TF-TG	ENSMUSG00000022479 (TF-TG) ENSMUSG00000021684
31820	false	-1	TF-TG	ENSMUSG00000068154 (TF-TG) ENSMUSG00000024525
31819	false	-1	TF-TG	ENSMUSG00000068154 (TF-TG) ENSMUSG00000024516
7240	false	-1	TF-TG	ENSMUSG00000022479 (TF-TG) ENSMUSG00000021559
31815	false	-1	TF-TG	ENSMUSG00000068154 (TF-TG) ENSMUSG00000024232
31814	false	-1	TF-TG	ENSMUSG00000068154 (TF-TG) ENSMUSG00000024193
7238	false	-1	TF-TG	ENSMUSG00000022479 (TF-TG) ENSMUSG00000021539
7237	false	-1	TF-TG	ENSMUSG00000022479 (TF-TG) ENSMUSG00000021477
7236	false	-1	TF-TG	ENSMUSG00000022479 (TF-TG) ENSMUSG00000021453
31811	false	-1	TF-TG	ENSMUSG00000068154 (TF-TG) ENSMUSG00000024124
7233	false	-1	TF-TG	ENSMUSG00000022479 (TF-TG) ENSMUSG00000021364
7230	false	-1	TF-TG	ENSMUSG00000022479 (TF-TG) ENSMUSG00000021280
7227	false	-1	TF-TG	ENSMUSG00000022479 (TF-TG) ENSMUSG00000021221
31800	false	-1	TF-TG	ENSMUSG00000068154 (TF-TG) ENSMUSG00000023224
31799	false	-1	TF-TG	ENSMUSG00000068154 (TF-TG) ENSMUSG00000023032
31798	false	-1	TF-TG	ENSMUSG00000068154 (TF-TG) ENSMUSG00000023017
7222	false	-1	TF-TG	ENSMUSG00000022479 (TF-TG) ENSMUSG00000021196
31797	false	-1	TF-TG	ENSMUSG00000068154 (TF-TG) ENSMUSG00000023008
[truncated: 35,067 more rows]
