# Supplementary material for: Regulatory network analysis of Paneth cell and goblet cell enriched gut organoids using transcriptomics approaches
Source: Royal Society of Chemistry journal article supplement (doi:10.1039/c9mo00130a), 2019-12-10
Supplement: c9mo00130a1.cys [file c9mo00130a1.cys › CytoscapeSession-2019_09_26-22_01/tables/36-Pan_network_lfc1.txt/SHARED_ATTRS-org.cytoscape.model.CyNetwork-36+shared+network.cytable]

CyCSV-Version	1
SUID	shared name
java.lang.Long	java.lang.String
36 shared network
62	Pan_network_lfc1.txt
36
61600	1: Cluster 1 (Score: 17.048)
61610	1: Cluster 2 (Score: 7.03)
61620	1: Cluster 3 (Score: 6.145)
61630	1: Cluster 4 (Score: 4.235)
61640	1: Cluster 5 (Score: 2.667)
40195	1: Cluster 1 (Score: 17.048)
40205	1: Cluster 2 (Score: 7.03)
40215	1: Cluster 4 (Score: 4.235)
40225	1: Cluster 5 (Score: 2.667)
40235	1: Cluster 3 (Score: 6.145)
