# Supplementary material for: Regulatory network analysis of Paneth cell and goblet cell enriched gut organoids using transcriptomics approaches
Source: Royal Society of Chemistry journal article supplement (doi:10.1039/c9mo00130a), 2019-12-10
Supplement: c9mo00130a1.cys [file c9mo00130a1.cys › CytoscapeSession-2019_09_26-22_01/tables/36-Pan_network_lfc1.txt/SHARED_ATTRS-org.cytoscape.model.CyNode-36+shared+node.cytable]

"CyCSV-Version","1"
"SUID","Chea3_Library","Chea3_Overlapping_Genes","Chea3_Rank","chea3_Score","genesymbol","isExcludedFromPaths","isInPath","MCODE_Cluster","MCODE_Node_Status","MCODE_Score","Module_Color","shared name"
"java.lang.Long","java.lang.String","java.lang.String","java.lang.Integer","java.lang.Double","java.lang.String","java.lang.Boolean","java.lang.Boolean","java.util.List<java.lang.String>","java.lang.String","java.lang.Double","java.lang.Integer","java.lang.String"
"","mutable","mutable","mutable","mutable","mutable","","","mutable","mutable","mutable","mutable",""
"36 shared node",""
"288","","",,,"4930451G09Rik","false","false","Cluster 1","Clustered","10.700000000000001","0","ENSMUSG00000022543"
"1181","","",,,"Cd244","false","false","Cluster 1","Clustered","10.588235294117647","0","ENSMUSG00000004709"
"284","","",,,"Ank","false","false","Cluster 1","Clustered","10.8","0","ENSMUSG00000022265"
"408","","",,,"Knl1","false","false","Cluster 1","Clustered","10.717948717948717","0","ENSMUSG00000027326"
"915","","",,,"Dhrs3","false","false","Cluster 1","Clustered","11.403508771929824","0","ENSMUSG00000066026"
"914","","",,,"C330021F23Rik","false","false","Cluster 1","Clustered","10.8","0","ENSMUSG00000065952"
"1681","Literature ChIP-seq,79;ARCHS4 Coexpression,616;ENCODE ChIP-seq,19;Enrichr Queries,139;ReMap ChIP-seq,112;GTEx Coexpression,1009","MDC1,ANKLE1,MT-ND5,MAML2,ENO1,TSKU,GLS,CREB3L4,DPYSL5,MYB,CYP1B1,NCKAP5,IER3,CHGB,GAMT,HES7,CACNA2D1,DNAAF1,AFAP1,RNASE4,PDZK1,HSPG2,DKK3,CLDN6,EML5,EML6,HOXB9,ZC2HC1A,RNF125,BIN1,CLDN9,HOXB4,JTB,HOXB3,PLBD1,HOXB8,PRR11,ASF1B,SHMT1,CFI,GATA4,ABCB9,DYNC2LI1,CRACR2B,PRKAR2B,CHST12,PDGFC,HMOX1,S100A14,RREB1,S100A11,PPARGC1B,PLK4,CDK17,NFE2,JUN,FZD3,ABCA5,PLK2,PLK1,EDEM2,FN1,FZD9,SLC16A10,ABCA7,FOSL1,H2AFY2,FAT4,XKR4,FERMT2,LGMN,WDR47,LPCAT1,GPT,ADM,PRSS22,RCSD1,JPH1,OSBPL10,SHF,TMEM189,FAM102A,ADAMTSL4,PBK,TCP11L1,TIMP3,TK1,EMB,DLGAP4,TEAD4,MYBPC2,ANXA1,CLUH,DUSP3,ANXA3,PGAM1,SLC2A13,MYOF,ANXA5,COPZ2,TMC8,PRSS16,ELOVL6,PTGR2,PLCB3,NCOR1,MRAS,PLCB4,SLC7A8,PXDN,MMP17,KCNMA1,ADSSL1,CKS2,SMTNL2,TKT,PPARA,PLCB1,VAMP2,MGLL,RAPGEF4,KANK1,PHLPP1,PLPPR2,PKN3,ATL1,GCNT1,FAM129A,SEZ6,DLST,AFP,PTGS2,TMEM163,FAM129B,TMEM71,FGD3,PLAGL1,FLNA,GPR157,EGLN1,EGLN3,MDH2,TMEM62,DHRS3,GUCA2A,DCBLD2,SLC8A3,CENPF,SLCO3A1,MORN4,CLCF1,FOSB,MSRB3,NCAPD2,COQ8A,YPEL3,HSPA1B,FRYL,NUCB2,CDKN3,SLC28A3,EXOC3L4,NAB2,RORA,FRY,CLU,RIMS2,FADS2,MFSD13A,EFEMP2,TUBB6,DEPTOR,FGF9,CDH2,SLCO2B1,NUDT19,NEK1,SLC25A45,HMGN3,SLC16A5,KCNH2,TLE2,PCYT2,IGFBP5,FST,ZBTB38,SEMA6D,FRMD4A,NEAT1,CACNB1,HIC2,OBSCN,MELK,S100A6,TNIK,AJUBA,KANK3,ABHD8,ITPR1,ITPR2,HMMR,GLIS2,IGSF21,PLXNA4,RBPMS,HTR1D,KY,REEP1,CXCL10,DAB1,GGCX,CDK1,MAFK,PLEKHM3,TRIM72,MOXD1,CELF2,RASGRF1,ARRB1,ZC3H6,FOXM1,SYNE2,PSTPIP1,WDR6,PGM2,UPP1,ME2,LBR,SLC37A3,INSL5,BCAS1,BOK,PLEKHG3,CERS3,PLEKHG1,ADGRV1,CKAP2L,KSR2,SPTB,PARD3B,SLC25A15,PTP4A3,PKM,BIRC5,ANG,ITGA5,GAPDH,DTL,ITGA9,SLC25A13,PLEKHH2,SEC23A,PRKAA2,SEMA3C,CCDC69,SLC5A11,CXXC5,PPM1E,THSD4,ZNRF1,ABLIM2,SH3BP1,P2RY2,TRIM47,E2F2,IGF2BP3,D2HGDH,IGF2BP2,RFFL,WASF1,ALOXE3,STOX1,JAZF1,KCNJ11,RNF24,MACC1,SYT14,FBXL16,TPD52L1,PTPN13,PTPN14,SORL1,KBTBD11,MYO1D,FRAS1,SYT12,NT5C1A,ASXL3,NAGS,PFKP,PANK3,FAM89B,DIXDC1,GDE1,MKI67,ICAM1,LGALS3,CHEK2,DAG1,LONP1,SOX9,ACAD11,CCDC92,SLC12A8,EPHA4,PAQR4,KCNK10,LIMCH1,SLC11A2,P3H1,ACSL5,ACSL3,KNL1,P3H3,MFSD11,POR,SOAT2,VDAC1,MXRA7,PLPP3,PLA1A,CDS1,MACF1,IGSF3,EPAS1,GIPR,MAGED1,TSHZ2,LPAR3,TTBK1,NEU3,RACGAP1,STC2,TSPAN4,SARAF,SNX8,TRAP1,DTNA,PYCR1,NBEAL2,GADD45G,CCDC88B,TPX2,CCDC88A,NCEH1,CYP2S1,PDE3A,KYAT1,ITM2C,CLIC5,NRP2,SLC44A2,CITED4,DIRAS2,PTPRM,SLC35F1,KIF11,PCSK5,CLYBL,GYS1,SH3PXD2A,STBD1,CTSK,ANKRD1,DLAT,LMCD1,PSD,EDN1,PACRG,TMEM150A,MRPS27,TNFRSF12A,MME,IZUMO1,ANO8,KIF24,ANO6,TUBG2,VAV1,ANO1,NR5A2,MAPT,ALDOA,FJX1,PDZRN3,DBN1,ARHGEF6,SDCCAG8,TAGLN,PVT1,AMIGO2,AKR1D1,CRIP2,CST6,RANBP3L,SH3BGR,CAP2,PTGES2,PLEKHA2,FAM189A1,GRIN1,ETNPPL,SH3RF2,TTC8,CYP2W1,KRT18,KLHL5,GPAM,QPCT,TCEA3,APBA1,ESYT1,RTN4IP1,MAMLD1,SPC24,MAD2L1,SCARB1,NDUFA10,JADE2,CELSR1,ETS1,CARF,CELSR3,SYDE2,ARHGAP44,SCGN,CHCHD3,TBC1D31,PLAU,KIF5C,CAPN2,NUSAP1,COTL1,SACS,TMEM38A,HADH,SBF2,PDE8A,TGM2,CHRNB1,CASR,GAS2L3,UNC5CL,WNT5B,KCTD1,NPNT,PLA2G15,DCTD,COL4A2,COL4A1,ANKS6,LMX1B,CARD11,RTN2,ARHGAP18,CACNA1A,SLC1A3,CACNA1C,PLD1,FUT1,NDRG1,ACACB,ACACA,CAMSAP2,ADGRG1,CCNB1,PCSK1N,PODXL,CALD1,ADGRG6,TBC1D14,CYC1,NXPH1,FAM83D,PRNP,ACBD4,CCDC138,HMGA1,CRIM1,HMGA2,ARHGAP24,COQ5,EFNA1,UEVLD,TDRD1,SDK1,NR4A3,CPS1,DLG4,BHLHE40,AMOTL2,ALPI,AMOTL1,FGFR4,DNAL1,LRP11,GPSM2,ACADVL,DOCK4,SLC2A1,HMGB2,HSPB1,CXCL1,LMNB1,TTC28,CASP7,DBP,CFAP45,HIST1H1C,ABCC4,TGIF2,CAMK1D,DDX58,PLAUR,MYRIP,ETV4,LSS,ETV5,CCNA2,TGFBR3,VGF,TBC1D4,IRF1,ADGRF5,RBMS1,CDH13,RBM20,RBMS3,LAMA5,TUFT1,RGS16,LAMA4,LAMA3,PALM3,SLC3A1,ADD3,THBS1,CLCN1,AURKB,ASB16,AURKA,HSPD1,DLL4,POLD1,ERBB2,POLD2,MXI1,NT5DC3,KLRG2,HES1,BUB1,MAPK4,CADPS,ARID3A,MEIS2,MAPK12,TICRR,FMNL2,SNTB1","254","329.0","Tead4","false","false","Cluster 1","Clustered","11.809725158562369","0","ENSMUSG00000030353"
"778","","",,,"Mis18bp1","false","false","Cluster 1","Clustered","11.085714285714285","0","ENSMUSG00000047534"
"265","","",,,"Parp8","false","false","Cluster 1","Clustered","11.8","0","ENSMUSG00000021725"
"264","","",,,"Plk2","false","false","Cluster 1","Clustered","11.314285714285713","0","ENSMUSG00000021701"
"1799","","",,,"Znrf1","false","false","Cluster 1","Clustered","10.8","0","ENSMUSG00000033545"
"516","","",,,"Kifc3","false","false","Cluster 1","Clustered","10.588235294117647","0","ENSMUSG00000031788"
"771","ARCHS4 Coexpression,723;Enrichr Queries,820;GTEx Coexpression,335","MDC1,HJURP,BUB1B,ENO1,MKI67,SMC4,SMC2,LGALS3,TUBB6,SALL2,NUSAP1,COTL1,LONP1,TGM2,IER3,CLDN6,DEPDC1B,NEIL3,MELK,S100A6,KIF20B,PRR11,SQSTM1,PIF1,TROAP,NCAPG,HMMR,NDRG1,CCNB2,LDHB,LDHA,CCNB1,RACGAP1,PODXL,PGK1,HMOX1,S100A11,PLK4,PRNP,TRAP1,JUN,CCDC138,FZD7,PLK1,FN1,HMGA2,PYCR1,FOSL1,TPX2,CYP2S1,BHLHE40,CDK1,ITM2C,PHF19,ARHGAP11A,SLC35F2,HMGB2,SLC2A1,HSPB1,KIF11,FOXM1,KIF15,LMNB1,TUBA1B,TUBA1A,RAC3,TK1,HIST1H1C,NDC1,TEAD4,HELLS,RMI2,TPI1,ANXA1,CLUH,TNFRSF12A,CKAP2L,PGAM1,PLAUR,MASTL,ETV4,CCNA2,ASPM,PLCB3,TUBB2A,PKM,PXDN,CKS2,BIRC5,ALDOA,TKT,DTL,GAPDH,DBN1,PKN3,TTK,CAPG,CENPA,THBS1,AURKB,AURKA,HSPD1,FAM129B,POLD1,POLD2,RAD54L,FLNA,IGF2BP3,CKB,IGF2BP2,BUB1,MARCKSL1,TICRR,CENPF,KRT18,CENPM,NCAPD2,SPC24,MAD2L1","697","626.0","Hmga1","false","false","Cluster 1","Clustered","11.0","0","ENSMUSG00000046711"
"1281","","",,,"Wif1","false","false","Cluster 1","Clustered","10.717948717948717","0","ENSMUSG00000020218"
"641","","",,,"Fgd3","false","false","Cluster 1","Clustered","10.676470588235293","0","ENSMUSG00000037946"
"512","","",,,"Cenpu","false","false","Cluster 1","Clustered","10.855072463768115","0","ENSMUSG00000031629"
"1662","","",,,"Cald1","false","false","Cluster 1","Clustered","10.717948717948717","0","ENSMUSG00000029761"
"382","","",,,"Bok","false","false","Cluster 1","Clustered","11.099415204678362","0","ENSMUSG00000026278"
"1530","","",,,"Kif26b","false","false","Cluster 1","Clustered","10.516483516483516","0","ENSMUSG00000026494"
"634","","",,,"Inf2","false","false","Cluster 1","Clustered","10.636363636363637","0","ENSMUSG00000037679"
"1272","Literature ChIP-seq,88;ARCHS4 Coexpression,584;ENCODE ChIP-seq,45;Enrichr Queries,320;ReMap ChIP-seq,84;GTEx Coexpression,183","RB1,MT-ND5,MAML2,STMN3,ENO1,MRGPRE,SMC4,SMC2,SAMD14,CREB3L4,MYB,CYP1B1,HOMER3,IER3,HES7,PRKCH,DEPDC1B,CLDN4,HOXB9,RBP2,TFR2,JTB,ASF1B,CDCA2,ABCB6,NCAPG,HSD11B2,CRACR2B,CHST12,RDH11,ST3GAL1,RREB1,PLK4,PRELID2,GPR17,NFE2,JUN,WNT10A,PLK1,NFATC3,FN1,ERLIN1,ABCA7,NR1D1,SLC16A13,FOSL1,SULT1B1,FXYD3,FXYD2,LYPD6B,ARHGAP9,PIGR,BTG2,PYGL,RCSD1,VSIR,LRRC31,FAM102A,PBK,TK1,EMB,HELLS,RMI2,LEFTY1,TPI1,ANXA1,CNOT6L,TPSG1,IFNGR1,ROM1,PAX4,TMC8,F2,TMEM173,GCHFR,APBB1IP,BACE1,PLCB3,RIPPLY3,TUBB2A,ANGPTL6,OAF,PXDN,CDC42EP3,CKS2,ADSSL1,PLEKHO2,VAMP2,MGLL,GRAMD1A,PLPPR2,NR1I3,NDUFA4L2,ABRACL,SNX32,GRAMD4,CENPA,FAM117B,PAPSS2,FAM117A,FGD2,PRSS50,SLC17A9,UCP2,CARNS1,FLNA,CDKN2D,EGLN1,CENPU,AOC1,EGLN3,GSN,PKLR,BIK,MOCOS,FMO5,FABP1,CENPF,CLCF1,CENPM,FOSB,RIMBP3,FRYL,NUCB2,CDKN3,BRDT,ANKRD13D,NRROS,OLFML2B,CSF1,GPR68,RAB3D,NAB2,LY75,HJURP,MFSD13A,EFEMP2,DACH1,GRB14,FCGRT,SESN1,LAMP2,CHP2,NUDT19,TNFRSF8,NEK2,PIM2,SLC25A45,SLC16A3,PLS1,KCNH2,CSGALNACT2,PIPOX,MITF,NEAT1,CACNB1,MELK,RAB37,DMWD,MFNG,NAAA,MAL,SQSTM1,SLC27A2,SLC27A5,BLM,CUL7,ABHD3,INSIG1,ILDR1,ABHD8,ITPR1,TNFRSF11A,HMMR,RAP1GAP,TKFC,PMVK,SDF2L1,GFPT2,OSBPL2,CORO2A,CXCL10,CDK1,MAFK,CNIH2,RNF186,SLC26A3,ARHGAP11A,CDCA7L,CELF2,NRARP,ARRB1,ITGAL,FOXM1,NXT2,PIK3C2B,PSTPIP1,DUSP10,PTER,UGT2A3,WDR6,ITGB7,GAL3ST2,LBR,PLA2G12A,SH2D3C,VPS37B,ARL4C,SLC25A15,ASPM,PTP4A3,PKM,ESPL1,TFDP2,LCK,BMP2K,BIRC5,ITGA5,DTL,CEBPA,SEMA3C,CCDC69,TTK,CXXC5,SELENBP1,AP3M2,ZNRF1,SH3BP1,TIFA,E2F2,TRIM47,DNAJB9,BAK1,RBBP7,ACSS1,ALOXE3,E2F8,SEC11C,JAZF1,PPP1R14C,SMOX,MACC1,FBXL16,PTPN13,MCOLN2,MYO1D,KLF7,PFKL,P2RX4,SPAG1,ATXN10,PABPC1L,TRIM31,PPP1R14D,PFKP,AHCYL2,IFITM1,PANK3,FAM89B,SLC23A1,GFI1,AQP9,MKI67,NADSYN1,IFI30,AQP3,LGALS3,RINL,FRAT2,CHEK2,SPATA24,TNFSF10,LONP1,SOX9,PDK1,RSAD2,ENTPD8,ACSL5,KNL1,MFSD11,CPT1C,ASRGL1,POR,KATNAL1,SOAT2,VDAC1,KCTD12,PFN2,SLC22A4,EPAS1,STXBP1,TTBK2,CD79B,NEU3,RACGAP1,PCBP4,STC2,TSPAN4,SNX9,ST8SIA6,B4GALNT1,KCNN4,TRPM6,CDR2,RAB11FIP5,CARMIL2,FAM78A,RAB27A,IFFO2,NBEAL2,BRI3BP,GNG13,TPX2,KYAT1,RGL1,ITM2C,TMEM151B,DHRS11,ACY1,SLC35F2,SH3KBP1,GBE1,KIF11,SLC7A11,HERPUD1,KIF15,GYS1,GLIPR1,MIS18BP1,CTSK,STBD1,CD38,QSOX1,TINAG,PSD,IZUMO4,ANO8,ANO9,CBFA2T3,RENBP,VAV1,PARP8,RAD51B,KCNU1,KIT,ALDOA,DBN1,SDCCAG8,ARHGEF6,TMPRSS3,HAAO,HDC,AMIGO2,CXCR4,CRIP1,GPC2,RAD54L,XDH,EMC9,REM2,MPZL2,IL33,PLEKHA2,LHFPL2,RIT1,STK17B,TCEA2,ESYT1,B9D2,CD68,RAMP1,SPC24,MAD2L1,CDK5R1,FOXA1,SCARB1,SAMD9L,BUB1B,JADE2,NR3C1,CELSR1,ETS1,CARF,ARHGAP40,TBC1D31,PALM,COTL1,NUSAP1,CAPN2,ZBP1,CD93,ARID5A,KCTD1,SHISA2,PLA2G15,ERN2,SELENOM,MYCN,DOK3,ODF3B,ABCG1,EMID1,RTN2,AKNA,PLGRKT,UBA5,PLD1,FBLN2,NDRG1,CCNB2,PDZD3,CCNB1,ZMAT1,NLRP6,CYC1,ANKZF1,MFAP3L,PRNP,VDR,HMGA1,TRPV2,MSN,COQ9,HSPA2,ARHGAP24,SLC2A9,GRHPR,EFNA3,NR4A3,ATG16L2,DLG4,BHLHE40,DNAJC10,PHF19,ACADVL,PLEK,HMGB2,SLC2A1,ATP2A3,YBX2,PITPNC1,LMNB1,CASP7,DBP,GRM4,ADGRE5,MCF2L,ABCD1,SUN2,ABCC4,EGFL7,URAD,PLAUR,IQCD,SSTR3,ETV5,ACTA2,FGR,CCNA2,HSH2D,RASA3,IRF1,CAT,RBMS1,LEF1,THBS1,AURKB,AURKA,NWD1,MUC2,RASD1,POLD1,MXI1,BPNT1,HES1,NCAM2,BUB1,ATOH1,R3HDML,LIMK1,ARID3A,RPIA,SLC4A8,FAM167A,PIK3IP1,XPNPEP2,TNIP3,AQP11,GALM,RBM43,ASB1","120","217.3","Myb","false","false","Cluster 1","Clustered","10.94736842105263","0","ENSMUSG00000019982"
"248","","",,,"Aurkb","false","false","Cluster 1","Clustered","10.810526315789474","0","ENSMUSG00000020897"
"375","","",,,"Nrp2","false","false","Cluster 1","Clustered","11.314285714285713","0","ENSMUSG00000025969"
"367","","",,,"Pde8a","false","false","Cluster 1","Clustered","11.099415204678362","0","ENSMUSG00000025584"
"878","","",,,"Sh2d3c","false","false","Cluster 1","Clustered","10.780000000000001","0","ENSMUSG00000059013"
"622","","",,,"Icam1","false","false","Cluster 1","Clustered","11.640522875816995","0","ENSMUSG00000037405"
"494","","",,,"Mki67","false","false","Cluster 1","Clustered","10.717948717948717","0","ENSMUSG00000031004"
"750","","",,,"Prss22","false","false","Cluster 1","Clustered","10.8","0","ENSMUSG00000045027"
"365","","",,,"Clybl","false","false","Cluster 1","Clustered","10.588235294117647","0","ENSMUSG00000025545"
"490","","",,,"Dgat2","false","false","Cluster 1","Clustered","10.709523809523809","0","ENSMUSG00000030747"
"105","","",,,"Lrp1","false","false","Cluster 1","Clustered","10.676470588235293","0","ENSMUSG00000040249"
"232","","",,,"Jade2","false","false","Cluster 1","Clustered","11.866666666666667","0","ENSMUSG00000020387"
"102","Literature ChIP-seq,106;ARCHS4 Coexpression,122;Enrichr Queries,402;ReMap ChIP-seq,191;GTEx Coexpression,184","CHIC1,MT-ND5,SPARC,FAM89A,PANK1,GLDC,SLC23A1,DIXDC1,TESK2,ENO1,GCC1,ABCA12,IFI30,CLDN1,TSKU,ICAM1,LIPE,LGALS3,GJA1,FRAT2,RASSF5,CHEK2,TNFSF10,LONP1,CYP1B1,SOX9,SAMD12,ACAD11,IER3,SLC34A2,PAQR7,PRKCH,IL1R1,DAPK2,SERPINF2,RNASE4,KNL1,SLC51B,HDHD3,CYP27A1,RBP7,RBP4,POR,RNF125,WDR81,SOAT2,PPP1R3B,LGALS12,PLBD1,ACOT1,RIN3,KCTD12,PLPP3,HPD,ACOT4,GPLD1,ENPEP,RETSAT,EPAS1,MAOA,MAGED1,SHMT1,MGST3,MGST1,APCDD1,ADH4,GUCD1,LDHA,RDH12,AGMO,SLC19A3,HMOX1,ST3GAL1,MAP9,ST3GAL2,PPARGC1B,BBS1,NFE2,TMEM86A,JUN,FZD5,FZD4,FAM78A,REG4,EDEM2,SLC33A1,CIDEA,FN1,CIDEB,PYCR1,NBEAL2,RMDN2,NR1D1,NR0B2,CIDEC,GADD45G,CCDC88B,FOSL1,ACER1,VNN1,NCEH1,GJB1,GJB4,VNN3,PKIA,SPATS2L,KYAT1,TECPR1,LGMN,ITM2C,BTG2,CITED4,ATF7IP2,TCF23,KRT23,GPT,ADM,PYGL,VSIR,HERPUD1,TMEM189,SH3PXD2A,ADAMTSL4,IMPA2,MIS18BP1,CTSL,STBD1,HNF4A,TIMP2,FFAR4,TIMP3,IDS,TK1,ACADS,EDN1,ANXA1,IZUMO4,IFNGR1,ITPK1,ELMOD3,GPBAR1,ANO6,PROX1,F2,SLC39A14,KIF27,GCHFR,APBB1IP,TMEM37,OAF,PXDN,CKS2,KIFC3,ALDOB,PLEKHO2,CD302,CRYAB,DNASE1L3,VAMP2,DBN1,MGLL,C1QA,MAGEH1,SLC43A3,AKR1D1,CXCR4,ALOX12B,CAPG,AFP,PTGS2,GRAMD4,STX11,RNF135,CST3,RXRA,SLC17A9,OS9,UCP2,ANO10,SPTSSB,RNF130,XDH,CBR3,GSN,SLC31A2,GLYCTK,GSR,NR1H3,TMCO4,DHRS3,AGT,SULF2,ALDH4A1,NUDT7,CYP2W1,SPSB1,DHRS7,GPAM,DHRS9,PCDHB16,FOSB,ETFBKMT,ESYT1,CD68,SPC24,KLB,SCARB1,ANKRD13D,NRROS,RAB3D,NAB2,HJURP,SDR9C7,NR3C1,CELSR1,ETS1,CLU,PYCARD,TGM1,SLC25A48,TUBB6,PLAU,FCGRT,BASP1,SLCO2B1,FAM174A,COTL1,HADH,SLC25A45,SBF2,FADS1,TGM2,SLC16A5,DGAT2,G6PC,PCYT2,DGAT1,FST,IGFBP2,CYBB,ATP11A,NEAT1,ARMCX3,ERN1,DOK3,GPD1,SELENOP,S100A6,NUPR1,SQSTM1,LY6E,PFKFB1,PFKFB3,NPR1,INSIG1,LPL,FBXO48,ITPR2,PLD1,NDRG2,ACACB,NDRG1,ACAT2,KLC3,ADGRG6,TBC1D14,IGFBP7,KIF3C,PRNP,HPS4,ADAP1,FBXO32,ARHGAP24,COQ5,EFNA1,ISG20,MLXIPL,CXCL10,PTPRC,PQLC1,CPS1,BHLHE40,NABP1,CPE,PYROXD2,REEP6,GALK1,MXD4,SLC25A1,TTC26,DOCK4,ACADVL,ITGAM,ITGB5,LEAP2,PDE3B,HSPB1,SLC2A2,DBI,DMKN,ITGAL,SYNE3,NKPD1,HEBP2,ALDH2,NAPRT,DDI2,ACP5,LBR,ABCD1,BOK,SMIM14,SUN2,EGFL6,TRPC1,SH2D3C,URAD,APOA1,APOA4,IQCD,VPS37B,ARL4C,PTP4A3,TBC1D4,IRF1,CAT,ALDH1A1,ITGA7,ANG,ITIH5,CEBPA,ACSS2,LRP1,CCDC69,SEMA3G,HSD17B13,THBS1,AURKB,CLN6,AURKA,SH3BP1,P2RY2,RNF39,STOM,DNAJB9,ACSS1,ALOXE3,APOC3,TTC39C,SORL1,RPIA,CTH,TRIM35,SNTB1","104","201.0","Cebpa","false","false","Cluster 1","Clustered","12.642857142857142","0","ENSMUSG00000034957"
"2022","","",,,"Serpinb6b","false","false","Cluster 1","Clustered","10.717948717948717","0","ENSMUSG00000042842"
"2021","","",,,"Gpr151","false","false","Cluster 1","Clustered","10.717948717948717","0","ENSMUSG00000042816"
"101","ARCHS4 Coexpression,1088;Enrichr Queries,388;ReMap ChIP-seq,251;GTEx Coexpression,349","CHIC1,MT-ND5,SPARC,TRIL,CWH43,ABCA12,CLDN1,ICAM1,LGALS3,GJA1,OPHN1,RASSF5,CHEK2,LONP1,CYP1B1,PLCE1,LIPK,SOX9,EPHB3,IER3,ALG2,SLC51A,MAPK8IP2,OVOL2,SYTL2,PPP1R3B,PLBD1,CYP2E1,PLPP3,BEX3,IGSF3,EPAS1,MGST3,PLA2G3,IL20RB,APCDD1,TTBK1,RDH12,PCBP3,HMOX1,RREB1,S100A11,ZBTB7C,NGFR,JUN,FZD3,TIPARP,PLK2,FZD7,FN1,PTK6,NR1D1,PARP12,GADD45G,FOSL1,ACER1,GJB4,ID4,ITM2C,COL18A1,BTG2,CCDC120,SLC35F2,ADM,JPH1,HERPUD1,CASP14,SULT1C2,CSRP2,CTSL,TIMP2,TIMP3,SEC61B,ZCCHC24,EDN1,ANXA1,MME,TNFRSF12A,ANXA3,NME5,SERPINB5,KIF27,PARP8,KIF9,KIT,PXDN,CKS2,CHST4,SAMD5,C1QA,MAGEH1,RNASEL,NDUFA4L2,CXCR4,ALOX12B,PTGS2,SLC7A3,RASSF10,TCEAL1,SPTSSB,CKB,MSX1,AAMDC,GPR157,ARNT2,EGLN3,GSN,PLEKHA2,KRT10,DHRS3,SULF2,KRT18,AGBL3,FOSB,ANKRD35,IRS1,CPOX,SDR9C7,PLAT,CELSR1,NR3C1,ETS1,CLU,GIMAP8,SYDE2,CHCHD3,ZFP30,PLAU,BASP1,DENND5A,TGM2,TMEM178B,IGFBP5,DIO1,PDGFRL,RAB30,COL4A1,LY6D,S100A6,AJUBA,PFKFB3,INSIG1,ARL3,NDRG1,KLC3,IGFBP7,FAM83B,WNT3,KLHDC2,PRNP,MGAM,TGFB2,HMGA2,MSN,SYT8,EFNA1,REEP1,CXCL10,EFNA3,AMACR,BAMBI,BHLHE40,CDK1,AMOTL2,ITGB5,TREH,FHL1,HMGB2,SLC2A1,HSPB1,NRARP,DMKN,NXT2,ME2,CERS3,TNFRSF19,PLAUR,ETV5,ARL4C,ACTA2,CCNA2,PTP4A3,GFOD1,CDHR1,IRF1,RNF32,CEBPA,TUFT1,RGS16,SEMA3F,ATP1A1,BPHL,THBS1,COCH,CLCN1,AURKB,ERBB2,RNF39,MAL2,LRIG3,SLIT2,HES2,MARCKSL1,PPP1R14C,KCNIP3,TPBG,IRX4,PTPN13,TPD52L1,COL7A1,CTH,NECTIN4","549","519.0","Hes1","false","false","Cluster 1","Clustered","11.89362945645821","0","ENSMUSG00000022528"
"229","","",,,"Slc22a4","false","false","Cluster 1","Clustered","11.08421052631579","0","ENSMUSG00000020334"
"2148","","",,,"Gfod1","false","false","Cluster 1","Clustered","10.764705882352942","0","ENSMUSG00000051335"
"736","","",,,"Chd3os","false","false","Cluster 1","Clustered","10.717948717948717","0","ENSMUSG00000043419"
"94","ARCHS4 Coexpression,257;ENCODE ChIP-seq,25;Enrichr Queries,114;ReMap ChIP-seq,66;GTEx Coexpression,1146","IL1RN,MAML2,MSANTD3,ENO1,MRGPRE,MKI67,ABCA12,IFIT3,FGFRL1,ELK3,ICAM1,MYLK,LGALS3,FRAT2,MYB,NAMPT,LONP1,PIP4K2A,CYP1B1,HOMER3,SOX9,CHAC1,HABP2,IER3,PAQR9,IL1R1,ENTPD8,ACSL5,AFAP1,CMBL,ACSL3,MFSD11,HSPG2,CLDN6,CLDN4,PPP1R3C,CLDN9,SOAT2,KCTD14,MXRA7,MYL9,STX1A,SLC22A4,EPAS1,NCAPG,LDHA,PRKAR2B,STC2,PDGFC,TSPAN4,HMOX1,KCNN4,S100A11,RAB11FIP5,PRELID2,JUN,NEBL,LRRN2,TIPARP,PLK2,SLC35E4,PLK1,FN1,NFATC2,NR1D1,FOSL1,CCDC88B,TPX2,EHD2,COL1A2,NCEH1,GJB4,SPATS2L,CDKN1C,BTG2,GBE1,TGFB1I1,ATF7IP2,ADM,KIF11,SLC7A11,PEAR1,PTPRH,PRSS22,TUBA1B,CTSL,ADAMTSL4,PBK,ANKRD1,TIMP3,ANXA8,QSOX1,TK1,EDN1,ANXA1,TNFRSF12A,ANXA3,MYOF,ANXA5,SLC39A10,SLC39A13,ANO6,GCHFR,ENAH,PLCB3,TUBB2A,INF2,DPYD,PXDN,CKS2,TLR6,KIFC3,TKT,GAS6,FJX1,TLR4,DBN1,CD63,TAGLN,SLC43A3,AKR1D1,CXCR4,TMEM160,PTGS2,CST6,GRAMD4,FAM129B,FLNA,FLNC,PLEKHA2,GSR,VEGFC,DHRS3,DCBLD2,SH3RF2,SPSB1,KRT18,DHRS9,CLCF1,FOSB,CD68,LGR5,CDKN3,SCARB1,STEAP3,CSF1,IRS1,NAB2,GUCA1A,PLOD2,PLAT,JADE2,CLU,ETS1,FADS3,TUBB6,CAPN8,FGF9,PLAU,SLCO2B1,CAPN2,NUSAP1,SACS,TNFRSF8,NEK1,SLC25A45,SBF2,SLC16A3,TGM2,KCNH2,SCARA3,PCYT2,WNT5B,ZBTB38,FST,F2R,ARID5A,SHISA4,NEAT1,PRLR,ACAP3,PROCR,MELK,COL4A1,MAP7D1,S100A6,S100A5,SCG3,NUPR1,SQSTM1,AJUBA,SHC4,PFKFB3,INSIG1,GMPR,ARHGAP18,HMMR,PLD1,FBLN2,NDRG1,SLC9A3R2,CCNB2,ADGRG1,CCNB1,KIF3C,SRGAP1,PRNP,CRTAP,ARHGEF37,VDR,CAV2,GFPT2,TFPI2,HMGA1,CRIM1,HMGA2,FBXO32,CALHM3,ARHGAP23,ISG20,CXCL10,DAP,BFSP1,DAO,NR4A3,REEP5,P4HA2,DLG4,BHLHE40,SP6,CDK1,NABP1,MAFK,AMOTL2,LRP11,PHF19,ACADVL,SLC2A1,HSPB1,LAMC2,CXCL1,LDB3,FOXM1,LMNB1,ADGRE5,ITGB7,UPP1,CFAP45,HIST1H1C,SMIM14,KSR1,TNFRSF18,ITGA2,PLAUR,IQCD,VPS37B,REXO2,ETV4,CKAP4,ARL4C,CCNA2,ALDH1A3,RCN1,TBC1D2,PKM,VGF,LCK,DDAH2,IRF1,BMP2K,BIRC5,ITGA5,ST6GALNAC4,DTL,GAPDH,HEMGN,LAMA5,LRP1,SEMA3C,TUFT1,RGS16,LAMA3,ATP1A1,CXXC5,TFPI,THBS1,AURKB,AGPAT4,AURKA,ABLIM1,SH3TC2,NT5DC3,E2F2,TRIM47,HES1,IGF2BP2,RFFL,PDLIM4,LRRC8E,SMOX,MACC1,LIMK1,AHNAK2,ARID3A,TTC39A,FMNL3,PIK3IP1,TRIM35,NECTIN4,PFKP","246","321.6","Fosl1","false","false","Cluster 1","Clustered","11.198412698412698","0","ENSMUSG00000024912"
"1244","ARCHS4 Coexpression,1078;ENCODE ChIP-seq,12;Enrichr Queries,596;ReMap ChIP-seq,64;GTEx Coexpression,323","RB1,MDC1,ANKLE1,MSANTD3,ENO1,ELK3,GLS,GJA1,EVA1B,DPYSL3,NAMPT,IER3,HES7,GABARAPL1,DHDH,SYTL1,RNASE4,HSPG2,HDHD3,EML6,CLDN4,WDR81,TYRO3,MYL9,ABCB6,SLCO5A1,CFP,DYNC2LI1,LDHA,AGMO,PDGFC,GRPEL2,HMOX1,ST3GAL1,RREB1,S100A11,FAM120AOS,GSTM4,JUN,WNT10A,GSDMA,TIPARP,MCAM,PLK2,EIF2AK3,NFATC3,NR1D1,GPR137B,FOSL1,MEX3B,SLC6A9,MRVI1,FERMT2,PCDHB7,BTG2,TGFB1I1,PRKAG2,ADM,PYGL,RCSD1,SHF,FAM102A,CASP12,TIMP2,PBK,TIMP3,DLGAP4,RMI2,DUSP3,ANXA1,CLUH,IFNGR1,ROM1,COPZ2,TMEM40,SLC39A13,SERPINB9,PTGR2,APBB1IP,MMP12,TMEM37,PLCB3,SLC7A7,INF2,TUBB2A,HEATR5A,PXDN,CDC42EP3,ADSSL1,CKS2,KIFC3,TKT,PAFAH1B3,VAMP2,KANK1,GRAMD1A,OAT,PTAFR,FAM129A,SNX32,PTGS2,FAM129B,TMEM71,FGD2,RNF135,FGD3,SLC17A9,FLNA,P4HTM,GPR157,EGLN1,EGLN3,GSN,SLC16A1,GLYCTK,GSR,MOCOS,NR1H3,DCBLD2,PSMB9,SPSB1,DHRS7,CLCF1,LYRM7,MSRB3,FOSB,YPEL3,NUCB2,ALDH1L1,ANKRD37,NRROS,CSF1,TUSC3,FAM13A,LY75,FRY,CXCL13,CLU,TNF,EFEMP2,TUBB6,HPGDS,DEPTOR,FGF9,SCMH1,LAMP2,SLC16A6,TNFRSF8,NEK1,PIM2,SLC25A45,SLC16A3,SLC16A5,PPP1R16B,KCNH3,PCYT2,ZBTB38,F2R,IGFBP2,NEAT1,ARMCX3,ACAP3,RAB30,MADD,S100A6,IGFALS,PHLDB2,SQSTM1,TRABD2B,SHC4,BLM,PFKFB3,LY96,GLIS2,PHF21B,SLC9A3R2,PMVK,HACL1,SDF2L1,RBPMS,BTN2A2,ZBTB10,BMX,KY,CXCL10,BFSP1,REEP5,DMXL2,REEP2,NFE2L3,MDM2,RNF183,PLEKHM3,SNAP25,CPQ,FHL1,APIP,NRARP,ITGAL,BICD1,SYNE2,DUSP10,LBH,PTER,SGCB,ACP6,WDR6,UPP1,LBR,SLC37A3,TRIM67,CHPF2,CKAP2L,FAM219A,KSR2,ASPM,PTP4A3,IMPACT,PKM,ITGA7,BIRC5,ANG,ITGA5,GAPDH,ALDH9A1,SMIM24,RNF32,ACSS2,FGL2,CXXC5,SRL,MROH1,DCAF17,RAB23,E2F2,IGF2BP3,FYN,IARS2,IGF2BP2,RBBP7,MROH6,RFFL,ALOXE3,SLC12A4,TRIM40,RNF24,SMOX,LYSMD2,CYP4B1,TTC39C,MCOLN2,MYO1D,PFKL,P2RX4,CTH,TRIM35,MKI67,IFIT3,ICAM1,LGALS3,C1GALT1C1,RINL,CHEK2,LONP1,TNFSF10,SOX9,CHAC1,SKP2,MFSD2A,KCNK10,IL1R1,ALG2,CMBL,KNL1,MFSD11,MAPK8IP2,GCAT,NEIL3,KATNAL1,KCNQ4,VDAC1,MXRA7,MGARP,KCTD12,ATP6V0D1,PLPP3,NUMBL,EPAS1,MAGED1,MGST3,EIF5A2,TTBK1,CD79B,STC2,TSPAN4,TSPAN2,KCNN4,SNX8,DECR1,LRRN2,PYCR1,BRI3BP,TRERF1,CIDEC,GADD45G,CCDC88B,AKR1B10,PDE3A,ITM2C,COL18A1,CLIC5,CD40,ACY1,SLC35F2,ZFAND2A,SLC7A11,HERPUD1,GLIPR1,SLC22A15,STBD1,CD38,SEC61B,CD53,NXPE3,EDN1,PACRG,TNFRSF12A,IL15,ANO6,TUBG2,RENBP,VAV1,KIF27,ENAH,ANO1,DEPDC7,KRT39,ARHGEF4,ALDOA,PDZRN3,TLR4,MPND,DNASE1L3,SDCCAG8,TAGLN,SLC43A3,HDC,HAAO,AKR1D1,SLC43A1,CRIP2,CAPG,ZDHHC21,STX11,CST3,ZFP14,RXRA,GPC1,SLC31A2,PLEKHA2,SUSD2,GRHL3,LHFPL2,KRT10,GCK,RIT1,KRT18,XK,CSDC2,TCEA2,APBA1,ESYT1,CD68,RAMP1,MEGF9,SCARB1,NRM,JADE2,CELSR1,ETS1,TMEM143,RDM1,TBC1D31,PLAU,PALM,COTL1,CAPN2,SBF2,RGS9,PDE8A,TGM2,GEN1,G6PC,TMOD2,ARID5A,SELENOM,DOK3,COL4A2,COL4A1,MAP7D1,GPD1,SELENOP,NUPR1,RASL12,NDRG4,ARHGAP18,CACNA1C,PLD1,NDRG1,RASGRP3,TMEM243,CALD1,UAP1L1,TBC1D14,H1FX,KIF3C,MORC1,ANKZF1,PACSIN1,KLHDC2,PRNP,FDPS,TGFB2,ARHGEF37,ARHGEF39,HMGA1,CRIM1,MSN,DNAJC12,BMP6,TMEM231,DNAJC18,ARHGAP23,ISG20,NR4A3,ATG16L2,DLG4,CCPG1,PQLC3,BHLHE40,NABP1,AMOTL2,LRP11,ACADVL,HSPB8,PDE3B,SLC2A1,ATP2A3,SLC2A2,HSPB1,LDB3,PKD1,LMNB1,TTC28,CASP7,DBP,CASP1,SCARF2,ABCD1,CFAP45,HIST1H1C,PLAUR,ETV1,SYNGR4,ETV4,DNM1,ETV5,TAPBP,SETBP1,IRF1,RBM20,PDE5A,CFAP54,RBMS3,LAMA5,KDM3A,TUFT1,THBS1,AURKB,CLN6,ASB16,AURKA,HSPD1,GNG2,ALDH1B1,MXI1,MVB12B,ATOH8,NT5DC3,PDLIM4,FAHD1,SGTB,BNIP3,TPBG,ARID3A,SUOX,SLC4A7,RBM43","392","414.6","Mafk","false","false","Cluster 1","Clustered","11.03448275862069","0","ENSMUSG00000018143"
"1500","","",,,"Lypla1","false","false","Cluster 1","Clustered","11.314285714285713","0","ENSMUSG00000025903"
"603","ARCHS4 Coexpression,839;Enrichr Queries,45;GTEx Coexpression,528","IFITM1,SPARC,ROGDI,KLHL32,PLAT,CELSR1,MKI67,CNDP1,ICAM1,PYCARD,LGALS3,PAIP2B,GJA1,DPYSL5,BASP1,CHEK2,LAMP2,DPYSL3,MYB,ADORA1,LONP1,PIP4K2A,CYP1B1,DENND5A,CHAC1,PIM2,FADS1,TGM2,IER3,TMEM88B,EPHA4,POSTN,PAQR4,RSAD2,IGFBP5,FST,APLP1,WNT5A,F2R,IGFBP2,SHISA2,MTURN,CLDN4,MYCN,COL4A2,SOAT2,COL4A1,RAB37,MFNG,LGALS12,SERPING1,NUPR1,MYL9,PHLDB2,EMID1,PDE1C,EPAS1,CACNA1A,LPL,NDRG1,NID2,RASGRP3,CCNB1,CALHM2,DPP7,HMOX1,IGFBP7,NPTX2,RAB11FIP4,LHPP,NKX2-2,CDK18,NFE2,JUN,PLK2,MCAM,GFPT2,FN1,IGF2,FZD9,ST18,AIF1L,QDPR,FA2H,CXCL10,PEX5L,COL1A2,PQLC3,BHLHE40,CD200,KCNK5,CDKN1C,COL18A1,BTG2,SLC2A1,HSPB1,LAMC2,CXCL1,TFCP2L1,SLC7A11,RCSD1,LIMD2,SLC22A15,TUBA1A,CSRP2,NAPRT,TIMP3,CD38,PRKG2,UPP1,ACADS,BCAS1,ZCCHC24,CD53,EDN1,EGFL7,MME,ANXA3,ROM1,ITPK1,MYOF,PLAUR,TMC8,OLIG1,TMEM173,ETV4,CBFA2T3,ZDHHC14,ETV5,ACTA2,GPRC5B,FAM222A,PTP4A3,PXDN,KIT,CAT,ITGA5,RAPGEF5,CRYAB,AMER2,SMIM24,TAGLN,SLC43A3,RGS16,SLC5A11,FAM129A,CXCR4,PTGS2,ADD3,THBS1,AURKB,AGPAT4,FAM117A,SH3TC2,SLC17A9,PLAGL1,MVB12B,CARNS1,PRRG1,UCP2,KLRG2,CKB,FLNC,IL12RB1,RNF130,GDF11,IL33,MARCKSL1,PLCL1,VEGFC,DHRS3,SULF2,RPIA,COL3A1,FMNL2,KIF26B,PCDHB16,FOSB,TMEM229A,ASB1","478","470.7","Zfp57","false","false","Cluster 1","Clustered","11.219158200290275","0","ENSMUSG00000036036"
"2011","","",,,"Ago4","false","false","Cluster 1","Clustered","11.472527472527473","0","ENSMUSG00000042500"
"2137","","",,,"Tnfsf15","false","false","Cluster 1","Clustered","11.604395604395604","0","ENSMUSG00000050395"
"601","","",,,"Gramd4","false","false","Cluster 1","Clustered","10.676470588235293","0","ENSMUSG00000035900"
"89","","",,,"Rb1","false","false","Cluster 1","Clustered","11.852941176470589","0","ENSMUSG00000022105"
"87","","",,,"Mdm2","false","false","Cluster 1","Clustered","11.221052631578948","0","ENSMUSG00000020184"
"86","Literature ChIP-seq,113;ARCHS4 Coexpression,460;ENCODE ChIP-seq,102;Enrichr Queries,690;ReMap ChIP-seq,190;GTEx Coexpression,622","RB1,MDC1,MT-ND5,ANKLE1,MAML2,TMEM94,TESK2,ABAT,ENO1,SMC4,PTPDC1,GLS,SMC2,FAM122B,CREB3L4,NAMPT,MYB,EPSTI1,AP1S2,PIP4K2A,NCKAP5,MNX1,XYLB,IER3,GAMT,TSPYL2,DNAAF3,DNAAF1,DHDH,AFAP1,SYTL2,CLDN6,DEPDC1B,EID2,HOXB9,CLDN9,TEP1,LGALS12,HOXB4,JTB,HOXB3,SERPING1,HOXB8,PRR11,CDCA2,RETSAT,ABCB6,SHMT1,NCAPG,ABCB9,CFP,DYNC2LI1,LDHB,LDHA,CRACR2B,RDH11,KCNQ1OT1,PDGFC,HMOX1,S100A11,SLC19A1,LHPP,GSTM4,PLK4,NFE2,PRELID2,JUN,TIPARP,MCAM,EDEM2,FN1,ABCA7,NR1D1,FOSL1,EHD2,SLC6A9,CYP1A1,ARHGAP9,DENND1C,BTG3,BTG2,WDR47,ATF7IP2,ADM,RCSD1,VSIR,TMEM189,TK1,HELLS,RMI2,LYPLA1,ANXA1,DUSP3,ACTL6B,ANXA3,IFNGR1,MYOF,ROM1,COPZ2,TMC8,ELMOD3,SERPINB9,PTGR2,APBB1IP,FAM210A,PLCB3,SLC7A7,INF2,NCOR1,BDH2,TUBB2A,OAF,PXDN,MMP17,DPYD,PLEKHO2,TKT,GRAMD1A,RNASEL,OAT,PLPPR2,PTAFR,FAM129A,DLST,PTGS2,FGD2,FAM129B,FGD3,ALOX5,PLAGL1,SC5D,CKB,IL12RB1,TAF9B,RNF130,EGLN3,GSN,AGK,GLYCTK,GSR,MOCOS,NR1H3,TMEM62,TMCO4,FMO4,SLC8B1,DHRS3,PSMB9,STXBP5L,SPSB2,CENPF,DHRS7,SPSB1,DHRS9,OSTM1,CLCF1,LPCAT3,LYRM7,FOSB,COQ8A,HSPA1B,NUCB2,YPEL3,CDKN3,TMEM229B,ANKRD37,EXOC3L4,CSF1,RAB3D,NAB2,FAM13A,FBXO21,TNF,MFSD13A,EFEMP2,TUBB6,DEPTOR,FCGRT,LAMP2,TNFRSF8,NEK1,SLC25A43,PIM2,SLC25A45,SLC16A3,HMGN3,SLC16A5,PLS1,PPP1R16B,MYLIP,RAB2B,PCYT2,DGAT1,ZBTB38,CSGALNACT2,F2R,NEAT1,CDC25C,MELK,MFNG,DMWD,S100A6,ADAM8,SLC25A53,SQSTM1,PHLDB2,LY6E,BLM,PFKFB3,ABHD3,INSIG1,TROAP,ABHD8,CREM,GMPR,LY96,GSTT1,HMMR,SLC9A3R2,TKFC,NACC2,PMVK,TNFRSF14,TMEM120B,SDF2L1,ZBTB10,TOR1B,PTPRE,CXCL10,MLXIPL,MFHAS1,PTPRC,GGCX,REEP5,P4HA1,P4HA2,CDK1,SP5,ACO2,REEP6,PLEKHM3,KCNK5,MIPEP,KCNK6,SNAP25,RNF11,ITGAM,CPQ,ONECUT3,AKAP8L,PTPN22,ITGAL,NADK2,PSTPIP1,DUSP10,LBH,PTER,ITGB7,UPP1,ME2,SLC37A4,SLC37A3,SLC36A1,TRIM62,PLA2G12A,CHPF2,TRPC1,SH2D3C,LIX1L,VPS37B,REXO2,NIPSNAP1,SLC25A15,ASPM,IMPACT,PKM,TFDP2,BIRC5,ST6GALNAC4,ALDH9A1,SLC25A13,RNF32,SEC23A,CCDC69,FGL2,TTK,CXXC5,BPHL,COCH,AP3M2,SLC25A29,SH3BP1,TIFA,E2F2,D2HGDH,IARS2,BAK1,RFFL,UBQLN2,MARCKSL1,SMOX,IDH3G,MACC1,CCDC58,AHNAK2,FOXJ1,CTNS,TPD52L1,CPPED1,BAIAP3,MYO1D,SYT11,SERHL,TRIM35,SPAG1,TRIM38,UNC79,PFKP,CPNE8,IFITM1,FAM89B,FAM89A,SLC23A1,AQP9,GCC1,IFI30,NADSYN1,IFIT3,CISD3,ICAM1,LGALS3,C1GALT1C1,FRAT2,CHEK2,RASSF5,SPATA24,TNFSF10,LONP1,KIF21A,CHAC1,SKP2,PDK1,RSAD2,SLC11A2,ACSL5,ENTPD8,KNL1,ACSL3,MFSD11,NEIL3,IFI27,RRAGB,SUCLG2,RIN3,KIF20B,STX1A,PTGES,BEX4,RWDD2A,IGSF3,GIPR,EPAS1,ARX,PIK3R3,NEU3,TSPAN4,SNX9,KCNN4,BBS1,TRAP1,PTPRN2,FAM78A,SLC35E4,RAB27A,PTK6,NBEAL2,PYCR2,PARP12,NET1,CCDC88B,MSRA,CYP2S1,KYAT1,ITM2C,CD40,ECM1,DHRS11,ACY1,SLC44A2,ZFAND2A,CITED4,PCSK9,SLC7A11,KIF11,CLYBL,LIMD2,KHK,KIF15,SERP2,SCML2,CTSL,CD38,IDS,FFAR2,DLAT,ACADS,CD53,PSD,EDN1,ATP6V0B,TMEM150A,MRPS27,TNFRSF12A,IL15,IZUMO1,ANO8,KIF24,SLC35G1,CBFA2T3,VAV1,ZDHHC14,PARP8,PDRG1,RAD51B,DEPDC7,TLR6,ALDOA,TLR4,TLR2,NAPB,CD63,SLC43A3,AMIGO2,CXCR4,ZDHHC24,CAPG,CRIP1,STX11,RASIP1,CST3,ZFP14,OS9,HSF2,RAD54L,MSX1,EMC9,SH3BGR,LHFPL5,KRT10,ALDH4A1,HIST3H2A,GPAM,STK17B,SGSM3,KLHL7,B9D1,ESYT1,RTN4IP1,B9D2,MEGF9,SCARB1,SAMD9L,STEAP3,NARF,CD83,ACAA2,ZFAND4,ZWILCH,NDUFA10,KLHL32,NRM,BUB1B,OGDHL,ETS1,GIMAP8,TMEM143,RDM1,SYDE2,RGS5,PLAU,FAM162A,CCRL2,COTL1,NUSAP1,DENND5A,TGM2,ENPP7,ZBP1,CYBB,SDHA,RUNDC3A,ERN1,DOK3,SELENOS,TMEM139,GPRIN1,FAM185A,ODF3B,ANKS6,NUPR1,RELL2,RTN2,AKNA,PLGRKT,PLD1,NDRG2,FUT1,NDRG1,CCNB2,DPP7,NLRP6,ALDH3B1,UAP1L1,H1FX,CYC1,FAM83D,SYT5,KLHDC2,PRNP,FDPS,TGFB2,ACBD4,CAV2,VDR,CCDC136,EPHX2,TRPV2,HMGA1,SSC5D,KLHL23,COQ9,ARHGAP23,ISG20,UEVLD,QDPR,AMACR,ATG16L2,CPS1,PQLC1,DLG4,BAMBI,PQLC3,BHLHE40,DNAJC10,NABP1,EBPL,AMOTL2,DNAL1,GALK1,LRP11,ABCD4,TTC26,GPSM2,ACADVL,THRB,THRA,PLEK,PDE3B,SLC2A1,ATP2A3,HSPB1,SLC2A2,CXCL1,SLC2A6,HEBP2,CASP7,DBP,ADGRE5,ALDH2,NAPRT,CASP1,IFT57,ABCD1,CFAP45,HIST1H1C,SUN2,EGFL7,DDX58,MARS2,PLAUR,H2AFV,IQCD,GPCPD1,LSS,SPIDR,TAPBP,FGR,HSH2D,RASA3,GFOD1,DDAH2,IRF1,OAS3,ATP6V1B2,LAMA5,RGS14,RGS13,RGS16,LEF1,ATP1A1,THBS1,USP18,AURKB,CLN6,AGPAT4,DLL4,MXI1,POLD2,NT5DC3,NRIP3,HES1,BPNT1,BUB1,QPCTL,ARID3A,SUOX,UFM1,XPNPEP1,CFAP36,RBM43,SNTB1,ASB1","305","362.8","Irf1","false","false","Cluster 1","Clustered","10.540384615384616","0","ENSMUSG00000018899"
"85","ARCHS4 Coexpression,71;Enrichr Queries,415;GTEx Coexpression,359","SPARC,CWH43,ABCA12,CLDN1,IFIT3,ICAM1,LGALS3,CHEK2,LONP1,LIPK,SOX9,CHAC1,SCN1B,MFSD2A,EPHB3,IER3,TSPYL2,GABARAPL1,UNC5A,CTRB1,MAPK8IP2,HPCAL4,MTURN,MAPK8IP1,CLDN4,CLPS,PPP1R3C,SOAT2,MAP1A,SERPING1,PLPP3,STX1A,EPAS1,STXBP1,PLA2G3,IL20RB,APCDD1,RDH12,HMOX1,PPARGC1A,RAB11FIP5,CDK18,JUN,GSDMA,PTPRN2,PLK2,TREX2,FN1,IFFO2,GADD45G,FOSL1,ACER1,GJB4,LYPD6B,ITM2C,BTG2,TMEM151B,KCNC1,SLC35F2,PTPRN,KRT23,ADM,PRSS22,HERPUD1,CASP14,MAP1LC3A,FAM102A,SLC22A17,TIMP3,IDS,KIF1A,CTSF,TMED6,PSD,ANXA1,TNFRSF12A,SYP,SERPINB5,SYN1,PXDN,GAS6,CRYAB,MGLL,VAMP2,ALOX12B,PTGS2,PHYHIP,RASSF10,CAMK2N1,SPTSSB,CKB,APBB1,GABRD,EGLN3,GSN,KRT10,FMO4,TUBB4A,DHRS3,SULF2,GRIN1,COL3A1,SPSB1,PCDHB16,TCEA3,FOSB,ANKRD35,CSF1,RORA,SDR9C7,NR3C1,CELSR1,CLU,HID1,PALM,FAM3B,PPFIA4,FADS1,TGM2,CPA2,TLE2,SPINK1,IGFBP5,IGFBP2,SHISA4,RUNDC3A,CLIP3,ACAP3,S100A6,NUPR1,SQSTM1,BRSK1,NDRG4,PFKFB3,ARHGEF25,NXPH4,INSIG1,CACNA1A,LPL,NDRG2,CPLX2,NDRG1,NPAS2,RAP1GAP,KLC3,ADGRG1,FAM83B,WNT3,PACSIN1,PRNP,TRPV3,FBXO32,SYT8,SYT7,GNAO1,CXCL10,EFNA3,NR4A3,DLG4,RCAN2,BHLHE40,SP6,PNLIPRP1,PNLIPRP2,ACADVL,THRA,HSPB8,RASGRF1,SLC2A1,HSPB1,DMKN,PKD1,NKPD1,SYNE1,DBP,GRM4,UPP1,HIST1H1C,CERS3,TNFRSF19,DNM1,PTP4A3,DCT,CDHR1,IRF1,CRY2,ALDH1A1,CAMK2B,KDM3A,TUFT1,PLA2G1B,RGS16,ATP1A1,THBS1,AURKB,DDN,ABLIM1,ABLIM2,RNF39,HES1,ALOXE3,PLA2G2F,PPP1R14C,IRX4,AHNAK2,FBXL16,PTPN13,SORL1,COL7A1,TRIM35,NECTIN4","204","281.7","Nr1d1","false","false","Cluster 1","Clustered","12.333333333333334","0","ENSMUSG00000020889"
"1109","","",,,"Slfn2","false","false","Cluster 1","Clustered","10.516483516483516","0","ENSMUSG00000072620"
"980","","",,,"Kctd12","false","false","Cluster 1","Clustered","10.588235294117647","0","ENSMUSG00000098557"
"82","","",,,"Ppargc1a","false","false","Cluster 1","Clustered","11.0","0","ENSMUSG00000029167"
"1744","","",,,"Egln1","false","false","Cluster 1","Clustered","11.948529411764705","0","ENSMUSG00000031987"
"336","","",,,"Lmnb1","false","false","Cluster 1","Clustered","10.8","0","ENSMUSG00000024590"
"79","Literature ChIP-seq,36;ARCHS4 Coexpression,262;ENCODE ChIP-seq,41;Enrichr Queries,760;ReMap ChIP-seq,203;GTEx Coexpression,1181","RB1,MT-ND5,MAML2,GLDC,ENO1,TSKU,MYLK,ZC3H12C,GJA1,CREB3L4,DPYSL5,NAMPT,DPYSL3,PLCE1,IER3,HOXA4,CHGB,HES7,GAMT,GABARAPL1,STARD4,UNC5A,DAPK2,SERPINF2,PRKCA,HOGA1,PDZK1,HSPG2,ISL1,DKK3,CLDN6,ZC2HC1C,RNF125,WDR81,CLDN9,MAP1B,JTB,ACOT1,HPD,CDCA2,IL20RB,LDHA,CYB5R3,CRACR2B,AGMO,PDGFC,HMOX1,S100A14,ST3GAL1,SLC19A1,SLC19A2,FZD1,NGFR,CDK18,JUN,TIPARP,PLK2,FZD7,MCAM,FN1,EIF2AK3,NFATC2,ABCA7,SLC16A10,NR1D1,FOSL1,EHD2,FA2H,MEX3B,COL1A2,H2AFY2,PKIA,FERMT2,ARHGAP9,MESP2,RET,BTG2,KCNC1,ADM,TFCP2L1,PYGL,HIF3A,PEAR1,RCSD1,JPH4,TMEM189,C1QTNF1,TUBA1A,ADAMTSL4,IMPA2,ANXA6,TIMP2,TIMP3,NEFL,ANXA8,TK1,EMB,NDC1,LEFTY1,LYPLA1,TPI1,ANXA1,IFNGR1,MYOF,ANXA5,ITPK1,COPZ2,SLC39A13,F2,PTGR2,SIRT3,RIPPLY3,SLC7A7,INF2,PLCB4,PXDN,CDC42EP3,DPYD,PLSCR4,KCNMA1,ADSSL1,SLC29A4,PLEKHO2,TKT,RAPGEF5,PAFAH1B3,CRYAB,VAMP2,MGLL,GRAMD1A,ATL1,FAM129A,SNX33,PTGS2,FAM117B,FAM129B,RNF130,EGLN1,EGLN3,GSN,ANKIB1,GSR,GPR4,NMNAT2,DHRS3,GUCA2A,DCBLD2,SULF2,SPSB2,SNX16,CLCF1,RIMBP2,FOSB,NUCB2,RAB3C,EXOC3L4,IRS1,RAB3D,NAB2,FAM13A,LY75,GUCA1A,RORA,FBXO21,CLU,TNF,HID1,EFEMP1,GRB14,SALL2,CDH2,FCGRT,SLCO2B1,TNFRSF8,PLS3,TNR,SLC25A45,SLC16A3,LZTS1,FADS1,SLC16A5,KCNH2,EPM2A,PPP1R16B,SEMA6A,KCNH6,ZBTB38,CSGALNACT2,MITF,VRK2,NEAT1,CACNB1,DISP2,HIC2,OLFM1,RAB30,S100A6,S100A5,SQSTM1,KANK3,SHC4,PFKFB3,INSIG1,ABHD8,ITPR1,CREM,FBXO48,ITPR2,SLC38A11,SLC9A3R2,SNN,SRGAP1,KCNF1,HTR1D,BFSP1,PTPRC,NBEA,P4HA2,MDM2,CPE,SPIRE1,MAFK,KCNK6,SNAP25,TRIM72,PSCA,ITGB5,CELF2,RASGRF1,CELF3,ARRB1,ETFA,MSLN,SYNE3,SYNE2,PIK3C2B,SYNE1,DSE,UGT2A3,UPP1,SLC37A4,SLC36A1,SLC13A2,KSR1,VPS37B,SPTB,NIPSNAP1,ARL4C,PTP4A3,ADORA2A,BIRC5,ITGA5,GAPDH,SEMA3C,CCDC68,CCDC69,LRP3,SEMA3E,CXXC5,CXXC4,SELENBP1,ABLIM1,TIFA,NHS,TRIM47,DNAJB9,FYN,IGF2BP3,RBBP7,BAK1,RFFL,BCO1,ALOXE3,UBQLN2,MARCKSL1,PPP1R14C,PRRX1,SMOX,CCDC58,KCNJ16,MBOAT2,FBXL16,SYT13,PTPN14,MCOLN2,SORL1,CPPED1,KBTBD11,MAB21L3,KLF7,NFASC,SYT12,P2RX2,CTH,TRIM35,NECTIN3,AHCYL2,SPARC,FAM89B,SLC23A1,AQP9,DIXDC1,CBLB,CISD3,ICAM1,RINL,RASSF5,KIF21A,SOX9,SKP2,PDK1,EPHA5,SLC6A19,RSAD2,IL1R1,LIMCH1,TM4SF4,ACSL3,CYP27A1,POR,PPP1R3C,MALL,GSAP,KCTD12,MGARP,PLPP3,STX1A,TRIM11,PTGES,MACF1,BEX3,EPAS1,SLC22A1,MGST1,RACGAP1,PCBP3,SLAMF9,TSPAN4,SNX9,FAM43A,DECR1,RASSF9,BRI3BP,CIDEC,TPX2,ATP4A,PEX5L,NCEH1,AKR1B10,TH,MYO5B,PDE3A,KYAT1,RGL1,ITM2C,CD40,TMEM151B,SH3KBP1,SLC44A2,GBE1,ICA1,PCSK9,SLC7A11,PCSK5,HERPUD1,KHK,SERP2,GYS1,GLIPR1,MIS18BP1,ANKRD1,CD53,EDN1,TMEM150A,MRPS27,TNFRSF12A,ANO8,ANO6,GFRA1,ENAH,SYNC,TLR4,DNASE1L3,PVT1,AMIGO2,AKR1D1,CXCR4,CAPG,CRIP2,CRIP1,GNAI1,STX11,CST3,RXRA,DZANK1,GPC1,TM4SF20,PLEKHA2,VEGFC,LHFPL2,PDZK1IP1,SORBS3,TTC8,KRT18,KLHL5,GPAM,STK17B,KIF26B,PCDHB16,FKBP1B,ESYT1,CD68,SPC24,MEGF9,KLB,SCARB1,NARF,CD83,CD80,GALNT18,NDUFA10,JADE2,ETS1,CNDP1,RGS5,CAPN8,CHCHD3,PLAU,BASP1,CCRL2,CAPN2,COTL1,SBF2,PDE8A,TGM2,SPINK4,PDGFRL,PDIA5,ERN1,SELENOS,FAM185A,ODF3B,ANKS6,SCG2,RTN2,FBLN1,PLD1,NDRG1,CACNA1H,DPP7,SCUBE1,CALD1,PODXL,ALDH3B1,ADGRG6,ISOC1,H1FX,CYC1,MORC1,PRNP,MGAM,ACBD4,ARHGEF39,CRIM1,HMGA2,MSN,SYT8,ARHGAP24,EFNA1,ISG20,SLC2A9,GRHPR,EFNA3,NR4A3,FGF14,DLG4,BAMBI,BHLHE40,NABP1,AMOTL2,FGFR4,GALK1,PHF19,PRR5,TTC26,ACADVL,THRA,PLEK,SLC2A1,HSPB1,SLC2A4,SLC2A6,RND1,MCF2L,BDKRB2,CASP1,IFT57,CFAP45,HIST1H1C,SUN2,PLAUR,IQCD,SSTR1,GPCPD1,UPK3B,ETV4,KLF15,ETV5,CREB3,RCN1,VGF,GFOD1,IRF1,OAS3,CAT,CRY2,RBMS1,CDH16,SHANK2,RBMS3,LAMA5,KDM3A,SLC3A1,CRMP1,ADD3,USP18,THBS1,AURKB,AURKA,HSPD1,ATOH8,NT5DC3,STOM,NRIP3,HES1,SLIT2,BUB1,CHGA,CMTM3,TPBG,LIMK1,CADPS,MEIS2,MAPK12,MAPK11,SLC4A8,FAM167A,PIK3IP1,COL7A1,FAM131A","387","413.8","Nr3c1","false","false","Cluster 1","Clustered","12.163461538461538","2","ENSMUSG00000024431"
"847","","",,,"Hmgb2","false","false","Cluster 1","Clustered","11.085714285714285","0","ENSMUSG00000054717"
"335","","",,,"Me2","false","false","Cluster 1","Clustered","10.523809523809524","0","ENSMUSG00000024556"
"2126","","",,,"Arhgap23","false","false","Cluster 1","Clustered","11.085714285714285","0","ENSMUSG00000049807"
"206","","",,,"Slc25a35","false","false","Cluster 1","Clustered","10.588235294117647","0","ENSMUSG00000018740"
"205","","",,,"Sparc","false","false","Cluster 1","Clustered","11.604395604395604","0","ENSMUSG00000018593"
"76","ARCHS4 Coexpression,543;Enrichr Queries,79;GTEx Coexpression,14","PANK1,ACSM5,ABAT,SLC4A4,ICAM1,LGALS3,CHEK2,NAMPT,MYB,PLCE1,SOX9,MS4A10,XYLB,HABP2,GAMT,DAPK2,SERPINF2,ADGRA3,PRKCA,HOGA1,CMBL,PRAP1,ZC2HC1C,PPP1R3C,TFR2,SOAT2,LGALS12,ACOT2,SUCLG2,CYP2E1,UQCRC2,PLPP3,HPD,GPLD1,EPAS1,SLC22A1,MGST1,GUCD1,TTPA,RDH16,HMOX1,PPARGC1A,RREB1,PPARGC1B,DECR1,JUN,FN1,FZD9,NR1D1,A1CF,GADD45G,SULT1B1,ZBTB8B,ITM2C,BTG2,ACY1,MOGAT2,GPT,CLYBL,KHK,AIFM1,HNF4A,STBD1,TIMP3,ACADM,ACADS,CLUH,CNOT6L,MME,PGAM1,ELOVL6,PROX1,F2,PTGR2,RIPPLY3,BDH1,RILPL1,PXDN,DPYD,MGLL,KANK1,ECHS1,NR1I3,NR1I2,AFM,RXRA,MSX1,GSN,MDH2,GLYCTK,WWP1,FMO4,DHRS3,DHRS4,ALDH4A1,NUDT7,CFHR2,GPAM,TMEM56,PCDHB16,COQ8A,SLC28A1,OTC,ALDH1L1,ACAA2,EXOC3L4,IRS1,RORA,NR3C1,CELSR1,ETS1,CLU,MYLK3,TMEM143,FADS3,FADS2,SLC25A48,HADH,SLC25A45,FADS1,TGM2,ABCG5,DGAT2,IGFBP5,F2R,ACOT11,ACOT12,TTC7B,PIPOX,SDHC,SDHA,SDHB,GPD1,SLC27A5,PFKFB1,PFKFB3,INSIG1,ITPR1,PLD5,GPR85,LPL,FBXO48,CACNA1A,NDRG2,ACACB,NDRG1,NPAS2,ACAT1,NEUROD1,NEUROD2,SCUBE1,SRGAP1,WNT3,PRNP,TGFB2,OSBPL6,VDR,EPHX2,COQ9,COQ5,GRHPR,MLXIPL,CXCL10,CPS1,BHLHE40,NABP1,ACO2,DNAL1,TRIM72,THRB,THRA,SLC2A1,SLC2A2,HSPB1,ETFA,SLC2A4,TMEM220,TTC28,NADK2,ALDH2,ME2,SLC37A4,PLA2G12B,KLF15,TGFBR3,PTP4A3,EHHADH,IRF1,CAT,ALDH1A1,NDUFS2,ANG,SLC25A13,CEBPA,PRKAA2,ACSS2,BPHL,THBS1,AURKB,SELENBP1,ABLIM1,ERBB2,BPNT1,FAHD1,MMAB,MACC1,APOC3,SYT14,ARID3A,SUOX,TTC39C,EFR3B,SYT12,CHPT1","114","212.0","Ppara","false","false","Cluster 1","Clustered","11.050819672131148","4","ENSMUSG00000022383"
"1100","","",,,"Cdk5r1","false","false","Cluster 1","Clustered","11.100000000000001","0","ENSMUSG00000048895"
"844","","",,,"Kcnn4","false","false","Cluster 1","Clustered","11.38562091503268","0","ENSMUSG00000054342"
"588","","",,,"Zc3h12c","false","false","Cluster 1","Clustered","10.666666666666666","0","ENSMUSG00000035164"
"459","","",,,"Ablim2","false","false","Cluster 1","Clustered","10.676470588235293","0","ENSMUSG00000029095"
"74","Literature ChIP-seq,65;ARCHS4 Coexpression,811;ENCODE ChIP-seq,39;Enrichr Queries,642;ReMap ChIP-seq,155;GTEx Coexpression,655","MDC1,MT-ND5,SCT,GLDC,ABAT,ENO1,ABCA12,CLDN1,FAM122B,ZC3H12C,SAMD14,CREB3L3,LIPG,CYP1B1,IER3,GAMT,HES7,STARD4,DAPK1,SERPINF2,RNASE4,PRKCA,HOGA1,HDHD3,SYTL3,CLDN6,ZC2HC1C,GPR162,CLPS,WDR81,CLDN9,ACOT2,PLBD1,ACOT1,SERPING1,PRR11,TSPYL4,IL20RB,PLA2G3,CFP,DYNC2LI1,GUCD1,CRACR2A,CRACR2B,RDH12,HMOX1,RHBDL3,ST3GAL1,RREB1,ST3GAL2,S100A11,NKX2-2,NFE2,NGFR,JUN,GSTM2,GSDMA,CADM4,ABCA5,NFATC3,FN1,SLC16A12,ABCA7,NR1D1,A1CF,FOSL1,GJB4,LGMN,BTG2,LPCAT1,GPT,ADM,PYGL,RCSD1,SLC6A4,CASP14,TMEM189,FAM102A,IMPA2,ADAMTSL4,TMEM44,TIMP2,TCP11L2,TIMP3,HELLS,RMI2,CLUH,ANXA1,TPI1,ACTL6B,ROM1,ITPK1,TMC8,SERPINB5,FAM222A,BDH1,ANGPTL6,PXDN,PLEKHO2,PPARA,TKT,SMTNL2,PAFAH1B3,CRYAB,VAMP2,MGLL,PKN3,COL11A2,PTAFR,NR1I2,SNX32,FAM129B,FAM117A,RNF135,FGD3,GPR151,ALOX5,PLAGL1,CARNS1,FLNC,RNF130,GPR157,RUNX1T1,EGLN1,CDKN2D,EGLN3,AOC1,GSN,NR1H3,DHRS3,DHRS4,SULF2,CENPF,SNX16,CLCF1,LPCAT3,AGBL3,CENPM,FOSB,RIMBP3,COQ8A,YPEL3,TMEM229B,UOX,NRROS,ANKRD35,EXOC3L4,IRS1,RAB3D,CHRM4,NAB2,GUCA1A,RORA,FBXO21,TNF,CLU,EFEMP2,RIMS4,FCGRT,SESN1,SCMH1,NUDT19,SLC16A6,TNFRSF8,NEK2,SLC25A43,SLC25A45,SLC16A3,FADS1,MYLIP,TLE2,PCYT2,DGAT1,DIO1,IGFBP2,PIPOX,NEAT1,VMAC,NAAA,S100A6,ADAM8,IGFALS,SQSTM1,SLC27A5,KANK3,LY6E,PFKFB1,PFKFB3,ARL6,ARL3,ITPR1,FBXO48,NPAS2,GLIS2,NEUROD2,KLC3,SNN,NACC2,SRGAP1,SDF2L1,BTN2A2,FBXO32,CXCL10,GGCX,MDM2,NFE2L3,MAFK,PLEKHM3,TUBA8,ITGAM,ITGB5,ONECUT3,CDCA7L,LECT2,TSPAN12,BICD1,NKPD1,DUSP10,DDI2,ITGB7,CEP170,UPP1,TRPC1,ITGA2,APOA1,APOA4,VPS37B,DUSP22,PTP4A3,ESPL1,ITGA7,ANG,DSG3,GAPDH,DTL,CRP,CEBPA,FGL2,HSD17B13,SLC5A10,SEMA3F,CXXC5,AP3M2,MROH1,CECR2,SLC25A29,ABLIM1,SH3BP1,TRIM47,IGF2BP3,FYN,FSD1,RFFL,ALOXE3,SLC12A4,RNF24,CCDC58,AHNAK2,APOC3,FOXJ1,FBXL16,TTC39C,SORL1,EFR3B,CPPED1,NFASC,SYT12,MYO1A,TRIM35,TRIM38,NECTIN4,NECTIN3,SLC25A35,SPARC,FAM89B,AQP9,CBLB,CISD3,IKZF4,ICAM1,LGALS3,FRAT2,CHEK2,SPATA24,LONP1,SOX9,ATXN7L2,CCDC92,SKP2,TMEM88B,ENTPD8,KCNK16,ACSL3,MFSD11,GCAT,CYP27A1,PPP1R3C,SOAT2,SUCLG2,RIN3,MXRA7,KDELR3,PLPP3,STX1A,PLA1A,EPAS1,STXBP1,EIF5A2,LPAR3,PCBP4,TSPAN4,SARAF,FAM43A,SNX9,MAP9,RBM11,TRAP1,TMEM86A,PTPRN2,FAM78A,REG4,IFFO2,PYCR1,NBEAL2,CCDC88B,PM20D1,ACER1,TPX2,COL9A3,RGL3,ITM2C,COL18A1,PCSK1,NRP2,TMEM151B,ACY1,HNF4G,GRIK4,DOC2B,KHK,HERPUD1,SH3PXD2A,STBD1,RAC3,FFAR2,TMED6,PACRG,IZUMO4,TMEM150A,TNFRSF12A,PROX1,ZDHHC14,DEPDC7,ALDOC,ALDOA,TLR4,DBN1,MATN2,TMPRSS9,MAGEH1,CD63,AMER2,AKR1D1,PAPLN,CXCR4,ALOX12B,VWCE,CRIP1,TCEAL8,CST3,RPRML,REM2,EMC9,SLC31A2,PTGES2,SUSD2,LHFPL2,KRT18,TCEA3,TCEA2,CD68,FOXA3,SCARB1,PRDM9,ACAA2,NRM,SDR9C7,OTP,JADE2,NR3C1,CELSR1,ETS1,CELSR3,SYDE2,ARHGAP40,FAM162A,CAPN2,SBF2,PPFIA4,TGM2,ZBP1,G6PC,ADPRHL1,SPNS2,RUNDC3A,PDIA5,PLA2G15,GLTPD2,DOK3,SHPK,ODF3B,RTN2,AKNA,PLD5,ARHGAP18,NDRG2,PLD1,NDRG1,FBLN2,CCNB2,UAP1L1,H1FX,VARS2,TAC1,COX10,PACSIN1,PRNP,ACBD4,VDR,TGFB3,HMGA1,SYT7,COQ5,ARHGAP23,EFNA1,AHI1,BMP3,ATG16L2,DLG4,BAMBI,DNAJC10,BHLHE40,FGFR4,GALK1,PHF19,MXD4,ACADVL,THRA,SLC2A1,HSPB1,SLC2A2,LAMC2,DMKN,SLC2A6,PITPNC1,DBP,ALDH2,ADGRE5,NAPRT,HIST1H1C,KRT222,SUN2,EGFL7,CAMK1D,LMNTD2,TBC1D8,H2AFV,OLIG1,UPK3B,UPK3A,ETV5,TGFBR3,FGR,ACTA2,CCNA2,GFOD1,DDAH2,IRF1,CAT,ATP6V1B2,CDHR5,CDH16,LAMA5,HLF,RGS14,TUFT1,REP15,MSLNL,ATP1A1,THBS1,AURKB,AGPAT4,ASB16,SV2A,ATOH8,MXI1,STOM,HES1,BPNT1,CRYM,PDLIM4,ARID3A,MAPK15,MEIS2,SLC4A8,ASB1","360","394.5","Rxra","false","false","Cluster 1","Seed","13.139386189258312","3","ENSMUSG00000015846"
"200","ARCHS4 Coexpression,259;Enrichr Queries,23;ReMap ChIP-seq,101;GTEx Coexpression,728","MDC1,IFITM1,MT-ND5,SPARC,GLDC,ENO1,MKI67,SMC4,CLDN1,CISD3,LGALS3,SAMD14,GJA1,CHEK2,DPYSL3,MYB,CYP1B1,SOX9,CHAC1,IER3,HES7,TMEM88B,SLC6A19,SERPINF2,DHDH,RNASE4,TM4SF5,ACSL3,MFSD11,HSPG2,GCAT,CLDN6,NEIL3,POR,WDR81,SOAT2,CLDN9,KCTD14,MXRA7,KIF20B,PRR11,ABCB6,EPAS1,SMIM1,NCAPG,LDHA,CRACR2B,PCBP4,STC2,GRPEL2,HMOX1,KCNN4,TRAP1,JUN,PLK2,MCAM,SLC35E4,FZD7,PLK1,IGF2,FN1,FZD9,PYCR1,NR1D1,SMARCA1,NR0B2,FOSL1,TPX2,CYP2S1,KYAT1,COL9A3,ITM2C,COL18A1,TMEM151B,ACY1,SLC35F2,PHF1,PCSK9,GPT,ADM,KIF11,SLC7A11,PTPRH,CLYBL,KHK,JPH4,TMEM189,GYS1,SHH,TMED3,PBK,RAC3,TIMP3,TK1,NDC1,PSD,TEAD4,HELLS,RMI2,TPI1,TMEM150A,ANXA1,TNFRSF12A,PGAM1,TMC8,F2,SLC39A14,RENBP,MMP11,TMEM37,PLCB3,INF2,PXDN,ADSSL1,ALDOA,FJX1,VAMP2,GRAMD1A,SLC43A3,NR1I3,NDUFA4L2,SNX33,AFP,PTGS2,CENPA,CRIP1,FAM129B,SLC7A3,CST3,SLC17A9,CAMK2N1,FLNA,CKB,EMC9,SLC16A1,PKLR,PTGES2,NR1H3,DHRS3,AGT,SULF2,CENPF,KRT18,PCDHB16,TCEA2,FOSB,NCAPD2,ESYT1,YPEL3,FOXA3,HSPA1B,MAD2L1,SCARB1,ANKRD13D,EXOC3L4,CSF1,CHPF,HJURP,NRM,LOXL4,BUB1B,PLAT,CELSR1,ETS1,CLU,EFEMP2,TUBB6,SALL2,FCGRT,PLAU,NUSAP1,SLC25A43,SLC16A3,LZTS1,FADS1,SLC16A5,TGM2,PCYT2,SEMA6A,FST,IGFBP2,NEAT1,ERN1,PLA2G15,VMAC,ACAP3,GLTPD2,MELK,MYCN,COL4A2,COL4A1,MADD,S100A6,AJUBA,SLC27A5,RTN2,AK4,HMMR,PLD1,NDRG2,PLCXD1,NDRG1,ACAT2,SLC9A3R2,CCNB2,CCNB1,ADGRG1,PODXL,ALDH3B1,ADGRG6,PMVK,TNFRSF14,ANKZF1,PRNP,FDPS,TGFB2,ACBD4,GFPT2,HMGA1,TRPV2,HMGA2,SSC5D,EFNA1,CXCL10,GGCX,DLG4,BHLHE40,CDK1,SP5,MAFK,DHCR7,FGFR4,ARHGAP11A,ACADVL,SLC2A1,HSPB1,LAMC2,FOXM1,LMNB1,MFSD9,UPP1,SLC37A4,ABCD1,HIST1H1C,HS3ST3B1,CKAP2L,ITGA2,LMNTD2,PLAUR,APOA1,APOA4,ETV1,MASTL,REXO2,UPK3A,CKAP4,ETV5,NIPSNAP1,GIP,SSTR5,CCNA2,ARL4C,ASPM,CREB3,ALDH1A3,PTP4A3,DDAH2,BIRC5,NDUFS2,ANG,ITGA5,GAPDH,DTL,SLC25A13,CCDC189,LAMA5,HLF,LRP1,RGS16,LEF1,TTK,THBS1,AURKB,AURKA,HSPD1,SH3BP1,ERBB2,POLD2,TRIM47,IGF2BP3,HES1,IGF2BP2,ALOXE3,BUB1,LRRC8E,E2F8,MACC1,APOC3,ARID3A,SEMA4G,TICRR,FRAS1,SARDH,SNTB1","200","277.8","Etv4","false","false","Cluster 1","Clustered","10.576923076923077","0","ENSMUSG00000017724"
"583","","",,,"Gna11","false","false","Cluster 1","Clustered","10.94736842105263","0","ENSMUSG00000034781"
"454","","",,,"Map7d1","false","false","Cluster 1","Clustered","11.01578947368421","0","ENSMUSG00000028849"
"704","","",,,"Tmco4","false","false","Cluster 1","Clustered","10.7953216374269","0","ENSMUSG00000041143"
"318","","",,,"Sgol1","false","false","Cluster 1","Clustered","11.085714285714285","0","ENSMUSG00000023940"
"1212","","",,,"Fads1","false","false","Cluster 1","Clustered","11.099415204678362","0","ENSMUSG00000010663"
"700","","",,,"Fzd7","false","false","Cluster 1","Clustered","10.878947368421054","0","ENSMUSG00000041075"
"826","","",,,"Acot4","false","false","Cluster 1","Clustered","10.7953216374269","0","ENSMUSG00000052392"
"314","","",,,"Rps6ka2","false","false","Cluster 1","Clustered","11.604395604395604","0","ENSMUSG00000023809"
"177","","",,,"Mertk","false","false","Cluster 1","Clustered","10.742105263157894","0","ENSMUSG00000014361"
"303","","",,,"Tuba1b","false","false","Cluster 1","Clustered","10.588235294117647","0","ENSMUSG00000023004"
"2730","","",,,"C230035I16Rik","false","false","Cluster 1","Clustered","10.588235294117647","0","ENSMUSG00000085024"
"170","","",,,"Pgam1","false","false","Cluster 1","Clustered","10.956521739130435","0","ENSMUSG00000011752"
"1321","","",,,"Acot2","false","false","Cluster 1","Clustered","10.717948717948717","0","ENSMUSG00000021226"
"1957","","",,,"Zfp292","false","false","Cluster 1","Clustered","10.709523809523809","0","ENSMUSG00000039967"
"805","","",,,"Arl4c","false","false","Cluster 1","Clustered","10.742105263157894","0","ENSMUSG00000049866"
"1956","","",,,"Dag1","false","false","Cluster 1","Clustered","10.588235294117647","0","ENSMUSG00000039952"
"676","","",,,"Tbc1d2","false","false","Cluster 1","Clustered","10.764705882352942","0","ENSMUSG00000039813"
"2077","","",,,"Ckap4","false","false","Cluster 2","Clustered","8.454545454545455","0","ENSMUSG00000046841"
"1051","","",,,"Rbm20","false","false","Cluster 2","Clustered","10.266666666666667","0","ENSMUSG00000043639"
"2075","","",,,"Tifa","false","false","Cluster 2","Clustered","9.808333333333334","0","ENSMUSG00000046688"
"1050","","",,,"Gng2","false","false","Cluster 2","Clustered","9.202614379084968","0","ENSMUSG00000043004"
"1049","","",,,"Acad12","false","false","Cluster 2","Clustered","8.812865497076023","0","ENSMUSG00000042647"
"1048","","",,,"Gsap","false","false","Cluster 2","Clustered","9.847619047619048","0","ENSMUSG00000039934"
"2070","","",,,"Camk2n1","false","false","Cluster 2","Clustered","9.847619047619048","0","ENSMUSG00000046447"
"2067","","",,,"Ankle1","false","false","Cluster 2","Clustered","9.545454545454547","0","ENSMUSG00000046295"
"1041","","",,,"Trim67","false","false","Cluster 2","Clustered","8.50909090909091","0","ENSMUSG00000036913"
"1036","","",,,"Fam214a","false","false","Cluster 2","Clustered","9.402597402597403","0","ENSMUSG00000034858"
"2060","","",,,"Smtnl2","false","false","Cluster 2","Clustered","8.857142857142858","0","ENSMUSG00000045667"
"1034","","",,,"Pla2g3","false","false","Cluster 2","Clustered","9.301470588235293","0","ENSMUSG00000034579"
"2053","","",,,"Tubg2","false","false","Cluster 2","Clustered","8.50909090909091","0","ENSMUSG00000045007"
"1029","","",,,"Tmem38a","false","false","Cluster 2","Clustered","9.696969696969697","0","ENSMUSG00000031791"
"2047","","",,,"Rin3","false","false","Cluster 2","Clustered","9.463235294117649","0","ENSMUSG00000044456"
"1022","","",,,"Kif5c","false","false","Cluster 2","Clustered","9.35897435897436","0","ENSMUSG00000026764"
"1016","","",,,"Xpnpep1","false","false","Cluster 2","Clustered","8.571428571428571","0","ENSMUSG00000025027"
"1015","","",,,"Rsph1","false","false","Cluster 2","Clustered","9.716666666666667","0","ENSMUSG00000024033"
"1014","","",,,"Serping1","false","false","Cluster 2","Clustered","9.487179487179487","0","ENSMUSG00000023224"
"1013","","",,,"Sdf2l1","false","false","Cluster 2","Clustered","8.590909090909092","0","ENSMUSG00000022769"
"2035","","",,,"Ccrl2","false","false","Cluster 2","Clustered","8.672727272727272","0","ENSMUSG00000043953"
"1006","","",,,"Lrp11","false","false","Cluster 2","Clustered","9.625","0","ENSMUSG00000019796"
"2029","","",,,"2510009E07Rik","false","false","Cluster 2","Clustered","8.416666666666666","0","ENSMUSG00000043391"
"1004","","",,,"Cd40","false","false","Cluster 2","Clustered","8.857142857142858","0","ENSMUSG00000017652"
"1003","","",,,"Klhl3","false","false","Cluster 2","Clustered","9.12087912087912","0","ENSMUSG00000014164"
"1001","","",,,"Pdk1","false","false","Cluster 2","Clustered","9.130718954248367","0","ENSMUSG00000006494"
"996","","",,,"Cacna1b","false","false","Cluster 2","Clustered","8.454545454545455","0","ENSMUSG00000004113"
"2020","","",,,"Aqp11","false","false","Cluster 2","Clustered","10.352941176470589","0","ENSMUSG00000042797"
"993","","",,,"Abcg1","false","false","Cluster 2","Clustered","8.50909090909091","0","ENSMUSG00000024030"
"991","ARCHS4 Coexpression,42;Enrichr Queries,14;GTEx Coexpression,37","SPARC,PANK1,ACSM5,ABAT,SLC4A4,ICAM1,LGALS3,CREB3L3,CHEK2,SOX9,XYLB,HABP2,SERPINF2,RNASE4,TM4SF5,TM4SF4,CMBL,PRAP1,CYP27A1,RBP4,POR,PPP1R3C,TFR2,SOAT2,LGALS12,SERPING1,CYP2E1,PLPP3,HPD,ACOT4,RETSAT,MAOB,EPAS1,SHMT1,CFI,SLC22A1,MTTP,MGST1,SLC30A10,ADH4,AGMO,TTPA,RDH16,HMOX1,PPARGC1A,MYH7B,JUN,FN1,FZD9,CIDEB,NR1D1,A1CF,CIDEC,GADD45G,GJB1,ITM2C,CDKN1C,COL18A1,BTG2,MOGAT2,GPT,ADM,PYGL,KHK,HNF4A,MME,ELOVL6,PROX1,F2,SLC39A14,GCHFR,TMEM37,DEPDC7,SLC7A8,BDH1,OAF,PXDN,ADSSL1,RGN,ALDOC,MAPT,ALDOB,PPARA,GAS6,MGLL,ECHS1,NR1I3,HAAO,NR1I2,AKR1D1,AFM,HSD17B6,AFP,PAPSS2,SLC17A9,ASPDH,CKB,GSN,PKLR,F10,GLYCTK,FMO1,FMO4,FMO5,DHRS3,AGT,FABP1,ALDH4A1,KRT18,CFHR2,GPAM,AADAC,TMEM56,TCEA3,PCDHB16,GSTA1,FOSB,COQ8A,SLC28A1,FOXA3,OTC,KLB,STEAP3,ALDH1L1,ACAA2,EXOC3L4,GOLT1A,OGDHL,CELSR1,CLU,DEPTOR,GRB14,HADH,FADS1,TGM2,ABCG5,TLE2,G6PC,DGAT2,IGFBP5,IGFBP2,DIO1,ACOT12,PIPOX,GLTPD2,COL4A1,GPD1,SELENOP,IGFALS,NUPR1,SLC27A2,SLC27A5,PFKFB1,PFKFB3,INSIG1,PROZ,GMPR,CACNA1A,LPL,NDRG2,ACACB,NDRG1,RAP1GAP,NPC1L1,PRNP,EPHX2,INHBC,SYT7,GRHPR,CXCL10,DAO,CPS1,BHLHE40,REEP6,FGFR4,THRB,LEAP2,LECT2,SLC2A2,HSPB1,SLC2A4,TMEM220,NADK2,ALDH2,MCF2L,PLA2G12B,ABCC8,APOA1,KLF15,PRODH2,ACTA2,TGFBR3,PTP4A3,EHHADH,CAT,ALDH1A1,ASPG,ANG,FBP1,SLC25A13,CAMK2B,CEBPA,SLC47A1,ACSS2,HLF,HSD17B13,BPHL,AURKB,SELENBP1,RASD1,APOC3,SEMA4G,SORL1,SARDH,NAGS","8","31.0","Mlxipl","false","false","Cluster 2","Clustered","9.952380952380953","0","ENSMUSG00000005373"
"985","","",,,"Gm32742","false","false","Cluster 2","Clustered","8.5","0","ENSMUSG00000110266"
"984","","",,,"Gm45623","false","false","Cluster 2","Clustered","9.716666666666667","0","ENSMUSG00000110086"
"983","","",,,"Gm42372","false","false","Cluster 2","Clustered","8.952380952380953","0","ENSMUSG00000108348"
"2006","","",,,"Slc35f2","false","false","Cluster 2","Clustered","8.836363636363636","0","ENSMUSG00000042195"
"2005","","",,,"Pnliprp1","false","false","Cluster 2","Clustered","9.545454545454547","0","ENSMUSG00000042179"
"977","","",,,"Cdkn2d","false","false","Cluster 2","Clustered","9.12087912087912","0","ENSMUSG00000096472"
"976","","",,,"Edaradd","false","false","Cluster 2","Clustered","9.12087912087912","0","ENSMUSG00000095105"
"974","","",,,"1700122O11Rik","false","false","Cluster 2","Clustered","8.901098901098901","0","ENSMUSG00000094928"
"972","","",,,"Gm21885","false","false","Cluster 2","Clustered","8.626315789473685","0","ENSMUSG00000094091"
"971","","",,,"Gcnt4","false","false","Cluster 2","Clustered","9.696969696969697","0","ENSMUSG00000091387"
"967","","",,,"Gm12216","false","false","Cluster 2","Clustered","9.230769230769232","0","ENSMUSG00000081769"
"1987","","",,,"Pla2g2d","false","false","Cluster 2","Clustered","9.0","0","ENSMUSG00000041202"
"962","","",,,"Arhgap8","false","false","Cluster 2","Clustered","10.274725274725276","0","ENSMUSG00000078954"
"959","","",,,"G6pc","false","false","Cluster 2","Clustered","8.510526315789473","0","ENSMUSG00000078650"
"1982","","",,,"Npnt","false","false","Cluster 2","Clustered","8.50909090909091","0","ENSMUSG00000040998"
"952","","",,,"Spc24","false","false","Cluster 2","Clustered","9.27450980392157","0","ENSMUSG00000074476"
"1975","","",,,"Erc2","false","false","Cluster 2","Clustered","8.454545454545455","0","ENSMUSG00000040640"
"951","","",,,"Zfp94","false","false","Cluster 2","Clustered","8.666666666666668","0","ENSMUSG00000074282"
"950","","",,,"Gsta1","false","false","Cluster 2","Clustered","9.102564102564102","0","ENSMUSG00000074183"
"1973","","",,,"Bace2","false","false","Cluster 2","Clustered","8.454545454545455","0","ENSMUSG00000040605"
"946","","",,,"Acot1","false","false","Cluster 2","Clustered","9.625","0","ENSMUSG00000072949"
"945","","",,,"Ptgr2","false","false","Cluster 2","Clustered","9.894736842105264","0","ENSMUSG00000072946"
"1968","","",,,"Arhgap9","false","false","Cluster 2","Clustered","9.0","0","ENSMUSG00000040345"
"941","","",,,"Ang","false","false","Cluster 2","Clustered","9.44","0","ENSMUSG00000072115"
"940","","",,,"Apcdd1","false","false","Cluster 2","Clustered","8.50909090909091","0","ENSMUSG00000071847"
"938","","",,,"Klrg2","false","false","Cluster 2","Clustered","9.848484848484848","0","ENSMUSG00000071537"
"1961","","",,,"Sdr9c7","false","false","Cluster 2","Clustered","8.761904761904763","0","ENSMUSG00000040127"
"936","","",,,"Cecr2","false","false","Cluster 2","Clustered","8.5","0","ENSMUSG00000071226"
"934","","",,,"Ceacam20","false","false","Cluster 2","Clustered","8.901098901098901","0","ENSMUSG00000070777"
"932","","",,,"Htr1d","false","false","Cluster 2","Clustered","8.454545454545455","0","ENSMUSG00000070687"
"1955","","",,,"Plcb4","false","false","Cluster 2","Clustered","9.230769230769232","0","ENSMUSG00000039943"
"931","","",,,"Hs3st3b1","false","false","Cluster 2","Clustered","9.625","0","ENSMUSG00000070407"
"928","","",,,"Dusp22","false","false","Cluster 2","Clustered","10.266666666666667","0","ENSMUSG00000069255"
"927","","",,,"Adgrv1","false","false","Cluster 2","Clustered","9.139705882352942","0","ENSMUSG00000069170"
"1951","","",,,"Kyat1","false","false","Cluster 2","Clustered","9.533333333333333","0","ENSMUSG00000039648"
"926","ARCHS4 Coexpression,1399;Enrichr Queries,876;GTEx Coexpression,636","FOXA1,CD83,PANK3,DIXDC1,CBLB,RORA,FRY,NR3C1,CELSR1,ETS1,RGS5,ZC3H12C,DACH1,GJA4,SCMH1,NAMPT,LONP1,COTL1,IER3,MYLIP,EPHA4,MAP1B,JTB,TNIK,ATP6V0D1,PLPP3,TRABD2B,RASL12,MACF1,PFKFB3,RNF180,INSIG1,NDRG1,ACACA,GLIS2,IGFBP7,CYC1,ST3GAL1,RREB1,S100A11,PRNP,JUN,RBPMS,ATP8B2,TIPARP,MCAM,PLK2,FN1,CRIM1,FZD9,RAB27B,NBEAL2,FBXO32,GADD45G,CXCL10,NR4A3,LPAR5,BHLHE40,ID4,MAFK,AMOTL2,FERMT2,PCDHB7,ITM2C,COL18A1,BTG2,SLC7A11,SYNE2,TTC28,CASP12,CSRP2,DUSP10,SGCB,TIMP3,ARFGEF3,DACT1,KLF12,TRPC1,ANO6,ACTA2,ENAH,ARL4C,TGFBR3,PTP4A3,SETBP1,IRF1,PLSCR4,PXDN,CDC42EP3,PDE5A,RBMS3,TAGLN,KDM3A,AMIGO2,FAM129A,CXCR4,ZDHHC21,PTGS2,THBS1,CLN6,AURKB,SH3BP1,MXI1,FLNA,RUNX1T1,SLC12A4,EGLN3,PTPN13,SGPP2,SORL1,MAPK13,KLF7,MSRB3,FOSB,FRYL","1113","970.3","Zbtb10","false","false","Cluster 2","Clustered","9.35","0","ENSMUSG00000069114"
"925","","",,,"Cry2","false","false","Cluster 2","Clustered","9.059288537549406","0","ENSMUSG00000068742"
"1948","","",,,"Mocos","false","false","Cluster 2","Clustered","8.952380952380953","0","ENSMUSG00000039616"
"1941","","",,,"Igfbp2","false","false","Cluster 2","Clustered","8.416666666666666","0","ENSMUSG00000039323"
"1939","","",,,"Stx11","false","false","Cluster 2","Clustered","8.836363636363636","0","ENSMUSG00000039232"
"913","","",,,"Gimap8","false","false","Cluster 2","Clustered","9.12087912087912","0","ENSMUSG00000064262"
"1934","ARCHS4 Coexpression,414;Enrichr Queries,501;GTEx Coexpression,705","SAMD9L,NRROS,CD83,ANKRD13D,GFI1,JADE2,CELSR1,ETS1,IFIT3,GIMAP8,ICAM1,ZC3H12D,RINL,FRAT2,BASP1,RASSF5,COTL1,EPSTI1,LONP1,PIP4K2A,PLXNC1,KIF21B,ZBP1,PPP1R16B,ARID5A,CYBB,SYTL3,DOK3,MFNG,RIN3,ADAM8,CARD11,LY6E,HVCN1,CFP,NDRG1,ADGRG1,HMOX1,TNFRSF14,ST3GAL1,JUN,CARMIL2,FAM78A,NFATC2,MSN,NBEAL2,ABCA7,ISG20,CCDC88B,SEPSECS,PTPRE,CXCL10,PTPRC,ATG16L2,BHLHE40,ITM2C,ARHGAP9,DENND1C,BTG2,ITGAM,SH3KBP1,CELF2,PLEK,ATP2A3,PTPN22,SLC7A11,ITGAL,RCSD1,LIMD2,HERPUD1,PSTPIP1,ADGRE5,CASP1,ITGB7,FFAR2,EMB,CD53,SUN2,ANXA1,SH2D3C,PLAUR,TMC8,TMEM173,VAV1,PARP8,APBB1IP,ARL4C,FGR,HSH2D,PTP4A3,RASA3,LCK,IRF1,PXDN,EVL,TLR6,RGS14,CCDC69,PTAFR,FAM129A,CXCR4,NLRC3,CAPG,THBS1,AURKB,FGD2,FGD3,SH3BP1,ALOX5,UCP2,FLNA,FYN,IL12RB1,SORL1,CPPED1,STK17B,KLHL7,CD68,CD244,YPEL3","574","540.0","Akna","false","false","Cluster 2","Clustered","8.761904761904763","0","ENSMUSG00000039158"
"910","","",,,"Ifi27","false","false","Cluster 2","Clustered","9.371428571428572","0","ENSMUSG00000064215"
"909","","",,,"4430402I18Rik","false","false","Cluster 2","Clustered","9.696969696969697","0","ENSMUSG00000064202"
"908","","",,,"Vrk2","false","false","Cluster 2","Clustered","9.010989010989011","0","ENSMUSG00000064090"
"1931","","",,,"Nrn1","false","false","Cluster 2","Clustered","9.230769230769232","0","ENSMUSG00000039114"
"903","","",,,"Ldha","false","false","Cluster 2","Clustered","10.129870129870131","0","ENSMUSG00000063229"
"1927","","",,,"Ccdc68","false","false","Cluster 2","Clustered","9.230769230769232","0","ENSMUSG00000038903"
"1926","","",,,"Agbl3","false","false","Cluster 2","Clustered","9.35897435897436","0","ENSMUSG00000038836"
"899","","",,,"Cks2","false","false","Cluster 2","Clustered","10.431372549019608","0","ENSMUSG00000062248"
"898","","",,,"Qk","false","false","Cluster 2","Clustered","9.91578947368421","0","ENSMUSG00000062078"
"1922","","",,,"Nlrp6","false","false","Cluster 2","Clustered","9.35897435897436","0","ENSMUSG00000038745"
"897","","",,,"Pgk1","false","false","Cluster 2","Clustered","10.196078431372548","0","ENSMUSG00000062070"
"896","","",,,"Mdc1","false","false","Cluster 2","Clustered","9.010989010989011","0","ENSMUSG00000061607"
"895","","",,,"Ksr2","false","false","Cluster 2","Clustered","9.545454545454547","0","ENSMUSG00000061578"
"894","","",,,"Tmem236","false","false","Cluster 2","Clustered","10.395604395604396","0","ENSMUSG00000061531"
"892","","",,,"Dmkn","false","false","Cluster 2","Clustered","8.761904761904763","0","ENSMUSG00000060962"
"1912","","",,,"Sv2a","false","false","Cluster 2","Clustered","9.0","0","ENSMUSG00000038486"
"1911","","",,,"Olfml2b","false","false","Cluster 2","Clustered","9.545454545454547","0","ENSMUSG00000038463"
"887","","",,,"Kif27","false","false","Cluster 2","Clustered","9.0","0","ENSMUSG00000060176"
"1910","","",,,"Hdhd3","false","false","Cluster 2","Clustered","8.672727272727272","0","ENSMUSG00000038422"
"884","ARCHS4 Coexpression,985;Enrichr Queries,151;GTEx Coexpression,101","SPARC,STMN3,CELSR1,CLU,IFIT3,ICAM1,RIMS2,ARHGAP44,MFSD13A,LGALS3,SLC25A48,SAMD14,SALL2,FCGRT,SESN1,CHEK2,HIST3H2BA,SLC25A45,MS4A10,FADS1,RGS7,TGM2,IER3,GAMT,HES7,GABARAPL1,DGAT2,IGFBP5,DAPK2,IGFBP2,KCTD1,RNASE4,MAPK8IP2,CPT1C,RUNDC3A,ACAP3,PPP1R3C,SOAT2,SELENOP,S100A6,TRIM13,ODF3B,NUPR1,PLPP3,LY6E,NDRG4,BEX2,PFKFB3,EPAS1,NXPH4,INSIG1,CACNA1B,ABHD8,ITPR1,GPR85,CACNA1A,LPL,NREP,NDRG2,NDRG1,TTBK1,RAP1GAP,PDZD4,LDHA,SCUBE1,HRH3,TSPAN4,HMOX1,WNT3,ST3GAL2,SPTBN2,ASIC1,PRNP,TMEM120B,SYT3,JUN,CARMIL3,EPHX2,ST8SIA3,HPS4,NR1D1,FBXO32,GADD45G,GNAO1,EFNA1,CXCL10,EFNA3,GGCX,DLG4,REEP2,BHLHE40,ZBTB8B,PRR36,SCN2B,ITM2C,MAP3K12,TRIM72,WDR47,BTG2,PODXL2,THRA,TCF23,SLC2A1,HSPB1,ADM,HERPUD1,UNC80,JPH4,SHF,PCLO,ALDH2,GDAP1L1,TIMP2,TIMP3,RNF150,HIST1H1C,KRT222,PIANP,CAMK1D,ACTL6B,PLEKHG5,ANO8,AP3B2,KLF15,DNM1,ACTA2,FAM234B,PTP4A3,RILPL1,IRF1,CRY2,PXDN,COL6A1,ALDH1A1,ARHGEF4,ALDOC,MAPT,GAS6,SPACA6,PAFAH1B3,CRYAB,VAMP2,MGLL,CAMK2B,CD63,CEBPA,TAGLN,PHLPP1,RGS16,MSLNL,SEZ6,CRMP1,ZDHHC24,PHYHIP,THBS1,FAM117B,FSTL4,AURKB,SELENBP1,CST3,SV2A,CAMK2N1,SPOCK2,GPC1,MXI1,UCP2,BPNT1,CKB,PURG,GSN,BNIP3,LHFPL4,FMO4,EFR3B,SORL1,DHRS3,GRIN1,PSMB9,SPSB2,COL3A1,HIST3H2A,PIK3IP1,FAM131A,TCEA3,PCDHB16,FOSB,COQ8A,YPEL3,TMEM229B","383","412.3","Dbp","false","false","Cluster 2","Clustered","9.716666666666667","0","ENSMUSG00000059824"
"1908","","",,,"Sbf2","false","false","Cluster 2","Clustered","9.005847953216374","0","ENSMUSG00000038371"
"882","","",,,"Tcea2","false","false","Cluster 2","Clustered","8.748538011695906","0","ENSMUSG00000059540"
"881","","",,,"Nhs","false","false","Cluster 2","Clustered","8.836363636363636","0","ENSMUSG00000059493"
"1903","","",,,"Ptpdc1","false","false","Cluster 2","Clustered","8.791208791208792","0","ENSMUSG00000038042"
"876","","",,,"Tubb2a","false","false","Cluster 2","Clustered","8.5","0","ENSMUSG00000058672"
"873","","",,,"Adamts17","false","false","Cluster 2","Clustered","10.196078431372548","0","ENSMUSG00000058145"
"1895","","",,,"Adh4","false","false","Cluster 2","Clustered","9.010989010989011","0","ENSMUSG00000037797"
"868","","",,,"Fxyd3","false","false","Cluster 2","Clustered","9.533333333333333","0","ENSMUSG00000057092"
"865","","",,,"Capg","false","false","Cluster 2","Clustered","9.202614379084968","0","ENSMUSG00000056737"
"862","","",,,"Ptafr","false","false","Cluster 2","Clustered","8.454545454545455","0","ENSMUSG00000056529"
"1886","","",,,"Jade3","false","false","Cluster 2","Clustered","10.057142857142857","0","ENSMUSG00000037315"
"860","","",,,"Fam105a","false","false","Cluster 2","Clustered","8.583333333333332","0","ENSMUSG00000056069"
"1881","","",,,"Tmem71","false","false","Cluster 2","Clustered","8.454545454545455","0","ENSMUSG00000036944"
"1877","","",,,"Acaa2","false","false","Cluster 2","Clustered","8.761904761904763","0","ENSMUSG00000036880"
"852","","",,,"Zfp647","false","false","Cluster 2","Clustered","8.915032679738562","0","ENSMUSG00000054967"
"1875","","",,,"Entpd8","false","false","Cluster 2","Clustered","9.010989010989011","0","ENSMUSG00000036813"
"851","","",,,"Zfp667","false","false","Cluster 2","Clustered","10.161904761904763","0","ENSMUSG00000054893"
"850","","",,,"Rnd1","false","false","Cluster 2","Clustered","9.27450980392157","0","ENSMUSG00000054855"
"1871","","",,,"Card11","false","false","Cluster 2","Clustered","8.672727272727272","0","ENSMUSG00000036526"
"845","","",,,"Thnsl2","false","false","Cluster 2","Clustered","9.625","0","ENSMUSG00000054474"
"1868","","",,,"Npy1r","false","false","Cluster 2","Clustered","8.672727272727272","0","ENSMUSG00000036437"
"843","","",,,"Syne3","false","false","Cluster 2","Clustered","9.75","0","ENSMUSG00000054150"
"1867","","",,,"Rmdn2","false","false","Cluster 2","Clustered","8.791208791208792","0","ENSMUSG00000036368"
"842","","",,,"Lipg","false","false","Cluster 2","Clustered","10.274725274725276","0","ENSMUSG00000053846"
"839","","",,,"Oas1f","false","false","Cluster 2","Clustered","8.454545454545455","0","ENSMUSG00000053765"
"837","","",,,"Tanc2","false","false","Cluster 2","Clustered","9.393939393939394","0","ENSMUSG00000053580"
"836","","",,,"Kdm3a","false","false","Cluster 2","Clustered","10.354978354978355","0","ENSMUSG00000053470"
"1860","","",,,"Leap2","false","false","Cluster 2","Clustered","8.50909090909091","0","ENSMUSG00000036216"
"835","","",,,"Ggcx","false","false","Cluster 2","Clustered","9.625","0","ENSMUSG00000053460"
"834","","",,,"Ficd","false","false","Cluster 2","Clustered","8.583333333333332","0","ENSMUSG00000053334"
"1857","","",,,"Slc9a3","false","false","Cluster 2","Clustered","8.836363636363636","0","ENSMUSG00000036123"
"831","","",,,"2700081O15Rik","false","false","Cluster 2","Clustered","9.35897435897436","0","ENSMUSG00000053080"
"827","","",,,"Cpne8","false","false","Cluster 2","Clustered","8.50909090909091","0","ENSMUSG00000052560"
"824","","",,,"Mtcl1","false","false","Cluster 2","Clustered","10.153846153846155","0","ENSMUSG00000052105"
"1845","","",,,"Dok3","false","false","Cluster 2","Clustered","9.0","0","ENSMUSG00000035711"
"820","","",,,"Kctd14","false","false","Cluster 2","Clustered","8.454545454545455","0","ENSMUSG00000051727"
"1842","","",,,"Aldh1b1","false","false","Cluster 2","Clustered","9.382352941176471","0","ENSMUSG00000035561"
"818","","",,,"Rab11fip5","false","false","Cluster 2","Clustered","10.035087719298247","0","ENSMUSG00000051343"
"815","","",,,"Tmem37","false","false","Cluster 2","Clustered","10.057142857142857","0","ENSMUSG00000050777"
"814","","",,,"Ptges","false","false","Cluster 2","Clustered","9.952380952380953","0","ENSMUSG00000050737"
"813","","",,,"Plekho2","false","false","Cluster 2","Clustered","8.666666666666668","0","ENSMUSG00000050721"
"1835","","",,,"Neu3","false","false","Cluster 2","Clustered","8.50909090909091","0","ENSMUSG00000035239"
"807","","",,,"Zfp697","false","false","Cluster 2","Clustered","9.625","0","ENSMUSG00000050064"
"806","ARCHS4 Coexpression,1182;Enrichr Queries,1240;GTEx Coexpression,1257","BTG2,PANK3,GBE1,PLEK,SLC2A1,TESK2,RORA,ADM,ENO1,NR3C1,CELSR1,SMC4,HK2,DUSP10,NAMPT,LONP1,CEP170,PDK1,MFSD2A,BNIP3L,CNOT6L,TNFRSF18,CSGALNACT2,IPMK,PLAUR,ARID5A,GPCPD1,SYTL3,ARL4C,PIGA,PXDN,MACF1,KDM3A,PFKFB3,ECHS1,INSIG1,CXCR4,ADD3,PTGS2,THBS1,NDRG1,AURKB,SLC9A3R2,LDHA,CYB5R3,MXI1,HMOX1,FYN,CHML,EGLN1,CDK17,PRNP,JUN,MGAM,TIPARP,BNIP3,EIF2AK3,ZBTB10,BMP8B,SLC4A7,RIT1,P4HA1,STK17B,BHLHE40,DMXL2,TRIM36,PFKP,FRYL","1429","1226.0","Rlf","false","false","Cluster 2","Clustered","9.894736842105264","0","ENSMUSG00000049878"
"1827","","",,,"Asb16","false","false","Cluster 2","Clustered","9.533333333333333","0","ENSMUSG00000034768"
"802","","",,,"Ccdc69","false","false","Cluster 2","Clustered","9.35897435897436","0","ENSMUSG00000049588"
"801","","",,,"Tsku","false","false","Cluster 2","Clustered","8.87719298245614","0","ENSMUSG00000049580"
"1825","","",,,"Fras1","false","false","Cluster 2","Clustered","9.487179487179487","0","ENSMUSG00000034687"
"796","ARCHS4 Coexpression,102;GTEx Coexpression,31","RAB3C,CNTFR,STMN3,ABAT,CELSR3,MFSD13A,SAMD14,SALL2,FGF9,CDH2,KIF5C,DPYSL5,BASP1,DPYSL3,KIF21A,RGS7,EPHA4,UNC5A,RBFOX3,TMEM178B,TMOD2,MAGI2,MAPK8IP2,CPT1C,MYT1,RUNDC3A,CLIP3,DISP2,ACAP3,GPR162,OLFM1,ZC2HC1A,MAP1B,TSPYL4,PFN2,BEX4,BRSK2,NDRG4,STXBP1,ARL3,CACNA1B,NREP,CPLX2,TTBK1,PHF21B,IGSF21,NEUROD2,PDZD4,MAP2,MAP6,B4GALNT1,KIF3C,SCN3A,RAB6B,ASIC1,SYT3,TCAF1,FZD3,TMEM132A,MYO5A,RAB39B,DCLK2,KLHL23,CORO2B,DNAJC18,GNAO1,REEP1,CCDC88A,NBEA,DLG4,PKIA,REEP2,XKR4,PRR36,SCN2B,SNAP25,WDR47,TMEM151B,KCNC1,PODXL2,TENM4,RASGRF1,DIRAS2,ROBO1,UNC80,JPH4,PCLO,TUBA1A,SCRN1,GDAP1L1,DNER,CEP170,ERC2,TRIM67,KRT222,PIANP,ACTL6B,SGIP1,PAX6,AP3B2,DNM1,TUBB2A,ALDOC,MAPT,VAMP2,CAMK2B,KCNA1,FAXC,ATL1,SEZ6,CRMP1,PHYHIP,AGPAT4,GNG2,SV2A,SPOCK2,GPC2,FSD1,APBB1,PAK3,WASF1,GABRD,RUNX1T1,RIC3,MARCKSL1,NAP1L3,LHFPL4,NMNAT2,EFR3B,TUBB4A,GRIN1,STXBP5L,MAB21L3,NFASC,ABI2,MORN4,SYT11,KLHL7,NOVA2,TCEA2,TRIM36,CDK5R1","21","66.5","Purg","false","false","Cluster 2","Clustered","9.0","0","ENSMUSG00000049184"
"790","","",,,"Fam212b","false","false","Cluster 2","Clustered","9.545454545454547","0","ENSMUSG00000048458"
"788","","",,,"Cyp4f16","false","false","Cluster 2","Clustered","9.230769230769232","0","ENSMUSG00000048440"
"787","","",,,"F2r","false","false","Cluster 2","Clustered","10.431372549019608","0","ENSMUSG00000048376"
"1811","","",,,"Gde1","false","false","Cluster 2","Clustered","9.230769230769232","0","ENSMUSG00000033917"
"785","","",,,"Nags","false","false","Cluster 2","Clustered","9.301470588235293","0","ENSMUSG00000048217"
"784","","",,,"Ldlrad3","false","false","Cluster 2","Clustered","9.852631578947369","0","ENSMUSG00000048058"
"783","","",,,"Kcna1","false","false","Cluster 2","Clustered","8.672727272727272","0","ENSMUSG00000047976"
"781","ARCHS4 Coexpression,854;Enrichr Queries,78;GTEx Coexpression,547","SPARC,RORA,NR3C1,CELSR1,ETS1,SLC4A4,CLU,MYLK3,ELK3,MYLK,EFEMP1,CDH2,OPHN1,DPYSL3,CYP1B1,THSD7A,PLXNC1,SOX9,EPHA4,POSTN,IGFBP5,LIMCH1,IL1R1,CACNA2D1,SEMA6D,ACOT11,MAGI2,STARD9,TTC7B,RNASE4,PRKCA,PDGFRL,FAM227A,DISP2,RBP7,PROCR,TMEM135,COL4A2,COL4A1,MAP1B,LGALS12,SELENOP,SERPING1,KCTD12,PLPP3,SLC27A5,PARM1,EPAS1,CACNA1A,NREP,ACACB,CALHM2,PRKAR2B,CALD1,TSPAN4,SLC19A3,SNX9,IGFBP7,RAI2,JUN,CRTAP,TGFB2,LRRN3,FZD4,GFPT2,IGF2,FN1,HMGA1,INHBB,FBXO32,BMP6,ARHGAP24,SDK1,CXCL10,SULT1B1,COL1A2,NBEA,LYPD6B,BHLHE40,CPE,PYROXD2,FAT4,XKR4,ZBTB8B,ITM2C,CDKN1C,ABCD4,COL18A1,TENM4,CELF2,TCF23,PTPRM,PEAR1,PCSK5,TTC28,SYNE1,ROBO1,LMNB1,BOC,TIMP3,PLEKHG1,ANXA1,ARHGEF15,MME,PGAM1,PROX1,ADRA2A,TGFBR3,ARL4C,ACTA2,ALDH1A3,PTP4A3,PKM,SETBP1,RILPL1,PLSCR4,PXDN,KIT,COL6A1,ALDH1A1,KCNMA1,RBMS1,CDH13,TKT,CFAP54,PDZRN3,RBMS3,MATN2,ITIH5,PLEKHH2,SEMA3C,LAMA4,LEF1,PAPLN,SEMA3G,FAM129A,SLC5A10,THBS1,AURKB,NCALD,DLL4,NEURL1B,ABLIM1,SLIT1,SLIT2,RUNX1T1,GSN,PRRX1,KCNB1,VEGFC,NR1H3,SORBS2,LHFPL2,FMO4,SLC8B1,LYVE1,SORL1,MEIS2,SULF2,MAB21L3,COL3A1,SLCO3A1,CSDC2,KIF26B,PCDHB16","510","493.0","Tshz2","false","false","Cluster 2","Clustered","8.672727272727272","0","ENSMUSG00000047907"
"780","","",,,"Gjb1","false","false","Cluster 2","Clustered","9.301470588235293","0","ENSMUSG00000047797"
"1803","","",,,"Pank1","false","false","Cluster 2","Clustered","8.454545454545455","0","ENSMUSG00000033610"
"2826","","",,,"#N/A","false","false","Cluster 2","Clustered","9.35897435897436","0","mmu-miR-125b-5p"
"774","","",,,"Cd24a","false","false","Cluster 2","Clustered","9.34640522875817","0","ENSMUSG00000047139"
"772","","",,,"Gchfr","false","false","Cluster 2","Clustered","9.847619047619048","0","ENSMUSG00000046814"
"1793","","",,,"Tmprss7","false","false","Cluster 2","Clustered","8.901098901098901","0","ENSMUSG00000033177"
"1792","","",,,"Slc22a15","false","false","Cluster 2","Clustered","9.12087912087912","0","ENSMUSG00000033147"
"767","","",,,"Fam43a","false","false","Cluster 2","Clustered","9.371428571428572","0","ENSMUSG00000046546"
"1791","","",,,"Rnf125","false","false","Cluster 2","Clustered","9.005847953216374","0","ENSMUSG00000033107"
"1790","","",,,"Tbc1d4","false","false","Cluster 2","Clustered","9.545454545454547","0","ENSMUSG00000033083"
"765","","",,,"Nme9","false","false","Cluster 2","Clustered","9.12087912087912","0","ENSMUSG00000046242"
"764","","",,,"Plaur","false","false","Cluster 2","Clustered","9.202614379084968","0","ENSMUSG00000046223"
"762","","",,,"Hpcal4","false","false","Cluster 2","Clustered","8.590909090909092","0","ENSMUSG00000046093"
"761","","",,,"Igfals","false","false","Cluster 2","Clustered","8.941520467836257","0","ENSMUSG00000046070"
"1784","","",,,"Pkd1","false","false","Cluster 2","Clustered","9.410526315789474","0","ENSMUSG00000032855"
"760","","",,,"Eid2","false","false","Cluster 2","Clustered","9.102564102564102","0","ENSMUSG00000046058"
"757","","",,,"Sh3tc2","false","false","Cluster 2","Clustered","8.672727272727272","0","ENSMUSG00000045629"
"755","","",,,"Cxcr4","false","false","Cluster 2","Clustered","8.857142857142858","0","ENSMUSG00000045382"
"754","","",,,"Sh2d5","false","false","Cluster 2","Clustered","8.50909090909091","0","ENSMUSG00000045349"
"751","","",,,"Arhgef37","false","false","Cluster 2","Clustered","8.590909090909092","0","ENSMUSG00000045094"
"748","","",,,"Fzd1","false","false","Cluster 2","Clustered","8.5","0","ENSMUSG00000044674"
"747","ARCHS4 Coexpression,347;Enrichr Queries,42;GTEx Coexpression,488","IL1RN,AHCYL2,AQP8,RORA,CWH43,CELSR1,AQP3,SLC4A4,CLU,TGM1,LGALS3,NIPAL2,CHEK2,CHP2,PLCE1,CYP1B1,SLC25A43,SOX9,NCKAP5,FADS1,EPHB3,TGM2,EPHA4,SEMA6A,KRT4,IGFBP5,LIMCH1,SEMA6D,DNAAF1,WNT5A,IGFBP2,SPNS2,NPNT,SLC9A3,ERN2,COL4A2,COL4A1,MALL,LGALS12,LY6D,MAL,EPHA1,PLPP3,NBL1,CDS1,PARM1,IGSF3,EPAS1,CAPSL,TSHZ2,ALOX15,PLA2G3,IL20RB,CACNA1A,PLD1,APCDD1,FBLN2,NDRG1,NPAS2,RAP1GAP,CFAP126,HSD11B2,ALDH3B1,S100A14,RREB1,ST3GAL1,PPARGC1A,FAM83B,TGFB2,ARHGEF37,NEBL,BDNF,FN1,FZD9,IFFO2,RAB27B,PTK6,INHBB,FER1L6,GADD45G,TMEM231,SDK1,CXCL10,ARHGAP32,BMP2,RAET1E,COL1A2,LPAR5,FXYD3,MYO5B,BHLHE40,ID4,SLC26A3,CDKN1C,COL18A1,PIGR,CCDC120,TENM4,LRRC10B,LAMC2,ADM,TFCP2L1,DMKN,WFDC2,SH3PXD2A,EFCAB1,PGM2,TIMP3,CNGA4,CFAP45,CERS3,FGFBP1,CAMK1D,MME,TNFRSF19,MYOF,TMEM40,GFRA1,SERPINB5,ACTA2,TGFBR3,ANO1,GPRC5B,PTP4A3,PLCB4,PXDN,KIT,KCNMA1,TFF3,CDH13,DSG3,PDZRN3,MGLL,ITGA9,MATN2,RBMS3,CEBPA,KANK1,DNAH2,RGS16,FAM129A,CXCR4,SEMA3F,BARX2,THBS1,THSD4,AURKB,NCALD,FAM129B,SCEL,ABLIM1,NWD1,RASSF10,CAMK2N1,GNA11,ERBB2,KLRG2,SLIT1,AGR2,MAL2,SLIT2,HES2,CBR3,GPR157,MPZL2,RUNX1T1,EGLN3,GSN,IRX4,CYP4B1,FOXJ1,GRHL3,NMNAT2,FMO4,OTOP3,SORL1,MEIS2,MAPK15,DHRS3,MAPK13,SULF2,MYO1D,RSPH1,TPPP3,FRAS1,DHRS9,KIF26B,PCDHB16,NECTIN4","217","292.3","Zbtb7c","false","false","Cluster 2","Clustered","9.716666666666667","0","ENSMUSG00000044646"
"1770","","",,,"Crtap","false","false","Cluster 2","Clustered","9.0","0","ENSMUSG00000032431"
"1768","","",,,"Dapk2","false","false","Cluster 2","Clustered","9.230769230769232","0","ENSMUSG00000032380"
"742","","",,,"Pcsk9","false","false","Cluster 2","Clustered","8.857142857142858","0","ENSMUSG00000044254"
"739","","",,,"Eml6","false","false","Cluster 2","Clustered","9.441666666666666","0","ENSMUSG00000044072"
"1759","","",,,"Paqr5","false","false","Cluster 2","Clustered","9.0","0","ENSMUSG00000032278"
"734","","",,,"Fam89a","false","false","Cluster 2","Clustered","9.625","0","ENSMUSG00000043068"
"726","","",,,"Tnfrsf14","false","false","Cluster 2","Clustered","8.901098901098901","0","ENSMUSG00000042333"
"724","","",,,"Sgsm3","false","false","Cluster 2","Clustered","9.625","0","ENSMUSG00000042303"
"723","ARCHS4 Coexpression,9;Enrichr Queries,35;GTEx Coexpression,546","SPON2,CPNE8,ZDHHC2,MYLK,GLS,GJA1,CREB3L4,CHEK2,RASSF6,DPYSL3,MYB,CYP1B1,PLCE1,SOX9,MNX1,WLS,CHGB,EPHA4,EPHA7,TRIQK,ENTPD3,LIMCH1,KCNK16,TM4SF4,VWA5B2,EML1,EML5,RFX6,MAP1B,RRAGD,HOXB3,KCTD12,NBL1,STX1A,BEX4,BEX2,NRN1,GIPR,ARX,RDH11,TSPAN2,PPARGC1A,NKX2-2,GSTM2,JUN,FER1L4,PTPRN2,ABCA5,PLK2,ST8SIA3,FN1,IGF2,FZD9,SLC16A12,A1CF,PGA5,ST18,GADD45G,ATP4A,COL1A2,PKIA,FXYD2,ID4,PAM,ITM2C,CDKN1C,PCSK1,BTG2,PTPRN,ICA1,ADM,ROBO1,DNER,NEFL,TIMP3,NEFM,FFAR1,TMED6,EDARADD,TMED8,SLC2A13,GFRA1,PAX6,SLC35G2,PROX1,FAM222A,SLC7A8,PXDN,KIT,KCNMA1,TFF2,PDZRN3,MATN2,SAMD5,CRYBA2,CXCR4,HOXD13,PTGS2,GNAI1,PAPSS2,SLC7A3,MFSD4A,CAMK2N1,PLAGL1,GCNT4,MSX1,PAK3,SPDEF,RUNX1T1,EGLN3,F10,KCNB2,GCG,TMCO4,POU4F1,GCK,SULF2,COL3A1,TTC8,SGSM3,A4GNT,QPCT,PCDHB16,RIMBP2,GHRL,FOXA1,RAB3C,TUSC3,GOLT1A,LOXL4,CELSR1,ETS1,LCLAT1,RGS4,RIMS2,SCGN,CAPN8,EFEMP1,DACH1,FGF9,CDH2,KIF5C,BASP1,SCMH1,HADH,RGS9,CASR,SEMA6A,IGFBP5,KCNH6,FST,SEMA6D,WNT5A,IGFBP2,ANXA10,SHISA2,NPNT,OLFM1,SELENOM,SMO,SCG5,SCG3,SCG2,KHDRBS3,PARM1,GPR119,CACNA1A,SLC38A11,FBLN1,NEUROD1,PCSK1N,NPTX2,TAC1,CPA6,RAI2,TGFB2,CBX6,BDNF,EPHX2,DNAJC12,EVX1,SSC5D,SYT7,CXCL10,BMP2,MAP3K15,PLCXD3,TMEM236,BAMBI,RCAN2,FEV,BHLHE40,RCAN3,CPE,LRP11,SNAP25,PSCA,PDE3B,BOC,ARFGEF3,ABCC8,ETV1,SSTR1,SYNGR4,SSTR3,ADRA2A,ACTA2,DNAJC3,ALDH1A3,PTP4A3,SETBP1,ALDH1A1,ACPP,SMIM24,LEF1,CRMP1,SEMA3E,THBS1,CXXC4,AURKB,GNG4,SLITRK6,SLIT2,SLC36A4,SEC11C,CHGA,PRRX1,CADPS,PDX1,SYT14,SYT13,MBOAT4,MEIS2,TTC39A,FAM167A,P2RX2,SERHL,ASXL3,INSM1,UNC79","99","196.7","Isl1","false","false","Cluster 2","Clustered","10.011396011396013","0","ENSMUSG00000042258"
"1746","","",,,"Rexo2","false","false","Cluster 2","Clustered","8.666666666666668","0","ENSMUSG00000032026"
"1745","","",,,"Oaf","false","false","Cluster 2","Clustered","8.672727272727272","0","ENSMUSG00000032014"
"721","","",,,"Klhdc8a","false","false","Cluster 2","Clustered","9.463235294117649","0","ENSMUSG00000042115"
"720","","",,,"Csdc2","false","false","Cluster 2","Clustered","9.34640522875817","0","ENSMUSG00000042109"
"1743","","",,,"Ctrb1","false","false","Cluster 2","Clustered","8.857142857142858","0","ENSMUSG00000031957"
"718","","",,,"Dao","false","false","Cluster 2","Clustered","10.153846153846155","0","ENSMUSG00000042096"
"716","","",,,"Igsf3","false","false","Cluster 2","Clustered","9.487179487179487","0","ENSMUSG00000042035"
"715","","",,,"Fam222a","false","false","Cluster 2","Clustered","9.797101449275363","0","ENSMUSG00000041930"
"1739","","",,,"Hsd11b2","false","false","Cluster 2","Clustered","9.010989010989011","0","ENSMUSG00000031891"
"713","","",,,"Coq5","false","false","Cluster 2","Clustered","9.010989010989011","0","ENSMUSG00000041733"
"709","","",,,"Hspb8","false","false","Cluster 2","Clustered","8.583333333333332","0","ENSMUSG00000041548"
"708","","",,,"Ccnb1","false","false","Cluster 2","Clustered","8.571428571428571","0","ENSMUSG00000041431"
"707","","",,,"Dmxl2","false","false","Cluster 2","Clustered","8.583333333333332","0","ENSMUSG00000041268"
"706","","",,,"Arhgap11a","false","false","Cluster 2","Clustered","9.382352941176471","0","ENSMUSG00000041219"
"1729","","",,,"Mt1","false","false","Cluster 2","Clustered","9.847619047619048","0","ENSMUSG00000031765"
"1728","","",,,"Ces1f","false","false","Cluster 2","Clustered","9.102564102564102","0","ENSMUSG00000031725"
"2748","","",,,"#N/A","false","false","Cluster 2","Clustered","9.12087912087912","0","mmu-miR-1945"
"699","","",,,"Pif1","false","false","Cluster 2","Clustered","9.382352941176471","0","ENSMUSG00000041064"
"698","","",,,"Wwp1","false","false","Cluster 2","Clustered","9.246753246753247","0","ENSMUSG00000041058"
"697","","",,,"Fam117b","false","false","Cluster 2","Clustered","9.9","0","ENSMUSG00000041040"
"1718","","",,,"Vegfc","false","false","Cluster 2","Clustered","9.696969696969697","0","ENSMUSG00000031520"
"694","","",,,"Slc19a2","false","false","Cluster 2","Clustered","9.202614379084968","0","ENSMUSG00000040918"
"2741","","",,,"A730020M07Rik","false","false","Cluster 2","Clustered","9.852631578947369","0","ENSMUSG00000044522"
"693","","",,,"Plekhh2","false","false","Cluster 2","Clustered","8.416666666666666","0","ENSMUSG00000040852"
"2740","","",,,"2810404F17Rik","false","false","Cluster 2","Clustered","9.463235294117649","0","ENSMUSG00000085329"
"691","","",,,"Dok4","false","false","Cluster 2","Clustered","8.666666666666668","0","ENSMUSG00000040631"
"689","","",,,"Os9","false","false","Cluster 2","Clustered","9.010989010989011","0","ENSMUSG00000040462"
"688","","",,,"Spns2","false","false","Cluster 2","Clustered","8.742105263157896","0","ENSMUSG00000040447"
"687","ARCHS4 Coexpression,611;Enrichr Queries,979;GTEx Coexpression,1392","BTG2,SPARC,IRS1,GBE1,CELF2,LY75,PTPRM,RORA,PLOD2,SLC7A11,NR3C1,CELSR1,MKI67,ETS1,SYNE2,ELK3,SYNE1,MYLK,GLS,LGALS3,ZC3H12C,SH3PXD2A,SALL2,SACS,CAPN2,TIMP2,ANXA6,TIMP3,ITGB7,SBF2,IER3,PPP1R16B,KLF12,ANXA1,LIMCH1,CHPF2,ITGA2,MYOF,AFAP1,PRKCA,ARL4C,PTP4A3,MAP1B,CDC42EP3,PXDN,KCNMA1,PLPP3,PHLDB2,VGLL3,MACF1,SEC23A,PFKFB3,EPAS1,LAMA4,FAM129A,ITPR1,THBS1,NDRG1,AURKB,FAM129B,CAMSAP2,ABLIM1,CALD1,FLNA,CHML,ST3GAL1,RAB11FIP5,PRNP,JUN,MARCKSL1,GSN,PRRX1,ATP8B2,TIPARP,CAV2,PLK2,AHNAK2,FN1,CRIM1,VEGFC,FBXO32,PTPN14,SORL1,DCBLD2,KLF7,EHD2,NCEH1,PCDHB16,BHLHE40,MDM2,FAT4,NECTIN3,ITM2C","1144","994.0","Zbtb38","false","false","Cluster 2","Clustered","9.005847953216374","0","ENSMUSG00000040433"
"1711","","",,,"Bgn","false","false","Cluster 2","Clustered","8.50909090909091","0","ENSMUSG00000031375"
"1710","","",,,"Ap1s2","false","false","Cluster 2","Clustered","9.35897435897436","0","ENSMUSG00000031367"
"686","","",,,"Pitpnc1","false","false","Cluster 2","Clustered","9.625","0","ENSMUSG00000040430"
"2733","","",,,"AW112010","false","false","Cluster 2","Clustered","8.50909090909091","0","ENSMUSG00000075010"
"2732","","",,,"2310043O21Rik","false","false","Cluster 2","Clustered","9.418300653594772","0","ENSMUSG00000102106"
"683","","",,,"Ndufa4l2","false","false","Cluster 2","Clustered","8.812865497076023","0","ENSMUSG00000040280"
"679","","",,,"Bub1b","false","false","Cluster 2","Clustered","9.35897435897436","0","ENSMUSG00000040084"
"678","","",,,"Spsb1","false","false","Cluster 2","Clustered","9.35897435897436","0","ENSMUSG00000039911"
"2725","","",,,"RP24-499N24.6","false","false","Cluster 2","Clustered","8.791208791208792","0","ENSMUSG00000111528"
"2723","","",,,"Gm27162","false","false","Cluster 2","Clustered","8.672727272727272","0","ENSMUSG00000099025"
"2721","","",,,"Gm44955","false","false","Cluster 2","Clustered","8.812865497076023","0","ENSMUSG00000109084"
"673","","",,,"Sdk1","false","false","Cluster 2","Clustered","9.12087912087912","0","ENSMUSG00000039683"
"672","","",,,"Zdhhc2","false","false","Cluster 2","Clustered","8.50909090909091","0","ENSMUSG00000039470"
"1692","","",,,"Aqp8","false","false","Cluster 2","Clustered","10.035087719298247","0","ENSMUSG00000030762"
"1690","","",,,"Nupr1","false","false","Cluster 2","Clustered","10.431372549019608","0","ENSMUSG00000030717"
"666","","",,,"Prune2","false","false","Cluster 2","Clustered","8.5","0","ENSMUSG00000039126"
"665","ARCHS4 Coexpression,570;Enrichr Queries,1222;GTEx Coexpression,314","CHIC1,NRROS,IRS1,STMN3,RORA,CWH43,CELSR1,NR3C1,MKI67,AQP3,ETS1,MYLK3,KIF5C,MYB,DENND5A,CCDC92,SAMD12,MAGI2,ACOT11,TTC7B,PRKCA,CPT1C,CLIP3,LY6D,EPHA1,PFN2,MACF1,BEX3,NDRG4,IGSF3,EPAS1,ARL3,ITPR1,GPR85,ITPR2,CACNA1A,NDRG1,SCUBE1,NLRP6,MAP2,NACC2,MAP6,S100A14,KIF3C,ST3GAL1,RAB6B,FAM83B,MAP9,PPARGC1B,ZBTB7C,PRNP,CBX6,JUN,MGAM,FN1,DCLK2,RAB39B,NFATC2,PTK6,CORO2B,GNAO1,SULT1B1,RAET1E,MYO5B,REEP2,BHLHE40,SERINC1,DNAL1,ITM2C,TRIM72,BTG2,CCDC120,SYNE3,SYNE2,TUBA1B,TUBA1A,SCRN1,SH3PXD2A,ADAMTSL4,DDI2,HNF4A,TPI1,PGAM1,ITPK1,MYOF,H2AFV,TMEM40,FAM219A,TGFBR3,PTP4A3,TUBB2A,PXDN,BMP2K,RBMS1,DSG3,PPARA,PAFAH1B3,GAPDH,MAGEH1,KANK1,CEBPA,CRMP1,SEMA3F,ADD3,BARX2,THBS1,AURKB,FAM129B,MROH1,SCEL,ABLIM1,RXRA,SV2A,MAL2,APBB1,HES2,GPR157,MPZL2,GDF11,CDKN2B,MARCKSL1,GSN,SGTB,GRHL3,SORL1,MEIS2,MAPK13,ABI2,SYT11,TCEA2,TRIM38,NECTIN4,FRYL","811","702.0","Rreb1","false","false","Cluster 2","Clustered","9.34640522875817","0","ENSMUSG00000039087"
"663","","",,,"Osbpl2","false","false","Cluster 2","Clustered","9.246753246753247","0","ENSMUSG00000039050"
"1687","ARCHS4 Coexpression,1426;Enrichr Queries,103;GTEx Coexpression,347","FOXA1,FCGBP,ANKLE1,STMN3,CELSR1,ESPN,RIMS4,CHEK2,PALM,MYB,SOX9,CHAC1,SH2D5,SLC16A3,FADS1,RGS7,PLS1,IER3,WNT5B,SLC30A2,FST,ANXA13,SYTL1,KCTD1,HPCAL4,ISL1,OVOL2,FAM227A,CLDN4,SOAT2,MAP1A,LGALS12,ADAM8,NUPR1,LMX1B,BRSK1,EPAS1,CACNA1A,GATA4,LPAR3,RAP1GAP,ADGRG1,KLC3,SCIN,MAP2,STC2,HMOX1,B4GALNT1,KIF3C,RAB6B,WNT3,PACSIN1,FN3K,NGFR,PRNP,SYT3,JUN,MAGEE1,VDR,TMEM132A,FZD9,MYO5A,TRPV3,NETO2,NR1D1,GADD45G,FOSL1,EFNA1,CXCL10,PKIB,EFNA3,NCEH1,BFSP1,DLG4,BHLHE40,NFE2L3,SP5,COL9A3,ZBTB8B,LRP11,ITM2C,RET,COL18A1,BTG2,CITED4,TCF23,ATP2A3,HSPB1,LAMC2,ADM,TFCP2L1,SLC7A11,WFDC2,SERP2,C1QTNF1,CAMKV,GDAP1L1,IDS,KIF1A,SULT4A1,ABCD1,KRT222,EDN1,PIANP,TNFRSF19,SYP,REXO2,SYN2,ETV4,SYN1,ETV5,ARL4C,ALDH1A3,FAM234B,PTP4A3,TUBB2A,PXDN,KIT,ARHGEF4,BIRC5,PTRH1,PAFAH1B3,MGLL,SHANK2,NAPB,NIM1K,SEMA3C,ATL1,LAMA4,LEF1,ZDHHC24,SNX32,THBS1,PPM1E,AURKB,DLL3,RASD2,RASD1,SV2A,CAMK2N1,ATOH8,E2F2,FSD1,MSX1,HES2,GABBR2,CGREF1,ARNT2,EGLN3,CDKN2B,LIMK1,LHFPL5,GRHL3,FBXL16,FMO4,KBTBD11,GRIN1,SULF2,TTC9,COL3A1,KRT18,MORN4,FKBP1B,PCDHB16,FOSB,APBA1,CDK5R1","693","625.3","Mesp2","false","false","Cluster 2","Clustered","9.952380952380953","0","ENSMUSG00000030543"
"1686","","",,,"Blm","false","false","Cluster 2","Clustered","9.35897435897436","0","ENSMUSG00000030528"
"2708","","",,,"Pvt1","false","false","Cluster 2","Clustered","8.901098901098901","0","ENSMUSG00000097039"
"659","","",,,"A230050P20Rik","false","false","Cluster 2","Clustered","8.583333333333332","0","ENSMUSG00000038884"
"2705","","",,,"C430039J16Rik","false","false","Cluster 2","Clustered","8.836363636363636","0","ENSMUSG00000097932"
"657","","",,,"Sema6c","false","false","Cluster 2","Clustered","9.010989010989011","0","ENSMUSG00000038777"
"1680","","",,,"Itpr2","false","false","Cluster 2","Clustered","9.545454545454547","0","ENSMUSG00000030287"
"1679","","",,,"Ldhb","false","false","Cluster 2","Clustered","10.057142857142857","0","ENSMUSG00000030246"
"654","","",,,"Capn8","false","false","Cluster 2","Clustered","10.461904761904762","0","ENSMUSG00000038599"
"1676","","",,,"Clec2e","false","false","Cluster 2","Clustered","8.50909090909091","0","ENSMUSG00000030155"
"651","","",,,"Spsb2","false","false","Cluster 2","Clustered","9.98550724637681","0","ENSMUSG00000038451"
"650","","",,,"Ttk","false","false","Cluster 2","Clustered","9.010989010989011","0","ENSMUSG00000038379"
"2697","","",,,"2900076A07Rik","false","false","Cluster 2","Clustered","9.463235294117649","0","ENSMUSG00000097277"
"1673","","",,,"Gkn3","false","false","Cluster 2","Clustered","9.545454545454547","0","ENSMUSG00000030048"
"648","","",,,"Plcl1","false","false","Cluster 2","Clustered","9.010989010989011","0","ENSMUSG00000038349"
"2695","","",,,"D130017N08Rik","false","false","Cluster 2","Clustered","9.382352941176471","0","ENSMUSG00000097287"
"2694","","",,,"4933404O12Rik","false","false","Cluster 2","Clustered","9.010989010989011","0","ENSMUSG00000097908"
"2693","","",,,"4632411P08Rik","false","false","Cluster 2","Clustered","9.545454545454547","0","ENSMUSG00000097561"
"644","","",,,"Mylip","false","false","Cluster 2","Clustered","9.130718954248367","0","ENSMUSG00000038175"
"2689","","",,,"Gm12603","false","false","Cluster 2","Clustered","8.454545454545455","0","ENSMUSG00000085183"
"638","","",,,"Tgm2","false","false","Cluster 2","Clustered","9.202614379084968","0","ENSMUSG00000037820"
"2685","","",,,"Gm32391","false","false","Cluster 2","Clustered","9.533333333333333","0","ENSMUSG00000104011"
"633","","",,,"Cdkn1c","false","false","Cluster 2","Clustered","10.057142857142857","0","ENSMUSG00000037664"
"631","","",,,"Kcnk2","false","false","Cluster 2","Clustered","9.0","0","ENSMUSG00000037624"
"630","ARCHS4 Coexpression,83;Enrichr Queries,137;GTEx Coexpression,296","SPARC,MYLK,LIPE,RPS6KA2,GJA4,PLCE1,CYP1B1,SOX9,IER3,LIMCH1,IL1R1,AFAP1,P3H3,HSPG2,SERPING1,MXRA7,PLPP3,MYL9,NBL1,RETSAT,EPAS1,ADAMTS15,CYB5R3,TSPAN4,HMOX1,ST3GAL1,RAB11FIP5,FZD1,JUN,FZD4,PLK2,MCAM,FN1,RAB39B,BRI3BP,TRERF1,GADD45G,EHD2,COL1A2,ID4,RGL3,FERMT2,ITM2C,CDKN1C,COL18A1,BTG2,TGFB1I1,PTPRM,ADM,PEAR1,C1QTNF1,SH3PXD2A,ANKRD1,TIMP2,ANXA6,TIMP3,LMCD1,ZCCHC24,EDN1,ANXA1,MME,IL15,MYOF,BGN,COPZ2,MRAS,PLSCR4,PXDN,GAS6,PAFAH1B3,CRYAB,MGLL,MATN2,TAGLN,GREB1L,SNX33,PTGS2,FAM129B,GPC1,FLNA,FLNC,GSN,VEGFC,SORBS2,FMO2,FMO4,SORBS3,DHRS3,SULF2,COL3A1,KIF26B,FOSB,MSRB3,CRLF1,CSF1,CHPF,IRS1,GALNT18,ROGDI,CELSR1,ETS1,CLU,FADS3,EFEMP2,EFEMP1,TBC1D31,PLS3,PDE8B,TGM2,SCARA3,IGFBP5,WNT5B,FST,WNT5A,IGFBP2,NPNT,PDGFRL,COL4A2,COL4A1,MAP7D1,SELENOP,GPD1,SIDT1,RELL2,PHLDB2,PARM1,NPR1,LPL,FBLN2,NDRG1,ACACB,GLIS2,SLC9A3R2,ADGRG1,CALHM2,CALD1,IGFBP7,RAI2,TGFB2,CRTAP,CAV2,TGFB3,CRIM1,INHBB,SSC5D,FBXO32,CORO2B,CXCL10,BMP2,NR4A3,RCAN2,BHLHE40,ESAM,AMOTL2,MXD4,ACADVL,ITGB5,CPQ,HSPB8,FHL1,HSPB1,ALDH2,SCARF2,BOK,ADAMTS7,SUN2,CHPF2,KLF15,CKAP4,PARD3B,ARL4C,ACTA2,TGFBR3,PTP4A3,ALDH1A1,COL6A1,ITGA7,EVL,ITGA5,RBMS3,SEMA3C,LRP1,LAMA4,SEMA3G,CXXC5,THBS1,AURKB,RASD1,GNA11,SLIT1,SLC12A4,PRRX1,CYP4B1,SLC4A8","84","172.0","Atoh8","false","false","Cluster 2","Clustered","9.600000000000001","0","ENSMUSG00000037621"
"629","","",,,"Osbpl5","false","false","Cluster 2","Clustered","9.139705882352942","0","ENSMUSG00000037606"
"1653","","",,,"Pla2g1b","false","false","Cluster 2","Clustered","9.0","0","ENSMUSG00000029522"
"627","","",,,"Kcnh3","false","false","Cluster 2","Clustered","9.490196078431373","0","ENSMUSG00000037579"
"1651","","",,,"P2rx4","false","false","Cluster 2","Clustered","8.857894736842105","0","ENSMUSG00000029470"
"625","ARCHS4 Coexpression,407;GTEx Coexpression,1008","DENND1C,IFITM1,NRROS,CD83,PLEK,NRM,ITGAL,RCSD1,TNF,ICAM1,LIMD2,PSTPIP1,GLIPR1,ADGRE5,FCGRT,RASSF5,NAMPT,PIM2,PPP1R16B,CD53,SUN2,CSGALNACT2,PLAUR,TMC8,TMEM173,VAV1,SYTL3,APBB1IP,FGR,DOK3,RASA3,DDAH2,IRF1,MFNG,RIN3,ADAM8,PLEKHO1,PLEKHO2,CARD11,TLR2,C1QA,GRAMD1A,AKNA,PFKFB3,PTAFR,RLF,STX11,TMEM71,FGD3,DPP7,SH3BP1,SPOCK2,ALOX5,SARAF,TNFRSF14,CARMIL2,RNF24,TRPV2,RAB27A,MSN,BMX,ISG20,CCDC88B,FMNL3,PTPRE,RIT1,PIK3IP1,MAFK,TRIM38","817","707.5","Arid5a","false","false","Cluster 2","Clustered","9.91578947368421","0","ENSMUSG00000037447"
"1647","","",,,"Naaa","false","false","Cluster 2","Clustered","8.672727272727272","0","ENSMUSG00000029413"
"621","","",,,"Rims2","false","false","Cluster 2","Clustered","9.102564102564102","0","ENSMUSG00000037386"
"1644","","",,,"Rassf6","false","false","Cluster 2","Clustered","8.666666666666668","0","ENSMUSG00000029370"
"620","","",,,"Spon2","false","false","Cluster 2","Clustered","9.12087912087912","0","ENSMUSG00000037379"
"619","ARCHS4 Coexpression,944;Enrichr Queries,399;GTEx Coexpression,290","SPARC,TMEM94,CELSR1,SOGA1,ETS1,CELSR3,HID1,LGALS3,SALL2,FCGRT,SESN1,LONP1,CYP1B1,PPFIA4,FADS1,TGM2,IER3,BNIP3L,MYLIP,TLE2,GABARAPL1,RBFOX3,IGFBP5,F2R,MYT1,DISP2,ACAP3,GPR162,WDR81,RAB37,MAP7D1,MADD,SELENOP,S100A6,ANKS6,KCTD12,NUPR1,PLPP3,SQSTM1,NBL1,LY6E,EPAS1,STXBP1,INSIG1,CACNA1A,NREP,NDRG1,NEUROD1,SLC9A3R2,IGSF21,NEUROD2,ADGRG1,LDHA,PCBP3,PCBP4,NACC2,NPTX1,TMEM120B,PRNP,JUN,CARMIL3,OSBPL5,PLK2,NBEAL2,ABCA7,L1CAM,FBXO32,GADD45G,PKIB,XKR7,BHLHE40,PRR36,MAP3K12,ITM2C,BTG2,ACADVL,TMEM151B,KCNC1,ITGB5,MTCL1,SLC2A1,HSPB1,ADM,PKD1,SYNE1,SHF,UNC80,MMP24,PCLO,GRM4,TUBA1A,FAM102A,SH3PXD2A,MCF2L,TRIM3,TIMP2,ANXA6,RAC3,TCP11L2,TIMP3,CTSF,TRIM67,HIST1H1C,BOK,SMIM14,ZCCHC24,SUN2,ANXA1,ABCC8,CHPF2,PLEKHG5,ITPK1,ETV1,PAX6,KCNAB3,AP3B2,ACTA2,TGFBR3,PTP4A3,INF2,IRF1,PXDN,GAS6,MGLL,CEBPA,LRP1,PLPPR2,CXCR4,CRIP2,LRP3,CXXC5,FAM214A,THBS1,AURKB,CST3,RXRA,CAMK2N1,GNA11,MXI1,UCP2,CKB,RABAC1,GABRD,RUNX1T1,PURG,MUTYH,MARCKSL1,SLC12A4,GSN,KLHL3,SORBS3,DHRS3,STXBP5L,SULF2,PFKL,PIK3IP1,PCDHB16,INSM1,COQ8A,UNC79,YPEL3,TMEM229B","582","544.3","Mxd4","false","false","Cluster 2","Clustered","9.663157894736841","0","ENSMUSG00000037235"
"1642","","",,,"Crybb1","false","false","Cluster 2","Clustered","8.672727272727272","0","ENSMUSG00000029343"
"617","Literature ChIP-seq,118;ARCHS4 Coexpression,252;Enrichr Queries,341;ReMap ChIP-seq,96;GTEx Coexpression,485","CNTFR,ANKLE1,MT-ND5,SPARC,PANK3,CHIC1,FAM89B,GLDC,STMN3,IFI30,MKI67,PTPDC1,SAMD14,GJA1,DPYSL5,CREB3L4,CHEK2,RASSF5,DPYSL3,MYB,LONP1,CYP1B1,KIF21A,SOX9,HIST3H2BA,SKP2,HOXA5,HOXA4,IER3,GAMT,HES7,TMEM88B,EPHA4,PAQR4,PAQR5,ADGRA3,P3H3,MFSD11,CPT1C,MTURN,MAPK8IP1,CLDN6,CYP39A1,GPR162,EML5,HOXB9,CLDN9,SOAT2,HOXB4,JTB,HOXB3,MXRA7,DNA2,HOXB8,PLPP3,CTXN1,STX1A,GPLD1,LIPT1,ABCB6,IGSF3,EPAS1,NCAPG,SLCO5A1,LDHB,CRACR2B,PCBP4,TSPAN4,RAB11FIP4,SLC19A1,LHPP,RBM11,NKX2-2,SPTBN2,CDK18,TRAP1,PRELID2,JUN,FZD3,CADM4,STAC,PLK2,FZD7,DCLK3,FN1,FZD9,NFATC3,PYCR1,ABCA7,NR1D1,GADD45G,FOSL1,FA2H,XKR7,PEX5L,RAET1E,TH,H2AFY2,MYO5B,COL9A3,CDKN1C,RET,BTG2,TMEM151B,ACY1,ICA1,SLC35F1,GPT,ADM,KIF11,PEAR1,CLYBL,KHK,GYS1,TUBA1A,FAM102A,C1QTNF1,CSRP2,ADAMTSL4,TIMP2,PBK,RAC3,TIMP3,TK1,PSD,NDC1,HELLS,PCYT1B,ATP6V0B,TPI1,TNFRSF12A,ROM1,BGN,COPZ2,TMC8,ELOVL6,TUBG2,MANEAL,GPRC5B,PLCB3,FAM222A,INF2,PXDN,KIT,RAPGEF5,ALDOA,PAFAH1B3,MPND,VAMP2,DBN1,CD63,CXCR4,CRIP2,HOXD13,CRIP1,GRAMD4,MFSD4A,RXRA,CARNS1,FLNA,CKB,FLNC,CHML,EMC9,RUNX1T1,CDKN2D,CENPU,EGLN3,SLC16A1,BMP8B,KLHL3,NMNAT2,POU4F1,GRIN1,SULF2,SPSB2,SH3RF2,CYP2W1,CENPF,COL3A1,HIST3H2A,CLCF1,KIF26B,TCEA2,FOSB,NCAPD2,ESYT1,B9D2,TMEM229A,CD68,RAMP1,YPEL3,MAD2L1,EXOC3L4,CHPF,IRS1,ZWILCH,CHRM4,KLHL32,BUB1B,JADE2,CELSR1,FRY,ETS1,CNDP1,RGS4,SLC25A48,RGS5,EFEMP2,RIMS4,CDH2,SALL2,FCGRT,KIF5C,BASP1,ADORA1,SACS,NEK1,PLXNC1,SLC16A3,CCDC160,KCNH2,GEN1,PCYT2,SEMA6A,IGFBP5,FST,TMOD2,APLP1,WNT5A,F2R,IGFBP2,MITF,SHISA2,NEAT1,DISP2,ACAP3,ERN2,MYCN,DOK4,COL4A1,GPRIN1,TBC1D24,S100A6,S100A5,SLC25A53,SQSTM1,SLC27A5,SHC4,RTN2,KHDRBS3,TROAP,ABHD8,LPL,NREP,KLHL13,NDRG2,CPLX2,NDRG1,PHF21B,SLC9A3R2,CCNB2,CCNB1,DPP7,HRH3,PODXL,NACC2,ALDH3B1,UAP1L1,CYC1,MYH10,ANKZF1,TGFB2,SDF2L1,ACBD4,ARHGEF37,HMGA1,HMGA2,SSC5D,INHBB,KLHL23,ADAP1,EFNA1,CXCL10,EFNA3,BMP2,PTPRC,DLG4,FEV,BHLHE40,CDK1,MAFK,REEP6,CNIH2,PHF19,GPSM1,SLC25A1,ARHGAP11A,ACADVL,PODXL2,HMGB2,SLC2A1,HSPB1,YBX2,NRARP,SLC2A4,MSLN,FOXM1,LMNB1,DBP,WDR6,BCAS1,TRIM67,IQCB1,ABCC4,CHPF2,OLIG1,ETV1,ETV4,ETV5,ARL4C,CCNA2,PTP4A3,PKM,VGF,ESPL1,IRF1,OAS3,ITGA7,BIRC5,GAPDH,ST6GALNAC4,DTL,ST6GALNAC6,NIM1K,LAMA5,LEF1,SLC5A11,LRP3,TTK,ADD3,CXXC5,THBS1,AURKB,CLN6,AGPAT4,HSPD1,DLL4,SH3TC2,SH3BP1,MVB12B,PRRG1,MXI1,TRIM47,BEND4,IGF2BP3,HES1,NCAM2,FSD1,ALOXE3,MARCKSL1,LINGO3,KCNIP3,AHNAK2,ARID3A,FBXL16,MEIS2,MAPK12,MAPK11,SLC4A8,FAM167A,FMNL2,FAM131A,CHPT1","174","258.4","Mycn","false","false","Cluster 2","Clustered","10.21021021021021","0","ENSMUSG00000037169"
"616","","",,,"Scd1","false","false","Cluster 2","Clustered","8.68421052631579","0","ENSMUSG00000037071"
"611","","",,,"C1qa","false","false","Cluster 2","Clustered","9.9","0","ENSMUSG00000036887"
"1634","","",,,"Sepsecs","false","false","Cluster 2","Clustered","9.12087912087912","0","ENSMUSG00000029173"
"609","","",,,"Syde2","false","false","Cluster 2","Clustered","8.416666666666666","0","ENSMUSG00000036863"
"602","","",,,"Dennd5a","false","false","Cluster 2","Clustered","9.991666666666667","0","ENSMUSG00000035901"
"1624","","",,,"Fgr","false","false","Cluster 2","Clustered","8.5","0","ENSMUSG00000028874"
"598","","",,,"Melk","false","false","Cluster 2","Clustered","8.590909090909092","0","ENSMUSG00000035683"
"1620","","",,,"Macf1","false","false","Cluster 2","Clustered","9.12087912087912","0","ENSMUSG00000028649"
"594","","",,,"Myo1d","false","false","Cluster 2","Clustered","9.968379446640316","0","ENSMUSG00000035441"
"592","","",,,"Pdzrn3","false","false","Cluster 2","Clustered","8.416666666666666","0","ENSMUSG00000035357"
"1616","","",,,"Ttc39a","false","false","Cluster 2","Clustered","9.487179487179487","0","ENSMUSG00000028555"
"591","","",,,"Ssc5d","false","false","Cluster 2","Clustered","9.35897435897436","0","ENSMUSG00000035279"
"586","","",,,"Egln3","false","false","Cluster 2","Clustered","8.583333333333332","0","ENSMUSG00000035105"
"1609","","",,,"Stra6l","false","false","Cluster 2","Clustered","9.487179487179487","0","ENSMUSG00000028327"
"582","","",,,"BC030867","false","false","Cluster 2","Clustered","9.98550724637681","0","ENSMUSG00000034773"
"581","","",,,"Sema3f","false","false","Cluster 2","Clustered","8.590909090909092","0","ENSMUSG00000034684"
"576","","",,,"Neurl1b","false","false","Cluster 2","Clustered","8.857142857142858","0","ENSMUSG00000034413"
"574","","",,,"Zdhhc14","false","false","Cluster 2","Clustered","10.117647058823529","0","ENSMUSG00000034265"
"572","","",,,"Vav1","false","false","Cluster 2","Clustered","10.153846153846155","0","ENSMUSG00000034116"
"1595","","",,,"Cd1d1","false","false","Cluster 2","Clustered","8.761904761904763","0","ENSMUSG00000028076"
"568","","",,,"Ppargc1b","false","false","Cluster 2","Clustered","9.615384615384615","0","ENSMUSG00000033871"
"564","","",,,"Ucp2","false","false","Cluster 2","Clustered","9.230769230769232","0","ENSMUSG00000033685"
"563","","",,,"Ttc7b","false","false","Cluster 2","Clustered","10.352941176470589","0","ENSMUSG00000033530"
"560","","",,,"Gstt2","false","false","Cluster 2","Clustered","9.463235294117649","0","ENSMUSG00000033318"
"559","","",,,"Kctd17","false","false","Cluster 2","Clustered","9.005847953216374","0","ENSMUSG00000033287"
"1582","","",,,"Nbea","false","false","Cluster 2","Clustered","8.672727272727272","0","ENSMUSG00000027799"
"558","","",,,"Shf","false","false","Cluster 2","Clustered","9.284210526315789","0","ENSMUSG00000033256"
"557","","",,,"Ttc28","false","false","Cluster 2","Clustered","8.672727272727272","0","ENSMUSG00000033209"
"556","","",,,"Atp1a1","false","false","Cluster 2","Clustered","9.27450980392157","0","ENSMUSG00000033161"
"1578","","",,,"Slc7a11","false","false","Cluster 2","Clustered","9.35897435897436","0","ENSMUSG00000027737"
"554","","",,,"Lss","false","false","Cluster 2","Clustered","8.666666666666668","0","ENSMUSG00000033105"
"1577","","",,,"Tnik","false","false","Cluster 2","Clustered","10.274725274725276","0","ENSMUSG00000027692"
"552","","",,,"Guca2b","false","false","Cluster 2","Clustered","9.789473684210526","0","ENSMUSG00000032978"
"547","","",,,"Abcc4","false","false","Cluster 2","Clustered","9.608695652173912","0","ENSMUSG00000032849"
"546","","",,,"Troap","false","false","Cluster 2","Clustered","8.666666666666668","0","ENSMUSG00000032783"
"545","","",,,"Slc8b1","false","false","Cluster 2","Clustered","9.952380952380953","0","ENSMUSG00000032754"
"544","","",,,"Ccdc88a","false","false","Cluster 2","Clustered","10.274725274725276","0","ENSMUSG00000032740"
"1567","","",,,"Cd93","false","false","Cluster 2","Clustered","9.010989010989011","0","ENSMUSG00000027435"
"543","","",,,"Snx33","false","false","Cluster 2","Clustered","8.50909090909091","0","ENSMUSG00000032733"
"541","","",,,"37681","false","false","Cluster 2","Clustered","8.952380952380953","0","ENSMUSG00000032656"
"535","ARCHS4 Coexpression,887;Enrichr Queries,573;GTEx Coexpression,1388","ZFAND4,CBLB,RORA,FRY,NR3C1,CELSR1,MKI67,ETS1,DEPTOR,SESN1,CHEK2,SPATA24,MYB,LONP1,NUSAP1,CAPN2,SLC16A3,FADS1,BNIP3L,IGFBP5,F2R,PRKCA,FAM227A,ZC2HC1C,TNIK,SQSTM1,TSPYL5,PFKFB3,EPAS1,INSIG1,ABHD1,ITPR1,PLD5,PIK3R3,FBXO48,NREP,PLCXD1,NDRG1,CCNB1,PRKAR2B,ADAMTS17,MYH10,ST3GAL2,S100A11,PRNP,JUN,FZD3,NFATC3,FN1,FZD9,KLHL23,FBXO32,BHLHE40,CDK1,EBPL,ZBTB8B,MXD4,ITM2C,TRIM72,BTG2,HMGB2,SLC2A1,YBX2,ARRB1,KIF11,SLC2A4,SYNE2,LMNB1,SYNE1,TTC28,KIF15,TCP11L2,KLF12,PLEKHG1,TNFRSF12A,MYOF,ANXA5,KIF24,ELOVL6,ENAH,CCNA2,TGFBR3,ASPM,KIF9,PTP4A3,PKM,RILPL1,IRF1,PXDN,MGLL,RNF32,LEF1,CXCR4,ATP1A1,ADD3,FAM214A,THBS1,FAM117B,AURKB,FAM117A,FAM129B,IFT74,ABLIM1,MXI1,E2F2,STOM,FYN,GSN,SORL1,DHRS3,CENPF,XK,AGBL3,CDKN3,MAD2L1","1090","949.3","Tfdp2","false","false","Cluster 2","Clustered","9.533333333333333","0","ENSMUSG00000032411"
"1559","","",,,"Gfra4","false","false","Cluster 2","Clustered","8.672727272727272","0","ENSMUSG00000027316"
"530","","",,,"Etfa","false","false","Cluster 2","Clustered","8.5","0","ENSMUSG00000032314"
"529","","",,,"Pkm","false","false","Cluster 2","Clustered","9.716666666666667","0","ENSMUSG00000032294"
"528","","",,,"Cln6","false","false","Cluster 2","Clustered","9.891304347826088","0","ENSMUSG00000032245"
"1552","","",,,"Depdc7","false","false","Cluster 2","Clustered","9.230769230769232","0","ENSMUSG00000027173"
"525","","",,,"Sc5d","false","false","Cluster 2","Clustered","10.105263157894736","0","ENSMUSG00000032018"
"1549","","",,,"Dhrs9","false","false","Cluster 2","Clustered","9.952380952380953","0","ENSMUSG00000027068"
"1548","","",,,"Ly75","false","false","Cluster 2","Clustered","9.808333333333334","0","ENSMUSG00000026980"
"523","","",,,"Agt","false","false","Cluster 2","Clustered","9.533333333333333","0","ENSMUSG00000031980"
"521","","",,,"Maml2","false","false","Cluster 2","Clustered","9.463235294117649","0","ENSMUSG00000031925"
"520","","",,,"Pla2g15","false","false","Cluster 2","Clustered","8.91304347826087","0","ENSMUSG00000031903"
"519","","",,,"Bco1","false","false","Cluster 2","Clustered","8.952380952380953","0","ENSMUSG00000031845"
"518","","",,,"Cotl1","false","false","Cluster 2","Clustered","9.716666666666667","0","ENSMUSG00000031827"
"1541","","",,,"Ptges2","false","false","Cluster 2","Clustered","9.463235294117649","0","ENSMUSG00000026820"
"515","","",,,"Eif2ak3","false","false","Cluster 2","Clustered","9.625","0","ENSMUSG00000031668"
"1538","","",,,"Pfkfb3","false","false","Cluster 2","Clustered","8.454545454545455","0","ENSMUSG00000026773"
"1531","","",,,"Cfap45","false","false","Cluster 2","Clustered","8.454545454545455","0","ENSMUSG00000026546"
"507","","",,,"Plat","false","false","Cluster 2","Clustered","8.416666666666666","0","ENSMUSG00000031538"
"506","","",,,"Rasa3","false","false","Cluster 2","Clustered","8.857142857142858","0","ENSMUSG00000031453"
"1525","","",,,"Pik3c2b","false","false","Cluster 2","Clustered","9.545454545454547","0","ENSMUSG00000026447"
"1523","","",,,"Fcamr","false","false","Cluster 2","Clustered","8.50909090909091","0","ENSMUSG00000026415"
"1522","","",,,"C4bp","false","false","Cluster 2","Clustered","8.50909090909091","0","ENSMUSG00000026405"
"492","","",,,"Dkk3","false","false","Cluster 2","Clustered","8.761904761904763","0","ENSMUSG00000030772"
"491","","",,,"Slc5a11","false","false","Cluster 2","Clustered","9.010989010989011","0","ENSMUSG00000030769"
"1513","","",,,"2810459M11Rik","false","false","Cluster 2","Clustered","9.533333333333333","0","ENSMUSG00000026227"
"1512","","",,,"Itm2c","false","false","Cluster 2","Clustered","8.454545454545455","0","ENSMUSG00000026223"
"1508","","",,,"Cyp27a1","false","false","Cluster 2","Clustered","8.50909090909091","0","ENSMUSG00000026170"
"484","","",,,"Pianp","false","false","Cluster 2","Clustered","9.230769230769232","0","ENSMUSG00000030329"
"1505","ARCHS4 Coexpression,270;Enrichr Queries,198;GTEx Coexpression,570","IL1RN,ANKLE1,CHPF,IRS1,PLAT,RORA,PLOD2,CWH43,CELSR1,MKI67,AQP3,SLC4A4,CLU,CLDN1,SOGA1,IFIT3,ICAM1,MYLK,TGM1,RGS4,LGALS3,FAM162A,PLAU,CHEK2,FAM3B,CAPN2,CYP1B1,SOX9,TGM2,IER3,EPHA4,KRT4,IGFBP5,LIMCH1,IL1R1,DAPK1,FST,SPNS2,WNT5A,KCTD1,AFAP1,OVOL2,CACNB3,DOK3,COL4A2,COL4A1,MALL,LY6D,MAL,MXRA7,EPHA1,PLPP3,STX1A,CDS1,IGSF3,EPAS1,ITPR1,CACNA1A,LPL,LPAR3,NREP,PLA2G5,NDRG1,FUT1,RASGRP3,SLC9A3R2,LDHB,CYB5R3,STC2,PDGFC,IGFBP7,S100A14,ST3GAL1,PPARGC1A,RAB11FIP5,GSTM4,PRNP,JUN,TGFB2,FAM78A,PLK2,TRPV2,FN1,CRIM1,RAB27B,PTK6,NR1D1,FBXO32,FOSL1,ARHGAP32,CXCL10,BMP2,RAET1E,NR4A3,NCEH1,DLG3,MYO5B,BHLHE40,ID4,SPATS2L,MAFK,ITM2C,ECM1,BTG2,CCDC120,PTPRM,LAMC2,ADM,SLC7A11,PRSS22,RCSD1,SYNE1,LIMD2,SH3PXD2A,IMPA2,TIMP3,FFAR1,CERS3,CD53,FGFBP1,EDN1,CLUH,ANXA1,MME,ITGA2,MYOF,TBC1D8,PLAUR,TMEM40,SLC39A14,ETV5,CKAP4,ARL4C,ALDH1A3,BACE2,PTP4A3,INF2,OAF,PXDN,COL6A1,KCNMA1,CDH13,DSG3,ITGA5,KIFC3,PLCB1,MGLL,SDCCAG8,LAMA5,SEC23A,HLF,SEMA3C,AMIGO2,FAM129A,ATP1A1,PTGS2,BARX2,THBS1,AURKB,FAM129B,RASD2,SCEL,CAMK2N1,GNA11,GPC1,MAL2,HES2,GPR157,MPZL2,EGLN3,SLC12A4,CMTM3,MOCOS,AHNAK2,GRHL3,SORBS2,SEMA4G,FMO4,OTOP3,PTPN14,DHRS3,SULF2,FMNL3,TTC9,FMNL2,PCDHB16,NECTIN4,PFKP,SPC24","278","346.0","Npas2","false","false","Cluster 2","Clustered","10.105263157894736","0","ENSMUSG00000026077"
"479","","",,,"Gxylt2","false","false","Cluster 2","Clustered","8.672727272727272","0","ENSMUSG00000030074"
"476","","",,,"Slc23a4","false","false","Cluster 2","Clustered","8.416666666666666","0","ENSMUSG00000029847"
"475","","",,,"Igf2bp3","false","false","Cluster 2","Clustered","9.070175438596491","0","ENSMUSG00000029814"
"474","","",,,"Ahcyl2","false","false","Cluster 2","Clustered","9.220588235294118","0","ENSMUSG00000029772"
"473","","",,,"Ccdc136","false","false","Cluster 2","Clustered","8.8","0","ENSMUSG00000029769"
"1496","","",,,"Slco3a1","false","false","Cluster 2","Clustered","9.696969696969697","0","ENSMUSG00000025790"
"471","","",,,"Limk1","false","false","Cluster 2","Clustered","8.5","0","ENSMUSG00000029674"
"1494","","",,,"Plk4","false","false","Cluster 2","Clustered","8.416666666666666","0","ENSMUSG00000025758"
"468","","",,,"Snx8","false","false","Cluster 2","Clustered","9.070175438596491","0","ENSMUSG00000029560"
"466","","",,,"Anxa3","false","false","Cluster 2","Clustered","8.454545454545455","0","ENSMUSG00000029484"
"1489","","",,,"Podxl","false","false","Cluster 2","Clustered","9.12087912087912","0","ENSMUSG00000025608"
"465","","",,,"Cds1","false","false","Cluster 2","Clustered","9.463235294117649","0","ENSMUSG00000029330"
"464","ARCHS4 Coexpression,219;GTEx Coexpression,202","ARHGAP11A,HMGB2,HJURP,BUB1B,KIF11,ENO1,MKI67,FOXM1,SMC4,LMNB1,SMC2,KIF15,TUBA1B,MIS18BP1,NUSAP1,PBK,NEK2,TK1,SKP2,NDC1,TEAD4,HELLS,RMI2,GAS2L3,CKAP2L,PGAM1,MASTL,CDC25C,KNSTRN,CCNA2,ASPM,DEPDC1B,NEIL3,MELK,ESPL1,CKS2,BIRC5,DNA2,KIF20B,GAPDH,DTL,PRR11,ASF1B,PIF1,PARPBP,CDCA2,PKN3,TROAP,ARHGAP19,NCAPG,TTK,HMMR,AURKB,AURKA,HSPD1,CCNB2,LDHA,CCNB1,RACGAP1,POLD1,PGK1,RAD54L,IGF2BP3,FAM83D,BUB1,E2F8,PLK4,CENPU,CCDC18,PLK1,HMGA1,TICRR,TPX2,CENPF,CDK1,CENPM,NCAPD2,SPC24,MAD2L1,CDKN3,PHF19","112","210.5","Cenpa","false","false","Cluster 2","Clustered","9.202614379084968","0","ENSMUSG00000029177"
"462","","",,,"Cgref1","false","false","Cluster 2","Clustered","8.672727272727272","0","ENSMUSG00000029161"
"456","","",,,"Espn","false","false","Cluster 2","Clustered","8.583333333333332","0","ENSMUSG00000028943"
"1475","","",,,"Itga7","false","false","Cluster 2","Clustered","9.102564102564102","0","ENSMUSG00000025348"
"1474","","",,,"Dnase1l3","false","false","Cluster 2","Clustered","8.672727272727272","0","ENSMUSG00000025279"
"1471","","",,,"Scd2","false","false","Cluster 2","Clustered","8.812865497076023","0","ENSMUSG00000025203"
"446","ARCHS4 Coexpression,373;Enrichr Queries,405;GTEx Coexpression,507","IL1RN,CD83,NRROS,ANKRD35,CSF1,MAML2,NAB2,LDLRAD3,SDR9C7,RORA,CWH43,CELSR1,ABCA12,IFI30,CLDN1,ETS1,TNF,SLC8A1,ICAM1,ZC3H12D,BASP1,FCGRT,RPS6KA2,SLCO2B1,RASSF5,SCMH1,LIPK,KIF21B,EPHB3,TGM2,IER3,SEMA6B,EPHA4,ARID5A,PRKCA,FRMD4A,COL4A2,BIN1,SLC9A9,RIN3,KCTD12,TNIK,PLPP3,MACF1,PFKFB3,EPAS1,NXPH4,INSIG1,ITPR1,PLA2G3,IL20RB,CACNA1A,ITPR2,CACNA1C,NDRG1,KLC3,ADGRG1,RDH12,KCNN4,ST3GAL1,RREB1,FAM83B,WNT3,SPTBN2,PRNP,JUN,CARMIL2,CARMIL3,PLK2,HPS4,FN1,CRIM1,IFFO2,NFATC2,ACER1,SDK1,PTPRE,CXCL10,EFNA3,NR4A3,GJB4,LYPD6B,BHLHE40,SP6,RGL1,ITM2C,LGMN,BTG2,DOCK4,CCDC120,ITGAM,TENM4,SLC35F2,CELF2,PLEK,SLC2A1,DMKN,SLC2A5,NKPD1,SYNE1,CASP14,DUSP10,SH3PXD2A,TIMP2,FFAR4,ABCD1,CERS3,CD53,TRIM62,CAMK1D,TNFRSF18,PLEKHG5,TNFRSF19,MYOF,PLAUR,SERPINB5,ETV5,PALD1,ARL4C,TGFBR3,APBB1IP,FAM234B,PTP4A3,SETBP1,GFOD1,RASA3,CDHR1,PXDN,KCNMA1,PLEKHO1,PLEKHO2,SHANK2,MGLL,TLR2,C1QA,TUFT1,SLC43A3,RGS16,FAM129A,ALOX12B,PTGS2,THBS1,AURKB,STX11,ABLIM1,RNF39,SPTSSB,FYN,ALOXE3,MARCKSL1,GSN,LIMK1,SORBS2,KRT10,LHFPL2,SGPP2,SORL1,DHRS3,SULF2,FMNL3,KLF7,SPSB1,FMNL2,P2RX4,SLCO3A1,COL7A1,KIF26B,TNIP3,TRIM35,NECTIN4,CD68","414","428.3","Hivep3","false","false","Cluster 2","Clustered","9.545454545454547","0","ENSMUSG00000028634"
"445","","",,,"Tnfrsf8","false","false","Cluster 2","Clustered","8.583333333333332","0","ENSMUSG00000028602"
"444","","",,,"Ift74","false","false","Cluster 2","Clustered","9.12087912087912","0","ENSMUSG00000028576"
"1466","","",,,"Slc16a3","false","false","Cluster 2","Clustered","8.454545454545455","0","ENSMUSG00000025161"
"442","","",,,"Slc6a9","false","false","Cluster 2","Clustered","9.058823529411764","0","ENSMUSG00000028542"
"1465","","",,,"Arhgap19","false","false","Cluster 2","Clustered","8.454545454545455","0","ENSMUSG00000025154"
"441","","",,,"Plpp3","false","false","Cluster 2","Clustered","9.230769230769232","0","ENSMUSG00000028517"
"436","ARCHS4 Coexpression,569;Enrichr Queries,510;GTEx Coexpression,740","FCGBP,ANKRD37,IL1RN,CD83,NRROS,CSF1,PLAT,RORA,IFI30,ETS1,CLU,TNF,IFIT3,TMEM143,ICAM1,ZC3H12D,LGALS3,GJA1,CHCHD3,PLAU,BASP1,FCGRT,SLCO2B1,GJA4,NAMPT,LONP1,SLC16A6,DPF3,CYP1B1,SOX9,TGM2,IER3,RSAD2,IGFBP5,IL1R1,CACNA2D1,FST,ARID5A,MYO7A,SYTL3,MYL7,BIN1,RIN3,PLPP3,PFKFB3,EPAS1,INSIG1,CREM,LPL,SLCO5A1,COX7A1,NDRG1,ADAMTS15,SCIN,HMOX1,HIVEP3,SNX9,PPARGC1A,SLC19A2,JUN,TGFB2,TIPARP,BDNF,GFPT2,PLK2,FN1,SLC16A10,GPR137B,GADD45G,FOSL1,ISG20,CXCL10,PTPRE,BMP2,BHLHE40,NABP1,MAFK,PAM,CLIC5,BTG2,DOCK4,FHL1,PLEK,SLC2A1,PRKAG2,LDB3,ADM,CXCL1,SLC7A11,SLC2A5,KBTBD13,GYS1,DUSP10,STBD1,ANKRD1,TIMP3,LMCD1,EDN1,DUSP3,ANXA1,TNFRSF12A,PLAUR,TBC1D8,PALD1,ARL4C,ACTA2,TGFBR3,APBB1IP,FAM210A,PTP4A3,RILPL1,IRF1,PXDN,KIT,ADSSL1,NDUFS2,TLR2,C1QA,PRKAA2,SMPX,RGS16,FGL2,FAM129A,CXCR4,SRL,PTGS2,THBS1,STX11,AURKB,RASD1,SH3BGR,AAMDC,EGLN3,GPR4,LHFPL2,MERTK,FMNL3,P2RX4,NT5C1A,TNIP3,FOSB,CD68","663","606.3","Nr4a3","false","false","Cluster 2","Clustered","10.079710144927537","0","ENSMUSG00000028341"
"1457","","",,,"Habp2","false","false","Cluster 2","Clustered","8.791208791208792","0","ENSMUSG00000025075"
"432","","",,,"Trp53inp1","false","false","Cluster 2","Clustered","9.75438596491228","0","ENSMUSG00000028211"
"431","","",,,"Uox","false","false","Cluster 2","Clustered","9.625","0","ENSMUSG00000028186"
"430","","",,,"Tlr2","false","false","Cluster 2","Clustered","10.352941176470589","0","ENSMUSG00000027995"
"1454","","",,,"Rbp4","false","false","Cluster 2","Clustered","8.672727272727272","0","ENSMUSG00000024990"
"429","","",,,"Efna1","false","false","Cluster 2","Clustered","8.986928104575163","0","ENSMUSG00000027954"
"1453","","",,,"Acsl5","false","false","Cluster 2","Clustered","8.666666666666668","0","ENSMUSG00000024981"
"427","","",,,"Npr1","false","false","Cluster 2","Clustered","8.454545454545455","0","ENSMUSG00000027931"
"426","","",,,"S100a11","false","false","Cluster 2","Clustered","8.836363636363636","0","ENSMUSG00000027907"
"425","","",,,"Gstm4","false","false","Cluster 2","Clustered","9.625","0","ENSMUSG00000027890"
"424","","",,,"Gpsm2","false","false","Cluster 2","Clustered","9.487179487179487","0","ENSMUSG00000027883"
"1446","","",,,"Cst6","false","false","Cluster 2","Clustered","8.454545454545455","0","ENSMUSG00000024846"
"422","","",,,"Postn","false","false","Cluster 2","Clustered","8.571428571428571","0","ENSMUSG00000027750"
"421","","",,,"Ufm1","false","false","Cluster 2","Clustered","9.663157894736841","0","ENSMUSG00000027746"
"1443","","",,,"Ankrd1","false","false","Cluster 2","Clustered","9.808333333333334","0","ENSMUSG00000024803"
"1442","","",,,"Ankrd22","false","false","Cluster 2","Clustered","9.441666666666666","0","ENSMUSG00000024774"
"416","","",,,"Snx16","false","false","Cluster 2","Clustered","10.274509803921568","0","ENSMUSG00000027534"
"415","","",,,"Zbp1","false","false","Cluster 2","Clustered","9.35","0","ENSMUSG00000027514"
"1438","","",,,"Fads2","false","false","Cluster 2","Clustered","9.058823529411764","0","ENSMUSG00000024665"
"1436","","",,,"Isoc1","false","false","Cluster 2","Clustered","8.857142857142858","0","ENSMUSG00000024601"
"410","","",,,"Bmp2","false","false","Cluster 2","Clustered","9.35897435897436","0","ENSMUSG00000027358"
"1433","","",,,"Impa2","false","false","Cluster 2","Clustered","10.153846153846155","0","ENSMUSG00000024525"
"409","","",,,"Smox","false","false","Cluster 2","Clustered","9.847619047619048","0","ENSMUSG00000027333"
"407","","",,,"Chac1","false","false","Cluster 2","Clustered","9.533333333333333","0","ENSMUSG00000027313"
"404","","",,,"Dnajc10","false","false","Cluster 2","Clustered","8.5","0","ENSMUSG00000027006"
"400","","",,,"Egfl7","false","false","Cluster 2","Clustered","8.68421052631579","0","ENSMUSG00000026921"
"399","","",,,"Stom","false","false","Cluster 2","Clustered","8.666666666666668","0","ENSMUSG00000026880"
"398","","",,,"Gsn","false","false","Cluster 2","Clustered","10.395604395604396","0","ENSMUSG00000026879"
"1422","","",,,"Slc23a1","false","false","Cluster 2","Clustered","9.545454545454547","0","ENSMUSG00000024354"
"396","","",,,"Abi2","false","false","Cluster 2","Clustered","8.5","0","ENSMUSG00000026782"
"395","","",,,"Pter","false","false","Cluster 2","Clustered","8.672727272727272","0","ENSMUSG00000026730"
"394","","",,,"Cfap126","false","false","Cluster 2","Clustered","9.485714285714286","0","ENSMUSG00000026649"
"393","","",,,"Cenpf","false","false","Cluster 2","Clustered","8.666666666666668","0","ENSMUSG00000026605"
"392","","",,,"Ptpn14","false","false","Cluster 2","Clustered","9.230769230769232","0","ENSMUSG00000026604"
"1414","","",,,"Prss30","false","false","Cluster 2","Clustered","8.761904761904763","0","ENSMUSG00000024124"
"390","","",,,"Pycr2","false","false","Cluster 2","Clustered","9.545454545454547","0","ENSMUSG00000026520"
"389","","",,,"Capn2","false","false","Cluster 2","Clustered","8.857142857142858","0","ENSMUSG00000026509"
"1412","","",,,"Xdh","false","false","Cluster 2","Clustered","9.716666666666667","0","ENSMUSG00000024066"
"1406","","",,,"Fgd2","false","false","Cluster 2","Clustered","8.590909090909092","0","ENSMUSG00000024013"
"380","","",,,"Nabp1","false","false","Cluster 2","Clustered","10.035087719298247","0","ENSMUSG00000026107"
"379","","",,,"Gls","false","false","Cluster 2","Clustered","9.230769230769232","0","ENSMUSG00000026103"
"377","","",,,"Il1r1","false","false","Cluster 2","Clustered","10.058823529411764","0","ENSMUSG00000026072"
"374","ARCHS4 Coexpression,161;Enrichr Queries,664;GTEx Coexpression,216","SPARC,MAML2,IRS1,NAB2,CBLB,RORA,NR3C1,CELSR1,ETS1,GIMAP8,ELK3,ICAM1,GJA1,CDH2,FAM162A,BASP1,DPYSL5,KIF5C,GJA4,DPYSL3,LONP1,CAPN2,KIF21A,KIF21B,SBF2,TGM2,IER3,EPHA5,EPHA4,CD93,IGFBP5,CSGALNACT2,F2R,AFAP1,FRMD4A,HSPG2,MYT1,MID1,TANC2,ZC2HC1A,COL4A2,COL4A1,MAP1B,S100A6,SERPING1,KCTD12,PLPP3,PHLDB2,PFN2,PFKFB3,EPAS1,MAGED1,ITPR1,NREP,NDRG1,PHF21B,CALHM2,PCBP4,MAP2,TSPAN4,HMOX1,MAP6,KIF3C,CYC1,ST3GAL1,SCN3A,PLXNA4,PRNP,CRTAP,JUN,TGFB2,TCAF1,FZD3,ATP8B2,CAV2,PLK2,CRIM1,FN1,MSN,DCLK2,BMP6,REEP1,EHD2,CCDC88A,NBEA,PQLC3,PKIA,BHLHE40,NABP1,AMOTL2,ESAM,SERINC1,FAT4,XKR4,FERMT2,ITM2C,BTG2,WDR47,TENM4,CELF2,CELF3,SLC2A1,PTPRM,ADM,SLC7A11,PEAR1,SYNE3,BICD1,TTC28,SYNE1,ROBO1,TUBA1A,DUSP10,SH3PXD2A,DSE,GDAP1L1,TIMP2,TIMP3,CEP170,TK1,SLC37A3,EDN1,KLF12,ANXA1,ACTL6B,IFNGR1,SGIP1,ANXA5,PLAUR,ANO6,FAM219A,MANEAL,TMEM173,SIRT3,PARD3B,TGFBR3,ARL4C,PTP4A3,TUBB2A,RASA3,IRF1,PXDN,PLSCR4,DPYD,CDC42EP3,RBMS1,CD302,ITGA5,MAPT,VGLL3,RBMS3,SEMA3C,LAMA4,FAXC,ATL1,FAM129A,CXCR4,CRMP1,PTGS2,THBS1,AURKB,HSPD1,GNG2,STOM,GPC2,FYN,PAK3,CCDC184,REM2,RUNX1T1,SLC12A4,GSN,PTGES2,MBOAT2,NMNAT2,MEIS2,EFR3B,OTOP3,OSTM1,SLCO3A1,ABI2,SYT11,STK17B,ASXL3,NOVA2,MSRB3,TRIM36,CDK5R1","280","347.0","Klf7","false","false","Cluster 2","Clustered","10.266666666666667","0","ENSMUSG00000025959"
"373","","",,,"Rdh10","false","false","Cluster 2","Clustered","8.454545454545455","0","ENSMUSG00000025921"
"372","","",,,"Kbtbd3","false","false","Cluster 2","Clustered","8.454545454545455","0","ENSMUSG00000025893"
"370","","",,,"Itih5","false","false","Cluster 2","Clustered","9.202614379084968","0","ENSMUSG00000025780"
"1394","","",,,"Sult1c2","false","false","Cluster 2","Clustered","8.50909090909091","0","ENSMUSG00000023122"
"2415","","",,,"D2Bwg1423e","false","false","Cluster 2","Clustered","8.952380952380953","0","ENSMUSG00000109946"
"1389","","",,,"Krt18","false","false","Cluster 2","Clustered","8.761904761904763","0","ENSMUSG00000023043"
"2412","","",,,"Gm28053","false","false","Cluster 2","Clustered","9.0","0","ENSMUSG00000098715"
"1387","","",,,"Fam3b","false","false","Cluster 2","Clustered","8.761904761904763","0","ENSMUSG00000022938"
"1386","","",,,"Ildr1","false","false","Cluster 2","Clustered","9.545454545454547","0","ENSMUSG00000022900"
"362","","",,,"Inpp5a","false","false","Cluster 2","Clustered","8.857142857142858","0","ENSMUSG00000025477"
"356","","",,,"Hoga1","false","false","Cluster 2","Clustered","8.5","0","ENSMUSG00000025176"
"1379","","",,,"Gbe1","false","false","Cluster 2","Clustered","8.857142857142858","0","ENSMUSG00000022707"
"354","","",,,"Maoa","false","false","Cluster 2","Clustered","9.12087912087912","0","ENSMUSG00000025037"
"352","ARCHS4 Coexpression,405;ENCODE ChIP-seq,38;Enrichr Queries,393;ReMap ChIP-seq,182;GTEx Coexpression,276","MDC1,ANKLE1,STMN3,TESK2,ENO1,FGFRL1,MYLK,CREB3L4,DPYSL3,NAMPT,AP1S2,PIP4K2A,WLS,IER3,GAMT,HES7,TSPYL2,GABARAPL1,DHDH,BHLHA15,HDHD3,CLDN6,GPR162,EML6,WDR81,CLDN9,TEP1,JTB,MYL9,ASF1B,ABCB6,NCAPG,LDHA,CRACR2B,SLC19A3,HMOX1,PRELID2,JUN,WNT10A,TIPARP,PLK1,FN1,ABCA7,NR1D1,L1CAM,FOSL1,EHD2,WDR5B,MRVI1,FERMT2,ARHGAP9,BTG2,TGFB1I1,PHF1,GPT,ADM,TFCP2L1,SLC6A4,CSRP2,TUBA1A,AIFM1,TIMP2,TCP11L2,TIMP3,EDARADD,RMI2,TPI1,ACTL6B,ANXA3,ITPK1,ROM1,ANXA5,COPZ2,TMC8,ELOVL6,MMP11,PLCB3,GPRC5B,TUBB2A,HEATR5A,KCNMA1,PXDN,PTRH1,PAFAH1B3,VAMP2,MGLL,RAPGEF4,ECHS1,PLPPR2,PRUNE2,FAM129A,SNX33,FAM129B,FAM117A,FLNA,ANO10,CKB,TAF9B,P4HTM,CDKN2D,EGLN1,EGLN3,GSN,ANKIB1,PKLR,MDH2,RFLNB,WWP1,TMCO4,DHRS3,STXBP5L,TTLL7,SPSB2,DHRS7,SPSB1,TMEM56,SARM1,MSRB3,FOSB,YPEL3,HSPA1B,NUCB2,ANKRD13D,CHPF,CHRM4,RAB3D,NAB2,PLOD2,RORA,FRY,CLU,HID1,EFEMP2,HPGDS,FCGRT,SESN1,LAMP2,NEK1,PIM2,PLXNC1,SLC16A3,SH2D5,FADS1,BNIP3L,RAB2B,PCYT2,DGAT1,IGFBP5,MAGI2,DIO1,NEAT1,FBXO10,FAM227A,SLC9B2,DISP2,CLIP3,ACAP3,RAB36,DMWD,S100A6,SQSTM1,SLC27A5,OSBP2,PFKFB3,ZC4H2,RNF180,INSIG1,ITPR1,ABHD8,FBXO48,GMPR,AK4,HMMR,TNFRSF11A,ACAT2,GLIS2,SLC9A3R2,NACC2,PMVK,PGK1,TNFRSF14,RAB6B,TMEM120B,SDF2L1,OSBPL6,RBPMS,HPS4,FBXO32,IRAK1BP1,BFSP1,PTPRC,P4HA1,P4HA2,REEP2,NFE2L3,CSPG5,MAFK,REEP6,CNIH2,PLEKHM3,KCNK6,RNF11,CDCA7L,APIP,ARRB1,SYNE2,WDR6,BCAS1,CHPF2,TRPC1,LIX1L,FAM219A,VPS37B,KCNAB3,SPTB,ARL4C,PTP4A3,PKM,TFDP2,CCDC74A,ITGA7,GAPDH,ST6GALNAC4,ST6GALNAC6,PLEKHH2,ACSS2,LRP1,CCDC69,TTK,SELENBP1,CECR2,ABLIM1,TRIM47,IGF2BP3,MROH6,ALOXE3,STOX1,JAZF1,MARCKSL1,LINGO3,SMOX,PLCL1,MBOAT2,FBXL16,EFR3B,SORL1,KBTBD11,MYO1D,DNAJA4,SYT11,SERHL,SPAG1,PFKP,SPARC,FAM89B,DIXDC1,GCC1,IFI30,ZDHHC2,CISD3,ICAM1,LGALS3,C1GALT1C1,LONP1,DAG1,SOX9,EPHA7,PAQR7,PAQR4,KCNK10,P3H1,MFSD11,GCAT,ASRGL1,MTURN,KATNAL1,CYP2U1,MALL,KCNQ4,RIN3,VDAC1,MXRA7,KDELR3,PLPP3,KIF20B,CTXN1,TRIM11,STX1A,NUMBL,RWDD2A,EPB42,EPAS1,STXBP1,SMIM1,C2CD4C,MAATS1,INPP5A,PCBP4,STC2,TSPAN6,SLAMF9,TSPAN4,TSPAN2,B4GALNT1,SNX9,CDR2,BBS1,TRAP1,TMEM86A,CARMIL3,PTPRN2,TNFSF15,PYCR1,RAB27A,NBEAL2,GADD45G,NET1,CCDC88A,COL9A3,KYAT1,ITM2C,TMEM151B,ACY1,GBE1,PTPRH,CLYBL,KHK,HERPUD1,RAC3,IDS,DLAT,ACADS,ZCCHC24,PSD,PCYT1B,ATP6V0B,TMEM150A,MRPS27,PRMT2,TNFRSF12A,ANO8,GPBAR1,KIF24,TUBG2,RENBP,UGDH,DEPDC7,ALDOC,TLR6,MAPT,ALDOA,PDZRN3,DBN1,CD63,NAPB,TAGLN,CXCR4,CRIP2,CRIP1,NKD1,CAMK2N1,TCEAL1,RAD54L,GABRD,EMC9,GDF11,PTGES2,KBTBD3,ALDH4A1,HIST3H2A,XK,FKBP1B,APBA1,B9D1,ESYT1,CD68,FOXA3,CDK5R1,MEGF9,ACAA2,NDUFA10,NRM,OGDHL,JADE2,NR3C1,CELSR1,ETS1,CELSR3,TMEM143,CHCHD3,FAM162A,KIF5C,CCRL2,COTL1,DENND5A,SBF2,RGS9,TGM2,CHRNB1,TMOD2,APLP1,TTC7B,SDHC,SDHA,RUNDC3A,TANC2,PLA2G15,SELENOM,DOK3,SHPK,SELENOP,TBC1D24,NUPR1,SCG2,RTN2,RASL12,NDRG4,ARHGEF25,NDRG2,NDRG1,NID2,COX7A1,CACNA1H,DPP7,CALD1,ALDH3B1,UAP1L1,CYC1,ANKZF1,COX10,SYT5,FDPS,PRNP,ACBD4,HMGA1,KLHL23,COQ9,ACSF2,EFNA1,UEVLD,QDPR,GNAO1,EFNA3,ATG16L2,DLG4,CCPG1,BAMBI,PQLC3,BHLHE40,EBPL,PHF19,MXD4,LRP11,ABCD4,TTC26,ACADVL,THRA,SLC2A1,HSPB1,YBX2,SLC2A4,SOBP,PKD1,RND1,TMEM220,FLCN,DBP,ALDH2,NAPRT,HIST1H1C,SUN2,ATP6AP1,LMNTD2,H2AFV,MASTL,GPCPD1,ETV4,LSS,TAPBP,ACTA2,VGF,DDAH2,IRF1,CAT,NDUFS2,PDE5A,HEMGN,LAMA5,KDM3A,HLF,RGS14,RSPH9,ADD3,THBS1,USP18,AURKB,AURKA,DLL4,GNA11,NT5DC3,MXI1,POLD2,STOM,FAHD1,CMTM3,SGTB,BNIP3,ARID3A,MEIS2,MAPK12,MAPK11,UFM1,FAM167A,PIK3IP1,FAM131A,CFAP36,CHPT1","175","258.8","Mxi1","false","false","Cluster 2","Clustered","10.399999999999999","0","ENSMUSG00000025025"
"1376","","",,,"Rabl2","false","false","Cluster 2","Clustered","8.583333333333332","0","ENSMUSG00000022621"
"2398","","",,,"Ces2h","false","false","Cluster 2","Clustered","8.50909090909091","0","ENSMUSG00000091813"
"2396","","",,,"D6Ertd527e","false","false","Cluster 2","Clustered","8.672727272727272","0","ENSMUSG00000090891"
"345","","",,,"Asah2","false","false","Cluster 2","Clustered","8.901098901098901","0","ENSMUSG00000024887"
"342","","",,,"Syt7","false","false","Cluster 2","Clustered","9.952380952380953","0","ENSMUSG00000024743"
"2384","","",,,"Gm7325","false","false","Cluster 2","Clustered","9.625","0","ENSMUSG00000079471"
"334","","",,,"Slc14a2","false","false","Cluster 2","Clustered","9.340659340659341","0","ENSMUSG00000024552"
"2381","","",,,"Cyp4v3","false","false","Cluster 2","Clustered","9.010989010989011","0","ENSMUSG00000079057"
"332","","",,,"Sec11c","false","false","Cluster 2","Clustered","9.808333333333334","0","ENSMUSG00000024516"
"330","","",,,"Stard4","false","false","Cluster 2","Clustered","9.463235294117649","0","ENSMUSG00000024378"
"1353","","",,,"Slc7a8","false","false","Cluster 2","Clustered","9.35897435897436","0","ENSMUSG00000022180"
"328","","",,,"Tmem173","false","false","Cluster 2","Clustered","8.666666666666668","0","ENSMUSG00000024349"
"326","","",,,"Bambi","false","false","Cluster 2","Clustered","8.952380952380953","0","ENSMUSG00000024232"
"2373","","",,,"Bnip3","false","false","Cluster 2","Clustered","9.340659340659341","0","ENSMUSG00000078566"
"325","ARCHS4 Coexpression,1006;GTEx Coexpression,1280","MDC1,AKNA,YBX2,SPATA6,LIMD2,FGD3,FAM102A,ADGRE5,SPOCK2,TNFRSF14,KIF21B,IFT57,RAB11FIP5,GSTM3,SUN2,SMCP,MYH7B,CARMIL2,IZUMO4,LMNTD2,TMC8,NBEAL2,ABCA7,IQCD,COX6B2,SYNGR4,SORBS3,TERB1,CCDC88B,ZC2HC1C,MEX3B,RASA3,CCDC74A,ASXL3,MAP7D1,ZPBP2,FAM187B,CFAP36,RIN3,ADAM8,EVL,YPEL3,CARD11","1335","1143.0","Phf1","false","false","Cluster 2","Clustered","8.857142857142858","0","ENSMUSG00000024193"
"2372","","",,,"Ddi2","false","false","Cluster 2","Clustered","8.901098901098901","0","ENSMUSG00000078515"
"1346","","",,,"Amer2","false","false","Cluster 2","Clustered","9.0","0","ENSMUSG00000021986"
"321","","",,,"Crim1","false","false","Cluster 2","Clustered","8.50909090909091","0","ENSMUSG00000024074"
"1341","","",,,"Samd4","false","false","Cluster 2","Clustered","8.454545454545455","0","ENSMUSG00000021838"
"2365","","",,,"Selenom","false","false","Cluster 2","Clustered","8.5","0","ENSMUSG00000075702"
"2362","ARCHS4 Coexpression,142;Enrichr Queries,174;GTEx Coexpression,445","IFITM1,GLDC,CWH43,ABCA12,CLDN1,GJA1,NIPAL2,MYB,CYP1B1,LIPK,SOX9,EPHB3,IER3,EPHA4,PAQR9,SERPINF2,RNASE4,ACSL3,OVOL2,POR,SOAT2,LGALS12,PTGES,NRN1,EPAS1,CFI,IL20RB,APCDD1,RDH12,STC2,NGFR,TMEM86A,JUN,GSDMA,FZD7,TREX2,IGF2,FZD9,IFFO2,PYCR1,NR1D1,SMARCA1,GADD45G,ACER1,GJB1,GJB4,LYPD6B,ID4,COL9A3,ITM2C,COL18A1,BTG2,CCDC120,KRT23,LRRC3,PCSK9,ADM,WFDC2,CASP14,CTSK,HNF4A,NEFL,KIF1A,TEAD4,EDN1,TNFRSF12A,ELOVL2,GFRA1,PAX6,PROX1,F2,SLC39A14,SERPINB5,NR5A2,MMP15,PXDN,KIT,PDZRN3,CXCR4,ALOX12B,VWCE,AFP,NKD1,RASSF10,SLC17A9,CAMK2N1,SPTSSB,MSX1,CKB,EGLN3,KRT10,FMO4,FMO5,AGT,AGMAT,FABP1,ALDH4A1,CENPF,COL3A1,CYP2W1,KRT18,KIF26B,PCDHB16,LGR5,CRLF1,FOXA3,FOXA1,KLB,SCARB1,ANKRD35,CHPF,RORA,SDR9C7,CELSR1,ESPN,CLU,EFEMP1,DACH1,CHCHD3,SLC16A3,FADS1,ABCG5,SEMA6A,PCYT2,G6PC,IGFBP5,FST,WNT5A,IGFBP2,PIPOX,SHISA2,HIC2,MYCN,SMO,SHPK,SELENOP,SLC27A2,AJUBA,CUL7,PLCXD1,KLC3,TKFC,ADGRG6,VARS2,WNT3,HMGA2,EVX1,INHBB,SYT8,MLXIPL,CXCL10,EFNA3,BMP2,BAMBI,LHX1,BHLHE40,SP6,FGFR4,MOXD1,SLC2A1,DMKN,NKPD1,CERS3,PEG3,TNFRSF19,REXO2,ETV4,PRODH2,ETV5,ADRA2A,NIPSNAP1,SSTR5,ARL4C,ACTA2,PTP4A3,CDHR1,SLC25A13,SEC23A,HLF,TUFT1,LAMA3,LEF1,THBS1,AURKB,HSPD1,RNF39,LRIG3,SLIT2,IGF2BP2,ALOXE3,PLA2G2F,SLC12A4,IRX4,AHNAK2,ARID3A,SEMA4G,MEIS2,FRAS1,COL7A1,TRIM35,INSM1,PABPC1L,NECTIN4,SNTB1","168","253.7","Sp5","false","false","Cluster 2","Clustered","9.314285714285715","0","ENSMUSG00000075304"
"1333","","",,,"Pde8b","false","false","Cluster 2","Clustered","9.0","0","ENSMUSG00000021684"
"2355","","",,,"Slc4a11","false","false","Cluster 2","Clustered","8.590909090909092","0","ENSMUSG00000074796"
"307","","",,,"Slc4a8","false","false","Cluster 2","Clustered","9.382352941176471","0","ENSMUSG00000023032"
"2354","","",,,"Ccl28","false","false","Cluster 2","Clustered","9.34640522875817","0","ENSMUSG00000074715"
"306","","",,,"Asic1","false","false","Cluster 2","Clustered","9.536842105263158","0","ENSMUSG00000023017"
"1328","","",,,"Dapk1","false","false","Cluster 2","Clustered","9.230769230769232","0","ENSMUSG00000021559"
"304","","",,,"Fmnl3","false","false","Cluster 2","Clustered","9.102564102564102","0","ENSMUSG00000023008"
"302","","",,,"Enah","false","false","Cluster 2","Clustered","9.27450980392157","0","ENSMUSG00000022995"
"1325","","",,,"Gadd45g","false","false","Cluster 2","Clustered","10.456140350877194","0","ENSMUSG00000021453"
"301","","",,,"Cbr3","false","false","Cluster 2","Clustered","8.666666666666668","0","ENSMUSG00000022947"
"1324","","",,,"Elovl2","false","false","Cluster 2","Clustered","8.672727272727272","0","ENSMUSG00000021364"
"299","","",,,"D16Ertd472e","false","false","Cluster 2","Clustered","10.035087719298247","0","ENSMUSG00000022864"
"297","","",,,"Mylk","false","false","Cluster 2","Clustered","8.836363636363636","0","ENSMUSG00000022836"
"2344","","",,,"Cox7a1","false","false","Cluster 2","Clustered","9.35897435897436","0","ENSMUSG00000074218"
"1320","ARCHS4 Coexpression,393;Enrichr Queries,93;GTEx Coexpression,465","RORA,FRY,CELSR1,ETS1,SLC4A4,SLC8A1,MYLK3,TMEM143,MYLK,CHCHD3,DPYSL3,TMEM38A,PLXNC1,SOX9,NCKAP5,SCN1B,EPM2A,SEMA6C,EPHA4,SEMA6A,ADPRHL1,IGFBP5,LIMCH1,SEMA6D,CACNA2D1,WNT5A,SHISA4,PRKCA,FRMD4A,SDHA,SDHB,CACNB1,OBSCN,COL4A2,PPP1R3C,BIN1,COL4A1,RRAGD,LGALS12,VDAC1,UQCRC2,KCTD12,TNIK,PLPP3,PHLDB2,RTN2,PFKFB1,KHDRBS3,EPAS1,ITPR1,GPR85,GMPR,CACNA1A,SLC1A3,CACNA1C,COX7A1,NDRG1,SCUBE1,PODXL,ST3GAL1,PPARGC1A,COX10,PLXNA4,PRNP,MYH7B,JUN,TGFB2,DTNA,NEBL,FN1,FBXO32,CORO2B,ARHGAP24,COQ5,REEP1,SDK1,CXCL10,DAB1,NR4A3,NDUFAF6,PKIA,BHLHE40,FAM187B,ACO2,TUBA8,ITM2C,CDKN1C,TRIM72,CLIC5,BTG2,THRB,TENM4,FHL1,PTPRM,LDB3,ADM,JPH1,SYNE1,ROBO1,KBTBD13,GYS1,DUSP10,TIMP3,ACADM,RNF150,NXPE3,MYBPC2,TNFRSF19,MYOF,GFRA1,PROX1,SPTB,PTGR2,TGFBR3,PTP4A3,SETBP1,PXDN,KIT,KCNMA1,ADSSL1,NDUFS2,CDH13,ITGA7,MAPT,SMTNL2,PPARA,PDZRN3,MGLL,MATN2,RBMS3,CAMK2B,HCN4,PRKAA2,SMPX,CXCR4,SRL,THBS1,THSD4,AURKB,NCALD,CLCN1,ASB16,CECR2,ABLIM1,ABLIM2,HSF2,SLIT1,SLIT2,FLNC,SH3BGR,CAP2,RUNX1T1,EGLN3,KCNJ11,MDH2,SORBS2,PPP2R3A,MEIS2,EFR3B,MAPK12,SULF2,SLC8A3,SLCO3A1,NT5C1A,KIF26B,LYRM7,PCDHB16,TCEA3,RTN4IP1,COQ8A","240","317.0","Dpf3","false","false","Cluster 2","Clustered","9.12087912087912","0","ENSMUSG00000021221"
"291","","",,,"Kif21a","false","false","Cluster 2","Clustered","9.382352941176471","0","ENSMUSG00000022629"
"290","","",,,"Dgat1","false","false","Cluster 2","Clustered","9.847619047619048","0","ENSMUSG00000022555"
"289","","",,,"Gpt","false","false","Cluster 2","Clustered","8.672727272727272","0","ENSMUSG00000022546"
"286","","",,,"Tbc1d31","false","false","Cluster 2","Clustered","9.844202898550725","0","ENSMUSG00000022364"
"1310","","",,,"Myh10","false","false","Cluster 2","Clustered","9.545454545454547","0","ENSMUSG00000020900"
"1309","ARCHS4 Coexpression,836;Enrichr Queries,66;GTEx Coexpression,124","MDC1,AHCYL2,IFITM1,MKI67,CLDN1,IFIT3,ICAM1,LGALS3,CHEK2,MYB,LIPG,LONP1,CYP1B1,SOX9,CHAC1,HOXA5,EPHB3,HOXA4,IER3,EPHA4,PAQR5,ENTPD8,ACSL5,SLC51B,CLDN4,HOXB4,SUCLG2,HOXB3,HOXB8,EPAS1,HSD11B2,STC2,TRPM5,TRPM6,PRELID2,NGFR,TRAP1,JUN,FZD5,PLK2,MCAM,PLK1,FN1,IGF2,FZD9,PYCR1,PYCR2,FOSL1,NET1,SULT1B1,TPX2,FXYD3,CDKN1C,PIGR,BTG2,MOGAT2,HNF4G,ADM,SLC7A11,PTPRH,LRRC31,C1QTNF1,ADAMTSL4,HNF4A,ANKRD1,TIMP3,RAC3,TINAG,LEFTY1,EDN1,ANXA1,CLUH,TPSG1,ANXA3,PAX4,ANO9,UGDH,PXDN,PHLPP2,TAGLN,PKN3,FAM129A,CXCR4,HOXD13,PTGS2,MSX1,FLNC,CHML,AOC1,CDKN2B,PKLR,MDH2,MOCOS,GUCA2B,GUCA2A,DHRS3,SULF2,FABP1,COL3A1,KRT18,PCDHB16,FOSB,NCAPD2,FRYL,FOXA1,PLOD2,PLAT,CELSR1,ETS1,CDH2,PLAU,CHP2,FADS1,PLS1,TGM2,KCNH2,DGAT1,IGFBP5,FST,WNT5A,IGFBP2,MUC3A,SLC9A3,ERN2,HIC2,COL4A2,TMEM139,NAAA,ANKS6,NUPR1,PHLDB2,ABHD3,CACNA1A,TNFRSF11A,NDRG1,PDZD3,SCIN,PRNP,TGFB2,VDR,HMGA1,HMGA2,INHBB,EFNA1,CXCL10,BMP2,TMEM236,P4HA2,LHX1,BHLHE40,SLC26A3,PHF19,HSPB1,NRARP,LAMC2,LMNB1,CASP7,UGT2A3,UPP1,GAL3ST2,URAD,PLAUR,REXO2,ETV4,ARL4C,CCNA2,ALDH1A3,PTP4A3,VGF,ESPL1,CDHR5,ACSS2,SEMA3C,REP15,RGS16,LEF1,THBS1,AURKB,SELENBP1,MUC2,GNA11,POLD1,BPNT1,SLIT2,ATOH1,R3HDML,SEMA4G,MEIS2,TICRR,MYO1A,GLOD5,TRIM31,PPP1R14D","271","342.0","Hoxb9","false","false","Cluster 2","Clustered","8.836363636363636","0","ENSMUSG00000020875"
"283","","",,,"Nadk2","false","false","Cluster 2","Clustered","10.5","0","ENSMUSG00000022253"
"282","","",,,"Cmbl","false","false","Cluster 2","Clustered","8.583333333333332","0","ENSMUSG00000022235"
"280","","",,,"Emc9","false","false","Cluster 2","Clustered","10.057142857142857","0","ENSMUSG00000022217"
"2327","","",,,"Serpina1e","false","false","Cluster 2","Clustered","8.666666666666668","0","ENSMUSG00000072849"
"279","","",,,"Jph4","false","false","Cluster 2","Clustered","8.952380952380953","0","ENSMUSG00000022208"
"277","","",,,"Fyb","false","false","Cluster 2","Clustered","10.196078431372548","0","ENSMUSG00000022148"
"276","","",,,"Dnajc3","false","false","Cluster 2","Seed","10.509803921568627","0","ENSMUSG00000022136"
"275","","",,,"Slc39a14","false","false","Cluster 2","Clustered","9.139705882352942","0","ENSMUSG00000022094"
"1296","","",,,"Zkscan17","false","false","Cluster 2","Clustered","9.0","0","ENSMUSG00000020472"
"271","","",,,"Tkt","false","false","Cluster 2","Clustered","9.625","0","ENSMUSG00000021957"
"270","","",,,"Cryl1","false","false","Cluster 2","Clustered","9.9","0","ENSMUSG00000021947"
"269","","",,,"Rnase4","false","false","Cluster 2","Clustered","9.44","0","ENSMUSG00000021876"
"268","","",,,"Ero1l","false","false","Cluster 2","Clustered","9.714285714285715","0","ENSMUSG00000021831"
"1291","","",,,"Osbp2","false","false","Cluster 2","Clustered","8.454545454545455","0","ENSMUSG00000020435"
"267","","",,,"Plau","false","false","Cluster 2","Clustered","9.894736842105264","0","ENSMUSG00000021822"
"2314","","",,,"Trim80","false","false","Cluster 2","Clustered","10.035087719298247","0","ENSMUSG00000070332"
"266","","",,,"Nid2","false","false","Cluster 2","Clustered","8.761904761904763","0","ENSMUSG00000021806"
"1289","","",,,"Vdac1","false","false","Cluster 2","Clustered","10.24561403508772","0","ENSMUSG00000020402"
"1285","","",,,"Slc36a1","false","false","Cluster 2","Clustered","10.153846153846155","0","ENSMUSG00000020261"
"261","","",,,"Lect2","false","false","Cluster 2","Clustered","9.27450980392157","0","ENSMUSG00000021539"
"2308","","",,,"Selenbp2","false","false","Cluster 2","Clustered","9.952380952380953","0","ENSMUSG00000068877"
"1284","","",,,"Prmt2","false","false","Cluster 2","Clustered","9.696969696969697","0","ENSMUSG00000020230"
"260","","",,,"Ctsl","false","false","Cluster 2","Clustered","8.761904761904763","0","ENSMUSG00000021477"
"2306","","",,,"Mgam","false","false","Cluster 2","Clustered","8.672727272727272","0","ENSMUSG00000068587"
"1282","","",,,"Slc5a4b","false","false","Cluster 2","Clustered","8.672727272727272","0","ENSMUSG00000020226"
"258","","",,,"Exoc3l4","false","false","Cluster 2","Clustered","8.901098901098901","0","ENSMUSG00000021280"
"2302","ARCHS4 Coexpression,6;Enrichr Queries,18;GTEx Coexpression,167","GFI1,STMN3,SOGA1,DPYSL5,CHEK2,DPYSL3,MYB,CYP1B1,SOX9,THSD7A,MNX1,CHGB,TSPYL2,EPHA4,CACNA2D1,KCNK16,P3H3,CPT1C,VWA5B2,ISL1,MAPK8IP1,CLDN9,MAP1B,LGALS12,KCTD12,MXRA7,CTXN1,STX1A,BEX2,NRN1,MAGED1,STXBP1,TTBK1,GHRHR,MAATS1,PCBP3,PCBP4,MAP2,MAP6,RHBDL3,SCN3A,NKX2-2,JUN,FZD3,CARMIL3,PTPRN2,BTBD17,IGF2,FZD9,ST18,GADD45G,XKR7,KLHDC8A,ID4,PRR36,CD200,CDKN1C,PCSK1,BTG2,TENM3,KCNC1,PTPRN,PCSK9,ROBO1,PCLO,TUBA1A,SLC22A17,DNER,FFAR4,NEFL,NEFM,KIF1A,FFAR1,RPS6KL1,ACTL6B,TPSG1,ANO8,PAX6,MANEAL,PROX1,SYP,AP3B2,CBFA2T3,FAM222A,PXDN,KIT,KCNMA1,MAPT,PDZRN3,SAMD5,COL11A2,CRYBA2,SEZ6,CXCR4,TMEM163,CAMK2N1,PLAGL1,GPC2,PAK3,P4HTM,RUNX1T1,RIC3,GDF11,LHFPL4,NMNAT2,POU4F1,GCK,PCDHB16,RIMBP2,SARM1,FOSB,FOXA1,TUSC3,CELSR1,CELSR3,RIMS2,SCGN,FADS2,DACH1,SALL2,CDH2,KIF5C,BASP1,PLXNC1,HADH,KCNH2,CASR,SEMA6A,KIRREL2,IGFBP5,KCNH6,TMEM178B,APLP1,ANXA10,SHISA2,MYT1,RUNDC3A,ACAP3,OLFM1,CACNB3,MYCN,GPRIN1,MADD,SCG5,SCG3,SCG2,CUL7,BRSK2,SHC2,PARM1,CACNA1B,FOXO6,CACNA1A,LPL,NREP,CPLX2,CACNA1H,PHF21B,NEUROD1,IGSF21,PCSK1N,NPTX1,NPTX2,TAC1,ASIC1,SYT5,TMEM120B,PRNP,TCAF1,BDNF,INHBB,SYT7,GNAO1,AHI1,CXCL10,BMP2,PLCXD3,NBEA,LHX1,BHLHE40,CPE,CNIH2,MXD4,SNAP25,PODXL2,CELF3,ATP2A3,PKD1,ELFN1,UNC80,MCF2L,GDAP1L1,ARFGEF3,ADGRV1,ABCC8,KSR2,LSS,SSTR3,ADRA2A,ARL4C,PTP4A3,VGF,DDAH2,CAMK2B,RGS16,LEF1,CRMP1,THBS1,PPM1E,AURKB,DLL3,RASD1,GNG4,SPOCK2,CACNG4,SEC11C,CHGA,MARCKSL1,CADPS,PDX1,SYT14,SYT13,MEIS2,BAIAP3,POMC,SLC4A8,NFASC,NOVA2,UNC79","20","63.67","Insm1","false","false","Cluster 2","Clustered","9.004267425320055","0","ENSMUSG00000068154"
"254","","",,,"Pfkp","false","false","Cluster 2","Clustered","8.857142857142858","0","ENSMUSG00000021196"
"1277","","",,,"Pald1","false","false","Cluster 2","Clustered","9.545454545454547","0","ENSMUSG00000020092"
"2300","","",,,"Sptbn2","false","false","Cluster 2","Clustered","8.454545454545455","0","ENSMUSG00000067889"
"252","","",,,"9030617O03Rik","false","false","Cluster 2","Clustered","9.705882352941176","0","ENSMUSG00000021185"
"251","","",,,"Prkch","false","false","Cluster 2","Clustered","9.12087912087912","0","ENSMUSG00000021108"
"1275","","",,,"Tcp11l2","false","false","Cluster 2","Clustered","9.9","0","ENSMUSG00000020034"
"250","","",,,"Dhrs7","false","false","Cluster 2","Clustered","9.625","0","ENSMUSG00000021094"
"249","","",,,"Klhdc2","false","false","Cluster 2","Clustered","9.230769230769232","0","ENSMUSG00000020978"
"247","","",,,"Vamp2","false","false","Cluster 2","Clustered","10.31578947368421","0","ENSMUSG00000020894"
"1271","","",,,"1700040L02Rik","false","false","Cluster 2","Clustered","10.274725274725276","0","ENSMUSG00000019945"
"246","","",,,"Aloxe3","false","false","Cluster 2","Clustered","9.220588235294118","0","ENSMUSG00000020892"
"245","","",,,"Tac4","false","false","Cluster 2","Clustered","8.568421052631578","0","ENSMUSG00000020872"
"243","","",,,"Slc6a4","false","false","Cluster 2","Clustered","9.852631578947369","0","ENSMUSG00000020838"
"241","","",,,"Cluh","false","false","Cluster 2","Clustered","9.96103896103896","0","ENSMUSG00000020741"
"240","","",,,"Ern1","false","false","Cluster 2","Clustered","9.716666666666667","0","ENSMUSG00000020715"
"1264","","",,,"Slc16a10","false","false","Cluster 2","Clustered","9.545454545454547","0","ENSMUSG00000019838"
"2285","","",,,"Selenop","false","false","Cluster 2","Clustered","8.416666666666666","0","ENSMUSG00000064373"
"1260","","",,,"Etnppl","false","false","Cluster 2","Clustered","8.50909090909091","0","ENSMUSG00000019232"
"235","","",,,"Pold2","false","false","Cluster 2","Clustered","8.571428571428571","0","ENSMUSG00000020471"
"233","","",,,"Upp1","false","false","Cluster 2","Clustered","9.852631578947369","0","ENSMUSG00000020407"
"231","","",,,"Rnf130","false","false","Cluster 2","Clustered","9.657142857142858","0","ENSMUSG00000020376"
"1255","","",,,"P4ha2","false","false","Cluster 2","Clustered","9.808333333333334","0","ENSMUSG00000018906"
"2279","","",,,"Trim38","false","false","Cluster 2","Clustered","9.102564102564102","0","ENSMUSG00000064140"
"230","","",,,"Gfpt2","false","false","Cluster 2","Clustered","8.672727272727272","0","ENSMUSG00000020363"
"227","","",,,"Pfkl","false","false","Cluster 2","Clustered","9.298701298701298","0","ENSMUSG00000020277"
"1251","","",,,"Tnfsfm13","false","false","Cluster 2","Clustered","8.590909090909092","0","ENSMUSG00000018752"
"2273","ARCHS4 Coexpression,446;Enrichr Queries,136;GTEx Coexpression,212","CHIC1,MAML2,DIXDC1,RORA,FRY,NR3C1,CELSR1,ETS1,CLU,SLC8A1,MYLK,ICAM1,LGALS3,GJA1,CDH2,BASP1,RPS6KA2,CHEK2,DPYSL3,CYP1B1,PIP4K2A,PLXNC1,FADS1,TGM2,BNIP3L,TRIQK,PRKCA,FRMD4A,RUNDC3A,TMEM252,OVOL2,SELENOM,KATNAL1,COL4A2,COL4A1,MAP1B,SCG5,KCNQ4,SCG3,MGARP,MXRA7,KCTD12,PLPP3,MYL9,OSBP2,RASL12,PFKFB3,AKNA,EPB42,ARHGEF25,EPAS1,ZC4H2,STXBP1,ITPR1,CACNA1A,LPL,ITPR2,CACNA1C,NREP,CFP,NDRG1,CACNA1H,INPP5A,CALD1,PRKAR2B,PDGFC,HMOX1,TSPAN2,PRNP,TRAP1,JUN,TGFB2,RBPMS,ATP8B2,FZD7,FN1,CRIM1,FZD9,PYCR1,KLHL23,REEP1,CXCL10,MAP3K15,PTPRC,NBEA,MYO5B,RCAN2,BHLHE40,MRVI1,SERINC1,PAM,FERMT2,ITM2C,BTG2,RNF11,MAST3,TGFB1I1,CELF2,ATP2A3,DBI,SLC7A11,SOBP,SYNE1,ROBO1,LBH,ADGRE5,TIMP2,TIMP3,TCP11L2,IDS,FFAR2,RNF150,LBR,ZCCHC24,KLF12,ANXA1,CAMK1D,GPCPD1,SPTB,ETV5,ACTA2,ARL4C,TGFBR3,FGR,PTP4A3,SETBP1,IRF1,KCNMA1,PXDN,DPYD,CDC42EP3,ATP6V1B2,RBMS1,PLEKHO1,PDE5A,SPACA6,PLCB1,PDZRN3,TLR4,MGLL,VAMP2,RBMS3,HEMGN,NAPB,TAGLN,PLPPR2,FAXC,CCDC69,PRUNE2,AMIGO2,FGL2,FAM129A,CXCR4,THBS1,AURKB,NCALD,HSPD1,GNG2,RAB23,ALOX5,MXI1,TCEAL1,ERBB2,NT5DC3,FLNA,FYN,APBB1,SLC36A4,RUNX1T1,MDH2,PLCL1,SORBS2,LHFPL2,SORL1,MEIS2,SULF2,WEE2,XK,OSTM1,SLCO3A1,SYT11,QPCT,TMEM56,PCDHB16,SARM1,MSRB3,YPEL3,MEGF9","180","264.7","Jazf1","false","false","Cluster 2","Clustered","8.857142857142858","0","ENSMUSG00000063568"
"224","","",,,"Cdk17","false","false","Cluster 2","Clustered","9.663157894736841","0","ENSMUSG00000020015"
"223","","",,,"Cfap54","false","false","Cluster 2","Clustered","9.742857142857142","0","ENSMUSG00000020014"
"1246","","",,,"Mapt","false","false","Cluster 2","Clustered","9.230769230769232","0","ENSMUSG00000018411"
"222","","",,,"Ifngr1","false","false","Cluster 2","Clustered","10.411764705882353","0","ENSMUSG00000020009"
"220","","",,,"Ahi1","false","false","Cluster 2","Clustered","9.952380952380953","0","ENSMUSG00000019986"
"2268","","",,,"AI413582","false","false","Cluster 2","Clustered","9.12087912087912","0","ENSMUSG00000062753"
"219","","",,,"Cdk1","false","false","Cluster 2","Clustered","9.487179487179487","0","ENSMUSG00000019942"
"218","","",,,"P4ha1","false","false","Cluster 2","Clustered","9.010989010989011","0","ENSMUSG00000019916"
"2265","","",,,"Erbb2","false","false","Cluster 2","Clustered","8.50909090909091","0","ENSMUSG00000062312"
"1239","","",,,"Pipox","false","false","Cluster 2","Clustered","9.952380952380953","0","ENSMUSG00000017453"
"212","ARCHS4 Coexpression,642;ENCODE ChIP-seq,77;Enrichr Queries,496;ReMap ChIP-seq,225;GTEx Coexpression,858","MDC1,ANKLE1,MAML2,TMEM94,ENO1,CREB3L4,CYP1B1,XYLB,IER3,HES7,DNAAF1,SYTL1,RNASE4,PDZK1,CLDN6,ACE2,EID2,CLDN9,TEP1,HOXB4,JTB,HOXB3,HOXB8,GPLD1,RETSAT,CFI,CFP,SLC30A10,SLC5A3,LDHA,AGMO,GRPEL2,HMOX1,RREB1,ST3GAL2,LHPP,NFE2,JUN,ABCA5,MTERF2,TIPARP,FZD4,EDEM2,NFATC3,FN1,ABCA7,NR1D1,SLC16A13,FOSL1,CYP1A1,ZBTB8B,FERMT2,ARHGAP9,BTG2,ADM,JPH4,TMEM189,TIMP2,TCP11L1,RMI2,LYPLA1,ACTL6B,MYOF,TMC8,SLC39A13,ELOVL6,APBB1IP,MMP11,PLCB3,NCOR1,TUBB2A,ANGPTL6,OAF,PXDN,DPYD,KIFC3,PPARA,PAFAH1B3,VAMP2,PLPPR2,PTAFR,SEZ6,PTGS2,FGD3,SLC17A9,ALOX5,SC5D,CKB,IL12RB1,CENPU,EGLN3,GSN,F10,AGK,TMEM62,FMO5,DHRS3,AGT,PSMB9,SULF2,AGMAT,OSTM1,CLCF1,CENPM,FOSB,YPEL3,HSPA1B,CDKN3,ALDH1L1,NRROS,ANKRD13D,CHPF,RAB3D,RORA,PLOD2,TNF,FADS3,FADS2,SLC25A48,EFEMP2,NUDT19,NEK1,PLXNC1,PIM2,SLC25A45,SLC16A3,ZFP37,FADS1,SLC16A5,DGAT1,NEAT1,HIC2,TPST1,MELK,ADAM8,AJUBA,SQSTM1,PHLDB2,PFKFB4,CUL7,PFKFB3,KHDRBS3,HVCN1,ARL3,TROAP,ABHD8,GPR85,ITPR2,AK4,HMMR,ACAT1,NEUROD2,PMVK,SDF2L1,OSBPL6,BTN2A2,RASL10B,TMEM132A,HPS4,ADAP1,CXCL10,MLXIPL,GGCX,REEP5,P4HA2,CPE,SP5,SERINC1,CNIH2,RNF186,TRIM72,ITGAM,ITGB5,PTPN22,ETFA,DUSP18,PIK3C2B,PSTPIP1,DUSP10,SCRN1,DDI2,DSE,UGT2A3,WDR6,ME2,LBR,SLC37A3,SMIM14,SLC36A1,PEG3,CKAP2L,ARL4C,SLC25A15,PTP4A3,PKM,MEP1A,BIRC5,ANG,ITGA5,ST6GALNAC6,CEBPA,PLEKHH2,SEMA3G,CXXC5,AP3M2,SELENBP1,ZNRF1,CECR2,DCAF17,E2F2,BAK1,IGF2BP2,ALOXE3,MARCKSL1,RNF24,SMOX,MMAB,CCDC58,MACC1,CTNS,SYT14,FBXL16,MBOAT4,TPD52L1,TTC39C,PFKP,SPARC,FAM89B,GDE1,KLHDC7A,GCC1,MKI67,CISD3,ICAM1,LGALS3,RINL,FRAT2,CHEK2,LONP1,TNFSF10,SOX9,PAQR7,IL1R1,ALG2,TM4SF4,MFSD11,CPT1C,GCAT,POR,KCTD14,RIN3,MXRA7,ATP6V0D1,KIF20B,PLPP3,RWDD2A,GIPR,EPAS1,EIF5A2,SARAF,B4GALNT1,SNX9,BBS1,SLC33A1,IGF2,PYCR1,NBEAL2,PYCR2,SMARCA1,CIDEC,GADD45G,NET1,TPX2,VNN1,NCEH1,ITM2C,COL18A1,TMEM151B,PCSK9,PTPRM,SLC7A11,LIMD2,KHK,HERPUD1,SH3PXD2A,CTSL,ANKRD1,ACADS,CD53,PSD,NXPE3,PCYT1B,TNFRSF12A,ANO8,SYP,TUBG2,VAV1,PDRG1,ANO3,TLR6,MAPT,ALDOA,NAPB,AKR1D1,CXCR4,ZDHHC24,CAPG,HSD17B6,STX11,CST3,TCEAL8,RXRA,REM2,EMC9,CAP2,LHFPL5,ALDH4A1,KBTBD3,STK17B,KLHL7,TCEA2,B9D2,ESYT1,CD68,SCARB1,ZFAND4,CD80,NRM,BUB1B,NR3C1,CELSR1,ETS1,CCDC28A,TGM1,SYDE2,RGS5,PLAU,BASP1,FAM162A,COTL1,CAPN2,TGM2,GAS2L3,G6PC,SDHA,PDIA5,ERN1,DCTD,DOK3,DOK4,COL4A1,ODF3B,RTN2,CCDC149,PLD5,ARHGAP18,CACNA1A,PLD1,PLCXD1,NDRG1,ADGRG1,CCNB1,SCUBE1,SCIN,ADGRG6,H1FX,WNT3,PRNP,TCAF1,ACBD4,HMGA1,HMGA2,ARHGAP24,DNAJC18,ISG20,UEVLD,EFNA1,QDPR,EFNA3,NR4A3,DLG4,BHLHE40,NABP1,AMOTL2,PYROXD2,GALK1,ABCD4,TTC26,ACADVL,DOCK4,PLEK,SLC2A1,HMGB2,HSPB1,SLC2A4,LMNB1,RND1,TTC28,MFSD9,DBP,ALDH2,ABCD1,HIST1H1C,PLAUR,IQCD,GPCPD1,UPK3A,GIP,TAPBP,FGR,CCNA2,TBC1D2,VGF,GFOD1,DDAH2,IRF1,NDUFS2,RBMS1,HEMGN,LAMA5,HLF,ATP1A1,THBS1,AURKB,RASD1,POLD1,MXI1,NT5DC3,STOM,HES1,BPNT1,CMTM3,QPCTL,ARID3A,UFM1,SARDH","458","459.6","Arid3a","false","false","Cluster 2","Clustered","9.27450980392157","0","ENSMUSG00000019564"
"1236","","",,,"Atxn10","false","false","Cluster 2","Clustered","9.625","0","ENSMUSG00000016541"
"211","","",,,"Scn1b","false","false","Cluster 2","Clustered","8.50909090909091","0","ENSMUSG00000019194"
"208","ARCHS4 Coexpression,331;Enrichr Queries,177;GTEx Coexpression,760","NARF,ANKRD13D,ANKLE1,NRM,HJURP,BUB1B,CPOX,CELSR1,MKI67,ETS1,SMC4,SMC2,PYCARD,FRAT2,CHEK2,MYB,COTL1,SLC16A6,LONP1,NUSAP1,NEK2,SKP2,IER3,ZBP1,GEN1,PAQR9,KNL1,CDC25C,KNSTRN,DEPDC1B,NEIL3,DOK3,MELK,SOAT2,PLBD1,RIN3,ADAM8,DNA2,KIF20B,PRR11,ASF1B,OSBP2,PIF1,BLM,CDCA2,EPB42,INSIG1,TROAP,SMIM1,ARHGAP19,NCAPG,HMMR,CFP,CCNB2,CCNB1,RACGAP1,HMOX1,FAM83D,S100A11,ST3GAL2,PLK4,NFE2,JUN,PLK1,HMGA1,NBEAL2,BRI3BP,ISG20,FOSL1,TPX2,MFHAS1,SLC6A9,BHLHE40,CDK1,HPSE,PHF19,ARHGAP9,DENND1C,ARHGAP11A,BTG2,ITGAM,HMGB2,SLC2A1,KIF11,SLC7A11,FOXM1,LMNB1,LIMD2,KIF15,PSTPIP1,TUBA1B,DDI2,CASP1,PBK,TCP11L2,TK1,LBR,HIST1H1C,CD53,HELLS,RMI2,CKAP2L,ELOVL6,SPTB,VAV1,APBB1IP,CCNA2,SLC25A15,ASPM,PTP4A3,TUBB2A,ESPL1,TFDP2,PXDN,CAT,BMP2K,CKS2,BIRC5,DTL,HEMGN,CXCR4,TTK,CENPA,THBS1,AURKB,FAM117A,AURKA,FGD3,SH3BP1,POLD1,RAD54L,MROH6,BAK1,IL12RB1,BUB1,E2F8,CENPU,ARID3A,TICRR,RIT1,CENPF,XK,TMEM56,CENPM,NCAPD2,CD244,SPC24,CDKN3,MAD2L1","406","422.7","E2f2","false","false","Cluster 2","Clustered","9.230769230769232","0","ENSMUSG00000018983"
"2256","","",,,"Cracr2a","false","false","Cluster 2","Clustered","9.382352941176471","0","ENSMUSG00000061414"
"2254","","",,,"Slc4a4","false","false","Cluster 2","Clustered","8.50909090909091","0","ENSMUSG00000060961"
"204","","",,,"Slc2a4","false","false","Cluster 2","Clustered","8.672727272727272","0","ENSMUSG00000018566"
"202","","",,,"Ksr1","false","false","Cluster 2","Clustered","9.058823529411764","0","ENSMUSG00000018334"
"2249","","",,,"H2-Q7","false","false","Cluster 2","Clustered","9.230769230769232","0","ENSMUSG00000060550"
"201","","",,,"Cyb5r3","false","false","Cluster 2","Clustered","9.230769230769232","0","ENSMUSG00000018042"
"2248","","",,,"Tnfrsf19","false","false","Cluster 2","Clustered","9.615384615384615","0","ENSMUSG00000060548"
"1223","","",,,"Csf1","false","false","Cluster 2","Clustered","10.035087719298247","0","ENSMUSG00000014599"
"199","","",,,"Birc5","false","false","Cluster 2","Clustered","9.852631578947369","0","ENSMUSG00000017716"
"198","","",,,"Rhbdl3","false","false","Cluster 2","Clustered","9.696969696969697","0","ENSMUSG00000017692"
"196","","",,,"Timp2","false","false","Cluster 2","Clustered","8.666666666666668","0","ENSMUSG00000017466"
"195","","",,,"C1qtnf1","false","false","Cluster 2","Clustered","8.986928104575163","0","ENSMUSG00000017446"
"2243","","",,,"Rcan3","false","false","Cluster 2","Clustered","9.010989010989011","0","ENSMUSG00000059713"
"193","","",,,"Gast","false","false","Cluster 2","Clustered","8.476190476190476","0","ENSMUSG00000017165"
"191","","",,,"Bik","false","false","Cluster 2","Clustered","8.452631578947368","0","ENSMUSG00000016758"
"1215","","",,,"Slc5a1","false","false","Cluster 2","Clustered","8.50909090909091","0","ENSMUSG00000011034"
"1214","","",,,"Mcoln2","false","false","Cluster 2","Clustered","9.487179487179487","0","ENSMUSG00000011008"
"2236","ARCHS4 Coexpression,711;ENCODE ChIP-seq,83;Enrichr Queries,332;ReMap ChIP-seq,117;GTEx Coexpression,802","IL1RN,IFITM1,MT-ND5,FAM89B,AQP9,ENO1,IFI30,MKI67,IFIT3,ICAM1,LGALS3,FRAT2,RINL,MYB,TNFSF10,LONP1,CYP1B1,IER3,HES7,RSAD2,IL1R1,DAPK1,DHDH,CMBL,MFSD11,GCAT,CLDN6,HOXB9,WDR81,KATNAL1,CLDN9,SOAT2,RRAGB,LGALS12,PLBD1,HOXB3,RIN3,MXRA7,HOXB8,ATP6V0D1,STX1A,SLC22A4,NUMBL,ABCB6,EPB42,SMIM1,MGST1,ABCB9,CFP,CRACR2B,PRKAR2B,TSPAN4,ST3GAL4,HMOX1,KCNN4,SNX8,NFE2,JUN,FAM78A,SLC33A1,NFATC3,FN1,CIDEB,PYCR1,NBEAL2,ABCA7,NR1D1,SLC16A13,GADD45G,FOSL1,CCDC88B,LPAR5,CCNJL,ITM2C,ARHGAP9,BTG2,TMEM151B,TGFB1I1,ADM,PYGL,SLC7A11,VSIR,KHK,LIMD2,TMEM189,GYS1,FFAR3,FFAR2,CD53,ATP6V0B,TPI1,ANXA1,TNFRSF12A,ANXA3,ROM1,ANO8,COPZ2,TMC8,SLC39A13,TUBG2,CBFA2T3,VAV1,APBB1IP,PLCB3,TUBB2A,INF2,PXDN,TLR6,ALDOA,PAFAH1B3,VAMP2,DBN1,MGLL,TLR2,CD63,PLPPR2,PTAFR,FAM129A,CXCR4,CAPG,PTGS2,TMEM71,FAM117A,FGD3,ALOX5,CARNS1,UCP2,IL12RB1,RNF130,REM2,CDKN2D,GSN,SLC31A2,PTGES2,GLYCTK,PDZK1IP1,DHRS3,ALDH4A1,HIST3H2A,XK,CLCF1,QPCT,FOSB,B9D2,ESYT1,CD68,YPEL3,SCARB1,NRROS,CHPF,RAB3D,NAB2,CELSR1,ETS1,CLU,PYCARD,FADS3,MFSD13A,EFEMP2,IL18RAP,COTL1,CAPN2,NEK1,PLXNC1,PIM2,SLC25A45,SLC16A3,FADS1,TGM2,KCNH2,PCYT2,KCNH7,CYBB,NEAT1,ERN1,DOK3,RAB37,MFNG,TBC1D24,S100A6,ODF3B,S100A5,ADAM8,SQSTM1,LY6E,OSBP2,RTN2,ABHD8,LY96,GMPR,LPL,PLD1,NDRG1,ADGRG1,UAP1L1,TBC1D14,CYC1,ANKZF1,SDF2L1,ACBD4,HMGA1,BMX,ISG20,SEPSECS,CXCL10,ATG16L2,P4HA2,DLG4,BHLHE40,MAFK,HPSE,GALK1,TTC26,ACADVL,ITGAM,MAST3,PLEK,SLC2A1,HMGB2,HSPB1,YBX2,NRARP,SLC2A4,ITGAL,PSTPIP1,DBP,ADGRE5,UPP1,LBR,CFAP45,HIST1H1C,SLC36A1,ABCC4,EGFL7,CHPF2,SH2D3C,PLAUR,FGR,PTP4A3,HSH2D,PKM,RASA3,IRF1,ALDH1A1,CAT,ITGA7,NDUFS2,ITGA5,GAPDH,ST6GALNAC4,ST6GALNAC6,HEMGN,CEBPA,RGS14,FGL2,SLC5A11,CXXC5,THBS1,AURKB,SELENBP1,ZNRF1,MXI1,TRIM47,E2F2,DNAJB9,ALOXE3,LINGO3,FAHD1,RNF24,ARID3A,FBXL16,SORL1,CPPED1,MAPK13,FAM131A,TRIM35","378","409.0","Nfe2","false","false","Cluster 2","Clustered","9.414414414414413","0","ENSMUSG00000058794"
"186","","",,,"Adamtsl4","false","false","Cluster 2","Clustered","10.017316017316018","0","ENSMUSG00000015850"
"1209","","",,,"Slc47a1","false","false","Cluster 2","Clustered","8.416666666666666","0","ENSMUSG00000010122"
"2232","","",,,"Gstp3","false","false","Cluster 2","Clustered","8.454545454545455","0","ENSMUSG00000058216"
"1208","","",,,"Kif19a","false","false","Cluster 2","Clustered","9.230769230769232","0","ENSMUSG00000010021"
"183","","",,,"Lama5","false","false","Cluster 2","Clustered","9.625","0","ENSMUSG00000015647"
"1207","","",,,"Pla2g12b","false","false","Cluster 2","Clustered","8.672727272727272","0","ENSMUSG00000009646"
"181","","",,,"Cd83","false","false","Cluster 2","Clustered","8.748538011695906","0","ENSMUSG00000015396"
"179","","",,,"Slc25a13","false","false","Cluster 2","Clustered","9.625","0","ENSMUSG00000015112"
"1200","","",,,"Stx1a","false","false","Cluster 2","Clustered","9.010989010989011","0","ENSMUSG00000007207"
"176","","",,,"Gip","false","false","Cluster 2","Clustered","8.5","0","ENSMUSG00000014351"
"175","ARCHS4 Coexpression,367;Enrichr Queries,95;GTEx Coexpression,236","OLFML2B,SPARC,CSF1,CHPF,IRS1,PLOD2,GXYLT2,CELSR1,ETS1,FGFRL1,ICAM1,MYLK,EFEMP2,GJA1,EFEMP1,EVA1B,PLAU,SCMH1,DPYSL3,PALM,DAG1,PLS3,CYP1B1,SOX9,FADS1,TGM2,IER3,SCARA3,IGFBP5,F2R,AFAP1,P3H3,HSPG2,DKK3,SELENOM,COL4A2,COL4A1,MAP1B,MAP7D1,S100A6,MXRA7,PLPP3,MYL9,AJUBA,PHLDB2,TRABD2B,RASL12,EPAS1,RNF180,FBLN2,NDRG1,CACNA1H,SLC9A3R2,ADGRG1,CYB5R3,CALD1,PDGFC,TSPAN4,HMOX1,IGFBP7,RAB11FIP5,FZD1,PRNP,CRTAP,JUN,TGFB2,RBPMS,ATP8B2,MCAM,PLK2,GFPT2,FZD7,TMEM132A,ZBTB10,FN1,SSC5D,ARHGAP23,EHD2,CXCL10,COL1A2,BHLHE40,MRVI1,MAFK,AMOTL2,FAT4,FERMT2,PCDHB7,ITM2C,CDKN1C,GPSM1,COL18A1,BTG2,ITGB5,TGFB1I1,SLC2A1,GPR20,HSPB1,ADM,TTC28,CASP12,TUBA1A,SH3PXD2A,TIMP2,TIMP3,SCARF2,DACT1,DLGAP4,ADAMTS7,TNFRSF12A,CHPF2,TRPC1,MYOF,BGN,PLAUR,SLC39A13,TMEM173,CKAP4,ACTA2,ENAH,ARL4C,PTP4A3,INF2,DDAH2,IRF1,PLSCR4,PXDN,COL6A1,CDH13,PDE5A,GAS6,MGLL,DBN1,ITGA9,RBMS3,LAMA5,TAGLN,LRP1,CRIP2,SNX33,SEMA3F,CXXC5,CRIP1,THBS1,AURKB,FAM129B,GPC1,GNA11,NHS,FLNA,TRIM47,CKB,FLNC,SLC12A4,GSN,PRRX1,SORBS3,SULF2,COL3A1,PCDHB16,MSRB3","141","232.7","Glis2","false","false","Cluster 2","Clustered","9.130718954248367","0","ENSMUSG00000014303"
"174","","",,,"St3gal1","false","false","Cluster 2","Clustered","10.035087719298247","0","ENSMUSG00000013846"
"173","ARCHS4 Coexpression,119;Enrichr Queries,155;GTEx Coexpression,9","IFITM1,SPARC,STMN3,ABAT,LDLRAD3,MKI67,ICAM1,LGALS3,GJA1,CHEK2,RASSF5,DPYSL3,LONP1,CYP1B1,SOX9,CHAC1,CHGB,IER3,EPHA4,DAPK1,SYTL1,ADGRA3,PRKCA,ACSL3,MAPK8IP2,CPT1C,VWA5B2,EML6,SOAT2,MAP1B,PLPP3,STX1A,PFN2,BEX4,BEX3,BEX2,RWDD2A,FICD,MAGED1,EPAS1,NCAPG,CFP,TTBK1,PGBD5,STC2,SARAF,MAP6,HMOX1,MAP9,JUN,PTPRN2,FAM78A,PLK2,FZD7,FN1,FZD9,RAB39B,MYO5A,NBEAL2,ABCA7,FOSL1,CCDC88B,TPX2,RGL1,ZBTB8B,PRR36,FERMT2,ITM2C,DENND1C,BTG2,NRP2,PTPRN,GRIK4,ADM,SLC35F1,SLC7A11,RCSD1,ROBO1,LIMD2,JPH4,TUBA1B,SLC22A17,TIMP2,PBK,TIMP3,KIF1A,EMB,CD53,RPS6KL1,ANXA1,TPI1,TNFRSF12A,ELOVL2,ANXA5,TMC8,SLC35G2,ELOVL6,SYP,MANEAL,TUBG2,PROX1,AP3B2,APBB1IP,ENAH,TUBB2A,MMP16,PXDN,KIT,CDC42EP3,VAMP2,MGLL,MAGEH1,CD63,FAM129A,CXCR4,PTGS2,TMEM163,FGD3,CAMK2N1,CKB,PAK3,P4HTM,ARNT2,BCHE,GSN,LHFPL4,LHFPL2,DHRS3,SULF2,DCBLD2,PSMB9,MORN4,PCDHB16,RIMBP2,FOSB,YPEL3,TUSC3,HJURP,CELSR1,GIMAP6,ETS1,RIMS2,RIMS4,TUBB6,PLAU,BASP1,COTL1,NUSAP1,LZTS1,FADS1,TGM2,KCNH3,GAS2L3,IGFBP5,FST,IGFBP2,MITF,CASD1,RUNDC3A,TMEM130,ARMCX3,MELK,COL4A2,COL4A1,RAB37,MFNG,TBC1D24,SCG5,S100A6,SCG3,BRSK1,BRSK2,AKNA,UBA5,INSIG1,SLC1A3,NDRG1,PHF21B,PCSK1N,CCNB1,NXPH1,SYT5,PRNP,TGFB2,HMGA1,CRIM1,DNAJC12,HMGA2,CORO2B,AHI1,CXCL10,PTPRC,ATG16L2,DLG4,REEP2,BHLHE40,CDK1,CPE,DNAL1,PODXL2,ITGB5,CDCA7L,CELF3,SLC2A1,ATP2A3,HSPB1,DBI,ITGAL,ADGRE5,SCRN1,GDAP1L1,UPP1,ERC2,SUN2,ABCC8,PLAUR,ETV1,OLIG1,KSR2,ETV4,ARL4C,TGFBR3,FGR,PTP4A3,RCN1,DCT,IRF1,BIRC5,EVL,GAPDH,PLEKHH2,SEMA3C,RGS14,CCDC69,LEF1,CRMP1,NLRC3,THBS1,AURKB,DLL3,FYN,CCDC184,SEC11C,KCNJ5,CADPS,SYT14,SYT13,SORL1,BAIAP3,SLC4A8,FMNL2,NOVA2,FAM131A,ATXN10,UNC79","36","94.33","Etv5","false","false","Cluster 2","Clustered","9.771428571428572","0","ENSMUSG00000013089"
"172","","",,,"Ubxn11","false","false","Cluster 2","Clustered","10.057142857142857","0","ENSMUSG00000012126"
"2218","","",,,"Ces1d","false","false","Cluster 2","Clustered","8.454545454545455","0","ENSMUSG00000056973"
"2217","","",,,"Glipr1","false","false","Cluster 2","Clustered","9.230769230769232","0","ENSMUSG00000056888"
"169","","",,,"Adssl1","false","false","Cluster 2","Clustered","10.079710144927537","0","ENSMUSG00000011148"
"2216","ARCHS4 Coexpression,176;Enrichr Queries,113;GTEx Coexpression,581","SPARC,IRS1,BUB1B,PLOD2,MSANTD3,PLAT,CELSR1,MKI67,ETS1,SMC4,SMC2,ICAM1,MYLK,GJA1,TUBB6,CDH2,SALL2,PLAU,CHEK2,DPYSL3,NUSAP1,CYP1B1,SOX9,TGM2,IER3,WLS,WNT5B,IGFBP5,FST,WNT5A,F2R,P3H1,ADGRA3,P3H3,NEIL3,MELK,COL4A2,SMO,COL4A1,MAP1B,KDELR3,KIF20B,PLPP3,PRR11,MYL9,AJUBA,CDCA2,NCAPG,HMMR,NDRG1,NID2,CCNB2,LDHB,CCNB1,CALD1,PODXL,STC2,PDGFC,HMOX1,TNFRSF14,SRGAP1,MYH10,PRNP,JUN,TGFB2,BDNF,PLK2,FZD7,TFPI2,PLK1,FN1,HMGA1,CRIM1,SMARCA1,FOSL1,TPX2,COL1A2,BHLHE40,CDK1,AMOTL2,LRRN1,AMOTL1,FERMT2,ARHGAP11A,COL18A1,TENM3,HMGB2,SLC2A1,LAMC2,ADM,KIF11,SLC7A11,FOXM1,LMNB1,TIMP2,PBK,TIMP3,TK1,UPP1,ADAMTS7,CD53,HELLS,EDN1,ANXA1,MME,TNFRSF12A,ARHGEF15,CKAP2L,ITGA2,MYOF,ANXA5,PLAUR,ETV1,ELOVL6,ETV4,CKAP4,ETV5,CCNA2,ARL4C,ENAH,ASPM,RCN1,PTP4A3,PXDN,BIRC5,ITGA5,DTL,DBN1,VGLL3,TAGLN,SEC23A,SEMA3C,CCDC69,GCNT1,CXCR4,PTGS2,CENPA,THBS1,AURKB,AURKA,HSPD1,CECR2,IGF2BP3,IGF2BP2,CHML,SLIT2,BUB1,COL26A1,SLC16A1,TRPA1,PRRX1,TPBG,VEGFC,PTPN13,PTPN14,DCBLD2,CENPF,COL3A1,KRT18,FRAS1,NCAPD2,KCNK2,NECTIN3,SPC24","211","290.0","Hmga2","false","false","Cluster 2","Clustered","8.454545454545455","0","ENSMUSG00000056758"
"167","","",,,"Rdm1","false","false","Cluster 2","Clustered","8.571428571428571","0","ENSMUSG00000010362"
"165","ARCHS4 Coexpression,29;Enrichr Queries,176;GTEx Coexpression,20","DIXDC1,STMN3,IFIT3,SAMD14,CHEK2,DPYSL3,KIF21B,SCN1B,UNC5A,RBFOX3,PRKCA,MAPK8IP2,CPT1C,HPCAL4,HSPG2,MTURN,MAPK8IP1,GPR162,MAP1A,TYRO3,KCTD12,EPAS1,PDE1B,STXBP1,TTBK1,PGBD5,MAP2,B4GALNT1,HIVEP3,ST3GAL1,PPARGC1A,RAB11FIP4,JUN,DTNA,MAGEE1,PLK2,FZD9,MYO5A,NR1D1,L1CAM,PRR36,SCN2B,ITM2C,BTG2,TMEM151B,KCNC1,DIRAS1,DIRAS2,DOC2B,JPH4,PCLO,C1QTNF1,FAM102A,SH3PXD2A,CAMKV,SLC22A17,TRIM3,TIMP2,TIMP3,IDS,KIF1A,PSD,RPS6KL1,ACTL6B,PAX6,SYP,AP3B2,SYN2,SYN1,GPRC5B,MRAS,PXDN,ARHGEF4,MAPT,VAMP2,MGLL,RAPGEF4,NAPB,KCNA1,PELI3,SEZ6,CXCR4,PHYHIP,RXRA,CAMK2N1,PLAGL1,CARNS1,APBB1,CKB,GABRD,PURG,GABRA1,GABBR2,ARNT2,GSN,KCNB1,LHFPL4,NMNAT2,TUBB4A,DHRS3,GRIN1,STXBP5L,PCDHB16,TCEA2,FOSB,APBA1,YPEL3,CDK5R1,CSF1,IRS1,RORA,CELSR1,ETS1,CLU,ARHGAP44,RIMS4,SALL2,KIF5C,FCGRT,PALM,PPFIA4,FADS1,RGS7,TGM2,KCNH3,TLE2,IGFBP5,TMOD2,APLP1,TTC7B,FRMD4A,MITF,RUNDC3A,TMEM130,TANC2,CLIP3,DISP2,ACAP3,OLFM1,CACNB3,ABCG1,BRSK1,BRSK2,NDRG4,PFKFB3,ARHGEF25,HPCA,CACNA1B,ITPR1,CACNA1A,LPL,CPLX2,NDRG2,NDRG1,RAP1GAP,IGSF21,NEUROD2,PDZD4,ADGRG1,HRH3,KIF3C,NPTX1,RAB6B,PACSIN1,ASIC1,FN3K,PRNP,SYT3,FBXO32,CORO2B,GNAO1,CXCL10,NR4A3,NBEA,DLG4,REEP2,BHLHE40,MAP3K12,MXD4,SNAP25,THRA,CELF2,RASGRF1,CELF3,ARRB1,PKD1,TTC28,SYNE1,UNC80,SCRN1,MCF2L,GDAP1L1,SULT4A1,KRT222,KLF12,PIANP,CAMK1D,FAM219A,DNM1,ETV5,ARL4C,TGFBR3,PTP4A3,SETBP1,IRF1,CAMK2B,LEF1,CRMP1,THBS1,AURKB,DDN,ABLIM1,SV2A,SPOCK2,MXI1,FSD1,FBXL16,SORL1,MEIS2,MAPK11,NFASC,PIK3IP1,SYT11,FAM131A","28","75.0","Pou6f1","false","false","Cluster 2","Clustered","8.986928104575163","0","ENSMUSG00000009739"
"1186","","",,,"Asf1b","false","false","Cluster 2","Clustered","8.50909090909091","0","ENSMUSG00000005470"
"2209","","",,,"Adap1","false","false","Cluster 2","Clustered","8.761904761904763","0","ENSMUSG00000056413"
"159","","",,,"B4galnt1","false","false","Cluster 2","Clustered","10.352941176470589","0","ENSMUSG00000006731"
"158","ARCHS4 Coexpression,1313;Enrichr Queries,41;GTEx Coexpression,476","FCGBP,STEAP3,AQP8,PLAT,CELSR1,MYLK,LGALS3,EFEMP1,CHEK2,ADORA1,CYP1B1,SOX9,CHAC1,SLC25A45,FADS1,MFSD2A,IER3,ZBP1,SLC34A2,DGAT2,IGFBP5,FST,DAPK2,ACOT11,MITF,P3H3,CMBL,NPNT,PRLR,FAM227A,TERB1,PROCR,CACNB3,CLDN4,SMO,COL4A2,SOAT2,COL4A1,RBP1,GPD1,LGALS12,MALL,NUPR1,SLC27A5,ENPEP,MAOB,ARX,SLC1A1,ABHD1,CACNA1A,LPL,FBXO48,KLHL13,RASGRP3,ADGRG4,CALHM2,SCIN,KCNQ1OT1,GALR1,PDGFC,HMOX1,TSPAN2,RAI2,PRNP,TGFB2,SLC14A2,GSDMA,ATP8B2,FZD4,EPHX2,IGF2,FZD9,SSC5D,RASSF9,BTNL2,NR1D1,CIDEC,CXCL10,IRAK1BP1,COL1A2,TMEM236,KLHDC8A,MYO5B,CYP2S1,BHLHE40,ZBTB8B,PCDHB7,MOXD1,TRIM72,NRP2,BTG2,MOGAT2,TGFB1I1,SLC2A1,KRT23,LAMC2,SLC7A11,MSLN,TTC28,C1QTNF1,HNF4A,BOC,TIMP3,QSOX1,SLC37A3,ABCD1,EDN1,FGFBP1,TGIF2,MME,TRPC4,TRPC1,PLAUR,APOA1,REXO2,WDR35,KLF15,PTGR2,ACTA2,RAD51B,ANO1,PTP4A3,SLC7A8,BDH1,RILPL1,COL6A1,KCNMA1,PXDN,ALDH1A1,PDZRN3,MGLL,MATN2,ITIH5,PLEKHH2,TAGLN,SLC47A1,RGS16,FGL2,ZDHHC24,PTGS2,THBS1,AURKB,SLC7A3,SELENBP1,RASD1,CAMK2N1,RAB23,TCEAL1,FLNA,E2F2,MAL2,XDH,JAZF1,MPZL2,IL33,CGREF1,CDKN2B,GSN,LHFPL5,CYP4B1,PRSS35,MEIS3,FMO4,MEIS2,SULF2,COL3A1,SPSB1,KRT18,PCDHB16,FOSB,RAMP1","670","610.0","Tcf23","false","false","Cluster 2","Clustered","9.544117647058824","0","ENSMUSG00000006642"
"1182","","",,,"Lbr","false","false","Cluster 2","Clustered","8.454545454545455","0","ENSMUSG00000004880"
"2203","","",,,"Kbtbd11","false","false","Cluster 2","Clustered","9.625","0","ENSMUSG00000055675"
"2200","","",,,"Zcchc24","false","false","Cluster 2","Clustered","9.625","0","ENSMUSG00000055538"
"2199","","",,,"Epm2a","false","false","Cluster 2","Clustered","8.50909090909091","0","ENSMUSG00000055493"
"150","","",,,"Reep5","false","false","Cluster 2","Clustered","10.129870129870131","0","ENSMUSG00000005873"
"149","","",,,"Mrvi1","false","false","Cluster 2","Clustered","9.808333333333334","0","ENSMUSG00000005611"
"148","","",,,"Hmox1","false","false","Cluster 2","Clustered","9.706666666666667","0","ENSMUSG00000005413"
"2194","","",,,"Anxa13","false","false","Cluster 2","Clustered","10.032967032967033","0","ENSMUSG00000055114"
"146","","",,,"Fgfr4","false","false","Cluster 2","Clustered","8.761904761904763","0","ENSMUSG00000005320"
"1168","","",,,"Prkar2b","false","false","Cluster 2","Clustered","9.230769230769232","0","ENSMUSG00000002997"
"2192","","",,,"Nt5c1a","false","false","Cluster 2","Clustered","8.836363636363636","0","ENSMUSG00000054958"
"144","","",,,"Hspb1","false","false","Cluster 2","Clustered","10.035087719298247","0","ENSMUSG00000004951"
"2191","","",,,"Afp","false","false","Cluster 2","Clustered","8.761904761904763","0","ENSMUSG00000054932"
"143","","",,,"Mapk13","false","false","Cluster 2","Clustered","8.666666666666668","0","ENSMUSG00000004864"
"2190","","",,,"Klhl5","false","false","Cluster 2","Clustered","9.964912280701753","0","ENSMUSG00000054920"
"140","ARCHS4 Coexpression,1177;Enrichr Queries,343;GTEx Coexpression,136","SPARC,GPR68,GALNT18,DIXDC1,RORA,CELSR1,ETS1,CLU,SLC8A1,MYLK,ICAM1,SYDE2,SLC25A48,GJA1,PLAU,RPS6KA2,DPYSL3,SCMH1,CYP1B1,KIF21B,SOX9,SLC25A45,FADS1,TGM2,EPHA7,SEMA6A,PAQR7,IGFBP5,RBFOX3,SEMA6D,STARD9,KNL1,HSPG2,EML1,SELENOM,COL4A2,IFI27,COL4A1,DMWD,LGALS12,HOXB4,S100A6,KCNQ4,HOXB3,MXRA7,NUPR1,PLPP3,MYL9,PFKFB3,ARHGEF25,MAOA,EPAS1,MGST1,PLD5,CACNA1A,LPL,FBLN1,CACNA1C,NDRG2,FBLN2,ACACB,CACNA1H,NEUROD2,SCUBE1,INPP5A,SCIN,CALD1,PPARGC1A,RAI2,PLXNA4,GPR17,CRTAP,JUN,DTNA,OSBPL5,RBPMS,ATP8B2,MCAM,FN1,IGF2,FZD9,HMGA1,KLHL23,EHD2,BMP3,SDK1,CXCL10,COL1A2,BHLHE40,PDE3A,MRVI1,FERMT2,CDKN1C,COL18A1,NRP2,BTG2,TGFB1I1,CELF2,HSPB8,SLC2A1,ADM,SLC7A11,TTC28,ADAMTSL4,TIMP3,RNF150,KIF1A,ZCCHC24,SUN2,MME,TRPC1,TNFRSF18,KLF15,PARD3B,TGFBR3,ACTA2,PTP4A3,GFOD1,KCNMA1,PXDN,KIT,ALDH1A1,ITGA7,PLEKHO1,PDE5A,PAFAH1B3,PDZRN3,CRYAB,RBMS3,ITIH5,LAMA5,TAGLN,CCDC69,PRUNE2,FAM129A,CXCR4,SEMA3E,THBS1,NKD1,AURKB,CST3,NEURL1B,TCEAL1,NT5DC3,SLIT1,BPNT1,FLNC,XDH,AAMDC,RUNX1T1,IL33,SLC12A4,EGLN3,GSN,PLCL1,CCDC58,CYP4B1,SORBS2,ARID3A,MERTK,FMO4,ADGRD1,COL3A1,STK17B,MSRB3,FOSB,OCIAD2","595","552.0","Hif3a","false","false","Cluster 2","Clustered","8.571428571428571","0","ENSMUSG00000004328"
"139","","",,,"Lpcat3","false","false","Cluster 2","Clustered","9.625","0","ENSMUSG00000004270"
"138","","",,,"Ptrf","false","false","Cluster 2","Clustered","9.894736842105264","0","ENSMUSG00000004044"
"136","ARCHS4 Coexpression,654;Enrichr Queries,468;GTEx Coexpression,640","IFITM1,CD83,SPARC,ANKRD13D,NRROS,FAM89A,PLAT,ENO1,ETS1,CLU,IFIT3,ICAM1,LGALS3,GJA1,TUBB6,PLAU,BASP1,NAMPT,LONP1,CYP1B1,LIPK,SOX9,MFSD2A,IER3,TGM2,TSPYL2,MYLIP,CD93,RSAD2,IGFBP5,FST,ARID5A,FRMD4A,ATP11A,ERN1,SELENOP,S100A6,RIN3,VDAC1,NUPR1,PLPP3,PFKFB3,AKNA,NPR1,EPAS1,INSIG1,LPL,APCDD1,NDRG1,ADAMTS15,LDHB,KLC3,HMOX1,FAM43A,H1FX,RREB1,FAM83B,WNT3,SLC19A2,PRNP,JUN,GSTM2,TIPARP,GFPT2,PLK2,CIDEA,FN1,NFATC2,NBEAL2,NR1D1,GADD45G,FOSL1,ISG20,CCDC88B,CXCL10,PTPRE,BMP2,NR4A3,COL1A2,GJB4,LYPD6B,BHLHE40,ID4,ITM2C,BTG2,PHF1,SLC2A1,ATP2A3,HSPB1,NRARP,ADM,CXCL1,SLC7A11,NKPD1,HEBP2,TUBA1A,ADGRE5,BOC,BDKRB2,TIMP3,EMB,HIST1H1C,SUN2,EDN1,ANXA1,TNFRSF12A,ANXA3,PGAM1,TNFRSF19,PLAUR,GPBAR1,TMC8,VPS37B,TMEM173,ARL4C,ACTA2,TGFBR3,PTP4A3,DCT,PIGA,CDHR1,IRF1,PXDN,ALDH1A1,CD302,CRYAB,TAGLN,TUFT1,RGS16,CXCR4,NLRC3,PTGS2,THBS1,AURKB,RASD1,RNF39,SPTSSB,D2HGDH,GSN,KRT10,PTPN13,COL3A1,HSPA1B","643","587.3","Fosb","false","false","Cluster 2","Clustered","9.284606866002214","0","ENSMUSG00000003545"
"135","","",,,"Ier3","false","false","Cluster 2","Clustered","8.666666666666668","0","ENSMUSG00000003541"
"133","","",,,"Fcgrt","false","false","Cluster 2","Clustered","9.418300653594772","0","ENSMUSG00000003420"
"2181","","",,,"Ffar4","false","false","Cluster 2","Clustered","9.696969696969697","0","ENSMUSG00000054200"
"131","","",,,"Tbc1d8","false","false","Cluster 2","Clustered","8.761904761904763","0","ENSMUSG00000003134"
"2176","","",,,"Slc51b","false","false","Cluster 2","Clustered","8.952380952380953","0","ENSMUSG00000053862"
"2175","","",,,"Sh3pxd2a","false","false","Cluster 2","Clustered","9.808333333333334","0","ENSMUSG00000053617"
"2174","","",,,"Rpia","false","false","Cluster 2","Clustered","10.274725274725276","0","ENSMUSG00000053604"
"1150","","",,,"Cyp51","false","false","Cluster 2","Clustered","10.032967032967033","0","ENSMUSG00000001467"
"2173","","",,,"Zfand2a","false","false","Cluster 2","Clustered","8.836363636363636","0","ENSMUSG00000053581"
"124","","",,,"Col18a1","false","false","Cluster 2","Clustered","8.836363636363636","0","ENSMUSG00000001435"
"119","","",,,"Itga5","false","false","Cluster 2","Clustered","9.716666666666667","0","ENSMUSG00000000555"
"2164","","",,,"Serp2","false","false","Cluster 2","Clustered","9.010989010989011","0","ENSMUSG00000052584"
"1139","","",,,"Il12rb1","false","false","Cluster 2","Clustered","9.35897435897436","0","ENSMUSG00000000791"
"115","","",,,"Wnt9a","false","false","Cluster 2","Clustered","9.544117647058824","0","ENSMUSG00000000126"
"2162","","",,,"Nrros","false","false","Cluster 2","Clustered","9.010989010989011","0","ENSMUSG00000052384"
"114","","",,,"Narf","false","false","Cluster 2","Clustered","10.5","0","ENSMUSG00000000056"
"1138","","",,,"Icosl","false","false","Cluster 2","Clustered","8.454545454545455","0","ENSMUSG00000000732"
"1137","","",,,"Haao","false","false","Cluster 2","Clustered","8.50909090909091","0","ENSMUSG00000000673"
"2160","","",,,"Cemip","false","false","Cluster 2","Clustered","8.583333333333332","0","ENSMUSG00000052353"
"108","ARCHS4 Coexpression,278;Enrichr Queries,459;GTEx Coexpression,661","NRROS,CD83,CSF1,GFI1,GIMAP1,LY75,RORA,JADE2,NR3C1,CELSR1,MKI67,GIMAP6,ETS1,SLC8A1,GIMAP8,ICAM1,ZC3H12D,LGALS3,PLAU,RASSF5,CHEK2,PLXNC1,SOX9,TGM2,IER3,ZBP1,PPP1R16B,PRKCH,IGFBP5,ARID5A,CYBB,PRKCA,SYTL3,GPRIN3,ERN1,RNF125,COL4A2,TEP1,COL4A1,RAB37,MFNG,GSAP,RIN3,KCTD12,TNIK,PLPP3,CARD11,PFN2,AKNA,PFKFB3,ARL6,EPAS1,CACNA1A,NDRG1,ADGRG1,CHST12,HMOX1,TNFRSF14,HIVEP3,PRNP,JUN,TGFB2,CARMIL2,ATP8B2,FAM78A,PLK2,FN1,CRIM1,MSN,NBEAL2,FBXO32,ISG20,CCDC88B,CXCL10,BMP2,PTPRC,NR4A3,BHLHE40,ITM2C,DENND1C,BTG2,SH3KBP1,CELF2,PLEK,ATP2A3,SLC2A1,ITGAL,RCSD1,SYNE3,LIMD2,SYNE1,PSTPIP1,DUSP10,FAM102A,ADGRE5,SH3PXD2A,TIMP3,ITGB7,EMB,CD53,SUN2,CNOT6L,CAMK1D,MYOF,PLAUR,TMC8,PARP8,ARL4C,TGFBR3,APBB1IP,HSH2D,PTP4A3,RASA3,LCK,IRF1,PXDN,KIT,KCNMA1,EVL,MGLL,ARHGEF6,RGS16,CCDC69,LEF1,FAM129A,CXCR4,NLRC3,PTGS2,THBS1,AURKB,FAM117A,FGD2,FGD3,ABLIM1,SH3BP1,SPOCK2,UCP2,FYN,IL12RB1,GSN,PLEKHA2,SORL1,DHRS3,SULF2,STK17B,FOSB,TRIM38,CD244","470","466.0","Nfatc2","false","false","Cluster 2","Clustered","8.611764705882354","0","ENSMUSG00000027544"
"107","","",,,"Arrb1","false","false","Cluster 2","Clustered","8.666666666666668","0","ENSMUSG00000018909"
"106","ARCHS4 Coexpression,300;Enrichr Queries,386;ReMap ChIP-seq,113;GTEx Coexpression,180","VIPR1,PANK3,MT-ND5,AQP8,STMN3,ENO1,ABCA12,NADSYN1,SLC4A4,AQP3,CLDN1,TSKU,TMEM92,ICAM1,LGALS3,FRAT2,CREB3L4,CHEK2,MYB,RASSF6,LONP1,PIP4K2A,CYP1B1,SOX9,MS4A10,MNX1,EPHA4,STARD4,UNC5A,IL1R1,CTRB1,ALG2,KCNK16,BHLHA15,PDZK1,CMBL,SLC51A,PRAP1,GCAT,CLPS,CLDN9,RBP1,KCTD14,PLPP3,CFTR,PTGES,IGSF3,EPAS1,STXBP1,CFI,MTTP,PLA2G3,PIK3R3,LDHA,CRACR2B,CHST12,TTPA,RDH16,S100A14,KCNN4,S100A11,SPTBN2,BBS1,JUN,FZD7,SLC33A1,EIF2AK3,SLC16A12,FN1,PYCR1,PTK6,BRI3BP,A1CF,FA2H,GJB1,MYO5C,SPATS2L,COL9A3,ZBTB8B,TECPR1,FKBP11,MESP2,COL18A1,BTG2,KCNC1,MOGAT2,TCF23,ICA1,HNF4G,ADM,HIF3A,TFCP2L1,HERPUD1,ROBO1,IMPA2,ADAMTSL4,HNF4A,TIMP3,SEC61B,TMED6,EDN1,MME,PRSS16,PAX6,SLC35G1,PROX1,SLC39A14,TMEM150C,AP3B2,VAV1,BACE1,UGDH,PXDN,KIT,KCNMA1,RGN,TFF2,ALDOB,CHST4,RAPGEF5,ALDOA,PLPPR2,HAAO,TMPRSS3,NR1I3,SLC43A1,AMIGO2,NR1I2,FAM129A,AKAP7,CXCR4,PTGS2,CENPA,CRIP1,FAM129B,TM4SF20,SPTSSB,CAP2,RUNX1T1,LRRC26,EGLN3,BIK,PTGES2,LHFPL5,GCG,FMO4,FMO5,GUCA2A,SULF2,AGMAT,ALDH4A1,DHRS7,KRT18,AADAC,KCNS3,KIF26B,GSTA1,B9D2,SLC28A2,NUCB2,FOXA3,YPEL3,FOXA1,KLB,STEAP3,ANKRD13D,ANKRD35,ZWILCH,IRS1,RAB3D,GUCA1A,RORA,NR3C1,CELSR1,CLU,ETS1,HID1,SYDE2,DEPTOR,DACH1,ARHGAP40,PLAU,FAM3B,CHP2,SLC25A45,RGS9,FADS1,TGM2,PLS1,SPINK4,CPA2,UNC5CL,SCARA3,SLC15A1,SPINK1,KIRREL2,SEMA6A,G6PC,IGFBP5,SLC30A2,FST,SEMA6D,WNT5A,IGFBP2,TTC7B,OLFM4,PRLR,TANC2,ERN1,CACNB3,SELENOM,DOK3,MYCN,RAB36,SIDT1,NUPR1,SLC27A5,KANK3,ABCG2,REG3A,SHC2,PFKFB3,PLGRKT,GPR119,UBA5,INSIG1,SLC1A1,ABHD8,MRO,FUT2,FUT1,ACACB,NPAS2,RASGRP3,CALHM2,FAM83B,FDPS,PRNP,TGFB2,ACBD4,VDR,TGFB3,HMGA1,HMGA2,INHBB,EFNA1,QDPR,CXCL10,DAP,EFNA3,REEP5,TMEM236,BHLHE40,MDM2,PYROXD2,DHCR7,RNF186,PNLIPRP1,PNLIPRP2,RNF11,THRB,THRA,PSCA,TREH,CELF2,CELF3,SLC2A2,ARRB1,LAMC2,PIK3C2B,MFSD9,ALDH2,ACP6,BDKRB2,ITGB7,SLC37A4,BCAS1,KLF12,TGIF2,KSR1,LIX1L,APOA1,APOA4,ETV1,SSTR3,BET1L,DNAJC3,TGFBR3,PTP4A3,PKM,MEP1A,IRF1,CRY2,ASPG,EVL,ACPP,ACSS2,SLC47A1,SEMA3C,PLA2G1B,TUFT1,MSLNL,LEF1,SLC3A1,HSD17B13,SEMA3F,TFPI,THBS1,THSD4,AURKB,SELENBP1,MROH1,ATOH8,SLITRK6,DNAJB9,HES1,SLIT2,ACSS1,BNIP3,KCNIP3,PDX1,APOC3,SORL1,MEIS2,TTC39A,FRAS1,XPNPEP1,SYT12,SARDH,PPP1R14D,KCNK2","158","244.8","Nr5a2","false","false","Cluster 2","Clustered","10.342741935483872","0","ENSMUSG00000026398"
"1130","","",,,"Wnt3","false","false","Cluster 2","Clustered","8.672727272727272","0","ENSMUSG00000000125"
"1129","","",,,"Ngfr","false","false","Cluster 2","Clustered","8.590909090909092","0","ENSMUSG00000000120"
"2152","","",,,"Tlr6","false","false","Cluster 2","Clustered","8.791208791208792","0","ENSMUSG00000051498"
"103","","",,,"Lyz1","false","false","Cluster 2","Clustered","8.454545454545455","0","ENSMUSG00000069515"
"99","Literature ChIP-seq,27;ARCHS4 Coexpression,422;Enrichr Queries,218;ReMap ChIP-seq,207;GTEx Coexpression,876","MT-ND5,CHIC1,TSKU,PTPDC1,MYLK,ZC3H12C,DPYSL5,DPYSL3,LIPG,MNX1,XYLB,WLS,CACNA2D1,STARD9,DHDH,HSPG2,EML6,RBP2,UQCRC2,MYL9,HPD,ABCB6,SLCO5A1,SLC5A1,ABCB9,CYB5R2,DYNC2LI1,CYB5R3,PRKAR2B,KCNQ1OT1,PDGFC,ADAMTS17,GRPEL2,RHBDL3,PPARGC1A,PPARGC1B,ZBTB7C,JAG2,GSTM4,MYH7B,JUN,TIPARP,FN1,EIF2AK3,ERLIN1,FXYD3,AGO4,LYPD6B,ZBTB8B,ARHGAP8,PRKAG2,PEAR1,JPH1,MMP20,OSBPL10,SHF,SULT1C2,SHH,TUBA1B,TMEM44,EFCAB1,DLGAP4,DUSP3,PGAM1,MYOF,ROM1,ELOVL6,WNT9A,F2,SLC39A14,GPRC5B,SLC7A7,SLC7A8,BDH1,MMP15,OAF,RILPL1,PXDN,CDC42EP3,MMP17,DPYD,ADSSL1,CKS2,SMTNL2,PPARA,KANK1,ECHS1,OAT,PKN3,PTAFR,COL11A2,SEZ6,SNX32,SNX33,PTGS2,CENPA,FAM117B,FSTL4,TMEM71,EGLN1,LRRC26,SLC16A1,BIK,KCNB1,TMCO4,STXBP5L,TTLL7,SPSB2,SPSB1,SNX16,SLCO3A1,LYRM7,CENPM,YPEL3,FRYL,NRROS,OLFML2B,GPR68,NAB2,FAM13A,RORA,FRY,FBXO21,CXCL13,MYLK3,FADS3,FADS2,EFEMP2,EFEMP1,SESN1,SCMH1,SLC16A6,TNFRSF8,PIM2,SH2D5,FADS1,EPM2A,BNIP3L,KCNH3,MYLIP,PCYT2,DGAT2,ZBTB38,ATP11A,NEAT1,FBXO10,MYT1,SLC9A3,ACAP3,MAL,SQSTM1,SLC27A5,SHC4,BLM,PFKFB3,KHDRBS3,ARL6,CREM,GMPR,RAP1GAP,NPAS2,SNN,TKFC,PMVK,TNFRSF14,TMEM120B,SDF2L1,RBPMS,RASL10B,HPS4,ZBTB10,FBXO32,CORO2B,CXCL10,MFHAS1,DMXL2,NFE2L3,MIPEP,TRIM72,MOXD1,PIWIL4,ITGAM,ITGB5,MTCL1,LEAP2,CELF2,FHL1,AKAP8L,RASGRF1,APIP,ETFA,ARRB1,NRARP,ELFN1,NKPD1,UNC80,DDI2,ACP5,UPP1,ERC2,TRIM67,BOK,BCAS1,SLC36A1,TRIM62,TNFRSF19,VPS37B,ADORA2A,ITGA7,GAPDH,SLC25A13,ITGA9,PRKAA2,SRL,CXXC5,CECR2,SLC25A29,TRIM47,FYN,IGF2BP3,D2HGDH,IGF2BP2,E2F8,MARCKSL1,SYT14,SYT13,MERTK,MCOLN2,TTC39A,BAIAP3,MYO1D,TRIM38,MYO1H,CD244,SLC23A3,SPON2,AHCYL2,LDLRAD3,ICAM1,LGALS3,OPHN1,SLC12A8,MFSD2A,EPHB3,EPHA5,EPHA4,PAQR4,LIMCH1,ADGRA3,MIF,MFSD11,IFI27,PPP1R3B,KCTD14,RIN3,MXRA7,KCTD12,KCTD17,NUMBL,NRN1,EPB42,EPAS1,CAPSL,PIK3R3,NEU3,PGBD5,PCBP4,SLAMF9,TSPAN4,HIVEP3,SNX9,KCNN4,SNX8,RAB11FIP4,TMEM86A,REG4,RAB27A,MYO5A,DCLK2,PTK6,FER1L6,MSRA,PEX5L,MYO5B,WNK2,ECHDC1,COL9A3,RGL1,CD200,NRP2,ACY1,PTPRN,DIRAS1,ICA1,PTPRM,SLC7A11,PTPRH,CLYBL,KHK,HERPUD1,CTSL,CTSK,HNF4A,KIF1A,CTSF,LMCD1,MRPS27,TMEM150A,MME,ANO8,ANO9,ANO6,TMEM150C,ENAH,ANO1,KCNU1,KIT,SYNC,PDZRN3,FJX1,CD63,SLC43A3,PVT1,SLC43A1,GREB1L,CAPG,GNAI1,RXRA,HSF2,CAP2,GABBR2,PLEKHA2,ALDH4A1,TTC8,RIT1,KLHL5,CSDC2,KLHL7,KCNS3,STK17B,PCDHB16,TCEA2,CD68,MAMLD1,RAMP1,SPC24,SCARB1,NARF,CD83,GDA,KLHL32,LOXL4,CPOX,PLAT,JADE2,GXYLT2,NR3C1,CELSR1,ETS1,CARF,CELSR3,PLB1,PLAU,CAPN2,RGS9,TGM2,RGS7,ZBP1,SLC30A2,ACOT11,TTC7B,SDHC,SDHB,MID1,TANC2,PDGFRL,GPRIN3,DOK3,GPRIN1,TBC1D24,SIDT1,PLD5,PROZ,CACNA1A,SLC1A3,PLD1,NDRG1,CACNA1H,ACACA,RASGRP3,ADGRG1,CCNB1,CALD1,ADGRG6,TBC1D14,KIF3C,CYC1,COX10,MFAP3L,PACSIN1,SYT5,PRNP,CRTAP,CCDC136,HMGA1,CRIM1,HMGA2,MSN,SYT8,INHBC,BMP6,QDPR,GNAO1,ISG20,AHI1,SDK1,FGF14,GNAL,PQLC1,UBXN11,BHLHE40,NABP1,AMOTL2,PYROXD2,AMOTL1,DNAL1,GALK1,PRR5,PNLIPRP2,PODXL2,TREH,LDB3,DMKN,SOBP,PITPNC1,TTC28,SCARF2,DACT1,TGIF2,ATP6AP1,TBC1D8,ETV1,MASTL,GPCPD1,ETV4,SPIDR,ETV5,TBC1D2,VGF,SETBP1,CAT,ATP6V1B2,NDUFS2,RBM20,SHANK2,LAMA5,PLA2G1B,LAMA3,SLC3A1,RSPH9,ADD3,CLN6,AURKB,ASB16,AGPAT4,GNG2,SH3TC2,GNG4,POLD1,SPOCK2,MXI1,POLD2,MVB12B,ATOH8,SLIT1,SLIT2,CRYM,CHGA,FAHD1,BNIP3,MAPK12,MAPK13,RPIA,ADGRD1,FAM131A,GALM,ASB4,CHPT1,SNTB1,MAML2,MSANTD3,ENO1,SLC4A4,FGFRL1,ELK3,GLS,GJA1,CREB3L3,NAMPT,AP1S2,CYP1B1,PLCE1,PIP4K2A,NCKAP5,HOXA5,IER3,CHGB,GPR179,GAMT,TSPYL2,PRKCH,DNAAF3,DAPK1,DNAAF1,PRKCA,HOGA1,DKK3,SYTL2,ZC2HC1C,CLPS,WDR81,MAP1B,LGALS12,TYRO3,ASF1B,LIPT1,FAM149A,LDHA,ST3GAL4,HMOX1,ST3GAL1,RREB1,SLC19A1,LHPP,SLC19A2,CDK17,GSDMA,FZD4,PLK2,MCAM,FZD7,PLK1,NFATC3,NFATC2,RMDN2,SLC16A10,NR1D1,GPR137B,FOSL1,GJB1,SLC6A9,CYP1A1,PHF1,ADM,PYGL,ABCC12,SLC6A3,SLC6A4,TMEM189,C1QTNF1,CSRP2,FAM102A,TRIM3,TIMP2,TIMP3,GAST,TEAD4,NDC1,TPI1,ANXA1,SLC2A10,ANXA5,DENND2A,ITPK1,COPZ2,ELMOD3,PRSS16,SERPINB9,WDR35,BACE2,TUBB2A,PLCB4,ANGPTL6,KIFC3,PLEKHO2,TKT,GAS6,PLCB1,MGLL,PHLPP1,NR1I2,PRUNE2,FAM129A,GRAMD4,TMEM163,FGD1,FAM129B,SC5D,GCNT4,AGA,RNF130,RUNX1T1,GPR157,AOC1,GSN,GSR,WWP1,GPR4,NMNAT2,TUBB4A,DHRS3,AGT,DHRS4,SULF2,OSTM1,CLCF1,FOSB,COQ8A,SLC28A1,TMEM229B,RAB3C,ANKRD37,CSF1,ANKRD35,IRS1,TUSC3,CLU,SLC8A1,DEPTOR,DACH1,LAMP2,SLC39A6,PLXNC1,LZTS1,HMGN3,SEMA6B,SLC15A1,IGFBP5,SEMA6D,CSGALNACT2,MAGI2,FRMD4A,MITF,RAB30,OBSCN,DMWD,MADD,TNIK,PHLDB2,BRSK2,INSIG1,ITPR1,ITPR2,VTCN1,RLF,IGFBP7,SRGAP1,RAB6B,PLXNA4,FN3K,OSBPL5,ATP8B2,ADAP1,DAB1,NBEA,SPIRE1,MAFK,REEP6,RNF186,TUBA8,MAP3K12,PSCA,CPQ,SYNE2,PIK3C2B,SCRN1,IDH3B,WDR6,LBR,SLC37A3,PLEKHG3,PLA2G12A,PLEKHG1,SGIP1,DUSP22,PTP4A3,TFDP2,ALDH9A1,CRP,PLEKHH2,SEMA3C,BPHL,AP3M2,DCAF17,ABLIM1,ABLIM2,NHS,RNF39,BCO1,ACSS1,STOX1,CACNG4,JAZF1,KCNJ11,RNF24,SMOX,MACC1,KCNIP3,IRX4,KCNJ16,FBXL16,CPPED1,KLF7,NFASC,DNAJA4,PFKP,SPARC,PANK3,FAM89B,PANK1,CBLB,IFIT3,SYNPR,FRAT2,CHEK2,RPS6KA2,LONP1,DAG1,DPF3,SOX9,CHAC1,HABP2,SLC6A19,SLC11A2,ACSL3,CPT1C,OVOL2,CYP27A1,CYP2U1,RRAGB,HSBP1L1,MALL,RRAGD,GSAP,VDAC1,ATP6V0D1,PLPP3,NBL1,CFTR,PFN2,MACF1,IGSF3,STXBP1,TSHZ2,EIF5A2,C2CD4C,APCDD1,MAP2,FAM43A,TRAP1,PTPRN2,SLC35E4,TREX2,SLC33A1,PYCR1,CIDEC,NCEH1,PDE3A,SPATS2L,ITM2C,CLIC5,COL18A1,TENM4,SH3KBP1,GBE1,ZFAND2A,CITED4,KRT23,SLC35F1,ROBO1,LIMD2,SERP2,GYS1,SH3PXD2A,DNER,TMED6,ATP6V0B,PACRG,TMED8,PRMT2,SLC35G2,GFRA3,CBFA2T3,RENBP,VAV1,ZDHHC14,PALD1,PARP8,RAD51B,UGDH,MAPT,ALDOA,SDCCAG8,CXCR4,VWCE,PHYHIP,SCEL,PDPR,SH3BGR,AAMDC,EMC9,CBR3,GDF11,ARNT2,PTGES2,SUSD2,FAM189A1,SORBS2,GRHL3,LHFPL2,SORBS3,TPPP3,HIST3H2A,QPCT,APBA1,CDK5R1,CNDP1,TMEM143,SYDE2,SCGN,CHCHD3,FAM162A,COTL1,HADH,PDE8A,GAS2L3,ABCG5,ANXA13,SHISA2,PDIA5,DCTD,COL4A2,FAM185A,SELENOP,SCG5,NUPR1,LMX1B,CTTNBP2,LPL,ARHGAP18,FBLN2,SCUBE1,SCIN,DPP7,HRH3,NLRP6,UAP1L1,MYH10,KLHDC2,TGFB2,CBX6,ACBD4,TRPV2,TRPV3,ARHGAP24,ACSF2,ARHGAP23,SLC2A9,EFNA3,PLCXD3,DAO,AMACR,NR4A3,DLG4,FAM187B,CRYL1,FGFR4,LRP11,GPSM2,ACADVL,DOCK4,THRB,THRA,HSPB8,SLC2A1,HSPB1,DBI,YBX2,SLC2A4,HK2,SPRED3,FLCN,DBP,ALDH2,MCF2L,ABCD1,ABCC4,KLF12,H2AFV,IQCD,MYRIP,LSS,KLF15,UPK3A,TGFBR3,FGR,DCT,RASA3,EHHADH,ALDH1A1,RBMS1,RBMS3,RGS17,HLF,RGS14,LEF1,ATP1A1,TFPI,THBS1,NCALD,DLL3,HSPD1,RASD2,ALDH1B1,GNA11,NT5DC3,KLRG2,STOM,HES1,LRIG3,NCAM2,MAPK4,MUTYH,CMTM3,CADPS,ARID3A,MEIS2,FMNL2,XPNPEP1,PIK3IP1","287","350.0","Mitf","false","false","Cluster 2","Clustered","10.399999999999999","0","ENSMUSG00000035158"
"2147","","",,,"Ffar2","false","false","Cluster 2","Clustered","8.50909090909091","0","ENSMUSG00000051314"
"1122","","",,,"Akr1b7","false","false","Cluster 2","Clustered","8.857142857142858","0","ENSMUSG00000052131"
"2145","","",,,"Fam174a","false","false","Cluster 2","Clustered","9.230769230769232","0","ENSMUSG00000051185"
"1121","ARCHS4 Coexpression,719;Enrichr Queries,24;GTEx Coexpression,55","ALDH1L1,EXOC3L4,PANK1,GLDC,GOLT1A,IRS1,ACSM5,CELSR1,FADS2,GRB14,CREB3L3,SLC25A45,XYLB,HABP2,FADS1,MFSD2A,ABCG5,G6PC,DGAT2,SERPINF2,IGFBP2,DIO1,ACOT12,PIPOX,TM4SF4,CMBL,SLC51A,HOGA1,PRAP1,FAM227A,CYP27A1,GLTPD2,RBP4,PPP1R3C,TFR2,SOAT2,PPP1R3B,GPD1,CYP2E1,IGFALS,HPD,SLC27A2,SLC27A5,ACOT4,ABCG2,ENPEP,MAOB,EPAS1,SHMT1,CFI,SLC22A1,ABHD1,PROZ,LPL,SLC30A10,ADH4,KLC3,NPC1L1,AGMO,TTPA,RDH16,HMOX1,PPARGC1A,PRNP,JUN,EPHX2,FN1,NR1D1,NR0B2,A1CF,INHBC,CIDEC,SLC16A13,EFNA1,GRHPR,MLXIPL,CXCL10,GJB1,NAT8,VNN1,CPS1,BHLHE40,CYP1A1,REEP6,ZBTB8B,ITM2C,PIGR,LEAP2,LECT2,TCF23,SLC2A2,SLC2A5,KHK,TMEM220,NADK2,C1QTNF1,HNF4A,SLC37A4,PLA2G12B,MME,APOA1,APOA4,ELOVL6,PROX1,F2,PRODH2,GCHFR,DEPDC7,PTP4A3,PKM,BDH1,RILPL1,EHHADH,CAT,ALDH1A1,RGN,ANG,ALDOB,PPARA,FBP1,MGLL,SLC25A13,RAPGEF4,CEBPA,SLC47A1,HAAO,RGS16,NR1I2,AKR1D1,AFM,HSD17B13,HSD17B6,AFP,PTGS2,AURKB,SLC17A9,ALDH1B1,ASPDH,PKLR,F10,GLYCTK,APOC3,FMO1,FMO4,FMO5,SGPP2,ETNPPL,FABP1,KRT18,CFHR2,AADAC,TMEM56,PCDHB16,SARDH,NAGS,SLC28A1,FOXA3,OTC","182","266.0","Nr1i3","false","false","Cluster 2","Clustered","9.952380952380953","0","ENSMUSG00000005677"
"1120","","",,,"Zfp945","false","false","Cluster 2","Clustered","9.716666666666667","0","ENSMUSG00000059142"
"1117","","",,,"Wnt9b","false","false","Cluster 2","Clustered","9.230769230769232","0","ENSMUSG00000018486"
"92","","",,,"Fabp1","false","false","Cluster 2","Clustered","9.9","0","ENSMUSG00000054422"
"1113","","",,,"Pklr","false","false","Cluster 2","Clustered","8.571428571428571","0","ENSMUSG00000041237"
"2134","","",,,"Tmem220","false","false","Cluster 2","Clustered","9.625","0","ENSMUSG00000050270"
"2133","ARCHS4 Coexpression,556;Enrichr Queries,1000;GTEx Coexpression,1193","MDC1,PRDM9,GUCA1A,BUB1B,CIB2,RORA,CELSR1,MKI67,ETS1,TSKU,CELSR3,CHCHD3,SALL2,CHEK2,CCDC96,LONP1,SKP2,FADS1,KCNH2,EPHA4,PCYT2,SEMA6A,COX6B2,TERB1,MYCN,HOXB9,MAP1B,ANKS6,PLPP3,TSPYL5,MACF1,PFKFB3,EPAS1,INSIG1,HMMR,PLCXD1,NDRG1,SNN,HMOX1,MORC1,RREB1,MYH10,RAB11FIP5,GSTM3,PRNP,TRAP1,JUN,FZD5,CCDC136,PLK1,FN1,ZBTB10,HMGA1,FZD9,HMGA2,PYCR1,TDRD1,TPX2,MEX3B,BHLHE40,SP6,AMOTL2,ITM2C,PHF19,PIWIL2,BTG2,HMGB2,SLC2A1,YBX2,KIF11,LMNB1,SH3PXD2A,ADAMTSL4,RAC3,TEAD4,IZUMO4,TGIF2,KSR1,KIF24,IQCD,SYNGR4,ETV5,CCNA2,PTP4A3,ESPL1,ZPBP2,PXDN,DTL,DBN1,RNF32,CEBPA,PKN3,THBS1,AURKB,HSPD1,AURKA,CECR2,POLD1,KLRG2,RAD54L,IGF2BP3,IGF2BP2,CHML,BUB1,MARCKSL1,SLC16A1,PKLR,ARID3A,TICRR,WEE2","1059","916.3","Hic2","false","false","Cluster 2","Clustered","9.35897435897436","0","ENSMUSG00000050240"
"83","","",,,"Nr0b2","false","false","Cluster 2","Clustered","9.32","0","ENSMUSG00000037583"
"2131","","",,,"Agmo","false","false","Cluster 2","Clustered","8.454545454545455","0","ENSMUSG00000050103"
"1106","","",,,"Fry","false","false","Cluster 2","Clustered","10.395604395604396","0","ENSMUSG00000056602"
"81","Literature ChIP-seq,26;ARCHS4 Coexpression,69;ENCODE ChIP-seq,7;Enrichr Queries,419;ReMap ChIP-seq,28;GTEx Coexpression,7","MT-ND5,SCT,AVIL,TMEM94,TESK2,CLDN2,CLDN1,TSKU,MYLK,ZC3H12D,LIPE,SAMD14,DPYSL5,XYLB,HES7,STARD4,RNASE4,PDZK1,BHLHA15,PRAP1,HDHD3,HSPG2,EML1,CLDN6,ACE2,EML6,RBP4,CLDN4,RBP2,RFX6,TFR2,CLDN9,CYP2E1,UQCRC2,HPD,MYL9,PIF1,CDCA2,ABCB6,SHMT1,IL20RB,NCAPG,GATA4,SLC5A1,SLC30A10,DYNC2LI1,HSD11B2,GUCD1,CYB5R3,AGMO,PDGFC,ADAMTS17,GRPEL2,RDH16,RHBDL3,PPARGC1A,PPARGC1B,GSTM4,MYH7B,GPR17,JUN,ABCA5,TIPARP,MTERF2,EDEM2,FN1,EIF2AK3,ERLIN1,NR0B2,PKIB,SULT1B1,FAT4,FERMT2,ARHGAP9,PIGR,KCNC1,ATF7IP2,PRKAG2,GPR20,LRRC3,LRRC31,MMP20,OSBPL10,SHF,SULT1C2,SHH,TCP11L1,DLGAP4,LYPLA1,DUSP3,ELOVL2,WNT9B,ELOVL6,F2,SLC39A14,PTGR2,TMEM37,MMP11,FAM222A,SLC7A7,BDH2,BDH1,MMP15,OAF,RILPL1,PXDN,MMP17,PLSCR4,DPYD,KCNMA1,ADSSL1,PTRH1,SLC29A4,PPARA,RAPGEF5,CRYAB,VAMP2,RAPGEF4,KANK1,ECHS1,PTAFR,SEZ6,DLST,SNX32,FAM117B,FAM117A,UCP2,FLNC,EGLN1,PKLR,BIK,KCNB1,DCBLD2,FABP1,SPSB1,AADAC,SNX16,TTLL2,TMEM56,NCAPD2,LGR5,CRLF1,FRYL,ALDH1L1,EXOC3L4,NAB2,FAM13A,LY75,PLOD2,RORA,FRY,FADS2,MFSD13A,HPGDS,SESN1,SCMH1,NUDT19,TNFRSF8,NEK2,SLC25A43,SLC25A45,SLC16A3,SH2D5,FADS1,SLC16A5,EPM2A,PPP1R16B,DGAT2,PCYT2,DGAT1,KCNH6,KCNH7,FST,ZBTB38,PIPOX,ATP11A,NEAT1,CASD1,MYT1,SLC9B2,ACAP3,SLC9A3,TPST1,SMO,SLC27A2,AJUBA,SQSTM1,SLC27A5,LY6E,OSBP2,SHC4,PFKFB1,PFKFB4,BLM,SHC2,KHDRBS3,CREM,LY96,GSTT1,LIN7A,NPAS2,ACAT2,RAP1GAP,IGSF21,SNN,TKFC,PMVK,TNFRSF14,HACL1,TMEM120B,RBPMS,HPS4,ZBTB10,CORO2A,MLXIPL,CXCL10,MFHAS1,GGCX,DMXL2,MDM2,SP5,ACO2,HPSE,SLC25A1,PIWIL2,MIPEP,SNAP25,ITGB5,LEAP2,ONECUT3,AKAP8L,RASGRF1,ETFA,NRARP,ARRB1,MSLN,BICD1,NADK2,DDI2,ACP6,UGT2A3,UPP1,ME2,BCAS1,BOK,TRIM67,SMIM14,SLC36A1,ADGRV1,ITGA2,TNFRSF19,KSR2,VPS37B,PARD3B,SLC25A15,BMP2K,GAPDH,DTL,SLC25A13,SEC23A,SLC47A1,PRKAA2,LRP1,SLC5A11,HSD17B13,SLC5A10,CXXC5,CXXC4,BARX2,PPM1E,ZNRF1,SLC25A29,SH3BP1,TIFA,TRIM47,E2F2,IGF2BP3,FYN,D2HGDH,IGF2BP2,LRRC8E,SLC12A4,COL26A1,TRIM40,MMAB,CTNS,TTC39C,MERTK,TPD52L1,SORL1,TM6SF2,MYO1D,SYT12,MYO1A,TRIM35,NAGS,OCIAD2,ATXN10,PPP1R14D,TRIM31,CPNE8,AHCYL2,THSD7B,SLC23A1,IKZF4,ICAM1,LGALS3,RINL,RASSF5,RASSF6,TNFSF10,KIF21A,KIF21B,CCDC92,ACAD11,SCN1B,TMEM88B,PAQR7,PAQR4,ENTPD8,TM4SF5,ADGRA3,TM4SF4,MYO7A,MFSD11,GCAT,ASRGL1,CYP39A1,SOAT2,KCTD14,KCNQ4,RIN3,MXRA7,KCTD17,KIF20B,EPHA1,EPAS1,TTBK1,NEU3,RACGAP1,PCBP4,ST8SIA6,SNX8,SCN3A,RAB11FIP4,DECR1,RAB11FIP5,BBS1,REG4,ST8SIA3,IFFO2,RAB27A,MYO5A,DCLK2,RASSF9,SMARCA1,FER1L6,NET1,MYO5B,WNK2,MYO5C,ECHDC1,KYAT1,COL9A3,RGL1,CCNJL,NRP2,DHRS11,ACY1,MOGAT2,PTPRN,HNF4G,ICA1,PCSK9,GRIK4,PTPRM,SLC7A11,PTPRH,CLYBL,KHK,HERPUD1,PCLO,HNF4A,ACADM,ACADS,PCYT1B,TMEM150A,MRPS27,TNFRSF12A,ANO8,ANO9,KIF24,ANO6,TMEM150C,KIF27,DEPDC7,KIF9,NR5A2,SYNC,PDZRN3,TMPRSS9,NAPB,SLC43A3,TMPRSS3,SLC43A1,AKR1D1,CAPG,HSD17B6,GNAI1,ZFP14,RXRA,CAMK2N1,XDH,CAP2,IL33,GABBR2,PLEKHA2,KLHL3,ALDH4A1,SH3RF2,NUDT7,CFHR2,KLHL5,KIF26B,TCEA3,TCEA2,ESYT1,RTN4IP1,CD68,RAMP1,FOXA3,OTC,FOXA1,KLB,SCARB1,ACAA2,ZFAND4,GDA,CPOX,LOXL4,BUB1B,JADE3,GXYLT2,NR3C1,CELSR1,ETS1,CARF,TGM1,TBC1D31,PALM,FAM3B,CAPN2,GGT1,SBF2,RGS9,TGM2,ENPP7,SPINK4,GEN1,SCARA3,G6PC,SPINK1,ADPRHL1,ACOT12,NPNT,MUC3A,PRLR,RUNDC3A,PDGFRL,ERN1,PROCR,ERN2,DOK4,SHPK,GPD1,SIDT1,TBC1D24,ODF3B,EMID1,CARD11,TBC1D19,NDRG4,PROZ,CACNA1A,SLC1A3,CACNA1C,NDRG2,PLD1,NDRG1,ACACB,ACACA,ADGRG1,ADGRG7,CALD1,ADGRG6,ISOC1,TBC1D14,H1FX,NXPH1,MORC1,VARS2,WNT3,PRNP,TCAF1,ARHGEF37,CCDC138,VDR,CRIM1,HMGA2,KLHL23,INHBC,ISG20,GNAO1,SDK1,NAT8,GNAL,CPS1,PQLC1,CCPG1,PQLC3,BHLHE40,AMOTL2,GALK1,PRR5,MAST3,TREH,LDB3,SOBP,PITPNC1,TMEM220,LMNB1,RND1,GDAP1L1,ARFGEF3,SUN2,TGIF2,DDX58,TBC1D8,SSTR1,GPCPD1,ETV4,SYNGR4,SSTR3,SPIDR,ETV5,GIP,TAPBP,TBC1D2,RCN1,SETBP1,GFOD1,TBC1D4,IRF1,CAT,CRY2,RBM20,CDHR5,FBP1,SHANK2,OTUB2,LAMA5,DCTN2,REP15,PLA2G1B,LAMA3,SLC3A1,ADD3,AURKB,AURKA,AGPAT4,GNG4,SPOCK2,MXI1,POLD2,MVB12B,ATOH8,SLIT1,CRYM,ATOH1,FAHD1,BNIP3,SUOX,MAPK13,RPIA,ADGRD1,SARDH,ASB4,GALM,CHPT1,SNTB1,ASB1,RB1,MAML2,GLDC,TRIL,ABAT,ELK3,GLS,CREB3L3,MYB,PLCE1,CYP1B1,PIP4K2A,NCKAP5,HOXA4,GAMT,DAPK1,SERPINF2,AFAP1,PRKCA,SYTL3,DKK3,DEPDC1B,RNF125,WDR81,TEP1,ACOT2,TYRO3,ACOT1,TSPYL4,ASF1B,ENPEP,CFI,SDSL,ADH4,LDHA,CRACR2B,TTPA,SLC19A3,HMOX1,RREB1,ST3GAL1,ST3GAL2,SLC19A1,SLC19A2,LHPP,CDK17,PRELID2,FZD5,PLK2,PLK1,NFATC3,NFATC2,SLC16A10,NR1D1,A1CF,ST18,FOSL1,GJB1,SLC6A9,H2AFY2,CYP1A1,SERPINI1,DENND1C,PHF1,TGFB1I1,LPCAT1,GPT,ADM,PYGL,SERPINA9,SLC6A4,TMEM189,FAM102A,C1QTNF1,IMPA2,ANXA6,TIMP3,TK1,TEAD4,NDC1,EDARADD,CLUH,IFNGR1,SLC2A13,DENND2A,ANXA5,ITPK1,ELMOD3,SERPINB9,GCHFR,PLCB3,FAM234B,INF2,NCOR1,MRAS,HEATR5A,RGN,KIFC3,PLCB1,MGLL,PHLPP2,GRAMD1A,ASAH2,PHLPP1,NR1I3,NR1I2,PRUNE2,GCNT1,AFM,FAM129A,TMEM160,AFP,GRAMD4,TMEM163,FGD2,FAM129B,RNF135,RASSF10,ASPDH,RNF130,GPR157,BCHE,AOC1,GSN,F10,GLYCTK,MOCOS,GSR,RFLNB,NR1H3,GUCA2B,FMO4,FMO5,DHRS3,AGT,GUCA2A,AGMAT,DHRS4,SULF2,SLC8A3,ABI2,LPCAT3,SARM1,MSRB3,COQ8A,SLC28A2,SLC28A1,RAB3C,ANKRD37,CHPF,IRS1,GUCA1A,CLU,LCLAT1,PYCARD,DEPTOR,SALL2,CDH2,GRB14,FCGRT,IYD,SLCO2B1,SLC39A6,CHP2,TNR,PLXNC1,ZFP37,PLS1,SEMA6C,RAB2B,SLC15A1,SEMA6A,IPMK,MAGI2,DIO1,IGFBP2,MITF,FRMD4A,RAB30,RAB36,RAB37,MADD,TNIK,CEMIP,CUL7,GPR119,HVCN1,ABHD1,ABHD8,ITPR1,ITPR2,SLC38A11,MTM1,NACC2,SRGAP1,PLXNA4,FN3K,CCDC18,OSBPL6,ATP8B2,SLC4A11,ADAP1,TOR1B,REEP1,DAB1,P4HA1,NBEA,RCAN3,CPE,SPIRE1,MAFK,REEP6,DHCR7,SLC26A3,PLEKHM3,CPQ,ZC3H6,PIK3C2B,SYNE1,KBTBD13,PSTPIP1,DUSP10,IDH3B,CEP170,SLC37A4,GAL3ST2,PLEKHG3,SLC13A2,PLEKHG1,PLA2G12B,SGIP1,CKAP2L,PLEKHG5,APOA1,GPX7,APOA4,NIPSNAP1,PTP4A3,TFDP2,ESPL1,LCK,MEP1A,ANG,CEBPA,RNF32,PLEKHH2,ACSS2,SMPX,CCDC68,SEMA3F,BPHL,THSD4,SELENBP1,AP3M2,ABLIM1,DCAF17,ABLIM2,P2RY2,CEACAM20,MAL2,RFFL,ACSS1,ALOXE3,STOX1,CACNG4,SEC11C,SMOX,MACC1,CCDC58,APOC3,SEMA4G,PTPN14,CPPED1,NFASC,FRAS1,P2RX2,GLOD5,IFITM1,IL1RN,SPARC,FAM89B,PANK1,AQP8,DIXDC1,GDE1,KLHDC7A,CBLB,AQP4,ACSM5,AQP3,CISD3,IFIT3,CHEK2,NIPAL2,DAG1,DPF3,SOX9,SKP2,HABP2,SLC6A19,IL1R1,SLC11A2,ACSL5,SLC51A,KNL1,ACSL3,SLC51B,CYP27A1,TIAM2,POR,KATNAL1,RRAGD,SUCLG2,VDAC1,GSAP,ATP6V0D1,PLPP3,NBL1,CFTR,MACF1,MAOB,PDE1C,MAOA,SLC22A1,MTTP,TSHZ2,INPP5A,STC2,MAP6,CDR2,SPTBN2,TRAP1,CARMIL3,PTPRN2,SLC33A1,PYCR1,CIDEC,PARP12,TPX2,CCDC88A,VNN1,NCEH1,VNN3,PDE3A,SPATS2L,TECPR1,COL18A1,TENM4,SLC44A2,SH3KBP1,GBE1,ZFAND2A,STAB2,ROBO1,SH3PXD2A,CAMKV,ANKRD1,TINAG,PSD,ZCCHC24,EDN1,ATP6V0B,PACRG,TMED8,GPBAR1,PROX1,GFRA3,RENBP,ZDHHC14,GFRA4,RAD51B,UGDH,CLDN15,ALDOB,CD302,MAPT,ALDOA,DNASE1L3,MPND,HAAO,HDC,AMIGO2,AKAP7,ZDHHC21,VWCE,PHYHIP,NKD1,CST3,TCEAL8,PDPR,TM4SF20,RAD54L,RPRML,EMC9,PTGES2,SUSD2,SORBS2,LHFPL2,PDZK1IP1,SORBS3,ETNPPL,KRT18,GSTA1,GHRL,APBA1,B9D1,MEGF9,STEAP3,GOLT1A,GALNT18,NDUFA10,NRM,SDR9C7,ESPN,CNDP1,TMEM143,CCDC28A,SCGN,CHCHD3,PDE8B,PDE8A,ABCG5,UNC5CL,GAS2L3,ANXA13,ARID5A,KCTD1,PDIA5,DCTD,GLTPD2,TMEM135,COL4A2,COL4A1,TMEM139,SELENOP,NUPR1,ABCG2,RASL12,AKNA,CTTNBP2,ALOX15,ARHGAP18,FBLN1,CPLX2,NID2,PDZD3,PCSK1N,SCUBE1,SCIN,ALDH3B1,FAM83D,MYH10,ANKZF1,FAM83B,ASIC1,KLHDC2,TGFB2,ACBD4,TGFB3,EPHX2,TRPV2,TRPV3,DNAJC12,COQ9,HSPA2,ACSF2,COQ5,EFNA1,SLC2A9,SEPSECS,DAP,DAO,AMACR,DLG4,CRYL1,FGFR4,LRP11,ABCD4,ACADVL,DOCK4,THRB,PDE3B,SLC2A1,SLC2A2,HSPB1,SLC2A6,PKD1,HK2,HEBP2,MFSD9,DBP,ALDH2,MCF2L,ABCD1,HIST1H1C,ABCC4,EGFL7,KLF12,CAMK1D,URAD,IQCD,UPK3A,PRODH2,TGFBR3,FGR,DDAH2,EHHADH,ALDH1A1,RBMS1,PDE5A,CDH16,RBMS3,KDM3A,HLF,TUFT1,PALM3,LEF1,ATP1A1,TFPI,THBS1,USP18,HSPD1,MUC2,ALDH1B1,GNA11,ERBB2,NT5DC3,STOM,HES1,LRIG3,BPNT1,MUTYH,QPCTL,CADPS,ARID3A,MEIS2,CAPN13,FMNL2,XPNPEP1,PIK3IP1,XPNPEP2,AQP11","35","92.67","Hnf4a","false","false","Cluster 2","Clustered","10.193548387096774","0","ENSMUSG00000017950"
"2127","","",,,"Suox","false","false","Cluster 2","Clustered","8.454545454545455","0","ENSMUSG00000049858"
"1102","","",,,"Fam78a","false","false","Cluster 2","Clustered","8.672727272727272","0","ENSMUSG00000050592"
"77","Literature ChIP-seq,66;ARCHS4 Coexpression,111;Enrichr Queries,175;ReMap ChIP-seq,215;GTEx Coexpression,623","ANKLE1,MT-ND5,CWH43,TSKU,GLS,MYLK,GJA1,CREB3L3,CREB3L4,MYB,CYP1B1,HOMER3,HOXA5,IER3,GAMT,HES7,STARD4,PRKCH,RNASE4,PRAP1,CLDN6,ACE2,CLDN4,HOXB9,RBP2,WDR81,CLDN9,ASF1B,ENPEP,SLCO5A1,SLC5A1,HSD11B2,GUCD1,CRACR2B,PDGFC,HMOX1,ST3GAL1,S100A11,PPARGC1B,FAM120AOS,NFE2,JUN,PLK2,FN1,NR1D1,FOSL1,COL1A2,FXYD3,LGMN,RET,PIGR,BTG2,PRKAG2,ADM,PYGL,PRSS22,RCSD1,SULT1C2,TMEM189,SHH,TIMP2,TIMP3,TK1,ANXA1,IFNGR1,ROM1,MYOF,TMC8,SLC39A10,APBB1IP,TMEM37,PLCB3,SLC7A7,INF2,ANGPTL6,PXDN,CDC42EP3,PLEKHO1,PLEKHO2,GAS6,VAMP2,MGLL,OAT,PTAFR,NR1I2,COL11A2,FAM129A,SEZ6,SNX33,PTGS2,PAPSS2,FAM129B,FGD3,CARNS1,ANO10,CHML,EGLN1,CDKN2B,AOC1,GSN,GUCA2B,GUCA2A,DHRS3,SULF2,FABP1,COL3A1,SPSB1,DHRS9,CLCF1,FOSB,MSRB3,NRROS,EXOC3L4,CSF1,IRS1,RAB3D,RORA,CLU,FADS2,EFEMP2,FCGRT,CHP2,TNR,SLC25A45,SLC16A3,LZTS1,FADS1,PLS1,CDKL2,SEMA6B,SLC15A1,PCYT2,IGFBP5,DGAT1,F2R,PIPOX,NEAT1,SLC9A3,HIC2,OBSCN,S100A6,S100A5,LY6E,PFKFB3,INSIG1,ABHD8,ITPR1,TNFRSF11A,SLC9A3R2,KLC3,IGFBP7,TNFRSF14,KCNF1,CORO2A,CORO2B,REEP1,CXCL10,GGCX,P4HA2,RCAN2,DMXL2,SP6,SLC26A3,ITGAM,CPQ,DUSP10,UGT2A3,WDR6,ITGB7,UPP1,SLC36A1,SLC13A1,SLC13A2,ADGRV1,VPS37B,DUSP22,PTP4A3,PKM,MEP1A,ANG,EVL,ITGA5,ACPP,GAPDH,SLC25A13,CEBPA,CXXC5,SH3BP1,SLITRK6,E2F2,TRIM47,BAK1,ALOXE3,RNF24,KCNIP3,MACC1,FBXL16,TTC39A,TM6SF2,MYO1D,KLF7,MYO1A,TRIM35,NECTIN4,PPP1R14D,KCNK2,IL1RN,VIPR1,SPARC,FAM89B,SLC23A1,GFI1,MKI67,IFI30,IFIT3,ICAM1,LGALS3,RASSF5,CHEK2,TNFSF10,LONP1,DPF3,SOX9,MFSD2A,EPHA5,SLC6A19,PAQR4,IL1R1,ENTPD8,ACSL5,SLC51B,IFI27,SOAT2,PPP1R3B,MALL,NBL1,PTGES,NRN1,EPAS1,MAOA,MTTP,PGBD5,PCBP4,TSPAN4,HIVEP3,KCNN4,REG4,PTK6,TRERF1,CCDC88B,TPX2,MYO5B,SPATS2L,KYAT1,ITM2C,PCSK1,DHRS11,ACY1,SLC35F2,MOGAT2,GBE1,CITED4,HNF4G,SLC7A11,PTPRH,HERPUD1,LIMD2,GYS1,SH3PXD2A,HNF4A,CD38,FFAR2,SEC61B,TINAG,PSD,ZCCHC24,EDN1,PACRG,TNFRSF12A,MME,ANO8,ANO9,CLDN15,TFF3,ALDOB,ALDOA,MPND,TLR4,DBN1,TLR2,AMIGO2,CXCR4,CRIP2,CAPG,CRIP1,NKD1,CST3,RXRA,TM4SF20,XDH,EMC9,PURG,PTGES2,KRT18,QPCT,PCDHB16,ESYT1,CD68,FOXA1,SCARB1,FCGBP,NR3C1,CELSR1,ETS1,PLB1,PLAU,BASP1,GGT1,TGM2,SPINK4,CHRNB4,CD93,ADPRHL1,COX6B2,MUC3A,PLA2G15,DCTD,PROCR,DOK4,MAP7D1,SELENOP,ODF3B,NUPR1,CARD11,PLGRKT,LPL,SLC1A3,ARHGAP18,FBLN2,NDRG1,PDZD3,ADGRG7,NLRP6,UAP1L1,TBC1D14,FAM83B,PRNP,MGAM,ACBD4,VDR,HMGA1,SYT7,DAP,ATG16L2,DLG4,BHLHE40,PHF19,ACADVL,PLEK,SLC2A1,HSPB1,YBX2,LAMC2,SLC2A4,PKD1,PITPNC1,CASP7,DBP,ADGRE5,CASP1,ABCD1,CFAP45,HIST1H1C,URAD,PLAUR,IQCD,SPIDR,SSTR5,ACTA2,TBC1D2,CDHR1,IRF1,RBMS1,CDHR5,FBP1,RBMS3,LAMA5,TUFT1,RGS16,THBS1,AURKB,AGPAT4,MUC2,GNA11,NT5DC3,HES1,NCAM2,HES2,PDLIM4,ATOH1,GALNT5,ARID3A,PPP2R3A,MAPK13,XPNPEP2,COL7A1,FAM131A,GALM,SNTB1","150","238.0","Vdr","false","false","Cluster 2","Clustered","8.60912190963342","0","ENSMUSG00000022479"
"1099","","",,,"Sult6b2","false","false","Cluster 2","Clustered","9.545454545454547","0","ENSMUSG00000048473"
"2122","","",,,"Fam183b","false","false","Cluster 2","Clustered","8.590909090909092","0","ENSMUSG00000049154"
"1094","","",,,"Gcnt1","false","false","Cluster 2","Clustered","9.12087912087912","0","ENSMUSG00000038843"
"1093","","",,,"Scarb1","false","false","Cluster 2","Clustered","8.666666666666668","0","ENSMUSG00000037936"
"2117","","",,,"Rnf24","false","false","Cluster 2","Clustered","8.672727272727272","0","ENSMUSG00000048911"
"1087","","",,,"Ndc1","false","false","Cluster 2","Clustered","9.382352941176471","0","ENSMUSG00000028614"
"2110","","",,,"Ranbp3l","false","false","Cluster 2","Clustered","8.672727272727272","0","ENSMUSG00000048424"
"1086","","",,,"Spink4","false","false","Cluster 2","Clustered","8.812865497076023","0","ENSMUSG00000028415"
"2107","","",,,"Sacs","false","false","Cluster 2","Clustered","9.696969696969697","0","ENSMUSG00000048279"
"2106","","",,,"Fbxo10","false","false","Cluster 2","Clustered","8.836363636363636","0","ENSMUSG00000048232"
"1079","","",,,"Rsad2","false","false","Cluster 2","Clustered","10.153846153846155","0","ENSMUSG00000020641"
"1076","","",,,"Plekho1","false","false","Cluster 2","Clustered","9.010989010989011","0","ENSMUSG00000015745"
"2099","","",,,"Stbd1","false","false","Cluster 2","Clustered","8.5","0","ENSMUSG00000047963"
"1075","","",,,"Sulf2","false","false","Cluster 2","Clustered","9.130718954248367","0","ENSMUSG00000006800"
"1073","","",,,"Adgre5","false","false","Cluster 2","Clustered","8.583333333333332","0","ENSMUSG00000002885"
"1071","","",,,"Prnp","false","false","Cluster 2","Clustered","8.87719298245614","0","ENSMUSG00000079037"
"1070","","",,,"Pnmal2","false","false","Cluster 2","Clustered","8.454545454545455","0","ENSMUSG00000070802"
"2093","","",,,"Atg16l2","false","false","Cluster 2","Clustered","9.0","0","ENSMUSG00000047767"
"1069","","",,,"Slc35g2","false","false","Cluster 2","Clustered","8.454545454545455","0","ENSMUSG00000070287"
"1068","","",,,"Gm10273","false","false","Cluster 2","Clustered","9.487179487179487","0","ENSMUSG00000069622"
"1066","","",,,"Myo1h","false","false","Cluster 2","Clustered","9.12087912087912","0","ENSMUSG00000066952"
"1065","","",,,"Syne2","false","false","Cluster 2","Clustered","8.590909090909092","0","ENSMUSG00000063450"
"1064","","",,,"B9d2","false","false","Cluster 2","Clustered","9.542857142857143","0","ENSMUSG00000063439"
"2084","","",,,"Cldn4","false","false","Cluster 2","Clustered","8.952380952380953","0","ENSMUSG00000047501"
"1059","","",,,"Btn2a2","false","false","Cluster 2","Clustered","9.544117647058824","0","ENSMUSG00000053216"
"1823","","",,,"Bmp2k","false","false","Cluster 4","Clustered","5.5","0","ENSMUSG00000034663"
"2430","","",,,"Zdhhc21","false","false","Cluster 4","Clustered","5.833333333333334","0","ENSMUSG00000028403"
"2781","","",,,"miR-92a-3p","false","false","Cluster 4","Clustered","5.166666666666667","0","mmu-miR-92a-3p"
"316","","",,,"Tnfrsf12a","false","false","Cluster 4","Clustered","5.2","0","ENSMUSG00000023905"
"1947","","",,,"Rbms3","false","false","Cluster 4","Clustered","5.785714285714286","0","ENSMUSG00000039607"
"1083","","",,,"Stk17b","false","false","Cluster 4","Clustered","6.0","0","ENSMUSG00000026094"
"2841","","",,,"miR-30b-5p","false","false","Cluster 4","Clustered","5.978021978021978","0","mmu-miR-30b-5p"
"1337","","",,,"Slc4a7","false","false","Cluster 4","Clustered","5.785714285714286","0","ENSMUSG00000021733"
"2805","","",,,"miR-19b-3p","false","false","Cluster 4","Clustered","5.196969696969697","0","mmu-miR-19b-3p"
"2259","","",,,"Cyp2d22","false","false","Cluster 4","Clustered","6.236363636363636","0","ENSMUSG00000061740"
"1391","","",,,"Map3k12","false","false","Cluster 4","Clustered","6.377777777777777","0","ENSMUSG00000023050"
"2766","","",,,"miR-19a-3p","false","false","Cluster 4","Clustered","5.196969696969697","0","mmu-miR-19a-3p"
"1547","","",,,"Rbms1","false","false","Cluster 4","Clustered","5.785714285714286","0","ENSMUSG00000026970"
"1929","","",,,"Arhgap18","false","false","Cluster 4","Clustered","5.5","0","ENSMUSG00000039031"
"1161","","",,,"Celf2","false","false","Cluster 4","Clustered","6.0","0","ENSMUSG00000002107"
"1125","Literature ChIP-seq,83;ARCHS4 Coexpression,410;Enrichr Queries,269;GTEx Coexpression,575","MAML2,TESK2,MSANTD3,ENO1,MYLK,ELK3,GJA1,EVA1B,CYP1B1,HOXA5,IER3,HOXA4,AFAP1,RNASE4,HSPG2,EML6,RNF125,BIN1,LGALS12,MAP1A,HOXB3,CYP2E1,HOXB8,CYB5R2,ADAMTS15,LDHA,CYB5R3,CRACR2B,PRKAR2B,HMOX1,ST3GAL1,S100A11,ST3GAL2,SLC19A2,CDK17,JUN,FZD4,PLK2,MCAM,FZD7,FN1,ABCA7,NR1D1,SLC16A13,FOSL1,EHD2,XKR7,COL1A2,FXYD2,XKR5,CDKN1C,BTG2,LRRC10B,TGFB1I1,ADM,PEAR1,SHF,TUBA1B,ADAMTSL4,TIMP2,TIMP3,DLGAP4,TEAD4,ANXA1,ANXA3,MYOF,ANXA5,TMEM40,SLC39A10,SLC39A13,PAX6,MANEAL,TMEM173,SIRT3,GPRC5B,PLCB3,INF2,SLC7A8,OAF,PXDN,DPYD,CDC42EP3,ADSSL1,PLEKHO2,MGLL,MDFI,GRAMD1A,RNASEL,FAM129A,HOXD13,SNX33,PTGS2,FAM129B,RNF135,AGR2,FLNC,SPDEF,GSN,SLC16A1,MOCOS,GPR4,TMCO4,SLC8B1,SULF2,COL3A1,SPSB1,CLCF1,MSRB3,COQ8A,NUCB2,ANKRD13D,NRROS,CSF1,CHPF,IRS1,CHRM4,NAB2,PLOD2,FADS2,EFEMP2,TUBB6,SESN1,SLC25A43,SLC25A45,SLC16A3,SLC16A5,SEMA6D,F2R,CSGALNACT2,NEAT1,ACAP3,RAB37,MFNG,S100A6,S100A5,TNIK,PHLDB2,AJUBA,INTS6L,KANK3,BRSK2,PFKFB3,ABHD8,GMPR,SLC9A3R2,NEUROD1,SNN,PMVK,IGFBP7,TNFRSF14,ATP8B2,BDNF,CORO2B,P4HA1,NFE2L3,SPIRE1,ESAM,MAFK,TUBA8,SLC25A1,KCNK6,RNF11,ITGB5,ARRB1,NRARP,PIK3C2B,PSTPIP1,DUSP10,DDI2,DSE,BOK,ADAMTS7,PLA2G12A,PLEKHG1,ITGA2,PLEKHG5,APOA1,VPS37B,NIPSNAP1,ARL4C,PTP4A3,PKM,ADORA2A,BMP2K,ITGA5,GAPDH,ALDH9A1,SEMA3C,SEMA3F,ZNRF1,TIFA,TRIM47,FYN,D2HGDH,ALOXE3,TRIM40,MARCKSL1,PRRX1,SMOX,AHNAK2,TTC39A,KLF7,SYT11,NAGS,PFKP,CPNE8,SPON2,SPARC,FAM89B,FAM89A,MKI67,AQP3,ICAM1,LGALS3,LONP1,KIF21B,CCDC92,ACAD11,HABP2,EPHA4,IL1R1,P3H1,P3H3,MALL,RIN3,KCTD12,KDELR3,PLPP3,KIF20B,NBL1,TRIM11,STX1A,EPAS1,GIPR,PIK3R3,STC2,TSPAN4,SNX9,SPTBN2,RAB11FIP5,RASSF9,RAB27B,ECHDC1,SPATS2L,ITM2C,COL18A1,NRP2,ECM1,SLC44A2,ICA1,PTPRM,KIF11,PTPRH,HERPUD1,GLIPR1,STBD1,RAC3,ACADM,DLAT,TNFRSF12A,ANO6,PROX1,SLC35G1,AP3B2,ANO1,NR5A2,ALDOA,DBN1,VGLL3,SLC43A3,AMIGO2,SLC43A1,CXCR4,ZDHHC24,CRIP2,VWCE,CST6,CRIP1,RASIP1,CST3,RAD54L,CBR3,GABBR2,GDF11,LHFPL5,VEGFC,LHFPL2,PDZK1IP1,RIT1,XK,KRT18,FKBP1B,TCEA2,ESYT1,STEAP3,PLAT,JADE2,NR3C1,CELSR1,ESPN,ETS1,CELSR3,GIMAP8,PLAU,CAPN2,COTL1,TGM2,CD93,ARID5A,KRT79,SDHB,PROCR,GLTPD2,COL4A2,DOK4,COL4A1,MAP7D1,GPRIN1,NDRG4,AKNA,ARHGAP18,FBLN2,NID2,NDRG1,FUT1,ADGRG1,CALHM2,CALD1,ALDH3B1,MFAP3L,SYT5,PRNP,FDPS,TGFB2,CAV2,CRIM1,HMGA2,MSN,EVX1,INHBB,SSC5D,INHBC,BMP6,SYT7,ARHGAP23,EFNA1,DAP,EFNA3,BMP2,NR4A3,UBXN11,ATG16L2,DLG4,FEV,BHLHE40,AMOTL2,AMOTL1,PHF19,ACADVL,MAST3,SLC2A1,HSPB1,HK2,LMNB1,DBP,ADGRE5,HS3ST3B1,EGFL7,ARHGEF15,PLAUR,ETV5,CKAP4,GIP,ACTA2,TGFBR3,RCN1,RASA3,IRF1,CRY2,RBMS1,CDH13,NDUFS2,PDE5A,FBP1,LAMA5,RGS14,LAMA4,ATP1A1,THBS1,AURKB,DDN,MUC2,GNA11,MXI1,STOM,HES1,SLIT2,PDLIM4,CMTM3,MEIS2,MAPK13,FMNL3","263","334.3","Elk3","false","false","Cluster 4","Clustered","5.5","0","ENSMUSG00000008398"
"869","","",,,"Cep170","false","false","Cluster 4","Clustered","6.0","0","ENSMUSG00000057335"
"1252","","",,,"Abca5","false","false","Cluster 4","Clustered","6.236363636363636","0","ENSMUSG00000018800"
"1521","","",,,"Ptprc","false","false","Cluster 5","Clustered","3.7333333333333334","0","ENSMUSG00000026395"
"2838","","",,,"miR-27a-3p","false","false","Cluster 5","Clustered","3.575757575757576","0","mmu-miR-27a-3p"
"2829","","",,,"miR-92b-3p","false","false","Cluster 5","Clustered","3.238095238095238","0","mmu-miR-92b-3p"
"1316","","",,,"Cdca7l","false","false","Cluster 5","Clustered","3.7333333333333334","0","ENSMUSG00000021175"
"1057","","",,,"Eml5","false","false","Cluster 3","Clustered","8.307692307692308","0","ENSMUSG00000051166"
"1053","","",,,"A430105I19Rik","false","false","Cluster 3","Clustered","8.235294117647058","0","ENSMUSG00000045838"
"2076","","",,,"Enpp7","false","false","Cluster 3","Clustered","7.35","0","ENSMUSG00000046697"
"2072","","",,,"Bdh1","false","false","Cluster 3","Clustered","8.076923076923077","0","ENSMUSG00000046598"
"1046","","",,,"38047","false","false","Cluster 3","Clustered","6.9743589743589745","0","ENSMUSG00000039372"
"1045","","",,,"Tlr4","false","false","Cluster 3","Clustered","8.181818181818182","0","ENSMUSG00000039005"
"1044","Literature ChIP-seq,55;ARCHS4 Coexpression,696;Enrichr Queries,418;GTEx Coexpression,58","CNTFR,STMN3,ABAT,SAMD14,CREB3L3,EVA1B,PLCE1,CHGB,UNC5A,RBFOX3,PRKCA,HPCAL4,FCAMR,GPR162,EML6,MYL7,WDR81,ACOT1,GPLD1,TSPYL4,ABCB6,CYB5R2,ADH4,SLC19A3,NKX2-2,CADM4,MTERF2,FZD7,PLK1,EIF2AK3,L1CAM,NR0B2,ST18,PKIB,XKR7,ZBTB8B,PRR36,FERMT2,CDKN1C,KCNC1,LPCAT1,ADM,SERPINA9,OSBPL10,SLC6A4,SHF,TUBA1B,MMP24,TMEM44,TRIM3,TCP11L1,PBK,NEFL,NEFM,ANXA8,RNF150,CNOT6L,DUSP3,ACTL6B,IFNGR1,SLC2A10,PAX6,MANEAL,SERPINB5,RILPL1,PXDN,KCNMA1,SLC29A4,PPARA,GAS6,KCNA1,NR1I3,SEZ6,NDUFA4L2,SNX32,TMEM71,GPR151,AGR2,RUNX1T1,GABRA1,RIC3,EGLN3,SLC16A1,KCNB1,NMNAT2,TUBB4A,AGT,STXBP5L,DCBLD2,SNX16,RIMBP3,COQ8A,TMEM229B,ALDH1L1,GPR68,IRS1,RAB3D,RORA,LCLAT1,TNF,FADS3,SLC25A48,FGF9,ADORA1,SLC16A6,PLXNC1,SLC25A45,FADS1,EPM2A,KCNH3,TLE2,SEMA6D,IPMK,DIO1,IGFBP2,NEAT1,MYT1,DISP2,ACAP3,OLFM1,OBSCN,RAB37,MADD,LY6D,PHLDB2,BRSK2,SHC2,ARL6,GPR85,NREP,NPAS2,GLIS2,NEUROD1,IGSF21,TKFC,NPTX1,NPTX2,TMEM120B,OSBPL6,SDF2L1,BDNF,OSBPL2,ZBTB10,CORO2A,TOR1B,DAB1,SP6,MDM2,NFE2L3,SP5,REEP6,SLC26A4,CNIH2,MAP3K12,SNAP25,TRIM72,MTCL1,ONECUT3,RASGRF1,CELF3,LECT2,ELFN1,UNC80,SCRN1,BOC,ACP5,LBR,TRIM67,BOK,SLC36A1,PLA2G12B,KSR2,VPS37B,KCNAB3,PTP4A3,BMP2K,ITGA7,SEMA3G,NLRC3,CXXC5,SRL,PPM1E,BPHL,RAB23,IGF2BP2,RFFL,CACNG4,TRIM40,RNF24,MMAB,MACC1,CCDC58,APOC3,FOXJ1,SYT14,SYT13,FBXL16,TTC39C,PTPN13,KBTBD11,MAB21L3,PFKL,SYT12,RAB15,NOVA2,SERHL,INSM1,NAGS,PABPC1L,PANK3,LDLRAD3,CBLB,SOGA1,RASSF6,KIF21B,SOX9,SLC12A8,PDK1,EPHB3,EPHA5,EPHA4,PAQR7,RSAD2,MAPK8IP2,PLPP4,SOAT2,RRAGD,TRIM13,COL8A1,KCTD12,NBL1,CTXN1,PTGES,NRN1,RWDD2A,PDE1C,EPAS1,STXBP1,LPAR3,TTBK1,PGBD5,B4GALNT1,FAM43A,SCN3A,TRAP1,CARMIL3,SPHKAP,TNFSF15,BRI3BP,GNG13,KLHDC8A,ID4,RGL3,NRP2,CD40,TMEM151B,DHRS11,PTPRN,ZFAND2A,DIRAS2,ROBO1,SCML2,PCLO,CAMKV,PSD,NXPE3,PROX1,AP3B2,SYN2,ZDHHC14,MAPT,CD302,SYNC,DBN1,MATN2,SDCCAG8,CD63,TMPRSS7,ZDHHC21,VWCE,PHYHIP,RPRML,APBB1,MSX1,GABRD,REM2,PURG,GABBR2,SUSD2,KLHL3,LYVE1,GCK,TTC8,CDK5R1,FOXA1,ROGDI,OTP,ESPN,CELSR3,GIMAP8,SCGN,BASP1,PLAU,TEKT4,GGT1,PPFIA4,ENPP7,ACOT11,ANXA13,TTC7B,PROCR,MYCN,GPRIN1,SHPK,NDRG4,CTTNBP2,CACNA1B,PLD5,PROZ,CACNA1A,FBLN1,CPLX2,FBLN2,ACACB,CACNA1H,ACACA,CAMSAP2,SCUBE1,CALHM2,KIF3C,NXPH1,TAC1,FAM83D,ANKZF1,ASIC1,SYT3,CCDC136,MT3,SYT7,DNAJC18,SLC2A9,EFNA3,DAP,DAO,UBXN11,CPS1,BHLHE40,NABP1,ALPI,GPSM1,PNLIPRP1,PRR5,THRB,THRA,PODXL2,TREH,SLC2A4,PKD1,PITPNC1,TTC28,LMNB1,MFSD9,CASP7,GRM4,MCF2L,GDAP1L1,IFT57,SULT4A1,DACT1,TGIF2,DDX58,TBC1D8,ETV1,OLIG1,UPK3B,LSS,DNM1,SSTR5,FGR,ALDH1A3,TBC1D2,VGF,GFOD1,OAS3,COL6A1,ATP6V1B2,RBMS1,CAMK2B,HLF,RGS14,TUFT1,MSLNL,CRMP1,CLCN1,NCALD,DDN,GNG4,SPOCK2,ERBB2,BPNT1,HES1,CHGA,CMTM3,PCDHGC4,LIMK1,CCK,ARID3A,MEIS2,COL7A1,RBM43","229","306.8","Neurod2","false","false","Cluster 3","Clustered","6.808080808080808","0","ENSMUSG00000038255"
"2068","","",,,"Kcnk6","false","false","Cluster 3","Clustered","8.181818181818182","0","ENSMUSG00000046410"
"2065","ARCHS4 Coexpression,125;Enrichr Queries,87;GTEx Coexpression,385","CD83,SPARC,KLHL32,AQP4,ABAT,CELSR1,CLU,CNDP1,IFIT3,LGALS3,PAIP2B,GJA1,KIF5C,BASP1,PALM,DPYSL3,ADORA1,TNR,PIP4K2A,CYP1B1,DENND5A,PLXNC1,SOX9,LZTS1,FADS1,MFSD2A,IER3,KCNK10,IGFBP5,MAGI2,APLP1,IGFBP2,SHISA4,MYT1,MTURN,MAPK8IP1,CLIP3,OLFM1,ACAP3,PLPP4,SOAT2,SELENOP,TYRO3,PLPP3,SCG2,TSPYL4,LY6E,SHC2,NRN1,KHDRBS3,TTYH1,EPAS1,GPR85,CACNA1A,LPL,SLC1A3,NDRG2,APCDD1,NDRG1,RAP1GAP,IGSF21,ADGRG1,NACC2,HMOX1,TSPAN2,KIF3C,NPTX2,TAC1,RAB11FIP4,LHPP,NKX2-2,ASIC1,PRNP,KCNF1,GPR17,JUN,CADM4,DTNA,PTPRN2,FZD9,DCLK2,HSPA2,ADAP1,MT3,GADD45G,GNAO1,QDPR,CXCL10,FA2H,PEX5L,RCAN2,BHLHE40,ID4,CSPG5,COL9A3,LRRN1,DHCR7,ZBTB8B,ITM2C,CDKN1C,BTG2,PODXL2,THRA,GRIK4,HSPB1,ADM,TUBA1A,SLC22A17,DNER,TIMP2,NEFL,TIMP3,KIF1A,CTSF,BCAS1,ZCCHC24,PCYT1B,PIANP,ROM1,ITPK1,FAM219A,ETV1,ETV5,ZDHHC14,GPRC5B,PTP4A3,TUBB2A,VGF,MMP16,PXDN,ALDH1A1,MMP17,ARHGEF4,ALDOC,MAPT,CRYAB,MGLL,CAMK2B,AMER2,CEBPA,KANK1,PHLPP1,LRP1,RGS16,CRMP1,CXCR4,AURKB,NCALD,DLL3,CST3,CAMK2N1,MVB12B,CARNS1,SLIT1,NRIP3,NCAM2,CKB,CRYM,STOX1,CACNG4,GDF11,ARNT2,BCHE,MARCKSL1,GSN,LINGO3,SMOX,KCNIP3,PCDHGC4,SORL1,TUBB4A,KBTBD11,SULF2,TPPP3,NFASC,FMNL2,SYT11,PCDHB16,FOSB,INSM1,TMEM229A,RAMP1,TMEM229B","102","199.0","Olig1","false","false","Cluster 3","Clustered","7.961538461538462","0","ENSMUSG00000046160"
"1038","","",,,"Mid1","false","false","Cluster 3","Clustered","7.03030303030303","0","ENSMUSG00000035299"
"1033","","",,,"Wdr5b","false","false","Cluster 3","Clustered","7.2727272727272725","0","ENSMUSG00000034379"
"1032","","",,,"Mif","false","false","Cluster 3","Clustered","8.318181818181818","0","ENSMUSG00000033307"
"1031","","",,,"Resp18","false","false","Cluster 3","Clustered","7.2727272727272725","0","ENSMUSG00000033061"
"2052","","",,,"Sstr3","false","false","Cluster 3","Clustered","7.912087912087912","0","ENSMUSG00000044933"
"2050","","",,,"Syt16","false","false","Cluster 3","Clustered","7.418181818181818","0","ENSMUSG00000044912"
"1024","","",,,"Map1a","false","false","Cluster 3","Clustered","7.5636363636363635","0","ENSMUSG00000027254"
"1021","","",,,"Fmo4","false","false","Cluster 3","Clustered","7.2727272727272725","0","ENSMUSG00000026692"
"1020","","",,,"Lrrn2","false","false","Cluster 3","Clustered","8.307692307692308","0","ENSMUSG00000026443"
"2041","","",,,"Cnr1","false","false","Cluster 3","Clustered","7.5636363636363635","0","ENSMUSG00000044288"
"2038","","",,,"Ccdc141","false","false","Cluster 3","Clustered","7.127272727272727","0","ENSMUSG00000044033"
"2037","","",,,"Slc35g1","false","false","Cluster 3","Clustered","8.076923076923077","0","ENSMUSG00000044026"
"1012","","",,,"Boc","false","false","Cluster 3","Clustered","7.2727272727272725","0","ENSMUSG00000022687"
"2036","","",,,"Adgrd1","false","false","Cluster 3","Clustered","7.644444444444445","0","ENSMUSG00000044017"
"2034","","",,,"Slc36a4","false","false","Cluster 3","Clustered","7.912087912087912","0","ENSMUSG00000043885"
"1009","","",,,"Scgn","false","false","Cluster 3","Clustered","7.2727272727272725","0","ENSMUSG00000021337"
"2030","","",,,"Sptssb","false","false","Cluster 3","Clustered","6.871794871794871","0","ENSMUSG00000043461"
"1002","ARCHS4 Coexpression,21;Enrichr Queries,2;GTEx Coexpression,72","CNTFR,STMN3,ABAT,SOGA1,SAMD14,DPYSL5,DPYSL3,KIF21B,NCKAP5,CHGB,RBFOX3,UNC5A,MAPK8IP2,MAPK8IP1,GPR162,MAP1B,LGALS12,TRIM11,TTYH1,STXBP1,PIK3R3,TTBK1,PCBP4,MAP2,MAP6,B4GALNT1,RHBDL3,SCN3A,CARMIL3,PTPRN2,CADM4,ST8SIA3,FZD9,DCLK2,L1CAM,ST18,GNG13,GADD45G,PKIB,XKR7,PKIA,COL9A3,XKR4,PRR36,CDKN1C,PCSK1,BTG2,TMEM151B,KCNC1,TENM4,NCAN,DIRAS2,DOC2B,SHF,JPH4,MMP24,PCLO,TUBA1A,SLC22A17,TRIM3,DNER,NEFL,NEFM,KIF1A,RPS6KL1,ACTL6B,ANO8,PAX6,SYP,PROX1,MANEAL,AP3B2,CBFA2T3,TUBB2A,PXDN,KCNMA1,MAPT,KCNA1,FAXC,SEZ6,CXCR4,GPC2,APBB1,PAK3,GABRD,PURG,RUNX1T1,ARNT2,KCNB1,KLHL3,SORBS2,NMNAT2,TUBB4A,STXBP5L,KIF26B,PCDHB16,RIMBP2,TMEM229B,CDK5R1,RAB3C,RORA,CELSR1,CELSR3,SLC8A1,RIMS2,DACH1,FGF9,SALL2,CDH2,KIF5C,BASP1,PALM,TNR,PPFIA4,KCNH2,TLE2,SEMA6A,IGFBP5,TMEM178B,SEMA6D,APLP1,RUNDC3A,DISP2,CLIP3,ACAP3,OLFM1,CACNB3,RAB37,GPRIN1,MADD,SCG5,SCG3,SCG2,BRSK1,BRSK2,NDRG4,SHC2,KHDRBS3,CACNA1B,CACNA1A,NREP,CACNA1C,CPLX2,CACNA1H,RAP1GAP,PHF21B,NEUROD1,IGSF21,NEUROD2,ADGRG1,NPTX1,KIF3C,NPTX2,RAB6B,PLXNA4,ASIC1,SYT5,TMEM120B,TCAF1,CORO2B,SYT7,GNAO1,REEP1,REEP2,CPE,CNIH2,MAP3K12,SNAP25,PODXL2,MTCL1,RASGRF1,CELF3,PKD1,SYNE1,UNC80,GRM4,MCF2L,GDAP1L1,CEP170,SULT4A1,ARFGEF3,TRIM67,ADGRV1,PIANP,ABCC8,ETV1,OLIG1,FAM219A,KCNAB3,PTP4A3,SETBP1,DDAH2,SHANK2,CAMK2B,CRMP1,PPM1E,CXXC4,AURKB,NCALD,DLL3,ABLIM1,GNG2,GNG4,SV2A,SPOCK2,MVB12B,SLIT1,CCDC184,CACNG4,CHGA,MARCKSL1,PCDHGC4,CADPS,SYT13,MEIS2,MAB21L3,SLC4A8,NFASC,SYT11,NOVA2,INSM1,UNC79","9","31.67","Myt1","false","false","Cluster 3","Clustered","8.076923076923077","0","ENSMUSG00000010505"
"998","","",,,"Casp14","false","false","Cluster 3","Clustered","8.333333333333334","0","ENSMUSG00000005355"
"997","","",,,"Prlr","false","false","Cluster 3","Clustered","7.418181818181818","0","ENSMUSG00000005268"
"2019","","",,,"Nmnat2","false","false","Cluster 3","Clustered","7.0","0","ENSMUSG00000042751"
"2017","","",,,"Wbp5","false","false","Cluster 3","Clustered","7.0","0","ENSMUSG00000042712"
"2016","","",,,"Jph1","false","false","Cluster 3","Clustered","7.822222222222222","0","ENSMUSG00000042686"
"2012","","",,,"Cpa6","false","false","Cluster 3","Clustered","7.644444444444445","0","ENSMUSG00000042501"
"2007","","",,,"Pm20d1","false","false","Cluster 3","Clustered","8.181818181818182","0","ENSMUSG00000042251"
"2004","","",,,"Klhl23","false","false","Cluster 3","Clustered","7.822222222222222","0","ENSMUSG00000042155"
"979","","",,,"Rassf10","false","false","Cluster 3","Clustered","7.0","0","ENSMUSG00000098132"
"2003","","",,,"2010003K11Rik","false","false","Cluster 3","Clustered","8.318181818181818","0","ENSMUSG00000042041"
"978","","",,,"Tmem151b","false","false","Cluster 3","Clustered","8.318181818181818","0","ENSMUSG00000096847"
"2002","","",,,"Spidr","false","false","Cluster 3","Clustered","7.466666666666667","0","ENSMUSG00000041974"
"2001","","",,,"Mfsd9","false","false","Cluster 3","Clustered","7.644444444444445","0","ENSMUSG00000041945"
"973","","",,,"Cecr6","false","false","Cluster 3","Clustered","7.644444444444445","0","ENSMUSG00000094626"
"1996","","",,,"Coro2b","false","false","Cluster 3","Clustered","7.822222222222222","0","ENSMUSG00000041729"
"970","","",,,"Vgll3","false","false","Cluster 3","Clustered","7.822222222222222","0","ENSMUSG00000091243"
"969","","",,,"Lrrc10b","false","false","Cluster 3","Clustered","7.03030303030303","0","ENSMUSG00000090291"
"966","","",,,"Gm13420","false","false","Cluster 3","Clustered","7.0","0","ENSMUSG00000079497"
"1989","ARCHS4 Coexpression,20;Enrichr Queries,19;GTEx Coexpression,61","CNTFR,SPARC,STMN3,ABAT,SAMD14,DPYSL5,DPYSL3,CYP1B1,SOX9,KIF21B,CCDC92,IER3,EPHA5,UNC5A,MAPK8IP2,CPT1C,HPCAL4,HSPG2,DKK3,MAPK8IP1,MAP1B,MAP1A,MYL9,CTXN1,STX1A,PFN2,NUMBL,NRN1,EPAS1,MAGED1,STXBP1,C2CD4C,PCDH19,TTBK1,PGBD5,MAP2,PCBP4,MAP6,SPTBN2,JUN,CADM4,PLK2,FN1,IGF2,FZD9,DCLK2,L1CAM,MEX3B,COL1A2,PRR36,ITM2C,CDKN1C,COL18A1,BTG2,TMEM151B,PTPRN,DIRAS1,SLC35F1,ROBO1,JPH4,SERP2,C1QTNF1,TUBA1A,CAMKV,SLC22A17,TIMP2,IDS,TIMP3,KIF1A,DLGAP4,PSD,BGN,SYP,SYN2,SYN1,TUBB2A,MMP17,PXDN,KCNMA1,ARHGEF4,MAPT,GAS6,PDZRN3,VAMP2,DBN1,RAPGEF4,NAPB,TAGLN,PLPPR2,PRUNE2,CXCR4,CRIP2,CAMK2N1,GPC1,GPC2,MSX1,CKB,APBB1,RUNX1T1,GABBR2,ARNT2,GSN,FAM189A1,NMNAT2,DHRS3,SULF2,GRIN1,COL3A1,MORN4,ABI2,KIF26B,PCDHB16,FOSB,APBA1,CDK5R1,IRS1,CELSR1,ETS1,CLU,CELSR3,RGS4,EFEMP2,RIMS4,CDH2,KIF5C,PLAU,BASP1,PALM,TNR,FADS1,TGM2,SEMA6B,KCNH3,TLE2,POSTN,SEMA6A,IGFBP5,TMEM178B,WNT5A,APLP1,TTC7B,RUNDC3A,CLIP3,OLFM1,ACAP3,CACNB3,COL4A2,COL4A1,GPRIN1,SCG3,RTN2,BRSK1,SHC2,BRSK2,NDRG4,ARHGEF25,ABHD8,CACNA1A,NREP,NDRG1,CACNA1H,PHF21B,PDZD4,ADGRG1,KIF3C,RAB6B,PACSIN1,PRNP,SYT3,CBX6,TGFB2,TCAF1,TMEM132A,CORO2B,SYT7,GNAO1,CXCL10,DLG4,REEP2,BHLHE40,CPE,CNIH2,GPSM1,PODXL2,CELF3,HSPB1,PKD1,PTER,SCRN1,GDAP1L1,ERC2,SULT4A1,DACT1,ADAMTS7,PIANP,PLAUR,FAM219A,MYRIP,DNM1,ARL4C,PTP4A3,COL6A1,CDH13,LEF1,CRMP1,LRP3,CXXC5,THBS1,AURKB,NCALD,GNG2,SV2A,SLIT1,FSD1,NCAM2,CCDC184,COL26A1,MARCKSL1,CMTM3,KCNIP3,LIMK1,CCK,SYT13,MEIS2,MAPK11,NFASC,SYT11,NOVA2,COL7A1","10","33.33","Meis3","false","false","Cluster 3","Clustered","7.644444444444445","0","ENSMUSG00000041420"
"963","","",,,"Ly6c1","false","false","Cluster 3","Clustered","7.822222222222222","0","ENSMUSG00000079018"
"1983","","",,,"Trim62","false","false","Cluster 3","Clustered","7.5636363636363635","0","ENSMUSG00000041000"
"958","","",,,"Nrarp","false","false","Cluster 3","Clustered","7.973856209150327","0","ENSMUSG00000078202"
"955","","",,,"Cd80","false","false","Cluster 3","Clustered","8.318181818181818","0","ENSMUSG00000075122"
"954","","",,,"Fjx1","false","false","Cluster 3","Clustered","7.822222222222222","0","ENSMUSG00000075012"
"1974","","",,,"Plekhg1","false","false","Cluster 3","Clustered","7.912087912087912","0","ENSMUSG00000040624"
"942","","",,,"38596","false","false","Cluster 3","Clustered","7.466666666666667","0","ENSMUSG00000072214"
"1965","","",,,"Fmo1","false","false","Cluster 3","Clustered","7.644444444444445","0","ENSMUSG00000040181"
"937","","",,,"Tmem139","false","false","Cluster 3","Clustered","7.7142857142857135","0","ENSMUSG00000071506"
"935","","",,,"Trabd2b","false","false","Cluster 3","Clustered","8.307692307692308","0","ENSMUSG00000070867"
"933","","",,,"Fryl","false","false","Cluster 3","Clustered","7.151515151515151","0","ENSMUSG00000070733"
"1954","","",,,"Plekhg5","false","false","Cluster 3","Clustered","7.813186813186814","0","ENSMUSG00000039713"
"1953","ARCHS4 Coexpression,421;GTEx Coexpression,1302","RNF11,ITGB5,GBE1,TGFB1I1,PLOD2,PEAR1,SLC2A6,ELK3,MYLK,SAMD14,TUBB6,CHCHD3,GRB14,CCRL2,SACS,CAPN2,CCDC92,PLA2G12A,TNFRSF12A,ZBTB38,ANXA5,F2R,PLAUR,TMEM40,ANO6,REXO2,RCN1,ADORA2A,RAB37,LGALS12,VDAC1,PLEKHO1,PDE5A,KDELR3,KIFC3,MGLL,CD63,SEC23A,SLC35D3,GMPR,ARHGAP18,SRR,SNN,CYB5R3,PRKAR2B,IGF2BP2,MFAP3L,CDKN2D,TRIM40,SMOX,FN1,HMGA2,VEGFC,RAB27B,PDZK1IP1,BMP6,DCBLD2,FOSL1,DAP,XK,P4HA1,UBXN11,TNIP3,ESAM,TUBA8","1004","861.5","Msantd3","false","false","Cluster 3","Clustered","7.418181818181818","0","ENSMUSG00000039693"
"1949","","",,,"6430573F11Rik","false","false","Cluster 3","Clustered","7.2727272727272725","0","ENSMUSG00000039620"
"924","","",,,"Trp53i11","false","false","Cluster 3","Clustered","8.192307692307692","0","ENSMUSG00000068735"
"922","","",,,"Efcab1","false","false","Cluster 3","Clustered","7.644444444444445","0","ENSMUSG00000068617"
"920","","",,,"Col8a1","false","false","Cluster 3","Clustered","7.418181818181818","0","ENSMUSG00000068196"
"1944","","",,,"Dse","false","false","Cluster 3","Clustered","7.418181818181818","0","ENSMUSG00000039497"
"1943","","",,,"Dusp10","false","false","Cluster 3","Clustered","6.871794871794871","0","ENSMUSG00000039384"
"918","","",,,"Ppp1r3c","false","false","Cluster 3","Clustered","7.973856209150327","0","ENSMUSG00000067279"
"912","","",,,"Plcxd1","false","false","Cluster 3","Clustered","8.161764705882353","0","ENSMUSG00000064247"
"911","","",,,"Chil1","false","false","Cluster 3","Clustered","7.912087912087912","0","ENSMUSG00000064246"
"1935","","",,,"Akap7","false","false","Cluster 3","Clustered","7.813186813186814","0","ENSMUSG00000039166"
"1933","","",,,"Fam102a","false","false","Cluster 3","Clustered","8.192307692307692","0","ENSMUSG00000039157"
"1932","","",,,"Itga9","false","false","Cluster 3","Clustered","7.151515151515151","0","ENSMUSG00000039115"
"904","","",,,"Eno1","false","false","Cluster 3","Clustered","7.03030303030303","0","ENSMUSG00000063524"
"902","","",,,"Acadm","false","false","Cluster 3","Clustered","7.912087912087912","0","ENSMUSG00000062908"
"1925","","",,,"9130409I23Rik","false","false","Cluster 3","Clustered","7.151515151515151","0","ENSMUSG00000038768"
"901","","",,,"Atp5g2","false","false","Cluster 3","Clustered","7.5636363636363635","0","ENSMUSG00000062683"
"1920","","",,,"Mvb12b","false","false","Cluster 3","Clustered","7.418181818181818","0","ENSMUSG00000038740"
"1918","Literature ChIP-seq,160;ARCHS4 Coexpression,1206;Enrichr Queries,326;GTEx Coexpression,143","MDC1,SPARC,AQP9,TESK2,SMC4,IFIT3,MYLK,LGALS3,LIPE,CHEK2,DPYSL3,LONP1,DAG1,CYP1B1,SOX9,HOXA5,WLS,HOXA4,IER3,HES7,EPHA4,EPHA7,PAQR7,AFAP1,RNASE4,ACSL3,HSPG2,EML1,DEPDC1B,HOXB9,KATNAL1,RBP2,KCNQ4,HOXB3,KCTD12,HOXB8,ATP6V0D1,MYL9,PRR11,ACOT4,ASF1B,CDCA2,RWDD2A,IGSF3,EPAS1,GATA4,CFP,RACGAP1,RDH11,PRKAR2B,ST3GAL4,SARAF,TSPAN2,B4GALNT1,CDR2,PLK4,NGFR,JUN,LRRN3,MTERF2,FZD7,FN1,IGF2,FZD9,EIF2AK3,RAB27A,RAB27B,SLC16A10,SLC16A13,FOSL1,EHD2,TPX2,COL1A2,ECHDC1,FERMT2,ITM2C,XKR5,COL18A1,NRP2,TGFB1I1,ZFAND2A,HIF3A,GLIPR1,C1QTNF1,ADAMTSL4,DNER,TIMP3,TCP11L2,CD53,EDN1,ANXA1,CNOT6L,TNFRSF12A,IFNGR1,SLC39A10,ANO6,PAX6,NME5,SIRT3,RAD51B,NCOR1,KCNMA1,PXDN,CKS2,PLEKHO1,RAPGEF5,TKT,PDZRN3,MGLL,SDCCAG8,TAGLN,ECHS1,PKN3,PRUNE2,FAM129A,CXCR4,PTGS2,CENPA,RNF135,UCP2,SC5D,MSX1,RUNX1T1,BCHE,CDKN2B,AOC1,GSN,SLC16A1,PKLR,TMEM62,DHRS3,SULF2,KBTBD3,COL3A1,KRT18,HIST3H2A,OSTM1,ABI2,KIF26B,TCEA2,MSRB3,FOSB,NCAPD2,ESYT1,CD68,MAD2L1,FOXA1,CSF1,GOLT1A,NRM,PLAT,CELSR1,ETS1,SYDE2,RDM1,TUBB6,DACH1,DEPTOR,CHCHD3,SCMH1,LAMP2,NUDT19,SLC39A6,NEK2,RGS9,FADS1,TGM2,KCNH2,WNT5B,IGFBP5,FST,WNT5A,F2R,IPMK,ARID5A,MID1,PLA2G15,HIC2,SELENOM,MYCN,COL4A2,COL4A1,S100A6,AJUBA,SLC27A2,BLM,ARHGEF25,ARL6,NPR1,CACNA1A,GSTT2,ARHGAP18,CACNA1C,HMMR,NDRG1,COX7A1,CACNA1H,ASIC5,CALD1,PMVK,FAM83D,ASIC1,CRTAP,TGFB2,OSBPL5,RBPMS,HMGA1,TRPV2,HMGA2,KLHL23,SSC5D,COQ9,BMP3,CXCL10,PTPRC,CCPG1,PQLC3,BHLHE40,DNAJC10,PHF19,ARHGAP11A,ABCD4,HSPB1,PTPN22,SLC2A6,PITPNC1,LMNB1,FLCN,DBP,ACP6,BOC,PGM2,ME2,IFT57,SLC37A4,LBR,PLEKHG3,SLC13A2,CHPF2,PLAUR,KCNAB3,BET1L,ARL4C,ACTA2,TGFBR3,ALDH1A3,ASPM,PTP4A3,IMPACT,PKM,IRF1,COL6A1,BMP2K,RBMS1,PDE5A,DTL,LAMA5,CEBPA,KDM3A,SEC23A,ACSS2,SEMA3C,CCDC69,LAMA4,FGL2,LEF1,SEMA3E,THBS1,AURKB,AP3M2,RAB23,POLD1,NT5DC3,SLIT1,TRIM47,SLIT2,PDLIM4,ALOXE3,BUB1,SLC12A4,PRRX1,TPBG,MEIS2,TICRR,SLC4A7,RPIA","453","458.8","Hoxb4","false","false","Cluster 3","Clustered","7.897435897435898","0","ENSMUSG00000038692"
"893","","",,,"Krt79","false","false","Cluster 3","Clustered","7.0","0","ENSMUSG00000061397"
"1915","","",,,"Sct","false","false","Cluster 3","Clustered","6.9743589743589745","0","ENSMUSG00000038580"
"891","","",,,"Ipmk","false","false","Cluster 3","Clustered","8.076923076923077","0","ENSMUSG00000060733"
"889","","",,,"Zfp128","false","false","Cluster 3","Clustered","7.2727272727272725","0","ENSMUSG00000060397"
"886","","",,,"Nptx2","false","false","Cluster 3","Clustered","7.644444444444445","0","ENSMUSG00000059991"
"883","","",,,"Fdps","false","false","Cluster 3","Clustered","8.181818181818182","0","ENSMUSG00000059743"
"1905","","",,,"Chpf2","false","false","Cluster 3","Clustered","8.192307692307692","0","ENSMUSG00000038181"
"879","","",,,"Mamld1","false","false","Cluster 3","Clustered","8.076923076923077","0","ENSMUSG00000059401"
"877","","",,,"Kcnc1","false","false","Cluster 3","Clustered","8.161764705882353","0","ENSMUSG00000058975"
"875","","",,,"Dhcr7","false","false","Cluster 3","Clustered","7.2727272727272725","0","ENSMUSG00000058454"
"874","","",,,"Espl1","false","false","Cluster 3","Clustered","7.813186813186814","0","ENSMUSG00000058290"
"1896","","",,,"Bri3bp","false","false","Cluster 3","Clustered","7.912087912087912","0","ENSMUSG00000037905"
"872","","",,,"Eml1","false","false","Cluster 3","Clustered","8.318181818181818","0","ENSMUSG00000058070"
"871","","",,,"Sh3rf2","false","false","Cluster 3","Clustered","7.7142857142857135","0","ENSMUSG00000057719"
"1893","","",,,"Fam13a","false","false","Cluster 3","Clustered","8.076923076923077","0","ENSMUSG00000037709"
"867","","",,,"Hist3h2ba","false","false","Cluster 3","Clustered","7.973856209150327","0","ENSMUSG00000056895"
"866","","",,,"Ttc26","false","false","Cluster 3","Clustered","7.2727272727272725","0","ENSMUSG00000056832"
"1889","","",,,"Shank2","false","false","Cluster 3","Clustered","7.466666666666667","0","ENSMUSG00000037541"
"1888","","",,,"Cib2","false","false","Cluster 3","Clustered","7.813186813186814","0","ENSMUSG00000037493"
"1887","","",,,"Paqr7","false","false","Cluster 3","Clustered","8.010989010989011","0","ENSMUSG00000037348"
"861","","",,,"Snx32","false","false","Cluster 3","Clustered","7.973856209150327","0","ENSMUSG00000056185"
"859","","",,,"Irs1","false","false","Cluster 3","Clustered","7.912087912087912","0","ENSMUSG00000055980"
"1880","","",,,"Aifm1","false","false","Cluster 3","Clustered","7.5636363636363635","0","ENSMUSG00000036932"
"855","","",,,"Ldoc1l","false","false","Cluster 3","Clustered","7.151515151515151","0","ENSMUSG00000055745"
"1878","","",,,"Prodh2","false","false","Cluster 3","Clustered","7.7142857142857135","0","ENSMUSG00000036892"
"853","","",,,"Zfp78","false","false","Cluster 3","Clustered","7.03030303030303","0","ENSMUSG00000055150"
"849","","",,,"Cadm4","false","false","Cluster 3","Clustered","6.871794871794871","0","ENSMUSG00000054793"
"848","","",,,"Mtnr1a","false","false","Cluster 3","Clustered","7.457142857142857","0","ENSMUSG00000054764"
"846","","",,,"Pabpc1l","false","false","Cluster 3","Clustered","7.644444444444445","0","ENSMUSG00000054582"
"1866","","",,,"Lzts1","false","false","Cluster 3","Clustered","7.846153846153847","0","ENSMUSG00000036306"
"841","","",,,"1700016K19Rik","false","false","Cluster 3","Clustered","7.822222222222222","0","ENSMUSG00000053783"
"840","ARCHS4 Coexpression,1537;GTEx Coexpression,617","TRIM72,CLIC5,HMGB2,ETFA,LDB3,SLC2A4,TMEM143,KBTBD13,GYS1,CSRP2,FAM162A,STBD1,TMEM38A,ACADM,DLAT,EPM2A,SUN2,DUSP3,TPI1,ADPRHL1,MIF,SDHA,SDHB,FAM210A,OBSCN,RILPL1,RRAGD,ADSSL1,CKS2,NDUFS2,VDAC1,UQCRC2,BEX3,PRKAA2,SMPX,SLCO5A1,SRL,COX7A1,ASB16,TCEAL8,LDHB,HES1,CYC1,MSX1,COX10,SH3BGR,AAMDC,CAP2,MDH2,WWP1,COQ9,PPP2R3A,COQ5,NT5C1A,ACO2,RTN4IP1,COQ8A,MAD2L1","1258","1077.0","Chchd3","false","false","Cluster 3","Clustered","8.192307692307692","0","ENSMUSG00000053768"
"1859","","",,,"Hist1h1c","false","false","Cluster 3","Clustered","8.076923076923077","0","ENSMUSG00000036181"
"833","","",,,"Sec61b","false","false","Cluster 3","Clustered","7.7142857142857135","0","ENSMUSG00000053317"
"1856","","",,,"Fmnl2","false","false","Cluster 3","Clustered","7.961538461538462","0","ENSMUSG00000036053"
"828","","",,,"Arhgef15","false","false","Cluster 3","Clustered","8.0","0","ENSMUSG00000052921"
"825","ARCHS4 Coexpression,1098;Enrichr Queries,61;GTEx Coexpression,483","FOXA1,RORA,CELSR1,ETS1,CLU,CELSR3,CHEK2,ADORA1,DAG1,CYP1B1,KIF21B,SOX9,CHGB,EPHB3,TSPYL2,KCNH2,EPHA4,KCNH3,UNC5A,IGFBP5,KCNH6,DNAAF3,LIMCH1,IGFBP2,SPNS2,P3H3,TMEM130,FAM227A,OLFM1,MYCN,RAB36,LGALS12,SCG5,SCG2,CTXN1,BEX3,NUMBL,CUL7,BEX2,NRN1,MAGED1,EPAS1,NXPH4,CACNA1A,NDRG1,CACNA1H,RAP1GAP,PHF21B,GLIS2,DYNC2LI1,GHRHR,MAATS1,PCSK1N,ZMAT1,PGBD5,MAP6,HIVEP3,NPTX1,RHBDL3,NPTX2,PLXNA4,ZBTB7C,SPTBN2,BBS1,NGFR,SMCP,MYH7B,GSTM2,JUN,TGFB2,BDNF,LRRN2,FZD7,TMEM132A,FZD9,NFATC2,INHBB,EVX1,FBXO32,CORO2B,SYT7,GADD45G,GNAO1,AHI1,MEX3B,NR4A3,MYO5B,WNK2,BHLHE40,FAM187B,ID4,SP6,MAGED2,FAT4,PRR36,ITM2C,CDKN1C,BTG2,TENM4,PHF1,PTPRN,CELF3,HSPB1,CELF6,ADM,YBX2,NRARP,SLC22A17,MCF2L,WDR6,PACRG,LMNTD2,KSR2,WNT9A,PROX1,CBFA2T3,ETV5,TGFBR3,PTP4A3,VGF,PXDN,KIT,CDH13,MAPT,SHANK2,MGLL,MATN2,CAMK2B,HCN4,CEBPA,COL11A2,CRMP1,CXCR4,CRIP2,SEMA3F,CXXC5,THBS1,AURKB,RASD2,NEURL1B,RXRA,DZANK1,CAMK2N1,ATOH8,ASPDH,PAK3,P4HTM,RUNX1T1,RIC3,EGLN3,KCNB1,SYT13,SORL1,MEIS2,SORBS3,GCK,DHRS3,KBTBD11,BAIAP3,POMC,SLC4A8,TTC8,KIF26B,RIMBP2,CFAP36,FOSB,B9D1,INSM1,UNC79","589","547.3","Foxo6","false","false","Cluster 3","Clustered","8.03921568627451","0","ENSMUSG00000052135"
"823","","",,,"Rgs14","false","false","Cluster 3","Clustered","7.813186813186814","0","ENSMUSG00000052087"
"822","","",,,"Casr","false","false","Cluster 3","Clustered","7.644444444444445","0","ENSMUSG00000051980"
"1846","","",,,"Ugt2a3","false","false","Cluster 3","Clustered","7.466666666666667","0","ENSMUSG00000035780"
"821","ARCHS4 Coexpression,783;Enrichr Queries,668;GTEx Coexpression,1369","MDC1,PANK3,MT-ND5,IRS1,PLOD2,CBLB,RORA,NR3C1,CELSR1,MKI67,ETS1,SMC4,SLC8A1,BASP1,CHEK2,MYB,PLS3,SOX9,ACAD11,FADS1,HOXA5,TGM2,EPHA4,COX6B2,TERB1,HIC2,OBSCN,HOXB9,SOAT2,LGALS12,ANKS6,TRIM11,PFKFB3,EPAS1,ARHGAP19,CACNA1A,LPL,PIK3R3,NCAPG,PLCXD1,NDRG1,NLRP6,H1FX,MORC1,PPARGC1A,RAB11FIP5,GSTM3,JUN,TGFB2,FZD7,CRIM1,FZD9,ZBTB10,NR1D1,GADD45G,TDRD1,CXCL10,MEX3B,NR4A3,BHLHE40,REEP6,PIWIL2,BTG2,THRB,TENM4,GBE1,YBX2,SLC7A11,HIF3A,PYGL,KIF11,SYNE2,ROBO1,LMNB1,C1QTNF1,DUSP10,LBR,HELLS,ADGRV1,MME,IL15,KIF24,ETV1,IQCD,PROX1,MASTL,SYNGR4,ANO3,PTP4A3,ESPL1,ZPBP2,PXDN,TLR4,DTL,ITIH5,PRKAA2,PKN3,DNAH5,CXCR4,HOXD13,PTGS2,USP18,AURKB,ABLIM1,POLD1,RAD54L,IARS2,RBBP7,EGLN3,MOCOS,FMO4,POU4F1,DHRS3,SULF2,TICRR,PCDHB16,FOSB,NCAPD2","1082","940.0","Prdm9","false","false","Cluster 3","Clustered","7.03030303030303","0","ENSMUSG00000051977"
"1843","","",,,"Grhpr","false","false","Cluster 3","Clustered","8.192307692307692","0","ENSMUSG00000035637"
"1841","","",,,"Galm","false","false","Cluster 3","Clustered","8.192307692307692","0","ENSMUSG00000035473"
"1840","Literature ChIP-seq,23;ARCHS4 Coexpression,396;ENCODE ChIP-seq,35;Enrichr Queries,262;ReMap ChIP-seq,58;GTEx Coexpression,689","CHIC1,TESK2,ABAT,ENO1,CLDN1,SLC4A4,TMEM92,TSKU,ELK3,GJA1,CREB3L4,MYB,CYP1B1,HOXA5,MNX1,HOXA4,IER3,GAMT,UNC5A,RBFOX3,DAPK1,DNAAF1,SERPINF2,AFAP1,RNASE4,HSPG2,SYTL2,DEPDC1B,CLDN4,RBP4,RNF125,WDR81,JTB,UQCRC2,PRR11,MYL9,ASF1B,PIF1,LIPT1,ENPEP,CDCA2,SLCO5A1,SLC30A10,ADH4,CRACR2A,CRACR2B,RDH11,PPARGC1A,S100A11,SLC19A2,CDK17,JUN,FZD3,GSDMA,ABCA5,NEBL,TIPARP,FN1,EIF2AK3,NFATC3,ERLIN1,NFATC2,SLC16A10,NR1D1,NR0B2,A1CF,PGA5,ALS2CR12,COL1A2,GJB1,FXYD3,AGO4,PKIA,FERMT2,MESP2,RET,BTG2,ARHGAP8,LRRC3,ADM,PYGL,TFCP2L1,JPH1,LRRC31,SHF,TMEM189,SULT1C2,TUBA1B,SHH,FAM102A,IMPA2,TCP11L2,TK1,DLGAP4,EDARADD,TEAD4,RMI2,LEFTY1,ANXA1,CNOT6L,ANXA3,ELOVL2,MYOF,SLC39A10,ELOVL6,F2,SLC39A14,PTGR2,GCHFR,BACE1,BACE2,GPRC5B,FAM234B,SLC7A7,NCOR1,INF2,PLCB4,HEATR5A,BDH1,PXDN,RAPGEF5,PLCB1,VAMP2,RAPGEF4,SAMD5,OAT,PHLPP1,ATL1,PRUNE2,GCNT1,FAM129A,AFM,DLST,AFP,PTGS2,FAM214A,PAPSS2,FAM117B,FAM129B,RASSF10,AGR2,AGA,CKB,RNF130,SPDEF,CDKN2D,EGLN1,CENPU,BCHE,EGLN3,CDKN2B,GSN,BIK,GLYCTK,GSR,NR1H3,WWP1,TMCO4,FMO4,FMO5,DHRS3,AGT,GUCA2A,AGMAT,SULF2,FABP1,DHRS7,COL3A1,SLCO3A1,LPCAT3,FOSB,COQ8A,TMEM229A,SLC28A2,LGR5,SLC28A1,YPEL3,FRYL,HSPA1B,RAB3C,ANKRD37,OLFML2B,EXOC3L4,IRS1,NAB2,FAM13A,PLOD2,CLU,HID1,RIMS2,EFEMP1,DEPTOR,ZFP30,SESN1,SLC39A6,NEK1,NEK2,PIM2,HMGN3,SLC16A5,CD177,KCNH2,RAB2B,IGFBP5,DGAT1,KCNH6,FST,SEMA6D,IGFBP2,PIPOX,MITF,FRMD4A,NEAT1,CASD1,CDC25C,MYT1,SLC9B2,RAB30,MTNR1A,MELK,RAB36,NAAA,MADD,S100A6,ADAM8,IGFALS,PHLDB2,SLC27A2,SQSTM1,SLC27A5,PFKFB1,REG3A,SHC2,PFKFB4,CEMIP,PARM1,ABHD8,ITPR1,GPR85,ITPR2,LIN7A,SLC9A3R2,TKFC,PMVK,PGK1,HACL1,IGFBP7,CPA6,SRGAP1,SLC14A2,SDF2L1,OSBPL6,BTN2A2,OSBPL2,TMEM132A,ZBTB10,FBXO32,CXCL10,PTPRE,BFSP1,GGCX,REEP5,RCAN3,DMXL2,MDM2,CDK1,SP5,MAFK,RNF186,PLEKHM3,PIWIL2,PSCA,ITGB5,LEAP2,CDCA7L,AKAP8L,ARRB1,NRARP,CELF6,ZC3H6,TSPAN12,NADK2,DUSP10,LBH,SGCB,DDI2,DSE,UGT2A3,UPP1,SLC37A3,BCAS1,SMIM14,SLC13A2,PLA2G12B,PEG3,KSR1,CHPF2,APOA1,REXO2,DUSP22,PTP4A3,PKM,TFDP2,MEP1A,ASPG,ANG,EVL,ACPP,SLC25A13,ST6GALNAC6,CEBPA,RNF32,PLEKHH2,ACSS2,SEMA3C,LRP1,CCDC68,FGL2,SEMA3E,LRP3,SEMA3F,CXXC5,CXXC4,THSD4,SELENBP1,ZNRF1,ABLIM1,DCAF17,RNF39,MAL2,IARS2,BAK1,ACSS1,ALOXE3,CACNG4,TRPA1,RNF24,KCNJ11,MMAB,CCDC58,AHNAK2,MBOAT2,APOC3,FOXJ1,MBOAT4,TTC39C,PTPN13,TPD52L1,SORL1,PTPN14,TTC39A,KBTBD11,BAIAP3,MAB21L3,KLF7,PFKL,SERHL,SPAG1,PPP1R14D,SPON2,PANK3,FAM89B,PANK1,DIXDC1,KLHDC7A,CBLB,GCC1,MKI67,NADSYN1,ZDHHC2,LGALS3,SYNPR,FRAT2,NIPAL2,CHEK2,RASSF6,TNFSF10,SOX9,THSD7A,ACAD11,SKP2,HABP2,EPHB3,PAQR9,PAQR7,LIMCH1,ACSL5,ACSL3,CMBL,OVOL2,CYP27A1,POR,CYP2U1,IFI27,SOAT2,VDAC1,KIF20B,EPHA1,PLPP3,CDS1,EPB42,MAOB,IGSF3,EPAS1,GIPR,PDE1B,CAPSL,STXBP1,MGST1,RACGAP1,MAP2,STC2,TSPAN4,FAM43A,TRPM6,MAP9,DECR1,SPTBN2,CARMIL2,FER1L4,DTNA,TNFSF15,RAB27B,RASSF9,SMARCA1,TRERF1,GADD45G,NET1,ATP4A,TPX2,AKR1B10,RAET1E,KLHDC8A,VNN3,CYP2S1,MYO5C,ID4,SPATS2L,MAGED2,ITM2C,SLC35F2,MOGAT2,SH3KBP1,SLC7A11,KIF11,PTPRH,WFDC2,HERPUD1,SERP2,PCLO,SH3PXD2A,CTSL,HNF4A,CTSK,ANKRD1,TMED3,QSOX1,FFAR2,CTSF,DLAT,LMCD1,TINAG,EDN1,ATP6V0B,PACRG,KIF24,GFRA1,PROX1,SYP,GFRA3,UGDH,ANO1,KIF9,NR5A2,KIT,TFF3,TFF2,ARHGEF4,CD302,PDZRN3,MATN2,TAGLN,PVT1,TMPRSS3,AMIGO2,SLC43A1,AKR1D1,CXCR4,AKAP7,CAPG,HSD17B6,NKD1,GNAI1,RASIP1,MFSD4A,RANBP3L,RXRA,OS9,CAMK2N1,TM4SF20,SPTSSB,XDH,CBR3,PURG,IL33,VEGFC,KLHL3,SORBS2,GRHL3,SORBS3,KBTBD3,NUDT7,KRT18,KLHL5,SGSM3,QPCT,KCNS3,KIF26B,PCDHB16,FKBP1B,GHRL,RTN4IP1,ESYT1,CD68,RAMP1,FOXA3,SPC24,MEGF9,FOXA1,SCARB1,FCGBP,ZFAND4,ZWILCH,GOLT1A,GALNT18,NRM,CPOX,JADE2,CELSR1,ETS1,SYDE2,RGS4,SCGN,CAPN8,PAIP2B,CHCHD3,TBC1D31,FAM162A,KIF5C,CCRL2,CAPN2,PDE8B,SBF2,TGM2,ABCG5,POSTN,G6PC,TTC7B,ARID5A,ANXA10,NPNT,PRLR,PDIA5,ERN1,ERN2,GLTPD2,TMEM135,SELENOS,COL4A1,SELENOP,SIDT1,LMX1B,NUPR1,AKNA,NPR1,NXPH4,PLD1,HIGD1A,NDRG1,CACNA1H,ACACA,CAMSAP2,RASGRP3,CALD1,ADGRG6,ISOC1,TBC1D14,TAC4,H1FX,MYH10,FAM83B,ASIC1,KLHDC2,PRNP,TGFB2,TCAF1,ACBD4,ARHGEF37,CRIM1,DNAJC12,HMGA2,INHBB,KLHL23,ARHGAP24,SYT7,ARHGAP23,EFNA1,TDRD1,ISG20,ARHGAP32,SEPSECS,BMP2,NAT8,AMACR,ATG16L2,DLG3,BAMBI,BHLHE40,EBPL,LRP11,MXD4,PHF19,PNLIPRP1,ABCD4,THRB,HMGB2,HSPB1,LAMC2,DBI,SLC2A5,PITPNC1,SLC2A7,RND1,TMEM220,FLCN,HEBP2,GRM4,IFT57,CFAP45,ARFGEF3,HIST1H1C,DDX58,H2AFV,ETV1,OLIG1,IQCD,GPCPD1,LSS,KLF15,CKAP4,ETV5,CCNA2,TGFBR3,ALDH1A3,CREB3,IRF1,EHHADH,CDHR1,ALDH1A1,RBMS1,CAMK2B,KDM3A,TUFT1,REP15,PLA2G1B,DNAH5,LAMA4,PALM3,LEF1,ADD3,TFPI,THBS1,AURKB,ASB16,AGPAT4,HSPD1,IFT74,ALDH1B1,GNG4,NT5DC3,ATOH8,ERBB2,STOM,HES1,BPNT1,CHGA,PLA2G2F,GALNT5,BNIP3,CADPS,PPP2R3A,MEIS2,MAPK15,CAPN13,SLC4A8,RSPH1,FMNL2,PIK3IP1,SARDH,CHPT1,GALM,SNTB1,ASB1","156","243.8","Foxa1","false","false","Cluster 3","Clustered","7.364705882352941","0","ENSMUSG00000035451"
"816","","",,,"Gja1","false","false","Cluster 3","Clustered","8.076923076923077","0","ENSMUSG00000050953"
"1837","","",,,"Hpse","false","false","Cluster 3","Clustered","7.2727272727272725","0","ENSMUSG00000035273"
"811","","",,,"Lgals3","false","false","Cluster 3","Clustered","8.38095238095238","0","ENSMUSG00000050335"
"810","","",,,"Ndufaf6","false","false","Cluster 3","Clustered","8.010989010989011","0","ENSMUSG00000050323"
"1834","","",,,"Shc4","false","false","Cluster 3","Clustered","8.318181818181818","0","ENSMUSG00000035109"
"1829","","",,,"Nrip3","false","false","Cluster 3","Clustered","8.0","0","ENSMUSG00000034825"
"1826","","",,,"Cnot6l","false","false","Cluster 3","Clustered","7.418181818181818","0","ENSMUSG00000034724"
"797","","",,,"Lix1l","false","false","Cluster 3","Clustered","8.0","0","ENSMUSG00000049288"
"1821","","",,,"Lrrn1","false","false","Cluster 3","Clustered","7.822222222222222","0","ENSMUSG00000034648"
"1820","","",,,"Hid1","false","false","Cluster 3","Clustered","8.235294117647058","0","ENSMUSG00000034586"
"1819","","",,,"Hsd17b13","false","false","Cluster 3","Clustered","8.192307692307692","0","ENSMUSG00000034528"
"794","","",,,"C1galt1c1","false","false","Cluster 3","Clustered","8.010989010989011","0","ENSMUSG00000048970"
"793","","",,,"Mrgpre","false","false","Cluster 3","Clustered","8.161764705882353","0","ENSMUSG00000048965"
"1814","","",,,"Emid1","false","false","Cluster 3","Clustered","7.644444444444445","0","ENSMUSG00000034164"
"1813","","",,,"Tpst1","false","false","Cluster 3","Clustered","7.961538461538462","0","ENSMUSG00000034118"
"786","ARCHS4 Coexpression,94;Enrichr Queries,364;GTEx Coexpression,952","FOXA1,CNTFR,CD80,GFI1,LY75,BUB1B,CPOX,STMN3,RORA,CELSR1,MKI67,TNF,CELSR3,GJA1,DACH1,FGF9,CDH2,KIF5C,DPYSL5,BASP1,CHEK2,DPYSL3,MYB,PALM,NUSAP1,TNFRSF8,KIF21A,TMEM38A,PLXNC1,SOX9,THSD7A,KIF21B,HOXA5,EPHA5,CHRNB1,EPHA4,IGFBP5,KCNH6,TMEM178B,CACNA2D1,VASH2,SHISA2,ISL1,MYT1,CACNB1,OLFM1,DEPDC1B,MYCN,ZC2HC1A,BIN1,GPRIN1,MAP1B,LGALS12,LMX1B,TNIK,PLA1A,ASF1B,BRSK2,NRN1,IGSF3,EPAS1,HVCN1,CACNA1B,CACNA1A,SLCO5A1,NREP,RASGRP3,PHF21B,NEUROD1,NEU3,PCBP4,MAP2,MAP6,NPTX1,KIF3C,RHBDL3,NPTX2,SCN3A,ASIC1,PLK4,NGFR,CCDC18,JUN,TGFB2,TCAF1,FZD3,OSBPL6,CADM4,BDNF,FZD9,HMGA2,DCLK2,NETO2,GADD45G,REEP1,CXCL10,SDK1,XKR7,BMP2,MEX3B,NR4A3,COL1A2,H2AFY2,LHX1,PKIA,BHLHE40,ID4,CDKN1C,RET,TRIM72,SNAP25,TENM4,ONECUT3,DIRAS1,CELF3,ADM,SLC7A11,SOBP,ROBO1,TUBA1A,GDAP1L1,NEFL,RAC3,NEFM,CEP170,KIF1A,TRIM67,HELLS,KLF12,ACTL6B,PAX6,FAM219A,PROX1,PTP4A3,PXDN,KIT,KCNMA1,MAPT,GAPDH,DTL,DBN1,CAMK2B,CEBPA,RGS16,FAXC,LEF1,GREB1L,CRMP1,CXCR4,HOXD13,TMEM163,COCH,AURKB,NCALD,ASB16,AGPAT4,GNG2,GNG4,CAMK2N1,MVB12B,BEND4,RAD54L,GPC2,MSX1,SLIT2,BUB1,CCDC184,E2F8,RUNX1T1,EGLN3,MARCKSL1,SYT13,NMNAT2,MEIS2,SLC8A3,ABI2,KIF26B,ASXL3,NOVA2,FOSB,NCAPD2,INSM1,LGR5,CDK5R1","477","470.0","Pou4f1","false","false","Cluster 3","Clustered","7.0","0","ENSMUSG00000048349"
"1808","","",,,"Tpsb2","false","false","Cluster 3","Clustered","8.318181818181818","0","ENSMUSG00000033825"
"1807","","",,,"Qsox1","false","false","Cluster 3","Clustered","8.076923076923077","0","ENSMUSG00000033684"
"2830","","",,,"#N/A","false","false","Cluster 3","Clustered","7.127272727272727","0","mmu-miR-101a-3p"
"779","","",,,"Rnf150","false","false","Cluster 3","Clustered","7.912087912087912","0","ENSMUSG00000047747"
"1801","","",,,"Igf2bp2","false","false","Cluster 3","Clustered","7.5636363636363635","0","ENSMUSG00000033581"
"1800","","",,,"Fa2h","false","false","Cluster 3","Clustered","7.644444444444445","0","ENSMUSG00000033579"
"775","","",,,"Dusp18","false","false","Cluster 3","Clustered","7.127272727272727","0","ENSMUSG00000047205"
"2822","","",,,"#N/A","false","false","Cluster 3","Clustered","7.125","0","mmu-miR-20b-5p"
"1796","","",,,"Dpyd","false","false","Cluster 3","Clustered","8.076923076923077","0","ENSMUSG00000033308"
"770","ARCHS4 Coexpression,63;GTEx Coexpression,85","CNTFR,CHPF,ROGDI,STMN3,SOGA1,CLU,CELSR3,HID1,SAMD14,FGF9,KIF5C,PALM,ADORA1,PPFIA4,RBFOX3,PAQR4,IGFBP2,APLP1,SHISA4,MAPK8IP2,MYT1,MAPK8IP1,DISP2,CLIP3,ACAP3,GPR162,OLFM1,RAB37,MAP7D1,MADD,MAP1A,TBC1D24,CTXN1,BRSK1,BRSK2,SHC2,NDRG4,ARHGEF25,STXBP1,CACNA1B,CACNA1A,NREP,CPLX2,NDRG2,TTBK1,CACNA1H,NEUROD1,IGSF21,NEUROD2,PDZD4,PCBP4,B4GALNT1,H1FX,NPTX1,RAB6B,PACSIN1,CARMIL3,CADM4,TMEM132A,DCLK2,CORO2B,MT3,ST18,SYT7,GNAO1,PKIB,XKR7,DAB1,DLG4,CNIH2,PRR36,MXD4,ITM2C,GPSM1,SNAP25,TMEM151B,KCNC1,THRA,MTCL1,DIRAS1,RASGRF1,DIRAS2,HSPB1,PKD1,SHF,UNC80,JPH4,MMP24,PCLO,GRM4,SCRN1,SLC22A17,MCF2L,TRIM3,RAC3,KIF1A,CTSF,ARFGEF3,TRIM67,DLGAP4,RPS6KL1,ITPK1,ETV1,PAX6,FAM219A,GFRA1,SYP,KCNAB3,AP3B2,CBFA2T3,DNM1,SYN1,GPRC5B,DDAH2,MAPT,VAMP2,CAMK2B,KCNA1,LRP3,CRIP2,TMEM163,PHYHIP,CST3,ZNRF1,SLC25A29,SV2A,TRIM47,APBB1,GABRD,MAPK4,CACNG4,PURG,MARCKSL1,PCDHGC4,KLHL3,NMNAT2,TUBB4A,STXBP5L,ALDH4A1,MAPK11,PFKL,SYT12,RAB15,SYT11,TCEA2,UNC79,TMEM229B","27","74.0","Cxxc5","false","false","Cluster 3","Clustered","7.908496732026143","0","ENSMUSG00000046668"
"769","","",,,"Ticrr","false","false","Cluster 3","Clustered","7.418181818181818","0","ENSMUSG00000046591"
"763","","",,,"Rprml","false","false","Cluster 3","Clustered","7.5636363636363635","0","ENSMUSG00000046215"
"759","","",,,"Paip2b","false","false","Cluster 3","Clustered","7.418181818181818","0","ENSMUSG00000045896"
"758","","",,,"Ccdc149","false","false","Cluster 3","Clustered","7.912087912087912","0","ENSMUSG00000045790"
"1779","","",,,"Kank1","false","false","Cluster 3","Clustered","8.192307692307692","0","ENSMUSG00000032702"
"753","","",,,"Insig1","false","false","Cluster 3","Clustered","7.0","0","ENSMUSG00000045294"
"752","","",,,"Asxl3","false","false","Cluster 3","Clustered","6.871794871794871","0","ENSMUSG00000045215"
"1771","","",,,"Rbp2","false","false","Cluster 3","Clustered","7.822222222222222","0","ENSMUSG00000032454"
"746","","",,,"Dact1","false","false","Cluster 3","Clustered","8.318181818181818","0","ENSMUSG00000044548"
"1764","","",,,"Tmed3","false","false","Cluster 3","Clustered","7.644444444444445","0","ENSMUSG00000032353"
"1760","","",,,"Dnaja4","false","false","Cluster 3","Clustered","7.03030303030303","0","ENSMUSG00000032285"
"735","","",,,"Ppp2r3a","false","false","Cluster 3","Clustered","7.2727272727272725","0","ENSMUSG00000043154"
"1758","","",,,"Irak1bp1","false","false","Cluster 3","Clustered","8.0","0","ENSMUSG00000032251"
"733","","",,,"Maneal","false","false","Cluster 3","Clustered","6.871794871794871","0","ENSMUSG00000042763"
"732","","",,,"Ttc9","false","false","Cluster 3","Clustered","7.644444444444445","0","ENSMUSG00000042734"
"1753","","",,,"Mpzl2","false","false","Cluster 3","Clustered","8.192307692307692","0","ENSMUSG00000032092"
"729","","",,,"Fam227a","false","false","Cluster 3","Clustered","8.318181818181818","0","ENSMUSG00000042564"
"728","","",,,"Adora1","false","false","Cluster 3","Clustered","8.0","0","ENSMUSG00000042429"
"727","","",,,"Osbpl6","false","false","Cluster 3","Clustered","8.0","0","ENSMUSG00000042359"
"1751","","",,,"Apoa1","false","false","Cluster 3","Clustered","7.961538461538462","0","ENSMUSG00000032083"
"725","","",,,"S100a14","false","false","Cluster 3","Clustered","7.846153846153847","0","ENSMUSG00000042306"
"719","","",,,"Kank3","false","false","Cluster 3","Clustered","7.813186813186814","0","ENSMUSG00000042099"
"1740","ARCHS4 Coexpression,381;Enrichr Queries,1146;GTEx Coexpression,1490","RB1,GIMAP1,CBLB,RORA,JADE2,NR3C1,CELSR1,GIMAP6,ETS1,SMC4,SESN1,CHEK2,RASSF5,PRKCH,PRKCA,GPRIN3,ERN1,CLIP3,MFNG,SQSTM1,CARD11,PFN2,MACF1,BEX3,AKNA,MAGED1,INSIG1,ITPR1,GMPR,NEU3,NLRP6,HMOX1,RREB1,COX10,PRNP,JUN,MGAM,TIPARP,FAM78A,NFATC2,HMGA2,MSN,PTPRC,BHLHE40,DENND1C,TRIM72,BTG2,CELF2,ATP2A3,ITGAL,RCSD1,JPH1,SYNE3,SYNE2,LIMD2,ADGRE5,SCRN1,TIMP2,CD38,EMB,CD53,SUN2,MYBPC2,CNOT6L,TMC8,PARP8,ARL4C,CCNA2,APBB1IP,NCOR1,TUBB2A,TFDP2,LCK,IRF1,PXDN,CAT,EVL,SYNC,SMTNL2,ARHGEF6,CEBPA,CCDC69,LEF1,CXCR4,NLRC3,ADD3,AURKB,FAM117A,FGD3,ABLIM1,PDPR,SH3BP1,HSF2,E2F2,FYN,PLEKHA2,PIK3IP1,STK17B,TRIM38","1154","1006.0","Nfatc3","false","false","Cluster 3","Clustered","7.644444444444445","0","ENSMUSG00000031902"
"714","","",,,"Shisa4","false","false","Cluster 3","Clustered","8.0","0","ENSMUSG00000041889"
"711","","",,,"Ccdc64","false","false","Cluster 3","Clustered","7.628571428571428","0","ENSMUSG00000041609"
"710","","",,,"Camsap2","false","false","Cluster 3","Clustered","7.542857142857143","0","ENSMUSG00000041570"
"1732","","",,,"Mast3","false","false","Cluster 3","Clustered","7.151515151515151","0","ENSMUSG00000031833"
"1731","","",,,"Adgrg1","false","false","Cluster 3","Clustered","7.5636363636363635","0","ENSMUSG00000031785"
"705","","",,,"Pla2g5","false","false","Cluster 3","Clustered","8.318181818181818","0","ENSMUSG00000041193"
"703","","",,,"H2afv","false","false","Cluster 3","Clustered","8.380952380952381","0","ENSMUSG00000041126"
"702","","",,,"Nbl1","false","false","Cluster 3","Clustered","7.2727272727272725","0","ENSMUSG00000041120"
"701","","",,,"Tspyl2","false","false","Cluster 3","Clustered","7.813186813186814","0","ENSMUSG00000041096"
"1722","","",,,"Slit2","false","false","Cluster 3","Clustered","7.5636363636363635","0","ENSMUSG00000031558"
"695","","",,,"Igsf21","false","false","Cluster 3","Clustered","7.2727272727272725","0","ENSMUSG00000040972"
"1716","","",,,"Adprhl1","false","false","Cluster 3","Clustered","7.466666666666667","0","ENSMUSG00000031448"
"692","","",,,"Clcf1","false","false","Cluster 3","Clustered","6.9743589743589745","0","ENSMUSG00000040663"
"690","","",,,"Chrm4","false","false","Cluster 3","Clustered","7.275","0","ENSMUSG00000040495"
"1714","","",,,"F10","false","false","Cluster 3","Clustered","8.0","0","ENSMUSG00000031444"
"1713","","",,,"Abcd1","false","false","Cluster 3","Clustered","7.822222222222222","0","ENSMUSG00000031378"
"2734","","",,,"4930552P12Rik","false","false","Cluster 3","Clustered","8.192307692307692","0","ENSMUSG00000097632"
"1709","","",,,"Zfp185","false","false","Cluster 3","Clustered","7.0","0","ENSMUSG00000031351"
"1708","","",,,"Chic1","false","false","Cluster 3","Clustered","8.318181818181818","0","ENSMUSG00000031327"
"2731","","",,,"Gm4319","false","false","Cluster 3","Clustered","6.871794871794871","0","ENSMUSG00000102123"
"682","","",,,"Pacsin1","false","false","Cluster 3","Clustered","8.318181818181818","0","ENSMUSG00000040276"
"681","","",,,"Zfp704","false","false","Cluster 3","Clustered","8.308823529411764","0","ENSMUSG00000040209"
"680","","",,,"Fmo2","false","false","Cluster 3","Clustered","7.0","0","ENSMUSG00000040170"
"2726","","",,,"RP24-236E2.3","false","false","Cluster 3","Clustered","7.418181818181818","0","ENSMUSG00000111202"
"677","","",,,"Xkr5","false","false","Cluster 3","Clustered","7.542857142857143","0","ENSMUSG00000039814"
"675","","",,,"Gabbr2","false","false","Cluster 3","Clustered","8.318181818181818","0","ENSMUSG00000039809"
"2722","","",,,"RP23-312B17.2","false","false","Cluster 3","Clustered","8.045454545454545","0","ENSMUSG00000110697"
"674","","",,,"Alg2","false","false","Cluster 3","Clustered","7.03030303030303","0","ENSMUSG00000039740"
"2719","","",,,"Gm32540","false","false","Cluster 3","Clustered","6.9743589743589745","0","ENSMUSG00000108961"
"671","","",,,"Neil3","false","false","Cluster 3","Clustered","7.644444444444445","0","ENSMUSG00000039396"
"670","","",,,"Tnfsf10","false","false","Cluster 3","Clustered","7.151515151515151","0","ENSMUSG00000039304"
"669","","",,,"Megf9","false","false","Cluster 3","Clustered","6.9485294117647065","0","ENSMUSG00000039270"
"668","","",,,"Dap","false","false","Cluster 3","Clustered","8.25","0","ENSMUSG00000039168"
"2714","","",,,"Gm44386","false","false","Cluster 3","Clustered","8.0","0","ENSMUSG00000107689"
"2713","","",,,"Gm26901","false","false","Cluster 3","Clustered","8.181818181818182","0","ENSMUSG00000097797"
"664","","",,,"Hrh3","false","false","Cluster 3","Clustered","7.628571428571428","0","ENSMUSG00000039059"
"2711","","",,,"9130221F21Rik","false","false","Cluster 3","Clustered","8.192307692307692","0","ENSMUSG00000108356"
"661","","",,,"Bmp6","false","false","Cluster 3","Clustered","8.0","0","ENSMUSG00000039004"
"660","","",,,"Tspyl5","false","false","Cluster 3","Clustered","8.192307692307692","0","ENSMUSG00000038984"
"656","","",,,"Pold1","false","false","Cluster 3","Clustered","8.318181818181818","0","ENSMUSG00000038644"
"652","","",,,"Dennd2a","false","false","Cluster 3","Clustered","8.235294117647058","0","ENSMUSG00000038456"
"2700","","",,,"Gm12589","false","false","Cluster 3","Clustered","7.822222222222222","0","ENSMUSG00000085126"
"647","","",,,"Kcnh2","false","false","Cluster 3","Clustered","8.088235294117647","0","ENSMUSG00000038319"
"1669","","",,,"Ccdc184","false","false","Cluster 3","Clustered","7.0","0","ENSMUSG00000029875"
"1666","","",,,"Aoc1","false","false","Cluster 3","Clustered","7.418181818181818","0","ENSMUSG00000029811"
"640","","",,,"Zfp365","false","false","Cluster 3","Clustered","8.181818181818182","0","ENSMUSG00000037855"
"1663","","",,,"Akr1b8","false","false","Cluster 3","Clustered","8.045454545454545","0","ENSMUSG00000029762"
"2686","","",,,"Gm26685","false","false","Cluster 3","Clustered","7.822222222222222","0","ENSMUSG00000097281"
"636","","",,,"Fermt2","false","false","Cluster 3","Clustered","8.192307692307692","0","ENSMUSG00000037712"
"2684","","",,,"Gm13412","false","false","Cluster 3","Clustered","8.318181818181818","0","ENSMUSG00000085017"
"635","","",,,"Aspg","false","false","Cluster 3","Clustered","7.912087912087912","0","ENSMUSG00000037686"
"632","","",,,"Cdkn3","false","false","Cluster 3","Clustered","8.192307692307692","0","ENSMUSG00000037628"
"1650","","",,,"Mmp17","false","false","Cluster 3","Clustered","8.076923076923077","0","ENSMUSG00000029436"
"624","","",,,"Vnn1","false","false","Cluster 3","Clustered","6.871794871794871","0","ENSMUSG00000037440"
"1645","","",,,"Cxcl1","false","false","Cluster 3","Clustered","7.6608187134502925","0","ENSMUSG00000029380"
"615","","",,,"Xpnpep2","false","false","Cluster 3","Clustered","7.0","0","ENSMUSG00000037005"
"1637","","",,,"Epha5","false","false","Cluster 3","Clustered","7.644444444444445","0","ENSMUSG00000029245"
"608","","",,,"Lpar3","false","false","Cluster 3","Clustered","7.5636363636363635","0","ENSMUSG00000036832"
"607","","",,,"Ttll7","false","false","Cluster 3","Clustered","8.076923076923077","0","ENSMUSG00000036745"
"606","","",,,"Tcaf1","false","false","Cluster 3","Clustered","7.5636363636363635","0","ENSMUSG00000036667"
"605","","",,,"Chst12","false","false","Cluster 3","Clustered","8.382352941176471","0","ENSMUSG00000036599"
"1629","","",,,"Crmp1","false","false","Cluster 3","Clustered","7.5636363636363635","0","ENSMUSG00000029121"
"1626","","",,,"Klhl7","false","false","Cluster 3","Clustered","7.151515151515151","0","ENSMUSG00000028986"
"600","","",,,"Krt222","false","false","Cluster 3","Clustered","8.0","0","ENSMUSG00000035849"
"596","","",,,"Slc12a8","false","false","Cluster 3","Clustered","7.418181818181818","0","ENSMUSG00000035506"
"595","","",,,"Reep6","false","false","Cluster 3","Clustered","8.192307692307692","0","ENSMUSG00000035504"
"593","","",,,"Sstr1","false","false","Cluster 3","Clustered","8.318181818181818","0","ENSMUSG00000035431"
"590","","",,,"Trim13","false","false","Cluster 3","Clustered","8.076923076923077","0","ENSMUSG00000035235"
"589","","",,,"Heatr5a","false","false","Cluster 3","Clustered","8.38095238095238","0","ENSMUSG00000035181"
"1612","","",,,"Prkaa2","false","false","Cluster 3","Clustered","7.961538461538462","0","ENSMUSG00000028518"
"585","","",,,"Fam167a","false","false","Cluster 3","Clustered","8.181818181818182","0","ENSMUSG00000035095"
"1605","","",,,"Decr1","false","false","Cluster 3","Clustered","7.644444444444445","0","ENSMUSG00000028223"
"579","","",,,"Ptpn13","false","false","Cluster 3","Clustered","7.813186813186814","0","ENSMUSG00000034573"
"575","","",,,"Nipsnap1","false","false","Cluster 3","Clustered","7.912087912087912","0","ENSMUSG00000034285"
"573","ARCHS4 Coexpression,473;Enrichr Queries,29;GTEx Coexpression,1029","FOXA1,STEAP3,SPARC,CSF1,CELSR1,MKI67,ESPN,CLU,AQP3,ICAM1,LGALS3,GJA1,EFEMP1,CHEK2,FAM174A,MYB,CCDC96,DZIP1L,CYP1B1,TEKT4,SOX9,SLC16A3,TGM2,IER3,KCNH2,SEMA6A,DNAAF3,IGFBP5,DNAAF1,FST,IGFBP2,PIPOX,SHISA2,FAM227A,ERN2,GPR162,CLDN4,MYCN,RAB36,LGALS12,SELENOP,S100A6,ODF3B,CTXN1,SLC27A2,SLC22A4,CDS1,CAPSL,EPAS1,ALOX15,CACNA1A,FBLN2,CFAP126,ADGRG1,MAATS1,ALDH3B1,NPTX2,ZBTB7C,NGFR,MYH7B,JUN,TGFB2,DTNA,MCAM,FN1,FZD9,HSPA2,TMEM231,GADD45G,FOSL1,CXCL10,ALS2CR12,COL1A2,FXYD3,BHLHE40,COL9A3,DNAL1,ITM2C,LRP11,CDKN1C,TTC26,COL18A1,BTG2,LRRC10B,HSPB8,SLC2A1,HSPB1,ADM,SLC7A11,WFDC2,C1QTNF1,EFCAB1,TIMP3,CNGA4,KIF1A,CFAP45,PACRG,ANXA1,TNFRSF12A,IQCD,NME5,WNT9A,REXO2,ETV4,ACTA2,ALDH1A3,GPRC5B,PTP4A3,VGF,CCDC74A,NME9,PXDN,TFF3,BIRC5,CFAP54,GAS6,CRYAB,CCDC189,TAGLN,DNAH2,DNAH5,RGS16,LEF1,CXCR4,RSPH9,CRIP2,THBS1,AURKB,NWD1,DZANK1,SPOCK2,UCP2,AGR2,MSX1,CKB,FLNC,CRYM,IL33,MARCKSL1,GSN,CYP4B1,SYT13,MAPK15,DHRS3,SULF2,BAIAP3,RSPH1,TPPP3,KRT18,DHRS9,DNAJA4,GSTA1,FOSB,INSM1,CRLF1","532","510.3","Foxj1","false","false","Cluster 3","Clustered","7.418181818181818","0","ENSMUSG00000034227"
"571","","",,,"Pqlc1","false","false","Cluster 3","Clustered","8.382352941176471","0","ENSMUSG00000034006"
"570","","",,,"Aspm","false","false","Cluster 3","Clustered","7.2727272727272725","0","ENSMUSG00000033952"
"569","","",,,"Map9","false","false","Cluster 3","Clustered","8.088235294117647","0","ENSMUSG00000033900"
"1591","","",,,"Enpep","false","false","Cluster 3","Clustered","7.973856209150327","0","ENSMUSG00000028024"
"566","","",,,"Adra2a","false","false","Cluster 3","Clustered","7.7142857142857135","0","ENSMUSG00000033717"
"565","","",,,"Stard9","false","false","Cluster 3","Clustered","7.912087912087912","0","ENSMUSG00000033705"
"551","","",,,"Ift57","false","false","Cluster 3","Clustered","8.333333333333334","0","ENSMUSG00000032965"
"550","","",,,"Acsl3","false","false","Cluster 3","Clustered","7.846153846153847","0","ENSMUSG00000032883"
"1573","","",,,"Procr","false","false","Cluster 3","Clustered","8.307692307692308","0","ENSMUSG00000027611"
"1569","","",,,"Cst3","false","false","Cluster 3","Clustered","8.192307692307692","0","ENSMUSG00000027447"
"1568","","",,,"Napb","false","false","Cluster 3","Clustered","7.151515151515151","0","ENSMUSG00000027438"
"542","","",,,"1700025G04Rik","false","false","Cluster 3","Clustered","8.382352941176471","0","ENSMUSG00000032666"
"539","","",,,"Amotl2","false","false","Cluster 3","Clustered","8.104575163398692","0","ENSMUSG00000032531"
"1561","","",,,"Gpcpd1","false","false","Cluster 3","Clustered","7.466666666666667","0","ENSMUSG00000027346"
"534","","",,,"Car12","false","false","Cluster 3","Clustered","8.010989010989011","0","ENSMUSG00000032373"
"533","","",,,"Fam83b","false","false","Cluster 3","Clustered","7.466666666666667","0","ENSMUSG00000032358"
"532","","",,,"Rasgrf1","false","false","Cluster 3","Clustered","6.823529411764706","0","ENSMUSG00000032356"
"531","","",,,"Hcn4","false","false","Cluster 3","Clustered","8.192307692307692","0","ENSMUSG00000032338"
"1555","","",,,"Slc28a2","false","false","Cluster 3","Clustered","7.822222222222222","0","ENSMUSG00000027219"
"1553","","",,,"Tcp11l1","false","false","Cluster 3","Clustered","7.644444444444445","0","ENSMUSG00000027175"
"1551","","",,,"Slc43a1","false","false","Cluster 3","Clustered","7.457142857142857","0","ENSMUSG00000027075"
"526","","",,,"Rab27a","false","false","Cluster 3","Clustered","8.076923076923077","0","ENSMUSG00000032202"
"1550","","",,,"Slc43a3","false","false","Cluster 3","Clustered","7.466666666666667","0","ENSMUSG00000027074"
"517","","",,,"Mmp15","false","false","Cluster 3","Clustered","8.235294117647058","0","ENSMUSG00000031790"
"1540","","",,,"Pkn3","false","false","Cluster 3","Clustered","8.104575163398692","0","ENSMUSG00000026785"
"1536","","",,,"Mgst3","false","false","Cluster 3","Clustered","8.308823529411764","0","ENSMUSG00000026688"
"511","","",,,"Sorbs2","false","false","Cluster 3","Clustered","8.0","0","ENSMUSG00000031626"
"509","","",,,"Rbpms","false","false","Cluster 3","Clustered","8.382352941176471","0","ENSMUSG00000031586"
"1532","ARCHS4 Coexpression,114;Enrichr Queries,337;GTEx Coexpression,477","OLFML2B,SPARC,CSF1,MAML2,PLOD2,PLAT,NR3C1,ETS1,ELK3,MYLK,RGS4,EFEMP2,GJA1,EFEMP1,EVA1B,PLAU,RPS6KA2,DPYSL3,PLS3,CYP1B1,SOX9,SBF2,TGM2,POSTN,SCARA3,IGFBP5,WNT5B,IL1R1,FST,WNT5A,AFAP1,P3H3,HSPG2,PDGFRL,DKK3,COL4A2,COL4A1,S100A6,SERPING1,COL8A1,KDELR3,MXRA7,PLPP3,MYL9,NBL1,CEMIP,EPAS1,LPL,FBLN1,FBLN2,NID2,CYB5R3,CALHM2,CALD1,PDGFC,TSPAN4,SNX9,IGFBP7,RAB11FIP5,FZD1,CRTAP,JUN,TGFB2,ATP8B2,CAV2,TGFB3,GFPT2,CRIM1,FN1,RASSF9,SSC5D,EHD2,CXCL10,COL1A2,BHLHE40,AMOTL2,FAT4,AMOTL1,FERMT2,COL18A1,ITGB5,TGFB1I1,FHL1,PTPRM,ADM,PEAR1,TTC28,C1QTNF1,SH3PXD2A,CTSK,DSE,TIMP2,ANXA6,BDKRB2,TIMP3,SCARF2,ZCCHC24,ANXA1,MME,CHPF2,MYOF,ANXA5,BGN,COPZ2,CKAP4,PARD3B,ACTA2,TGFBR3,ALDH1A3,RCN1,PTP4A3,PXDN,PLSCR4,COL6A1,RBMS1,ITGA5,GAS6,CRYAB,PDZRN3,VGLL3,RBMS3,MATN2,TAGLN,LRP1,SEMA3C,LAMA4,FAM129A,SNX33,PTGS2,THBS1,AURKB,FAM129B,RAB23,GPC1,SLIT1,SLIT2,FLNC,SLC12A4,GALNT5,GSN,VEGFC,MEIS2,SORBS3,PTPN14,SULF2,COL3A1,PCDHB16,MSRB3,KCNK2,RBM43","231","309.3","Prrx1","false","false","Cluster 3","Clustered","7.813186813186814","0","ENSMUSG00000026586"
"508","","",,,"Dctd","false","false","Cluster 3","Clustered","6.909090909090909","0","ENSMUSG00000031562"
"1528","","",,,"Lamc2","false","false","Cluster 3","Clustered","7.418181818181818","0","ENSMUSG00000026479"
"501","","",,,"Rbbp7","false","false","Cluster 3","Clustered","8.318181818181818","0","ENSMUSG00000031353"
"1524","","",,,"Pigr","false","false","Cluster 3","Clustered","7.418181818181818","0","ENSMUSG00000026417"
"1519","ARCHS4 Coexpression,283;Enrichr Queries,17;GTEx Coexpression,531","FCGBP,AHCYL2,SPARC,DEFB1,CWH43,CELSR1,MKI67,ETS1,SLC4A4,CLU,AQP3,CLDN1,MYLK,TGM1,LGALS3,GJA1,CAPN8,EFEMP1,DEPTOR,IYD,CHEK2,LIPG,DPYSL3,CAPN2,CYP1B1,SOX9,SLC12A8,FADS1,TGM2,IER3,EPHA4,SLC34A2,IGFBP5,DIO1,SLC11A2,IGFBP2,NPNT,KNSTRN,OVOL2,SLC9A3,ERN2,CLDN4,KATNAL1,COL4A2,SOAT2,COL4A1,LGALS12,RRAGD,SELENOP,MALL,NUPR1,PLPP3,PTGES,CDS1,PARM1,EPAS1,MAOA,ILDR1,LPL,SLC1A3,IL20RB,AK4,TNFRSF11A,FUT2,NDRG2,NDRG1,HSD11B2,ADGRG1,CRACR2A,PODXL,HMOX1,S100A14,KCNN4,RREB1,PPARGC1A,ZBTB7C,JAG2,MYH7B,PRNP,JUN,TGFB2,ARHGEF37,NEBL,MCAM,EPHX2,FN1,FZD9,SLC4A11,INHBB,CORO2A,FBXO32,FER1L6,SYT8,ACSF2,GADD45G,NET1,CXCL10,DLG3,FXYD3,MYO5B,MYO5C,BHLHE40,RGL3,SLC26A3,ITM2C,KCNK5,PIGR,BTG2,ARHGAP8,SLC2A1,KRT23,HSPB1,LAMC2,ADM,PRSS22,WFDC2,TMED3,TIMP3,ANXA8,UPP1,TINAG,EDN1,FGFBP1,MMP7,MME,ANXA3,MYOF,REXO2,ETV5,SERPINB5,ARL4C,TGFBR3,TMEM37,ANO1,ALDH1A3,PTP4A3,SLC7A8,PXDN,KIT,ALDH1A1,KCNMA1,TFF3,DSG3,CDH16,MGLL,LAMA5,SLC47A1,SEMA3C,LAMA4,FAM129A,CXCR4,ATP1A1,SNX33,SEMA3F,PTGS2,THBS1,PAPSS2,AURKB,MROH1,SELENBP1,SCEL,CAMK2N1,ERBB2,SLITRK6,KLRG2,MAL2,D2HGDH,LRIG3,CKB,MPZL2,LRRC26,EGLN3,GSN,AHNAK2,KCNJ16,CYP4B1,SORBS2,GRHL3,FMO4,SORL1,SGPP2,SULF2,MYO1D,CAPN13,KRT18,DHRS9,PCDHB16,FOSB,NECTIN4,CCL28","199","277.0","Tfcp2l1","false","false","Cluster 3","Clustered","7.2727272727272725","0","ENSMUSG00000026380"
"1516","","",,,"Tnfrsf11a","false","false","Cluster 3","Clustered","7.457142857142857","0","ENSMUSG00000026321"
"1515","","",,,"Asb1","false","false","Cluster 3","Clustered","7.7142857142857135","0","ENSMUSG00000026311"
"489","","",,,"Nucb2","false","false","Cluster 3","Clustered","7.813186813186814","0","ENSMUSG00000030659"
"486","","",,,"Cers3","false","false","Cluster 3","Seed","8.50909090909091","0","ENSMUSG00000030510"
"483","","",,,"Tuba8","false","false","Cluster 3","Clustered","8.192307692307692","0","ENSMUSG00000030137"
"482","","",,,"Ret","false","false","Cluster 3","Clustered","7.822222222222222","0","ENSMUSG00000030110"
"481","","",,,"Usp18","false","false","Cluster 3","Clustered","8.308823529411764","0","ENSMUSG00000030107"
"480","ARCHS4 Coexpression,927;Enrichr Queries,50;GTEx Coexpression,633","ALDH1L1,ANKRD13D,IRS1,GOLT1A,GALNT18,RORA,ABAT,ACSM5,CELSR1,MKI67,SLC4A4,CLU,LGALS3,GJA1,EFEMP1,IL18RAP,SESN1,CHEK2,SCMH1,DAG1,LONP1,CYP1B1,SOX9,CHAC1,HADH,FADS1,MFSD2A,TGM2,IER3,HES7,GABARAPL1,DGAT2,IGFBP5,FST,IGFBP2,SERPINF2,RNASE4,HOGA1,CYP27A1,CYP2U1,PPP1R3C,SOAT2,FAM185A,GPD1,LGALS12,SELENOP,ACOT2,ACOT1,SERPING1,KCNQ4,NUPR1,CYP2E1,PLPP3,HPD,CDS1,PFKFB1,PFKFB3,MAOA,EPAS1,ARHGEF25,INSIG1,MGST1,GPR85,LPL,SLC1A3,NDRG2,ACACB,NDRG1,ACAT1,STC2,HMOX1,PPARGC1A,SCN3A,RAI2,SLC19A2,KLHDC2,PRNP,JUN,FZD4,MCAM,EPHX2,ZBTB10,FN1,FZD9,RMDN2,NR1D1,CORO2A,FBXO32,TRERF1,INHBC,GADD45G,MLXIPL,CXCL10,GJB1,BHLHE40,ID4,FERMT2,ITM2C,SCN2B,BTG2,HSPB8,FHL1,SLC2A1,HSPB1,SLC2A2,ADM,GPT,HIF3A,TMEM220,HERPUD1,SHF,NADK2,SGCB,TIMP3,SUN2,RMI2,TMEM150A,MME,COPZ2,ANO6,PRODH2,PARD3B,TGFBR3,GPRC5B,PTP4A3,SLC7A8,PXDN,ALDH1A1,ASPG,ITGA7,PPARA,CRYAB,MGLL,RBMS3,MATN2,CEBPA,SLC43A1,AFM,CXCR4,HSD17B6,THBS1,NKD1,AURKB,SELENBP1,RASD1,SH3BP1,TCEAL1,ATOH8,CKB,ACSS1,IL33,EGLN3,GSN,BNIP3,CYP4B1,MERTK,FMO4,DHRS3,MAPK13,ALDH4A1,SPSB1,CFHR2,TCEA3,PCDHB16,FOSB,COQ8A,PFKP","567","536.7","Klf15","false","false","Cluster 3","Clustered","7.777777777777778","0","ENSMUSG00000030087"
"477","","",,,"Mad2l1","false","false","Cluster 3","Clustered","7.912087912087912","0","ENSMUSG00000029910"
"1495","","",,,"Ly96","false","false","Cluster 3","Clustered","7.644444444444445","0","ENSMUSG00000025779"
"1492","","",,,"Slc28a1","false","false","Cluster 3","Clustered","7.961538461538462","0","ENSMUSG00000025726"
"1491","","",,,"Tmem89","false","false","Cluster 3","Clustered","7.418181818181818","0","ENSMUSG00000025652"
"1487","","",,,"Rbfox3","false","false","Cluster 3","Clustered","8.318181818181818","0","ENSMUSG00000025576"
"463","","",,,"Dpysl5","false","false","Cluster 3","Clustered","6.871794871794871","0","ENSMUSG00000029168"
"460","","",,,"Ociad2","false","false","Cluster 3","Clustered","8.235294117647058","0","ENSMUSG00000029153"
"1483","","",,,"Cyp2e1","false","false","Cluster 3","Clustered","8.076923076923077","0","ENSMUSG00000025479"
"457","","",,,"Fam213b","false","false","Cluster 3","Clustered","7.941176470588235","0","ENSMUSG00000029059"
"455","ARCHS4 Coexpression,840;Enrichr Queries,84;GTEx Coexpression,599","FOXA1,IL1RN,CWH43,CELSR1,ESPN,AQP3,CLU,TSKU,TGM1,LGALS3,PLAU,CHEK2,LIPG,TNFSF10,CYP1B1,SLC25A43,SOX9,MS4A10,FADS1,EPHB3,TGM2,IER3,SLC30A2,FST,SYTL1,SHISA2,SLC51A,HSPG2,FAM227A,TERB1,CLDN4,MALL,LGALS12,LY6D,NUPR1,EPHA1,PTGES,CEMIP,IGSF3,EPAS1,ABHD1,PLA2G3,IL20RB,CACNA1A,FBXO48,LPAR3,FUT2,NDRG1,FUT1,NPAS2,RAP1GAP,ADGRG1,KLC3,RDH12,STC2,GALR1,HMOX1,S100A14,KCNN4,RREB1,FAM83B,ZBTB7C,NGFR,PRNP,JUN,TGFB2,GSDMA,PLK2,FN1,IGF2,FZD9,TRPV3,RAB27B,PTK6,NR1D1,CORO2A,FBXO32,FOSL1,ARHGAP32,CXCL10,EFNA3,RAET1E,LPAR5,FXYD3,BHLHE40,CYP1A1,ZBTB8B,XKR5,CDKN1C,TRIM72,BTG2,CCDC120,CITED4,TCF23,SLC2A1,LAMC2,ADM,TFCP2L1,SLC7A11,C1QTNF1,ANXA6,PGM2,ANXA8,UPP1,CERS3,FGFBP1,TMEM40,WNT9A,REXO2,SERPINB5,ARL4C,ACTA2,ALDH1A3,PTP4A3,VGF,RILPL1,PXDN,KCNMA1,BIRC5,DSG3,HAP1,SPACA6,SHANK2,TUFT1,LAMA4,RGS16,CXCR4,ZDHHC24,SEMA3F,PTGS2,BARX2,THBS1,AURKB,FAM129B,SCEL,NEURL1B,RASSF10,CAMK2N1,MAL2,E2F2,MSX1,CKB,GPR157,MPZL2,KCNJ5,CDKN2B,IRX4,AHNAK2,GRHL3,OTOP3,DHRS3,MAPK13,SULF2,SPSB1,KRT18,TCEA3,FOSB,NECTIN4,CRLF1,CDKN3","522","507.7","Hes2","false","false","Cluster 3","Clustered","8.076923076923077","0","ENSMUSG00000028940"
"1479","","",,,"Atp5a1","false","false","Cluster 3","Clustered","8.318181818181818","0","ENSMUSG00000025428"
"453","","",,,"Hspg2","false","false","Cluster 3","Clustered","7.35","0","ENSMUSG00000028763"
"452","","",,,"Pla2g2f","false","false","Cluster 3","Clustered","8.318181818181818","0","ENSMUSG00000028749"
"450","","",,,"Pdzk1ip1","false","false","Cluster 3","Clustered","7.822222222222222","0","ENSMUSG00000028716"
"1472","","",,,"Sema4g","false","false","Cluster 3","Clustered","8.076923076923077","0","ENSMUSG00000025207"
"2487","","",,,"Slc26a4","false","false","Cluster 3","Clustered","7.0","0","ENSMUSG00000020651"
"1463","","",,,"Cbr2","false","false","Cluster 3","Clustered","8.181818181818182","0","ENSMUSG00000025150"
"437","","",,,"Aqp3","false","false","Cluster 3","Clustered","7.5636363636363635","0","ENSMUSG00000028435"
"435","","",,,"Smc2","false","false","Cluster 3","Clustered","7.961538461538462","0","ENSMUSG00000028312"
"1459","","",,,"Tdrd1","false","false","Cluster 3","Clustered","7.151515151515151","0","ENSMUSG00000025081"
"434","","",,,"Epha7","false","false","Cluster 3","Clustered","7.644444444444445","0","ENSMUSG00000028289"
"1451","","",,,"Plcb3","false","false","Cluster 3","Clustered","7.2727272727272725","0","ENSMUSG00000024960"
"1450","","",,,"Slc1a1","false","false","Cluster 3","Clustered","7.644444444444445","0","ENSMUSG00000024935"
"420","","",,,"Ccna2","false","false","Cluster 3","Clustered","7.418181818181818","0","ENSMUSG00000027715"
"419","","",,,"Nceh1","false","false","Cluster 3","Clustered","8.03921568627451","0","ENSMUSG00000027698"
"418","","",,,"Slc2a10","false","false","Cluster 3","Clustered","7.418181818181818","0","ENSMUSG00000027661"
"417","","",,,"Fam83d","false","false","Cluster 3","Clustered","7.466666666666667","0","ENSMUSG00000027654"
"2465","","",,,"Ly6a","false","false","Cluster 3","Clustered","7.418181818181818","0","ENSMUSG00000075602"
"1437","","",,,"Fads3","false","false","Cluster 3","Clustered","7.127272727272727","0","ENSMUSG00000024664"
"413","","",,,"Tpx2","false","false","Cluster 3","Clustered","7.35","0","ENSMUSG00000027469"
"412","","",,,"Bfsp1","false","false","Cluster 3","Clustered","7.35","0","ENSMUSG00000027420"
"1434","","",,,"Spire1","false","false","Cluster 3","Clustered","8.192307692307692","0","ENSMUSG00000024533"
"406","","",,,"Cat","false","false","Cluster 3","Clustered","8.076923076923077","0","ENSMUSG00000027187"
"403","","",,,"Il1rn","false","false","Cluster 3","Clustered","7.813186813186814","0","ENSMUSG00000026981"
"1427","","",,,"Ttc39c","false","false","Cluster 3","Clustered","7.644444444444445","0","ENSMUSG00000024424"
"1424","","",,,"Aqp4","false","false","Cluster 3","Clustered","7.127272727272727","0","ENSMUSG00000024411"
"397","","",,,"Tor1b","false","false","Cluster 3","Clustered","7.7142857142857135","0","ENSMUSG00000026848"
"2444","","",,,"Pfn2","false","false","Cluster 3","Clustered","7.466666666666667","0","ENSMUSG00000027805"
"1419","","",,,"Dtna","false","false","Cluster 3","Clustered","7.0","0","ENSMUSG00000024302"
"2442","","",,,"Cfp","false","false","Cluster 3","Clustered","7.644444444444445","0","ENSMUSG00000001128"
"1418","","",,,"Cyp4f14","false","false","Cluster 3","Clustered","7.151515151515151","0","ENSMUSG00000024292"
"1416","","",,,"Tekt4","false","false","Cluster 3","Clustered","8.076923076923077","0","ENSMUSG00000024175"
"388","","",,,"Sdccag8","false","false","Cluster 3","Clustered","7.5636363636363635","0","ENSMUSG00000026504"
"1411","","",,,"Lbh","false","false","Cluster 3","Clustered","8.076923076923077","0","ENSMUSG00000024063"
"387","","",,,"Fam129a","false","false","Cluster 3","Clustered","7.418181818181818","0","ENSMUSG00000026483"
"1410","","",,,"Cyp4f13","false","false","Cluster 3","Clustered","8.318181818181818","0","ENSMUSG00000024055"
"385","","",,,"Nfasc","false","false","Cluster 3","Clustered","7.2727272727272725","0","ENSMUSG00000026442"
"384","","",,,"Rassf5","false","false","Cluster 3","Clustered","8.235294117647058","0","ENSMUSG00000026430"
"1408","","",,,"Tff3","false","false","Cluster 3","Clustered","7.542857142857143","0","ENSMUSG00000024029"
"381","","",,,"Ecel1","false","false","Cluster 3","Clustered","7.418181818181818","0","ENSMUSG00000026247"
"1401","","",,,"Slc22a1","false","false","Cluster 3","Clustered","7.5636363636363635","0","ENSMUSG00000023829"
"376","","",,,"Cps1","false","false","Cluster 3","Clustered","7.2727272727272725","0","ENSMUSG00000025991"
"1396","","",,,"Kcnk5","false","false","Cluster 3","Clustered","7.813186813186814","0","ENSMUSG00000023243"
"371","","",,,"Unc5a","false","false","Cluster 3","Clustered","6.9743589743589745","0","ENSMUSG00000025876"
"2416","","",,,"Flt3l","false","false","Cluster 3","Clustered","7.2727272727272725","0","ENSMUSG00000110206"
"366","","",,,"Slc15a1","false","false","Cluster 3","Clustered","7.418181818181818","0","ENSMUSG00000025557"
"1390","","",,,"Soat2","false","false","Cluster 3","Clustered","7.0","0","ENSMUSG00000023045"
"1385","","",,,"Btg3","false","false","Cluster 3","Clustered","8.318181818181818","0","ENSMUSG00000022863"
"361","","",,,"Dctn2","false","false","Cluster 3","Clustered","7.457142857142857","0","ENSMUSG00000025410"
"359","","",,,"Cd63","false","false","Cluster 3","Clustered","7.275","0","ENSMUSG00000025351"
"358","","",,,"Mfsd13a","false","false","Cluster 3","Clustered","7.014705882352941","0","ENSMUSG00000025227"
"355","","",,,"Gfra1","false","false","Cluster 3","Clustered","7.961538461538462","0","ENSMUSG00000025089"
"2399","","",,,"Kcnb2","false","false","Cluster 3","Clustered","7.0","0","ENSMUSG00000092083"
"1375","","",,,"Mapk8ip2","false","false","Cluster 3","Clustered","8.192307692307692","0","ENSMUSG00000022619"
"349","","",,,"Gpam","false","false","Cluster 3","Clustered","8.17142857142857","0","ENSMUSG00000024978"
"347","","",,,"Papss2","false","false","Cluster 3","Clustered","8.076923076923077","0","ENSMUSG00000024899"
"346","","",,,"Apba1","false","false","Cluster 3","Clustered","8.333333333333334","0","ENSMUSG00000024897"
"344","","",,,"Il33","false","false","Cluster 3","Clustered","8.318181818181818","0","ENSMUSG00000024810"
"341","","",,,"Pga5","false","false","Cluster 3","Clustered","7.961538461538462","0","ENSMUSG00000024738"
"1365","","",,,"Pde1b","false","false","Cluster 3","Clustered","7.2727272727272725","0","ENSMUSG00000022489"
"340","","",,,"Trpm6","false","false","Cluster 3","Clustered","8.235294117647058","0","ENSMUSG00000024727"
"1364","","",,,"Aco2","false","false","Cluster 3","Clustered","8.076923076923077","0","ENSMUSG00000022477"
"1363","","",,,"37865","false","false","Cluster 3","Clustered","7.151515151515151","0","ENSMUSG00000022456"
"339","","",,,"Pcsk5","false","false","Cluster 3","Clustered","8.318181818181818","0","ENSMUSG00000024713"
"338","","",,,"Anxa1","false","false","Cluster 3","Clustered","8.308823529411764","0","ENSMUSG00000024659"
"1361","","",,,"Sh3bp1","false","false","Cluster 3","Clustered","8.307692307692308","0","ENSMUSG00000022436"
"1360","","",,,"Upk3a","false","false","Cluster 3","Clustered","7.615384615384615","0","ENSMUSG00000022435"
"1359","","",,,"Khdrbs3","false","false","Cluster 3","Clustered","7.961538461538462","0","ENSMUSG00000022332"
"333","ARCHS4 Coexpression,220;Enrichr Queries,102;GTEx Coexpression,280","MDC1,CNTFR,MAML2,DIXDC1,CBLB,SLC4A4,MYLK,DPYSL5,DPYSL3,CYP1B1,KIF21A,SOX9,EPHA5,EPHA4,EPHA7,LIMCH1,DAPK1,CACNA2D1,AFAP1,PRKCA,HSPG2,TIAM2,ZC2HC1A,MAP1B,LGALS12,KCNQ4,KCTD12,PLPP3,MYL9,PFN2,EPAS1,MAGED1,TSHZ2,PIK3R3,SLCO5A1,MAP2,MAP6,SNX9,TSPAN2,HIVEP3,ST3GAL1,SCN3A,S100A11,JUN,FZD3,MCAM,FZD7,FN1,FZD9,DCLK2,ST18,CCDC88A,H2AFY2,PKIA,ID4,MRVI1,FAT4,FERMT2,PCDHB7,ITM2C,COL18A1,BTG2,TENM4,TGFB1I1,GPR20,PTPRM,SLC35F1,ROBO1,CASP12,TUBA1A,SH3PXD2A,TIMP3,RNF150,MME,MYOF,ANO6,ENAH,TUBB2A,KCNMA1,PXDN,KIT,PLCB1,PDZRN3,TAGLN,PRUNE2,AMIGO2,FAM129A,CXCR4,HOXD13,SNX33,PTGS2,TCEAL1,FLNA,CKB,PAK3,RUNX1T1,GSN,SORBS2,SULF2,SLCO3A1,ABI2,KIF26B,PCDHB16,MSRB3,CDK5R1,IRS1,RORA,FRY,NR3C1,CELSR1,ETS1,SLC8A1,DACH1,CDH2,KIF5C,SCMH1,PLXNC1,SEMA6A,IGFBP5,TMEM178B,SEMA6D,MAGI2,FRMD4A,SELENOM,COL4A2,COL4A1,TNIK,PHLDB2,TRABD2B,RASL12,ARHGEF25,RNF180,ITPR1,ITPR2,CACNA1C,NREP,NDRG1,PHF21B,CALD1,RAI2,PLXNA4,PRNP,CRTAP,TGFB2,TCAF1,OSBPL5,RBPMS,ATP8B2,ARHGEF39,ZBTB10,CRIM1,ARHGAP24,REEP1,SDK1,CXCL10,DAB1,NBEA,BHLHE40,CPE,MAFK,GPSM1,CELF2,FHL1,BICD1,SYNE2,TTC28,SYNE1,BOC,GDAP1L1,CEP170,KLF12,PARD3B,ACTA2,ARL4C,TGFBR3,PTP4A3,PDE5A,RBMS3,LAMA5,SEMA3C,CRMP1,THBS1,CXXC4,AURKB,NCALD,ABLIM1,GNG2,ALDH1B1,RAB23,SLIT1,FYN,SLIT2,WASF1,SLC12A4,SORL1,MEIS2,EFR3B,SLC4A7,SYT11,ASXL3,NOVA2,TRIM36","103","200.7","Setbp1","false","false","Cluster 3","Clustered","8.308823529411764","0","ENSMUSG00000024548"
"331","","",,,"Mal2","false","false","Cluster 3","Clustered","7.418181818181818","0","ENSMUSG00000024479"
"2379","","",,,"D130040H23Rik","false","false","Cluster 3","Clustered","8.0","0","ENSMUSG00000079038"
"329","","",,,"Spata24","false","false","Cluster 3","Clustered","7.2727272727272725","0","ENSMUSG00000024352"
"2374","","",,,"Cisd3","false","false","Cluster 3","Clustered","8.0","0","ENSMUSG00000078695"
"324","ARCHS4 Coexpression,76;Enrichr Queries,203;ReMap ChIP-seq,95;GTEx Coexpression,89","CPNE8,VIPR1,MT-ND5,SPARC,AVIL,TMEM94,ENO1,TSKU,ICAM1,MYLK,LGALS3,LIPE,GJA1,DPYSL5,CREB3L4,RPS6KA2,GJA4,NAMPT,TNFSF10,MS4A15,DAG1,CYP1B1,NCKAP5,PDK1,IER3,SLC34A2,STARD4,PRKCH,IL1R1,LIMCH1,AFAP1,ENTPD8,KNL1,KNSTRN,HSPG2,SYTL3,HOXB9,PPP1R3C,BIN1,MALL,SERPING1,COL8A1,KCTD12,MXRA7,PLPP3,MYL9,NBL1,PTGES,SLC22A4,MACF1,ABCB6,RETSAT,MAOA,STXBP1,LDHA,CYB5R3,STC2,TSPAN4,HMOX1,TSPAN2,RAB11FIP5,CDK18,JUN,PTPRN2,FZD4,PLK2,MCAM,FN1,ST18,CIDEC,EHD2,COL1A2,FXYD2,FERMT2,ITM2C,COL18A1,CLIC5,BTG2,GBE1,ZFAND2A,PTPRM,ADM,SLC7A11,PEAR1,VSIR,SLC6A4,KHK,SULT1C2,TMEM189,CASP12,MMP24,C1QTNF1,SH3PXD2A,TMEM44,TCP11L1,TIMP2,TIMP3,FFAR2,QSOX1,RSPO4,ZCCHC24,EDN1,IZUMO4,ANXA1,IFNGR1,ANXA3,PGAM1,MYOF,BGN,ANO6,SYP,TMEM173,PTGR2,PALD1,APBB1IP,FAM210A,DEPDC7,PLCB3,FAM234B,INF2,MRAS,CLDN15,PXDN,KIT,PLSCR4,ADSSL1,CD302,ALDOA,GAS6,MPND,MGLL,TAGLN,PKN3,SLC43A3,FAM129A,CXCR4,SNX33,PTGS2,RASIP1,PAPSS2,FAM129B,CAMK2N1,CHML,CKB,SH3BGR,CDKN2B,GSN,PLEKHA2,SUSD2,VEGFC,FMO2,GPR4,PRSS35,SORBS3,DHRS3,SULF2,RIT1,COL3A1,GPAM,TCEA3,PCDHB16,B9D2,SLC28A1,YPEL3,MAD2L1,ANKRD37,NARF,GPR68,GALNT18,PLOD2,PLAT,GIMAP6,CELSR1,ETS1,CLU,GIMAP8,PLB1,TGM1,PYCARD,EFEMP2,EFEMP1,SLC16A6,CAPN2,SLC16A3,SBF2,ZFP37,TGM2,RGS7,CD93,IGFBP5,ZBTB38,TMOD2,ACOT11,SPNS2,F2R,FRMD4A,ATP11A,NPNT,OLFM4,PLA2G15,CACNB1,COL4A2,COL4A1,MFNG,SELENOP,GPD1,S100A6,ADAM8,NUPR1,KANK3,PFKFB4,PFKFB3,NPR1,ARHGAP18,LPL,AK4,FBLN1,NDRG1,FBLN2,ACACB,SLC9A3R2,ADGRG1,PODXL,CALD1,IGFBP7,ANKZF1,PRNP,TGFB2,CRTAP,CAV2,ARHGEF39,CRIM1,MSN,SSC5D,FBXO32,SYT8,BMP6,COQ5,PTPRE,CXCL10,PTPRB,BMP2,PLCXD3,DAO,NR4A3,P4HA1,P4HA2,DMXL2,BHLHE40,CPE,ESAM,AMOTL2,FGFR4,PHF19,TUBA8,TRIM72,DOCK4,ACADVL,THRA,ITGB5,FHL1,SLC2A1,HSPB1,SLC2A5,HK2,TTC28,LBH,ALDH2,BDKRB2,ACP5,UPP1,CFAP45,BOK,PLEKHG1,EGFL7,EGFL6,ARHGEF15,SH2D3C,TBC1D8,FAM219A,SHROOM4,FGR,ACTA2,TGFBR3,PTP4A3,PKM,IRF1,ADGRF5,ALDH1A1,COL6A1,RBMS1,EVL,ITGA5,GAPDH,FBP1,RBMS3,ITIH5,PLEKHH2,KDM3A,SEMA3C,LRP1,CCDC68,LAMA4,SEMA3G,TTK,SEMA3F,TFPI,CXXC5,THBS1,AURKB,DLL4,NWD1,ATOH8,STOM,IGF2BP3,SLIT2,IGF2BP2,BAK1,PDLIM4,SLC12A4,CMTM3,MACC1,LYSMD2,PTPN14,MAB21L3,MYO1D,KLF7,PFKP","43","115.8","Epas1","false","false","Cluster 3","Clustered","7.7142857142857135","0","ENSMUSG00000024140"
"1347","","",,,"Wnt5a","false","false","Cluster 3","Clustered","7.2727272727272725","0","ENSMUSG00000021994"
"1345","Literature ChIP-seq,57;ARCHS4 Coexpression,163;Enrichr Queries,430;ReMap ChIP-seq,77;GTEx Coexpression,511","MT-ND5,MAML2,SCT,TMEM94,ABCA12,CLDN1,FGFRL1,GJA1,CREB3L3,CREB3L4,MYB,CYP1B1,HES7,DAPK1,SERPINF2,DHDH,AFAP1,RNASE4,BHLHA15,PDZK1,HSPG2,ISL1,EML1,RNASE1,SYTL2,CLDN6,CLDN4,RBP4,MYL7,CLDN9,BIN1,TEP1,RBP1,LGALS12,TYRO3,JTB,HOXB3,UQCRC2,MYL9,HPD,ASF1B,ENPEP,RETSAT,ABCB6,CFI,GATA4,PLA2G5,LDHB,CRACR2B,RDH11,ADAMTS17,PDGFC,HMOX1,S100A14,PPARGC1A,ST3GAL1,ST3GAL2,S100A11,SLC19A2,GSTM4,MYH7B,GSTM3,NFE2,JUN,FZD5,NEBL,TIPARP,FN1,FZD9,NFATC3,NFATC2,NR1D1,NR0B2,AIF1L,FOSL1,GJB1,PAM,FERMT2,PIGR,ARHGAP8,ATF7IP2,LPCAT1,PRKAG2,GPT,ADM,TFCP2L1,SHF,TMEM189,SULT1C2,C1QTNF1,FAM102A,AIFM1,TMEM44,TIMP3,TCP11L2,DLGAP4,TEAD4,EDARADD,RPS6KL1,ARG2,FGFBP1,LEFTY1,TPI1,ANXA3,ELOVL2,MYOF,ROM1,ANXA5,PAX6,F2,SLC39A14,PTGR2,TMEM37,PLCB3,SLC7A7,INF2,SLC7A8,BDH1,MMP15,PXDN,KCNMA1,RGN,RAPGEF5,PLCB1,VAMP2,GRAMD1A,RNASEL,OAT,PTAFR,GCNT1,NDUFA4L2,DLST,SNX33,AFP,SLC17A9,RASSF10,ALOX5,GCNT4,CKB,CHML,EGLN1,BIK,TMEM62,WWP1,PRSS35,FMO5,DHRS3,AGT,GUCA2A,SULF2,COL3A1,SNX16,CLCF1,SARM1,FOSB,MSRB3,COQ8A,LGR5,CCL28,YPEL3,TMEM229B,CHPF,EXOC3L4,GUCA1A,RORA,FBXO21,CLU,SLC8A1,MYLK3,PYCARD,EFEMP2,CDH2,SLCO2B1,NEK2,PLXNC1,SLC25A45,SLC16A3,SLC16A5,TLE2,PCYT2,SEMA6A,DGAT1,IGFBP5,FST,SEMA6D,MITF,NEAT1,CDC25C,CASD1,HIC2,SLC9A3,S100A6,S100A5,SLC27A6,AJUBA,SQSTM1,TRABD2B,REG3A,GPR119,INSIG1,NPTX1,SRGAP1,CPA6,BDNF,SLC4A11,CORO2A,MLXIPL,CXCL10,PTPRB,GGCX,LHX1,SP5,REEP6,ACO2,PLEKHM3,PIWIL4,MTCL1,CDCA7L,ARRB1,NRARP,PIK3C2B,PTER,ACP6,IDH3B,WDR6,SLC37A4,ADAMTS7,BCAS1,PLEKHG3,SLC13A1,SLC13A2,PLA2G12B,ITGA2,APOA1,APOA4,REXO2,DNAJC3,PTP4A3,PKM,MEP1A,ASPG,ANG,ACPP,DTL,SLC25A13,ITIH5,CEBPA,ACSS2,SMPX,SEMA3F,SRL,COCH,THSD4,TRIM47,E2F2,MAL2,RBBP7,ACSS1,TRIM40,MACC1,APOC3,FBXL16,SEMA4G,FRAS1,P2RX4,SERHL,NAGS,PPP1R14D,KCNK2,VIPR1,SPARC,FAM89B,FAM89A,GFI1,DIXDC1,LGALS3,RASSF6,DAG1,SOX9,THSD7A,ACAD11,SKP2,SCN1B,SLC12A8,HABP2,EPHB3,DYNC2H1,TMEM88B,EPHA4,SLC6A19,PAQR7,IL1R1,SLC11A2,ACSL5,TM4SF5,ADGRA3,ACSL3,KNL1,GCAT,CYP39A1,SOAT2,MGARP,PTGES,PDE1C,EPAS1,GIPR,MGST3,TSHZ2,LPAR3,PCBP4,SLAMF9,TSPAN4,SCN3A,CDR2,DECR1,PTPRN2,FER1L4,SPHKAP,REG4,IGF2,DCLK3,PYCR1,PTK6,NBEAL2,SMARCA1,TRERF1,CIDEC,PARP12,GADD45G,CCDC88B,TPX2,CCDC88A,RAET1E,AKR1B10,WNK2,CYP2S1,ECHDC1,SPATS2L,COL18A1,NRP2,ACY1,TENM4,DIRAS1,GBE1,CITED4,ICA1,STAB2,PTPRH,KHK,ROBO1,SERP2,HNF4A,CTSK,ANKRD1,QSOX1,FFAR2,ACADM,LMCD1,PSD,TMEM150A,TNFRSF12A,MME,IZUMO1,TUBG2,PROX1,ANO3,RAD51B,NR5A2,KIT,ALDOA,DNASE1L3,PDZRN3,SDCCAG8,TAGLN,SLC43A1,CXCR4,CRIP2,CAPG,HSD17B6,CRIP1,RASIP1,MFSD4A,RANBP3L,RXRA,CAMK2N1,TM4SF20,MSX1,EMC9,SH3BGR,SORBS2,PDZK1IP1,SH3RF2,TTC9,KRT18,XK,CSDC2,KLHL7,KIF26B,PCDHB16,TCEA3,GSTA1,TCEA2,ESYT1,FOXA3,FOXA1,SCARB1,SAMD9L,NARF,ACAA2,NDUFA10,CIB2,GXYLT2,JADE2,NR3C1,CELSR1,ETS1,TMEM143,RGS5,CAPN8,CAPN2,COTL1,GGT1,SBF2,ENPP7,GEN1,UNC5CL,CASR,CHRNB4,SPINK1,ADPRHL1,WNT5A,ANXA13,ANXA10,SDHA,SDHB,PRLR,ERN1,PLA2G15,GLTPD2,TMEM135,MYCN,COL4A2,DOK4,COL4A1,ODF3B,ANKS6,RTN2,RASL12,NDRG4,AKNA,CACNA1A,SLC1A3,CACNA1C,KLHL13,PLD1,FUT2,COX7A1,FUT1,NID2,CCNB2,ADGRG1,PODXL,ADGRG6,CYC1,CCDC141,MORC1,FAM83B,PRNP,FDPS,TGFB2,ACBD4,CRIM1,HMGA2,INHBB,SYT8,COQ5,EFNA1,SLC2A9,PLCXD3,EFNA3,BMP2,BAMBI,DLG4,BHLHE40,AMOTL2,AMOTL1,FGFR4,LRP11,ABCD4,THRB,THRA,SLC2A1,HSPB1,LDB3,DBI,LAMC2,DMKN,SLC2A6,HK2,TMEM220,DBP,ALDH2,CFAP45,HIST1H1C,DACT1,DDX58,PLAUR,H2AFV,ETV1,ETV4,SYNGR4,ETV5,SSTR5,ACTA2,OAS3,CDHR1,RBM20,NDUFS2,HCN4,LAMA5,NIM1K,TUFT1,PLA2G1B,RGS13,DNAH5,LEF1,ATP1A1,ADD3,AURKB,RASD2,GNG2,SPOCK2,GNA11,HES1,LRIG3,BUB1,GALNT5,ARID3A,MEIS2,RPIA,SLC4A8,CHPT1,SNTB1","162","247.6","Gata4","false","false","Cluster 3","Clustered","7.169696969696969","0","ENSMUSG00000021944"
"320","","",,,"Cyp39a1","false","false","Cluster 3","Clustered","8.192307692307692","0","ENSMUSG00000023963"
"2368","","",,,"AW011738","false","false","Cluster 3","Clustered","7.912087912087912","0","ENSMUSG00000078349"
"1344","","",,,"Ebpl","false","false","Cluster 3","Clustered","7.151515151515151","0","ENSMUSG00000021928"
"1343","","",,,"Ogdhl","false","false","Cluster 3","Clustered","7.03030303030303","0","ENSMUSG00000021913"
"1339","","",,,"Ldb3","false","false","Cluster 3","Clustered","7.2727272727272725","0","ENSMUSG00000021798"
"313","","",,,"Tiam2","false","false","Cluster 3","Clustered","7.5636363636363635","0","ENSMUSG00000023800"
"1335","","",,,"Rab3c","false","false","Cluster 3","Clustered","7.5636363636363635","0","ENSMUSG00000021700"
"2359","","",,,"Nxpe3","false","false","Cluster 3","Clustered","7.418181818181818","0","ENSMUSG00000075033"
"1334","ARCHS4 Coexpression,245;Enrichr Queries,973;GTEx Coexpression,391","FOXA1,RAB3C,GFI1,CELSR1,SCGN,DACH1,DPYSL5,KIF5C,BASP1,DPYSL3,KIF21A,KIF21B,VSTM5,MNX1,HOXA5,HOXA4,UNC5A,FST,IGFBP2,CASD1,TMEM130,ISL1,OLFM1,PLPP4,HOXB9,ZC2HC1A,MAP1B,LGALS12,HOXB3,LMX1B,HOXB8,SCG2,TSPYL4,BEX4,BEX3,BEX2,BRSK2,NRN1,CACNA1A,GATA4,C2CD4C,NREP,PCDH19,NEUROD1,NEUROD2,MAP2,PCBP4,SARAF,MAP6,NPTX1,NXPH1,NPTX2,TAC1,SCN3A,MAP9,TCAF1,DTNA,PTPRN2,MAGEE1,LRRN3,BDNF,FZD9,DCLK2,EVX1,ST18,REEP1,NBEA,H2AFY2,KLHDC8A,LHX1,PKIA,BHLHE40,ID4,SP5,SERINC1,LRRN1,XKR4,CNIH2,ZBTB8B,CD200,GPR27,PCSK1,NRP2,PODXL2,ONECUT3,PTPRN,TREH,CELF3,CELF6,BICD1,SHH,TUBA1A,SLC22A17,DNER,GDAP1L1,NEFL,TRIM67,PIANP,TMED8,PEG3,TPSG1,PAX6,SYP,MANEAL,PROX1,AP3B2,IMPACT,PTP4A3,TUBB2A,NR5A2,VGF,DDAH2,KCNMA1,HAP1,MAPT,HCN4,MAGEH1,CRMP1,AKAP7,HOXD13,CXXC4,AURKB,AP3M2,GNG2,GNG4,SV2A,SLIT1,GPC2,MSX1,SLIT2,APBB1,PAK3,CCDC184,ATOH1,REM2,RUNX1T1,MARCKSL1,ECEL1,MOCOS,IRX4,NAP1L3,SYT13,POU4F1,MEIS2,MORN4,NOVA2,PCDHB16,APBA1,INSM1,NECTIN3,CDK5R1","566","536.3","Otp","false","false","Cluster 3","Clustered","7.813186813186814","0","ENSMUSG00000021685"
"310","","",,,"Guca2a","false","false","Cluster 3","Clustered","7.961538461538462","0","ENSMUSG00000023247"
"1330","","",,,"Lpcat1","false","false","Cluster 3","Clustered","7.912087912087912","0","ENSMUSG00000021608"
"305","","",,,"Racgap1","false","false","Cluster 3","Clustered","7.912087912087912","0","ENSMUSG00000023015"
"2350","","",,,"Tldc2","false","false","Cluster 3","Clustered","6.9743589743589745","0","ENSMUSG00000074628"
"1322","","",,,"Gng4","false","false","Cluster 3","Clustered","7.418181818181818","0","ENSMUSG00000021303"
"298","","",,,"Pdia5","false","false","Cluster 3","Clustered","7.127272727272727","0","ENSMUSG00000022844"
"295","","",,,"Itgb5","false","false","Cluster 3","Clustered","8.03921568627451","0","ENSMUSG00000022817"
"2342","","",,,"Adh1","false","false","Cluster 3","Clustered","7.125","0","ENSMUSG00000074207"
"294","","",,,"Cpox","false","false","Cluster 3","Clustered","7.425","0","ENSMUSG00000022742"
"293","","",,,"Morc1","false","false","Cluster 3","Clustered","7.151515151515151","0","ENSMUSG00000022652"
"292","","",,,"Cblb","false","false","Cluster 3","Clustered","7.7142857142857135","0","ENSMUSG00000022637"
"1315","","",,,"Rdh12","false","false","Cluster 3","Clustered","7.5636363636363635","0","ENSMUSG00000021123"
"1312","","",,,"Sec23a","false","false","Cluster 3","Clustered","7.5636363636363635","0","ENSMUSG00000020986"
"287","","",,,"Srl","false","false","Cluster 3","Clustered","8.010989010989011","0","ENSMUSG00000022519"
"2333","","",,,"37316","false","false","Cluster 3","Clustered","7.151515151515151","0","ENSMUSG00000073481"
"1307","","",,,"Atp2a3","false","false","Cluster 3","Clustered","7.822222222222222","0","ENSMUSG00000020788"
"1306","","",,,"Galk1","false","false","Cluster 3","Clustered","7.961538461538462","0","ENSMUSG00000020766"
"1305","","",,,"Rab37","false","false","Cluster 3","Clustered","8.192307692307692","0","ENSMUSG00000020732"
"281","","",,,"Cideb","false","false","Cluster 3","Clustered","7.418181818181818","0","ENSMUSG00000022219"
"1304","","",,,"Rnf135","false","false","Cluster 3","Clustered","8.076923076923077","0","ENSMUSG00000020707"
"1303","","",,,"Rffl","false","false","Cluster 3","Clustered","7.03030303030303","0","ENSMUSG00000020696"
"278","","",,,"Ajuba","false","false","Cluster 3","Clustered","7.628571428571428","0","ENSMUSG00000022178"
"2326","ARCHS4 Coexpression,277;Enrichr Queries,302;GTEx Coexpression,437","MAML2,IRS1,DIXDC1,CBLB,RORA,FRY,NR3C1,CELSR1,GIMAP6,ETS1,SLC4A4,SLC8A1,DACH1,CDH2,BASP1,DPYSL5,DPYSL3,SACS,PLXNC1,SOX9,KIF21B,PPP1R16B,EPHA4,IGFBP5,LIMCH1,CACNA2D1,SEMA6D,TMOD2,PRKCA,FRMD4A,TANC2,OVOL2,GPRIN3,KATNAL1,CYP2U1,MAP1B,LGALS12,COL8A1,KCTD12,TNIK,PLPP3,MYL9,TRABD2B,CARD11,CDS1,RASL12,MACF1,AKNA,ARHGEF25,EPAS1,ZC4H2,RNF180,ITPR1,MGST1,ITPR2,CACNA1C,NREP,INPP5A,CALD1,MAP2,PDGFC,CYC1,RREB1,ST3GAL1,SCN3A,S100A11,PRNP,JUN,FZD3,ATP8B2,MCAM,FN1,ZBTB10,CRIM1,FZD9,MYO5A,DCLK2,ARHGAP24,ARHGAP32,FGF14,PTPRC,NBEA,MYO5B,RCAN2,PKIA,BHLHE40,RCAN3,PDE3A,MRVI1,FAT4,FERMT2,PHF19,ITM2C,DOCK4,THRB,TENM4,CELF2,PDE3B,GPR20,PTPRM,SLC7A11,SOBP,ITGAL,PITPNC1,SYNE2,SYNE1,ROBO1,LBH,TUBA1A,SH3PXD2A,SGCB,TCP11L1,ANXA6,CEP170,SUN2,CAMK1D,CNOT6L,TRPC1,TMC8,ETV1,ETV5,PARD3B,PARP8,ACTA2,ENAH,ARL4C,TGFBR3,PTP4A3,PLCB4,MMP16,SETBP1,TBC1D4,RASA3,PXDN,DPYD,KCNMA1,CDC42EP3,PDE5A,EVL,PLCB1,ALDOA,RBMS3,CD63,TAGLN,SEC23A,KDM3A,LEF1,FAM129A,CRMP1,CXCR4,NLRC3,ADD3,THBS1,AURKB,ABLIM1,GNG2,ALDH1B1,RAB23,SPOCK2,FLNA,MAL2,FYN,SLIT2,RUNX1T1,MDH2,SORBS2,SORL1,MEIS2,MAPK13,SULF2,KLF7,OSTM1,ABI2,PIK3IP1,SYT11,PCDHB16,MSRB3,FRYL,CDK5R1","266","338.7","Klf12","false","false","Cluster 3","Clustered","7.644444444444445","0","ENSMUSG00000072294"
"1301","","",,,"Efr3b","false","false","Cluster 3","Clustered","7.2727272727272725","0","ENSMUSG00000020658"
"274","","",,,"Bnip3l","false","false","Cluster 3","Clustered","7.719298245614034","0","ENSMUSG00000022051"
"1298","","",,,"Nampt","false","false","Cluster 3","Clustered","7.03030303030303","0","ENSMUSG00000020572"
"273","","",,,"Pbk","false","false","Cluster 3","Clustered","8.318181818181818","0","ENSMUSG00000022033"
"2319","","",,,"Cited4","false","false","Cluster 3","Clustered","8.010989010989011","0","ENSMUSG00000070803"
"2318","","",,,"Rnf186","false","false","Cluster 3","Clustered","8.192307692307692","0","ENSMUSG00000070661"
"1294","","",,,"Efemp1","false","false","Cluster 3","Clustered","7.0","0","ENSMUSG00000020467"
"1293","","",,,"Cfap36","false","false","Cluster 3","Clustered","7.466666666666667","0","ENSMUSG00000020462"
"1288","","",,,"Pdlim4","false","false","Cluster 3","Clustered","8.076923076923077","0","ENSMUSG00000020388"
"263","ARCHS4 Coexpression,330;Enrichr Queries,372;GTEx Coexpression,422","FOXA1,ANKRD35,FAM89B,IRS1,SDR9C7,CWH43,CELSR1,ABCA12,ESPN,AQP3,CLDN1,SOGA1,TGM1,BASP1,CHEK2,DAG1,CYP1B1,LIPK,SOX9,FADS1,EPHB3,SEMA6A,WNT5A,IGFBP2,SYTL1,SHISA2,NPNT,ISL1,MYT1,OLFM1,MYL7,COL4A2,DOK4,LGALS12,LY6D,LMX1B,EPHA1,AJUBA,PTGES,NRN1,IGSF3,EPAS1,CTTNBP2,TSHZ2,CACNA1B,PLA2G3,IL20RB,CACNA1A,GATA4,LPAR3,NDRG1,ACACA,KLC3,RDH12,STC2,S100A14,KCNN4,NPTX2,TAC1,FAM83B,WNT3,ZBTB7C,JAG2,PTPRN2,BDNF,NEBL,TMEM132A,FZD9,IFFO2,PTK6,INHBB,FBXO32,SYT8,ACER1,SDK1,CXCL10,EFNA3,BMP2,GJB4,FXYD3,LYPD6B,LHX1,WNK2,BHLHE40,SP6,ID4,COL18A1,CCDC120,SLC35F2,HSPB8,HSPB1,LAMC2,ADM,TFCP2L1,DMKN,ELFN1,NKPD1,CASP14,C1QTNF1,ANXA8,CERS3,FGFBP1,CLUH,MME,TNFRSF19,TMEM40,PAX6,REXO2,ETV4,CBFA2T3,SERPINB5,ETV5,ALDH1A3,ANO1,PTP4A3,PLCB3,MMP15,CDHR1,PXDN,KCNMA1,CDH13,ARHGEF4,DSG3,SHANK2,MDFI,HCN4,LAMA5,SEMA3C,TUFT1,LEF1,LAMA3,CRMP1,ALOX12B,SEMA3F,THBS1,BARX2,AURKB,FAM129B,SCEL,RASD1,RASSF10,GPC1,RNF39,MAL2,SPTSSB,MSX1,SLIT2,MROH6,ALOXE3,HES2,GPR157,EGLN3,PPP1R14C,AHNAK2,MOCOS,GRHL3,KRT10,MEIS2,SH3RF2,KRT18,COL7A1,KIF26B,PCDHB16,FOSB,INSM1,NECTIN4","322","374.7","Irx4","false","false","Cluster 3","Clustered","6.871794871794871","0","ENSMUSG00000021604"
"259","","",,,"Edn1","false","false","Cluster 3","Clustered","8.088235294117647","0","ENSMUSG00000021367"
"2307","","",,,"Selenbp1","false","false","Cluster 3","Clustered","8.308823529411764","0","ENSMUSG00000068874"
"2305","","",,,"Slc4a5","false","false","Cluster 3","Clustered","7.644444444444445","0","ENSMUSG00000068323"
"257","","",,,"Abcd4","false","false","Cluster 3","Clustered","7.973856209150327","0","ENSMUSG00000021240"
"256","","",,,"Papln","false","false","Cluster 3","Clustered","6.9743589743589745","0","ENSMUSG00000021223"
"255","","",,,"Otub2","false","false","Cluster 3","Clustered","7.822222222222222","0","ENSMUSG00000021203"
"253","","",,,"Chga","false","false","Cluster 3","Clustered","8.235294117647058","0","ENSMUSG00000021194"
"2301","","",,,"Cenpm","false","false","Cluster 3","Clustered","7.466666666666667","0","ENSMUSG00000068101"
"2299","","",,,"Myl9","false","false","Cluster 3","Clustered","8.307692307692308","0","ENSMUSG00000067818"
"1274","","",,,"Vnn3","false","false","Cluster 3","Clustered","8.181818181818182","0","ENSMUSG00000020010"
"244","","",,,"Rflnb","false","false","Cluster 3","Clustered","7.275","0","ENSMUSG00000020846"
"2291","","",,,"Rdh11","false","false","Cluster 3","Clustered","7.2727272727272725","0","ENSMUSG00000066441"
"242","","",,,"Tmem94","false","false","Cluster 3","Clustered","8.076923076923077","0","ENSMUSG00000020747"
"2288","","",,,"Anks6","false","false","Cluster 3","Clustered","7.127272727272727","0","ENSMUSG00000066191"
"239","","",,,"Pxdn","false","false","Cluster 3","Clustered","7.418181818181818","0","ENSMUSG00000020674"
"1263","","",,,"Rgs17","false","false","Cluster 3","Clustered","7.5636363636363635","0","ENSMUSG00000019775"
"238","","",,,"Kif3c","false","false","Cluster 3","Clustered","6.9743589743589745","0","ENSMUSG00000020668"
"1261","","",,,"Rps6kl1","false","false","Cluster 3","Clustered","8.192307692307692","0","ENSMUSG00000019235"
"2284","","",,,"Gpbar1","false","false","Cluster 3","Clustered","7.912087912087912","0","ENSMUSG00000064272"
"236","","",,,"Rgs9","false","false","Cluster 3","Clustered","7.457142857142857","0","ENSMUSG00000020599"
"234","","",,,"Gatsl3","false","false","Cluster 3","Clustered","8.318181818181818","0","ENSMUSG00000020424"
"2277","","",,,"Fbln2","false","false","Cluster 3","Clustered","8.0","0","ENSMUSG00000064080"
"228","","",,,"Stc2","false","false","Cluster 3","Clustered","8.161764705882353","0","ENSMUSG00000020303"
"1250","","",,,"Copz2","false","false","Cluster 3","Clustered","7.2727272727272725","0","ENSMUSG00000018672"
"226","","",,,"Srgap1","false","false","Cluster 3","Clustered","8.014705882352942","0","ENSMUSG00000020121"
"2274","","",,,"Mapk15","false","false","Cluster 3","Clustered","7.2727272727272725","0","ENSMUSG00000063704"
"225","","",,,"Lrig3","false","false","Cluster 3","Clustered","8.192307692307692","0","ENSMUSG00000020105"
"1247","","",,,"Trpv2","false","false","Cluster 3","Clustered","7.912087912087912","0","ENSMUSG00000018507"
"1243","","",,,"Gdap1l1","false","false","Cluster 3","Clustered","7.03030303030303","0","ENSMUSG00000017943"
"215","ARCHS4 Coexpression,52;Enrichr Queries,47;GTEx Coexpression,970","SPARC,MKI67,ZDHHC2,MYLK,GLS,LGALS3,GJA1,NIPAL2,DPYSL3,DZIP1L,CYP1B1,KIF21B,SOX9,MNX1,IER3,CHGB,EPHA4,TRIQK,LIMCH1,DAPK1,CACNA2D1,KCNK16,P3H3,TM4SF4,VWA5B2,ISL1,ASRGL1,RFX6,RRAGD,SERPING1,KCTD12,MXRA7,PLPP3,MYL9,EPAS1,GIPR,MAGED1,GHRHR,PDGFC,TRPM5,RAB11FIP4,NKX2-2,FZD1,JUN,PTPRN2,ABCA5,PLK2,FN1,IGF2,FZD9,SLC16A12,A1CF,ST18,GADD45G,COL1A2,FXYD2,CYP2S1,ID4,MAGED2,FAT4,PAM,ITM2C,CDKN1C,PCSK1,BTG2,TENM3,PTPRN,PCSK9,ADM,ROBO1,FFAR4,TIMP2,TIMP3,FFAR1,EDARADD,PCYT1B,ANXA1,MME,ANXA3,SLC2A10,ITPK1,BGN,PAX6,BACE1,GPRC5B,FAM222A,SLC7A8,PXDN,KIT,CDC42EP3,CRYAB,MGLL,MATN2,SAMD5,TAGLN,GCNT1,FAM129A,CRYBA2,SNX33,PTGS2,GNAI1,PAPSS2,CKB,RUNX1T1,GSN,SORBS2,GCG,SLC8B1,GCK,SULF2,TTC8,COL3A1,GPR142,QPCT,PCDHB16,RIMBP2,FOSB,MSRB3,NUCB2,IRS1,TUSC3,PLOD2,PLAT,RORA,CELSR1,ETS1,CLU,FADS2,SCGN,EFEMP1,DACH1,CDH2,BASP1,ADORA1,HADH,TGM2,PPP1R16B,POSTN,CASR,IGFBP5,FST,WNT5A,F2R,IGFBP2,TTC7B,ANXA10,COL4A2,COL4A1,SCG5,SCG3,PHLDB2,SCG2,EMID1,CUL7,PARM1,LPL,NREP,CACNA1C,NDRG2,NDRG1,NID2,NEUROD1,SNN,PCSK1N,CALD1,IGFBP7,RAI2,ASIC1,PRNP,TGFB2,ADAP1,CORO2B,CXCL10,MLXIPL,MAP3K15,PLCXD3,NR4A3,BHLHE40,CPE,LRP11,ITGB5,CELF3,SLC2A1,ATP2A3,UNC80,PEG3,CHPF2,ABCC8,H2AFV,SSTR1,SYNGR4,SSTR3,ARL4C,ACTA2,TGFBR3,PTP4A3,COL6A1,ITGA9,SMIM24,SEMA3C,RGS16,TFPI,THBS1,CXXC4,AURKB,SLIT1,D2HGDH,FYN,FSD1,SLIT2,CHGA,CADPS,PDX1,MEIS2,KBTBD11,BAIAP3,POMC,FAM167A,INSM1","295","356.3","Plagl1","false","false","Cluster 3","Clustered","8.318181818181818","0","ENSMUSG00000019817"
"2262","","",,,"Ces1e","false","false","Cluster 3","Clustered","7.2727272727272725","0","ENSMUSG00000061959"
"213","","",,,"Sema6a","false","false","Cluster 3","Clustered","8.03921568627451","0","ENSMUSG00000019647"
"2261","","",,,"Suclg2","false","false","Cluster 3","Clustered","7.418181818181818","0","ENSMUSG00000061838"
"1235","","",,,"Lamp2","false","false","Cluster 3","Clustered","7.777777777777778","0","ENSMUSG00000016534"
"1233","","",,,"1700016C15Rik","false","false","Cluster 3","Clustered","8.010989010989011","0","ENSMUSG00000015962"
"1232","ARCHS4 Coexpression,32;Enrichr Queries,15;GTEx Coexpression,92","STMN3,AQP4,ABAT,MYLK,GJA1,CHEK2,DPYSL3,CYP1B1,SOX9,IER3,EPHA4,UNC5A,RBFOX3,LIMCH1,MAPK8IP2,HPCAL4,MTURN,DKK3,SYTL2,MAPK8IP1,MAP1B,MAP1A,LGALS12,KCTD12,PLPP3,CTXN1,PFN2,BEX4,TTYH1,EPAS1,STXBP1,TTBK1,MAP2,STC2,PDGFC,SPTBN2,JUN,PTPRN2,CADM4,PLK2,ST8SIA3,FN1,FZD9,DCLK2,MYO5A,ID4,ITM2C,SCN2B,TMEM151B,TENM4,NCAN,DIRAS1,DIRAS2,GRIK4,SLC35F1,ADM,SLC7A11,ROBO1,JPH4,SERP2,CAMKV,SLC22A17,TIMP2,IDS,TIMP3,KIF1A,PSD,PCYT1B,EDN1,MME,SYP,SYN2,SYN1,GPRC5B,MMP17,PXDN,KIT,KCNMA1,ARHGEF4,MAPT,PLCB1,RAPGEF5,MGLL,VAMP2,MATN2,RAPGEF4,NAPB,CXCR4,SNX32,PTGS2,PHYHIP,CAMK2N1,CKB,APBB1,GABRD,CGREF1,GABBR2,SORBS2,NMNAT2,TUBB4A,GRIN1,SULF2,ABI2,MORN4,FKBP1B,PCDHB16,APBA1,CDK5R1,RAB3C,PLAT,RORA,CELSR1,ETS1,CLU,RGS4,RIMS4,EFEMP1,CDH2,KIF5C,BASP1,PALM,ADORA1,SH2D5,LZTS1,PPFIA4,FADS1,RGS7,PPP1R16B,KCNH3,IGFBP5,FST,SEMA6D,MAGI2,WNT5A,IGFBP2,TMOD2,APLP1,RUNDC3A,TMEM130,CLIP3,OLFM1,COL4A2,COL4A1,SELENOP,SCG3,TNIK,BRSK1,NDRG4,CEMIP,BRSK2,CTTNBP2,ARHGEF25,ARL3,HPCA,ABHD8,SLC1A3,CACNA1A,LPL,NREP,NDRG2,CPLX2,NDRG1,RAP1GAP,PDZD4,SNN,ADGRG1,HRH3,PODXL,KIF3C,NPTX2,RAB6B,MYH10,PACSIN1,ASIC1,SYT5,KCNF1,PRNP,TGFB2,MT3,CORO2B,GNAO1,CXCL10,NR4A3,NBEA,DLG4,RCAN2,BHLHE40,REEP2,CPE,CSPG5,SNAP25,THRA,CELF2,RASGRF1,CELF3,SCRN1,MCF2L,SULT4A1,PIANP,ETV1,FAM219A,DNM1,ARL4C,ALDH1A3,PTP4A3,CAMK2B,NIM1K,SEMA3C,LEF1,THBS1,AURKB,NCALD,DLL3,DDN,SV2A,NCAM2,SLIT2,STOX1,CACNG4,MAPK4,MARCKSL1,KCNIP3,FBXL16,SORL1,MEIS2,KBTBD11,NFASC,SYT11","14","46.33","Arnt2","false","false","Cluster 3","Clustered","7.418181818181818","0","ENSMUSG00000015709"
"207","","",,,"Cd68","false","false","Cluster 3","Clustered","7.822222222222222","0","ENSMUSG00000018774"
"1227","","",,,"Map2","false","false","Cluster 3","Clustered","7.0","0","ENSMUSG00000015222"
"203","","",,,"Anxa6","false","false","Cluster 3","Clustered","7.644444444444445","0","ENSMUSG00000018340"
"2250","","",,,"Cyp2c70","false","false","Cluster 3","Clustered","7.418181818181818","0","ENSMUSG00000060613"
"1226","","",,,"Casd1","false","false","Cluster 3","Clustered","8.076923076923077","0","ENSMUSG00000015189"
"1224","","",,,"Tppp3","false","false","Cluster 3","Clustered","7.644444444444445","0","ENSMUSG00000014846"
"2244","","",,,"Ptp4a3","false","false","Cluster 3","Clustered","7.813186813186814","0","ENSMUSG00000059895"
"1220","","",,,"Bcas1","false","false","Cluster 3","Clustered","7.813186813186814","0","ENSMUSG00000013523"
"194","","",,,"Gsdma","false","false","Cluster 3","Clustered","7.151515151515151","0","ENSMUSG00000017204"
"2239","","",,,"Mfsd4a","false","false","Cluster 3","Clustered","7.644444444444445","0","ENSMUSG00000059149"
"2238","","",,,"Rad51b","false","false","Cluster 3","Clustered","7.418181818181818","0","ENSMUSG00000059060"
"2237","","",,,"Cfi","false","false","Cluster 3","Clustered","7.425","0","ENSMUSG00000058952"
"2234","","",,,"Serhl","false","false","Cluster 3","Clustered","7.813186813186814","0","ENSMUSG00000058586"
"184","","",,,"Qdpr","false","false","Cluster 3","Clustered","7.628571428571428","0","ENSMUSG00000015806"
"1206","","",,,"Sardh","false","false","Cluster 3","Clustered","8.181818181818182","0","ENSMUSG00000009614"
"1204","","",,,"Trpm5","false","false","Cluster 3","Clustered","8.181818181818182","0","ENSMUSG00000009246"
"1203","","",,,"Mgst1","false","false","Cluster 3","Clustered","7.912087912087912","0","ENSMUSG00000008540"
"1202","","",,,"Fut1","false","false","Cluster 3","Clustered","8.318181818181818","0","ENSMUSG00000008461"
"178","","",,,"Kif1a","false","false","Cluster 3","Clustered","7.466666666666667","0","ENSMUSG00000014602"
"1198","","",,,"Krt23","false","false","Cluster 3","Clustered","8.192307692307692","0","ENSMUSG00000006777"
"1195","","",,,"Rundc3a","false","false","Cluster 3","Clustered","8.161764705882353","0","ENSMUSG00000006575"
"168","","",,,"Kdelr3","false","false","Cluster 3","Clustered","7.457142857142857","0","ENSMUSG00000010830"
"1191","","",,,"Fbln1","false","false","Cluster 3","Clustered","7.2727272727272725","0","ENSMUSG00000006369"
"166","","",,,"Sdhb","false","false","Cluster 3","Clustered","8.076923076923077","0","ENSMUSG00000009863"
"2214","","",,,"Prelid2","false","false","Cluster 3","Clustered","8.308823529411764","0","ENSMUSG00000056671"
"164","","",,,"Gprc5b","false","false","Cluster 3","Clustered","7.418181818181818","0","ENSMUSG00000008734"
"163","","",,,"Fgfrl1","false","false","Cluster 3","Clustered","7.418181818181818","0","ENSMUSG00000008090"
"162","","",,,"Fzd3","false","false","Cluster 3","Clustered","7.2727272727272725","0","ENSMUSG00000007989"
"1184","","",,,"Zfp287","false","false","Cluster 3","Clustered","8.076923076923077","0","ENSMUSG00000005267"
"2204","","",,,"Ces2a","false","false","Cluster 3","Clustered","7.813186813186814","0","ENSMUSG00000055730"
"1179","","",,,"Ndrg2","false","false","Cluster 3","Clustered","7.2727272727272725","0","ENSMUSG00000004558"
"155","","",,,"Neurl1a","false","false","Cluster 3","Clustered","7.371428571428571","0","ENSMUSG00000006435"
"154","","",,,"Ggt1","false","false","Cluster 3","Clustered","7.0","0","ENSMUSG00000006345"
"2201","","",,,"Unc80","false","false","Cluster 3","Clustered","7.822222222222222","0","ENSMUSG00000055567"
"153","","",,,"Ankrd13d","false","false","Cluster 3","Clustered","8.076923076923077","0","ENSMUSG00000005986"
"152","","",,,"Rcn1","false","false","Cluster 3","Clustered","7.7142857142857135","0","ENSMUSG00000005973"
"151","","",,,"Ephb3","false","false","Cluster 3","Clustered","8.235294117647058","0","ENSMUSG00000005958"
"2198","","",,,"Soga1","false","false","Cluster 3","Clustered","6.9743589743589745","0","ENSMUSG00000055485"
"1173","","",,,"Dll3","false","false","Cluster 3","Clustered","7.5636363636363635","0","ENSMUSG00000003436"
"147","","",,,"Slc1a3","false","false","Cluster 3","Clustered","7.127272727272727","0","ENSMUSG00000005360"
"1170","","",,,"Cacnb3","false","false","Cluster 3","Clustered","7.457142857142857","0","ENSMUSG00000003352"
"141","","",,,"Rab23","false","false","Cluster 3","Clustered","7.644444444444445","0","ENSMUSG00000004768"
"2186","","",,,"9130230L23Rik","false","false","Cluster 3","Clustered","7.813186813186814","0","ENSMUSG00000054598"
"137","ARCHS4 Coexpression,57;Enrichr Queries,166;GTEx Coexpression,135","CHIC1,DIXDC1,ABAT,SLC4A4,MYLK,GJA1,CHEK2,DPYSL3,SOX9,WLS,HOXA4,EPHA4,EPHA7,UNC5A,LIMCH1,SERPINF2,ACSL3,MAPK8IP2,EML1,HPCAL4,MTURN,DKK3,MAPK8IP1,PPP1R3C,MAP1A,KCNQ4,PLPP3,NRN1,EPAS1,STXBP1,CFI,FAM149A,INPP5A,MAP6,TSPAN2,PPARGC1A,BBS1,CDK18,FZD3,JUN,FZD7,PLK2,ST8SIA3,FN1,IGF2,NR1D1,A1CF,POU6F1,PEX5L,GJB1,ID4,FAT4,ITM2C,SCN2B,NRP2,BTG2,TMEM151B,DIRAS1,DIRAS2,JPH4,HNF4A,IDS,TIMP3,RNF150,KIF1A,PSD,MME,DENND2A,GFRA1,SYP,F2,SLC39A14,SYN2,SYN1,PLCB4,KIT,KCNMA1,PXDN,PLCB1,RAPGEF5,PDZRN3,MGLL,VAMP2,MATN2,RAPGEF4,NAPB,FAXC,ATL1,PELI3,PRUNE2,VWCE,PHYHIP,SLC17A9,CAMK2N1,CKB,TAF9B,GABRD,RUNX1T1,BCHE,IL33,GABBR2,EGLN3,GSN,KCNB1,KCNB2,SORBS2,FMO4,FMO5,DHRS3,AGT,GRIN1,FABP1,ALDH4A1,ABI2,PCDHB16,FOSB,KLB,IRS1,RORA,OGDHL,NR3C1,CLU,RGS4,EFEMP1,PPFIA4,FADS1,TGM2,PPP1R16B,ABCG5,DGAT2,G6PC,IGFBP5,TMOD2,TTC7B,PIPOX,NPNT,RUNDC3A,CLIP3,OLFM1,CACNB3,SELENOS,SELENOP,BRSK1,NDRG4,PARM1,ARHGEF25,ZC4H2,ITPR1,CACNA1A,LPL,NREP,NDRG2,CPLX2,NDRG1,CACNA1H,NPAS2,RAP1GAP,SCUBE1,CALD1,ADGRG6,RAB6B,PACSIN1,KCNF1,PRNP,CBX6,RBPMS,EPHX2,CRIM1,KLHL23,FBXO32,SYT7,REEP1,GNAO1,CXCL10,MLXIPL,NR4A3,NBEA,DLG4,RCAN2,BHLHE40,SP5,FGFR4,SNAP25,THRB,THRA,RASGRF1,SOBP,SYNE1,SULT4A1,PEG3,TRPC1,ETV1,KLF15,ETV4,PRODH2,ETV5,DNM1,TGFBR3,PTP4A3,CRY2,ALDH1A1,SHANK2,CAMK2B,CEBPA,SEC23A,LRP3,SEMA3E,THBS1,NCALD,AURKB,DDN,ABLIM1,SV2A,MXI1,NT5DC3,SLIT1,SLIT2,COL26A1,FBXL16,SEMA4G,MEIS2,SORL1,RPIA,NFASC,FMNL2,FAM131A,TRIM38,SNTB1","46","119.3","Hlf","false","false","Cluster 3","Clustered","7.3983739837398375","0","ENSMUSG00000003949"
"2185","","",,,"Lclat1","false","false","Cluster 3","Clustered","7.813186813186814","0","ENSMUSG00000054469"
"1157","","",,,"Kcnh6","false","false","Cluster 3","Clustered","7.2727272727272725","0","ENSMUSG00000001901"
"1156","Literature ChIP-seq,120;ARCHS4 Coexpression,1246;Enrichr Queries,621;GTEx Coexpression,270","FOXA1,MDC1,RAB3C,DIXDC1,RORA,CELSR1,ETS1,MYLK,SYDE2,SCGN,GJA1,DACH1,DPYSL3,SCMH1,MYB,CYP1B1,PLS3,SOX9,MNX1,HOXA5,HOXA4,KCNH2,HES7,EPHA7,WNT5B,IGFBP5,FST,WNT5A,IGFBP2,AFAP1,FRMD4A,ISL1,EML1,MID1,TMEM252,SELENOM,HOXB9,COL4A2,SMO,COL4A1,RAB37,HOXB4,KCNQ4,HOXB3,LMX1B,HOXB8,NBL1,MYL9,NRN1,ARHGEF25,ZC4H2,MGST3,CACNA1A,LPL,GATA4,CACNA1C,CFP,CACNA1H,RACGAP1,CALD1,TSPAN2,CPA6,TRAP1,GSTM2,CRTAP,JUN,DTNA,OSBPL5,BDNF,FZD7,PLK1,FN1,IGF2,FZD9,HMGA2,EVX1,KLHL23,SSC5D,FOSL1,BMP3,CXCL10,BMP2,COL1A2,LHX1,FEV,BHLHE40,ID4,LGMN,RET,COL18A1,NRP2,BTG2,TGFB1I1,PDE3B,STAB2,ADM,FOXM1,LMNB1,BOC,NEFL,TIMP3,RAC3,RNF150,UPP1,LBR,ABCC4,CLUH,PGAM1,ETV1,GFRA1,PAX6,ETV4,ALDH1A3,PTP4A3,NR5A2,SETBP1,ESPL1,COL6A1,KCNMA1,PXDN,KIT,CDC42EP3,BIRC5,PLEKHO1,PDE5A,PDZRN3,DTL,MATN2,LAMA5,CEBPA,SEMA3C,PKN3,CCDC69,PRUNE2,LEF1,LRP3,TTK,PTGS2,THBS1,AURKB,NEURL1B,GNG2,RAB23,POLD1,NT5DC3,MSX1,SLIT2,RBBP7,PDLIM4,JAZF1,CENPU,CDKN2B,PRRX1,SORBS2,MEIS2,POU4F1,TICRR,SLC4A7,COL3A1,CENPF,KLHL5,ABI2,PCDHB16,MSRB3,FOSB,NCAPD2,INSM1","611","564.3","Hoxd13","false","false","Cluster 3","Clustered","7.644444444444445","0","ENSMUSG00000001819"
"132","","",,,"Rabac1","false","false","Cluster 3","Clustered","7.961538461538462","0","ENSMUSG00000003380"
"128","","",,,"Scin","false","false","Cluster 3","Clustered","7.5636363636363635","0","ENSMUSG00000002565"
"127","","",,,"Aif1l","false","false","Cluster 3","Clustered","7.912087912087912","0","ENSMUSG00000001864"
"126","","",,,"Smo","false","false","Cluster 3","Clustered","7.2727272727272725","0","ENSMUSG00000001761"
"2172","","",,,"Aldh1a1","false","false","Cluster 3","Clustered","7.2727272727272725","0","ENSMUSG00000053279"
"123","","",,,"Itgb7","false","false","Cluster 3","Clustered","7.2727272727272725","0","ENSMUSG00000001281"
"122","","",,,"Pcbp3","false","false","Cluster 3","Clustered","7.5636363636363635","0","ENSMUSG00000001120"
"1145","","",,,"Slc26a3","false","false","Cluster 3","Clustered","7.03030303030303","0","ENSMUSG00000001225"
"1144","","",,,"Slc13a2","false","false","Cluster 3","Clustered","7.912087912087912","0","ENSMUSG00000001095"
"118","","",,,"Gcg","false","false","Cluster 3","Clustered","7.03030303030303","0","ENSMUSG00000000394"
"2166","","",,,"Plekhg3","false","false","Cluster 3","Clustered","7.7142857142857135","0","ENSMUSG00000052609"
"1142","","",,,"S100a5","false","false","Cluster 3","Clustered","7.0","0","ENSMUSG00000001023"
"116","","",,,"Th","false","false","Cluster 3","Clustered","7.5636363636363635","0","ENSMUSG00000000214"
"2163","","",,,"Mogat2","false","false","Cluster 3","Clustered","8.318181818181818","0","ENSMUSG00000052396"
"113","Literature ChIP-seq,7;ARCHS4 Coexpression,181;Enrichr Queries,184;ReMap ChIP-seq,174;GTEx Coexpression,215","CNTFR,AVIL,ABAT,MRGPRE,SLC4A4,CLDN1,FGFRL1,LIPE,GJA1,CREB3L3,CREB3L4,DPYSL3,LIPG,AP1S2,CYP1B1,HOMER3,HOXA5,HOXA4,IER3,WLS,HES7,TSPYL2,DNAAF3,DKK2,SYTL2,CLDN6,CLDN4,HOXB9,CLDN9,RBP1,HOXB4,TYRO3,JTB,HOXB3,SERPING1,HOXB8,TSPYL4,ABCB6,TTYH1,CFI,SLCO5A1,DYNC2LI1,HSD11B2,CRACR2B,RDH11,PDGFC,GRPEL2,HMOX1,ST3GAL1,RREB1,SLC19A2,JUN,FZD3,CADM4,BTBD17,FZD5,NEBL,PLK2,FN1,ABCA7,NR1D1,GPR137B,FOSL1,COL1A2,GJB4,SLC6A9,H2AFY2,CYP1A1,FAT4,CDKN1C,BTG2,ARHGAP8,NCAN,GPR20,GPT,ADM,PRSS22,RCSD1,SLC6A3,OSBPL10,SLC6A4,TMEM189,TUBA1B,FAM102A,CSRP2,IMPA2,TRIM3,ANXA6,TIMP3,NEFM,EMB,RNF150,DLGAP4,LEFTY1,RPS6KL1,TPI1,ANXA1,CNOT6L,MYBPC2,TPSG1,ANXA3,ELOVL2,MYOF,ROM1,BGN,PAX4,TMC8,COPZ2,PAX6,GCHFR,MMP11,GPRC5B,PLCB3,RIPPLY3,TUBB2A,PXDN,DPYD,ADSSL1,PTRH1,PPARA,PAFAH1B3,CRYAB,VAMP2,MDFI,PHLPP1,ECHS1,PKN3,KCNA1,PELI3,COL11A2,PTGS2,FSTL4,FAM129B,RASSF10,FLNA,SC5D,CKB,RUNX1T1,LRRC26,CDKN2B,GSN,F10,ECEL1,NR1H3,DHRS3,AGT,GUCA2A,SULF2,SPSB2,COL3A1,ABI2,CLCF1,AGBL3,FOSB,TMEM229A,LGR5,ANKRD13D,CHPF,IRS1,CHRM4,PLOD2,CLU,TNF,RIMS4,EFEMP2,DEPTOR,EFEMP1,FGF9,CDH2,FCGRT,ADORA1,NUDT19,TNR,PLS3,PIM2,SLC25A45,SLC16A3,FADS1,SLC16A5,KCNH2,SEMA6B,RAB2B,BNIP3L,KCNH3,PCYT2,SEMA6A,DGAT1,IGFBP5,FST,DIO1,NEAT1,CACNB1,ACAP3,OLFM1,CACNB3,DMWD,S100A6,S100A5,TNIK,IGFALS,SQSTM1,SLC27A5,OSBP2,KHDRBS3,PFKFB3,GPR119,HVCN1,ABHD8,SLC9A3R2,IGSF21,ZFP57,SDF2L1,GFPT2,TMEM132A,ADAP1,CORO2B,KY,CXCL10,PTPRE,PTPRC,P4HA2,SP6,CPE,CSPG5,SPIRE1,MAFK,ESAM,REEP6,CNIH2,MIPEP,KCNK6,SNAP25,MTCL1,NRARP,PIK3C2B,SCRN1,BOC,WDR6,ITGB7,SLC37A3,ADGRV1,PEG3,TRPC4,ITGA2,APOA4,REXO2,ARL4C,PTP4A3,PKM,LCK,EVL,CEBPA,SEMA3C,SLC5A11,CXXC5,ABLIM1,ABLIM2,SH3BP1,TRIM47,IGF2BP3,D2HGDH,RFFL,STOX1,CACNG4,SEC11C,KCNJ5,MARCKSL1,PPP1R14C,PRRX1,TRPA1,KCNJ11,SMOX,KCNIP3,APOC3,FOXJ1,SYT14,SEMA4G,MERTK,MCOLN2,KBTBD11,BAIAP3,NFASC,SYT11,CTH,NAGS,PPP1R14D,KCNK2,SPARC,FAM89B,THSD7B,PANK1,AQP9,AQP4,LDLRAD3,MKI67,SOGA1,ICAM1,LGALS3,RINL,OPHN1,RASSF5,RPS6KA2,DAG1,LONP1,KIF21B,ACAD11,EPHB3,TMEM88B,EPHA4,SLC34A2,SLC6A19,RSAD2,PAQR4,ADGRA3,ACSL3,MYO7A,CPT1C,MFSD11,MAPK8IP2,ASRGL1,GCAT,MAPK8IP1,KCTD12,PLPP3,CTXN1,NBL1,STX1A,CFTR,MAOB,GIPR,EPAS1,ARX,MGST1,NEU3,RACGAP1,PGBD5,MAP2,STC2,TSPAN6,TSPAN4,ST8SIA6,TSPAN2,SNX8,RAB11FIP4,RAB11FIP5,DTNA,FAM78A,ST8SIA3,IGF2,DCLK2,PYCR1,RAB27A,MYO5A,PTK6,NBEAL2,RAB27B,PARP12,GADD45G,GNG13,NET1,TPX2,TH,KLHDC8A,CYP2S1,ID4,SPATS2L,KYAT1,ITM2C,MOGAT2,DIRAS1,SLC35F1,SLC7A11,PTPRH,ROBO1,LIMD2,HERPUD1,SERP2,GYS1,CTSL,HNF4A,CTSK,STBD1,CTSF,PSD,CD53,PCYT1B,EDN1,ATP6V0B,TNFRSF12A,IZUMO1,ANO8,ANO9,GPBAR1,AP3B2,PDRG1,KIF9,CLDN15,ARHGEF4,ALDOC,ALDOA,SYNC,FJX1,ARHGEF6,MATN2,SDCCAG8,TLR2,AMER2,C1QA,TAGLN,CXCR4,CAPG,CRIP2,CRIP1,RASIP1,CST3,SCEL,RANBP3L,OS9,CAMK2N1,WIF1,GPC1,PAK3,GABRD,ARNT2,PTGES2,PLEKHA2,SUSD2,ETNPPL,CYP2W1,HIST3H2A,KRT18,KLHL5,CSDC2,PCDHB16,ESYT1,FOXA3,NEUROG3,FOXA1,TPSB2,NARF,ACAA2,GOLT1A,GALNT18,ROGDI,CIB2,PLAT,OTP,CELSR1,ESPN,ETS1,CARF,TMEM143,PLAU,BASP1,PALM,TMEM38A,CCDC160,TGM2,ENPP7,CHRNB1,SCARA3,KIRREL2,ADPRHL1,WNT5A,ACOT11,KRT79,COX6B2,PLA2G15,TMEM135,COL4A2,COL4A1,GPD1,TBC1D24,SCG5,ODF3B,SCG3,NUPR1,RELL2,EMID1,RTN2,NDRG4,NXPH4,SLC1A3,MRO,CACNA1C,NDRG2,PLCXD1,CPLX2,NDRG1,FBLN2,ADGRG1,HRH3,ALDH3B1,UAP1L1,TBC1D14,TAC4,CYC1,KIF3C,TAC1,ANKZF1,MFAP3L,ASIC1,PACSIN1,SYT5,PRNP,TGFB2,ACBD4,CAV2,ARHGEF39,EPHX2,HMGA1,HMGA2,DNAJC12,SSC5D,INHBB,MT3,SYT8,GNAO1,EFNA1,ISG20,ARHGAP32,GRHPR,BMP2,DAP,GNAL,BAMBI,BHLHE40,AMOTL2,MXD4,PHF19,GPSM1,DOCK4,THRA,PODXL2,HSPB8,SLC2A1,HSPB1,LAMC2,PITPNC1,DBP,ADGRE5,MCF2L,NAPRT,GDAP1L1,SULT4A1,ABCD1,HIST1H1C,KRT222,EGFL7,PLAUR,OLIG1,ETV1,SYNGR4,UPK3A,LSS,ETV5,CKAP4,SSTR5,ACTA2,ALDH1A3,VGF,IRF1,EHHADH,COL6A1,RBMS1,CDH16,FBP1,OTUB2,NIM1K,LAMA5,TUFT1,SLC3A1,ADD3,THBS1,AURKB,CLN6,DLL3,ASB16,DLL4,NWD1,GNG2,ERBB2,ATOH8,NT5DC3,SLIT1,NRIP3,HES1,SLIT2,PDLIM4,MAPK4,CHGA,QPCTL,BNIP3,TPBG,PDX1,ARID3A,MEIS2,MAPK12,MAPK11,FMNL2,SARDH,AQP11,SNTB1,ASB1","74","152.2","Sox9","false","false","Cluster 3","Clustered","8.155411655874191","0","ENSMUSG00000000567"
"111","","",,,"9430076C15Rik","false","false","Cluster 3","Clustered","8.192307692307692","0","ENSMUSG00000053007"
"2157","","",,,"Kcnf1","false","false","Cluster 3","Clustered","7.2727272727272725","0","ENSMUSG00000051726"
"1131","","",,,"Gmpr","false","false","Cluster 3","Clustered","7.644444444444445","0","ENSMUSG00000000253"
"2150","","",,,"Cbr1","false","false","Cluster 3","Clustered","7.822222222222222","0","ENSMUSG00000051483"
"1123","","",,,"Cyp3a11","false","false","Cluster 3","Clustered","8.318181818181818","0","ENSMUSG00000056035"
"1119","","",,,"Tgfbr3","false","false","Cluster 3","Clustered","8.010989010989011","0","ENSMUSG00000029287"
"2142","","",,,"Sstr5","false","false","Cluster 3","Clustered","7.418181818181818","0","ENSMUSG00000050824"
"2140","","",,,"Pgbd5","false","false","Cluster 3","Clustered","7.644444444444445","0","ENSMUSG00000050751"
"91","","",,,"Lpl","false","false","Cluster 3","Clustered","7.0","0","ENSMUSG00000015568"
"1115","","",,,"Acacb","false","false","Cluster 3","Clustered","7.912087912087912","0","ENSMUSG00000042010"
"90","Literature ChIP-seq,95;ARCHS4 Coexpression,732;ENCODE ChIP-seq,34;Enrichr Queries,485;ReMap ChIP-seq,72;GTEx Coexpression,654","MDC1,MT-ND5,MAML2,SCT,TRIL,ENO1,CWH43,SLC4A4,PTPDC1,ELK3,GLS,ZC3H12C,GJA1,CREB3L3,CREB3L4,NAMPT,EPSTI1,CYP1B1,NCKAP5,XYLB,IER3,HES7,TSPYL2,GABARAPL1,DNAAF3,CACNA2D1,SYTL1,HSPG2,DKK3,SYTL2,CLDN6,EID2,CLDN4,EML6,CLDN9,TEP1,MAP1B,RBP1,ACOT2,JTB,HOXB8,HPD,SLCO5A1,CFP,DYNC2LI1,LDHB,LDHA,CRACR2B,PRKAR2B,KCNQ1OT1,AGMO,ST3GAL4,HMOX1,RHBDL3,ST3GAL1,S100A11,SLC19A2,GSTM4,PLK4,PRELID2,NGFR,JUN,TIPARP,PLK2,FN1,ERLIN1,NFATC2,SLC16A10,NR1D1,NR0B2,FOSL1,ALS2CR12,COL1A2,SLC6A9,PKIA,FXYD2,PAM,BTG3,BTG2,KCNC1,PHF1,TCF23,LPCAT1,ADM,PYGL,HIF3A,PEAR1,ABCC12,TMEM189,FAM102A,TUBA1A,C1QTNF1,ADAMTSL4,TIMP2,TIMP3,TCP11L2,TK1,LYPLA1,ARG2,ANXA1,CNOT6L,DUSP3,TPI1,ANXA3,IFNGR1,PGAM1,MYOF,ROM1,ANXA5,SLC39A13,SERPINB9,WNT9A,F2,TMEM173,WDR35,PLCB3,TUBB2A,INF2,OAF,PLSCR4,PXDN,DPYD,CDC42EP3,PLEKHO2,GAS6,PAFAH1B3,VAMP2,RAPGEF4,KANK1,RNASEL,ASAH2,PLPPR2,FAM129A,DLST,SNX32,ABRACL,SNX33,PTGS2,TMEM163,FAM129B,TMEM71,FGD3,ALOX5,PLAGL1,FLNA,CKB,FLNC,CENPU,GSN,ANKIB1,KCNB1,GLYCTK,MOCOS,BMP8B,DHRS3,TTLL7,SPSB2,SPSB1,SNX16,CLCF1,LPCAT3,FOSB,COQ8A,HSPA1B,NUCB2,OLFML2B,CSF1,CHPF,GPR68,RAB3D,FAM13A,LY75,CLU,LCLAT1,TNF,SLC8A1,MFSD13A,EFEMP2,TUBB6,HPGDS,EFEMP1,SLCO2B1,SCMH1,TNFRSF8,NEK1,SLC25A45,SLC16A3,FADS1,SLC16A5,KCNH2,PPP1R16B,MYLIP,PCYT2,IGFBP5,ZBTB38,F2R,MAGI2,IGFBP2,VRK2,NEAT1,CDC25C,ACAP3,RAB30,S100A6,S100A5,SQSTM1,PHLDB2,KANK3,SHC4,PFKFB3,INSIG1,ABHD8,LY96,GMPR,HMMR,TNFRSF11A,RAP1GAP,MTM1,SNN,IGFBP7,TMEM120B,SDF2L1,RBPMS,BTN2A2,ZBTB10,HPS4,FBXO32,ADAP1,KY,CXCL10,MFHAS1,PTPRB,BFSP1,PTPRC,GGCX,LHX1,MDM2,CSPG5,ESAM,MAFK,RNF183,PLEKHM3,ARHGAP11A,PIWIL4,PSCA,ITGB5,NRARP,PTPN22,DUSP18,NXT2,DUSP10,LBH,SCRN1,ACP6,BOC,UPP1,ME2,SLC36A1,PLEKHG1,PLA2G12A,SGIP1,TNFRSF18,VPS37B,KCNAB3,ADRA2A,ARL4C,DUSP22,ASPM,PKM,LCK,BIRC5,ITGA5,DSG3,ST6GALNAC4,GAPDH,ST6GALNAC6,ITIH5,CEBPA,PLEKHH2,SLC5A11,CXXC5,AP3M2,ABLIM1,SRR,DCAF17,P2RY2,NHS,E2F2,TRIM47,IARS2,D2HGDH,IGF2BP2,RBBP7,ACSS1,ALOXE3,CACNG4,SEC11C,JAZF1,SLC12A4,MARCKSL1,SMOX,MACC1,AHNAK2,LYSMD2,SYT13,MCOLN2,PTPN14,KBTBD11,TTC39A,KLF7,P2RX4,SYT12,SYT11,DNAJA4,OCIAD2,NECTIN4,PFKP,SPARC,FAM89A,ICAM1,LGALS3,FRAT2,CHEK2,LONP1,SOX9,PDK1,KCNK10,IL1R1,ENTPD8,ADGRA3,TM4SF5,CMBL,ACSL3,KNL1,MYO7A,MIF,TIAM2,PPP1R3C,IFI27,PPP1R3B,MALL,KCTD14,RIN3,KCTD12,PLPP3,STX1A,PLA1A,PTGES,NUMBL,EPAS1,PDE1B,TSHZ2,MTTP,PIK3R3,APCDD1,GSPT2,SLAMF9,TSPAN4,SARAF,HIVEP3,SNX9,ST8SIA6,TSPAN2,KCNN4,SLC35E4,PYCR1,DCLK2,RAB27A,IFFO2,RASSF9,NBEAL2,FER1L6,GADD45G,CCDC88B,AKR1B10,ID4,KYAT1,CD200,ITM2C,FKBP11,CD40,TMEM151B,GBE1,ZFAND2A,CITED4,PTPRM,KRT23,SLC7A11,PTPRH,PCSK5,HERPUD1,SERP2,GYS1,GLIPR1,SH3PXD2A,CTSL,HNF4A,CTSK,STBD1,ACADS,LMCD1,CD53,ZCCHC24,EDN1,TMEM150A,TNFRSF12A,IL15,IZUMO1,ANO8,ANO6,TUBG2,CBFA2T3,SYN1,RAD51B,UGDH,ALDOA,TLR4,FJX1,DBN1,SDCCAG8,TLR2,TMPRSS9,SLC43A3,HAAO,AMIGO2,AKR1D1,CXCR4,VWCE,RASIP1,GNAI1,STX11,CAMK2N1,GPC1,MPZL2,PLEKHA2,CRYBB1,VEGFC,ETNPPL,KBTBD3,SH3RF2,KRT18,HIST3H2A,CSDC2,APBA1,ESYT1,MAD2L1,SCARB1,SAMD9L,CD83,CD80,NDUFA10,BUB1B,PLAT,JADE2,GXYLT2,NR3C1,ETS1,TMEM143,PLAU,BASP1,CCRL2,CAPN2,COTL1,SACS,DENND5A,TMEM38A,SBF2,PPFIA4,PDE8A,TGM2,ZBP1,POSTN,GAS2L3,CD93,ARID5A,KRT79,SHISA4,CYBB,ANXA10,PDGFRL,TANC2,PDIA5,ERN1,COL4A1,MAP7D1,SELENOP,RELL2,NUPR1,SCG2,CARD11,ABCG1,RTN2,NDRG4,TBC1D19,AKNA,ALOX15,ARHGAP19,ARHGAP18,PLD1,HIGD1A,PLCXD1,FUT1,NDRG1,RASGRP3,ADGRG1,NPC1L1,H1FX,TAC1,PACSIN1,SYT5,PRNP,ACBD4,CAV2,HMGA1,CRIM1,SSC5D,MT3,COQ5,ARHGAP23,ISG20,SLC2A9,AHI1,SEPSECS,BMP2,DAP,NR4A3,UBXN11,ATG16L2,DLG4,BHLHE40,NABP1,CRYL1,AMOTL2,DNAL1,LRP11,PNLIPRP1,HSPB8,PLEK,SLC2A1,HMGB2,ATP2A3,HSPB1,SLC2A5,HK2,TTC28,CASP7,ADGRE5,ALDH2,CASP1,IFT57,CFAP45,HIST1H1C,EGFL7,CAMK1D,ARHGEF15,PLAUR,ETV1,IQCD,SSTR1,MASTL,SYNGR4,CKAP4,SHROOM4,TAPBP,GIP,VGF,DDAH2,IRF1,ZPBP2,COL6A1,RBMS1,CDH13,CDHR5,LAMA5,RGS17,DCTN2,TUFT1,RGS13,LAMA3,RSPH9,ATP1A1,TFPI,THBS1,AURKB,AGPAT4,DLL4,GNG2,NT5DC3,MXI1,NRIP3,HES1,LRIG3,PLA2G2D,CMTM3,LIMK1,ARID3A,CCK,PIK3IP1,COL7A1,FAM131A,AQP11,ASB1","277","345.3","Jun","false","false","Cluster 3","Clustered","7.284324324324324","0","ENSMUSG00000052684"
"1110","","",,,"Pomc","false","false","Cluster 3","Clustered","7.822222222222222","0","ENSMUSG00000020660"
"1108","","",,,"Tuba1a","false","false","Cluster 3","Clustered","8.235294117647058","0","ENSMUSG00000072235"
"1107","","",,,"Chpt1","false","false","Cluster 3","Clustered","6.88235294117647","0","ENSMUSG00000060002"
"1105","","",,,"Fut2","false","false","Cluster 3","Clustered","8.318181818181818","0","ENSMUSG00000055978"
"2129","","",,,"Rasd1","false","false","Cluster 3","Clustered","8.307692307692308","0","ENSMUSG00000049892"
"80","Literature ChIP-seq,91;ARCHS4 Coexpression,43;Enrichr Queries,371;GTEx Coexpression,62","IFITM1,SPARC,SCT,STMN3,AQP4,MYLK,SYNPR,GJA1,CHEK2,DPYSL3,SOX9,SCN1B,EPHA4,GABARAPL1,UNC5A,RBFOX3,DAPK2,PRKCA,CPT1C,MAPK8IP2,HPCAL4,MTURN,MAPK8IP1,MAP1B,MAP1A,VDAC1,PLPP3,CTXN1,TSPYL4,BEX4,BEX2,TTYH1,EPAS1,STXBP1,TTBK1,MAP6,B4GALNT1,SCN3A,SPTBN2,RAB11FIP5,FZD1,CDK18,JUN,DTNA,CADM4,MAGEE1,ST8SIA3,FN1,DCLK3,DCLK2,ABCA7,NR1D1,COL9A3,ITM2C,SCN2B,BTG2,TMEM151B,CCDC120,KCNC1,NCAN,DIRAS1,PHF1,DIRAS2,SLC35F1,HERPUD1,JPH4,SERP2,TUBA1A,CAMKV,SH3PXD2A,SLC22A17,TIMP2,IDS,TIMP3,KIF1A,PSD,ZCCHC24,PCYT1B,ITPK1,TMC8,SYP,SYN2,SYN1,GPRC5B,TUBB2A,PXDN,TFF3,ARHGEF4,MAPT,PPARA,GAS6,SYNC,MGLL,VAMP2,RAPGEF4,NAPB,SEZ6,SNX32,CRIP2,PHYHIP,RXRA,CAMK2N1,CARNS1,RPRML,CKB,APBB1,GABRD,CGREF1,ARNT2,GSN,TUBB4A,POU4F1,DHRS3,GRIN1,ETNPPL,SULF2,ABI2,MORN4,FKBP1B,PCDHB16,APBA1,IRS1,RORA,NR3C1,CELSR1,CLU,RIMS4,PALM,ADORA1,SH2D5,PPFIA4,FADS1,RGS7,TGM2,PPP1R16B,ZBP1,KCNH3,IGFBP5,MAGI2,TMOD2,APLP1,RUNDC3A,CLIP3,OLFM1,ACAP3,SQSTM1,BRSK1,BRSK2,NDRG4,ARHGEF25,ARL3,HPCA,ITPR1,SLC1A3,CACNA1A,LPL,NREP,NDRG2,CPLX2,NDRG1,RAP1GAP,PDZD4,SNN,ADGRG1,HRH3,NACC2,TNFRSF14,NPTX1,KIF3C,CYC1,RAB6B,PLXNA4,PACSIN1,ASIC1,KCNF1,PRNP,CBX6,TGFB2,CORO2B,MT3,GNAO1,GNAL,DLG4,P4HA2,REEP2,BHLHE40,CPE,CSPG5,MXD4,CELF3,SLC2A1,HSPB1,ARRB1,PKD1,SYNE1,MCF2L,SULT4A1,TRIM62,PIANP,APOA1,FAM219A,DNM1,TGFBR3,PTP4A3,PKM,IRF1,CRY2,COL6A1,BMP2K,GAPDH,CAMK2B,NIM1K,LRP3,ADD3,CXXC5,THBS1,AURKB,DLL3,DDN,ABLIM1,SV2A,SPOCK2,MXI1,FYN,CRYM,STOX1,MAPK4,CACNG4,SLC12A4,KCNIP3,FBXL16,EFR3B,MEIS2,KBTBD11,MAPK12,MAPK11,NFASC,PIK3IP1,SYT11","63","141.8","Thra","false","false","Cluster 3","Clustered","7.473684210526316","0","ENSMUSG00000058756"
"78","Literature ChIP-seq,59;ARCHS4 Coexpression,41;Enrichr Queries,44;GTEx Coexpression,11","IL1RN,VIPR1,PANK1,SCT,SLC23A1,AQP8,AQP9,DIXDC1,ACSM5,ABAT,CLDN1,MYLK,LGALS3,CREB3L3,CHEK2,MYB,KIF21A,SOX9,SKP2,XYLB,HABP2,MFSD2A,HES7,PAQR9,SLC6A19,DAPK2,SERPINF2,ENTPD8,ACSL5,TM4SF5,PRKCA,SLC51A,TM4SF4,CMBL,PRAP1,CYP27A1,ACE2,RBP4,POR,RBP2,TFR2,SOAT2,LGALS12,SUCLG2,RIN3,CYP2E1,HPD,CFTR,STX1A,PTGES,CDS1,MACF1,ENPEP,MAOB,EPAS1,MAOA,SHMT1,SLC22A1,MTTP,CFI,GATA4,LPAR3,SLC5A1,SLC30A10,ADH4,HSD11B2,NEU3,AGMO,TTPA,RDH16,HIVEP3,PPARGC1A,ST3GAL1,PPARGC1B,ZBTB7C,GSTM3,CDK18,JUN,GSTM2,DTNA,ABCA5,NEBL,REG4,FN1,ERLIN1,SLC16A12,CIDEB,A1CF,NR0B2,BRI3BP,CIDEC,GJB1,VNN1,NCEH1,CYP1A1,MESP2,PIGR,COL18A1,DHRS11,ACY1,MOGAT2,NCAN,HNF4G,PRKAG2,GPT,PYGL,PTPRH,PRSS22,KHK,C1QTNF1,SLC22A15,SH3PXD2A,ADAMTSL4,HNF4A,ANXA6,DLAT,ACADS,LMCD1,CNOT6L,MME,ELOVL2,DENND2A,MYOF,ANO9,COPZ2,ELOVL6,PROX1,F2,SLC39A14,GCHFR,RAD51B,TMEM37,DEPDC7,NR5A2,BDH1,CLDN15,PXDN,DPYD,KIT,ALDOB,PPARA,PLCB1,PDZRN3,MGLL,RAPGEF4,OAT,PHLPP1,SLC43A3,NR1I3,HAAO,ATL1,PVT1,AKR1D1,AFM,CXCR4,HSD17B6,PTGS2,PAPSS2,RXRA,SLC17A9,TM4SF20,XDH,BCHE,PKLR,F10,GLYCTK,GSR,GUCA2B,FMO4,FMO5,GUCA2A,SULF2,FABP1,ALDH4A1,KRT18,CFHR2,AADAC,TMEM56,CLCF1,GSTA1,SLC28A1,FOXA3,OTC,FOXA1,KLB,ALDH1L1,EXOC3L4,GOLT1A,IRS1,CPOX,RORA,NR3C1,CELSR1,ETS1,SYDE2,GRB14,IYD,CHP2,SLC25A45,ENPP7,PLS1,SPINK4,ABCG5,SLC15A1,G6PC,DGAT1,DIO1,ACOT12,PIPOX,SDHC,NPNT,MUC3A,MID1,GPRIN3,GLTPD2,SLC9A3,HIC2,ACAP3,MYCN,SMO,GPD1,SELENOP,IGFALS,SLC27A2,AJUBA,SLC27A5,ABCG2,AKNA,PROZ,ITPR1,LPL,PDZD3,ADGRG7,NLRP6,NPC1L1,ASIC1,PRNP,MGAM,BTN2A2,VDR,EPHX2,INHBC,BMP6,ARHGAP24,SEPSECS,MLXIPL,CXCL10,DAO,CPS1,PQLC1,BHLHE40,FAM187B,REEP6,KCNK5,MOXD1,THRB,LEAP2,LECT2,SLC2A2,CXCL1,SLC2A5,PITPNC1,TMEM220,DUSP10,ACP6,SLC37A4,SLC13A2,PLA2G12B,CAMK1D,SGIP1,ITGA2,APOA1,VPS37B,KLF15,PRODH2,PARD3B,PTP4A3,MEP1A,EHHADH,CAT,ALDH1A1,ASPG,CDHR5,ANG,FBP1,DTL,SLC25A13,CEBPA,SLC47A1,LEF1,LAMA3,SLC3A1,HSD17B13,AURKB,NCALD,ABLIM1,GNA11,ATOH8,MAL2,RFFL,JAZF1,APOC3,SEMA4G,TM6SF2,MAPK13,P2RX4,FRAS1,SYT12,MYO1A,XPNPEP2,GLOD5,SARDH,NAGS,PPP1R14D,NECTIN3","11","38.75","Nr1i2","false","false","Cluster 3","Clustered","8.345345345345347","0","ENSMUSG00000022809"
"1101","","",,,"Sorl1","false","false","Cluster 3","Clustered","8.318181818181818","0","ENSMUSG00000049313"
"75","ARCHS4 Coexpression,243;Enrichr Queries,54;GTEx Coexpression,289","DIXDC1,ABAT,SLC4A4,MYLK,GJA1,CHEK2,CYP1B1,SOX9,CCDC92,SCN1B,EPHA4,PAQR7,RBFOX3,LIMCH1,DAPK1,CACNA2D1,PRKCA,MAPK8IP2,HPCAL4,MTURN,LGALS12,MAP1A,KCNQ4,PLPP3,PFN2,EPAS1,STXBP1,EIF5A2,INPP5A,PGBD5,PRKAR2B,PDGFC,PPARGC1A,JUN,DTNA,PLK2,FN1,FZD9,RAB27B,PEX5L,ID4,MRVI1,ZBTB8B,FERMT2,SCN2B,DIRAS2,PTPRM,SLC7A11,ROBO1,TIMP3,IDS,DLGAP4,DUSP3,MME,BGN,TMEM40,ANO6,SYP,SYN2,SYN1,ENAH,PLCB4,MMP16,RILPL1,KCNMA1,PXDN,KIT,PPARA,PLCB1,PDZRN3,MGLL,VAMP2,MATN2,RAPGEF4,KANK1,NAPB,TAGLN,FAXC,PELI3,PRUNE2,FAM129A,SEZ6,PTGS2,PHYHIP,GNAI1,MFSD4A,CAMK2N1,FLNA,TAF9B,RUNX1T1,GABBR2,EGLN3,KCNB1,KCNB2,SORBS2,FMO4,GRIN1,TTLL7,OSTM1,PCDHB16,MSRB3,IRS1,RORA,FRY,NR3C1,CELSR1,ETS1,CLU,SLC8A1,RGS4,RIMS2,RGS5,DEPTOR,CDH2,SACS,SLC25A45,FADS1,SEMA6A,IGFBP5,SEMA6D,MAGI2,TMOD2,TTC7B,MITF,RUNDC3A,OLFM1,SELENOM,DMWD,SELENOP,TNIK,PARM1,ARHGEF25,RNF180,PLD5,ITPR1,CACNA1A,LPL,SLC1A3,CACNA1C,CPLX2,NDRG1,NEUROD2,CALD1,MYH10,RAB6B,MFAP3L,PACSIN1,PRNP,CBX6,TGFB2,BDNF,VDR,CRIM1,FBXO32,GNAO1,CXCL10,ARHGAP32,FGF14,NBEA,UBXN11,RCAN2,BHLHE40,TUBA8,SNAP25,TRIM72,RNF11,CELF2,FHL1,SOBP,SYNE1,SGCB,SULT4A1,KLF12,PLA2G12A,SGIP1,KSR2,DNM1,ACTA2,TGFBR3,PTP4A3,GFOD1,ALDH1A1,CDH13,PDE5A,SHANK2,CAMK2B,SEC23A,PRKAA2,SEMA3C,THBS1,NCALD,THSD4,AURKB,DDN,ABLIM1,ALDH1B1,POLD1,RAB23,SLIT1,SLIT2,SORL1,MEIS2,SUGCT,FAM131A,SNTB1","97","195.3","Thrb","false","false","Cluster 3","Clustered","7.210526315789474","0","ENSMUSG00000021779"
"2123","","",,,"Upk1b","false","false","Cluster 3","Clustered","7.5636363636363635","0","ENSMUSG00000049436"
"1098","","",,,"Xkr7","false","false","Cluster 3","Clustered","7.418181818181818","0","ENSMUSG00000042631"
"1096","","",,,"Abcc8","false","false","Cluster 3","Clustered","7.644444444444445","0","ENSMUSG00000040136"
"1095","","",,,"Etfbkmt","false","false","Cluster 3","Clustered","7.542857142857143","0","ENSMUSG00000039958"
"1091","","",,,"Myo5a","false","false","Cluster 3","Clustered","8.318181818181818","0","ENSMUSG00000034593"
"1089","","",,,"Gsr","false","false","Cluster 3","Clustered","7.973856209150327","0","ENSMUSG00000031584"
"1085","","",,,"Apbb1ip","false","false","Cluster 3","Clustered","8.076923076923077","0","ENSMUSG00000026786"
"2109","","",,,"Fgfbp1","false","false","Cluster 3","Clustered","8.318181818181818","0","ENSMUSG00000048373"
"1084","","",,,"Slamf9","false","false","Cluster 3","Clustered","7.151515151515151","0","ENSMUSG00000026548"
"1082","","",,,"Acat2","false","false","Cluster 3","Clustered","7.151515151515151","0","ENSMUSG00000023832"
"1081","","",,,"Rnf180","false","false","Cluster 3","Clustered","8.181818181818182","0","ENSMUSG00000021720"
"2104","","",,,"Nwd1","false","false","Cluster 3","Clustered","7.7142857142857135","0","ENSMUSG00000048148"
"2103","","",,,"Tenm4","false","false","Cluster 3","Clustered","8.318181818181818","0","ENSMUSG00000048078"
"2101","","",,,"Tmem229a","false","false","Cluster 3","Clustered","7.418181818181818","0","ENSMUSG00000048022"
"1074","ARCHS4 Coexpression,44;Enrichr Queries,98;ReMap ChIP-seq,258;GTEx Coexpression,201","SPARC,FAM89B,STMN3,LDLRAD3,AQP4,ABAT,SOGA1,TSKU,MYLK,SAMD14,GJA1,RINL,CREB3L4,CHEK2,DPYSL3,LONP1,KIF21A,SOX9,HOXA5,HOXA4,IER3,HES7,TMEM88B,EPHA4,EPHA7,RBFOX3,LIMCH1,CACNA2D1,SYTL1,MFSD11,HPCAL4,MTURN,MAPK8IP1,CLDN6,HOXB9,CLDN9,MAP1B,MAP1A,JTB,VDAC1,MXRA7,KCTD12,ATP6V0D1,HOXB8,PLPP3,PFN2,LIPT1,EPAS1,MAGED1,STXBP1,PIK3R3,CRACR2B,PCBP4,MAP2,PDGFC,TSPAN4,HMOX1,B4GALNT1,ST3GAL1,PPARGC1A,DECR1,CDK17,FZD1,JUN,FZD3,CARMIL3,DTNA,CADM4,SPHKAP,PLK2,FN1,FZD9,PYCR1,DCLK2,NR1D1,L1CAM,AIF1L,FOSL1,PKIB,XKR7,KLHDC8A,ID4,LRRN1,SERPINI1,ITM2C,TMEM151B,KCNC1,ACY1,NCAN,DIRAS2,GPT,SLC35F1,SLC7A11,PRSS22,ROBO1,SHF,JPH4,GYS1,TUBA1B,MMP24,PCLO,SLC22A17,TRIM3,DNER,TIMP2,RAC3,TIMP3,FFAR2,KIF1A,PSD,ZCCHC24,CD53,TNFRSF12A,MME,ELOVL2,ROM1,ANO8,PAX6,ELOVL6,MANEAL,PROX1,SYP,RENBP,SYN1,PLCB3,GPRC5B,PLCB4,CLDN15,MMP16,MMP15,PXDN,KIT,KCNMA1,MAPT,ALDOA,PLCB1,VAMP2,MGLL,CD63,NAPB,PHLPP1,KCNA1,SLC43A1,PRUNE2,CXCR4,SNX33,PTGS2,CRIP1,PHYHIP,GNAI1,FAM129B,CARNS1,CKB,APBB1,GABRD,RUNX1T1,PURG,LRRC26,BCHE,ARNT2,KLHL3,SORBS2,NMNAT2,TUBB4A,STXBP5L,SULF2,ABI2,CLCF1,PCDHB16,FOSB,ESYT1,CD68,SPC24,SCARB1,ANKRD13D,CHPF,NAB2,RORA,JADE2,NR3C1,CELSR1,ETS1,CLU,CELSR3,SLC8A1,TGM1,RGS4,EFEMP2,FGF9,SALL2,CDH2,KIF5C,BASP1,SLC25A45,PPFIA4,SLC16A3,SLC16A5,TGM2,TLE2,PCYT2,SEMA6A,IGFBP5,SEMA6D,WNT5A,TMOD2,APLP1,NEAT1,MYT1,DISP2,PLA2G15,CLIP3,ACAP3,RAB37,COL4A1,MADD,SELENOP,ANKS6,SCG3,SQSTM1,SLC27A5,RTN2,BRSK1,NDRG4,BRSK2,PFKFB3,RNF180,CACNA1B,ABHD8,CACNA1A,SLC1A3,NREP,CPLX2,HIGD1A,NDRG2,CAMSAP2,NEUROD1,SLC9A3R2,IGSF21,NEUROD2,CALD1,NACC2,UAP1L1,PMVK,NPTX1,CYC1,KIF3C,RAB6B,FDPS,PRNP,TGFB2,SDF2L1,BDNF,CRIM1,HMGA2,SSC5D,TOR1B,CORO2B,GNAO1,CXCL10,DAB1,DLG4,BAMBI,BHLHE40,REEP2,SP6,CPE,CSPG5,MAFK,REEP6,MAP3K12,SNAP25,DOCK4,ITGB5,THRA,MTCL1,RASGRF1,SLC2A1,YBX2,SLC2A4,PKD1,SYNE1,UNC80,GRM4,DBP,DUSP10,SCRN1,SGCB,MCF2L,ARFGEF3,TRIM67,PIANP,TNFRSF19,ETV1,OLIG1,IQCD,KCNAB3,ETV4,ETV5,DNM1,SSTR5,ARL4C,CCNA2,PTP4A3,VGF,IRF1,PDE5A,GAPDH,CAMK2B,ACSS2,SEMA3C,LAMA4,TFPI,THBS1,AURKB,MROH1,AP3M2,ABLIM1,GNG2,SH3BP1,SV2A,SPOCK2,ERBB2,E2F2,TRIM47,HES1,FYN,SLIT2,ALOXE3,MARCKSL1,PCDHGC4,ARID3A,FBXL16,MEIS2,MAPK12,BAIAP3,NFASC,FMNL2,SYT11","71","150.3","Etv1","false","false","Cluster 3","Clustered","8.03921568627451","0","ENSMUSG00000004151"
"2098","","",,,"Gpr157","false","false","Cluster 3","Clustered","8.307692307692308","0","ENSMUSG00000047875"
"2095","","",,,"Diras2","false","false","Cluster 3","Clustered","7.151515151515151","0","ENSMUSG00000047842"
"2094","","",,,"Ccdc88b","false","false","Cluster 3","Clustered","8.192307692307692","0","ENSMUSG00000047810"
"2091","","",,,"Fcgbp","false","false","Cluster 3","Clustered","7.644444444444445","0","ENSMUSG00000047730"
"2090","","",,,"BC025446","false","false","Cluster 3","Clustered","7.466666666666667","0","ENSMUSG00000047728"
"1061","","",,,"Gda","false","false","Cluster 3","Clustered","8.161764705882353","0","ENSMUSG00000058624"
"72","ARCHS4 Coexpression,152;Enrichr Queries,38;ReMap ChIP-seq,110;GTEx Coexpression,114","MT-ND5,PANK1,SLC23A1,ACSM5,ABAT,CLDN1,SLC4A4,ELK3,LGALS3,SYNPR,SPATA24,RASSF6,DPYSL3,SOX9,NCKAP5,XYLB,HABP2,HOXA5,HOXA4,HES7,EPHA4,GABARAPL1,EPHA7,PAQR4,LIMCH1,SERPINF2,ACSL5,TM4SF4,HOGA1,CYP27A1,CLDN6,RBP4,CLDN4,HOXB9,TFR2,CLDN9,MAP1B,MALL,LGALS12,HOXB4,HOXB3,CYP2E1,KCTD12,HOXB8,PLPP3,HPD,EPAS1,CFI,SLC22A1,TSHZ2,SLC30A10,APCDD1,PCDH19,ADH4,INPP5A,AGMO,TTPA,ADAMTS17,RDH16,HIVEP3,S100A14,PPARGC1A,S100A11,ZBTB7C,MYH7B,JUN,WNT10A,GSDMA,ABCA5,NEBL,SLC33A1,NFATC3,FN1,IGF2,FZD9,RAB39B,PTK6,RASSF9,NR1D1,NR0B2,A1CF,ST18,GADD45G,FOSL1,TPX2,GJB1,COL1A2,FXYD3,FXYD2,ID4,KYAT1,FAT4,ITM2C,CDKN1C,NRP2,ECM1,BTG2,TENM4,TCF23,ADM,RCSD1,KHK,ROBO1,SERP2,C1QTNF1,SH3PXD2A,HNF4A,TIMP3,ANXA1,TNFRSF12A,ACTL6B,ANXA3,MYOF,GFRA1,PAX6,PROX1,F2,SLC39A14,GCHFR,BACE2,DEPDC7,NR5A2,KCNMA1,PXDN,KIT,TFF3,RGN,TFF2,PLCB1,DNASE1L3,PDZRN3,VAMP2,CD63,NR1I3,HAAO,TMPRSS3,AKR1D1,AFM,CXCR4,HSD17B6,AFP,PTGS2,PHYHIP,GRAMD4,TMEM163,FAM129B,CAMK2N1,PLAGL1,REM2,MPZL2,RUNX1T1,GSN,PKLR,F10,BIK,GLYCTK,GUCA2B,SORBS2,FMO4,FMO5,GUCA2A,AGT,SULF2,SH3RF2,KRT18,CFHR2,AADAC,TMEM56,CLCF1,QPCT,KIF26B,PCDHB16,ESYT1,SLC28A1,LGR5,OTC,KLB,STEAP3,EXOC3L4,GOLT1A,GDA,IRS1,LOXL4,RORA,JADE2,CELSR1,CLU,ETS1,SLC8A1,HID1,CAPN8,DACH1,GRB14,FGF9,CDH2,CAPN2,PLXNC1,SLC25A45,SLC16A5,ABCG5,G6PC,SEMA6A,IGFBP5,FST,SEMA6D,SPNS2,WNT5A,IGFBP2,DIO1,MAGI2,ACOT12,PIPOX,NEAT1,COX6B2,NPNT,GLTPD2,COL4A1,TMEM139,SELENOP,S100A6,SCG5,S100A5,SCG3,IGFALS,TNIK,SLC27A2,AJUBA,PHLDB2,SCG2,SLC27A5,PARM1,PROZ,CACNA1A,LPL,FUT2,NDRG1,NPAS2,ACAT1,ADGRG1,NPC1L1,PLXNA4,PRNP,TGFB2,ACBD4,BDNF,EPHX2,EVX1,FBXO32,ADAP1,INHBC,MT3,TDRD1,REEP1,GRHPR,MLXIPL,PTPRE,ARHGAP32,CXCL10,EFNA3,BMP2,PLCXD3,BFSP1,NR4A3,FGF14,DAB1,GGCX,CPS1,NBEA,BAMBI,BHLHE40,SP5,CPE,FGFR4,PHF19,ABCD4,PIWIL4,LEAP2,CELF2,LECT2,SLC2A1,SLC2A2,HSPB1,LAMC2,PTPN22,TMEM220,SYNE1,NADK2,DBP,GAL3ST2,LBR,PLEKHG3,PLA2G12B,PEG3,LIX1L,URAD,PLAUR,APOA1,ETV1,IQCD,VPS37B,SSTR1,PRODH2,ETV5,ARL4C,TGFBR3,PTP4A3,PKM,RASA3,VGF,SETBP1,EHHADH,IRF1,ITGA7,CDH13,RBM20,ANG,SHANK2,SLC25A13,LAMA5,HLF,LRP1,SEMA3C,TUFT1,RGS16,LEF1,HSD17B13,ATP1A1,ADD3,CXXC5,THBS1,AURKB,NCALD,ABLIM1,SLIT1,IGF2BP3,SLIT2,ALOXE3,PDLIM4,MACC1,APOC3,MBOAT2,SEMA4G,TTC39C,SORL1,SGPP2,MEIS2,KLF7,RSPH1,NFASC,SARDH,TRIM35,ASB4,NAGS,INSM1,SNTB1","37","103.5","Prox1","false","false","","Unclustered","2.0","0","ENSMUSG00000010175"
"73","ARCHS4 Coexpression,388;Enrichr Queries,427;GTEx Coexpression,833","IL1RN,IFITM1,NRROS,CD83,ANKRD13D,CSF1,LY75,RORA,IFI30,CELSR1,MKI67,ETS1,TNF,IFIT3,ICAM1,ZC3H12D,LGALS3,RINL,IL18RAP,RASSF5,MYB,TNFSF10,LONP1,CYP1B1,IER3,ZBP1,PPP1R16B,PRKCH,RSAD2,F2R,CYBB,SYTL3,DOK3,MFNG,RIN3,ADAM8,CARD11,AKNA,NDRG1,CD79B,DPP7,HIVEP3,NFE2,JUN,CARMIL2,FAM78A,NFATC2,RAB27A,MSN,CIDEB,NBEAL2,ISG20,CCDC88B,SEPSECS,CXCL10,PTPRC,NR4A3,BHLHE40,ITM2C,ARHGAP9,DENND1C,BTG2,ITGAM,SH3KBP1,PLEK,CITED4,ATP2A3,SLC2A1,PTPN22,SLC7A11,ITGAL,RCSD1,LIMD2,LMNB1,PSTPIP1,ADGRE5,CD38,ITGB7,UPP1,EMB,CD53,SUN2,ANXA1,IL15,PLAUR,TMC8,TMEM173,CBFA2T3,VAV1,PARP8,ARL4C,TGFBR3,FGR,APBB1IP,HSH2D,PTP4A3,LCK,IRF1,PXDN,KIT,CAT,BIRC5,ST6GALNAC4,TLR2,ARHGEF6,CEBPA,RGS16,LEF1,FAM129A,CXCR4,NLRC3,PTGS2,THBS1,GRAMD4,AURKB,FAM117A,TMEM71,FGD3,SLC17A9,SH3BP1,POLD1,P2RY2,E2F2,IL12RB1,ATOH1,MARCKSL1,ARID3A,SORL1,MCOLN2,PSMB9,XK,STK17B,FOSB,INSM1,CD244","592","549.3","Gfi1","false","false","","Unclustered","1.6666666666666667","0","ENSMUSG00000029275"
"84","","",,,"Ncor1","false","false","","Unclustered","6.065934065934066","0","ENSMUSG00000018501"
"88","","",,,"Isg20","false","false","","Unclustered","6.805555555555555","0","ENSMUSG00000039236"
"93","","",,,"Pld1","false","false","","Unclustered","6.222222222222221","0","ENSMUSG00000027695"
"95","Literature ChIP-seq,123;ARCHS4 Coexpression,30;Enrichr Queries,313;ReMap ChIP-seq,289;GTEx Coexpression,128","MT-ND5,ENO1,MRGPRE,GLS,SMC2,SAMD14,GJA1,EVA1B,CREB3L4,DPYSL3,MYB,PLCE1,CYP1B1,CHGB,TRIQK,PRKCH,RBFOX3,ISL1,RNASE1,CLDN6,GPR162,RFX6,CLDN9,MAP1B,LGALS12,HOXB4,JTB,HOXB3,FICD,PLA2G5,SLC5A3,CRACR2B,RDH10,NKX2-2,JAG2,NFE2,JUN,WNT10A,ABCA5,PLK2,FZD7,EDEM2,FN1,FZD9,SLC16A12,ABCA7,L1CAM,A1CF,ST18,FOSL1,PKIB,XKR7,FXYD2,PAM,LGMN,CDKN1C,BTG2,KCNC1,LPCAT1,GPT,SHF,CASP14,TUBA1B,MMP24,TUBA1A,TRIM3,NEFL,TIMP3,GAST,NEFM,EDARADD,HELLS,TPI1,ANXA1,ACTL6B,SLC2A13,MYOF,ELMOD3,SLC39A13,PAX6,F2,SIRT3,MMP11,TMEM37,PLCB3,SLC7A8,ANGPTL6,MMP15,PXDN,KCNMA1,SAMD5,KCNA1,SEZ6,HOXD13,PTGS2,PAPSS2,PLAGL1,FLNA,GCNT4,P4HTM,RUNX1T1,EGLN1,CDKN2B,KCNB2,NMNAT2,TUBB4A,POU4F1,DHRS3,STXBP5L,DCBLD2,AGMAT,SPSB2,SLCO3A1,RIMBP2,YPEL3,RAB3C,TUSC3,GUCA1A,RORA,CLU,LCLAT1,SLC8A1,RIMS2,EFEMP2,DACH1,FGF9,SALL2,CDH2,FCGRT,NEK1,SLC25A45,SEMA6B,TLE2,SLC15A1,SEMA6A,IGFBP5,ZBTB38,SEMA6D,F2R,MITF,NEAT1,MYT1,DISP2,ARMCX3,ACAP3,OLFM1,RAB37,DMWD,MADD,SLC9A9,IGFALS,AJUBA,SQSTM1,PHLDB2,BRSK1,BRSK2,PARM1,KHDRBS3,GPR119,ARL3,NREP,HMMR,NEUROD1,IGSF21,NEUROD2,NPTX1,BDNF,MFHAS1,PTPRB,MAP3K15,P4HA1,GGCX,NBEA,LHX1,REEP2,NFE2L3,CPE,CNIH2,SNAP25,MTCL1,RASGRF1,LECT2,SYNE1,UNC80,LBH,SCRN1,SGCB,IDH3B,WDR6,CNGA4,SLC37A4,TRIM67,ADGRV1,GPX7,KCNAB3,BET1L,DNAJC3,PTP4A3,PKM,SPACA6,GAPDH,SLC47A1,SLC5A10,CXXC4,ABLIM1,SLC25A29,E2F2,RBBP7,RFFL,SLC36A4,SEC11C,PRRX1,CTNS,SYT14,FBXL16,SYT13,MBOAT4,TTC39A,NFASC,SYT11,ASXL3,SPAG1,INSM1,NECTIN3,UNC79,CPNE8,SPARC,SOGA1,ZDHHC2,IKZF4,CHEK2,RASSF6,SOX9,KIF21B,TMEM88B,EPHA4,ENTPD3,CTRB1,KCNK16,TM4SF4,VWA5B2,NEIL3,PPP1R3C,RRAGD,PLPP3,TRIM11,PFN2,BEX4,BEX2,NRN1,RWDD2A,EPAS1,GIPR,STXBP1,ARX,PCBP4,TSPAN4,B4GALNT1,TSPAN2,BBS1,CARMIL3,DTNA,PTPRN2,STAC,TNFSF15,ST8SIA3,TREX2,MYO5A,ID4,PCSK1,NRP2,TMEM151B,TENM4,PTPRN,GBE1,DIRAS2,SLC7A11,GYS1,PCLO,DNER,FFAR1,TNFRSF12A,MME,GFRA1,SLC35G2,PROX1,AP3B2,KIF27,NR5A2,KIT,MAPT,ALDOA,DBN1,CXCR4,CRIP1,ZFP14,RXRA,CAMK2N1,TCEAL1,APBB1,MSX1,PAK3,GABRD,EMC9,PURG,KLHL3,GCG,GRHL3,GCK,SH3RF2,TTC8,KRT18,HIST3H2A,QPCT,KLHL7,PCDHB16,ESYT1,CD68,FOXA1,TPSB2,ZWILCH,CD80,LOXL4,NR3C1,CELSR1,ETS1,CELSR3,RGS4,SCGN,PLAU,KIF5C,FAM174A,CAPN2,NUSAP1,HADH,PPFIA4,RGS9,TGM2,CASR,KIRREL2,WNT5A,PLA2G15,MYCN,SHPK,GPD1,TBC1D24,SCG5,SCG3,SCG2,NDRG4,CACNA1B,CACNA1A,SLC1A3,CPLX2,PCSK1N,HRH3,ADGRG6,NXPH1,PACSIN1,PRNP,TGFB2,CBX6,ACBD4,ARHGEF39,TRPV2,HMGA1,HMGA2,MSN,DNAJC12,INHBB,SYT7,ARHGAP24,PLCXD3,DAO,TMEM236,DLG4,BHLHE40,NABP1,GALK1,LRP11,GPSM2,ACADVL,SLC2A1,PKD1,SPRED3,GRM4,DBP,MCF2L,GDAP1L1,ARFGEF3,HIST1H1C,ABCC8,ETV1,SSTR1,GPCPD1,SYNGR4,SSTR3,TGFBR3,RCN1,ALDH1A1,CAMK2B,CCDC189,RGS17,RGS13,LEF1,CRMP1,TFPI,THBS1,AURKB,HSPD1,DDN,GNG2,SH3TC2,SV2A,GNG4,SPOCK2,SLIT2,PCDHGC4,CADPS,PDX1,MEIS2,FAM167A,SARDH","88","176.6","Pax6","false","false","","Unclustered","4.472727272727273","0","ENSMUSG00000027168"
"96","","",,,"Trim11","false","false","","Unclustered","2.0","0","ENSMUSG00000020455"
"97","ARCHS4 Coexpression,24;Enrichr Queries,51;ReMap ChIP-seq,132;GTEx Coexpression,76","MDC1,CNTFR,CHIC1,ENO1,MYLK,HTR6,GJA1,DPYSL5,DPYSL3,NAMPT,MYB,CYP1B1,MNX1,WLS,IER3,CHGB,DAPK1,DNAAF1,CACNA2D1,STARD9,EML1,ISL1,DKK3,HOXB9,ZC2HC1A,MAP1B,RBP1,HOXB4,HOXB3,HOXB8,SLCO5A1,SLC5A3,FAM149A,PRKAR2B,PDGFC,RREB1,NKX2-2,CDK17,NFE2,PRELID2,JUN,FZD3,FZD4,NEBL,FZD7,PLK2,FN1,NR1D1,COL1A2,SLC6A9,FXYD2,FAT4,XKR4,PAM,FERMT2,CDKN1C,BTG2,LRRC10B,TGFB1I1,PHF1,ATF7IP2,ADM,RCSD1,CSRP2,TUBA1A,AIFM1,TIMP3,RNF150,ANXA1,DENND2A,ROM1,SLC39A10,PRSS16,ELOVL6,PAX6,GCHFR,BACE1,FAM222A,TUBB2A,SLC7A8,ANGPTL6,KCNMA1,PXDN,PLCB1,CRYAB,VAMP2,SAMD5,FAXC,PRUNE2,PTGS2,PLAGL1,UCP2,ANO10,CKB,RNF130,RUNX1T1,GSN,NMNAT2,SULF2,COL3A1,ABI2,DHRS9,RIMBP2,FOSB,ETFBKMT,HSPA1B,RAB3C,NRROS,CHPF,IRS1,TUSC3,CHRM4,NAB2,CLU,SLC8A1,MYLK3,RIMS2,MFSD13A,EFEMP1,DACH1,CDH2,SLCO2B1,SLC25A45,SH2D5,FADS1,SLC16A5,KCNH2,SEMA6A,IGFBP5,TMEM178B,FST,SEMA6D,IGFBP2,MAGI2,NEAT1,MYT1,DMWD,TNIK,INTS6L,PFKFB3,ZC4H2,INSIG1,ARL3,ITPR1,GMPR,NREP,PHF21B,NEUROD1,NACC2,IGFBP7,PLXNA4,KCNF1,SDF2L1,HTR1D,REEP1,MFHAS1,CXCL10,PTPRC,NBEA,P4HA2,CPE,KCNK6,LEAP2,CELF2,CELF3,UNC80,DUSP10,SCRN1,SGCB,CEP170,BCAS1,PLA2G12A,ADGRV1,CHPF2,ARL4C,PTP4A3,PKM,BMP2K,ST6GALNAC4,ST6GALNAC6,SEMA3C,LRP3,CXXC5,CXXC4,COCH,CACNG4,MARCKSL1,PPP1R14C,RNF24,PRRX1,MACC1,PLCL1,SYT14,FBXL16,MBOAT4,NFASC,SYT11,ASXL3,NOVA2,INSM1,SPARC,FAM89A,DIXDC1,SOGA1,SYNPR,RESP18,TNFSF10,KIF21A,SOX9,THSD7A,EPHA4,EPHA7,PAQR4,IL1R1,LIMCH1,ACSL3,TIAM2,NEIL3,KCNQ4,MXRA7,KCTD12,KCTD17,PLPP3,CTXN1,STX1A,SLC22A4,NUMBL,PDE1B,EPAS1,MAGED1,SLC35D3,TSHZ2,INPP5A,MAP2,MAP6,SARAF,ST8SIA6,SCN3A,BBS1,PTPRN2,LRRN2,SLC35E4,ST8SIA3,DCLK2,NBEAL2,ID4,RGL1,ITM2C,PCSK1,NRP2,TENM4,PTPRN,ROBO1,SERP2,PCLO,CAMKV,PSD,CD53,CBR1,MME,ANO8,ANO6,RENBP,ANO3,CLDN15,KIT,PDZRN3,DBN1,TAGLN,AMIGO2,AKR1D1,CXCR4,CAPG,CAMK2N1,GPC2,RPRML,PAK3,GRHL3,SORBS2,HIST3H2A,STK17B,KIF26B,PCDHB16,RAMP1,CDK5R1,SCARB1,NR3C1,CELSR1,ETS1,CELSR3,RGS4,SCGN,TBC1D31,KIF5C,HADH,RGS9,TGM2,SPINK4,POSTN,CASR,WNT5A,MID1,TANC2,ERN1,COL4A2,COL4A1,GPRIN1,TBC1D24,SCG5,SCG3,SCG2,NDRG4,ARHGEF25,HPCA,ARHGAP18,CACNA1A,SLC1A3,CACNA1C,KLHL13,MRO,PLD1,CACNA1H,ADGRG1,CALD1,ISOC1,TAC1,MYH10,SYT5,PRNP,TCAF1,TGFB2,ACBD4,KLHL23,SSC5D,GNAO1,DAP,BMP2,PLCXD3,GNAL,NR4A3,ATG16L2,BHLHE40,FAM187B,THRB,THRA,PLEK,SLC2A1,HSPB1,ADGRE5,HIST1H1C,HS3ST3B1,ABCC8,ETV1,IQCD,ETV5,CCNA2,ACTA2,TGFBR3,TBC1D2,DDAH2,ATP6V1B2,CDH13,RBMS3,HEMGN,RGS14,DCTN2,LEF1,CRMP1,ATP1A1,TFPI,THBS1,AURKB,NCALD,DLL3,RASD2,MXI1,SLIT1,HES1,SLIT2,GALNT5,CADPS,PDX1,ARID3A,MAPK13,SLC4A8","24","70.75","Meis2","false","false","","Unclustered","0.5","0","ENSMUSG00000027210"
"98","ARCHS4 Coexpression,386;Enrichr Queries,503;ReMap ChIP-seq,80;GTEx Coexpression,866","IFITM1,SPARC,MKI67,GJA1,RINL,CHEK2,RASSF5,MYB,LONP1,CYP1B1,KIF21B,SOX9,HOXA4,IER3,EPHA4,PRKCH,PAQR4,DAPK1,HSPG2,MTURN,CLDN6,CLPS,CLDN9,RBP1,KCNQ4,RIN3,GSAP,VDAC1,DNA2,EPAS1,ARX,CFP,KCNQ1OT1,RHBDL3,RREB1,LHPP,NFE2,JUN,CARMIL2,LRRN3,NEBL,LRRN2,FAM78A,EDEM2,FN1,FZD9,NFATC3,PYCR1,NFATC2,ABCA7,CCDC88B,COL1A2,FAT4,PAM,ITM2C,ARHGAP9,DENND1C,FKBP11,COL18A1,BTG2,TMEM151B,LRRC10B,SH3KBP1,LPCAT1,GPT,ADM,SLC7A11,RCSD1,LIMD2,PCLO,FAM102A,IMPA2,TIMP3,GAST,EMB,TINAG,CD53,PSD,ANXA1,TNFRSF12A,MME,TMC8,SLC35G1,NME5,TMEM173,VAV1,PALD1,APBB1IP,GPRC5B,TUBB2A,PXDN,KIT,HAP1,SYNC,ARHGEF6,SAMD5,AMER2,KANK1,OAT,PRUNE2,PAPLN,SEZ6,AFM,FAM129A,CXCR4,AFP,PTGS2,GNAI1,FGD3,IL12RB1,CDKN2D,LHFPL5,FMO1,FMO2,GPR4,SULF2,CENPF,COL3A1,STK17B,KLHL7,FOSB,TMEM229A,CDKN3,SCARB1,ANKRD37,NARF,ANKRD13D,GIMAP1,RORA,JADE2,CELSR1,GIMAP6,ETS1,GIMAP8,MFSD13A,CDH2,BASP1,COTL1,SACS,DENND5A,PLXNC1,PIM2,TGM2,ZBP1,POSTN,SEMA6A,IGFBP5,ZBTB38,WNT5A,F2R,IGFBP2,CYBB,PIPOX,SDHB,VMAC,PROCR,TMEM135,DOK3,MYCN,COL4A1,MFNG,S100A6,ADAM8,SCG2,CARD11,PFKFB4,AKNA,LPL,AK4,NDRG1,MTM1,RASGRP3,ADGRG1,PODXL,IGFBP7,TNFRSF14,CPA6,TGFB2,ATP8B2,HMGA2,MSN,EVX1,CORO2A,SYT7,CXCL10,BMP2,PTPRC,BAMBI,BHLHE40,RCAN3,NFE2L3,CDK1,SP5,AMOTL1,TTC26,ITGAM,THRB,PLEK,PDE3B,SLC2A1,ATP2A3,ITGAL,SYNE2,PSTPIP1,DUSP10,LBH,SCRN1,ADGRE5,LBR,DACT1,HS3ST3B1,SUN2,TRIM62,TNFRSF19,URAD,PLAUR,ETV1,IQCD,VPS37B,ETV4,ETV5,GIP,ARL4C,ACTA2,TGFBR3,HSH2D,RCN1,TBC1D2,PTP4A3,TFDP2,RASA3,LCK,IRF1,EVL,GAPDH,SEMA3C,RGS14,PLA2G1B,CCDC69,LEF1,NLRC3,SEMA3E,ADD3,BPHL,THBS1,AURKB,DDN,HSPD1,ABLIM1,SPOCK2,MXI1,E2F2,DNAJB9,FYN,RFFL,CADPS,PDX1,MEIS2,BAIAP3,FMNL3,FMNL2,PIK3IP1,CD244","452","458.8","Lef1","false","false","","Unclustered","0.25","0","ENSMUSG00000027985"
"100","","",,,"Tle2","false","false","","Unclustered","1.6666666666666667","0","ENSMUSG00000034771"
"104","","",,,"Apbb1","false","false","","Unclustered","5.785714285714286","0","ENSMUSG00000037032"
"109","Literature ChIP-seq,164;ARCHS4 Coexpression,344;ENCODE ChIP-seq,22;Enrichr Queries,375;ReMap ChIP-seq,159;GTEx Coexpression,281","ANKLE1,MAML2,TMEM94,MRGPRE,ELK3,MYLK,ZC3H12D,SAMD14,GJA1,CREB3L4,NAMPT,EPSTI1,CYP1B1,HOXA5,HOXA4,IER3,GAMT,HES7,PRKCH,DNAAF3,DHDH,RNASE4,HSPG2,CLDN6,RBP7,DEPDC1B,RNF125,HOXB9,WDR81,RBP2,CLDN9,TFR2,HOXB4,ACOT2,JTB,HOXB3,UQCRC2,HOXB8,MYL9,PIF1,CDCA2,ABCB6,RETSAT,SLC30A10,GUCD1,CRACR2B,RDH11,HMOX1,ST3GAL1,RREB1,ST3GAL2,PRELID2,JUN,TIPARP,MCAM,PLK2,EDEM2,FN1,NFATC2,ABCA7,SLC16A10,NR1D1,SLC16A13,FOSL1,COL1A2,SLC6A9,WDR5B,LGMN,DENND1C,BTG2,GPT,ADM,HIF3A,RCSD1,FAM102A,AIFM1,TIMP2,TCP11L1,ANXA6,TIMP3,TCP11L2,EMB,NDC1,LEFTY1,CNOT6L,TPI1,ANXA1,DUSP3,IFNGR1,ANXA3,ROM1,MYOF,ANXA5,ITPK1,TMC8,TMEM40,SERPINB9,TMEM173,F2,APBB1IP,PLCB3,RIPPLY3,SLC7A7,INF2,PLCB4,OAF,PXDN,CDC42EP3,ADSSL1,CKS2,PLEKHO2,PAFAH1B3,VAMP2,MGLL,GRAMD1A,PKN3,FAM129A,SNX32,TMEM160,SNX33,PTGS2,CENPA,FAM117B,FGD2,FAM117A,FAM129B,TMEM71,FGD3,NEURL1B,PRSS50,CARNS1,UCP2,FLNA,RABAC1,GSN,GSR,NR1H3,GPR4,SULF2,PSMB9,DHRS7,SNX16,CLCF1,LYRM7,FOSB,YPEL3,NRROS,ANKRD13D,EXOC3L4,CSF1,CHPF,NAB2,LY75,RORA,TNF,FADS3,EFEMP2,TUBB6,FCGRT,SCMH1,NUDT19,SLC16A6,SLC25A43,SLC25A45,SLC16A3,FADS1,PPP1R16B,BNIP3L,MYLIP,PCYT2,DGAT1,ZBTB38,F2R,NEAT1,ARMCX3,DISP2,RAB30,MFNG,DMWD,NAAA,SLC9A9,S100A6,SLC25A53,TNIK,SQSTM1,PHLDB2,SLC27A5,INTS6L,KANK3,BRSK1,PFKFB3,ARL6,ABHD8,ITPR1,LY96,FBXO48,SLC9A3R2,PMVK,TNFRSF14,IGFBP7,FN3K,TMEM120B,SDF2L1,ATP8B2,OSBPL2,HPS4,CXCL10,PTPRB,PTPRC,GGCX,P4HA2,RCAN3,SPIRE1,ESAM,MAFK,CNIH2,RNF186,MAP3K12,KCNK6,CELF2,AKAP8L,ARRB1,NRARP,ITGAL,SYNE3,NADK2,PSTPIP1,DUSP10,LBH,ACP6,IDH3B,WDR6,ACP5,ITGB7,UPP1,ME2,SMIM14,PLEKHG3,PLEKHG1,KSR1,SGIP1,SH2D3C,VPS37B,REXO2,SPTB,BET1L,ARL4C,PTP4A3,IMPACT,PKM,ITGA7,BIRC5,ANG,EVL,ITGA5,LCT,GAPDH,CCDC69,NLRC3,SEMA3F,SELENBP1,AP3M2,ABLIM1,SRR,ABLIM2,SH3BP1,TIFA,TRIM47,E2F2,FYN,RBBP7,BAK1,ACSS1,WASF1,ALOXE3,SEC11C,SLC12A4,CYP4B1,CTNS,FBXL16,SYT13,PTPN13,SORL1,TTC39A,KLF7,DNAJA4,CTH,TRIM38,CPNE8,IFITM1,AHCYL2,SPARC,PANK3,FAM89B,AQP9,CBLB,GCC1,IFIT3,ICAM1,LGALS3,RINL,FRAT2,RASSF5,CHEK2,LONP1,KIF21B,SKP2,PDK1,RSAD2,IL1R1,SLC11A2,ALG2,ACSL5,MFSD11,CPT1C,RIN3,PLPP3,ATP6V0D1,STX1A,SLC22A4,EPAS1,STXBP1,MGST3,SMIM1,TTBK1,RACGAP1,PCBP4,STC2,TSPAN4,FAM43A,SNX9,KCNN4,CDR2,TMEM86A,CARMIL2,FAM78A,SLC33A1,PYCR1,NBEAL2,TRERF1,PARP12,GADD45G,CCDC88B,ECHDC1,KYAT1,ITM2C,TMEM151B,ACY1,SH3KBP1,CITED4,STAB2,SLC7A11,KIF11,PTPRH,CLYBL,KHK,LIMD2,KIF15,GYS1,MAP1LC3A,SLC22A15,MIS18BP1,RAC3,PSD,NXPE3,CD53,ATP6V0B,EDN1,TMEM150A,TNFRSF12A,IL15,IZUMO1,ANO8,KIF24,RENBP,CBFA2T3,VAV1,ZDHHC14,RAD51B,ALDOA,DBN1,SDCCAG8,CD63,NAPB,TAGLN,SLC43A3,CXCR4,CRIP2,CAPG,CRIP1,RASIP1,STX11,CST3,ZFP14,REM2,EMC9,MPZL2,PLEKHA2,VEGFC,TCEA2,ESYT1,B9D2,CD68,SAMD9L,NARF,CD83,GIMAP1,NRM,CPOX,BUB1B,JADE2,GIMAP6,NR3C1,GIMAP8,CCDC28A,TMEM143,RDM1,CHCHD3,TBC1D31,PLAU,BASP1,CCRL2,COTL1,CAPN2,HADH,SBF2,TGM2,SPINK4,CHRNB1,CD93,ARID5A,SDHB,ERN1,GPRIN3,DOK3,COL4A2,SELENOS,COL4A1,SHPK,TBC1D24,NUPR1,CARD11,RTN2,AKNA,PLGRKT,HIGD1A,FUT1,NDRG1,TMEM243,ZMAT1,CALD1,CYC1,FAM83D,CCDC141,MYH10,ANKZF1,PACSIN1,SYT5,PRNP,FDPS,SYT3,ACBD4,CAV2,ARHGEF39,TRPV2,HMGA1,CRIM1,MSN,HMGA2,DNAJC12,BMP6,COQ5,EFNA1,ISG20,SEPSECS,DLG4,BHLHE40,NABP1,AMOTL2,ACADVL,THRA,PLEK,PDE3B,SLC2A1,HMGB2,ATP2A3,HSPB1,YBX2,SLC2A4,SLC2A5,PKD1,PITPNC1,HK2,DBP,GRM4,ADGRE5,HIST1H1C,ABCC4,SUN2,EGFL7,TGIF2,CAMK1D,ARHGEF15,PLAUR,DNM1,TAPBP,ACTA2,TGFBR3,CREB3,RCN1,RASA3,VGF,GFOD1,DDAH2,IRF1,OAS3,ADGRF5,CAT,RBMS1,NDUFS2,HEMGN,LAMA5,RGS14,DCTN2,LEF1,ADD3,THBS1,AURKB,DLL4,NWD1,SPOCK2,MXI1,MVB12B,NT5DC3,STOM,HES1,MUTYH,ARID3A,RPIA,XPNPEP1,PIK3IP1,TNIP3,FAM131A,RBM43,ASB1","130","224.2","Ets1","false","false","","Unclustered","3.9847761872301746","1","ENSMUSG00000032035"
"110","","",,,"Ptgs2","false","false","","Unclustered","6.236363636363636","0","ENSMUSG00000032487"
"112","Literature ChIP-seq,156;ARCHS4 Coexpression,123;Enrichr Queries,34","CNTFR,PANK3,ABAT,ENO1,MKI67,SLC4A4,CLDN1,TMEM92,GJA1,FRAT2,DPYSL5,CREB3L4,CHEK2,DPYSL3,MYB,CYP1B1,PIP4K2A,KIF21A,THSD7A,SOX9,CCDC92,SKP2,NCKAP5,CHGB,PDK1,EPHA4,EPHA7,CACNA2D1,P3H1,PRKCA,TM4SF4,MFSD11,ISL1,CLDN6,ZC2HC1C,ZC2HC1A,WDR81,MAP1B,LGALS12,KCTD12,PLPP3,PFN2,ASF1B,BEX4,SLC22A4,BEX3,BEX2,ABCB6,EPAS1,ABCB9,APCDD1,PCBP4,MAP2,TSPAN4,MAP6,TSPAN2,RHBDL3,SCN3A,ST3GAL1,S100A11,CDK17,JUN,FZD3,PTPRN2,NEBL,TIPARP,PLK2,EDEM2,FN1,FZD9,DCLK2,PTK6,TRERF1,ST18,FOSL1,H2AFY2,ID4,KYAT1,FAT4,SERPINI1,XKR4,FERMT2,CDKN1C,BTG2,NRP2,TENM4,PHF1,ADM,SLC7A11,KIF11,ROBO1,KHK,TUBA1A,SLC22A15,CSRP2,ADAMTSL4,IMPA2,TIMP2,TIMP3,NEFL,RAC3,NEFM,TK1,ACADM,DLAT,NXPE3,MME,ANXA3,PGAM1,DENND2A,ELMOD3,GFRA1,PAX6,PROX1,SLC35G1,PDRG1,KIF9,NCOR1,TUBB2A,SLC7A8,PXDN,KIT,KCNMA1,CKS2,PLCB1,ALDOA,PDZRN3,NAPB,FAXC,GREB1L,CXCR4,SNX33,ZFP14,SLC17A9,CAMK2N1,PLAGL1,GPC2,PAK3,RNF130,SH3BGR,RUNX1T1,GDF11,EGLN3,KCNB1,MDH2,NR1H3,SORBS2,GCG,SULF2,DCBLD2,KBTBD3,TTLL7,COL3A1,ABI2,MORN4,PCDHB16,FOSB,NCAPD2,NUCB2,FOXA3,HSPA1B,RAB3C,ANKRD13D,CHPF,IRS1,NAB2,KLHL32,LOXL4,RORA,CELSR1,ETS1,CLU,SLC8A1,CELSR3,TMEM143,SYDE2,FADS2,CDH2,FGF9,ZFP30,KIF5C,BASP1,SESN1,SLC16A6,PLXNC1,GEN1,MYLIP,SEMA6A,DGAT2,IGFBP5,TMEM178B,DGAT1,FST,SEMA6D,WNT5A,IGFBP2,CSGALNACT2,SHISA2,SDHA,MYT1,MELK,COL4A2,COL4A1,SHPK,SELENOP,SCG5,SCG3,TNIK,SCG2,SQSTM1,BRSK2,PARM1,KHDRBS3,ABHD3,ARL3,ITPR1,CACNA1A,LPL,NREP,NDRG1,NPAS2,ACACA,PHF21B,CAMSAP2,NEUROD1,TKFC,PODXL,ADGRG6,H1FX,CYC1,FAM83D,SRGAP1,TMEM120B,FDPS,TGFB2,TCAF1,HPS4,HMGA1,CRIM1,HMGA2,KLHL23,COQ9,CXCL10,PTPRE,BMP2,NR4A3,NBEA,ATG16L2,DLG4,BHLHE40,NFE2L3,CDK1,CPE,CNIH2,PLEKHM3,MXD4,ITGB5,CELF2,CDCA7L,CELF3,ARRB1,ZC3H6,SLC2A4,LMNB1,SCRN1,NAPRT,BOC,IFT57,HIST1H1C,KLF12,CAMK1D,ETV1,IQCD,VPS37B,SYNGR4,KLF15,CKAP4,TGFBR3,DUSP22,CREB3,PTP4A3,SETBP1,DDAH2,ALDH1A1,CDH13,CEBPA,DNAH2,SEMA3C,TUFT1,LEF1,LAMA3,CRMP1,THBS1,CXXC4,AURKB,NCALD,AURKA,HSPD1,DLL4,GNG2,GNG4,POLD1,NT5DC3,TRIM47,IGF2BP3,HES1,SLIT2,IGF2BP2,ALOXE3,MARCKSL1,CADPS,CTNS,MBOAT2,SORL1,MEIS2,FMNL3,SLC4A8,KLF7,ASXL3,NOVA2,FAM131A,AQP11,INSM1","39","104.3","Dach1","false","false","","Unclustered","5.2","0","ENSMUSG00000055639"
"117","","",,,"Ckmt1","false","false","","Unclustered","6.9743589743589745","0","ENSMUSG00000000308"
"120","","",,,"B9d1","false","false","","Unclustered","1.6666666666666667","0","ENSMUSG00000001039"
"121","","",,,"Col6a1","false","false","","Unclustered","1.6666666666666667","0","ENSMUSG00000001119"
"125","","",,,"Tubb6","false","false","","Unclustered","8.952380952380953","0","ENSMUSG00000001473"
"129","ARCHS4 Coexpression,1462;Enrichr Queries,1055;GTEx Coexpression,1262","MDC1,BTG2,ACADVL,ITGB5,PHF1,SLC2A1,TDRP,HSPB1,NR3C1,CELSR1,SMC4,PKD1,CELSR3,ICAM1,HERPUD1,SESN1,TIMP2,LONP1,WDR6,IER3,HIST1H1C,TSPYL2,SUN2,TLE2,GABARAPL1,CLUH,H2AFV,ELOVL6,NIPSNAP1,ACAP3,PTP4A3,TUBB2A,PKM,WDR81,SOAT2,MAP7D1,MADD,PXDN,CAT,ALDOC,ALDOA,GAPDH,SQSTM1,STX1A,MACF1,KDM3A,INSIG1,CXCR4,ABCB9,NDRG1,RAP1GAP,AURKB,HSPD1,DPP7,HMOX1,FLNA,IARS2,FYN,H1FX,CKB,ANKZF1,MUTYH,RIC3,TMEM120B,PRNP,JUN,HPS4,FN1,NBEAL2,ABCA7,GADD45G,UEVLD,PFKL,BHLHE40,COQ8A,YPEL3,MXD4,LGMN,ITM2C","1459","1260.0","Akap8l","false","false","","Unclustered","6.377777777777777","0","ENSMUSG00000002625"
"130","","",,,"Jag2","false","false","","Unclustered","4.166666666666667","0","ENSMUSG00000002799"
"134","","",,,"Phyhip","false","false","","Unclustered","8.836363636363636","0","ENSMUSG00000003469"
"142","","",,,"Dlst","false","false","","Unclustered","2.4000000000000004","0","ENSMUSG00000004789"
"145","","",,,"Slc2a9","false","false","","Unclustered","5.785714285714286","0","ENSMUSG00000005107"
"156","","",,,"Zdhhc24","false","false","","Unclustered","6.236363636363636","0","ENSMUSG00000006463"
"157","","",,,"Bbs1","false","false","","Unclustered","3.7333333333333334","0","ENSMUSG00000006464"
"160","","",,,"Hap1","false","false","","Unclustered","7.644444444444445","0","ENSMUSG00000006930"
"161","","",,,"Crlf1","false","false","","Unclustered","6.805555555555555","0","ENSMUSG00000007888"
"171","","",,,"Scarf2","false","false","","Unclustered","6.805555555555555","0","ENSMUSG00000012017"
"180","","",,,"Cyp2j9","false","false","","Unclustered","8.952380952380953","0","ENSMUSG00000015224"
"182","","",,,"Itga2","false","false","","Unclustered","3.4285714285714284","0","ENSMUSG00000015533"
"185","","",,,"Tnr","false","false","","Unclustered","6.236363636363636","0","ENSMUSG00000015829"
"187","","",,,"Ncapg","false","false","","Unclustered","5.571428571428571","0","ENSMUSG00000015880"
"188","","",,,"Celsr1","false","false","","Unclustered","6.533333333333333","0","ENSMUSG00000016028"
"189","","",,,"Syt14","false","false","","Unclustered","7.418181818181818","0","ENSMUSG00000016200"
"190","","",,,"Phf21b","false","false","","Unclustered","6.533333333333333","0","ENSMUSG00000016624"
"192","","",,,"Scube1","false","false","","Unclustered","9.545454545454547","0","ENSMUSG00000016763"
"197","","",,,"Rab11fip4","false","false","","Unclustered","6.236363636363636","0","ENSMUSG00000017639"
"209","","",,,"Atp6ap1","false","false","","Unclustered","6.533333333333333","0","ENSMUSG00000019087"
"210","","",,,"Tmem160","false","false","","Unclustered","9.102564102564102","0","ENSMUSG00000019158"
"214","","",,,"Iyd","false","false","","Unclustered","5.384615384615385","0","ENSMUSG00000019762"
"216","","",,,"Lama4","false","false","","Unclustered","6.611111111111111","0","ENSMUSG00000019846"
"217","","",,,"Hebp2","false","false","","Unclustered","6.533333333333333","0","ENSMUSG00000019853"
"221","","",,,"Ctgf","false","false","","Unclustered","0.4","0","ENSMUSG00000019997"
"237","","",,,"Fkbp1b","false","false","","Unclustered","3.238095238095238","0","ENSMUSG00000020635"
"262","","",,,"Slc6a19","false","false","","Unclustered","0.6666666666666666","0","ENSMUSG00000021565"
"272","","",,,"Fgf9","false","false","","Unclustered","5.2","0","ENSMUSG00000021974"
"285","","",,,"Matn2","false","false","","Unclustered","5.5","0","ENSMUSG00000022324"
"296","","",,,"Stxbp5l","false","false","","Unclustered","6.236363636363636","0","ENSMUSG00000022829"
"300","","",,,"Robo1","false","false","","Unclustered","6.377777777777777","0","ENSMUSG00000022883"
"308","","",,,"Cxcl13","false","false","","Unclustered","5.2","0","ENSMUSG00000023078"
"309","","",,,"Epb42","false","false","","Unclustered","4.0","0","ENSMUSG00000023216"
"311","","",,,"Acy1","false","false","","Unclustered","5.384615384615385","0","ENSMUSG00000023262"
"312","","",,,"Celsr3","false","false","","Unclustered","4.464285714285714","0","ENSMUSG00000023473"
"315","","",,,"Agpat4","false","false","","Unclustered","5.066666666666666","0","ENSMUSG00000023827"
"317","","",,,"Cldn6","false","false","","Unclustered","6.222222222222221","0","ENSMUSG00000023906"
"319","","",,,"Enpp4","false","false","","Unclustered","6.236363636363636","0","ENSMUSG00000023961"
"322","","",,,"Themis3","false","false","","Unclustered","4.166666666666667","0","ENSMUSG00000024105"
"323","","",,,"Cacna1h","false","false","","Unclustered","6.593406593406593","0","ENSMUSG00000024112"
"327","","",,,"Col11a2","false","false","","Unclustered","6.0","0","ENSMUSG00000024330"
"337","","",,,"Slc27a6","false","false","","Unclustered","6.533333333333333","0","ENSMUSG00000024600"
"343","","",,,"Kif20b","false","false","","Unclustered","8.952380952380953","0","ENSMUSG00000024795"
"348","","",,,"Efemp2","false","false","","Unclustered","9.010989010989011","0","ENSMUSG00000024909"
"350","","",,,"Plce1","false","false","","Unclustered","8.672727272727272","0","ENSMUSG00000024998"
"351","","",,,"Hells","false","false","","Unclustered","6.377777777777777","0","ENSMUSG00000025001"
"353","","",,,"Arl3","false","false","","Unclustered","4.761904761904762","0","ENSMUSG00000025035"
"357","","",,,"Loxl4","false","false","","Unclustered","9.35897435897436","0","ENSMUSG00000025185"
"360","","",,,"Gdf11","false","false","","Unclustered","6.593406593406593","0","ENSMUSG00000025352"
"363","","",,,"Lmntd2","false","false","","Unclustered","2.7","0","ENSMUSG00000025500"
"364","","",,,"Tspan4","false","false","","Unclustered","0.6666666666666666","0","ENSMUSG00000025511"
"368","","",,,"Pfkfb4","false","false","","Unclustered","4.027777777777778","0","ENSMUSG00000025648"
"369","","",,,"Alox5","false","false","","Unclustered","4.464285714285714","0","ENSMUSG00000025701"
"378","","",,,"2010300C02Rik","false","false","","Unclustered","9.696969696969697","0","ENSMUSG00000026090"
"383","","",,,"Dbi","false","false","","Unclustered","0.5","0","ENSMUSG00000026385"
"386","","",,,"Rgl1","false","false","","Unclustered","2.0","0","ENSMUSG00000026482"
"391","","",,,"Rgs7","false","false","","Unclustered","6.236363636363636","0","ENSMUSG00000026527"
"401","","",,,"Gpsm1","false","false","","Unclustered","9.696969696969697","0","ENSMUSG00000026930"
"402","","",,,"Grin1","false","false","","Unclustered","6.0","0","ENSMUSG00000026959"
"405","","",,,"Tfpi","false","false","","Unclustered","8.454545454545455","0","ENSMUSG00000027082"
"411","","",,,"Bub1","false","false","","Unclustered","6.533333333333333","0","ENSMUSG00000027379"
"414","","",,,"Pkia","false","false","","Unclustered","6.681318681318682","0","ENSMUSG00000027499"
"423","","",,,"Serpini1","false","false","","Unclustered","6.769230769230769","0","ENSMUSG00000027834"
"428","ARCHS4 Coexpression,523;Enrichr Queries,12;GTEx Coexpression,990","FOXA1,SPON2,RAB3D,ABAT,CELSR1,MKI67,HID1,DEPTOR,CHEK2,MYB,SLC39A6,NUSAP1,CYP1B1,SLC16A3,FADS1,IER3,GABARAPL1,KCNH6,IGFBP5,PAQR4,IGFBP2,SYTL1,PRLR,OVOL2,SYTL2,DKK3,VMAC,MELK,SOAT2,NAAA,LGALS12,SELENOP,S100A6,JTB,NUPR1,ASF1B,IGSF3,INSIG1,MGST1,NCAPG,PIK3R3,HMMR,NDRG1,RAP1GAP,ACACA,CCNB2,CRACR2A,CCNB1,CRACR2B,TKFC,RDH11,KCNN4,FAM83D,ANKZF1,PRNP,JUN,EPHX2,PLK1,TMEM132A,FN1,FZD9,PYCR1,MSN,INHBB,CORO2A,FBXO32,GADD45G,EFNA1,ISG20,NET1,TDRD1,CXCL10,EFNA3,DLG3,FXYD3,BAMBI,RCAN3,MYO5C,BHLHE40,CDK1,ITM2C,BTG2,ARHGAP8,ICA1,HMGB2,ATP2A3,SLC2A1,HSPB1,LAMC2,ADM,SLC7A11,ABCC12,HERPUD1,LMNB1,LRRC31,IMPA2,TMED3,PBK,IDS,TK1,BCAS1,HIST1H1C,SMIM14,ABCC4,RMI2,SLC2A10,ANXA3,TBC1D8,REXO2,CCNA2,ALDH1A3,BACE2,ASPM,PTP4A3,RASA3,PXDN,KIT,CKS2,TFF3,BIRC5,ALDOC,ACPP,FBP1,DTL,FAM129A,CXCR4,CENPA,THBS1,FAM214A,AURKB,AURKA,SELENBP1,SLC25A29,MXI1,ERBB2,AGR2,E2F2,MAL2,D2HGDH,SPTSSB,CKB,SPDEF,LRRC26,GSN,BIK,MBOAT2,TMCO4,TPD52L1,FMO4,SORL1,TTC39A,DHRS3,CENPF,KRT18,PIK3IP1,SGSM3,SERHL,TCEA3,PCDHB16,COQ8A,NECTIN4,CCL28,YPEL3,CDKN3","523","508.3","Creb3l4","false","false","","Unclustered","4.464285714285714","0","ENSMUSG00000027938"
"433","","",,,"Faxc","false","false","","Unclustered","5.571428571428571","0","ENSMUSG00000028246"
"438","","",,,"Kif24","false","false","","Unclustered","3.4285714285714284","0","ENSMUSG00000028438"
"439","","",,,"Fam219a","false","false","","Unclustered","5.785714285714286","0","ENSMUSG00000028439"
"440","","",,,"Cntfr","false","false","","Unclustered","5.0","0","ENSMUSG00000028444"
"443","","",,,"Rnf11","false","false","","Unclustered","9.35897435897436","0","ENSMUSG00000028557"
"447","","",,,"P3h1","false","false","","Unclustered","6.377777777777777","0","ENSMUSG00000028641"
"448","","",,,"Rad54l","false","false","","Unclustered","4.027777777777778","0","ENSMUSG00000028702"
"449","","",,,"Cyp4b1","false","false","","Unclustered","7.0","0","ENSMUSG00000028713"
"451","","",,,"Htr6","false","false","","Unclustered","0.0","0","ENSMUSG00000028747"
"458","","",,,"Afap1","false","false","","Unclustered","6.533333333333333","0","ENSMUSG00000029094"
"461","","",,,"Cwh43","false","false","","Unclustered","9.487179487179487","0","ENSMUSG00000029154"
"467","","",,,"Chek2","false","false","","Unclustered","3.4285714285714284","0","ENSMUSG00000029521"
"469","","",,,"Iqcd","false","false","","Unclustered","4.761904761904762","0","ENSMUSG00000029601"
"470","Literature ChIP-seq,97;ARCHS4 Coexpression,3;Enrichr Queries,258;ReMap ChIP-seq,49;GTEx Coexpression,329","MAML2,ENO1,SLC4A4,CLDN1,ZC3H12C,CREB3L4,MYB,HIST3H2BA,MNX1,HOXA5,WLS,CHGB,GAMT,HES7,TSPYL2,GABARAPL1,DAPK1,DAPK2,CACNA2D1,RNASE4,BHLHA15,ISL1,RBP4,DEPDC1B,CLPS,RFX6,TEP1,RBP1,LGALS12,JTB,TSPYL5,ASF1B,FICD,GATA4,FAM149A,LDHB,CRACR2B,RDH10,GALR1,NKX2-2,GSTM4,MYH7B,JUN,ABCA5,TIPARP,MCAM,EIF2AK3,SLC16A12,FZD9,NFATC2,NR1D1,A1CF,ST18,FOSL1,PKIA,FXYD2,PAM,LRRC10B,ADM,SHH,C1QTNF1,FAM102A,IMPA2,TCP11L2,GAST,NEFM,EMB,EDARADD,TPI1,SLC2A13,PAX4,PRSS16,PAX6,MANEAL,BACE1,TMEM37,FAM222A,RIPPLY3,TUBB2A,SLC7A8,KCNMA1,PXDN,CHST4,VAMP2,SAMD5,GRAMD1A,PRUNE2,HOXD13,PAPSS2,PLAGL1,SC5D,ANO10,GCNT4,KCNB2,POU4F1,SLC8B1,DHRS3,AGT,STXBP5L,GPR142,RIMBP2,FOSB,NUCB2,IRS1,TUSC3,FRY,CLU,FADS2,DACH1,SALL2,NEK1,SLC25A45,CPA2,RAB2B,MYLIP,IGFBP5,ZBTB38,NEAT1,MYT1,RAB30,AJUBA,PHLDB2,LY6E,SHC2,PARM1,GPR119,ABHD3,INSIG1,TNFRSF11A,ACAT1,NEUROD1,HACL1,NPTX1,NPTX2,BDNF,MLXIPL,CXCL10,BFSP1,NBEA,P4HA2,LHX1,RCAN3,CPE,SERINC1,RNF186,SNAP25,MTCL1,AKAP8L,RASGRF1,CELF3,APIP,ZC3H6,FOXM1,SYNE2,UNC80,DUSP10,DDI2,SLC37A4,PLEKHG3,KSR1,SGIP1,BET1L,ADRA2A,DNAJC3,PTP4A3,PKM,CEBPA,ACSS2,CXXC5,CXXC4,ABLIM1,DNAJB9,RFFL,WASF1,CACNG4,SEC11C,KCNJ11,PRRX1,IDH3G,MACC1,KCNIP3,SYT16,SYT13,MBOAT4,SORL1,TTC39A,MYO1D,RAB15,INSM1,NECTIN3,SLC25A35,AQP8,GFI1,LDLRAD3,AQP3,ZDHHC2,IKZF4,RINL,NIPAL2,CHEK2,RESP18,RASSF6,DPF3,SOX9,ENTPD3,CTRB1,ALG2,KCNK16,TM4SF4,VWA5B2,CPT1C,GCAT,CYP2U1,RRAGD,KCTD14,MXRA7,ATP6V0D1,CFTR,STX1A,PFN2,SLC22A4,NRN1,EPAS1,GIPR,TSHZ2,STC2,TSPAN2,TMEM184C,DTNA,PTPRN2,LRRN3,SLC33A1,ST8SIA3,IGF2,CIDEA,PYCR1,NBEAL2,TPX2,KLHDC8A,ID4,PDE3A,RGL3,TECPR1,FKBP11,PCSK1,TENM3,ACY1,SH3KBP1,PTPRN,ICA1,HNF4G,PCSK9,HERPUD1,MAP1LC3A,SH3PXD2A,STBD1,HNF4A,FFAR4,IDS,FFAR3,FFAR2,SEC61B,FFAR1,TMED6,LMCD1,TMEM150A,PROX1,NR5A2,C1QA,MAGEH1,SLC43A1,AKR1D1,AKAP7,CXCR4,TCEAL8,CAMK2N1,SPTSSB,MSX1,PTGES2,LHFPL5,GCG,GCK,KBTBD3,NUDT7,TPPP3,TTC8,SGSM3,QPCT,PCDHB16,ESYT1,RTN4IP1,FOXA3,CDK5R1,NEUROG3,FOXA1,NARF,GDA,JADE2,NR3C1,TMEM143,RDM1,SCGN,KIF5C,FAM3B,NUSAP1,ENPP4,HADH,RGS9,CASR,SPINK1,KIRREL2,CD93,SLC30A2,WNT5A,ANXA10,RUNDC3A,ERN1,MYCN,GPD1,SCG5,SCG3,LMX1B,SCG2,RTN2,UBA5,CACNA1B,CACNA1A,PLD1,HIGD1A,FUT1,ACACB,CACNA1H,ADGRG1,PCSK1N,NPC1L1,TAC1,RAI2,ARHGEF37,VDR,DNAJC12,EVX1,SYT7,ACSF2,EFNA1,SDK1,DAP,BMP2,PLCXD3,AMACR,CCPG1,FEV,BHLHE40,CRYL1,LRP11,PNLIPRP1,THRB,ATP2A3,HSPB1,SLC2A2,LAMC2,SLC2A4,SLC2A5,DBP,ABCD1,ARFGEF3,HIST1H1C,DDX58,ABCC8,ETV1,IQCD,SSTR1,SYNGR4,SSTR3,ETV5,CKAP4,TAPBP,TGFBR3,VGF,NDUFS2,RGS17,HLF,PLA2G1B,RGS16,LEF1,SLC3A1,CRMP1,ATP1A1,ADD3,CLN6,AURKB,DLL3,RASD1,GNG4,NT5DC3,HES1,HES2,MUTYH,CHGA,BNIP3,TPBG,QPCTL,PCDHGC4,CADPS,LIMK1,PDX1,NAP1L3,ARID3A,SUOX,MEIS3,MEIS2,SGPP2,CAPN13,RSPH1,FAM167A,XPNPEP1,ASB4","68","147.2","Pdx1","false","false","","Unclustered","2.727272727272727","0","ENSMUSG00000029644"
"472","","",,,"Actl6b","false","false","","Unclustered","5.653846153846154","0","ENSMUSG00000029712"
"478","","",,,"Hpgds","false","false","","Unclustered","6.533333333333333","0","ENSMUSG00000029919"
"485","","",,,"Dmwd","false","false","","Unclustered","6.593406593406593","0","ENSMUSG00000030410"
"487","","",,,"Fam189a1","false","false","","Unclustered","4.761904761904762","0","ENSMUSG00000030518"
"488","","",,,"Rab30","false","false","","Unclustered","3.466666666666667","0","ENSMUSG00000030643"
"493","","",,,"Cdr2","false","false","","Unclustered","3.0","0","ENSMUSG00000030878"
"495","","",,,"Syt8","false","false","","Unclustered","9.545454545454547","0","ENSMUSG00000031098"
"496","","",,,"Syp","false","false","","Unclustered","4.0","0","ENSMUSG00000031144"
"497","","",,,"Pim2","false","false","","Unclustered","5.785714285714286","0","ENSMUSG00000031155"
"498","","",,,"Ophn1","false","false","","Unclustered","5.333333333333333","0","ENSMUSG00000031214"
"499","","",,,"Awat2","false","false","","Unclustered","7.5636363636363635","0","ENSMUSG00000031220"
"500","","",,,"Flna","false","false","","Unclustered","3.7333333333333334","0","ENSMUSG00000031328"
"502","","",,,"Car5b","false","false","","Unclustered","6.377777777777777","0","ENSMUSG00000031373"
"503","","",,,"Piga","false","false","","Unclustered","7.822222222222222","0","ENSMUSG00000031381"
"504","","",,,"Renbp","false","false","","Unclustered","3.466666666666667","0","ENSMUSG00000031387"
"505","","",,,"Atp11a","false","false","","Unclustered","9.487179487179487","0","ENSMUSG00000031441"
"510","","",,,"Tmem184c","false","false","","Unclustered","1.4","0","ENSMUSG00000031617"
"513","","",,,"Mfap3l","false","false","","Unclustered","2.4000000000000004","0","ENSMUSG00000031647"
"514","","",,,"Nkd1","false","false","","Unclustered","8.672727272727272","0","ENSMUSG00000031661"
"522","","",,,"Tmem231","false","false","","Unclustered","4.464285714285714","0","ENSMUSG00000031951"
"524","","",,,"Grik4","false","false","","Unclustered","6.611111111111111","0","ENSMUSG00000032017"
"527","ARCHS4 Coexpression,483;Enrichr Queries,266;GTEx Coexpression,566","ANKRD35,SDR9C7,CWH43,ABCA12,FRY,NR3C1,CELSR1,CLDN1,ETS1,SLC8A1,MYLK,ZC3H12D,LGALS3,GJA1,RASSF5,NAMPT,LONP1,LIPK,PLXNC1,SOX9,MFSD2A,EPHB3,IER3,PPP1R16B,EPHA4,GABARAPL1,PRKCH,IGFBP5,DAPK1,CACNA2D1,SEMA6D,PRKCA,FRMD4A,SYTL3,SYTL2,GPRIN3,ERN1,RNF125,SELENOP,TNIK,PLPP3,PFKFB3,AKNA,EPAS1,INSIG1,ITPR1,IL20RB,NDRG1,KLC3,RDH12,SARAF,HIVEP3,ST3GAL1,PPARGC1A,FAM83B,WNT3,CDK17,PRNP,TMEM86A,JUN,TGFB2,GSDMA,NEBL,TREX2,FN1,CRIM1,IFFO2,TRPV3,NFATC2,PYCR1,NR1D1,FBXO32,SYT8,GNG13,ACER1,TPX2,EFNA3,PTPRC,GJB4,LYPD6B,BHLHE40,RCAN3,SP6,ITM2C,BTG2,DOCK4,THRB,CELF2,KRT23,PTPRM,ADM,SLC7A11,DMKN,ITGAL,NKPD1,SYNE2,SYNE1,ROBO1,CASP14,TUBA1B,TIMP3,TCP11L2,EMB,CERS3,SUN2,KLF12,ANXA1,CAMK1D,CNOT6L,MME,TNFRSF19,TMC8,SERPINB5,PARP8,ARL4C,TGFBR3,PTP4A3,PLCB4,DCT,SETBP1,LCK,CDHR1,IRF1,PXDN,KIT,KCNMA1,CDH13,ALDOC,PLCB1,RBMS3,TUFT1,LEF1,FAM129A,CXCR4,ALOX12B,NLRC3,PTGS2,ADD3,THBS1,AURKB,NCALD,ABLIM1,SPOCK2,MXI1,RNF39,SPTSSB,FYN,ALOXE3,RUNX1T1,PLA2G2F,EGLN3,PPP1R14C,GSN,AHNAK2,KRT10,PTPN13,SORL1,KLF7,SLCO3A1,PIK3IP1,COL7A1,STK17B,PCDHB16,TRIM35,FOSB,NECTIN4","428","438.3","Rora","false","false","","Unclustered","5.021010101010101","0","ENSMUSG00000032238"
"536","","",,,"Rwdd2a","false","false","","Unclustered","0.0","0","ENSMUSG00000032417"
"537","","",,,"Stac","false","false","","Unclustered","6.377777777777777","0","ENSMUSG00000032502"
"538","","",,,"Vipr1","false","false","","Unclustered","4.464285714285714","0","ENSMUSG00000032528"
"540","","",,,"Acpp","false","false","","Unclustered","6.236363636363636","0","ENSMUSG00000032561"
"548","","",,,"Rspo4","false","false","","Unclustered","6.533333333333333","0","ENSMUSG00000032852"
"549","","",,,"Ugt8a","false","false","","Unclustered","6.611111111111111","0","ENSMUSG00000032854"
"553","","",,,"Calhm2","false","false","","Unclustered","4.464285714285714","0","ENSMUSG00000033033"
"555","","",,,"Podxl2","false","false","","Unclustered","8.0","0","ENSMUSG00000033152"
"561","","",,,"Atp6v0b","false","false","","Unclustered","6.805555555555555","0","ENSMUSG00000033379"
"562","","",,,"Prss35","false","false","","Unclustered","8.590909090909092","0","ENSMUSG00000033491"
"567","ARCHS4 Coexpression,28;Enrichr Queries,30;GTEx Coexpression,348","DPYSL5,PIP4K2A,THSD7A,NCKAP5,CHGB,EPHA5,TMEM88B,EPHA4,EPHA7,KCNK10,PAQR4,CACNA2D1,DAPK2,KCNK16,TM4SF4,VWA5B2,ISL1,MTURN,ZC2HC1A,RFX6,MAP1B,LGALS12,RBP1,KCTD12,STX1A,PFN2,BEX4,BEX2,PDE1C,STXBP1,ARX,PCBP4,MAP2,MAP6,SCN3A,RAB11FIP4,LHPP,NKX2-2,CDK18,PTPRN2,NEBL,ST8SIA3,FN1,FZD9,RAB39B,GADD45G,FA2H,PEX5L,XKR4,PAM,CD200,CDKN1C,PCSK1,BTG2,TENM4,PTPRN,DIRAS2,SLC7A11,ROBO1,PCLO,TUBA1A,DNER,IDS,NEFM,KIF1A,FFAR1,PAX6,PROX1,AP3B2,ZDHHC14,BACE1,GPRC5B,FAM222A,SLC7A8,PXDN,KIT,KCNMA1,RAPGEF5,PLCB1,TKT,RAPGEF4,AMER2,FAXC,PRUNE2,CRYBA2,CXCR4,PTGS2,TMEM163,CARNS1,APBB1,PAK3,PURG,RUNX1T1,GSN,KCNB2,SORBS2,GCG,NMNAT2,TUBB4A,GCK,STXBP5L,TTLL7,QPCT,PCDHB16,RIMBP2,RAB3C,TUSC3,ROGDI,KLHL32,RORA,CELSR1,CNDP1,SLC8A1,RIMS2,RGS4,SCGN,DACH1,SALL2,CDH2,KIF5C,BASP1,PLXNC1,CHRNB4,IGFBP5,SEMA6D,APLP1,MAGI2,FRMD4A,MYT1,OLFM1,SCG5,TBC1D24,SCG3,SCG2,PARM1,CACNA1B,CACNA1A,LPL,NREP,CPLX2,NDRG1,NEUROD1,PCSK1N,NPTX1,NPTX2,TGFB2,MSN,DNAJC12,CORO2B,SYT7,QDPR,GNAO1,CXCL10,PLCXD3,TMEM236,NBEA,RCAN2,BHLHE40,CPE,SERINC1,SNAP25,CELF2,RASGRF1,CELF3,SYNE1,UNC80,SCRN1,CEP170,ARFGEF3,TRIM67,BCAS1,ADGRV1,ABCC8,ETV1,KSR2,SYNGR4,PTP4A3,ALDH1A1,CAMK2B,RGS17,RGS16,SLC5A11,CRMP1,CXXC5,THBS1,CXXC4,AURKB,NCALD,AGPAT4,GNG2,GNG4,SPOCK2,MVB12B,PRRG1,SEC11C,CHGA,MARCKSL1,PLCL1,CADPS,SYT14,SYT13,SORL1,MEIS2,SLC4A8,NFASC,FAM167A,FMNL2,SYT11,ASXL3,TRIM36,INSM1,UNC79","57","135.3","St18","false","false","","Unclustered","6.236363636363636","0","ENSMUSG00000033740"
"577","","",,,"Rasd2","false","false","","Unclustered","9.696969696969697","0","ENSMUSG00000034472"
"578","","",,,"Zfp418","false","false","","Unclustered","4.761904761904762","0","ENSMUSG00000034538"
"580","","",,,"Ly6d","false","false","","Unclustered","5.785714285714286","0","ENSMUSG00000034634"
"584","","",,,"Parm1","false","false","","Unclustered","5.785714285714286","0","ENSMUSG00000034981"
"587","","",,,"Dcbld2","false","false","","Unclustered","4.0","0","ENSMUSG00000035107"
"597","","",,,"Aamdc","false","false","","Unclustered","5.5","0","ENSMUSG00000035642"
"599","","",,,"Abca7","false","false","","Unclustered","5.571428571428571","0","ENSMUSG00000035722"
"604","","",,,"Slc2a6","false","false","","Unclustered","6.9743589743589745","0","ENSMUSG00000036067"
"610","","",,,"Dna2","false","false","","Unclustered","6.236363636363636","0","ENSMUSG00000036875"
"612","","",,,"Piwil4","false","false","","Unclustered","6.533333333333333","0","ENSMUSG00000036912"
"613","","",,,"Kirrel2","false","false","","Unclustered","2.7","0","ENSMUSG00000036915"
"614","","",,,"Trim3","false","false","","Unclustered","5.9393939393939394","0","ENSMUSG00000036989"
"618","","",,,"Syn1","false","false","","Unclustered","5.5","0","ENSMUSG00000037217"
"623","","",,,"Vgf","false","false","","Unclustered","6.593406593406593","0","ENSMUSG00000037428"
"626","","",,,"Arhgef4","false","false","","Unclustered","8.836363636363636","0","ENSMUSG00000037509"
"628","","",,,"BC022687","false","false","","Unclustered","10.161904761904763","0","ENSMUSG00000037594"
"637","","",,,"Dzip1l","false","false","","Unclustered","5.5","0","ENSMUSG00000037784"
"639","","",,,"Cpe","false","false","","Unclustered","6.377777777777777","0","ENSMUSG00000037852"
"642","","",,,"Snn","false","false","","Unclustered","5.5","0","ENSMUSG00000037972"
"643","","",,,"Rmi2","false","false","","Unclustered","5.5","0","ENSMUSG00000037991"
"645","","",,,"Spats2l","false","false","","Unclustered","5.5","0","ENSMUSG00000038305"
"646","","",,,"Edem2","false","false","","Unclustered","6.236363636363636","0","ENSMUSG00000038312"
"649","","",,,"Ankrd35","false","false","","Unclustered","5.5","0","ENSMUSG00000038354"
"653","ARCHS4 Coexpression,582;Enrichr Queries,96;GTEx Coexpression,538","ANKRD35,RORA,SDR9C7,CWH43,ABCA12,CELSR1,ESPN,CLDN1,AQP3,ICAM1,GJA1,PLAU,CHEK2,LIPG,DAG1,CYP1B1,LIPK,SOX9,CHAC1,SLC16A3,FADS1,EPHB3,MFSD2A,TGM2,IER3,IGFBP5,FST,WNT5A,HIC2,CLDN4,HOXB9,DOK4,LGALS12,TYRO3,NUPR1,PTGES,ABCG2,IGSF3,EPAS1,PLA2G3,IL20RB,CACNA1A,FOXO6,VTCN1,APCDD1,NDRG1,KLC3,ADGRG1,RDH12,PODXL,STC2,HMOX1,FAM83B,WNT3,JAG2,NGFR,MYH7B,TMEM86A,JUN,TGFB2,GSDMA,VDR,PLK2,TREX2,FN1,IGF2,FZD9,IFFO2,TRPV3,HSPA2,SYT8,AIF1L,GADD45G,ARHGAP23,FOSL1,EFNA1,NET1,ACER1,CXCL10,EFNA3,BMP2,GJB4,BAMBI,LYPD6B,BHLHE40,NFE2L3,AMOTL2,MAFK,CDKN1C,KCNK6,BTG2,CCDC120,SLC35F2,HSPB8,SLC2A1,KRT23,TDRP,NRARP,LAMC2,ADM,SLC7A11,DMKN,NKPD1,CASP14,C1QTNF1,ANKRD1,CERS3,TEAD4,EDN1,CLUH,MME,KSR1,PLAUR,WNT9A,REXO2,ETV4,SERPINB5,ACTA2,ALDH1A3,ANO1,PTP4A3,PLCB3,SLC7A8,MMP15,CDHR1,PXDN,MGLL,MDFI,CEBPA,LAMA5,TUFT1,LAMA4,RGS16,LEF1,ALOX12B,SEMA3F,PTGS2,THBS1,BARX2,NKD1,AURKB,FAM129B,SCEL,RASD1,ERBB2,RNF39,KLRG2,SPTSSB,MSX1,FLNC,ALOXE3,MPZL2,PLA2G2F,EGLN3,CDKN2B,IRX4,AHNAK2,GRHL3,ARID3A,KRT10,DHRS3,KRT18,COL7A1,PCDHB16,TRIM35,FOSB,NECTIN4,CRLF1","373","405.3","Sp6","false","false","","Unclustered","8.836363636363636","0","ENSMUSG00000038560"
"655","","",,,"Slc35f1","false","false","","Unclustered","6.805555555555555","0","ENSMUSG00000038602"
"658","","",,,"Nipal2","false","false","","Unclustered","5.653846153846154","0","ENSMUSG00000038879"
"662","","",,,"Siglecf","false","false","","Unclustered","6.417582417582418","0","ENSMUSG00000039013"
"667","","",,,"Camk1d","false","false","","Unclustered","6.593406593406593","0","ENSMUSG00000039145"
"684","","",,,"Ankib1","false","false","","Unclustered","4.523809523809524","0","ENSMUSG00000040351"
"685","","",,,"Wdr47","false","false","","Unclustered","6.377777777777777","0","ENSMUSG00000040389"
"696","","",,,"Iffo2","false","false","","Unclustered","8.672727272727272","0","ENSMUSG00000041025"
"712","","",,,"Mrps27","false","false","","Unclustered","4.523809523809524","0","ENSMUSG00000041632"
"717","","",,,"Csgalnact2","false","false","","Unclustered","8.672727272727272","0","ENSMUSG00000042042"
"722","","",,,"Zfand4","false","false","","Unclustered","3.0","0","ENSMUSG00000042213"
"730","","",,,"Asb4","false","false","","Unclustered","8.672727272727272","0","ENSMUSG00000042607"
"731","","",,,"Ypel3","false","false","","Unclustered","3.0","0","ENSMUSG00000042675"
"737","","",,,"Rai2","false","false","","Unclustered","4.464285714285714","0","ENSMUSG00000043518"
"738","","",,,"Zc2hc1a","false","false","","Unclustered","6.533333333333333","0","ENSMUSG00000043542"
"740","","",,,"Cdc25c","false","false","","Unclustered","2.7","0","ENSMUSG00000044201"
"741","","",,,"Il20rb","false","false","","Unclustered","5.571428571428571","0","ENSMUSG00000044244"
"743","ARCHS4 Coexpression,280;Enrichr Queries,86;GTEx Coexpression,191","GFI1,NSDHL,CYP1B1,SOX9,MNX1,HOXA5,CHGB,EPHB3,EPHA5,ENTPD8,ACSL5,PRKCA,SLC51B,VWA5B2,ISL1,OVOL2,CLDN4,HOXB9,LGALS12,PFN2,NRN1,GATA4,C2CD4C,HSD11B2,PGBD5,PCBP4,TSPAN6,GALR1,TRPM5,RHBDL3,NKX2-2,PRELID2,NGFR,CARMIL2,JUN,PTPRN2,REG4,IGF2,FZD9,NBEAL2,BRI3BP,ST18,GADD45G,ID4,RGL3,PRR36,CDKN1C,RET,PIGR,PCSK1,BTG2,HNF4G,ADM,PTPRH,LRRC31,ROBO1,C1QTNF1,HNF4A,NEFM,TINAG,PSD,EDN1,MME,PAX4,GPBAR1,GFRA1,PAX6,PROX1,CBFA2T3,SYN1,NR5A2,MMP17,PXDN,KIT,KCNMA1,TFF3,PHLPP2,PLPPR2,SEZ6,CRYBA2,CXCR4,ABRACL,CRIP2,TMEM163,MSX1,RUNX1T1,AOC1,BIK,KCNB2,MOCOS,FAM189A1,NMNAT2,FMO4,POU4F1,GUCA2A,FABP1,KIF26B,FKBP1B,GHRL,LGR5,FRYL,CDK5R1,FOXA1,OLFML2B,CELSR1,ESPN,CELSR3,ARHGAP44,RGS4,DACH1,FGF9,PLS1,SPINK4,SEMA6B,EPM2A,ANXA13,IGFBP2,ATP11A,CASD1,MUC3A,MYCN,GPRIN1,NAAA,MADD,LMX1B,BRSK2,PFKFB4,SLC1A1,CACNA1B,CACNA1A,TNFRSF11A,CPLX2,NEUROD1,NEUROD2,IGSF21,PDZD3,NPTX1,NPTX2,TAC1,WNT3,KCNF1,BDNF,EVX1,ADAP1,CXCL10,SDK1,BMP2,DAB1,TMEM236,LHX1,FEV,BHLHE40,SP5,RNF183,CNIH2,SLC26A4,SNAP25,CELF3,LAMC2,PTER,UGT2A3,WDR6,GAL3ST2,ERC2,ABCD1,SLC36A1,URAD,SSTR1,ADRA2A,NIPSNAP1,GIP,ALDH1A3,PTP4A3,VGF,CDHR5,SHANK2,CAMK2B,CEBPA,RGS17,RGS16,LEF1,CRMP1,BARX2,CXXC4,AURKB,DLL3,MUC2,RASD1,NRIP3,BPNT1,BCO1,WASF1,HES2,ATOH1,SEC11C,CHGA,MARCKSL1,PLCL1,IRX4,CADPS,SYT13,MEIS2,MYO1A,OCIAD2,INSM1,PPP1R14D","91","185.7","Neurog3","false","false","","Unclustered","2.0","0","ENSMUSG00000044312"
"744","","",,,"Shisa2","false","false","","Unclustered","3.7333333333333334","0","ENSMUSG00000044461"
"745","","",,,"Fam46c","false","false","","Unclustered","5.0","0","ENSMUSG00000044468"
"749","","",,,"Defb1","false","false","","Unclustered","6.611111111111111","0","ENSMUSG00000044748"
"756","","",,,"Gprin3","false","false","","Unclustered","8.50909090909091","0","ENSMUSG00000045441"
"766","","",,,"Rbp1","false","false","","Unclustered","6.377777777777777","0","ENSMUSG00000046402"
"768","","",,,"Spin2c","false","false","","Unclustered","4.761904761904762","0","ENSMUSG00000046550"
"773","","",,,"Fam187b","false","false","","Unclustered","3.7333333333333334","0","ENSMUSG00000046826"
"776","","",,,"Fam185a","false","false","","Unclustered","6.222222222222221","0","ENSMUSG00000047221"
"777","","",,,"Baiap3","false","false","","Unclustered","8.836363636363636","0","ENSMUSG00000047507"
"782","","",,,"Marcksl1","false","false","","Unclustered","5.571428571428571","0","ENSMUSG00000047945"
"789","ARCHS4 Coexpression,987;Enrichr Queries,126;GTEx Coexpression,190","CPNE8,IFITM1,SPARC,CSF1,MAML2,FAM89A,ETS1,CLU,CLDN1,ELK3,MYLK,FADS3,LGALS3,SLC25A48,GJA1,CHCHD3,CDH2,EVA1B,PLAU,GJA4,DPYSL3,CYP1B1,PLCE1,SOX9,TGM2,IER3,EPHA4,POSTN,PAQR7,CD93,IGFBP5,IL1R1,LIMCH1,FST,WNT5A,IGFBP2,P3H3,SLC51A,PROCR,COL4A2,COL4A1,PLPP3,MYL9,GPLD1,KANK3,NUMBL,NRN1,NPR1,EPAS1,GPR85,LPL,SLC1A3,CACNA1A,FBLN1,APCDD1,FBLN2,NDRG1,ADAMTS15,NEUROD2,CYB5R3,CALHM2,SCUBE1,PODXL,STC2,TSPAN4,SNX9,IGFBP7,RAI2,WNT3,PRNP,CRTAP,JUN,TGFB2,CAV2,FZD4,GFPT2,FN1,IGF2,FZD9,INHBB,BMP6,CIDEC,GADD45G,FOSL1,EFNA1,EHD2,CXCL10,BMP2,COL1A2,BAMBI,BHLHE40,ID4,NABP1,ESAM,PCDHB7,ITM2C,CDKN1C,COL18A1,TRIM72,BTG2,HSPB8,SLC2A1,PTPRM,HSPB1,ADM,SLC7A11,PEAR1,SYNE3,TTC28,C1QTNF1,CSRP2,DSE,ANXA6,TIMP3,RNF150,PLEKHG1,EGFL7,EDN1,ANXA1,ARHGEF15,TNFRSF12A,ANXA5,SLC35G2,PAX6,ADRA2A,ARL4C,ACTA2,RCN1,PTP4A3,KIF9,RASA3,IRF1,PXDN,PLSCR4,COL6A1,GAS6,PPARA,CRYAB,DBN1,RBMS3,CEBPA,TAGLN,LRP1,SEMA3C,PKN3,LEF1,SEMA3G,FAM129A,CXCR4,PTGS2,THBS1,RASIP1,AURKB,NCALD,DLL4,RASD1,CAMK2N1,HES1,BPNT1,SLIT2,CKB,GSN,PRRX1,TPBG,VEGFC,GPR4,ARID3A,TTC39C,MEIS2,EFR3B,DHRS3,COL3A1,XK,KRT18,SYT12,FOSB,CRLF1","419","434.3","Msx1","false","false","","Unclustered","6.514285714285714","0","ENSMUSG00000048450"
"791","","",,,"Myof","false","false","","Unclustered","7.0","0","ENSMUSG00000048612"
"792","","",,,"Ctxn1","false","false","","Unclustered","5.571428571428571","0","ENSMUSG00000048644"
"795","ARCHS4 Coexpression,700;GTEx Coexpression,1329","TUSC3,TDRP,SCGN,WDR6,HMGN3,SLC16A3,ARFGEF3,CHGB,TLE2,CLUH,CHPF2,PAX6,TM4SF4,ISL1,TBC1D2,PLCB3,PKM,INF2,RFX6,MAP7D1,SCG5,ANKS6,SCG3,TKT,SCG2,PFN2,BEX4,MAGEH1,SHC2,BEX2,DLST,HIGD1A,FAM129B,ZMAT1,SH3BP1,FLNA,KLHDC2,RIC3,TMEM120B,BBS1,ACBD4,DTNA,MSN,DNAJC12,GCG,MBOAT4,SUOX,CPE,RGL3,PAM","1169","1015.0","Mterf2","false","false","","Unclustered","9.010989010989011","0","ENSMUSG00000049038"
"798","","",,,"Pls1","false","false","","Unclustered","6.236363636363636","0","ENSMUSG00000049493"
"799","","",,,"Tceal1","false","false","","Unclustered","4.0","0","ENSMUSG00000049536"
"800","","",,,"Fzd9","false","false","","Unclustered","6.236363636363636","0","ENSMUSG00000049551"
"803","","",,,"Nckap5","false","false","","Unclustered","8.681318681318682","0","ENSMUSG00000049690"
"804","","",,,"Mmp12","false","false","","Unclustered","9.12087912087912","0","ENSMUSG00000049723"
"808","","",,,"Sarm1","false","false","","Unclustered","5.333333333333333","0","ENSMUSG00000050132"
"809","","",,,"Ubqln2","false","false","","Unclustered","6.533333333333333","0","ENSMUSG00000050148"
"812","","",,,"Ccdc96","false","false","","Unclustered","4.909090909090909","0","ENSMUSG00000050677"
"817","","",,,"Vtcn1","false","false","","Unclustered","8.454545454545455","0","ENSMUSG00000051076"
"819","","",,,"Ncald","false","false","","Unclustered","6.611111111111111","0","ENSMUSG00000051359"
"829","","",,,"Brsk2","false","false","","Unclustered","5.571428571428571","0","ENSMUSG00000053046"
"830","","",,,"Adh6a","false","false","","Unclustered","6.377777777777777","0","ENSMUSG00000053054"
"832","","",,,"Arhgap20","false","false","","Unclustered","6.533333333333333","0","ENSMUSG00000053199"
"838","","",,,"Nebl","false","false","","Unclustered","5.9393939393939394","0","ENSMUSG00000053702"
"854","","",,,"Nap1l3","false","false","","Unclustered","5.5","0","ENSMUSG00000055733"
"856","","",,,"Dnaaf3","false","false","","Unclustered","5.5","0","ENSMUSG00000055809"
"857","","",,,"Izumo4","false","false","","Unclustered","3.0","0","ENSMUSG00000055862"
"858","","",,,"Triqk","false","false","","Unclustered","5.5","0","ENSMUSG00000055963"
"863","","",,,"Ccdc18","false","false","","Unclustered","4.254545454545455","0","ENSMUSG00000056531"
"864","","",,,"Dsg3","false","false","","Unclustered","5.785714285714286","0","ENSMUSG00000056632"
"870","","",,,"Lmcd1","false","false","","Unclustered","6.377777777777777","0","ENSMUSG00000057604"
"880","","",,,"Fxyd2","false","false","","Unclustered","5.0","0","ENSMUSG00000059412"
"885","","",,,"Hspa2","false","false","","Unclustered","3.7333333333333334","0","ENSMUSG00000059970"
"888","","",,,"2610008E11Rik","false","false","","Unclustered","9.615384615384615","0","ENSMUSG00000060301"
"890","","",,,"Samd5","false","false","","Unclustered","7.5636363636363635","0","ENSMUSG00000060487"
"900","","",,,"Lhfpl5","false","false","","Unclustered","5.9818181818181815","0","ENSMUSG00000062252"
"905","","",,,"Sema3e","false","false","","Unclustered","5.333333333333333","0","ENSMUSG00000063531"
"906","","",,,"Tnfrsf11b","false","false","","Unclustered","6.0","0","ENSMUSG00000063727"
"907","","",,,"S100a7a","false","false","","Unclustered","5.571428571428571","0","ENSMUSG00000063767"
"916","","",,,"Cldn9","false","false","","Unclustered","6.0","0","ENSMUSG00000066720"
"917","","",,,"Serpinb5","false","false","","Unclustered","6.377777777777777","0","ENSMUSG00000067006"
"919","","",,,"Cxx1b","false","false","","Unclustered","5.0","0","ENSMUSG00000067924"
"921","","",,,"Shroom4","false","false","","Unclustered","4.464285714285714","0","ENSMUSG00000068270"
"923","","",,,"Flnc","false","false","","Unclustered","8.836363636363636","0","ENSMUSG00000068699"
"929","","",,,"Slfn9","false","false","","Unclustered","6.611111111111111","0","ENSMUSG00000069793"
"930","","",,,"Ccdc92b","false","false","","Unclustered","5.7272727272727275","0","ENSMUSG00000069814"
"939","","",,,"Cpa2","false","false","","Unclustered","7.644444444444445","0","ENSMUSG00000071553"
"943","","",,,"Zfp9","false","false","","Unclustered","6.805555555555555","0","ENSMUSG00000072623"
"944","","",,,"Ahnak2","false","false","","Unclustered","5.5","0","ENSMUSG00000072812"
"947","","",,,"H2-Ab1","false","false","","Unclustered","9.35897435897436","0","ENSMUSG00000073421"
"948","","",,,"Il11ra1","false","false","","Unclustered","5.785714285714286","0","ENSMUSG00000073889"
"949","","",,,"Ttpa","false","false","","Unclustered","4.285714285714286","0","ENSMUSG00000073988"
"953","","",,,"Arhgap40","false","false","","Unclustered","6.533333333333333","0","ENSMUSG00000074625"
"956","","",,,"Selenos","false","false","","Unclustered","2.4000000000000004","0","ENSMUSG00000075701"
"957","","",,,"Chml","false","false","","Unclustered","5.785714285714286","0","ENSMUSG00000078185"
"960","","",,,"Sprr2a1","false","false","","Unclustered","2.7","0","ENSMUSG00000078664"
"961","","",,,"Hist3h2a","false","false","","Unclustered","5.571428571428571","0","ENSMUSG00000078851"
"964","","",,,"Slc8a3","false","false","","Unclustered","7.0","0","ENSMUSG00000079055"
"965","","",,,"St6galnac4","false","false","","Unclustered","9.12087912087912","0","ENSMUSG00000079442"
"968","","",,,"Ttbk2","false","false","","Unclustered","3.7333333333333334","0","ENSMUSG00000090100"
"975","","",,,"Gm3336","false","false","","Unclustered","3.7333333333333334","0","ENSMUSG00000095026"
"981","","",,,"Mroh6","false","false","","Unclustered","6.0","0","ENSMUSG00000098678"
"982","","",,,"Zfp383","false","false","","Unclustered","7.0","0","ENSMUSG00000099689"
"986","ARCHS4 Coexpression,690;Enrichr Queries,335;GTEx Coexpression,217","FOXA1,CHPF,DIXDC1,CELSR1,ETS1,FGFRL1,MYLK,SYDE2,TUBB6,EFEMP2,EFEMP1,PLAU,DPYSL3,SCMH1,CYP1B1,DPF3,SOX9,FADS1,HOXA5,WLS,IER3,EPM2A,EPHA4,SEMA6C,EPHA7,POSTN,WNT5B,IGFBP5,LIMCH1,FST,WNT5A,SHISA4,MITF,EML1,TPST1,SELENOM,HOXB9,LGALS12,RBP1,HOXB4,KCNQ4,HOXB3,NUPR1,HOXB8,MYL9,NRN1,PFKFB3,ARHGEF25,EPAS1,NXPH4,CACNA1A,CACNA1H,SCUBE1,INPP5A,CALD1,STC2,TSPAN2,IGFBP7,FAM83D,NGFR,JUN,TGFB2,CRTAP,RBPMS,VDR,FZD7,FN1,IGF2,FZD9,KLHL23,SSC5D,EVX1,MT3,FOSL1,EHD2,CXCL10,BHLHE40,ID4,MRVI1,AMOTL1,FERMT2,CDKN1C,NRP2,BTG2,THRB,TGFB1I1,HSPB8,FHL1,ADM,SLC2A4,JPH1,GYS1,C1QTNF1,ADAMTSL4,SGCB,BOC,TIMP3,EDN1,ANXA1,MME,DENND2A,COPZ2,ANO6,GFRA1,WNT9A,PROX1,ARL4C,ACTA2,TGFBR3,ALDH1A3,PTP4A3,NR5A2,KCNMA1,PXDN,KIT,PLEKHO1,PDE5A,SYNC,SMTNL2,ALDOA,PDZRN3,MGLL,CEBPA,TAGLN,HLF,SEMA3C,CCDC69,LAMA4,PRUNE2,FGL2,LEF1,FAM129A,CXCR4,SEMA3E,HOXD13,PTGS2,THBS1,AURKB,CLCN1,CST3,ALDH1B1,CAMK2N1,ATOH8,POLD2,SLIT1,TRIM47,SLIT2,MSX1,FLNC,IGF2BP2,TAF9B,PDLIM4,SH3BGR,RUNX1T1,EGLN1,BCHE,EGLN3,PRRX1,MDH2,TPBG,FMO4,MEIS2,DHRS3,MAPK12,KIF26B,PCDHB16,TCEA3,MSRB3,FOSB,COQ8A,TMEM229A","389","414.0","Hoxa4","false","false","","Unclustered","0.0","0","ENSMUSG00000000942"
"987","Literature ChIP-seq,30;ARCHS4 Coexpression,518;ENCODE ChIP-seq,8;Enrichr Queries,279;ReMap ChIP-seq,150;GTEx Coexpression,158","MDC1,MT-ND5,MAML2,ENO1,ABCA12,SMC4,SLC4A4,CLDN1,TSKU,SMC2,GLS,CREB3L4,MYB,NAMPT,PLCE1,CYP1B1,PIP4K2A,HOMER3,NCKAP5,IER3,GAMT,PRKCH,DAPK1,AFAP1,PDZK1,SYTL5,KNSTRN,DKK2,CLDN6,DEPDC1B,ZC2HC1A,CLDN9,JTB,HOXB3,PRR11,ASF1B,PIF1,CDCA2,PARPBP,NCAPG,PLA2G3,GALR1,ST3GAL1,S100A11,SLC19A1,SLC19A2,PLK4,CDK17,NFE2,MTERF2,PLK1,EIF2AK3,FN1,NFATC2,RMDN2,FOSL1,PKIB,PKIA,LYPD6B,FAT4,SERPINI1,PRKAG2,TMEM189,CASP14,TUBA1B,SHH,FAM102A,PBK,TCP11L2,TK1,NDC1,TEAD4,EDARADD,HELLS,RMI2,ANXA1,CLUH,ANXA3,ELOVL2,MYOF,PRSS16,PLCB3,TUBB2A,PLCB4,SLC7A8,MMP16,ANGPTL6,PXDN,CDC42EP3,CKS2,TKT,PLCB1,VAMP2,PLPPR2,PKN3,NR1I2,FAM129A,CENPA,FAM214A,PAPSS2,FAM129B,FGD2,FGD3,NEURL1B,FLNA,SC5D,RNF130,SPDEF,CDKN2D,CENPU,GABRA1,BCHE,EGLN3,CDKN2B,GUCA2B,FMO5,SULF2,CENPF,CLCF1,CENPM,FOSB,NCAPD2,TMEM229A,SLC28A1,CDKN3,TMEM229B,SLC28A3,OLFML2B,ANKRD35,GPR68,RAB3D,FAM13A,HJURP,PLOD2,RIMS2,EFEMP2,TUBB6,DEPTOR,GRB14,IYD,SLC39A6,TNFRSF8,NEK2,SLC25A45,KCNH3,IGFBP5,MITF,CDC25C,NEAT1,CASD1,SLC9A3,MELK,TNIK,OSBP2,BLM,CEMIP,TROAP,INSIG1,ITPR1,TNFRSF11B,HMMR,VTCN1,NEUROD1,IGSF21,HACL1,SRGAP1,PLXNA4,CCDC18,SDF2L1,RBPMS,OSBPL2,ZBTB10,FBXO32,CXCL10,BFSP1,GGCX,NBEA,DMXL2,CDK1,MDM2,MAFK,CNIH2,PLEKHM3,ARHGAP11A,PSCA,ITGB5,CELF3,ARRB1,FOXM1,TSPAN12,PIK3C2B,LBH,DUSP10,UPP1,ERC2,LBR,SLC37A3,SMIM14,SLC13A1,PIANP,CKAP2L,ITGA2,TNFRSF19,SPTB,ARL4C,ASPM,SLC25A15,PKM,ESPL1,BIRC5,EVL,ACPP,DTL,GAPDH,ITGA9,SLC25A13,RNF32,PLEKHH2,SEMA3C,TTK,SEMA3E,CXXC5,CXXC4,THSD4,ZNRF1,ABLIM1,P2RY2,TIFA,SLITRK6,NHS,E2F2,DNAJB9,MAL2,IGF2BP3,CACNG4,E2F8,RNF24,PLCL1,TPD52L1,PTPN13,PTPN14,P2RX4,INSM1,KCNK2,NECTIN3,VIPR1,PANK3,LDLRAD3,CBLB,MKI67,NADSYN1,SOGA1,LGALS3,CHEK2,DAG1,LONP1,TNFSF10,DZIP1L,DPF3,THSD7A,SOX9,SKP2,ACAD11,EPHB3,EPHA4,KCNK10,LIMCH1,IL1R1,KNL1,ACSL3,MFSD11,NEIL3,SOAT2,MALL,SUCLG2,GSAP,VDAC1,DNA2,KIF20B,PLPP3,CFTR,STX1A,SLC22A4,MACF1,PDE1C,SLC35D3,MGST1,PIK3R3,RACGAP1,MAP2,FAM43A,HIVEP3,ST8SIA6,KCNN4,TRAP1,TNFSF15,LRRN2,PYCR1,DCLK2,RAB27B,PM20D1,TPX2,NCEH1,MYO5C,SPATS2L,CLIC5,TMEM151B,DIRAS2,ICA1,KIF11,KIF15,HERPUD1,SLC22A15,MIS18BP1,CTSL,QSOX1,ACADM,EDN1,MRPS27,TNFRSF12A,MME,ANO6,CBFA2T3,TMEM150C,PARP8,RAD51B,UGDH,DEPDC7,KRT39,ALDOA,PDZRN3,PVT1,AMIGO2,AKR1D1,GREB1L,CXCR4,CRIP2,CST6,CRIP1,SCEL,RXRA,RAD54L,SPTSSB,SH3BGR,CAP2,GABBR2,PTGES2,GRHL3,NUDT7,KRT18,STK17B,ESYT1,SPC24,MAD2L1,MEGF9,FOXA1,SCARB1,PRDM9,CD83,ZWILCH,BUB1B,OGDHL,NR3C1,SYDE2,RGS5,SCGN,PLAU,BASP1,FAM174A,NUSAP1,CAPN2,PDE8B,PDE8A,GEN1,ZBP1,GAS2L3,SPINK1,WNT5A,NPNT,PRLR,TMEM130,TANC2,PDGFRL,DCTD,TMEM135,SIDT1,LMX1B,CARD11,TBC1D19,PLGRKT,CTTNBP2,ALOX15,SLC1A3,CACNA1C,PLD1,CPLX2,RASGRP3,CCNB2,CCNB1,ADGRG1,PODXL,ADGRG6,ISOC1,H1FX,CYC1,NXPH1,FAM83D,FAM83B,TGFB2,ACBD4,CCDC138,ARHGEF37,CAV2,ARHGEF39,HMGA1,CRIM1,HMGA2,DNAJC12,SYT8,ARHGAP32,NR4A3,UBXN11,DLG4,BAMBI,BHLHE40,NABP1,AMOTL2,AMOTL1,GALK1,PHF19,GPSM2,DOCK4,THRB,PDE3B,HMGB2,SLC2A1,HSPB1,PITPNC1,LMNB1,MFSD9,DBP,MCF2L,ARFGEF3,HIST1H1C,ABCC4,TGIF2,TBC1D8,MYRIP,MASTL,ETV5,CCNA2,HSH2D,RCN1,RBMS1,PDE5A,FBP1,LAMA5,TUFT1,DNAH5,RGS16,RSPH9,ADD3,TFPI,THBS1,AURKB,AURKA,HSPD1,NWD1,SV2A,POLD1,NT5DC3,POLD2,KLRG2,STOM,HES1,LRIG3,NCAM2,BUB1,CHGA,GALNT5,TPBG,CADPS,MEIS2,SGPP2,TICRR,CAPN13,POMC,GALM,SNTB1","96","190.5","Foxm1","false","false","","Unclustered","2.0","0","ENSMUSG00000001517"
"988","Literature ChIP-seq,48;ARCHS4 Coexpression,183;Enrichr Queries,500;GTEx Coexpression,267","MDC1,STMN3,SLC4A4,PTPDC1,GLS,CREB3L3,MYB,CYP1B1,PIP4K2A,HOMER3,HOXA5,HOXA4,CHGB,HES7,DAPK1,CACNA2D1,DNAAF1,BHLHA15,ISL1,EML1,RBP7,CLPS,HOXB9,LGALS12,TYRO3,JTB,HOXB3,GPLD1,LIPT1,SHMT1,PLA2G3,GATA4,SLCO5A1,ADAMTS15,ADH4,CRACR2B,RDH10,RHBDL3,ST3GAL1,RREB1,NKX2-2,LHPP,ZBTB7C,JAG2,PLK4,CDK17,JUN,WNT10A,PLK2,PLK1,EIF2AK3,SLC16A12,FZD9,FN1,SLC16A10,NR1D1,SLC16A13,MEX3B,ALS2CR12,FXYD2,PKIA,XKR4,FERMT2,LGMN,CDKN1C,RET,ARHGAP9,KCNC1,LPCAT1,ADM,HIF3A,JPH1,SHH,C1QTNF1,CSRP2,EFCAB1,ANXA6,TCP11L2,EMB,LEFTY1,RPS6KL1,LYPLA1,CLUH,MYBPC2,TPSG1,ROM1,WNT9B,PRSS16,SLC39A10,TMEM40,PAX6,MANEAL,BACE1,RIPPLY3,FAM222A,SLC7A8,PXDN,KCNMA1,CHST4,SMTNL2,SAMD5,PHLPP1,PKN3,HOXD13,SNX32,PTGS2,PAPSS2,FAM117A,RASSF10,IL12RB1,PKLR,BIK,MOCOS,FMO2,POU4F1,SLC8A3,CENPF,LYRM7,RIMBP2,FOSB,LGR5,NUCB2,SLC28A3,FRY,TNF,HID1,RIMS2,PYCARD,CDH2,FGF9,SLC39A6,PLXNC1,SLC25A45,SLC16A3,EPM2A,CPA2,IGFBP5,KCNH6,FST,IGFBP2,VASH2,PIPOX,OBSCN,RAB36,RAB37,SHC2,CUL7,PARM1,PFKFB3,GPR119,ILDR1,GSTT2,GMPR,GSTT1,NPAS2,NEUROD1,NEUROD2,NPTX1,NPTX2,SRGAP1,PLXNA4,BTN2A2,RASL10B,MLXIPL,CXCL10,IRAK1BP1,LHX1,MDM2,SP5,CPE,SPIRE1,RNF186,PLEKHM3,SLC25A1,PSCA,ONECUT3,NRARP,ETFA,PTPN22,FOXM1,PIK3C2B,UNC80,SGCB,BOC,IDH3B,GAL3ST2,BCAS1,PLEKHG1,KSR1,PLEKHG5,SH2D3C,BET1L,ADRA2A,PTP4A3,ESPL1,BIRC5,ITGA7,ITGA5,ST6GALNAC4,ST6GALNAC6,ALDH9A1,CEBPA,ITLN1,LRP3,AP3M2,SLC25A29,RAB23,TIFA,SLITRK6,DNAJB9,FYN,WASF1,ALOXE3,SEC11C,TRIM40,MMAB,PLCL1,IRX4,FOXJ1,KCNJ16,SYT14,SYT13,TTC39C,PTPN14,TTC39A,MYO1D,PFKL,SYT11,RAB15,ASXL3,INSM1,KCNK2,SLC25A35,SLC23A3,CPNE8,SPARC,AQP8,GFI1,AQP4,MKI67,FRAT2,CHEK2,SPATA24,LONP1,KIF21A,SOX9,KIF21B,SLC12A8,EPHA7,PAQR7,KCNK10,CTRB1,SLC11A2,ALG2,KCNK16,TM4SF4,VWA5B2,GCAT,OVOL2,CYP2U1,TRIM13,KCTD14,DNA2,CFTR,PFN2,SLC22A4,NRN1,SLC35D3,C2CD4C,PCBP3,STC2,SNX9,TRPM5,TRAP1,PTPRN2,LRRN2,REG4,SLC35E4,SLC33A1,PYCR1,NBEAL2,ACER1,MYO5B,WNK2,ID4,SPATS2L,TECPR1,CD200,ITM2C,FKBP11,PCSK1,COL18A1,NRP2,PTPRN,CITED4,DIRAS2,ICA1,DOC2B,HERPUD1,DNER,RAC3,SEC61B,FFAR1,TMED6,TMEM150A,TNFRSF12A,ANO8,SLC35G1,PROX1,TUBG2,NR5A2,KRT39,KIT,ALDOC,FJX1,VGLL3,AMER2,SLC43A1,CXCR4,CAMK2N1,RPRML,MSX1,GDF11,PTGES2,PLEKHA2,LHFPL5,VEGFC,GCG,SORBS3,GCK,TTC9,KRT18,KIF26B,QPCT,FOXA3,NEUROG3,CDK5R1,FOXA1,NARF,PRDM9,CD80,BUB1B,SDR9C7,CELSR1,ESPN,RDM1,SCGN,RGS5,BASP1,FAM3B,TEKT4,HADH,CASR,GAS2L3,SPINK1,KIRREL2,WNT5B,SLC30A2,WNT5A,SPNS2,ARID5A,SDHA,TANC2,ERN1,MYCN,DOK3,GPRIN1,SELENOP,SCG5,SIDT1,SCG3,LMX1B,SCG2,UBA5,NXPH4,ALOX15,CACNA1A,ARHGAP18,NDRG2,FUT1,NID2,CACNA1H,CAMSAP2,PCSK1N,H1FX,NXPH1,WNT3,ASIC1,PRNP,CBX6,CCDC138,TRPV2,HMGA1,HMGA2,EVX1,KLHL23,SYT7,BMP6,AHI1,DAP,BMP2,PLCXD3,NAT8,FEV,BHLHE40,LRP11,PNLIPRP1,PLEK,SLC2A1,SLC2A2,LAMC2,SLC2A4,SOBP,GRM4,BDKRB2,ARFGEF3,HIST1H1C,ABCC8,MARS2,OLIG1,ETV4,SYNGR4,SSTR3,UPK3A,ETV5,TGFBR3,ACTA2,ALDH1A3,VGF,COL6A1,RGS14,PLA2G1B,REP15,LEF1,SLC3A1,AURKB,RASD1,SV2A,POLD1,SPOCK2,GNA11,POLD2,NT5DC3,SLIT1,HES1,HES2,CHGA,BNIP3,PDX1,ARID3A,SUOX,MEIS2,MAPK13,TICRR,SLC4A7,UFM1,XPNPEP1,PIK3IP1,CHPT1,SNTB1","164","249.5","Mnx1","false","false","","Unclustered","3.238095238095238","0","ENSMUSG00000001566"
"989","Literature ChIP-seq,51;ARCHS4 Coexpression,178;Enrichr Queries,160;ReMap ChIP-seq,202;GTEx Coexpression,96","MT-ND5,ENO1,CLDN2,TSKU,LIPE,EPSTI1,PIP4K2A,CYP1B1,NCKAP5,WLS,IER3,TRIQK,DAPK2,RNASE4,PRKCA,RNASE1,SYTL3,RBP7,RBP4,RNF125,MYL7,WDR81,MAP1B,LGALS12,SERPING1,ACOT4,LIPT1,RETSAT,SHMT1,CFI,ABCB9,LDHA,CRACR2B,PRKAR2B,AGMO,TTPA,SLC19A3,ST3GAL4,HMOX1,SLC19A2,NFE2,JUN,FZD4,TIPARP,FN1,H2AFY2,LGMN,BTG2,PHF1,ADM,PYGL,PEAR1,JPH1,SULT1C2,TUBA1B,TUBA1A,TMEM44,TIMP2,TIMP3,TK1,RPS6KL1,ARG2,ANXA1,ELMOD3,ELOVL6,TMEM173,TMEM37,MMP11,NCOR1,SLC7A7,MRAS,OAF,RILPL1,PLSCR4,PXDN,CKS2,PLEKHO1,PLEKHO2,TKT,MGLL,GRAMD1A,PKN3,DLST,PTGS2,PAPSS2,FGD3,UCP2,SC5D,CKB,RNF130,GSN,GLYCTK,BMP8B,NR1H3,FMO1,FMO2,GPR4,FMO4,POU4F1,DHRS3,AGT,PSMB9,SPSB1,LPCAT3,FOSB,CCL28,CRLF1,YPEL3,SLC28A3,OLFML2B,NRROS,CSF1,GPR68,CLU,HPGDS,FCGRT,SLCO2B1,SESN1,NEK1,SLC25A45,SLC16A3,FADS1,PLS1,SEMA6B,MYLIP,SEMA6D,IGFBP2,MITF,NEAT1,CACNB3,MELK,MADD,S100A6,KANK3,LY6E,BRSK1,PFKFB4,CEMIP,PFKFB3,INSIG1,LY96,TNFRSF11B,AK4,RLF,RAP1GAP,HACL1,TNFRSF14,SDF2L1,ANKRD22,FBXO32,ADAP1,MLXIPL,CXCL10,PTPRB,SLC25A1,ITGAM,CDCA7L,APIP,ARRB1,SCRN1,PGM2,ACP5,UPP1,LBR,SLC36A1,PLEKHG1,SGIP1,FAM219A,ADRA2A,PTP4A3,PKM,LCK,BMP2K,ACPP,CEBPA,ACSS2,FGL2,SEMA3G,CXXC5,SELENBP1,AP3M2,P2RY2,TIFA,DNAJB9,D2HGDH,FSD1,IGF2BP2,LYSMD2,MERTK,SORL1,P2RX4,OCIAD2,KCNK2,CPNE8,IL1RN,IFITM1,SPARC,FAM89A,PANK1,ACSM5,CBLB,IFI30,IFIT3,ICAM1,LGALS3,CHEK2,TNFSF10,LONP1,MFSD2A,PDK1,PAQR7,RSAD2,P3H1,ACSL3,CYP39A1,CYP27A1,PPP1R3C,SOAT2,KCTD14,KCNQ4,KCTD12,KIF20B,PLPP3,NRN1,RWDD2A,EPAS1,TSHZ2,MGST1,CD79B,TSPAN4,SARAF,KCNN4,SNX8,DECR1,DTNA,REG4,CIDEA,DCLK2,MYO5A,PYCR2,CIDEC,PARP12,GADD45G,NCEH1,RGL1,ITM2C,FKBP11,NRP2,CD40,ECM1,SLC35F2,ZFAND2A,CITED4,SLC7A11,GLIPR1,CTSL,CTSK,CD38,RAC3,EDN1,MME,TNFRSF12A,ANO8,RENBP,ALDOC,TLR6,ALDOA,TLR2,NAPB,C1QA,SLC43A3,AKR1D1,CXCR4,ZDHHC21,CAPG,PHYHIP,RASIP1,STX11,RXRA,HSF2,CBR3,SLC31A2,PLEKHA2,LHFPL2,LYVE1,GCK,RIT1,GPAM,PCDHB16,ESYT1,RTN4IP1,CD68,KLB,SCARB1,CD83,CPOX,GXYLT2,GIMAP6,ETS1,GIMAP8,KIF5C,PLAU,BASP1,FAM3B,SBF2,TGM2,GAS2L3,G6PC,CD93,CYBB,TMEM135,COL4A2,COL4A1,GPD1,SELENOP,NUPR1,ABCG1,NPR1,ARHGAP19,LPL,SLC1A3,NDRG2,PLD1,ACACB,NID2,NDRG1,ACACA,CALHM2,DPP7,H1FX,VARS2,PACSIN1,PRNP,CAV2,VDR,CRIM1,TRPV2,INHBB,BMP6,EFNA1,ISG20,AHI1,BMP2,PQLC3,BHLHE40,EBPL,AMOTL1,MXD4,ABCD4,DOCK4,ACADVL,PODXL2,PLEK,SLC2A1,HSPB1,SLC2A2,DBI,SLC2A6,HK2,HEBP2,ALDH2,CASP1,ABCD1,EGFL7,MMP7,ARHGEF15,ATP6AP1,PLAUR,TBC1D8,OLIG1,GPCPD1,KLF15,SPIDR,ACTA2,FGR,HSH2D,TBC1D2,IRF1,CAT,ADGRF5,ALDH1A1,ATP6V1B2,FBP1,LAMA4,RGS16,THBS1,AURKB,POLD2,STOM,BNIP3,LIMK1,MAPK13,SLC4A7,COL7A1,CHPT1","59","137.4","Nr1h3","false","false","","Unclustered","1.6666666666666667","11","ENSMUSG00000002108"
"990","","",,,"Lipe","false","false","","Unclustered","0.4","3","ENSMUSG00000003123"
"992","","",,,"Arg2","false","false","","Unclustered","6.805555555555555","0","ENSMUSG00000021125"
"994","ARCHS4 Coexpression,85;GTEx Coexpression,200","RAB3C,TUSC3,STMN3,ABAT,FBXO21,RIMS2,NUDT10,SYNPR,KIF5C,TMOD2,SERPINF2,CASD1,CPT1C,TMEM130,HPCAL4,RUNDC3A,MTURN,MAPK8IP1,EML5,OLFM1,MAP1A,SCG2,TSPYL4,BEX4,BEX3,BRSK1,BEX2,NDRG4,ARL3,STXBP1,ARX,HPCA,CPLX2,TTBK1,RAP1GAP,CAMSAP2,MAP2,SARAF,MAP6,NXPH1,KIF3C,SCN3A,RAB6B,MAP9,RAB11FIP4,SPTBN2,PACSIN1,SYT5,TCAF1,FZD3,PTPRN2,MAGEE1,LRRN3,ST8SIA3,IGF2,MYO5A,SYT7,GNAO1,ARHGAP32,PEX5L,GNAL,NBEA,KLHDC8A,DLG4,ZBTB8B,CD200,DNAL1,SCN2B,SNAP25,TMEM151B,PODXL2,TENM4,PTPRN,RASGRF1,DIRAS2,GRIK4,CELF6,SYNE1,UNC80,JPH4,PCLO,CAMKV,SLC22A17,DNER,IDS,KIF1A,ERC2,SULT4A1,PSD,PIANP,SLC2A13,MANEAL,SYP,SYN2,SYN1,DNM1,ANO3,KCNMA1,HAP1,MAPT,RAPGEF5,PLCB1,VAMP2,SHANK2,RAPGEF4,CAMK2B,NAPB,MAGEH1,HLF,KCNA1,CRMP1,CXXC4,PHYHIP,DDN,GNG4,SV2A,CAMK2N1,CCDC184,GABBR2,GABRA1,ARNT2,ECEL1,CADPS,NAP1L3,SYT16,LHFPL4,NMNAT2,SEMA4G,GRIN1,STXBP5L,TTLL7,SLC4A8,TTC8,FMNL2,ABI2,MORN4,SYT11,APBA1,ATXN10","65","142.5","Peg3","false","false","","Unclustered","2.0","0","ENSMUSG00000002265"
"995","","",,,"Zim1","false","false","","Unclustered","4.0","0","ENSMUSG00000002266"
"999","","",,,"Ctns","false","false","","Unclustered","2.0","0","ENSMUSG00000005949"
"1000","","",,,"Shpk","false","false","","Unclustered","4.0","0","ENSMUSG00000005951"
"1005","","",,,"Krt10","false","false","","Unclustered","7.644444444444445","0","ENSMUSG00000019761"
"1007","","",,,"Wasf1","false","false","","Unclustered","6.0","0","ENSMUSG00000019831"
"1008","","",,,"Fam64a","false","false","","Unclustered","7.418181818181818","0","ENSMUSG00000020808"
"1010","","",,,"Epsti1","false","false","","Unclustered","4.523809523809524","0","ENSMUSG00000022014"
"1011","","",,,"Nefm","false","false","","Unclustered","2.4000000000000004","0","ENSMUSG00000022054"
"1017","","",,,"Pnliprp2","false","false","","Unclustered","7.0","0","ENSMUSG00000025091"
"1018","","",,,"Fgf14","false","false","","Unclustered","4.761904761904762","0","ENSMUSG00000025551"
"1019","","",,,"Pam","false","false","","Unclustered","5.833333333333334","0","ENSMUSG00000026335"
"1023","","",,,"Lrrc26","false","false","","Unclustered","2.7","0","ENSMUSG00000026961"
"1025","","",,,"Snap25","false","false","","Unclustered","7.822222222222222","0","ENSMUSG00000027273"
"1026","","",,,"Pmvk","false","false","","Unclustered","6.805555555555555","0","ENSMUSG00000027952"
"1027","","",,,"Gipr","false","false","","Unclustered","6.805555555555555","0","ENSMUSG00000030406"
"1028","","",,,"Mt3","false","false","","Unclustered","8.307692307692308","0","ENSMUSG00000031760"
"1030","","",,,"Celf6","false","false","","Unclustered","6.805555555555555","0","ENSMUSG00000032297"
"1035","","",,,"Dsg1c","false","false","","Unclustered","7.0","0","ENSMUSG00000034774"
"1037","","",,,"Rims4","false","false","","Unclustered","7.418181818181818","0","ENSMUSG00000035226"
"1039","","",,,"Fbxl21","false","false","","Unclustered","7.5636363636363635","0","ENSMUSG00000035509"
"1040","","",,,"Ky","false","false","","Unclustered","7.7142857142857135","0","ENSMUSG00000035606"
"1042","","",,,"Wee2","false","false","","Unclustered","9.696969696969697","0","ENSMUSG00000037159"
"1043","","",,,"Slc25a43","false","false","","Unclustered","7.0","0","ENSMUSG00000037636"
"1047","","",,,"4932438H23Rik","false","false","","Unclustered","7.5636363636363635","0","ENSMUSG00000039851"
"1052","","",,,"Slc16a13","false","false","","Unclustered","7.644444444444445","0","ENSMUSG00000044367"
"1054","","",,,"Tmem252","false","false","","Unclustered","5.833333333333334","0","ENSMUSG00000048572"
"1055","","",,,"Plcxd3","false","false","","Unclustered","6.533333333333333","0","ENSMUSG00000049148"
"1056","","",,,"Abca12","false","false","","Unclustered","8.318181818181818","0","ENSMUSG00000050296"
"1058","","",,,"Plcb1","false","false","","Unclustered","6.1090909090909085","0","ENSMUSG00000051177"
"1060","","",,,"Spock2","false","false","","Unclustered","6.533333333333333","0","ENSMUSG00000058297"
"1062","","",,,"Kcnh7","false","false","","Unclustered","6.533333333333333","0","ENSMUSG00000059742"
"1063","","",,,"Fam195b","false","false","","Unclustered","7.0","0","ENSMUSG00000061111"
"1067","","",,,"Cxx1a","false","false","","Unclustered","7.0","0","ENSMUSG00000067925"
"1072","","",,,"Gal3st2","false","false","","Unclustered","5.785714285714286","0","ENSMUSG00000094651"
"1077","","",,,"Sult4a1","false","false","","Unclustered","6.805555555555555","0","ENSMUSG00000018865"
"1078","","",,,"Agr2","false","false","","Unclustered","5.2","0","ENSMUSG00000020581"
"1080","","",,,"Lgmn","false","false","","Unclustered","6.236363636363636","0","ENSMUSG00000021190"
"1088","","",,,"Kcnu1","false","false","","Unclustered","6.236363636363636","0","ENSMUSG00000031576"
"1090","","",,,"Bzrap1","false","false","","Unclustered","6.377777777777777","0","ENSMUSG00000034156"
"1092","","",,,"Ppp1r16b","false","false","","Unclustered","6.611111111111111","0","ENSMUSG00000037754"
"1097","","",,,"Abcb1a","false","false","","Unclustered","6.1090909090909085","0","ENSMUSG00000040584"
"1103","","",,,"Mapk11","false","false","","Unclustered","5.2","0","ENSMUSG00000053137"
"1104","","",,,"Tmem62","false","false","","Unclustered","2.888888888888889","0","ENSMUSG00000054484"
"1111","","",,,"Nab2","false","false","","Unclustered","0.2857142857142857","0","ENSMUSG00000025402"
"1112","","",,,"Acaca","false","false","","Unclustered","2.4000000000000004","0","ENSMUSG00000020532"
"1114","","",,,"Gck","false","false","","Unclustered","6.377777777777777","0","ENSMUSG00000041798"
"1116","ARCHS4 Coexpression,1575;Enrichr Queries,975;GTEx Coexpression,522","FOXA1,SPON2,SCARB1,GFI1,PLAT,OTP,CELSR1,CREB3L4,LONP1,CYP1B1,SOX9,HOXA5,MNX1,HOXA4,SEMA6A,DNAAF3,FST,WNT5A,ISL1,HDHD3,PRLR,ERN1,POR,HOXB9,GPRIN1,HOXB3,MGARP,LMX1B,HOXB8,NBL1,NRN1,PFKFB3,CACNA1A,FBLN1,GATA4,NEUROD1,NEUROD2,TKFC,RDH11,NPTX1,CPA6,WNT3,NGFR,SMCP,MYH7B,GSTM2,IGF2,RMDN2,TRERF1,ACSF2,CXCL10,MAP3K15,MEX3B,LHX1,FEV,BHLHE40,FAM187B,ID4,SP5,PYROXD2,ACADVL,NRARP,SHH,UPK1B,ABCC4,EDN1,LMNTD2,PAX6,PROX1,UPK3A,ALDH1A3,PTP4A3,NR5A2,IRF1,PXDN,RGN,ACPP,MATN2,HCN4,SLC47A1,LEF1,HOXD13,BARX2,AURKB,HSPD1,ASPDH,RBBP7,MSX1,FLNC,SPDEF,JAZF1,KCNJ5,EGLN3,IRX4,ARID3A,TMCO4,SLC8B1,POU4F1,MEIS2,CYP2W1,COL7A1,SERHL,AGBL3,GALM,ASB4,INSM1","1182","1024.0","Evx1","false","false","","Unclustered","0.14285714285714285","0","ENSMUSG00000005503"
"1118","","",,,"Cd38","false","false","","Unclustered","6.236363636363636","0","ENSMUSG00000029084"
"1124","","",,,"Cbfa2t3","false","false","","Unclustered","0.6666666666666666","0","ENSMUSG00000006362"
"1126","","",,,"Spata6","false","false","","Unclustered","7.822222222222222","0","ENSMUSG00000034401"
"1127","","",,,"Rgs4","false","false","","Unclustered","7.0","0","ENSMUSG00000038530"
"1128","ARCHS4 Coexpression,1023;GTEx Coexpression,277","MDC1,NRP2,ACADVL,TGFB1I1,HSPB8,FHL1,DIXDC1,LDB3,SOGA1,TTC28,MYLK,SYDE2,DPYSL3,RNF150,CD53,SEMA6C,EPHA7,DUSP3,PCYT2,CLUH,AFAP1,SLC39A13,ANO6,FBXO10,HSPG2,EML1,TMEM252,ENAH,SELENOM,OBSCN,SETBP1,COL4A2,DMWD,KCNMA1,ITGA7,KCNQ4,PLEKHO1,PDE5A,MXRA7,MYL9,PDZRN3,ITGA9,HCN4,RASL12,TAGLN,CUL7,ARHGEF25,CCDC69,PRUNE2,FAM129A,FOXO6,CACNA1C,CACNA1H,ACACA,NEURL1B,INPP5A,ALDH1B1,CALD1,RAB23,TCEAL1,NT5DC3,ST3GAL4,FLNA,TSPAN2,RAB11FIP5,SMCP,MYH7B,SLC12A4,RBPMS,FZD7,KLHL23,SORBS3,REEP1,WNK2,TCEA3,FAM187B,PDE3A,MSRB3,MRVI1,MAFK,ACO2,AMOTL1,COQ8A,RAMP1,FERMT2","746","650.0","Scmh1","false","false","","Unclustered","8.672727272727272","0","ENSMUSG00000000085"
"1132","","",,,"Tpd52l1","false","false","","Unclustered","3.0","0","ENSMUSG00000000296"
"1133","","",,,"Egfl6","false","false","","Unclustered","6.0","0","ENSMUSG00000000402"
"1134","","",,,"Lck","false","false","","Unclustered","4.761904761904762","0","ENSMUSG00000000409"
"1135","","",,,"Cttnbp2","false","false","","Unclustered","5.785714285714286","0","ENSMUSG00000000416"
"1136","","",,,"Hk2","false","false","","Unclustered","6.611111111111111","0","ENSMUSG00000000628"
"1140","","",,,"Dlg3","false","false","","Unclustered","2.4000000000000004","0","ENSMUSG00000000881"
"1141","","",,,"Slc7a7","false","false","","Unclustered","6.236363636363636","0","ENSMUSG00000000958"
"1143","","",,,"S100a6","false","false","","Unclustered","7.0","0","ENSMUSG00000001025"
"1146","","",,,"Sema6b","false","false","","Unclustered","7.5636363636363635","0","ENSMUSG00000001227"
"1147","","",,,"Ckb","false","false","","Unclustered","4.464285714285714","0","ENSMUSG00000001270"
"1148","","",,,"Sync","false","false","","Unclustered","6.533333333333333","0","ENSMUSG00000001333"
"1149","","",,,"Slc19a1","false","false","","Unclustered","6.611111111111111","0","ENSMUSG00000001436"
"1151","","",,,"Tcea3","false","false","","Unclustered","4.761904761904762","0","ENSMUSG00000001604"
"1152","","",,,"Gstt1","false","false","","Unclustered","8.50909090909091","0","ENSMUSG00000001663"
"1153","","",,,"Gstt3","false","false","","Unclustered","3.7333333333333334","0","ENSMUSG00000001665"
"1154","","",,,"Cldn15","false","false","","Unclustered","5.0","0","ENSMUSG00000001739"
"1155","","",,,"Lrp3","false","false","","Unclustered","4.761904761904762","0","ENSMUSG00000001802"
"1158","","",,,"Esam","false","false","","Unclustered","5.0","0","ENSMUSG00000001946"
"1159","","",,,"Pdzd4","false","false","","Unclustered","4.523809523809524","0","ENSMUSG00000002006"
"1160","","",,,"Slc39a13","false","false","","Unclustered","7.822222222222222","0","ENSMUSG00000002105"
"1162","","",,,"Ncan","false","false","","Unclustered","2.0","0","ENSMUSG00000002341"
"1163","","",,,"Snx9","false","false","","Unclustered","7.2727272727272725","0","ENSMUSG00000002365"
"1164","","",,,"Bmp8b","false","false","","Unclustered","8.0","0","ENSMUSG00000002384"
"1165","","",,,"Slc9a3r2","false","false","","Unclustered","6.377777777777777","0","ENSMUSG00000002504"
"1166","","",,,"Tmem143","false","false","","Unclustered","1.6666666666666667","0","ENSMUSG00000002781"
"1167","","",,,"Pla1a","false","false","","Unclustered","9.742857142857142","0","ENSMUSG00000002847"
"1169","","",,,"Car11","false","false","","Unclustered","6.805555555555555","0","ENSMUSG00000003273"
"1171","","",,,"Fkbp11","false","false","","Unclustered","8.307692307692308","0","ENSMUSG00000003355"
"1172","","",,,"St8sia6","false","false","","Unclustered","5.785714285714286","0","ENSMUSG00000003418"
"1174","","",,,"Slc25a1","false","false","","Unclustered","7.425","0","ENSMUSG00000003528"
"1175","","",,,"Homer3","false","false","","Unclustered","4.464285714285714","0","ENSMUSG00000003573"
"1176","","",,,"Gstm3","false","false","","Unclustered","7.418181818181818","0","ENSMUSG00000004038"
"1177","","",,,"Col26a1","false","false","","Unclustered","8.672727272727272","0","ENSMUSG00000004415"
"1178","","",,,"Psg17","false","false","","Unclustered","5.0","0","ENSMUSG00000004540"
"1180","","",,,"Ghrhr","false","false","","Unclustered","6.0","0","ENSMUSG00000004654"
"1183","","",,,"Dnah2","false","false","","Unclustered","4.761904761904762","0","ENSMUSG00000005237"
"1185","","",,,"Pafah1b3","false","false","","Unclustered","6.533333333333333","0","ENSMUSG00000005447"
"1187","","",,,"Atp4a","false","false","","Unclustered","6.0","0","ENSMUSG00000005553"
"1188","","",,,"Kit","false","false","","Unclustered","7.5636363636363635","0","ENSMUSG00000005672"
"1189","","",,,"Trap1","false","false","","Unclustered","8.318181818181818","0","ENSMUSG00000005981"
"1190","","",,,"Susd2","false","false","","Unclustered","6.805555555555555","0","ENSMUSG00000006342"
"1192","","",,,"Gcat","false","false","","Unclustered","6.611111111111111","0","ENSMUSG00000006378"
"1193","","",,,"Nectin4","false","false","","Unclustered","6.0","0","ENSMUSG00000006411"
"1194","","",,,"Cryba2","false","false","","Unclustered","7.822222222222222","0","ENSMUSG00000006546"
"1196","","",,,"Runx1t1","false","false","","Unclustered","6.533333333333333","0","ENSMUSG00000006586"
"1197","","",,,"P4htm","false","false","","Unclustered","6.236363636363636","0","ENSMUSG00000006675"
"1199","","",,,"Ddah2","false","false","","Unclustered","1.6666666666666667","3","ENSMUSG00000007039"
"1201","","",,,"Abhd8","false","false","","Unclustered","5.785714285714286","0","ENSMUSG00000007950"
"1205","","",,,"Slc16a12","false","false","","Unclustered","5.5","0","ENSMUSG00000009378"
"1210","","",,,"Apol7a","false","false","","Unclustered","6.611111111111111","0","ENSMUSG00000010601"
"1211","","",,,"Acaa1b","false","false","","Unclustered","5.571428571428571","0","ENSMUSG00000010651"
"1213","","",,,"Gabra1","false","false","","Unclustered","5.0","0","ENSMUSG00000010803"
"1216","","",,,"Fsd1","false","false","","Unclustered","8.076923076923077","0","ENSMUSG00000011589"
"1217","","",,,"Aim1l","false","false","","Unclustered","6.0","0","ENSMUSG00000012123"
"1218","","",,,"Kif11","false","false","","Unclustered","7.5636363636363635","0","ENSMUSG00000012443"
"1219","","",,,"2200002J24Rik","false","false","","Unclustered","7.0","0","ENSMUSG00000013083"
"1221","","",,,"Pea15a","false","false","","Unclustered","8.0","0","ENSMUSG00000013698"
"1222","","",,,"Clip3","false","false","","Unclustered","4.0","0","ENSMUSG00000013921"
"1225","","",,,"Aldh1a3","false","false","","Unclustered","6.611111111111111","0","ENSMUSG00000015134"
"1228","","",,,"Cybb","false","false","","Unclustered","5.785714285714286","0","ENSMUSG00000015340"
"1229","","",,,"Xk","false","false","","Unclustered","6.805555555555555","0","ENSMUSG00000015342"
"1230","","",,,"Tmem27","false","false","","Unclustered","7.0","0","ENSMUSG00000015401"
"1231","","",,,"Ace2","false","false","","Unclustered","5.0","0","ENSMUSG00000015405"
"1234","","",,,"Pls3","false","false","","Unclustered","6.805555555555555","0","ENSMUSG00000016382"
"1237","","",,,"Zpbp2","false","false","","Unclustered","7.2727272727272725","0","ENSMUSG00000017195"
"1238","","",,,"Gsdma2","false","false","","Unclustered","4.027777777777778","0","ENSMUSG00000017211"
"1240","","",,,"Zfp334","false","false","","Unclustered","4.761904761904762","0","ENSMUSG00000017667"
"1241","ARCHS4 Coexpression,1;ENCODE ChIP-seq,9;Enrichr Queries,71;ReMap ChIP-seq,2;GTEx Coexpression,2","ABAT,SLC4A4,TMEM92,TSKU,ZC3H12D,SAMD14,GJA1,CREB3L3,CREB3L4,MYB,MS4A10,NCKAP5,XYLB,HOXA4,IER3,GAMT,SERPINF2,BHLHA15,PDZK1,PRAP1,HSPG2,ISL1,CLDN6,ACE2,HOXB9,RBP2,WDR81,CLDN9,TFR2,LGALS12,JTB,ENPEP,ABCB6,RETSAT,GATA4,SLC5A1,HSD11B2,GUCD1,CRACR2B,KCNQ1OT1,HMOX1,RREB1,PPARGC1A,GSTM4,PRELID2,CDK18,NFE2,JUN,FZD5,FN1,NFATC3,FZD9,NR1D1,NR0B2,A1CF,FOSL1,SULT1B1,CYP1A1,DENND1C,PIGR,BTG2,TGFB1I1,ADM,PYGL,LRRC31,MMP20,SLC6A4,ADAMTSL4,IMPA2,TK1,RMI2,DUSP3,ANXA1,TPSG1,ANXA3,IFNGR1,PAX4,TMC8,F2,SLC39A14,GCHFR,TMEM37,PLCB3,FAM222A,INF2,SLC7A7,MMP16,BDH1,OAF,MMP15,PXDN,DPYD,ADSSL1,RGN,PPARA,CRYAB,VAMP2,PHLPP2,GRAMD1A,OAT,ECHS1,NR1I3,NR1I2,SNX33,AFP,PTGS2,PAPSS2,NEURL1B,AGR2,RUNX1T1,BCHE,AOC1,EGLN3,CDKN2B,PKLR,F10,GLYCTK,MOCOS,GUCA2B,NR1H3,FMO4,GUCA2A,DHRS3,AGT,AGMAT,FABP1,SPSB2,COL3A1,AADAC,FOSB,SLC28A2,SLC28A1,CRLF1,YPEL3,HSPA1B,NAB2,PLOD2,RORA,CLU,DACH1,CHP2,NEK2,PLXNC1,SLC25A45,SLC16A3,PLS1,SLC16A5,SLC15A1,PCYT2,SEMA6A,DGAT1,KCNH6,DIO1,PIPOX,MITF,ATP11A,NEAT1,OLFM4,ACAP3,SLC9A3,RAB36,IGFALS,AJUBA,SQSTM1,SLC27A2,SLC27A5,REG3A,SHC2,TNFRSF11A,NPAS2,ACAT2,RAP1GAP,GIMD1,TKFC,NACC2,SLC4A11,CORO2A,ADAP1,MLXIPL,CXCL10,GGCX,MDM2,SP5,MAFK,ACO2,REEP6,SLC26A3,SLC25A1,KCNK5,LEAP2,ETFA,KBTBD13,UGT2A3,SLC37A4,GAL3ST2,BOK,SLC13A1,SMIM14,SLC36A1,SLC13A2,PLA2G12B,ITGA2,APOA1,APOA4,NIPSNAP1,SLC25A15,PTP4A3,TFDP2,MEP1A,LCT,GAPDH,SMIM24,CEBPA,SEC23A,SLC47A1,LRP1,CCDC68,ITLN1,CXXC5,BPHL,ABLIM1,DCAF17,TRIM47,IGF2BP3,IGF2BP2,BCO1,LRRC8E,TRIM40,MMAB,APOC3,SEMA4G,CPPED1,TM6SF2,MYO1D,MYO1A,GLOD5,TRIM35,TRIM31,PPP1R14D,SLC23A3,VIPR1,FAM89B,PANK1,SLC23A1,DIXDC1,SOGA1,IKZF4,CISD3,ICAM1,CHEK2,TNFSF10,KIF21A,SOX9,TMEM88B,EPHA4,SLC6A19,EPHA7,PAQR7,IL1R1,ENTPD8,ACSL5,TM4SF5,SLC51A,KNL1,CMBL,SLC51B,GCAT,CYP27A1,POR,KATNAL1,SOAT2,MALL,SUCLG2,VDAC1,NBL1,CFTR,MAOB,MAOA,EPAS1,SMIM1,MTTP,MGST1,PCBP4,TSPAN4,TRPM5,BBS1,REG4,PYCR1,PTK6,VNN1,MYO5B,SPATS2L,KYAT1,COL9A3,CLIC5,TMEM151B,DHRS11,ACY1,MOGAT2,SLC7A11,PTPRH,PCSK5,CLYBL,KHK,ROBO1,HNF4A,ACADM,TINAG,ACADS,PSD,CBR1,EDN1,TMEM150A,TNFRSF12A,MME,ANO9,SLC35G1,TUBG2,PROX1,UGDH,NR5A2,CLDN15,TFF3,ALDOB,MATN2,HAAO,SLC43A1,CRIP2,CRIP1,CST3,RXRA,CAMK2N1,TM4SF20,RAD54L,EMC9,SORBS2,ETNPPL,CYP2W1,KRT18,XK,PCDHB16,GSTA1,TCEA2,FOXA3,OTC,FOXA1,SCARB1,FCGBP,ACAA2,GDA,JADE2,NR3C1,CELSR1,ETS1,PLB1,FAM3B,GGT1,SBF2,PDE8A,ENPP7,SPINK4,SCARA3,UNC5CL,G6PC,SPINK1,ANXA13,MUC3A,GLTPD2,TMEM135,DOK4,TMEM139,SELENOP,GPD1,ABCG2,RASL12,SLC1A1,PROZ,ARHGAP18,FBLN1,NDRG1,PDZD3,SCIN,ADGRG7,NLRP6,ALDH3B1,ADGRG6,ISOC1,TBC1D14,H1FX,MGAM,TCAF1,ACBD4,VDR,EPHX2,INHBC,ACSF2,COQ5,EFNA1,BMP2,DAO,TMEM236,BHLHE40,CRYL1,ALPI,FGFR4,GALK1,THRB,TREH,SLC2A2,LAMC2,SLC2A5,CASP7,ALDH2,SUN2,KLF12,MMP7,URAD,LMNTD2,ETV1,ETV4,KLF15,UPK3A,PRODH2,ETV5,GIP,SSTR5,DDAH2,IRF1,ALDH1A1,RBMS1,CDHR5,FBP1,LAMA5,LEF1,SLC3A1,ATP1A1,THBS1,AURKB,AURKA,HSPD1,MUC2,GNG4,GNA11,ERICH4,ERBB2,BPNT1,HES1,SLIT2,ATOH1,FAHD1,ARID3A,MEIS2,CAPN13,XPNPEP2,COL7A1,SARDH,AQP11,CHPT1,SNTB1,ASB1","4","17.0","Hnf4g","false","false","","Unclustered","6.0","0","ENSMUSG00000017688"
"1242","","",,,"Slc12a4","false","false","","Unclustered","8.307692307692308","0","ENSMUSG00000017765"
"1245","","",,,"Mfng","false","false","","Unclustered","7.0","0","ENSMUSG00000018169"
"1248","ARCHS4 Coexpression,1007;Enrichr Queries,1;GTEx Coexpression,1366","IFITM1,ZFAND4,CELSR1,MKI67,ESPN,CLU,CELSR3,TUBB6,GRB14,KIF5C,CHEK2,PALM,MYB,CCDC96,LONP1,CYP1B1,SOX9,SLC16A3,FADS1,IER3,TLE2,PCYT2,DGAT2,SEMA6A,IGFBP5,FST,IGFBP2,ENTPD8,COX6B2,ZC2HC1C,SLC9A3,MYCN,SOAT2,LGALS12,S100A6,SLC27A2,ASF1B,EPAS1,ABHD1,CACNA1A,LPL,FOXO6,HMMR,NDRG2,NDRG1,CACNA1H,RAP1GAP,HSD11B2,CCNB1,PDZD3,STC2,HMOX1,NPTX2,RAB11FIP5,PACSIN1,NGFR,MYH7B,SMCP,JUN,CCDC136,EPHX2,PLK1,FN1,FZD9,HSPA2,CORO2A,SYT7,GADD45G,EFNA1,TPX2,MLXIPL,CXCL10,MYO5C,BHLHE40,FAM187B,CDK1,REEP6,PRR36,ITM2C,KCNK5,RET,CITED4,HMGB2,ATP2A3,HSPB1,NRARP,ADM,KIF11,SLC2A4,WFDC2,CSRP2,IMPA2,TK1,KIF1A,IZUMO4,ANXA1,CLUH,ELOVL2,ANO9,IQCD,REXO2,SYNGR4,ETV4,KLF15,CCNA2,ASPM,PTP4A3,PLCB3,VGF,MMP15,ZPBP2,PXDN,KIT,BIRC5,ALDOC,CDHR5,MAPT,CAMK2B,RNF32,TAGLN,RGS16,LEF1,CXCR4,CRIP2,THBS1,AURKB,AURKA,SELENBP1,RASD2,RASD1,CAMK2N1,GNA11,E2F2,MAL2,CKB,FLNC,EGLN3,GSN,MOCOS,FMO4,SORL1,SORBS3,DHRS3,MAPK13,CENPF,KRT18,MYO1A,TCEA3,PCDHB16,RIMBP3,CRLF1,BRDT,CDKN3","919","791.3","Ybx2","false","false","","Unclustered","6.236363636363636","0","ENSMUSG00000018554"
"1249","","",,,"Mmp20","false","false","","Unclustered","5.785714285714286","0","ENSMUSG00000018620"
"1253","","",,,"Pank3","false","false","","Unclustered","6.611111111111111","0","ENSMUSG00000018846"
"1254","","",,,"Otop3","false","false","","Unclustered","4.0","0","ENSMUSG00000018862"
"1256","","",,,"Tm4sf5","false","false","","Unclustered","7.418181818181818","0","ENSMUSG00000018919"
"1257","","",,,"Alox15","false","false","","Unclustered","5.0","0","ENSMUSG00000018924"
"1258","","",,,"Rab3d","false","false","","Unclustered","6.533333333333333","0","ENSMUSG00000019066"
"1259","","",,,"Scrn1","false","false","","Unclustered","7.0","0","ENSMUSG00000019124"
"1262","","",,,"Gdpd2","false","false","","Unclustered","5.0","0","ENSMUSG00000019359"
"1265","","",,,"Fyn","false","false","","Unclustered","8.672727272727272","0","ENSMUSG00000019843"
"1266","","",,,"Pkib","false","false","","Unclustered","7.644444444444445","0","ENSMUSG00000019876"
"1267","","",,,"Serinc1","false","false","","Unclustered","5.5","0","ENSMUSG00000019877"
"1268","","",,,"Nts","false","false","","Unclustered","6.0","0","ENSMUSG00000019890"
"1269","ARCHS4 Coexpression,11;Enrichr Queries,6;GTEx Coexpression,233","CPNE8,AQP8,SLC4A4,ZDHHC2,TMEM92,GLS,RASSF6,PLCE1,MNX1,CHGB,EPHA7,TRIQK,ENTPD3,CACNA2D1,CTRB1,ALG2,KCNK16,RNASE4,BHLHA15,TM4SF4,VWA5B2,ISL1,CLPS,SOAT2,LGALS12,RRAGD,JTB,KCTD14,KCTD12,CFTR,STX1A,BEX2,MAOB,GIPR,ARX,GATA4,APCDD1,CRACR2B,TSPAN2,SCN3A,NKX2-2,PTPRN2,ABCA5,SLC33A1,ST8SIA3,EIF2AK3,FN1,FZD9,SLC16A12,PYCR1,A1CF,PGA5,ST18,ATP4A,TH,FXYD2,ID4,PAM,TECPR1,FKBP11,CDKN1C,RET,PIGR,PCSK1,PTPRN,ICA1,HERPUD1,C1QTNF1,NEFM,SEC61B,FFAR1,TMED6,EDARADD,TMED8,MME,ANXA3,SLC2A13,PRSS16,PAX6,SLC35G2,PROX1,NR5A2,SLC7A8,PXDN,KIT,KCNMA1,RGN,TFF2,SAMD5,SLC43A1,GCNT1,CRYBA2,PTGS2,GNAI1,PAPSS2,MFSD4A,WIF1,PLAGL1,GCNT4,PAK3,RUNX1T1,ARNT2,F10,KCNB2,LHFPL5,GCG,SORBS2,NMNAT2,FMO4,FMO5,GCK,TTC8,KRT18,GPR142,AADAC,SGSM3,A4GNT,KIF26B,QPCT,PCDHB16,RIMBP2,GHRL,LGR5,RAMP1,FOXA3,KLB,FOXA1,RAB3C,GDA,TUSC3,GOLT1A,LOXL4,CXCL13,CLU,LCLAT1,HID1,RIMS2,RGS4,SCGN,EFEMP1,DACH1,CDH2,FAM3B,PDE8B,HADH,RGS9,CPA2,POSTN,CASR,SPINK1,KIRREL2,IGFBP5,SLC30A2,SEMA6D,ANXA10,OLFM4,ERN1,SELENOP,SCG5,SCG3,SCG2,CEMIP,PARM1,GPR119,CTTNBP2,UBA5,CACNA1A,CPLX2,HIGD1A,FUT1,NEUROD1,PCSK1N,NPC1L1,NPTX2,TAC1,RAI2,TGFB2,CBX6,EPHX2,TFPI2,DNAJC12,SYT7,QDPR,MLXIPL,CXCL10,DAP,BMP2,PLCXD3,MAP3K15,TMEM236,FEV,RCAN2,RCAN3,CPE,RNF186,LRP11,PNLIPRP1,PSCA,PDE3B,LAMC2,UNC80,ARFGEF3,ABCC8,ETV1,SSTR1,SYNGR4,SSTR3,ADRA2A,TGFBR3,DNAJC3,ALDH1A3,PTP4A3,ALDH1A1,SMIM24,RGS17,PLA2G1B,LAMA4,PALM3,LEF1,TFPI,CXXC4,AURKB,RASD1,GNG4,SLC36A4,SEC11C,CHGA,TRPA1,CADPS,PDX1,SYT13,MBOAT4,MEIS2,SGPP2,TTC39A,FAM167A,XPNPEP1,ASXL3,INSM1,UNC79","31","83.33","Rfx6","false","false","","Unclustered","3.141025641025641","0","ENSMUSG00000019900"
"1270","","",,,"Lin7a","false","false","","Unclustered","6.611111111111111","0","ENSMUSG00000019906"
"1273","","",,,"Moxd1","false","false","","Unclustered","7.644444444444445","0","ENSMUSG00000020000"
"1276","","",,,"H2afy2","false","false","","Unclustered","7.0","0","ENSMUSG00000020086"
"1278","","",,,"Rab36","false","false","","Unclustered","5.0","0","ENSMUSG00000020175"
"1279","","",,,"Adora2a","false","false","","Unclustered","7.0","0","ENSMUSG00000020178"
"1280","","",,,"Csrp2","false","false","","Unclustered","9.487179487179487","0","ENSMUSG00000020186"
"1283","","",,,"Slc5a4a","false","false","","Unclustered","6.377777777777777","0","ENSMUSG00000020229"
"1286","","",,,"Lyrm7","false","false","","Unclustered","7.644444444444445","0","ENSMUSG00000020268"
"1287","","",,,"3010026O09Rik","false","false","","Unclustered","2.0","3","ENSMUSG00000020381"
"1290","","",,,"Btg2","false","false","","Unclustered","5.653846153846154","0","ENSMUSG00000020423"
"1292","","",,,"Npc1l1","false","false","","Unclustered","5.0","0","ENSMUSG00000020447"
"1295","","",,,"Myl7","false","false","","Unclustered","4.0","0","ENSMUSG00000020469"
"1297","","",,,"Shmt1","false","false","","Unclustered","3.7333333333333334","0","ENSMUSG00000020534"
"1299","","",,,"Slc7a15","false","false","","Unclustered","7.822222222222222","0","ENSMUSG00000020600"
"1300","","",,,"Abca8b","false","false","","Unclustered","7.0","0","ENSMUSG00000020620"
"1302","","",,,"Rasl10b","false","false","","Unclustered","6.805555555555555","0","ENSMUSG00000020684"
"1308","","",,,"Mxra7","false","false","","Unclustered","6.1090909090909085","0","ENSMUSG00000020814"
"1311","","",,,"Coch","false","false","","Unclustered","5.785714285714286","0","ENSMUSG00000020953"
"1313","","",,,"Ttc8","false","false","","Unclustered","6.533333333333333","0","ENSMUSG00000021013"
"1314","","",,,"Sptb","false","false","","Unclustered","6.805555555555555","0","ENSMUSG00000021061"
"1317","","",,,"Unc79","false","false","","Unclustered","6.533333333333333","0","ENSMUSG00000021198"
"1318","","",,,"Ifi27l2b","false","false","","Unclustered","6.611111111111111","0","ENSMUSG00000021208"
"1319","","",,,"Akr1c13","false","false","","Unclustered","8.672727272727272","0","ENSMUSG00000021213"
"1323","","",,,"Gpld1","false","false","","Unclustered","5.785714285714286","0","ENSMUSG00000021340"
"1326","","",,,"Slc25a48","false","false","","Unclustered","6.805555555555555","0","ENSMUSG00000021509"
"1327","","",,,"Slc28a3","false","false","","Unclustered","7.822222222222222","0","ENSMUSG00000021553"
"1329","","",,,"Pcsk1","false","false","","Unclustered","5.785714285714286","0","ENSMUSG00000021587"
"1331","","",,,"Slc6a3","false","false","","Unclustered","7.0","0","ENSMUSG00000021609"
"1332","","",,,"Naip1","false","false","","Unclustered","4.761904761904762","0","ENSMUSG00000021640"
"1336","","",,,"Emb","false","false","","Unclustered","4.761904761904762","0","ENSMUSG00000021728"
"1338","","",,,"BC067074","false","false","","Unclustered","7.0","0","ENSMUSG00000021763"
"1340","","",,,"Cdhr1","false","false","","Unclustered","4.0","0","ENSMUSG00000021803"
"1342","","",,,"Sema3g","false","false","","Unclustered","5.0","0","ENSMUSG00000021904"
"1348","","",,,"Olfm4","false","false","","Unclustered","5.2","0","ENSMUSG00000022026"
"1349","","",,,"Clu","false","false","","Unclustered","6.0","0","ENSMUSG00000022037"
"1350","","",,,"Ephx2","false","false","","Unclustered","6.611111111111111","0","ENSMUSG00000022040"
"1351","","",,,"Scel","false","false","","Unclustered","6.611111111111111","0","ENSMUSG00000022123"
"1352","","",,,"Dct","false","false","","Unclustered","7.644444444444445","0","ENSMUSG00000022129"
"1354","","",,,"Slc22a17","false","false","","Unclustered","2.7","0","ENSMUSG00000022199"
"1355","","",,,"Dhrs4","false","false","","Unclustered","7.5636363636363635","0","ENSMUSG00000022210"
"1356","","",,,"Carmil3","false","false","","Unclustered","7.822222222222222","0","ENSMUSG00000022211"
"1357","","",,,"Tgm1","false","false","","Unclustered","6.236363636363636","0","ENSMUSG00000022218"
"1358","","",,,"Dnah5","false","false","","Unclustered","6.0","0","ENSMUSG00000022262"
"1362","","",,,"Cyp2d26","false","false","","Unclustered","8.181818181818182","0","ENSMUSG00000022445"
"1366","","",,,"Cldn1","false","false","","Unclustered","6.805555555555555","0","ENSMUSG00000022512"
"1367","","",,,"Tmem44","false","false","","Unclustered","7.5636363636363635","0","ENSMUSG00000022537"
"1368","","",,,"Cyc1","false","false","","Unclustered","7.644444444444445","0","ENSMUSG00000022551"
"1369","","",,,"Mroh1","false","false","","Unclustered","8.454545454545455","0","ENSMUSG00000022558"
"1370","","",,,"Pycrl","false","false","","Unclustered","6.0","0","ENSMUSG00000022571"
"1371","","",,,"Naprt","false","false","","Unclustered","6.377777777777777","0","ENSMUSG00000022574"
"1372","","",,,"Ly6e","false","false","","Unclustered","2.142857142857143","0","ENSMUSG00000022587"
"1373","","",,,"Psca","false","false","","Unclustered","6.0","0","ENSMUSG00000022598"
"1374","","",,,"Mapk12","false","false","","Unclustered","4.0","0","ENSMUSG00000022610"
"1377","","",,,"Nectin3","false","false","","Unclustered","5.571428571428571","0","ENSMUSG00000022656"
"1378","","",,,"Sidt1","false","false","","Unclustered","5.0","0","ENSMUSG00000022696"
"1380","","",,,"Arl6","false","false","","Unclustered","6.611111111111111","0","ENSMUSG00000022722"
"1381","","",,,"Adgrg7","false","false","","Unclustered","5.785714285714286","0","ENSMUSG00000022755"
"1382","","",,,"Ncam2","false","false","","Unclustered","8.181818181818182","0","ENSMUSG00000022762"
"1383","","",,,"Maats1","false","false","","Unclustered","4.285714285714286","0","ENSMUSG00000022805"
"1384","","",,,"Ehhadh","false","false","","Unclustered","5.5","0","ENSMUSG00000022853"
"1388","","",,,"Ripply3","false","false","","Unclustered","8.0","0","ENSMUSG00000022941"
"1392","","",,,"Rgn","false","false","","Unclustered","7.418181818181818","0","ENSMUSG00000023070"
"1393","","",,,"Fhl1","false","false","","Unclustered","5.785714285714286","0","ENSMUSG00000023092"
"1395","","",,,"Scg5","false","false","","Unclustered","5.0","0","ENSMUSG00000023236"
"1397","","",,,"Kcnk16","false","false","","Unclustered","6.0","0","ENSMUSG00000023387"
"1398","","",,,"Slc17a9","false","false","","Unclustered","7.03030303030303","0","ENSMUSG00000023393"
"1399","","",,,"Pcbp4","false","false","","Unclustered","5.2","0","ENSMUSG00000023495"
"1400","","",,,"Fam132a","false","false","","Unclustered","5.0","0","ENSMUSG00000023571"
"1402","","",,,"Paqr4","false","false","","Unclustered","5.5","0","ENSMUSG00000023909"
"1403","","",,,"Mep1a","false","false","","Unclustered","5.5","0","ENSMUSG00000023914"
"1404","","",,,"Clic5","false","false","","Unclustered","9.0","0","ENSMUSG00000023959"
"1405","","",,,"Guca1a","false","false","","Unclustered","5.785714285714286","0","ENSMUSG00000023982"
"1407","","",,,"Tff2","false","false","","Unclustered","5.785714285714286","0","ENSMUSG00000024028"
"1409","","",,,"Tmprss3","false","false","","Unclustered","7.0","0","ENSMUSG00000024034"
"1413","","",,,"Cyp1b1","false","false","","Unclustered","5.0","0","ENSMUSG00000024087"
"1415","","",,,"Slc3a1","false","false","","Unclustered","8.181818181818182","0","ENSMUSG00000024131"
"1417","","",,,"Clps","false","false","","Unclustered","6.533333333333333","0","ENSMUSG00000024225"
"1420","","",,,"Cdh2","false","false","","Unclustered","6.1090909090909085","0","ENSMUSG00000024304"
"1421","","",,,"Btnl2","false","false","","Unclustered","6.611111111111111","0","ENSMUSG00000024340"
"1423","","",,,"Gfra3","false","false","","Unclustered","6.533333333333333","0","ENSMUSG00000024366"
"1425","","",,,"Lama3","false","false","","Unclustered","4.464285714285714","0","ENSMUSG00000024421"
"1426","","",,,"Impact","false","false","","Unclustered","8.50909090909091","0","ENSMUSG00000024423"
"1428","","",,,"Dpysl3","false","false","","Unclustered","6.533333333333333","0","ENSMUSG00000024501"
"1429","","",,,"Spink1","false","false","","Unclustered","6.805555555555555","0","ENSMUSG00000024503"
"1430","","",,,"Rab27b","false","false","","Unclustered","3.7333333333333334","0","ENSMUSG00000024511"
"1431","","",,,"Dynap","false","false","","Unclustered","8.590909090909092","0","ENSMUSG00000024512"
"1432","","",,,"Gnal","false","false","","Unclustered","6.805555555555555","0","ENSMUSG00000024524"
"1435","","",,,"Galr1","false","false","","Unclustered","6.533333333333333","0","ENSMUSG00000024553"
"1439","","",,,"Gif","false","false","","Unclustered","6.805555555555555","0","ENSMUSG00000024682"
"1440","","",,,"Aldh1a7","false","false","","Unclustered","4.464285714285714","0","ENSMUSG00000024747"
"1441","","",,,"Lipk","false","false","","Unclustered","5.5","0","ENSMUSG00000024771"
"1444","","",,,"Slc25a45","false","false","","Unclustered","5.785714285714286","0","ENSMUSG00000024818"
"1445","","",,,"Gldc","false","false","","Unclustered","5.785714285714286","0","ENSMUSG00000024827"
"1447","","",,,"Cnih2","false","false","","Unclustered","6.0","0","ENSMUSG00000024873"
"1448","","",,,"Aldh3b1","false","false","","Unclustered","7.5636363636363635","0","ENSMUSG00000024885"
"1449","","",,,"Peli3","false","false","","Unclustered","8.590909090909092","0","ENSMUSG00000024901"
"1452","","",,,"Lgals12","false","false","","Unclustered","4.761904761904762","0","ENSMUSG00000024972"
"1455","","",,,"Slit1","false","false","","Unclustered","0.0","3","ENSMUSG00000025020"
"1456","","",,,"Add3","false","false","","Unclustered","7.418181818181818","0","ENSMUSG00000025026"
"1458","","",,,"Casp7","false","false","","Unclustered","6.805555555555555","0","ENSMUSG00000025076"
"1460","","",,,"Ablim1","false","false","","Unclustered","7.0","0","ENSMUSG00000025085"
"1461","","",,,"Pcyt2","false","false","","Unclustered","6.0","0","ENSMUSG00000025137"
"1462","","",,,"Pycr1","false","false","","Unclustered","6.0","0","ENSMUSG00000025140"
"1464","","",,,"Maged1","false","false","","Unclustered","6.0","0","ENSMUSG00000025151"
"1467","","",,,"Fn3k","false","false","","Unclustered","6.533333333333333","0","ENSMUSG00000025175"
"1468","","",,,"Cyp2c44","false","false","","Unclustered","6.377777777777777","0","ENSMUSG00000025197"
"1469","","",,,"Erlin1","false","false","","Unclustered","5.571428571428571","0","ENSMUSG00000025198"
"1470","","",,,"Scd3","false","false","","Unclustered","8.454545454545455","0","ENSMUSG00000025202"
"1473","","",,,"Fgd1","false","false","","Unclustered","6.0","0","ENSMUSG00000025265"
"1476","","",,,"Hsd17b6","false","false","","Unclustered","6.611111111111111","0","ENSMUSG00000025396"
"1477","","",,,"Myo1a","false","false","","Unclustered","7.5636363636363635","0","ENSMUSG00000025401"
"1478","","",,,"Inhbc","false","false","","Unclustered","6.377777777777777","0","ENSMUSG00000025405"
"1480","","",,,"Avil","false","false","","Unclustered","6.0","0","ENSMUSG00000025432"
"1481","","",,,"Prap1","false","false","","Unclustered","7.644444444444445","0","ENSMUSG00000025467"
"1482","","",,,"Adam8","false","false","","Unclustered","3.7333333333333334","0","ENSMUSG00000025473"
"1484","","",,,"Ifitm1","false","false","","Unclustered","7.644444444444445","0","ENSMUSG00000025491"
"1485","","",,,"Cdhr5","false","false","","Unclustered","5.785714285714286","0","ENSMUSG00000025497"
"1486","","",,,"Muc2","false","false","","Unclustered","5.785714285714286","0","ENSMUSG00000025515"
"1488","","",,,"Nptx1","false","false","","Unclustered","2.142857142857143","0","ENSMUSG00000025582"
"1490","","",,,"Col7a1","false","false","","Unclustered","5.5","0","ENSMUSG00000025650"
"1493","","",,,"Gng13","false","false","","Unclustered","5.785714285714286","0","ENSMUSG00000025739"
"1497","","",,,"Cplx2","false","false","","Unclustered","6.805555555555555","0","ENSMUSG00000025867"
"1498","","",,,"Myo5b","false","false","","Unclustered","5.785714285714286","0","ENSMUSG00000025885"
"1499","","",,,"Casp12","false","false","","Unclustered","8.0","0","ENSMUSG00000025887"
"1501","","",,,"Slco5a1","false","false","","Unclustered","8.0","0","ENSMUSG00000025938"
"1502","","",,,"Slc39a10","false","false","","Unclustered","3.7333333333333334","0","ENSMUSG00000025986"
"1503","","",,,"Col3a1","false","false","","Unclustered","10.0","0","ENSMUSG00000026043"
"1504","","",,,"Il18rap","false","false","","Unclustered","7.644444444444445","0","ENSMUSG00000026068"
"1506","","",,,"Sphkap","false","false","","Unclustered","6.0","0","ENSMUSG00000026163"
"1507","","",,,"Wnt10a","false","false","","Unclustered","7.418181818181818","0","ENSMUSG00000026167"
"1509","","",,,"Igfbp5","false","false","","Unclustered","8.836363636363636","0","ENSMUSG00000026185"
"1510","","",,,"Ptprn","false","false","","Unclustered","4.761904761904762","0","ENSMUSG00000026204"
"1511","","",,,"Slc23a3","false","false","","Unclustered","5.571428571428571","0","ENSMUSG00000026205"
"1514","","",,,"Ndufa10","false","false","","Unclustered","5.785714285714286","0","ENSMUSG00000026260"
"1517","","",,,"Tmem163","false","false","","Unclustered","5.5","0","ENSMUSG00000026347"
"1518","","",,,"Lct","false","false","","Unclustered","2.0","0","ENSMUSG00000026354"
"1520","","",,,"Steap3","false","false","","Unclustered","6.805555555555555","0","ENSMUSG00000026389"
"1526","","",,,"Ppfia4","false","false","","Unclustered","6.805555555555555","0","ENSMUSG00000026458"
"1527","","",,,"Rgs16","false","false","","Unclustered","7.0","0","ENSMUSG00000026475"
"1529","","",,,"Coq8a","false","false","","Unclustered","5.785714285714286","0","ENSMUSG00000026489"
"1533","","",,,"36951","false","false","","Unclustered","6.611111111111111","0","ENSMUSG00000026621"
"1534","","",,,"Rgs5","false","false","","Unclustered","8.0","0","ENSMUSG00000026678"
"1535","","",,,"Aldh9a1","false","false","","Unclustered","7.644444444444445","0","ENSMUSG00000026687"
"1537","","",,,"Lypd6b","false","false","","Unclustered","6.805555555555555","0","ENSMUSG00000026765"
"1539","","",,,"Mastl","false","false","","Unclustered","3.0","0","ENSMUSG00000026779"
"1542","","",,,"1700007K13Rik","false","false","","Unclustered","4.0","0","ENSMUSG00000026831"
"1543","","",,,"Olfm1","false","false","","Unclustered","8.454545454545455","0","ENSMUSG00000026833"
"1544","","",,,"Grb14","false","false","","Unclustered","8.0","0","ENSMUSG00000026888"
"1545","ARCHS4 Coexpression,155;GTEx Coexpression,103","KLHL32,STMN3,AQP4,PALM,ADORA1,TNR,PIP4K2A,DENND5A,MAGI2,APLP1,PRKCA,MAPK8IP2,HPCAL4,MTURN,MAPK8IP1,DKK3,CLIP3,ACAP3,MAP7D1,MAP1A,TNIK,BRSK1,NDRG4,TTYH1,ARHGEF25,ARL3,SLC1A3,MRO,NDRG2,CPLX2,PDZD4,SNN,RAB6B,ASIC1,SPTBN2,RAB11FIP5,PACSIN1,CDK18,CBX6,CADM4,DTNA,TMEM132A,DCLK2,ADAP1,CORO2B,MT3,ARHGAP23,GNAO1,QDPR,DLG4,CPE,CSPG5,SERINC1,MRVI1,MXD4,ITM2C,TMEM151B,THRA,NCAN,DIRAS1,SOBP,PKD1,JPH4,TUBA1A,SCRN1,TIMP2,IDS,KIF1A,BCAS1,ZCCHC24,PSD,PCYT1B,ELOVL2,ROM1,ITPK1,H2AFV,OLIG1,FAM219A,SYN1,DNM1,GPRC5B,INF2,ARHGEF4,ALDOC,RAPGEF4,CAMK2B,AMER2,PHLPP1,LRP1,PLPPR2,LRP3,PHYHIP,DDN,CST3,RANBP3L,NWD1,RXRA,GPC1,MVB12B,CARNS1,FLNA,CKB,NCAM2,GABRD,STOX1,MAPK4,GDF11,ARNT2,SLC12A4,SMOX,FBXL16,TUBB4A,KBTBD11,ETNPPL,GRIN1,TTLL7,MAPK11,FMNL2,KLHL5,ABI2,SYT11,TMEM229A,ASB1","54","129.0","Nacc2","false","false","","Unclustered","7.0","0","ENSMUSG00000026932"
"1546","","",,,"Uap1l1","false","false","","Unclustered","6.805555555555555","0","ENSMUSG00000026956"
"1554","","",,,"Sema6d","false","false","","Unclustered","5.0","0","ENSMUSG00000027200"
"1556","","",,,"Syt13","false","false","","Unclustered","2.4000000000000004","0","ENSMUSG00000027220"
"1557","","",,,"F2","false","false","","Unclustered","5.2","0","ENSMUSG00000027249"
"1558","","",,,"Tyro3","false","false","","Unclustered","4.761904761904762","0","ENSMUSG00000027298"
"1560","","",,,"Ppp1r14d","false","false","","Unclustered","8.0","0","ENSMUSG00000027317"
"1562","","",,,"Chgb","false","false","","Unclustered","5.5","0","ENSMUSG00000027350"
"1563","","",,,"Hdc","false","false","","Unclustered","6.805555555555555","0","ENSMUSG00000027360"
"1564","","",,,"Mal","false","false","","Unclustered","6.805555555555555","0","ENSMUSG00000027375"
"1565","","",,,"Mall","false","false","","Unclustered","6.0","0","ENSMUSG00000027377"
"1566","","",,,"Idh3b","false","false","","Unclustered","6.805555555555555","0","ENSMUSG00000027406"
"1570","","",,,"Pdrg1","false","false","","Unclustered","8.0","0","ENSMUSG00000027472"
"1571","","",,,"Col9a3","false","false","","Unclustered","6.0","0","ENSMUSG00000027570"
"1572","","",,,"Map1lc3a","false","false","","Unclustered","8.076923076923077","0","ENSMUSG00000027602"
"1574","","",,,"Mmp24","false","false","","Unclustered","6.805555555555555","0","ENSMUSG00000027612"
"1575","","",,,"Pex5l","false","false","","Unclustered","5.785714285714286","0","ENSMUSG00000027674"
"1576","","",,,"Slc2a2","false","false","","Unclustered","8.318181818181818","0","ENSMUSG00000027690"
"1579","","",,,"Trpc4","false","false","","Unclustered","7.0","0","ENSMUSG00000027748"
"1580","","",,,"Sis","false","false","","Unclustered","5.0","0","ENSMUSG00000027790"
"1581","","",,,"Bche","false","false","","Unclustered","5.5","0","ENSMUSG00000027792"
"1583","","",,,"Tm4sf4","false","false","","Unclustered","7.127272727272727","0","ENSMUSG00000027801"
"1584","","",,,"Mme","false","false","","Unclustered","6.611111111111111","0","ENSMUSG00000027820"
"1585","","",,,"Ptpn22","false","false","","Unclustered","6.805555555555555","0","ENSMUSG00000027843"
"1586","","",,,"Reg4","false","false","","Unclustered","5.785714285714286","0","ENSMUSG00000027876"
"1587","","",,,"Jtb","false","false","","Unclustered","6.805555555555555","0","ENSMUSG00000027937"
"1588","","",,,"Hadh","false","false","","Unclustered","6.236363636363636","0","ENSMUSG00000027984"
"1589","","",,,"Asic5","false","false","","Unclustered","4.761904761904762","0","ENSMUSG00000028008"
"1590","","",,,"Pdgfc","false","false","","Unclustered","5.785714285714286","0","ENSMUSG00000028019"
"1592","","",,,"Dkk2","false","false","","Unclustered","6.377777777777777","0","ENSMUSG00000028031"
"1593","","",,,"Efna3","false","false","","Unclustered","6.805555555555555","0","ENSMUSG00000028039"
"1594","","",,,"Pear1","false","false","","Unclustered","7.822222222222222","0","ENSMUSG00000028073"
"1596","","",,,"Dclk2","false","false","","Unclustered","6.805555555555555","0","ENSMUSG00000028078"
"1597","","",,,"Fmo5","false","false","","Unclustered","7.961538461538462","0","ENSMUSG00000028088"
"1598","","",,,"Acp6","false","false","","Unclustered","7.912087912087912","0","ENSMUSG00000028093"
[truncated: 164,421 more chars]
