# Supplementary material for: Regulatory network analysis of Paneth cell and goblet cell enriched gut organoids using transcriptomics approaches
Source: Royal Society of Chemistry journal article supplement (doi:10.1039/c9mo00130a), 2019-12-10
Supplement: c9mo00130a1.cys [file c9mo00130a1.cys › CytoscapeSession-2019_09_26-22_01/tables/62-Pan_network_lfc1.txt/LOCAL_ATTRS-org.cytoscape.model.CyEdge-Pan_network_lfc1.txt+default+edge.cytable]

CyCSV-Version	1
SUID	interaction	name	selected
java.lang.Long	java.lang.String	java.lang.String	java.lang.Boolean
Pan_network_lfc1.txt default edge
3133	TF-TG	ENSMUSG00000010175 (TF-TG) ENSMUSG00000029275	false
3134	TF-TG	ENSMUSG00000010175 (TF-TG) ENSMUSG00000038530	false
3135	TF-TG	ENSMUSG00000029275 (TF-TG) ENSMUSG00000057789	false
3136	TF-TG	ENSMUSG00000029275 (TF-TG) ENSMUSG00000073802	false
3137	TF-TG	ENSMUSG00000015846 (TF-TG) ENSMUSG00000021779	false
3138	TF-TG	ENSMUSG00000015846 (TF-TG) ENSMUSG00000022383	false
3139	TF-TG	ENSMUSG00000015846 (TF-TG) ENSMUSG00000022479	false
3140	TF-TG	ENSMUSG00000015846 (TF-TG) ENSMUSG00000022809	false
3141	TF-TG	ENSMUSG00000015846 (TF-TG) ENSMUSG00000024431	false
3142	TF-TG	ENSMUSG00000015846 (TF-TG) ENSMUSG00000058756	false
3143	TF-TG	ENSMUSG00000015846 (TF-TG) ENSMUSG00000000056	false
3144	TF-TG	ENSMUSG00000015846 (TF-TG) ENSMUSG00000000085	false
3145	TF-TG	ENSMUSG00000015846 (TF-TG) ENSMUSG00000000120	false
3146	TF-TG	ENSMUSG00000015846 (TF-TG) ENSMUSG00000000125	false
3147	TF-TG	ENSMUSG00000015846 (TF-TG) ENSMUSG00000000126	false
3148	TF-TG	ENSMUSG00000015846 (TF-TG) ENSMUSG00000000214	false
3149	TF-TG	ENSMUSG00000015846 (TF-TG) ENSMUSG00000000253	false
3150	TF-TG	ENSMUSG00000015846 (TF-TG) ENSMUSG00000000296	false
3151	TF-TG	ENSMUSG00000015846 (TF-TG) ENSMUSG00000000308	false
3152	TF-TG	ENSMUSG00000015846 (TF-TG) ENSMUSG00000000394	false
3153	TF-TG	ENSMUSG00000015846 (TF-TG) ENSMUSG00000000402	false
3154	TF-TG	ENSMUSG00000015846 (TF-TG) ENSMUSG00000000409	false
3155	TF-TG	ENSMUSG00000015846 (TF-TG) ENSMUSG00000000416	false
3156	TF-TG	ENSMUSG00000015846 (TF-TG) ENSMUSG00000000555	false
3157	TF-TG	ENSMUSG00000015846 (TF-TG) ENSMUSG00000000628	false
3158	TF-TG	ENSMUSG00000015846 (TF-TG) ENSMUSG00000000673	false
3159	TF-TG	ENSMUSG00000015846 (TF-TG) ENSMUSG00000000732	false
3160	TF-TG	ENSMUSG00000015846 (TF-TG) ENSMUSG00000000791	false
3161	TF-TG	ENSMUSG00000015846 (TF-TG) ENSMUSG00000000881	false
3162	TF-TG	ENSMUSG00000015846 (TF-TG) ENSMUSG00000000958	false
3163	TF-TG	ENSMUSG00000015846 (TF-TG) ENSMUSG00000001023	false
3164	TF-TG	ENSMUSG00000015846 (TF-TG) ENSMUSG00000001025	false
3165	TF-TG	ENSMUSG00000015846 (TF-TG) ENSMUSG00000001095	false
3166	TF-TG	ENSMUSG00000015846 (TF-TG) ENSMUSG00000001119	false
3167	TF-TG	ENSMUSG00000015846 (TF-TG) ENSMUSG00000001120	false
3168	TF-TG	ENSMUSG00000015846 (TF-TG) ENSMUSG00000001225	false
3169	TF-TG	ENSMUSG00000015846 (TF-TG) ENSMUSG00000001227	false
3170	TF-TG	ENSMUSG00000015846 (TF-TG) ENSMUSG00000001270	false
3171	TF-TG	ENSMUSG00000015846 (TF-TG) ENSMUSG00000001281	false
3172	TF-TG	ENSMUSG00000015846 (TF-TG) ENSMUSG00000001333	false
3173	TF-TG	ENSMUSG00000015846 (TF-TG) ENSMUSG00000001435	false
3174	TF-TG	ENSMUSG00000015846 (TF-TG) ENSMUSG00000001436	false
3175	TF-TG	ENSMUSG00000015846 (TF-TG) ENSMUSG00000001467	false
3176	TF-TG	ENSMUSG00000015846 (TF-TG) ENSMUSG00000001473	false
3177	TF-TG	ENSMUSG00000015846 (TF-TG) ENSMUSG00000001566	false
3178	TF-TG	ENSMUSG00000015846 (TF-TG) ENSMUSG00000001604	false
3179	TF-TG	ENSMUSG00000015846 (TF-TG) ENSMUSG00000001663	false
3180	TF-TG	ENSMUSG00000015846 (TF-TG) ENSMUSG00000001665	false
3181	TF-TG	ENSMUSG00000015846 (TF-TG) ENSMUSG00000001739	false
3182	TF-TG	ENSMUSG00000015846 (TF-TG) ENSMUSG00000001761	false
3183	TF-TG	ENSMUSG00000015846 (TF-TG) ENSMUSG00000001802	false
3184	TF-TG	ENSMUSG00000015846 (TF-TG) ENSMUSG00000001819	false
3185	TF-TG	ENSMUSG00000015846 (TF-TG) ENSMUSG00000001864	false
3186	TF-TG	ENSMUSG00000015846 (TF-TG) ENSMUSG00000001901	false
3187	TF-TG	ENSMUSG00000015846 (TF-TG) ENSMUSG00000001946	false
3188	TF-TG	ENSMUSG00000015846 (TF-TG) ENSMUSG00000002006	false
3189	TF-TG	ENSMUSG00000015846 (TF-TG) ENSMUSG00000002105	false
3190	TF-TG	ENSMUSG00000015846 (TF-TG) ENSMUSG00000002107	false
3191	TF-TG	ENSMUSG00000015846 (TF-TG) ENSMUSG00000002266	false
3192	TF-TG	ENSMUSG00000015846 (TF-TG) ENSMUSG00000002341	false
3193	TF-TG	ENSMUSG00000015846 (TF-TG) ENSMUSG00000002365	false
3194	TF-TG	ENSMUSG00000015846 (TF-TG) ENSMUSG00000002384	false
3195	TF-TG	ENSMUSG00000015846 (TF-TG) ENSMUSG00000002504	false
3196	TF-TG	ENSMUSG00000015846 (TF-TG) ENSMUSG00000002565	false
3197	TF-TG	ENSMUSG00000015846 (TF-TG) ENSMUSG00000002625	false
3198	TF-TG	ENSMUSG00000015846 (TF-TG) ENSMUSG00000002781	false
3199	TF-TG	ENSMUSG00000015846 (TF-TG) ENSMUSG00000002799	false
3200	TF-TG	ENSMUSG00000015846 (TF-TG) ENSMUSG00000002847	false
3201	TF-TG	ENSMUSG00000015846 (TF-TG) ENSMUSG00000002885	false
3202	TF-TG	ENSMUSG00000015846 (TF-TG) ENSMUSG00000002997	false
3203	TF-TG	ENSMUSG00000015846 (TF-TG) ENSMUSG00000003123	false
3204	TF-TG	ENSMUSG00000015846 (TF-TG) ENSMUSG00000003134	false
3205	TF-TG	ENSMUSG00000015846 (TF-TG) ENSMUSG00000003273	false
3206	TF-TG	ENSMUSG00000015846 (TF-TG) ENSMUSG00000003352	false
3207	TF-TG	ENSMUSG00000015846 (TF-TG) ENSMUSG00000003355	false
3208	TF-TG	ENSMUSG00000015846 (TF-TG) ENSMUSG00000003380	false
3209	TF-TG	ENSMUSG00000015846 (TF-TG) ENSMUSG00000003418	false
3210	TF-TG	ENSMUSG00000015846 (TF-TG) ENSMUSG00000003420	false
3211	TF-TG	ENSMUSG00000015846 (TF-TG) ENSMUSG00000003436	false
3212	TF-TG	ENSMUSG00000015846 (TF-TG) ENSMUSG00000003469	false
3213	TF-TG	ENSMUSG00000015846 (TF-TG) ENSMUSG00000003528	false
3214	TF-TG	ENSMUSG00000015846 (TF-TG) ENSMUSG00000003541	false
3215	TF-TG	ENSMUSG00000015846 (TF-TG) ENSMUSG00000003545	false
3216	TF-TG	ENSMUSG00000015846 (TF-TG) ENSMUSG00000003573	false
3217	TF-TG	ENSMUSG00000015846 (TF-TG) ENSMUSG00000003949	false
3218	TF-TG	ENSMUSG00000015846 (TF-TG) ENSMUSG00000004038	false
3219	TF-TG	ENSMUSG00000015846 (TF-TG) ENSMUSG00000004044	false
3220	TF-TG	ENSMUSG00000015846 (TF-TG) ENSMUSG00000004113	false
3221	TF-TG	ENSMUSG00000015846 (TF-TG) ENSMUSG00000004151	false
3222	TF-TG	ENSMUSG00000015846 (TF-TG) ENSMUSG00000004270	false
3223	TF-TG	ENSMUSG00000015846 (TF-TG) ENSMUSG00000004328	false
3224	TF-TG	ENSMUSG00000015846 (TF-TG) ENSMUSG00000004415	false
3225	TF-TG	ENSMUSG00000015846 (TF-TG) ENSMUSG00000004540	false
3226	TF-TG	ENSMUSG00000015846 (TF-TG) ENSMUSG00000004558	false
3227	TF-TG	ENSMUSG00000015846 (TF-TG) ENSMUSG00000004654	false
3228	TF-TG	ENSMUSG00000015846 (TF-TG) ENSMUSG00000004709	false
3229	TF-TG	ENSMUSG00000015846 (TF-TG) ENSMUSG00000004768	false
3230	TF-TG	ENSMUSG00000015846 (TF-TG) ENSMUSG00000004789	false
3231	TF-TG	ENSMUSG00000015846 (TF-TG) ENSMUSG00000004864	false
3232	TF-TG	ENSMUSG00000015846 (TF-TG) ENSMUSG00000004880	false
3233	TF-TG	ENSMUSG00000015846 (TF-TG) ENSMUSG00000004951	false
3234	TF-TG	ENSMUSG00000015846 (TF-TG) ENSMUSG00000005107	false
3235	TF-TG	ENSMUSG00000015846 (TF-TG) ENSMUSG00000005237	false
3236	TF-TG	ENSMUSG00000015846 (TF-TG) ENSMUSG00000005267	false
3237	TF-TG	ENSMUSG00000015846 (TF-TG) ENSMUSG00000005268	false
3238	TF-TG	ENSMUSG00000015846 (TF-TG) ENSMUSG00000005320	false
3239	TF-TG	ENSMUSG00000015846 (TF-TG) ENSMUSG00000005355	false
3240	TF-TG	ENSMUSG00000015846 (TF-TG) ENSMUSG00000005360	false
3241	TF-TG	ENSMUSG00000015846 (TF-TG) ENSMUSG00000005373	false
3242	TF-TG	ENSMUSG00000015846 (TF-TG) ENSMUSG00000005413	false
3243	TF-TG	ENSMUSG00000015846 (TF-TG) ENSMUSG00000005447	false
3244	TF-TG	ENSMUSG00000015846 (TF-TG) ENSMUSG00000005470	false
3245	TF-TG	ENSMUSG00000015846 (TF-TG) ENSMUSG00000005553	false
3246	TF-TG	ENSMUSG00000015846 (TF-TG) ENSMUSG00000005611	false
3247	TF-TG	ENSMUSG00000015846 (TF-TG) ENSMUSG00000005672	false
3248	TF-TG	ENSMUSG00000015846 (TF-TG) ENSMUSG00000005677	false
3249	TF-TG	ENSMUSG00000015846 (TF-TG) ENSMUSG00000005873	false
3250	TF-TG	ENSMUSG00000015846 (TF-TG) ENSMUSG00000005958	false
3251	TF-TG	ENSMUSG00000015846 (TF-TG) ENSMUSG00000005973	false
3252	TF-TG	ENSMUSG00000015846 (TF-TG) ENSMUSG00000005981	false
3253	TF-TG	ENSMUSG00000015846 (TF-TG) ENSMUSG00000005986	false
3254	TF-TG	ENSMUSG00000015846 (TF-TG) ENSMUSG00000006342	false
3255	TF-TG	ENSMUSG00000015846 (TF-TG) ENSMUSG00000006345	false
3256	TF-TG	ENSMUSG00000015846 (TF-TG) ENSMUSG00000006369	false
3257	TF-TG	ENSMUSG00000015846 (TF-TG) ENSMUSG00000006378	false
3258	TF-TG	ENSMUSG00000015846 (TF-TG) ENSMUSG00000006411	false
3259	TF-TG	ENSMUSG00000015846 (TF-TG) ENSMUSG00000006435	false
3260	TF-TG	ENSMUSG00000015846 (TF-TG) ENSMUSG00000006463	false
3261	TF-TG	ENSMUSG00000015846 (TF-TG) ENSMUSG00000006494	false
3262	TF-TG	ENSMUSG00000015846 (TF-TG) ENSMUSG00000006546	false
3263	TF-TG	ENSMUSG00000015846 (TF-TG) ENSMUSG00000006575	false
3264	TF-TG	ENSMUSG00000015846 (TF-TG) ENSMUSG00000006586	false
3265	TF-TG	ENSMUSG00000015846 (TF-TG) ENSMUSG00000006642	false
3266	TF-TG	ENSMUSG00000015846 (TF-TG) ENSMUSG00000006675	false
3267	TF-TG	ENSMUSG00000015846 (TF-TG) ENSMUSG00000006731	false
3268	TF-TG	ENSMUSG00000015846 (TF-TG) ENSMUSG00000006777	false
3269	TF-TG	ENSMUSG00000015846 (TF-TG) ENSMUSG00000006800	false
3270	TF-TG	ENSMUSG00000015846 (TF-TG) ENSMUSG00000006930	false
3271	TF-TG	ENSMUSG00000015846 (TF-TG) ENSMUSG00000007039	false
3272	TF-TG	ENSMUSG00000015846 (TF-TG) ENSMUSG00000007207	false
3273	TF-TG	ENSMUSG00000015846 (TF-TG) ENSMUSG00000007888	false
3274	TF-TG	ENSMUSG00000015846 (TF-TG) ENSMUSG00000007950	false
3275	TF-TG	ENSMUSG00000015846 (TF-TG) ENSMUSG00000007989	false
3276	TF-TG	ENSMUSG00000015846 (TF-TG) ENSMUSG00000008090	false
3277	TF-TG	ENSMUSG00000015846 (TF-TG) ENSMUSG00000008398	false
3278	TF-TG	ENSMUSG00000015846 (TF-TG) ENSMUSG00000008461	false
3279	TF-TG	ENSMUSG00000015846 (TF-TG) ENSMUSG00000008540	false
3280	TF-TG	ENSMUSG00000015846 (TF-TG) ENSMUSG00000008734	false
3281	TF-TG	ENSMUSG00000015846 (TF-TG) ENSMUSG00000009246	false
3282	TF-TG	ENSMUSG00000015846 (TF-TG) ENSMUSG00000009378	false
3283	TF-TG	ENSMUSG00000015846 (TF-TG) ENSMUSG00000009614	false
3284	TF-TG	ENSMUSG00000015846 (TF-TG) ENSMUSG00000009646	false
3285	TF-TG	ENSMUSG00000015846 (TF-TG) ENSMUSG00000009739	false
3286	TF-TG	ENSMUSG00000015846 (TF-TG) ENSMUSG00000009863	false
3287	TF-TG	ENSMUSG00000015846 (TF-TG) ENSMUSG00000010021	false
3288	TF-TG	ENSMUSG00000015846 (TF-TG) ENSMUSG00000010122	false
3289	TF-TG	ENSMUSG00000015846 (TF-TG) ENSMUSG00000010362	false
3290	TF-TG	ENSMUSG00000015846 (TF-TG) ENSMUSG00000010505	false
3291	TF-TG	ENSMUSG00000015846 (TF-TG) ENSMUSG00000010601	false
3292	TF-TG	ENSMUSG00000015846 (TF-TG) ENSMUSG00000010651	false
3293	TF-TG	ENSMUSG00000015846 (TF-TG) ENSMUSG00000010663	false
3294	TF-TG	ENSMUSG00000015846 (TF-TG) ENSMUSG00000010803	false
3295	TF-TG	ENSMUSG00000015846 (TF-TG) ENSMUSG00000010830	false
3296	TF-TG	ENSMUSG00000015846 (TF-TG) ENSMUSG00000011008	false
3297	TF-TG	ENSMUSG00000015846 (TF-TG) ENSMUSG00000011034	false
3298	TF-TG	ENSMUSG00000015846 (TF-TG) ENSMUSG00000011148	false
3299	TF-TG	ENSMUSG00000015846 (TF-TG) ENSMUSG00000011589	false
3300	TF-TG	ENSMUSG00000015846 (TF-TG) ENSMUSG00000011752	false
3301	TF-TG	ENSMUSG00000015846 (TF-TG) ENSMUSG00000012017	false
3302	TF-TG	ENSMUSG00000015846 (TF-TG) ENSMUSG00000012123	false
3303	TF-TG	ENSMUSG00000015846 (TF-TG) ENSMUSG00000012126	false
3304	TF-TG	ENSMUSG00000015846 (TF-TG) ENSMUSG00000012443	false
3305	TF-TG	ENSMUSG00000015846 (TF-TG) ENSMUSG00000013083	false
3306	TF-TG	ENSMUSG00000015846 (TF-TG) ENSMUSG00000013089	false
3307	TF-TG	ENSMUSG00000015846 (TF-TG) ENSMUSG00000013523	false
3308	TF-TG	ENSMUSG00000015846 (TF-TG) ENSMUSG00000013698	false
3309	TF-TG	ENSMUSG00000015846 (TF-TG) ENSMUSG00000013846	false
3310	TF-TG	ENSMUSG00000015846 (TF-TG) ENSMUSG00000013921	false
3311	TF-TG	ENSMUSG00000015846 (TF-TG) ENSMUSG00000014164	false
3312	TF-TG	ENSMUSG00000015846 (TF-TG) ENSMUSG00000014303	false
3313	TF-TG	ENSMUSG00000015846 (TF-TG) ENSMUSG00000014351	false
3314	TF-TG	ENSMUSG00000015846 (TF-TG) ENSMUSG00000014361	false
3315	TF-TG	ENSMUSG00000015846 (TF-TG) ENSMUSG00000014599	false
3316	TF-TG	ENSMUSG00000015846 (TF-TG) ENSMUSG00000014602	false
3317	TF-TG	ENSMUSG00000015846 (TF-TG) ENSMUSG00000014846	false
3318	TF-TG	ENSMUSG00000015846 (TF-TG) ENSMUSG00000015112	false
3319	TF-TG	ENSMUSG00000015846 (TF-TG) ENSMUSG00000015134	false
3320	TF-TG	ENSMUSG00000015846 (TF-TG) ENSMUSG00000015189	false
3321	TF-TG	ENSMUSG00000015846 (TF-TG) ENSMUSG00000015222	false
3322	TF-TG	ENSMUSG00000015846 (TF-TG) ENSMUSG00000015224	false
3323	TF-TG	ENSMUSG00000015846 (TF-TG) ENSMUSG00000015340	false
3324	TF-TG	ENSMUSG00000015846 (TF-TG) ENSMUSG00000015342	false
3325	TF-TG	ENSMUSG00000015846 (TF-TG) ENSMUSG00000015396	false
3326	TF-TG	ENSMUSG00000015846 (TF-TG) ENSMUSG00000015401	false
3327	TF-TG	ENSMUSG00000015846 (TF-TG) ENSMUSG00000015405	false
3328	TF-TG	ENSMUSG00000015846 (TF-TG) ENSMUSG00000015533	false
3329	TF-TG	ENSMUSG00000015846 (TF-TG) ENSMUSG00000015568	false
3330	TF-TG	ENSMUSG00000015846 (TF-TG) ENSMUSG00000015647	false
3331	TF-TG	ENSMUSG00000015846 (TF-TG) ENSMUSG00000015709	false
3332	TF-TG	ENSMUSG00000015846 (TF-TG) ENSMUSG00000015745	false
3333	TF-TG	ENSMUSG00000015846 (TF-TG) ENSMUSG00000015806	false
3334	TF-TG	ENSMUSG00000015846 (TF-TG) ENSMUSG00000015829	false
3335	TF-TG	ENSMUSG00000015846 (TF-TG) ENSMUSG00000015846	false
3336	TF-TG	ENSMUSG00000015846 (TF-TG) ENSMUSG00000015850	false
3337	TF-TG	ENSMUSG00000015846 (TF-TG) ENSMUSG00000015880	false
3338	TF-TG	ENSMUSG00000015846 (TF-TG) ENSMUSG00000015962	false
3339	TF-TG	ENSMUSG00000015846 (TF-TG) ENSMUSG00000016028	false
3340	TF-TG	ENSMUSG00000015846 (TF-TG) ENSMUSG00000016200	false
3341	TF-TG	ENSMUSG00000015846 (TF-TG) ENSMUSG00000016382	false
3342	TF-TG	ENSMUSG00000015846 (TF-TG) ENSMUSG00000016534	false
3343	TF-TG	ENSMUSG00000015846 (TF-TG) ENSMUSG00000016541	false
3344	TF-TG	ENSMUSG00000015846 (TF-TG) ENSMUSG00000016624	false
3345	TF-TG	ENSMUSG00000015846 (TF-TG) ENSMUSG00000016758	false
3346	TF-TG	ENSMUSG00000015846 (TF-TG) ENSMUSG00000016763	false
3347	TF-TG	ENSMUSG00000015846 (TF-TG) ENSMUSG00000017165	false
3348	TF-TG	ENSMUSG00000015846 (TF-TG) ENSMUSG00000017195	false
3349	TF-TG	ENSMUSG00000015846 (TF-TG) ENSMUSG00000017204	false
3350	TF-TG	ENSMUSG00000015846 (TF-TG) ENSMUSG00000017211	false
3351	TF-TG	ENSMUSG00000015846 (TF-TG) ENSMUSG00000017446	false
3352	TF-TG	ENSMUSG00000015846 (TF-TG) ENSMUSG00000017453	false
3353	TF-TG	ENSMUSG00000015846 (TF-TG) ENSMUSG00000017466	false
3354	TF-TG	ENSMUSG00000015846 (TF-TG) ENSMUSG00000017639	false
3355	TF-TG	ENSMUSG00000015846 (TF-TG) ENSMUSG00000017652	false
3356	TF-TG	ENSMUSG00000015846 (TF-TG) ENSMUSG00000017667	false
3357	TF-TG	ENSMUSG00000015846 (TF-TG) ENSMUSG00000017688	false
3358	TF-TG	ENSMUSG00000015846 (TF-TG) ENSMUSG00000017692	false
3359	TF-TG	ENSMUSG00000015846 (TF-TG) ENSMUSG00000017716	false
3360	TF-TG	ENSMUSG00000015846 (TF-TG) ENSMUSG00000017724	false
3361	TF-TG	ENSMUSG00000015846 (TF-TG) ENSMUSG00000017765	false
3362	TF-TG	ENSMUSG00000015846 (TF-TG) ENSMUSG00000017943	false
3363	TF-TG	ENSMUSG00000015846 (TF-TG) ENSMUSG00000018042	false
3364	TF-TG	ENSMUSG00000015846 (TF-TG) ENSMUSG00000018143	false
3365	TF-TG	ENSMUSG00000015846 (TF-TG) ENSMUSG00000018169	false
3366	TF-TG	ENSMUSG00000015846 (TF-TG) ENSMUSG00000018334	false
3367	TF-TG	ENSMUSG00000015846 (TF-TG) ENSMUSG00000018340	false
3368	TF-TG	ENSMUSG00000015846 (TF-TG) ENSMUSG00000018411	false
3369	TF-TG	ENSMUSG00000015846 (TF-TG) ENSMUSG00000018486	false
3370	TF-TG	ENSMUSG00000015846 (TF-TG) ENSMUSG00000018507	false
3371	TF-TG	ENSMUSG00000015846 (TF-TG) ENSMUSG00000018554	false
3372	TF-TG	ENSMUSG00000015846 (TF-TG) ENSMUSG00000018566	false
3373	TF-TG	ENSMUSG00000015846 (TF-TG) ENSMUSG00000018593	false
3374	TF-TG	ENSMUSG00000015846 (TF-TG) ENSMUSG00000018620	false
3375	TF-TG	ENSMUSG00000015846 (TF-TG) ENSMUSG00000018672	false
3376	TF-TG	ENSMUSG00000015846 (TF-TG) ENSMUSG00000018740	false
3377	TF-TG	ENSMUSG00000015846 (TF-TG) ENSMUSG00000018752	false
3378	TF-TG	ENSMUSG00000015846 (TF-TG) ENSMUSG00000018774	false
3379	TF-TG	ENSMUSG00000015846 (TF-TG) ENSMUSG00000018800	false
3380	TF-TG	ENSMUSG00000015846 (TF-TG) ENSMUSG00000018846	false
3381	TF-TG	ENSMUSG00000015846 (TF-TG) ENSMUSG00000018862	false
3382	TF-TG	ENSMUSG00000015846 (TF-TG) ENSMUSG00000018865	false
3383	TF-TG	ENSMUSG00000015846 (TF-TG) ENSMUSG00000018899	false
3384	TF-TG	ENSMUSG00000015846 (TF-TG) ENSMUSG00000018906	false
3385	TF-TG	ENSMUSG00000015846 (TF-TG) ENSMUSG00000018909	false
3386	TF-TG	ENSMUSG00000015846 (TF-TG) ENSMUSG00000018919	false
3387	TF-TG	ENSMUSG00000015846 (TF-TG) ENSMUSG00000018924	false
3388	TF-TG	ENSMUSG00000015846 (TF-TG) ENSMUSG00000018983	false
3389	TF-TG	ENSMUSG00000015846 (TF-TG) ENSMUSG00000019066	false
3390	TF-TG	ENSMUSG00000015846 (TF-TG) ENSMUSG00000019087	false
3391	TF-TG	ENSMUSG00000015846 (TF-TG) ENSMUSG00000019124	false
3392	TF-TG	ENSMUSG00000015846 (TF-TG) ENSMUSG00000019158	false
3393	TF-TG	ENSMUSG00000015846 (TF-TG) ENSMUSG00000019194	false
3394	TF-TG	ENSMUSG00000015846 (TF-TG) ENSMUSG00000019232	false
3395	TF-TG	ENSMUSG00000015846 (TF-TG) ENSMUSG00000019235	false
3396	TF-TG	ENSMUSG00000015846 (TF-TG) ENSMUSG00000019359	false
3397	TF-TG	ENSMUSG00000015846 (TF-TG) ENSMUSG00000019564	false
3398	TF-TG	ENSMUSG00000015846 (TF-TG) ENSMUSG00000019647	false
3399	TF-TG	ENSMUSG00000015846 (TF-TG) ENSMUSG00000019761	false
3400	TF-TG	ENSMUSG00000015846 (TF-TG) ENSMUSG00000019762	false
3401	TF-TG	ENSMUSG00000015846 (TF-TG) ENSMUSG00000019775	false
3402	TF-TG	ENSMUSG00000015846 (TF-TG) ENSMUSG00000019796	false
3403	TF-TG	ENSMUSG00000015846 (TF-TG) ENSMUSG00000019817	false
3404	TF-TG	ENSMUSG00000015846 (TF-TG) ENSMUSG00000019831	false
3405	TF-TG	ENSMUSG00000015846 (TF-TG) ENSMUSG00000019838	false
3406	TF-TG	ENSMUSG00000015846 (TF-TG) ENSMUSG00000019843	false
3407	TF-TG	ENSMUSG00000015846 (TF-TG) ENSMUSG00000019846	false
3408	TF-TG	ENSMUSG00000015846 (TF-TG) ENSMUSG00000019853	false
3409	TF-TG	ENSMUSG00000015846 (TF-TG) ENSMUSG00000019876	false
3410	TF-TG	ENSMUSG00000015846 (TF-TG) ENSMUSG00000019877	false
3411	TF-TG	ENSMUSG00000015846 (TF-TG) ENSMUSG00000019890	false
3412	TF-TG	ENSMUSG00000015846 (TF-TG) ENSMUSG00000019900	false
3413	TF-TG	ENSMUSG00000015846 (TF-TG) ENSMUSG00000019906	false
3414	TF-TG	ENSMUSG00000015846 (TF-TG) ENSMUSG00000019916	false
3415	TF-TG	ENSMUSG00000015846 (TF-TG) ENSMUSG00000019942	false
3416	TF-TG	ENSMUSG00000015846 (TF-TG) ENSMUSG00000019945	false
3417	TF-TG	ENSMUSG00000015846 (TF-TG) ENSMUSG00000019982	false
3418	TF-TG	ENSMUSG00000015846 (TF-TG) ENSMUSG00000019986	false
3419	TF-TG	ENSMUSG00000015846 (TF-TG) ENSMUSG00000020000	false
3420	TF-TG	ENSMUSG00000015846 (TF-TG) ENSMUSG00000020009	false
3421	TF-TG	ENSMUSG00000015846 (TF-TG) ENSMUSG00000020010	false
3422	TF-TG	ENSMUSG00000015846 (TF-TG) ENSMUSG00000020014	false
3423	TF-TG	ENSMUSG00000015846 (TF-TG) ENSMUSG00000020015	false
3424	TF-TG	ENSMUSG00000015846 (TF-TG) ENSMUSG00000020034	false
3425	TF-TG	ENSMUSG00000015846 (TF-TG) ENSMUSG00000020086	false
3426	TF-TG	ENSMUSG00000015846 (TF-TG) ENSMUSG00000020092	false
3427	TF-TG	ENSMUSG00000015846 (TF-TG) ENSMUSG00000020105	false
3428	TF-TG	ENSMUSG00000015846 (TF-TG) ENSMUSG00000020121	false
3429	TF-TG	ENSMUSG00000015846 (TF-TG) ENSMUSG00000020175	false
3430	TF-TG	ENSMUSG00000015846 (TF-TG) ENSMUSG00000020178	false
3431	TF-TG	ENSMUSG00000015846 (TF-TG) ENSMUSG00000020184	false
3432	TF-TG	ENSMUSG00000015846 (TF-TG) ENSMUSG00000020186	false
3433	TF-TG	ENSMUSG00000015846 (TF-TG) ENSMUSG00000020218	false
3434	TF-TG	ENSMUSG00000015846 (TF-TG) ENSMUSG00000020226	false
3435	TF-TG	ENSMUSG00000015846 (TF-TG) ENSMUSG00000020229	false
3436	TF-TG	ENSMUSG00000015846 (TF-TG) ENSMUSG00000020230	false
3437	TF-TG	ENSMUSG00000015846 (TF-TG) ENSMUSG00000020261	false
3438	TF-TG	ENSMUSG00000015846 (TF-TG) ENSMUSG00000020268	false
3439	TF-TG	ENSMUSG00000015846 (TF-TG) ENSMUSG00000020277	false
3440	TF-TG	ENSMUSG00000015846 (TF-TG) ENSMUSG00000020303	false
3441	TF-TG	ENSMUSG00000015846 (TF-TG) ENSMUSG00000020334	false
3442	TF-TG	ENSMUSG00000015846 (TF-TG) ENSMUSG00000020363	false
3443	TF-TG	ENSMUSG00000015846 (TF-TG) ENSMUSG00000020376	false
3444	TF-TG	ENSMUSG00000015846 (TF-TG) ENSMUSG00000020381	false
3445	TF-TG	ENSMUSG00000015846 (TF-TG) ENSMUSG00000020387	false
3446	TF-TG	ENSMUSG00000015846 (TF-TG) ENSMUSG00000020388	false
3447	TF-TG	ENSMUSG00000015846 (TF-TG) ENSMUSG00000020402	false
3448	TF-TG	ENSMUSG00000015846 (TF-TG) ENSMUSG00000020407	false
3449	TF-TG	ENSMUSG00000015846 (TF-TG) ENSMUSG00000020423	false
3450	TF-TG	ENSMUSG00000015846 (TF-TG) ENSMUSG00000020424	false
3451	TF-TG	ENSMUSG00000015846 (TF-TG) ENSMUSG00000020435	false
3452	TF-TG	ENSMUSG00000015846 (TF-TG) ENSMUSG00000020447	false
3453	TF-TG	ENSMUSG00000015846 (TF-TG) ENSMUSG00000020462	false
3454	TF-TG	ENSMUSG00000015846 (TF-TG) ENSMUSG00000020467	false
3455	TF-TG	ENSMUSG00000015846 (TF-TG) ENSMUSG00000020469	false
3456	TF-TG	ENSMUSG00000015846 (TF-TG) ENSMUSG00000020471	false
3457	TF-TG	ENSMUSG00000015846 (TF-TG) ENSMUSG00000020472	false
3458	TF-TG	ENSMUSG00000015846 (TF-TG) ENSMUSG00000020534	false
3459	TF-TG	ENSMUSG00000015846 (TF-TG) ENSMUSG00000020572	false
3460	TF-TG	ENSMUSG00000015846 (TF-TG) ENSMUSG00000020581	false
3461	TF-TG	ENSMUSG00000015846 (TF-TG) ENSMUSG00000020599	false
3462	TF-TG	ENSMUSG00000015846 (TF-TG) ENSMUSG00000020600	false
3463	TF-TG	ENSMUSG00000015846 (TF-TG) ENSMUSG00000020620	false
3464	TF-TG	ENSMUSG00000015846 (TF-TG) ENSMUSG00000020635	false
3465	TF-TG	ENSMUSG00000015846 (TF-TG) ENSMUSG00000020641	false
3466	TF-TG	ENSMUSG00000015846 (TF-TG) ENSMUSG00000020658	false
3467	TF-TG	ENSMUSG00000015846 (TF-TG) ENSMUSG00000020660	false
3468	TF-TG	ENSMUSG00000015846 (TF-TG) ENSMUSG00000020668	false
3469	TF-TG	ENSMUSG00000015846 (TF-TG) ENSMUSG00000020674	false
3470	TF-TG	ENSMUSG00000015846 (TF-TG) ENSMUSG00000020684	false
3471	TF-TG	ENSMUSG00000015846 (TF-TG) ENSMUSG00000020696	false
3472	TF-TG	ENSMUSG00000015846 (TF-TG) ENSMUSG00000020707	false
3473	TF-TG	ENSMUSG00000015846 (TF-TG) ENSMUSG00000020715	false
3474	TF-TG	ENSMUSG00000015846 (TF-TG) ENSMUSG00000020732	false
3475	TF-TG	ENSMUSG00000015846 (TF-TG) ENSMUSG00000020741	false
3476	TF-TG	ENSMUSG00000015846 (TF-TG) ENSMUSG00000020747	false
3477	TF-TG	ENSMUSG00000015846 (TF-TG) ENSMUSG00000020766	false
3478	TF-TG	ENSMUSG00000015846 (TF-TG) ENSMUSG00000020788	false
3479	TF-TG	ENSMUSG00000015846 (TF-TG) ENSMUSG00000020808	false
3480	TF-TG	ENSMUSG00000015846 (TF-TG) ENSMUSG00000020814	false
3481	TF-TG	ENSMUSG00000015846 (TF-TG) ENSMUSG00000020838	false
3482	TF-TG	ENSMUSG00000015846 (TF-TG) ENSMUSG00000020846	false
3483	TF-TG	ENSMUSG00000015846 (TF-TG) ENSMUSG00000020872	false
3484	TF-TG	ENSMUSG00000015846 (TF-TG) ENSMUSG00000020875	false
3485	TF-TG	ENSMUSG00000015846 (TF-TG) ENSMUSG00000020889	false
3486	TF-TG	ENSMUSG00000015846 (TF-TG) ENSMUSG00000020892	false
3487	TF-TG	ENSMUSG00000015846 (TF-TG) ENSMUSG00000020894	false
3488	TF-TG	ENSMUSG00000015846 (TF-TG) ENSMUSG00000020897	false
3489	TF-TG	ENSMUSG00000015846 (TF-TG) ENSMUSG00000020900	false
3490	TF-TG	ENSMUSG00000015846 (TF-TG) ENSMUSG00000020953	false
3491	TF-TG	ENSMUSG00000015846 (TF-TG) ENSMUSG00000020978	false
3492	TF-TG	ENSMUSG00000015846 (TF-TG) ENSMUSG00000020986	false
3493	TF-TG	ENSMUSG00000015846 (TF-TG) ENSMUSG00000021013	false
3494	TF-TG	ENSMUSG00000015846 (TF-TG) ENSMUSG00000021061	false
3495	TF-TG	ENSMUSG00000015846 (TF-TG) ENSMUSG00000021094	false
3496	TF-TG	ENSMUSG00000015846 (TF-TG) ENSMUSG00000021108	false
3497	TF-TG	ENSMUSG00000015846 (TF-TG) ENSMUSG00000021123	false
3498	TF-TG	ENSMUSG00000015846 (TF-TG) ENSMUSG00000021125	false
3499	TF-TG	ENSMUSG00000015846 (TF-TG) ENSMUSG00000021175	false
3500	TF-TG	ENSMUSG00000015846 (TF-TG) ENSMUSG00000021185	false
3501	TF-TG	ENSMUSG00000015846 (TF-TG) ENSMUSG00000021190	false
3502	TF-TG	ENSMUSG00000015846 (TF-TG) ENSMUSG00000021194	false
3503	TF-TG	ENSMUSG00000015846 (TF-TG) ENSMUSG00000021196	false
3504	TF-TG	ENSMUSG00000015846 (TF-TG) ENSMUSG00000021198	false
3505	TF-TG	ENSMUSG00000015846 (TF-TG) ENSMUSG00000021203	false
3506	TF-TG	ENSMUSG00000015846 (TF-TG) ENSMUSG00000021208	false
3507	TF-TG	ENSMUSG00000015846 (TF-TG) ENSMUSG00000021213	false
3508	TF-TG	ENSMUSG00000015846 (TF-TG) ENSMUSG00000021221	false
3509	TF-TG	ENSMUSG00000015846 (TF-TG) ENSMUSG00000021223	false
3510	TF-TG	ENSMUSG00000015846 (TF-TG) ENSMUSG00000021226	false
3511	TF-TG	ENSMUSG00000015846 (TF-TG) ENSMUSG00000021240	false
3512	TF-TG	ENSMUSG00000015846 (TF-TG) ENSMUSG00000021280	false
3513	TF-TG	ENSMUSG00000015846 (TF-TG) ENSMUSG00000021303	false
3514	TF-TG	ENSMUSG00000015846 (TF-TG) ENSMUSG00000021337	false
3515	TF-TG	ENSMUSG00000015846 (TF-TG) ENSMUSG00000021340	false
3516	TF-TG	ENSMUSG00000015846 (TF-TG) ENSMUSG00000021364	false
3517	TF-TG	ENSMUSG00000015846 (TF-TG) ENSMUSG00000021367	false
3518	TF-TG	ENSMUSG00000015846 (TF-TG) ENSMUSG00000021453	false
3519	TF-TG	ENSMUSG00000015846 (TF-TG) ENSMUSG00000021477	false
3520	TF-TG	ENSMUSG00000015846 (TF-TG) ENSMUSG00000021509	false
3521	TF-TG	ENSMUSG00000015846 (TF-TG) ENSMUSG00000021539	false
3522	TF-TG	ENSMUSG00000015846 (TF-TG) ENSMUSG00000021553	false
3523	TF-TG	ENSMUSG00000015846 (TF-TG) ENSMUSG00000021559	false
3524	TF-TG	ENSMUSG00000015846 (TF-TG) ENSMUSG00000021587	false
3525	TF-TG	ENSMUSG00000015846 (TF-TG) ENSMUSG00000021604	false
3526	TF-TG	ENSMUSG00000015846 (TF-TG) ENSMUSG00000021608	false
3527	TF-TG	ENSMUSG00000015846 (TF-TG) ENSMUSG00000021609	false
3528	TF-TG	ENSMUSG00000015846 (TF-TG) ENSMUSG00000021640	false
3529	TF-TG	ENSMUSG00000015846 (TF-TG) ENSMUSG00000021684	false
3530	TF-TG	ENSMUSG00000015846 (TF-TG) ENSMUSG00000021685	false
3531	TF-TG	ENSMUSG00000015846 (TF-TG) ENSMUSG00000021700	false
3532	TF-TG	ENSMUSG00000015846 (TF-TG) ENSMUSG00000021701	false
3533	TF-TG	ENSMUSG00000015846 (TF-TG) ENSMUSG00000021725	false
3534	TF-TG	ENSMUSG00000015846 (TF-TG) ENSMUSG00000021728	false
3535	TF-TG	ENSMUSG00000015846 (TF-TG) ENSMUSG00000021733	false
3536	TF-TG	ENSMUSG00000015846 (TF-TG) ENSMUSG00000021763	false
3537	TF-TG	ENSMUSG00000015846 (TF-TG) ENSMUSG00000021798	false
3538	TF-TG	ENSMUSG00000015846 (TF-TG) ENSMUSG00000021803	false
3539	TF-TG	ENSMUSG00000015846 (TF-TG) ENSMUSG00000021806	false
3540	TF-TG	ENSMUSG00000015846 (TF-TG) ENSMUSG00000021822	false
3541	TF-TG	ENSMUSG00000015846 (TF-TG) ENSMUSG00000021831	false
3542	TF-TG	ENSMUSG00000015846 (TF-TG) ENSMUSG00000021838	false
3543	TF-TG	ENSMUSG00000015846 (TF-TG) ENSMUSG00000021876	false
3544	TF-TG	ENSMUSG00000015846 (TF-TG) ENSMUSG00000021904	false
3545	TF-TG	ENSMUSG00000015846 (TF-TG) ENSMUSG00000021913	false
3546	TF-TG	ENSMUSG00000015846 (TF-TG) ENSMUSG00000021928	false
3547	TF-TG	ENSMUSG00000015846 (TF-TG) ENSMUSG00000021944	false
3548	TF-TG	ENSMUSG00000015846 (TF-TG) ENSMUSG00000021947	false
3549	TF-TG	ENSMUSG00000015846 (TF-TG) ENSMUSG00000021957	false
3550	TF-TG	ENSMUSG00000015846 (TF-TG) ENSMUSG00000021974	false
3551	TF-TG	ENSMUSG00000015846 (TF-TG) ENSMUSG00000021986	false
3552	TF-TG	ENSMUSG00000015846 (TF-TG) ENSMUSG00000021994	false
3553	TF-TG	ENSMUSG00000015846 (TF-TG) ENSMUSG00000022014	false
3554	TF-TG	ENSMUSG00000015846 (TF-TG) ENSMUSG00000022026	false
3555	TF-TG	ENSMUSG00000015846 (TF-TG) ENSMUSG00000022033	false
3556	TF-TG	ENSMUSG00000015846 (TF-TG) ENSMUSG00000022037	false
3557	TF-TG	ENSMUSG00000015846 (TF-TG) ENSMUSG00000022040	false
3558	TF-TG	ENSMUSG00000015846 (TF-TG) ENSMUSG00000022051	false
3559	TF-TG	ENSMUSG00000015846 (TF-TG) ENSMUSG00000022094	false
3560	TF-TG	ENSMUSG00000015846 (TF-TG) ENSMUSG00000022105	false
3561	TF-TG	ENSMUSG00000015846 (TF-TG) ENSMUSG00000022123	false
3562	TF-TG	ENSMUSG00000015846 (TF-TG) ENSMUSG00000022129	false
3563	TF-TG	ENSMUSG00000015846 (TF-TG) ENSMUSG00000022136	false
3564	TF-TG	ENSMUSG00000015846 (TF-TG) ENSMUSG00000022148	false
3565	TF-TG	ENSMUSG00000015846 (TF-TG) ENSMUSG00000022178	false
3566	TF-TG	ENSMUSG00000015846 (TF-TG) ENSMUSG00000022180	false
3567	TF-TG	ENSMUSG00000015846 (TF-TG) ENSMUSG00000022199	false
3568	TF-TG	ENSMUSG00000015846 (TF-TG) ENSMUSG00000022208	false
3569	TF-TG	ENSMUSG00000015846 (TF-TG) ENSMUSG00000022210	false
3570	TF-TG	ENSMUSG00000015846 (TF-TG) ENSMUSG00000022211	false
3571	TF-TG	ENSMUSG00000015846 (TF-TG) ENSMUSG00000022217	false
3572	TF-TG	ENSMUSG00000015846 (TF-TG) ENSMUSG00000022218	false
3573	TF-TG	ENSMUSG00000015846 (TF-TG) ENSMUSG00000022219	false
3574	TF-TG	ENSMUSG00000015846 (TF-TG) ENSMUSG00000022235	false
3575	TF-TG	ENSMUSG00000015846 (TF-TG) ENSMUSG00000022253	false
3576	TF-TG	ENSMUSG00000015846 (TF-TG) ENSMUSG00000022262	false
3577	TF-TG	ENSMUSG00000015846 (TF-TG) ENSMUSG00000022265	false
3578	TF-TG	ENSMUSG00000015846 (TF-TG) ENSMUSG00000022324	false
3579	TF-TG	ENSMUSG00000015846 (TF-TG) ENSMUSG00000022332	false
3580	TF-TG	ENSMUSG00000015846 (TF-TG) ENSMUSG00000022364	false
3581	TF-TG	ENSMUSG00000015846 (TF-TG) ENSMUSG00000022435	false
3582	TF-TG	ENSMUSG00000015846 (TF-TG) ENSMUSG00000022436	false
3583	TF-TG	ENSMUSG00000015846 (TF-TG) ENSMUSG00000022445	false
3584	TF-TG	ENSMUSG00000015846 (TF-TG) ENSMUSG00000022456	false
3585	TF-TG	ENSMUSG00000015846 (TF-TG) ENSMUSG00000022477	false
3586	TF-TG	ENSMUSG00000015846 (TF-TG) ENSMUSG00000022489	false
3587	TF-TG	ENSMUSG00000015846 (TF-TG) ENSMUSG00000022512	false
3588	TF-TG	ENSMUSG00000015846 (TF-TG) ENSMUSG00000022519	false
3589	TF-TG	ENSMUSG00000015846 (TF-TG) ENSMUSG00000022528	false
3590	TF-TG	ENSMUSG00000015846 (TF-TG) ENSMUSG00000022537	false
3591	TF-TG	ENSMUSG00000015846 (TF-TG) ENSMUSG00000022543	false
3592	TF-TG	ENSMUSG00000015846 (TF-TG) ENSMUSG00000022546	false
3593	TF-TG	ENSMUSG00000015846 (TF-TG) ENSMUSG00000022551	false
3594	TF-TG	ENSMUSG00000015846 (TF-TG) ENSMUSG00000022555	false
3595	TF-TG	ENSMUSG00000015846 (TF-TG) ENSMUSG00000022558	false
3596	TF-TG	ENSMUSG00000015846 (TF-TG) ENSMUSG00000022571	false
3597	TF-TG	ENSMUSG00000015846 (TF-TG) ENSMUSG00000022574	false
3598	TF-TG	ENSMUSG00000015846 (TF-TG) ENSMUSG00000022587	false
3599	TF-TG	ENSMUSG00000015846 (TF-TG) ENSMUSG00000022598	false
3600	TF-TG	ENSMUSG00000015846 (TF-TG) ENSMUSG00000022610	false
3601	TF-TG	ENSMUSG00000015846 (TF-TG) ENSMUSG00000022619	false
3602	TF-TG	ENSMUSG00000015846 (TF-TG) ENSMUSG00000022621	false
3603	TF-TG	ENSMUSG00000015846 (TF-TG) ENSMUSG00000022629	false
3604	TF-TG	ENSMUSG00000015846 (TF-TG) ENSMUSG00000022637	false
3605	TF-TG	ENSMUSG00000015846 (TF-TG) ENSMUSG00000022652	false
3606	TF-TG	ENSMUSG00000015846 (TF-TG) ENSMUSG00000022656	false
3607	TF-TG	ENSMUSG00000015846 (TF-TG) ENSMUSG00000022687	false
3608	TF-TG	ENSMUSG00000015846 (TF-TG) ENSMUSG00000022696	false
3609	TF-TG	ENSMUSG00000015846 (TF-TG) ENSMUSG00000022707	false
3610	TF-TG	ENSMUSG00000015846 (TF-TG) ENSMUSG00000022722	false
3611	TF-TG	ENSMUSG00000015846 (TF-TG) ENSMUSG00000022742	false
3612	TF-TG	ENSMUSG00000015846 (TF-TG) ENSMUSG00000022755	false
3613	TF-TG	ENSMUSG00000015846 (TF-TG) ENSMUSG00000022762	false
3614	TF-TG	ENSMUSG00000015846 (TF-TG) ENSMUSG00000022769	false
3615	TF-TG	ENSMUSG00000015846 (TF-TG) ENSMUSG00000022805	false
3616	TF-TG	ENSMUSG00000015846 (TF-TG) ENSMUSG00000022817	false
3617	TF-TG	ENSMUSG00000015846 (TF-TG) ENSMUSG00000022829	false
3618	TF-TG	ENSMUSG00000015846 (TF-TG) ENSMUSG00000022836	false
3619	TF-TG	ENSMUSG00000015846 (TF-TG) ENSMUSG00000022844	false
3620	TF-TG	ENSMUSG00000015846 (TF-TG) ENSMUSG00000022853	false
3621	TF-TG	ENSMUSG00000015846 (TF-TG) ENSMUSG00000022863	false
3622	TF-TG	ENSMUSG00000015846 (TF-TG) ENSMUSG00000022864	false
3623	TF-TG	ENSMUSG00000015846 (TF-TG) ENSMUSG00000022883	false
3624	TF-TG	ENSMUSG00000015846 (TF-TG) ENSMUSG00000022900	false
3625	TF-TG	ENSMUSG00000015846 (TF-TG) ENSMUSG00000022938	false
3626	TF-TG	ENSMUSG00000015846 (TF-TG) ENSMUSG00000022941	false
3627	TF-TG	ENSMUSG00000015846 (TF-TG) ENSMUSG00000022947	false
3628	TF-TG	ENSMUSG00000015846 (TF-TG) ENSMUSG00000022995	false
3629	TF-TG	ENSMUSG00000015846 (TF-TG) ENSMUSG00000023004	false
3630	TF-TG	ENSMUSG00000015846 (TF-TG) ENSMUSG00000023008	false
3631	TF-TG	ENSMUSG00000015846 (TF-TG) ENSMUSG00000023015	false
3632	TF-TG	ENSMUSG00000015846 (TF-TG) ENSMUSG00000023017	false
3633	TF-TG	ENSMUSG00000015846 (TF-TG) ENSMUSG00000023032	false
3634	TF-TG	ENSMUSG00000015846 (TF-TG) ENSMUSG00000023043	false
3635	TF-TG	ENSMUSG00000015846 (TF-TG) ENSMUSG00000023045	false
3636	TF-TG	ENSMUSG00000015846 (TF-TG) ENSMUSG00000023050	false
3637	TF-TG	ENSMUSG00000015846 (TF-TG) ENSMUSG00000023070	false
3638	TF-TG	ENSMUSG00000015846 (TF-TG) ENSMUSG00000023078	false
3639	TF-TG	ENSMUSG00000015846 (TF-TG) ENSMUSG00000023092	false
3640	TF-TG	ENSMUSG00000015846 (TF-TG) ENSMUSG00000023122	false
3641	TF-TG	ENSMUSG00000015846 (TF-TG) ENSMUSG00000023224	false
3642	TF-TG	ENSMUSG00000015846 (TF-TG) ENSMUSG00000023236	false
3643	TF-TG	ENSMUSG00000015846 (TF-TG) ENSMUSG00000023243	false
3644	TF-TG	ENSMUSG00000015846 (TF-TG) ENSMUSG00000023247	false
3645	TF-TG	ENSMUSG00000015846 (TF-TG) ENSMUSG00000023262	false
3646	TF-TG	ENSMUSG00000015846 (TF-TG) ENSMUSG00000023387	false
3647	TF-TG	ENSMUSG00000015846 (TF-TG) ENSMUSG00000023393	false
3648	TF-TG	ENSMUSG00000015846 (TF-TG) ENSMUSG00000023473	false
3649	TF-TG	ENSMUSG00000015846 (TF-TG) ENSMUSG00000023495	false
3650	TF-TG	ENSMUSG00000015846 (TF-TG) ENSMUSG00000023571	false
3651	TF-TG	ENSMUSG00000015846 (TF-TG) ENSMUSG00000023800	false
3652	TF-TG	ENSMUSG00000015846 (TF-TG) ENSMUSG00000023809	false
3653	TF-TG	ENSMUSG00000015846 (TF-TG) ENSMUSG00000023827	false
3654	TF-TG	ENSMUSG00000015846 (TF-TG) ENSMUSG00000023829	false
3655	TF-TG	ENSMUSG00000015846 (TF-TG) ENSMUSG00000023832	false
3656	TF-TG	ENSMUSG00000015846 (TF-TG) ENSMUSG00000023905	false
3657	TF-TG	ENSMUSG00000015846 (TF-TG) ENSMUSG00000023906	false
3658	TF-TG	ENSMUSG00000015846 (TF-TG) ENSMUSG00000023909	false
3659	TF-TG	ENSMUSG00000015846 (TF-TG) ENSMUSG00000023914	false
3660	TF-TG	ENSMUSG00000015846 (TF-TG) ENSMUSG00000023940	false
3661	TF-TG	ENSMUSG00000015846 (TF-TG) ENSMUSG00000023959	false
3662	TF-TG	ENSMUSG00000015846 (TF-TG) ENSMUSG00000023961	false
3663	TF-TG	ENSMUSG00000015846 (TF-TG) ENSMUSG00000023963	false
3664	TF-TG	ENSMUSG00000015846 (TF-TG) ENSMUSG00000023982	false
3665	TF-TG	ENSMUSG00000015846 (TF-TG) ENSMUSG00000024013	false
3666	TF-TG	ENSMUSG00000015846 (TF-TG) ENSMUSG00000024028	false
3667	TF-TG	ENSMUSG00000015846 (TF-TG) ENSMUSG00000024029	false
3668	TF-TG	ENSMUSG00000015846 (TF-TG) ENSMUSG00000024030	false
3669	TF-TG	ENSMUSG00000015846 (TF-TG) ENSMUSG00000024033	false
3670	TF-TG	ENSMUSG00000015846 (TF-TG) ENSMUSG00000024034	false
3671	TF-TG	ENSMUSG00000015846 (TF-TG) ENSMUSG00000024055	false
3672	TF-TG	ENSMUSG00000015846 (TF-TG) ENSMUSG00000024063	false
3673	TF-TG	ENSMUSG00000015846 (TF-TG) ENSMUSG00000024066	false
3674	TF-TG	ENSMUSG00000015846 (TF-TG) ENSMUSG00000024074	false
3675	TF-TG	ENSMUSG00000015846 (TF-TG) ENSMUSG00000024087	false
3676	TF-TG	ENSMUSG00000015846 (TF-TG) ENSMUSG00000024105	false
3677	TF-TG	ENSMUSG00000015846 (TF-TG) ENSMUSG00000024112	false
3678	TF-TG	ENSMUSG00000015846 (TF-TG) ENSMUSG00000024124	false
3679	TF-TG	ENSMUSG00000015846 (TF-TG) ENSMUSG00000024131	false
3680	TF-TG	ENSMUSG00000015846 (TF-TG) ENSMUSG00000024140	false
3681	TF-TG	ENSMUSG00000015846 (TF-TG) ENSMUSG00000024175	false
3682	TF-TG	ENSMUSG00000015846 (TF-TG) ENSMUSG00000024193	false
3683	TF-TG	ENSMUSG00000015846 (TF-TG) ENSMUSG00000024225	false
3684	TF-TG	ENSMUSG00000015846 (TF-TG) ENSMUSG00000024232	false
3685	TF-TG	ENSMUSG00000015846 (TF-TG) ENSMUSG00000024292	false
3686	TF-TG	ENSMUSG00000015846 (TF-TG) ENSMUSG00000024302	false
3687	TF-TG	ENSMUSG00000015846 (TF-TG) ENSMUSG00000024304	false
3688	TF-TG	ENSMUSG00000015846 (TF-TG) ENSMUSG00000024330	false
3689	TF-TG	ENSMUSG00000015846 (TF-TG) ENSMUSG00000024340	false
3690	TF-TG	ENSMUSG00000015846 (TF-TG) ENSMUSG00000024349	false
3691	TF-TG	ENSMUSG00000015846 (TF-TG) ENSMUSG00000024352	false
3692	TF-TG	ENSMUSG00000015846 (TF-TG) ENSMUSG00000024354	false
3693	TF-TG	ENSMUSG00000015846 (TF-TG) ENSMUSG00000024366	false
3694	TF-TG	ENSMUSG00000015846 (TF-TG) ENSMUSG00000024378	false
3695	TF-TG	ENSMUSG00000015846 (TF-TG) ENSMUSG00000024411	false
3696	TF-TG	ENSMUSG00000015846 (TF-TG) ENSMUSG00000024421	false
3697	TF-TG	ENSMUSG00000015846 (TF-TG) ENSMUSG00000024423	false
3698	TF-TG	ENSMUSG00000015846 (TF-TG) ENSMUSG00000024424	false
3699	TF-TG	ENSMUSG00000015846 (TF-TG) ENSMUSG00000024479	false
3700	TF-TG	ENSMUSG00000015846 (TF-TG) ENSMUSG00000024501	false
3701	TF-TG	ENSMUSG00000015846 (TF-TG) ENSMUSG00000024503	false
3702	TF-TG	ENSMUSG00000015846 (TF-TG) ENSMUSG00000024511	false
3703	TF-TG	ENSMUSG00000015846 (TF-TG) ENSMUSG00000024512	false
3704	TF-TG	ENSMUSG00000015846 (TF-TG) ENSMUSG00000024516	false
3705	TF-TG	ENSMUSG00000015846 (TF-TG) ENSMUSG00000024524	false
3706	TF-TG	ENSMUSG00000015846 (TF-TG) ENSMUSG00000024525	false
3707	TF-TG	ENSMUSG00000015846 (TF-TG) ENSMUSG00000024533	false
3708	TF-TG	ENSMUSG00000015846 (TF-TG) ENSMUSG00000024548	false
3709	TF-TG	ENSMUSG00000015846 (TF-TG) ENSMUSG00000024552	false
3710	TF-TG	ENSMUSG00000015846 (TF-TG) ENSMUSG00000024553	false
3711	TF-TG	ENSMUSG00000015846 (TF-TG) ENSMUSG00000024556	false
3712	TF-TG	ENSMUSG00000015846 (TF-TG) ENSMUSG00000024590	false
3713	TF-TG	ENSMUSG00000015846 (TF-TG) ENSMUSG00000024600	false
3714	TF-TG	ENSMUSG00000015846 (TF-TG) ENSMUSG00000024601	false
3715	TF-TG	ENSMUSG00000015846 (TF-TG) ENSMUSG00000024659	false
3716	TF-TG	ENSMUSG00000015846 (TF-TG) ENSMUSG00000024664	false
3717	TF-TG	ENSMUSG00000015846 (TF-TG) ENSMUSG00000024665	false
3718	TF-TG	ENSMUSG00000015846 (TF-TG) ENSMUSG00000024682	false
3719	TF-TG	ENSMUSG00000015846 (TF-TG) ENSMUSG00000024713	false
3720	TF-TG	ENSMUSG00000015846 (TF-TG) ENSMUSG00000024727	false
3721	TF-TG	ENSMUSG00000015846 (TF-TG) ENSMUSG00000024738	false
3722	TF-TG	ENSMUSG00000015846 (TF-TG) ENSMUSG00000024743	false
3723	TF-TG	ENSMUSG00000015846 (TF-TG) ENSMUSG00000024747	false
3724	TF-TG	ENSMUSG00000015846 (TF-TG) ENSMUSG00000024771	false
3725	TF-TG	ENSMUSG00000015846 (TF-TG) ENSMUSG00000024774	false
3726	TF-TG	ENSMUSG00000015846 (TF-TG) ENSMUSG00000024795	false
3727	TF-TG	ENSMUSG00000015846 (TF-TG) ENSMUSG00000024803	false
3728	TF-TG	ENSMUSG00000015846 (TF-TG) ENSMUSG00000024810	false
3729	TF-TG	ENSMUSG00000015846 (TF-TG) ENSMUSG00000024818	false
3730	TF-TG	ENSMUSG00000015846 (TF-TG) ENSMUSG00000024827	false
3731	TF-TG	ENSMUSG00000015846 (TF-TG) ENSMUSG00000024846	false
3732	TF-TG	ENSMUSG00000015846 (TF-TG) ENSMUSG00000024873	false
3733	TF-TG	ENSMUSG00000015846 (TF-TG) ENSMUSG00000024885	false
3734	TF-TG	ENSMUSG00000015846 (TF-TG) ENSMUSG00000024887	false
3735	TF-TG	ENSMUSG00000015846 (TF-TG) ENSMUSG00000024897	false
3736	TF-TG	ENSMUSG00000015846 (TF-TG) ENSMUSG00000024899	false
3737	TF-TG	ENSMUSG00000015846 (TF-TG) ENSMUSG00000024901	false
3738	TF-TG	ENSMUSG00000015846 (TF-TG) ENSMUSG00000024909	false
3739	TF-TG	ENSMUSG00000015846 (TF-TG) ENSMUSG00000024912	false
3740	TF-TG	ENSMUSG00000015846 (TF-TG) ENSMUSG00000024935	false
3741	TF-TG	ENSMUSG00000015846 (TF-TG) ENSMUSG00000024960	false
3742	TF-TG	ENSMUSG00000015846 (TF-TG) ENSMUSG00000024972	false
3743	TF-TG	ENSMUSG00000015846 (TF-TG) ENSMUSG00000024978	false
3744	TF-TG	ENSMUSG00000015846 (TF-TG) ENSMUSG00000024981	false
3745	TF-TG	ENSMUSG00000015846 (TF-TG) ENSMUSG00000024990	false
3746	TF-TG	ENSMUSG00000015846 (TF-TG) ENSMUSG00000024998	false
3747	TF-TG	ENSMUSG00000015846 (TF-TG) ENSMUSG00000025001	false
3748	TF-TG	ENSMUSG00000015846 (TF-TG) ENSMUSG00000025020	false
3749	TF-TG	ENSMUSG00000015846 (TF-TG) ENSMUSG00000025025	false
3750	TF-TG	ENSMUSG00000015846 (TF-TG) ENSMUSG00000025026	false
3751	TF-TG	ENSMUSG00000015846 (TF-TG) ENSMUSG00000025027	false
3752	TF-TG	ENSMUSG00000015846 (TF-TG) ENSMUSG00000025035	false
3753	TF-TG	ENSMUSG00000015846 (TF-TG) ENSMUSG00000025037	false
3754	TF-TG	ENSMUSG00000015846 (TF-TG) ENSMUSG00000025075	false
3755	TF-TG	ENSMUSG00000015846 (TF-TG) ENSMUSG00000025076	false
3756	TF-TG	ENSMUSG00000015846 (TF-TG) ENSMUSG00000025081	false
3757	TF-TG	ENSMUSG00000015846 (TF-TG) ENSMUSG00000025085	false
3758	TF-TG	ENSMUSG00000015846 (TF-TG) ENSMUSG00000025089	false
3759	TF-TG	ENSMUSG00000015846 (TF-TG) ENSMUSG00000025091	false
3760	TF-TG	ENSMUSG00000015846 (TF-TG) ENSMUSG00000025137	false
3761	TF-TG	ENSMUSG00000015846 (TF-TG) ENSMUSG00000025140	false
3762	TF-TG	ENSMUSG00000015846 (TF-TG) ENSMUSG00000025150	false
3763	TF-TG	ENSMUSG00000015846 (TF-TG) ENSMUSG00000025151	false
3764	TF-TG	ENSMUSG00000015846 (TF-TG) ENSMUSG00000025154	false
3765	TF-TG	ENSMUSG00000015846 (TF-TG) ENSMUSG00000025161	false
3766	TF-TG	ENSMUSG00000015846 (TF-TG) ENSMUSG00000025175	false
3767	TF-TG	ENSMUSG00000015846 (TF-TG) ENSMUSG00000025176	false
3768	TF-TG	ENSMUSG00000015846 (TF-TG) ENSMUSG00000025185	false
3769	TF-TG	ENSMUSG00000015846 (TF-TG) ENSMUSG00000025197	false
3770	TF-TG	ENSMUSG00000015846 (TF-TG) ENSMUSG00000025198	false
3771	TF-TG	ENSMUSG00000015846 (TF-TG) ENSMUSG00000025202	false
3772	TF-TG	ENSMUSG00000015846 (TF-TG) ENSMUSG00000025203	false
3773	TF-TG	ENSMUSG00000015846 (TF-TG) ENSMUSG00000025207	false
3774	TF-TG	ENSMUSG00000015846 (TF-TG) ENSMUSG00000025227	false
3775	TF-TG	ENSMUSG00000015846 (TF-TG) ENSMUSG00000025265	false
3776	TF-TG	ENSMUSG00000015846 (TF-TG) ENSMUSG00000025279	false
3777	TF-TG	ENSMUSG00000015846 (TF-TG) ENSMUSG00000025348	false
3778	TF-TG	ENSMUSG00000015846 (TF-TG) ENSMUSG00000025351	false
3779	TF-TG	ENSMUSG00000015846 (TF-TG) ENSMUSG00000025352	false
3780	TF-TG	ENSMUSG00000015846 (TF-TG) ENSMUSG00000025396	false
3781	TF-TG	ENSMUSG00000015846 (TF-TG) ENSMUSG00000025401	false
3782	TF-TG	ENSMUSG00000015846 (TF-TG) ENSMUSG00000025405	false
3783	TF-TG	ENSMUSG00000015846 (TF-TG) ENSMUSG00000025410	false
3784	TF-TG	ENSMUSG00000015846 (TF-TG) ENSMUSG00000025428	false
3785	TF-TG	ENSMUSG00000015846 (TF-TG) ENSMUSG00000025432	false
3786	TF-TG	ENSMUSG00000015846 (TF-TG) ENSMUSG00000025467	false
3787	TF-TG	ENSMUSG00000015846 (TF-TG) ENSMUSG00000025473	false
3788	TF-TG	ENSMUSG00000015846 (TF-TG) ENSMUSG00000025477	false
3789	TF-TG	ENSMUSG00000015846 (TF-TG) ENSMUSG00000025479	false
3790	TF-TG	ENSMUSG00000015846 (TF-TG) ENSMUSG00000025491	false
3791	TF-TG	ENSMUSG00000015846 (TF-TG) ENSMUSG00000025497	false
3792	TF-TG	ENSMUSG00000015846 (TF-TG) ENSMUSG00000025500	false
3793	TF-TG	ENSMUSG00000015846 (TF-TG) ENSMUSG00000025515	false
3794	TF-TG	ENSMUSG00000015846 (TF-TG) ENSMUSG00000025545	false
3795	TF-TG	ENSMUSG00000015846 (TF-TG) ENSMUSG00000025557	false
3796	TF-TG	ENSMUSG00000015846 (TF-TG) ENSMUSG00000025576	false
3797	TF-TG	ENSMUSG00000015846 (TF-TG) ENSMUSG00000025582	false
3798	TF-TG	ENSMUSG00000015846 (TF-TG) ENSMUSG00000025584	false
3799	TF-TG	ENSMUSG00000015846 (TF-TG) ENSMUSG00000025608	false
3800	TF-TG	ENSMUSG00000015846 (TF-TG) ENSMUSG00000025648	false
3801	TF-TG	ENSMUSG00000015846 (TF-TG) ENSMUSG00000025650	false
3802	TF-TG	ENSMUSG00000015846 (TF-TG) ENSMUSG00000025652	false
3803	TF-TG	ENSMUSG00000015846 (TF-TG) ENSMUSG00000025701	false
3804	TF-TG	ENSMUSG00000015846 (TF-TG) ENSMUSG00000025726	false
3805	TF-TG	ENSMUSG00000015846 (TF-TG) ENSMUSG00000025739	false
3806	TF-TG	ENSMUSG00000015846 (TF-TG) ENSMUSG00000025758	false
3807	TF-TG	ENSMUSG00000015846 (TF-TG) ENSMUSG00000025779	false
3808	TF-TG	ENSMUSG00000015846 (TF-TG) ENSMUSG00000025780	false
3809	TF-TG	ENSMUSG00000015846 (TF-TG) ENSMUSG00000025790	false
3810	TF-TG	ENSMUSG00000015846 (TF-TG) ENSMUSG00000025867	false
3811	TF-TG	ENSMUSG00000015846 (TF-TG) ENSMUSG00000025876	false
3812	TF-TG	ENSMUSG00000015846 (TF-TG) ENSMUSG00000025885	false
3813	TF-TG	ENSMUSG00000015846 (TF-TG) ENSMUSG00000025887	false
3814	TF-TG	ENSMUSG00000015846 (TF-TG) ENSMUSG00000025893	false
3815	TF-TG	ENSMUSG00000015846 (TF-TG) ENSMUSG00000025903	false
3816	TF-TG	ENSMUSG00000015846 (TF-TG) ENSMUSG00000025921	false
3817	TF-TG	ENSMUSG00000015846 (TF-TG) ENSMUSG00000025938	false
3818	TF-TG	ENSMUSG00000015846 (TF-TG) ENSMUSG00000025959	false
3819	TF-TG	ENSMUSG00000015846 (TF-TG) ENSMUSG00000025969	false
3820	TF-TG	ENSMUSG00000015846 (TF-TG) ENSMUSG00000025986	false
3821	TF-TG	ENSMUSG00000015846 (TF-TG) ENSMUSG00000025991	false
3822	TF-TG	ENSMUSG00000015846 (TF-TG) ENSMUSG00000026043	false
3823	TF-TG	ENSMUSG00000015846 (TF-TG) ENSMUSG00000026068	false
3824	TF-TG	ENSMUSG00000015846 (TF-TG) ENSMUSG00000026072	false
3825	TF-TG	ENSMUSG00000015846 (TF-TG) ENSMUSG00000026077	false
3826	TF-TG	ENSMUSG00000015846 (TF-TG) ENSMUSG00000026090	false
3827	TF-TG	ENSMUSG00000015846 (TF-TG) ENSMUSG00000026094	false
3828	TF-TG	ENSMUSG00000015846 (TF-TG) ENSMUSG00000026103	false
3829	TF-TG	ENSMUSG00000015846 (TF-TG) ENSMUSG00000026107	false
3830	TF-TG	ENSMUSG00000015846 (TF-TG) ENSMUSG00000026163	false
3831	TF-TG	ENSMUSG00000015846 (TF-TG) ENSMUSG00000026167	false
3832	TF-TG	ENSMUSG00000015846 (TF-TG) ENSMUSG00000026170	false
3833	TF-TG	ENSMUSG00000015846 (TF-TG) ENSMUSG00000026185	false
3834	TF-TG	ENSMUSG00000015846 (TF-TG) ENSMUSG00000026204	false
3835	TF-TG	ENSMUSG00000015846 (TF-TG) ENSMUSG00000026205	false
3836	TF-TG	ENSMUSG00000015846 (TF-TG) ENSMUSG00000026223	false
3837	TF-TG	ENSMUSG00000015846 (TF-TG) ENSMUSG00000026227	false
3838	TF-TG	ENSMUSG00000015846 (TF-TG) ENSMUSG00000026247	false
3839	TF-TG	ENSMUSG00000015846 (TF-TG) ENSMUSG00000026260	false
3840	TF-TG	ENSMUSG00000015846 (TF-TG) ENSMUSG00000026278	false
3841	TF-TG	ENSMUSG00000015846 (TF-TG) ENSMUSG00000026311	false
3842	TF-TG	ENSMUSG00000015846 (TF-TG) ENSMUSG00000026321	false
3843	TF-TG	ENSMUSG00000015846 (TF-TG) ENSMUSG00000026335	false
3844	TF-TG	ENSMUSG00000015846 (TF-TG) ENSMUSG00000026347	false
3845	TF-TG	ENSMUSG00000015846 (TF-TG) ENSMUSG00000026354	false
3846	TF-TG	ENSMUSG00000015846 (TF-TG) ENSMUSG00000026380	false
3847	TF-TG	ENSMUSG00000015846 (TF-TG) ENSMUSG00000026389	false
3848	TF-TG	ENSMUSG00000015846 (TF-TG) ENSMUSG00000026395	false
3849	TF-TG	ENSMUSG00000015846 (TF-TG) ENSMUSG00000026398	false
3850	TF-TG	ENSMUSG00000015846 (TF-TG) ENSMUSG00000026405	false
3851	TF-TG	ENSMUSG00000015846 (TF-TG) ENSMUSG00000026415	false
3852	TF-TG	ENSMUSG00000015846 (TF-TG) ENSMUSG00000026417	false
3853	TF-TG	ENSMUSG00000015846 (TF-TG) ENSMUSG00000026430	false
3854	TF-TG	ENSMUSG00000015846 (TF-TG) ENSMUSG00000026442	false
3855	TF-TG	ENSMUSG00000015846 (TF-TG) ENSMUSG00000026443	false
3856	TF-TG	ENSMUSG00000015846 (TF-TG) ENSMUSG00000026447	false
3857	TF-TG	ENSMUSG00000015846 (TF-TG) ENSMUSG00000026458	false
3858	TF-TG	ENSMUSG00000015846 (TF-TG) ENSMUSG00000026475	false
3859	TF-TG	ENSMUSG00000015846 (TF-TG) ENSMUSG00000026479	false
3860	TF-TG	ENSMUSG00000015846 (TF-TG) ENSMUSG00000026483	false
3861	TF-TG	ENSMUSG00000015846 (TF-TG) ENSMUSG00000026489	false
3862	TF-TG	ENSMUSG00000015846 (TF-TG) ENSMUSG00000026494	false
3863	TF-TG	ENSMUSG00000015846 (TF-TG) ENSMUSG00000026504	false
3864	TF-TG	ENSMUSG00000015846 (TF-TG) ENSMUSG00000026509	false
3865	TF-TG	ENSMUSG00000015846 (TF-TG) ENSMUSG00000026520	false
3866	TF-TG	ENSMUSG00000015846 (TF-TG) ENSMUSG00000026527	false
3867	TF-TG	ENSMUSG00000015846 (TF-TG) ENSMUSG00000026546	false
3868	TF-TG	ENSMUSG00000015846 (TF-TG) ENSMUSG00000026548	false
3869	TF-TG	ENSMUSG00000015846 (TF-TG) ENSMUSG00000026586	false
3870	TF-TG	ENSMUSG00000015846 (TF-TG) ENSMUSG00000026604	false
3871	TF-TG	ENSMUSG00000015846 (TF-TG) ENSMUSG00000026605	false
3872	TF-TG	ENSMUSG00000015846 (TF-TG) ENSMUSG00000026621	false
3873	TF-TG	ENSMUSG00000015846 (TF-TG) ENSMUSG00000026649	false
3874	TF-TG	ENSMUSG00000015846 (TF-TG) ENSMUSG00000026678	false
3875	TF-TG	ENSMUSG00000015846 (TF-TG) ENSMUSG00000026687	false
3876	TF-TG	ENSMUSG00000015846 (TF-TG) ENSMUSG00000026688	false
3877	TF-TG	ENSMUSG00000015846 (TF-TG) ENSMUSG00000026692	false
3878	TF-TG	ENSMUSG00000015846 (TF-TG) ENSMUSG00000026730	false
3879	TF-TG	ENSMUSG00000015846 (TF-TG) ENSMUSG00000026764	false
3880	TF-TG	ENSMUSG00000015846 (TF-TG) ENSMUSG00000026765	false
3881	TF-TG	ENSMUSG00000015846 (TF-TG) ENSMUSG00000026773	false
3882	TF-TG	ENSMUSG00000015846 (TF-TG) ENSMUSG00000026779	false
3883	TF-TG	ENSMUSG00000015846 (TF-TG) ENSMUSG00000026782	false
3884	TF-TG	ENSMUSG00000015846 (TF-TG) ENSMUSG00000026785	false
3885	TF-TG	ENSMUSG00000015846 (TF-TG) ENSMUSG00000026786	false
3886	TF-TG	ENSMUSG00000015846 (TF-TG) ENSMUSG00000026820	false
3887	TF-TG	ENSMUSG00000015846 (TF-TG) ENSMUSG00000026831	false
3888	TF-TG	ENSMUSG00000015846 (TF-TG) ENSMUSG00000026833	false
3889	TF-TG	ENSMUSG00000015846 (TF-TG) ENSMUSG00000026848	false
3890	TF-TG	ENSMUSG00000015846 (TF-TG) ENSMUSG00000026879	false
3891	TF-TG	ENSMUSG00000015846 (TF-TG) ENSMUSG00000026880	false
3892	TF-TG	ENSMUSG00000015846 (TF-TG) ENSMUSG00000026888	false
3893	TF-TG	ENSMUSG00000015846 (TF-TG) ENSMUSG00000026921	false
3894	TF-TG	ENSMUSG00000015846 (TF-TG) ENSMUSG00000026930	false
3895	TF-TG	ENSMUSG00000015846 (TF-TG) ENSMUSG00000026932	false
3896	TF-TG	ENSMUSG00000015846 (TF-TG) ENSMUSG00000026956	false
3897	TF-TG	ENSMUSG00000015846 (TF-TG) ENSMUSG00000026959	false
3898	TF-TG	ENSMUSG00000015846 (TF-TG) ENSMUSG00000026961	false
3899	TF-TG	ENSMUSG00000015846 (TF-TG) ENSMUSG00000026970	false
3900	TF-TG	ENSMUSG00000015846 (TF-TG) ENSMUSG00000026980	false
3901	TF-TG	ENSMUSG00000015846 (TF-TG) ENSMUSG00000026981	false
3902	TF-TG	ENSMUSG00000015846 (TF-TG) ENSMUSG00000027006	false
3903	TF-TG	ENSMUSG00000015846 (TF-TG) ENSMUSG00000027068	false
3904	TF-TG	ENSMUSG00000015846 (TF-TG) ENSMUSG00000027074	false
3905	TF-TG	ENSMUSG00000015846 (TF-TG) ENSMUSG00000027075	false
3906	TF-TG	ENSMUSG00000015846 (TF-TG) ENSMUSG00000027082	false
3907	TF-TG	ENSMUSG00000015846 (TF-TG) ENSMUSG00000027173	false
3908	TF-TG	ENSMUSG00000015846 (TF-TG) ENSMUSG00000027175	false
3909	TF-TG	ENSMUSG00000015846 (TF-TG) ENSMUSG00000027187	false
3910	TF-TG	ENSMUSG00000015846 (TF-TG) ENSMUSG00000027200	false
3911	TF-TG	ENSMUSG00000015846 (TF-TG) ENSMUSG00000027219	false
3912	TF-TG	ENSMUSG00000015846 (TF-TG) ENSMUSG00000027220	false
3913	TF-TG	ENSMUSG00000015846 (TF-TG) ENSMUSG00000027249	false
3914	TF-TG	ENSMUSG00000015846 (TF-TG) ENSMUSG00000027254	false
3915	TF-TG	ENSMUSG00000015846 (TF-TG) ENSMUSG00000027273	false
3916	TF-TG	ENSMUSG00000015846 (TF-TG) ENSMUSG00000027298	false
3917	TF-TG	ENSMUSG00000015846 (TF-TG) ENSMUSG00000027313	false
3918	TF-TG	ENSMUSG00000015846 (TF-TG) ENSMUSG00000027316	false
3919	TF-TG	ENSMUSG00000015846 (TF-TG) ENSMUSG00000027317	false
3920	TF-TG	ENSMUSG00000015846 (TF-TG) ENSMUSG00000027326	false
3921	TF-TG	ENSMUSG00000015846 (TF-TG) ENSMUSG00000027333	false
3922	TF-TG	ENSMUSG00000015846 (TF-TG) ENSMUSG00000027346	false
3923	TF-TG	ENSMUSG00000015846 (TF-TG) ENSMUSG00000027350	false
3924	TF-TG	ENSMUSG00000015846 (TF-TG) ENSMUSG00000027358	false
3925	TF-TG	ENSMUSG00000015846 (TF-TG) ENSMUSG00000027360	false
3926	TF-TG	ENSMUSG00000015846 (TF-TG) ENSMUSG00000027375	false
3927	TF-TG	ENSMUSG00000015846 (TF-TG) ENSMUSG00000027377	false
3928	TF-TG	ENSMUSG00000015846 (TF-TG) ENSMUSG00000027379	false
3929	TF-TG	ENSMUSG00000015846 (TF-TG) ENSMUSG00000027406	false
3930	TF-TG	ENSMUSG00000015846 (TF-TG) ENSMUSG00000027420	false
3931	TF-TG	ENSMUSG00000015846 (TF-TG) ENSMUSG00000027435	false
3932	TF-TG	ENSMUSG00000015846 (TF-TG) ENSMUSG00000027438	false
3933	TF-TG	ENSMUSG00000015846 (TF-TG) ENSMUSG00000027447	false
3934	TF-TG	ENSMUSG00000015846 (TF-TG) ENSMUSG00000027469	false
3935	TF-TG	ENSMUSG00000015846 (TF-TG) ENSMUSG00000027472	false
3936	TF-TG	ENSMUSG00000015846 (TF-TG) ENSMUSG00000027499	false
3937	TF-TG	ENSMUSG00000015846 (TF-TG) ENSMUSG00000027514	false
3938	TF-TG	ENSMUSG00000015846 (TF-TG) ENSMUSG00000027534	false
3939	TF-TG	ENSMUSG00000015846 (TF-TG) ENSMUSG00000027544	false
3940	TF-TG	ENSMUSG00000015846 (TF-TG) ENSMUSG00000027570	false
3941	TF-TG	ENSMUSG00000015846 (TF-TG) ENSMUSG00000027602	false
3942	TF-TG	ENSMUSG00000015846 (TF-TG) ENSMUSG00000027611	false
3943	TF-TG	ENSMUSG00000015846 (TF-TG) ENSMUSG00000027612	false
3944	TF-TG	ENSMUSG00000015846 (TF-TG) ENSMUSG00000027654	false
3945	TF-TG	ENSMUSG00000015846 (TF-TG) ENSMUSG00000027661	false
3946	TF-TG	ENSMUSG00000015846 (TF-TG) ENSMUSG00000027674	false
3947	TF-TG	ENSMUSG00000015846 (TF-TG) ENSMUSG00000027690	false
3948	TF-TG	ENSMUSG00000015846 (TF-TG) ENSMUSG00000027692	false
3949	TF-TG	ENSMUSG00000015846 (TF-TG) ENSMUSG00000027695	false
3950	TF-TG	ENSMUSG00000015846 (TF-TG) ENSMUSG00000027698	false
3951	TF-TG	ENSMUSG00000015846 (TF-TG) ENSMUSG00000027715	false
3952	TF-TG	ENSMUSG00000015846 (TF-TG) ENSMUSG00000027737	false
3953	TF-TG	ENSMUSG00000015846 (TF-TG) ENSMUSG00000027746	false
3954	TF-TG	ENSMUSG00000015846 (TF-TG) ENSMUSG00000027748	false
3955	TF-TG	ENSMUSG00000015846 (TF-TG) ENSMUSG00000027750	false
3956	TF-TG	ENSMUSG00000015846 (TF-TG) ENSMUSG00000027790	false
3957	TF-TG	ENSMUSG00000015846 (TF-TG) ENSMUSG00000027792	false
3958	TF-TG	ENSMUSG00000015846 (TF-TG) ENSMUSG00000027799	false
3959	TF-TG	ENSMUSG00000015846 (TF-TG) ENSMUSG00000027801	false
3960	TF-TG	ENSMUSG00000015846 (TF-TG) ENSMUSG00000027820	false
3961	TF-TG	ENSMUSG00000015846 (TF-TG) ENSMUSG00000027834	false
3962	TF-TG	ENSMUSG00000015846 (TF-TG) ENSMUSG00000027843	false
3963	TF-TG	ENSMUSG00000015846 (TF-TG) ENSMUSG00000027876	false
3964	TF-TG	ENSMUSG00000015846 (TF-TG) ENSMUSG00000027883	false
3965	TF-TG	ENSMUSG00000015846 (TF-TG) ENSMUSG00000027890	false
3966	TF-TG	ENSMUSG00000015846 (TF-TG) ENSMUSG00000027907	false
3967	TF-TG	ENSMUSG00000015846 (TF-TG) ENSMUSG00000027931	false
3968	TF-TG	ENSMUSG00000015846 (TF-TG) ENSMUSG00000027937	false
3969	TF-TG	ENSMUSG00000015846 (TF-TG) ENSMUSG00000027952	false
3970	TF-TG	ENSMUSG00000015846 (TF-TG) ENSMUSG00000027954	false
3971	TF-TG	ENSMUSG00000015846 (TF-TG) ENSMUSG00000027984	false
3972	TF-TG	ENSMUSG00000015846 (TF-TG) ENSMUSG00000027995	false
3973	TF-TG	ENSMUSG00000015846 (TF-TG) ENSMUSG00000028008	false
3974	TF-TG	ENSMUSG00000015846 (TF-TG) ENSMUSG00000028019	false
3975	TF-TG	ENSMUSG00000015846 (TF-TG) ENSMUSG00000028024	false
3976	TF-TG	ENSMUSG00000015846 (TF-TG) ENSMUSG00000028031	false
3977	TF-TG	ENSMUSG00000015846 (TF-TG) ENSMUSG00000028039	false
3978	TF-TG	ENSMUSG00000015846 (TF-TG) ENSMUSG00000028073	false
3979	TF-TG	ENSMUSG00000015846 (TF-TG) ENSMUSG00000028076	false
3980	TF-TG	ENSMUSG00000015846 (TF-TG) ENSMUSG00000028078	false
3981	TF-TG	ENSMUSG00000015846 (TF-TG) ENSMUSG00000028088	false
3982	TF-TG	ENSMUSG00000015846 (TF-TG) ENSMUSG00000028093	false
3983	TF-TG	ENSMUSG00000015846 (TF-TG) ENSMUSG00000028111	false
3984	TF-TG	ENSMUSG00000015846 (TF-TG) ENSMUSG00000028132	false
3985	TF-TG	ENSMUSG00000015846 (TF-TG) ENSMUSG00000028158	false
3986	TF-TG	ENSMUSG00000015846 (TF-TG) ENSMUSG00000028167	false
3987	TF-TG	ENSMUSG00000015846 (TF-TG) ENSMUSG00000028173	false
3988	TF-TG	ENSMUSG00000015846 (TF-TG) ENSMUSG00000028186	false
3989	TF-TG	ENSMUSG00000015846 (TF-TG) ENSMUSG00000028195	false
3990	TF-TG	ENSMUSG00000015846 (TF-TG) ENSMUSG00000028211	false
3991	TF-TG	ENSMUSG00000015846 (TF-TG) ENSMUSG00000028223	false
3992	TF-TG	ENSMUSG00000015846 (TF-TG) ENSMUSG00000028226	false
3993	TF-TG	ENSMUSG00000015846 (TF-TG) ENSMUSG00000028246	false
3994	TF-TG	ENSMUSG00000015846 (TF-TG) ENSMUSG00000028278	false
3995	TF-TG	ENSMUSG00000015846 (TF-TG) ENSMUSG00000028289	false
3996	TF-TG	ENSMUSG00000015846 (TF-TG) ENSMUSG00000028307	false
3997	TF-TG	ENSMUSG00000015846 (TF-TG) ENSMUSG00000028312	false
3998	TF-TG	ENSMUSG00000015846 (TF-TG) ENSMUSG00000028327	false
3999	TF-TG	ENSMUSG00000015846 (TF-TG) ENSMUSG00000028332	false
4000	TF-TG	ENSMUSG00000015846 (TF-TG) ENSMUSG00000028341	false
4001	TF-TG	ENSMUSG00000015846 (TF-TG) ENSMUSG00000028389	false
4002	TF-TG	ENSMUSG00000015846 (TF-TG) ENSMUSG00000028415	false
4003	TF-TG	ENSMUSG00000015846 (TF-TG) ENSMUSG00000028435	false
4004	TF-TG	ENSMUSG00000015846 (TF-TG) ENSMUSG00000028439	false
4005	TF-TG	ENSMUSG00000015846 (TF-TG) ENSMUSG00000028444	false
4006	TF-TG	ENSMUSG00000015846 (TF-TG) ENSMUSG00000028517	false
4007	TF-TG	ENSMUSG00000015846 (TF-TG) ENSMUSG00000028518	false
4008	TF-TG	ENSMUSG00000015846 (TF-TG) ENSMUSG00000028519	false
4009	TF-TG	ENSMUSG00000015846 (TF-TG) ENSMUSG00000028524	false
4010	TF-TG	ENSMUSG00000015846 (TF-TG) ENSMUSG00000028527	false
4011	TF-TG	ENSMUSG00000015846 (TF-TG) ENSMUSG00000028542	false
4012	TF-TG	ENSMUSG00000015846 (TF-TG) ENSMUSG00000028555	false
4013	TF-TG	ENSMUSG00000015846 (TF-TG) ENSMUSG00000028557	false
4014	TF-TG	ENSMUSG00000015846 (TF-TG) ENSMUSG00000028576	false
4015	TF-TG	ENSMUSG00000015846 (TF-TG) ENSMUSG00000028597	false
4016	TF-TG	ENSMUSG00000015846 (TF-TG) ENSMUSG00000028602	false
4017	TF-TG	ENSMUSG00000015846 (TF-TG) ENSMUSG00000028614	false
4018	TF-TG	ENSMUSG00000015846 (TF-TG) ENSMUSG00000028631	false
4019	TF-TG	ENSMUSG00000015846 (TF-TG) ENSMUSG00000028634	false
4020	TF-TG	ENSMUSG00000015846 (TF-TG) ENSMUSG00000028641	false
4021	TF-TG	ENSMUSG00000015846 (TF-TG) ENSMUSG00000028645	false
4022	TF-TG	ENSMUSG00000015846 (TF-TG) ENSMUSG00000028649	false
4023	TF-TG	ENSMUSG00000015846 (TF-TG) ENSMUSG00000028713	false
4024	TF-TG	ENSMUSG00000015846 (TF-TG) ENSMUSG00000028716	false
4025	TF-TG	ENSMUSG00000015846 (TF-TG) ENSMUSG00000028749	false
4026	TF-TG	ENSMUSG00000015846 (TF-TG) ENSMUSG00000028763	false
4027	TF-TG	ENSMUSG00000015846 (TF-TG) ENSMUSG00000028780	false
4028	TF-TG	ENSMUSG00000015846 (TF-TG) ENSMUSG00000028785	false
4029	TF-TG	ENSMUSG00000015846 (TF-TG) ENSMUSG00000028836	false
4030	TF-TG	ENSMUSG00000015846 (TF-TG) ENSMUSG00000028849	false
4031	TF-TG	ENSMUSG00000015846 (TF-TG) ENSMUSG00000028874	false
4032	TF-TG	ENSMUSG00000015846 (TF-TG) ENSMUSG00000028940	false
4033	TF-TG	ENSMUSG00000015846 (TF-TG) ENSMUSG00000028943	false
4034	TF-TG	ENSMUSG00000015846 (TF-TG) ENSMUSG00000028944	false
4035	TF-TG	ENSMUSG00000015846 (TF-TG) ENSMUSG00000028986	false
4036	TF-TG	ENSMUSG00000015846 (TF-TG) ENSMUSG00000028996	false
4037	TF-TG	ENSMUSG00000015846 (TF-TG) ENSMUSG00000029054	false
4038	TF-TG	ENSMUSG00000015846 (TF-TG) ENSMUSG00000029059	false
4039	TF-TG	ENSMUSG00000015846 (TF-TG) ENSMUSG00000029084	false
4040	TF-TG	ENSMUSG00000015846 (TF-TG) ENSMUSG00000029094	false
4041	TF-TG	ENSMUSG00000015846 (TF-TG) ENSMUSG00000029095	false
4042	TF-TG	ENSMUSG00000015846 (TF-TG) ENSMUSG00000029121	false
4043	TF-TG	ENSMUSG00000015846 (TF-TG) ENSMUSG00000029130	false
4044	TF-TG	ENSMUSG00000015846 (TF-TG) ENSMUSG00000029134	false
4045	TF-TG	ENSMUSG00000015846 (TF-TG) ENSMUSG00000029153	false
4046	TF-TG	ENSMUSG00000015846 (TF-TG) ENSMUSG00000029154	false
4047	TF-TG	ENSMUSG00000015846 (TF-TG) ENSMUSG00000029156	false
4048	TF-TG	ENSMUSG00000015846 (TF-TG) ENSMUSG00000029161	false
4049	TF-TG	ENSMUSG00000015846 (TF-TG) ENSMUSG00000029162	false
4050	TF-TG	ENSMUSG00000015846 (TF-TG) ENSMUSG00000029167	false
4051	TF-TG	ENSMUSG00000015846 (TF-TG) ENSMUSG00000029168	false
4052	TF-TG	ENSMUSG00000015846 (TF-TG) ENSMUSG00000029173	false
4053	TF-TG	ENSMUSG00000015846 (TF-TG) ENSMUSG00000029177	false
4054	TF-TG	ENSMUSG00000015846 (TF-TG) ENSMUSG00000029188	false
4055	TF-TG	ENSMUSG00000015846 (TF-TG) ENSMUSG00000029195	false
4056	TF-TG	ENSMUSG00000015846 (TF-TG) ENSMUSG00000029245	false
4057	TF-TG	ENSMUSG00000015846 (TF-TG) ENSMUSG00000029260	false
4058	TF-TG	ENSMUSG00000015846 (TF-TG) ENSMUSG00000029269	false
4059	TF-TG	ENSMUSG00000015846 (TF-TG) ENSMUSG00000029279	false
4060	TF-TG	ENSMUSG00000015846 (TF-TG) ENSMUSG00000029287	false
4061	TF-TG	ENSMUSG00000015846 (TF-TG) ENSMUSG00000029330	false
4062	TF-TG	ENSMUSG00000015846 (TF-TG) ENSMUSG00000029335	false
4063	TF-TG	ENSMUSG00000015846 (TF-TG) ENSMUSG00000029343	false
4064	TF-TG	ENSMUSG00000015846 (TF-TG) ENSMUSG00000029369	false
4065	TF-TG	ENSMUSG00000015846 (TF-TG) ENSMUSG00000029370	false
4066	TF-TG	ENSMUSG00000015846 (TF-TG) ENSMUSG00000029380	false
4067	TF-TG	ENSMUSG00000015846 (TF-TG) ENSMUSG00000029408	false
4068	TF-TG	ENSMUSG00000015846 (TF-TG) ENSMUSG00000029413	false
4069	TF-TG	ENSMUSG00000015846 (TF-TG) ENSMUSG00000029419	false
4070	TF-TG	ENSMUSG00000015846 (TF-TG) ENSMUSG00000029420	false
4071	TF-TG	ENSMUSG00000015846 (TF-TG) ENSMUSG00000029436	false
4072	TF-TG	ENSMUSG00000015846 (TF-TG) ENSMUSG00000029470	false
4073	TF-TG	ENSMUSG00000015846 (TF-TG) ENSMUSG00000029484	false
4074	TF-TG	ENSMUSG00000015846 (TF-TG) ENSMUSG00000029510	false
4075	TF-TG	ENSMUSG00000015846 (TF-TG) ENSMUSG00000029522	false
4076	TF-TG	ENSMUSG00000015846 (TF-TG) ENSMUSG00000029541	false
4077	TF-TG	ENSMUSG00000015846 (TF-TG) ENSMUSG00000029545	false
4078	TF-TG	ENSMUSG00000015846 (TF-TG) ENSMUSG00000029560	false
4079	TF-TG	ENSMUSG00000015846 (TF-TG) ENSMUSG00000029596	false
4080	TF-TG	ENSMUSG00000015846 (TF-TG) ENSMUSG00000029601	false
4081	TF-TG	ENSMUSG00000015846 (TF-TG) ENSMUSG00000029630	false
4082	TF-TG	ENSMUSG00000015846 (TF-TG) ENSMUSG00000029661	false
4083	TF-TG	ENSMUSG00000015846 (TF-TG) ENSMUSG00000029664	false
4084	TF-TG	ENSMUSG00000015846 (TF-TG) ENSMUSG00000029674	false
4085	TF-TG	ENSMUSG00000015846 (TF-TG) ENSMUSG00000029700	false
4086	TF-TG	ENSMUSG00000015846 (TF-TG) ENSMUSG00000029706	false
4087	TF-TG	ENSMUSG00000015846 (TF-TG) ENSMUSG00000029712	false
4088	TF-TG	ENSMUSG00000015846 (TF-TG) ENSMUSG00000029761	false
4089	TF-TG	ENSMUSG00000015846 (TF-TG) ENSMUSG00000029762	false
4090	TF-TG	ENSMUSG00000015846 (TF-TG) ENSMUSG00000029765	false
4091	TF-TG	ENSMUSG00000015846 (TF-TG) ENSMUSG00000029769	false
4092	TF-TG	ENSMUSG00000015846 (TF-TG) ENSMUSG00000029772	false
4093	TF-TG	ENSMUSG00000015846 (TF-TG) ENSMUSG00000029802	false
4094	TF-TG	ENSMUSG00000015846 (TF-TG) ENSMUSG00000029811	false
4095	TF-TG	ENSMUSG00000015846 (TF-TG) ENSMUSG00000029814	false
4096	TF-TG	ENSMUSG00000015846 (TF-TG) ENSMUSG00000029832	false
4097	TF-TG	ENSMUSG00000015846 (TF-TG) ENSMUSG00000029847	false
4098	TF-TG	ENSMUSG00000015846 (TF-TG) ENSMUSG00000029862	false
4099	TF-TG	ENSMUSG00000015846 (TF-TG) ENSMUSG00000029875	false
4100	TF-TG	ENSMUSG00000015846 (TF-TG) ENSMUSG00000029910	false
4101	TF-TG	ENSMUSG00000015846 (TF-TG) ENSMUSG00000029916	false
4102	TF-TG	ENSMUSG00000015846 (TF-TG) ENSMUSG00000029919	false
4103	TF-TG	ENSMUSG00000015846 (TF-TG) ENSMUSG00000029924	false
4104	TF-TG	ENSMUSG00000015846 (TF-TG) ENSMUSG00000030004	false
4105	TF-TG	ENSMUSG00000015846 (TF-TG) ENSMUSG00000030048	false
4106	TF-TG	ENSMUSG00000015846 (TF-TG) ENSMUSG00000030074	false
4107	TF-TG	ENSMUSG00000015846 (TF-TG) ENSMUSG00000030087	false
4108	TF-TG	ENSMUSG00000015846 (TF-TG) ENSMUSG00000030102	false
4109	TF-TG	ENSMUSG00000015846 (TF-TG) ENSMUSG00000030107	false
4110	TF-TG	ENSMUSG00000015846 (TF-TG) ENSMUSG00000030110	false
4111	TF-TG	ENSMUSG00000015846 (TF-TG) ENSMUSG00000030137	false
4112	TF-TG	ENSMUSG00000015846 (TF-TG) ENSMUSG00000030145	false
4113	TF-TG	ENSMUSG00000015846 (TF-TG) ENSMUSG00000030155	false
4114	TF-TG	ENSMUSG00000015846 (TF-TG) ENSMUSG00000030170	false
4115	TF-TG	ENSMUSG00000015846 (TF-TG) ENSMUSG00000030214	false
4116	TF-TG	ENSMUSG00000015846 (TF-TG) ENSMUSG00000030246	false
4117	TF-TG	ENSMUSG00000015846 (TF-TG) ENSMUSG00000030287	false
4118	TF-TG	ENSMUSG00000015846 (TF-TG) ENSMUSG00000030329	false
4119	TF-TG	ENSMUSG00000015846 (TF-TG) ENSMUSG00000030353	false
4120	TF-TG	ENSMUSG00000015846 (TF-TG) ENSMUSG00000030364	false
4121	TF-TG	ENSMUSG00000015846 (TF-TG) ENSMUSG00000030401	false
4122	TF-TG	ENSMUSG00000015846 (TF-TG) ENSMUSG00000030406	false
4123	TF-TG	ENSMUSG00000015846 (TF-TG) ENSMUSG00000030407	false
4124	TF-TG	ENSMUSG00000015846 (TF-TG) ENSMUSG00000030410	false
4125	TF-TG	ENSMUSG00000015846 (TF-TG) ENSMUSG00000030411	false
4126	TF-TG	ENSMUSG00000015846 (TF-TG) ENSMUSG00000030510	false
4127	TF-TG	ENSMUSG00000015846 (TF-TG) ENSMUSG00000030518	false
4128	TF-TG	ENSMUSG00000015846 (TF-TG) ENSMUSG00000030528	false
4129	TF-TG	ENSMUSG00000015846 (TF-TG) ENSMUSG00000030543	false
4130	TF-TG	ENSMUSG00000015846 (TF-TG) ENSMUSG00000030616	false
4131	TF-TG	ENSMUSG00000015846 (TF-TG) ENSMUSG00000030659	false
4132	TF-TG	ENSMUSG00000015846 (TF-TG) ENSMUSG00000030671	false
4133	TF-TG	ENSMUSG00000015846 (TF-TG) ENSMUSG00000030717	false
4134	TF-TG	ENSMUSG00000015846 (TF-TG) ENSMUSG00000030747	false
4135	TF-TG	ENSMUSG00000015846 (TF-TG) ENSMUSG00000030761	false
4136	TF-TG	ENSMUSG00000015846 (TF-TG) ENSMUSG00000030762	false
4137	TF-TG	ENSMUSG00000015846 (TF-TG) ENSMUSG00000030769	false
4138	TF-TG	ENSMUSG00000015846 (TF-TG) ENSMUSG00000030772	false
4139	TF-TG	ENSMUSG00000015846 (TF-TG) ENSMUSG00000030782	false
4140	TF-TG	ENSMUSG00000015846 (TF-TG) ENSMUSG00000030787	false
4141	TF-TG	ENSMUSG00000015846 (TF-TG) ENSMUSG00000030830	false
4142	TF-TG	ENSMUSG00000015846 (TF-TG) ENSMUSG00000030865	false
4143	TF-TG	ENSMUSG00000015846 (TF-TG) ENSMUSG00000030897	false
4144	TF-TG	ENSMUSG00000015846 (TF-TG) ENSMUSG00000030905	false
4145	TF-TG	ENSMUSG00000015846 (TF-TG) ENSMUSG00000031004	false
4146	TF-TG	ENSMUSG00000015846 (TF-TG) ENSMUSG00000031075	false
4147	TF-TG	ENSMUSG00000015846 (TF-TG) ENSMUSG00000031098	false
4148	TF-TG	ENSMUSG00000015846 (TF-TG) ENSMUSG00000031129	false
4149	TF-TG	ENSMUSG00000015846 (TF-TG) ENSMUSG00000031133	false
4150	TF-TG	ENSMUSG00000015846 (TF-TG) ENSMUSG00000031144	false
4151	TF-TG	ENSMUSG00000015846 (TF-TG) ENSMUSG00000031150	false
4152	TF-TG	ENSMUSG00000015846 (TF-TG) ENSMUSG00000031155	false
4153	TF-TG	ENSMUSG00000015846 (TF-TG) ENSMUSG00000031173	false
4154	TF-TG	ENSMUSG00000015846 (TF-TG) ENSMUSG00000031207	false
4155	TF-TG	ENSMUSG00000015846 (TF-TG) ENSMUSG00000031214	false
4156	TF-TG	ENSMUSG00000015846 (TF-TG) ENSMUSG00000031220	false
4157	TF-TG	ENSMUSG00000015846 (TF-TG) ENSMUSG00000031284	false
4158	TF-TG	ENSMUSG00000015846 (TF-TG) ENSMUSG00000031297	false
4159	TF-TG	ENSMUSG00000015846 (TF-TG) ENSMUSG00000031303	false
4160	TF-TG	ENSMUSG00000015846 (TF-TG) ENSMUSG00000031327	false
4161	TF-TG	ENSMUSG00000015846 (TF-TG) ENSMUSG00000031351	false
4162	TF-TG	ENSMUSG00000015846 (TF-TG) ENSMUSG00000031353	false
4163	TF-TG	ENSMUSG00000015846 (TF-TG) ENSMUSG00000031367	false
4164	TF-TG	ENSMUSG00000015846 (TF-TG) ENSMUSG00000031373	false
4165	TF-TG	ENSMUSG00000015846 (TF-TG) ENSMUSG00000031375	false
4166	TF-TG	ENSMUSG00000015846 (TF-TG) ENSMUSG00000031377	false
4167	TF-TG	ENSMUSG00000015846 (TF-TG) ENSMUSG00000031378	false
4168	TF-TG	ENSMUSG00000015846 (TF-TG) ENSMUSG00000031381	false
4169	TF-TG	ENSMUSG00000015846 (TF-TG) ENSMUSG00000031441	false
4170	TF-TG	ENSMUSG00000015846 (TF-TG) ENSMUSG00000031444	false
4171	TF-TG	ENSMUSG00000015846 (TF-TG) ENSMUSG00000031445	false
4172	TF-TG	ENSMUSG00000015846 (TF-TG) ENSMUSG00000031448	false
4173	TF-TG	ENSMUSG00000015846 (TF-TG) ENSMUSG00000031451	false
4174	TF-TG	ENSMUSG00000015846 (TF-TG) ENSMUSG00000031453	false
4175	TF-TG	ENSMUSG00000015846 (TF-TG) ENSMUSG00000031520	false
4176	TF-TG	ENSMUSG00000015846 (TF-TG) ENSMUSG00000031521	false
4177	TF-TG	ENSMUSG00000015846 (TF-TG) ENSMUSG00000031532	false
4178	TF-TG	ENSMUSG00000015846 (TF-TG) ENSMUSG00000031538	false
4179	TF-TG	ENSMUSG00000015846 (TF-TG) ENSMUSG00000031539	false
4180	TF-TG	ENSMUSG00000015846 (TF-TG) ENSMUSG00000031558	false
4181	TF-TG	ENSMUSG00000015846 (TF-TG) ENSMUSG00000031562	false
4182	TF-TG	ENSMUSG00000015846 (TF-TG) ENSMUSG00000031576	false
4183	TF-TG	ENSMUSG00000015846 (TF-TG) ENSMUSG00000031584	false
4184	TF-TG	ENSMUSG00000015846 (TF-TG) ENSMUSG00000031586	false
4185	TF-TG	ENSMUSG00000015846 (TF-TG) ENSMUSG00000031595	false
4186	TF-TG	ENSMUSG00000015846 (TF-TG) ENSMUSG00000031626	false
4187	TF-TG	ENSMUSG00000015846 (TF-TG) ENSMUSG00000031629	false
4188	TF-TG	ENSMUSG00000015846 (TF-TG) ENSMUSG00000031635	false
4189	TF-TG	ENSMUSG00000015846 (TF-TG) ENSMUSG00000031644	false
4190	TF-TG	ENSMUSG00000015846 (TF-TG) ENSMUSG00000031647	false
4191	TF-TG	ENSMUSG00000015846 (TF-TG) ENSMUSG00000031661	false
4192	TF-TG	ENSMUSG00000015846 (TF-TG) ENSMUSG00000031668	false
4193	TF-TG	ENSMUSG00000015846 (TF-TG) ENSMUSG00000031698	false
4194	TF-TG	ENSMUSG00000015846 (TF-TG) ENSMUSG00000031712	false
4195	TF-TG	ENSMUSG00000015846 (TF-TG) ENSMUSG00000031725	false
4196	TF-TG	ENSMUSG00000015846 (TF-TG) ENSMUSG00000031760	false
4197	TF-TG	ENSMUSG00000015846 (TF-TG) ENSMUSG00000031765	false
4198	TF-TG	ENSMUSG00000015846 (TF-TG) ENSMUSG00000031767	false
4199	TF-TG	ENSMUSG00000015846 (TF-TG) ENSMUSG00000031785	false
4200	TF-TG	ENSMUSG00000015846 (TF-TG) ENSMUSG00000031788	false
4201	TF-TG	ENSMUSG00000015846 (TF-TG) ENSMUSG00000031790	false
4202	TF-TG	ENSMUSG00000015846 (TF-TG) ENSMUSG00000031791	false
4203	TF-TG	ENSMUSG00000015846 (TF-TG) ENSMUSG00000031827	false
4204	TF-TG	ENSMUSG00000015846 (TF-TG) ENSMUSG00000031833	false
4205	TF-TG	ENSMUSG00000015846 (TF-TG) ENSMUSG00000031841	false
4206	TF-TG	ENSMUSG00000015846 (TF-TG) ENSMUSG00000031845	false
4207	TF-TG	ENSMUSG00000015846 (TF-TG) ENSMUSG00000031853	false
4208	TF-TG	ENSMUSG00000015846 (TF-TG) ENSMUSG00000031875	false
4209	TF-TG	ENSMUSG00000015846 (TF-TG) ENSMUSG00000031877	false
4210	TF-TG	ENSMUSG00000015846 (TF-TG) ENSMUSG00000031881	false
4211	TF-TG	ENSMUSG00000015846 (TF-TG) ENSMUSG00000031886	false
4212	TF-TG	ENSMUSG00000015846 (TF-TG) ENSMUSG00000031891	false
4213	TF-TG	ENSMUSG00000015846 (TF-TG) ENSMUSG00000031902	false
4214	TF-TG	ENSMUSG00000015846 (TF-TG) ENSMUSG00000031903	false
4215	TF-TG	ENSMUSG00000015846 (TF-TG) ENSMUSG00000031919	false
4216	TF-TG	ENSMUSG00000015846 (TF-TG) ENSMUSG00000031925	false
4217	TF-TG	ENSMUSG00000015846 (TF-TG) ENSMUSG00000031937	false
4218	TF-TG	ENSMUSG00000015846 (TF-TG) ENSMUSG00000031951	false
4219	TF-TG	ENSMUSG00000015846 (TF-TG) ENSMUSG00000031957	false
4220	TF-TG	ENSMUSG00000015846 (TF-TG) ENSMUSG00000031980	false
4221	TF-TG	ENSMUSG00000015846 (TF-TG) ENSMUSG00000031987	false
4222	TF-TG	ENSMUSG00000015846 (TF-TG) ENSMUSG00000032014	false
4223	TF-TG	ENSMUSG00000015846 (TF-TG) ENSMUSG00000032017	false
4224	TF-TG	ENSMUSG00000015846 (TF-TG) ENSMUSG00000032018	false
4225	TF-TG	ENSMUSG00000015846 (TF-TG) ENSMUSG00000032026	false
4226	TF-TG	ENSMUSG00000015846 (TF-TG) ENSMUSG00000032033	false
4227	TF-TG	ENSMUSG00000015846 (TF-TG) ENSMUSG00000032035	false
4228	TF-TG	ENSMUSG00000015846 (TF-TG) ENSMUSG00000032047	false
4229	TF-TG	ENSMUSG00000015846 (TF-TG) ENSMUSG00000032064	false
4230	TF-TG	ENSMUSG00000015846 (TF-TG) ENSMUSG00000032081	false
4231	TF-TG	ENSMUSG00000015846 (TF-TG) ENSMUSG00000032083	false
4232	TF-TG	ENSMUSG00000015846 (TF-TG) ENSMUSG00000032085	false
4233	TF-TG	ENSMUSG00000015846 (TF-TG) ENSMUSG00000032092	false
4234	TF-TG	ENSMUSG00000015846 (TF-TG) ENSMUSG00000032098	false
4235	TF-TG	ENSMUSG00000015846 (TF-TG) ENSMUSG00000032184	false
4236	TF-TG	ENSMUSG00000015846 (TF-TG) ENSMUSG00000032186	false
4237	TF-TG	ENSMUSG00000015846 (TF-TG) ENSMUSG00000032202	false
4238	TF-TG	ENSMUSG00000015846 (TF-TG) ENSMUSG00000032218	false
4239	TF-TG	ENSMUSG00000015846 (TF-TG) ENSMUSG00000032238	false
4240	TF-TG	ENSMUSG00000015846 (TF-TG) ENSMUSG00000032245	false
4241	TF-TG	ENSMUSG00000015846 (TF-TG) ENSMUSG00000032251	false
4242	TF-TG	ENSMUSG00000015846 (TF-TG) ENSMUSG00000032278	false
4243	TF-TG	ENSMUSG00000015846 (TF-TG) ENSMUSG00000032285	false
4244	TF-TG	ENSMUSG00000015846 (TF-TG) ENSMUSG00000032289	false
4245	TF-TG	ENSMUSG00000015846 (TF-TG) ENSMUSG00000032294	false
4246	TF-TG	ENSMUSG00000015846 (TF-TG) ENSMUSG00000032297	false
4247	TF-TG	ENSMUSG00000015846 (TF-TG) ENSMUSG00000032314	false
4248	TF-TG	ENSMUSG00000015846 (TF-TG) ENSMUSG00000032315	false
4249	TF-TG	ENSMUSG00000015846 (TF-TG) ENSMUSG00000032322	false
4250	TF-TG	ENSMUSG00000015846 (TF-TG) ENSMUSG00000032338	false
4251	TF-TG	ENSMUSG00000015846 (TF-TG) ENSMUSG00000032353	false
4252	TF-TG	ENSMUSG00000015846 (TF-TG) ENSMUSG00000032356	false
4253	TF-TG	ENSMUSG00000015846 (TF-TG) ENSMUSG00000032357	false
4254	TF-TG	ENSMUSG00000015846 (TF-TG) ENSMUSG00000032358	false
4255	TF-TG	ENSMUSG00000015846 (TF-TG) ENSMUSG00000032363	false
4256	TF-TG	ENSMUSG00000015846 (TF-TG) ENSMUSG00000032373	false
4257	TF-TG	ENSMUSG00000015846 (TF-TG) ENSMUSG00000032377	false
4258	TF-TG	ENSMUSG00000015846 (TF-TG) ENSMUSG00000032380	false
4259	TF-TG	ENSMUSG00000015846 (TF-TG) ENSMUSG00000032400	false
4260	TF-TG	ENSMUSG00000015846 (TF-TG) ENSMUSG00000032411	false
4261	TF-TG	ENSMUSG00000015846 (TF-TG) ENSMUSG00000032431	false
4262	TF-TG	ENSMUSG00000015846 (TF-TG) ENSMUSG00000032454	false
4263	TF-TG	ENSMUSG00000015846 (TF-TG) ENSMUSG00000032470	false
4264	TF-TG	ENSMUSG00000015846 (TF-TG) ENSMUSG00000032482	false
4265	TF-TG	ENSMUSG00000015846 (TF-TG) ENSMUSG00000032500	false
4266	TF-TG	ENSMUSG00000015846 (TF-TG) ENSMUSG00000032502	false
4267	TF-TG	ENSMUSG00000015846 (TF-TG) ENSMUSG00000032528	false
4268	TF-TG	ENSMUSG00000015846 (TF-TG) ENSMUSG00000032531	false
4269	TF-TG	ENSMUSG00000015846 (TF-TG) ENSMUSG00000032532	false
4270	TF-TG	ENSMUSG00000015846 (TF-TG) ENSMUSG00000032549	false
4271	TF-TG	ENSMUSG00000015846 (TF-TG) ENSMUSG00000032561	false
4272	TF-TG	ENSMUSG00000015846 (TF-TG) ENSMUSG00000032625	false
4273	TF-TG	ENSMUSG00000015846 (TF-TG) ENSMUSG00000032656	false
4274	TF-TG	ENSMUSG00000015846 (TF-TG) ENSMUSG00000032666	false
4275	TF-TG	ENSMUSG00000015846 (TF-TG) ENSMUSG00000032679	false
4276	TF-TG	ENSMUSG00000015846 (TF-TG) ENSMUSG00000032702	false
4277	TF-TG	ENSMUSG00000015846 (TF-TG) ENSMUSG00000032717	false
4278	TF-TG	ENSMUSG00000015846 (TF-TG) ENSMUSG00000032733	false
4279	TF-TG	ENSMUSG00000015846 (TF-TG) ENSMUSG00000032740	false
4280	TF-TG	ENSMUSG00000015846 (TF-TG) ENSMUSG00000032754	false
4281	TF-TG	ENSMUSG00000015846 (TF-TG) ENSMUSG00000032769	false
4282	TF-TG	ENSMUSG00000015846 (TF-TG) ENSMUSG00000032783	false
4283	TF-TG	ENSMUSG00000015846 (TF-TG) ENSMUSG00000032807	false
4284	TF-TG	ENSMUSG00000015846 (TF-TG) ENSMUSG00000032808	false
4285	TF-TG	ENSMUSG00000015846 (TF-TG) ENSMUSG00000032849	false
4286	TF-TG	ENSMUSG00000015846 (TF-TG) ENSMUSG00000032852	false
4287	TF-TG	ENSMUSG00000015846 (TF-TG) ENSMUSG00000032854	false
4288	TF-TG	ENSMUSG00000015846 (TF-TG) ENSMUSG00000032855	false
4289	TF-TG	ENSMUSG00000015846 (TF-TG) ENSMUSG00000032860	false
4290	TF-TG	ENSMUSG00000015846 (TF-TG) ENSMUSG00000032883	false
4291	TF-TG	ENSMUSG00000015846 (TF-TG) ENSMUSG00000032892	false
4292	TF-TG	ENSMUSG00000015846 (TF-TG) ENSMUSG00000032902	false
4293	TF-TG	ENSMUSG00000015846 (TF-TG) ENSMUSG00000032908	false
4294	TF-TG	ENSMUSG00000015846 (TF-TG) ENSMUSG00000032940	false
4295	TF-TG	ENSMUSG00000015846 (TF-TG) ENSMUSG00000032965	false
4296	TF-TG	ENSMUSG00000015846 (TF-TG) ENSMUSG00000032978	false
4297	TF-TG	ENSMUSG00000015846 (TF-TG) ENSMUSG00000033033	false
4298	TF-TG	ENSMUSG00000015846 (TF-TG) ENSMUSG00000033061	false
4299	TF-TG	ENSMUSG00000015846 (TF-TG) ENSMUSG00000033083	false
4300	TF-TG	ENSMUSG00000015846 (TF-TG) ENSMUSG00000033105	false
4301	TF-TG	ENSMUSG00000015846 (TF-TG) ENSMUSG00000033107	false
4302	TF-TG	ENSMUSG00000015846 (TF-TG) ENSMUSG00000033147	false
4303	TF-TG	ENSMUSG00000015846 (TF-TG) ENSMUSG00000033152	false
4304	TF-TG	ENSMUSG00000015846 (TF-TG) ENSMUSG00000033161	false
4305	TF-TG	ENSMUSG00000015846 (TF-TG) ENSMUSG00000033177	false
4306	TF-TG	ENSMUSG00000015846 (TF-TG) ENSMUSG00000033209	false
4307	TF-TG	ENSMUSG00000015846 (TF-TG) ENSMUSG00000033213	false
4308	TF-TG	ENSMUSG00000015846 (TF-TG) ENSMUSG00000033256	false
4309	TF-TG	ENSMUSG00000015846 (TF-TG) ENSMUSG00000033278	false
4310	TF-TG	ENSMUSG00000015846 (TF-TG) ENSMUSG00000033287	false
4311	TF-TG	ENSMUSG00000015846 (TF-TG) ENSMUSG00000033307	false
4312	TF-TG	ENSMUSG00000015846 (TF-TG) ENSMUSG00000033308	false
4313	TF-TG	ENSMUSG00000015846 (TF-TG) ENSMUSG00000033318	false
4314	TF-TG	ENSMUSG00000015846 (TF-TG) ENSMUSG00000033379	false
4315	TF-TG	ENSMUSG00000015846 (TF-TG) ENSMUSG00000033389	false
4316	TF-TG	ENSMUSG00000015846 (TF-TG) ENSMUSG00000033453	false
4317	TF-TG	ENSMUSG00000015846 (TF-TG) ENSMUSG00000033491	false
4318	TF-TG	ENSMUSG00000015846 (TF-TG) ENSMUSG00000033530	false
4319	TF-TG	ENSMUSG00000015846 (TF-TG) ENSMUSG00000033545	false
4320	TF-TG	ENSMUSG00000015846 (TF-TG) ENSMUSG00000033579	false
4321	TF-TG	ENSMUSG00000015846 (TF-TG) ENSMUSG00000033581	false
4322	TF-TG	ENSMUSG00000015846 (TF-TG) ENSMUSG00000033590	false
4323	TF-TG	ENSMUSG00000015846 (TF-TG) ENSMUSG00000033610	false
4324	TF-TG	ENSMUSG00000015846 (TF-TG) ENSMUSG00000033624	false
4325	TF-TG	ENSMUSG00000015846 (TF-TG) ENSMUSG00000033634	false
4326	TF-TG	ENSMUSG00000015846 (TF-TG) ENSMUSG00000033644	false
4327	TF-TG	ENSMUSG00000015846 (TF-TG) ENSMUSG00000033684	false
4328	TF-TG	ENSMUSG00000015846 (TF-TG) ENSMUSG00000033685	false
4329	TF-TG	ENSMUSG00000015846 (TF-TG) ENSMUSG00000033705	false
4330	TF-TG	ENSMUSG00000015846 (TF-TG) ENSMUSG00000033717	false
4331	TF-TG	ENSMUSG00000015846 (TF-TG) ENSMUSG00000033740	false
4332	TF-TG	ENSMUSG00000015846 (TF-TG) ENSMUSG00000033825	false
4333	TF-TG	ENSMUSG00000015846 (TF-TG) ENSMUSG00000033854	false
4334	TF-TG	ENSMUSG00000015846 (TF-TG) ENSMUSG00000033871	false
4335	TF-TG	ENSMUSG00000015846 (TF-TG) ENSMUSG00000033898	false
4336	TF-TG	ENSMUSG00000015846 (TF-TG) ENSMUSG00000033900	false
4337	TF-TG	ENSMUSG00000015846 (TF-TG) ENSMUSG00000033917	false
4338	TF-TG	ENSMUSG00000015846 (TF-TG) ENSMUSG00000033949	false
4339	TF-TG	ENSMUSG00000015846 (TF-TG) ENSMUSG00000033952	false
4340	TF-TG	ENSMUSG00000015846 (TF-TG) ENSMUSG00000034006	false
4341	TF-TG	ENSMUSG00000015846 (TF-TG) ENSMUSG00000034116	false
4342	TF-TG	ENSMUSG00000015846 (TF-TG) ENSMUSG00000034118	false
4343	TF-TG	ENSMUSG00000015846 (TF-TG) ENSMUSG00000034164	false
4344	TF-TG	ENSMUSG00000015846 (TF-TG) ENSMUSG00000034227	false
4345	TF-TG	ENSMUSG00000015846 (TF-TG) ENSMUSG00000034265	false
4346	TF-TG	ENSMUSG00000015846 (TF-TG) ENSMUSG00000034285	false
4347	TF-TG	ENSMUSG00000015846 (TF-TG) ENSMUSG00000034353	false
4348	TF-TG	ENSMUSG00000015846 (TF-TG) ENSMUSG00000034371	false
4349	TF-TG	ENSMUSG00000015846 (TF-TG) ENSMUSG00000034379	false
4350	TF-TG	ENSMUSG00000015846 (TF-TG) ENSMUSG00000034401	false
4351	TF-TG	ENSMUSG00000015846 (TF-TG) ENSMUSG00000034413	false
4352	TF-TG	ENSMUSG00000015846 (TF-TG) ENSMUSG00000034449	false
4353	TF-TG	ENSMUSG00000015846 (TF-TG) ENSMUSG00000034450	false
4354	TF-TG	ENSMUSG00000015846 (TF-TG) ENSMUSG00000034472	false
4355	TF-TG	ENSMUSG00000015846 (TF-TG) ENSMUSG00000034528	false
4356	TF-TG	ENSMUSG00000015846 (TF-TG) ENSMUSG00000034538	false
4357	TF-TG	ENSMUSG00000015846 (TF-TG) ENSMUSG00000034573	false
4358	TF-TG	ENSMUSG00000015846 (TF-TG) ENSMUSG00000034579	false
4359	TF-TG	ENSMUSG00000015846 (TF-TG) ENSMUSG00000034586	false
4360	TF-TG	ENSMUSG00000015846 (TF-TG) ENSMUSG00000034593	false
4361	TF-TG	ENSMUSG00000015846 (TF-TG) ENSMUSG00000034634	false
4362	TF-TG	ENSMUSG00000015846 (TF-TG) ENSMUSG00000034648	false
4363	TF-TG	ENSMUSG00000015846 (TF-TG) ENSMUSG00000034656	false
4364	TF-TG	ENSMUSG00000015846 (TF-TG) ENSMUSG00000034663	false
4365	TF-TG	ENSMUSG00000015846 (TF-TG) ENSMUSG00000034675	false
4366	TF-TG	ENSMUSG00000015846 (TF-TG) ENSMUSG00000034684	false
4367	TF-TG	ENSMUSG00000015846 (TF-TG) ENSMUSG00000034687	false
4368	TF-TG	ENSMUSG00000015846 (TF-TG) ENSMUSG00000034724	false
4369	TF-TG	ENSMUSG00000015846 (TF-TG) ENSMUSG00000034768	false
4370	TF-TG	ENSMUSG00000015846 (TF-TG) ENSMUSG00000034773	false
4371	TF-TG	ENSMUSG00000015846 (TF-TG) ENSMUSG00000034781	false
4372	TF-TG	ENSMUSG00000015846 (TF-TG) ENSMUSG00000034785	false
4373	TF-TG	ENSMUSG00000015846 (TF-TG) ENSMUSG00000034825	false
4374	TF-TG	ENSMUSG00000015846 (TF-TG) ENSMUSG00000034853	false
4375	TF-TG	ENSMUSG00000015846 (TF-TG) ENSMUSG00000034858	false
4376	TF-TG	ENSMUSG00000015846 (TF-TG) ENSMUSG00000034863	false
4377	TF-TG	ENSMUSG00000015846 (TF-TG) ENSMUSG00000034981	false
4378	TF-TG	ENSMUSG00000015846 (TF-TG) ENSMUSG00000035041	false
4379	TF-TG	ENSMUSG00000015846 (TF-TG) ENSMUSG00000035062	false
4380	TF-TG	ENSMUSG00000015846 (TF-TG) ENSMUSG00000035095	false
4381	TF-TG	ENSMUSG00000015846 (TF-TG) ENSMUSG00000035105	false
4382	TF-TG	ENSMUSG00000015846 (TF-TG) ENSMUSG00000035107	false
4383	TF-TG	ENSMUSG00000015846 (TF-TG) ENSMUSG00000035109	false
4384	TF-TG	ENSMUSG00000015846 (TF-TG) ENSMUSG00000035158	false
4385	TF-TG	ENSMUSG00000015846 (TF-TG) ENSMUSG00000035164	false
4386	TF-TG	ENSMUSG00000015846 (TF-TG) ENSMUSG00000035181	false
4387	TF-TG	ENSMUSG00000015846 (TF-TG) ENSMUSG00000035226	false
4388	TF-TG	ENSMUSG00000015846 (TF-TG) ENSMUSG00000035235	false
4389	TF-TG	ENSMUSG00000015846 (TF-TG) ENSMUSG00000035239	false
4390	TF-TG	ENSMUSG00000015846 (TF-TG) ENSMUSG00000035246	false
4391	TF-TG	ENSMUSG00000015846 (TF-TG) ENSMUSG00000035273	false
4392	TF-TG	ENSMUSG00000015846 (TF-TG) ENSMUSG00000035277	false
4393	TF-TG	ENSMUSG00000015846 (TF-TG) ENSMUSG00000035279	false
4394	TF-TG	ENSMUSG00000015846 (TF-TG) ENSMUSG00000035299	false
4395	TF-TG	ENSMUSG00000015846 (TF-TG) ENSMUSG00000035357	false
4396	TF-TG	ENSMUSG00000015846 (TF-TG) ENSMUSG00000035390	false
4397	TF-TG	ENSMUSG00000015846 (TF-TG) ENSMUSG00000035431	false
4398	TF-TG	ENSMUSG00000015846 (TF-TG) ENSMUSG00000035441	false
4399	TF-TG	ENSMUSG00000015846 (TF-TG) ENSMUSG00000035451	false
4400	TF-TG	ENSMUSG00000015846 (TF-TG) ENSMUSG00000035473	false
4401	TF-TG	ENSMUSG00000015846 (TF-TG) ENSMUSG00000035504	false
4402	TF-TG	ENSMUSG00000015846 (TF-TG) ENSMUSG00000035506	false
4403	TF-TG	ENSMUSG00000015846 (TF-TG) ENSMUSG00000035509	false
4404	TF-TG	ENSMUSG00000015846 (TF-TG) ENSMUSG00000035561	false
4405	TF-TG	ENSMUSG00000015846 (TF-TG) ENSMUSG00000035606	false
4406	TF-TG	ENSMUSG00000015846 (TF-TG) ENSMUSG00000035637	false
4407	TF-TG	ENSMUSG00000015846 (TF-TG) ENSMUSG00000035642	false
4408	TF-TG	ENSMUSG00000015846 (TF-TG) ENSMUSG00000035683	false
4409	TF-TG	ENSMUSG00000015846 (TF-TG) ENSMUSG00000035699	false
4410	TF-TG	ENSMUSG00000015846 (TF-TG) ENSMUSG00000035711	false
4411	TF-TG	ENSMUSG00000015846 (TF-TG) ENSMUSG00000035722	false
4412	TF-TG	ENSMUSG00000015846 (TF-TG) ENSMUSG00000035780	false
4413	TF-TG	ENSMUSG00000015846 (TF-TG) ENSMUSG00000035783	false
4414	TF-TG	ENSMUSG00000015846 (TF-TG) ENSMUSG00000035811	false
4415	TF-TG	ENSMUSG00000015846 (TF-TG) ENSMUSG00000035847	false
4416	TF-TG	ENSMUSG00000015846 (TF-TG) ENSMUSG00000035849	false
4417	TF-TG	ENSMUSG00000015846 (TF-TG) ENSMUSG00000035863	false
4418	TF-TG	ENSMUSG00000015846 (TF-TG) ENSMUSG00000035896	false
4419	TF-TG	ENSMUSG00000015846 (TF-TG) ENSMUSG00000035900	false
4420	TF-TG	ENSMUSG00000015846 (TF-TG) ENSMUSG00000035901	false
4421	TF-TG	ENSMUSG00000015846 (TF-TG) ENSMUSG00000035930	false
4422	TF-TG	ENSMUSG00000015846 (TF-TG) ENSMUSG00000035967	false
4423	TF-TG	ENSMUSG00000015846 (TF-TG) ENSMUSG00000035984	false
4424	TF-TG	ENSMUSG00000015846 (TF-TG) ENSMUSG00000036022	false
4425	TF-TG	ENSMUSG00000015846 (TF-TG) ENSMUSG00000036036	false
4426	TF-TG	ENSMUSG00000015846 (TF-TG) ENSMUSG00000036053	false
4427	TF-TG	ENSMUSG00000015846 (TF-TG) ENSMUSG00000036067	false
4428	TF-TG	ENSMUSG00000015846 (TF-TG) ENSMUSG00000036123	false
4429	TF-TG	ENSMUSG00000015846 (TF-TG) ENSMUSG00000036151	false
4430	TF-TG	ENSMUSG00000015846 (TF-TG) ENSMUSG00000036181	false
4431	TF-TG	ENSMUSG00000015846 (TF-TG) ENSMUSG00000036216	false
4432	TF-TG	ENSMUSG00000015846 (TF-TG) ENSMUSG00000036225	false
4433	TF-TG	ENSMUSG00000015846 (TF-TG) ENSMUSG00000036249	false
4434	TF-TG	ENSMUSG00000015846 (TF-TG) ENSMUSG00000036256	false
4435	TF-TG	ENSMUSG00000015846 (TF-TG) ENSMUSG00000036264	false
4436	TF-TG	ENSMUSG00000015846 (TF-TG) ENSMUSG00000036298	false
4437	TF-TG	ENSMUSG00000015846 (TF-TG) ENSMUSG00000036306	false
4438	TF-TG	ENSMUSG00000015846 (TF-TG) ENSMUSG00000036368	false
4439	TF-TG	ENSMUSG00000015846 (TF-TG) ENSMUSG00000036437	false
4440	TF-TG	ENSMUSG00000015846 (TF-TG) ENSMUSG00000036492	false
4441	TF-TG	ENSMUSG00000015846 (TF-TG) ENSMUSG00000036500	false
4442	TF-TG	ENSMUSG00000015846 (TF-TG) ENSMUSG00000036526	false
4443	TF-TG	ENSMUSG00000015846 (TF-TG) ENSMUSG00000036564	false
4444	TF-TG	ENSMUSG00000015846 (TF-TG) ENSMUSG00000036599	false
4445	TF-TG	ENSMUSG00000015846 (TF-TG) ENSMUSG00000036667	false
4446	TF-TG	ENSMUSG00000015846 (TF-TG) ENSMUSG00000036745	false
4447	TF-TG	ENSMUSG00000015846 (TF-TG) ENSMUSG00000036766	false
4448	TF-TG	ENSMUSG00000015846 (TF-TG) ENSMUSG00000036782	false
4449	TF-TG	ENSMUSG00000015846 (TF-TG) ENSMUSG00000036813	false
4450	TF-TG	ENSMUSG00000015846 (TF-TG) ENSMUSG00000036832	false
4451	TF-TG	ENSMUSG00000015846 (TF-TG) ENSMUSG00000036863	false
4452	TF-TG	ENSMUSG00000015846 (TF-TG) ENSMUSG00000036872	false
4453	TF-TG	ENSMUSG00000015846 (TF-TG) ENSMUSG00000036875	false
4454	TF-TG	ENSMUSG00000015846 (TF-TG) ENSMUSG00000036880	false
4455	TF-TG	ENSMUSG00000015846 (TF-TG) ENSMUSG00000036887	false
4456	TF-TG	ENSMUSG00000015846 (TF-TG) ENSMUSG00000036892	false
4457	TF-TG	ENSMUSG00000015846 (TF-TG) ENSMUSG00000036912	false
4458	TF-TG	ENSMUSG00000015846 (TF-TG) ENSMUSG00000036913	false
4459	TF-TG	ENSMUSG00000015846 (TF-TG) ENSMUSG00000036923	false
4460	TF-TG	ENSMUSG00000015846 (TF-TG) ENSMUSG00000036932	false
4461	TF-TG	ENSMUSG00000015846 (TF-TG) ENSMUSG00000036944	false
4462	TF-TG	ENSMUSG00000015846 (TF-TG) ENSMUSG00000036989	false
4463	TF-TG	ENSMUSG00000015846 (TF-TG) ENSMUSG00000037005	false
4464	TF-TG	ENSMUSG00000015846 (TF-TG) ENSMUSG00000037032	false
4465	TF-TG	ENSMUSG00000015846 (TF-TG) ENSMUSG00000037035	false
4466	TF-TG	ENSMUSG00000015846 (TF-TG) ENSMUSG00000037071	false
4467	TF-TG	ENSMUSG00000015846 (TF-TG) ENSMUSG00000037106	false
4468	TF-TG	ENSMUSG00000015846 (TF-TG) ENSMUSG00000037159	false
4469	TF-TG	ENSMUSG00000015846 (TF-TG) ENSMUSG00000037161	false
4470	TF-TG	ENSMUSG00000015846 (TF-TG) ENSMUSG00000037169	false
4471	TF-TG	ENSMUSG00000015846 (TF-TG) ENSMUSG00000037188	false
4472	TF-TG	ENSMUSG00000015846 (TF-TG) ENSMUSG00000037217	false
4473	TF-TG	ENSMUSG00000015846 (TF-TG) ENSMUSG00000037235	false
4474	TF-TG	ENSMUSG00000015846 (TF-TG) ENSMUSG00000037315	false
4475	TF-TG	ENSMUSG00000015846 (TF-TG) ENSMUSG00000037348	false
4476	TF-TG	ENSMUSG00000015846 (TF-TG) ENSMUSG00000037379	false
4477	TF-TG	ENSMUSG00000015846 (TF-TG) ENSMUSG00000037386	false
4478	TF-TG	ENSMUSG00000015846 (TF-TG) ENSMUSG00000037405	false
4479	TF-TG	ENSMUSG00000015846 (TF-TG) ENSMUSG00000037428	false
4480	TF-TG	ENSMUSG00000015846 (TF-TG) ENSMUSG00000037440	false
4481	TF-TG	ENSMUSG00000015846 (TF-TG) ENSMUSG00000037447	false
4482	TF-TG	ENSMUSG00000015846 (TF-TG) ENSMUSG00000037493	false
4483	TF-TG	ENSMUSG00000015846 (TF-TG) ENSMUSG00000037509	false
4484	TF-TG	ENSMUSG00000015846 (TF-TG) ENSMUSG00000037541	false
4485	TF-TG	ENSMUSG00000015846 (TF-TG) ENSMUSG00000037568	false
4486	TF-TG	ENSMUSG00000015846 (TF-TG) ENSMUSG00000037579	false
4487	TF-TG	ENSMUSG00000015846 (TF-TG) ENSMUSG00000037583	false
4488	TF-TG	ENSMUSG00000015846 (TF-TG) ENSMUSG00000037594	false
4489	TF-TG	ENSMUSG00000015846 (TF-TG) ENSMUSG00000037606	false
4490	TF-TG	ENSMUSG00000015846 (TF-TG) ENSMUSG00000037617	false
4491	TF-TG	ENSMUSG00000015846 (TF-TG) ENSMUSG00000037621	false
4492	TF-TG	ENSMUSG00000015846 (TF-TG) ENSMUSG00000037624	false
4493	TF-TG	ENSMUSG00000015846 (TF-TG) ENSMUSG00000037628	false
4494	TF-TG	ENSMUSG00000015846 (TF-TG) ENSMUSG00000037636	false
4495	TF-TG	ENSMUSG00000015846 (TF-TG) ENSMUSG00000037649	false
4496	TF-TG	ENSMUSG00000015846 (TF-TG) ENSMUSG00000037664	false
4497	TF-TG	ENSMUSG00000015846 (TF-TG) ENSMUSG00000037679	false
4498	TF-TG	ENSMUSG00000015846 (TF-TG) ENSMUSG00000037686	false
4499	TF-TG	ENSMUSG00000015846 (TF-TG) ENSMUSG00000037709	false
4500	TF-TG	ENSMUSG00000015846 (TF-TG) ENSMUSG00000037712	false
4501	TF-TG	ENSMUSG00000015846 (TF-TG) ENSMUSG00000037736	false
4502	TF-TG	ENSMUSG00000015846 (TF-TG) ENSMUSG00000037754	false
4503	TF-TG	ENSMUSG00000015846 (TF-TG) ENSMUSG00000037784	false
4504	TF-TG	ENSMUSG00000015846 (TF-TG) ENSMUSG00000037797	false
4505	TF-TG	ENSMUSG00000015846 (TF-TG) ENSMUSG00000037820	false
4506	TF-TG	ENSMUSG00000015846 (TF-TG) ENSMUSG00000037852	false
4507	TF-TG	ENSMUSG00000015846 (TF-TG) ENSMUSG00000037855	false
4508	TF-TG	ENSMUSG00000015846 (TF-TG) ENSMUSG00000037905	false
4509	TF-TG	ENSMUSG00000015846 (TF-TG) ENSMUSG00000037936	false
4510	TF-TG	ENSMUSG00000015846 (TF-TG) ENSMUSG00000037942	false
4511	TF-TG	ENSMUSG00000015846 (TF-TG) ENSMUSG00000037946	false
4512	TF-TG	ENSMUSG00000015846 (TF-TG) ENSMUSG00000037949	false
4513	TF-TG	ENSMUSG00000015846 (TF-TG) ENSMUSG00000037953	false
4514	TF-TG	ENSMUSG00000015846 (TF-TG) ENSMUSG00000037989	false
4515	TF-TG	ENSMUSG00000015846 (TF-TG) ENSMUSG00000037991	false
4516	TF-TG	ENSMUSG00000015846 (TF-TG) ENSMUSG00000037994	false
4517	TF-TG	ENSMUSG00000015846 (TF-TG) ENSMUSG00000038010	false
4518	TF-TG	ENSMUSG00000015846 (TF-TG) ENSMUSG00000038042	false
4519	TF-TG	ENSMUSG00000015846 (TF-TG) ENSMUSG00000038112	false
4520	TF-TG	ENSMUSG00000015846 (TF-TG) ENSMUSG00000038175	false
4521	TF-TG	ENSMUSG00000015846 (TF-TG) ENSMUSG00000038181	false
4522	TF-TG	ENSMUSG00000015846 (TF-TG) ENSMUSG00000038255	false
4523	TF-TG	ENSMUSG00000015846 (TF-TG) ENSMUSG00000038286	false
4524	TF-TG	ENSMUSG00000015846 (TF-TG) ENSMUSG00000038296	false
4525	TF-TG	ENSMUSG00000015846 (TF-TG) ENSMUSG00000038305	false
4526	TF-TG	ENSMUSG00000015846 (TF-TG) ENSMUSG00000038312	false
4527	TF-TG	ENSMUSG00000015846 (TF-TG) ENSMUSG00000038319	false
4528	TF-TG	ENSMUSG00000015846 (TF-TG) ENSMUSG00000038349	false
4529	TF-TG	ENSMUSG00000015846 (TF-TG) ENSMUSG00000038354	false
4530	TF-TG	ENSMUSG00000015846 (TF-TG) ENSMUSG00000038371	false
4531	TF-TG	ENSMUSG00000015846 (TF-TG) ENSMUSG00000038379	false
4532	TF-TG	ENSMUSG00000015846 (TF-TG) ENSMUSG00000038390	false
4533	TF-TG	ENSMUSG00000015846 (TF-TG) ENSMUSG00000038422	false
4534	TF-TG	ENSMUSG00000015846 (TF-TG) ENSMUSG00000038451	false
4535	TF-TG	ENSMUSG00000015846 (TF-TG) ENSMUSG00000038456	false
4536	TF-TG	ENSMUSG00000015846 (TF-TG) ENSMUSG00000038463	false
4537	TF-TG	ENSMUSG00000015846 (TF-TG) ENSMUSG00000038486	false
4538	TF-TG	ENSMUSG00000015846 (TF-TG) ENSMUSG00000038496	false
4539	TF-TG	ENSMUSG00000015846 (TF-TG) ENSMUSG00000038530	false
4540	TF-TG	ENSMUSG00000015846 (TF-TG) ENSMUSG00000038555	false
4541	TF-TG	ENSMUSG00000015846 (TF-TG) ENSMUSG00000038560	false
4542	TF-TG	ENSMUSG00000015846 (TF-TG) ENSMUSG00000038580	false
4543	TF-TG	ENSMUSG00000015846 (TF-TG) ENSMUSG00000038599	false
4544	TF-TG	ENSMUSG00000015846 (TF-TG) ENSMUSG00000038602	false
4545	TF-TG	ENSMUSG00000015846 (TF-TG) ENSMUSG00000038641	false
4546	TF-TG	ENSMUSG00000015846 (TF-TG) ENSMUSG00000038644	false
4547	TF-TG	ENSMUSG00000015846 (TF-TG) ENSMUSG00000038670	false
4548	TF-TG	ENSMUSG00000015846 (TF-TG) ENSMUSG00000038692	false
4549	TF-TG	ENSMUSG00000015846 (TF-TG) ENSMUSG00000038704	false
4550	TF-TG	ENSMUSG00000015846 (TF-TG) ENSMUSG00000038740	false
4551	TF-TG	ENSMUSG00000015846 (TF-TG) ENSMUSG00000038742	false
4552	TF-TG	ENSMUSG00000015846 (TF-TG) ENSMUSG00000038745	false
4553	TF-TG	ENSMUSG00000015846 (TF-TG) ENSMUSG00000038751	false
4554	TF-TG	ENSMUSG00000015846 (TF-TG) ENSMUSG00000038765	false
4555	TF-TG	ENSMUSG00000015846 (TF-TG) ENSMUSG00000038768	false
4556	TF-TG	ENSMUSG00000015846 (TF-TG) ENSMUSG00000038777	false
4557	TF-TG	ENSMUSG00000015846 (TF-TG) ENSMUSG00000038836	false
4558	TF-TG	ENSMUSG00000015846 (TF-TG) ENSMUSG00000038843	false
4559	TF-TG	ENSMUSG00000015846 (TF-TG) ENSMUSG00000038879	false
4560	TF-TG	ENSMUSG00000015846 (TF-TG) ENSMUSG00000038884	false
4561	TF-TG	ENSMUSG00000015846 (TF-TG) ENSMUSG00000038903	false
4562	TF-TG	ENSMUSG00000015846 (TF-TG) ENSMUSG00000038984	false
4563	TF-TG	ENSMUSG00000015846 (TF-TG) ENSMUSG00000039004	false
4564	TF-TG	ENSMUSG00000015846 (TF-TG) ENSMUSG00000039005	false
4565	TF-TG	ENSMUSG00000015846 (TF-TG) ENSMUSG00000039007	false
4566	TF-TG	ENSMUSG00000015846 (TF-TG) ENSMUSG00000039013	false
4567	TF-TG	ENSMUSG00000015846 (TF-TG) ENSMUSG00000039031	false
4568	TF-TG	ENSMUSG00000015846 (TF-TG) ENSMUSG00000039050	false
4569	TF-TG	ENSMUSG00000015846 (TF-TG) ENSMUSG00000039059	false
4570	TF-TG	ENSMUSG00000015846 (TF-TG) ENSMUSG00000039081	false
4571	TF-TG	ENSMUSG00000015846 (TF-TG) ENSMUSG00000039087	false
4572	TF-TG	ENSMUSG00000015846 (TF-TG) ENSMUSG00000039114	false
4573	TF-TG	ENSMUSG00000015846 (TF-TG) ENSMUSG00000039115	false
4574	TF-TG	ENSMUSG00000015846 (TF-TG) ENSMUSG00000039126	false
4575	TF-TG	ENSMUSG00000015846 (TF-TG) ENSMUSG00000039145	false
4576	TF-TG	ENSMUSG00000015846 (TF-TG) ENSMUSG00000039157	false
4577	TF-TG	ENSMUSG00000015846 (TF-TG) ENSMUSG00000039158	false
4578	TF-TG	ENSMUSG00000015846 (TF-TG) ENSMUSG00000039166	false
4579	TF-TG	ENSMUSG00000015846 (TF-TG) ENSMUSG00000039168	false
4580	TF-TG	ENSMUSG00000015846 (TF-TG) ENSMUSG00000039178	false
4581	TF-TG	ENSMUSG00000015846 (TF-TG) ENSMUSG00000039195	false
4582	TF-TG	ENSMUSG00000015846 (TF-TG) ENSMUSG00000039200	false
4583	TF-TG	ENSMUSG00000015846 (TF-TG) ENSMUSG00000039232	false
4584	TF-TG	ENSMUSG00000015846 (TF-TG) ENSMUSG00000039236	false
4585	TF-TG	ENSMUSG00000015846 (TF-TG) ENSMUSG00000039270	false
4586	TF-TG	ENSMUSG00000015846 (TF-TG) ENSMUSG00000039278	false
4587	TF-TG	ENSMUSG00000015846 (TF-TG) ENSMUSG00000039304	false
4588	TF-TG	ENSMUSG00000015846 (TF-TG) ENSMUSG00000039323	false
4589	TF-TG	ENSMUSG00000015846 (TF-TG) ENSMUSG00000039339	false
4590	TF-TG	ENSMUSG00000015846 (TF-TG) ENSMUSG00000039372	false
4591	TF-TG	ENSMUSG00000015846 (TF-TG) ENSMUSG00000039384	false
4592	TF-TG	ENSMUSG00000015846 (TF-TG) ENSMUSG00000039396	false
4593	TF-TG	ENSMUSG00000015846 (TF-TG) ENSMUSG00000039470	false
4594	TF-TG	ENSMUSG00000015846 (TF-TG) ENSMUSG00000039497	false
4595	TF-TG	ENSMUSG00000015846 (TF-TG) ENSMUSG00000039530	false
4596	TF-TG	ENSMUSG00000015846 (TF-TG) ENSMUSG00000039601	false
4597	TF-TG	ENSMUSG00000015846 (TF-TG) ENSMUSG00000039607	false
4598	TF-TG	ENSMUSG00000015846 (TF-TG) ENSMUSG00000039616	false
4599	TF-TG	ENSMUSG00000015846 (TF-TG) ENSMUSG00000039620	false
4600	TF-TG	ENSMUSG00000015846 (TF-TG) ENSMUSG00000039634	false
4601	TF-TG	ENSMUSG00000015846 (TF-TG) ENSMUSG00000039648	false
4602	TF-TG	ENSMUSG00000015846 (TF-TG) ENSMUSG00000039676	false
4603	TF-TG	ENSMUSG00000015846 (TF-TG) ENSMUSG00000039683	false
4604	TF-TG	ENSMUSG00000015846 (TF-TG) ENSMUSG00000039693	false
4605	TF-TG	ENSMUSG00000015846 (TF-TG) ENSMUSG00000039713	false
4606	TF-TG	ENSMUSG00000015846 (TF-TG) ENSMUSG00000039740	false
4607	TF-TG	ENSMUSG00000015846 (TF-TG) ENSMUSG00000039809	false
4608	TF-TG	ENSMUSG00000015846 (TF-TG) ENSMUSG00000039813	false
4609	TF-TG	ENSMUSG00000015846 (TF-TG) ENSMUSG00000039814	false
4610	TF-TG	ENSMUSG00000015846 (TF-TG) ENSMUSG00000039851	false
4611	TF-TG	ENSMUSG00000015846 (TF-TG) ENSMUSG00000039911	false
4612	TF-TG	ENSMUSG00000015846 (TF-TG) ENSMUSG00000039934	false
4613	TF-TG	ENSMUSG00000015846 (TF-TG) ENSMUSG00000039943	false
4614	TF-TG	ENSMUSG00000015846 (TF-TG) ENSMUSG00000039952	false
4615	TF-TG	ENSMUSG00000015846 (TF-TG) ENSMUSG00000039958	false
4616	TF-TG	ENSMUSG00000015846 (TF-TG) ENSMUSG00000039967	false
4617	TF-TG	ENSMUSG00000015846 (TF-TG) ENSMUSG00000039981	false
4618	TF-TG	ENSMUSG00000015846 (TF-TG) ENSMUSG00000040003	false
4619	TF-TG	ENSMUSG00000015846 (TF-TG) ENSMUSG00000040084	false
4620	TF-TG	ENSMUSG00000015846 (TF-TG) ENSMUSG00000040118	false
4621	TF-TG	ENSMUSG00000015846 (TF-TG) ENSMUSG00000040127	false
4622	TF-TG	ENSMUSG00000015846 (TF-TG) ENSMUSG00000040134	false
4623	TF-TG	ENSMUSG00000015846 (TF-TG) ENSMUSG00000040136	false
4624	TF-TG	ENSMUSG00000015846 (TF-TG) ENSMUSG00000040147	false
4625	TF-TG	ENSMUSG00000015846 (TF-TG) ENSMUSG00000040152	false
4626	TF-TG	ENSMUSG00000015846 (TF-TG) ENSMUSG00000040170	false
4627	TF-TG	ENSMUSG00000015846 (TF-TG) ENSMUSG00000040181	false
4628	TF-TG	ENSMUSG00000015846 (TF-TG) ENSMUSG00000040209	false
4629	TF-TG	ENSMUSG00000015846 (TF-TG) ENSMUSG00000040249	false
4630	TF-TG	ENSMUSG00000015846 (TF-TG) ENSMUSG00000040258	false
4631	TF-TG	ENSMUSG00000015846 (TF-TG) ENSMUSG00000040276	false
4632	TF-TG	ENSMUSG00000015846 (TF-TG) ENSMUSG00000040280	false
4633	TF-TG	ENSMUSG00000015846 (TF-TG) ENSMUSG00000040296	false
4634	TF-TG	ENSMUSG00000015846 (TF-TG) ENSMUSG00000040345	false
4635	TF-TG	ENSMUSG00000015846 (TF-TG) ENSMUSG00000040387	false
4636	TF-TG	ENSMUSG00000015846 (TF-TG) ENSMUSG00000040389	false
4637	TF-TG	ENSMUSG00000015846 (TF-TG) ENSMUSG00000040430	false
4638	TF-TG	ENSMUSG00000015846 (TF-TG) ENSMUSG00000040433	false
4639	TF-TG	ENSMUSG00000015846 (TF-TG) ENSMUSG00000040447	false
4640	TF-TG	ENSMUSG00000015846 (TF-TG) ENSMUSG00000040462	false
4641	TF-TG	ENSMUSG00000015846 (TF-TG) ENSMUSG00000040495	false
4642	TF-TG	ENSMUSG00000015846 (TF-TG) ENSMUSG00000040562	false
4643	TF-TG	ENSMUSG00000015846 (TF-TG) ENSMUSG00000040563	false
4644	TF-TG	ENSMUSG00000015846 (TF-TG) ENSMUSG00000040584	false
4645	TF-TG	ENSMUSG00000015846 (TF-TG) ENSMUSG00000040592	false
4646	TF-TG	ENSMUSG00000015846 (TF-TG) ENSMUSG00000040605	false
4647	TF-TG	ENSMUSG00000015846 (TF-TG) ENSMUSG00000040624	false
4648	TF-TG	ENSMUSG00000015846 (TF-TG) ENSMUSG00000040631	false
4649	TF-TG	ENSMUSG00000015846 (TF-TG) ENSMUSG00000040640	false
4650	TF-TG	ENSMUSG00000015846 (TF-TG) ENSMUSG00000040663	false
4651	TF-TG	ENSMUSG00000015846 (TF-TG) ENSMUSG00000040706	false
4652	TF-TG	ENSMUSG00000015846 (TF-TG) ENSMUSG00000040723	false
4653	TF-TG	ENSMUSG00000015846 (TF-TG) ENSMUSG00000040747	false
4654	TF-TG	ENSMUSG00000015846 (TF-TG) ENSMUSG00000040852	false
4655	TF-TG	ENSMUSG00000015846 (TF-TG) ENSMUSG00000040875	false
4656	TF-TG	ENSMUSG00000015846 (TF-TG) ENSMUSG00000040891	false
4657	TF-TG	ENSMUSG00000015846 (TF-TG) ENSMUSG00000040918	false
4658	TF-TG	ENSMUSG00000015846 (TF-TG) ENSMUSG00000040972	false
4659	TF-TG	ENSMUSG00000015846 (TF-TG) ENSMUSG00000040990	false
4660	TF-TG	ENSMUSG00000015846 (TF-TG) ENSMUSG00000040998	false
4661	TF-TG	ENSMUSG00000015846 (TF-TG) ENSMUSG00000041000	false
4662	TF-TG	ENSMUSG00000015846 (TF-TG) ENSMUSG00000041025	false
4663	TF-TG	ENSMUSG00000015846 (TF-TG) ENSMUSG00000041040	false
4664	TF-TG	ENSMUSG00000015846 (TF-TG) ENSMUSG00000041058	false
4665	TF-TG	ENSMUSG00000015846 (TF-TG) ENSMUSG00000041062	false
4666	TF-TG	ENSMUSG00000015846 (TF-TG) ENSMUSG00000041064	false
4667	TF-TG	ENSMUSG00000015846 (TF-TG) ENSMUSG00000041075	false
4668	TF-TG	ENSMUSG00000015846 (TF-TG) ENSMUSG00000041096	false
4669	TF-TG	ENSMUSG00000015846 (TF-TG) ENSMUSG00000041120	false
4670	TF-TG	ENSMUSG00000015846 (TF-TG) ENSMUSG00000041126	false
4671	TF-TG	ENSMUSG00000015846 (TF-TG) ENSMUSG00000041141	false
4672	TF-TG	ENSMUSG00000015846 (TF-TG) ENSMUSG00000041143	false
4673	TF-TG	ENSMUSG00000015846 (TF-TG) ENSMUSG00000041168	false
4674	TF-TG	ENSMUSG00000015846 (TF-TG) ENSMUSG00000041193	false
4675	TF-TG	ENSMUSG00000015846 (TF-TG) ENSMUSG00000041202	false
4676	TF-TG	ENSMUSG00000015846 (TF-TG) ENSMUSG00000041219	false
4677	TF-TG	ENSMUSG00000015846 (TF-TG) ENSMUSG00000041237	false
4678	TF-TG	ENSMUSG00000015846 (TF-TG) ENSMUSG00000041268	false
4679	TF-TG	ENSMUSG00000015846 (TF-TG) ENSMUSG00000041351	false
4680	TF-TG	ENSMUSG00000015846 (TF-TG) ENSMUSG00000041420	false
4681	TF-TG	ENSMUSG00000015846 (TF-TG) ENSMUSG00000041431	false
4682	TF-TG	ENSMUSG00000015846 (TF-TG) ENSMUSG00000041444	false
4683	TF-TG	ENSMUSG00000015846 (TF-TG) ENSMUSG00000041476	false
4684	TF-TG	ENSMUSG00000015846 (TF-TG) ENSMUSG00000041548	false
4685	TF-TG	ENSMUSG00000015846 (TF-TG) ENSMUSG00000041570	false
4686	TF-TG	ENSMUSG00000015846 (TF-TG) ENSMUSG00000041608	false
4687	TF-TG	ENSMUSG00000015846 (TF-TG) ENSMUSG00000041609	false
4688	TF-TG	ENSMUSG00000015846 (TF-TG) ENSMUSG00000041617	false
4689	TF-TG	ENSMUSG00000015846 (TF-TG) ENSMUSG00000041632	false
4690	TF-TG	ENSMUSG00000015846 (TF-TG) ENSMUSG00000041658	false
4691	TF-TG	ENSMUSG00000015846 (TF-TG) ENSMUSG00000041696	false
4692	TF-TG	ENSMUSG00000015846 (TF-TG) ENSMUSG00000041729	false
4693	TF-TG	ENSMUSG00000015846 (TF-TG) ENSMUSG00000041733	false
4694	TF-TG	ENSMUSG00000015846 (TF-TG) ENSMUSG00000041794	false
4695	TF-TG	ENSMUSG00000015846 (TF-TG) ENSMUSG00000041798	false
4696	TF-TG	ENSMUSG00000015846 (TF-TG) ENSMUSG00000041831	false
4697	TF-TG	ENSMUSG00000015846 (TF-TG) ENSMUSG00000041836	false
4698	TF-TG	ENSMUSG00000015846 (TF-TG) ENSMUSG00000041886	false
4699	TF-TG	ENSMUSG00000015846 (TF-TG) ENSMUSG00000041889	false
4700	TF-TG	ENSMUSG00000015846 (TF-TG) ENSMUSG00000041930	false
4701	TF-TG	ENSMUSG00000015846 (TF-TG) ENSMUSG00000041945	false
4702	TF-TG	ENSMUSG00000015846 (TF-TG) ENSMUSG00000041974	false
4703	TF-TG	ENSMUSG00000015846 (TF-TG) ENSMUSG00000042010	false
4704	TF-TG	ENSMUSG00000015846 (TF-TG) ENSMUSG00000042035	false
4705	TF-TG	ENSMUSG00000015846 (TF-TG) ENSMUSG00000042041	false
4706	TF-TG	ENSMUSG00000015846 (TF-TG) ENSMUSG00000042042	false
4707	TF-TG	ENSMUSG00000015846 (TF-TG) ENSMUSG00000042096	false
4708	TF-TG	ENSMUSG00000015846 (TF-TG) ENSMUSG00000042099	false
4709	TF-TG	ENSMUSG00000015846 (TF-TG) ENSMUSG00000042109	false
4710	TF-TG	ENSMUSG00000015846 (TF-TG) ENSMUSG00000042115	false
4711	TF-TG	ENSMUSG00000015846 (TF-TG) ENSMUSG00000042155	false
4712	TF-TG	ENSMUSG00000015846 (TF-TG) ENSMUSG00000042179	false
4713	TF-TG	ENSMUSG00000015846 (TF-TG) ENSMUSG00000042195	false
4714	TF-TG	ENSMUSG00000015846 (TF-TG) ENSMUSG00000042251	false
4715	TF-TG	ENSMUSG00000015846 (TF-TG) ENSMUSG00000042258	false
4716	TF-TG	ENSMUSG00000015846 (TF-TG) ENSMUSG00000042271	false
4717	TF-TG	ENSMUSG00000015846 (TF-TG) ENSMUSG00000042303	false
4718	TF-TG	ENSMUSG00000015846 (TF-TG) ENSMUSG00000042306	false
4719	TF-TG	ENSMUSG00000015846 (TF-TG) ENSMUSG00000042333	false
4720	TF-TG	ENSMUSG00000015846 (TF-TG) ENSMUSG00000042359	false
4721	TF-TG	ENSMUSG00000015846 (TF-TG) ENSMUSG00000042371	false
4722	TF-TG	ENSMUSG00000015846 (TF-TG) ENSMUSG00000042429	false
4723	TF-TG	ENSMUSG00000015846 (TF-TG) ENSMUSG00000042498	false
4724	TF-TG	ENSMUSG00000015846 (TF-TG) ENSMUSG00000042500	false
4725	TF-TG	ENSMUSG00000015846 (TF-TG) ENSMUSG00000042501	false
4726	TF-TG	ENSMUSG00000015846 (TF-TG) ENSMUSG00000042515	false
4727	TF-TG	ENSMUSG00000015846 (TF-TG) ENSMUSG00000042523	false
4728	TF-TG	ENSMUSG00000015846 (TF-TG) ENSMUSG00000042564	false
4729	TF-TG	ENSMUSG00000015846 (TF-TG) ENSMUSG00000042581	false
4730	TF-TG	ENSMUSG00000015846 (TF-TG) ENSMUSG00000042607	false
4731	TF-TG	ENSMUSG00000015846 (TF-TG) ENSMUSG00000042631	false
4732	TF-TG	ENSMUSG00000015846 (TF-TG) ENSMUSG00000042647	false
4733	TF-TG	ENSMUSG00000015846 (TF-TG) ENSMUSG00000042686	false
4734	TF-TG	ENSMUSG00000015846 (TF-TG) ENSMUSG00000042712	false
4735	TF-TG	ENSMUSG00000015846 (TF-TG) ENSMUSG00000042734	false
4736	TF-TG	ENSMUSG00000015846 (TF-TG) ENSMUSG00000042750	false
4737	TF-TG	ENSMUSG00000015846 (TF-TG) ENSMUSG00000042751	false
4738	TF-TG	ENSMUSG00000015846 (TF-TG) ENSMUSG00000042763	false
4739	TF-TG	ENSMUSG00000015846 (TF-TG) ENSMUSG00000042797	false
4740	TF-TG	ENSMUSG00000015846 (TF-TG) ENSMUSG00000042816	false
4741	TF-TG	ENSMUSG00000015846 (TF-TG) ENSMUSG00000042842	false
4742	TF-TG	ENSMUSG00000015846 (TF-TG) ENSMUSG00000042873	false
4743	TF-TG	ENSMUSG00000015846 (TF-TG) ENSMUSG00000042942	false
4744	TF-TG	ENSMUSG00000015846 (TF-TG) ENSMUSG00000042985	false
4745	TF-TG	ENSMUSG00000015846 (TF-TG) ENSMUSG00000043004	false
4746	TF-TG	ENSMUSG00000015846 (TF-TG) ENSMUSG00000043029	false
4747	TF-TG	ENSMUSG00000015846 (TF-TG) ENSMUSG00000043068	false
4748	TF-TG	ENSMUSG00000015846 (TF-TG) ENSMUSG00000043154	false
4749	TF-TG	ENSMUSG00000015846 (TF-TG) ENSMUSG00000043262	false
4750	TF-TG	ENSMUSG00000015846 (TF-TG) ENSMUSG00000043388	false
4751	TF-TG	ENSMUSG00000015846 (TF-TG) ENSMUSG00000043391	false
4752	TF-TG	ENSMUSG00000015846 (TF-TG) ENSMUSG00000043419	false
4753	TF-TG	ENSMUSG00000015846 (TF-TG) ENSMUSG00000043461	false
4754	TF-TG	ENSMUSG00000015846 (TF-TG) ENSMUSG00000043518	false
4755	TF-TG	ENSMUSG00000015846 (TF-TG) ENSMUSG00000043542	false
4756	TF-TG	ENSMUSG00000015846 (TF-TG) ENSMUSG00000043592	false
4757	TF-TG	ENSMUSG00000015846 (TF-TG) ENSMUSG00000043639	false
4758	TF-TG	ENSMUSG00000015846 (TF-TG) ENSMUSG00000043673	false
4759	TF-TG	ENSMUSG00000015846 (TF-TG) ENSMUSG00000043789	false
4760	TF-TG	ENSMUSG00000015846 (TF-TG) ENSMUSG00000043885	false
4761	TF-TG	ENSMUSG00000015846 (TF-TG) ENSMUSG00000043953	false
4762	TF-TG	ENSMUSG00000015846 (TF-TG) ENSMUSG00000044017	false
4763	TF-TG	ENSMUSG00000015846 (TF-TG) ENSMUSG00000044026	false
4764	TF-TG	ENSMUSG00000015846 (TF-TG) ENSMUSG00000044033	false
4765	TF-TG	ENSMUSG00000015846 (TF-TG) ENSMUSG00000044072	false
4766	TF-TG	ENSMUSG00000015846 (TF-TG) ENSMUSG00000044150	false
4767	TF-TG	ENSMUSG00000015846 (TF-TG) ENSMUSG00000044162	false
4768	TF-TG	ENSMUSG00000015846 (TF-TG) ENSMUSG00000044201	false
4769	TF-TG	ENSMUSG00000015846 (TF-TG) ENSMUSG00000044254	false
4770	TF-TG	ENSMUSG00000015846 (TF-TG) ENSMUSG00000044288	false
4771	TF-TG	ENSMUSG00000015846 (TF-TG) ENSMUSG00000044313	false
4772	TF-TG	ENSMUSG00000015846 (TF-TG) ENSMUSG00000044317	false
4773	TF-TG	ENSMUSG00000015846 (TF-TG) ENSMUSG00000044340	false
4774	TF-TG	ENSMUSG00000015846 (TF-TG) ENSMUSG00000044348	false
4775	TF-TG	ENSMUSG00000015846 (TF-TG) ENSMUSG00000044364	false
4776	TF-TG	ENSMUSG00000015846 (TF-TG) ENSMUSG00000044367	false
4777	TF-TG	ENSMUSG00000015846 (TF-TG) ENSMUSG00000044456	false
4778	TF-TG	ENSMUSG00000015846 (TF-TG) ENSMUSG00000044461	false
4779	TF-TG	ENSMUSG00000015846 (TF-TG) ENSMUSG00000044468	false
4780	TF-TG	ENSMUSG00000015846 (TF-TG) ENSMUSG00000044548	false
4781	TF-TG	ENSMUSG00000015846 (TF-TG) ENSMUSG00000044646	false
4782	TF-TG	ENSMUSG00000015846 (TF-TG) ENSMUSG00000044674	false
4783	TF-TG	ENSMUSG00000015846 (TF-TG) ENSMUSG00000044707	false
4784	TF-TG	ENSMUSG00000015846 (TF-TG) ENSMUSG00000044748	false
4785	TF-TG	ENSMUSG00000015846 (TF-TG) ENSMUSG00000044807	false
4786	TF-TG	ENSMUSG00000015846 (TF-TG) ENSMUSG00000044912	false
4787	TF-TG	ENSMUSG00000015846 (TF-TG) ENSMUSG00000044921	false
4788	TF-TG	ENSMUSG00000015846 (TF-TG) ENSMUSG00000044933	false
4789	TF-TG	ENSMUSG00000015846 (TF-TG) ENSMUSG00000045007	false
4790	TF-TG	ENSMUSG00000015846 (TF-TG) ENSMUSG00000045019	false
4791	TF-TG	ENSMUSG00000015846 (TF-TG) ENSMUSG00000045027	false
4792	TF-TG	ENSMUSG00000015846 (TF-TG) ENSMUSG00000045094	false
4793	TF-TG	ENSMUSG00000015846 (TF-TG) ENSMUSG00000045165	false
4794	TF-TG	ENSMUSG00000015846 (TF-TG) ENSMUSG00000045215	false
4795	TF-TG	ENSMUSG00000015846 (TF-TG) ENSMUSG00000045281	false
4796	TF-TG	ENSMUSG00000015846 (TF-TG) ENSMUSG00000045294	false
4797	TF-TG	ENSMUSG00000015846 (TF-TG) ENSMUSG00000045312	false
4798	TF-TG	ENSMUSG00000015846 (TF-TG) ENSMUSG00000045349	false
4799	TF-TG	ENSMUSG00000015846 (TF-TG) ENSMUSG00000045374	false
4800	TF-TG	ENSMUSG00000015846 (TF-TG) ENSMUSG00000045382	false
4801	TF-TG	ENSMUSG00000015846 (TF-TG) ENSMUSG00000045441	false
4802	TF-TG	ENSMUSG00000015846 (TF-TG) ENSMUSG00000045518	false
4803	TF-TG	ENSMUSG00000015846 (TF-TG) ENSMUSG00000045629	false
4804	TF-TG	ENSMUSG00000015846 (TF-TG) ENSMUSG00000045667	false
4805	TF-TG	ENSMUSG00000015846 (TF-TG) ENSMUSG00000045679	false
4806	TF-TG	ENSMUSG00000015846 (TF-TG) ENSMUSG00000045790	false
4807	TF-TG	ENSMUSG00000015846 (TF-TG) ENSMUSG00000045838	false
4808	TF-TG	ENSMUSG00000015846 (TF-TG) ENSMUSG00000045871	false
4809	TF-TG	ENSMUSG00000015846 (TF-TG) ENSMUSG00000045896	false
4810	TF-TG	ENSMUSG00000015846 (TF-TG) ENSMUSG00000045912	false
4811	TF-TG	ENSMUSG00000015846 (TF-TG) ENSMUSG00000046058	false
4812	TF-TG	ENSMUSG00000015846 (TF-TG) ENSMUSG00000046070	false
4813	TF-TG	ENSMUSG00000015846 (TF-TG) ENSMUSG00000046093	false
4814	TF-TG	ENSMUSG00000015846 (TF-TG) ENSMUSG00000046157	false
4815	TF-TG	ENSMUSG00000015846 (TF-TG) ENSMUSG00000046160	false
4816	TF-TG	ENSMUSG00000015846 (TF-TG) ENSMUSG00000046178	false
4817	TF-TG	ENSMUSG00000015846 (TF-TG) ENSMUSG00000046215	false
4818	TF-TG	ENSMUSG00000015846 (TF-TG) ENSMUSG00000046223	false
4819	TF-TG	ENSMUSG00000015846 (TF-TG) ENSMUSG00000046242	false
4820	TF-TG	ENSMUSG00000015846 (TF-TG) ENSMUSG00000046295	false
4821	TF-TG	ENSMUSG00000015846 (TF-TG) ENSMUSG00000046402	false
4822	TF-TG	ENSMUSG00000015846 (TF-TG) ENSMUSG00000046410	false
4823	TF-TG	ENSMUSG00000015846 (TF-TG) ENSMUSG00000046442	false
4824	TF-TG	ENSMUSG00000015846 (TF-TG) ENSMUSG00000046447	false
4825	TF-TG	ENSMUSG00000015846 (TF-TG) ENSMUSG00000046546	false
4826	TF-TG	ENSMUSG00000015846 (TF-TG) ENSMUSG00000046550	false
4827	TF-TG	ENSMUSG00000015846 (TF-TG) ENSMUSG00000046589	false
4828	TF-TG	ENSMUSG00000015846 (TF-TG) ENSMUSG00000046591	false
4829	TF-TG	ENSMUSG00000015846 (TF-TG) ENSMUSG00000046598	false
4830	TF-TG	ENSMUSG00000015846 (TF-TG) ENSMUSG00000046613	false
4831	TF-TG	ENSMUSG00000015846 (TF-TG) ENSMUSG00000046623	false
4832	TF-TG	ENSMUSG00000015846 (TF-TG) ENSMUSG00000046668	false
4833	TF-TG	ENSMUSG00000015846 (TF-TG) ENSMUSG00000046688	false
4834	TF-TG	ENSMUSG00000015846 (TF-TG) ENSMUSG00000046697	false
4835	TF-TG	ENSMUSG00000015846 (TF-TG) ENSMUSG00000046711	false
4836	TF-TG	ENSMUSG00000015846 (TF-TG) ENSMUSG00000046814	false
4837	TF-TG	ENSMUSG00000015846 (TF-TG) ENSMUSG00000046826	false
4838	TF-TG	ENSMUSG00000015846 (TF-TG) ENSMUSG00000046841	false
4839	TF-TG	ENSMUSG00000015846 (TF-TG) ENSMUSG00000046994	false
4840	TF-TG	ENSMUSG00000015846 (TF-TG) ENSMUSG00000047139	false
4841	TF-TG	ENSMUSG00000015846 (TF-TG) ENSMUSG00000047181	false
4842	TF-TG	ENSMUSG00000015846 (TF-TG) ENSMUSG00000047205	false
4843	TF-TG	ENSMUSG00000015846 (TF-TG) ENSMUSG00000047230	false
4844	TF-TG	ENSMUSG00000015846 (TF-TG) ENSMUSG00000047242	false
4845	TF-TG	ENSMUSG00000015846 (TF-TG) ENSMUSG00000047415	false
4846	TF-TG	ENSMUSG00000015846 (TF-TG) ENSMUSG00000047473	false
4847	TF-TG	ENSMUSG00000015846 (TF-TG) ENSMUSG00000047501	false
4848	TF-TG	ENSMUSG00000015846 (TF-TG) ENSMUSG00000047507	false
4849	TF-TG	ENSMUSG00000015846 (TF-TG) ENSMUSG00000047528	false
4850	TF-TG	ENSMUSG00000015846 (TF-TG) ENSMUSG00000047534	false
4851	TF-TG	ENSMUSG00000015846 (TF-TG) ENSMUSG00000047604	false
4852	TF-TG	ENSMUSG00000015846 (TF-TG) ENSMUSG00000047641	false
4853	TF-TG	ENSMUSG00000015846 (TF-TG) ENSMUSG00000047642	false
4854	TF-TG	ENSMUSG00000015846 (TF-TG) ENSMUSG00000047702	false
4855	TF-TG	ENSMUSG00000015846 (TF-TG) ENSMUSG00000047728	false
4856	TF-TG	ENSMUSG00000015846 (TF-TG) ENSMUSG00000047730	false
4857	TF-TG	ENSMUSG00000015846 (TF-TG) ENSMUSG00000047735	false
4858	TF-TG	ENSMUSG00000015846 (TF-TG) ENSMUSG00000047747	false
4859	TF-TG	ENSMUSG00000015846 (TF-TG) ENSMUSG00000047767	false
4860	TF-TG	ENSMUSG00000015846 (TF-TG) ENSMUSG00000047797	false
4861	TF-TG	ENSMUSG00000015846 (TF-TG) ENSMUSG00000047810	false
4862	TF-TG	ENSMUSG00000015846 (TF-TG) ENSMUSG00000047842	false
4863	TF-TG	ENSMUSG00000015846 (TF-TG) ENSMUSG00000047844	false
4864	TF-TG	ENSMUSG00000015846 (TF-TG) ENSMUSG00000047867	false
4865	TF-TG	ENSMUSG00000015846 (TF-TG) ENSMUSG00000047875	false
4866	TF-TG	ENSMUSG00000015846 (TF-TG) ENSMUSG00000047907	false
4867	TF-TG	ENSMUSG00000015846 (TF-TG) ENSMUSG00000047945	false
4868	TF-TG	ENSMUSG00000015846 (TF-TG) ENSMUSG00000047963	false
4869	TF-TG	ENSMUSG00000015846 (TF-TG) ENSMUSG00000047976	false
4870	TF-TG	ENSMUSG00000015846 (TF-TG) ENSMUSG00000047986	false
4871	TF-TG	ENSMUSG00000015846 (TF-TG) ENSMUSG00000048022	false
4872	TF-TG	ENSMUSG00000015846 (TF-TG) ENSMUSG00000048058	false
4873	TF-TG	ENSMUSG00000015846 (TF-TG) ENSMUSG00000048065	false
4874	TF-TG	ENSMUSG00000015846 (TF-TG) ENSMUSG00000048078	false
4875	TF-TG	ENSMUSG00000015846 (TF-TG) ENSMUSG00000048148	false
4876	TF-TG	ENSMUSG00000015846 (TF-TG) ENSMUSG00000048216	false
4877	TF-TG	ENSMUSG00000015846 (TF-TG) ENSMUSG00000048217	false
4878	TF-TG	ENSMUSG00000015846 (TF-TG) ENSMUSG00000048232	false
4879	TF-TG	ENSMUSG00000015846 (TF-TG) ENSMUSG00000048279	false
4880	TF-TG	ENSMUSG00000015846 (TF-TG) ENSMUSG00000048330	false
4881	TF-TG	ENSMUSG00000015846 (TF-TG) ENSMUSG00000048349	false
4882	TF-TG	ENSMUSG00000015846 (TF-TG) ENSMUSG00000048373	false
4883	TF-TG	ENSMUSG00000015846 (TF-TG) ENSMUSG00000048376	false
4884	TF-TG	ENSMUSG00000015846 (TF-TG) ENSMUSG00000048424	false
4885	TF-TG	ENSMUSG00000015846 (TF-TG) ENSMUSG00000048440	false
4886	TF-TG	ENSMUSG00000015846 (TF-TG) ENSMUSG00000048450	false
4887	TF-TG	ENSMUSG00000015846 (TF-TG) ENSMUSG00000048458	false
4888	TF-TG	ENSMUSG00000015846 (TF-TG) ENSMUSG00000048473	false
4889	TF-TG	ENSMUSG00000015846 (TF-TG) ENSMUSG00000048485	false
4890	TF-TG	ENSMUSG00000015846 (TF-TG) ENSMUSG00000048534	false
4891	TF-TG	ENSMUSG00000015846 (TF-TG) ENSMUSG00000048572	false
4892	TF-TG	ENSMUSG00000015846 (TF-TG) ENSMUSG00000048581	false
4893	TF-TG	ENSMUSG00000015846 (TF-TG) ENSMUSG00000048612	false
4894	TF-TG	ENSMUSG00000015846 (TF-TG) ENSMUSG00000048620	false
4895	TF-TG	ENSMUSG00000015846 (TF-TG) ENSMUSG00000048644	false
4896	TF-TG	ENSMUSG00000015846 (TF-TG) ENSMUSG00000048763	false
4897	TF-TG	ENSMUSG00000015846 (TF-TG) ENSMUSG00000048895	false
4898	TF-TG	ENSMUSG00000015846 (TF-TG) ENSMUSG00000048905	false
4899	TF-TG	ENSMUSG00000015846 (TF-TG) ENSMUSG00000048911	false
4900	TF-TG	ENSMUSG00000015846 (TF-TG) ENSMUSG00000048965	false
4901	TF-TG	ENSMUSG00000015846 (TF-TG) ENSMUSG00000048970	false
4902	TF-TG	ENSMUSG00000015846 (TF-TG) ENSMUSG00000048988	false
4903	TF-TG	ENSMUSG00000015846 (TF-TG) ENSMUSG00000048997	false
4904	TF-TG	ENSMUSG00000015846 (TF-TG) ENSMUSG00000049038	false
4905	TF-TG	ENSMUSG00000015846 (TF-TG) ENSMUSG00000049044	false
4906	TF-TG	ENSMUSG00000015846 (TF-TG) ENSMUSG00000049047	false
4907	TF-TG	ENSMUSG00000015846 (TF-TG) ENSMUSG00000049148	false
4908	TF-TG	ENSMUSG00000015846 (TF-TG) ENSMUSG00000049154	false
4909	TF-TG	ENSMUSG00000015846 (TF-TG) ENSMUSG00000049184	false
4910	TF-TG	ENSMUSG00000015846 (TF-TG) ENSMUSG00000049288	false
4911	TF-TG	ENSMUSG00000015846 (TF-TG) ENSMUSG00000049313	false
4912	TF-TG	ENSMUSG00000015846 (TF-TG) ENSMUSG00000049436	false
4913	TF-TG	ENSMUSG00000015846 (TF-TG) ENSMUSG00000049493	false
4914	TF-TG	ENSMUSG00000015846 (TF-TG) ENSMUSG00000049532	false
4915	TF-TG	ENSMUSG00000015846 (TF-TG) ENSMUSG00000049551	false
4916	TF-TG	ENSMUSG00000015846 (TF-TG) ENSMUSG00000049580	false
4917	TF-TG	ENSMUSG00000015846 (TF-TG) ENSMUSG00000049588	false
4918	TF-TG	ENSMUSG00000015846 (TF-TG) ENSMUSG00000049670	false
4919	TF-TG	ENSMUSG00000015846 (TF-TG) ENSMUSG00000049690	false
4920	TF-TG	ENSMUSG00000015846 (TF-TG) ENSMUSG00000049723	false
4921	TF-TG	ENSMUSG00000015846 (TF-TG) ENSMUSG00000049807	false
4922	TF-TG	ENSMUSG00000015846 (TF-TG) ENSMUSG00000049858	false
4923	TF-TG	ENSMUSG00000015846 (TF-TG) ENSMUSG00000049866	false
4924	TF-TG	ENSMUSG00000015846 (TF-TG) ENSMUSG00000049871	false
4925	TF-TG	ENSMUSG00000015846 (TF-TG) ENSMUSG00000049878	false
4926	TF-TG	ENSMUSG00000015846 (TF-TG) ENSMUSG00000049892	false
4927	TF-TG	ENSMUSG00000015846 (TF-TG) ENSMUSG00000050052	false
4928	TF-TG	ENSMUSG00000015846 (TF-TG) ENSMUSG00000050064	false
4929	TF-TG	ENSMUSG00000015846 (TF-TG) ENSMUSG00000050103	false
4930	TF-TG	ENSMUSG00000015846 (TF-TG) ENSMUSG00000050148	false
4931	TF-TG	ENSMUSG00000015846 (TF-TG) ENSMUSG00000050234	false
4932	TF-TG	ENSMUSG00000015846 (TF-TG) ENSMUSG00000050240	false
4933	TF-TG	ENSMUSG00000015846 (TF-TG) ENSMUSG00000050270	false
4934	TF-TG	ENSMUSG00000015846 (TF-TG) ENSMUSG00000050296	false
4935	TF-TG	ENSMUSG00000015846 (TF-TG) ENSMUSG00000050323	false
4936	TF-TG	ENSMUSG00000015846 (TF-TG) ENSMUSG00000050335	false
4937	TF-TG	ENSMUSG00000015846 (TF-TG) ENSMUSG00000050357	false
4938	TF-TG	ENSMUSG00000015846 (TF-TG) ENSMUSG00000050379	false
4939	TF-TG	ENSMUSG00000015846 (TF-TG) ENSMUSG00000050395	false
4940	TF-TG	ENSMUSG00000015846 (TF-TG) ENSMUSG00000050592	false
4941	TF-TG	ENSMUSG00000015846 (TF-TG) ENSMUSG00000050640	false
4942	TF-TG	ENSMUSG00000015846 (TF-TG) ENSMUSG00000050711	false
4943	TF-TG	ENSMUSG00000015846 (TF-TG) ENSMUSG00000050721	false
4944	TF-TG	ENSMUSG00000015846 (TF-TG) ENSMUSG00000050737	false
4945	TF-TG	ENSMUSG00000015846 (TF-TG) ENSMUSG00000050751	false
4946	TF-TG	ENSMUSG00000015846 (TF-TG) ENSMUSG00000050777	false
4947	TF-TG	ENSMUSG00000015846 (TF-TG) ENSMUSG00000050822	false
4948	TF-TG	ENSMUSG00000015846 (TF-TG) ENSMUSG00000050824	false
4949	TF-TG	ENSMUSG00000015846 (TF-TG) ENSMUSG00000050953	false
4950	TF-TG	ENSMUSG00000015846 (TF-TG) ENSMUSG00000051067	false
4951	TF-TG	ENSMUSG00000015846 (TF-TG) ENSMUSG00000051076	false
4952	TF-TG	ENSMUSG00000015846 (TF-TG) ENSMUSG00000051079	false
4953	TF-TG	ENSMUSG00000015846 (TF-TG) ENSMUSG00000051166	false
4954	TF-TG	ENSMUSG00000015846 (TF-TG) ENSMUSG00000051177	false
4955	TF-TG	ENSMUSG00000015846 (TF-TG) ENSMUSG00000051185	false
4956	TF-TG	ENSMUSG00000015846 (TF-TG) ENSMUSG00000051209	false
4957	TF-TG	ENSMUSG00000015846 (TF-TG) ENSMUSG00000051314	false
4958	TF-TG	ENSMUSG00000015846 (TF-TG) ENSMUSG00000051335	false
4959	TF-TG	ENSMUSG00000015846 (TF-TG) ENSMUSG00000051343	false
4960	TF-TG	ENSMUSG00000015846 (TF-TG) ENSMUSG00000051344	false
4961	TF-TG	ENSMUSG00000015846 (TF-TG) ENSMUSG00000051359	false
4962	TF-TG	ENSMUSG00000015846 (TF-TG) ENSMUSG00000051483	false
4963	TF-TG	ENSMUSG00000015846 (TF-TG) ENSMUSG00000051497	false
4964	TF-TG	ENSMUSG00000015846 (TF-TG) ENSMUSG00000051498	false
4965	TF-TG	ENSMUSG00000015846 (TF-TG) ENSMUSG00000051517	false
4966	TF-TG	ENSMUSG00000015846 (TF-TG) ENSMUSG00000051579	false
4967	TF-TG	ENSMUSG00000015846 (TF-TG) ENSMUSG00000051652	false
4968	TF-TG	ENSMUSG00000015846 (TF-TG) ENSMUSG00000051669	false
4969	TF-TG	ENSMUSG00000015846 (TF-TG) ENSMUSG00000051726	false
4970	TF-TG	ENSMUSG00000015846 (TF-TG) ENSMUSG00000051727	false
4971	TF-TG	ENSMUSG00000015846 (TF-TG) ENSMUSG00000051977	false
4972	TF-TG	ENSMUSG00000015846 (TF-TG) ENSMUSG00000051980	false
4973	TF-TG	ENSMUSG00000015846 (TF-TG) ENSMUSG00000052062	false
4974	TF-TG	ENSMUSG00000015846 (TF-TG) ENSMUSG00000052087	false
4975	TF-TG	ENSMUSG00000015846 (TF-TG) ENSMUSG00000052105	false
4976	TF-TG	ENSMUSG00000015846 (TF-TG) ENSMUSG00000052131	false
4977	TF-TG	ENSMUSG00000015846 (TF-TG) ENSMUSG00000052135	false
4978	TF-TG	ENSMUSG00000015846 (TF-TG) ENSMUSG00000052212	false
4979	TF-TG	ENSMUSG00000015846 (TF-TG) ENSMUSG00000052353	false
4980	TF-TG	ENSMUSG00000015846 (TF-TG) ENSMUSG00000052364	false
4981	TF-TG	ENSMUSG00000015846 (TF-TG) ENSMUSG00000052384	false
4982	TF-TG	ENSMUSG00000015846 (TF-TG) ENSMUSG00000052392	false
4983	TF-TG	ENSMUSG00000015846 (TF-TG) ENSMUSG00000052396	false
4984	TF-TG	ENSMUSG00000015846 (TF-TG) ENSMUSG00000052560	false
4985	TF-TG	ENSMUSG00000015846 (TF-TG) ENSMUSG00000052584	false
4986	TF-TG	ENSMUSG00000015846 (TF-TG) ENSMUSG00000052595	false
4987	TF-TG	ENSMUSG00000015846 (TF-TG) ENSMUSG00000052609	false
4988	TF-TG	ENSMUSG00000015846 (TF-TG) ENSMUSG00000052676	false
4989	TF-TG	ENSMUSG00000015846 (TF-TG) ENSMUSG00000052852	false
4990	TF-TG	ENSMUSG00000015846 (TF-TG) ENSMUSG00000052914	false
4991	TF-TG	ENSMUSG00000015846 (TF-TG) ENSMUSG00000052921	false
4992	TF-TG	ENSMUSG00000015846 (TF-TG) ENSMUSG00000053007	false
4993	TF-TG	ENSMUSG00000015846 (TF-TG) ENSMUSG00000053046	false
4994	TF-TG	ENSMUSG00000015846 (TF-TG) ENSMUSG00000053054	false
4995	TF-TG	ENSMUSG00000015846 (TF-TG) ENSMUSG00000053080	false
4996	TF-TG	ENSMUSG00000015846 (TF-TG) ENSMUSG00000053137	false
4997	TF-TG	ENSMUSG00000015846 (TF-TG) ENSMUSG00000053182	false
4998	TF-TG	ENSMUSG00000015846 (TF-TG) ENSMUSG00000053199	false
4999	TF-TG	ENSMUSG00000015846 (TF-TG) ENSMUSG00000053216	false
5000	TF-TG	ENSMUSG00000015846 (TF-TG) ENSMUSG00000053219	false
5001	TF-TG	ENSMUSG00000015846 (TF-TG) ENSMUSG00000053279	false
5002	TF-TG	ENSMUSG00000015846 (TF-TG) ENSMUSG00000053317	false
5003	TF-TG	ENSMUSG00000015846 (TF-TG) ENSMUSG00000053334	false
5004	TF-TG	ENSMUSG00000015846 (TF-TG) ENSMUSG00000053460	false
5005	TF-TG	ENSMUSG00000015846 (TF-TG) ENSMUSG00000053470	false
5006	TF-TG	ENSMUSG00000015846 (TF-TG) ENSMUSG00000053580	false
5007	TF-TG	ENSMUSG00000015846 (TF-TG) ENSMUSG00000053581	false
5008	TF-TG	ENSMUSG00000015846 (TF-TG) ENSMUSG00000053604	false
5009	TF-TG	ENSMUSG00000015846 (TF-TG) ENSMUSG00000053617	false
5010	TF-TG	ENSMUSG00000015846 (TF-TG) ENSMUSG00000053702	false
5011	TF-TG	ENSMUSG00000015846 (TF-TG) ENSMUSG00000053765	false
5012	TF-TG	ENSMUSG00000015846 (TF-TG) ENSMUSG00000053768	false
5013	TF-TG	ENSMUSG00000015846 (TF-TG) ENSMUSG00000053783	false
5014	TF-TG	ENSMUSG00000015846 (TF-TG) ENSMUSG00000053846	false
5015	TF-TG	ENSMUSG00000015846 (TF-TG) ENSMUSG00000053862	false
5016	TF-TG	ENSMUSG00000015846 (TF-TG) ENSMUSG00000053965	false
5017	TF-TG	ENSMUSG00000015846 (TF-TG) ENSMUSG00000053985	false
5018	TF-TG	ENSMUSG00000015846 (TF-TG) ENSMUSG00000054128	false
5019	TF-TG	ENSMUSG00000015846 (TF-TG) ENSMUSG00000054150	false
5020	TF-TG	ENSMUSG00000015846 (TF-TG) ENSMUSG00000054169	false
5021	TF-TG	ENSMUSG00000015846 (TF-TG) ENSMUSG00000054200	false
5022	TF-TG	ENSMUSG00000015846 (TF-TG) ENSMUSG00000054342	false
5023	TF-TG	ENSMUSG00000015846 (TF-TG) ENSMUSG00000054422	false
5024	TF-TG	ENSMUSG00000015846 (TF-TG) ENSMUSG00000054423	false
5025	TF-TG	ENSMUSG00000015846 (TF-TG) ENSMUSG00000054428	false
5026	TF-TG	ENSMUSG00000015846 (TF-TG) ENSMUSG00000054453	false
5027	TF-TG	ENSMUSG00000015846 (TF-TG) ENSMUSG00000054469	false
5028	TF-TG	ENSMUSG00000015846 (TF-TG) ENSMUSG00000054474	false
5029	TF-TG	ENSMUSG00000015846 (TF-TG) ENSMUSG00000054484	false
5030	TF-TG	ENSMUSG00000015846 (TF-TG) ENSMUSG00000054582	false
5031	TF-TG	ENSMUSG00000015846 (TF-TG) ENSMUSG00000054598	false
5032	TF-TG	ENSMUSG00000015846 (TF-TG) ENSMUSG00000054630	false
5033	TF-TG	ENSMUSG00000015846 (TF-TG) ENSMUSG00000054640	false
5034	TF-TG	ENSMUSG00000015846 (TF-TG) ENSMUSG00000054717	false
5035	TF-TG	ENSMUSG00000015846 (TF-TG) ENSMUSG00000054733	false
5036	TF-TG	ENSMUSG00000015846 (TF-TG) ENSMUSG00000054764	false
5037	TF-TG	ENSMUSG00000015846 (TF-TG) ENSMUSG00000054793	false
5038	TF-TG	ENSMUSG00000015846 (TF-TG) ENSMUSG00000054855	false
5039	TF-TG	ENSMUSG00000015846 (TF-TG) ENSMUSG00000054893	false
5040	TF-TG	ENSMUSG00000015846 (TF-TG) ENSMUSG00000054920	false
5041	TF-TG	ENSMUSG00000015846 (TF-TG) ENSMUSG00000054932	false
5042	TF-TG	ENSMUSG00000015846 (TF-TG) ENSMUSG00000054958	false
5043	TF-TG	ENSMUSG00000015846 (TF-TG) ENSMUSG00000054967	false
5044	TF-TG	ENSMUSG00000015846 (TF-TG) ENSMUSG00000054978	false
5045	TF-TG	ENSMUSG00000015846 (TF-TG) ENSMUSG00000055114	false
5046	TF-TG	ENSMUSG00000015846 (TF-TG) ENSMUSG00000055150	false
5047	TF-TG	ENSMUSG00000015846 (TF-TG) ENSMUSG00000055172	false
5048	TF-TG	ENSMUSG00000015846 (TF-TG) ENSMUSG00000055214	false
5049	TF-TG	ENSMUSG00000015846 (TF-TG) ENSMUSG00000055407	false
5050	TF-TG	ENSMUSG00000015846 (TF-TG) ENSMUSG00000055485	false
5051	TF-TG	ENSMUSG00000015846 (TF-TG) ENSMUSG00000055493	false
5052	TF-TG	ENSMUSG00000015846 (TF-TG) ENSMUSG00000055538	false
5053	TF-TG	ENSMUSG00000015846 (TF-TG) ENSMUSG00000055567	false
5054	TF-TG	ENSMUSG00000015846 (TF-TG) ENSMUSG00000055610	false
5055	TF-TG	ENSMUSG00000015846 (TF-TG) ENSMUSG00000055639	false
5056	TF-TG	ENSMUSG00000015846 (TF-TG) ENSMUSG00000055675	false
5057	TF-TG	ENSMUSG00000015846 (TF-TG) ENSMUSG00000055730	false
5058	TF-TG	ENSMUSG00000015846 (TF-TG) ENSMUSG00000055745	false
5059	TF-TG	ENSMUSG00000015846 (TF-TG) ENSMUSG00000055809	false
5060	TF-TG	ENSMUSG00000015846 (TF-TG) ENSMUSG00000055912	false
5061	TF-TG	ENSMUSG00000015846 (TF-TG) ENSMUSG00000055963	false
5062	TF-TG	ENSMUSG00000015846 (TF-TG) ENSMUSG00000055978	false
5063	TF-TG	ENSMUSG00000015846 (TF-TG) ENSMUSG00000055980	false
5064	TF-TG	ENSMUSG00000015846 (TF-TG) ENSMUSG00000056019	false
5065	TF-TG	ENSMUSG00000015846 (TF-TG) ENSMUSG00000056035	false
5066	TF-TG	ENSMUSG00000015846 (TF-TG) ENSMUSG00000056069	false
5067	TF-TG	ENSMUSG00000015846 (TF-TG) ENSMUSG00000056162	false
5068	TF-TG	ENSMUSG00000015846 (TF-TG) ENSMUSG00000056185	false
5069	TF-TG	ENSMUSG00000015846 (TF-TG) ENSMUSG00000056296	false
5070	TF-TG	ENSMUSG00000015846 (TF-TG) ENSMUSG00000056413	false
5071	TF-TG	ENSMUSG00000015846 (TF-TG) ENSMUSG00000056457	false
5072	TF-TG	ENSMUSG00000015846 (TF-TG) ENSMUSG00000056492	false
5073	TF-TG	ENSMUSG00000015846 (TF-TG) ENSMUSG00000056529	false
5074	TF-TG	ENSMUSG00000015846 (TF-TG) ENSMUSG00000056592	false
5075	TF-TG	ENSMUSG00000015846 (TF-TG) ENSMUSG00000056602	false
5076	TF-TG	ENSMUSG00000015846 (TF-TG) ENSMUSG00000056632	false
5077	TF-TG	ENSMUSG00000015846 (TF-TG) ENSMUSG00000056648	false
5078	TF-TG	ENSMUSG00000015846 (TF-TG) ENSMUSG00000056671	false
5079	TF-TG	ENSMUSG00000015846 (TF-TG) ENSMUSG00000056724	false
5080	TF-TG	ENSMUSG00000015846 (TF-TG) ENSMUSG00000056737	false
5081	TF-TG	ENSMUSG00000015846 (TF-TG) ENSMUSG00000056758	false
5082	TF-TG	ENSMUSG00000015846 (TF-TG) ENSMUSG00000056832	false
5083	TF-TG	ENSMUSG00000015846 (TF-TG) ENSMUSG00000056888	false
5084	TF-TG	ENSMUSG00000015846 (TF-TG) ENSMUSG00000056895	false
5085	TF-TG	ENSMUSG00000015846 (TF-TG) ENSMUSG00000056973	false
5086	TF-TG	ENSMUSG00000015846 (TF-TG) ENSMUSG00000057074	false
5087	TF-TG	ENSMUSG00000015846 (TF-TG) ENSMUSG00000057092	false
5088	TF-TG	ENSMUSG00000015846 (TF-TG) ENSMUSG00000057176	false
5089	TF-TG	ENSMUSG00000015846 (TF-TG) ENSMUSG00000057182	false
5090	TF-TG	ENSMUSG00000015846 (TF-TG) ENSMUSG00000057229	false
5091	TF-TG	ENSMUSG00000015846 (TF-TG) ENSMUSG00000057335	false
5092	TF-TG	ENSMUSG00000015846 (TF-TG) ENSMUSG00000057346	false
5093	TF-TG	ENSMUSG00000015846 (TF-TG) ENSMUSG00000057400	false
5094	TF-TG	ENSMUSG00000015846 (TF-TG) ENSMUSG00000057604	false
5095	TF-TG	ENSMUSG00000015846 (TF-TG) ENSMUSG00000057614	false
5096	TF-TG	ENSMUSG00000015846 (TF-TG) ENSMUSG00000057666	false
5097	TF-TG	ENSMUSG00000015846 (TF-TG) ENSMUSG00000057706	false
5098	TF-TG	ENSMUSG00000015846 (TF-TG) ENSMUSG00000057716	false
5099	TF-TG	ENSMUSG00000015846 (TF-TG) ENSMUSG00000057719	false
5100	TF-TG	ENSMUSG00000015846 (TF-TG) ENSMUSG00000057880	false
5101	TF-TG	ENSMUSG00000015846 (TF-TG) ENSMUSG00000057897	false
5102	TF-TG	ENSMUSG00000015846 (TF-TG) ENSMUSG00000058063	false
5103	TF-TG	ENSMUSG00000015846 (TF-TG) ENSMUSG00000058070	false
5104	TF-TG	ENSMUSG00000015846 (TF-TG) ENSMUSG00000058145	false
5105	TF-TG	ENSMUSG00000015846 (TF-TG) ENSMUSG00000058216	false
5106	TF-TG	ENSMUSG00000015846 (TF-TG) ENSMUSG00000058260	false
5107	TF-TG	ENSMUSG00000015846 (TF-TG) ENSMUSG00000058290	false
5108	TF-TG	ENSMUSG00000015846 (TF-TG) ENSMUSG00000058297	false
5109	TF-TG	ENSMUSG00000015846 (TF-TG) ENSMUSG00000058454	false
5110	TF-TG	ENSMUSG00000015846 (TF-TG) ENSMUSG00000058586	false
5111	TF-TG	ENSMUSG00000015846 (TF-TG) ENSMUSG00000058624	false
5112	TF-TG	ENSMUSG00000015846 (TF-TG) ENSMUSG00000058656	false
5113	TF-TG	ENSMUSG00000015846 (TF-TG) ENSMUSG00000058672	false
5114	TF-TG	ENSMUSG00000015846 (TF-TG) ENSMUSG00000058794	false
5115	TF-TG	ENSMUSG00000015846 (TF-TG) ENSMUSG00000058952	false
5116	TF-TG	ENSMUSG00000015846 (TF-TG) ENSMUSG00000058975	false
5117	TF-TG	ENSMUSG00000015846 (TF-TG) ENSMUSG00000059013	false
5118	TF-TG	ENSMUSG00000015846 (TF-TG) ENSMUSG00000059060	false
5119	TF-TG	ENSMUSG00000015846 (TF-TG) ENSMUSG00000059142	false
5120	TF-TG	ENSMUSG00000015846 (TF-TG) ENSMUSG00000059149	false
5121	TF-TG	ENSMUSG00000015846 (TF-TG) ENSMUSG00000059401	false
5122	TF-TG	ENSMUSG00000015846 (TF-TG) ENSMUSG00000059406	false
5123	TF-TG	ENSMUSG00000015846 (TF-TG) ENSMUSG00000059412	false
5124	TF-TG	ENSMUSG00000015846 (TF-TG) ENSMUSG00000059493	false
5125	TF-TG	ENSMUSG00000015846 (TF-TG) ENSMUSG00000059540	false
5126	TF-TG	ENSMUSG00000015846 (TF-TG) ENSMUSG00000059654	false
5127	TF-TG	ENSMUSG00000015846 (TF-TG) ENSMUSG00000059668	false
5128	TF-TG	ENSMUSG00000015846 (TF-TG) ENSMUSG00000059713	false
[truncated: 35,066 more rows]
