# Supplementary material for: Regulatory network analysis of Paneth cell and goblet cell enriched gut organoids using transcriptomics approaches
Source: Royal Society of Chemistry journal article supplement (doi:10.1039/c9mo00130a), 2019-12-10
Supplement: c9mo00130a1.cys [file c9mo00130a1.cys › CytoscapeSession-2019_09_26-22_01/tables/40195-1%3A+Cluster+1+%28Score%3A+17.048%29/LOCAL_ATTRS-org.cytoscape.model.CyEdge-1%3A+Cluster+1+%28Score%3A+17.048%29+default+edge.cytable]

CyCSV-Version	1
SUID	interaction	name	selected
java.lang.Long	java.lang.String	java.lang.String	java.lang.Boolean
1: Cluster 1 (Score: 17.048) default edge
17727	TF-TG	ENSMUSG00000024912 (TF-TG) ENSMUSG00000045027	false
25918	TF-TG	ENSMUSG00000036036 (TF-TG) ENSMUSG00000026278	false
14654	TF-TG	ENSMUSG00000020889 (TF-TG) ENSMUSG00000049866	false
15677	TF-TG	ENSMUSG00000018899 (TF-TG) ENSMUSG00000047534	false
17724	TF-TG	ENSMUSG00000024912 (TF-TG) ENSMUSG00000043419	false
14652	TF-TG	ENSMUSG00000020889 (TF-TG) ENSMUSG00000049807	false
17723	TF-TG	ENSMUSG00000024912 (TF-TG) ENSMUSG00000042842	false
13627	TF-TG	ENSMUSG00000020889 (TF-TG) ENSMUSG00000025969	false
15673	TF-TG	ENSMUSG00000018899 (TF-TG) ENSMUSG00000046711	false
17719	TF-TG	ENSMUSG00000024912 (TF-TG) ENSMUSG00000041143	false
13623	TF-TG	ENSMUSG00000020889 (TF-TG) ENSMUSG00000025903	false
3383	TF-TG	ENSMUSG00000015846 (TF-TG) ENSMUSG00000018899	false
17718	TF-TG	ENSMUSG00000024912 (TF-TG) ENSMUSG00000041075	false
25909	TF-TG	ENSMUSG00000036036 (TF-TG) ENSMUSG00000025969	false
17714	TF-TG	ENSMUSG00000024912 (TF-TG) ENSMUSG00000040249	false
25906	TF-TG	ENSMUSG00000036036 (TF-TG) ENSMUSG00000025903	false
18736	TF-TG	ENSMUSG00000034957 (TF-TG) ENSMUSG00000021226	false
3376	TF-TG	ENSMUSG00000015846 (TF-TG) ENSMUSG00000018740	false
3373	TF-TG	ENSMUSG00000015846 (TF-TG) ENSMUSG00000018593	false
15660	TF-TG	ENSMUSG00000018899 (TF-TG) ENSMUSG00000045027	false
13608	TF-TG	ENSMUSG00000020889 (TF-TG) ENSMUSG00000025584	false
11560	TF-lincRNA	ENSMUSG00000024431 (TF-lincRNA) ENSMUSG00000085024	false
6440	TF-TG	ENSMUSG00000022383 (TF-TG) ENSMUSG00000041143	false
17703	TF-TG	ENSMUSG00000024912 (TF-TG) ENSMUSG00000037946	false
9511	TF-TG	ENSMUSG00000024431 (TF-TG) ENSMUSG00000020387	false
25894	TF-TG	ENSMUSG00000036036 (TF-TG) ENSMUSG00000025545	false
6438	TF-TG	ENSMUSG00000022383 (TF-TG) ENSMUSG00000041075	false
14629	TF-TG	ENSMUSG00000020889 (TF-TG) ENSMUSG00000048895	false
17700	TF-TG	ENSMUSG00000024912 (TF-TG) ENSMUSG00000037679	false
13604	TF-TG	ENSMUSG00000020889 (TF-TG) ENSMUSG00000025545	false
9508	TF-TG	ENSMUSG00000024431 (TF-TG) ENSMUSG00000020334	false
3364	TF-TG	ENSMUSG00000015846 (TF-TG) ENSMUSG00000018143	false
29987	TF-TG	ENSMUSG00000030353 (TF-TG) ENSMUSG00000054717	false
4385	TF-TG	ENSMUSG00000015846 (TF-TG) ENSMUSG00000035164	false
3360	TF-TG	ENSMUSG00000015846 (TF-TG) ENSMUSG00000017724	false
19742	TF-TG	ENSMUSG00000034957 (TF-TG) ENSMUSG00000037946	false
17694	TF-TG	ENSMUSG00000024912 (TF-TG) ENSMUSG00000035900	false
15645	TF-TG	ENSMUSG00000018899 (TF-TG) ENSMUSG00000042816	false
5405	TF-TG	ENSMUSG00000015846 (TF-TG) ENSMUSG00000098557	false
9500	TF-TG	ENSMUSG00000024431 (TF-TG) ENSMUSG00000020218	false
18715	TF-TG	ENSMUSG00000034957 (TF-TG) ENSMUSG00000020897	false
9498	TF-TG	ENSMUSG00000024431 (TF-TG) ENSMUSG00000020184	false
18712	TF-TG	ENSMUSG00000034957 (TF-TG) ENSMUSG00000020889	false
15640	TF-TG	ENSMUSG00000018899 (TF-TG) ENSMUSG00000042500	false
10519	TF-TG	ENSMUSG00000024431 (TF-TG) ENSMUSG00000036036	false
4371	TF-TG	ENSMUSG00000015846 (TF-TG) ENSMUSG00000034781	false
19729	TF-TG	ENSMUSG00000034957 (TF-TG) ENSMUSG00000037679	false
10513	TF-TG	ENSMUSG00000024431 (TF-TG) ENSMUSG00000035900	false
25871	TF-TG	ENSMUSG00000036036 (TF-TG) ENSMUSG00000024912	false
15630	TF-TG	ENSMUSG00000018899 (TF-TG) ENSMUSG00000041143	false
29965	TF-TG	ENSMUSG00000030353 (TF-TG) ENSMUSG00000052392	false
15629	TF-TG	ENSMUSG00000018899 (TF-TG) ENSMUSG00000041075	false
6413	TF-TG	ENSMUSG00000022383 (TF-TG) ENSMUSG00000040249	false
9481	TF-TG	ENSMUSG00000024431 (TF-TG) ENSMUSG00000019982	false
17671	TF-TG	ENSMUSG00000024912 (TF-TG) ENSMUSG00000031987	false
17670	TF-TG	ENSMUSG00000024912 (TF-TG) ENSMUSG00000031788	false
15619	TF-TG	ENSMUSG00000018899 (TF-TG) ENSMUSG00000039967	false
6403	TF-TG	ENSMUSG00000022383 (TF-TG) ENSMUSG00000039967	false
17666	TF-TG	ENSMUSG00000024912 (TF-TG) ENSMUSG00000029761	false
15618	TF-TG	ENSMUSG00000018899 (TF-TG) ENSMUSG00000039952	false
6401	TF-TG	ENSMUSG00000022383 (TF-TG) ENSMUSG00000039952	false
29951	TF-TG	ENSMUSG00000030353 (TF-TG) ENSMUSG00000051335	false
25855	TF-TG	ENSMUSG00000036036 (TF-TG) ENSMUSG00000024556	false
19710	TF-TG	ENSMUSG00000034957 (TF-TG) ENSMUSG00000037405	false
17662	TF-TG	ENSMUSG00000024912 (TF-TG) ENSMUSG00000028849	false
15614	TF-TG	ENSMUSG00000018899 (TF-TG) ENSMUSG00000039813	false
6396	TF-TG	ENSMUSG00000022383 (TF-TG) ENSMUSG00000039813	false
14583	TF-TG	ENSMUSG00000020889 (TF-TG) ENSMUSG00000047534	false
29942	TF-TG	ENSMUSG00000030353 (TF-TG) ENSMUSG00000050395	false
18675	TF-TG	ENSMUSG00000034957 (TF-TG) ENSMUSG00000020387	false
11506	TF-TG	ENSMUSG00000024431 (TF-TG) ENSMUSG00000098557	false
3314	TF-TG	ENSMUSG00000015846 (TF-TG) ENSMUSG00000014361	false
13553	TF-TG	ENSMUSG00000020889 (TF-TG) ENSMUSG00000024912	false
18671	TF-TG	ENSMUSG00000034957 (TF-TG) ENSMUSG00000020334	false
10476	TF-TG	ENSMUSG00000024431 (TF-TG) ENSMUSG00000035164	false
29931	TF-TG	ENSMUSG00000030353 (TF-TG) ENSMUSG00000049866	false
29930	TF-TG	ENSMUSG00000030353 (TF-TG) ENSMUSG00000049807	false
17642	TF-TG	ENSMUSG00000024912 (TF-TG) ENSMUSG00000026278	false
18663	TF-TG	ENSMUSG00000034957 (TF-TG) ENSMUSG00000020218	false
17639	TF-TG	ENSMUSG00000024912 (TF-TG) ENSMUSG00000025903	false
14567	TF-TG	ENSMUSG00000020889 (TF-TG) ENSMUSG00000046711	false
9447	TF-TG	ENSMUSG00000024431 (TF-TG) ENSMUSG00000018899	false
18661	TF-TG	ENSMUSG00000034957 (TF-TG) ENSMUSG00000020184	false
15588	TF-TG	ENSMUSG00000018899 (TF-TG) ENSMUSG00000037946	false
3300	TF-TG	ENSMUSG00000015846 (TF-TG) ENSMUSG00000011752	false
25826	TF-TG	ENSMUSG00000036036 (TF-TG) ENSMUSG00000023940	false
15586	TF-TG	ENSMUSG00000018899 (TF-TG) ENSMUSG00000037679	false
25824	TF-TG	ENSMUSG00000036036 (TF-TG) ENSMUSG00000023809	false
9440	TF-TG	ENSMUSG00000024431 (TF-TG) ENSMUSG00000018740	false
10463	TF-TG	ENSMUSG00000024431 (TF-TG) ENSMUSG00000034781	false
4319	TF-TG	ENSMUSG00000015846 (TF-TG) ENSMUSG00000033545	false
15581	TF-TG	ENSMUSG00000018899 (TF-TG) ENSMUSG00000037405	false
9437	TF-TG	ENSMUSG00000024431 (TF-TG) ENSMUSG00000018593	false
3293	TF-TG	ENSMUSG00000015846 (TF-TG) ENSMUSG00000010663	false
29916	TF-TG	ENSMUSG00000030353 (TF-TG) ENSMUSG00000048895	false
18646	TF-TG	ENSMUSG00000034957 (TF-TG) ENSMUSG00000019982	false
13525	TF-TG	ENSMUSG00000020889 (TF-TG) ENSMUSG00000024590	false
25812	TF-TG	ENSMUSG00000036036 (TF-TG) ENSMUSG00000023004	false
13524	TF-TG	ENSMUSG00000020889 (TF-TG) ENSMUSG00000024556	false
9426	TF-TG	ENSMUSG00000024431 (TF-TG) ENSMUSG00000018143	false
17616	TF-TG	ENSMUSG00000024912 (TF-TG) ENSMUSG00000023809	false
15568	TF-TG	ENSMUSG00000018899 (TF-TG) ENSMUSG00000036036	false
15566	TF-TG	ENSMUSG00000018899 (TF-TG) ENSMUSG00000035900	false
17613	TF-TG	ENSMUSG00000024912 (TF-TG) ENSMUSG00000023004	false
9421	TF-TG	ENSMUSG00000024431 (TF-TG) ENSMUSG00000017724	false
17610	TF-TG	ENSMUSG00000024912 (TF-TG) ENSMUSG00000022528	false
19655	TF-TG	ENSMUSG00000034957 (TF-TG) ENSMUSG00000036036	false
13511	TF-TG	ENSMUSG00000020889 (TF-TG) ENSMUSG00000024431	false
15558	TF-TG	ENSMUSG00000018899 (TF-TG) ENSMUSG00000035164	false
20677	TF-lincRNA	ENSMUSG00000034957 (TF-lincRNA) ENSMUSG00000085024	false
29892	TF-TG	ENSMUSG00000030353 (TF-TG) ENSMUSG00000047534	false
6339	TF-TG	ENSMUSG00000022383 (TF-TG) ENSMUSG00000037946	false
17602	TF-TG	ENSMUSG00000024912 (TF-TG) ENSMUSG00000021725	false
25794	TF-TG	ENSMUSG00000036036 (TF-TG) ENSMUSG00000022543	false
19649	TF-TG	ENSMUSG00000034957 (TF-TG) ENSMUSG00000035900	false
15553	TF-TG	ENSMUSG00000018899 (TF-TG) ENSMUSG00000034781	false
25792	TF-TG	ENSMUSG00000036036 (TF-TG) ENSMUSG00000022528	false
14528	TF-TG	ENSMUSG00000020889 (TF-TG) ENSMUSG00000045027	false
17598	TF-TG	ENSMUSG00000024912 (TF-TG) ENSMUSG00000020889	false
29883	TF-TG	ENSMUSG00000030353 (TF-TG) ENSMUSG00000046711	false
17593	TF-TG	ENSMUSG00000024912 (TF-TG) ENSMUSG00000020387	false
6329	TF-TG	ENSMUSG00000022383 (TF-TG) ENSMUSG00000037679	false
17592	TF-TG	ENSMUSG00000024912 (TF-TG) ENSMUSG00000020334	false
25784	TF-TG	ENSMUSG00000036036 (TF-TG) ENSMUSG00000022383	false
17590	TF-TG	ENSMUSG00000024912 (TF-TG) ENSMUSG00000020184	false
18613	TF-TG	ENSMUSG00000034957 (TF-TG) ENSMUSG00000018899	false
25781	TF-TG	ENSMUSG00000036036 (TF-TG) ENSMUSG00000022265	false
15539	TF-TG	ENSMUSG00000018899 (TF-TG) ENSMUSG00000033545	false
17586	TF-TG	ENSMUSG00000024912 (TF-TG) ENSMUSG00000018740	false
17585	TF-TG	ENSMUSG00000024912 (TF-TG) ENSMUSG00000018593	false
6320	TF-TG	ENSMUSG00000022383 (TF-TG) ENSMUSG00000037405	false
18606	TF-TG	ENSMUSG00000034957 (TF-TG) ENSMUSG00000018740	false
18603	TF-TG	ENSMUSG00000034957 (TF-TG) ENSMUSG00000018593	false
25771	TF-TG	ENSMUSG00000036036 (TF-TG) ENSMUSG00000022105	false
10411	TF-TG	ENSMUSG00000024431 (TF-TG) ENSMUSG00000033545	false
17577	TF-TG	ENSMUSG00000024912 (TF-TG) ENSMUSG00000015846	false
17572	TF-TG	ENSMUSG00000024912 (TF-TG) ENSMUSG00000014361	false
5283	TF-TG	ENSMUSG00000015846 (TF-TG) ENSMUSG00000072620	false
18594	TF-TG	ENSMUSG00000034957 (TF-TG) ENSMUSG00000018143	false
13474	TF-TG	ENSMUSG00000020889 (TF-TG) ENSMUSG00000023940	false
9376	TF-TG	ENSMUSG00000024431 (TF-TG) ENSMUSG00000014361	false
29855	TF-TG	ENSMUSG00000030353 (TF-TG) ENSMUSG00000045027	false
17567	TF-TG	ENSMUSG00000024912 (TF-TG) ENSMUSG00000010663	false
18590	TF-TG	ENSMUSG00000034957 (TF-TG) ENSMUSG00000017724	false
19612	TF-TG	ENSMUSG00000034957 (TF-TG) ENSMUSG00000035164	false
3228	TF-TG	ENSMUSG00000015846 (TF-TG) ENSMUSG00000004709	false
14491	TF-TG	ENSMUSG00000020889 (TF-TG) ENSMUSG00000043419	false
13467	TF-TG	ENSMUSG00000020889 (TF-TG) ENSMUSG00000023809	false
25753	TF-TG	ENSMUSG00000036036 (TF-TG) ENSMUSG00000021725	false
25752	TF-TG	ENSMUSG00000036036 (TF-TG) ENSMUSG00000021701	false
9364	TF-TG	ENSMUSG00000024431 (TF-TG) ENSMUSG00000011752	false
29843	TF-TG	ENSMUSG00000030353 (TF-TG) ENSMUSG00000043419	false
6291	TF-TG	ENSMUSG00000022383 (TF-TG) ENSMUSG00000036036	false
19601	TF-TG	ENSMUSG00000034957 (TF-TG) ENSMUSG00000034781	false
15505	TF-TG	ENSMUSG00000018899 (TF-TG) ENSMUSG00000031788	false
6289	TF-TG	ENSMUSG00000022383 (TF-TG) ENSMUSG00000035900	false
14480	TF-TG	ENSMUSG00000020889 (TF-TG) ENSMUSG00000042842	false
29839	TF-TG	ENSMUSG00000030353 (TF-TG) ENSMUSG00000042842	false
14479	TF-TG	ENSMUSG00000020889 (TF-TG) ENSMUSG00000042816	false
29838	TF-TG	ENSMUSG00000030353 (TF-TG) ENSMUSG00000042816	false
20622	TF-TG	ENSMUSG00000034957 (TF-TG) ENSMUSG00000098557	false
15501	TF-TG	ENSMUSG00000018899 (TF-TG) ENSMUSG00000031629	false
9357	TF-TG	ENSMUSG00000024431 (TF-TG) ENSMUSG00000010663	false
25740	TF-TG	ENSMUSG00000036036 (TF-TG) ENSMUSG00000021226	false
13447	TF-TG	ENSMUSG00000020889 (TF-TG) ENSMUSG00000023004	false
18564	TF-TG	ENSMUSG00000034957 (TF-TG) ENSMUSG00000015846	false
14465	TF-TG	ENSMUSG00000020889 (TF-TG) ENSMUSG00000042500	false
15487	TF-TG	ENSMUSG00000018899 (TF-TG) ENSMUSG00000031004	false
15485	TF-TG	ENSMUSG00000018899 (TF-TG) ENSMUSG00000030747	false
4221	TF-TG	ENSMUSG00000015846 (TF-TG) ENSMUSG00000031987	false
25724	TF-TG	ENSMUSG00000036036 (TF-TG) ENSMUSG00000020889	false
6266	TF-TG	ENSMUSG00000022383 (TF-TG) ENSMUSG00000035164	false
11381	TF-TG	ENSMUSG00000024431 (TF-TG) ENSMUSG00000072620	false
6259	TF-TG	ENSMUSG00000022383 (TF-TG) ENSMUSG00000034957	false
18545	TF-TG	ENSMUSG00000034957 (TF-TG) ENSMUSG00000014361	false
6255	TF-TG	ENSMUSG00000022383 (TF-TG) ENSMUSG00000034781	false
29805	TF-TG	ENSMUSG00000030353 (TF-TG) ENSMUSG00000041143	false
29802	TF-TG	ENSMUSG00000030353 (TF-TG) ENSMUSG00000041075	false
25704	TF-TG	ENSMUSG00000036036 (TF-TG) ENSMUSG00000020387	false
15464	TF-TG	ENSMUSG00000018899 (TF-TG) ENSMUSG00000029095	false
4200	TF-TG	ENSMUSG00000015846 (TF-TG) ENSMUSG00000031788	false
25701	TF-TG	ENSMUSG00000036036 (TF-TG) ENSMUSG00000020334	false
18532	TF-TG	ENSMUSG00000034957 (TF-TG) ENSMUSG00000011752	false
26724	TF-TG	ENSMUSG00000036036 (TF-TG) ENSMUSG00000072620	false
15460	TF-TG	ENSMUSG00000018899 (TF-TG) ENSMUSG00000028849	false
13411	TF-TG	ENSMUSG00000020889 (TF-TG) ENSMUSG00000022543	false
13409	TF-TG	ENSMUSG00000020889 (TF-TG) ENSMUSG00000022528	false
25695	TF-TG	ENSMUSG00000036036 (TF-TG) ENSMUSG00000020218	false
25693	TF-TG	ENSMUSG00000036036 (TF-TG) ENSMUSG00000020184	false
18524	TF-TG	ENSMUSG00000034957 (TF-TG) ENSMUSG00000010663	false
19547	TF-TG	ENSMUSG00000034957 (TF-TG) ENSMUSG00000033545	false
4187	TF-TG	ENSMUSG00000015846 (TF-TG) ENSMUSG00000031629	false
29785	TF-TG	ENSMUSG00000030353 (TF-TG) ENSMUSG00000040249	false
13400	TF-TG	ENSMUSG00000020889 (TF-TG) ENSMUSG00000022383	false
5207	TF-TG	ENSMUSG00000015846 (TF-TG) ENSMUSG00000066026	false
29782	TF-TG	ENSMUSG00000030353 (TF-TG) ENSMUSG00000039967	false
5206	TF-TG	ENSMUSG00000015846 (TF-TG) ENSMUSG00000065952	false
29780	TF-TG	ENSMUSG00000030353 (TF-TG) ENSMUSG00000039952	false
13396	TF-TG	ENSMUSG00000020889 (TF-TG) ENSMUSG00000022265	false
25683	TF-TG	ENSMUSG00000036036 (TF-TG) ENSMUSG00000019982	false
29778	TF-TG	ENSMUSG00000030353 (TF-TG) ENSMUSG00000039813	false
14416	TF-TG	ENSMUSG00000020889 (TF-TG) ENSMUSG00000041143	false
14412	TF-TG	ENSMUSG00000020889 (TF-TG) ENSMUSG00000041075	false
6220	TF-TG	ENSMUSG00000022383 (TF-TG) ENSMUSG00000033545	false
9289	TF-TG	ENSMUSG00000024431 (TF-TG) ENSMUSG00000004709	false
10311	TF-TG	ENSMUSG00000024431 (TF-TG) ENSMUSG00000031987	false
3141	TF-TG	ENSMUSG00000015846 (TF-TG) ENSMUSG00000024431	false
13380	TF-TG	ENSMUSG00000020889 (TF-TG) ENSMUSG00000022105	false
15427	TF-TG	ENSMUSG00000018899 (TF-TG) ENSMUSG00000027326	false
3138	TF-TG	ENSMUSG00000015846 (TF-TG) ENSMUSG00000022383	false
25662	TF-TG	ENSMUSG00000036036 (TF-TG) ENSMUSG00000018899	false
26682	TF-TG	ENSMUSG00000036036 (TF-TG) ENSMUSG00000066026	false
26681	TF-TG	ENSMUSG00000036036 (TF-TG) ENSMUSG00000065952	false
25657	TF-TG	ENSMUSG00000036036 (TF-TG) ENSMUSG00000018740	false
25655	TF-TG	ENSMUSG00000036036 (TF-TG) ENSMUSG00000018593	false
10292	TF-TG	ENSMUSG00000024431 (TF-TG) ENSMUSG00000031788	false
4145	TF-TG	ENSMUSG00000015846 (TF-TG) ENSMUSG00000031004	false
25648	TF-TG	ENSMUSG00000036036 (TF-TG) ENSMUSG00000018143	false
25644	TF-TG	ENSMUSG00000036036 (TF-TG) ENSMUSG00000017724	false
15403	TF-TG	ENSMUSG00000018899 (TF-TG) ENSMUSG00000026494	false
13355	TF-TG	ENSMUSG00000020889 (TF-TG) ENSMUSG00000021725	false
13353	TF-TG	ENSMUSG00000020889 (TF-TG) ENSMUSG00000021701	false
10280	TF-TG	ENSMUSG00000024431 (TF-TG) ENSMUSG00000031629	false
15399	TF-TG	ENSMUSG00000018899 (TF-TG) ENSMUSG00000026278	false
14374	TF-TG	ENSMUSG00000020889 (TF-TG) ENSMUSG00000040249	false
4134	TF-TG	ENSMUSG00000015846 (TF-TG) ENSMUSG00000030747	false
11301	TF-TG	ENSMUSG00000024431 (TF-TG) ENSMUSG00000066026	false
11300	TF-TG	ENSMUSG00000024431 (TF-TG) ENSMUSG00000065952	false
29731	TF-TG	ENSMUSG00000030353 (TF-TG) ENSMUSG00000037946	false
15390	TF-TG	ENSMUSG00000018899 (TF-TG) ENSMUSG00000025969	false
25628	TF-TG	ENSMUSG00000036036 (TF-TG) ENSMUSG00000015846	false
29723	TF-TG	ENSMUSG00000030353 (TF-TG) ENSMUSG00000037679	false
18456	TF-TG	ENSMUSG00000034957 (TF-TG) ENSMUSG00000004709	false
15384	TF-TG	ENSMUSG00000018899 (TF-TG) ENSMUSG00000025584	false
14360	TF-TG	ENSMUSG00000020889 (TF-TG) ENSMUSG00000039967	false
6168	TF-TG	ENSMUSG00000022383 (TF-TG) ENSMUSG00000031987	false
4119	TF-TG	ENSMUSG00000015846 (TF-TG) ENSMUSG00000030353	false
14358	TF-TG	ENSMUSG00000020889 (TF-TG) ENSMUSG00000039952	false
13332	TF-TG	ENSMUSG00000020889 (TF-TG) ENSMUSG00000021226	false
20498	TF-TG	ENSMUSG00000034957 (TF-TG) ENSMUSG00000072620	false
25616	TF-TG	ENSMUSG00000036036 (TF-TG) ENSMUSG00000014361	false
14352	TF-TG	ENSMUSG00000020889 (TF-TG) ENSMUSG00000039813	false
29711	TF-TG	ENSMUSG00000030353 (TF-TG) ENSMUSG00000037405	false
26633	TF-TG	ENSMUSG00000036036 (TF-TG) ENSMUSG00000059013	false
6152	TF-TG	ENSMUSG00000022383 (TF-TG) ENSMUSG00000031788	false
25606	TF-TG	ENSMUSG00000036036 (TF-TG) ENSMUSG00000011752	false
15366	TF-TG	ENSMUSG00000018899 (TF-TG) ENSMUSG00000024590	false
15365	TF-TG	ENSMUSG00000018899 (TF-TG) ENSMUSG00000024556	false
15363	TF-TG	ENSMUSG00000018899 (TF-TG) ENSMUSG00000024431	false
25601	TF-TG	ENSMUSG00000036036 (TF-TG) ENSMUSG00000010663	false
6145	TF-TG	ENSMUSG00000022383 (TF-TG) ENSMUSG00000031629	false
13310	TF-TG	ENSMUSG00000020889 (TF-TG) ENSMUSG00000020897	false
5117	TF-TG	ENSMUSG00000015846 (TF-TG) ENSMUSG00000059013	false
19451	TF-TG	ENSMUSG00000034957 (TF-TG) ENSMUSG00000031987	false
15352	TF-TG	ENSMUSG00000018899 (TF-TG) ENSMUSG00000023940	false
10232	TF-TG	ENSMUSG00000024431 (TF-TG) ENSMUSG00000031004	false
4088	TF-TG	ENSMUSG00000015846 (TF-TG) ENSMUSG00000029761	false
29686	TF-TG	ENSMUSG00000030353 (TF-TG) ENSMUSG00000036036	false
15349	TF-TG	ENSMUSG00000018899 (TF-TG) ENSMUSG00000023809	false
9203	TF-TG	ENSMUSG00000024431 (TF-TG) ENSMUSG00000029167	false
29682	TF-TG	ENSMUSG00000030353 (TF-TG) ENSMUSG00000035900	false
9202	TF-TG	ENSMUSG00000024431 (TF-TG) ENSMUSG00000015846	false
15343	TF-TG	ENSMUSG00000018899 (TF-TG) ENSMUSG00000023004	false
6126	TF-TG	ENSMUSG00000022383 (TF-TG) ENSMUSG00000031004	false
10221	TF-TG	ENSMUSG00000024431 (TF-TG) ENSMUSG00000030747	false
6120	TF-TG	ENSMUSG00000022383 (TF-TG) ENSMUSG00000030747	false
19431	TF-TG	ENSMUSG00000034957 (TF-TG) ENSMUSG00000031788	false
29667	TF-TG	ENSMUSG00000030353 (TF-TG) ENSMUSG00000035164	false
29662	TF-TG	ENSMUSG00000030353 (TF-TG) ENSMUSG00000034781	false
10206	TF-TG	ENSMUSG00000024431 (TF-TG) ENSMUSG00000030353	false
6110	TF-TG	ENSMUSG00000022383 (TF-TG) ENSMUSG00000030353	false
26589	TF-TG	ENSMUSG00000036036 (TF-TG) ENSMUSG00000054717	false
19417	TF-TG	ENSMUSG00000034957 (TF-TG) ENSMUSG00000031629	false
26585	TF-TG	ENSMUSG00000036036 (TF-TG) ENSMUSG00000054342	false
25560	TF-TG	ENSMUSG00000036036 (TF-TG) ENSMUSG00000004709	false
15319	TF-TG	ENSMUSG00000018899 (TF-TG) ENSMUSG00000022105	false
13271	TF-TG	ENSMUSG00000020889 (TF-TG) ENSMUSG00000020387	false
13268	TF-TG	ENSMUSG00000020889 (TF-TG) ENSMUSG00000020334	false
4050	TF-TG	ENSMUSG00000015846 (TF-TG) ENSMUSG00000029167	false
15310	TF-TG	ENSMUSG00000018899 (TF-TG) ENSMUSG00000021725	false
13261	TF-TG	ENSMUSG00000020889 (TF-TG) ENSMUSG00000020218	false
15308	TF-TG	ENSMUSG00000018899 (TF-TG) ENSMUSG00000021701	false
13259	TF-TG	ENSMUSG00000020889 (TF-TG) ENSMUSG00000020184	false
29642	TF-TG	ENSMUSG00000030353 (TF-TG) ENSMUSG00000033545	false
20426	TF-TG	ENSMUSG00000034957 (TF-TG) ENSMUSG00000066026	false
20425	TF-TG	ENSMUSG00000034957 (TF-TG) ENSMUSG00000065952	false
4041	TF-TG	ENSMUSG00000015846 (TF-TG) ENSMUSG00000029095	false
11208	TF-TG	ENSMUSG00000024431 (TF-TG) ENSMUSG00000059013	false
6088	TF-TG	ENSMUSG00000022383 (TF-TG) ENSMUSG00000029761	false
18375	TF-TG	ENSMUSG00000034957 (TF-TG) ENSMUSG00000022105	false
15302	TF-TG	ENSMUSG00000018899 (TF-TG) ENSMUSG00000021226	false
18370	TF-TG	ENSMUSG00000022528 (TF-TG) ENSMUSG00000098557	false
15295	TF-TG	ENSMUSG00000018899 (TF-TG) ENSMUSG00000020897	false
10174	TF-TG	ENSMUSG00000024431 (TF-TG) ENSMUSG00000029761	false
4030	TF-TG	ENSMUSG00000015846 (TF-TG) ENSMUSG00000028849	false
15292	TF-TG	ENSMUSG00000018899 (TF-TG) ENSMUSG00000020889	false
14265	TF-TG	ENSMUSG00000020889 (TF-TG) ENSMUSG00000037946	false
28600	TF-lincRNA	ENSMUSG00000019982 (TF-lincRNA) ENSMUSG00000085024	false
18359	TF-TG	ENSMUSG00000022528 (TF-TG) ENSMUSG00000066026	false
26548	TF-TG	ENSMUSG00000036036 (TF-TG) ENSMUSG00000051335	false
18352	TF-TG	ENSMUSG00000022528 (TF-TG) ENSMUSG00000059013	false
6063	TF-TG	ENSMUSG00000022383 (TF-TG) ENSMUSG00000029167	false
28589	TF-TG	ENSMUSG00000019982 (TF-TG) ENSMUSG00000072620	false
19372	TF-TG	ENSMUSG00000034957 (TF-TG) ENSMUSG00000031004	false
18348	TF-TG	ENSMUSG00000022528 (TF-TG) ENSMUSG00000054342	false
15276	TF-TG	ENSMUSG00000018899 (TF-TG) ENSMUSG00000020387	false
14252	TF-TG	ENSMUSG00000020889 (TF-TG) ENSMUSG00000037679	false
28587	TF-TG	ENSMUSG00000019982 (TF-TG) ENSMUSG00000066026	false
15275	TF-TG	ENSMUSG00000018899 (TF-TG) ENSMUSG00000020334	false
5034	TF-TG	ENSMUSG00000015846 (TF-TG) ENSMUSG00000054717	false
15273	TF-TG	ENSMUSG00000018899 (TF-TG) ENSMUSG00000020218	false
6057	TF-TG	ENSMUSG00000022383 (TF-TG) ENSMUSG00000029095	false
18343	TF-TG	ENSMUSG00000022528 (TF-TG) ENSMUSG00000051335	false
26535	TF-TG	ENSMUSG00000036036 (TF-TG) ENSMUSG00000050395	false
18340	TF-TG	ENSMUSG00000022528 (TF-TG) ENSMUSG00000048895	false
6051	TF-TG	ENSMUSG00000022383 (TF-TG) ENSMUSG00000028849	false
15266	TF-TG	ENSMUSG00000018899 (TF-TG) ENSMUSG00000019982	false
18337	TF-TG	ENSMUSG00000022528 (TF-TG) ENSMUSG00000046711	false
13216	TF-TG	ENSMUSG00000020889 (TF-TG) ENSMUSG00000018899	false
19359	TF-TG	ENSMUSG00000034957 (TF-TG) ENSMUSG00000030747	false
5022	TF-TG	ENSMUSG00000015846 (TF-TG) ENSMUSG00000054342	false
26525	TF-TG	ENSMUSG00000036036 (TF-TG) ENSMUSG00000049866	false
29596	TF-TG	ENSMUSG00000030353 (TF-TG) ENSMUSG00000031987	false
14236	TF-TG	ENSMUSG00000020889 (TF-TG) ENSMUSG00000037405	false
26523	TF-TG	ENSMUSG00000036036 (TF-TG) ENSMUSG00000049807	false
13210	TF-TG	ENSMUSG00000020889 (TF-TG) ENSMUSG00000018740	false
28569	TF-TG	ENSMUSG00000019982 (TF-TG) ENSMUSG00000054717	false
15256	TF-TG	ENSMUSG00000018899 (TF-TG) ENSMUSG00000018740	false
18327	TF-TG	ENSMUSG00000022528 (TF-TG) ENSMUSG00000042500	false
13207	TF-TG	ENSMUSG00000020889 (TF-TG) ENSMUSG00000018593	false
15254	TF-TG	ENSMUSG00000018899 (TF-TG) ENSMUSG00000017724	false
18324	TF-TG	ENSMUSG00000022528 (TF-TG) ENSMUSG00000041075	false
19346	TF-TG	ENSMUSG00000034957 (TF-TG) ENSMUSG00000030353	false
28560	TF-TG	ENSMUSG00000019982 (TF-TG) ENSMUSG00000049866	false
29583	TF-TG	ENSMUSG00000030353 (TF-TG) ENSMUSG00000031788	false
18319	TF-TG	ENSMUSG00000022528 (TF-TG) ENSMUSG00000040249	false
26511	TF-TG	ENSMUSG00000036036 (TF-TG) ENSMUSG00000048895	false
10127	TF-TG	ENSMUSG00000024431 (TF-TG) ENSMUSG00000029095	false
18318	TF-TG	ENSMUSG00000022528 (TF-TG) ENSMUSG00000039967	false
18317	TF-TG	ENSMUSG00000022528 (TF-TG) ENSMUSG00000039813	false
13196	TF-TG	ENSMUSG00000020889 (TF-TG) ENSMUSG00000018143	false
28553	TF-TG	ENSMUSG00000019982 (TF-TG) ENSMUSG00000047534	false
15241	TF-TG	ENSMUSG00000018899 (TF-TG) ENSMUSG00000014361	false
29576	TF-TG	ENSMUSG00000030353 (TF-TG) ENSMUSG00000031629	false
13192	TF-TG	ENSMUSG00000020889 (TF-TG) ENSMUSG00000017724	false
18311	TF-TG	ENSMUSG00000022528 (TF-TG) ENSMUSG00000037679	false
28549	TF-TG	ENSMUSG00000019982 (TF-TG) ENSMUSG00000046711	false
10116	TF-TG	ENSMUSG00000024431 (TF-TG) ENSMUSG00000028849	false
18306	TF-TG	ENSMUSG00000022528 (TF-TG) ENSMUSG00000037405	false
28544	TF-TG	ENSMUSG00000019982 (TF-TG) ENSMUSG00000045027	false
15231	TF-TG	ENSMUSG00000018899 (TF-TG) ENSMUSG00000011752	false
18299	TF-TG	ENSMUSG00000022528 (TF-TG) ENSMUSG00000035164	false
15227	TF-TG	ENSMUSG00000018899 (TF-TG) ENSMUSG00000010663	false
18298	TF-TG	ENSMUSG00000022528 (TF-TG) ENSMUSG00000034781	false
11129	TF-TG	ENSMUSG00000024431 (TF-TG) ENSMUSG00000054717	false
28536	TF-TG	ENSMUSG00000019982 (TF-TG) ENSMUSG00000041143	false
29558	TF-TG	ENSMUSG00000030353 (TF-TG) ENSMUSG00000031004	false
4982	TF-TG	ENSMUSG00000015846 (TF-TG) ENSMUSG00000052392	false
20340	TF-TG	ENSMUSG00000034957 (TF-TG) ENSMUSG00000059013	false
26484	TF-TG	ENSMUSG00000036036 (TF-TG) ENSMUSG00000047534	false
19314	TF-TG	ENSMUSG00000034957 (TF-TG) ENSMUSG00000029761	false
29552	TF-TG	ENSMUSG00000030353 (TF-TG) ENSMUSG00000030747	false
28528	TF-TG	ENSMUSG00000019982 (TF-TG) ENSMUSG00000039952	false
13168	TF-TG	ENSMUSG00000020889 (TF-TG) ENSMUSG00000015846	false
14189	TF-TG	ENSMUSG00000020889 (TF-TG) ENSMUSG00000036036	false
11117	TF-TG	ENSMUSG00000024431 (TF-TG) ENSMUSG00000054342	false
18284	TF-TG	ENSMUSG00000022528 (TF-TG) ENSMUSG00000031987	false
28523	TF-TG	ENSMUSG00000019982 (TF-TG) ENSMUSG00000037679	false
26474	TF-TG	ENSMUSG00000036036 (TF-TG) ENSMUSG00000046711	false
14185	TF-TG	ENSMUSG00000020889 (TF-TG) ENSMUSG00000035900	false
18278	TF-TG	ENSMUSG00000022528 (TF-TG) ENSMUSG00000030747	false
15206	TF-TG	ENSMUSG00000018899 (TF-TG) ENSMUSG00000004709	false
28517	TF-TG	ENSMUSG00000019982 (TF-TG) ENSMUSG00000035900	false
18275	TF-TG	ENSMUSG00000022528 (TF-TG) ENSMUSG00000028849	false
28513	TF-TG	ENSMUSG00000019982 (TF-TG) ENSMUSG00000034781	false
5983	TF-TG	ENSMUSG00000022383 (TF-TG) ENSMUSG00000027326	false
4958	TF-TG	ENSMUSG00000015846 (TF-TG) ENSMUSG00000051335	false
13148	TF-TG	ENSMUSG00000020889 (TF-TG) ENSMUSG00000014361	false
18267	TF-TG	ENSMUSG00000022528 (TF-TG) ENSMUSG00000026494	false
18265	TF-TG	ENSMUSG00000022528 (TF-TG) ENSMUSG00000025969	false
29528	TF-TG	ENSMUSG00000030353 (TF-TG) ENSMUSG00000029761	false
18262	TF-TG	ENSMUSG00000022528 (TF-TG) ENSMUSG00000025903	false
18261	TF-TG	ENSMUSG00000022528 (TF-TG) ENSMUSG00000025584	false
26451	TF-TG	ENSMUSG00000036036 (TF-TG) ENSMUSG00000045027	false
18256	TF-TG	ENSMUSG00000022528 (TF-TG) ENSMUSG00000024556	false
3920	TF-TG	ENSMUSG00000015846 (TF-TG) ENSMUSG00000027326	false
13135	TF-TG	ENSMUSG00000020889 (TF-TG) ENSMUSG00000011752	false
18253	TF-TG	ENSMUSG00000022528 (TF-TG) ENSMUSG00000022543	false
19275	TF-TG	ENSMUSG00000034957 (TF-TG) ENSMUSG00000029167	false
14155	TF-TG	ENSMUSG00000020889 (TF-TG) ENSMUSG00000035164	false
4939	TF-TG	ENSMUSG00000015846 (TF-TG) ENSMUSG00000050395	false
28490	TF-TG	ENSMUSG00000019982 (TF-TG) ENSMUSG00000031629	false
18250	TF-TG	ENSMUSG00000022528 (TF-TG) ENSMUSG00000022265	false
15176	TF-TG	ENSMUSG00000018899 (TF-TG) ENSMUSG00000020184	false
13128	TF-TG	ENSMUSG00000020889 (TF-TG) ENSMUSG00000010663	false
29511	TF-TG	ENSMUSG00000030353 (TF-TG) ENSMUSG00000029167	false
18247	TF-TG	ENSMUSG00000022528 (TF-TG) ENSMUSG00000022105	false
28485	TF-TG	ENSMUSG00000019982 (TF-TG) ENSMUSG00000030747	false
11077	TF-TG	ENSMUSG00000024431 (TF-TG) ENSMUSG00000052392	false
18244	TF-TG	ENSMUSG00000022528 (TF-TG) ENSMUSG00000021725	false
29507	TF-TG	ENSMUSG00000030353 (TF-TG) ENSMUSG00000029095	false
19267	TF-TG	ENSMUSG00000034957 (TF-TG) ENSMUSG00000029095	false
18243	TF-TG	ENSMUSG00000022528 (TF-TG) ENSMUSG00000021701	false
29505	TF-TG	ENSMUSG00000030353 (TF-TG) ENSMUSG00000028849	false
14143	TF-TG	ENSMUSG00000020889 (TF-TG) ENSMUSG00000034781	false
26430	TF-TG	ENSMUSG00000036036 (TF-TG) ENSMUSG00000043419	false
18237	TF-TG	ENSMUSG00000022528 (TF-TG) ENSMUSG00000020897	false
15165	TF-lincRNA	ENSMUSG00000020889 (TF-lincRNA) ENSMUSG00000085024	false
18235	TF-TG	ENSMUSG00000022528 (TF-TG) ENSMUSG00000020889	false
4923	TF-TG	ENSMUSG00000015846 (TF-TG) ENSMUSG00000049866	false
19257	TF-TG	ENSMUSG00000034957 (TF-TG) ENSMUSG00000028849	false
5945	TF-TG	ENSMUSG00000022383 (TF-TG) ENSMUSG00000026494	false
4921	TF-TG	ENSMUSG00000015846 (TF-TG) ENSMUSG00000049807	false
18232	TF-TG	ENSMUSG00000022528 (TF-TG) ENSMUSG00000020387	false
28470	TF-TG	ENSMUSG00000019982 (TF-TG) ENSMUSG00000027326	false
18230	TF-TG	ENSMUSG00000022528 (TF-TG) ENSMUSG00000020334	false
26421	TF-TG	ENSMUSG00000036036 (TF-TG) ENSMUSG00000042842	false
18228	TF-TG	ENSMUSG00000022528 (TF-TG) ENSMUSG00000020184	false
26420	TF-TG	ENSMUSG00000036036 (TF-TG) ENSMUSG00000042816	false
18226	TF-TG	ENSMUSG00000022528 (TF-TG) ENSMUSG00000019982	false
18225	TF-TG	ENSMUSG00000022528 (TF-TG) ENSMUSG00000018899	false
5934	TF-TG	ENSMUSG00000022383 (TF-TG) ENSMUSG00000026278	false
26413	TF-TG	ENSMUSG00000036036 (TF-TG) ENSMUSG00000042500	false
11052	TF-TG	ENSMUSG00000024431 (TF-TG) ENSMUSG00000051335	false
18219	TF-TG	ENSMUSG00000022528 (TF-TG) ENSMUSG00000011752	false
28455	TF-TG	ENSMUSG00000019982 (TF-TG) ENSMUSG00000024590	false
28452	TF-TG	ENSMUSG00000019982 (TF-TG) ENSMUSG00000024431	false
20257	TF-TG	ENSMUSG00000034957 (TF-TG) ENSMUSG00000054717	false
5921	TF-TG	ENSMUSG00000022383 (TF-TG) ENSMUSG00000025969	false
4897	TF-TG	ENSMUSG00000015846 (TF-TG) ENSMUSG00000048895	false
5919	TF-TG	ENSMUSG00000022383 (TF-TG) ENSMUSG00000025903	false
28442	TF-TG	ENSMUSG00000019982 (TF-TG) ENSMUSG00000021725	false
11032	TF-TG	ENSMUSG00000024431 (TF-TG) ENSMUSG00000050395	false
5910	TF-TG	ENSMUSG00000022383 (TF-TG) ENSMUSG00000025584	false
3862	TF-TG	ENSMUSG00000015846 (TF-TG) ENSMUSG00000026494	false
20245	TF-TG	ENSMUSG00000034957 (TF-TG) ENSMUSG00000054342	false
29459	TF-TG	ENSMUSG00000030353 (TF-TG) ENSMUSG00000027326	false
5907	TF-TG	ENSMUSG00000022383 (TF-TG) ENSMUSG00000025545	false
9998	TF-TG	ENSMUSG00000024431 (TF-TG) ENSMUSG00000027326	false
14090	TF-TG	ENSMUSG00000020889 (TF-TG) ENSMUSG00000033545	false
15113	TF-TG	ENSMUSG00000020889 (TF-TG) ENSMUSG00000098557	false
13063	TF-TG	ENSMUSG00000020889 (TF-TG) ENSMUSG00000004709	false
11014	TF-TG	ENSMUSG00000024431 (TF-TG) ENSMUSG00000049866	false
11012	TF-TG	ENSMUSG00000024431 (TF-TG) ENSMUSG00000049807	false
3840	TF-TG	ENSMUSG00000015846 (TF-TG) ENSMUSG00000026278	false
29430	TF-TG	ENSMUSG00000030353 (TF-TG) ENSMUSG00000026494	false
26355	TF-TG	ENSMUSG00000036036 (TF-TG) ENSMUSG00000040249	false
4850	TF-TG	ENSMUSG00000015846 (TF-TG) ENSMUSG00000047534	false
29425	TF-TG	ENSMUSG00000030353 (TF-TG) ENSMUSG00000026278	false
6897	TF-lincRNA	ENSMUSG00000022383 (TF-lincRNA) ENSMUSG00000085024	false
20206	TF-TG	ENSMUSG00000034957 (TF-TG) ENSMUSG00000052392	false
26347	TF-TG	ENSMUSG00000036036 (TF-TG) ENSMUSG00000039967	false
10987	TF-TG	ENSMUSG00000024431 (TF-TG) ENSMUSG00000048895	false
3819	TF-TG	ENSMUSG00000015846 (TF-TG) ENSMUSG00000025969	false
29418	TF-TG	ENSMUSG00000030353 (TF-TG) ENSMUSG00000025969	false
26346	TF-TG	ENSMUSG00000036036 (TF-TG) ENSMUSG00000039952	false
3815	TF-TG	ENSMUSG00000015846 (TF-TG) ENSMUSG00000025903	false
29414	TF-TG	ENSMUSG00000030353 (TF-TG) ENSMUSG00000025903	false
26340	TF-TG	ENSMUSG00000036036 (TF-TG) ENSMUSG00000039813	false
4835	TF-TG	ENSMUSG00000015846 (TF-TG) ENSMUSG00000046711	false
29407	TF-TG	ENSMUSG00000030353 (TF-TG) ENSMUSG00000025584	false
29406	TF-TG	ENSMUSG00000030353 (TF-TG) ENSMUSG00000025545	false
5852	TF-TG	ENSMUSG00000022383 (TF-TG) ENSMUSG00000024590	false
5851	TF-TG	ENSMUSG00000022383 (TF-TG) ENSMUSG00000024556	false
20183	TF-TG	ENSMUSG00000034957 (TF-TG) ENSMUSG00000051335	false
3798	TF-TG	ENSMUSG00000015846 (TF-TG) ENSMUSG00000025584	false
6867	TF-TG	ENSMUSG00000022383 (TF-TG) ENSMUSG00000098557	false
3794	TF-TG	ENSMUSG00000015846 (TF-TG) ENSMUSG00000025545	false
9937	TF-TG	ENSMUSG00000024431 (TF-TG) ENSMUSG00000026494	false
5841	TF-TG	ENSMUSG00000022383 (TF-TG) ENSMUSG00000024431	false
29390	TF-TG	ENSMUSG00000030353 (TF-TG) ENSMUSG00000024912	false
19149	TF-TG	ENSMUSG00000034957 (TF-TG) ENSMUSG00000027326	false
20160	TF-TG	ENSMUSG00000034957 (TF-TG) ENSMUSG00000050395	false
29374	TF-TG	ENSMUSG00000030353 (TF-TG) ENSMUSG00000024590	false
29373	TF-TG	ENSMUSG00000030353 (TF-TG) ENSMUSG00000024556	false
9917	TF-TG	ENSMUSG00000024431 (TF-TG) ENSMUSG00000026278	false
5818	TF-TG	ENSMUSG00000022383 (TF-TG) ENSMUSG00000023940	false
10937	TF-TG	ENSMUSG00000024431 (TF-TG) ENSMUSG00000047534	false
4791	TF-TG	ENSMUSG00000015846 (TF-TG) ENSMUSG00000045027	false
20145	TF-TG	ENSMUSG00000034957 (TF-TG) ENSMUSG00000049866	false
14001	TF-TG	ENSMUSG00000020889 (TF-TG) ENSMUSG00000031987	false
20143	TF-TG	ENSMUSG00000034957 (TF-TG) ENSMUSG00000049807	false
26286	TF-TG	ENSMUSG00000036036 (TF-TG) ENSMUSG00000037946	false
9897	TF-TG	ENSMUSG00000024431 (TF-TG) ENSMUSG00000025969	false
5801	TF-TG	ENSMUSG00000022383 (TF-TG) ENSMUSG00000023004	false
10920	TF-TG	ENSMUSG00000024431 (TF-TG) ENSMUSG00000046711	false
29349	TF-TG	ENSMUSG00000030353 (TF-TG) ENSMUSG00000023940	false
9893	TF-TG	ENSMUSG00000024431 (TF-TG) ENSMUSG00000025903	false
26274	TF-TG	ENSMUSG00000036036 (TF-TG) ENSMUSG00000037679	false
29345	TF-TG	ENSMUSG00000030353 (TF-TG) ENSMUSG00000023809	false
28319	TF-lincRNA	ENSMUSG00000018143 (TF-lincRNA) ENSMUSG00000085024	false
13982	TF-TG	ENSMUSG00000020889 (TF-TG) ENSMUSG00000031788	false
3739	TF-TG	ENSMUSG00000015846 (TF-TG) ENSMUSG00000024912	false
20120	TF-TG	ENSMUSG00000034957 (TF-TG) ENSMUSG00000048895	false
15000	TF-TG	ENSMUSG00000020889 (TF-TG) ENSMUSG00000072620	false
29335	TF-TG	ENSMUSG00000030353 (TF-TG) ENSMUSG00000023004	false
26262	TF-TG	ENSMUSG00000036036 (TF-TG) ENSMUSG00000037405	false
9877	TF-TG	ENSMUSG00000024431 (TF-TG) ENSMUSG00000025584	false
13970	TF-TG	ENSMUSG00000020889 (TF-TG) ENSMUSG00000031629	false
9873	TF-TG	ENSMUSG00000024431 (TF-TG) ENSMUSG00000025545	false
6801	TF-TG	ENSMUSG00000022383 (TF-TG) ENSMUSG00000072620	false
19088	TF-TG	ENSMUSG00000034957 (TF-TG) ENSMUSG00000026494	false
4752	TF-TG	ENSMUSG00000015846 (TF-TG) ENSMUSG00000043419	false
5772	TF-TG	ENSMUSG00000022383 (TF-TG) ENSMUSG00000022543	false
28299	TF-TG	ENSMUSG00000018143 (TF-TG) ENSMUSG00000072620	false
5770	TF-TG	ENSMUSG00000022383 (TF-TG) ENSMUSG00000022528	false
4741	TF-TG	ENSMUSG00000015846 (TF-TG) ENSMUSG00000042842	false
29316	TF-TG	ENSMUSG00000030353 (TF-TG) ENSMUSG00000022543	false
4740	TF-TG	ENSMUSG00000015846 (TF-TG) ENSMUSG00000042816	false
29314	TF-TG	ENSMUSG00000030353 (TF-TG) ENSMUSG00000022528	false
5762	TF-TG	ENSMUSG00000022383 (TF-TG) ENSMUSG00000022265	false
3712	TF-TG	ENSMUSG00000015846 (TF-TG) ENSMUSG00000024590	false
28287	TF-TG	ENSMUSG00000018143 (TF-TG) ENSMUSG00000066026	false
3711	TF-TG	ENSMUSG00000015846 (TF-TG) ENSMUSG00000024556	false
26237	TF-TG	ENSMUSG00000036036 (TF-TG) ENSMUSG00000035900	false
19068	TF-TG	ENSMUSG00000034957 (TF-TG) ENSMUSG00000026278	false
10876	TF-TG	ENSMUSG00000024431 (TF-TG) ENSMUSG00000045027	false
29300	TF-TG	ENSMUSG00000030353 (TF-TG) ENSMUSG00000022105	false
5748	TF-TG	ENSMUSG00000022383 (TF-TG) ENSMUSG00000022105	false
4724	TF-TG	ENSMUSG00000015846 (TF-TG) ENSMUSG00000042500	false
13931	TF-TG	ENSMUSG00000020889 (TF-TG) ENSMUSG00000031004	false
29290	TF-TG	ENSMUSG00000030353 (TF-TG) ENSMUSG00000021725	false
29288	TF-TG	ENSMUSG00000030353 (TF-TG) ENSMUSG00000021701	false
20072	TF-TG	ENSMUSG00000034957 (TF-TG) ENSMUSG00000047534	false
26216	TF-TG	ENSMUSG00000036036 (TF-TG) ENSMUSG00000034781	false
19045	TF-TG	ENSMUSG00000034957 (TF-TG) ENSMUSG00000025969	false
6756	TF-TG	ENSMUSG00000022383 (TF-TG) ENSMUSG00000066026	false
5732	TF-TG	ENSMUSG00000022383 (TF-TG) ENSMUSG00000021725	false
6755	TF-TG	ENSMUSG00000022383 (TF-TG) ENSMUSG00000065952	false
13922	TF-TG	ENSMUSG00000020889 (TF-TG) ENSMUSG00000030747	false
5730	TF-TG	ENSMUSG00000022383 (TF-TG) ENSMUSG00000021701	false
19041	TF-TG	ENSMUSG00000034957 (TF-TG) ENSMUSG00000025903	false
28252	TF-TG	ENSMUSG00000018143 (TF-TG) ENSMUSG00000050395	false
29275	TF-TG	ENSMUSG00000030353 (TF-TG) ENSMUSG00000021226	false
9819	TF-TG	ENSMUSG00000024431 (TF-TG) ENSMUSG00000024912	false
20058	TF-TG	ENSMUSG00000034957 (TF-TG) ENSMUSG00000046711	false
28248	TF-TG	ENSMUSG00000018143 (TF-TG) ENSMUSG00000049866	false
5717	TF-TG	ENSMUSG00000022383 (TF-TG) ENSMUSG00000021226	false
10836	TF-TG	ENSMUSG00000024431 (TF-TG) ENSMUSG00000043419	false
13906	TF-TG	ENSMUSG00000020889 (TF-TG) ENSMUSG00000030353	false
19025	TF-TG	ENSMUSG00000034957 (TF-TG) ENSMUSG00000025584	false
14928	TF-TG	ENSMUSG00000020889 (TF-TG) ENSMUSG00000066026	false
14927	TF-TG	ENSMUSG00000020889 (TF-TG) ENSMUSG00000065952	false
29262	TF-TG	ENSMUSG00000030353 (TF-TG) ENSMUSG00000020897	false
19020	TF-TG	ENSMUSG00000034957 (TF-TG) ENSMUSG00000025545	false
3660	TF-TG	ENSMUSG00000015846 (TF-TG) ENSMUSG00000023940	false
29259	TF-TG	ENSMUSG00000030353 (TF-TG) ENSMUSG00000020889	false
10825	TF-TG	ENSMUSG00000024431 (TF-TG) ENSMUSG00000042842	false
10824	TF-TG	ENSMUSG00000024431 (TF-TG) ENSMUSG00000042816	false
5702	TF-TG	ENSMUSG00000022383 (TF-TG) ENSMUSG00000020897	false
26181	TF-TG	ENSMUSG00000036036 (TF-TG) ENSMUSG00000033545	false
3652	TF-TG	ENSMUSG00000015846 (TF-TG) ENSMUSG00000023809	false
5699	TF-TG	ENSMUSG00000022383 (TF-TG) ENSMUSG00000020889	false
4672	TF-TG	ENSMUSG00000015846 (TF-TG) ENSMUSG00000041143	false
9791	TF-TG	ENSMUSG00000024431 (TF-TG) ENSMUSG00000024590	false
9790	TF-TG	ENSMUSG00000024431 (TF-TG) ENSMUSG00000024556	false
28221	TF-TG	ENSMUSG00000018143 (TF-TG) ENSMUSG00000042816	false
4667	TF-TG	ENSMUSG00000015846 (TF-TG) ENSMUSG00000041075	false
10809	TF-TG	ENSMUSG00000024431 (TF-TG) ENSMUSG00000042500	false
29238	TF-TG	ENSMUSG00000030353 (TF-TG) ENSMUSG00000020387	false
13876	TF-TG	ENSMUSG00000020889 (TF-TG) ENSMUSG00000029761	false
29235	TF-TG	ENSMUSG00000030353 (TF-TG) ENSMUSG00000020334	false
20016	TF-TG	ENSMUSG00000034957 (TF-TG) ENSMUSG00000045027	false
5680	TF-TG	ENSMUSG00000022383 (TF-TG) ENSMUSG00000020387	false
5678	TF-TG	ENSMUSG00000022383 (TF-TG) ENSMUSG00000020334	false
29229	TF-TG	ENSMUSG00000030353 (TF-TG) ENSMUSG00000020218	false
3629	TF-TG	ENSMUSG00000015846 (TF-TG) ENSMUSG00000023004	false
28204	TF-TG	ENSMUSG00000018143 (TF-TG) ENSMUSG00000039952	false
29227	TF-TG	ENSMUSG00000030353 (TF-TG) ENSMUSG00000020184	false
6695	TF-TG	ENSMUSG00000022383 (TF-TG) ENSMUSG00000059013	false
5670	TF-TG	ENSMUSG00000022383 (TF-TG) ENSMUSG00000020218	false
5668	TF-TG	ENSMUSG00000022383 (TF-TG) ENSMUSG00000020184	false
5656	TF-TG	ENSMUSG00000022383 (TF-TG) ENSMUSG00000019982	false
18967	TF-TG	ENSMUSG00000034957 (TF-TG) ENSMUSG00000024912	false
29205	TF-TG	ENSMUSG00000030353 (TF-TG) ENSMUSG00000018899	false
4629	TF-TG	ENSMUSG00000015846 (TF-TG) ENSMUSG00000040249	false
28178	TF-TG	ENSMUSG00000018143 (TF-TG) ENSMUSG00000035164	false
29201	TF-TG	ENSMUSG00000030353 (TF-TG) ENSMUSG00000018740	false
29199	TF-TG	ENSMUSG00000030353 (TF-TG) ENSMUSG00000018593	false
13839	TF-TG	ENSMUSG00000020889 (TF-TG) ENSMUSG00000029167	false
26126	TF-TG	ENSMUSG00000036036 (TF-TG) ENSMUSG00000031987	false
19979	TF-TG	ENSMUSG00000034957 (TF-TG) ENSMUSG00000043419	false
29193	TF-TG	ENSMUSG00000030353 (TF-TG) ENSMUSG00000018143	false
4616	TF-TG	ENSMUSG00000015846 (TF-TG) ENSMUSG00000039967	false
13831	TF-TG	ENSMUSG00000020889 (TF-TG) ENSMUSG00000029095	false
10759	TF-TG	ENSMUSG00000024431 (TF-TG) ENSMUSG00000041143	false
3591	TF-TG	ENSMUSG00000015846 (TF-TG) ENSMUSG00000022543	false
9734	TF-TG	ENSMUSG00000024431 (TF-TG) ENSMUSG00000023940	false
4614	TF-TG	ENSMUSG00000015846 (TF-TG) ENSMUSG00000039952	false
29189	TF-TG	ENSMUSG00000030353 (TF-TG) ENSMUSG00000017724	false
5637	TF-TG	ENSMUSG00000022383 (TF-TG) ENSMUSG00000018899	false
3589	TF-TG	ENSMUSG00000015846 (TF-TG) ENSMUSG00000022528	false
10755	TF-TG	ENSMUSG00000024431 (TF-TG) ENSMUSG00000041075	false
5635	TF-TG	ENSMUSG00000022383 (TF-TG) ENSMUSG00000018740	false
26113	TF-TG	ENSMUSG00000036036 (TF-TG) ENSMUSG00000031788	false
5633	TF-TG	ENSMUSG00000022383 (TF-TG) ENSMUSG00000018593	false
19968	TF-TG	ENSMUSG00000034957 (TF-TG) ENSMUSG00000042842	false
4608	TF-TG	ENSMUSG00000015846 (TF-TG) ENSMUSG00000039813	false
19967	TF-TG	ENSMUSG00000034957 (TF-TG) ENSMUSG00000042816	false
9727	TF-TG	ENSMUSG00000024431 (TF-TG) ENSMUSG00000023809	false
13821	TF-TG	ENSMUSG00000020889 (TF-TG) ENSMUSG00000028849	false
18939	TF-TG	ENSMUSG00000034957 (TF-TG) ENSMUSG00000024590	false
26107	TF-TG	ENSMUSG00000036036 (TF-TG) ENSMUSG00000031629	false
18938	TF-TG	ENSMUSG00000034957 (TF-TG) ENSMUSG00000024556	false
3577	TF-TG	ENSMUSG00000015846 (TF-TG) ENSMUSG00000022265	false
28152	TF-TG	ENSMUSG00000018143 (TF-TG) ENSMUSG00000031629	false
14839	TF-TG	ENSMUSG00000020889 (TF-TG) ENSMUSG00000059013	false
5623	TF-TG	ENSMUSG00000022383 (TF-TG) ENSMUSG00000018143	false
5619	TF-TG	ENSMUSG00000022383 (TF-TG) ENSMUSG00000017724	false
28146	TF-TG	ENSMUSG00000018143 (TF-TG) ENSMUSG00000031004	false
19952	TF-TG	ENSMUSG00000034957 (TF-TG) ENSMUSG00000042500	false
29166	TF-TG	ENSMUSG00000030353 (TF-TG) ENSMUSG00000014361	false
6638	TF-TG	ENSMUSG00000022383 (TF-TG) ENSMUSG00000054717	false
18925	TF-TG	ENSMUSG00000034957 (TF-TG) ENSMUSG00000024431	false
15851	TF-TG	ENSMUSG00000022105 (TF-TG) ENSMUSG00000024912	false
9705	TF-TG	ENSMUSG00000024431 (TF-TG) ENSMUSG00000023004	false
26088	TF-TG	ENSMUSG00000036036 (TF-TG) ENSMUSG00000031004	false
3560	TF-TG	ENSMUSG00000015846 (TF-TG) ENSMUSG00000022105	false
29159	TF-TG	ENSMUSG00000030353 (TF-TG) ENSMUSG00000011752	false
6629	TF-TG	ENSMUSG00000022383 (TF-TG) ENSMUSG00000054342	false
29156	TF-TG	ENSMUSG00000030353 (TF-TG) ENSMUSG00000010663	false
15843	TF-lincRNA	ENSMUSG00000018899 (TF-lincRNA) ENSMUSG00000085024	false
28130	TF-TG	ENSMUSG00000018143 (TF-TG) ENSMUSG00000029095	false
26081	TF-TG	ENSMUSG00000036036 (TF-TG) ENSMUSG00000030747	false
10717	TF-TG	ENSMUSG00000024431 (TF-TG) ENSMUSG00000040249	false
26076	TF-TG	ENSMUSG00000036036 (TF-TG) ENSMUSG00000030353	false
5596	TF-TG	ENSMUSG00000022383 (TF-TG) ENSMUSG00000014361	false
5591	TF-TG	ENSMUSG00000022383 (TF-TG) ENSMUSG00000011752	false
30164	TF-lincRNA	ENSMUSG00000030353 (TF-lincRNA) ENSMUSG00000085024	false
5586	TF-TG	ENSMUSG00000022383 (TF-TG) ENSMUSG00000010663	false
28113	TF-TG	ENSMUSG00000018143 (TF-TG) ENSMUSG00000027326	false
15825	TF-TG	ENSMUSG00000018899 (TF-TG) ENSMUSG00000098557	false
10704	TF-TG	ENSMUSG00000024431 (TF-TG) ENSMUSG00000039967	false
10702	TF-TG	ENSMUSG00000024431 (TF-TG) ENSMUSG00000039952	false
3533	TF-TG	ENSMUSG00000015846 (TF-TG) ENSMUSG00000021725	false
3532	TF-TG	ENSMUSG00000015846 (TF-TG) ENSMUSG00000021701	false
6603	TF-TG	ENSMUSG00000022383 (TF-TG) ENSMUSG00000052392	false
29129	TF-TG	ENSMUSG00000030353 (TF-TG) ENSMUSG00000004709	false
26057	TF-TG	ENSMUSG00000036036 (TF-TG) ENSMUSG00000029761	false
10696	TF-TG	ENSMUSG00000024431 (TF-TG) ENSMUSG00000039813	false
18884	TF-TG	ENSMUSG00000034957 (TF-TG) ENSMUSG00000023940	false
30146	TF-TG	ENSMUSG00000030353 (TF-TG) ENSMUSG00000098557	false
9666	TF-TG	ENSMUSG00000024431 (TF-TG) ENSMUSG00000022543	false
9664	TF-TG	ENSMUSG00000024431 (TF-TG) ENSMUSG00000022528	false
6591	TF-TG	ENSMUSG00000022383 (TF-TG) ENSMUSG00000051335	false
18876	TF-TG	ENSMUSG00000034957 (TF-TG) ENSMUSG00000023809	false
19899	TF-TG	ENSMUSG00000034957 (TF-TG) ENSMUSG00000041143	false
19894	TF-TG	ENSMUSG00000034957 (TF-TG) ENSMUSG00000041075	false
9654	TF-TG	ENSMUSG00000024431 (TF-TG) ENSMUSG00000022383	false
3510	TF-TG	ENSMUSG00000015846 (TF-TG) ENSMUSG00000021226	false
26036	TF-TG	ENSMUSG00000036036 (TF-TG) ENSMUSG00000029167	false
15796	TF-TG	ENSMUSG00000018899 (TF-TG) ENSMUSG00000072620	false
9650	TF-TG	ENSMUSG00000024431 (TF-TG) ENSMUSG00000022265	false
26030	TF-TG	ENSMUSG00000036036 (TF-TG) ENSMUSG00000029095	false
6573	TF-TG	ENSMUSG00000022383 (TF-TG) ENSMUSG00000049866	false
28075	TF-TG	ENSMUSG00000018143 (TF-TG) ENSMUSG00000022528	false
6571	TF-TG	ENSMUSG00000022383 (TF-TG) ENSMUSG00000049807	false
14761	TF-TG	ENSMUSG00000020889 (TF-TG) ENSMUSG00000054717	false
18856	TF-TG	ENSMUSG00000034957 (TF-TG) ENSMUSG00000023004	false
26023	TF-TG	ENSMUSG00000036036 (TF-TG) ENSMUSG00000028849	false
5541	TF-TG	ENSMUSG00000022383 (TF-TG) ENSMUSG00000004709	false
15780	TF-TG	ENSMUSG00000018899 (TF-TG) ENSMUSG00000066026	false
15779	TF-TG	ENSMUSG00000018899 (TF-TG) ENSMUSG00000065952	false
28066	TF-TG	ENSMUSG00000018143 (TF-TG) ENSMUSG00000021725	false
9633	TF-TG	ENSMUSG00000024431 (TF-TG) ENSMUSG00000022105	false
14752	TF-TG	ENSMUSG00000020889 (TF-TG) ENSMUSG00000054342	false
3488	TF-TG	ENSMUSG00000015846 (TF-TG) ENSMUSG00000020897	false
4511	TF-TG	ENSMUSG00000015846 (TF-TG) ENSMUSG00000037946	false
3485	TF-TG	ENSMUSG00000015846 (TF-TG) ENSMUSG00000020889	false
28060	TF-TG	ENSMUSG00000018143 (TF-TG) ENSMUSG00000021226	false
6556	TF-TG	ENSMUSG00000022383 (TF-TG) ENSMUSG00000048895	false
28057	TF-TG	ENSMUSG00000018143 (TF-TG) ENSMUSG00000020897	false
13720	TF-TG	ENSMUSG00000020889 (TF-TG) ENSMUSG00000027326	false
28055	TF-TG	ENSMUSG00000018143 (TF-TG) ENSMUSG00000020889	false
4497	TF-TG	ENSMUSG00000015846 (TF-TG) ENSMUSG00000037679	false
19855	TF-TG	ENSMUSG00000034957 (TF-TG) ENSMUSG00000040249	false
28047	TF-TG	ENSMUSG00000018143 (TF-TG) ENSMUSG00000020334	false
30093	TF-TG	ENSMUSG00000030353 (TF-TG) ENSMUSG00000072620	false
28045	TF-TG	ENSMUSG00000018143 (TF-TG) ENSMUSG00000020218	false
15757	TF-TG	ENSMUSG00000018899 (TF-TG) ENSMUSG00000059013	false
28044	TF-TG	ENSMUSG00000018143 (TF-TG) ENSMUSG00000020184	false
9605	TF-TG	ENSMUSG00000024431 (TF-TG) ENSMUSG00000021725	false
6533	TF-TG	ENSMUSG00000022383 (TF-TG) ENSMUSG00000047534	false
28036	TF-TG	ENSMUSG00000018143 (TF-TG) ENSMUSG00000018899	false
18819	TF-TG	ENSMUSG00000034957 (TF-TG) ENSMUSG00000022543	false
9603	TF-TG	ENSMUSG00000024431 (TF-TG) ENSMUSG00000021701	false
19842	TF-TG	ENSMUSG00000034957 (TF-TG) ENSMUSG00000039967	false
18817	TF-TG	ENSMUSG00000034957 (TF-TG) ENSMUSG00000022528	false
19840	TF-TG	ENSMUSG00000034957 (TF-TG) ENSMUSG00000039952	false
6526	TF-TG	ENSMUSG00000022383 (TF-TG) ENSMUSG00000046711	false
4478	TF-TG	ENSMUSG00000015846 (TF-TG) ENSMUSG00000037405	false
19834	TF-TG	ENSMUSG00000034957 (TF-TG) ENSMUSG00000039813	false
14713	TF-TG	ENSMUSG00000020889 (TF-TG) ENSMUSG00000052392	false
18808	TF-TG	ENSMUSG00000034957 (TF-TG) ENSMUSG00000022383	false
15736	TF-TG	ENSMUSG00000018899 (TF-TG) ENSMUSG00000054717	false
5493	TF-TG	ENSMUSG00000022383 (TF-TG) ENSMUSG00000015846	false
3445	TF-TG	ENSMUSG00000015846 (TF-TG) ENSMUSG00000020387	false
18804	TF-TG	ENSMUSG00000034957 (TF-TG) ENSMUSG00000022265	false
15732	TF-TG	ENSMUSG00000018899 (TF-TG) ENSMUSG00000054342	false
30067	TF-TG	ENSMUSG00000030353 (TF-TG) ENSMUSG00000066026	false
28019	TF-TG	ENSMUSG00000018143 (TF-TG) ENSMUSG00000010663	false
30066	TF-TG	ENSMUSG00000030353 (TF-TG) ENSMUSG00000065952	false
3441	TF-TG	ENSMUSG00000015846 (TF-TG) ENSMUSG00000020334	false
10606	TF-TG	ENSMUSG00000024431 (TF-TG) ENSMUSG00000037946	false
25964	TF-TG	ENSMUSG00000036036 (TF-TG) ENSMUSG00000027326	false
9579	TF-TG	ENSMUSG00000024431 (TF-TG) ENSMUSG00000021226	false
3433	TF-TG	ENSMUSG00000015846 (TF-TG) ENSMUSG00000020218	false
15719	TF-TG	ENSMUSG00000018899 (TF-TG) ENSMUSG00000052392	false
3431	TF-TG	ENSMUSG00000015846 (TF-TG) ENSMUSG00000020184	false
15714	TF-TG	ENSMUSG00000018899 (TF-TG) ENSMUSG00000051335	false
13665	TF-TG	ENSMUSG00000020889 (TF-TG) ENSMUSG00000026494	false
14689	TF-TG	ENSMUSG00000020889 (TF-TG) ENSMUSG00000051335	false
17760	TF-TG	ENSMUSG00000024912 (TF-TG) ENSMUSG00000059013	false
10592	TF-TG	ENSMUSG00000024431 (TF-TG) ENSMUSG00000037679	false
15711	TF-TG	ENSMUSG00000018899 (TF-TG) ENSMUSG00000050395	false
17754	TF-TG	ENSMUSG00000024912 (TF-TG) ENSMUSG00000054342	false
3417	TF-TG	ENSMUSG00000015846 (TF-TG) ENSMUSG00000019982	false
15702	TF-TG	ENSMUSG00000018899 (TF-TG) ENSMUSG00000049866	false
9557	TF-TG	ENSMUSG00000024431 (TF-TG) ENSMUSG00000020897	false
15700	TF-TG	ENSMUSG00000018899 (TF-TG) ENSMUSG00000049807	false
17747	TF-TG	ENSMUSG00000024912 (TF-TG) ENSMUSG00000050395	false
5459	TF-lincRNA	ENSMUSG00000015846 (TF-lincRNA) ENSMUSG00000085024	false
9554	TF-TG	ENSMUSG00000024431 (TF-TG) ENSMUSG00000020889	false
17744	TF-TG	ENSMUSG00000024912 (TF-TG) ENSMUSG00000049866	false
14671	TF-TG	ENSMUSG00000020889 (TF-TG) ENSMUSG00000050395	false
10575	TF-TG	ENSMUSG00000024431 (TF-TG) ENSMUSG00000037405	false
6479	TF-TG	ENSMUSG00000022383 (TF-TG) ENSMUSG00000042816	false
15694	TF-TG	ENSMUSG00000018899 (TF-TG) ENSMUSG00000048895	false
13646	TF-TG	ENSMUSG00000020889 (TF-TG) ENSMUSG00000026278	false
25933	TF-TG	ENSMUSG00000036036 (TF-TG) ENSMUSG00000026494	false
12617	TF-TG	ENSMUSG00000029167 (TF-TG) ENSMUSG00000022383	false
6473	TF-TG	ENSMUSG00000022383 (TF-TG) ENSMUSG00000042500	false
4425	TF-TG	ENSMUSG00000015846 (TF-TG) ENSMUSG00000036036	false
18760	TF-TG	ENSMUSG00000034957 (TF-TG) ENSMUSG00000021725	false
18758	TF-TG	ENSMUSG00000034957 (TF-TG) ENSMUSG00000021701	false
30021	TF-TG	ENSMUSG00000030353 (TF-TG) ENSMUSG00000059013	false
4419	TF-TG	ENSMUSG00000015846 (TF-TG) ENSMUSG00000035900	false
