# Supplementary material for: Regulatory network analysis of Paneth cell and goblet cell enriched gut organoids using transcriptomics approaches
Source: Royal Society of Chemistry journal article supplement (doi:10.1039/c9mo00130a), 2019-12-10
Supplement: c9mo00130a1.cys [file c9mo00130a1.cys › CytoscapeSession-2019_09_26-22_01/tables/40195-1%3A+Cluster+1+%28Score%3A+17.048%29/LOCAL_ATTRS-org.cytoscape.model.CyNode-1%3A+Cluster+1+%28Score%3A+17.048%29+default+node.cytable]

CyCSV-Version	1
SUID	name	selected
java.lang.Long	java.lang.String	java.lang.Boolean
1: Cluster 1 (Score: 17.048) default node
288	ENSMUSG00000022543	false
1181	ENSMUSG00000004709	false
284	ENSMUSG00000022265	false
408	ENSMUSG00000027326	false
915	ENSMUSG00000066026	false
914	ENSMUSG00000065952	false
1681	ENSMUSG00000030353	false
778	ENSMUSG00000047534	false
265	ENSMUSG00000021725	false
264	ENSMUSG00000021701	false
1799	ENSMUSG00000033545	false
516	ENSMUSG00000031788	false
771	ENSMUSG00000046711	false
1281	ENSMUSG00000020218	false
641	ENSMUSG00000037946	false
512	ENSMUSG00000031629	false
1662	ENSMUSG00000029761	false
382	ENSMUSG00000026278	false
1530	ENSMUSG00000026494	false
634	ENSMUSG00000037679	false
1272	ENSMUSG00000019982	false
248	ENSMUSG00000020897	false
375	ENSMUSG00000025969	false
367	ENSMUSG00000025584	false
878	ENSMUSG00000059013	false
622	ENSMUSG00000037405	false
494	ENSMUSG00000031004	false
750	ENSMUSG00000045027	false
365	ENSMUSG00000025545	false
490	ENSMUSG00000030747	false
105	ENSMUSG00000040249	false
232	ENSMUSG00000020387	false
102	ENSMUSG00000034957	false
2022	ENSMUSG00000042842	false
2021	ENSMUSG00000042816	false
101	ENSMUSG00000022528	false
229	ENSMUSG00000020334	false
2148	ENSMUSG00000051335	false
736	ENSMUSG00000043419	false
94	ENSMUSG00000024912	false
1244	ENSMUSG00000018143	false
1500	ENSMUSG00000025903	false
603	ENSMUSG00000036036	false
2011	ENSMUSG00000042500	false
2137	ENSMUSG00000050395	false
601	ENSMUSG00000035900	false
89	ENSMUSG00000022105	false
87	ENSMUSG00000020184	false
86	ENSMUSG00000018899	false
85	ENSMUSG00000020889	false
1109	ENSMUSG00000072620	false
980	ENSMUSG00000098557	false
82	ENSMUSG00000029167	false
1744	ENSMUSG00000031987	false
336	ENSMUSG00000024590	false
79	ENSMUSG00000024431	false
847	ENSMUSG00000054717	false
335	ENSMUSG00000024556	false
2126	ENSMUSG00000049807	false
206	ENSMUSG00000018740	false
205	ENSMUSG00000018593	false
76	ENSMUSG00000022383	false
1100	ENSMUSG00000048895	false
844	ENSMUSG00000054342	false
588	ENSMUSG00000035164	false
459	ENSMUSG00000029095	false
74	ENSMUSG00000015846	false
200	ENSMUSG00000017724	false
583	ENSMUSG00000034781	false
454	ENSMUSG00000028849	false
704	ENSMUSG00000041143	false
318	ENSMUSG00000023940	false
1212	ENSMUSG00000010663	false
700	ENSMUSG00000041075	false
826	ENSMUSG00000052392	false
314	ENSMUSG00000023809	false
177	ENSMUSG00000014361	false
303	ENSMUSG00000023004	false
2730	ENSMUSG00000085024	false
170	ENSMUSG00000011752	false
1321	ENSMUSG00000021226	false
1957	ENSMUSG00000039967	false
805	ENSMUSG00000049866	false
1956	ENSMUSG00000039952	false
676	ENSMUSG00000039813	false
