# Supplementary material for: Regulatory network analysis of Paneth cell and goblet cell enriched gut organoids using transcriptomics approaches
Source: Royal Society of Chemistry journal article supplement (doi:10.1039/c9mo00130a), 2019-12-10
Supplement: c9mo00130a1.cys [file c9mo00130a1.cys › CytoscapeSession-2019_09_26-22_01/tables/40205-1%3A+Cluster+2+%28Score%3A+7.03%29/LOCAL_ATTRS-org.cytoscape.model.CyEdge-1%3A+Cluster+2+%28Score%3A+7.03%29+default+edge.cytable]

CyCSV-Version	1
SUID	interaction	name	selected
java.lang.Long	java.lang.String	java.lang.String	java.lang.Boolean
1: Cluster 2 (Score: 7.03) default edge
26942	TF-TG	ENSMUSG00000037169 (TF-TG) ENSMUSG00000032380	false
26940	TF-TG	ENSMUSG00000037169 (TF-TG) ENSMUSG00000032245	false
26938	TF-TG	ENSMUSG00000037169 (TF-TG) ENSMUSG00000032026	false
26937	TF-TG	ENSMUSG00000037169 (TF-TG) ENSMUSG00000032018	false
26931	TF-TG	ENSMUSG00000037169 (TF-TG) ENSMUSG00000030287	false
26930	TF-TG	ENSMUSG00000037169 (TF-TG) ENSMUSG00000030246	false
26927	TF-TG	ENSMUSG00000037169 (TF-TG) ENSMUSG00000029814	false
26926	TF-TG	ENSMUSG00000037169 (TF-TG) ENSMUSG00000029560	false
26925	TF-TG	ENSMUSG00000037169 (TF-TG) ENSMUSG00000029330	false
26921	TF-TG	ENSMUSG00000037169 (TF-TG) ENSMUSG00000028649	false
26920	TF-TG	ENSMUSG00000037169 (TF-TG) ENSMUSG00000028602	false
26919	TF-TG	ENSMUSG00000037169 (TF-TG) ENSMUSG00000028341	false
26918	TF-TG	ENSMUSG00000037169 (TF-TG) ENSMUSG00000028211	false
26914	TF-TG	ENSMUSG00000037169 (TF-TG) ENSMUSG00000027313	false
26913	TF-TG	ENSMUSG00000037169 (TF-TG) ENSMUSG00000026820	false
26911	TF-TG	ENSMUSG00000037169 (TF-TG) ENSMUSG00000026782	false
26910	TF-TG	ENSMUSG00000037169 (TF-TG) ENSMUSG00000026649	false
26908	TF-TG	ENSMUSG00000037169 (TF-TG) ENSMUSG00000026107	false
26907	TF-TG	ENSMUSG00000037169 (TF-TG) ENSMUSG00000026103	false
26906	TF-TG	ENSMUSG00000037169 (TF-TG) ENSMUSG00000025921	false
26901	TF-TG	ENSMUSG00000037169 (TF-TG) ENSMUSG00000024743	false
26900	TF-TG	ENSMUSG00000037169 (TF-TG) ENSMUSG00000024665	false
26899	TF-TG	ENSMUSG00000037169 (TF-TG) ENSMUSG00000024601	false
26895	TF-TG	ENSMUSG00000037169 (TF-TG) ENSMUSG00000024525	false
26894	TF-TG	ENSMUSG00000037169 (TF-TG) ENSMUSG00000024378	false
26892	TF-TG	ENSMUSG00000037169 (TF-TG) ENSMUSG00000024193	false
26889	TF-TG	ENSMUSG00000037169 (TF-TG) ENSMUSG00000024074	false
26887	TF-TG	ENSMUSG00000037169 (TF-TG) ENSMUSG00000024033	false
26886	TF-TG	ENSMUSG00000037169 (TF-TG) ENSMUSG00000024030	false
26882	TF-TG	ENSMUSG00000037169 (TF-TG) ENSMUSG00000023017	false
26881	TF-TG	ENSMUSG00000037169 (TF-TG) ENSMUSG00000023008	false
26879	TF-TG	ENSMUSG00000037169 (TF-TG) ENSMUSG00000022995	false
26874	TF-TG	ENSMUSG00000037169 (TF-TG) ENSMUSG00000022253	false
26872	TF-TG	ENSMUSG00000037169 (TF-TG) ENSMUSG00000022094	false
26871	TF-TG	ENSMUSG00000037169 (TF-TG) ENSMUSG00000021876	false
26870	TF-TG	ENSMUSG00000037169 (TF-TG) ENSMUSG00000021831	false
26866	TF-TG	ENSMUSG00000037169 (TF-TG) ENSMUSG00000021196	false
26863	TF-TG	ENSMUSG00000037169 (TF-TG) ENSMUSG00000020872	false
26862	TF-TG	ENSMUSG00000037169 (TF-TG) ENSMUSG00000020838	false
26860	TF-TG	ENSMUSG00000037169 (TF-TG) ENSMUSG00000020471	false
26858	TF-TG	ENSMUSG00000037169 (TF-TG) ENSMUSG00000020402	false
26856	TF-TG	ENSMUSG00000037169 (TF-TG) ENSMUSG00000020376	false
26851	TF-TG	ENSMUSG00000037169 (TF-TG) ENSMUSG00000020015	false
26850	TF-TG	ENSMUSG00000037169 (TF-TG) ENSMUSG00000019986	false
26849	TF-TG	ENSMUSG00000037169 (TF-TG) ENSMUSG00000019916	false
26848	TF-TG	ENSMUSG00000037169 (TF-TG) ENSMUSG00000019796	false
26846	TF-TG	ENSMUSG00000037169 (TF-TG) ENSMUSG00000019564	false
26845	TF-TG	ENSMUSG00000037169 (TF-TG) ENSMUSG00000018411	false
26842	TF-TG	ENSMUSG00000037169 (TF-TG) ENSMUSG00000017716	false
26840	TF-TG	ENSMUSG00000037169 (TF-TG) ENSMUSG00000015745	false
26839	TF-TG	ENSMUSG00000037169 (TF-TG) ENSMUSG00000013089	false
26836	TF-TG	ENSMUSG00000037169 (TF-TG) ENSMUSG00000010021	false
26835	TF-TG	ENSMUSG00000037169 (TF-TG) ENSMUSG00000009739	false
26834	TF-TG	ENSMUSG00000037169 (TF-TG) ENSMUSG00000006731	false
26823	TF-TG	ENSMUSG00000037169 (TF-TG) ENSMUSG00000000126	false
26822	TF-TG	ENSMUSG00000037169 (TF-TG) ENSMUSG00000000056	false
18209	TF-lincRNA	ENSMUSG00000035158 (TF-lincRNA) ENSMUSG00000097287	false
18208	TF-lincRNA	ENSMUSG00000035158 (TF-lincRNA) ENSMUSG00000097561	false
18207	TF-lincRNA	ENSMUSG00000035158 (TF-lincRNA) ENSMUSG00000085183	false
18204	TF-TG	ENSMUSG00000035158 (TF-TG) ENSMUSG00000098715	false
18201	TF-TG	ENSMUSG00000035158 (TF-TG) ENSMUSG00000081769	false
18200	TF-TG	ENSMUSG00000035158 (TF-TG) ENSMUSG00000079037	false
18199	TF-TG	ENSMUSG00000035158 (TF-TG) ENSMUSG00000078566	false
18197	TF-TG	ENSMUSG00000035158 (TF-TG) ENSMUSG00000074715	false
18196	TF-TG	ENSMUSG00000035158 (TF-TG) ENSMUSG00000074218	false
18194	TF-TG	ENSMUSG00000035158 (TF-TG) ENSMUSG00000072115	false
18192	TF-TG	ENSMUSG00000035158 (TF-TG) ENSMUSG00000069622	false
18188	TF-TG	ENSMUSG00000035158 (TF-TG) ENSMUSG00000064262	false
18187	TF-TG	ENSMUSG00000035158 (TF-TG) ENSMUSG00000064215	false
18186	TF-TG	ENSMUSG00000035158 (TF-TG) ENSMUSG00000063568	false
18185	TF-TG	ENSMUSG00000035158 (TF-TG) ENSMUSG00000063439	false
18184	TF-TG	ENSMUSG00000035158 (TF-TG) ENSMUSG00000063229	false
18183	TF-TG	ENSMUSG00000035158 (TF-TG) ENSMUSG00000062248	false
18182	TF-TG	ENSMUSG00000035158 (TF-TG) ENSMUSG00000062078	false
18181	TF-TG	ENSMUSG00000035158 (TF-TG) ENSMUSG00000061414	false
18178	TF-TG	ENSMUSG00000035158 (TF-TG) ENSMUSG00000059824	false
18176	TF-TG	ENSMUSG00000035158 (TF-TG) ENSMUSG00000058794	false
18174	TF-TG	ENSMUSG00000035158 (TF-TG) ENSMUSG00000058145	false
18169	TF-TG	ENSMUSG00000035158 (TF-TG) ENSMUSG00000056888	false
18165	TF-TG	ENSMUSG00000035158 (TF-TG) ENSMUSG00000056069	false
18164	TF-TG	ENSMUSG00000035158 (TF-TG) ENSMUSG00000055493	false
18163	TF-TG	ENSMUSG00000035158 (TF-TG) ENSMUSG00000054920	false
18162	TF-TG	ENSMUSG00000035158 (TF-TG) ENSMUSG00000054422	false
18160	TF-TG	ENSMUSG00000035158 (TF-TG) ENSMUSG00000054150	false
18159	TF-TG	ENSMUSG00000035158 (TF-TG) ENSMUSG00000053604	false
18158	TF-TG	ENSMUSG00000035158 (TF-TG) ENSMUSG00000053580	false
18151	TF-TG	ENSMUSG00000035158 (TF-TG) ENSMUSG00000049878	false
18149	TF-TG	ENSMUSG00000035158 (TF-TG) ENSMUSG00000048473	false
18148	TF-TG	ENSMUSG00000035158 (TF-TG) ENSMUSG00000048376	false
18147	TF-TG	ENSMUSG00000035158 (TF-TG) ENSMUSG00000048058	false
18142	TF-TG	ENSMUSG00000035158 (TF-TG) ENSMUSG00000046814	false
18140	TF-TG	ENSMUSG00000035158 (TF-TG) ENSMUSG00000046058	false
18137	TF-TG	ENSMUSG00000035158 (TF-TG) ENSMUSG00000043004	false
18135	TF-TG	ENSMUSG00000035158 (TF-TG) ENSMUSG00000042096	false
18134	TF-TG	ENSMUSG00000035158 (TF-TG) ENSMUSG00000041930	false
18127	TF-TG	ENSMUSG00000035158 (TF-TG) ENSMUSG00000041058	false
18126	TF-TG	ENSMUSG00000035158 (TF-TG) ENSMUSG00000041040	false
18125	TF-TG	ENSMUSG00000035158 (TF-TG) ENSMUSG00000040447	false
18124	TF-TG	ENSMUSG00000035158 (TF-TG) ENSMUSG00000040345	false
18123	TF-TG	ENSMUSG00000035158 (TF-TG) ENSMUSG00000040280	false
18122	TF-TG	ENSMUSG00000035158 (TF-TG) ENSMUSG00000040084	false
18118	TF-TG	ENSMUSG00000035158 (TF-TG) ENSMUSG00000039158	false
18117	TF-TG	ENSMUSG00000035158 (TF-TG) ENSMUSG00000039050	false
18115	TF-TG	ENSMUSG00000035158 (TF-TG) ENSMUSG00000038843	false
18114	TF-TG	ENSMUSG00000035158 (TF-TG) ENSMUSG00000038451	false
18112	TF-TG	ENSMUSG00000035158 (TF-TG) ENSMUSG00000038175	false
18109	TF-TG	ENSMUSG00000035158 (TF-TG) ENSMUSG00000037315	false
18108	TF-TG	ENSMUSG00000035158 (TF-TG) ENSMUSG00000037235	false
18107	TF-TG	ENSMUSG00000035158 (TF-TG) ENSMUSG00000035711	false
18106	TF-TG	ENSMUSG00000035158 (TF-TG) ENSMUSG00000035441	false
18105	TF-TG	ENSMUSG00000035158 (TF-TG) ENSMUSG00000035239	false
18100	TF-TG	ENSMUSG00000035158 (TF-TG) ENSMUSG00000034413	false
18099	TF-TG	ENSMUSG00000035158 (TF-TG) ENSMUSG00000034116	false
18096	TF-TG	ENSMUSG00000035158 (TF-TG) ENSMUSG00000033530	false
18094	TF-TG	ENSMUSG00000035158 (TF-TG) ENSMUSG00000033161	false
18093	TF-TG	ENSMUSG00000035158 (TF-TG) ENSMUSG00000033107	false
18092	TF-TG	ENSMUSG00000035158 (TF-TG) ENSMUSG00000033105	false
18091	TF-TG	ENSMUSG00000035158 (TF-TG) ENSMUSG00000032783	false
18090	TF-TG	ENSMUSG00000035158 (TF-TG) ENSMUSG00000032754	false
18089	TF-TG	ENSMUSG00000035158 (TF-TG) ENSMUSG00000032740	false
18087	TF-TG	ENSMUSG00000035158 (TF-TG) ENSMUSG00000032431	false
18085	TF-TG	ENSMUSG00000035158 (TF-TG) ENSMUSG00000032245	false
18083	TF-TG	ENSMUSG00000035158 (TF-TG) ENSMUSG00000032018	false
18082	TF-TG	ENSMUSG00000035158 (TF-TG) ENSMUSG00000031903	false
18076	TF-TG	ENSMUSG00000035158 (TF-TG) ENSMUSG00000031367	false
18074	TF-TG	ENSMUSG00000035158 (TF-TG) ENSMUSG00000030772	false
18073	TF-TG	ENSMUSG00000035158 (TF-TG) ENSMUSG00000030762	false
18072	TF-TG	ENSMUSG00000035158 (TF-TG) ENSMUSG00000030528	false
18068	TF-TG	ENSMUSG00000035158 (TF-TG) ENSMUSG00000029772	false
18066	TF-TG	ENSMUSG00000035158 (TF-TG) ENSMUSG00000029560	false
18065	TF-TG	ENSMUSG00000035158 (TF-TG) ENSMUSG00000029470	false
18063	TF-TG	ENSMUSG00000035158 (TF-TG) ENSMUSG00000029177	false
18061	TF-TG	ENSMUSG00000035158 (TF-TG) ENSMUSG00000028943	false
18057	TF-TG	ENSMUSG00000035158 (TF-TG) ENSMUSG00000028614	false
18056	TF-TG	ENSMUSG00000035158 (TF-TG) ENSMUSG00000028576	false
18055	TF-TG	ENSMUSG00000035158 (TF-TG) ENSMUSG00000028555	false
18054	TF-TG	ENSMUSG00000035158 (TF-TG) ENSMUSG00000028542	false
18053	TF-TG	ENSMUSG00000035158 (TF-TG) ENSMUSG00000028341	false
18051	TF-TG	ENSMUSG00000035158 (TF-TG) ENSMUSG00000028211	false
18049	TF-TG	ENSMUSG00000035158 (TF-TG) ENSMUSG00000027883	false
18046	TF-TG	ENSMUSG00000035158 (TF-TG) ENSMUSG00000027435	false
18044	TF-TG	ENSMUSG00000035158 (TF-TG) ENSMUSG00000026921	false
18043	TF-TG	ENSMUSG00000035158 (TF-TG) ENSMUSG00000026879	false
18042	TF-TG	ENSMUSG00000035158 (TF-TG) ENSMUSG00000026820	false
18040	TF-TG	ENSMUSG00000035158 (TF-TG) ENSMUSG00000026223	false
18039	TF-TG	ENSMUSG00000035158 (TF-TG) ENSMUSG00000026107	false
18038	TF-TG	ENSMUSG00000035158 (TF-TG) ENSMUSG00000025780	false
18037	TF-TG	ENSMUSG00000035158 (TF-TG) ENSMUSG00000025608	false
18035	TF-TG	ENSMUSG00000035158 (TF-TG) ENSMUSG00000025203	false
18034	TF-TG	ENSMUSG00000035158 (TF-TG) ENSMUSG00000025176	false
18033	TF-TG	ENSMUSG00000035158 (TF-TG) ENSMUSG00000025161	false
18031	TF-TG	ENSMUSG00000035158 (TF-TG) ENSMUSG00000024665	false
18027	TF-TG	ENSMUSG00000035158 (TF-TG) ENSMUSG00000024378	false
18024	TF-TG	ENSMUSG00000035158 (TF-TG) ENSMUSG00000022864	false
18022	TF-TG	ENSMUSG00000035158 (TF-TG) ENSMUSG00000022555	false
18019	TF-TG	ENSMUSG00000035158 (TF-TG) ENSMUSG00000022364	false
38498	miRNA-mRNA	mmu-miR-125b-5p (miRNA-mRNA) ENSMUSG00000062078	false
18017	TF-TG	ENSMUSG00000035158 (TF-TG) ENSMUSG00000022217	false
38496	miRNA-mRNA	mmu-miR-125b-5p (miRNA-mRNA) ENSMUSG00000067889	false
18016	TF-TG	ENSMUSG00000035158 (TF-TG) ENSMUSG00000022136	false
38492	miRNA-mRNA	mmu-miR-125b-5p (miRNA-mRNA) ENSMUSG00000060961	false
18012	TF-TG	ENSMUSG00000035158 (TF-TG) ENSMUSG00000021876	false
18011	TF-TG	ENSMUSG00000035158 (TF-TG) ENSMUSG00000021831	false
18010	TF-TG	ENSMUSG00000035158 (TF-TG) ENSMUSG00000021822	false
18008	TF-TG	ENSMUSG00000035158 (TF-TG) ENSMUSG00000021453	false
18007	TF-TG	ENSMUSG00000035158 (TF-TG) ENSMUSG00000021108	false
18006	TF-TG	ENSMUSG00000035158 (TF-TG) ENSMUSG00000020978	false
38485	miRNA-mRNA	mmu-miR-125b-5p (miRNA-mRNA) ENSMUSG00000056973	false
18004	TF-TG	ENSMUSG00000035158 (TF-TG) ENSMUSG00000020838	false
18003	TF-TG	ENSMUSG00000035158 (TF-TG) ENSMUSG00000020435	false
18002	TF-TG	ENSMUSG00000035158 (TF-TG) ENSMUSG00000020402	false
18001	TF-TG	ENSMUSG00000035158 (TF-TG) ENSMUSG00000020376	false
18000	TF-TG	ENSMUSG00000035158 (TF-TG) ENSMUSG00000020261	false
17999	TF-TG	ENSMUSG00000035158 (TF-TG) ENSMUSG00000020014	false
17998	TF-TG	ENSMUSG00000035158 (TF-TG) ENSMUSG00000019194	false
17997	TF-TG	ENSMUSG00000035158 (TF-TG) ENSMUSG00000018906	false
17994	TF-TG	ENSMUSG00000035158 (TF-TG) ENSMUSG00000017652	false
38473	miRNA-mRNA	mmu-miR-125b-5p (miRNA-mRNA) ENSMUSG00000054150	false
17993	TF-TG	ENSMUSG00000035158 (TF-TG) ENSMUSG00000017466	false
17990	TF-TG	ENSMUSG00000035158 (TF-TG) ENSMUSG00000014303	false
17989	TF-TG	ENSMUSG00000035158 (TF-TG) ENSMUSG00000012126	false
38468	miRNA-mRNA	mmu-miR-125b-5p (miRNA-mRNA) ENSMUSG00000046546	false
17987	TF-TG	ENSMUSG00000035158 (TF-TG) ENSMUSG00000011148	false
17985	TF-TG	ENSMUSG00000035158 (TF-TG) ENSMUSG00000006642	false
38461	miRNA-mRNA	mmu-miR-125b-5p (miRNA-mRNA) ENSMUSG00000049878	false
17981	TF-TG	ENSMUSG00000035158 (TF-TG) ENSMUSG00000005873	false
38460	miRNA-mRNA	mmu-miR-125b-5p (miRNA-mRNA) ENSMUSG00000048279	false
17980	TF-TG	ENSMUSG00000035158 (TF-TG) ENSMUSG00000005413	false
38458	miRNA-mRNA	mmu-miR-125b-5p (miRNA-mRNA) ENSMUSG00000047797	false
38457	miRNA-mRNA	mmu-miR-125b-5p (miRNA-mRNA) ENSMUSG00000050064	false
17977	TF-TG	ENSMUSG00000035158 (TF-TG) ENSMUSG00000004270	false
38455	miRNA-mRNA	mmu-miR-125b-5p (miRNA-mRNA) ENSMUSG00000050592	false
17975	TF-TG	ENSMUSG00000035158 (TF-TG) ENSMUSG00000002997	false
17974	TF-TG	ENSMUSG00000035158 (TF-TG) ENSMUSG00000002885	false
38453	miRNA-mRNA	mmu-miR-125b-5p (miRNA-mRNA) ENSMUSG00000048058	false
38450	miRNA-mRNA	mmu-miR-125b-5p (miRNA-mRNA) ENSMUSG00000050240	false
17970	TF-TG	ENSMUSG00000035158 (TF-TG) ENSMUSG00000000791	false
38448	miRNA-mRNA	mmu-miR-125b-5p (miRNA-mRNA) ENSMUSG00000048232	false
17968	TF-TG	ENSMUSG00000035158 (TF-TG) ENSMUSG00000000120	false
38443	miRNA-mRNA	mmu-miR-125b-5p (miRNA-mRNA) ENSMUSG00000044674	false
38441	miRNA-mRNA	mmu-miR-125b-5p (miRNA-mRNA) ENSMUSG00000042035	false
38439	miRNA-mRNA	mmu-miR-125b-5p (miRNA-mRNA) ENSMUSG00000042647	false
38438	miRNA-mRNA	mmu-miR-125b-5p (miRNA-mRNA) ENSMUSG00000043639	false
38426	miRNA-mRNA	mmu-miR-125b-5p (miRNA-mRNA) ENSMUSG00000039114	false
38423	miRNA-mRNA	mmu-miR-125b-5p (miRNA-mRNA) ENSMUSG00000039943	false
38418	miRNA-mRNA	mmu-miR-125b-5p (miRNA-mRNA) ENSMUSG00000038843	false
38409	miRNA-mRNA	mmu-miR-125b-5p (miRNA-mRNA) ENSMUSG00000038486	false
38406	miRNA-mRNA	mmu-miR-125b-5p (miRNA-mRNA) ENSMUSG00000037936	false
38405	miRNA-mRNA	mmu-miR-125b-5p (miRNA-mRNA) ENSMUSG00000037621	false
38404	miRNA-mRNA	mmu-miR-125b-5p (miRNA-mRNA) ENSMUSG00000037235	false
38398	miRNA-mRNA	mmu-miR-125b-5p (miRNA-mRNA) ENSMUSG00000034413	false
38395	miRNA-mRNA	mmu-miR-125b-5p (miRNA-mRNA) ENSMUSG00000035158	false
38393	miRNA-mRNA	mmu-miR-125b-5p (miRNA-mRNA) ENSMUSG00000032855	false
38389	miRNA-mRNA	mmu-miR-125b-5p (miRNA-mRNA) ENSMUSG00000033871	false
38388	miRNA-mRNA	mmu-miR-125b-5p (miRNA-mRNA) ENSMUSG00000032754	false
38386	miRNA-mRNA	mmu-miR-125b-5p (miRNA-mRNA) ENSMUSG00000032411	false
38383	miRNA-mRNA	mmu-miR-125b-5p (miRNA-mRNA) ENSMUSG00000032294	false
38375	miRNA-mRNA	mmu-miR-125b-5p (miRNA-mRNA) ENSMUSG00000033105	false
38373	miRNA-mRNA	mmu-miR-125b-5p (miRNA-mRNA) ENSMUSG00000032245	false
38364	miRNA-mRNA	mmu-miR-125b-5p (miRNA-mRNA) ENSMUSG00000031903	false
30172	TF-TG	ENSMUSG00000030717 (TF-TG) ENSMUSG00000005413	false
38356	miRNA-mRNA	mmu-miR-125b-5p (miRNA-mRNA) ENSMUSG00000031668	false
38346	miRNA-mRNA	mmu-miR-125b-5p (miRNA-mRNA) ENSMUSG00000028649	false
38344	miRNA-mRNA	mmu-miR-125b-5p (miRNA-mRNA) ENSMUSG00000029772	false
38334	miRNA-mRNA	mmu-miR-125b-5p (miRNA-mRNA) ENSMUSG00000029161	false
38333	miRNA-mRNA	mmu-miR-125b-5p (miRNA-mRNA) ENSMUSG00000026509	false
38329	miRNA-mRNA	mmu-miR-125b-5p (miRNA-mRNA) ENSMUSG00000026782	false
38327	miRNA-mRNA	mmu-miR-125b-5p (miRNA-mRNA) ENSMUSG00000026604	false
38326	miRNA-mRNA	mmu-miR-125b-5p (miRNA-mRNA) ENSMUSG00000026879	false
38325	miRNA-mRNA	mmu-miR-125b-5p (miRNA-mRNA) ENSMUSG00000026605	false
38324	miRNA-mRNA	mmu-miR-125b-5p (miRNA-mRNA) ENSMUSG00000027006	false
38321	miRNA-mRNA	mmu-miR-125b-5p (miRNA-mRNA) ENSMUSG00000027883	false
38319	miRNA-mRNA	mmu-miR-125b-5p (miRNA-mRNA) ENSMUSG00000028211	false
38317	miRNA-mRNA	mmu-miR-125b-5p (miRNA-mRNA) ENSMUSG00000025959	false
38312	miRNA-mRNA	mmu-miR-125b-5p (miRNA-mRNA) ENSMUSG00000024665	false
38311	miRNA-mRNA	mmu-miR-125b-5p (miRNA-mRNA) ENSMUSG00000026103	false
38310	miRNA-mRNA	mmu-miR-125b-5p (miRNA-mRNA) ENSMUSG00000026447	false
38302	miRNA-mRNA	mmu-miR-125b-5p (miRNA-mRNA) ENSMUSG00000026072	false
38297	miRNA-mRNA	mmu-miR-125b-5p (miRNA-mRNA) ENSMUSG00000025780	false
38293	miRNA-mRNA	mmu-miR-125b-5p (miRNA-mRNA) ENSMUSG00000025790	false
38290	miRNA-mRNA	mmu-miR-125b-5p (miRNA-mRNA) ENSMUSG00000022707	false
38287	miRNA-mRNA	mmu-miR-125b-5p (miRNA-mRNA) ENSMUSG00000024066	false
38275	miRNA-mRNA	mmu-miR-125b-5p (miRNA-mRNA) ENSMUSG00000022621	false
38269	miRNA-mRNA	mmu-miR-125b-5p (miRNA-mRNA) ENSMUSG00000021364	false
38266	miRNA-mRNA	mmu-miR-125b-5p (miRNA-mRNA) ENSMUSG00000022364	false
38264	miRNA-mRNA	mmu-miR-125b-5p (miRNA-mRNA) ENSMUSG00000021838	false
38250	miRNA-mRNA	mmu-miR-125b-5p (miRNA-mRNA) ENSMUSG00000020472	false
38248	miRNA-mRNA	mmu-miR-125b-5p (miRNA-mRNA) ENSMUSG00000018411	false
38247	miRNA-mRNA	mmu-miR-125b-5p (miRNA-mRNA) ENSMUSG00000020092	false
38244	miRNA-mRNA	mmu-miR-125b-5p (miRNA-mRNA) ENSMUSG00000018983	false
38243	miRNA-mRNA	mmu-miR-125b-5p (miRNA-mRNA) ENSMUSG00000018909	false
38241	miRNA-mRNA	mmu-miR-125b-5p (miRNA-mRNA) ENSMUSG00000019564	false
38232	miRNA-mRNA	mmu-miR-125b-5p (miRNA-mRNA) ENSMUSG00000006731	false
38228	miRNA-mRNA	mmu-miR-125b-5p (miRNA-mRNA) ENSMUSG00000017446	false
38226	miRNA-mRNA	mmu-miR-125b-5p (miRNA-mRNA) ENSMUSG00000013846	false
38223	miRNA-mRNA	mmu-miR-125b-5p (miRNA-mRNA) ENSMUSG00000003134	false
38222	miRNA-mRNA	mmu-miR-125b-5p (miRNA-mRNA) ENSMUSG00000000673	false
38221	miRNA-mRNA	mmu-miR-125b-5p (miRNA-mRNA) ENSMUSG00000000555	false
38217	miRNA-mRNA	mmu-miR-125b-5p (miRNA-mRNA) ENSMUSG00000005413	false
38216	miRNA-mRNA	mmu-miR-125b-5p (miRNA-mRNA) ENSMUSG00000000056	false
38215	miRNA-mRNA	mmu-miR-125b-5p (miRNA-mRNA) ENSMUSG00000001435	false
38214	miRNA-mRNA	mmu-miR-125b-5p (miRNA-mRNA) ENSMUSG00000003541	false
21224	TF-lincRNA	ENSMUSG00000027544 (TF-lincRNA) ENSMUSG00000099025	false
21223	TF-lincRNA	ENSMUSG00000027544 (TF-lincRNA) ENSMUSG00000097932	false
21221	TF-TG	ENSMUSG00000027544 (TF-TG) ENSMUSG00000096472	false
21219	TF-TG	ENSMUSG00000027544 (TF-TG) ENSMUSG00000074282	false
21218	TF-TG	ENSMUSG00000027544 (TF-TG) ENSMUSG00000074218	false
21216	TF-TG	ENSMUSG00000027544 (TF-TG) ENSMUSG00000072949	false
21214	TF-TG	ENSMUSG00000027544 (TF-TG) ENSMUSG00000072115	false
21213	TF-TG	ENSMUSG00000027544 (TF-TG) ENSMUSG00000070407	false
21211	TF-TG	ENSMUSG00000027544 (TF-TG) ENSMUSG00000069622	false
21210	TF-TG	ENSMUSG00000027544 (TF-TG) ENSMUSG00000069515	false
21209	TF-TG	ENSMUSG00000027544 (TF-TG) ENSMUSG00000069255	false
21206	TF-TG	ENSMUSG00000027544 (TF-TG) ENSMUSG00000062078	false
21205	TF-TG	ENSMUSG00000027544 (TF-TG) ENSMUSG00000061531	false
21204	TF-TG	ENSMUSG00000027544 (TF-TG) ENSMUSG00000060962	false
21201	TF-TG	ENSMUSG00000027544 (TF-TG) ENSMUSG00000054920	false
21199	TF-TG	ENSMUSG00000027544 (TF-TG) ENSMUSG00000054422	false
21197	TF-TG	ENSMUSG00000027544 (TF-TG) ENSMUSG00000054150	false
21196	TF-TG	ENSMUSG00000027544 (TF-TG) ENSMUSG00000053862	false
21195	TF-TG	ENSMUSG00000027544 (TF-TG) ENSMUSG00000053581	false
21194	TF-TG	ENSMUSG00000027544 (TF-TG) ENSMUSG00000053470	false
21187	TF-TG	ENSMUSG00000027544 (TF-TG) ENSMUSG00000048911	false
21186	TF-TG	ENSMUSG00000027544 (TF-TG) ENSMUSG00000048440	false
21182	TF-TG	ENSMUSG00000027544 (TF-TG) ENSMUSG00000046814	false
21180	TF-TG	ENSMUSG00000027544 (TF-TG) ENSMUSG00000044456	false
21177	TF-TG	ENSMUSG00000027544 (TF-TG) ENSMUSG00000043953	false
21174	TF-TG	ENSMUSG00000027544 (TF-TG) ENSMUSG00000042303	false
21172	TF-TG	ENSMUSG00000027544 (TF-TG) ENSMUSG00000041268	false
21170	TF-TG	ENSMUSG00000027544 (TF-TG) ENSMUSG00000040640	false
21169	TF-TG	ENSMUSG00000027544 (TF-TG) ENSMUSG00000040462	false
8881	TF-miRNA	ENSMUSG00000022479 (TF-miRNA) mmu-miR-1945	false
21168	TF-TG	ENSMUSG00000027544 (TF-TG) ENSMUSG00000040433	false
8877	TF-lincRNA	ENSMUSG00000022479 (TF-lincRNA) ENSMUSG00000044522	false
8876	TF-lincRNA	ENSMUSG00000022479 (TF-lincRNA) ENSMUSG00000085329	false
21163	TF-TG	ENSMUSG00000027544 (TF-TG) ENSMUSG00000039158	false
21162	TF-TG	ENSMUSG00000027544 (TF-TG) ENSMUSG00000038836	false
21161	TF-TG	ENSMUSG00000027544 (TF-TG) ENSMUSG00000038451	false
8873	TF-lincRNA	ENSMUSG00000022479 (TF-lincRNA) ENSMUSG00000075010	false
21160	TF-TG	ENSMUSG00000027544 (TF-TG) ENSMUSG00000038175	false
8872	TF-lincRNA	ENSMUSG00000022479 (TF-lincRNA) ENSMUSG00000102106	false
21158	TF-TG	ENSMUSG00000027544 (TF-TG) ENSMUSG00000037447	false
21157	TF-TG	ENSMUSG00000027544 (TF-TG) ENSMUSG00000036526	false
8867	TF-lincRNA	ENSMUSG00000022479 (TF-lincRNA) ENSMUSG00000111528	false
21154	TF-TG	ENSMUSG00000027544 (TF-TG) ENSMUSG00000035441	false
8866	TF-lincRNA	ENSMUSG00000022479 (TF-lincRNA) ENSMUSG00000099025	false
21153	TF-TG	ENSMUSG00000027544 (TF-TG) ENSMUSG00000035279	false
21152	TF-TG	ENSMUSG00000027544 (TF-TG) ENSMUSG00000034858	false
8864	TF-lincRNA	ENSMUSG00000022479 (TF-lincRNA) ENSMUSG00000109084	false
21151	TF-TG	ENSMUSG00000027544 (TF-TG) ENSMUSG00000033530	false
21150	TF-TG	ENSMUSG00000027544 (TF-TG) ENSMUSG00000032733	false
21148	TF-TG	ENSMUSG00000027544 (TF-TG) ENSMUSG00000032656	false
21145	TF-TG	ENSMUSG00000027544 (TF-TG) ENSMUSG00000032411	false
21143	TF-TG	ENSMUSG00000027544 (TF-TG) ENSMUSG00000032245	false
8855	TF-lincRNA	ENSMUSG00000022479 (TF-lincRNA) ENSMUSG00000097039	false
21141	TF-TG	ENSMUSG00000027544 (TF-TG) ENSMUSG00000031980	false
8852	TF-lincRNA	ENSMUSG00000022479 (TF-lincRNA) ENSMUSG00000097932	false
21138	TF-TG	ENSMUSG00000027544 (TF-TG) ENSMUSG00000030772	false
21137	TF-TG	ENSMUSG00000027544 (TF-TG) ENSMUSG00000030246	false
8848	TF-lincRNA	ENSMUSG00000022479 (TF-lincRNA) ENSMUSG00000097277	false
21135	TF-TG	ENSMUSG00000027544 (TF-TG) ENSMUSG00000029560	false
21134	TF-TG	ENSMUSG00000027544 (TF-TG) ENSMUSG00000029330	false
8846	TF-lincRNA	ENSMUSG00000022479 (TF-lincRNA) ENSMUSG00000097908	false
21133	TF-TG	ENSMUSG00000027544 (TF-TG) ENSMUSG00000028614	false
8845	TF-lincRNA	ENSMUSG00000022479 (TF-lincRNA) ENSMUSG00000097561	false
21131	TF-TG	ENSMUSG00000027544 (TF-TG) ENSMUSG00000027995	false
21130	TF-TG	ENSMUSG00000027544 (TF-TG) ENSMUSG00000027954	false
8842	TF-lincRNA	ENSMUSG00000022479 (TF-lincRNA) ENSMUSG00000085183	false
21128	TF-TG	ENSMUSG00000027544 (TF-TG) ENSMUSG00000026921	false
21127	TF-TG	ENSMUSG00000027544 (TF-TG) ENSMUSG00000026880	false
21126	TF-TG	ENSMUSG00000027544 (TF-TG) ENSMUSG00000026227	false
8838	TF-lincRNA	ENSMUSG00000022479 (TF-lincRNA) ENSMUSG00000104011	false
21124	TF-TG	ENSMUSG00000027544 (TF-TG) ENSMUSG00000025790	false
21123	TF-TG	ENSMUSG00000027544 (TF-TG) ENSMUSG00000025477	false
21122	TF-TG	ENSMUSG00000027544 (TF-TG) ENSMUSG00000024803	false
8833	TF-TG	ENSMUSG00000022479 (TF-TG) ENSMUSG00000110266	false
21120	TF-TG	ENSMUSG00000027544 (TF-TG) ENSMUSG00000024552	false
8832	TF-TG	ENSMUSG00000022479 (TF-TG) ENSMUSG00000110086	false
21119	TF-TG	ENSMUSG00000027544 (TF-TG) ENSMUSG00000024516	false
8831	TF-TG	ENSMUSG00000022479 (TF-TG) ENSMUSG00000109946	false
8829	TF-TG	ENSMUSG00000022479 (TF-TG) ENSMUSG00000108348	false
21116	TF-TG	ENSMUSG00000027544 (TF-TG) ENSMUSG00000024066	false
8828	TF-TG	ENSMUSG00000022479 (TF-TG) ENSMUSG00000098715	false
21113	TF-TG	ENSMUSG00000027544 (TF-TG) ENSMUSG00000022900	false
8823	TF-TG	ENSMUSG00000022479 (TF-TG) ENSMUSG00000096472	false
21110	TF-TG	ENSMUSG00000027544 (TF-TG) ENSMUSG00000021947	false
21109	TF-TG	ENSMUSG00000027544 (TF-TG) ENSMUSG00000021876	false
21108	TF-TG	ENSMUSG00000027544 (TF-TG) ENSMUSG00000021822	false
8819	TF-TG	ENSMUSG00000022479 (TF-TG) ENSMUSG00000095105	false
8818	TF-TG	ENSMUSG00000022479 (TF-TG) ENSMUSG00000094928	false
21105	TF-TG	ENSMUSG00000027544 (TF-TG) ENSMUSG00000021453	false
21104	TF-TG	ENSMUSG00000027544 (TF-TG) ENSMUSG00000021196	false
21103	TF-TG	ENSMUSG00000027544 (TF-TG) ENSMUSG00000021094	false
21102	TF-TG	ENSMUSG00000027544 (TF-TG) ENSMUSG00000020978	false
21101	TF-TG	ENSMUSG00000027544 (TF-TG) ENSMUSG00000020894	false
21099	TF-TG	ENSMUSG00000027544 (TF-TG) ENSMUSG00000020741	false
8811	TF-TG	ENSMUSG00000022479 (TF-TG) ENSMUSG00000094091	false
21097	TF-TG	ENSMUSG00000027544 (TF-TG) ENSMUSG00000020277	false
21095	TF-TG	ENSMUSG00000027544 (TF-TG) ENSMUSG00000017716	false
8807	TF-TG	ENSMUSG00000022479 (TF-TG) ENSMUSG00000091813	false
21093	TF-TG	ENSMUSG00000027544 (TF-TG) ENSMUSG00000014164	false
8804	TF-TG	ENSMUSG00000022479 (TF-TG) ENSMUSG00000091387	false
21091	TF-TG	ENSMUSG00000027544 (TF-TG) ENSMUSG00000012126	false
8802	TF-TG	ENSMUSG00000022479 (TF-TG) ENSMUSG00000090891	false
21089	TF-TG	ENSMUSG00000027544 (TF-TG) ENSMUSG00000011148	false
21088	TF-TG	ENSMUSG00000027544 (TF-TG) ENSMUSG00000005413	false
21086	TF-TG	ENSMUSG00000027544 (TF-TG) ENSMUSG00000003541	false
21082	TF-TG	ENSMUSG00000027544 (TF-TG) ENSMUSG00000000732	false
21081	TF-TG	ENSMUSG00000027544 (TF-TG) ENSMUSG00000000056	false
21080	TF-lincRNA	ENSMUSG00000026398 (TF-lincRNA) ENSMUSG00000044522	false
8792	TF-TG	ENSMUSG00000022479 (TF-TG) ENSMUSG00000081769	false
21079	TF-lincRNA	ENSMUSG00000026398 (TF-lincRNA) ENSMUSG00000085329	false
21077	TF-lincRNA	ENSMUSG00000026398 (TF-lincRNA) ENSMUSG00000102106	false
21076	TF-lincRNA	ENSMUSG00000026398 (TF-lincRNA) ENSMUSG00000109084	false
8787	TF-TG	ENSMUSG00000022479 (TF-TG) ENSMUSG00000079471	false
21069	TF-TG	ENSMUSG00000026398 (TF-TG) ENSMUSG00000110086	false
8781	TF-TG	ENSMUSG00000022479 (TF-TG) ENSMUSG00000079057	false
21066	TF-TG	ENSMUSG00000026398 (TF-TG) ENSMUSG00000095105	false
21065	TF-TG	ENSMUSG00000026398 (TF-TG) ENSMUSG00000094091	false
8777	TF-TG	ENSMUSG00000022479 (TF-TG) ENSMUSG00000079037	false
21062	TF-TG	ENSMUSG00000026398 (TF-TG) ENSMUSG00000079471	false
21061	TF-TG	ENSMUSG00000026398 (TF-TG) ENSMUSG00000079057	false
8773	TF-TG	ENSMUSG00000022479 (TF-TG) ENSMUSG00000078954	false
21059	TF-TG	ENSMUSG00000026398 (TF-TG) ENSMUSG00000078650	false
21058	TF-TG	ENSMUSG00000026398 (TF-TG) ENSMUSG00000078566	false
21057	TF-TG	ENSMUSG00000026398 (TF-TG) ENSMUSG00000078515	false
8768	TF-TG	ENSMUSG00000022479 (TF-TG) ENSMUSG00000078650	false
8767	TF-TG	ENSMUSG00000022479 (TF-TG) ENSMUSG00000078566	false
8766	TF-TG	ENSMUSG00000022479 (TF-TG) ENSMUSG00000078515	false
21053	TF-TG	ENSMUSG00000026398 (TF-TG) ENSMUSG00000074476	false
21049	TF-TG	ENSMUSG00000026398 (TF-TG) ENSMUSG00000072115	false
8760	TF-TG	ENSMUSG00000022479 (TF-TG) ENSMUSG00000075702	false
21045	TF-TG	ENSMUSG00000026398 (TF-TG) ENSMUSG00000070407	false
21044	TF-TG	ENSMUSG00000026398 (TF-TG) ENSMUSG00000070332	false
8756	TF-TG	ENSMUSG00000022479 (TF-TG) ENSMUSG00000075304	false
21043	TF-TG	ENSMUSG00000026398 (TF-TG) ENSMUSG00000069114	false
21041	TF-TG	ENSMUSG00000026398 (TF-TG) ENSMUSG00000068742	false
8749	TF-TG	ENSMUSG00000022479 (TF-TG) ENSMUSG00000074796	false
21036	TF-TG	ENSMUSG00000026398 (TF-TG) ENSMUSG00000066952	false
8747	TF-TG	ENSMUSG00000022479 (TF-TG) ENSMUSG00000074715	false
21032	TF-TG	ENSMUSG00000026398 (TF-TG) ENSMUSG00000064373	false
21030	TF-TG	ENSMUSG00000026398 (TF-TG) ENSMUSG00000064215	false
8741	TF-TG	ENSMUSG00000022479 (TF-TG) ENSMUSG00000074476	false
21028	TF-TG	ENSMUSG00000026398 (TF-TG) ENSMUSG00000064140	false
21026	TF-TG	ENSMUSG00000026398 (TF-TG) ENSMUSG00000063439	false
8738	TF-TG	ENSMUSG00000022479 (TF-TG) ENSMUSG00000074282	false
8737	TF-TG	ENSMUSG00000022479 (TF-TG) ENSMUSG00000074218	false
21023	TF-TG	ENSMUSG00000026398 (TF-TG) ENSMUSG00000062070	false
21021	TF-TG	ENSMUSG00000026398 (TF-TG) ENSMUSG00000061414	false
8733	TF-TG	ENSMUSG00000022479 (TF-TG) ENSMUSG00000074183	false
8728	TF-TG	ENSMUSG00000022479 (TF-TG) ENSMUSG00000072949	false
8727	TF-TG	ENSMUSG00000022479 (TF-TG) ENSMUSG00000072946	false
21014	TF-TG	ENSMUSG00000026398 (TF-TG) ENSMUSG00000059713	false
8725	TF-TG	ENSMUSG00000022479 (TF-TG) ENSMUSG00000072849	false
21009	TF-TG	ENSMUSG00000026398 (TF-TG) ENSMUSG00000059142	false
8720	TF-TG	ENSMUSG00000022479 (TF-TG) ENSMUSG00000072115	false
21007	TF-TG	ENSMUSG00000026398 (TF-TG) ENSMUSG00000058145	false
8719	TF-TG	ENSMUSG00000022479 (TF-TG) ENSMUSG00000071847	false
21005	TF-TG	ENSMUSG00000026398 (TF-TG) ENSMUSG00000056973	false
21004	TF-TG	ENSMUSG00000026398 (TF-TG) ENSMUSG00000056602	false
21003	TF-TG	ENSMUSG00000026398 (TF-TG) ENSMUSG00000055675	false
8715	TF-TG	ENSMUSG00000022479 (TF-TG) ENSMUSG00000071537	false
20999	TF-TG	ENSMUSG00000026398 (TF-TG) ENSMUSG00000054474	false
20997	TF-TG	ENSMUSG00000026398 (TF-TG) ENSMUSG00000054150	false
8709	TF-TG	ENSMUSG00000022479 (TF-TG) ENSMUSG00000070802	false
20996	TF-TG	ENSMUSG00000026398 (TF-TG) ENSMUSG00000053862	false
8708	TF-TG	ENSMUSG00000022479 (TF-TG) ENSMUSG00000070777	false
20995	TF-TG	ENSMUSG00000026398 (TF-TG) ENSMUSG00000053846	false
20994	TF-TG	ENSMUSG00000026398 (TF-TG) ENSMUSG00000053617	false
20993	TF-TG	ENSMUSG00000026398 (TF-TG) ENSMUSG00000053216	false
8705	TF-TG	ENSMUSG00000022479 (TF-TG) ENSMUSG00000070687	false
20990	TF-TG	ENSMUSG00000026398 (TF-TG) ENSMUSG00000052131	false
8702	TF-TG	ENSMUSG00000022479 (TF-TG) ENSMUSG00000070407	false
20989	TF-TG	ENSMUSG00000026398 (TF-TG) ENSMUSG00000052105	false
20988	TF-TG	ENSMUSG00000026398 (TF-TG) ENSMUSG00000051727	false
8700	TF-TG	ENSMUSG00000022479 (TF-TG) ENSMUSG00000070332	false
8699	TF-TG	ENSMUSG00000022479 (TF-TG) ENSMUSG00000070287	false
20985	TF-TG	ENSMUSG00000026398 (TF-TG) ENSMUSG00000050777	false
20984	TF-TG	ENSMUSG00000026398 (TF-TG) ENSMUSG00000050737	false
8694	TF-TG	ENSMUSG00000022479 (TF-TG) ENSMUSG00000069622	false
8693	TF-TG	ENSMUSG00000022479 (TF-TG) ENSMUSG00000069515	false
20980	TF-TG	ENSMUSG00000026398 (TF-TG) ENSMUSG00000049154	false
8691	TF-TG	ENSMUSG00000022479 (TF-TG) ENSMUSG00000069255	false
8690	TF-TG	ENSMUSG00000022479 (TF-TG) ENSMUSG00000069170	false
20977	TF-TG	ENSMUSG00000026398 (TF-TG) ENSMUSG00000048424	false
8689	TF-TG	ENSMUSG00000022479 (TF-TG) ENSMUSG00000069114	false
20976	TF-TG	ENSMUSG00000026398 (TF-TG) ENSMUSG00000048058	false
8687	TF-TG	ENSMUSG00000022479 (TF-TG) ENSMUSG00000068877	false
20974	TF-TG	ENSMUSG00000026398 (TF-TG) ENSMUSG00000047767	false
8685	TF-TG	ENSMUSG00000022479 (TF-TG) ENSMUSG00000068742	false
20972	TF-TG	ENSMUSG00000026398 (TF-TG) ENSMUSG00000047139	false
20970	TF-TG	ENSMUSG00000026398 (TF-TG) ENSMUSG00000046688	false
8681	TF-TG	ENSMUSG00000022479 (TF-TG) ENSMUSG00000068587	false
20967	TF-TG	ENSMUSG00000026398 (TF-TG) ENSMUSG00000046546	false
20966	TF-TG	ENSMUSG00000026398 (TF-TG) ENSMUSG00000046447	false
20965	TF-TG	ENSMUSG00000026398 (TF-TG) ENSMUSG00000046223	false
20964	TF-TG	ENSMUSG00000026398 (TF-TG) ENSMUSG00000046070	false
20963	TF-TG	ENSMUSG00000026398 (TF-TG) ENSMUSG00000045667	false
8674	TF-TG	ENSMUSG00000022479 (TF-TG) ENSMUSG00000067889	false
20961	TF-TG	ENSMUSG00000026398 (TF-TG) ENSMUSG00000044646	false
20958	TF-TG	ENSMUSG00000026398 (TF-TG) ENSMUSG00000043639	false
20957	TF-TG	ENSMUSG00000026398 (TF-TG) ENSMUSG00000042797	false
20954	TF-TG	ENSMUSG00000026398 (TF-TG) ENSMUSG00000042303	false
8666	TF-TG	ENSMUSG00000022479 (TF-TG) ENSMUSG00000066952	false
20953	TF-TG	ENSMUSG00000026398 (TF-TG) ENSMUSG00000042179	false
20952	TF-TG	ENSMUSG00000026398 (TF-TG) ENSMUSG00000042035	false
20951	TF-TG	ENSMUSG00000026398 (TF-TG) ENSMUSG00000041930	false
20949	TF-TG	ENSMUSG00000026398 (TF-TG) ENSMUSG00000041733	false
20947	TF-TG	ENSMUSG00000026398 (TF-TG) ENSMUSG00000041268	false
8658	TF-TG	ENSMUSG00000022479 (TF-TG) ENSMUSG00000064373	false
20943	TF-TG	ENSMUSG00000026398 (TF-TG) ENSMUSG00000041040	false
8655	TF-TG	ENSMUSG00000022479 (TF-TG) ENSMUSG00000064262	false
20942	TF-TG	ENSMUSG00000026398 (TF-TG) ENSMUSG00000040918	false
20941	TF-TG	ENSMUSG00000026398 (TF-TG) ENSMUSG00000040631	false
20940	TF-TG	ENSMUSG00000026398 (TF-TG) ENSMUSG00000040605	false
8652	TF-TG	ENSMUSG00000022479 (TF-TG) ENSMUSG00000064215	false
8651	TF-TG	ENSMUSG00000022479 (TF-TG) ENSMUSG00000064202	false
20938	TF-TG	ENSMUSG00000026398 (TF-TG) ENSMUSG00000040433	false
8649	TF-TG	ENSMUSG00000022479 (TF-TG) ENSMUSG00000064140	false
20936	TF-TG	ENSMUSG00000026398 (TF-TG) ENSMUSG00000040127	false
8648	TF-TG	ENSMUSG00000022479 (TF-TG) ENSMUSG00000064090	false
20934	TF-TG	ENSMUSG00000026398 (TF-TG) ENSMUSG00000039934	false
20933	TF-TG	ENSMUSG00000026398 (TF-TG) ENSMUSG00000039616	false
20932	TF-TG	ENSMUSG00000026398 (TF-TG) ENSMUSG00000039323	false
8643	TF-TG	ENSMUSG00000022479 (TF-TG) ENSMUSG00000063568	false
20929	TF-TG	ENSMUSG00000026398 (TF-TG) ENSMUSG00000039050	false
8641	TF-TG	ENSMUSG00000022479 (TF-TG) ENSMUSG00000063450	false
20928	TF-TG	ENSMUSG00000026398 (TF-TG) ENSMUSG00000038903	false
8640	TF-TG	ENSMUSG00000022479 (TF-TG) ENSMUSG00000063439	false
20927	TF-TG	ENSMUSG00000026398 (TF-TG) ENSMUSG00000038745	false
8639	TF-TG	ENSMUSG00000022479 (TF-TG) ENSMUSG00000063229	false
20926	TF-TG	ENSMUSG00000026398 (TF-TG) ENSMUSG00000038422	false
20925	TF-TG	ENSMUSG00000026398 (TF-TG) ENSMUSG00000038175	false
20924	TF-TG	ENSMUSG00000026398 (TF-TG) ENSMUSG00000037936	false
20923	TF-TG	ENSMUSG00000026398 (TF-TG) ENSMUSG00000037621	false
20922	TF-TG	ENSMUSG00000026398 (TF-TG) ENSMUSG00000037583	false
20921	TF-TG	ENSMUSG00000026398 (TF-TG) ENSMUSG00000037579	false
20918	TF-TG	ENSMUSG00000026398 (TF-TG) ENSMUSG00000037169	false
8630	TF-TG	ENSMUSG00000022479 (TF-TG) ENSMUSG00000062312	false
8629	TF-TG	ENSMUSG00000022479 (TF-TG) ENSMUSG00000062248	false
20916	TF-TG	ENSMUSG00000026398 (TF-TG) ENSMUSG00000036887	false
8628	TF-TG	ENSMUSG00000022479 (TF-TG) ENSMUSG00000062078	false
20915	TF-TG	ENSMUSG00000026398 (TF-TG) ENSMUSG00000036880	false
8627	TF-TG	ENSMUSG00000022479 (TF-TG) ENSMUSG00000062070	false
20913	TF-TG	ENSMUSG00000026398 (TF-TG) ENSMUSG00000036437	false
20912	TF-TG	ENSMUSG00000026398 (TF-TG) ENSMUSG00000036216	false
8621	TF-TG	ENSMUSG00000022479 (TF-TG) ENSMUSG00000061607	false
20908	TF-TG	ENSMUSG00000026398 (TF-TG) ENSMUSG00000035683	false
8620	TF-TG	ENSMUSG00000022479 (TF-TG) ENSMUSG00000061578	false
8619	TF-TG	ENSMUSG00000022479 (TF-TG) ENSMUSG00000061531	false
20906	TF-TG	ENSMUSG00000026398 (TF-TG) ENSMUSG00000035561	false
8618	TF-TG	ENSMUSG00000022479 (TF-TG) ENSMUSG00000061414	false
8617	TF-TG	ENSMUSG00000022479 (TF-TG) ENSMUSG00000060961	false
20903	TF-TG	ENSMUSG00000026398 (TF-TG) ENSMUSG00000035441	false
20899	TF-TG	ENSMUSG00000026398 (TF-TG) ENSMUSG00000034684	false
8610	TF-TG	ENSMUSG00000022479 (TF-TG) ENSMUSG00000060550	false
8609	TF-TG	ENSMUSG00000022479 (TF-TG) ENSMUSG00000060548	false
20895	TF-TG	ENSMUSG00000026398 (TF-TG) ENSMUSG00000033917	false
20894	TF-TG	ENSMUSG00000026398 (TF-TG) ENSMUSG00000033871	false
29083	TF-TG	ENSMUSG00000026077 (TF-TG) ENSMUSG00000025037	false
20890	TF-TG	ENSMUSG00000026398 (TF-TG) ENSMUSG00000033610	false
8602	TF-TG	ENSMUSG00000022479 (TF-TG) ENSMUSG00000060176	false
20888	TF-TG	ENSMUSG00000026398 (TF-TG) ENSMUSG00000033256	false
20887	TF-TG	ENSMUSG00000026398 (TF-TG) ENSMUSG00000033107	false
20886	TF-TG	ENSMUSG00000026398 (TF-TG) ENSMUSG00000032978	false
8598	TF-TG	ENSMUSG00000022479 (TF-TG) ENSMUSG00000059824	false
20884	TF-TG	ENSMUSG00000026398 (TF-TG) ENSMUSG00000032855	false
20883	TF-TG	ENSMUSG00000026398 (TF-TG) ENSMUSG00000032849	false
20882	TF-TG	ENSMUSG00000026398 (TF-TG) ENSMUSG00000032411	false
8593	TF-TG	ENSMUSG00000022479 (TF-TG) ENSMUSG00000059540	false
20880	TF-TG	ENSMUSG00000026398 (TF-TG) ENSMUSG00000032314	false
8592	TF-TG	ENSMUSG00000022479 (TF-TG) ENSMUSG00000059493	false
20879	TF-TG	ENSMUSG00000026398 (TF-TG) ENSMUSG00000032278	false
20876	TF-TG	ENSMUSG00000026398 (TF-TG) ENSMUSG00000032018	false
8587	TF-TG	ENSMUSG00000022479 (TF-TG) ENSMUSG00000059142	false
20874	TF-TG	ENSMUSG00000026398 (TF-TG) ENSMUSG00000031980	false
20873	TF-TG	ENSMUSG00000026398 (TF-TG) ENSMUSG00000031957	false
8583	TF-TG	ENSMUSG00000022479 (TF-TG) ENSMUSG00000058794	false
20870	TF-TG	ENSMUSG00000026398 (TF-TG) ENSMUSG00000031765	false
20869	TF-TG	ENSMUSG00000026398 (TF-TG) ENSMUSG00000031725	false
8581	TF-TG	ENSMUSG00000022479 (TF-TG) ENSMUSG00000058672	false
20868	TF-TG	ENSMUSG00000026398 (TF-TG) ENSMUSG00000031668	false
20862	TF-TG	ENSMUSG00000026398 (TF-TG) ENSMUSG00000030762	false
8574	TF-TG	ENSMUSG00000022479 (TF-TG) ENSMUSG00000058216	false
20861	TF-TG	ENSMUSG00000026398 (TF-TG) ENSMUSG00000030717	false
8573	TF-TG	ENSMUSG00000022479 (TF-TG) ENSMUSG00000058145	false
20859	TF-TG	ENSMUSG00000026398 (TF-TG) ENSMUSG00000030543	false
20857	TF-TG	ENSMUSG00000026398 (TF-TG) ENSMUSG00000030246	false
20856	TF-TG	ENSMUSG00000026398 (TF-TG) ENSMUSG00000029769	false
20854	TF-TG	ENSMUSG00000026398 (TF-TG) ENSMUSG00000029522	false
20853	TF-TG	ENSMUSG00000026398 (TF-TG) ENSMUSG00000029370	false
20852	TF-TG	ENSMUSG00000026398 (TF-TG) ENSMUSG00000029343	false
20851	TF-TG	ENSMUSG00000026398 (TF-TG) ENSMUSG00000029177	false
20850	TF-TG	ENSMUSG00000026398 (TF-TG) ENSMUSG00000029173	false
8560	TF-TG	ENSMUSG00000022479 (TF-TG) ENSMUSG00000057092	false
20847	TF-TG	ENSMUSG00000026398 (TF-TG) ENSMUSG00000028874	false
8558	TF-TG	ENSMUSG00000022479 (TF-TG) ENSMUSG00000056973	false
20844	TF-TG	ENSMUSG00000026398 (TF-TG) ENSMUSG00000028542	false
8556	TF-TG	ENSMUSG00000022479 (TF-TG) ENSMUSG00000056888	false
12650	TF-TG	ENSMUSG00000037583 (TF-TG) ENSMUSG00000071226	false
8554	TF-TG	ENSMUSG00000022479 (TF-TG) ENSMUSG00000056758	false
20841	TF-TG	ENSMUSG00000026398 (TF-TG) ENSMUSG00000028415	false
12649	TF-TG	ENSMUSG00000037583 (TF-TG) ENSMUSG00000053862	false
8553	TF-TG	ENSMUSG00000022479 (TF-TG) ENSMUSG00000056737	false
12648	TF-TG	ENSMUSG00000037583 (TF-TG) ENSMUSG00000042797	false
20839	TF-TG	ENSMUSG00000026398 (TF-TG) ENSMUSG00000028211	false
12647	TF-TG	ENSMUSG00000037583 (TF-TG) ENSMUSG00000042096	false
20838	TF-TG	ENSMUSG00000026398 (TF-TG) ENSMUSG00000028186	false
12646	TF-TG	ENSMUSG00000037583 (TF-TG) ENSMUSG00000038175	false
12644	TF-TG	ENSMUSG00000037583 (TF-TG) ENSMUSG00000034858	false
8548	TF-TG	ENSMUSG00000022479 (TF-TG) ENSMUSG00000056529	false
20835	TF-TG	ENSMUSG00000026398 (TF-TG) ENSMUSG00000027954	false
20834	TF-TG	ENSMUSG00000026398 (TF-TG) ENSMUSG00000027931	false
12642	TF-TG	ENSMUSG00000037583 (TF-TG) ENSMUSG00000033105	false
8546	TF-TG	ENSMUSG00000022479 (TF-TG) ENSMUSG00000056413	false
20833	TF-TG	ENSMUSG00000026398 (TF-TG) ENSMUSG00000027890	false
20832	TF-TG	ENSMUSG00000026398 (TF-TG) ENSMUSG00000027746	false
8544	TF-TG	ENSMUSG00000022479 (TF-TG) ENSMUSG00000056069	false
20831	TF-TG	ENSMUSG00000026398 (TF-TG) ENSMUSG00000027692	false
20830	TF-TG	ENSMUSG00000026398 (TF-TG) ENSMUSG00000027534	false
20828	TF-TG	ENSMUSG00000026398 (TF-TG) ENSMUSG00000027333	false
12636	TF-TG	ENSMUSG00000037583 (TF-TG) ENSMUSG00000027931	false
20827	TF-TG	ENSMUSG00000026398 (TF-TG) ENSMUSG00000027173	false
12635	TF-TG	ENSMUSG00000037583 (TF-TG) ENSMUSG00000027746	false
12633	TF-TG	ENSMUSG00000037583 (TF-TG) ENSMUSG00000026509	false
20824	TF-TG	ENSMUSG00000026398 (TF-TG) ENSMUSG00000026980	false
12631	TF-TG	ENSMUSG00000037583 (TF-TG) ENSMUSG00000026077	false
8535	TF-TG	ENSMUSG00000022479 (TF-TG) ENSMUSG00000055675	false
20822	TF-TG	ENSMUSG00000026398 (TF-TG) ENSMUSG00000026773	false
20821	TF-TG	ENSMUSG00000026398 (TF-TG) ENSMUSG00000026764	false
8533	TF-TG	ENSMUSG00000022479 (TF-TG) ENSMUSG00000055538	false
8532	TF-TG	ENSMUSG00000022479 (TF-TG) ENSMUSG00000055493	false
12627	TF-TG	ENSMUSG00000037583 (TF-TG) ENSMUSG00000022621	false
12626	TF-TG	ENSMUSG00000037583 (TF-TG) ENSMUSG00000021838	false
12625	TF-TG	ENSMUSG00000037583 (TF-TG) ENSMUSG00000020376	false
20816	TF-TG	ENSMUSG00000026398 (TF-TG) ENSMUSG00000026227	false
8528	TF-TG	ENSMUSG00000022479 (TF-TG) ENSMUSG00000055114	false
20815	TF-TG	ENSMUSG00000026398 (TF-TG) ENSMUSG00000026107	false
12623	TF-TG	ENSMUSG00000037583 (TF-TG) ENSMUSG00000026398	false
8527	TF-TG	ENSMUSG00000022479 (TF-TG) ENSMUSG00000054967	false
20814	TF-TG	ENSMUSG00000026398 (TF-TG) ENSMUSG00000026077	false
8526	TF-TG	ENSMUSG00000022479 (TF-TG) ENSMUSG00000054958	false
8525	TF-TG	ENSMUSG00000022479 (TF-TG) ENSMUSG00000054932	false
20812	TF-TG	ENSMUSG00000026398 (TF-TG) ENSMUSG00000025790	false
8524	TF-TG	ENSMUSG00000022479 (TF-TG) ENSMUSG00000054920	false
8523	TF-TG	ENSMUSG00000022479 (TF-TG) ENSMUSG00000054893	false
8522	TF-TG	ENSMUSG00000022479 (TF-TG) ENSMUSG00000054855	false
12616	TF-miRNA	ENSMUSG00000017950 (TF-miRNA) mmu-miR-1945	false
20807	TF-TG	ENSMUSG00000026398 (TF-TG) ENSMUSG00000025348	false
12614	TF-lincRNA	ENSMUSG00000017950 (TF-lincRNA) ENSMUSG00000044522	false
12612	TF-lincRNA	ENSMUSG00000017950 (TF-lincRNA) ENSMUSG00000075010	false
12610	TF-lincRNA	ENSMUSG00000017950 (TF-lincRNA) ENSMUSG00000111528	false
12609	TF-lincRNA	ENSMUSG00000017950 (TF-lincRNA) ENSMUSG00000109084	false
20800	TF-TG	ENSMUSG00000026398 (TF-TG) ENSMUSG00000024803	false
8512	TF-TG	ENSMUSG00000022479 (TF-TG) ENSMUSG00000054474	false
20799	TF-TG	ENSMUSG00000026398 (TF-TG) ENSMUSG00000024774	false
20797	TF-TG	ENSMUSG00000026398 (TF-TG) ENSMUSG00000024665	false
12605	TF-lincRNA	ENSMUSG00000017950 (TF-lincRNA) ENSMUSG00000097277	false
20796	TF-TG	ENSMUSG00000026398 (TF-TG) ENSMUSG00000024525	false
8508	TF-TG	ENSMUSG00000022479 (TF-TG) ENSMUSG00000054422	false
12603	TF-lincRNA	ENSMUSG00000017950 (TF-lincRNA) ENSMUSG00000097908	false
12602	TF-lincRNA	ENSMUSG00000017950 (TF-lincRNA) ENSMUSG00000097561	false
8506	TF-TG	ENSMUSG00000022479 (TF-TG) ENSMUSG00000054200	false
20793	TF-TG	ENSMUSG00000026398 (TF-TG) ENSMUSG00000024349	false
8504	TF-TG	ENSMUSG00000022479 (TF-TG) ENSMUSG00000054150	false
12599	TF-lincRNA	ENSMUSG00000017950 (TF-lincRNA) ENSMUSG00000104011	false
8502	TF-TG	ENSMUSG00000022479 (TF-TG) ENSMUSG00000053862	false
20789	TF-TG	ENSMUSG00000026398 (TF-TG) ENSMUSG00000024013	false
12596	TF-TG	ENSMUSG00000017950 (TF-TG) ENSMUSG00000110266	false
8500	TF-TG	ENSMUSG00000022479 (TF-TG) ENSMUSG00000053846	false
12595	TF-TG	ENSMUSG00000017950 (TF-TG) ENSMUSG00000110086	false
20786	TF-TG	ENSMUSG00000026398 (TF-TG) ENSMUSG00000023122	false
12594	TF-TG	ENSMUSG00000017950 (TF-TG) ENSMUSG00000109946	false
8497	TF-TG	ENSMUSG00000022479 (TF-TG) ENSMUSG00000053765	false
20783	TF-TG	ENSMUSG00000026398 (TF-TG) ENSMUSG00000022995	false
8495	TF-TG	ENSMUSG00000022479 (TF-TG) ENSMUSG00000053617	false
8494	TF-TG	ENSMUSG00000022479 (TF-TG) ENSMUSG00000053604	false
12589	TF-TG	ENSMUSG00000017950 (TF-TG) ENSMUSG00000095105	false
8493	TF-TG	ENSMUSG00000022479 (TF-TG) ENSMUSG00000053581	false
20780	TF-TG	ENSMUSG00000026398 (TF-TG) ENSMUSG00000022629	false
8492	TF-TG	ENSMUSG00000022479 (TF-TG) ENSMUSG00000053580	false
8491	TF-TG	ENSMUSG00000022479 (TF-TG) ENSMUSG00000053470	false
8490	TF-TG	ENSMUSG00000022479 (TF-TG) ENSMUSG00000053460	false
20777	TF-TG	ENSMUSG00000026398 (TF-TG) ENSMUSG00000022546	false
8489	TF-TG	ENSMUSG00000022479 (TF-TG) ENSMUSG00000053334	false
12584	TF-TG	ENSMUSG00000017950 (TF-TG) ENSMUSG00000094091	false
12583	TF-TG	ENSMUSG00000017950 (TF-TG) ENSMUSG00000091813	false
12582	TF-TG	ENSMUSG00000017950 (TF-TG) ENSMUSG00000091387	false
8486	TF-TG	ENSMUSG00000022479 (TF-TG) ENSMUSG00000053216	false
20773	TF-TG	ENSMUSG00000026398 (TF-TG) ENSMUSG00000022364	false
20771	TF-TG	ENSMUSG00000026398 (TF-TG) ENSMUSG00000022253	false
12579	TF-TG	ENSMUSG00000017950 (TF-TG) ENSMUSG00000081769	false
8483	TF-TG	ENSMUSG00000022479 (TF-TG) ENSMUSG00000053080	false
20769	TF-TG	ENSMUSG00000026398 (TF-TG) ENSMUSG00000022208	false
20768	TF-TG	ENSMUSG00000026398 (TF-TG) ENSMUSG00000022180	false
12576	TF-TG	ENSMUSG00000017950 (TF-TG) ENSMUSG00000079471	false
20767	TF-TG	ENSMUSG00000026398 (TF-TG) ENSMUSG00000022136	false
20766	TF-TG	ENSMUSG00000026398 (TF-TG) ENSMUSG00000022094	false
12574	TF-TG	ENSMUSG00000017950 (TF-TG) ENSMUSG00000079057	false
12573	TF-TG	ENSMUSG00000017950 (TF-TG) ENSMUSG00000079037	false
20763	TF-TG	ENSMUSG00000026398 (TF-TG) ENSMUSG00000021957	false
20761	TF-TG	ENSMUSG00000026398 (TF-TG) ENSMUSG00000021876	false
12569	TF-TG	ENSMUSG00000017950 (TF-TG) ENSMUSG00000078954	false
8473	TF-TG	ENSMUSG00000022479 (TF-TG) ENSMUSG00000052584	false
20760	TF-TG	ENSMUSG00000026398 (TF-TG) ENSMUSG00000021831	false
8472	TF-TG	ENSMUSG00000022479 (TF-TG) ENSMUSG00000052560	false
12567	TF-TG	ENSMUSG00000017950 (TF-TG) ENSMUSG00000078650	false
12566	TF-TG	ENSMUSG00000017950 (TF-TG) ENSMUSG00000078515	false
20757	TF-TG	ENSMUSG00000026398 (TF-TG) ENSMUSG00000021477	false
8469	TF-TG	ENSMUSG00000022479 (TF-TG) ENSMUSG00000052384	false
8468	TF-TG	ENSMUSG00000022479 (TF-TG) ENSMUSG00000052353	false
12561	TF-TG	ENSMUSG00000017950 (TF-TG) ENSMUSG00000075702	false
8465	TF-TG	ENSMUSG00000022479 (TF-TG) ENSMUSG00000052131	false
20752	TF-TG	ENSMUSG00000026398 (TF-TG) ENSMUSG00000021094	false
8464	TF-TG	ENSMUSG00000022479 (TF-TG) ENSMUSG00000052105	false
12558	TF-TG	ENSMUSG00000017950 (TF-TG) ENSMUSG00000074715	false
20749	TF-TG	ENSMUSG00000026398 (TF-TG) ENSMUSG00000020741	false
20747	TF-TG	ENSMUSG00000026398 (TF-TG) ENSMUSG00000020715	false
12555	TF-TG	ENSMUSG00000017950 (TF-TG) ENSMUSG00000074476	false
8458	TF-TG	ENSMUSG00000022479 (TF-TG) ENSMUSG00000051727	false
20744	TF-TG	ENSMUSG00000026398 (TF-TG) ENSMUSG00000020641	false
12552	TF-TG	ENSMUSG00000017950 (TF-TG) ENSMUSG00000074218	false
20742	TF-TG	ENSMUSG00000026398 (TF-TG) ENSMUSG00000020407	false
8454	TF-TG	ENSMUSG00000022479 (TF-TG) ENSMUSG00000051498	false
12548	TF-TG	ENSMUSG00000017950 (TF-TG) ENSMUSG00000074183	false
8452	TF-TG	ENSMUSG00000022479 (TF-TG) ENSMUSG00000051343	false
20739	TF-TG	ENSMUSG00000026398 (TF-TG) ENSMUSG00000020277	false
20737	TF-TG	ENSMUSG00000026398 (TF-TG) ENSMUSG00000020009	false
8449	TF-TG	ENSMUSG00000022479 (TF-TG) ENSMUSG00000051314	false
20736	TF-TG	ENSMUSG00000026398 (TF-TG) ENSMUSG00000019945	false
12544	TF-TG	ENSMUSG00000017950 (TF-TG) ENSMUSG00000072946	false
20735	TF-TG	ENSMUSG00000026398 (TF-TG) ENSMUSG00000019942	false
12543	TF-TG	ENSMUSG00000017950 (TF-TG) ENSMUSG00000072849	false
8447	TF-TG	ENSMUSG00000022479 (TF-TG) ENSMUSG00000051185	false
20734	TF-TG	ENSMUSG00000026398 (TF-TG) ENSMUSG00000018983	false
20733	TF-TG	ENSMUSG00000026398 (TF-TG) ENSMUSG00000018909	false
20732	TF-TG	ENSMUSG00000026398 (TF-TG) ENSMUSG00000018752	false
12538	TF-TG	ENSMUSG00000017950 (TF-TG) ENSMUSG00000072115	false
20729	TF-TG	ENSMUSG00000026398 (TF-TG) ENSMUSG00000018042	false
20727	TF-TG	ENSMUSG00000026398 (TF-TG) ENSMUSG00000017692	false
12535	TF-TG	ENSMUSG00000017950 (TF-TG) ENSMUSG00000071537	false
8439	TF-TG	ENSMUSG00000022479 (TF-TG) ENSMUSG00000050777	false
20726	TF-TG	ENSMUSG00000026398 (TF-TG) ENSMUSG00000017453	false
20725	TF-TG	ENSMUSG00000026398 (TF-TG) ENSMUSG00000016541	false
12533	TF-TG	ENSMUSG00000017950 (TF-TG) ENSMUSG00000071226	false
8437	TF-TG	ENSMUSG00000022479 (TF-TG) ENSMUSG00000050737	false
8436	TF-TG	ENSMUSG00000022479 (TF-TG) ENSMUSG00000050721	false
20723	TF-TG	ENSMUSG00000026398 (TF-TG) ENSMUSG00000015850	false
20722	TF-TG	ENSMUSG00000026398 (TF-TG) ENSMUSG00000015647	false
20721	TF-TG	ENSMUSG00000026398 (TF-TG) ENSMUSG00000015112	false
12529	TF-TG	ENSMUSG00000017950 (TF-TG) ENSMUSG00000070777	false
8433	TF-TG	ENSMUSG00000022479 (TF-TG) ENSMUSG00000050592	false
20720	TF-TG	ENSMUSG00000026398 (TF-TG) ENSMUSG00000014599	false
12527	TF-TG	ENSMUSG00000017950 (TF-TG) ENSMUSG00000070687	false
20718	TF-TG	ENSMUSG00000026398 (TF-TG) ENSMUSG00000014303	false
12524	TF-TG	ENSMUSG00000017950 (TF-TG) ENSMUSG00000070332	false
8428	TF-TG	ENSMUSG00000022479 (TF-TG) ENSMUSG00000050270	false
12523	TF-TG	ENSMUSG00000017950 (TF-TG) ENSMUSG00000070287	false
8427	TF-TG	ENSMUSG00000022479 (TF-TG) ENSMUSG00000050240	false
20713	TF-TG	ENSMUSG00000026398 (TF-TG) ENSMUSG00000007207	false
8425	TF-TG	ENSMUSG00000022479 (TF-TG) ENSMUSG00000050103	false
20712	TF-TG	ENSMUSG00000026398 (TF-TG) ENSMUSG00000006800	false
12520	TF-TG	ENSMUSG00000017950 (TF-TG) ENSMUSG00000069170	false
8424	TF-TG	ENSMUSG00000022479 (TF-TG) ENSMUSG00000050064	false
12519	TF-TG	ENSMUSG00000017950 (TF-TG) ENSMUSG00000069114	false
20710	TF-TG	ENSMUSG00000026398 (TF-TG) ENSMUSG00000006731	false
12518	TF-TG	ENSMUSG00000017950 (TF-TG) ENSMUSG00000068877	false
8422	TF-TG	ENSMUSG00000022479 (TF-TG) ENSMUSG00000049878	false
20709	TF-TG	ENSMUSG00000026398 (TF-TG) ENSMUSG00000006494	false
20708	TF-TG	ENSMUSG00000026398 (TF-TG) ENSMUSG00000005873	false
12516	TF-TG	ENSMUSG00000017950 (TF-TG) ENSMUSG00000068742	false
8420	TF-TG	ENSMUSG00000022479 (TF-TG) ENSMUSG00000049858	false
20707	TF-TG	ENSMUSG00000026398 (TF-TG) ENSMUSG00000005677	false
12514	TF-TG	ENSMUSG00000017950 (TF-TG) ENSMUSG00000068587	false
20705	TF-TG	ENSMUSG00000026398 (TF-TG) ENSMUSG00000005413	false
20704	TF-TG	ENSMUSG00000026398 (TF-TG) ENSMUSG00000004951	false
8415	TF-TG	ENSMUSG00000022479 (TF-TG) ENSMUSG00000049588	false
20702	TF-TG	ENSMUSG00000026398 (TF-TG) ENSMUSG00000004270	false
8414	TF-TG	ENSMUSG00000022479 (TF-TG) ENSMUSG00000049580	false
20698	TF-TG	ENSMUSG00000026398 (TF-TG) ENSMUSG00000003134	false
8408	TF-TG	ENSMUSG00000022479 (TF-TG) ENSMUSG00000049184	false
20695	TF-TG	ENSMUSG00000026398 (TF-TG) ENSMUSG00000000791	false
12503	TF-TG	ENSMUSG00000017950 (TF-TG) ENSMUSG00000064373	false
8407	TF-TG	ENSMUSG00000022479 (TF-TG) ENSMUSG00000049154	false
20693	TF-TG	ENSMUSG00000026398 (TF-TG) ENSMUSG00000000126	false
20692	TF-TG	ENSMUSG00000026398 (TF-TG) ENSMUSG00000000056	false
12498	TF-TG	ENSMUSG00000017950 (TF-TG) ENSMUSG00000064215	false
8401	TF-TG	ENSMUSG00000022479 (TF-TG) ENSMUSG00000048911	false
12496	TF-TG	ENSMUSG00000017950 (TF-TG) ENSMUSG00000064140	false
12493	TF-TG	ENSMUSG00000017950 (TF-TG) ENSMUSG00000063568	false
12491	TF-TG	ENSMUSG00000017950 (TF-TG) ENSMUSG00000063439	false
12490	TF-TG	ENSMUSG00000017950 (TF-TG) ENSMUSG00000063229	false
8392	TF-TG	ENSMUSG00000022479 (TF-TG) ENSMUSG00000048473	false
12487	TF-TG	ENSMUSG00000017950 (TF-TG) ENSMUSG00000062312	false
8391	TF-TG	ENSMUSG00000022479 (TF-TG) ENSMUSG00000048458	false
12486	TF-TG	ENSMUSG00000017950 (TF-TG) ENSMUSG00000062248	false
12485	TF-TG	ENSMUSG00000017950 (TF-TG) ENSMUSG00000062070	false
8389	TF-TG	ENSMUSG00000022479 (TF-TG) ENSMUSG00000048440	false
8388	TF-TG	ENSMUSG00000022479 (TF-TG) ENSMUSG00000048424	false
8387	TF-TG	ENSMUSG00000022479 (TF-TG) ENSMUSG00000048376	false
12481	TF-TG	ENSMUSG00000017950 (TF-TG) ENSMUSG00000061578	false
12480	TF-TG	ENSMUSG00000017950 (TF-TG) ENSMUSG00000061414	false
8384	TF-TG	ENSMUSG00000022479 (TF-TG) ENSMUSG00000048279	false
8383	TF-TG	ENSMUSG00000022479 (TF-TG) ENSMUSG00000048232	false
8382	TF-TG	ENSMUSG00000022479 (TF-TG) ENSMUSG00000048217	false
12477	TF-TG	ENSMUSG00000017950 (TF-TG) ENSMUSG00000060550	false
12476	TF-TG	ENSMUSG00000017950 (TF-TG) ENSMUSG00000060548	false
12474	TF-TG	ENSMUSG00000017950 (TF-TG) ENSMUSG00000060176	false
8377	TF-TG	ENSMUSG00000022479 (TF-TG) ENSMUSG00000048058	false
12472	TF-TG	ENSMUSG00000017950 (TF-TG) ENSMUSG00000059713	false
8373	TF-TG	ENSMUSG00000022479 (TF-TG) ENSMUSG00000047976	false
12468	TF-TG	ENSMUSG00000017950 (TF-TG) ENSMUSG00000059142	false
8372	TF-TG	ENSMUSG00000022479 (TF-TG) ENSMUSG00000047963	false
12466	TF-TG	ENSMUSG00000017950 (TF-TG) ENSMUSG00000058794	false
12465	TF-TG	ENSMUSG00000017950 (TF-TG) ENSMUSG00000058672	false
8367	TF-TG	ENSMUSG00000022479 (TF-TG) ENSMUSG00000047797	false
8366	TF-TG	ENSMUSG00000022479 (TF-TG) ENSMUSG00000047767	false
12461	TF-TG	ENSMUSG00000017950 (TF-TG) ENSMUSG00000058216	false
12453	TF-TG	ENSMUSG00000017950 (TF-TG) ENSMUSG00000057092	false
12451	TF-TG	ENSMUSG00000017950 (TF-TG) ENSMUSG00000056973	false
8355	TF-TG	ENSMUSG00000022479 (TF-TG) ENSMUSG00000047501	false
12449	TF-TG	ENSMUSG00000017950 (TF-TG) ENSMUSG00000056888	false
12448	TF-TG	ENSMUSG00000017950 (TF-TG) ENSMUSG00000056758	false
12447	TF-TG	ENSMUSG00000017950 (TF-TG) ENSMUSG00000056737	false
24734	TF-lincRNA	ENSMUSG00000025025 (TF-lincRNA) ENSMUSG00000109084	false
8350	TF-TG	ENSMUSG00000022479 (TF-TG) ENSMUSG00000047139	false
24732	TF-lincRNA	ENSMUSG00000025025 (TF-lincRNA) ENSMUSG00000097039	false
12444	TF-TG	ENSMUSG00000017950 (TF-TG) ENSMUSG00000056413	false
8348	TF-TG	ENSMUSG00000022479 (TF-TG) ENSMUSG00000046841	false
24731	TF-lincRNA	ENSMUSG00000025025 (TF-lincRNA) ENSMUSG00000097287	false
8347	TF-TG	ENSMUSG00000022479 (TF-TG) ENSMUSG00000046814	false
24729	TF-TG	ENSMUSG00000025025 (TF-TG) ENSMUSG00000110266	false
24728	TF-TG	ENSMUSG00000025025 (TF-TG) ENSMUSG00000108348	false
8344	TF-TG	ENSMUSG00000022479 (TF-TG) ENSMUSG00000046688	false
24727	TF-TG	ENSMUSG00000025025 (TF-TG) ENSMUSG00000098715	false
12438	TF-TG	ENSMUSG00000017950 (TF-TG) ENSMUSG00000055675	false
24725	TF-TG	ENSMUSG00000025025 (TF-TG) ENSMUSG00000094928	false
12436	TF-TG	ENSMUSG00000017950 (TF-TG) ENSMUSG00000055538	false
24723	TF-TG	ENSMUSG00000025025 (TF-TG) ENSMUSG00000094091	false
12435	TF-TG	ENSMUSG00000017950 (TF-TG) ENSMUSG00000055114	false
12433	TF-TG	ENSMUSG00000017950 (TF-TG) ENSMUSG00000054967	false
8337	TF-TG	ENSMUSG00000022479 (TF-TG) ENSMUSG00000046546	false
24720	TF-TG	ENSMUSG00000025025 (TF-TG) ENSMUSG00000079057	false
12432	TF-TG	ENSMUSG00000017950 (TF-TG) ENSMUSG00000054958	false
8336	TF-TG	ENSMUSG00000022479 (TF-TG) ENSMUSG00000046447	false
24719	TF-TG	ENSMUSG00000025025 (TF-TG) ENSMUSG00000079037	false
12431	TF-TG	ENSMUSG00000017950 (TF-TG) ENSMUSG00000054932	false
24718	TF-TG	ENSMUSG00000025025 (TF-TG) ENSMUSG00000078650	false
12430	TF-TG	ENSMUSG00000017950 (TF-TG) ENSMUSG00000054920	false
24717	TF-TG	ENSMUSG00000025025 (TF-TG) ENSMUSG00000078566	false
12429	TF-TG	ENSMUSG00000017950 (TF-TG) ENSMUSG00000054855	false
8332	TF-TG	ENSMUSG00000022479 (TF-TG) ENSMUSG00000046295	false
8331	TF-TG	ENSMUSG00000022479 (TF-TG) ENSMUSG00000046242	false
8330	TF-TG	ENSMUSG00000022479 (TF-TG) ENSMUSG00000046223	false
24712	TF-TG	ENSMUSG00000025025 (TF-TG) ENSMUSG00000075702	false
8326	TF-TG	ENSMUSG00000022479 (TF-TG) ENSMUSG00000046093	false
24709	TF-TG	ENSMUSG00000025025 (TF-TG) ENSMUSG00000074282	false
8325	TF-TG	ENSMUSG00000022479 (TF-TG) ENSMUSG00000046070	false
12420	TF-TG	ENSMUSG00000017950 (TF-TG) ENSMUSG00000054474	false
24706	TF-TG	ENSMUSG00000025025 (TF-TG) ENSMUSG00000072115	false
24705	TF-TG	ENSMUSG00000025025 (TF-TG) ENSMUSG00000071226	false
12417	TF-TG	ENSMUSG00000017950 (TF-TG) ENSMUSG00000054422	false
12416	TF-TG	ENSMUSG00000017950 (TF-TG) ENSMUSG00000054200	false
8320	TF-TG	ENSMUSG00000022479 (TF-TG) ENSMUSG00000045667	false
12415	TF-TG	ENSMUSG00000017950 (TF-TG) ENSMUSG00000054150	false
8319	TF-TG	ENSMUSG00000022479 (TF-TG) ENSMUSG00000045629	false
24702	TF-TG	ENSMUSG00000025025 (TF-TG) ENSMUSG00000069114	false
12413	TF-TG	ENSMUSG00000017950 (TF-TG) ENSMUSG00000053862	false
8317	TF-TG	ENSMUSG00000022479 (TF-TG) ENSMUSG00000045382	false
24700	TF-TG	ENSMUSG00000025025 (TF-TG) ENSMUSG00000068742	false
12412	TF-TG	ENSMUSG00000017950 (TF-TG) ENSMUSG00000053846	false
24699	TF-TG	ENSMUSG00000025025 (TF-TG) ENSMUSG00000068154	false
12409	TF-TG	ENSMUSG00000017950 (TF-TG) ENSMUSG00000053617	false
12408	TF-TG	ENSMUSG00000017950 (TF-TG) ENSMUSG00000053604	false
8312	TF-TG	ENSMUSG00000022479 (TF-TG) ENSMUSG00000045094	false
24695	TF-TG	ENSMUSG00000025025 (TF-TG) ENSMUSG00000064215	false
12407	TF-TG	ENSMUSG00000017950 (TF-TG) ENSMUSG00000053580	false
24694	TF-TG	ENSMUSG00000025025 (TF-TG) ENSMUSG00000064140	false
12406	TF-TG	ENSMUSG00000017950 (TF-TG) ENSMUSG00000053470	false
24693	TF-TG	ENSMUSG00000025025 (TF-TG) ENSMUSG00000063229	false
12405	TF-TG	ENSMUSG00000017950 (TF-TG) ENSMUSG00000053334	false
8309	TF-TG	ENSMUSG00000022479 (TF-TG) ENSMUSG00000045007	false
24692	TF-TG	ENSMUSG00000025025 (TF-TG) ENSMUSG00000062078	false
12403	TF-TG	ENSMUSG00000017950 (TF-TG) ENSMUSG00000053216	false
8305	TF-TG	ENSMUSG00000022479 (TF-TG) ENSMUSG00000044674	false
24688	TF-TG	ENSMUSG00000025025 (TF-TG) ENSMUSG00000059824	false
8304	TF-TG	ENSMUSG00000022479 (TF-TG) ENSMUSG00000044646	false
24687	TF-TG	ENSMUSG00000025025 (TF-TG) ENSMUSG00000059713	false
12399	TF-TG	ENSMUSG00000017950 (TF-TG) ENSMUSG00000052584	false
24686	TF-TG	ENSMUSG00000025025 (TF-TG) ENSMUSG00000059540	false
12398	TF-TG	ENSMUSG00000017950 (TF-TG) ENSMUSG00000052560	false
8302	TF-TG	ENSMUSG00000022479 (TF-TG) ENSMUSG00000044456	false
24683	TF-TG	ENSMUSG00000025025 (TF-TG) ENSMUSG00000058672	false
12395	TF-TG	ENSMUSG00000017950 (TF-TG) ENSMUSG00000052384	false
12394	TF-TG	ENSMUSG00000017950 (TF-TG) ENSMUSG00000052353	false
8298	TF-TG	ENSMUSG00000022479 (TF-TG) ENSMUSG00000044254	false
24681	TF-TG	ENSMUSG00000025025 (TF-TG) ENSMUSG00000058145	false
12392	TF-TG	ENSMUSG00000017950 (TF-TG) ENSMUSG00000052131	false
12391	TF-TG	ENSMUSG00000017950 (TF-TG) ENSMUSG00000052105	false
8295	TF-TG	ENSMUSG00000022479 (TF-TG) ENSMUSG00000044072	false
24678	TF-TG	ENSMUSG00000025025 (TF-TG) ENSMUSG00000056737	false
12389	TF-TG	ENSMUSG00000017950 (TF-TG) ENSMUSG00000051727	false
24676	TF-TG	ENSMUSG00000025025 (TF-TG) ENSMUSG00000056602	false
8291	TF-TG	ENSMUSG00000022479 (TF-TG) ENSMUSG00000043953	false
24674	TF-TG	ENSMUSG00000025025 (TF-TG) ENSMUSG00000056413	false
12386	TF-TG	ENSMUSG00000017950 (TF-TG) ENSMUSG00000051498	false
24672	TF-TG	ENSMUSG00000025025 (TF-TG) ENSMUSG00000054967	false
12384	TF-TG	ENSMUSG00000017950 (TF-TG) ENSMUSG00000051343	false
8288	TF-TG	ENSMUSG00000022479 (TF-TG) ENSMUSG00000043639	false
24671	TF-TG	ENSMUSG00000025025 (TF-TG) ENSMUSG00000054920	false
24670	TF-TG	ENSMUSG00000025025 (TF-TG) ENSMUSG00000054893	false
12382	TF-TG	ENSMUSG00000017950 (TF-TG) ENSMUSG00000051314	false
12381	TF-TG	ENSMUSG00000017950 (TF-TG) ENSMUSG00000050777	false
24668	TF-TG	ENSMUSG00000025025 (TF-TG) ENSMUSG00000054150	false
12380	TF-TG	ENSMUSG00000017950 (TF-TG) ENSMUSG00000050721	false
24667	TF-TG	ENSMUSG00000025025 (TF-TG) ENSMUSG00000053846	false
8283	TF-TG	ENSMUSG00000022479 (TF-TG) ENSMUSG00000043391	false
24665	TF-TG	ENSMUSG00000025025 (TF-TG) ENSMUSG00000053460	false
8281	TF-TG	ENSMUSG00000022479 (TF-TG) ENSMUSG00000043004	false
12375	TF-TG	ENSMUSG00000017950 (TF-TG) ENSMUSG00000050270	false
12374	TF-TG	ENSMUSG00000017950 (TF-TG) ENSMUSG00000050240	false
12373	TF-TG	ENSMUSG00000017950 (TF-TG) ENSMUSG00000050103	false
12372	TF-TG	ENSMUSG00000017950 (TF-TG) ENSMUSG00000050064	false
8275	TF-TG	ENSMUSG00000022479 (TF-TG) ENSMUSG00000042797	false
24658	TF-TG	ENSMUSG00000025025 (TF-TG) ENSMUSG00000051343	false
12370	TF-TG	ENSMUSG00000017950 (TF-TG) ENSMUSG00000049858	false
24657	TF-TG	ENSMUSG00000025025 (TF-TG) ENSMUSG00000050721	false
12368	TF-TG	ENSMUSG00000017950 (TF-TG) ENSMUSG00000049588	false
24653	TF-TG	ENSMUSG00000025025 (TF-TG) ENSMUSG00000050270	false
12365	TF-TG	ENSMUSG00000017950 (TF-TG) ENSMUSG00000048911	false
8268	TF-TG	ENSMUSG00000022479 (TF-TG) ENSMUSG00000042647	false
24651	TF-TG	ENSMUSG00000025025 (TF-TG) ENSMUSG00000049878	false
12363	TF-TG	ENSMUSG00000017950 (TF-TG) ENSMUSG00000048440	false
12362	TF-TG	ENSMUSG00000017950 (TF-TG) ENSMUSG00000048424	false
24649	TF-TG	ENSMUSG00000025025 (TF-TG) ENSMUSG00000049858	false
12361	TF-TG	ENSMUSG00000017950 (TF-TG) ENSMUSG00000048217	false
12360	TF-TG	ENSMUSG00000017950 (TF-TG) ENSMUSG00000048058	false
24647	TF-TG	ENSMUSG00000025025 (TF-TG) ENSMUSG00000049154	false
12358	TF-TG	ENSMUSG00000017950 (TF-TG) ENSMUSG00000047907	false
12356	TF-TG	ENSMUSG00000017950 (TF-TG) ENSMUSG00000047797	false
24642	TF-TG	ENSMUSG00000025025 (TF-TG) ENSMUSG00000048440	false
12354	TF-TG	ENSMUSG00000017950 (TF-TG) ENSMUSG00000047501	false
8258	TF-TG	ENSMUSG00000022479 (TF-TG) ENSMUSG00000042333	false
24641	TF-TG	ENSMUSG00000025025 (TF-TG) ENSMUSG00000048376	false
24640	TF-TG	ENSMUSG00000025025 (TF-TG) ENSMUSG00000048232	false
12352	TF-TG	ENSMUSG00000017950 (TF-TG) ENSMUSG00000047139	false
8256	TF-TG	ENSMUSG00000022479 (TF-TG) ENSMUSG00000042303	false
24639	TF-TG	ENSMUSG00000025025 (TF-TG) ENSMUSG00000048217	false
12351	TF-TG	ENSMUSG00000017950 (TF-TG) ENSMUSG00000046814	false
8254	TF-TG	ENSMUSG00000022479 (TF-TG) ENSMUSG00000042258	false
8252	TF-TG	ENSMUSG00000022479 (TF-TG) ENSMUSG00000042195	false
24635	TF-TG	ENSMUSG00000025025 (TF-TG) ENSMUSG00000047963	false
12347	TF-TG	ENSMUSG00000017950 (TF-TG) ENSMUSG00000046688	false
8251	TF-TG	ENSMUSG00000022479 (TF-TG) ENSMUSG00000042179	false
8249	TF-TG	ENSMUSG00000022479 (TF-TG) ENSMUSG00000042115	false
12344	TF-TG	ENSMUSG00000017950 (TF-TG) ENSMUSG00000046546	false
8248	TF-TG	ENSMUSG00000022479 (TF-TG) ENSMUSG00000042109	false
12343	TF-TG	ENSMUSG00000017950 (TF-TG) ENSMUSG00000046447	false
8247	TF-TG	ENSMUSG00000022479 (TF-TG) ENSMUSG00000042096	false
24628	TF-TG	ENSMUSG00000025025 (TF-TG) ENSMUSG00000047139	false
8244	TF-TG	ENSMUSG00000022479 (TF-TG) ENSMUSG00000042035	false
24627	TF-TG	ENSMUSG00000025025 (TF-TG) ENSMUSG00000046814	false
12339	TF-TG	ENSMUSG00000017950 (TF-TG) ENSMUSG00000046070	false
24625	TF-TG	ENSMUSG00000025025 (TF-TG) ENSMUSG00000046546	false
12337	TF-TG	ENSMUSG00000017950 (TF-TG) ENSMUSG00000045667	false
12336	TF-TG	ENSMUSG00000017950 (TF-TG) ENSMUSG00000045629	false
8240	TF-TG	ENSMUSG00000022479 (TF-TG) ENSMUSG00000041930	false
24623	TF-TG	ENSMUSG00000025025 (TF-TG) ENSMUSG00000046295	false
12335	TF-TG	ENSMUSG00000017950 (TF-TG) ENSMUSG00000045382	false
24622	TF-TG	ENSMUSG00000025025 (TF-TG) ENSMUSG00000046070	false
24621	TF-TG	ENSMUSG00000025025 (TF-TG) ENSMUSG00000046058	false
12333	TF-TG	ENSMUSG00000017950 (TF-TG) ENSMUSG00000045094	false
24619	TF-TG	ENSMUSG00000025025 (TF-TG) ENSMUSG00000045382	false
12330	TF-TG	ENSMUSG00000017950 (TF-TG) ENSMUSG00000045007	false
24617	TF-TG	ENSMUSG00000025025 (TF-TG) ENSMUSG00000045349	false
8233	TF-TG	ENSMUSG00000022479 (TF-TG) ENSMUSG00000041733	false
12326	TF-TG	ENSMUSG00000017950 (TF-TG) ENSMUSG00000044674	false
12325	TF-TG	ENSMUSG00000017950 (TF-TG) ENSMUSG00000044646	false
24612	TF-TG	ENSMUSG00000025025 (TF-TG) ENSMUSG00000044072	false
12324	TF-TG	ENSMUSG00000017950 (TF-TG) ENSMUSG00000044456	false
12323	TF-TG	ENSMUSG00000017950 (TF-TG) ENSMUSG00000044072	false
8226	TF-TG	ENSMUSG00000022479 (TF-TG) ENSMUSG00000041548	false
24608	TF-TG	ENSMUSG00000025025 (TF-TG) ENSMUSG00000043004	false
8224	TF-TG	ENSMUSG00000022479 (TF-TG) ENSMUSG00000041431	false
24607	TF-TG	ENSMUSG00000025025 (TF-TG) ENSMUSG00000042797	false
24606	TF-TG	ENSMUSG00000025025 (TF-TG) ENSMUSG00000042647	false
8221	TF-TG	ENSMUSG00000022479 (TF-TG) ENSMUSG00000041237	false
12316	TF-TG	ENSMUSG00000017950 (TF-TG) ENSMUSG00000043068	false
8220	TF-TG	ENSMUSG00000022479 (TF-TG) ENSMUSG00000041219	false
8219	TF-TG	ENSMUSG00000022479 (TF-TG) ENSMUSG00000041202	false
12314	TF-TG	ENSMUSG00000017950 (TF-TG) ENSMUSG00000042797	false
24601	TF-TG	ENSMUSG00000025025 (TF-TG) ENSMUSG00000041930	false
12313	TF-TG	ENSMUSG00000017950 (TF-TG) ENSMUSG00000042647	false
24600	TF-TG	ENSMUSG00000025025 (TF-TG) ENSMUSG00000041733	false
12309	TF-TG	ENSMUSG00000017950 (TF-TG) ENSMUSG00000042333	false
24596	TF-TG	ENSMUSG00000025025 (TF-TG) ENSMUSG00000041431	false
12308	TF-TG	ENSMUSG00000017950 (TF-TG) ENSMUSG00000042303	false
24595	TF-TG	ENSMUSG00000025025 (TF-TG) ENSMUSG00000041268	false
24594	TF-TG	ENSMUSG00000025025 (TF-TG) ENSMUSG00000041237	false
12306	TF-TG	ENSMUSG00000017950 (TF-TG) ENSMUSG00000042195	false
8210	TF-TG	ENSMUSG00000022479 (TF-TG) ENSMUSG00000041064	false
24593	TF-TG	ENSMUSG00000025025 (TF-TG) ENSMUSG00000041219	false
12305	TF-TG	ENSMUSG00000017950 (TF-TG) ENSMUSG00000042179	false
8209	TF-TG	ENSMUSG00000022479 (TF-TG) ENSMUSG00000041058	false
12304	TF-TG	ENSMUSG00000017950 (TF-TG) ENSMUSG00000042115	false
8208	TF-TG	ENSMUSG00000022479 (TF-TG) ENSMUSG00000041040	false
12303	TF-TG	ENSMUSG00000017950 (TF-TG) ENSMUSG00000042109	false
8206	TF-TG	ENSMUSG00000022479 (TF-TG) ENSMUSG00000040998	false
24589	TF-TG	ENSMUSG00000025025 (TF-TG) ENSMUSG00000041064	false
8204	TF-TG	ENSMUSG00000022479 (TF-TG) ENSMUSG00000040918	false
24587	TF-TG	ENSMUSG00000025025 (TF-TG) ENSMUSG00000041058	false
8203	TF-TG	ENSMUSG00000022479 (TF-TG) ENSMUSG00000040852	false
24586	TF-TG	ENSMUSG00000025025 (TF-TG) ENSMUSG00000041040	false
12297	TF-TG	ENSMUSG00000017950 (TF-TG) ENSMUSG00000041930	false
24584	TF-TG	ENSMUSG00000025025 (TF-TG) ENSMUSG00000040631	false
24582	TF-TG	ENSMUSG00000025025 (TF-TG) ENSMUSG00000040447	false
8198	TF-TG	ENSMUSG00000022479 (TF-TG) ENSMUSG00000040640	false
24581	TF-TG	ENSMUSG00000025025 (TF-TG) ENSMUSG00000040433	false
8197	TF-TG	ENSMUSG00000022479 (TF-TG) ENSMUSG00000040631	false
24580	TF-TG	ENSMUSG00000025025 (TF-TG) ENSMUSG00000040430	false
12291	TF-TG	ENSMUSG00000017950 (TF-TG) ENSMUSG00000041548	false
8195	TF-TG	ENSMUSG00000022479 (TF-TG) ENSMUSG00000040605	false
24578	TF-TG	ENSMUSG00000025025 (TF-TG) ENSMUSG00000040345	false
12290	TF-TG	ENSMUSG00000017950 (TF-TG) ENSMUSG00000041268	false
24577	TF-TG	ENSMUSG00000025025 (TF-TG) ENSMUSG00000040280	false
12289	TF-TG	ENSMUSG00000017950 (TF-TG) ENSMUSG00000041237	false
12288	TF-TG	ENSMUSG00000017950 (TF-TG) ENSMUSG00000041202	false
8191	TF-TG	ENSMUSG00000022479 (TF-TG) ENSMUSG00000040462	false
8190	TF-TG	ENSMUSG00000022479 (TF-TG) ENSMUSG00000040447	false
24573	TF-TG	ENSMUSG00000025025 (TF-TG) ENSMUSG00000039648	false
8189	TF-TG	ENSMUSG00000022479 (TF-TG) ENSMUSG00000040433	false
8188	TF-TG	ENSMUSG00000022479 (TF-TG) ENSMUSG00000040430	false
24571	TF-TG	ENSMUSG00000025025 (TF-TG) ENSMUSG00000039323	false
12283	TF-TG	ENSMUSG00000017950 (TF-TG) ENSMUSG00000041064	false
12282	TF-TG	ENSMUSG00000017950 (TF-TG) ENSMUSG00000041058	false
12281	TF-TG	ENSMUSG00000017950 (TF-TG) ENSMUSG00000041040	false
8185	TF-TG	ENSMUSG00000022479 (TF-TG) ENSMUSG00000040345	false
12280	TF-TG	ENSMUSG00000017950 (TF-TG) ENSMUSG00000040998	false
24567	TF-TG	ENSMUSG00000025025 (TF-TG) ENSMUSG00000039050	false
12279	TF-TG	ENSMUSG00000017950 (TF-TG) ENSMUSG00000040918	false
8183	TF-TG	ENSMUSG00000022479 (TF-TG) ENSMUSG00000040280	false
24566	TF-TG	ENSMUSG00000025025 (TF-TG) ENSMUSG00000038777	false
12278	TF-TG	ENSMUSG00000017950 (TF-TG) ENSMUSG00000040852	false
24564	TF-TG	ENSMUSG00000025025 (TF-TG) ENSMUSG00000038599	false
12276	TF-TG	ENSMUSG00000017950 (TF-TG) ENSMUSG00000040631	false
12275	TF-TG	ENSMUSG00000017950 (TF-TG) ENSMUSG00000040605	false
24562	TF-TG	ENSMUSG00000025025 (TF-TG) ENSMUSG00000038451	false
8176	TF-TG	ENSMUSG00000022479 (TF-TG) ENSMUSG00000040127	false
12271	TF-TG	ENSMUSG00000017950 (TF-TG) ENSMUSG00000040433	false
24558	TF-TG	ENSMUSG00000025025 (TF-TG) ENSMUSG00000038042	false
24554	TF-TG	ENSMUSG00000025025 (TF-TG) ENSMUSG00000037820	false
8170	TF-TG	ENSMUSG00000022479 (TF-TG) ENSMUSG00000039943	false
24553	TF-TG	ENSMUSG00000025025 (TF-TG) ENSMUSG00000037664	false
8169	TF-TG	ENSMUSG00000022479 (TF-TG) ENSMUSG00000039934	false
24552	TF-TG	ENSMUSG00000025025 (TF-TG) ENSMUSG00000037621	false
12264	TF-TG	ENSMUSG00000017950 (TF-TG) ENSMUSG00000040127	false
8168	TF-TG	ENSMUSG00000022479 (TF-TG) ENSMUSG00000039911	false
24551	TF-TG	ENSMUSG00000025025 (TF-TG) ENSMUSG00000037606	false
12263	TF-TG	ENSMUSG00000017950 (TF-TG) ENSMUSG00000040084	false
24550	TF-TG	ENSMUSG00000025025 (TF-TG) ENSMUSG00000037583	false
24547	TF-TG	ENSMUSG00000025025 (TF-TG) ENSMUSG00000037235	false
12258	TF-TG	ENSMUSG00000017950 (TF-TG) ENSMUSG00000039934	false
8162	TF-TG	ENSMUSG00000022479 (TF-TG) ENSMUSG00000039683	false
24545	TF-TG	ENSMUSG00000025025 (TF-TG) ENSMUSG00000037071	false
8160	TF-TG	ENSMUSG00000022479 (TF-TG) ENSMUSG00000039648	false
24542	TF-TG	ENSMUSG00000025025 (TF-TG) ENSMUSG00000036880	false
8158	TF-TG	ENSMUSG00000022479 (TF-TG) ENSMUSG00000039616	false
12253	TF-TG	ENSMUSG00000017950 (TF-TG) ENSMUSG00000039648	false
12250	TF-TG	ENSMUSG00000017950 (TF-TG) ENSMUSG00000039323	false
8153	TF-TG	ENSMUSG00000022479 (TF-TG) ENSMUSG00000039470	false
24535	TF-TG	ENSMUSG00000025025 (TF-TG) ENSMUSG00000035711	false
24534	TF-TG	ENSMUSG00000025025 (TF-TG) ENSMUSG00000035561	false
24533	TF-TG	ENSMUSG00000025025 (TF-TG) ENSMUSG00000035441	false
8149	TF-TG	ENSMUSG00000022479 (TF-TG) ENSMUSG00000039323	false
12244	TF-TG	ENSMUSG00000017950 (TF-TG) ENSMUSG00000039114	false
12243	TF-TG	ENSMUSG00000017950 (TF-TG) ENSMUSG00000039050	false
24530	TF-TG	ENSMUSG00000025025 (TF-TG) ENSMUSG00000035158	false
12241	TF-TG	ENSMUSG00000017950 (TF-TG) ENSMUSG00000038903	false
8145	TF-TG	ENSMUSG00000022479 (TF-TG) ENSMUSG00000039232	false
24528	TF-TG	ENSMUSG00000025025 (TF-TG) ENSMUSG00000034858	false
12240	TF-TG	ENSMUSG00000017950 (TF-TG) ENSMUSG00000038884	false
12239	TF-TG	ENSMUSG00000017950 (TF-TG) ENSMUSG00000038843	false
24526	TF-TG	ENSMUSG00000025025 (TF-TG) ENSMUSG00000034768	false
12236	TF-TG	ENSMUSG00000017950 (TF-TG) ENSMUSG00000038745	false
8140	TF-TG	ENSMUSG00000022479 (TF-TG) ENSMUSG00000039158	false
12235	TF-TG	ENSMUSG00000017950 (TF-TG) ENSMUSG00000038599	false
24522	TF-TG	ENSMUSG00000025025 (TF-TG) ENSMUSG00000034413	false
8137	TF-TG	ENSMUSG00000022479 (TF-TG) ENSMUSG00000039126	false
24520	TF-TG	ENSMUSG00000025025 (TF-TG) ENSMUSG00000034265	false
12232	TF-TG	ENSMUSG00000017950 (TF-TG) ENSMUSG00000038463	false
12231	TF-TG	ENSMUSG00000017950 (TF-TG) ENSMUSG00000038451	false
8135	TF-TG	ENSMUSG00000022479 (TF-TG) ENSMUSG00000039114	false
12230	TF-TG	ENSMUSG00000017950 (TF-TG) ENSMUSG00000038379	false
8134	TF-TG	ENSMUSG00000022479 (TF-TG) ENSMUSG00000039087	false
24517	TF-TG	ENSMUSG00000025025 (TF-TG) ENSMUSG00000034116	false
12229	TF-TG	ENSMUSG00000017950 (TF-TG) ENSMUSG00000038371	false
8132	TF-TG	ENSMUSG00000022479 (TF-TG) ENSMUSG00000039050	false
24515	TF-TG	ENSMUSG00000025025 (TF-TG) ENSMUSG00000033917	false
24513	TF-TG	ENSMUSG00000025025 (TF-TG) ENSMUSG00000033685	false
12225	TF-TG	ENSMUSG00000017950 (TF-TG) ENSMUSG00000037936	false
12224	TF-TG	ENSMUSG00000017950 (TF-TG) ENSMUSG00000037820	false
12223	TF-TG	ENSMUSG00000017950 (TF-TG) ENSMUSG00000037797	false
24510	TF-TG	ENSMUSG00000025025 (TF-TG) ENSMUSG00000033318	false
8126	TF-TG	ENSMUSG00000022479 (TF-TG) ENSMUSG00000038903	false
24509	TF-TG	ENSMUSG00000025025 (TF-TG) ENSMUSG00000033287	false
8125	TF-TG	ENSMUSG00000022479 (TF-TG) ENSMUSG00000038884	false
24508	TF-TG	ENSMUSG00000025025 (TF-TG) ENSMUSG00000033256	false
24507	TF-TG	ENSMUSG00000025025 (TF-TG) ENSMUSG00000032978	false
8123	TF-TG	ENSMUSG00000022479 (TF-TG) ENSMUSG00000038843	false
8122	TF-TG	ENSMUSG00000022479 (TF-TG) ENSMUSG00000038836	false
12217	TF-TG	ENSMUSG00000017950 (TF-TG) ENSMUSG00000037621	false
8121	TF-TG	ENSMUSG00000022479 (TF-TG) ENSMUSG00000038777	false
24504	TF-TG	ENSMUSG00000025025 (TF-TG) ENSMUSG00000032855	false
24503	TF-TG	ENSMUSG00000025025 (TF-TG) ENSMUSG00000032849	false
8119	TF-TG	ENSMUSG00000022479 (TF-TG) ENSMUSG00000038745	false
24502	TF-TG	ENSMUSG00000025025 (TF-TG) ENSMUSG00000032754	false
12213	TF-TG	ENSMUSG00000017950 (TF-TG) ENSMUSG00000037447	false
24500	TF-TG	ENSMUSG00000025025 (TF-TG) ENSMUSG00000032656	false
24499	TF-TG	ENSMUSG00000025025 (TF-TG) ENSMUSG00000032431	false
24498	TF-TG	ENSMUSG00000025025 (TF-TG) ENSMUSG00000032380	false
12210	TF-TG	ENSMUSG00000017950 (TF-TG) ENSMUSG00000037315	false
24496	TF-TG	ENSMUSG00000025025 (TF-TG) ENSMUSG00000032314	false
12208	TF-TG	ENSMUSG00000017950 (TF-TG) ENSMUSG00000037071	false
8112	TF-TG	ENSMUSG00000022479 (TF-TG) ENSMUSG00000038599	false
12207	TF-TG	ENSMUSG00000017950 (TF-TG) ENSMUSG00000036913	false
24494	TF-TG	ENSMUSG00000025025 (TF-TG) ENSMUSG00000032245	false
24492	TF-TG	ENSMUSG00000025025 (TF-TG) ENSMUSG00000032026	false
12204	TF-TG	ENSMUSG00000017950 (TF-TG) ENSMUSG00000036887	false
24491	TF-TG	ENSMUSG00000025025 (TF-TG) ENSMUSG00000032018	false
12203	TF-TG	ENSMUSG00000017950 (TF-TG) ENSMUSG00000036880	false
8107	TF-TG	ENSMUSG00000022479 (TF-TG) ENSMUSG00000038486	false
24490	TF-TG	ENSMUSG00000025025 (TF-TG) ENSMUSG00000032014	false
12202	TF-TG	ENSMUSG00000017950 (TF-TG) ENSMUSG00000036863	false
8106	TF-TG	ENSMUSG00000022479 (TF-TG) ENSMUSG00000038463	false
12201	TF-TG	ENSMUSG00000017950 (TF-TG) ENSMUSG00000036813	false
24488	TF-TG	ENSMUSG00000025025 (TF-TG) ENSMUSG00000031903	false
12200	TF-TG	ENSMUSG00000017950 (TF-TG) ENSMUSG00000036437	false
8104	TF-TG	ENSMUSG00000022479 (TF-TG) ENSMUSG00000038451	false
12199	TF-TG	ENSMUSG00000017950 (TF-TG) ENSMUSG00000036368	false
8103	TF-TG	ENSMUSG00000022479 (TF-TG) ENSMUSG00000038422	false
8102	TF-TG	ENSMUSG00000022479 (TF-TG) ENSMUSG00000038379	false
12197	TF-TG	ENSMUSG00000017950 (TF-TG) ENSMUSG00000036216	false
8101	TF-TG	ENSMUSG00000022479 (TF-TG) ENSMUSG00000038371	false
24484	TF-TG	ENSMUSG00000025025 (TF-TG) ENSMUSG00000031538	false
8099	TF-TG	ENSMUSG00000022479 (TF-TG) ENSMUSG00000038349	false
24482	TF-TG	ENSMUSG00000025025 (TF-TG) ENSMUSG00000031453	false
12194	TF-TG	ENSMUSG00000017950 (TF-TG) ENSMUSG00000036123	false
24481	TF-TG	ENSMUSG00000025025 (TF-TG) ENSMUSG00000030762	false
24479	TF-TG	ENSMUSG00000025025 (TF-TG) ENSMUSG00000030717	false
24476	TF-TG	ENSMUSG00000025025 (TF-TG) ENSMUSG00000030528	false
12187	TF-TG	ENSMUSG00000017950 (TF-TG) ENSMUSG00000035711	false
8091	TF-TG	ENSMUSG00000022479 (TF-TG) ENSMUSG00000038175	false
8089	TF-TG	ENSMUSG00000022479 (TF-TG) ENSMUSG00000038042	false
24472	TF-TG	ENSMUSG00000025025 (TF-TG) ENSMUSG00000029847	false
12184	TF-TG	ENSMUSG00000017950 (TF-TG) ENSMUSG00000035561	false
24471	TF-TG	ENSMUSG00000025025 (TF-TG) ENSMUSG00000029814	false
24470	TF-TG	ENSMUSG00000025025 (TF-TG) ENSMUSG00000029772	false
24469	TF-TG	ENSMUSG00000025025 (TF-TG) ENSMUSG00000029769	false
12181	TF-TG	ENSMUSG00000017950 (TF-TG) ENSMUSG00000035441	false
24468	TF-TG	ENSMUSG00000025025 (TF-TG) ENSMUSG00000029560	false
24466	TF-TG	ENSMUSG00000025025 (TF-TG) ENSMUSG00000029470	false
12178	TF-TG	ENSMUSG00000017950 (TF-TG) ENSMUSG00000035357	false
24464	TF-TG	ENSMUSG00000025025 (TF-TG) ENSMUSG00000029370	false
12176	TF-TG	ENSMUSG00000017950 (TF-TG) ENSMUSG00000035105	false
8080	TF-TG	ENSMUSG00000022479 (TF-TG) ENSMUSG00000037936	false
24462	TF-TG	ENSMUSG00000025025 (TF-TG) ENSMUSG00000029177	false
12173	TF-TG	ENSMUSG00000017950 (TF-TG) ENSMUSG00000034858	false
8076	TF-TG	ENSMUSG00000022479 (TF-TG) ENSMUSG00000037820	false
8075	TF-TG	ENSMUSG00000022479 (TF-TG) ENSMUSG00000037797	false
24457	TF-TG	ENSMUSG00000025025 (TF-TG) ENSMUSG00000028943	false
12169	TF-TG	ENSMUSG00000017950 (TF-TG) ENSMUSG00000034773	false
12168	TF-TG	ENSMUSG00000017950 (TF-TG) ENSMUSG00000034687	false
12167	TF-TG	ENSMUSG00000017950 (TF-TG) ENSMUSG00000034579	false
24452	TF-TG	ENSMUSG00000025025 (TF-TG) ENSMUSG00000028614	false
8068	TF-TG	ENSMUSG00000022479 (TF-TG) ENSMUSG00000037664	false
24451	TF-TG	ENSMUSG00000025025 (TF-TG) ENSMUSG00000028602	false
12163	TF-TG	ENSMUSG00000017950 (TF-TG) ENSMUSG00000034413	false
24450	TF-TG	ENSMUSG00000025025 (TF-TG) ENSMUSG00000028576	false
24449	TF-TG	ENSMUSG00000025025 (TF-TG) ENSMUSG00000028555	false
8065	TF-TG	ENSMUSG00000022479 (TF-TG) ENSMUSG00000037624	false
24448	TF-TG	ENSMUSG00000025025 (TF-TG) ENSMUSG00000028542	false
8064	TF-TG	ENSMUSG00000022479 (TF-TG) ENSMUSG00000037621	false
24447	TF-TG	ENSMUSG00000025025 (TF-TG) ENSMUSG00000028415	false
12159	TF-TG	ENSMUSG00000017950 (TF-TG) ENSMUSG00000034265	false
24446	TF-TG	ENSMUSG00000025025 (TF-TG) ENSMUSG00000028341	false
8062	TF-TG	ENSMUSG00000022479 (TF-TG) ENSMUSG00000037606	false
24445	TF-TG	ENSMUSG00000025025 (TF-TG) ENSMUSG00000028327	false
12157	TF-TG	ENSMUSG00000017950 (TF-TG) ENSMUSG00000034116	false
8061	TF-TG	ENSMUSG00000022479 (TF-TG) ENSMUSG00000037583	false
24444	TF-TG	ENSMUSG00000025025 (TF-TG) ENSMUSG00000028211	false
8060	TF-TG	ENSMUSG00000022479 (TF-TG) ENSMUSG00000037579	false
12155	TF-TG	ENSMUSG00000017950 (TF-TG) ENSMUSG00000033917	false
24442	TF-TG	ENSMUSG00000025025 (TF-TG) ENSMUSG00000027746	false
24441	TF-TG	ENSMUSG00000025025 (TF-TG) ENSMUSG00000027737	false
12152	TF-TG	ENSMUSG00000017950 (TF-TG) ENSMUSG00000033871	false
12151	TF-TG	ENSMUSG00000017950 (TF-TG) ENSMUSG00000033685	false
8055	TF-TG	ENSMUSG00000022479 (TF-TG) ENSMUSG00000037447	false
24438	TF-TG	ENSMUSG00000025025 (TF-TG) ENSMUSG00000027514	false
12150	TF-TG	ENSMUSG00000017950 (TF-TG) ENSMUSG00000033610	false
12148	TF-TG	ENSMUSG00000017950 (TF-TG) ENSMUSG00000033530	false
24435	TF-TG	ENSMUSG00000025025 (TF-TG) ENSMUSG00000027316	false
8051	TF-TG	ENSMUSG00000022479 (TF-TG) ENSMUSG00000037386	false
24434	TF-TG	ENSMUSG00000025025 (TF-TG) ENSMUSG00000027313	false
8050	TF-TG	ENSMUSG00000022479 (TF-TG) ENSMUSG00000037379	false
24433	TF-TG	ENSMUSG00000025025 (TF-TG) ENSMUSG00000027006	false
12145	TF-TG	ENSMUSG00000017950 (TF-TG) ENSMUSG00000033318	false
24432	TF-TG	ENSMUSG00000025025 (TF-TG) ENSMUSG00000026980	false
8048	TF-TG	ENSMUSG00000022479 (TF-TG) ENSMUSG00000037315	false
24431	TF-TG	ENSMUSG00000025025 (TF-TG) ENSMUSG00000026921	false
12143	TF-TG	ENSMUSG00000017950 (TF-TG) ENSMUSG00000033287	false
8047	TF-TG	ENSMUSG00000022479 (TF-TG) ENSMUSG00000037235	false
24430	TF-TG	ENSMUSG00000025025 (TF-TG) ENSMUSG00000026820	false
12142	TF-TG	ENSMUSG00000017950 (TF-TG) ENSMUSG00000033256	false
12141	TF-TG	ENSMUSG00000017950 (TF-TG) ENSMUSG00000033177	false
24428	TF-TG	ENSMUSG00000025025 (TF-TG) ENSMUSG00000026782	false
12140	TF-TG	ENSMUSG00000017950 (TF-TG) ENSMUSG00000033107	false
8044	TF-TG	ENSMUSG00000022479 (TF-TG) ENSMUSG00000037169	false
12139	TF-TG	ENSMUSG00000017950 (TF-TG) ENSMUSG00000033105	false
12138	TF-TG	ENSMUSG00000017950 (TF-TG) ENSMUSG00000032978	false
24425	TF-TG	ENSMUSG00000025025 (TF-TG) ENSMUSG00000026649	false
8041	TF-TG	ENSMUSG00000022479 (TF-TG) ENSMUSG00000037071	false
24423	TF-TG	ENSMUSG00000025025 (TF-TG) ENSMUSG00000026605	false
8037	TF-TG	ENSMUSG00000022479 (TF-TG) ENSMUSG00000036944	false
12132	TF-TG	ENSMUSG00000017950 (TF-TG) ENSMUSG00000032855	false
12131	TF-TG	ENSMUSG00000017950 (TF-TG) ENSMUSG00000032849	false
24418	TF-TG	ENSMUSG00000025025 (TF-TG) ENSMUSG00000026170	false
12129	TF-TG	ENSMUSG00000017950 (TF-TG) ENSMUSG00000032754	false
8033	TF-TG	ENSMUSG00000022479 (TF-TG) ENSMUSG00000036887	false
24416	TF-TG	ENSMUSG00000025025 (TF-TG) ENSMUSG00000026107	false
12128	TF-TG	ENSMUSG00000017950 (TF-TG) ENSMUSG00000032733	false
8032	TF-TG	ENSMUSG00000022479 (TF-TG) ENSMUSG00000036880	false
24415	TF-TG	ENSMUSG00000025025 (TF-TG) ENSMUSG00000026072	false
8031	TF-TG	ENSMUSG00000022479 (TF-TG) ENSMUSG00000036863	false
8029	TF-TG	ENSMUSG00000022479 (TF-TG) ENSMUSG00000036813	false
24412	TF-TG	ENSMUSG00000025025 (TF-TG) ENSMUSG00000025758	false
12121	TF-TG	ENSMUSG00000017950 (TF-TG) ENSMUSG00000032411	false
12120	TF-TG	ENSMUSG00000017950 (TF-TG) ENSMUSG00000032380	false
8023	TF-TG	ENSMUSG00000022479 (TF-TG) ENSMUSG00000036526	false
24406	TF-TG	ENSMUSG00000025025 (TF-TG) ENSMUSG00000025279	false
24405	TF-TG	ENSMUSG00000025025 (TF-TG) ENSMUSG00000025203	false
8021	TF-TG	ENSMUSG00000022479 (TF-TG) ENSMUSG00000036437	false
24404	TF-TG	ENSMUSG00000025025 (TF-TG) ENSMUSG00000025176	false
8020	TF-TG	ENSMUSG00000022479 (TF-TG) ENSMUSG00000036368	false
12115	TF-TG	ENSMUSG00000017950 (TF-TG) ENSMUSG00000032294	false
12114	TF-TG	ENSMUSG00000017950 (TF-TG) ENSMUSG00000032245	false
24399	TF-TG	ENSMUSG00000025025 (TF-TG) ENSMUSG00000024665	false
8014	TF-TG	ENSMUSG00000022479 (TF-TG) ENSMUSG00000036216	false
24396	TF-TG	ENSMUSG00000025025 (TF-TG) ENSMUSG00000024525	false
8012	TF-TG	ENSMUSG00000022479 (TF-TG) ENSMUSG00000036123	false
12106	TF-TG	ENSMUSG00000017950 (TF-TG) ENSMUSG00000032018	false
24393	TF-TG	ENSMUSG00000025025 (TF-TG) ENSMUSG00000024013	false
12105	TF-TG	ENSMUSG00000017950 (TF-TG) ENSMUSG00000032014	false
12103	TF-TG	ENSMUSG00000017950 (TF-TG) ENSMUSG00000031980	false
12102	TF-TG	ENSMUSG00000017950 (TF-TG) ENSMUSG00000031957	false
8006	TF-TG	ENSMUSG00000022479 (TF-TG) ENSMUSG00000035901	false
12100	TF-TG	ENSMUSG00000017950 (TF-TG) ENSMUSG00000031903	false
12098	TF-TG	ENSMUSG00000017950 (TF-TG) ENSMUSG00000031891	false
24385	TF-TG	ENSMUSG00000025025 (TF-TG) ENSMUSG00000023043	false
24384	TF-TG	ENSMUSG00000025025 (TF-TG) ENSMUSG00000023032	false
24383	TF-TG	ENSMUSG00000025025 (TF-TG) ENSMUSG00000023017	false
12094	TF-TG	ENSMUSG00000017950 (TF-TG) ENSMUSG00000031827	false
24381	TF-TG	ENSMUSG00000025025 (TF-TG) ENSMUSG00000022947	false
12093	TF-TG	ENSMUSG00000017950 (TF-TG) ENSMUSG00000031791	false
24380	TF-TG	ENSMUSG00000025025 (TF-TG) ENSMUSG00000022938	false
7996	TF-TG	ENSMUSG00000022479 (TF-TG) ENSMUSG00000035683	false
24379	TF-TG	ENSMUSG00000025025 (TF-TG) ENSMUSG00000022864	false
12089	TF-TG	ENSMUSG00000017950 (TF-TG) ENSMUSG00000031765	false
12088	TF-TG	ENSMUSG00000017950 (TF-TG) ENSMUSG00000031725	false
7992	TF-TG	ENSMUSG00000022479 (TF-TG) ENSMUSG00000035561	false
12087	TF-TG	ENSMUSG00000017950 (TF-TG) ENSMUSG00000031668	false
24372	TF-TG	ENSMUSG00000025025 (TF-TG) ENSMUSG00000022364	false
7987	TF-TG	ENSMUSG00000022479 (TF-TG) ENSMUSG00000035441	false
24370	TF-TG	ENSMUSG00000025025 (TF-TG) ENSMUSG00000022148	false
12082	TF-TG	ENSMUSG00000017950 (TF-TG) ENSMUSG00000031538	false
24369	TF-TG	ENSMUSG00000025025 (TF-TG) ENSMUSG00000022136	false
12081	TF-TG	ENSMUSG00000017950 (TF-TG) ENSMUSG00000031520	false
7984	TF-TG	ENSMUSG00000022479 (TF-TG) ENSMUSG00000035357	false
24367	TF-TG	ENSMUSG00000025025 (TF-TG) ENSMUSG00000022094	false
12079	TF-TG	ENSMUSG00000017950 (TF-TG) ENSMUSG00000031375	false
24364	TF-TG	ENSMUSG00000025025 (TF-TG) ENSMUSG00000021876	false
7980	TF-TG	ENSMUSG00000022479 (TF-TG) ENSMUSG00000035239	false
24363	TF-TG	ENSMUSG00000025025 (TF-TG) ENSMUSG00000021806	false
12071	TF-TG	ENSMUSG00000017950 (TF-TG) ENSMUSG00000030769	false
24358	TF-TG	ENSMUSG00000025025 (TF-TG) ENSMUSG00000021453	false
12070	TF-TG	ENSMUSG00000017950 (TF-TG) ENSMUSG00000030762	false
7974	TF-TG	ENSMUSG00000022479 (TF-TG) ENSMUSG00000035158	false
7972	TF-TG	ENSMUSG00000022479 (TF-TG) ENSMUSG00000035105	false
24355	TF-TG	ENSMUSG00000025025 (TF-TG) ENSMUSG00000021221	false
12067	TF-TG	ENSMUSG00000017950 (TF-TG) ENSMUSG00000030717	false
24354	TF-TG	ENSMUSG00000025025 (TF-TG) ENSMUSG00000021196	false
12066	TF-TG	ENSMUSG00000017950 (TF-TG) ENSMUSG00000030543	false
7969	TF-TG	ENSMUSG00000022479 (TF-TG) ENSMUSG00000034858	false
24351	TF-TG	ENSMUSG00000025025 (TF-TG) ENSMUSG00000020894	false
12062	TF-TG	ENSMUSG00000017950 (TF-TG) ENSMUSG00000030329	false
24349	TF-TG	ENSMUSG00000025025 (TF-TG) ENSMUSG00000020872	false
12060	TF-TG	ENSMUSG00000017950 (TF-TG) ENSMUSG00000030155	false
7964	TF-TG	ENSMUSG00000022479 (TF-TG) ENSMUSG00000034773	false
7963	TF-TG	ENSMUSG00000022479 (TF-TG) ENSMUSG00000034768	false
24346	TF-TG	ENSMUSG00000025025 (TF-TG) ENSMUSG00000020741	false
7961	TF-TG	ENSMUSG00000022479 (TF-TG) ENSMUSG00000034687	false
12056	TF-TG	ENSMUSG00000017950 (TF-TG) ENSMUSG00000030048	false
7960	TF-TG	ENSMUSG00000022479 (TF-TG) ENSMUSG00000034684	false
24343	TF-TG	ENSMUSG00000025025 (TF-TG) ENSMUSG00000020471	false
24341	TF-TG	ENSMUSG00000025025 (TF-TG) ENSMUSG00000020435	false
24340	TF-TG	ENSMUSG00000025025 (TF-TG) ENSMUSG00000020402	false
12052	TF-TG	ENSMUSG00000017950 (TF-TG) ENSMUSG00000029772	false
24339	TF-TG	ENSMUSG00000025025 (TF-TG) ENSMUSG00000020376	false
12051	TF-TG	ENSMUSG00000017950 (TF-TG) ENSMUSG00000029769	false
24338	TF-TG	ENSMUSG00000025025 (TF-TG) ENSMUSG00000020277	false
7954	TF-TG	ENSMUSG00000022479 (TF-TG) ENSMUSG00000034579	false
24337	TF-TG	ENSMUSG00000025025 (TF-TG) ENSMUSG00000020261	false
12049	TF-TG	ENSMUSG00000017950 (TF-TG) ENSMUSG00000029674	false
12047	TF-TG	ENSMUSG00000017950 (TF-TG) ENSMUSG00000029522	false
24334	TF-TG	ENSMUSG00000025025 (TF-TG) ENSMUSG00000020034	false
12046	TF-TG	ENSMUSG00000017950 (TF-TG) ENSMUSG00000029470	false
24333	TF-TG	ENSMUSG00000025025 (TF-TG) ENSMUSG00000020015	false
24332	TF-TG	ENSMUSG00000025025 (TF-TG) ENSMUSG00000020014	false
12044	TF-TG	ENSMUSG00000017950 (TF-TG) ENSMUSG00000029370	false
7948	TF-TG	ENSMUSG00000022479 (TF-TG) ENSMUSG00000034413	false
24331	TF-TG	ENSMUSG00000025025 (TF-TG) ENSMUSG00000020009	false
24330	TF-TG	ENSMUSG00000025025 (TF-TG) ENSMUSG00000019916	false
12042	TF-TG	ENSMUSG00000017950 (TF-TG) ENSMUSG00000029330	false
24329	TF-TG	ENSMUSG00000025025 (TF-TG) ENSMUSG00000019564	false
24326	TF-TG	ENSMUSG00000025025 (TF-TG) ENSMUSG00000018334	false
7941	TF-TG	ENSMUSG00000022479 (TF-TG) ENSMUSG00000034265	false
12036	TF-TG	ENSMUSG00000017950 (TF-TG) ENSMUSG00000029177	false
24323	TF-TG	ENSMUSG00000025025 (TF-TG) ENSMUSG00000017692	false
12035	TF-TG	ENSMUSG00000017950 (TF-TG) ENSMUSG00000029173	false
24322	TF-TG	ENSMUSG00000025025 (TF-TG) ENSMUSG00000017652	false
24321	TF-TG	ENSMUSG00000025025 (TF-TG) ENSMUSG00000017446	false
7937	TF-TG	ENSMUSG00000022479 (TF-TG) ENSMUSG00000034116	false
12032	TF-TG	ENSMUSG00000017950 (TF-TG) ENSMUSG00000029161	false
24319	TF-TG	ENSMUSG00000025025 (TF-TG) ENSMUSG00000017165	false
7933	TF-TG	ENSMUSG00000022479 (TF-TG) ENSMUSG00000033917	false
12027	TF-TG	ENSMUSG00000017950 (TF-TG) ENSMUSG00000028874	false
7931	TF-TG	ENSMUSG00000022479 (TF-TG) ENSMUSG00000033871	false
24314	TF-TG	ENSMUSG00000025025 (TF-TG) ENSMUSG00000015745	false
24313	TF-TG	ENSMUSG00000025025 (TF-TG) ENSMUSG00000015396	false
12024	TF-TG	ENSMUSG00000017950 (TF-TG) ENSMUSG00000028649	false
24311	TF-TG	ENSMUSG00000025025 (TF-TG) ENSMUSG00000014303	false
12023	TF-TG	ENSMUSG00000017950 (TF-TG) ENSMUSG00000028634	false
12022	TF-TG	ENSMUSG00000017950 (TF-TG) ENSMUSG00000028614	false
7926	TF-TG	ENSMUSG00000022479 (TF-TG) ENSMUSG00000033685	false
12021	TF-TG	ENSMUSG00000017950 (TF-TG) ENSMUSG00000028542	false
12019	TF-TG	ENSMUSG00000017950 (TF-TG) ENSMUSG00000028517	false
7923	TF-TG	ENSMUSG00000022479 (TF-TG) ENSMUSG00000033610	false
24306	TF-TG	ENSMUSG00000025025 (TF-TG) ENSMUSG00000012126	false
12018	TF-TG	ENSMUSG00000017950 (TF-TG) ENSMUSG00000028415	false
24304	TF-TG	ENSMUSG00000025025 (TF-TG) ENSMUSG00000011148	false
24303	TF-TG	ENSMUSG00000025025 (TF-TG) ENSMUSG00000010362	false
24302	TF-TG	ENSMUSG00000025025 (TF-TG) ENSMUSG00000010122	false
7918	TF-TG	ENSMUSG00000022479 (TF-TG) ENSMUSG00000033530	false
24301	TF-TG	ENSMUSG00000025025 (TF-TG) ENSMUSG00000009739	false
12013	TF-TG	ENSMUSG00000017950 (TF-TG) ENSMUSG00000028211	false
12012	TF-TG	ENSMUSG00000017950 (TF-TG) ENSMUSG00000028186	false
7915	TF-TG	ENSMUSG00000022479 (TF-TG) ENSMUSG00000033318	false
24297	TF-TG	ENSMUSG00000025025 (TF-TG) ENSMUSG00000005413	false
12008	TF-TG	ENSMUSG00000017950 (TF-TG) ENSMUSG00000028076	false
24295	TF-TG	ENSMUSG00000025025 (TF-TG) ENSMUSG00000004880	false
7911	TF-TG	ENSMUSG00000022479 (TF-TG) ENSMUSG00000033256	false
24294	TF-TG	ENSMUSG00000025025 (TF-TG) ENSMUSG00000004328	false
24293	TF-TG	ENSMUSG00000025025 (TF-TG) ENSMUSG00000004044	false
7909	TF-TG	ENSMUSG00000022479 (TF-TG) ENSMUSG00000033209	false
12004	TF-TG	ENSMUSG00000017950 (TF-TG) ENSMUSG00000027954	false
7908	TF-TG	ENSMUSG00000022479 (TF-TG) ENSMUSG00000033177	false
12003	TF-TG	ENSMUSG00000017950 (TF-TG) ENSMUSG00000027907	false
7907	TF-TG	ENSMUSG00000022479 (TF-TG) ENSMUSG00000033161	false
12002	TF-TG	ENSMUSG00000017950 (TF-TG) ENSMUSG00000027883	false
24289	TF-TG	ENSMUSG00000025025 (TF-TG) ENSMUSG00000002997	false
7905	TF-TG	ENSMUSG00000022479 (TF-TG) ENSMUSG00000033147	false
7904	TF-TG	ENSMUSG00000022479 (TF-TG) ENSMUSG00000033107	false
7903	TF-TG	ENSMUSG00000022479 (TF-TG) ENSMUSG00000033105	false
24286	TF-TG	ENSMUSG00000025025 (TF-TG) ENSMUSG00000001467	false
7902	TF-TG	ENSMUSG00000022479 (TF-TG) ENSMUSG00000033083	false
24285	TF-TG	ENSMUSG00000025025 (TF-TG) ENSMUSG00000000791	false
11997	TF-TG	ENSMUSG00000017950 (TF-TG) ENSMUSG00000027750	false
11996	TF-TG	ENSMUSG00000017950 (TF-TG) ENSMUSG00000027746	false
24283	TF-TG	ENSMUSG00000025025 (TF-TG) ENSMUSG00000000125	false
7899	TF-TG	ENSMUSG00000022479 (TF-TG) ENSMUSG00000032978	false
11990	TF-TG	ENSMUSG00000017950 (TF-TG) ENSMUSG00000027534	false
7894	TF-TG	ENSMUSG00000022479 (TF-TG) ENSMUSG00000032855	false
11989	TF-TG	ENSMUSG00000017950 (TF-TG) ENSMUSG00000027514	false
7891	TF-TG	ENSMUSG00000022479 (TF-TG) ENSMUSG00000032849	false
7889	TF-TG	ENSMUSG00000022479 (TF-TG) ENSMUSG00000032783	false
7887	TF-TG	ENSMUSG00000022479 (TF-TG) ENSMUSG00000032754	false
7886	TF-TG	ENSMUSG00000022479 (TF-TG) ENSMUSG00000032740	false
11981	TF-TG	ENSMUSG00000017950 (TF-TG) ENSMUSG00000027333	false
7882	TF-TG	ENSMUSG00000022479 (TF-TG) ENSMUSG00000032656	false
11976	TF-TG	ENSMUSG00000017950 (TF-TG) ENSMUSG00000027173	false
11973	TF-TG	ENSMUSG00000017950 (TF-TG) ENSMUSG00000027068	false
11972	TF-TG	ENSMUSG00000017950 (TF-TG) ENSMUSG00000027006	false
11970	TF-TG	ENSMUSG00000017950 (TF-TG) ENSMUSG00000026980	false
11967	TF-TG	ENSMUSG00000017950 (TF-TG) ENSMUSG00000026921	false
7871	TF-TG	ENSMUSG00000022479 (TF-TG) ENSMUSG00000032411	false
11966	TF-TG	ENSMUSG00000017950 (TF-TG) ENSMUSG00000026880	false
7870	TF-TG	ENSMUSG00000022479 (TF-TG) ENSMUSG00000032380	false
11964	TF-TG	ENSMUSG00000017950 (TF-TG) ENSMUSG00000026820	false
11963	TF-TG	ENSMUSG00000017950 (TF-TG) ENSMUSG00000026730	false
11959	TF-TG	ENSMUSG00000017950 (TF-TG) ENSMUSG00000026649	false
11957	TF-TG	ENSMUSG00000017950 (TF-TG) ENSMUSG00000026605	false
7861	TF-TG	ENSMUSG00000022479 (TF-TG) ENSMUSG00000032314	false
7859	TF-TG	ENSMUSG00000022479 (TF-TG) ENSMUSG00000032294	false
11954	TF-TG	ENSMUSG00000017950 (TF-TG) ENSMUSG00000026546	false
11953	TF-TG	ENSMUSG00000017950 (TF-TG) ENSMUSG00000026520	false
7857	TF-TG	ENSMUSG00000022479 (TF-TG) ENSMUSG00000032278	false
11952	TF-TG	ENSMUSG00000017950 (TF-TG) ENSMUSG00000026509	false
7855	TF-TG	ENSMUSG00000022479 (TF-TG) ENSMUSG00000032245	false
11950	TF-TG	ENSMUSG00000017950 (TF-TG) ENSMUSG00000026415	false
11949	TF-TG	ENSMUSG00000017950 (TF-TG) ENSMUSG00000026398	false
11943	TF-TG	ENSMUSG00000017950 (TF-TG) ENSMUSG00000026227	false
11941	TF-TG	ENSMUSG00000017950 (TF-TG) ENSMUSG00000026170	false
11939	TF-TG	ENSMUSG00000017950 (TF-TG) ENSMUSG00000026107	false
11938	TF-TG	ENSMUSG00000017950 (TF-TG) ENSMUSG00000026077	false
7842	TF-TG	ENSMUSG00000022479 (TF-TG) ENSMUSG00000032026	false
11937	TF-TG	ENSMUSG00000017950 (TF-TG) ENSMUSG00000026072	false
7841	TF-TG	ENSMUSG00000022479 (TF-TG) ENSMUSG00000032018	false
7839	TF-TG	ENSMUSG00000022479 (TF-TG) ENSMUSG00000032014	false
11933	TF-TG	ENSMUSG00000017950 (TF-TG) ENSMUSG00000025921	false
7837	TF-TG	ENSMUSG00000022479 (TF-TG) ENSMUSG00000031980	false
7836	TF-TG	ENSMUSG00000022479 (TF-TG) ENSMUSG00000031957	false
11931	TF-TG	ENSMUSG00000017950 (TF-TG) ENSMUSG00000025893	false
11930	TF-TG	ENSMUSG00000017950 (TF-TG) ENSMUSG00000025790	false
7834	TF-TG	ENSMUSG00000022479 (TF-TG) ENSMUSG00000031925	false
11929	TF-TG	ENSMUSG00000017950 (TF-TG) ENSMUSG00000025780	false
7833	TF-TG	ENSMUSG00000022479 (TF-TG) ENSMUSG00000031903	false
11928	TF-TG	ENSMUSG00000017950 (TF-TG) ENSMUSG00000025758	false
7829	TF-TG	ENSMUSG00000022479 (TF-TG) ENSMUSG00000031845	false
7827	TF-TG	ENSMUSG00000022479 (TF-TG) ENSMUSG00000031827	false
11920	TF-TG	ENSMUSG00000017950 (TF-TG) ENSMUSG00000025477	false
7823	TF-TG	ENSMUSG00000022479 (TF-TG) ENSMUSG00000031765	false
7821	TF-TG	ENSMUSG00000022479 (TF-TG) ENSMUSG00000031725	false
11915	TF-TG	ENSMUSG00000017950 (TF-TG) ENSMUSG00000025279	false
7818	TF-TG	ENSMUSG00000022479 (TF-TG) ENSMUSG00000031668	false
11912	TF-TG	ENSMUSG00000017950 (TF-TG) ENSMUSG00000025203	false
24197	TF-lincRNA	ENSMUSG00000003545 (TF-lincRNA) ENSMUSG00000085329	false
24196	TF-lincRNA	ENSMUSG00000003545 (TF-lincRNA) ENSMUSG00000104011	false
11907	TF-TG	ENSMUSG00000017950 (TF-TG) ENSMUSG00000025075	false
24194	TF-TG	ENSMUSG00000003545 (TF-TG) ENSMUSG00000079037	false
11906	TF-TG	ENSMUSG00000017950 (TF-TG) ENSMUSG00000025027	false
24193	TF-TG	ENSMUSG00000003545 (TF-TG) ENSMUSG00000072946	false
11905	TF-TG	ENSMUSG00000017950 (TF-TG) ENSMUSG00000025025	false
7809	TF-TG	ENSMUSG00000022479 (TF-TG) ENSMUSG00000031538	false
24192	TF-TG	ENSMUSG00000003545 (TF-TG) ENSMUSG00000070802	false
24191	TF-TG	ENSMUSG00000003545 (TF-TG) ENSMUSG00000070287	false
11903	TF-TG	ENSMUSG00000017950 (TF-TG) ENSMUSG00000024990	false
24190	TF-TG	ENSMUSG00000003545 (TF-TG) ENSMUSG00000069622	false
11902	TF-TG	ENSMUSG00000017950 (TF-TG) ENSMUSG00000024981	false
7806	TF-TG	ENSMUSG00000022479 (TF-TG) ENSMUSG00000031520	false
7805	TF-TG	ENSMUSG00000022479 (TF-TG) ENSMUSG00000031453	false
24188	TF-TG	ENSMUSG00000003545 (TF-TG) ENSMUSG00000066952	false
24187	TF-TG	ENSMUSG00000003545 (TF-TG) ENSMUSG00000064090	false
24186	TF-TG	ENSMUSG00000003545 (TF-TG) ENSMUSG00000063450	false
24185	TF-TG	ENSMUSG00000003545 (TF-TG) ENSMUSG00000063439	false
24184	TF-TG	ENSMUSG00000003545 (TF-TG) ENSMUSG00000061607	false
11896	TF-TG	ENSMUSG00000017950 (TF-TG) ENSMUSG00000024887	false
11895	TF-TG	ENSMUSG00000017950 (TF-TG) ENSMUSG00000024846	false
7798	TF-TG	ENSMUSG00000022479 (TF-TG) ENSMUSG00000031375	false
11893	TF-TG	ENSMUSG00000017950 (TF-TG) ENSMUSG00000024774	false
11892	TF-TG	ENSMUSG00000017950 (TF-TG) ENSMUSG00000024743	false
7796	TF-TG	ENSMUSG00000022479 (TF-TG) ENSMUSG00000031367	false
11889	TF-TG	ENSMUSG00000017950 (TF-TG) ENSMUSG00000024665	false
24174	TF-TG	ENSMUSG00000003545 (TF-TG) ENSMUSG00000053470	false
24173	TF-TG	ENSMUSG00000003545 (TF-TG) ENSMUSG00000053216	false
11884	TF-TG	ENSMUSG00000017950 (TF-TG) ENSMUSG00000024516	false
24167	TF-TG	ENSMUSG00000003545 (TF-TG) ENSMUSG00000049878	false
11878	TF-TG	ENSMUSG00000017950 (TF-TG) ENSMUSG00000024378	false
11877	TF-TG	ENSMUSG00000017950 (TF-TG) ENSMUSG00000024354	false
11876	TF-TG	ENSMUSG00000017950 (TF-TG) ENSMUSG00000024349	false
24163	TF-TG	ENSMUSG00000003545 (TF-TG) ENSMUSG00000047976	false
24162	TF-TG	ENSMUSG00000003545 (TF-TG) ENSMUSG00000047907	false
24161	TF-TG	ENSMUSG00000003545 (TF-TG) ENSMUSG00000047797	false
7777	TF-TG	ENSMUSG00000022479 (TF-TG) ENSMUSG00000030772	false
24160	TF-TG	ENSMUSG00000003545 (TF-TG) ENSMUSG00000046546	false
7776	TF-TG	ENSMUSG00000022479 (TF-TG) ENSMUSG00000030769	false
24159	TF-TG	ENSMUSG00000003545 (TF-TG) ENSMUSG00000046242	false
7775	TF-TG	ENSMUSG00000022479 (TF-TG) ENSMUSG00000030762	false
24158	TF-TG	ENSMUSG00000003545 (TF-TG) ENSMUSG00000046093	false
11870	TF-TG	ENSMUSG00000017950 (TF-TG) ENSMUSG00000024124	false
7773	TF-TG	ENSMUSG00000022479 (TF-TG) ENSMUSG00000030717	false
24156	TF-TG	ENSMUSG00000003545 (TF-TG) ENSMUSG00000045349	false
11867	TF-TG	ENSMUSG00000017950 (TF-TG) ENSMUSG00000024066	false
24153	TF-TG	ENSMUSG00000003545 (TF-TG) ENSMUSG00000044254	false
7769	TF-TG	ENSMUSG00000022479 (TF-TG) ENSMUSG00000030543	false
24152	TF-TG	ENSMUSG00000003545 (TF-TG) ENSMUSG00000043639	false
7768	TF-TG	ENSMUSG00000022479 (TF-TG) ENSMUSG00000030528	false
24151	TF-TG	ENSMUSG00000003545 (TF-TG) ENSMUSG00000043068	false
24150	TF-TG	ENSMUSG00000003545 (TF-TG) ENSMUSG00000043004	false
24148	TF-TG	ENSMUSG00000003545 (TF-TG) ENSMUSG00000042647	false
24146	TF-TG	ENSMUSG00000003545 (TF-TG) ENSMUSG00000041930	false
7761	TF-TG	ENSMUSG00000022479 (TF-TG) ENSMUSG00000030329	false
24144	TF-TG	ENSMUSG00000003545 (TF-TG) ENSMUSG00000040852	false
7760	TF-TG	ENSMUSG00000022479 (TF-TG) ENSMUSG00000030287	false
24143	TF-TG	ENSMUSG00000003545 (TF-TG) ENSMUSG00000040447	false
7759	TF-TG	ENSMUSG00000022479 (TF-TG) ENSMUSG00000030246	false
24142	TF-TG	ENSMUSG00000003545 (TF-TG) ENSMUSG00000040084	false
11854	TF-TG	ENSMUSG00000017950 (TF-TG) ENSMUSG00000023122	false
24141	TF-TG	ENSMUSG00000003545 (TF-TG) ENSMUSG00000039934	false
7756	TF-TG	ENSMUSG00000022479 (TF-TG) ENSMUSG00000030155	false
11850	TF-TG	ENSMUSG00000017950 (TF-TG) ENSMUSG00000023043	false
24137	TF-TG	ENSMUSG00000003545 (TF-TG) ENSMUSG00000039087	false
11849	TF-TG	ENSMUSG00000017950 (TF-TG) ENSMUSG00000023032	false
24136	TF-TG	ENSMUSG00000003545 (TF-TG) ENSMUSG00000039050	false
11848	TF-TG	ENSMUSG00000017950 (TF-TG) ENSMUSG00000022947	false
7752	TF-TG	ENSMUSG00000022479 (TF-TG) ENSMUSG00000030074	false
11847	TF-TG	ENSMUSG00000017950 (TF-TG) ENSMUSG00000022938	false
7751	TF-TG	ENSMUSG00000022479 (TF-TG) ENSMUSG00000030048	false
11846	TF-TG	ENSMUSG00000017950 (TF-TG) ENSMUSG00000022900	false
11845	TF-TG	ENSMUSG00000017950 (TF-TG) ENSMUSG00000022864	false
24131	TF-TG	ENSMUSG00000003545 (TF-TG) ENSMUSG00000038451	false
24130	TF-TG	ENSMUSG00000003545 (TF-TG) ENSMUSG00000038379	false
11842	TF-TG	ENSMUSG00000017950 (TF-TG) ENSMUSG00000022836	false
7743	TF-TG	ENSMUSG00000022479 (TF-TG) ENSMUSG00000029847	false
24126	TF-TG	ENSMUSG00000003545 (TF-TG) ENSMUSG00000037664	false
32316	TF-TG	ENSMUSG00000075304 (TF-TG) ENSMUSG00000062312	false
7740	TF-TG	ENSMUSG00000022479 (TF-TG) ENSMUSG00000029814	false
24123	TF-TG	ENSMUSG00000003545 (TF-TG) ENSMUSG00000037447	false
32313	TF-TG	ENSMUSG00000075304 (TF-TG) ENSMUSG00000056758	false
7737	TF-TG	ENSMUSG00000022479 (TF-TG) ENSMUSG00000029772	false
24120	TF-TG	ENSMUSG00000003545 (TF-TG) ENSMUSG00000036913	false
11832	TF-TG	ENSMUSG00000017950 (TF-TG) ENSMUSG00000022629	false
7736	TF-TG	ENSMUSG00000022479 (TF-TG) ENSMUSG00000029769	false
32311	TF-TG	ENSMUSG00000075304 (TF-TG) ENSMUSG00000056529	false
24119	TF-TG	ENSMUSG00000003545 (TF-TG) ENSMUSG00000035901	false
11831	TF-TG	ENSMUSG00000017950 (TF-TG) ENSMUSG00000022621	false
11829	TF-TG	ENSMUSG00000017950 (TF-TG) ENSMUSG00000022546	false
32308	TF-TG	ENSMUSG00000075304 (TF-TG) ENSMUSG00000053470	false
24116	TF-TG	ENSMUSG00000003545 (TF-TG) ENSMUSG00000035357	false
32307	TF-TG	ENSMUSG00000075304 (TF-TG) ENSMUSG00000053216	false
7731	TF-TG	ENSMUSG00000022479 (TF-TG) ENSMUSG00000029674	false
32306	TF-TG	ENSMUSG00000075304 (TF-TG) ENSMUSG00000052384	false
24114	TF-TG	ENSMUSG00000003545 (TF-TG) ENSMUSG00000035279	false
11825	TF-TG	ENSMUSG00000017950 (TF-TG) ENSMUSG00000022479	false
24112	TF-TG	ENSMUSG00000003545 (TF-TG) ENSMUSG00000034858	false
7727	TF-TG	ENSMUSG00000022479 (TF-TG) ENSMUSG00000029560	false
24110	TF-TG	ENSMUSG00000003545 (TF-TG) ENSMUSG00000034773	false
32301	TF-TG	ENSMUSG00000075304 (TF-TG) ENSMUSG00000050270	false
24109	TF-TG	ENSMUSG00000003545 (TF-TG) ENSMUSG00000034579	false
7725	TF-TG	ENSMUSG00000022479 (TF-TG) ENSMUSG00000029484	false
7724	TF-TG	ENSMUSG00000022479 (TF-TG) ENSMUSG00000029470	false
24107	TF-TG	ENSMUSG00000003545 (TF-TG) ENSMUSG00000034265	false
32298	TF-TG	ENSMUSG00000075304 (TF-TG) ENSMUSG00000048279	false
11818	TF-TG	ENSMUSG00000017950 (TF-TG) ENSMUSG00000022364	false
7721	TF-TG	ENSMUSG00000022479 (TF-TG) ENSMUSG00000029413	false
32295	TF-TG	ENSMUSG00000075304 (TF-TG) ENSMUSG00000047501	false
24103	TF-TG	ENSMUSG00000003545 (TF-TG) ENSMUSG00000033287	false
11815	TF-TG	ENSMUSG00000017950 (TF-TG) ENSMUSG00000022253	false
11814	TF-TG	ENSMUSG00000017950 (TF-TG) ENSMUSG00000022235	false
7718	TF-TG	ENSMUSG00000022479 (TF-TG) ENSMUSG00000029370	false
32293	TF-TG	ENSMUSG00000075304 (TF-TG) ENSMUSG00000043391	false
24101	TF-TG	ENSMUSG00000003545 (TF-TG) ENSMUSG00000032849	false
32292	TF-TG	ENSMUSG00000075304 (TF-TG) ENSMUSG00000041930	false
7716	TF-TG	ENSMUSG00000022479 (TF-TG) ENSMUSG00000029343	false
24099	TF-TG	ENSMUSG00000003545 (TF-TG) ENSMUSG00000032294	false
11811	TF-TG	ENSMUSG00000017950 (TF-TG) ENSMUSG00000022217	false
32290	TF-TG	ENSMUSG00000075304 (TF-TG) ENSMUSG00000040852	false
24098	TF-TG	ENSMUSG00000003545 (TF-TG) ENSMUSG00000031845	false
32289	TF-TG	ENSMUSG00000075304 (TF-TG) ENSMUSG00000040280	false
24097	TF-TG	ENSMUSG00000003545 (TF-TG) ENSMUSG00000031791	false
11809	TF-TG	ENSMUSG00000017950 (TF-TG) ENSMUSG00000022180	false
7713	TF-TG	ENSMUSG00000022479 (TF-TG) ENSMUSG00000029330	false
32287	TF-TG	ENSMUSG00000075304 (TF-TG) ENSMUSG00000039911	false
11807	TF-TG	ENSMUSG00000017950 (TF-TG) ENSMUSG00000022148	false
32286	TF-TG	ENSMUSG00000075304 (TF-TG) ENSMUSG00000037820	false
11806	TF-TG	ENSMUSG00000017950 (TF-TG) ENSMUSG00000022136	false
11805	TF-TG	ENSMUSG00000017950 (TF-TG) ENSMUSG00000022094	false
32284	TF-TG	ENSMUSG00000075304 (TF-TG) ENSMUSG00000036123	false
24091	TF-TG	ENSMUSG00000003545 (TF-TG) ENSMUSG00000030074	false
24090	TF-TG	ENSMUSG00000003545 (TF-TG) ENSMUSG00000029484	false
11802	TF-TG	ENSMUSG00000017950 (TF-TG) ENSMUSG00000021986	false
7706	TF-TG	ENSMUSG00000022479 (TF-TG) ENSMUSG00000029177	false
24089	TF-TG	ENSMUSG00000003545 (TF-TG) ENSMUSG00000029330	false
11801	TF-TG	ENSMUSG00000017950 (TF-TG) ENSMUSG00000021957	false
7705	TF-TG	ENSMUSG00000022479 (TF-TG) ENSMUSG00000029173	false
32280	TF-TG	ENSMUSG00000075304 (TF-TG) ENSMUSG00000032245	false
24088	TF-TG	ENSMUSG00000003545 (TF-TG) ENSMUSG00000029161	false
11800	TF-TG	ENSMUSG00000017950 (TF-TG) ENSMUSG00000021947	false
32279	TF-TG	ENSMUSG00000075304 (TF-TG) ENSMUSG00000032014	false
11798	TF-TG	ENSMUSG00000017950 (TF-TG) ENSMUSG00000021876	false
32277	TF-TG	ENSMUSG00000075304 (TF-TG) ENSMUSG00000030246	false
11797	TF-TG	ENSMUSG00000017950 (TF-TG) ENSMUSG00000021838	false
24084	TF-TG	ENSMUSG00000003545 (TF-TG) ENSMUSG00000028341	false
32275	TF-TG	ENSMUSG00000075304 (TF-TG) ENSMUSG00000029413	false
24083	TF-TG	ENSMUSG00000003545 (TF-TG) ENSMUSG00000028186	false
32274	TF-TG	ENSMUSG00000075304 (TF-TG) ENSMUSG00000028649	false
11794	TF-TG	ENSMUSG00000017950 (TF-TG) ENSMUSG00000021684	false
24081	TF-TG	ENSMUSG00000003545 (TF-TG) ENSMUSG00000027544	false
24080	TF-TG	ENSMUSG00000003545 (TF-TG) ENSMUSG00000027534	false
24079	TF-TG	ENSMUSG00000003545 (TF-TG) ENSMUSG00000027333	false
32270	TF-TG	ENSMUSG00000075304 (TF-TG) ENSMUSG00000025608	false
24078	TF-TG	ENSMUSG00000003545 (TF-TG) ENSMUSG00000027313	false
32269	TF-TG	ENSMUSG00000075304 (TF-TG) ENSMUSG00000024665	false
11789	TF-TG	ENSMUSG00000017950 (TF-TG) ENSMUSG00000021559	false
11788	TF-TG	ENSMUSG00000017950 (TF-TG) ENSMUSG00000021539	false
24074	TF-TG	ENSMUSG00000003545 (TF-TG) ENSMUSG00000026764	false
7690	TF-TG	ENSMUSG00000022479 (TF-TG) ENSMUSG00000028943	false
7689	TF-TG	ENSMUSG00000022479 (TF-TG) ENSMUSG00000028874	false
32264	TF-TG	ENSMUSG00000075304 (TF-TG) ENSMUSG00000021453	false
32263	TF-TG	ENSMUSG00000075304 (TF-TG) ENSMUSG00000020875	false
32262	TF-TG	ENSMUSG00000075304 (TF-TG) ENSMUSG00000020715	false
11782	TF-TG	ENSMUSG00000017950 (TF-TG) ENSMUSG00000021221	false
24068	TF-TG	ENSMUSG00000003545 (TF-TG) ENSMUSG00000025959	false
11779	TF-TG	ENSMUSG00000017950 (TF-TG) ENSMUSG00000021185	false
11778	TF-TG	ENSMUSG00000017950 (TF-TG) ENSMUSG00000021094	false
32257	TF-TG	ENSMUSG00000075304 (TF-TG) ENSMUSG00000019564	false
24065	TF-TG	ENSMUSG00000003545 (TF-TG) ENSMUSG00000025027	false
11777	TF-TG	ENSMUSG00000017950 (TF-TG) ENSMUSG00000020900	false
24064	TF-TG	ENSMUSG00000003545 (TF-TG) ENSMUSG00000024887	false
11775	TF-TG	ENSMUSG00000017950 (TF-TG) ENSMUSG00000020894	false
7679	TF-TG	ENSMUSG00000022479 (TF-TG) ENSMUSG00000028649	false
11774	TF-TG	ENSMUSG00000017950 (TF-TG) ENSMUSG00000020892	false
32253	TF-TG	ENSMUSG00000075304 (TF-TG) ENSMUSG00000015647	false
24061	TF-TG	ENSMUSG00000003545 (TF-TG) ENSMUSG00000024552	false
24060	TF-TG	ENSMUSG00000003545 (TF-TG) ENSMUSG00000024516	false
11772	TF-TG	ENSMUSG00000017950 (TF-TG) ENSMUSG00000020872	false
7676	TF-TG	ENSMUSG00000022479 (TF-TG) ENSMUSG00000028634	false
7675	TF-TG	ENSMUSG00000022479 (TF-TG) ENSMUSG00000028614	false
24058	TF-TG	ENSMUSG00000003545 (TF-TG) ENSMUSG00000024033	false
11770	TF-TG	ENSMUSG00000017950 (TF-TG) ENSMUSG00000020838	false
7674	TF-TG	ENSMUSG00000022479 (TF-TG) ENSMUSG00000028602	false
32249	TF-TG	ENSMUSG00000075304 (TF-TG) ENSMUSG00000014303	false
24057	TF-TG	ENSMUSG00000003545 (TF-TG) ENSMUSG00000023224	false
24056	TF-TG	ENSMUSG00000003545 (TF-TG) ENSMUSG00000022995	false
7672	TF-TG	ENSMUSG00000022479 (TF-TG) ENSMUSG00000028576	false
32247	TF-TG	ENSMUSG00000075304 (TF-TG) ENSMUSG00000004113	false
24055	TF-TG	ENSMUSG00000003545 (TF-TG) ENSMUSG00000022769	false
11767	TF-TG	ENSMUSG00000017950 (TF-TG) ENSMUSG00000020741	false
7671	TF-TG	ENSMUSG00000022479 (TF-TG) ENSMUSG00000028555	false
11766	TF-TG	ENSMUSG00000017950 (TF-TG) ENSMUSG00000020715	false
7670	TF-TG	ENSMUSG00000022479 (TF-TG) ENSMUSG00000028542	false
32244	TF-TG	ENSMUSG00000075304 (TF-TG) ENSMUSG00000000056	false
24052	TF-TG	ENSMUSG00000003545 (TF-TG) ENSMUSG00000022629	false
32243	TF-lincRNA	ENSMUSG00000068154 (TF-lincRNA) ENSMUSG00000044522	false
24051	TF-TG	ENSMUSG00000003545 (TF-TG) ENSMUSG00000022555	false
11763	TF-TG	ENSMUSG00000017950 (TF-TG) ENSMUSG00000020641	false
32242	TF-lincRNA	ENSMUSG00000068154 (TF-lincRNA) ENSMUSG00000085329	false
24050	TF-TG	ENSMUSG00000003545 (TF-TG) ENSMUSG00000022364	false
7666	TF-TG	ENSMUSG00000022479 (TF-TG) ENSMUSG00000028517	false
32240	TF-lincRNA	ENSMUSG00000068154 (TF-lincRNA) ENSMUSG00000102106	false
24047	TF-TG	ENSMUSG00000003545 (TF-TG) ENSMUSG00000021831	false
11758	TF-TG	ENSMUSG00000017950 (TF-TG) ENSMUSG00000020407	false
7662	TF-TG	ENSMUSG00000022479 (TF-TG) ENSMUSG00000028415	false
32237	TF-lincRNA	ENSMUSG00000068154 (TF-lincRNA) ENSMUSG00000109084	false
11757	TF-TG	ENSMUSG00000017950 (TF-TG) ENSMUSG00000020402	false
24044	TF-TG	ENSMUSG00000003545 (TF-TG) ENSMUSG00000020892	false
7660	TF-TG	ENSMUSG00000022479 (TF-TG) ENSMUSG00000028341	false
32235	TF-lincRNA	ENSMUSG00000068154 (TF-lincRNA) ENSMUSG00000097277	false
11755	TF-TG	ENSMUSG00000017950 (TF-TG) ENSMUSG00000020376	false
7659	TF-TG	ENSMUSG00000022479 (TF-TG) ENSMUSG00000028327	false
32234	TF-lincRNA	ENSMUSG00000068154 (TF-lincRNA) ENSMUSG00000097287	false
11753	TF-TG	ENSMUSG00000017950 (TF-TG) ENSMUSG00000020277	false
32232	TF-lincRNA	ENSMUSG00000068154 (TF-lincRNA) ENSMUSG00000104011	false
32231	TF-TG	ENSMUSG00000068154 (TF-TG) ENSMUSG00000110266	false
11751	TF-TG	ENSMUSG00000017950 (TF-TG) ENSMUSG00000020230	false
32230	TF-TG	ENSMUSG00000068154 (TF-TG) ENSMUSG00000109946	false
24038	TF-TG	ENSMUSG00000003545 (TF-TG) ENSMUSG00000020015	false
11749	TF-TG	ENSMUSG00000017950 (TF-TG) ENSMUSG00000020226	false
32227	TF-TG	ENSMUSG00000068154 (TF-TG) ENSMUSG00000096472	false
24035	TF-TG	ENSMUSG00000003545 (TF-TG) ENSMUSG00000019796	false
7651	TF-TG	ENSMUSG00000022479 (TF-TG) ENSMUSG00000028211	false
32226	TF-TG	ENSMUSG00000068154 (TF-TG) ENSMUSG00000094928	false
7650	TF-TG	ENSMUSG00000022479 (TF-TG) ENSMUSG00000028186	false
24033	TF-TG	ENSMUSG00000003545 (TF-TG) ENSMUSG00000019194	false
32224	TF-TG	ENSMUSG00000068154 (TF-TG) ENSMUSG00000094091	false
24032	TF-TG	ENSMUSG00000003545 (TF-TG) ENSMUSG00000017652	false
11744	TF-TG	ENSMUSG00000017950 (TF-TG) ENSMUSG00000020092	false
24031	TF-TG	ENSMUSG00000003545 (TF-TG) ENSMUSG00000015850	false
24030	TF-TG	ENSMUSG00000003545 (TF-TG) ENSMUSG00000014351	false
11742	TF-TG	ENSMUSG00000017950 (TF-TG) ENSMUSG00000020015	false
32221	TF-TG	ENSMUSG00000068154 (TF-TG) ENSMUSG00000090891	false
24029	TF-TG	ENSMUSG00000003545 (TF-TG) ENSMUSG00000014164	false
24028	TF-TG	ENSMUSG00000003545 (TF-TG) ENSMUSG00000013089	false
11740	TF-TG	ENSMUSG00000017950 (TF-TG) ENSMUSG00000020009	false
11739	TF-TG	ENSMUSG00000017950 (TF-TG) ENSMUSG00000019942	false
24026	TF-TG	ENSMUSG00000003545 (TF-TG) ENSMUSG00000011148	false
7642	TF-TG	ENSMUSG00000022479 (TF-TG) ENSMUSG00000028076	false
11737	TF-TG	ENSMUSG00000017950 (TF-TG) ENSMUSG00000019838	false
32216	TF-TG	ENSMUSG00000068154 (TF-TG) ENSMUSG00000078954	false
11736	TF-TG	ENSMUSG00000017950 (TF-TG) ENSMUSG00000019796	false
32215	TF-TG	ENSMUSG00000068154 (TF-TG) ENSMUSG00000078650	false
24023	TF-TG	ENSMUSG00000003545 (TF-TG) ENSMUSG00000009739	false
32214	TF-TG	ENSMUSG00000068154 (TF-TG) ENSMUSG00000078515	false
24022	TF-TG	ENSMUSG00000003545 (TF-TG) ENSMUSG00000006731	false
24021	TF-TG	ENSMUSG00000003545 (TF-TG) ENSMUSG00000006494	false
11732	TF-TG	ENSMUSG00000017950 (TF-TG) ENSMUSG00000019232	false
7636	TF-TG	ENSMUSG00000022479 (TF-TG) ENSMUSG00000027995	false
32211	TF-TG	ENSMUSG00000068154 (TF-TG) ENSMUSG00000074715	false
11730	TF-TG	ENSMUSG00000017950 (TF-TG) ENSMUSG00000018909	false
7634	TF-TG	ENSMUSG00000022479 (TF-TG) ENSMUSG00000027954	false
32209	TF-TG	ENSMUSG00000068154 (TF-TG) ENSMUSG00000074282	false
24016	TF-TG	ENSMUSG00000003545 (TF-TG) ENSMUSG00000005611	false
7631	TF-TG	ENSMUSG00000022479 (TF-TG) ENSMUSG00000027931	false
32206	TF-TG	ENSMUSG00000068154 (TF-TG) ENSMUSG00000072946	false
11726	TF-TG	ENSMUSG00000017950 (TF-TG) ENSMUSG00000018752	false
7630	TF-TG	ENSMUSG00000022479 (TF-TG) ENSMUSG00000027907	false
7629	TF-TG	ENSMUSG00000022479 (TF-TG) ENSMUSG00000027890	false
7628	TF-TG	ENSMUSG00000022479 (TF-TG) ENSMUSG00000027883	false
24011	TF-TG	ENSMUSG00000003545 (TF-TG) ENSMUSG00000004113	false
32202	TF-TG	ENSMUSG00000068154 (TF-TG) ENSMUSG00000072115	false
24009	TF-TG	ENSMUSG00000003545 (TF-TG) ENSMUSG00000000126	false
11720	TF-TG	ENSMUSG00000017950 (TF-TG) ENSMUSG00000018334	false
11719	TF-TG	ENSMUSG00000017950 (TF-TG) ENSMUSG00000018042	false
32197	TF-TG	ENSMUSG00000068154 (TF-TG) ENSMUSG00000070777	false
11717	TF-TG	ENSMUSG00000017950 (TF-TG) ENSMUSG00000017716	false
7621	TF-TG	ENSMUSG00000022479 (TF-TG) ENSMUSG00000027799	false
32196	TF-TG	ENSMUSG00000068154 (TF-TG) ENSMUSG00000070407	false
11715	TF-TG	ENSMUSG00000017950 (TF-TG) ENSMUSG00000017453	false
32194	TF-TG	ENSMUSG00000068154 (TF-TG) ENSMUSG00000070332	false
7618	TF-TG	ENSMUSG00000022479 (TF-TG) ENSMUSG00000027750	false
11713	TF-TG	ENSMUSG00000017950 (TF-TG) ENSMUSG00000017165	false
7617	TF-TG	ENSMUSG00000022479 (TF-TG) ENSMUSG00000027746	false
32192	TF-TG	ENSMUSG00000068154 (TF-TG) ENSMUSG00000069170	false
11712	TF-TG	ENSMUSG00000017950 (TF-TG) ENSMUSG00000016758	false
7616	TF-TG	ENSMUSG00000022479 (TF-TG) ENSMUSG00000027737	false
32190	TF-TG	ENSMUSG00000068154 (TF-TG) ENSMUSG00000068742	false
11710	TF-TG	ENSMUSG00000017950 (TF-TG) ENSMUSG00000016541	false
7613	TF-TG	ENSMUSG00000022479 (TF-TG) ENSMUSG00000027692	false
11707	TF-TG	ENSMUSG00000017950 (TF-TG) ENSMUSG00000015850	false
11704	TF-TG	ENSMUSG00000017950 (TF-TG) ENSMUSG00000015745	false
32183	TF-TG	ENSMUSG00000068154 (TF-TG) ENSMUSG00000064215	false
11703	TF-TG	ENSMUSG00000017950 (TF-TG) ENSMUSG00000015647	false
32182	TF-TG	ENSMUSG00000068154 (TF-TG) ENSMUSG00000064202	false
11702	TF-TG	ENSMUSG00000017950 (TF-TG) ENSMUSG00000015396	false
7605	TF-TG	ENSMUSG00000022479 (TF-TG) ENSMUSG00000027544	false
32180	TF-TG	ENSMUSG00000068154 (TF-TG) ENSMUSG00000063568	false
7604	TF-TG	ENSMUSG00000022479 (TF-TG) ENSMUSG00000027534	false
11699	TF-TG	ENSMUSG00000017950 (TF-TG) ENSMUSG00000015112	false
7603	TF-TG	ENSMUSG00000022479 (TF-TG) ENSMUSG00000027514	false
32178	TF-TG	ENSMUSG00000068154 (TF-TG) ENSMUSG00000063439	false
11698	TF-TG	ENSMUSG00000017950 (TF-TG) ENSMUSG00000014599	false
32177	TF-TG	ENSMUSG00000068154 (TF-TG) ENSMUSG00000063229	false
32176	TF-TG	ENSMUSG00000068154 (TF-TG) ENSMUSG00000062753	false
11696	TF-TG	ENSMUSG00000017950 (TF-TG) ENSMUSG00000014351	false
11695	TF-TG	ENSMUSG00000017950 (TF-TG) ENSMUSG00000014303	false
32174	TF-TG	ENSMUSG00000068154 (TF-TG) ENSMUSG00000062078	false
11694	TF-TG	ENSMUSG00000017950 (TF-TG) ENSMUSG00000013846	false
32173	TF-TG	ENSMUSG00000068154 (TF-TG) ENSMUSG00000062070	false
7597	TF-TG	ENSMUSG00000022479 (TF-TG) ENSMUSG00000027435	false
32171	TF-TG	ENSMUSG00000068154 (TF-TG) ENSMUSG00000061607	false
32170	TF-TG	ENSMUSG00000068154 (TF-TG) ENSMUSG00000061578	false
11690	TF-TG	ENSMUSG00000017950 (TF-TG) ENSMUSG00000011148	false
32169	TF-TG	ENSMUSG00000068154 (TF-TG) ENSMUSG00000061531	false
11689	TF-TG	ENSMUSG00000017950 (TF-TG) ENSMUSG00000011008	false
32168	TF-TG	ENSMUSG00000068154 (TF-TG) ENSMUSG00000060962	false
7591	TF-TG	ENSMUSG00000022479 (TF-TG) ENSMUSG00000027358	false
11684	TF-TG	ENSMUSG00000017950 (TF-TG) ENSMUSG00000010362	false
7588	TF-TG	ENSMUSG00000022479 (TF-TG) ENSMUSG00000027333	false
32163	TF-TG	ENSMUSG00000068154 (TF-TG) ENSMUSG00000059713	false
11683	TF-TG	ENSMUSG00000017950 (TF-TG) ENSMUSG00000010122	false
32162	TF-TG	ENSMUSG00000068154 (TF-TG) ENSMUSG00000059540	false
11682	TF-TG	ENSMUSG00000017950 (TF-TG) ENSMUSG00000009739	false
11681	TF-TG	ENSMUSG00000017950 (TF-TG) ENSMUSG00000009646	false
7585	TF-TG	ENSMUSG00000022479 (TF-TG) ENSMUSG00000027316	false
7584	TF-TG	ENSMUSG00000022479 (TF-TG) ENSMUSG00000027313	false
32156	TF-TG	ENSMUSG00000068154 (TF-TG) ENSMUSG00000058145	false
11674	TF-TG	ENSMUSG00000017950 (TF-TG) ENSMUSG00000007207	false
7578	TF-TG	ENSMUSG00000022479 (TF-TG) ENSMUSG00000027173	false
11673	TF-TG	ENSMUSG00000017950 (TF-TG) ENSMUSG00000006800	false
11671	TF-TG	ENSMUSG00000017950 (TF-TG) ENSMUSG00000006731	false
7574	TF-TG	ENSMUSG00000022479 (TF-TG) ENSMUSG00000027068	false
32149	TF-TG	ENSMUSG00000068154 (TF-TG) ENSMUSG00000056069	false
7573	TF-TG	ENSMUSG00000022479 (TF-TG) ENSMUSG00000027006	false
11668	TF-TG	ENSMUSG00000017950 (TF-TG) ENSMUSG00000006642	false
32147	TF-TG	ENSMUSG00000068154 (TF-TG) ENSMUSG00000055675	false
7571	TF-TG	ENSMUSG00000022479 (TF-TG) ENSMUSG00000026980	false
11666	TF-TG	ENSMUSG00000017950 (TF-TG) ENSMUSG00000006494	false
32142	TF-TG	ENSMUSG00000068154 (TF-TG) ENSMUSG00000055114	false
11662	TF-TG	ENSMUSG00000017950 (TF-TG) ENSMUSG00000005873	false
7566	TF-TG	ENSMUSG00000022479 (TF-TG) ENSMUSG00000026921	false
32141	TF-TG	ENSMUSG00000068154 (TF-TG) ENSMUSG00000054967	false
11661	TF-TG	ENSMUSG00000017950 (TF-TG) ENSMUSG00000005677	false
32140	TF-TG	ENSMUSG00000068154 (TF-TG) ENSMUSG00000054920	false
7564	TF-TG	ENSMUSG00000022479 (TF-TG) ENSMUSG00000026880	false
11659	TF-TG	ENSMUSG00000017950 (TF-TG) ENSMUSG00000005611	false
7563	TF-TG	ENSMUSG00000022479 (TF-TG) ENSMUSG00000026879	false
11658	TF-TG	ENSMUSG00000017950 (TF-TG) ENSMUSG00000005413	false
11657	TF-TG	ENSMUSG00000017950 (TF-TG) ENSMUSG00000005373	false
11655	TF-TG	ENSMUSG00000017950 (TF-TG) ENSMUSG00000005320	false
7559	TF-TG	ENSMUSG00000022479 (TF-TG) ENSMUSG00000026820	false
32134	TF-TG	ENSMUSG00000068154 (TF-TG) ENSMUSG00000054474	false
11654	TF-TG	ENSMUSG00000017950 (TF-TG) ENSMUSG00000004864	false
32132	TF-TG	ENSMUSG00000068154 (TF-TG) ENSMUSG00000054200	false
7556	TF-TG	ENSMUSG00000022479 (TF-TG) ENSMUSG00000026782	false
11651	TF-TG	ENSMUSG00000017950 (TF-TG) ENSMUSG00000004328	false
7555	TF-TG	ENSMUSG00000022479 (TF-TG) ENSMUSG00000026773	false
32130	TF-TG	ENSMUSG00000068154 (TF-TG) ENSMUSG00000053765	false
32129	TF-TG	ENSMUSG00000068154 (TF-TG) ENSMUSG00000053617	false
11649	TF-TG	ENSMUSG00000017950 (TF-TG) ENSMUSG00000004044	false
7553	TF-TG	ENSMUSG00000022479 (TF-TG) ENSMUSG00000026764	false
32128	TF-TG	ENSMUSG00000068154 (TF-TG) ENSMUSG00000053470	false
7552	TF-TG	ENSMUSG00000022479 (TF-TG) ENSMUSG00000026730	false
32127	TF-TG	ENSMUSG00000068154 (TF-TG) ENSMUSG00000053460	false
11647	TF-TG	ENSMUSG00000017950 (TF-TG) ENSMUSG00000003545	false
11646	TF-TG	ENSMUSG00000017950 (TF-TG) ENSMUSG00000003541	false
32124	TF-TG	ENSMUSG00000068154 (TF-TG) ENSMUSG00000052584	false
11644	TF-TG	ENSMUSG00000017950 (TF-TG) ENSMUSG00000003420	false
32122	TF-TG	ENSMUSG00000068154 (TF-TG) ENSMUSG00000052353	false
11642	TF-TG	ENSMUSG00000017950 (TF-TG) ENSMUSG00000002885	false
7546	TF-TG	ENSMUSG00000022479 (TF-TG) ENSMUSG00000026649	false
7545	TF-TG	ENSMUSG00000022479 (TF-TG) ENSMUSG00000026605	false
7544	TF-TG	ENSMUSG00000022479 (TF-TG) ENSMUSG00000026604	false
32118	TF-TG	ENSMUSG00000068154 (TF-TG) ENSMUSG00000051314	false
7542	TF-TG	ENSMUSG00000022479 (TF-TG) ENSMUSG00000026546	false
32116	TF-TG	ENSMUSG00000068154 (TF-TG) ENSMUSG00000051185	false
7540	TF-TG	ENSMUSG00000022479 (TF-TG) ENSMUSG00000026520	false
11635	TF-TG	ENSMUSG00000017950 (TF-TG) ENSMUSG00000001467	false
7539	TF-TG	ENSMUSG00000022479 (TF-TG) ENSMUSG00000026509	false
32111	TF-TG	ENSMUSG00000068154 (TF-TG) ENSMUSG00000050737	false
32110	TF-TG	ENSMUSG00000068154 (TF-TG) ENSMUSG00000050721	false
32109	TF-TG	ENSMUSG00000068154 (TF-TG) ENSMUSG00000050270	false
11629	TF-TG	ENSMUSG00000017950 (TF-TG) ENSMUSG00000000732	false
32108	TF-TG	ENSMUSG00000068154 (TF-TG) ENSMUSG00000050064	false
11628	TF-TG	ENSMUSG00000017950 (TF-TG) ENSMUSG00000000673	false
7532	TF-TG	ENSMUSG00000022479 (TF-TG) ENSMUSG00000026447	false
32107	TF-TG	ENSMUSG00000068154 (TF-TG) ENSMUSG00000049878	false
32105	TF-TG	ENSMUSG00000068154 (TF-TG) ENSMUSG00000049588	false
11625	TF-TG	ENSMUSG00000017950 (TF-TG) ENSMUSG00000000056	false
32104	TF-TG	ENSMUSG00000068154 (TF-TG) ENSMUSG00000049580	false
11624	TF-TG	ENSMUSG00000017950 (TF-TG) ENSMUSG00000037583	false
32103	TF-TG	ENSMUSG00000068154 (TF-TG) ENSMUSG00000049154	false
7527	TF-TG	ENSMUSG00000022479 (TF-TG) ENSMUSG00000026415	false
7526	TF-TG	ENSMUSG00000022479 (TF-TG) ENSMUSG00000026405	false
7525	TF-TG	ENSMUSG00000022479 (TF-TG) ENSMUSG00000026398	false
32100	TF-TG	ENSMUSG00000068154 (TF-TG) ENSMUSG00000048458	false
32099	TF-TG	ENSMUSG00000068154 (TF-TG) ENSMUSG00000048217	false
32098	TF-TG	ENSMUSG00000068154 (TF-TG) ENSMUSG00000047963	false
32097	TF-TG	ENSMUSG00000068154 (TF-TG) ENSMUSG00000047907	false
32096	TF-TG	ENSMUSG00000068154 (TF-TG) ENSMUSG00000047797	false
32092	TF-TG	ENSMUSG00000068154 (TF-TG) ENSMUSG00000047501	false
27995	TF-TG	ENSMUSG00000005677 (TF-TG) ENSMUSG00000052131	false
7514	TF-TG	ENSMUSG00000022479 (TF-TG) ENSMUSG00000026227	false
32089	TF-TG	ENSMUSG00000068154 (TF-TG) ENSMUSG00000047139	false
27993	TF-TG	ENSMUSG00000005677 (TF-TG) ENSMUSG00000017950	false
7513	TF-TG	ENSMUSG00000022479 (TF-TG) ENSMUSG00000026223	false
32085	TF-TG	ENSMUSG00000068154 (TF-TG) ENSMUSG00000046546	false
7509	TF-TG	ENSMUSG00000022479 (TF-TG) ENSMUSG00000026170	false
32084	TF-TG	ENSMUSG00000068154 (TF-TG) ENSMUSG00000046447	false
7506	TF-TG	ENSMUSG00000022479 (TF-TG) ENSMUSG00000026107	false
32081	TF-TG	ENSMUSG00000068154 (TF-TG) ENSMUSG00000046070	false
7505	TF-TG	ENSMUSG00000022479 (TF-TG) ENSMUSG00000026103	false
7504	TF-TG	ENSMUSG00000022479 (TF-TG) ENSMUSG00000026077	false
7503	TF-TG	ENSMUSG00000022479 (TF-TG) ENSMUSG00000026072	false
32078	TF-TG	ENSMUSG00000068154 (TF-TG) ENSMUSG00000045349	false
32075	TF-TG	ENSMUSG00000068154 (TF-TG) ENSMUSG00000045007	false
7498	TF-TG	ENSMUSG00000022479 (TF-TG) ENSMUSG00000025959	false
32073	TF-TG	ENSMUSG00000068154 (TF-TG) ENSMUSG00000044674	false
7496	TF-TG	ENSMUSG00000022479 (TF-TG) ENSMUSG00000025921	false
32071	TF-TG	ENSMUSG00000068154 (TF-TG) ENSMUSG00000044254	false
7494	TF-TG	ENSMUSG00000022479 (TF-TG) ENSMUSG00000025893	false
7491	TF-TG	ENSMUSG00000022479 (TF-TG) ENSMUSG00000025790	false
32066	TF-TG	ENSMUSG00000068154 (TF-TG) ENSMUSG00000043391	false
7490	TF-TG	ENSMUSG00000022479 (TF-TG) ENSMUSG00000025780	false
32065	TF-TG	ENSMUSG00000068154 (TF-TG) ENSMUSG00000043068	false
32064	TF-TG	ENSMUSG00000068154 (TF-TG) ENSMUSG00000042797	false
7488	TF-TG	ENSMUSG00000022479 (TF-TG) ENSMUSG00000025758	false
32061	TF-TG	ENSMUSG00000068154 (TF-TG) ENSMUSG00000042647	false
7483	TF-TG	ENSMUSG00000022479 (TF-TG) ENSMUSG00000025608	false
32057	TF-TG	ENSMUSG00000068154 (TF-TG) ENSMUSG00000042115	false
32056	TF-TG	ENSMUSG00000068154 (TF-TG) ENSMUSG00000041930	false
32051	TF-TG	ENSMUSG00000068154 (TF-TG) ENSMUSG00000041431	false
32050	TF-TG	ENSMUSG00000068154 (TF-TG) ENSMUSG00000041237	false
32049	TF-TG	ENSMUSG00000068154 (TF-TG) ENSMUSG00000041219	false
7471	TF-TG	ENSMUSG00000022479 (TF-TG) ENSMUSG00000025477	false
32045	TF-TG	ENSMUSG00000068154 (TF-TG) ENSMUSG00000041064	false
32044	TF-TG	ENSMUSG00000068154 (TF-TG) ENSMUSG00000041058	false
32042	TF-TG	ENSMUSG00000068154 (TF-TG) ENSMUSG00000040918	false
32041	TF-TG	ENSMUSG00000068154 (TF-TG) ENSMUSG00000040852	false
7463	TF-TG	ENSMUSG00000022479 (TF-TG) ENSMUSG00000025348	false
32038	TF-TG	ENSMUSG00000068154 (TF-TG) ENSMUSG00000040640	false
32036	TF-TG	ENSMUSG00000068154 (TF-TG) ENSMUSG00000040447	false
32035	TF-TG	ENSMUSG00000068154 (TF-TG) ENSMUSG00000040280	false
7458	TF-TG	ENSMUSG00000022479 (TF-TG) ENSMUSG00000025203	false
32030	TF-TG	ENSMUSG00000068154 (TF-TG) ENSMUSG00000040127	false
7453	TF-TG	ENSMUSG00000022479 (TF-TG) ENSMUSG00000025176	false
32028	TF-TG	ENSMUSG00000068154 (TF-TG) ENSMUSG00000039934	false
7452	TF-TG	ENSMUSG00000022479 (TF-TG) ENSMUSG00000025161	false
7451	TF-TG	ENSMUSG00000022479 (TF-TG) ENSMUSG00000025154	false
32023	TF-TG	ENSMUSG00000068154 (TF-TG) ENSMUSG00000039470	false
7445	TF-TG	ENSMUSG00000022479 (TF-TG) ENSMUSG00000025075	false
32020	TF-TG	ENSMUSG00000068154 (TF-TG) ENSMUSG00000039232	false
7444	TF-TG	ENSMUSG00000022479 (TF-TG) ENSMUSG00000025037	false
7443	TF-TG	ENSMUSG00000022479 (TF-TG) ENSMUSG00000025027	false
32017	TF-TG	ENSMUSG00000068154 (TF-TG) ENSMUSG00000039126	false
7441	TF-TG	ENSMUSG00000022479 (TF-TG) ENSMUSG00000025025	false
32015	TF-TG	ENSMUSG00000068154 (TF-TG) ENSMUSG00000039087	false
32014	TF-TG	ENSMUSG00000068154 (TF-TG) ENSMUSG00000038903	false
7438	TF-TG	ENSMUSG00000022479 (TF-TG) ENSMUSG00000024990	false
32013	TF-TG	ENSMUSG00000068154 (TF-TG) ENSMUSG00000038884	false
7437	TF-TG	ENSMUSG00000022479 (TF-TG) ENSMUSG00000024981	false
32012	TF-TG	ENSMUSG00000068154 (TF-TG) ENSMUSG00000038843	false
32011	TF-TG	ENSMUSG00000068154 (TF-TG) ENSMUSG00000038836	false
32008	TF-TG	ENSMUSG00000068154 (TF-TG) ENSMUSG00000038599	false
32005	TF-TG	ENSMUSG00000068154 (TF-TG) ENSMUSG00000038463	false
32003	TF-TG	ENSMUSG00000068154 (TF-TG) ENSMUSG00000038451	false
7427	TF-TG	ENSMUSG00000022479 (TF-TG) ENSMUSG00000024887	false
32002	TF-TG	ENSMUSG00000068154 (TF-TG) ENSMUSG00000038349	false
7425	TF-TG	ENSMUSG00000022479 (TF-TG) ENSMUSG00000024846	false
31999	TF-TG	ENSMUSG00000068154 (TF-TG) ENSMUSG00000038042	false
31997	TF-TG	ENSMUSG00000068154 (TF-TG) ENSMUSG00000037820	false
7421	TF-TG	ENSMUSG00000022479 (TF-TG) ENSMUSG00000024803	false
31996	TF-TG	ENSMUSG00000068154 (TF-TG) ENSMUSG00000037624	false
31995	TF-TG	ENSMUSG00000068154 (TF-TG) ENSMUSG00000037606	false
7419	TF-TG	ENSMUSG00000022479 (TF-TG) ENSMUSG00000024774	false
31993	TF-TG	ENSMUSG00000068154 (TF-TG) ENSMUSG00000037447	false
7417	TF-TG	ENSMUSG00000022479 (TF-TG) ENSMUSG00000024743	false
31991	TF-TG	ENSMUSG00000068154 (TF-TG) ENSMUSG00000037386	false
31990	TF-TG	ENSMUSG00000068154 (TF-TG) ENSMUSG00000037379	false
31989	TF-TG	ENSMUSG00000068154 (TF-TG) ENSMUSG00000037235	false
31988	TF-TG	ENSMUSG00000068154 (TF-TG) ENSMUSG00000037169	false
7411	TF-TG	ENSMUSG00000022479 (TF-TG) ENSMUSG00000024665	false
31986	TF-TG	ENSMUSG00000068154 (TF-TG) ENSMUSG00000037071	false
31985	TF-TG	ENSMUSG00000068154 (TF-TG) ENSMUSG00000036944	false
7408	TF-TG	ENSMUSG00000022479 (TF-TG) ENSMUSG00000024601	false
7403	TF-TG	ENSMUSG00000022479 (TF-TG) ENSMUSG00000024552	false
31978	TF-TG	ENSMUSG00000068154 (TF-TG) ENSMUSG00000035901	false
7401	TF-TG	ENSMUSG00000022479 (TF-TG) ENSMUSG00000024525	false
31975	TF-TG	ENSMUSG00000068154 (TF-TG) ENSMUSG00000035441	false
7399	TF-TG	ENSMUSG00000022479 (TF-TG) ENSMUSG00000024516	false
31971	TF-TG	ENSMUSG00000068154 (TF-TG) ENSMUSG00000035158	false
7391	TF-TG	ENSMUSG00000022479 (TF-TG) ENSMUSG00000024378	false
31965	TF-TG	ENSMUSG00000068154 (TF-TG) ENSMUSG00000034773	false
7389	TF-TG	ENSMUSG00000022479 (TF-TG) ENSMUSG00000024354	false
31964	TF-TG	ENSMUSG00000068154 (TF-TG) ENSMUSG00000034768	false
7387	TF-TG	ENSMUSG00000022479 (TF-TG) ENSMUSG00000024349	false
31961	TF-TG	ENSMUSG00000068154 (TF-TG) ENSMUSG00000034116	false
31957	TF-TG	ENSMUSG00000068154 (TF-TG) ENSMUSG00000033530	false
7381	TF-TG	ENSMUSG00000022479 (TF-TG) ENSMUSG00000024232	false
31956	TF-TG	ENSMUSG00000068154 (TF-TG) ENSMUSG00000033287	false
31954	TF-TG	ENSMUSG00000068154 (TF-TG) ENSMUSG00000033256	false
7378	TF-TG	ENSMUSG00000022479 (TF-TG) ENSMUSG00000024124	false
31953	TF-TG	ENSMUSG00000068154 (TF-TG) ENSMUSG00000033161	false
31952	TF-TG	ENSMUSG00000068154 (TF-TG) ENSMUSG00000033107	false
31950	TF-TG	ENSMUSG00000068154 (TF-TG) ENSMUSG00000032978	false
7373	TF-TG	ENSMUSG00000022479 (TF-TG) ENSMUSG00000024074	false
31948	TF-TG	ENSMUSG00000068154 (TF-TG) ENSMUSG00000032849	false
7372	TF-TG	ENSMUSG00000022479 (TF-TG) ENSMUSG00000024066	false
31946	TF-TG	ENSMUSG00000068154 (TF-TG) ENSMUSG00000032783	false
31944	TF-TG	ENSMUSG00000068154 (TF-TG) ENSMUSG00000032754	false
7368	TF-TG	ENSMUSG00000022479 (TF-TG) ENSMUSG00000024033	false
7367	TF-TG	ENSMUSG00000022479 (TF-TG) ENSMUSG00000024030	false
7364	TF-TG	ENSMUSG00000022479 (TF-TG) ENSMUSG00000024013	false
31937	TF-TG	ENSMUSG00000068154 (TF-TG) ENSMUSG00000032314	false
31935	TF-TG	ENSMUSG00000068154 (TF-TG) ENSMUSG00000032245	false
31929	TF-TG	ENSMUSG00000068154 (TF-TG) ENSMUSG00000031925	false
31928	TF-TG	ENSMUSG00000068154 (TF-TG) ENSMUSG00000031903	false
31927	TF-TG	ENSMUSG00000068154 (TF-TG) ENSMUSG00000031891	false
31926	TF-TG	ENSMUSG00000068154 (TF-TG) ENSMUSG00000031827	false
31923	TF-TG	ENSMUSG00000068154 (TF-TG) ENSMUSG00000031765	false
31922	TF-TG	ENSMUSG00000068154 (TF-TG) ENSMUSG00000031668	false
7343	TF-TG	ENSMUSG00000022479 (TF-TG) ENSMUSG00000023224	false
7342	TF-TG	ENSMUSG00000022479 (TF-TG) ENSMUSG00000023122	false
31917	TF-TG	ENSMUSG00000068154 (TF-TG) ENSMUSG00000031520	false
7338	TF-TG	ENSMUSG00000022479 (TF-TG) ENSMUSG00000023043	false
7337	TF-TG	ENSMUSG00000022479 (TF-TG) ENSMUSG00000023032	false
7336	TF-TG	ENSMUSG00000022479 (TF-TG) ENSMUSG00000023017	false
31911	TF-TG	ENSMUSG00000068154 (TF-TG) ENSMUSG00000030769	false
7334	TF-TG	ENSMUSG00000022479 (TF-TG) ENSMUSG00000023008	false
31908	TF-TG	ENSMUSG00000068154 (TF-TG) ENSMUSG00000030155	false
7332	TF-TG	ENSMUSG00000022479 (TF-TG) ENSMUSG00000022995	false
31907	TF-TG	ENSMUSG00000068154 (TF-TG) ENSMUSG00000029847	false
7331	TF-TG	ENSMUSG00000022479 (TF-TG) ENSMUSG00000022947	false
31906	TF-TG	ENSMUSG00000068154 (TF-TG) ENSMUSG00000029769	false
7330	TF-TG	ENSMUSG00000022479 (TF-TG) ENSMUSG00000022938	false
7329	TF-TG	ENSMUSG00000022479 (TF-TG) ENSMUSG00000022900	false
7327	TF-TG	ENSMUSG00000022479 (TF-TG) ENSMUSG00000022864	false
31902	TF-TG	ENSMUSG00000068154 (TF-TG) ENSMUSG00000029674	false
31901	TF-TG	ENSMUSG00000068154 (TF-TG) ENSMUSG00000029560	false
7324	TF-TG	ENSMUSG00000022479 (TF-TG) ENSMUSG00000022836	false
31899	TF-TG	ENSMUSG00000068154 (TF-TG) ENSMUSG00000029330	false
7319	TF-TG	ENSMUSG00000022479 (TF-TG) ENSMUSG00000022769	false
31891	TF-TG	ENSMUSG00000068154 (TF-TG) ENSMUSG00000028634	false
31890	TF-TG	ENSMUSG00000068154 (TF-TG) ENSMUSG00000028542	false
7314	TF-TG	ENSMUSG00000022479 (TF-TG) ENSMUSG00000022707	false
31888	TF-TG	ENSMUSG00000068154 (TF-TG) ENSMUSG00000028517	false
31887	TF-TG	ENSMUSG00000068154 (TF-TG) ENSMUSG00000028415	false
31886	TF-TG	ENSMUSG00000068154 (TF-TG) ENSMUSG00000028341	false
31885	TF-TG	ENSMUSG00000068154 (TF-TG) ENSMUSG00000028327	false
31884	TF-TG	ENSMUSG00000068154 (TF-TG) ENSMUSG00000028186	false
7308	TF-TG	ENSMUSG00000022479 (TF-TG) ENSMUSG00000022629	false
7307	TF-TG	ENSMUSG00000022479 (TF-TG) ENSMUSG00000022621	false
31880	TF-TG	ENSMUSG00000068154 (TF-TG) ENSMUSG00000027931	false
7304	TF-TG	ENSMUSG00000022479 (TF-TG) ENSMUSG00000022555	false
31879	TF-TG	ENSMUSG00000068154 (TF-TG) ENSMUSG00000027883	false
31878	TF-TG	ENSMUSG00000068154 (TF-TG) ENSMUSG00000027799	false
7302	TF-TG	ENSMUSG00000022479 (TF-TG) ENSMUSG00000022546	false
31876	TF-TG	ENSMUSG00000068154 (TF-TG) ENSMUSG00000027746	false
31867	TF-TG	ENSMUSG00000068154 (TF-TG) ENSMUSG00000027358	false
7290	TF-TG	ENSMUSG00000022479 (TF-TG) ENSMUSG00000022364	false
7285	TF-TG	ENSMUSG00000022479 (TF-TG) ENSMUSG00000022253	false
7284	TF-TG	ENSMUSG00000022479 (TF-TG) ENSMUSG00000022235	false
7282	TF-TG	ENSMUSG00000022479 (TF-TG) ENSMUSG00000022217	false
31856	TF-TG	ENSMUSG00000068154 (TF-TG) ENSMUSG00000026649	false
31855	TF-TG	ENSMUSG00000068154 (TF-TG) ENSMUSG00000026520	false
7279	TF-TG	ENSMUSG00000022479 (TF-TG) ENSMUSG00000022208	false
7278	TF-TG	ENSMUSG00000022479 (TF-TG) ENSMUSG00000022180	false
31853	TF-TG	ENSMUSG00000068154 (TF-TG) ENSMUSG00000026447	false
31851	TF-TG	ENSMUSG00000068154 (TF-TG) ENSMUSG00000026405	false
7275	TF-TG	ENSMUSG00000022479 (TF-TG) ENSMUSG00000022148	false
7274	TF-TG	ENSMUSG00000022479 (TF-TG) ENSMUSG00000022136	false
31847	TF-TG	ENSMUSG00000068154 (TF-TG) ENSMUSG00000026170	false
31846	TF-TG	ENSMUSG00000068154 (TF-TG) ENSMUSG00000026072	false
7270	TF-TG	ENSMUSG00000022479 (TF-TG) ENSMUSG00000022094	false
31843	TF-TG	ENSMUSG00000068154 (TF-TG) ENSMUSG00000025790	false
7262	TF-TG	ENSMUSG00000022479 (TF-TG) ENSMUSG00000021986	false
31837	TF-TG	ENSMUSG00000068154 (TF-TG) ENSMUSG00000025279	false
7261	TF-TG	ENSMUSG00000022479 (TF-TG) ENSMUSG00000021957	false
31836	TF-TG	ENSMUSG00000068154 (TF-TG) ENSMUSG00000025203	false
7260	TF-TG	ENSMUSG00000022479 (TF-TG) ENSMUSG00000021947	false
31834	TF-TG	ENSMUSG00000068154 (TF-TG) ENSMUSG00000025176	false
7258	TF-TG	ENSMUSG00000022479 (TF-TG) ENSMUSG00000021876	false
31833	TF-TG	ENSMUSG00000068154 (TF-TG) ENSMUSG00000025154	false
7257	TF-TG	ENSMUSG00000022479 (TF-TG) ENSMUSG00000021838	false
7256	TF-TG	ENSMUSG00000022479 (TF-TG) ENSMUSG00000021831	false
31831	TF-TG	ENSMUSG00000068154 (TF-TG) ENSMUSG00000025027	false
7255	TF-TG	ENSMUSG00000022479 (TF-TG) ENSMUSG00000021822	false
7254	TF-TG	ENSMUSG00000022479 (TF-TG) ENSMUSG00000021806	false
31829	TF-TG	ENSMUSG00000068154 (TF-TG) ENSMUSG00000025025	false
31825	TF-TG	ENSMUSG00000068154 (TF-TG) ENSMUSG00000024601	false
7245	TF-TG	ENSMUSG00000022479 (TF-TG) ENSMUSG00000021684	false
31820	TF-TG	ENSMUSG00000068154 (TF-TG) ENSMUSG00000024525	false
31819	TF-TG	ENSMUSG00000068154 (TF-TG) ENSMUSG00000024516	false
7240	TF-TG	ENSMUSG00000022479 (TF-TG) ENSMUSG00000021559	false
31815	TF-TG	ENSMUSG00000068154 (TF-TG) ENSMUSG00000024232	false
31814	TF-TG	ENSMUSG00000068154 (TF-TG) ENSMUSG00000024193	false
7238	TF-TG	ENSMUSG00000022479 (TF-TG) ENSMUSG00000021539	false
7237	TF-TG	ENSMUSG00000022479 (TF-TG) ENSMUSG00000021477	false
7236	TF-TG	ENSMUSG00000022479 (TF-TG) ENSMUSG00000021453	false
31811	TF-TG	ENSMUSG00000068154 (TF-TG) ENSMUSG00000024124	false
7233	TF-TG	ENSMUSG00000022479 (TF-TG) ENSMUSG00000021364	false
7230	TF-TG	ENSMUSG00000022479 (TF-TG) ENSMUSG00000021280	false
7227	TF-TG	ENSMUSG00000022479 (TF-TG) ENSMUSG00000021221	false
31800	TF-TG	ENSMUSG00000068154 (TF-TG) ENSMUSG00000023224	false
31799	TF-TG	ENSMUSG00000068154 (TF-TG) ENSMUSG00000023032	false
31798	TF-TG	ENSMUSG00000068154 (TF-TG) ENSMUSG00000023017	false
7222	TF-TG	ENSMUSG00000022479 (TF-TG) ENSMUSG00000021196	false
31797	TF-TG	ENSMUSG00000068154 (TF-TG) ENSMUSG00000023008	false
31796	TF-TG	ENSMUSG00000068154 (TF-TG) ENSMUSG00000022947	false
[truncated: 314 more rows]
