# Supplementary material for: Regulatory network analysis of Paneth cell and goblet cell enriched gut organoids using transcriptomics approaches
Source: Royal Society of Chemistry journal article supplement (doi:10.1039/c9mo00130a), 2019-12-10
Supplement: c9mo00130a1.cys [file c9mo00130a1.cys › CytoscapeSession-2019_09_26-22_01/tables/40205-1%3A+Cluster+2+%28Score%3A+7.03%29/LOCAL_ATTRS-org.cytoscape.model.CyNode-1%3A+Cluster+2+%28Score%3A+7.03%29+default+node.cytable]

CyCSV-Version	1
SUID	name	selected
java.lang.Long	java.lang.String	java.lang.Boolean
1: Cluster 2 (Score: 7.03) default node
2077	ENSMUSG00000046841	false
1051	ENSMUSG00000043639	false
2075	ENSMUSG00000046688	false
1050	ENSMUSG00000043004	false
1049	ENSMUSG00000042647	false
1048	ENSMUSG00000039934	false
2070	ENSMUSG00000046447	false
2067	ENSMUSG00000046295	false
1041	ENSMUSG00000036913	false
1036	ENSMUSG00000034858	false
2060	ENSMUSG00000045667	false
1034	ENSMUSG00000034579	false
2053	ENSMUSG00000045007	false
1029	ENSMUSG00000031791	false
2047	ENSMUSG00000044456	false
1022	ENSMUSG00000026764	false
1016	ENSMUSG00000025027	false
1015	ENSMUSG00000024033	false
1014	ENSMUSG00000023224	false
1013	ENSMUSG00000022769	false
2035	ENSMUSG00000043953	false
1006	ENSMUSG00000019796	false
2029	ENSMUSG00000043391	false
1004	ENSMUSG00000017652	false
1003	ENSMUSG00000014164	false
1001	ENSMUSG00000006494	false
996	ENSMUSG00000004113	false
2020	ENSMUSG00000042797	false
993	ENSMUSG00000024030	false
991	ENSMUSG00000005373	false
985	ENSMUSG00000110266	false
984	ENSMUSG00000110086	false
983	ENSMUSG00000108348	false
2006	ENSMUSG00000042195	false
2005	ENSMUSG00000042179	false
977	ENSMUSG00000096472	false
976	ENSMUSG00000095105	false
974	ENSMUSG00000094928	false
972	ENSMUSG00000094091	false
971	ENSMUSG00000091387	false
967	ENSMUSG00000081769	false
1987	ENSMUSG00000041202	false
962	ENSMUSG00000078954	false
959	ENSMUSG00000078650	false
1982	ENSMUSG00000040998	false
952	ENSMUSG00000074476	false
1975	ENSMUSG00000040640	false
951	ENSMUSG00000074282	false
950	ENSMUSG00000074183	false
1973	ENSMUSG00000040605	false
946	ENSMUSG00000072949	false
945	ENSMUSG00000072946	false
1968	ENSMUSG00000040345	false
941	ENSMUSG00000072115	false
940	ENSMUSG00000071847	false
938	ENSMUSG00000071537	false
1961	ENSMUSG00000040127	false
936	ENSMUSG00000071226	false
934	ENSMUSG00000070777	false
932	ENSMUSG00000070687	false
1955	ENSMUSG00000039943	false
931	ENSMUSG00000070407	false
928	ENSMUSG00000069255	false
927	ENSMUSG00000069170	false
1951	ENSMUSG00000039648	false
926	ENSMUSG00000069114	false
925	ENSMUSG00000068742	false
1948	ENSMUSG00000039616	false
1941	ENSMUSG00000039323	false
1939	ENSMUSG00000039232	false
913	ENSMUSG00000064262	false
1934	ENSMUSG00000039158	false
910	ENSMUSG00000064215	false
909	ENSMUSG00000064202	false
908	ENSMUSG00000064090	false
1931	ENSMUSG00000039114	false
903	ENSMUSG00000063229	false
1927	ENSMUSG00000038903	false
1926	ENSMUSG00000038836	false
899	ENSMUSG00000062248	false
898	ENSMUSG00000062078	false
1922	ENSMUSG00000038745	false
897	ENSMUSG00000062070	false
896	ENSMUSG00000061607	false
895	ENSMUSG00000061578	false
894	ENSMUSG00000061531	false
892	ENSMUSG00000060962	false
1912	ENSMUSG00000038486	false
1911	ENSMUSG00000038463	false
887	ENSMUSG00000060176	false
1910	ENSMUSG00000038422	false
884	ENSMUSG00000059824	false
1908	ENSMUSG00000038371	false
882	ENSMUSG00000059540	false
881	ENSMUSG00000059493	false
1903	ENSMUSG00000038042	false
876	ENSMUSG00000058672	false
873	ENSMUSG00000058145	false
1895	ENSMUSG00000037797	false
868	ENSMUSG00000057092	false
865	ENSMUSG00000056737	false
862	ENSMUSG00000056529	false
1886	ENSMUSG00000037315	false
860	ENSMUSG00000056069	false
1881	ENSMUSG00000036944	false
1877	ENSMUSG00000036880	false
852	ENSMUSG00000054967	false
1875	ENSMUSG00000036813	false
851	ENSMUSG00000054893	false
850	ENSMUSG00000054855	false
1871	ENSMUSG00000036526	false
845	ENSMUSG00000054474	false
1868	ENSMUSG00000036437	false
843	ENSMUSG00000054150	false
1867	ENSMUSG00000036368	false
842	ENSMUSG00000053846	false
839	ENSMUSG00000053765	false
837	ENSMUSG00000053580	false
836	ENSMUSG00000053470	false
1860	ENSMUSG00000036216	false
835	ENSMUSG00000053460	false
834	ENSMUSG00000053334	false
1857	ENSMUSG00000036123	false
831	ENSMUSG00000053080	false
827	ENSMUSG00000052560	false
824	ENSMUSG00000052105	false
1845	ENSMUSG00000035711	false
820	ENSMUSG00000051727	false
1842	ENSMUSG00000035561	false
818	ENSMUSG00000051343	false
815	ENSMUSG00000050777	false
814	ENSMUSG00000050737	false
813	ENSMUSG00000050721	false
1835	ENSMUSG00000035239	false
807	ENSMUSG00000050064	false
806	ENSMUSG00000049878	false
1827	ENSMUSG00000034768	false
802	ENSMUSG00000049588	false
801	ENSMUSG00000049580	false
1825	ENSMUSG00000034687	false
796	ENSMUSG00000049184	false
790	ENSMUSG00000048458	false
788	ENSMUSG00000048440	false
787	ENSMUSG00000048376	false
1811	ENSMUSG00000033917	false
785	ENSMUSG00000048217	false
784	ENSMUSG00000048058	false
783	ENSMUSG00000047976	false
781	ENSMUSG00000047907	false
780	ENSMUSG00000047797	false
1803	ENSMUSG00000033610	false
2826	mmu-miR-125b-5p	false
774	ENSMUSG00000047139	false
772	ENSMUSG00000046814	false
1793	ENSMUSG00000033177	false
1792	ENSMUSG00000033147	false
767	ENSMUSG00000046546	false
1791	ENSMUSG00000033107	false
1790	ENSMUSG00000033083	false
765	ENSMUSG00000046242	false
764	ENSMUSG00000046223	false
762	ENSMUSG00000046093	false
761	ENSMUSG00000046070	false
1784	ENSMUSG00000032855	false
760	ENSMUSG00000046058	false
757	ENSMUSG00000045629	false
755	ENSMUSG00000045382	false
754	ENSMUSG00000045349	false
751	ENSMUSG00000045094	false
748	ENSMUSG00000044674	false
747	ENSMUSG00000044646	false
1770	ENSMUSG00000032431	false
1768	ENSMUSG00000032380	false
742	ENSMUSG00000044254	false
739	ENSMUSG00000044072	false
1759	ENSMUSG00000032278	false
734	ENSMUSG00000043068	false
726	ENSMUSG00000042333	false
724	ENSMUSG00000042303	false
723	ENSMUSG00000042258	false
1746	ENSMUSG00000032026	false
1745	ENSMUSG00000032014	false
721	ENSMUSG00000042115	false
720	ENSMUSG00000042109	false
1743	ENSMUSG00000031957	false
718	ENSMUSG00000042096	false
716	ENSMUSG00000042035	false
715	ENSMUSG00000041930	false
1739	ENSMUSG00000031891	false
713	ENSMUSG00000041733	false
709	ENSMUSG00000041548	false
708	ENSMUSG00000041431	false
707	ENSMUSG00000041268	false
706	ENSMUSG00000041219	false
1729	ENSMUSG00000031765	false
1728	ENSMUSG00000031725	false
2748	mmu-miR-1945	false
699	ENSMUSG00000041064	false
698	ENSMUSG00000041058	false
697	ENSMUSG00000041040	false
1718	ENSMUSG00000031520	false
694	ENSMUSG00000040918	false
2741	ENSMUSG00000044522	false
693	ENSMUSG00000040852	false
2740	ENSMUSG00000085329	false
691	ENSMUSG00000040631	false
689	ENSMUSG00000040462	false
688	ENSMUSG00000040447	false
687	ENSMUSG00000040433	false
1711	ENSMUSG00000031375	false
1710	ENSMUSG00000031367	false
686	ENSMUSG00000040430	false
2733	ENSMUSG00000075010	false
2732	ENSMUSG00000102106	false
683	ENSMUSG00000040280	false
679	ENSMUSG00000040084	false
678	ENSMUSG00000039911	false
2725	ENSMUSG00000111528	false
2723	ENSMUSG00000099025	false
2721	ENSMUSG00000109084	false
673	ENSMUSG00000039683	false
672	ENSMUSG00000039470	false
1692	ENSMUSG00000030762	false
1690	ENSMUSG00000030717	false
666	ENSMUSG00000039126	false
665	ENSMUSG00000039087	false
663	ENSMUSG00000039050	false
1687	ENSMUSG00000030543	false
1686	ENSMUSG00000030528	false
2708	ENSMUSG00000097039	false
659	ENSMUSG00000038884	false
2705	ENSMUSG00000097932	false
657	ENSMUSG00000038777	false
1680	ENSMUSG00000030287	false
1679	ENSMUSG00000030246	false
654	ENSMUSG00000038599	false
1676	ENSMUSG00000030155	false
651	ENSMUSG00000038451	false
650	ENSMUSG00000038379	false
2697	ENSMUSG00000097277	false
1673	ENSMUSG00000030048	false
648	ENSMUSG00000038349	false
2695	ENSMUSG00000097287	false
2694	ENSMUSG00000097908	false
2693	ENSMUSG00000097561	false
644	ENSMUSG00000038175	false
2689	ENSMUSG00000085183	false
638	ENSMUSG00000037820	false
2685	ENSMUSG00000104011	false
633	ENSMUSG00000037664	false
631	ENSMUSG00000037624	false
630	ENSMUSG00000037621	false
629	ENSMUSG00000037606	false
1653	ENSMUSG00000029522	false
627	ENSMUSG00000037579	false
1651	ENSMUSG00000029470	false
625	ENSMUSG00000037447	false
1647	ENSMUSG00000029413	false
621	ENSMUSG00000037386	false
1644	ENSMUSG00000029370	false
620	ENSMUSG00000037379	false
619	ENSMUSG00000037235	false
1642	ENSMUSG00000029343	false
617	ENSMUSG00000037169	false
616	ENSMUSG00000037071	false
611	ENSMUSG00000036887	false
1634	ENSMUSG00000029173	false
609	ENSMUSG00000036863	false
602	ENSMUSG00000035901	false
1624	ENSMUSG00000028874	false
598	ENSMUSG00000035683	false
1620	ENSMUSG00000028649	false
594	ENSMUSG00000035441	false
592	ENSMUSG00000035357	false
1616	ENSMUSG00000028555	false
591	ENSMUSG00000035279	false
586	ENSMUSG00000035105	false
1609	ENSMUSG00000028327	false
582	ENSMUSG00000034773	false
581	ENSMUSG00000034684	false
576	ENSMUSG00000034413	false
574	ENSMUSG00000034265	false
572	ENSMUSG00000034116	false
1595	ENSMUSG00000028076	false
568	ENSMUSG00000033871	false
564	ENSMUSG00000033685	false
563	ENSMUSG00000033530	false
560	ENSMUSG00000033318	false
559	ENSMUSG00000033287	false
1582	ENSMUSG00000027799	false
558	ENSMUSG00000033256	false
557	ENSMUSG00000033209	false
556	ENSMUSG00000033161	false
1578	ENSMUSG00000027737	false
554	ENSMUSG00000033105	false
1577	ENSMUSG00000027692	false
552	ENSMUSG00000032978	false
547	ENSMUSG00000032849	false
546	ENSMUSG00000032783	false
545	ENSMUSG00000032754	false
544	ENSMUSG00000032740	false
1567	ENSMUSG00000027435	false
543	ENSMUSG00000032733	false
541	ENSMUSG00000032656	false
535	ENSMUSG00000032411	false
1559	ENSMUSG00000027316	false
530	ENSMUSG00000032314	false
529	ENSMUSG00000032294	false
528	ENSMUSG00000032245	false
1552	ENSMUSG00000027173	false
525	ENSMUSG00000032018	false
1549	ENSMUSG00000027068	false
1548	ENSMUSG00000026980	false
523	ENSMUSG00000031980	false
521	ENSMUSG00000031925	false
520	ENSMUSG00000031903	false
519	ENSMUSG00000031845	false
518	ENSMUSG00000031827	false
1541	ENSMUSG00000026820	false
515	ENSMUSG00000031668	false
1538	ENSMUSG00000026773	false
1531	ENSMUSG00000026546	false
507	ENSMUSG00000031538	false
506	ENSMUSG00000031453	false
1525	ENSMUSG00000026447	false
1523	ENSMUSG00000026415	false
1522	ENSMUSG00000026405	false
492	ENSMUSG00000030772	false
491	ENSMUSG00000030769	false
1513	ENSMUSG00000026227	false
1512	ENSMUSG00000026223	false
1508	ENSMUSG00000026170	false
484	ENSMUSG00000030329	false
1505	ENSMUSG00000026077	false
479	ENSMUSG00000030074	false
476	ENSMUSG00000029847	false
475	ENSMUSG00000029814	false
474	ENSMUSG00000029772	false
473	ENSMUSG00000029769	false
1496	ENSMUSG00000025790	false
471	ENSMUSG00000029674	false
1494	ENSMUSG00000025758	false
468	ENSMUSG00000029560	false
466	ENSMUSG00000029484	false
1489	ENSMUSG00000025608	false
465	ENSMUSG00000029330	false
464	ENSMUSG00000029177	false
462	ENSMUSG00000029161	false
456	ENSMUSG00000028943	false
1475	ENSMUSG00000025348	false
1474	ENSMUSG00000025279	false
1471	ENSMUSG00000025203	false
446	ENSMUSG00000028634	false
445	ENSMUSG00000028602	false
444	ENSMUSG00000028576	false
1466	ENSMUSG00000025161	false
442	ENSMUSG00000028542	false
1465	ENSMUSG00000025154	false
441	ENSMUSG00000028517	false
436	ENSMUSG00000028341	false
1457	ENSMUSG00000025075	false
432	ENSMUSG00000028211	false
431	ENSMUSG00000028186	false
430	ENSMUSG00000027995	false
1454	ENSMUSG00000024990	false
429	ENSMUSG00000027954	false
1453	ENSMUSG00000024981	false
427	ENSMUSG00000027931	false
426	ENSMUSG00000027907	false
425	ENSMUSG00000027890	false
424	ENSMUSG00000027883	false
1446	ENSMUSG00000024846	false
422	ENSMUSG00000027750	false
421	ENSMUSG00000027746	false
1443	ENSMUSG00000024803	false
1442	ENSMUSG00000024774	false
416	ENSMUSG00000027534	false
415	ENSMUSG00000027514	false
1438	ENSMUSG00000024665	false
1436	ENSMUSG00000024601	false
410	ENSMUSG00000027358	false
1433	ENSMUSG00000024525	false
409	ENSMUSG00000027333	false
407	ENSMUSG00000027313	false
404	ENSMUSG00000027006	false
400	ENSMUSG00000026921	false
399	ENSMUSG00000026880	false
398	ENSMUSG00000026879	false
1422	ENSMUSG00000024354	false
396	ENSMUSG00000026782	false
395	ENSMUSG00000026730	false
394	ENSMUSG00000026649	false
393	ENSMUSG00000026605	false
392	ENSMUSG00000026604	false
1414	ENSMUSG00000024124	false
390	ENSMUSG00000026520	false
389	ENSMUSG00000026509	false
1412	ENSMUSG00000024066	false
1406	ENSMUSG00000024013	false
380	ENSMUSG00000026107	false
379	ENSMUSG00000026103	false
377	ENSMUSG00000026072	false
374	ENSMUSG00000025959	false
373	ENSMUSG00000025921	false
372	ENSMUSG00000025893	false
370	ENSMUSG00000025780	false
1394	ENSMUSG00000023122	false
2415	ENSMUSG00000109946	false
1389	ENSMUSG00000023043	false
2412	ENSMUSG00000098715	false
1387	ENSMUSG00000022938	false
1386	ENSMUSG00000022900	false
362	ENSMUSG00000025477	false
356	ENSMUSG00000025176	false
1379	ENSMUSG00000022707	false
354	ENSMUSG00000025037	false
352	ENSMUSG00000025025	false
1376	ENSMUSG00000022621	false
2398	ENSMUSG00000091813	false
2396	ENSMUSG00000090891	false
345	ENSMUSG00000024887	false
342	ENSMUSG00000024743	false
2384	ENSMUSG00000079471	false
334	ENSMUSG00000024552	false
2381	ENSMUSG00000079057	false
332	ENSMUSG00000024516	false
330	ENSMUSG00000024378	false
1353	ENSMUSG00000022180	false
328	ENSMUSG00000024349	false
326	ENSMUSG00000024232	false
2373	ENSMUSG00000078566	false
325	ENSMUSG00000024193	false
2372	ENSMUSG00000078515	false
1346	ENSMUSG00000021986	false
321	ENSMUSG00000024074	false
1341	ENSMUSG00000021838	false
2365	ENSMUSG00000075702	false
2362	ENSMUSG00000075304	false
1333	ENSMUSG00000021684	false
2355	ENSMUSG00000074796	false
307	ENSMUSG00000023032	false
2354	ENSMUSG00000074715	false
306	ENSMUSG00000023017	false
1328	ENSMUSG00000021559	false
304	ENSMUSG00000023008	false
302	ENSMUSG00000022995	false
1325	ENSMUSG00000021453	false
301	ENSMUSG00000022947	false
1324	ENSMUSG00000021364	false
299	ENSMUSG00000022864	false
297	ENSMUSG00000022836	false
2344	ENSMUSG00000074218	false
1320	ENSMUSG00000021221	false
291	ENSMUSG00000022629	false
290	ENSMUSG00000022555	false
289	ENSMUSG00000022546	false
286	ENSMUSG00000022364	false
1310	ENSMUSG00000020900	false
1309	ENSMUSG00000020875	false
283	ENSMUSG00000022253	false
282	ENSMUSG00000022235	false
280	ENSMUSG00000022217	false
2327	ENSMUSG00000072849	false
279	ENSMUSG00000022208	false
277	ENSMUSG00000022148	false
276	ENSMUSG00000022136	false
275	ENSMUSG00000022094	false
1296	ENSMUSG00000020472	false
271	ENSMUSG00000021957	false
270	ENSMUSG00000021947	false
269	ENSMUSG00000021876	false
268	ENSMUSG00000021831	false
1291	ENSMUSG00000020435	false
267	ENSMUSG00000021822	false
2314	ENSMUSG00000070332	false
266	ENSMUSG00000021806	false
1289	ENSMUSG00000020402	false
1285	ENSMUSG00000020261	false
261	ENSMUSG00000021539	false
2308	ENSMUSG00000068877	false
1284	ENSMUSG00000020230	false
260	ENSMUSG00000021477	false
2306	ENSMUSG00000068587	false
1282	ENSMUSG00000020226	false
258	ENSMUSG00000021280	false
2302	ENSMUSG00000068154	false
254	ENSMUSG00000021196	false
1277	ENSMUSG00000020092	false
2300	ENSMUSG00000067889	false
252	ENSMUSG00000021185	false
251	ENSMUSG00000021108	false
1275	ENSMUSG00000020034	false
250	ENSMUSG00000021094	false
249	ENSMUSG00000020978	false
247	ENSMUSG00000020894	false
1271	ENSMUSG00000019945	false
246	ENSMUSG00000020892	false
245	ENSMUSG00000020872	false
243	ENSMUSG00000020838	false
241	ENSMUSG00000020741	false
240	ENSMUSG00000020715	false
1264	ENSMUSG00000019838	false
2285	ENSMUSG00000064373	false
1260	ENSMUSG00000019232	false
235	ENSMUSG00000020471	false
233	ENSMUSG00000020407	false
231	ENSMUSG00000020376	false
1255	ENSMUSG00000018906	false
2279	ENSMUSG00000064140	false
230	ENSMUSG00000020363	false
227	ENSMUSG00000020277	false
1251	ENSMUSG00000018752	false
2273	ENSMUSG00000063568	false
224	ENSMUSG00000020015	false
223	ENSMUSG00000020014	false
1246	ENSMUSG00000018411	false
222	ENSMUSG00000020009	false
220	ENSMUSG00000019986	false
2268	ENSMUSG00000062753	false
219	ENSMUSG00000019942	false
218	ENSMUSG00000019916	false
2265	ENSMUSG00000062312	false
1239	ENSMUSG00000017453	false
212	ENSMUSG00000019564	false
1236	ENSMUSG00000016541	false
211	ENSMUSG00000019194	false
208	ENSMUSG00000018983	false
2256	ENSMUSG00000061414	false
2254	ENSMUSG00000060961	false
204	ENSMUSG00000018566	false
202	ENSMUSG00000018334	false
2249	ENSMUSG00000060550	false
201	ENSMUSG00000018042	false
2248	ENSMUSG00000060548	false
1223	ENSMUSG00000014599	false
199	ENSMUSG00000017716	false
198	ENSMUSG00000017692	false
196	ENSMUSG00000017466	false
195	ENSMUSG00000017446	false
2243	ENSMUSG00000059713	false
193	ENSMUSG00000017165	false
191	ENSMUSG00000016758	false
1215	ENSMUSG00000011034	false
1214	ENSMUSG00000011008	false
2236	ENSMUSG00000058794	false
186	ENSMUSG00000015850	false
1209	ENSMUSG00000010122	false
2232	ENSMUSG00000058216	false
1208	ENSMUSG00000010021	false
183	ENSMUSG00000015647	false
1207	ENSMUSG00000009646	false
181	ENSMUSG00000015396	false
179	ENSMUSG00000015112	false
1200	ENSMUSG00000007207	false
176	ENSMUSG00000014351	false
175	ENSMUSG00000014303	false
174	ENSMUSG00000013846	false
173	ENSMUSG00000013089	false
172	ENSMUSG00000012126	false
2218	ENSMUSG00000056973	false
2217	ENSMUSG00000056888	false
169	ENSMUSG00000011148	false
2216	ENSMUSG00000056758	false
167	ENSMUSG00000010362	false
165	ENSMUSG00000009739	false
1186	ENSMUSG00000005470	false
2209	ENSMUSG00000056413	false
159	ENSMUSG00000006731	false
158	ENSMUSG00000006642	false
1182	ENSMUSG00000004880	false
2203	ENSMUSG00000055675	false
2200	ENSMUSG00000055538	false
2199	ENSMUSG00000055493	false
150	ENSMUSG00000005873	false
149	ENSMUSG00000005611	false
148	ENSMUSG00000005413	false
2194	ENSMUSG00000055114	false
146	ENSMUSG00000005320	false
1168	ENSMUSG00000002997	false
2192	ENSMUSG00000054958	false
144	ENSMUSG00000004951	false
2191	ENSMUSG00000054932	false
143	ENSMUSG00000004864	false
2190	ENSMUSG00000054920	false
140	ENSMUSG00000004328	false
139	ENSMUSG00000004270	false
138	ENSMUSG00000004044	false
136	ENSMUSG00000003545	false
135	ENSMUSG00000003541	false
133	ENSMUSG00000003420	false
2181	ENSMUSG00000054200	false
131	ENSMUSG00000003134	false
2176	ENSMUSG00000053862	false
2175	ENSMUSG00000053617	false
2174	ENSMUSG00000053604	false
1150	ENSMUSG00000001467	false
2173	ENSMUSG00000053581	false
124	ENSMUSG00000001435	false
119	ENSMUSG00000000555	false
2164	ENSMUSG00000052584	false
1139	ENSMUSG00000000791	false
115	ENSMUSG00000000126	false
2162	ENSMUSG00000052384	false
114	ENSMUSG00000000056	false
1138	ENSMUSG00000000732	false
1137	ENSMUSG00000000673	false
2160	ENSMUSG00000052353	false
108	ENSMUSG00000027544	false
107	ENSMUSG00000018909	false
106	ENSMUSG00000026398	false
1130	ENSMUSG00000000125	false
1129	ENSMUSG00000000120	false
2152	ENSMUSG00000051498	false
103	ENSMUSG00000069515	false
99	ENSMUSG00000035158	false
2147	ENSMUSG00000051314	false
1122	ENSMUSG00000052131	false
2145	ENSMUSG00000051185	false
1121	ENSMUSG00000005677	false
1120	ENSMUSG00000059142	false
1117	ENSMUSG00000018486	false
92	ENSMUSG00000054422	false
1113	ENSMUSG00000041237	false
2134	ENSMUSG00000050270	false
2133	ENSMUSG00000050240	false
83	ENSMUSG00000037583	false
2131	ENSMUSG00000050103	false
1106	ENSMUSG00000056602	false
81	ENSMUSG00000017950	false
2127	ENSMUSG00000049858	false
1102	ENSMUSG00000050592	false
77	ENSMUSG00000022479	false
1099	ENSMUSG00000048473	false
2122	ENSMUSG00000049154	false
1094	ENSMUSG00000038843	false
1093	ENSMUSG00000037936	false
2117	ENSMUSG00000048911	false
1087	ENSMUSG00000028614	false
2110	ENSMUSG00000048424	false
1086	ENSMUSG00000028415	false
2107	ENSMUSG00000048279	false
2106	ENSMUSG00000048232	false
1079	ENSMUSG00000020641	false
1076	ENSMUSG00000015745	false
2099	ENSMUSG00000047963	false
1075	ENSMUSG00000006800	false
1073	ENSMUSG00000002885	false
1071	ENSMUSG00000079037	false
1070	ENSMUSG00000070802	false
2093	ENSMUSG00000047767	false
1069	ENSMUSG00000070287	false
1068	ENSMUSG00000069622	false
1066	ENSMUSG00000066952	false
1065	ENSMUSG00000063450	false
1064	ENSMUSG00000063439	false
2084	ENSMUSG00000047501	false
1059	ENSMUSG00000053216	false
