# Supplementary material for: Regulatory network analysis of Paneth cell and goblet cell enriched gut organoids using transcriptomics approaches
Source: Royal Society of Chemistry journal article supplement (doi:10.1039/c9mo00130a), 2019-12-10
Supplement: c9mo00130a1.cys [file c9mo00130a1.cys › CytoscapeSession-2019_09_26-22_01/tables/40205-1%3A+Cluster+2+%28Score%3A+7.03%29/org.baderlab.autoannotate.annotationSet-org.cytoscape.model.CyNetwork-org.baderlab.autoannotate.annotationSet.cytable]

"CyCSV-Version","1"
"annotationSetID","active","borderColor","borderWidth","creationParams","fillColor","fontColor","fontScale","fontSize","labelColumn","labelMakerContext","labelMakerID","name","networkView.SUID","opacity","shapeType","showClusters","showLabels","useConstantFontSize"
"java.lang.Long","java.lang.Boolean","java.lang.Integer","java.lang.Integer","java.lang.String","java.lang.Integer","java.lang.Integer","java.lang.Integer","java.lang.Integer","java.util.List<java.lang.String>","java.lang.String","java.lang.String","java.lang.String","java.lang.Long","java.lang.Integer","java.lang.String","java.lang.Boolean","java.lang.Boolean","java.lang.Boolean"
"","","","","","","","","","","","","","","","","","",""
"org.baderlab.autoannotate.annotationSet","public,mutable"
