# Supplementary material for: Regulatory network analysis of Paneth cell and goblet cell enriched gut organoids using transcriptomics approaches
Source: Royal Society of Chemistry journal article supplement (doi:10.1039/c9mo00130a), 2019-12-10
Supplement: c9mo00130a1.cys [file c9mo00130a1.cys › CytoscapeSession-2019_09_26-22_01/tables/40215-1%3A+Cluster+4+%28Score%3A+4.235%29/LOCAL_ATTRS-org.cytoscape.model.CyEdge-1%3A+Cluster+4+%28Score%3A+4.235%29+default+edge.cytable]

CyCSV-Version	1
SUID	interaction	name	selected
java.lang.Long	java.lang.String	java.lang.String	java.lang.Boolean
1: Cluster 4 (Score: 4.235) default edge
37183	miRNA-mRNA	mmu-miR-19b-3p (miRNA-mRNA) ENSMUSG00000026970	false
35772	miRNA-mRNA	mmu-miR-92a-3p (miRNA-mRNA) ENSMUSG00000034663	false
37115	miRNA-mRNA	mmu-miR-19b-3p (miRNA-mRNA) ENSMUSG00000018800	false
35128	miRNA-mRNA	mmu-miR-19a-3p (miRNA-mRNA) ENSMUSG00000026970	false
39862	miRNA-mRNA	mmu-miR-30b-5p (miRNA-mRNA) ENSMUSG00000021733	false
37174	miRNA-mRNA	mmu-miR-19b-3p (miRNA-mRNA) ENSMUSG00000026094	false
39925	miRNA-mRNA	mmu-miR-30b-5p (miRNA-mRNA) ENSMUSG00000034663	false
35124	miRNA-mRNA	mmu-miR-19a-3p (miRNA-mRNA) ENSMUSG00000023905	false
37361	miRNA-mRNA	mmu-miR-19b-3p (miRNA-mRNA) ENSMUSG00000061740	false
35119	miRNA-mRNA	mmu-miR-19a-3p (miRNA-mRNA) ENSMUSG00000023050	false
37100	miRNA-mRNA	mmu-miR-19b-3p (miRNA-mRNA) ENSMUSG00000008398	false
37162	miRNA-mRNA	mmu-miR-19b-3p (miRNA-mRNA) ENSMUSG00000023905	false
37096	miRNA-mRNA	mmu-miR-19b-3p (miRNA-mRNA) ENSMUSG00000002107	false
35686	miRNA-mRNA	mmu-miR-92a-3p (miRNA-mRNA) ENSMUSG00000002107	false
37157	miRNA-mRNA	mmu-miR-19b-3p (miRNA-mRNA) ENSMUSG00000023050	false
37284	miRNA-mRNA	mmu-miR-19b-3p (miRNA-mRNA) ENSMUSG00000039031	false
37348	miRNA-mRNA	mmu-miR-19b-3p (miRNA-mRNA) ENSMUSG00000057335	false
35743	miRNA-mRNA	mmu-miR-92a-3p (miRNA-mRNA) ENSMUSG00000026970	false
35103	miRNA-mRNA	mmu-miR-19a-3p (miRNA-mRNA) ENSMUSG00000021733	false
39964	miRNA-mRNA	mmu-miR-30b-5p (miRNA-mRNA) ENSMUSG00000057335	false
39898	miRNA-mRNA	mmu-miR-30b-5p (miRNA-mRNA) ENSMUSG00000026970	false
37274	miRNA-mRNA	mmu-miR-19b-3p (miRNA-mRNA) ENSMUSG00000039607	false
35737	miRNA-mRNA	mmu-miR-92a-3p (miRNA-mRNA) ENSMUSG00000028403	false
35800	miRNA-mRNA	mmu-miR-92a-3p (miRNA-mRNA) ENSMUSG00000039607	false
39893	miRNA-mRNA	mmu-miR-30b-5p (miRNA-mRNA) ENSMUSG00000026094	false
37140	miRNA-mRNA	mmu-miR-19b-3p (miRNA-mRNA) ENSMUSG00000021733	false
39886	miRNA-mRNA	mmu-miR-30b-5p (miRNA-mRNA) ENSMUSG00000028403	false
35849	miRNA-mRNA	mmu-miR-92a-3p (miRNA-mRNA) ENSMUSG00000057335	false
35209	miRNA-mRNA	mmu-miR-19a-3p (miRNA-mRNA) ENSMUSG00000039607	false
35080	miRNA-mRNA	mmu-miR-19a-3p (miRNA-mRNA) ENSMUSG00000018800	false
39943	miRNA-mRNA	mmu-miR-30b-5p (miRNA-mRNA) ENSMUSG00000039031	false
35077	miRNA-mRNA	mmu-miR-19a-3p (miRNA-mRNA) ENSMUSG00000008398	false
35844	miRNA-mRNA	mmu-miR-92a-3p (miRNA-mRNA) ENSMUSG00000061740	false
35139	miRNA-mRNA	mmu-miR-19a-3p (miRNA-mRNA) ENSMUSG00000026094	false
39873	miRNA-mRNA	mmu-miR-30b-5p (miRNA-mRNA) ENSMUSG00000023050	false
35201	miRNA-mRNA	mmu-miR-19a-3p (miRNA-mRNA) ENSMUSG00000039031	false
