# Supplementary material for: Regulatory network analysis of Paneth cell and goblet cell enriched gut organoids using transcriptomics approaches
Source: Royal Society of Chemistry journal article supplement (doi:10.1039/c9mo00130a), 2019-12-10
Supplement: c9mo00130a1.cys [file c9mo00130a1.cys › CytoscapeSession-2019_09_26-22_01/tables/40215-1%3A+Cluster+4+%28Score%3A+4.235%29/LOCAL_ATTRS-org.cytoscape.model.CyNode-1%3A+Cluster+4+%28Score%3A+4.235%29+default+node.cytable]

CyCSV-Version	1
SUID	name	selected
java.lang.Long	java.lang.String	java.lang.Boolean
1: Cluster 4 (Score: 4.235) default node
1823	ENSMUSG00000034663	false
2430	ENSMUSG00000028403	false
2781	mmu-miR-92a-3p	false
316	ENSMUSG00000023905	false
1947	ENSMUSG00000039607	false
1083	ENSMUSG00000026094	false
2841	mmu-miR-30b-5p	false
1337	ENSMUSG00000021733	false
2805	mmu-miR-19b-3p	false
2259	ENSMUSG00000061740	false
1391	ENSMUSG00000023050	false
2766	mmu-miR-19a-3p	false
1547	ENSMUSG00000026970	false
1929	ENSMUSG00000039031	false
1161	ENSMUSG00000002107	false
1125	ENSMUSG00000008398	false
869	ENSMUSG00000057335	false
1252	ENSMUSG00000018800	false
