# Supplementary material for: Regulatory network analysis of Paneth cell and goblet cell enriched gut organoids using transcriptomics approaches
Source: Royal Society of Chemistry journal article supplement (doi:10.1039/c9mo00130a), 2019-12-10
Supplement: c9mo00130a1.cys [file c9mo00130a1.cys › CytoscapeSession-2019_09_26-22_01/tables/40225-1%3A+Cluster+5+%28Score%3A+2.667%29/LOCAL_ATTRS-org.cytoscape.model.CyEdge-1%3A+Cluster+5+%28Score%3A+2.667%29+default+edge.cytable]

"CyCSV-Version","1"
"SUID","interaction","name","selected"
"java.lang.Long","java.lang.String","java.lang.String","java.lang.Boolean"
"","","",""
"1: Cluster 5 (Score: 2.667) default edge",""
"39599","miRNA-mRNA","mmu-miR-27a-3p (miRNA-mRNA) ENSMUSG00000026395","false"
"39533","miRNA-mRNA","mmu-miR-27a-3p (miRNA-mRNA) ENSMUSG00000021175","false"
"38682","miRNA-mRNA","mmu-miR-92b-3p (miRNA-mRNA) ENSMUSG00000026395","false"
"38665","miRNA-mRNA","mmu-miR-92b-3p (miRNA-mRNA) ENSMUSG00000021175","false"
