# Supplementary material for: Regulatory network analysis of Paneth cell and goblet cell enriched gut organoids using transcriptomics approaches
Source: Royal Society of Chemistry journal article supplement (doi:10.1039/c9mo00130a), 2019-12-10
Supplement: c9mo00130a1.cys [file c9mo00130a1.cys › CytoscapeSession-2019_09_26-22_01/tables/40225-1%3A+Cluster+5+%28Score%3A+2.667%29/LOCAL_ATTRS-org.cytoscape.model.CyNetwork-1%3A+Cluster+5+%28Score%3A+2.667%29+default+network.cytable]

"CyCSV-Version","1"
"SUID","__Annotations","name","selected"
"java.lang.Long","java.util.List<java.lang.String>","java.lang.String","java.lang.Boolean"
"","mutable","",""
"1: Cluster 5 (Score: 2.667) default network",""
"40225","","1: Cluster 5 (Score: 2.667)","false"
