# Supplementary material for: Regulatory network analysis of Paneth cell and goblet cell enriched gut organoids using transcriptomics approaches
Source: Royal Society of Chemistry journal article supplement (doi:10.1039/c9mo00130a), 2019-12-10
Supplement: c9mo00130a1.cys [file c9mo00130a1.cys › CytoscapeSession-2019_09_26-22_01/tables/40225-1%3A+Cluster+5+%28Score%3A+2.667%29/org.baderlab.autoannotate.cluster-org.cytoscape.model.CyNetwork-org.baderlab.autoannotate.cluster.cytable]

"CyCSV-Version","1"
"clusterID","annotationSetID","collapsed","label","nodes.SUID","shapeID","textID"
"java.lang.Long","java.lang.Long","java.lang.Boolean","java.lang.String","java.util.List<java.lang.Long>","java.lang.String","java.lang.String"
"","","","","","",""
"org.baderlab.autoannotate.cluster","public,mutable"
