# Supplementary material for: Regulatory network analysis of Paneth cell and goblet cell enriched gut organoids using transcriptomics approaches
Source: Royal Society of Chemistry journal article supplement (doi:10.1039/c9mo00130a), 2019-12-10
Supplement: c9mo00130a1.cys [file c9mo00130a1.cys › CytoscapeSession-2019_09_26-22_01/tables/40235-1%3A+Cluster+3+%28Score%3A+6.145%29/HIDDEN-org.cytoscape.model.CyNetwork-40235+hidden+network.cytable]

"CyCSV-Version","1"
"SUID"
"java.lang.Long"
""
"40235 hidden network",""
"40235"
