# Supplementary material for: Regulatory network analysis of Paneth cell and goblet cell enriched gut organoids using transcriptomics approaches
Source: Royal Society of Chemistry journal article supplement (doi:10.1039/c9mo00130a), 2019-12-10
Supplement: c9mo00130a1.cys [file c9mo00130a1.cys › CytoscapeSession-2019_09_26-22_01/tables/40235-1%3A+Cluster+3+%28Score%3A+6.145%29/LOCAL_ATTRS-org.cytoscape.model.CyEdge-1%3A+Cluster+3+%28Score%3A+6.145%29+default+edge.cytable]

CyCSV-Version	1
SUID	interaction	name	selected
java.lang.Long	java.lang.String	java.lang.String	java.lang.Boolean
1: Cluster 3 (Score: 6.145) default edge
31039	TF-TG	ENSMUSG00000038692 (TF-TG) ENSMUSG00000027254	false
31038	TF-TG	ENSMUSG00000038692 (TF-TG) ENSMUSG00000027219	false
31037	TF-TG	ENSMUSG00000038692 (TF-TG) ENSMUSG00000027175	false
31033	TF-TG	ENSMUSG00000038692 (TF-TG) ENSMUSG00000026786	false
31032	TF-TG	ENSMUSG00000038692 (TF-TG) ENSMUSG00000026785	false
31028	TF-TG	ENSMUSG00000038692 (TF-TG) ENSMUSG00000026688	false
31022	TF-TG	ENSMUSG00000038692 (TF-TG) ENSMUSG00000026483	false
31020	TF-TG	ENSMUSG00000038692 (TF-TG) ENSMUSG00000026443	false
31017	TF-TG	ENSMUSG00000038692 (TF-TG) ENSMUSG00000026311	false
30999	TF-TG	ENSMUSG00000038692 (TF-TG) ENSMUSG00000025410	false
30997	TF-TG	ENSMUSG00000038692 (TF-TG) ENSMUSG00000025351	false
30995	TF-TG	ENSMUSG00000038692 (TF-TG) ENSMUSG00000025227	false
30991	TF-TG	ENSMUSG00000038692 (TF-TG) ENSMUSG00000025081	false
30986	TF-TG	ENSMUSG00000038692 (TF-TG) ENSMUSG00000024978	false
30985	TF-TG	ENSMUSG00000038692 (TF-TG) ENSMUSG00000024960	false
30984	TF-TG	ENSMUSG00000038692 (TF-TG) ENSMUSG00000024935	false
30968	TF-TG	ENSMUSG00000038692 (TF-TG) ENSMUSG00000024063	false
30967	TF-TG	ENSMUSG00000038692 (TF-TG) ENSMUSG00000024055	false
30962	TF-TG	ENSMUSG00000038692 (TF-TG) ENSMUSG00000023829	false
30960	TF-TG	ENSMUSG00000038692 (TF-TG) ENSMUSG00000023247	false
30959	TF-TG	ENSMUSG00000038692 (TF-TG) ENSMUSG00000023243	false
30955	TF-TG	ENSMUSG00000038692 (TF-TG) ENSMUSG00000023015	false
30949	TF-TG	ENSMUSG00000038692 (TF-TG) ENSMUSG00000022817	false
30948	TF-TG	ENSMUSG00000038692 (TF-TG) ENSMUSG00000022742	false
30943	TF-TG	ENSMUSG00000038692 (TF-TG) ENSMUSG00000022519	false
30942	TF-TG	ENSMUSG00000038692 (TF-TG) ENSMUSG00000022489	false
30941	TF-TG	ENSMUSG00000038692 (TF-TG) ENSMUSG00000022477	false
30940	TF-TG	ENSMUSG00000038692 (TF-TG) ENSMUSG00000022456	false
30939	TF-TG	ENSMUSG00000038692 (TF-TG) ENSMUSG00000022436	false
30937	TF-TG	ENSMUSG00000038692 (TF-TG) ENSMUSG00000022332	false
30932	TF-TG	ENSMUSG00000038692 (TF-TG) ENSMUSG00000022051	false
30929	TF-TG	ENSMUSG00000038692 (TF-TG) ENSMUSG00000021913	false
30924	TF-TG	ENSMUSG00000038692 (TF-TG) ENSMUSG00000021720	false
30922	TF-TG	ENSMUSG00000038692 (TF-TG) ENSMUSG00000021700	false
30918	TF-TG	ENSMUSG00000038692 (TF-TG) ENSMUSG00000021240	false
30913	TF-TG	ENSMUSG00000038692 (TF-TG) ENSMUSG00000020986	false
30908	TF-TG	ENSMUSG00000038692 (TF-TG) ENSMUSG00000020846	false
30906	TF-TG	ENSMUSG00000038692 (TF-TG) ENSMUSG00000020707	false
30903	TF-TG	ENSMUSG00000038692 (TF-TG) ENSMUSG00000020599	false
30894	TF-TG	ENSMUSG00000038692 (TF-TG) ENSMUSG00000020303	false
30879	TF-TG	ENSMUSG00000038692 (TF-TG) ENSMUSG00000019235	false
30875	TF-TG	ENSMUSG00000038692 (TF-TG) ENSMUSG00000018774	false
30869	TF-TG	ENSMUSG00000038692 (TF-TG) ENSMUSG00000017943	false
30864	TF-TG	ENSMUSG00000038692 (TF-TG) ENSMUSG00000017204	false
30861	TF-TG	ENSMUSG00000038692 (TF-TG) ENSMUSG00000016534	false
30851	TF-TG	ENSMUSG00000038692 (TF-TG) ENSMUSG00000010830	false
30848	TF-TG	ENSMUSG00000038692 (TF-TG) ENSMUSG00000008540	false
30847	TF-TG	ENSMUSG00000038692 (TF-TG) ENSMUSG00000008090	false
30841	TF-TG	ENSMUSG00000038692 (TF-TG) ENSMUSG00000006435	false
30839	TF-TG	ENSMUSG00000038692 (TF-TG) ENSMUSG00000006369	false
30838	TF-TG	ENSMUSG00000038692 (TF-TG) ENSMUSG00000005986	false
30837	TF-TG	ENSMUSG00000038692 (TF-TG) ENSMUSG00000005973	false
30836	TF-TG	ENSMUSG00000038692 (TF-TG) ENSMUSG00000005958	false
39027	miRNA-mRNA	mmu-miR-101a-3p (miRNA-mRNA) ENSMUSG00000068196	false
39022	miRNA-mRNA	mmu-miR-101a-3p (miRNA-mRNA) ENSMUSG00000053279	false
30826	TF-TG	ENSMUSG00000038692 (TF-TG) ENSMUSG00000003949	false
30824	TF-TG	ENSMUSG00000038692 (TF-TG) ENSMUSG00000003436	false
39016	miRNA-mRNA	mmu-miR-101a-3p (miRNA-mRNA) ENSMUSG00000055567	false
30823	TF-TG	ENSMUSG00000038692 (TF-TG) ENSMUSG00000003380	false
30822	TF-TG	ENSMUSG00000038692 (TF-TG) ENSMUSG00000003352	false
39013	miRNA-mRNA	mmu-miR-101a-3p (miRNA-mRNA) ENSMUSG00000058070	false
39009	miRNA-mRNA	mmu-miR-101a-3p (miRNA-mRNA) ENSMUSG00000058756	false
30816	TF-TG	ENSMUSG00000038692 (TF-TG) ENSMUSG00000001281	false
39008	miRNA-mRNA	mmu-miR-101a-3p (miRNA-mRNA) ENSMUSG00000058975	false
30815	TF-TG	ENSMUSG00000038692 (TF-TG) ENSMUSG00000001225	false
30814	TF-TG	ENSMUSG00000038692 (TF-TG) ENSMUSG00000001128	false
39003	miRNA-mRNA	mmu-miR-101a-3p (miRNA-mRNA) ENSMUSG00000048022	false
38998	miRNA-mRNA	mmu-miR-101a-3p (miRNA-mRNA) ENSMUSG00000048078	false
30803	TF-lincRNA	ENSMUSG00000035451 (TF-lincRNA) ENSMUSG00000111202	false
30801	TF-lincRNA	ENSMUSG00000035451 (TF-lincRNA) ENSMUSG00000107689	false
38993	miRNA-mRNA	mmu-miR-101a-3p (miRNA-mRNA) ENSMUSG00000049313	false
30795	TF-lincRNA	ENSMUSG00000035451 (TF-lincRNA) ENSMUSG00000085017	false
38983	miRNA-mRNA	mmu-miR-101a-3p (miRNA-mRNA) ENSMUSG00000050953	false
30789	TF-TG	ENSMUSG00000035451 (TF-TG) ENSMUSG00000098132	false
30788	TF-TG	ENSMUSG00000035451 (TF-TG) ENSMUSG00000092083	false
30784	TF-TG	ENSMUSG00000035451 (TF-TG) ENSMUSG00000079497	false
38976	miRNA-mRNA	mmu-miR-101a-3p (miRNA-mRNA) ENSMUSG00000047747	false
30780	TF-TG	ENSMUSG00000035451 (TF-TG) ENSMUSG00000079038	false
30779	TF-TG	ENSMUSG00000035451 (TF-TG) ENSMUSG00000079018	false
38971	miRNA-mRNA	mmu-miR-101a-3p (miRNA-mRNA) ENSMUSG00000044026	false
38969	miRNA-mRNA	mmu-miR-101a-3p (miRNA-mRNA) ENSMUSG00000044548	false
38968	miRNA-mRNA	mmu-miR-101a-3p (miRNA-mRNA) ENSMUSG00000044288	false
38967	miRNA-mRNA	mmu-miR-101a-3p (miRNA-mRNA) ENSMUSG00000043885	false
38966	miRNA-mRNA	mmu-miR-101a-3p (miRNA-mRNA) ENSMUSG00000046668	false
30772	TF-TG	ENSMUSG00000035451 (TF-TG) ENSMUSG00000075602	false
30770	TF-TG	ENSMUSG00000035451 (TF-TG) ENSMUSG00000075033	false
38960	miRNA-mRNA	mmu-miR-101a-3p (miRNA-mRNA) ENSMUSG00000042155	false
30766	TF-TG	ENSMUSG00000035451 (TF-TG) ENSMUSG00000074207	false
30763	TF-TG	ENSMUSG00000035451 (TF-TG) ENSMUSG00000073481	false
38954	miRNA-mRNA	mmu-miR-101a-3p (miRNA-mRNA) ENSMUSG00000041570	false
30760	TF-TG	ENSMUSG00000035451 (TF-TG) ENSMUSG00000072294	false
38952	miRNA-mRNA	mmu-miR-101a-3p (miRNA-mRNA) ENSMUSG00000042686	false
30756	TF-TG	ENSMUSG00000035451 (TF-TG) ENSMUSG00000071506	false
30752	TF-TG	ENSMUSG00000035451 (TF-TG) ENSMUSG00000070661	false
38942	miRNA-mRNA	mmu-miR-101a-3p (miRNA-mRNA) ENSMUSG00000039497	false
38939	miRNA-mRNA	mmu-miR-101a-3p (miRNA-mRNA) ENSMUSG00000040170	false
30745	TF-TG	ENSMUSG00000035451 (TF-TG) ENSMUSG00000068874	false
38937	miRNA-mRNA	mmu-miR-101a-3p (miRNA-mRNA) ENSMUSG00000038768	false
30742	TF-TG	ENSMUSG00000035451 (TF-TG) ENSMUSG00000068323	false
38934	miRNA-mRNA	mmu-miR-101a-3p (miRNA-mRNA) ENSMUSG00000040209	false
30740	TF-TG	ENSMUSG00000035451 (TF-TG) ENSMUSG00000067818	false
38932	miRNA-mRNA	mmu-miR-101a-3p (miRNA-mRNA) ENSMUSG00000040136	false
30739	TF-TG	ENSMUSG00000035451 (TF-TG) ENSMUSG00000067279	false
38930	miRNA-mRNA	mmu-miR-101a-3p (miRNA-mRNA) ENSMUSG00000039270	false
30736	TF-TG	ENSMUSG00000035451 (TF-TG) ENSMUSG00000066191	false
38928	miRNA-mRNA	mmu-miR-101a-3p (miRNA-mRNA) ENSMUSG00000037712	false
38924	miRNA-mRNA	mmu-miR-101a-3p (miRNA-mRNA) ENSMUSG00000037905	false
38920	miRNA-mRNA	mmu-miR-101a-3p (miRNA-mRNA) ENSMUSG00000036745	false
30727	TF-TG	ENSMUSG00000035451 (TF-TG) ENSMUSG00000061959	false
30722	TF-TG	ENSMUSG00000035451 (TF-TG) ENSMUSG00000060613	false
30721	TF-TG	ENSMUSG00000035451 (TF-TG) ENSMUSG00000060397	false
30720	TF-TG	ENSMUSG00000035451 (TF-TG) ENSMUSG00000060002	false
38912	miRNA-mRNA	mmu-miR-101a-3p (miRNA-mRNA) ENSMUSG00000034118	false
30719	TF-TG	ENSMUSG00000035451 (TF-TG) ENSMUSG00000059743	false
30717	TF-TG	ENSMUSG00000035451 (TF-TG) ENSMUSG00000059149	false
30715	TF-TG	ENSMUSG00000035451 (TF-TG) ENSMUSG00000059060	false
30713	TF-TG	ENSMUSG00000035451 (TF-TG) ENSMUSG00000058975	false
30712	TF-TG	ENSMUSG00000035451 (TF-TG) ENSMUSG00000058952	false
30711	TF-TG	ENSMUSG00000035451 (TF-TG) ENSMUSG00000058624	false
30710	TF-TG	ENSMUSG00000035451 (TF-TG) ENSMUSG00000058290	false
38902	miRNA-mRNA	mmu-miR-101a-3p (miRNA-mRNA) ENSMUSG00000034593	false
38901	miRNA-mRNA	mmu-miR-101a-3p (miRNA-mRNA) ENSMUSG00000034724	false
30708	TF-TG	ENSMUSG00000035451 (TF-TG) ENSMUSG00000058070	false
38900	miRNA-mRNA	mmu-miR-101a-3p (miRNA-mRNA) ENSMUSG00000034573	false
30707	TF-TG	ENSMUSG00000035451 (TF-TG) ENSMUSG00000057719	false
30704	TF-TG	ENSMUSG00000035451 (TF-TG) ENSMUSG00000056895	false
38894	miRNA-mRNA	mmu-miR-101a-3p (miRNA-mRNA) ENSMUSG00000034648	false
38892	miRNA-mRNA	mmu-miR-101a-3p (miRNA-mRNA) ENSMUSG00000031902	false
30697	TF-TG	ENSMUSG00000035451 (TF-TG) ENSMUSG00000056035	false
30696	TF-TG	ENSMUSG00000035451 (TF-TG) ENSMUSG00000055978	false
30695	TF-TG	ENSMUSG00000035451 (TF-TG) ENSMUSG00000055745	false
30694	TF-TG	ENSMUSG00000035451 (TF-TG) ENSMUSG00000055730	false
38886	miRNA-mRNA	mmu-miR-101a-3p (miRNA-mRNA) ENSMUSG00000031790	false
38884	miRNA-mRNA	mmu-miR-101a-3p (miRNA-mRNA) ENSMUSG00000032092	false
30687	TF-TG	ENSMUSG00000035451 (TF-TG) ENSMUSG00000054598	false
30683	TF-TG	ENSMUSG00000035451 (TF-TG) ENSMUSG00000053768	false
38868	miRNA-mRNA	mmu-miR-101a-3p (miRNA-mRNA) ENSMUSG00000031353	false
30670	TF-TG	ENSMUSG00000035451 (TF-TG) ENSMUSG00000051483	false
38858	miRNA-mRNA	mmu-miR-101a-3p (miRNA-mRNA) ENSMUSG00000030087	false
30665	TF-TG	ENSMUSG00000035451 (TF-TG) ENSMUSG00000051166	false
30662	TF-TG	ENSMUSG00000035451 (TF-TG) ENSMUSG00000050824	false
38852	miRNA-mRNA	mmu-miR-101a-3p (miRNA-mRNA) ENSMUSG00000029287	false
30659	TF-TG	ENSMUSG00000035451 (TF-TG) ENSMUSG00000050335	false
38851	miRNA-mRNA	mmu-miR-101a-3p (miRNA-mRNA) ENSMUSG00000028312	false
30656	TF-TG	ENSMUSG00000035451 (TF-TG) ENSMUSG00000049892	false
38848	miRNA-mRNA	mmu-miR-101a-3p (miRNA-mRNA) ENSMUSG00000028289	false
38847	miRNA-mRNA	mmu-miR-101a-3p (miRNA-mRNA) ENSMUSG00000027438	false
30650	TF-TG	ENSMUSG00000035451 (TF-TG) ENSMUSG00000049436	false
30646	TF-TG	ENSMUSG00000035451 (TF-TG) ENSMUSG00000048970	false
30644	TF-TG	ENSMUSG00000035451 (TF-TG) ENSMUSG00000048373	false
38834	miRNA-mRNA	mmu-miR-101a-3p (miRNA-mRNA) ENSMUSG00000027346	false
30641	TF-TG	ENSMUSG00000035451 (TF-TG) ENSMUSG00000047728	false
38833	miRNA-mRNA	mmu-miR-101a-3p (miRNA-mRNA) ENSMUSG00000026848	false
38832	miRNA-mRNA	mmu-miR-101a-3p (miRNA-mRNA) ENSMUSG00000026417	false
38831	miRNA-mRNA	mmu-miR-101a-3p (miRNA-mRNA) ENSMUSG00000027254	false
38829	miRNA-mRNA	mmu-miR-101a-3p (miRNA-mRNA) ENSMUSG00000026586	false
38828	miRNA-mRNA	mmu-miR-101a-3p (miRNA-mRNA) ENSMUSG00000027074	false
38827	miRNA-mRNA	mmu-miR-101a-3p (miRNA-mRNA) ENSMUSG00000026430	false
30634	TF-TG	ENSMUSG00000035451 (TF-TG) ENSMUSG00000046668	false
30633	TF-TG	ENSMUSG00000035451 (TF-TG) ENSMUSG00000046598	false
38823	miRNA-mRNA	mmu-miR-101a-3p (miRNA-mRNA) ENSMUSG00000026380	false
30630	TF-TG	ENSMUSG00000035451 (TF-TG) ENSMUSG00000046410	false
30628	TF-TG	ENSMUSG00000035451 (TF-TG) ENSMUSG00000046215	false
30627	TF-TG	ENSMUSG00000035451 (TF-TG) ENSMUSG00000046160	false
38818	miRNA-mRNA	mmu-miR-101a-3p (miRNA-mRNA) ENSMUSG00000027175	false
30625	TF-TG	ENSMUSG00000035451 (TF-TG) ENSMUSG00000045896	false
38816	miRNA-mRNA	mmu-miR-101a-3p (miRNA-mRNA) ENSMUSG00000026442	false
38813	miRNA-mRNA	mmu-miR-101a-3p (miRNA-mRNA) ENSMUSG00000024664	false
30620	TF-TG	ENSMUSG00000035451 (TF-TG) ENSMUSG00000044912	false
30617	TF-TG	ENSMUSG00000035451 (TF-TG) ENSMUSG00000044548	false
38807	miRNA-mRNA	mmu-miR-101a-3p (miRNA-mRNA) ENSMUSG00000025410	false
30614	TF-TG	ENSMUSG00000035451 (TF-TG) ENSMUSG00000044288	false
30611	TF-TG	ENSMUSG00000035451 (TF-TG) ENSMUSG00000043461	false
30605	TF-TG	ENSMUSG00000035451 (TF-TG) ENSMUSG00000042712	false
30603	TF-TG	ENSMUSG00000035451 (TF-TG) ENSMUSG00000042631	false
38795	miRNA-mRNA	mmu-miR-101a-3p (miRNA-mRNA) ENSMUSG00000024479	false
38794	miRNA-mRNA	mmu-miR-101a-3p (miRNA-mRNA) ENSMUSG00000024302	false
30601	TF-TG	ENSMUSG00000035451 (TF-TG) ENSMUSG00000042429	false
30600	TF-TG	ENSMUSG00000035451 (TF-TG) ENSMUSG00000042359	false
38792	miRNA-mRNA	mmu-miR-101a-3p (miRNA-mRNA) ENSMUSG00000024140	false
38791	miRNA-mRNA	mmu-miR-101a-3p (miRNA-mRNA) ENSMUSG00000024533	false
38790	miRNA-mRNA	mmu-miR-101a-3p (miRNA-mRNA) ENSMUSG00000024548	false
30597	TF-TG	ENSMUSG00000035451 (TF-TG) ENSMUSG00000042155	false
38789	miRNA-mRNA	mmu-miR-101a-3p (miRNA-mRNA) ENSMUSG00000024411	false
30594	TF-TG	ENSMUSG00000035451 (TF-TG) ENSMUSG00000042041	false
30586	TF-TG	ENSMUSG00000035451 (TF-TG) ENSMUSG00000041126	false
30585	TF-TG	ENSMUSG00000035451 (TF-TG) ENSMUSG00000041120	false
38777	miRNA-mRNA	mmu-miR-101a-3p (miRNA-mRNA) ENSMUSG00000022687	false
38776	miRNA-mRNA	mmu-miR-101a-3p (miRNA-mRNA) ENSMUSG00000022051	false
38773	miRNA-mRNA	mmu-miR-101a-3p (miRNA-mRNA) ENSMUSG00000022332	false
38772	miRNA-mRNA	mmu-miR-101a-3p (miRNA-mRNA) ENSMUSG00000022637	false
30579	TF-TG	ENSMUSG00000035451 (TF-TG) ENSMUSG00000040624	false
38770	miRNA-mRNA	mmu-miR-101a-3p (miRNA-mRNA) ENSMUSG00000021700	false
30571	TF-TG	ENSMUSG00000035451 (TF-TG) ENSMUSG00000040209	false
30570	TF-TG	ENSMUSG00000035451 (TF-TG) ENSMUSG00000040181	false
30567	TF-TG	ENSMUSG00000035451 (TF-TG) ENSMUSG00000039809	false
30566	TF-TG	ENSMUSG00000035451 (TF-TG) ENSMUSG00000039693	false
38758	miRNA-mRNA	mmu-miR-101a-3p (miRNA-mRNA) ENSMUSG00000019817	false
30562	TF-TG	ENSMUSG00000035451 (TF-TG) ENSMUSG00000039620	false
30561	TF-TG	ENSMUSG00000035451 (TF-TG) ENSMUSG00000039384	false
30560	TF-TG	ENSMUSG00000035451 (TF-TG) ENSMUSG00000039304	false
30559	TF-TG	ENSMUSG00000035451 (TF-TG) ENSMUSG00000039270	false
30557	TF-TG	ENSMUSG00000035451 (TF-TG) ENSMUSG00000039168	false
30556	TF-TG	ENSMUSG00000035451 (TF-TG) ENSMUSG00000039166	false
38746	miRNA-mRNA	mmu-miR-101a-3p (miRNA-mRNA) ENSMUSG00000015222	false
30553	TF-TG	ENSMUSG00000035451 (TF-TG) ENSMUSG00000039005	false
30552	TF-TG	ENSMUSG00000035451 (TF-TG) ENSMUSG00000039004	false
38743	miRNA-mRNA	mmu-miR-101a-3p (miRNA-mRNA) ENSMUSG00000014602	false
38742	miRNA-mRNA	mmu-miR-101a-3p (miRNA-mRNA) ENSMUSG00000008734	false
30546	TF-TG	ENSMUSG00000035451 (TF-TG) ENSMUSG00000038456	false
38738	miRNA-mRNA	mmu-miR-101a-3p (miRNA-mRNA) ENSMUSG00000010505	false
30543	TF-TG	ENSMUSG00000035451 (TF-TG) ENSMUSG00000037905	false
30542	TF-TG	ENSMUSG00000035451 (TF-TG) ENSMUSG00000037855	false
30539	TF-TG	ENSMUSG00000035451 (TF-TG) ENSMUSG00000037712	false
30538	TF-TG	ENSMUSG00000035451 (TF-TG) ENSMUSG00000037709	false
30537	TF-TG	ENSMUSG00000035451 (TF-TG) ENSMUSG00000037686	false
38727	miRNA-mRNA	mmu-miR-101a-3p (miRNA-mRNA) ENSMUSG00000000567	false
30531	TF-TG	ENSMUSG00000035451 (TF-TG) ENSMUSG00000037493	false
30527	TF-TG	ENSMUSG00000035451 (TF-TG) ENSMUSG00000037348	false
30521	TF-TG	ENSMUSG00000035451 (TF-TG) ENSMUSG00000036932	false
30519	TF-TG	ENSMUSG00000035451 (TF-TG) ENSMUSG00000036892	false
30516	TF-TG	ENSMUSG00000035451 (TF-TG) ENSMUSG00000036599	false
30513	TF-TG	ENSMUSG00000035451 (TF-TG) ENSMUSG00000036181	false
30511	TF-TG	ENSMUSG00000035451 (TF-TG) ENSMUSG00000035849	false
30509	TF-TG	ENSMUSG00000035451 (TF-TG) ENSMUSG00000035637	false
30507	TF-TG	ENSMUSG00000035451 (TF-TG) ENSMUSG00000035506	false
30503	TF-TG	ENSMUSG00000035451 (TF-TG) ENSMUSG00000035273	false
30501	TF-TG	ENSMUSG00000035451 (TF-TG) ENSMUSG00000035235	false
30500	TF-TG	ENSMUSG00000035451 (TF-TG) ENSMUSG00000035181	false
30499	TF-TG	ENSMUSG00000035451 (TF-TG) ENSMUSG00000035109	false
30497	TF-TG	ENSMUSG00000035451 (TF-TG) ENSMUSG00000035095	false
30494	TF-TG	ENSMUSG00000035451 (TF-TG) ENSMUSG00000034648	false
30492	TF-TG	ENSMUSG00000035451 (TF-TG) ENSMUSG00000034573	false
30491	TF-TG	ENSMUSG00000035451 (TF-TG) ENSMUSG00000034379	false
30490	TF-TG	ENSMUSG00000035451 (TF-TG) ENSMUSG00000034285	false
30488	TF-TG	ENSMUSG00000035451 (TF-TG) ENSMUSG00000034118	false
30487	TF-TG	ENSMUSG00000035451 (TF-TG) ENSMUSG00000034006	false
30485	TF-TG	ENSMUSG00000035451 (TF-TG) ENSMUSG00000033900	false
30484	TF-TG	ENSMUSG00000035451 (TF-TG) ENSMUSG00000033684	false
30481	TF-TG	ENSMUSG00000035451 (TF-TG) ENSMUSG00000033308	false
30471	TF-TG	ENSMUSG00000035451 (TF-TG) ENSMUSG00000032702	false
30470	TF-TG	ENSMUSG00000035451 (TF-TG) ENSMUSG00000032531	false
30468	TF-TG	ENSMUSG00000035451 (TF-TG) ENSMUSG00000032373	false
30467	TF-TG	ENSMUSG00000035451 (TF-TG) ENSMUSG00000032358	false
30466	TF-TG	ENSMUSG00000035451 (TF-TG) ENSMUSG00000032356	false
30464	TF-TG	ENSMUSG00000035451 (TF-TG) ENSMUSG00000032285	false
30463	TF-TG	ENSMUSG00000035451 (TF-TG) ENSMUSG00000032251	false
30460	TF-TG	ENSMUSG00000035451 (TF-TG) ENSMUSG00000032092	false
30449	TF-TG	ENSMUSG00000035451 (TF-TG) ENSMUSG00000031790	false
30448	TF-TG	ENSMUSG00000035451 (TF-TG) ENSMUSG00000031785	false
30440	TF-TG	ENSMUSG00000035451 (TF-TG) ENSMUSG00000031444	false
30432	TF-TG	ENSMUSG00000035451 (TF-TG) ENSMUSG00000030659	false
30430	TF-TG	ENSMUSG00000035451 (TF-TG) ENSMUSG00000030510	false
30427	TF-TG	ENSMUSG00000035451 (TF-TG) ENSMUSG00000029875	false
30422	TF-TG	ENSMUSG00000035451 (TF-TG) ENSMUSG00000029762	false
30418	TF-TG	ENSMUSG00000035451 (TF-TG) ENSMUSG00000029380	false
30414	TF-TG	ENSMUSG00000035451 (TF-TG) ENSMUSG00000029287	false
30404	TF-TG	ENSMUSG00000035451 (TF-TG) ENSMUSG00000028749	false
30400	TF-TG	ENSMUSG00000035451 (TF-TG) ENSMUSG00000028518	false
30396	TF-TG	ENSMUSG00000035451 (TF-TG) ENSMUSG00000028289	false
30388	TF-TG	ENSMUSG00000035451 (TF-TG) ENSMUSG00000028024	false
30385	TF-TG	ENSMUSG00000035451 (TF-TG) ENSMUSG00000027805	false
30381	TF-TG	ENSMUSG00000035451 (TF-TG) ENSMUSG00000027698	false
30378	TF-TG	ENSMUSG00000035451 (TF-TG) ENSMUSG00000027661	false
30377	TF-TG	ENSMUSG00000035451 (TF-TG) ENSMUSG00000027611	false
30371	TF-TG	ENSMUSG00000035451 (TF-TG) ENSMUSG00000026848	false
30364	TF-TG	ENSMUSG00000035451 (TF-TG) ENSMUSG00000026430	false
30363	TF-TG	ENSMUSG00000035451 (TF-TG) ENSMUSG00000026417	false
30360	TF-TG	ENSMUSG00000035451 (TF-TG) ENSMUSG00000026380	false
30359	TF-TG	ENSMUSG00000035451 (TF-TG) ENSMUSG00000026321	false
30358	TF-TG	ENSMUSG00000035451 (TF-TG) ENSMUSG00000026311	false
30349	TF-TG	ENSMUSG00000035451 (TF-TG) ENSMUSG00000025726	false
30348	TF-TG	ENSMUSG00000035451 (TF-TG) ENSMUSG00000025652	false
30344	TF-TG	ENSMUSG00000035451 (TF-TG) ENSMUSG00000025479	false
30342	TF-TG	ENSMUSG00000035451 (TF-TG) ENSMUSG00000025428	false
30341	TF-TG	ENSMUSG00000035451 (TF-TG) ENSMUSG00000025410	false
30340	TF-TG	ENSMUSG00000035451 (TF-TG) ENSMUSG00000025351	false
30336	TF-TG	ENSMUSG00000035451 (TF-TG) ENSMUSG00000025150	false
30332	TF-TG	ENSMUSG00000035451 (TF-TG) ENSMUSG00000024978	false
30331	TF-TG	ENSMUSG00000035451 (TF-TG) ENSMUSG00000024935	false
30326	TF-TG	ENSMUSG00000035451 (TF-TG) ENSMUSG00000024810	false
30322	TF-TG	ENSMUSG00000035451 (TF-TG) ENSMUSG00000024548	false
30319	TF-TG	ENSMUSG00000035451 (TF-TG) ENSMUSG00000024424	false
30316	TF-TG	ENSMUSG00000035451 (TF-TG) ENSMUSG00000024292	false
30313	TF-TG	ENSMUSG00000035451 (TF-TG) ENSMUSG00000024029	false
30312	TF-TG	ENSMUSG00000035451 (TF-TG) ENSMUSG00000023963	false
30308	TF-TG	ENSMUSG00000035451 (TF-TG) ENSMUSG00000023832	false
30307	TF-TG	ENSMUSG00000035451 (TF-TG) ENSMUSG00000023829	false
30299	TF-TG	ENSMUSG00000035451 (TF-TG) ENSMUSG00000022817	false
30297	TF-TG	ENSMUSG00000035451 (TF-TG) ENSMUSG00000022742	false
30295	TF-TG	ENSMUSG00000035451 (TF-TG) ENSMUSG00000022637	false
30287	TF-TG	ENSMUSG00000035451 (TF-TG) ENSMUSG00000022519	false
30285	TF-TG	ENSMUSG00000035451 (TF-TG) ENSMUSG00000022435	false
30280	TF-TG	ENSMUSG00000035451 (TF-TG) ENSMUSG00000022051	false
30277	TF-TG	ENSMUSG00000035451 (TF-TG) ENSMUSG00000021913	false
30274	TF-TG	ENSMUSG00000035451 (TF-TG) ENSMUSG00000021779	false
30272	TF-TG	ENSMUSG00000035451 (TF-TG) ENSMUSG00000021720	false
30269	TF-TG	ENSMUSG00000035451 (TF-TG) ENSMUSG00000021367	false
30262	TF-TG	ENSMUSG00000035451 (TF-TG) ENSMUSG00000020668	false
30260	TF-TG	ENSMUSG00000035451 (TF-TG) ENSMUSG00000020572	false
30255	TF-TG	ENSMUSG00000035451 (TF-TG) ENSMUSG00000020303	false
30251	TF-TG	ENSMUSG00000035451 (TF-TG) ENSMUSG00000020105	false
30248	TF-TG	ENSMUSG00000035451 (TF-TG) ENSMUSG00000020010	false
30242	TF-TG	ENSMUSG00000035451 (TF-TG) ENSMUSG00000019817	false
30241	TF-TG	ENSMUSG00000035451 (TF-TG) ENSMUSG00000019647	false
30229	TF-TG	ENSMUSG00000035451 (TF-TG) ENSMUSG00000016534	false
30228	TF-TG	ENSMUSG00000035451 (TF-TG) ENSMUSG00000015962	false
30224	TF-TG	ENSMUSG00000035451 (TF-TG) ENSMUSG00000015709	false
30221	TF-TG	ENSMUSG00000035451 (TF-TG) ENSMUSG00000015189	false
30219	TF-TG	ENSMUSG00000035451 (TF-TG) ENSMUSG00000014602	false
30215	TF-TG	ENSMUSG00000035451 (TF-TG) ENSMUSG00000013523	false
30210	TF-TG	ENSMUSG00000035451 (TF-TG) ENSMUSG00000010505	false
30208	TF-TG	ENSMUSG00000035451 (TF-TG) ENSMUSG00000009246	false
30202	TF-TG	ENSMUSG00000035451 (TF-TG) ENSMUSG00000005958	false
30198	TF-TG	ENSMUSG00000035451 (TF-TG) ENSMUSG00000005360	false
30197	TF-TG	ENSMUSG00000035451 (TF-TG) ENSMUSG00000005268	false
30194	TF-TG	ENSMUSG00000035451 (TF-TG) ENSMUSG00000004151	false
30192	TF-TG	ENSMUSG00000035451 (TF-TG) ENSMUSG00000003949	false
30189	TF-TG	ENSMUSG00000035451 (TF-TG) ENSMUSG00000003380	false
30184	TF-TG	ENSMUSG00000035451 (TF-TG) ENSMUSG00000001901	false
30183	TF-TG	ENSMUSG00000035451 (TF-TG) ENSMUSG00000001095	false
30182	TF-TG	ENSMUSG00000035451 (TF-TG) ENSMUSG00000000567	false
30181	TF-TG	ENSMUSG00000035451 (TF-TG) ENSMUSG00000000394	false
30180	TF-TG	ENSMUSG00000035451 (TF-TG) ENSMUSG00000000253	false
5488	TF-TG	ENSMUSG00000021779 (TF-TG) ENSMUSG00000061397	false
5486	TF-TG	ENSMUSG00000021779 (TF-TG) ENSMUSG00000044026	false
5480	TF-TG	ENSMUSG00000021779 (TF-TG) ENSMUSG00000029059	false
5475	TF-TG	ENSMUSG00000021779 (TF-TG) ENSMUSG00000003352	false
38163	miRNA-mRNA	mmu-miR-20b-5p (miRNA-mRNA) ENSMUSG00000070733	false
38160	miRNA-mRNA	mmu-miR-20b-5p (miRNA-mRNA) ENSMUSG00000055485	false
38157	miRNA-mRNA	mmu-miR-20b-5p (miRNA-mRNA) ENSMUSG00000055980	false
38151	miRNA-mRNA	mmu-miR-20b-5p (miRNA-mRNA) ENSMUSG00000058756	false
38137	miRNA-mRNA	mmu-miR-20b-5p (miRNA-mRNA) ENSMUSG00000049288	false
38130	miRNA-mRNA	mmu-miR-20b-5p (miRNA-mRNA) ENSMUSG00000049313	false
38126	miRNA-mRNA	mmu-miR-20b-5p (miRNA-mRNA) ENSMUSG00000042712	false
38123	miRNA-mRNA	mmu-miR-20b-5p (miRNA-mRNA) ENSMUSG00000044288	false
38122	miRNA-mRNA	mmu-miR-20b-5p (miRNA-mRNA) ENSMUSG00000043885	false
38120	miRNA-mRNA	mmu-miR-20b-5p (miRNA-mRNA) ENSMUSG00000044033	false
38117	miRNA-mRNA	mmu-miR-20b-5p (miRNA-mRNA) ENSMUSG00000042734	false
38113	miRNA-mRNA	mmu-miR-20b-5p (miRNA-mRNA) ENSMUSG00000041945	false
38112	miRNA-mRNA	mmu-miR-20b-5p (miRNA-mRNA) ENSMUSG00000047747	false
38101	miRNA-mRNA	mmu-miR-20b-5p (miRNA-mRNA) ENSMUSG00000041570	false
38098	miRNA-mRNA	mmu-miR-20b-5p (miRNA-mRNA) ENSMUSG00000041120	false
38096	miRNA-mRNA	mmu-miR-20b-5p (miRNA-mRNA) ENSMUSG00000039157	false
38095	miRNA-mRNA	mmu-miR-20b-5p (miRNA-mRNA) ENSMUSG00000041729	false
38093	miRNA-mRNA	mmu-miR-20b-5p (miRNA-mRNA) ENSMUSG00000038181	false
38083	miRNA-mRNA	mmu-miR-20b-5p (miRNA-mRNA) ENSMUSG00000036932	false
38078	miRNA-mRNA	mmu-miR-20b-5p (miRNA-mRNA) ENSMUSG00000034724	false
38070	miRNA-mRNA	mmu-miR-20b-5p (miRNA-mRNA) ENSMUSG00000032353	false
38068	miRNA-mRNA	mmu-miR-20b-5p (miRNA-mRNA) ENSMUSG00000033684	false
38067	miRNA-mRNA	mmu-miR-20b-5p (miRNA-mRNA) ENSMUSG00000033581	false
38061	miRNA-mRNA	mmu-miR-20b-5p (miRNA-mRNA) ENSMUSG00000032285	false
38056	miRNA-mRNA	mmu-miR-20b-5p (miRNA-mRNA) ENSMUSG00000031902	false
38045	miRNA-mRNA	mmu-miR-20b-5p (miRNA-mRNA) ENSMUSG00000031327	false
38041	miRNA-mRNA	mmu-miR-20b-5p (miRNA-mRNA) ENSMUSG00000031353	false
38030	miRNA-mRNA	mmu-miR-20b-5p (miRNA-mRNA) ENSMUSG00000028312	false
38024	miRNA-mRNA	mmu-miR-20b-5p (miRNA-mRNA) ENSMUSG00000028223	false
17538	TF-lincRNA	ENSMUSG00000052684 (TF-lincRNA) ENSMUSG00000097632	false
17535	TF-lincRNA	ENSMUSG00000052684 (TF-lincRNA) ENSMUSG00000102123	false
17530	TF-lincRNA	ENSMUSG00000052684 (TF-lincRNA) ENSMUSG00000110697	false
38009	miRNA-mRNA	mmu-miR-20b-5p (miRNA-mRNA) ENSMUSG00000026430	false
38008	miRNA-mRNA	mmu-miR-20b-5p (miRNA-mRNA) ENSMUSG00000026848	false
17528	TF-lincRNA	ENSMUSG00000052684 (TF-lincRNA) ENSMUSG00000108961	false
38005	miRNA-mRNA	mmu-miR-20b-5p (miRNA-mRNA) ENSMUSG00000026586	false
17525	TF-lincRNA	ENSMUSG00000052684 (TF-lincRNA) ENSMUSG00000107689	false
17524	TF-lincRNA	ENSMUSG00000052684 (TF-lincRNA) ENSMUSG00000097797	false
17523	TF-lincRNA	ENSMUSG00000052684 (TF-lincRNA) ENSMUSG00000108356	false
37998	miRNA-mRNA	mmu-miR-20b-5p (miRNA-mRNA) ENSMUSG00000024664	false
17518	TF-lincRNA	ENSMUSG00000052684 (TF-lincRNA) ENSMUSG00000085126	false
37995	miRNA-mRNA	mmu-miR-20b-5p (miRNA-mRNA) ENSMUSG00000024063	false
37994	miRNA-mRNA	mmu-miR-20b-5p (miRNA-mRNA) ENSMUSG00000023015	false
37993	miRNA-mRNA	mmu-miR-20b-5p (miRNA-mRNA) ENSMUSG00000024548	false
37990	miRNA-mRNA	mmu-miR-20b-5p (miRNA-mRNA) ENSMUSG00000022637	false
37984	miRNA-mRNA	mmu-miR-20b-5p (miRNA-mRNA) ENSMUSG00000022863	false
17501	TF-TG	ENSMUSG00000052684 (TF-TG) ENSMUSG00000110206	false
37980	miRNA-mRNA	mmu-miR-20b-5p (miRNA-mRNA) ENSMUSG00000022033	false
37975	miRNA-mRNA	mmu-miR-20b-5p (miRNA-mRNA) ENSMUSG00000022051	false
17495	TF-TG	ENSMUSG00000052684 (TF-TG) ENSMUSG00000096847	false
37974	miRNA-mRNA	mmu-miR-20b-5p (miRNA-mRNA) ENSMUSG00000020986	false
37964	miRNA-mRNA	mmu-miR-20b-5p (miRNA-mRNA) ENSMUSG00000020105	false
17484	TF-TG	ENSMUSG00000052684 (TF-TG) ENSMUSG00000091243	false
17481	TF-TG	ENSMUSG00000052684 (TF-TG) ENSMUSG00000090291	false
37958	miRNA-mRNA	mmu-miR-20b-5p (miRNA-mRNA) ENSMUSG00000020674	false
37957	miRNA-mRNA	mmu-miR-20b-5p (miRNA-mRNA) ENSMUSG00000009614	false
37954	miRNA-mRNA	mmu-miR-20b-5p (miRNA-mRNA) ENSMUSG00000016534	false
37952	miRNA-mRNA	mmu-miR-20b-5p (miRNA-mRNA) ENSMUSG00000015568	false
17468	TF-TG	ENSMUSG00000052684 (TF-TG) ENSMUSG00000079038	false
17466	TF-TG	ENSMUSG00000052684 (TF-TG) ENSMUSG00000079018	false
37945	miRNA-mRNA	mmu-miR-20b-5p (miRNA-mRNA) ENSMUSG00000004558	false
17461	TF-TG	ENSMUSG00000052684 (TF-TG) ENSMUSG00000078695	false
37940	miRNA-mRNA	mmu-miR-20b-5p (miRNA-mRNA) ENSMUSG00000000567	false
37939	miRNA-mRNA	mmu-miR-20b-5p (miRNA-mRNA) ENSMUSG00000005360	false
17457	TF-TG	ENSMUSG00000052684 (TF-TG) ENSMUSG00000078349	false
17456	TF-TG	ENSMUSG00000052684 (TF-TG) ENSMUSG00000078202	false
17453	TF-TG	ENSMUSG00000052684 (TF-TG) ENSMUSG00000075602	false
17451	TF-TG	ENSMUSG00000052684 (TF-TG) ENSMUSG00000075122	false
17450	TF-TG	ENSMUSG00000052684 (TF-TG) ENSMUSG00000075033	false
17441	TF-TG	ENSMUSG00000052684 (TF-TG) ENSMUSG00000074628	false
17433	TF-TG	ENSMUSG00000052684 (TF-TG) ENSMUSG00000074207	false
17427	TF-TG	ENSMUSG00000052684 (TF-TG) ENSMUSG00000073481	false
17417	TF-TG	ENSMUSG00000052684 (TF-TG) ENSMUSG00000072294	false
17416	TF-TG	ENSMUSG00000052684 (TF-TG) ENSMUSG00000072235	false
17415	TF-TG	ENSMUSG00000052684 (TF-TG) ENSMUSG00000072214	false
17409	TF-TG	ENSMUSG00000052684 (TF-TG) ENSMUSG00000071506	false
17407	TF-TG	ENSMUSG00000052684 (TF-TG) ENSMUSG00000070867	false
17406	TF-TG	ENSMUSG00000052684 (TF-TG) ENSMUSG00000070803	false
17403	TF-TG	ENSMUSG00000052684 (TF-TG) ENSMUSG00000070733	false
17401	TF-TG	ENSMUSG00000052684 (TF-TG) ENSMUSG00000070661	false
9199	TF-lincRNA	ENSMUSG00000022809 (TF-lincRNA) ENSMUSG00000097632	false
9198	TF-lincRNA	ENSMUSG00000022809 (TF-lincRNA) ENSMUSG00000111202	false
9194	TF-lincRNA	ENSMUSG00000022809 (TF-lincRNA) ENSMUSG00000107689	false
17385	TF-TG	ENSMUSG00000052684 (TF-TG) ENSMUSG00000068874	false
9193	TF-lincRNA	ENSMUSG00000022809 (TF-lincRNA) ENSMUSG00000108356	false
17383	TF-TG	ENSMUSG00000052684 (TF-TG) ENSMUSG00000068735	false
17381	TF-TG	ENSMUSG00000052684 (TF-TG) ENSMUSG00000068617	false
17379	TF-TG	ENSMUSG00000052684 (TF-TG) ENSMUSG00000068323	false
17376	TF-TG	ENSMUSG00000052684 (TF-TG) ENSMUSG00000068196	false
17375	TF-TG	ENSMUSG00000052684 (TF-TG) ENSMUSG00000068101	false
17372	TF-TG	ENSMUSG00000052684 (TF-TG) ENSMUSG00000067818	false
17370	TF-TG	ENSMUSG00000052684 (TF-TG) ENSMUSG00000067279	false
9178	TF-TG	ENSMUSG00000022809 (TF-TG) ENSMUSG00000074207	false
17365	TF-TG	ENSMUSG00000052684 (TF-TG) ENSMUSG00000066441	false
9172	TF-TG	ENSMUSG00000022809 (TF-TG) ENSMUSG00000070803	false
17363	TF-TG	ENSMUSG00000052684 (TF-TG) ENSMUSG00000066191	false
9167	TF-TG	ENSMUSG00000022809 (TF-TG) ENSMUSG00000068101	false
9166	TF-TG	ENSMUSG00000022809 (TF-TG) ENSMUSG00000067279	false
17357	TF-TG	ENSMUSG00000052684 (TF-TG) ENSMUSG00000064272	false
9165	TF-TG	ENSMUSG00000022809 (TF-TG) ENSMUSG00000066441	false
17354	TF-TG	ENSMUSG00000052684 (TF-TG) ENSMUSG00000064247	false
17353	TF-TG	ENSMUSG00000052684 (TF-TG) ENSMUSG00000064246	false
9161	TF-TG	ENSMUSG00000022809 (TF-TG) ENSMUSG00000063704	false
9156	TF-TG	ENSMUSG00000022809 (TF-TG) ENSMUSG00000060002	false
17346	TF-TG	ENSMUSG00000052684 (TF-TG) ENSMUSG00000064080	false
9153	TF-TG	ENSMUSG00000022809 (TF-TG) ENSMUSG00000058624	false
9151	TF-TG	ENSMUSG00000022809 (TF-TG) ENSMUSG00000056895	false
17342	TF-TG	ENSMUSG00000052684 (TF-TG) ENSMUSG00000063704	false
9150	TF-TG	ENSMUSG00000022809 (TF-TG) ENSMUSG00000056832	false
9149	TF-TG	ENSMUSG00000022809 (TF-TG) ENSMUSG00000056671	false
17339	TF-TG	ENSMUSG00000052684 (TF-TG) ENSMUSG00000063524	false
9146	TF-TG	ENSMUSG00000022809 (TF-TG) ENSMUSG00000056035	false
9145	TF-TG	ENSMUSG00000022809 (TF-TG) ENSMUSG00000055978	false
9141	TF-TG	ENSMUSG00000022809 (TF-TG) ENSMUSG00000054582	false
17332	TF-TG	ENSMUSG00000052684 (TF-TG) ENSMUSG00000062908	false
17329	TF-TG	ENSMUSG00000052684 (TF-TG) ENSMUSG00000062683	false
9137	TF-TG	ENSMUSG00000022809 (TF-TG) ENSMUSG00000052609	false
9136	TF-TG	ENSMUSG00000022809 (TF-TG) ENSMUSG00000052396	false
25516	TF-TG	ENSMUSG00000035235 (TF-TG) ENSMUSG00000032083	false
25515	TF-TG	ENSMUSG00000034227 (TF-TG) ENSMUSG00000035451	false
17321	TF-TG	ENSMUSG00000052684 (TF-TG) ENSMUSG00000061959	false
17320	TF-TG	ENSMUSG00000052684 (TF-TG) ENSMUSG00000061838	false
9121	TF-TG	ENSMUSG00000022809 (TF-TG) ENSMUSG00000048965	false
17312	TF-TG	ENSMUSG00000052684 (TF-TG) ENSMUSG00000061397	false
9119	TF-TG	ENSMUSG00000022809 (TF-TG) ENSMUSG00000048078	false
9117	TF-TG	ENSMUSG00000022809 (TF-TG) ENSMUSG00000047810	false
17308	TF-TG	ENSMUSG00000052684 (TF-TG) ENSMUSG00000060733	false
17307	TF-TG	ENSMUSG00000052684 (TF-TG) ENSMUSG00000060613	false
9114	TF-TG	ENSMUSG00000022809 (TF-TG) ENSMUSG00000047747	false
17303	TF-TG	ENSMUSG00000052684 (TF-TG) ENSMUSG00000060002	false
17302	TF-TG	ENSMUSG00000052684 (TF-TG) ENSMUSG00000059991	false
17300	TF-TG	ENSMUSG00000052684 (TF-TG) ENSMUSG00000059895	false
9108	TF-TG	ENSMUSG00000022809 (TF-TG) ENSMUSG00000045838	false
17298	TF-TG	ENSMUSG00000052684 (TF-TG) ENSMUSG00000059743	false
9106	TF-TG	ENSMUSG00000022809 (TF-TG) ENSMUSG00000045294	false
17294	TF-TG	ENSMUSG00000052684 (TF-TG) ENSMUSG00000059401	false
17293	TF-TG	ENSMUSG00000052684 (TF-TG) ENSMUSG00000059149	false
17291	TF-TG	ENSMUSG00000052684 (TF-TG) ENSMUSG00000059060	false
9099	TF-TG	ENSMUSG00000022809 (TF-TG) ENSMUSG00000042751	false
9098	TF-TG	ENSMUSG00000022809 (TF-TG) ENSMUSG00000042429	false
17289	TF-TG	ENSMUSG00000052684 (TF-TG) ENSMUSG00000058975	false
17288	TF-TG	ENSMUSG00000052684 (TF-TG) ENSMUSG00000058952	false
9095	TF-TG	ENSMUSG00000022809 (TF-TG) ENSMUSG00000042041	false
17285	TF-TG	ENSMUSG00000052684 (TF-TG) ENSMUSG00000058624	false
17284	TF-TG	ENSMUSG00000052684 (TF-TG) ENSMUSG00000058586	false
9092	TF-TG	ENSMUSG00000022809 (TF-TG) ENSMUSG00000041120	false
17283	TF-TG	ENSMUSG00000052684 (TF-TG) ENSMUSG00000058454	false
17279	TF-TG	ENSMUSG00000052684 (TF-TG) ENSMUSG00000058070	false
17277	TF-TG	ENSMUSG00000052684 (TF-TG) ENSMUSG00000057719	false
9084	TF-TG	ENSMUSG00000022809 (TF-TG) ENSMUSG00000039497	false
9083	TF-TG	ENSMUSG00000022809 (TF-TG) ENSMUSG00000039384	false
9082	TF-TG	ENSMUSG00000022809 (TF-TG) ENSMUSG00000039270	false
9079	TF-TG	ENSMUSG00000022809 (TF-TG) ENSMUSG00000039005	false
9078	TF-TG	ENSMUSG00000022809 (TF-TG) ENSMUSG00000038768	false
17269	TF-TG	ENSMUSG00000052684 (TF-TG) ENSMUSG00000056895	false
9076	TF-TG	ENSMUSG00000022809 (TF-TG) ENSMUSG00000038456	false
9074	TF-TG	ENSMUSG00000022809 (TF-TG) ENSMUSG00000037709	false
17264	TF-TG	ENSMUSG00000052684 (TF-TG) ENSMUSG00000056671	false
9069	TF-TG	ENSMUSG00000022809 (TF-TG) ENSMUSG00000037005	false
9066	TF-TG	ENSMUSG00000022809 (TF-TG) ENSMUSG00000036667	false
17257	TF-TG	ENSMUSG00000052684 (TF-TG) ENSMUSG00000056185	false
9062	TF-TG	ENSMUSG00000022809 (TF-TG) ENSMUSG00000035506	false
17253	TF-TG	ENSMUSG00000052684 (TF-TG) ENSMUSG00000055980	false
9061	TF-TG	ENSMUSG00000022809 (TF-TG) ENSMUSG00000035473	false
17252	TF-TG	ENSMUSG00000052684 (TF-TG) ENSMUSG00000055978	false
9059	TF-TG	ENSMUSG00000022809 (TF-TG) ENSMUSG00000035299	false
9058	TF-TG	ENSMUSG00000022809 (TF-TG) ENSMUSG00000035235	false
9057	TF-TG	ENSMUSG00000022809 (TF-TG) ENSMUSG00000035181	false
17247	TF-TG	ENSMUSG00000052684 (TF-TG) ENSMUSG00000055730	false
17243	TF-TG	ENSMUSG00000052684 (TF-TG) ENSMUSG00000055485	false
9051	TF-TG	ENSMUSG00000022809 (TF-TG) ENSMUSG00000034593	false
9050	TF-TG	ENSMUSG00000022809 (TF-TG) ENSMUSG00000034586	false
17241	TF-TG	ENSMUSG00000052684 (TF-TG) ENSMUSG00000055150	false
9044	TF-TG	ENSMUSG00000022809 (TF-TG) ENSMUSG00000033061	false
17233	TF-TG	ENSMUSG00000052684 (TF-TG) ENSMUSG00000054793	false
9041	TF-TG	ENSMUSG00000022809 (TF-TG) ENSMUSG00000032358	false
17232	TF-TG	ENSMUSG00000052684 (TF-TG) ENSMUSG00000054764	false
9040	TF-TG	ENSMUSG00000022809 (TF-TG) ENSMUSG00000032356	false
17228	TF-TG	ENSMUSG00000052684 (TF-TG) ENSMUSG00000054598	false
17227	TF-TG	ENSMUSG00000052684 (TF-TG) ENSMUSG00000054582	false
17225	TF-TG	ENSMUSG00000052684 (TF-TG) ENSMUSG00000054469	false
17217	TF-TG	ENSMUSG00000052684 (TF-TG) ENSMUSG00000053783	false
9020	TF-TG	ENSMUSG00000022809 (TF-TG) ENSMUSG00000030107	false
9019	TF-TG	ENSMUSG00000022809 (TF-TG) ENSMUSG00000029811	false
9017	TF-TG	ENSMUSG00000022809 (TF-TG) ENSMUSG00000029762	false
17207	TF-TG	ENSMUSG00000052684 (TF-TG) ENSMUSG00000053317	false
9015	TF-TG	ENSMUSG00000022809 (TF-TG) ENSMUSG00000029380	false
17206	TF-TG	ENSMUSG00000052684 (TF-TG) ENSMUSG00000053279	false
9014	TF-TG	ENSMUSG00000022809 (TF-TG) ENSMUSG00000029287	false
9012	TF-TG	ENSMUSG00000022809 (TF-TG) ENSMUSG00000029168	false
9009	TF-TG	ENSMUSG00000022809 (TF-TG) ENSMUSG00000029153	false
17200	TF-TG	ENSMUSG00000052684 (TF-TG) ENSMUSG00000052921	false
17196	TF-TG	ENSMUSG00000052684 (TF-TG) ENSMUSG00000052609	false
17193	TF-TG	ENSMUSG00000052684 (TF-TG) ENSMUSG00000052396	false
17189	TF-TG	ENSMUSG00000052684 (TF-TG) ENSMUSG00000052135	false
17186	TF-TG	ENSMUSG00000052684 (TF-TG) ENSMUSG00000052087	false
8993	TF-TG	ENSMUSG00000022809 (TF-TG) ENSMUSG00000027187	false
17184	TF-TG	ENSMUSG00000052684 (TF-TG) ENSMUSG00000051980	false
17183	TF-TG	ENSMUSG00000052684 (TF-TG) ENSMUSG00000051977	false
17181	TF-TG	ENSMUSG00000052684 (TF-TG) ENSMUSG00000051726	false
8988	TF-TG	ENSMUSG00000022809 (TF-TG) ENSMUSG00000026586	false
17179	TF-TG	ENSMUSG00000052684 (TF-TG) ENSMUSG00000051483	false
8982	TF-TG	ENSMUSG00000022809 (TF-TG) ENSMUSG00000025726	false
8980	TF-TG	ENSMUSG00000022809 (TF-TG) ENSMUSG00000025227	false
17170	TF-TG	ENSMUSG00000052684 (TF-TG) ENSMUSG00000051166	false
8978	TF-TG	ENSMUSG00000022809 (TF-TG) ENSMUSG00000025150	false
17167	TF-TG	ENSMUSG00000052684 (TF-TG) ENSMUSG00000050953	false
17166	TF-TG	ENSMUSG00000052684 (TF-TG) ENSMUSG00000050824	false
8973	TF-TG	ENSMUSG00000022809 (TF-TG) ENSMUSG00000024978	false
17162	TF-TG	ENSMUSG00000052684 (TF-TG) ENSMUSG00000050751	false
8969	TF-TG	ENSMUSG00000022809 (TF-TG) ENSMUSG00000024810	false
8965	TF-TG	ENSMUSG00000022809 (TF-TG) ENSMUSG00000024738	false
8964	TF-TG	ENSMUSG00000022809 (TF-TG) ENSMUSG00000024727	false
8963	TF-TG	ENSMUSG00000022809 (TF-TG) ENSMUSG00000024659	false
17152	TF-TG	ENSMUSG00000052684 (TF-TG) ENSMUSG00000050335	false
8953	TF-TG	ENSMUSG00000022809 (TF-TG) ENSMUSG00000022863	false
8951	TF-TG	ENSMUSG00000022809 (TF-TG) ENSMUSG00000022637	false
8948	TF-TG	ENSMUSG00000022809 (TF-TG) ENSMUSG00000022489	false
17137	TF-TG	ENSMUSG00000052684 (TF-TG) ENSMUSG00000049436	false
17136	TF-TG	ENSMUSG00000052684 (TF-TG) ENSMUSG00000049313	false
17130	TF-TG	ENSMUSG00000052684 (TF-TG) ENSMUSG00000048970	false
8938	TF-TG	ENSMUSG00000022809 (TF-TG) ENSMUSG00000021700	false
17129	TF-TG	ENSMUSG00000052684 (TF-TG) ENSMUSG00000048965	false
8935	TF-TG	ENSMUSG00000022809 (TF-TG) ENSMUSG00000021240	false
8934	TF-TG	ENSMUSG00000022809 (TF-TG) ENSMUSG00000021223	false
8933	TF-TG	ENSMUSG00000022809 (TF-TG) ENSMUSG00000021123	false
8929	TF-TG	ENSMUSG00000022809 (TF-TG) ENSMUSG00000020651	false
8928	TF-TG	ENSMUSG00000022809 (TF-TG) ENSMUSG00000020572	false
17119	TF-TG	ENSMUSG00000052684 (TF-TG) ENSMUSG00000048373	false
8927	TF-TG	ENSMUSG00000022809 (TF-TG) ENSMUSG00000020467	false
17115	TF-TG	ENSMUSG00000052684 (TF-TG) ENSMUSG00000048078	false
17113	TF-TG	ENSMUSG00000052684 (TF-TG) ENSMUSG00000048022	false
8919	TF-TG	ENSMUSG00000022809 (TF-TG) ENSMUSG00000018507	false
17107	TF-TG	ENSMUSG00000052684 (TF-TG) ENSMUSG00000047875	false
17105	TF-TG	ENSMUSG00000052684 (TF-TG) ENSMUSG00000047842	false
17104	TF-TG	ENSMUSG00000052684 (TF-TG) ENSMUSG00000047810	false
8911	TF-TG	ENSMUSG00000022809 (TF-TG) ENSMUSG00000015568	false
17101	TF-TG	ENSMUSG00000052684 (TF-TG) ENSMUSG00000047747	false
17100	TF-TG	ENSMUSG00000052684 (TF-TG) ENSMUSG00000047730	false
8904	TF-TG	ENSMUSG00000022809 (TF-TG) ENSMUSG00000008540	false
8903	TF-TG	ENSMUSG00000022809 (TF-TG) ENSMUSG00000006435	false
8902	TF-TG	ENSMUSG00000022809 (TF-TG) ENSMUSG00000005973	false
17093	TF-TG	ENSMUSG00000052684 (TF-TG) ENSMUSG00000047205	false
8899	TF-TG	ENSMUSG00000022809 (TF-TG) ENSMUSG00000005360	false
8898	TF-TG	ENSMUSG00000022809 (TF-TG) ENSMUSG00000005355	false
8896	TF-TG	ENSMUSG00000022809 (TF-TG) ENSMUSG00000005267	false
8894	TF-TG	ENSMUSG00000022809 (TF-TG) ENSMUSG00000004151	false
17084	TF-TG	ENSMUSG00000052684 (TF-TG) ENSMUSG00000046697	false
17082	TF-TG	ENSMUSG00000052684 (TF-TG) ENSMUSG00000046668	false
8890	TF-TG	ENSMUSG00000022809 (TF-TG) ENSMUSG00000001864	false
17080	TF-TG	ENSMUSG00000052684 (TF-TG) ENSMUSG00000046598	false
17079	TF-TG	ENSMUSG00000052684 (TF-TG) ENSMUSG00000046591	false
8887	TF-TG	ENSMUSG00000022809 (TF-TG) ENSMUSG00000001281	false
8886	TF-TG	ENSMUSG00000022809 (TF-TG) ENSMUSG00000001023	false
8883	TF-TG	ENSMUSG00000022809 (TF-TG) ENSMUSG00000000253	false
17074	TF-TG	ENSMUSG00000052684 (TF-TG) ENSMUSG00000046410	false
17070	TF-TG	ENSMUSG00000052684 (TF-TG) ENSMUSG00000046215	false
17069	TF-TG	ENSMUSG00000052684 (TF-TG) ENSMUSG00000046160	false
17064	TF-TG	ENSMUSG00000052684 (TF-TG) ENSMUSG00000045896	false
17062	TF-TG	ENSMUSG00000052684 (TF-TG) ENSMUSG00000045838	false
17061	TF-TG	ENSMUSG00000052684 (TF-TG) ENSMUSG00000045790	false
17052	TF-TG	ENSMUSG00000052684 (TF-TG) ENSMUSG00000045215	false
17047	TF-TG	ENSMUSG00000052684 (TF-TG) ENSMUSG00000044933	false
17043	TF-TG	ENSMUSG00000052684 (TF-TG) ENSMUSG00000044548	false
17038	TF-TG	ENSMUSG00000052684 (TF-TG) ENSMUSG00000044288	false
17034	TF-TG	ENSMUSG00000052684 (TF-TG) ENSMUSG00000044026	false
17033	TF-TG	ENSMUSG00000052684 (TF-TG) ENSMUSG00000044017	false
17031	TF-TG	ENSMUSG00000052684 (TF-TG) ENSMUSG00000043885	false
17024	TF-TG	ENSMUSG00000052684 (TF-TG) ENSMUSG00000043154	false
17015	TF-TG	ENSMUSG00000052684 (TF-TG) ENSMUSG00000042751	false
17014	TF-TG	ENSMUSG00000052684 (TF-TG) ENSMUSG00000042734	false
17013	TF-TG	ENSMUSG00000052684 (TF-TG) ENSMUSG00000042712	false
17008	TF-TG	ENSMUSG00000052684 (TF-TG) ENSMUSG00000042564	false
17006	TF-TG	ENSMUSG00000052684 (TF-TG) ENSMUSG00000042501	false
17004	TF-TG	ENSMUSG00000052684 (TF-TG) ENSMUSG00000042429	false
17000	TF-TG	ENSMUSG00000052684 (TF-TG) ENSMUSG00000042306	false
16998	TF-TG	ENSMUSG00000052684 (TF-TG) ENSMUSG00000042251	false
16995	TF-TG	ENSMUSG00000052684 (TF-TG) ENSMUSG00000042099	false
16991	TF-TG	ENSMUSG00000052684 (TF-TG) ENSMUSG00000042010	false
16989	TF-TG	ENSMUSG00000052684 (TF-TG) ENSMUSG00000041974	false
16988	TF-TG	ENSMUSG00000052684 (TF-TG) ENSMUSG00000041945	false
16980	TF-TG	ENSMUSG00000052684 (TF-TG) ENSMUSG00000041609	false
16978	TF-TG	ENSMUSG00000052684 (TF-TG) ENSMUSG00000041570	false
16973	TF-TG	ENSMUSG00000052684 (TF-TG) ENSMUSG00000041420	false
16969	TF-TG	ENSMUSG00000052684 (TF-TG) ENSMUSG00000041193	false
16966	TF-TG	ENSMUSG00000052684 (TF-TG) ENSMUSG00000041126	false
16965	TF-TG	ENSMUSG00000052684 (TF-TG) ENSMUSG00000041120	false
16964	TF-TG	ENSMUSG00000052684 (TF-TG) ENSMUSG00000041096	false
16958	TF-TG	ENSMUSG00000052684 (TF-TG) ENSMUSG00000041000	false
16955	TF-TG	ENSMUSG00000052684 (TF-TG) ENSMUSG00000040972	false
16948	TF-TG	ENSMUSG00000052684 (TF-TG) ENSMUSG00000040663	false
16945	TF-TG	ENSMUSG00000052684 (TF-TG) ENSMUSG00000040624	false
16943	TF-TG	ENSMUSG00000052684 (TF-TG) ENSMUSG00000040495	false
16934	TF-TG	ENSMUSG00000052684 (TF-TG) ENSMUSG00000040276	false
16932	TF-TG	ENSMUSG00000052684 (TF-TG) ENSMUSG00000040209	false
16931	TF-TG	ENSMUSG00000052684 (TF-TG) ENSMUSG00000040181	false
16923	TF-TG	ENSMUSG00000052684 (TF-TG) ENSMUSG00000039958	false
16917	TF-TG	ENSMUSG00000052684 (TF-TG) ENSMUSG00000039814	false
16915	TF-TG	ENSMUSG00000052684 (TF-TG) ENSMUSG00000039809	false
16914	TF-TG	ENSMUSG00000052684 (TF-TG) ENSMUSG00000039740	false
16913	TF-TG	ENSMUSG00000052684 (TF-TG) ENSMUSG00000039693	false
16909	TF-TG	ENSMUSG00000052684 (TF-TG) ENSMUSG00000039620	false
16907	TF-TG	ENSMUSG00000052684 (TF-TG) ENSMUSG00000039497	false
16905	TF-TG	ENSMUSG00000052684 (TF-TG) ENSMUSG00000039396	false
16904	TF-TG	ENSMUSG00000052684 (TF-TG) ENSMUSG00000039384	false
16903	TF-TG	ENSMUSG00000052684 (TF-TG) ENSMUSG00000039372	false
16901	TF-TG	ENSMUSG00000052684 (TF-TG) ENSMUSG00000039304	false
16900	TF-TG	ENSMUSG00000052684 (TF-TG) ENSMUSG00000039270	false
16896	TF-TG	ENSMUSG00000052684 (TF-TG) ENSMUSG00000039168	false
16895	TF-TG	ENSMUSG00000052684 (TF-TG) ENSMUSG00000039166	false
16893	TF-TG	ENSMUSG00000052684 (TF-TG) ENSMUSG00000039157	false
16891	TF-TG	ENSMUSG00000052684 (TF-TG) ENSMUSG00000039115	false
16889	TF-TG	ENSMUSG00000052684 (TF-TG) ENSMUSG00000039059	false
16886	TF-TG	ENSMUSG00000052684 (TF-TG) ENSMUSG00000039005	false
16885	TF-TG	ENSMUSG00000052684 (TF-TG) ENSMUSG00000038984	false
16878	TF-TG	ENSMUSG00000052684 (TF-TG) ENSMUSG00000038768	false
16877	TF-TG	ENSMUSG00000052684 (TF-TG) ENSMUSG00000038740	false
16875	TF-TG	ENSMUSG00000052684 (TF-TG) ENSMUSG00000038644	false
16873	TF-TG	ENSMUSG00000052684 (TF-TG) ENSMUSG00000038580	false
16869	TF-TG	ENSMUSG00000052684 (TF-TG) ENSMUSG00000038456	false
16862	TF-TG	ENSMUSG00000052684 (TF-TG) ENSMUSG00000038319	false
16860	TF-TG	ENSMUSG00000052684 (TF-TG) ENSMUSG00000038255	false
16859	TF-TG	ENSMUSG00000052684 (TF-TG) ENSMUSG00000038181	false
16851	TF-TG	ENSMUSG00000052684 (TF-TG) ENSMUSG00000037855	false
16848	TF-TG	ENSMUSG00000052684 (TF-TG) ENSMUSG00000037712	false
16847	TF-TG	ENSMUSG00000052684 (TF-TG) ENSMUSG00000037709	false
16846	TF-TG	ENSMUSG00000052684 (TF-TG) ENSMUSG00000037686	false
16842	TF-TG	ENSMUSG00000052684 (TF-TG) ENSMUSG00000037628	false
16837	TF-TG	ENSMUSG00000052684 (TF-TG) ENSMUSG00000037541	false
16835	TF-TG	ENSMUSG00000052684 (TF-TG) ENSMUSG00000037493	false
16833	TF-TG	ENSMUSG00000052684 (TF-TG) ENSMUSG00000037440	false
16827	TF-TG	ENSMUSG00000052684 (TF-TG) ENSMUSG00000037348	false
16816	TF-TG	ENSMUSG00000052684 (TF-TG) ENSMUSG00000037005	false
16809	TF-TG	ENSMUSG00000052684 (TF-TG) ENSMUSG00000036832	false
16806	TF-TG	ENSMUSG00000052684 (TF-TG) ENSMUSG00000036745	false
16805	TF-TG	ENSMUSG00000052684 (TF-TG) ENSMUSG00000036667	false
16804	TF-TG	ENSMUSG00000052684 (TF-TG) ENSMUSG00000036599	false
16799	TF-TG	ENSMUSG00000052684 (TF-TG) ENSMUSG00000036306	false
29084	TF-TG	ENSMUSG00000026586 (TF-TG) ENSMUSG00000000567	false
16795	TF-TG	ENSMUSG00000052684 (TF-TG) ENSMUSG00000036181	false
29082	TF-TG	ENSMUSG00000021994 (TF-TG) ENSMUSG00000030110	false
16793	TF-TG	ENSMUSG00000052684 (TF-TG) ENSMUSG00000036053	false
29079	TF-lincRNA	ENSMUSG00000021944 (TF-lincRNA) ENSMUSG00000102123	false
16784	TF-TG	ENSMUSG00000052684 (TF-TG) ENSMUSG00000035780	false
29071	TF-lincRNA	ENSMUSG00000021944 (TF-lincRNA) ENSMUSG00000097281	false
29070	TF-lincRNA	ENSMUSG00000021944 (TF-lincRNA) ENSMUSG00000085017	false
16779	TF-TG	ENSMUSG00000052684 (TF-TG) ENSMUSG00000035506	false
16778	TF-TG	ENSMUSG00000052684 (TF-TG) ENSMUSG00000035504	false
16777	TF-TG	ENSMUSG00000052684 (TF-TG) ENSMUSG00000035473	false
29064	TF-TG	ENSMUSG00000021944 (TF-TG) ENSMUSG00000091243	false
16776	TF-TG	ENSMUSG00000052684 (TF-TG) ENSMUSG00000035451	false
16773	TF-TG	ENSMUSG00000052684 (TF-TG) ENSMUSG00000035299	false
29057	TF-TG	ENSMUSG00000021944 (TF-TG) ENSMUSG00000078349	false
16769	TF-TG	ENSMUSG00000052684 (TF-TG) ENSMUSG00000035235	false
16767	TF-TG	ENSMUSG00000052684 (TF-TG) ENSMUSG00000035181	false
29052	TF-TG	ENSMUSG00000021944 (TF-TG) ENSMUSG00000074207	false
16764	TF-TG	ENSMUSG00000052684 (TF-TG) ENSMUSG00000035109	false
16762	TF-TG	ENSMUSG00000052684 (TF-TG) ENSMUSG00000035095	false
29049	TF-TG	ENSMUSG00000021944 (TF-TG) ENSMUSG00000071506	false
29046	TF-TG	ENSMUSG00000021944 (TF-TG) ENSMUSG00000070733	false
16756	TF-TG	ENSMUSG00000052684 (TF-TG) ENSMUSG00000034825	false
29039	TF-TG	ENSMUSG00000021944 (TF-TG) ENSMUSG00000068617	false
16751	TF-TG	ENSMUSG00000052684 (TF-TG) ENSMUSG00000034724	false
29037	TF-TG	ENSMUSG00000021944 (TF-TG) ENSMUSG00000067279	false
16746	TF-TG	ENSMUSG00000052684 (TF-TG) ENSMUSG00000034593	false
29033	TF-TG	ENSMUSG00000021944 (TF-TG) ENSMUSG00000064247	false
16745	TF-TG	ENSMUSG00000052684 (TF-TG) ENSMUSG00000034586	false
16743	TF-TG	ENSMUSG00000052684 (TF-TG) ENSMUSG00000034573	false
29030	TF-TG	ENSMUSG00000021944 (TF-TG) ENSMUSG00000064080	false
16742	TF-TG	ENSMUSG00000052684 (TF-TG) ENSMUSG00000034528	false
16738	TF-TG	ENSMUSG00000052684 (TF-TG) ENSMUSG00000034379	false
29023	TF-TG	ENSMUSG00000021944 (TF-TG) ENSMUSG00000061838	false
16735	TF-TG	ENSMUSG00000052684 (TF-TG) ENSMUSG00000034164	false
16733	TF-TG	ENSMUSG00000052684 (TF-TG) ENSMUSG00000034118	false
29019	TF-TG	ENSMUSG00000021944 (TF-TG) ENSMUSG00000061397	false
16731	TF-TG	ENSMUSG00000052684 (TF-TG) ENSMUSG00000034006	false
16730	TF-TG	ENSMUSG00000052684 (TF-TG) ENSMUSG00000033952	false
16728	TF-TG	ENSMUSG00000052684 (TF-TG) ENSMUSG00000033900	false
16726	TF-TG	ENSMUSG00000052684 (TF-TG) ENSMUSG00000033825	false
29013	TF-TG	ENSMUSG00000021944 (TF-TG) ENSMUSG00000059401	false
29012	TF-TG	ENSMUSG00000021944 (TF-TG) ENSMUSG00000059060	false
16724	TF-TG	ENSMUSG00000052684 (TF-TG) ENSMUSG00000033717	false
16723	TF-TG	ENSMUSG00000052684 (TF-TG) ENSMUSG00000033705	false
29010	TF-TG	ENSMUSG00000021944 (TF-TG) ENSMUSG00000058952	false
29009	TF-TG	ENSMUSG00000021944 (TF-TG) ENSMUSG00000058624	false
16719	TF-TG	ENSMUSG00000052684 (TF-TG) ENSMUSG00000033581	false
16718	TF-TG	ENSMUSG00000052684 (TF-TG) ENSMUSG00000033579	false
29005	TF-TG	ENSMUSG00000021944 (TF-TG) ENSMUSG00000056895	false
29004	TF-TG	ENSMUSG00000021944 (TF-TG) ENSMUSG00000056832	false
29002	TF-TG	ENSMUSG00000021944 (TF-TG) ENSMUSG00000056671	false
16713	TF-TG	ENSMUSG00000052684 (TF-TG) ENSMUSG00000033308	false
16712	TF-TG	ENSMUSG00000052684 (TF-TG) ENSMUSG00000033307	false
28999	TF-TG	ENSMUSG00000021944 (TF-TG) ENSMUSG00000056035	false
28997	TF-TG	ENSMUSG00000021944 (TF-TG) ENSMUSG00000055745	false
28996	TF-TG	ENSMUSG00000021944 (TF-TG) ENSMUSG00000055730	false
16702	TF-TG	ENSMUSG00000052684 (TF-TG) ENSMUSG00000033061	false
28988	TF-TG	ENSMUSG00000021944 (TF-TG) ENSMUSG00000053768	false
16698	TF-TG	ENSMUSG00000052684 (TF-TG) ENSMUSG00000032965	false
28985	TF-TG	ENSMUSG00000021944 (TF-TG) ENSMUSG00000053317	false
28983	TF-TG	ENSMUSG00000021944 (TF-TG) ENSMUSG00000052396	false
16694	TF-TG	ENSMUSG00000052684 (TF-TG) ENSMUSG00000032883	false
28980	TF-TG	ENSMUSG00000021944 (TF-TG) ENSMUSG00000051977	false
28978	TF-TG	ENSMUSG00000021944 (TF-TG) ENSMUSG00000050953	false
28976	TF-TG	ENSMUSG00000021944 (TF-TG) ENSMUSG00000050335	false
28975	TF-TG	ENSMUSG00000021944 (TF-TG) ENSMUSG00000050323	false
28973	TF-TG	ENSMUSG00000021944 (TF-TG) ENSMUSG00000049892	false
28970	TF-TG	ENSMUSG00000021944 (TF-TG) ENSMUSG00000048970	false
28969	TF-TG	ENSMUSG00000021944 (TF-TG) ENSMUSG00000048965	false
16681	TF-TG	ENSMUSG00000052684 (TF-TG) ENSMUSG00000032702	false
16680	TF-TG	ENSMUSG00000052684 (TF-TG) ENSMUSG00000032666	false
16677	TF-TG	ENSMUSG00000052684 (TF-TG) ENSMUSG00000032531	false
28963	TF-TG	ENSMUSG00000021944 (TF-TG) ENSMUSG00000047730	false
28962	TF-TG	ENSMUSG00000021944 (TF-TG) ENSMUSG00000047728	false
16674	TF-TG	ENSMUSG00000052684 (TF-TG) ENSMUSG00000032454	false
28959	TF-TG	ENSMUSG00000021944 (TF-TG) ENSMUSG00000047205	false
16671	TF-TG	ENSMUSG00000052684 (TF-TG) ENSMUSG00000032373	false
16669	TF-TG	ENSMUSG00000052684 (TF-TG) ENSMUSG00000032358	false
28956	TF-TG	ENSMUSG00000021944 (TF-TG) ENSMUSG00000046410	false
16668	TF-TG	ENSMUSG00000052684 (TF-TG) ENSMUSG00000032356	false
16667	TF-TG	ENSMUSG00000052684 (TF-TG) ENSMUSG00000032338	false
16662	TF-TG	ENSMUSG00000052684 (TF-TG) ENSMUSG00000032285	false
28946	TF-TG	ENSMUSG00000021944 (TF-TG) ENSMUSG00000044912	false
16658	TF-TG	ENSMUSG00000052684 (TF-TG) ENSMUSG00000032202	false
28944	TF-TG	ENSMUSG00000021944 (TF-TG) ENSMUSG00000044033	false
28943	TF-TG	ENSMUSG00000021944 (TF-TG) ENSMUSG00000044026	false
28942	TF-TG	ENSMUSG00000021944 (TF-TG) ENSMUSG00000044017	false
16654	TF-TG	ENSMUSG00000052684 (TF-TG) ENSMUSG00000032083	false
28940	TF-TG	ENSMUSG00000021944 (TF-TG) ENSMUSG00000043461	false
28936	TF-TG	ENSMUSG00000021944 (TF-TG) ENSMUSG00000042686	false
24839	TF-TG	ENSMUSG00000030087 (TF-TG) ENSMUSG00000042429	false
24838	TF-TG	ENSMUSG00000030087 (TF-TG) ENSMUSG00000039059	false
28934	TF-TG	ENSMUSG00000021944 (TF-TG) ENSMUSG00000042429	false
28933	TF-TG	ENSMUSG00000021944 (TF-TG) ENSMUSG00000042155	false
16645	TF-TG	ENSMUSG00000052684 (TF-TG) ENSMUSG00000031902	false
24836	TF-TG	ENSMUSG00000030087 (TF-TG) ENSMUSG00000037709	false
28931	TF-TG	ENSMUSG00000021944 (TF-TG) ENSMUSG00000042010	false
28930	TF-TG	ENSMUSG00000021944 (TF-TG) ENSMUSG00000041974	false
24832	TF-TG	ENSMUSG00000030087 (TF-TG) ENSMUSG00000028749	false
28928	TF-TG	ENSMUSG00000021944 (TF-TG) ENSMUSG00000041889	false
16639	TF-TG	ENSMUSG00000052684 (TF-TG) ENSMUSG00000031833	false
28926	TF-TG	ENSMUSG00000021944 (TF-TG) ENSMUSG00000041570	false
28925	TF-TG	ENSMUSG00000021944 (TF-TG) ENSMUSG00000041096	false
24828	TF-TG	ENSMUSG00000030087 (TF-TG) ENSMUSG00000024533	false
16636	TF-TG	ENSMUSG00000052684 (TF-TG) ENSMUSG00000031790	false
24827	TF-TG	ENSMUSG00000030087 (TF-TG) ENSMUSG00000022435	false
28922	TF-TG	ENSMUSG00000021944 (TF-TG) ENSMUSG00000040624	false
24825	TF-TG	ENSMUSG00000030087 (TF-TG) ENSMUSG00000020747	false
28919	TF-TG	ENSMUSG00000021944 (TF-TG) ENSMUSG00000040209	false
28918	TF-TG	ENSMUSG00000021944 (TF-TG) ENSMUSG00000040136	false
24821	TF-TG	ENSMUSG00000030087 (TF-TG) ENSMUSG00000008090	false
24819	TF-TG	ENSMUSG00000030087 (TF-TG) ENSMUSG00000001901	false
28915	TF-TG	ENSMUSG00000021944 (TF-TG) ENSMUSG00000039958	false
16626	TF-TG	ENSMUSG00000052684 (TF-TG) ENSMUSG00000031586	false
16625	TF-TG	ENSMUSG00000052684 (TF-TG) ENSMUSG00000031584	false
28912	TF-TG	ENSMUSG00000021944 (TF-TG) ENSMUSG00000039740	false
16624	TF-TG	ENSMUSG00000052684 (TF-TG) ENSMUSG00000031562	false
16623	TF-TG	ENSMUSG00000052684 (TF-TG) ENSMUSG00000031558	false
28910	TF-TG	ENSMUSG00000021944 (TF-TG) ENSMUSG00000039497	false
28908	TF-TG	ENSMUSG00000021944 (TF-TG) ENSMUSG00000039270	false
28907	TF-TG	ENSMUSG00000021944 (TF-TG) ENSMUSG00000039115	false
16616	TF-TG	ENSMUSG00000052684 (TF-TG) ENSMUSG00000031448	false
28902	TF-TG	ENSMUSG00000021944 (TF-TG) ENSMUSG00000038456	false
16613	TF-TG	ENSMUSG00000052684 (TF-TG) ENSMUSG00000031378	false
28899	TF-TG	ENSMUSG00000021944 (TF-TG) ENSMUSG00000038319	false
16609	TF-TG	ENSMUSG00000052684 (TF-TG) ENSMUSG00000031353	false
16608	TF-TG	ENSMUSG00000052684 (TF-TG) ENSMUSG00000031351	false
16607	TF-TG	ENSMUSG00000052684 (TF-TG) ENSMUSG00000031327	false
28893	TF-TG	ENSMUSG00000021944 (TF-TG) ENSMUSG00000037712	false
28888	TF-TG	ENSMUSG00000021944 (TF-TG) ENSMUSG00000037541	false
28887	TF-TG	ENSMUSG00000021944 (TF-TG) ENSMUSG00000037440	false
28875	TF-TG	ENSMUSG00000021944 (TF-TG) ENSMUSG00000035780	false
16587	TF-TG	ENSMUSG00000052684 (TF-TG) ENSMUSG00000030659	false
28872	TF-TG	ENSMUSG00000021944 (TF-TG) ENSMUSG00000035299	false
16584	TF-TG	ENSMUSG00000052684 (TF-TG) ENSMUSG00000030510	false
28871	TF-TG	ENSMUSG00000021944 (TF-TG) ENSMUSG00000035181	false
28864	TF-TG	ENSMUSG00000021944 (TF-TG) ENSMUSG00000034528	false
16573	TF-TG	ENSMUSG00000052684 (TF-TG) ENSMUSG00000030137	false
28860	TF-TG	ENSMUSG00000021944 (TF-TG) ENSMUSG00000034006	false
16572	TF-TG	ENSMUSG00000052684 (TF-TG) ENSMUSG00000030107	false
16571	TF-TG	ENSMUSG00000052684 (TF-TG) ENSMUSG00000030087	false
28858	TF-TG	ENSMUSG00000021944 (TF-TG) ENSMUSG00000033900	false
28857	TF-TG	ENSMUSG00000021944 (TF-TG) ENSMUSG00000033581	false
28854	TF-TG	ENSMUSG00000021944 (TF-TG) ENSMUSG00000033307	false
16565	TF-TG	ENSMUSG00000052684 (TF-TG) ENSMUSG00000029910	false
16561	TF-TG	ENSMUSG00000052684 (TF-TG) ENSMUSG00000029811	false
28848	TF-TG	ENSMUSG00000021944 (TF-TG) ENSMUSG00000032965	false
16557	TF-TG	ENSMUSG00000052684 (TF-TG) ENSMUSG00000029762	false
28841	TF-TG	ENSMUSG00000021944 (TF-TG) ENSMUSG00000032353	false
28840	TF-TG	ENSMUSG00000021944 (TF-TG) ENSMUSG00000032338	false
28838	TF-TG	ENSMUSG00000021944 (TF-TG) ENSMUSG00000032251	false
28835	TF-TG	ENSMUSG00000021944 (TF-TG) ENSMUSG00000032083	false
16547	TF-TG	ENSMUSG00000052684 (TF-TG) ENSMUSG00000029436	false
16545	TF-TG	ENSMUSG00000052684 (TF-TG) ENSMUSG00000029380	false
16540	TF-TG	ENSMUSG00000052684 (TF-TG) ENSMUSG00000029287	false
16539	TF-TG	ENSMUSG00000052684 (TF-TG) ENSMUSG00000029245	false
28824	TF-TG	ENSMUSG00000021944 (TF-TG) ENSMUSG00000031586	false
16536	TF-TG	ENSMUSG00000052684 (TF-TG) ENSMUSG00000029168	false
28823	TF-TG	ENSMUSG00000021944 (TF-TG) ENSMUSG00000031584	false
16533	TF-TG	ENSMUSG00000052684 (TF-TG) ENSMUSG00000029153	false
16530	TF-TG	ENSMUSG00000052684 (TF-TG) ENSMUSG00000029121	false
16527	TF-TG	ENSMUSG00000052684 (TF-TG) ENSMUSG00000029059	false
16526	TF-TG	ENSMUSG00000052684 (TF-TG) ENSMUSG00000028986	false
16524	TF-TG	ENSMUSG00000052684 (TF-TG) ENSMUSG00000028940	false
28808	TF-TG	ENSMUSG00000021944 (TF-TG) ENSMUSG00000029380	false
16518	TF-TG	ENSMUSG00000052684 (TF-TG) ENSMUSG00000028763	false
16517	TF-TG	ENSMUSG00000052684 (TF-TG) ENSMUSG00000028749	false
28800	TF-TG	ENSMUSG00000021944 (TF-TG) ENSMUSG00000028518	false
28794	TF-TG	ENSMUSG00000021944 (TF-TG) ENSMUSG00000028024	false
16505	TF-TG	ENSMUSG00000052684 (TF-TG) ENSMUSG00000028518	false
28791	TF-TG	ENSMUSG00000021944 (TF-TG) ENSMUSG00000027715	false
28790	TF-TG	ENSMUSG00000021944 (TF-TG) ENSMUSG00000027698	false
16502	TF-TG	ENSMUSG00000052684 (TF-TG) ENSMUSG00000028435	false
28789	TF-TG	ENSMUSG00000021944 (TF-TG) ENSMUSG00000027611	false
28786	TF-TG	ENSMUSG00000021944 (TF-TG) ENSMUSG00000027469	false
28785	TF-TG	ENSMUSG00000021944 (TF-TG) ENSMUSG00000027420	false
16497	TF-TG	ENSMUSG00000052684 (TF-TG) ENSMUSG00000028289	false
28782	TF-TG	ENSMUSG00000021944 (TF-TG) ENSMUSG00000027346	false
16492	TF-TG	ENSMUSG00000052684 (TF-TG) ENSMUSG00000028223	false
28779	TF-TG	ENSMUSG00000021944 (TF-TG) ENSMUSG00000027074	false
28770	TF-TG	ENSMUSG00000021944 (TF-TG) ENSMUSG00000026479	false
16482	TF-TG	ENSMUSG00000052684 (TF-TG) ENSMUSG00000028024	false
28768	TF-TG	ENSMUSG00000021944 (TF-TG) ENSMUSG00000026442	false
28767	TF-TG	ENSMUSG00000021944 (TF-TG) ENSMUSG00000026430	false
28764	TF-TG	ENSMUSG00000021944 (TF-TG) ENSMUSG00000026311	false
28757	TF-TG	ENSMUSG00000021944 (TF-TG) ENSMUSG00000025779	false
16469	TF-TG	ENSMUSG00000052684 (TF-TG) ENSMUSG00000027805	false
28755	TF-TG	ENSMUSG00000021944 (TF-TG) ENSMUSG00000025652	false
28752	TF-TG	ENSMUSG00000021944 (TF-TG) ENSMUSG00000025576	false
16463	TF-TG	ENSMUSG00000052684 (TF-TG) ENSMUSG00000027698	false
16460	TF-TG	ENSMUSG00000052684 (TF-TG) ENSMUSG00000027661	false
16459	TF-TG	ENSMUSG00000052684 (TF-TG) ENSMUSG00000027654	false
16458	TF-TG	ENSMUSG00000052684 (TF-TG) ENSMUSG00000027611	false
28742	TF-TG	ENSMUSG00000021944 (TF-TG) ENSMUSG00000024978	false
28741	TF-TG	ENSMUSG00000021944 (TF-TG) ENSMUSG00000024960	false
16452	TF-TG	ENSMUSG00000052684 (TF-TG) ENSMUSG00000027469	false
16451	TF-TG	ENSMUSG00000052684 (TF-TG) ENSMUSG00000027447	false
16450	TF-TG	ENSMUSG00000052684 (TF-TG) ENSMUSG00000027438	false
16448	TF-TG	ENSMUSG00000052684 (TF-TG) ENSMUSG00000027420	false
28734	TF-TG	ENSMUSG00000021944 (TF-TG) ENSMUSG00000024738	false
28733	TF-TG	ENSMUSG00000021944 (TF-TG) ENSMUSG00000024713	false
28731	TF-TG	ENSMUSG00000021944 (TF-TG) ENSMUSG00000024548	false
16443	TF-TG	ENSMUSG00000052684 (TF-TG) ENSMUSG00000027346	false
28729	TF-TG	ENSMUSG00000021944 (TF-TG) ENSMUSG00000024424	false
28726	TF-TG	ENSMUSG00000021944 (TF-TG) ENSMUSG00000024352	false
16438	TF-TG	ENSMUSG00000052684 (TF-TG) ENSMUSG00000027254	false
28725	TF-TG	ENSMUSG00000021944 (TF-TG) ENSMUSG00000024292	false
16435	TF-TG	ENSMUSG00000052684 (TF-TG) ENSMUSG00000027219	false
16434	TF-TG	ENSMUSG00000052684 (TF-TG) ENSMUSG00000027187	false
28721	TF-TG	ENSMUSG00000021944 (TF-TG) ENSMUSG00000024175	false
16432	TF-TG	ENSMUSG00000052684 (TF-TG) ENSMUSG00000027075	false
28719	TF-TG	ENSMUSG00000021944 (TF-TG) ENSMUSG00000024063	false
16431	TF-TG	ENSMUSG00000052684 (TF-TG) ENSMUSG00000027074	false
28717	TF-TG	ENSMUSG00000021944 (TF-TG) ENSMUSG00000023247	false
16428	TF-TG	ENSMUSG00000052684 (TF-TG) ENSMUSG00000026981	false
28715	TF-TG	ENSMUSG00000021944 (TF-TG) ENSMUSG00000023045	false
28711	TF-TG	ENSMUSG00000021944 (TF-TG) ENSMUSG00000023015	false
28709	TF-TG	ENSMUSG00000021944 (TF-TG) ENSMUSG00000022742	false
16421	TF-TG	ENSMUSG00000052684 (TF-TG) ENSMUSG00000026848	false
28707	TF-TG	ENSMUSG00000021944 (TF-TG) ENSMUSG00000022619	false
16417	TF-TG	ENSMUSG00000052684 (TF-TG) ENSMUSG00000026786	false
16416	TF-TG	ENSMUSG00000052684 (TF-TG) ENSMUSG00000026785	false
28703	TF-TG	ENSMUSG00000021944 (TF-TG) ENSMUSG00000022435	false
16412	TF-TG	ENSMUSG00000052684 (TF-TG) ENSMUSG00000026692	false
16411	TF-TG	ENSMUSG00000052684 (TF-TG) ENSMUSG00000026688	false
28698	TF-TG	ENSMUSG00000021944 (TF-TG) ENSMUSG00000022178	false
28696	TF-TG	ENSMUSG00000021944 (TF-TG) ENSMUSG00000022051	false
16407	TF-TG	ENSMUSG00000052684 (TF-TG) ENSMUSG00000026586	false
16406	TF-TG	ENSMUSG00000052684 (TF-TG) ENSMUSG00000026548	false
28693	TF-TG	ENSMUSG00000021944 (TF-TG) ENSMUSG00000021928	false
28692	TF-TG	ENSMUSG00000021944 (TF-TG) ENSMUSG00000021913	false
28690	TF-TG	ENSMUSG00000021944 (TF-TG) ENSMUSG00000021798	false
28687	TF-TG	ENSMUSG00000021944 (TF-TG) ENSMUSG00000021608	false
16399	TF-TG	ENSMUSG00000052684 (TF-TG) ENSMUSG00000026483	false
16398	TF-TG	ENSMUSG00000052684 (TF-TG) ENSMUSG00000026479	false
28683	TF-TG	ENSMUSG00000021944 (TF-TG) ENSMUSG00000021367	false
16395	TF-TG	ENSMUSG00000052684 (TF-TG) ENSMUSG00000026443	false
16394	TF-TG	ENSMUSG00000052684 (TF-TG) ENSMUSG00000026442	false
16393	TF-TG	ENSMUSG00000052684 (TF-TG) ENSMUSG00000026430	false
16392	TF-TG	ENSMUSG00000052684 (TF-TG) ENSMUSG00000026417	false
28678	TF-TG	ENSMUSG00000021944 (TF-TG) ENSMUSG00000020986	false
16387	TF-TG	ENSMUSG00000052684 (TF-TG) ENSMUSG00000026321	false
28674	TF-TG	ENSMUSG00000021944 (TF-TG) ENSMUSG00000020788	false
16386	TF-TG	ENSMUSG00000052684 (TF-TG) ENSMUSG00000026311	false
28672	TF-TG	ENSMUSG00000021944 (TF-TG) ENSMUSG00000020696	false
16384	TF-TG	ENSMUSG00000052684 (TF-TG) ENSMUSG00000026247	false
28671	TF-TG	ENSMUSG00000021944 (TF-TG) ENSMUSG00000020668	false
28670	TF-TG	ENSMUSG00000021944 (TF-TG) ENSMUSG00000020658	false
28669	TF-TG	ENSMUSG00000021944 (TF-TG) ENSMUSG00000020599	false
28668	TF-TG	ENSMUSG00000021944 (TF-TG) ENSMUSG00000020462	false
28660	TF-TG	ENSMUSG00000021944 (TF-TG) ENSMUSG00000020121	false
28659	TF-TG	ENSMUSG00000021944 (TF-TG) ENSMUSG00000020105	false
16371	TF-TG	ENSMUSG00000052684 (TF-TG) ENSMUSG00000025991	false
16365	TF-TG	ENSMUSG00000052684 (TF-TG) ENSMUSG00000025876	false
28651	TF-TG	ENSMUSG00000021944 (TF-TG) ENSMUSG00000019647	false
16361	TF-TG	ENSMUSG00000052684 (TF-TG) ENSMUSG00000025779	false
16358	TF-TG	ENSMUSG00000052684 (TF-TG) ENSMUSG00000025726	false
16357	TF-TG	ENSMUSG00000052684 (TF-TG) ENSMUSG00000025652	false
16353	TF-TG	ENSMUSG00000052684 (TF-TG) ENSMUSG00000025576	false
16352	TF-TG	ENSMUSG00000052684 (TF-TG) ENSMUSG00000025557	false
16350	TF-TG	ENSMUSG00000052684 (TF-TG) ENSMUSG00000025479	false
28637	TF-TG	ENSMUSG00000021944 (TF-TG) ENSMUSG00000014846	false
16346	TF-TG	ENSMUSG00000052684 (TF-TG) ENSMUSG00000025428	false
16345	TF-TG	ENSMUSG00000052684 (TF-TG) ENSMUSG00000025410	false
16342	TF-TG	ENSMUSG00000052684 (TF-TG) ENSMUSG00000025351	false
16338	TF-TG	ENSMUSG00000052684 (TF-TG) ENSMUSG00000025227	false
16337	TF-TG	ENSMUSG00000052684 (TF-TG) ENSMUSG00000025207	false
28624	TF-TG	ENSMUSG00000021944 (TF-TG) ENSMUSG00000005973	false
28623	TF-TG	ENSMUSG00000021944 (TF-TG) ENSMUSG00000005958	false
28619	TF-TG	ENSMUSG00000021944 (TF-TG) ENSMUSG00000005355	false
16328	TF-TG	ENSMUSG00000052684 (TF-TG) ENSMUSG00000025150	false
28615	TF-TG	ENSMUSG00000021944 (TF-TG) ENSMUSG00000004558	false
16327	TF-TG	ENSMUSG00000052684 (TF-TG) ENSMUSG00000025081	false
28613	TF-TG	ENSMUSG00000021944 (TF-TG) ENSMUSG00000004151	false
28611	TF-TG	ENSMUSG00000021944 (TF-TG) ENSMUSG00000003949	false
28608	TF-TG	ENSMUSG00000021944 (TF-TG) ENSMUSG00000001901	false
16319	TF-TG	ENSMUSG00000052684 (TF-TG) ENSMUSG00000024978	false
28606	TF-TG	ENSMUSG00000021944 (TF-TG) ENSMUSG00000001225	false
16318	TF-TG	ENSMUSG00000052684 (TF-TG) ENSMUSG00000024960	false
16316	TF-TG	ENSMUSG00000052684 (TF-TG) ENSMUSG00000024935	false
16314	TF-TG	ENSMUSG00000052684 (TF-TG) ENSMUSG00000024899	false
16313	TF-TG	ENSMUSG00000052684 (TF-TG) ENSMUSG00000024897	false
16309	TF-TG	ENSMUSG00000052684 (TF-TG) ENSMUSG00000024810	false
16303	TF-TG	ENSMUSG00000052684 (TF-TG) ENSMUSG00000024738	false
16301	TF-TG	ENSMUSG00000052684 (TF-TG) ENSMUSG00000024727	false
16300	TF-TG	ENSMUSG00000052684 (TF-TG) ENSMUSG00000024713	false
16297	TF-TG	ENSMUSG00000052684 (TF-TG) ENSMUSG00000024664	false
16296	TF-TG	ENSMUSG00000052684 (TF-TG) ENSMUSG00000024659	false
16289	TF-TG	ENSMUSG00000052684 (TF-TG) ENSMUSG00000024548	false
16288	TF-TG	ENSMUSG00000052684 (TF-TG) ENSMUSG00000024533	false
16282	TF-TG	ENSMUSG00000052684 (TF-TG) ENSMUSG00000024479	false
16281	TF-TG	ENSMUSG00000052684 (TF-TG) ENSMUSG00000024424	false
16278	TF-TG	ENSMUSG00000052684 (TF-TG) ENSMUSG00000024411	false
16274	TF-TG	ENSMUSG00000052684 (TF-TG) ENSMUSG00000024352	false
16269	TF-TG	ENSMUSG00000052684 (TF-TG) ENSMUSG00000024302	false
16264	TF-TG	ENSMUSG00000052684 (TF-TG) ENSMUSG00000024175	false
16258	TF-TG	ENSMUSG00000052684 (TF-TG) ENSMUSG00000024063	false
16257	TF-TG	ENSMUSG00000052684 (TF-TG) ENSMUSG00000024055	false
16253	TF-TG	ENSMUSG00000052684 (TF-TG) ENSMUSG00000024029	false
16249	TF-TG	ENSMUSG00000052684 (TF-TG) ENSMUSG00000023963	false
16243	TF-TG	ENSMUSG00000052684 (TF-TG) ENSMUSG00000023800	false
16239	TF-TG	ENSMUSG00000052684 (TF-TG) ENSMUSG00000023247	false
16238	TF-TG	ENSMUSG00000052684 (TF-TG) ENSMUSG00000023243	false
16234	TF-TG	ENSMUSG00000052684 (TF-TG) ENSMUSG00000023045	false
16230	TF-TG	ENSMUSG00000052684 (TF-TG) ENSMUSG00000023015	false
16221	TF-TG	ENSMUSG00000052684 (TF-TG) ENSMUSG00000022863	false
16220	TF-TG	ENSMUSG00000052684 (TF-TG) ENSMUSG00000022844	false
16218	TF-TG	ENSMUSG00000052684 (TF-TG) ENSMUSG00000022817	false
16214	TF-TG	ENSMUSG00000052684 (TF-TG) ENSMUSG00000022687	false
16213	TF-TG	ENSMUSG00000052684 (TF-TG) ENSMUSG00000022637	false
16211	TF-TG	ENSMUSG00000052684 (TF-TG) ENSMUSG00000022619	false
16206	TF-TG	ENSMUSG00000052684 (TF-TG) ENSMUSG00000022519	false
16203	TF-TG	ENSMUSG00000052684 (TF-TG) ENSMUSG00000022477	false
16202	TF-TG	ENSMUSG00000052684 (TF-TG) ENSMUSG00000022436	false
16201	TF-TG	ENSMUSG00000052684 (TF-TG) ENSMUSG00000022435	false
16194	TF-TG	ENSMUSG00000052684 (TF-TG) ENSMUSG00000022219	false
16189	TF-TG	ENSMUSG00000052684 (TF-TG) ENSMUSG00000022178	false
16180	TF-TG	ENSMUSG00000052684 (TF-TG) ENSMUSG00000022051	false
16177	TF-TG	ENSMUSG00000052684 (TF-TG) ENSMUSG00000022033	false
16174	TF-TG	ENSMUSG00000052684 (TF-TG) ENSMUSG00000021994	false
16170	TF-TG	ENSMUSG00000052684 (TF-TG) ENSMUSG00000021944	false
16169	TF-TG	ENSMUSG00000052684 (TF-TG) ENSMUSG00000021928	false
16168	TF-TG	ENSMUSG00000052684 (TF-TG) ENSMUSG00000021913	false
16163	TF-TG	ENSMUSG00000052684 (TF-TG) ENSMUSG00000021798	false
16162	TF-TG	ENSMUSG00000052684 (TF-TG) ENSMUSG00000021779	false
16158	TF-TG	ENSMUSG00000052684 (TF-TG) ENSMUSG00000021720	false
16156	TF-TG	ENSMUSG00000052684 (TF-TG) ENSMUSG00000021685	false
16153	TF-TG	ENSMUSG00000052684 (TF-TG) ENSMUSG00000021608	false
16152	TF-TG	ENSMUSG00000052684 (TF-TG) ENSMUSG00000021604	false
16145	TF-TG	ENSMUSG00000052684 (TF-TG) ENSMUSG00000021367	false
16142	TF-TG	ENSMUSG00000052684 (TF-TG) ENSMUSG00000021337	false
16141	TF-TG	ENSMUSG00000052684 (TF-TG) ENSMUSG00000021303	false
16139	TF-TG	ENSMUSG00000052684 (TF-TG) ENSMUSG00000021240	false
16137	TF-TG	ENSMUSG00000052684 (TF-TG) ENSMUSG00000021223	false
16135	TF-TG	ENSMUSG00000052684 (TF-TG) ENSMUSG00000021203	false
16133	TF-TG	ENSMUSG00000052684 (TF-TG) ENSMUSG00000021194	false
16130	TF-TG	ENSMUSG00000052684 (TF-TG) ENSMUSG00000021123	false
16113	TF-TG	ENSMUSG00000052684 (TF-TG) ENSMUSG00000020766	false
16112	TF-TG	ENSMUSG00000052684 (TF-TG) ENSMUSG00000020747	false
16110	TF-TG	ENSMUSG00000052684 (TF-TG) ENSMUSG00000020732	false
16108	TF-TG	ENSMUSG00000052684 (TF-TG) ENSMUSG00000020707	false
16107	TF-TG	ENSMUSG00000052684 (TF-TG) ENSMUSG00000020696	false
16105	TF-TG	ENSMUSG00000052684 (TF-TG) ENSMUSG00000020674	false
16104	TF-TG	ENSMUSG00000052684 (TF-TG) ENSMUSG00000020668	false
16103	TF-TG	ENSMUSG00000052684 (TF-TG) ENSMUSG00000020658	false
16102	TF-TG	ENSMUSG00000052684 (TF-TG) ENSMUSG00000020651	false
16098	TF-TG	ENSMUSG00000052684 (TF-TG) ENSMUSG00000020599	false
16096	TF-TG	ENSMUSG00000052684 (TF-TG) ENSMUSG00000020572	false
16093	TF-TG	ENSMUSG00000052684 (TF-TG) ENSMUSG00000020467	false
16092	TF-TG	ENSMUSG00000052684 (TF-TG) ENSMUSG00000020462	false
16089	TF-TG	ENSMUSG00000052684 (TF-TG) ENSMUSG00000020424	false
16086	TF-TG	ENSMUSG00000052684 (TF-TG) ENSMUSG00000020388	false
16081	TF-TG	ENSMUSG00000052684 (TF-TG) ENSMUSG00000020303	false
24272	TF-TG	ENSMUSG00000003949 (TF-TG) ENSMUSG00000072235	false
24268	TF-TG	ENSMUSG00000003949 (TF-TG) ENSMUSG00000060002	false
24266	TF-TG	ENSMUSG00000003949 (TF-TG) ENSMUSG00000055978	false
24263	TF-TG	ENSMUSG00000003949 (TF-TG) ENSMUSG00000052087	false
16070	TF-TG	ENSMUSG00000052684 (TF-TG) ENSMUSG00000020121	false
16069	TF-TG	ENSMUSG00000052684 (TF-TG) ENSMUSG00000020105	false
24260	TF-TG	ENSMUSG00000003949 (TF-TG) ENSMUSG00000049313	false
24255	TF-TG	ENSMUSG00000003949 (TF-TG) ENSMUSG00000045790	false
16063	TF-TG	ENSMUSG00000052684 (TF-TG) ENSMUSG00000020010	false
24253	TF-TG	ENSMUSG00000003949 (TF-TG) ENSMUSG00000042631	false
24252	TF-TG	ENSMUSG00000003949 (TF-TG) ENSMUSG00000042306	false
24249	TF-TG	ENSMUSG00000003949 (TF-TG) ENSMUSG00000040136	false
24248	TF-TG	ENSMUSG00000003949 (TF-TG) ENSMUSG00000039958	false
24246	TF-TG	ENSMUSG00000003949 (TF-TG) ENSMUSG00000039059	false
24243	TF-TG	ENSMUSG00000003949 (TF-TG) ENSMUSG00000038644	false
16051	TF-TG	ENSMUSG00000052684 (TF-TG) ENSMUSG00000019817	false
16049	TF-TG	ENSMUSG00000052684 (TF-TG) ENSMUSG00000019775	false
24239	TF-TG	ENSMUSG00000003949 (TF-TG) ENSMUSG00000036599	false
16046	TF-TG	ENSMUSG00000052684 (TF-TG) ENSMUSG00000019647	false
24236	TF-TG	ENSMUSG00000003949 (TF-TG) ENSMUSG00000034593	false
16044	TF-TG	ENSMUSG00000052684 (TF-TG) ENSMUSG00000019235	false
24231	TF-TG	ENSMUSG00000003949 (TF-TG) ENSMUSG00000032202	false
24230	TF-TG	ENSMUSG00000003949 (TF-TG) ENSMUSG00000031584	false
16034	TF-TG	ENSMUSG00000052684 (TF-TG) ENSMUSG00000018774	false
24224	TF-TG	ENSMUSG00000003949 (TF-TG) ENSMUSG00000026786	false
24223	TF-TG	ENSMUSG00000003949 (TF-TG) ENSMUSG00000026548	false
16031	TF-TG	ENSMUSG00000052684 (TF-TG) ENSMUSG00000018672	false
24220	TF-TG	ENSMUSG00000003949 (TF-TG) ENSMUSG00000025227	false
16025	TF-TG	ENSMUSG00000052684 (TF-TG) ENSMUSG00000018507	false
24216	TF-TG	ENSMUSG00000003949 (TF-TG) ENSMUSG00000023832	false
24213	TF-TG	ENSMUSG00000003949 (TF-TG) ENSMUSG00000021720	false
16021	TF-TG	ENSMUSG00000052684 (TF-TG) ENSMUSG00000018340	false
24212	TF-TG	ENSMUSG00000003949 (TF-TG) ENSMUSG00000021194	false
24210	TF-TG	ENSMUSG00000003949 (TF-TG) ENSMUSG00000020846	false
24201	TF-TG	ENSMUSG00000003949 (TF-TG) ENSMUSG00000004151	false
16009	TF-TG	ENSMUSG00000052684 (TF-TG) ENSMUSG00000017204	false
24198	TF-TG	ENSMUSG00000003949 (TF-TG) ENSMUSG00000001281	false
16002	TF-TG	ENSMUSG00000052684 (TF-TG) ENSMUSG00000016534	false
16001	TF-TG	ENSMUSG00000052684 (TF-TG) ENSMUSG00000015962	false
15996	TF-TG	ENSMUSG00000052684 (TF-TG) ENSMUSG00000015806	false
15994	TF-TG	ENSMUSG00000052684 (TF-TG) ENSMUSG00000015709	false
15988	TF-TG	ENSMUSG00000052684 (TF-TG) ENSMUSG00000015189	false
15985	TF-TG	ENSMUSG00000052684 (TF-TG) ENSMUSG00000014846	false
15984	TF-TG	ENSMUSG00000052684 (TF-TG) ENSMUSG00000014602	false
15975	TF-TG	ENSMUSG00000052684 (TF-TG) ENSMUSG00000013523	false
15965	TF-TG	ENSMUSG00000052684 (TF-TG) ENSMUSG00000010830	false
15963	TF-TG	ENSMUSG00000052684 (TF-TG) ENSMUSG00000010505	false
15958	TF-TG	ENSMUSG00000052684 (TF-TG) ENSMUSG00000009863	false
15956	TF-TG	ENSMUSG00000052684 (TF-TG) ENSMUSG00000009614	false
15955	TF-TG	ENSMUSG00000052684 (TF-TG) ENSMUSG00000009246	false
15954	TF-TG	ENSMUSG00000052684 (TF-TG) ENSMUSG00000008734	false
15953	TF-TG	ENSMUSG00000052684 (TF-TG) ENSMUSG00000008540	false
15952	TF-TG	ENSMUSG00000052684 (TF-TG) ENSMUSG00000008461	false
15951	TF-TG	ENSMUSG00000052684 (TF-TG) ENSMUSG00000007989	false
15947	TF-TG	ENSMUSG00000052684 (TF-TG) ENSMUSG00000006777	false
15943	TF-TG	ENSMUSG00000052684 (TF-TG) ENSMUSG00000006575	false
15939	TF-TG	ENSMUSG00000052684 (TF-TG) ENSMUSG00000006435	false
15938	TF-TG	ENSMUSG00000052684 (TF-TG) ENSMUSG00000006369	false
15937	TF-TG	ENSMUSG00000052684 (TF-TG) ENSMUSG00000006345	false
15936	TF-TG	ENSMUSG00000052684 (TF-TG) ENSMUSG00000005986	false
15934	TF-TG	ENSMUSG00000052684 (TF-TG) ENSMUSG00000005973	false
15933	TF-TG	ENSMUSG00000052684 (TF-TG) ENSMUSG00000005958	false
15925	TF-TG	ENSMUSG00000052684 (TF-TG) ENSMUSG00000005360	false
15924	TF-TG	ENSMUSG00000052684 (TF-TG) ENSMUSG00000005355	false
15922	TF-TG	ENSMUSG00000052684 (TF-TG) ENSMUSG00000005268	false
15921	TF-TG	ENSMUSG00000052684 (TF-TG) ENSMUSG00000005267	false
15916	TF-TG	ENSMUSG00000052684 (TF-TG) ENSMUSG00000004768	false
15914	TF-TG	ENSMUSG00000052684 (TF-TG) ENSMUSG00000004558	false
15911	TF-TG	ENSMUSG00000052684 (TF-TG) ENSMUSG00000004151	false
15908	TF-TG	ENSMUSG00000052684 (TF-TG) ENSMUSG00000003949	false
15901	TF-TG	ENSMUSG00000052684 (TF-TG) ENSMUSG00000003380	false
15900	TF-TG	ENSMUSG00000052684 (TF-TG) ENSMUSG00000003352	false
15894	TF-TG	ENSMUSG00000052684 (TF-TG) ENSMUSG00000002565	false
15890	TF-TG	ENSMUSG00000052684 (TF-TG) ENSMUSG00000001864	false
15889	TF-TG	ENSMUSG00000052684 (TF-TG) ENSMUSG00000001819	false
15888	TF-TG	ENSMUSG00000052684 (TF-TG) ENSMUSG00000001761	false
15880	TF-TG	ENSMUSG00000052684 (TF-TG) ENSMUSG00000001281	false
15879	TF-TG	ENSMUSG00000052684 (TF-TG) ENSMUSG00000001225	false
15878	TF-TG	ENSMUSG00000052684 (TF-TG) ENSMUSG00000001128	false
15877	TF-TG	ENSMUSG00000052684 (TF-TG) ENSMUSG00000001120	false
15876	TF-TG	ENSMUSG00000052684 (TF-TG) ENSMUSG00000001095	false
15875	TF-TG	ENSMUSG00000052684 (TF-TG) ENSMUSG00000001023	false
15870	TF-TG	ENSMUSG00000052684 (TF-TG) ENSMUSG00000000567	false
15867	TF-TG	ENSMUSG00000052684 (TF-TG) ENSMUSG00000000214	false
15859	TF-TG	ENSMUSG00000052684 (TF-TG) ENSMUSG00000053007	false
24003	TF-lincRNA	ENSMUSG00000000567 (TF-lincRNA) ENSMUSG00000102123	false
24000	TF-lincRNA	ENSMUSG00000000567 (TF-lincRNA) ENSMUSG00000110697	false
23998	TF-lincRNA	ENSMUSG00000000567 (TF-lincRNA) ENSMUSG00000108961	false
23995	TF-lincRNA	ENSMUSG00000000567 (TF-lincRNA) ENSMUSG00000097797	false
23990	TF-lincRNA	ENSMUSG00000000567 (TF-lincRNA) ENSMUSG00000085126	false
23977	TF-TG	ENSMUSG00000000567 (TF-TG) ENSMUSG00000098132	false
23976	TF-TG	ENSMUSG00000000567 (TF-TG) ENSMUSG00000096847	false
23971	TF-TG	ENSMUSG00000000567 (TF-TG) ENSMUSG00000094626	false
23968	TF-TG	ENSMUSG00000000567 (TF-TG) ENSMUSG00000091243	false
23967	TF-TG	ENSMUSG00000000567 (TF-TG) ENSMUSG00000090291	false
23964	TF-TG	ENSMUSG00000000567 (TF-TG) ENSMUSG00000079497	false
23961	TF-TG	ENSMUSG00000000567 (TF-TG) ENSMUSG00000079018	false
23956	TF-TG	ENSMUSG00000000567 (TF-TG) ENSMUSG00000078202	false
23953	TF-TG	ENSMUSG00000000567 (TF-TG) ENSMUSG00000075122	false
23952	TF-TG	ENSMUSG00000000567 (TF-TG) ENSMUSG00000075012	false
23940	TF-TG	ENSMUSG00000000567 (TF-TG) ENSMUSG00000072214	false
23935	TF-TG	ENSMUSG00000000567 (TF-TG) ENSMUSG00000071506	false
23933	TF-TG	ENSMUSG00000000567 (TF-TG) ENSMUSG00000070867	false
23931	TF-TG	ENSMUSG00000000567 (TF-TG) ENSMUSG00000070733	false
23922	TF-TG	ENSMUSG00000000567 (TF-TG) ENSMUSG00000068735	false
23920	TF-TG	ENSMUSG00000000567 (TF-TG) ENSMUSG00000068617	false
23918	TF-TG	ENSMUSG00000000567 (TF-TG) ENSMUSG00000068196	false
23916	TF-TG	ENSMUSG00000000567 (TF-TG) ENSMUSG00000067279	false
23910	TF-TG	ENSMUSG00000000567 (TF-TG) ENSMUSG00000064247	false
23909	TF-TG	ENSMUSG00000000567 (TF-TG) ENSMUSG00000064246	false
11618	TF-TG	ENSMUSG00000058756 (TF-TG) ENSMUSG00000061397	false
23902	TF-TG	ENSMUSG00000000567 (TF-TG) ENSMUSG00000063524	false
23900	TF-TG	ENSMUSG00000000567 (TF-TG) ENSMUSG00000062908	false
11612	TF-TG	ENSMUSG00000058756 (TF-TG) ENSMUSG00000053279	false
23899	TF-TG	ENSMUSG00000000567 (TF-TG) ENSMUSG00000062683	false
11610	TF-TG	ENSMUSG00000058756 (TF-TG) ENSMUSG00000048373	false
11607	TF-TG	ENSMUSG00000058756 (TF-TG) ENSMUSG00000039270	false
11604	TF-TG	ENSMUSG00000058756 (TF-TG) ENSMUSG00000037348	false
23891	TF-TG	ENSMUSG00000000567 (TF-TG) ENSMUSG00000061397	false
11603	TF-TG	ENSMUSG00000058756 (TF-TG) ENSMUSG00000033900	false
23889	TF-TG	ENSMUSG00000000567 (TF-TG) ENSMUSG00000060733	false
23887	TF-TG	ENSMUSG00000000567 (TF-TG) ENSMUSG00000060397	false
11598	TF-TG	ENSMUSG00000058756 (TF-TG) ENSMUSG00000029380	false
23884	TF-TG	ENSMUSG00000000567 (TF-TG) ENSMUSG00000059991	false
23881	TF-TG	ENSMUSG00000000567 (TF-TG) ENSMUSG00000059743	false
11593	TF-TG	ENSMUSG00000058756 (TF-TG) ENSMUSG00000027447	false
27976	TF-TG	ENSMUSG00000004151 (TF-TG) ENSMUSG00000020660	false
11591	TF-TG	ENSMUSG00000058756 (TF-TG) ENSMUSG00000027187	false
27975	TF-TG	ENSMUSG00000004151 (TF-TG) ENSMUSG00000000214	false
23877	TF-TG	ENSMUSG00000000567 (TF-TG) ENSMUSG00000059401	false
23875	TF-TG	ENSMUSG00000000567 (TF-TG) ENSMUSG00000058975	false
23873	TF-TG	ENSMUSG00000000567 (TF-TG) ENSMUSG00000058454	false
23872	TF-TG	ENSMUSG00000000567 (TF-TG) ENSMUSG00000058290	false
27967	TF-lincRNA	ENSMUSG00000038255 (TF-lincRNA) ENSMUSG00000097797	false
23870	TF-TG	ENSMUSG00000000567 (TF-TG) ENSMUSG00000058070	false
23869	TF-TG	ENSMUSG00000000567 (TF-TG) ENSMUSG00000057719	false
23865	TF-TG	ENSMUSG00000000567 (TF-TG) ENSMUSG00000056895	false
23864	TF-TG	ENSMUSG00000000567 (TF-TG) ENSMUSG00000056832	false
11576	TF-TG	ENSMUSG00000058756 (TF-TG) ENSMUSG00000017204	false
11575	TF-TG	ENSMUSG00000058756 (TF-TG) ENSMUSG00000006777	false
11573	TF-TG	ENSMUSG00000058756 (TF-TG) ENSMUSG00000003352	false
27955	TF-TG	ENSMUSG00000038255 (TF-TG) ENSMUSG00000096847	false
23859	TF-TG	ENSMUSG00000000567 (TF-TG) ENSMUSG00000056185	false
27954	TF-TG	ENSMUSG00000038255 (TF-TG) ENSMUSG00000094626	false
23857	TF-TG	ENSMUSG00000000567 (TF-TG) ENSMUSG00000055980	false
27952	TF-TG	ENSMUSG00000038255 (TF-TG) ENSMUSG00000092083	false
27950	TF-TG	ENSMUSG00000038255 (TF-TG) ENSMUSG00000091243	false
23853	TF-TG	ENSMUSG00000000567 (TF-TG) ENSMUSG00000055745	false
23851	TF-TG	ENSMUSG00000000567 (TF-TG) ENSMUSG00000055150	false
23847	TF-TG	ENSMUSG00000000567 (TF-TG) ENSMUSG00000054793	false
27942	TF-TG	ENSMUSG00000038255 (TF-TG) ENSMUSG00000078695	false
23846	TF-TG	ENSMUSG00000000567 (TF-TG) ENSMUSG00000054764	false
27941	TF-TG	ENSMUSG00000038255 (TF-TG) ENSMUSG00000078202	false
23844	TF-TG	ENSMUSG00000000567 (TF-TG) ENSMUSG00000054582	false
27938	TF-TG	ENSMUSG00000038255 (TF-TG) ENSMUSG00000074628	false
27936	TF-TG	ENSMUSG00000038255 (TF-TG) ENSMUSG00000074207	false
23839	TF-TG	ENSMUSG00000000567 (TF-TG) ENSMUSG00000053783	false
23838	TF-TG	ENSMUSG00000000567 (TF-TG) ENSMUSG00000053768	false
27933	TF-TG	ENSMUSG00000038255 (TF-TG) ENSMUSG00000073481	false
27931	TF-TG	ENSMUSG00000038255 (TF-TG) ENSMUSG00000072235	false
27930	TF-TG	ENSMUSG00000038255 (TF-TG) ENSMUSG00000071506	false
23831	TF-TG	ENSMUSG00000000567 (TF-TG) ENSMUSG00000053317	false
23826	TF-TG	ENSMUSG00000000567 (TF-TG) ENSMUSG00000053007	false
23825	TF-TG	ENSMUSG00000000567 (TF-TG) ENSMUSG00000052921	false
27918	TF-TG	ENSMUSG00000038255 (TF-TG) ENSMUSG00000068735	false
23822	TF-TG	ENSMUSG00000000567 (TF-TG) ENSMUSG00000052135	false
27917	TF-TG	ENSMUSG00000038255 (TF-TG) ENSMUSG00000068323	false
27916	TF-TG	ENSMUSG00000038255 (TF-TG) ENSMUSG00000068196	false
23820	TF-TG	ENSMUSG00000000567 (TF-TG) ENSMUSG00000052087	false
23819	TF-TG	ENSMUSG00000000567 (TF-TG) ENSMUSG00000051980	false
27914	TF-TG	ENSMUSG00000038255 (TF-TG) ENSMUSG00000067279	false
23818	TF-TG	ENSMUSG00000000567 (TF-TG) ENSMUSG00000051977	false
27912	TF-TG	ENSMUSG00000038255 (TF-TG) ENSMUSG00000066191	false
23813	TF-TG	ENSMUSG00000000567 (TF-TG) ENSMUSG00000050953	false
27908	TF-TG	ENSMUSG00000038255 (TF-TG) ENSMUSG00000064272	false
27906	TF-TG	ENSMUSG00000038255 (TF-TG) ENSMUSG00000064247	false
23808	TF-TG	ENSMUSG00000000567 (TF-TG) ENSMUSG00000050335	false
23807	TF-TG	ENSMUSG00000000567 (TF-TG) ENSMUSG00000050323	false
27894	TF-TG	ENSMUSG00000038255 (TF-TG) ENSMUSG00000060397	false
27892	TF-TG	ENSMUSG00000038255 (TF-TG) ENSMUSG00000059895	false
27891	TF-TG	ENSMUSG00000038255 (TF-TG) ENSMUSG00000059743	false
23794	TF-TG	ENSMUSG00000000567 (TF-TG) ENSMUSG00000049288	false
27888	TF-TG	ENSMUSG00000038255 (TF-TG) ENSMUSG00000059401	false
23791	TF-TG	ENSMUSG00000000567 (TF-TG) ENSMUSG00000048970	false
27886	TF-TG	ENSMUSG00000038255 (TF-TG) ENSMUSG00000058975	false
23790	TF-TG	ENSMUSG00000000567 (TF-TG) ENSMUSG00000048965	false
27885	TF-TG	ENSMUSG00000038255 (TF-TG) ENSMUSG00000058952	false
27884	TF-TG	ENSMUSG00000038255 (TF-TG) ENSMUSG00000058756	false
27883	TF-TG	ENSMUSG00000038255 (TF-TG) ENSMUSG00000058624	false
27882	TF-TG	ENSMUSG00000038255 (TF-TG) ENSMUSG00000058586	false
27879	TF-TG	ENSMUSG00000038255 (TF-TG) ENSMUSG00000058070	false
23783	TF-TG	ENSMUSG00000000567 (TF-TG) ENSMUSG00000048349	false
27874	TF-TG	ENSMUSG00000038255 (TF-TG) ENSMUSG00000056895	false
23776	TF-TG	ENSMUSG00000000567 (TF-TG) ENSMUSG00000047747	false
27869	TF-TG	ENSMUSG00000038255 (TF-TG) ENSMUSG00000056185	false
23772	TF-TG	ENSMUSG00000000567 (TF-TG) ENSMUSG00000047205	false
27867	TF-TG	ENSMUSG00000038255 (TF-TG) ENSMUSG00000055980	false
27863	TF-TG	ENSMUSG00000038255 (TF-TG) ENSMUSG00000055567	false
23767	TF-TG	ENSMUSG00000000567 (TF-TG) ENSMUSG00000046668	false
23766	TF-TG	ENSMUSG00000000567 (TF-TG) ENSMUSG00000046591	false
27861	TF-TG	ENSMUSG00000038255 (TF-TG) ENSMUSG00000055485	false
27857	TF-TG	ENSMUSG00000038255 (TF-TG) ENSMUSG00000054764	false
23760	TF-TG	ENSMUSG00000000567 (TF-TG) ENSMUSG00000046215	false
27854	TF-TG	ENSMUSG00000038255 (TF-TG) ENSMUSG00000054469	false
23756	TF-TG	ENSMUSG00000000567 (TF-TG) ENSMUSG00000045896	false
27851	TF-TG	ENSMUSG00000038255 (TF-TG) ENSMUSG00000053768	false
23755	TF-TG	ENSMUSG00000000567 (TF-TG) ENSMUSG00000045790	false
23750	TF-TG	ENSMUSG00000000567 (TF-TG) ENSMUSG00000045294	false
27845	TF-TG	ENSMUSG00000038255 (TF-TG) ENSMUSG00000053007	false
23749	TF-TG	ENSMUSG00000000567 (TF-TG) ENSMUSG00000045215	false
27842	TF-TG	ENSMUSG00000038255 (TF-TG) ENSMUSG00000052135	false
27841	TF-TG	ENSMUSG00000038255 (TF-TG) ENSMUSG00000051977	false
23743	TF-TG	ENSMUSG00000000567 (TF-TG) ENSMUSG00000044548	false
27838	TF-TG	ENSMUSG00000038255 (TF-TG) ENSMUSG00000051726	false
27836	TF-TG	ENSMUSG00000038255 (TF-TG) ENSMUSG00000051166	false
27833	TF-TG	ENSMUSG00000038255 (TF-TG) ENSMUSG00000050751	false
27831	TF-TG	ENSMUSG00000038255 (TF-TG) ENSMUSG00000050335	false
23732	TF-TG	ENSMUSG00000000567 (TF-TG) ENSMUSG00000043154	false
27826	TF-TG	ENSMUSG00000038255 (TF-TG) ENSMUSG00000049892	false
23730	TF-TG	ENSMUSG00000000567 (TF-TG) ENSMUSG00000042763	false
23729	TF-TG	ENSMUSG00000000567 (TF-TG) ENSMUSG00000042734	false
27822	TF-TG	ENSMUSG00000038255 (TF-TG) ENSMUSG00000049313	false
23726	TF-TG	ENSMUSG00000000567 (TF-TG) ENSMUSG00000042564	false
27821	TF-TG	ENSMUSG00000038255 (TF-TG) ENSMUSG00000049288	false
23725	TF-TG	ENSMUSG00000000567 (TF-TG) ENSMUSG00000042429	false
23724	TF-TG	ENSMUSG00000000567 (TF-TG) ENSMUSG00000042359	false
23722	TF-TG	ENSMUSG00000000567 (TF-TG) ENSMUSG00000042306	false
27817	TF-TG	ENSMUSG00000038255 (TF-TG) ENSMUSG00000048965	false
27815	TF-TG	ENSMUSG00000038255 (TF-TG) ENSMUSG00000048349	false
27814	TF-TG	ENSMUSG00000038255 (TF-TG) ENSMUSG00000048148	false
27813	TF-TG	ENSMUSG00000038255 (TF-TG) ENSMUSG00000048078	false
27812	TF-TG	ENSMUSG00000038255 (TF-TG) ENSMUSG00000048022	false
23716	TF-TG	ENSMUSG00000000567 (TF-TG) ENSMUSG00000042099	false
27810	TF-TG	ENSMUSG00000038255 (TF-TG) ENSMUSG00000047875	false
23711	TF-TG	ENSMUSG00000000567 (TF-TG) ENSMUSG00000041889	false
27805	TF-TG	ENSMUSG00000038255 (TF-TG) ENSMUSG00000046668	false
23708	TF-TG	ENSMUSG00000000567 (TF-TG) ENSMUSG00000041609	false
23707	TF-TG	ENSMUSG00000000567 (TF-TG) ENSMUSG00000041570	false
27801	TF-TG	ENSMUSG00000038255 (TF-TG) ENSMUSG00000046215	false
27800	TF-TG	ENSMUSG00000038255 (TF-TG) ENSMUSG00000046160	false
23702	TF-TG	ENSMUSG00000000567 (TF-TG) ENSMUSG00000041193	false
23700	TF-TG	ENSMUSG00000000567 (TF-TG) ENSMUSG00000041126	false
27795	TF-TG	ENSMUSG00000038255 (TF-TG) ENSMUSG00000045215	false
23699	TF-TG	ENSMUSG00000000567 (TF-TG) ENSMUSG00000041120	false
27794	TF-TG	ENSMUSG00000038255 (TF-TG) ENSMUSG00000044933	false
23698	TF-TG	ENSMUSG00000000567 (TF-TG) ENSMUSG00000041096	false
27789	TF-TG	ENSMUSG00000038255 (TF-TG) ENSMUSG00000044033	false
23692	TF-TG	ENSMUSG00000000567 (TF-TG) ENSMUSG00000040972	false
27786	TF-TG	ENSMUSG00000038255 (TF-TG) ENSMUSG00000043461	false
23689	TF-TG	ENSMUSG00000000567 (TF-TG) ENSMUSG00000040663	false
23687	TF-TG	ENSMUSG00000000567 (TF-TG) ENSMUSG00000040495	false
27782	TF-TG	ENSMUSG00000038255 (TF-TG) ENSMUSG00000042763	false
27781	TF-TG	ENSMUSG00000038255 (TF-TG) ENSMUSG00000042734	false
27779	TF-TG	ENSMUSG00000038255 (TF-TG) ENSMUSG00000042631	false
27776	TF-TG	ENSMUSG00000038255 (TF-TG) ENSMUSG00000042501	false
27775	TF-TG	ENSMUSG00000038255 (TF-TG) ENSMUSG00000042429	false
23679	TF-TG	ENSMUSG00000000567 (TF-TG) ENSMUSG00000040276	false
27773	TF-TG	ENSMUSG00000038255 (TF-TG) ENSMUSG00000042251	false
23677	TF-TG	ENSMUSG00000000567 (TF-TG) ENSMUSG00000040209	false
23676	TF-TG	ENSMUSG00000000567 (TF-TG) ENSMUSG00000040170	false
27771	TF-TG	ENSMUSG00000038255 (TF-TG) ENSMUSG00000042099	false
23673	TF-TG	ENSMUSG00000000567 (TF-TG) ENSMUSG00000039814	false
23671	TF-TG	ENSMUSG00000000567 (TF-TG) ENSMUSG00000039809	false
27766	TF-TG	ENSMUSG00000038255 (TF-TG) ENSMUSG00000041729	false
23670	TF-TG	ENSMUSG00000000567 (TF-TG) ENSMUSG00000039740	false
27765	TF-TG	ENSMUSG00000038255 (TF-TG) ENSMUSG00000041420	false
27763	TF-TG	ENSMUSG00000038255 (TF-TG) ENSMUSG00000041126	false
23667	TF-TG	ENSMUSG00000000567 (TF-TG) ENSMUSG00000039396	false
27762	TF-TG	ENSMUSG00000038255 (TF-TG) ENSMUSG00000041096	false
23666	TF-TG	ENSMUSG00000000567 (TF-TG) ENSMUSG00000039304	false
23665	TF-TG	ENSMUSG00000000567 (TF-TG) ENSMUSG00000039270	false
27760	TF-TG	ENSMUSG00000038255 (TF-TG) ENSMUSG00000041000	false
23664	TF-TG	ENSMUSG00000000567 (TF-TG) ENSMUSG00000039168	false
27758	TF-TG	ENSMUSG00000038255 (TF-TG) ENSMUSG00000040972	false
27756	TF-TG	ENSMUSG00000038255 (TF-TG) ENSMUSG00000040624	false
23660	TF-TG	ENSMUSG00000000567 (TF-TG) ENSMUSG00000039059	false
23657	TF-TG	ENSMUSG00000000567 (TF-TG) ENSMUSG00000039004	false
23656	TF-TG	ENSMUSG00000000567 (TF-TG) ENSMUSG00000038984	false
27750	TF-TG	ENSMUSG00000038255 (TF-TG) ENSMUSG00000040209	false
27749	TF-TG	ENSMUSG00000038255 (TF-TG) ENSMUSG00000040170	false
27748	TF-TG	ENSMUSG00000038255 (TF-TG) ENSMUSG00000040136	false
23652	TF-TG	ENSMUSG00000000567 (TF-TG) ENSMUSG00000038644	false
27744	TF-TG	ENSMUSG00000038255 (TF-TG) ENSMUSG00000039958	false
23648	TF-TG	ENSMUSG00000000567 (TF-TG) ENSMUSG00000038456	false
27741	TF-TG	ENSMUSG00000038255 (TF-TG) ENSMUSG00000039713	false
27739	TF-TG	ENSMUSG00000038255 (TF-TG) ENSMUSG00000039384	false
23643	TF-TG	ENSMUSG00000000567 (TF-TG) ENSMUSG00000038319	false
27738	TF-TG	ENSMUSG00000038255 (TF-TG) ENSMUSG00000039372	false
27737	TF-TG	ENSMUSG00000038255 (TF-TG) ENSMUSG00000039270	false
27736	TF-TG	ENSMUSG00000038255 (TF-TG) ENSMUSG00000039168	false
23636	TF-TG	ENSMUSG00000000567 (TF-TG) ENSMUSG00000037855	false
27731	TF-TG	ENSMUSG00000038255 (TF-TG) ENSMUSG00000039005	false
23632	TF-TG	ENSMUSG00000000567 (TF-TG) ENSMUSG00000037712	false
27727	TF-TG	ENSMUSG00000038255 (TF-TG) ENSMUSG00000038740	false
23631	TF-TG	ENSMUSG00000000567 (TF-TG) ENSMUSG00000037686	false
27724	TF-TG	ENSMUSG00000038255 (TF-TG) ENSMUSG00000038580	false
23628	TF-TG	ENSMUSG00000000567 (TF-TG) ENSMUSG00000037628	false
27721	TF-TG	ENSMUSG00000038255 (TF-TG) ENSMUSG00000038456	false
27716	TF-TG	ENSMUSG00000038255 (TF-TG) ENSMUSG00000038319	false
23620	TF-TG	ENSMUSG00000000567 (TF-TG) ENSMUSG00000037440	false
27711	TF-TG	ENSMUSG00000038255 (TF-TG) ENSMUSG00000037905	false
23611	TF-TG	ENSMUSG00000000567 (TF-TG) ENSMUSG00000037005	false
23604	TF-TG	ENSMUSG00000000567 (TF-TG) ENSMUSG00000036832	false
27699	TF-TG	ENSMUSG00000038255 (TF-TG) ENSMUSG00000037005	false
23603	TF-TG	ENSMUSG00000000567 (TF-TG) ENSMUSG00000036745	false
23602	TF-TG	ENSMUSG00000000567 (TF-TG) ENSMUSG00000036667	false
23601	TF-TG	ENSMUSG00000000567 (TF-TG) ENSMUSG00000036599	false
27695	TF-TG	ENSMUSG00000038255 (TF-TG) ENSMUSG00000036892	false
27693	TF-TG	ENSMUSG00000038255 (TF-TG) ENSMUSG00000036745	false
27692	TF-TG	ENSMUSG00000038255 (TF-TG) ENSMUSG00000036306	false
23596	TF-TG	ENSMUSG00000000567 (TF-TG) ENSMUSG00000035849	false
27690	TF-TG	ENSMUSG00000038255 (TF-TG) ENSMUSG00000036053	false
23592	TF-TG	ENSMUSG00000000567 (TF-TG) ENSMUSG00000035506	false
23591	TF-TG	ENSMUSG00000000567 (TF-TG) ENSMUSG00000035504	false
27686	TF-TG	ENSMUSG00000038255 (TF-TG) ENSMUSG00000035431	false
23589	TF-TG	ENSMUSG00000000567 (TF-TG) ENSMUSG00000035431	false
27682	TF-TG	ENSMUSG00000038255 (TF-TG) ENSMUSG00000035273	false
23586	TF-TG	ENSMUSG00000000567 (TF-TG) ENSMUSG00000035235	false
27681	TF-TG	ENSMUSG00000038255 (TF-TG) ENSMUSG00000035181	false
23585	TF-TG	ENSMUSG00000000567 (TF-TG) ENSMUSG00000035181	false
27677	TF-TG	ENSMUSG00000038255 (TF-TG) ENSMUSG00000034825	false
23580	TF-TG	ENSMUSG00000000567 (TF-TG) ENSMUSG00000035095	false
27674	TF-TG	ENSMUSG00000038255 (TF-TG) ENSMUSG00000034724	false
27670	TF-TG	ENSMUSG00000038255 (TF-TG) ENSMUSG00000034648	false
23574	TF-TG	ENSMUSG00000000567 (TF-TG) ENSMUSG00000034573	false
27669	TF-TG	ENSMUSG00000038255 (TF-TG) ENSMUSG00000034586	false
27666	TF-TG	ENSMUSG00000038255 (TF-TG) ENSMUSG00000033900	false
23570	TF-TG	ENSMUSG00000000567 (TF-TG) ENSMUSG00000034285	false
27664	TF-TG	ENSMUSG00000038255 (TF-TG) ENSMUSG00000033717	false
23568	TF-TG	ENSMUSG00000000567 (TF-TG) ENSMUSG00000034227	false
27663	TF-TG	ENSMUSG00000038255 (TF-TG) ENSMUSG00000033705	false
23566	TF-TG	ENSMUSG00000000567 (TF-TG) ENSMUSG00000034006	false
27661	TF-TG	ENSMUSG00000038255 (TF-TG) ENSMUSG00000033579	false
23565	TF-TG	ENSMUSG00000000567 (TF-TG) ENSMUSG00000033952	false
23564	TF-TG	ENSMUSG00000000567 (TF-TG) ENSMUSG00000033900	false
23561	TF-TG	ENSMUSG00000000567 (TF-TG) ENSMUSG00000033717	false
23560	TF-TG	ENSMUSG00000000567 (TF-TG) ENSMUSG00000033705	false
27653	TF-TG	ENSMUSG00000038255 (TF-TG) ENSMUSG00000032965	false
27652	TF-TG	ENSMUSG00000038255 (TF-TG) ENSMUSG00000032883	false
27648	TF-TG	ENSMUSG00000038255 (TF-TG) ENSMUSG00000032666	false
27645	TF-TG	ENSMUSG00000038255 (TF-TG) ENSMUSG00000032531	false
27644	TF-TG	ENSMUSG00000038255 (TF-TG) ENSMUSG00000032356	false
27643	TF-TG	ENSMUSG00000038255 (TF-TG) ENSMUSG00000032338	false
23546	TF-TG	ENSMUSG00000000567 (TF-TG) ENSMUSG00000032965	false
23545	TF-TG	ENSMUSG00000000567 (TF-TG) ENSMUSG00000032883	false
23537	TF-TG	ENSMUSG00000000567 (TF-TG) ENSMUSG00000032666	false
27632	TF-TG	ENSMUSG00000038255 (TF-TG) ENSMUSG00000031790	false
27630	TF-TG	ENSMUSG00000038255 (TF-TG) ENSMUSG00000031785	false
23534	TF-TG	ENSMUSG00000000567 (TF-TG) ENSMUSG00000032531	false
27627	TF-TG	ENSMUSG00000038255 (TF-TG) ENSMUSG00000031626	false
27626	TF-TG	ENSMUSG00000038255 (TF-TG) ENSMUSG00000031562	false
27625	TF-TG	ENSMUSG00000038255 (TF-TG) ENSMUSG00000031558	false
23529	TF-TG	ENSMUSG00000000567 (TF-TG) ENSMUSG00000032373	false
23528	TF-TG	ENSMUSG00000000567 (TF-TG) ENSMUSG00000032358	false
27623	TF-TG	ENSMUSG00000038255 (TF-TG) ENSMUSG00000031448	false
23527	TF-TG	ENSMUSG00000000567 (TF-TG) ENSMUSG00000032356	false
23526	TF-TG	ENSMUSG00000000567 (TF-TG) ENSMUSG00000032338	false
27621	TF-TG	ENSMUSG00000038255 (TF-TG) ENSMUSG00000031353	false
27620	TF-TG	ENSMUSG00000038255 (TF-TG) ENSMUSG00000031351	false
23521	TF-TG	ENSMUSG00000000567 (TF-TG) ENSMUSG00000032202	false
23512	TF-TG	ENSMUSG00000000567 (TF-TG) ENSMUSG00000031790	false
27607	TF-TG	ENSMUSG00000038255 (TF-TG) ENSMUSG00000030110	false
27606	TF-TG	ENSMUSG00000038255 (TF-TG) ENSMUSG00000030107	false
27602	TF-TG	ENSMUSG00000038255 (TF-TG) ENSMUSG00000029762	false
23506	TF-TG	ENSMUSG00000000567 (TF-TG) ENSMUSG00000031626	false
23504	TF-TG	ENSMUSG00000000567 (TF-TG) ENSMUSG00000031586	false
27599	TF-TG	ENSMUSG00000038255 (TF-TG) ENSMUSG00000029436	false
23503	TF-TG	ENSMUSG00000000567 (TF-TG) ENSMUSG00000031562	false
27597	TF-TG	ENSMUSG00000038255 (TF-TG) ENSMUSG00000029245	false
27595	TF-TG	ENSMUSG00000038255 (TF-TG) ENSMUSG00000029153	false
27593	TF-TG	ENSMUSG00000038255 (TF-TG) ENSMUSG00000029121	false
23496	TF-TG	ENSMUSG00000000567 (TF-TG) ENSMUSG00000031353	false
27591	TF-TG	ENSMUSG00000038255 (TF-TG) ENSMUSG00000029059	false
27590	TF-TG	ENSMUSG00000038255 (TF-TG) ENSMUSG00000028986	false
27587	TF-TG	ENSMUSG00000038255 (TF-TG) ENSMUSG00000028763	false
23484	TF-TG	ENSMUSG00000000567 (TF-TG) ENSMUSG00000030659	false
27578	TF-TG	ENSMUSG00000038255 (TF-TG) ENSMUSG00000028289	false
23481	TF-TG	ENSMUSG00000000567 (TF-TG) ENSMUSG00000030510	false
23478	TF-TG	ENSMUSG00000000567 (TF-TG) ENSMUSG00000030137	false
23477	TF-TG	ENSMUSG00000000567 (TF-TG) ENSMUSG00000030110	false
23476	TF-TG	ENSMUSG00000000567 (TF-TG) ENSMUSG00000030107	false
23475	TF-TG	ENSMUSG00000000567 (TF-TG) ENSMUSG00000030087	false
27570	TF-TG	ENSMUSG00000038255 (TF-TG) ENSMUSG00000027698	false
27568	TF-TG	ENSMUSG00000038255 (TF-TG) ENSMUSG00000027438	false
23472	TF-TG	ENSMUSG00000000567 (TF-TG) ENSMUSG00000029910	false
27566	TF-TG	ENSMUSG00000038255 (TF-TG) ENSMUSG00000027075	false
27561	TF-TG	ENSMUSG00000038255 (TF-TG) ENSMUSG00000026848	false
27558	TF-TG	ENSMUSG00000038255 (TF-TG) ENSMUSG00000026692	false
27554	TF-TG	ENSMUSG00000038255 (TF-TG) ENSMUSG00000026504	false
23458	TF-TG	ENSMUSG00000000567 (TF-TG) ENSMUSG00000029168	false
23455	TF-TG	ENSMUSG00000000567 (TF-TG) ENSMUSG00000029153	false
27549	TF-TG	ENSMUSG00000038255 (TF-TG) ENSMUSG00000026442	false
23452	TF-TG	ENSMUSG00000000567 (TF-TG) ENSMUSG00000029059	false
27547	TF-TG	ENSMUSG00000038255 (TF-TG) ENSMUSG00000026247	false
23450	TF-TG	ENSMUSG00000000567 (TF-TG) ENSMUSG00000028940	false
23448	TF-TG	ENSMUSG00000000567 (TF-TG) ENSMUSG00000028763	false
23447	TF-TG	ENSMUSG00000000567 (TF-TG) ENSMUSG00000028749	false
23445	TF-TG	ENSMUSG00000000567 (TF-TG) ENSMUSG00000028716	false
27540	TF-TG	ENSMUSG00000038255 (TF-TG) ENSMUSG00000025876	false
27535	TF-TG	ENSMUSG00000038255 (TF-TG) ENSMUSG00000025576	false
27532	TF-TG	ENSMUSG00000038255 (TF-TG) ENSMUSG00000025410	false
27531	TF-TG	ENSMUSG00000038255 (TF-TG) ENSMUSG00000025351	false
27529	TF-TG	ENSMUSG00000038255 (TF-TG) ENSMUSG00000025207	false
23432	TF-TG	ENSMUSG00000000567 (TF-TG) ENSMUSG00000028435	false
23430	TF-TG	ENSMUSG00000000567 (TF-TG) ENSMUSG00000028312	false
27525	TF-TG	ENSMUSG00000038255 (TF-TG) ENSMUSG00000025089	false
23429	TF-TG	ENSMUSG00000000567 (TF-TG) ENSMUSG00000028289	false
27524	TF-TG	ENSMUSG00000038255 (TF-TG) ENSMUSG00000025081	false
27521	TF-TG	ENSMUSG00000038255 (TF-TG) ENSMUSG00000024978	false
27519	TF-TG	ENSMUSG00000038255 (TF-TG) ENSMUSG00000024897	false
27515	TF-TG	ENSMUSG00000038255 (TF-TG) ENSMUSG00000024664	false
27512	TF-TG	ENSMUSG00000038255 (TF-TG) ENSMUSG00000024548	false
27511	TF-TG	ENSMUSG00000038255 (TF-TG) ENSMUSG00000024533	false
23415	TF-TG	ENSMUSG00000000567 (TF-TG) ENSMUSG00000027715	false
27510	TF-TG	ENSMUSG00000038255 (TF-TG) ENSMUSG00000024411	false
23414	TF-TG	ENSMUSG00000000567 (TF-TG) ENSMUSG00000027698	false
23413	TF-TG	ENSMUSG00000000567 (TF-TG) ENSMUSG00000027661	false
23412	TF-TG	ENSMUSG00000000567 (TF-TG) ENSMUSG00000027654	false
27503	TF-TG	ENSMUSG00000038255 (TF-TG) ENSMUSG00000024175	false
23407	TF-TG	ENSMUSG00000000567 (TF-TG) ENSMUSG00000027469	false
23406	TF-TG	ENSMUSG00000000567 (TF-TG) ENSMUSG00000027420	false
27499	TF-TG	ENSMUSG00000038255 (TF-TG) ENSMUSG00000024029	false
23400	TF-TG	ENSMUSG00000000567 (TF-TG) ENSMUSG00000027187	false
23397	TF-TG	ENSMUSG00000000567 (TF-TG) ENSMUSG00000026981	false
27492	TF-TG	ENSMUSG00000038255 (TF-TG) ENSMUSG00000023800	false
27488	TF-TG	ENSMUSG00000038255 (TF-TG) ENSMUSG00000023247	false
23391	TF-TG	ENSMUSG00000000567 (TF-TG) ENSMUSG00000026848	false
27482	TF-TG	ENSMUSG00000038255 (TF-TG) ENSMUSG00000022844	false
27481	TF-TG	ENSMUSG00000038255 (TF-TG) ENSMUSG00000022817	false
27480	TF-TG	ENSMUSG00000038255 (TF-TG) ENSMUSG00000022687	false
27479	TF-TG	ENSMUSG00000038255 (TF-TG) ENSMUSG00000022652	false
27478	TF-TG	ENSMUSG00000038255 (TF-TG) ENSMUSG00000022637	false
23382	TF-TG	ENSMUSG00000000567 (TF-TG) ENSMUSG00000026504	false
23381	TF-TG	ENSMUSG00000000567 (TF-TG) ENSMUSG00000026483	false
23379	TF-TG	ENSMUSG00000000567 (TF-TG) ENSMUSG00000026442	false
23378	TF-TG	ENSMUSG00000000567 (TF-TG) ENSMUSG00000026430	false
27472	TF-TG	ENSMUSG00000038255 (TF-TG) ENSMUSG00000022456	false
27471	TF-TG	ENSMUSG00000038255 (TF-TG) ENSMUSG00000022435	false
23375	TF-TG	ENSMUSG00000000567 (TF-TG) ENSMUSG00000026247	false
27469	TF-TG	ENSMUSG00000038255 (TF-TG) ENSMUSG00000022332	false
23370	TF-TG	ENSMUSG00000000567 (TF-TG) ENSMUSG00000025991	false
27465	TF-TG	ENSMUSG00000038255 (TF-TG) ENSMUSG00000022051	false
27464	TF-TG	ENSMUSG00000038255 (TF-TG) ENSMUSG00000022033	false
27462	TF-TG	ENSMUSG00000038255 (TF-TG) ENSMUSG00000021913	false
27461	TF-TG	ENSMUSG00000038255 (TF-TG) ENSMUSG00000021700	false
23365	TF-TG	ENSMUSG00000000567 (TF-TG) ENSMUSG00000025876	false
27460	TF-TG	ENSMUSG00000038255 (TF-TG) ENSMUSG00000021685	false
27459	TF-TG	ENSMUSG00000038255 (TF-TG) ENSMUSG00000021604	false
27456	TF-TG	ENSMUSG00000038255 (TF-TG) ENSMUSG00000021337	false
23360	TF-TG	ENSMUSG00000000567 (TF-TG) ENSMUSG00000025557	false
27455	TF-TG	ENSMUSG00000038255 (TF-TG) ENSMUSG00000021303	false
27453	TF-TG	ENSMUSG00000038255 (TF-TG) ENSMUSG00000021240	false
27451	TF-TG	ENSMUSG00000038255 (TF-TG) ENSMUSG00000021194	false
23355	TF-TG	ENSMUSG00000000567 (TF-TG) ENSMUSG00000025410	false
23353	TF-TG	ENSMUSG00000000567 (TF-TG) ENSMUSG00000025351	false
27448	TF-TG	ENSMUSG00000038255 (TF-TG) ENSMUSG00000020846	false
23352	TF-TG	ENSMUSG00000000567 (TF-TG) ENSMUSG00000025227	false
27446	TF-TG	ENSMUSG00000038255 (TF-TG) ENSMUSG00000020788	false
27445	TF-TG	ENSMUSG00000038255 (TF-TG) ENSMUSG00000020766	false
23349	TF-TG	ENSMUSG00000000567 (TF-TG) ENSMUSG00000025089	false
27443	TF-TG	ENSMUSG00000038255 (TF-TG) ENSMUSG00000020732	false
27441	TF-TG	ENSMUSG00000038255 (TF-TG) ENSMUSG00000020660	false
27440	TF-TG	ENSMUSG00000038255 (TF-TG) ENSMUSG00000020599	false
23343	TF-TG	ENSMUSG00000000567 (TF-TG) ENSMUSG00000024978	false
23340	TF-TG	ENSMUSG00000000567 (TF-TG) ENSMUSG00000024899	false
27435	TF-TG	ENSMUSG00000038255 (TF-TG) ENSMUSG00000020388	false
23339	TF-TG	ENSMUSG00000000567 (TF-TG) ENSMUSG00000024897	false
27434	TF-TG	ENSMUSG00000038255 (TF-TG) ENSMUSG00000020303	false
23337	TF-TG	ENSMUSG00000000567 (TF-TG) ENSMUSG00000024810	false
27430	TF-TG	ENSMUSG00000038255 (TF-TG) ENSMUSG00000019775	false
23334	TF-TG	ENSMUSG00000000567 (TF-TG) ENSMUSG00000024738	false
23333	TF-TG	ENSMUSG00000000567 (TF-TG) ENSMUSG00000024727	false
27428	TF-TG	ENSMUSG00000038255 (TF-TG) ENSMUSG00000019647	false
23332	TF-TG	ENSMUSG00000000567 (TF-TG) ENSMUSG00000024713	false
23331	TF-TG	ENSMUSG00000000567 (TF-TG) ENSMUSG00000024659	false
27424	TF-TG	ENSMUSG00000038255 (TF-TG) ENSMUSG00000018672	false
23326	TF-TG	ENSMUSG00000000567 (TF-TG) ENSMUSG00000024548	false
23324	TF-TG	ENSMUSG00000000567 (TF-TG) ENSMUSG00000024479	false
27419	TF-TG	ENSMUSG00000038255 (TF-TG) ENSMUSG00000017943	false
23322	TF-TG	ENSMUSG00000000567 (TF-TG) ENSMUSG00000024352	false
27413	TF-TG	ENSMUSG00000038255 (TF-TG) ENSMUSG00000017204	false
23317	TF-TG	ENSMUSG00000000567 (TF-TG) ENSMUSG00000024140	false
27409	TF-TG	ENSMUSG00000038255 (TF-TG) ENSMUSG00000015806	false
23313	TF-TG	ENSMUSG00000000567 (TF-TG) ENSMUSG00000023963	false
27406	TF-TG	ENSMUSG00000038255 (TF-TG) ENSMUSG00000015568	false
27405	TF-TG	ENSMUSG00000038255 (TF-TG) ENSMUSG00000015222	false
27403	TF-TG	ENSMUSG00000038255 (TF-TG) ENSMUSG00000014846	false
23306	TF-TG	ENSMUSG00000000567 (TF-TG) ENSMUSG00000023800	false
27401	TF-TG	ENSMUSG00000038255 (TF-TG) ENSMUSG00000013523	false
23303	TF-TG	ENSMUSG00000000567 (TF-TG) ENSMUSG00000023247	false
27397	TF-TG	ENSMUSG00000038255 (TF-TG) ENSMUSG00000010830	false
27396	TF-TG	ENSMUSG00000038255 (TF-TG) ENSMUSG00000010505	false
27394	TF-TG	ENSMUSG00000038255 (TF-TG) ENSMUSG00000009863	false
23298	TF-TG	ENSMUSG00000000567 (TF-TG) ENSMUSG00000023015	false
27393	TF-TG	ENSMUSG00000038255 (TF-TG) ENSMUSG00000009614	false
27392	TF-TG	ENSMUSG00000038255 (TF-TG) ENSMUSG00000008461	false
27391	TF-TG	ENSMUSG00000038255 (TF-TG) ENSMUSG00000008090	false
27388	TF-TG	ENSMUSG00000038255 (TF-TG) ENSMUSG00000006575	false
23291	TF-TG	ENSMUSG00000000567 (TF-TG) ENSMUSG00000022844	false
27385	TF-TG	ENSMUSG00000038255 (TF-TG) ENSMUSG00000006369	false
27384	TF-TG	ENSMUSG00000038255 (TF-TG) ENSMUSG00000005973	false
23288	TF-TG	ENSMUSG00000000567 (TF-TG) ENSMUSG00000022817	false
27383	TF-TG	ENSMUSG00000038255 (TF-TG) ENSMUSG00000005958	false
23287	TF-TG	ENSMUSG00000000567 (TF-TG) ENSMUSG00000022742	false
23286	TF-TG	ENSMUSG00000000567 (TF-TG) ENSMUSG00000022652	false
27381	TF-TG	ENSMUSG00000038255 (TF-TG) ENSMUSG00000005355	false
23285	TF-TG	ENSMUSG00000000567 (TF-TG) ENSMUSG00000022637	false
27377	TF-TG	ENSMUSG00000038255 (TF-TG) ENSMUSG00000004768	false
23279	TF-TG	ENSMUSG00000000567 (TF-TG) ENSMUSG00000022519	false
27372	TF-TG	ENSMUSG00000038255 (TF-TG) ENSMUSG00000003949	false
27369	TF-TG	ENSMUSG00000038255 (TF-TG) ENSMUSG00000003436	false
27368	TF-TG	ENSMUSG00000038255 (TF-TG) ENSMUSG00000001819	false
23272	TF-TG	ENSMUSG00000000567 (TF-TG) ENSMUSG00000022219	false
23269	TF-TG	ENSMUSG00000000567 (TF-TG) ENSMUSG00000022178	false
27364	TF-TG	ENSMUSG00000038255 (TF-TG) ENSMUSG00000001225	false
27363	TF-TG	ENSMUSG00000038255 (TF-TG) ENSMUSG00000001120	false
23264	TF-TG	ENSMUSG00000000567 (TF-TG) ENSMUSG00000022051	false
23263	TF-TG	ENSMUSG00000000567 (TF-TG) ENSMUSG00000022033	false
23253	TF-TG	ENSMUSG00000000567 (TF-TG) ENSMUSG00000021604	false
23249	TF-TG	ENSMUSG00000000567 (TF-TG) ENSMUSG00000021367	false
23247	TF-TG	ENSMUSG00000000567 (TF-TG) ENSMUSG00000021240	false
23246	TF-TG	ENSMUSG00000000567 (TF-TG) ENSMUSG00000021223	false
23245	TF-TG	ENSMUSG00000000567 (TF-TG) ENSMUSG00000021203	false
23243	TF-TG	ENSMUSG00000000567 (TF-TG) ENSMUSG00000021194	false
31433	TF-lincRNA	ENSMUSG00000038692 (TF-lincRNA) ENSMUSG00000108961	false
31431	TF-lincRNA	ENSMUSG00000038692 (TF-lincRNA) ENSMUSG00000107689	false
31430	TF-lincRNA	ENSMUSG00000038692 (TF-lincRNA) ENSMUSG00000097797	false
31429	TF-lincRNA	ENSMUSG00000038692 (TF-lincRNA) ENSMUSG00000108356	false
31426	TF-lincRNA	ENSMUSG00000038692 (TF-lincRNA) ENSMUSG00000085126	false
23233	TF-TG	ENSMUSG00000000567 (TF-TG) ENSMUSG00000020846	false
31424	TF-lincRNA	ENSMUSG00000038692 (TF-lincRNA) ENSMUSG00000097281	false
31423	TF-TG	ENSMUSG00000038692 (TF-TG) ENSMUSG00000110206	false
23231	TF-TG	ENSMUSG00000000567 (TF-TG) ENSMUSG00000020747	false
23228	TF-TG	ENSMUSG00000000567 (TF-TG) ENSMUSG00000020674	false
23227	TF-TG	ENSMUSG00000000567 (TF-TG) ENSMUSG00000020668	false
23225	TF-TG	ENSMUSG00000000567 (TF-TG) ENSMUSG00000020599	false
31415	TF-TG	ENSMUSG00000038692 (TF-TG) ENSMUSG00000079038	false
23223	TF-TG	ENSMUSG00000000567 (TF-TG) ENSMUSG00000020424	false
31410	TF-TG	ENSMUSG00000038692 (TF-TG) ENSMUSG00000075122	false
31409	TF-TG	ENSMUSG00000038692 (TF-TG) ENSMUSG00000075033	false
23217	TF-TG	ENSMUSG00000000567 (TF-TG) ENSMUSG00000020303	false
31408	TF-TG	ENSMUSG00000038692 (TF-TG) ENSMUSG00000075012	false
23215	TF-TG	ENSMUSG00000000567 (TF-TG) ENSMUSG00000020121	false
31406	TF-TG	ENSMUSG00000038692 (TF-TG) ENSMUSG00000074628	false
23214	TF-TG	ENSMUSG00000000567 (TF-TG) ENSMUSG00000020105	false
31396	TF-TG	ENSMUSG00000038692 (TF-TG) ENSMUSG00000072235	false
23204	TF-TG	ENSMUSG00000000567 (TF-TG) ENSMUSG00000019817	false
23202	TF-TG	ENSMUSG00000000567 (TF-TG) ENSMUSG00000019647	false
31393	TF-TG	ENSMUSG00000038692 (TF-TG) ENSMUSG00000071506	false
31391	TF-TG	ENSMUSG00000038692 (TF-TG) ENSMUSG00000070733	false
31388	TF-TG	ENSMUSG00000038692 (TF-TG) ENSMUSG00000068874	false
23195	TF-TG	ENSMUSG00000000567 (TF-TG) ENSMUSG00000018774	false
31386	TF-TG	ENSMUSG00000038692 (TF-TG) ENSMUSG00000064272	false
31384	TF-TG	ENSMUSG00000038692 (TF-TG) ENSMUSG00000064247	false
23191	TF-TG	ENSMUSG00000000567 (TF-TG) ENSMUSG00000018340	false
31378	TF-TG	ENSMUSG00000038692 (TF-TG) ENSMUSG00000062683	false
31374	TF-TG	ENSMUSG00000038692 (TF-TG) ENSMUSG00000060397	false
23182	TF-TG	ENSMUSG00000000567 (TF-TG) ENSMUSG00000017204	false
31373	TF-TG	ENSMUSG00000038692 (TF-TG) ENSMUSG00000060002	false
31371	TF-TG	ENSMUSG00000038692 (TF-TG) ENSMUSG00000059743	false
31366	TF-TG	ENSMUSG00000038692 (TF-TG) ENSMUSG00000059060	false
31364	TF-TG	ENSMUSG00000038692 (TF-TG) ENSMUSG00000058975	false
31363	TF-TG	ENSMUSG00000038692 (TF-TG) ENSMUSG00000058952	false
23171	TF-TG	ENSMUSG00000000567 (TF-TG) ENSMUSG00000015806	false
31361	TF-TG	ENSMUSG00000038692 (TF-TG) ENSMUSG00000058756	false
31360	TF-TG	ENSMUSG00000038692 (TF-TG) ENSMUSG00000058586	false
31359	TF-TG	ENSMUSG00000038692 (TF-TG) ENSMUSG00000058454	false
31358	TF-TG	ENSMUSG00000038692 (TF-TG) ENSMUSG00000058290	false
31357	TF-TG	ENSMUSG00000038692 (TF-TG) ENSMUSG00000058070	false
23165	TF-TG	ENSMUSG00000000567 (TF-TG) ENSMUSG00000014602	false
31355	TF-TG	ENSMUSG00000038692 (TF-TG) ENSMUSG00000056895	false
31349	TF-TG	ENSMUSG00000038692 (TF-TG) ENSMUSG00000056185	false
31348	TF-TG	ENSMUSG00000038692 (TF-TG) ENSMUSG00000055980	false
31347	TF-TG	ENSMUSG00000038692 (TF-TG) ENSMUSG00000055978	false
23155	TF-TG	ENSMUSG00000000567 (TF-TG) ENSMUSG00000010830	false
23153	TF-TG	ENSMUSG00000000567 (TF-TG) ENSMUSG00000009863	false
31344	TF-TG	ENSMUSG00000038692 (TF-TG) ENSMUSG00000055485	false
23151	TF-TG	ENSMUSG00000000567 (TF-TG) ENSMUSG00000008734	false
23150	TF-TG	ENSMUSG00000000567 (TF-TG) ENSMUSG00000008090	false
23149	TF-TG	ENSMUSG00000000567 (TF-TG) ENSMUSG00000007989	false
31339	TF-TG	ENSMUSG00000038692 (TF-TG) ENSMUSG00000054582	false
23142	TF-TG	ENSMUSG00000000567 (TF-TG) ENSMUSG00000006435	false
31333	TF-TG	ENSMUSG00000038692 (TF-TG) ENSMUSG00000053768	false
23141	TF-TG	ENSMUSG00000000567 (TF-TG) ENSMUSG00000006345	false
23140	TF-TG	ENSMUSG00000000567 (TF-TG) ENSMUSG00000005986	false
23139	TF-TG	ENSMUSG00000000567 (TF-TG) ENSMUSG00000005973	false
23138	TF-TG	ENSMUSG00000000567 (TF-TG) ENSMUSG00000005958	false
31327	TF-TG	ENSMUSG00000038692 (TF-TG) ENSMUSG00000052609	false
23134	TF-TG	ENSMUSG00000000567 (TF-TG) ENSMUSG00000005360	false
31324	TF-TG	ENSMUSG00000038692 (TF-TG) ENSMUSG00000052087	false
23128	TF-TG	ENSMUSG00000000567 (TF-TG) ENSMUSG00000004768	false
31317	TF-TG	ENSMUSG00000038692 (TF-TG) ENSMUSG00000050953	false
23124	TF-TG	ENSMUSG00000000567 (TF-TG) ENSMUSG00000003949	false
23119	TF-TG	ENSMUSG00000000567 (TF-TG) ENSMUSG00000003380	false
31310	TF-TG	ENSMUSG00000038692 (TF-TG) ENSMUSG00000050335	false
31309	TF-TG	ENSMUSG00000038692 (TF-TG) ENSMUSG00000050323	false
23115	TF-TG	ENSMUSG00000000567 (TF-TG) ENSMUSG00000002565	false
23114	TF-TG	ENSMUSG00000000567 (TF-TG) ENSMUSG00000001864	false
31305	TF-TG	ENSMUSG00000038692 (TF-TG) ENSMUSG00000049892	false
23113	TF-TG	ENSMUSG00000000567 (TF-TG) ENSMUSG00000001761	false
23110	TF-TG	ENSMUSG00000000567 (TF-TG) ENSMUSG00000001281	false
23109	TF-TG	ENSMUSG00000000567 (TF-TG) ENSMUSG00000001120	false
31298	TF-TG	ENSMUSG00000038692 (TF-TG) ENSMUSG00000048970	false
23105	TF-TG	ENSMUSG00000000567 (TF-TG) ENSMUSG00000000394	false
23103	TF-TG	ENSMUSG00000000567 (TF-TG) ENSMUSG00000000214	false
31289	TF-TG	ENSMUSG00000038692 (TF-TG) ENSMUSG00000048148	false
31287	TF-TG	ENSMUSG00000038692 (TF-TG) ENSMUSG00000047842	false
31286	TF-TG	ENSMUSG00000038692 (TF-TG) ENSMUSG00000047810	false
31285	TF-TG	ENSMUSG00000038692 (TF-TG) ENSMUSG00000047747	false
31276	TF-TG	ENSMUSG00000038692 (TF-TG) ENSMUSG00000046697	false
31274	TF-TG	ENSMUSG00000038692 (TF-TG) ENSMUSG00000046668	false
31273	TF-TG	ENSMUSG00000038692 (TF-TG) ENSMUSG00000046591	false
31266	TF-TG	ENSMUSG00000038692 (TF-TG) ENSMUSG00000045790	false
31261	TF-TG	ENSMUSG00000038692 (TF-TG) ENSMUSG00000044933	false
31257	TF-TG	ENSMUSG00000038692 (TF-TG) ENSMUSG00000044288	false
31255	TF-TG	ENSMUSG00000038692 (TF-TG) ENSMUSG00000043154	false
31252	TF-TG	ENSMUSG00000038692 (TF-TG) ENSMUSG00000042712	false
31248	TF-TG	ENSMUSG00000038692 (TF-TG) ENSMUSG00000042251	false
31244	TF-TG	ENSMUSG00000038692 (TF-TG) ENSMUSG00000042041	false
31242	TF-TG	ENSMUSG00000038692 (TF-TG) ENSMUSG00000041945	false
31237	TF-TG	ENSMUSG00000038692 (TF-TG) ENSMUSG00000041570	false
31234	TF-TG	ENSMUSG00000038692 (TF-TG) ENSMUSG00000041193	false
31233	TF-TG	ENSMUSG00000038692 (TF-TG) ENSMUSG00000041126	false
31232	TF-TG	ENSMUSG00000038692 (TF-TG) ENSMUSG00000041096	false
31222	TF-TG	ENSMUSG00000038692 (TF-TG) ENSMUSG00000040209	false
31219	TF-TG	ENSMUSG00000038692 (TF-TG) ENSMUSG00000039814	false
31217	TF-TG	ENSMUSG00000038692 (TF-TG) ENSMUSG00000039713	false
31215	TF-TG	ENSMUSG00000038692 (TF-TG) ENSMUSG00000039620	false
31213	TF-TG	ENSMUSG00000038692 (TF-TG) ENSMUSG00000039497	false
31211	TF-TG	ENSMUSG00000038692 (TF-TG) ENSMUSG00000039384	false
31210	TF-TG	ENSMUSG00000038692 (TF-TG) ENSMUSG00000039270	false
31208	TF-TG	ENSMUSG00000038692 (TF-TG) ENSMUSG00000039157	false
31205	TF-TG	ENSMUSG00000038692 (TF-TG) ENSMUSG00000039059	false
31203	TF-TG	ENSMUSG00000038692 (TF-TG) ENSMUSG00000039005	false
31202	TF-TG	ENSMUSG00000038692 (TF-TG) ENSMUSG00000038768	false
31201	TF-TG	ENSMUSG00000038692 (TF-TG) ENSMUSG00000038644	false
31198	TF-TG	ENSMUSG00000038692 (TF-TG) ENSMUSG00000038456	false
31186	TF-TG	ENSMUSG00000038692 (TF-TG) ENSMUSG00000037348	false
31180	TF-TG	ENSMUSG00000038692 (TF-TG) ENSMUSG00000036932	false
31175	TF-TG	ENSMUSG00000038692 (TF-TG) ENSMUSG00000036599	false
31174	TF-TG	ENSMUSG00000038692 (TF-TG) ENSMUSG00000036306	false
31173	TF-TG	ENSMUSG00000038692 (TF-TG) ENSMUSG00000036181	false
31168	TF-TG	ENSMUSG00000038692 (TF-TG) ENSMUSG00000035637	false
31166	TF-TG	ENSMUSG00000038692 (TF-TG) ENSMUSG00000035504	false
31163	TF-TG	ENSMUSG00000038692 (TF-TG) ENSMUSG00000035181	false
31158	TF-TG	ENSMUSG00000038692 (TF-TG) ENSMUSG00000034593	false
31156	TF-TG	ENSMUSG00000038692 (TF-TG) ENSMUSG00000034528	false
31155	TF-TG	ENSMUSG00000038692 (TF-TG) ENSMUSG00000034379	false
31154	TF-TG	ENSMUSG00000038692 (TF-TG) ENSMUSG00000034164	false
31152	TF-TG	ENSMUSG00000038692 (TF-TG) ENSMUSG00000033900	false
31151	TF-TG	ENSMUSG00000038692 (TF-TG) ENSMUSG00000033825	false
31150	TF-TG	ENSMUSG00000038692 (TF-TG) ENSMUSG00000033705	false
31148	TF-TG	ENSMUSG00000038692 (TF-TG) ENSMUSG00000033684	false
31137	TF-TG	ENSMUSG00000038692 (TF-TG) ENSMUSG00000032454	false
31136	TF-TG	ENSMUSG00000038692 (TF-TG) ENSMUSG00000032373	false
31135	TF-TG	ENSMUSG00000038692 (TF-TG) ENSMUSG00000032353	false
31132	TF-TG	ENSMUSG00000038692 (TF-TG) ENSMUSG00000032202	false
31124	TF-TG	ENSMUSG00000038692 (TF-TG) ENSMUSG00000031902	false
31121	TF-TG	ENSMUSG00000038692 (TF-TG) ENSMUSG00000031833	false
31113	TF-TG	ENSMUSG00000038692 (TF-TG) ENSMUSG00000031586	false
31112	TF-TG	ENSMUSG00000038692 (TF-TG) ENSMUSG00000031584	false
31110	TF-TG	ENSMUSG00000038692 (TF-TG) ENSMUSG00000031562	false
31107	TF-TG	ENSMUSG00000038692 (TF-TG) ENSMUSG00000031448	false
31106	TF-TG	ENSMUSG00000038692 (TF-TG) ENSMUSG00000031444	false
31104	TF-TG	ENSMUSG00000038692 (TF-TG) ENSMUSG00000031378	false
31102	TF-TG	ENSMUSG00000038692 (TF-TG) ENSMUSG00000031353	false
31094	TF-TG	ENSMUSG00000038692 (TF-TG) ENSMUSG00000030659	false
31086	TF-TG	ENSMUSG00000038692 (TF-TG) ENSMUSG00000029875	false
31081	TF-TG	ENSMUSG00000038692 (TF-TG) ENSMUSG00000029436	false
31080	TF-TG	ENSMUSG00000038692 (TF-TG) ENSMUSG00000029380	false
31078	TF-TG	ENSMUSG00000038692 (TF-TG) ENSMUSG00000029287	false
31076	TF-TG	ENSMUSG00000038692 (TF-TG) ENSMUSG00000029059	false
31072	TF-TG	ENSMUSG00000038692 (TF-TG) ENSMUSG00000028716	false
31062	TF-TG	ENSMUSG00000038692 (TF-TG) ENSMUSG00000028289	false
31050	TF-TG	ENSMUSG00000038692 (TF-TG) ENSMUSG00000027715	false
31049	TF-TG	ENSMUSG00000038692 (TF-TG) ENSMUSG00000027698	false
31046	TF-TG	ENSMUSG00000038692 (TF-TG) ENSMUSG00000027654	false
31045	TF-TG	ENSMUSG00000038692 (TF-TG) ENSMUSG00000027611	false
31044	TF-TG	ENSMUSG00000038692 (TF-TG) ENSMUSG00000027420	false
