# Supplementary material for: Regulatory network analysis of Paneth cell and goblet cell enriched gut organoids using transcriptomics approaches
Source: Royal Society of Chemistry journal article supplement (doi:10.1039/c9mo00130a), 2019-12-10
Supplement: c9mo00130a1.cys [file c9mo00130a1.cys › CytoscapeSession-2019_09_26-22_01/tables/40235-1%3A+Cluster+3+%28Score%3A+6.145%29/LOCAL_ATTRS-org.cytoscape.model.CyNode-1%3A+Cluster+3+%28Score%3A+6.145%29+default+node.cytable]

CyCSV-Version	1
SUID	name	selected
java.lang.Long	java.lang.String	java.lang.Boolean
1: Cluster 3 (Score: 6.145) default node
1057	ENSMUSG00000051166	false
1053	ENSMUSG00000045838	false
2076	ENSMUSG00000046697	false
2072	ENSMUSG00000046598	false
1046	ENSMUSG00000039372	false
1045	ENSMUSG00000039005	false
1044	ENSMUSG00000038255	false
2068	ENSMUSG00000046410	false
2065	ENSMUSG00000046160	false
1038	ENSMUSG00000035299	false
1033	ENSMUSG00000034379	false
1032	ENSMUSG00000033307	false
1031	ENSMUSG00000033061	false
2052	ENSMUSG00000044933	false
2050	ENSMUSG00000044912	false
1024	ENSMUSG00000027254	false
1021	ENSMUSG00000026692	false
1020	ENSMUSG00000026443	false
2041	ENSMUSG00000044288	false
2038	ENSMUSG00000044033	false
2037	ENSMUSG00000044026	false
1012	ENSMUSG00000022687	false
2036	ENSMUSG00000044017	false
2034	ENSMUSG00000043885	false
1009	ENSMUSG00000021337	false
2030	ENSMUSG00000043461	false
1002	ENSMUSG00000010505	false
998	ENSMUSG00000005355	false
997	ENSMUSG00000005268	false
2019	ENSMUSG00000042751	false
2017	ENSMUSG00000042712	false
2016	ENSMUSG00000042686	false
2012	ENSMUSG00000042501	false
2007	ENSMUSG00000042251	false
2004	ENSMUSG00000042155	false
979	ENSMUSG00000098132	false
2003	ENSMUSG00000042041	false
978	ENSMUSG00000096847	false
2002	ENSMUSG00000041974	false
2001	ENSMUSG00000041945	false
973	ENSMUSG00000094626	false
1996	ENSMUSG00000041729	false
970	ENSMUSG00000091243	false
969	ENSMUSG00000090291	false
966	ENSMUSG00000079497	false
1989	ENSMUSG00000041420	false
963	ENSMUSG00000079018	false
1983	ENSMUSG00000041000	false
958	ENSMUSG00000078202	false
955	ENSMUSG00000075122	false
954	ENSMUSG00000075012	false
1974	ENSMUSG00000040624	false
942	ENSMUSG00000072214	false
1965	ENSMUSG00000040181	false
937	ENSMUSG00000071506	false
935	ENSMUSG00000070867	false
933	ENSMUSG00000070733	false
1954	ENSMUSG00000039713	false
1953	ENSMUSG00000039693	false
1949	ENSMUSG00000039620	false
924	ENSMUSG00000068735	false
922	ENSMUSG00000068617	false
920	ENSMUSG00000068196	false
1944	ENSMUSG00000039497	false
1943	ENSMUSG00000039384	false
918	ENSMUSG00000067279	false
912	ENSMUSG00000064247	false
911	ENSMUSG00000064246	false
1935	ENSMUSG00000039166	false
1933	ENSMUSG00000039157	false
1932	ENSMUSG00000039115	false
904	ENSMUSG00000063524	false
902	ENSMUSG00000062908	false
1925	ENSMUSG00000038768	false
901	ENSMUSG00000062683	false
1920	ENSMUSG00000038740	false
1918	ENSMUSG00000038692	false
893	ENSMUSG00000061397	false
1915	ENSMUSG00000038580	false
891	ENSMUSG00000060733	false
889	ENSMUSG00000060397	false
886	ENSMUSG00000059991	false
883	ENSMUSG00000059743	false
1905	ENSMUSG00000038181	false
879	ENSMUSG00000059401	false
877	ENSMUSG00000058975	false
875	ENSMUSG00000058454	false
874	ENSMUSG00000058290	false
1896	ENSMUSG00000037905	false
872	ENSMUSG00000058070	false
871	ENSMUSG00000057719	false
1893	ENSMUSG00000037709	false
867	ENSMUSG00000056895	false
866	ENSMUSG00000056832	false
1889	ENSMUSG00000037541	false
1888	ENSMUSG00000037493	false
1887	ENSMUSG00000037348	false
861	ENSMUSG00000056185	false
859	ENSMUSG00000055980	false
1880	ENSMUSG00000036932	false
855	ENSMUSG00000055745	false
1878	ENSMUSG00000036892	false
853	ENSMUSG00000055150	false
849	ENSMUSG00000054793	false
848	ENSMUSG00000054764	false
846	ENSMUSG00000054582	false
1866	ENSMUSG00000036306	false
841	ENSMUSG00000053783	false
840	ENSMUSG00000053768	false
1859	ENSMUSG00000036181	false
833	ENSMUSG00000053317	false
1856	ENSMUSG00000036053	false
828	ENSMUSG00000052921	false
825	ENSMUSG00000052135	false
823	ENSMUSG00000052087	false
822	ENSMUSG00000051980	false
1846	ENSMUSG00000035780	false
821	ENSMUSG00000051977	false
1843	ENSMUSG00000035637	false
1841	ENSMUSG00000035473	false
1840	ENSMUSG00000035451	false
816	ENSMUSG00000050953	false
1837	ENSMUSG00000035273	false
811	ENSMUSG00000050335	false
810	ENSMUSG00000050323	false
1834	ENSMUSG00000035109	false
1829	ENSMUSG00000034825	false
1826	ENSMUSG00000034724	false
797	ENSMUSG00000049288	false
1821	ENSMUSG00000034648	false
1820	ENSMUSG00000034586	false
1819	ENSMUSG00000034528	false
794	ENSMUSG00000048970	false
793	ENSMUSG00000048965	false
1814	ENSMUSG00000034164	false
1813	ENSMUSG00000034118	false
786	ENSMUSG00000048349	false
1808	ENSMUSG00000033825	false
1807	ENSMUSG00000033684	false
2830	mmu-miR-101a-3p	false
779	ENSMUSG00000047747	false
1801	ENSMUSG00000033581	false
1800	ENSMUSG00000033579	false
775	ENSMUSG00000047205	false
2822	mmu-miR-20b-5p	false
1796	ENSMUSG00000033308	false
770	ENSMUSG00000046668	false
769	ENSMUSG00000046591	false
763	ENSMUSG00000046215	false
759	ENSMUSG00000045896	false
758	ENSMUSG00000045790	false
1779	ENSMUSG00000032702	false
753	ENSMUSG00000045294	false
752	ENSMUSG00000045215	false
1771	ENSMUSG00000032454	false
746	ENSMUSG00000044548	false
1764	ENSMUSG00000032353	false
1760	ENSMUSG00000032285	false
735	ENSMUSG00000043154	false
1758	ENSMUSG00000032251	false
733	ENSMUSG00000042763	false
732	ENSMUSG00000042734	false
1753	ENSMUSG00000032092	false
729	ENSMUSG00000042564	false
728	ENSMUSG00000042429	false
727	ENSMUSG00000042359	false
1751	ENSMUSG00000032083	false
725	ENSMUSG00000042306	false
719	ENSMUSG00000042099	false
1740	ENSMUSG00000031902	false
714	ENSMUSG00000041889	false
711	ENSMUSG00000041609	false
710	ENSMUSG00000041570	false
1732	ENSMUSG00000031833	false
1731	ENSMUSG00000031785	false
705	ENSMUSG00000041193	false
703	ENSMUSG00000041126	false
702	ENSMUSG00000041120	false
701	ENSMUSG00000041096	false
1722	ENSMUSG00000031558	false
695	ENSMUSG00000040972	false
1716	ENSMUSG00000031448	false
692	ENSMUSG00000040663	false
690	ENSMUSG00000040495	false
1714	ENSMUSG00000031444	false
1713	ENSMUSG00000031378	false
2734	ENSMUSG00000097632	false
1709	ENSMUSG00000031351	false
1708	ENSMUSG00000031327	false
2731	ENSMUSG00000102123	false
682	ENSMUSG00000040276	false
681	ENSMUSG00000040209	false
680	ENSMUSG00000040170	false
2726	ENSMUSG00000111202	false
677	ENSMUSG00000039814	false
675	ENSMUSG00000039809	false
2722	ENSMUSG00000110697	false
674	ENSMUSG00000039740	false
2719	ENSMUSG00000108961	false
671	ENSMUSG00000039396	false
670	ENSMUSG00000039304	false
669	ENSMUSG00000039270	false
668	ENSMUSG00000039168	false
2714	ENSMUSG00000107689	false
2713	ENSMUSG00000097797	false
664	ENSMUSG00000039059	false
2711	ENSMUSG00000108356	false
661	ENSMUSG00000039004	false
660	ENSMUSG00000038984	false
656	ENSMUSG00000038644	false
652	ENSMUSG00000038456	false
2700	ENSMUSG00000085126	false
647	ENSMUSG00000038319	false
1669	ENSMUSG00000029875	false
1666	ENSMUSG00000029811	false
640	ENSMUSG00000037855	false
1663	ENSMUSG00000029762	false
2686	ENSMUSG00000097281	false
636	ENSMUSG00000037712	false
2684	ENSMUSG00000085017	false
635	ENSMUSG00000037686	false
632	ENSMUSG00000037628	false
1650	ENSMUSG00000029436	false
624	ENSMUSG00000037440	false
1645	ENSMUSG00000029380	false
615	ENSMUSG00000037005	false
1637	ENSMUSG00000029245	false
608	ENSMUSG00000036832	false
607	ENSMUSG00000036745	false
606	ENSMUSG00000036667	false
605	ENSMUSG00000036599	false
1629	ENSMUSG00000029121	false
1626	ENSMUSG00000028986	false
600	ENSMUSG00000035849	false
596	ENSMUSG00000035506	false
595	ENSMUSG00000035504	false
593	ENSMUSG00000035431	false
590	ENSMUSG00000035235	false
589	ENSMUSG00000035181	false
1612	ENSMUSG00000028518	false
585	ENSMUSG00000035095	false
1605	ENSMUSG00000028223	false
579	ENSMUSG00000034573	false
575	ENSMUSG00000034285	false
573	ENSMUSG00000034227	false
571	ENSMUSG00000034006	false
570	ENSMUSG00000033952	false
569	ENSMUSG00000033900	false
1591	ENSMUSG00000028024	false
566	ENSMUSG00000033717	false
565	ENSMUSG00000033705	false
551	ENSMUSG00000032965	false
550	ENSMUSG00000032883	false
1573	ENSMUSG00000027611	false
1569	ENSMUSG00000027447	false
1568	ENSMUSG00000027438	false
542	ENSMUSG00000032666	false
539	ENSMUSG00000032531	false
1561	ENSMUSG00000027346	false
534	ENSMUSG00000032373	false
533	ENSMUSG00000032358	false
532	ENSMUSG00000032356	false
531	ENSMUSG00000032338	false
1555	ENSMUSG00000027219	false
1553	ENSMUSG00000027175	false
1551	ENSMUSG00000027075	false
526	ENSMUSG00000032202	false
1550	ENSMUSG00000027074	false
517	ENSMUSG00000031790	false
1540	ENSMUSG00000026785	false
1536	ENSMUSG00000026688	false
511	ENSMUSG00000031626	false
509	ENSMUSG00000031586	false
1532	ENSMUSG00000026586	false
508	ENSMUSG00000031562	false
1528	ENSMUSG00000026479	false
501	ENSMUSG00000031353	false
1524	ENSMUSG00000026417	false
1519	ENSMUSG00000026380	false
1516	ENSMUSG00000026321	false
1515	ENSMUSG00000026311	false
489	ENSMUSG00000030659	false
486	ENSMUSG00000030510	false
483	ENSMUSG00000030137	false
482	ENSMUSG00000030110	false
481	ENSMUSG00000030107	false
480	ENSMUSG00000030087	false
477	ENSMUSG00000029910	false
1495	ENSMUSG00000025779	false
1492	ENSMUSG00000025726	false
1491	ENSMUSG00000025652	false
1487	ENSMUSG00000025576	false
463	ENSMUSG00000029168	false
460	ENSMUSG00000029153	false
1483	ENSMUSG00000025479	false
457	ENSMUSG00000029059	false
455	ENSMUSG00000028940	false
1479	ENSMUSG00000025428	false
453	ENSMUSG00000028763	false
452	ENSMUSG00000028749	false
450	ENSMUSG00000028716	false
1472	ENSMUSG00000025207	false
2487	ENSMUSG00000020651	false
1463	ENSMUSG00000025150	false
437	ENSMUSG00000028435	false
435	ENSMUSG00000028312	false
1459	ENSMUSG00000025081	false
434	ENSMUSG00000028289	false
1451	ENSMUSG00000024960	false
1450	ENSMUSG00000024935	false
420	ENSMUSG00000027715	false
419	ENSMUSG00000027698	false
418	ENSMUSG00000027661	false
417	ENSMUSG00000027654	false
2465	ENSMUSG00000075602	false
1437	ENSMUSG00000024664	false
413	ENSMUSG00000027469	false
412	ENSMUSG00000027420	false
1434	ENSMUSG00000024533	false
406	ENSMUSG00000027187	false
403	ENSMUSG00000026981	false
1427	ENSMUSG00000024424	false
1424	ENSMUSG00000024411	false
397	ENSMUSG00000026848	false
2444	ENSMUSG00000027805	false
1419	ENSMUSG00000024302	false
2442	ENSMUSG00000001128	false
1418	ENSMUSG00000024292	false
1416	ENSMUSG00000024175	false
388	ENSMUSG00000026504	false
1411	ENSMUSG00000024063	false
387	ENSMUSG00000026483	false
1410	ENSMUSG00000024055	false
385	ENSMUSG00000026442	false
384	ENSMUSG00000026430	false
1408	ENSMUSG00000024029	false
381	ENSMUSG00000026247	false
1401	ENSMUSG00000023829	false
376	ENSMUSG00000025991	false
1396	ENSMUSG00000023243	false
371	ENSMUSG00000025876	false
2416	ENSMUSG00000110206	false
366	ENSMUSG00000025557	false
1390	ENSMUSG00000023045	false
1385	ENSMUSG00000022863	false
361	ENSMUSG00000025410	false
359	ENSMUSG00000025351	false
358	ENSMUSG00000025227	false
355	ENSMUSG00000025089	false
2399	ENSMUSG00000092083	false
1375	ENSMUSG00000022619	false
349	ENSMUSG00000024978	false
347	ENSMUSG00000024899	false
346	ENSMUSG00000024897	false
344	ENSMUSG00000024810	false
341	ENSMUSG00000024738	false
1365	ENSMUSG00000022489	false
340	ENSMUSG00000024727	false
1364	ENSMUSG00000022477	false
1363	ENSMUSG00000022456	false
339	ENSMUSG00000024713	false
338	ENSMUSG00000024659	false
1361	ENSMUSG00000022436	false
1360	ENSMUSG00000022435	false
1359	ENSMUSG00000022332	false
333	ENSMUSG00000024548	false
331	ENSMUSG00000024479	false
2379	ENSMUSG00000079038	false
329	ENSMUSG00000024352	false
2374	ENSMUSG00000078695	false
324	ENSMUSG00000024140	false
1347	ENSMUSG00000021994	false
1345	ENSMUSG00000021944	false
320	ENSMUSG00000023963	false
2368	ENSMUSG00000078349	false
1344	ENSMUSG00000021928	false
1343	ENSMUSG00000021913	false
1339	ENSMUSG00000021798	false
313	ENSMUSG00000023800	false
1335	ENSMUSG00000021700	false
2359	ENSMUSG00000075033	false
1334	ENSMUSG00000021685	false
310	ENSMUSG00000023247	false
1330	ENSMUSG00000021608	false
305	ENSMUSG00000023015	false
2350	ENSMUSG00000074628	false
1322	ENSMUSG00000021303	false
298	ENSMUSG00000022844	false
295	ENSMUSG00000022817	false
2342	ENSMUSG00000074207	false
294	ENSMUSG00000022742	false
293	ENSMUSG00000022652	false
292	ENSMUSG00000022637	false
1315	ENSMUSG00000021123	false
1312	ENSMUSG00000020986	false
287	ENSMUSG00000022519	false
2333	ENSMUSG00000073481	false
1307	ENSMUSG00000020788	false
1306	ENSMUSG00000020766	false
1305	ENSMUSG00000020732	false
281	ENSMUSG00000022219	false
1304	ENSMUSG00000020707	false
1303	ENSMUSG00000020696	false
278	ENSMUSG00000022178	false
2326	ENSMUSG00000072294	false
1301	ENSMUSG00000020658	false
274	ENSMUSG00000022051	false
1298	ENSMUSG00000020572	false
273	ENSMUSG00000022033	false
2319	ENSMUSG00000070803	false
2318	ENSMUSG00000070661	false
1294	ENSMUSG00000020467	false
1293	ENSMUSG00000020462	false
1288	ENSMUSG00000020388	false
263	ENSMUSG00000021604	false
259	ENSMUSG00000021367	false
2307	ENSMUSG00000068874	false
2305	ENSMUSG00000068323	false
257	ENSMUSG00000021240	false
256	ENSMUSG00000021223	false
255	ENSMUSG00000021203	false
253	ENSMUSG00000021194	false
2301	ENSMUSG00000068101	false
2299	ENSMUSG00000067818	false
1274	ENSMUSG00000020010	false
244	ENSMUSG00000020846	false
2291	ENSMUSG00000066441	false
242	ENSMUSG00000020747	false
2288	ENSMUSG00000066191	false
239	ENSMUSG00000020674	false
1263	ENSMUSG00000019775	false
238	ENSMUSG00000020668	false
1261	ENSMUSG00000019235	false
2284	ENSMUSG00000064272	false
236	ENSMUSG00000020599	false
234	ENSMUSG00000020424	false
2277	ENSMUSG00000064080	false
228	ENSMUSG00000020303	false
1250	ENSMUSG00000018672	false
226	ENSMUSG00000020121	false
2274	ENSMUSG00000063704	false
225	ENSMUSG00000020105	false
1247	ENSMUSG00000018507	false
1243	ENSMUSG00000017943	false
215	ENSMUSG00000019817	false
2262	ENSMUSG00000061959	false
213	ENSMUSG00000019647	false
2261	ENSMUSG00000061838	false
1235	ENSMUSG00000016534	false
1233	ENSMUSG00000015962	false
1232	ENSMUSG00000015709	false
207	ENSMUSG00000018774	false
1227	ENSMUSG00000015222	false
203	ENSMUSG00000018340	false
2250	ENSMUSG00000060613	false
1226	ENSMUSG00000015189	false
1224	ENSMUSG00000014846	false
2244	ENSMUSG00000059895	false
1220	ENSMUSG00000013523	false
194	ENSMUSG00000017204	false
2239	ENSMUSG00000059149	false
2238	ENSMUSG00000059060	false
2237	ENSMUSG00000058952	false
2234	ENSMUSG00000058586	false
184	ENSMUSG00000015806	false
1206	ENSMUSG00000009614	false
1204	ENSMUSG00000009246	false
1203	ENSMUSG00000008540	false
1202	ENSMUSG00000008461	false
178	ENSMUSG00000014602	false
1198	ENSMUSG00000006777	false
1195	ENSMUSG00000006575	false
168	ENSMUSG00000010830	false
1191	ENSMUSG00000006369	false
166	ENSMUSG00000009863	false
2214	ENSMUSG00000056671	false
164	ENSMUSG00000008734	false
163	ENSMUSG00000008090	false
162	ENSMUSG00000007989	false
1184	ENSMUSG00000005267	false
2204	ENSMUSG00000055730	false
1179	ENSMUSG00000004558	false
155	ENSMUSG00000006435	false
154	ENSMUSG00000006345	false
2201	ENSMUSG00000055567	false
153	ENSMUSG00000005986	false
152	ENSMUSG00000005973	false
151	ENSMUSG00000005958	false
2198	ENSMUSG00000055485	false
1173	ENSMUSG00000003436	false
147	ENSMUSG00000005360	false
1170	ENSMUSG00000003352	false
141	ENSMUSG00000004768	false
2186	ENSMUSG00000054598	false
137	ENSMUSG00000003949	false
2185	ENSMUSG00000054469	false
1157	ENSMUSG00000001901	false
1156	ENSMUSG00000001819	false
132	ENSMUSG00000003380	false
128	ENSMUSG00000002565	false
127	ENSMUSG00000001864	false
126	ENSMUSG00000001761	false
2172	ENSMUSG00000053279	false
123	ENSMUSG00000001281	false
122	ENSMUSG00000001120	false
1145	ENSMUSG00000001225	false
1144	ENSMUSG00000001095	false
118	ENSMUSG00000000394	false
2166	ENSMUSG00000052609	false
1142	ENSMUSG00000001023	false
116	ENSMUSG00000000214	false
2163	ENSMUSG00000052396	false
113	ENSMUSG00000000567	false
111	ENSMUSG00000053007	false
2157	ENSMUSG00000051726	false
1131	ENSMUSG00000000253	false
2150	ENSMUSG00000051483	false
1123	ENSMUSG00000056035	false
1119	ENSMUSG00000029287	false
2142	ENSMUSG00000050824	false
2140	ENSMUSG00000050751	false
91	ENSMUSG00000015568	false
1115	ENSMUSG00000042010	false
90	ENSMUSG00000052684	false
1110	ENSMUSG00000020660	false
1108	ENSMUSG00000072235	false
1107	ENSMUSG00000060002	false
1105	ENSMUSG00000055978	false
2129	ENSMUSG00000049892	false
80	ENSMUSG00000058756	false
78	ENSMUSG00000022809	false
1101	ENSMUSG00000049313	false
75	ENSMUSG00000021779	false
2123	ENSMUSG00000049436	false
1098	ENSMUSG00000042631	false
1096	ENSMUSG00000040136	false
1095	ENSMUSG00000039958	false
1091	ENSMUSG00000034593	false
1089	ENSMUSG00000031584	false
1085	ENSMUSG00000026786	false
2109	ENSMUSG00000048373	false
1084	ENSMUSG00000026548	false
1082	ENSMUSG00000023832	false
1081	ENSMUSG00000021720	false
2104	ENSMUSG00000048148	false
2103	ENSMUSG00000048078	false
2101	ENSMUSG00000048022	false
1074	ENSMUSG00000004151	false
2098	ENSMUSG00000047875	false
2095	ENSMUSG00000047842	false
2094	ENSMUSG00000047810	false
2091	ENSMUSG00000047730	false
2090	ENSMUSG00000047728	false
1061	ENSMUSG00000058624	false
