# Supplementary material for: Regulatory network analysis of Paneth cell and goblet cell enriched gut organoids using transcriptomics approaches
Source: Royal Society of Chemistry journal article supplement (doi:10.1039/c9mo00130a), 2019-12-10
Supplement: c9mo00130a1.cys [file c9mo00130a1.cys › CytoscapeSession-2019_09_26-22_01/tables/cytables.xml]

<?xml version="1.0" encoding="UTF-8" standalone="yes"?>
<cyTables>
    <virtualColumns>
        <virtualColumn name="shared name" sourceColumn="shared name" sourceTable="36-Pan_network_lfc1.txt/SHARED_ATTRS-org.cytoscape.model.CyNode-36+shared+node.cytable" sourceJoinKey="SUID" targetTable="40215-1%3A+Cluster+4+%28Score%3A+4.235%29/LOCAL_ATTRS-org.cytoscape.model.CyNode-1%3A+Cluster+4+%28Score%3A+4.235%29+default+node.cytable" targetJoinKey="SUID" immutable="false"/>
        <virtualColumn name="Chea3_Library" sourceColumn="Chea3_Library" sourceTable="36-Pan_network_lfc1.txt/SHARED_ATTRS-org.cytoscape.model.CyNode-36+shared+node.cytable" sourceJoinKey="SUID" targetTable="40215-1%3A+Cluster+4+%28Score%3A+4.235%29/LOCAL_ATTRS-org.cytoscape.model.CyNode-1%3A+Cluster+4+%28Score%3A+4.235%29+default+node.cytable" targetJoinKey="SUID" immutable="false"/>
        <virtualColumn name="Chea3_Overlapping_Genes" sourceColumn="Chea3_Overlapping_Genes" sourceTable="36-Pan_network_lfc1.txt/SHARED_ATTRS-org.cytoscape.model.CyNode-36+shared+node.cytable" sourceJoinKey="SUID" targetTable="40215-1%3A+Cluster+4+%28Score%3A+4.235%29/LOCAL_ATTRS-org.cytoscape.model.CyNode-1%3A+Cluster+4+%28Score%3A+4.235%29+default+node.cytable" targetJoinKey="SUID" immutable="false"/>
        <virtualColumn name="Chea3_Rank" sourceColumn="Chea3_Rank" sourceTable="36-Pan_network_lfc1.txt/SHARED_ATTRS-org.cytoscape.model.CyNode-36+shared+node.cytable" sourceJoinKey="SUID" targetTable="40215-1%3A+Cluster+4+%28Score%3A+4.235%29/LOCAL_ATTRS-org.cytoscape.model.CyNode-1%3A+Cluster+4+%28Score%3A+4.235%29+default+node.cytable" targetJoinKey="SUID" immutable="false"/>
        <virtualColumn name="chea3_Score" sourceColumn="chea3_Score" sourceTable="36-Pan_network_lfc1.txt/SHARED_ATTRS-org.cytoscape.model.CyNode-36+shared+node.cytable" sourceJoinKey="SUID" targetTable="40215-1%3A+Cluster+4+%28Score%3A+4.235%29/LOCAL_ATTRS-org.cytoscape.model.CyNode-1%3A+Cluster+4+%28Score%3A+4.235%29+default+node.cytable" targetJoinKey="SUID" immutable="false"/>
        <virtualColumn name="genesymbol" sourceColumn="genesymbol" sourceTable="36-Pan_network_lfc1.txt/SHARED_ATTRS-org.cytoscape.model.CyNode-36+shared+node.cytable" sourceJoinKey="SUID" targetTable="40215-1%3A+Cluster+4+%28Score%3A+4.235%29/LOCAL_ATTRS-org.cytoscape.model.CyNode-1%3A+Cluster+4+%28Score%3A+4.235%29+default+node.cytable" targetJoinKey="SUID" immutable="false"/>
        <virtualColumn name="isExcludedFromPaths" sourceColumn="isExcludedFromPaths" sourceTable="36-Pan_network_lfc1.txt/SHARED_ATTRS-org.cytoscape.model.CyNode-36+shared+node.cytable" sourceJoinKey="SUID" targetTable="40215-1%3A+Cluster+4+%28Score%3A+4.235%29/LOCAL_ATTRS-org.cytoscape.model.CyNode-1%3A+Cluster+4+%28Score%3A+4.235%29+default+node.cytable" targetJoinKey="SUID" immutable="false"/>
        <virtualColumn name="isInPath" sourceColumn="isInPath" sourceTable="36-Pan_network_lfc1.txt/SHARED_ATTRS-org.cytoscape.model.CyNode-36+shared+node.cytable" sourceJoinKey="SUID" targetTable="40215-1%3A+Cluster+4+%28Score%3A+4.235%29/LOCAL_ATTRS-org.cytoscape.model.CyNode-1%3A+Cluster+4+%28Score%3A+4.235%29+default+node.cytable" targetJoinKey="SUID" immutable="false"/>
        <virtualColumn name="Module_Color" sourceColumn="Module_Color" sourceTable="36-Pan_network_lfc1.txt/SHARED_ATTRS-org.cytoscape.model.CyNode-36+shared+node.cytable" sourceJoinKey="SUID" targetTable="40215-1%3A+Cluster+4+%28Score%3A+4.235%29/LOCAL_ATTRS-org.cytoscape.model.CyNode-1%3A+Cluster+4+%28Score%3A+4.235%29+default+node.cytable" targetJoinKey="SUID" immutable="false"/>
        <virtualColumn name="MCODE_Cluster" sourceColumn="MCODE_Cluster" sourceTable="36-Pan_network_lfc1.txt/SHARED_ATTRS-org.cytoscape.model.CyNode-36+shared+node.cytable" sourceJoinKey="SUID" targetTable="40215-1%3A+Cluster+4+%28Score%3A+4.235%29/LOCAL_ATTRS-org.cytoscape.model.CyNode-1%3A+Cluster+4+%28Score%3A+4.235%29+default+node.cytable" targetJoinKey="SUID" immutable="false"/>
        <virtualColumn name="MCODE_Node_Status" sourceColumn="MCODE_Node_Status" sourceTable="36-Pan_network_lfc1.txt/SHARED_ATTRS-org.cytoscape.model.CyNode-36+shared+node.cytable" sourceJoinKey="SUID" targetTable="40215-1%3A+Cluster+4+%28Score%3A+4.235%29/LOCAL_ATTRS-org.cytoscape.model.CyNode-1%3A+Cluster+4+%28Score%3A+4.235%29+default+node.cytable" targetJoinKey="SUID" immutable="false"/>
        <virtualColumn name="MCODE_Score" sourceColumn="MCODE_Score" sourceTable="36-Pan_network_lfc1.txt/SHARED_ATTRS-org.cytoscape.model.CyNode-36+shared+node.cytable" sourceJoinKey="SUID" targetTable="40215-1%3A+Cluster+4+%28Score%3A+4.235%29/LOCAL_ATTRS-org.cytoscape.model.CyNode-1%3A+Cluster+4+%28Score%3A+4.235%29+default+node.cytable" targetJoinKey="SUID" immutable="false"/>
        <virtualColumn name="shared name" sourceColumn="shared name" sourceTable="36-Pan_network_lfc1.txt/SHARED_ATTRS-org.cytoscape.model.CyNetwork-36+shared+network.cytable" sourceJoinKey="SUID" targetTable="40205-1%3A+Cluster+2+%28Score%3A+7.03%29/LOCAL_ATTRS-org.cytoscape.model.CyNetwork-1%3A+Cluster+2+%28Score%3A+7.03%29+default+network.cytable" targetJoinKey="SUID" immutable="false"/>
        <virtualColumn name="shared name" sourceColumn="shared name" sourceTable="36-Pan_network_lfc1.txt/SHARED_ATTRS-org.cytoscape.model.CyEdge-36+shared+edge.cytable" sourceJoinKey="SUID" targetTable="52-52/LOCAL_ATTRS-org.cytoscape.model.CyEdge-52+default+edge.cytable" targetJoinKey="SUID" immutable="false"/>
        <virtualColumn name="shared interaction" sourceColumn="shared interaction" sourceTable="36-Pan_network_lfc1.txt/SHARED_ATTRS-org.cytoscape.model.CyEdge-36+shared+edge.cytable" sourceJoinKey="SUID" targetTable="52-52/LOCAL_ATTRS-org.cytoscape.model.CyEdge-52+default+edge.cytable" targetJoinKey="SUID" immutable="false"/>
        <virtualColumn name="isInPath" sourceColumn="isInPath" sourceTable="36-Pan_network_lfc1.txt/SHARED_ATTRS-org.cytoscape.model.CyEdge-36+shared+edge.cytable" sourceJoinKey="SUID" targetTable="52-52/LOCAL_ATTRS-org.cytoscape.model.CyEdge-52+default+edge.cytable" targetJoinKey="SUID" immutable="false"/>
        <virtualColumn name="Module_Edge_Color" sourceColumn="Module_Edge_Color" sourceTable="36-Pan_network_lfc1.txt/SHARED_ATTRS-org.cytoscape.model.CyEdge-36+shared+edge.cytable" sourceJoinKey="SUID" targetTable="52-52/LOCAL_ATTRS-org.cytoscape.model.CyEdge-52+default+edge.cytable" targetJoinKey="SUID" immutable="false"/>
        <virtualColumn name="shared name" sourceColumn="shared name" sourceTable="36-Pan_network_lfc1.txt/SHARED_ATTRS-org.cytoscape.model.CyNetwork-36+shared+network.cytable" sourceJoinKey="SUID" targetTable="40225-1%3A+Cluster+5+%28Score%3A+2.667%29/LOCAL_ATTRS-org.cytoscape.model.CyNetwork-1%3A+Cluster+5+%28Score%3A+2.667%29+default+network.cytable" targetJoinKey="SUID" immutable="false"/>
        <virtualColumn name="shared name" sourceColumn="shared name" sourceTable="36-Pan_network_lfc1.txt/SHARED_ATTRS-org.cytoscape.model.CyEdge-36+shared+edge.cytable" sourceJoinKey="SUID" targetTable="36-Pan_network_lfc1.txt/LOCAL_ATTRS-org.cytoscape.model.CyEdge-36+default+edge.cytable" targetJoinKey="SUID" immutable="false"/>
        <virtualColumn name="shared interaction" sourceColumn="shared interaction" sourceTable="36-Pan_network_lfc1.txt/SHARED_ATTRS-org.cytoscape.model.CyEdge-36+shared+edge.cytable" sourceJoinKey="SUID" targetTable="36-Pan_network_lfc1.txt/LOCAL_ATTRS-org.cytoscape.model.CyEdge-36+default+edge.cytable" targetJoinKey="SUID" immutable="false"/>
        <virtualColumn name="isInPath" sourceColumn="isInPath" sourceTable="36-Pan_network_lfc1.txt/SHARED_ATTRS-org.cytoscape.model.CyEdge-36+shared+edge.cytable" sourceJoinKey="SUID" targetTable="36-Pan_network_lfc1.txt/LOCAL_ATTRS-org.cytoscape.model.CyEdge-36+default+edge.cytable" targetJoinKey="SUID" immutable="false"/>
        <virtualColumn name="Module_Edge_Color" sourceColumn="Module_Edge_Color" sourceTable="36-Pan_network_lfc1.txt/SHARED_ATTRS-org.cytoscape.model.CyEdge-36+shared+edge.cytable" sourceJoinKey="SUID" targetTable="36-Pan_network_lfc1.txt/LOCAL_ATTRS-org.cytoscape.model.CyEdge-36+default+edge.cytable" targetJoinKey="SUID" immutable="false"/>
        <virtualColumn name="shared name" sourceColumn="shared name" sourceTable="36-Pan_network_lfc1.txt/SHARED_ATTRS-org.cytoscape.model.CyNetwork-36+shared+network.cytable" sourceJoinKey="SUID" targetTable="52-52/LOCAL_ATTRS-org.cytoscape.model.CyNetwork-52+default+network.cytable" targetJoinKey="SUID" immutable="false"/>
        <virtualColumn name="shared name" sourceColumn="shared name" sourceTable="36-Pan_network_lfc1.txt/SHARED_ATTRS-org.cytoscape.model.CyNode-36+shared+node.cytable" sourceJoinKey="SUID" targetTable="40225-1%3A+Cluster+5+%28Score%3A+2.667%29/LOCAL_ATTRS-org.cytoscape.model.CyNode-1%3A+Cluster+5+%28Score%3A+2.667%29+default+node.cytable" targetJoinKey="SUID" immutable="false"/>
        <virtualColumn name="Chea3_Library" sourceColumn="Chea3_Library" sourceTable="36-Pan_network_lfc1.txt/SHARED_ATTRS-org.cytoscape.model.CyNode-36+shared+node.cytable" sourceJoinKey="SUID" targetTable="40225-1%3A+Cluster+5+%28Score%3A+2.667%29/LOCAL_ATTRS-org.cytoscape.model.CyNode-1%3A+Cluster+5+%28Score%3A+2.667%29+default+node.cytable" targetJoinKey="SUID" immutable="false"/>
        <virtualColumn name="Chea3_Overlapping_Genes" sourceColumn="Chea3_Overlapping_Genes" sourceTable="36-Pan_network_lfc1.txt/SHARED_ATTRS-org.cytoscape.model.CyNode-36+shared+node.cytable" sourceJoinKey="SUID" targetTable="40225-1%3A+Cluster+5+%28Score%3A+2.667%29/LOCAL_ATTRS-org.cytoscape.model.CyNode-1%3A+Cluster+5+%28Score%3A+2.667%29+default+node.cytable" targetJoinKey="SUID" immutable="false"/>
        <virtualColumn name="Chea3_Rank" sourceColumn="Chea3_Rank" sourceTable="36-Pan_network_lfc1.txt/SHARED_ATTRS-org.cytoscape.model.CyNode-36+shared+node.cytable" sourceJoinKey="SUID" targetTable="40225-1%3A+Cluster+5+%28Score%3A+2.667%29/LOCAL_ATTRS-org.cytoscape.model.CyNode-1%3A+Cluster+5+%28Score%3A+2.667%29+default+node.cytable" targetJoinKey="SUID" immutable="false"/>
        <virtualColumn name="chea3_Score" sourceColumn="chea3_Score" sourceTable="36-Pan_network_lfc1.txt/SHARED_ATTRS-org.cytoscape.model.CyNode-36+shared+node.cytable" sourceJoinKey="SUID" targetTable="40225-1%3A+Cluster+5+%28Score%3A+2.667%29/LOCAL_ATTRS-org.cytoscape.model.CyNode-1%3A+Cluster+5+%28Score%3A+2.667%29+default+node.cytable" targetJoinKey="SUID" immutable="false"/>
        <virtualColumn name="genesymbol" sourceColumn="genesymbol" sourceTable="36-Pan_network_lfc1.txt/SHARED_ATTRS-org.cytoscape.model.CyNode-36+shared+node.cytable" sourceJoinKey="SUID" targetTable="40225-1%3A+Cluster+5+%28Score%3A+2.667%29/LOCAL_ATTRS-org.cytoscape.model.CyNode-1%3A+Cluster+5+%28Score%3A+2.667%29+default+node.cytable" targetJoinKey="SUID" immutable="false"/>
        <virtualColumn name="isExcludedFromPaths" sourceColumn="isExcludedFromPaths" sourceTable="36-Pan_network_lfc1.txt/SHARED_ATTRS-org.cytoscape.model.CyNode-36+shared+node.cytable" sourceJoinKey="SUID" targetTable="40225-1%3A+Cluster+5+%28Score%3A+2.667%29/LOCAL_ATTRS-org.cytoscape.model.CyNode-1%3A+Cluster+5+%28Score%3A+2.667%29+default+node.cytable" targetJoinKey="SUID" immutable="false"/>
        <virtualColumn name="isInPath" sourceColumn="isInPath" sourceTable="36-Pan_network_lfc1.txt/SHARED_ATTRS-org.cytoscape.model.CyNode-36+shared+node.cytable" sourceJoinKey="SUID" targetTable="40225-1%3A+Cluster+5+%28Score%3A+2.667%29/LOCAL_ATTRS-org.cytoscape.model.CyNode-1%3A+Cluster+5+%28Score%3A+2.667%29+default+node.cytable" targetJoinKey="SUID" immutable="false"/>
        <virtualColumn name="Module_Color" sourceColumn="Module_Color" sourceTable="36-Pan_network_lfc1.txt/SHARED_ATTRS-org.cytoscape.model.CyNode-36+shared+node.cytable" sourceJoinKey="SUID" targetTable="40225-1%3A+Cluster+5+%28Score%3A+2.667%29/LOCAL_ATTRS-org.cytoscape.model.CyNode-1%3A+Cluster+5+%28Score%3A+2.667%29+default+node.cytable" targetJoinKey="SUID" immutable="false"/>
        <virtualColumn name="MCODE_Cluster" sourceColumn="MCODE_Cluster" sourceTable="36-Pan_network_lfc1.txt/SHARED_ATTRS-org.cytoscape.model.CyNode-36+shared+node.cytable" sourceJoinKey="SUID" targetTable="40225-1%3A+Cluster+5+%28Score%3A+2.667%29/LOCAL_ATTRS-org.cytoscape.model.CyNode-1%3A+Cluster+5+%28Score%3A+2.667%29+default+node.cytable" targetJoinKey="SUID" immutable="false"/>
        <virtualColumn name="MCODE_Node_Status" sourceColumn="MCODE_Node_Status" sourceTable="36-Pan_network_lfc1.txt/SHARED_ATTRS-org.cytoscape.model.CyNode-36+shared+node.cytable" sourceJoinKey="SUID" targetTable="40225-1%3A+Cluster+5+%28Score%3A+2.667%29/LOCAL_ATTRS-org.cytoscape.model.CyNode-1%3A+Cluster+5+%28Score%3A+2.667%29+default+node.cytable" targetJoinKey="SUID" immutable="false"/>
        <virtualColumn name="MCODE_Score" sourceColumn="MCODE_Score" sourceTable="36-Pan_network_lfc1.txt/SHARED_ATTRS-org.cytoscape.model.CyNode-36+shared+node.cytable" sourceJoinKey="SUID" targetTable="40225-1%3A+Cluster+5+%28Score%3A+2.667%29/LOCAL_ATTRS-org.cytoscape.model.CyNode-1%3A+Cluster+5+%28Score%3A+2.667%29+default+node.cytable" targetJoinKey="SUID" immutable="false"/>
        <virtualColumn name="shared name" sourceColumn="shared name" sourceTable="36-Pan_network_lfc1.txt/SHARED_ATTRS-org.cytoscape.model.CyNetwork-36+shared+network.cytable" sourceJoinKey="SUID" targetTable="40195-1%3A+Cluster+1+%28Score%3A+17.048%29/LOCAL_ATTRS-org.cytoscape.model.CyNetwork-1%3A+Cluster+1+%28Score%3A+17.048%29+default+network.cytable" targetJoinKey="SUID" immutable="false"/>
        <virtualColumn name="shared name" sourceColumn="shared name" sourceTable="36-Pan_network_lfc1.txt/SHARED_ATTRS-org.cytoscape.model.CyEdge-36+shared+edge.cytable" sourceJoinKey="SUID" targetTable="40225-1%3A+Cluster+5+%28Score%3A+2.667%29/LOCAL_ATTRS-org.cytoscape.model.CyEdge-1%3A+Cluster+5+%28Score%3A+2.667%29+default+edge.cytable" targetJoinKey="SUID" immutable="false"/>
        <virtualColumn name="shared interaction" sourceColumn="shared interaction" sourceTable="36-Pan_network_lfc1.txt/SHARED_ATTRS-org.cytoscape.model.CyEdge-36+shared+edge.cytable" sourceJoinKey="SUID" targetTable="40225-1%3A+Cluster+5+%28Score%3A+2.667%29/LOCAL_ATTRS-org.cytoscape.model.CyEdge-1%3A+Cluster+5+%28Score%3A+2.667%29+default+edge.cytable" targetJoinKey="SUID" immutable="false"/>
        <virtualColumn name="isInPath" sourceColumn="isInPath" sourceTable="36-Pan_network_lfc1.txt/SHARED_ATTRS-org.cytoscape.model.CyEdge-36+shared+edge.cytable" sourceJoinKey="SUID" targetTable="40225-1%3A+Cluster+5+%28Score%3A+2.667%29/LOCAL_ATTRS-org.cytoscape.model.CyEdge-1%3A+Cluster+5+%28Score%3A+2.667%29+default+edge.cytable" targetJoinKey="SUID" immutable="false"/>
        <virtualColumn name="Module_Edge_Color" sourceColumn="Module_Edge_Color" sourceTable="36-Pan_network_lfc1.txt/SHARED_ATTRS-org.cytoscape.model.CyEdge-36+shared+edge.cytable" sourceJoinKey="SUID" targetTable="40225-1%3A+Cluster+5+%28Score%3A+2.667%29/LOCAL_ATTRS-org.cytoscape.model.CyEdge-1%3A+Cluster+5+%28Score%3A+2.667%29+default+edge.cytable" targetJoinKey="SUID" immutable="false"/>
        <virtualColumn name="shared name" sourceColumn="shared name" sourceTable="36-Pan_network_lfc1.txt/SHARED_ATTRS-org.cytoscape.model.CyNode-36+shared+node.cytable" sourceJoinKey="SUID" targetTable="40195-1%3A+Cluster+1+%28Score%3A+17.048%29/LOCAL_ATTRS-org.cytoscape.model.CyNode-1%3A+Cluster+1+%28Score%3A+17.048%29+default+node.cytable" targetJoinKey="SUID" immutable="false"/>
        <virtualColumn name="Chea3_Library" sourceColumn="Chea3_Library" sourceTable="36-Pan_network_lfc1.txt/SHARED_ATTRS-org.cytoscape.model.CyNode-36+shared+node.cytable" sourceJoinKey="SUID" targetTable="40195-1%3A+Cluster+1+%28Score%3A+17.048%29/LOCAL_ATTRS-org.cytoscape.model.CyNode-1%3A+Cluster+1+%28Score%3A+17.048%29+default+node.cytable" targetJoinKey="SUID" immutable="false"/>
        <virtualColumn name="Chea3_Overlapping_Genes" sourceColumn="Chea3_Overlapping_Genes" sourceTable="36-Pan_network_lfc1.txt/SHARED_ATTRS-org.cytoscape.model.CyNode-36+shared+node.cytable" sourceJoinKey="SUID" targetTable="40195-1%3A+Cluster+1+%28Score%3A+17.048%29/LOCAL_ATTRS-org.cytoscape.model.CyNode-1%3A+Cluster+1+%28Score%3A+17.048%29+default+node.cytable" targetJoinKey="SUID" immutable="false"/>
        <virtualColumn name="Chea3_Rank" sourceColumn="Chea3_Rank" sourceTable="36-Pan_network_lfc1.txt/SHARED_ATTRS-org.cytoscape.model.CyNode-36+shared+node.cytable" sourceJoinKey="SUID" targetTable="40195-1%3A+Cluster+1+%28Score%3A+17.048%29/LOCAL_ATTRS-org.cytoscape.model.CyNode-1%3A+Cluster+1+%28Score%3A+17.048%29+default+node.cytable" targetJoinKey="SUID" immutable="false"/>
        <virtualColumn name="chea3_Score" sourceColumn="chea3_Score" sourceTable="36-Pan_network_lfc1.txt/SHARED_ATTRS-org.cytoscape.model.CyNode-36+shared+node.cytable" sourceJoinKey="SUID" targetTable="40195-1%3A+Cluster+1+%28Score%3A+17.048%29/LOCAL_ATTRS-org.cytoscape.model.CyNode-1%3A+Cluster+1+%28Score%3A+17.048%29+default+node.cytable" targetJoinKey="SUID" immutable="false"/>
        <virtualColumn name="genesymbol" sourceColumn="genesymbol" sourceTable="36-Pan_network_lfc1.txt/SHARED_ATTRS-org.cytoscape.model.CyNode-36+shared+node.cytable" sourceJoinKey="SUID" targetTable="40195-1%3A+Cluster+1+%28Score%3A+17.048%29/LOCAL_ATTRS-org.cytoscape.model.CyNode-1%3A+Cluster+1+%28Score%3A+17.048%29+default+node.cytable" targetJoinKey="SUID" immutable="false"/>
        <virtualColumn name="isExcludedFromPaths" sourceColumn="isExcludedFromPaths" sourceTable="36-Pan_network_lfc1.txt/SHARED_ATTRS-org.cytoscape.model.CyNode-36+shared+node.cytable" sourceJoinKey="SUID" targetTable="40195-1%3A+Cluster+1+%28Score%3A+17.048%29/LOCAL_ATTRS-org.cytoscape.model.CyNode-1%3A+Cluster+1+%28Score%3A+17.048%29+default+node.cytable" targetJoinKey="SUID" immutable="false"/>
        <virtualColumn name="isInPath" sourceColumn="isInPath" sourceTable="36-Pan_network_lfc1.txt/SHARED_ATTRS-org.cytoscape.model.CyNode-36+shared+node.cytable" sourceJoinKey="SUID" targetTable="40195-1%3A+Cluster+1+%28Score%3A+17.048%29/LOCAL_ATTRS-org.cytoscape.model.CyNode-1%3A+Cluster+1+%28Score%3A+17.048%29+default+node.cytable" targetJoinKey="SUID" immutable="false"/>
        <virtualColumn name="Module_Color" sourceColumn="Module_Color" sourceTable="36-Pan_network_lfc1.txt/SHARED_ATTRS-org.cytoscape.model.CyNode-36+shared+node.cytable" sourceJoinKey="SUID" targetTable="40195-1%3A+Cluster+1+%28Score%3A+17.048%29/LOCAL_ATTRS-org.cytoscape.model.CyNode-1%3A+Cluster+1+%28Score%3A+17.048%29+default+node.cytable" targetJoinKey="SUID" immutable="false"/>
        <virtualColumn name="MCODE_Cluster" sourceColumn="MCODE_Cluster" sourceTable="36-Pan_network_lfc1.txt/SHARED_ATTRS-org.cytoscape.model.CyNode-36+shared+node.cytable" sourceJoinKey="SUID" targetTable="40195-1%3A+Cluster+1+%28Score%3A+17.048%29/LOCAL_ATTRS-org.cytoscape.model.CyNode-1%3A+Cluster+1+%28Score%3A+17.048%29+default+node.cytable" targetJoinKey="SUID" immutable="false"/>
        <virtualColumn name="MCODE_Node_Status" sourceColumn="MCODE_Node_Status" sourceTable="36-Pan_network_lfc1.txt/SHARED_ATTRS-org.cytoscape.model.CyNode-36+shared+node.cytable" sourceJoinKey="SUID" targetTable="40195-1%3A+Cluster+1+%28Score%3A+17.048%29/LOCAL_ATTRS-org.cytoscape.model.CyNode-1%3A+Cluster+1+%28Score%3A+17.048%29+default+node.cytable" targetJoinKey="SUID" immutable="false"/>
        <virtualColumn name="MCODE_Score" sourceColumn="MCODE_Score" sourceTable="36-Pan_network_lfc1.txt/SHARED_ATTRS-org.cytoscape.model.CyNode-36+shared+node.cytable" sourceJoinKey="SUID" targetTable="40195-1%3A+Cluster+1+%28Score%3A+17.048%29/LOCAL_ATTRS-org.cytoscape.model.CyNode-1%3A+Cluster+1+%28Score%3A+17.048%29+default+node.cytable" targetJoinKey="SUID" immutable="false"/>
        <virtualColumn name="shared name" sourceColumn="shared name" sourceTable="36-Pan_network_lfc1.txt/SHARED_ATTRS-org.cytoscape.model.CyEdge-36+shared+edge.cytable" sourceJoinKey="SUID" targetTable="40215-1%3A+Cluster+4+%28Score%3A+4.235%29/LOCAL_ATTRS-org.cytoscape.model.CyEdge-1%3A+Cluster+4+%28Score%3A+4.235%29+default+edge.cytable" targetJoinKey="SUID" immutable="false"/>
        <virtualColumn name="shared interaction" sourceColumn="shared interaction" sourceTable="36-Pan_network_lfc1.txt/SHARED_ATTRS-org.cytoscape.model.CyEdge-36+shared+edge.cytable" sourceJoinKey="SUID" targetTable="40215-1%3A+Cluster+4+%28Score%3A+4.235%29/LOCAL_ATTRS-org.cytoscape.model.CyEdge-1%3A+Cluster+4+%28Score%3A+4.235%29+default+edge.cytable" targetJoinKey="SUID" immutable="false"/>
        <virtualColumn name="isInPath" sourceColumn="isInPath" sourceTable="36-Pan_network_lfc1.txt/SHARED_ATTRS-org.cytoscape.model.CyEdge-36+shared+edge.cytable" sourceJoinKey="SUID" targetTable="40215-1%3A+Cluster+4+%28Score%3A+4.235%29/LOCAL_ATTRS-org.cytoscape.model.CyEdge-1%3A+Cluster+4+%28Score%3A+4.235%29+default+edge.cytable" targetJoinKey="SUID" immutable="false"/>
        <virtualColumn name="Module_Edge_Color" sourceColumn="Module_Edge_Color" sourceTable="36-Pan_network_lfc1.txt/SHARED_ATTRS-org.cytoscape.model.CyEdge-36+shared+edge.cytable" sourceJoinKey="SUID" targetTable="40215-1%3A+Cluster+4+%28Score%3A+4.235%29/LOCAL_ATTRS-org.cytoscape.model.CyEdge-1%3A+Cluster+4+%28Score%3A+4.235%29+default+edge.cytable" targetJoinKey="SUID" immutable="false"/>
        <virtualColumn name="shared name" sourceColumn="shared name" sourceTable="36-Pan_network_lfc1.txt/SHARED_ATTRS-org.cytoscape.model.CyNode-36+shared+node.cytable" sourceJoinKey="SUID" targetTable="40205-1%3A+Cluster+2+%28Score%3A+7.03%29/LOCAL_ATTRS-org.cytoscape.model.CyNode-1%3A+Cluster+2+%28Score%3A+7.03%29+default+node.cytable" targetJoinKey="SUID" immutable="false"/>
        <virtualColumn name="Chea3_Library" sourceColumn="Chea3_Library" sourceTable="36-Pan_network_lfc1.txt/SHARED_ATTRS-org.cytoscape.model.CyNode-36+shared+node.cytable" sourceJoinKey="SUID" targetTable="40205-1%3A+Cluster+2+%28Score%3A+7.03%29/LOCAL_ATTRS-org.cytoscape.model.CyNode-1%3A+Cluster+2+%28Score%3A+7.03%29+default+node.cytable" targetJoinKey="SUID" immutable="false"/>
        <virtualColumn name="Chea3_Overlapping_Genes" sourceColumn="Chea3_Overlapping_Genes" sourceTable="36-Pan_network_lfc1.txt/SHARED_ATTRS-org.cytoscape.model.CyNode-36+shared+node.cytable" sourceJoinKey="SUID" targetTable="40205-1%3A+Cluster+2+%28Score%3A+7.03%29/LOCAL_ATTRS-org.cytoscape.model.CyNode-1%3A+Cluster+2+%28Score%3A+7.03%29+default+node.cytable" targetJoinKey="SUID" immutable="false"/>
        <virtualColumn name="Chea3_Rank" sourceColumn="Chea3_Rank" sourceTable="36-Pan_network_lfc1.txt/SHARED_ATTRS-org.cytoscape.model.CyNode-36+shared+node.cytable" sourceJoinKey="SUID" targetTable="40205-1%3A+Cluster+2+%28Score%3A+7.03%29/LOCAL_ATTRS-org.cytoscape.model.CyNode-1%3A+Cluster+2+%28Score%3A+7.03%29+default+node.cytable" targetJoinKey="SUID" immutable="false"/>
        <virtualColumn name="chea3_Score" sourceColumn="chea3_Score" sourceTable="36-Pan_network_lfc1.txt/SHARED_ATTRS-org.cytoscape.model.CyNode-36+shared+node.cytable" sourceJoinKey="SUID" targetTable="40205-1%3A+Cluster+2+%28Score%3A+7.03%29/LOCAL_ATTRS-org.cytoscape.model.CyNode-1%3A+Cluster+2+%28Score%3A+7.03%29+default+node.cytable" targetJoinKey="SUID" immutable="false"/>
        <virtualColumn name="genesymbol" sourceColumn="genesymbol" sourceTable="36-Pan_network_lfc1.txt/SHARED_ATTRS-org.cytoscape.model.CyNode-36+shared+node.cytable" sourceJoinKey="SUID" targetTable="40205-1%3A+Cluster+2+%28Score%3A+7.03%29/LOCAL_ATTRS-org.cytoscape.model.CyNode-1%3A+Cluster+2+%28Score%3A+7.03%29+default+node.cytable" targetJoinKey="SUID" immutable="false"/>
        <virtualColumn name="isExcludedFromPaths" sourceColumn="isExcludedFromPaths" sourceTable="36-Pan_network_lfc1.txt/SHARED_ATTRS-org.cytoscape.model.CyNode-36+shared+node.cytable" sourceJoinKey="SUID" targetTable="40205-1%3A+Cluster+2+%28Score%3A+7.03%29/LOCAL_ATTRS-org.cytoscape.model.CyNode-1%3A+Cluster+2+%28Score%3A+7.03%29+default+node.cytable" targetJoinKey="SUID" immutable="false"/>
        <virtualColumn name="isInPath" sourceColumn="isInPath" sourceTable="36-Pan_network_lfc1.txt/SHARED_ATTRS-org.cytoscape.model.CyNode-36+shared+node.cytable" sourceJoinKey="SUID" targetTable="40205-1%3A+Cluster+2+%28Score%3A+7.03%29/LOCAL_ATTRS-org.cytoscape.model.CyNode-1%3A+Cluster+2+%28Score%3A+7.03%29+default+node.cytable" targetJoinKey="SUID" immutable="false"/>
        <virtualColumn name="Module_Color" sourceColumn="Module_Color" sourceTable="36-Pan_network_lfc1.txt/SHARED_ATTRS-org.cytoscape.model.CyNode-36+shared+node.cytable" sourceJoinKey="SUID" targetTable="40205-1%3A+Cluster+2+%28Score%3A+7.03%29/LOCAL_ATTRS-org.cytoscape.model.CyNode-1%3A+Cluster+2+%28Score%3A+7.03%29+default+node.cytable" targetJoinKey="SUID" immutable="false"/>
        <virtualColumn name="MCODE_Cluster" sourceColumn="MCODE_Cluster" sourceTable="36-Pan_network_lfc1.txt/SHARED_ATTRS-org.cytoscape.model.CyNode-36+shared+node.cytable" sourceJoinKey="SUID" targetTable="40205-1%3A+Cluster+2+%28Score%3A+7.03%29/LOCAL_ATTRS-org.cytoscape.model.CyNode-1%3A+Cluster+2+%28Score%3A+7.03%29+default+node.cytable" targetJoinKey="SUID" immutable="false"/>
        <virtualColumn name="MCODE_Node_Status" sourceColumn="MCODE_Node_Status" sourceTable="36-Pan_network_lfc1.txt/SHARED_ATTRS-org.cytoscape.model.CyNode-36+shared+node.cytable" sourceJoinKey="SUID" targetTable="40205-1%3A+Cluster+2+%28Score%3A+7.03%29/LOCAL_ATTRS-org.cytoscape.model.CyNode-1%3A+Cluster+2+%28Score%3A+7.03%29+default+node.cytable" targetJoinKey="SUID" immutable="false"/>
        <virtualColumn name="MCODE_Score" sourceColumn="MCODE_Score" sourceTable="36-Pan_network_lfc1.txt/SHARED_ATTRS-org.cytoscape.model.CyNode-36+shared+node.cytable" sourceJoinKey="SUID" targetTable="40205-1%3A+Cluster+2+%28Score%3A+7.03%29/LOCAL_ATTRS-org.cytoscape.model.CyNode-1%3A+Cluster+2+%28Score%3A+7.03%29+default+node.cytable" targetJoinKey="SUID" immutable="false"/>
        <virtualColumn name="shared name" sourceColumn="shared name" sourceTable="36-Pan_network_lfc1.txt/SHARED_ATTRS-org.cytoscape.model.CyNode-36+shared+node.cytable" sourceJoinKey="SUID" targetTable="52-52/LOCAL_ATTRS-org.cytoscape.model.CyNode-52+default+node.cytable" targetJoinKey="SUID" immutable="false"/>
        <virtualColumn name="isExcludedFromPaths" sourceColumn="isExcludedFromPaths" sourceTable="36-Pan_network_lfc1.txt/SHARED_ATTRS-org.cytoscape.model.CyNode-36+shared+node.cytable" sourceJoinKey="SUID" targetTable="52-52/LOCAL_ATTRS-org.cytoscape.model.CyNode-52+default+node.cytable" targetJoinKey="SUID" immutable="false"/>
        <virtualColumn name="isInPath" sourceColumn="isInPath" sourceTable="36-Pan_network_lfc1.txt/SHARED_ATTRS-org.cytoscape.model.CyNode-36+shared+node.cytable" sourceJoinKey="SUID" targetTable="52-52/LOCAL_ATTRS-org.cytoscape.model.CyNode-52+default+node.cytable" targetJoinKey="SUID" immutable="false"/>
        <virtualColumn name="Module_Color" sourceColumn="Module_Color" sourceTable="36-Pan_network_lfc1.txt/SHARED_ATTRS-org.cytoscape.model.CyNode-36+shared+node.cytable" sourceJoinKey="SUID" targetTable="52-52/LOCAL_ATTRS-org.cytoscape.model.CyNode-52+default+node.cytable" targetJoinKey="SUID" immutable="false"/>
        <virtualColumn name="genesymbol" sourceColumn="genesymbol" sourceTable="36-Pan_network_lfc1.txt/SHARED_ATTRS-org.cytoscape.model.CyNode-36+shared+node.cytable" sourceJoinKey="SUID" targetTable="52-52/LOCAL_ATTRS-org.cytoscape.model.CyNode-52+default+node.cytable" targetJoinKey="SUID" immutable="false"/>
        <virtualColumn name="Chea3_Rank" sourceColumn="Chea3_Rank" sourceTable="36-Pan_network_lfc1.txt/SHARED_ATTRS-org.cytoscape.model.CyNode-36+shared+node.cytable" sourceJoinKey="SUID" targetTable="52-52/LOCAL_ATTRS-org.cytoscape.model.CyNode-52+default+node.cytable" targetJoinKey="SUID" immutable="false"/>
        <virtualColumn name="chea3_Score" sourceColumn="chea3_Score" sourceTable="36-Pan_network_lfc1.txt/SHARED_ATTRS-org.cytoscape.model.CyNode-36+shared+node.cytable" sourceJoinKey="SUID" targetTable="52-52/LOCAL_ATTRS-org.cytoscape.model.CyNode-52+default+node.cytable" targetJoinKey="SUID" immutable="false"/>
        <virtualColumn name="Chea3_Library" sourceColumn="Chea3_Library" sourceTable="36-Pan_network_lfc1.txt/SHARED_ATTRS-org.cytoscape.model.CyNode-36+shared+node.cytable" sourceJoinKey="SUID" targetTable="52-52/LOCAL_ATTRS-org.cytoscape.model.CyNode-52+default+node.cytable" targetJoinKey="SUID" immutable="false"/>
        <virtualColumn name="Chea3_Overlapping_Genes" sourceColumn="Chea3_Overlapping_Genes" sourceTable="36-Pan_network_lfc1.txt/SHARED_ATTRS-org.cytoscape.model.CyNode-36+shared+node.cytable" sourceJoinKey="SUID" targetTable="52-52/LOCAL_ATTRS-org.cytoscape.model.CyNode-52+default+node.cytable" targetJoinKey="SUID" immutable="false"/>
        <virtualColumn name="MCODE_Cluster" sourceColumn="MCODE_Cluster" sourceTable="36-Pan_network_lfc1.txt/SHARED_ATTRS-org.cytoscape.model.CyNode-36+shared+node.cytable" sourceJoinKey="SUID" targetTable="52-52/LOCAL_ATTRS-org.cytoscape.model.CyNode-52+default+node.cytable" targetJoinKey="SUID" immutable="false"/>
        <virtualColumn name="MCODE_Node_Status" sourceColumn="MCODE_Node_Status" sourceTable="36-Pan_network_lfc1.txt/SHARED_ATTRS-org.cytoscape.model.CyNode-36+shared+node.cytable" sourceJoinKey="SUID" targetTable="52-52/LOCAL_ATTRS-org.cytoscape.model.CyNode-52+default+node.cytable" targetJoinKey="SUID" immutable="false"/>
        <virtualColumn name="MCODE_Score" sourceColumn="MCODE_Score" sourceTable="36-Pan_network_lfc1.txt/SHARED_ATTRS-org.cytoscape.model.CyNode-36+shared+node.cytable" sourceJoinKey="SUID" targetTable="52-52/LOCAL_ATTRS-org.cytoscape.model.CyNode-52+default+node.cytable" targetJoinKey="SUID" immutable="false"/>
        <virtualColumn name="shared name" sourceColumn="shared name" sourceTable="36-Pan_network_lfc1.txt/SHARED_ATTRS-org.cytoscape.model.CyNetwork-36+shared+network.cytable" sourceJoinKey="SUID" targetTable="40215-1%3A+Cluster+4+%28Score%3A+4.235%29/LOCAL_ATTRS-org.cytoscape.model.CyNetwork-1%3A+Cluster+4+%28Score%3A+4.235%29+default+network.cytable" targetJoinKey="SUID" immutable="false"/>
        <virtualColumn name="shared name" sourceColumn="shared name" sourceTable="36-Pan_network_lfc1.txt/SHARED_ATTRS-org.cytoscape.model.CyEdge-36+shared+edge.cytable" sourceJoinKey="SUID" targetTable="62-Pan_network_lfc1.txt/LOCAL_ATTRS-org.cytoscape.model.CyEdge-Pan_network_lfc1.txt+default+edge.cytable" targetJoinKey="SUID" immutable="false"/>
        <virtualColumn name="shared interaction" sourceColumn="shared interaction" sourceTable="36-Pan_network_lfc1.txt/SHARED_ATTRS-org.cytoscape.model.CyEdge-36+shared+edge.cytable" sourceJoinKey="SUID" targetTable="62-Pan_network_lfc1.txt/LOCAL_ATTRS-org.cytoscape.model.CyEdge-Pan_network_lfc1.txt+default+edge.cytable" targetJoinKey="SUID" immutable="false"/>
        <virtualColumn name="isInPath" sourceColumn="isInPath" sourceTable="36-Pan_network_lfc1.txt/SHARED_ATTRS-org.cytoscape.model.CyEdge-36+shared+edge.cytable" sourceJoinKey="SUID" targetTable="62-Pan_network_lfc1.txt/LOCAL_ATTRS-org.cytoscape.model.CyEdge-Pan_network_lfc1.txt+default+edge.cytable" targetJoinKey="SUID" immutable="false"/>
        <virtualColumn name="Module_Edge_Color" sourceColumn="Module_Edge_Color" sourceTable="36-Pan_network_lfc1.txt/SHARED_ATTRS-org.cytoscape.model.CyEdge-36+shared+edge.cytable" sourceJoinKey="SUID" targetTable="62-Pan_network_lfc1.txt/LOCAL_ATTRS-org.cytoscape.model.CyEdge-Pan_network_lfc1.txt+default+edge.cytable" targetJoinKey="SUID" immutable="false"/>
        <virtualColumn name="shared name" sourceColumn="shared name" sourceTable="36-Pan_network_lfc1.txt/SHARED_ATTRS-org.cytoscape.model.CyNetwork-36+shared+network.cytable" sourceJoinKey="SUID" targetTable="62-Pan_network_lfc1.txt/LOCAL_ATTRS-org.cytoscape.model.CyNetwork-Pan_network_lfc1.txt+default+network.cytable" targetJoinKey="SUID" immutable="false"/>
        <virtualColumn name="shared name" sourceColumn="shared name" sourceTable="36-Pan_network_lfc1.txt/SHARED_ATTRS-org.cytoscape.model.CyEdge-36+shared+edge.cytable" sourceJoinKey="SUID" targetTable="40235-1%3A+Cluster+3+%28Score%3A+6.145%29/LOCAL_ATTRS-org.cytoscape.model.CyEdge-1%3A+Cluster+3+%28Score%3A+6.145%29+default+edge.cytable" targetJoinKey="SUID" immutable="false"/>
        <virtualColumn name="shared interaction" sourceColumn="shared interaction" sourceTable="36-Pan_network_lfc1.txt/SHARED_ATTRS-org.cytoscape.model.CyEdge-36+shared+edge.cytable" sourceJoinKey="SUID" targetTable="40235-1%3A+Cluster+3+%28Score%3A+6.145%29/LOCAL_ATTRS-org.cytoscape.model.CyEdge-1%3A+Cluster+3+%28Score%3A+6.145%29+default+edge.cytable" targetJoinKey="SUID" immutable="false"/>
        <virtualColumn name="isInPath" sourceColumn="isInPath" sourceTable="36-Pan_network_lfc1.txt/SHARED_ATTRS-org.cytoscape.model.CyEdge-36+shared+edge.cytable" sourceJoinKey="SUID" targetTable="40235-1%3A+Cluster+3+%28Score%3A+6.145%29/LOCAL_ATTRS-org.cytoscape.model.CyEdge-1%3A+Cluster+3+%28Score%3A+6.145%29+default+edge.cytable" targetJoinKey="SUID" immutable="false"/>
        <virtualColumn name="Module_Edge_Color" sourceColumn="Module_Edge_Color" sourceTable="36-Pan_network_lfc1.txt/SHARED_ATTRS-org.cytoscape.model.CyEdge-36+shared+edge.cytable" sourceJoinKey="SUID" targetTable="40235-1%3A+Cluster+3+%28Score%3A+6.145%29/LOCAL_ATTRS-org.cytoscape.model.CyEdge-1%3A+Cluster+3+%28Score%3A+6.145%29+default+edge.cytable" targetJoinKey="SUID" immutable="false"/>
        <virtualColumn name="shared name" sourceColumn="shared name" sourceTable="36-Pan_network_lfc1.txt/SHARED_ATTRS-org.cytoscape.model.CyNode-36+shared+node.cytable" sourceJoinKey="SUID" targetTable="36-Pan_network_lfc1.txt/LOCAL_ATTRS-org.cytoscape.model.CyNode-36+default+node.cytable" targetJoinKey="SUID" immutable="false"/>
        <virtualColumn name="isExcludedFromPaths" sourceColumn="isExcludedFromPaths" sourceTable="36-Pan_network_lfc1.txt/SHARED_ATTRS-org.cytoscape.model.CyNode-36+shared+node.cytable" sourceJoinKey="SUID" targetTable="36-Pan_network_lfc1.txt/LOCAL_ATTRS-org.cytoscape.model.CyNode-36+default+node.cytable" targetJoinKey="SUID" immutable="false"/>
        <virtualColumn name="isInPath" sourceColumn="isInPath" sourceTable="36-Pan_network_lfc1.txt/SHARED_ATTRS-org.cytoscape.model.CyNode-36+shared+node.cytable" sourceJoinKey="SUID" targetTable="36-Pan_network_lfc1.txt/LOCAL_ATTRS-org.cytoscape.model.CyNode-36+default+node.cytable" targetJoinKey="SUID" immutable="false"/>
        <virtualColumn name="Module_Color" sourceColumn="Module_Color" sourceTable="36-Pan_network_lfc1.txt/SHARED_ATTRS-org.cytoscape.model.CyNode-36+shared+node.cytable" sourceJoinKey="SUID" targetTable="36-Pan_network_lfc1.txt/LOCAL_ATTRS-org.cytoscape.model.CyNode-36+default+node.cytable" targetJoinKey="SUID" immutable="false"/>
        <virtualColumn name="genesymbol" sourceColumn="genesymbol" sourceTable="36-Pan_network_lfc1.txt/SHARED_ATTRS-org.cytoscape.model.CyNode-36+shared+node.cytable" sourceJoinKey="SUID" targetTable="36-Pan_network_lfc1.txt/LOCAL_ATTRS-org.cytoscape.model.CyNode-36+default+node.cytable" targetJoinKey="SUID" immutable="false"/>
        <virtualColumn name="Chea3_Rank" sourceColumn="Chea3_Rank" sourceTable="36-Pan_network_lfc1.txt/SHARED_ATTRS-org.cytoscape.model.CyNode-36+shared+node.cytable" sourceJoinKey="SUID" targetTable="36-Pan_network_lfc1.txt/LOCAL_ATTRS-org.cytoscape.model.CyNode-36+default+node.cytable" targetJoinKey="SUID" immutable="false"/>
        <virtualColumn name="chea3_Score" sourceColumn="chea3_Score" sourceTable="36-Pan_network_lfc1.txt/SHARED_ATTRS-org.cytoscape.model.CyNode-36+shared+node.cytable" sourceJoinKey="SUID" targetTable="36-Pan_network_lfc1.txt/LOCAL_ATTRS-org.cytoscape.model.CyNode-36+default+node.cytable" targetJoinKey="SUID" immutable="false"/>
        <virtualColumn name="Chea3_Library" sourceColumn="Chea3_Library" sourceTable="36-Pan_network_lfc1.txt/SHARED_ATTRS-org.cytoscape.model.CyNode-36+shared+node.cytable" sourceJoinKey="SUID" targetTable="36-Pan_network_lfc1.txt/LOCAL_ATTRS-org.cytoscape.model.CyNode-36+default+node.cytable" targetJoinKey="SUID" immutable="false"/>
        <virtualColumn name="Chea3_Overlapping_Genes" sourceColumn="Chea3_Overlapping_Genes" sourceTable="36-Pan_network_lfc1.txt/SHARED_ATTRS-org.cytoscape.model.CyNode-36+shared+node.cytable" sourceJoinKey="SUID" targetTable="36-Pan_network_lfc1.txt/LOCAL_ATTRS-org.cytoscape.model.CyNode-36+default+node.cytable" targetJoinKey="SUID" immutable="false"/>
        <virtualColumn name="MCODE_Cluster" sourceColumn="MCODE_Cluster" sourceTable="36-Pan_network_lfc1.txt/SHARED_ATTRS-org.cytoscape.model.CyNode-36+shared+node.cytable" sourceJoinKey="SUID" targetTable="36-Pan_network_lfc1.txt/LOCAL_ATTRS-org.cytoscape.model.CyNode-36+default+node.cytable" targetJoinKey="SUID" immutable="false"/>
        <virtualColumn name="MCODE_Node_Status" sourceColumn="MCODE_Node_Status" sourceTable="36-Pan_network_lfc1.txt/SHARED_ATTRS-org.cytoscape.model.CyNode-36+shared+node.cytable" sourceJoinKey="SUID" targetTable="36-Pan_network_lfc1.txt/LOCAL_ATTRS-org.cytoscape.model.CyNode-36+default+node.cytable" targetJoinKey="SUID" immutable="false"/>
        <virtualColumn name="MCODE_Score" sourceColumn="MCODE_Score" sourceTable="36-Pan_network_lfc1.txt/SHARED_ATTRS-org.cytoscape.model.CyNode-36+shared+node.cytable" sourceJoinKey="SUID" targetTable="36-Pan_network_lfc1.txt/LOCAL_ATTRS-org.cytoscape.model.CyNode-36+default+node.cytable" targetJoinKey="SUID" immutable="false"/>
        <virtualColumn name="shared name" sourceColumn="shared name" sourceTable="36-Pan_network_lfc1.txt/SHARED_ATTRS-org.cytoscape.model.CyNode-36+shared+node.cytable" sourceJoinKey="SUID" targetTable="40235-1%3A+Cluster+3+%28Score%3A+6.145%29/LOCAL_ATTRS-org.cytoscape.model.CyNode-1%3A+Cluster+3+%28Score%3A+6.145%29+default+node.cytable" targetJoinKey="SUID" immutable="false"/>
        <virtualColumn name="Chea3_Library" sourceColumn="Chea3_Library" sourceTable="36-Pan_network_lfc1.txt/SHARED_ATTRS-org.cytoscape.model.CyNode-36+shared+node.cytable" sourceJoinKey="SUID" targetTable="40235-1%3A+Cluster+3+%28Score%3A+6.145%29/LOCAL_ATTRS-org.cytoscape.model.CyNode-1%3A+Cluster+3+%28Score%3A+6.145%29+default+node.cytable" targetJoinKey="SUID" immutable="false"/>
        <virtualColumn name="Chea3_Overlapping_Genes" sourceColumn="Chea3_Overlapping_Genes" sourceTable="36-Pan_network_lfc1.txt/SHARED_ATTRS-org.cytoscape.model.CyNode-36+shared+node.cytable" sourceJoinKey="SUID" targetTable="40235-1%3A+Cluster+3+%28Score%3A+6.145%29/LOCAL_ATTRS-org.cytoscape.model.CyNode-1%3A+Cluster+3+%28Score%3A+6.145%29+default+node.cytable" targetJoinKey="SUID" immutable="false"/>
        <virtualColumn name="Chea3_Rank" sourceColumn="Chea3_Rank" sourceTable="36-Pan_network_lfc1.txt/SHARED_ATTRS-org.cytoscape.model.CyNode-36+shared+node.cytable" sourceJoinKey="SUID" targetTable="40235-1%3A+Cluster+3+%28Score%3A+6.145%29/LOCAL_ATTRS-org.cytoscape.model.CyNode-1%3A+Cluster+3+%28Score%3A+6.145%29+default+node.cytable" targetJoinKey="SUID" immutable="false"/>
        <virtualColumn name="chea3_Score" sourceColumn="chea3_Score" sourceTable="36-Pan_network_lfc1.txt/SHARED_ATTRS-org.cytoscape.model.CyNode-36+shared+node.cytable" sourceJoinKey="SUID" targetTable="40235-1%3A+Cluster+3+%28Score%3A+6.145%29/LOCAL_ATTRS-org.cytoscape.model.CyNode-1%3A+Cluster+3+%28Score%3A+6.145%29+default+node.cytable" targetJoinKey="SUID" immutable="false"/>
        <virtualColumn name="genesymbol" sourceColumn="genesymbol" sourceTable="36-Pan_network_lfc1.txt/SHARED_ATTRS-org.cytoscape.model.CyNode-36+shared+node.cytable" sourceJoinKey="SUID" targetTable="40235-1%3A+Cluster+3+%28Score%3A+6.145%29/LOCAL_ATTRS-org.cytoscape.model.CyNode-1%3A+Cluster+3+%28Score%3A+6.145%29+default+node.cytable" targetJoinKey="SUID" immutable="false"/>
        <virtualColumn name="isExcludedFromPaths" sourceColumn="isExcludedFromPaths" sourceTable="36-Pan_network_lfc1.txt/SHARED_ATTRS-org.cytoscape.model.CyNode-36+shared+node.cytable" sourceJoinKey="SUID" targetTable="40235-1%3A+Cluster+3+%28Score%3A+6.145%29/LOCAL_ATTRS-org.cytoscape.model.CyNode-1%3A+Cluster+3+%28Score%3A+6.145%29+default+node.cytable" targetJoinKey="SUID" immutable="false"/>
        <virtualColumn name="isInPath" sourceColumn="isInPath" sourceTable="36-Pan_network_lfc1.txt/SHARED_ATTRS-org.cytoscape.model.CyNode-36+shared+node.cytable" sourceJoinKey="SUID" targetTable="40235-1%3A+Cluster+3+%28Score%3A+6.145%29/LOCAL_ATTRS-org.cytoscape.model.CyNode-1%3A+Cluster+3+%28Score%3A+6.145%29+default+node.cytable" targetJoinKey="SUID" immutable="false"/>
        <virtualColumn name="Module_Color" sourceColumn="Module_Color" sourceTable="36-Pan_network_lfc1.txt/SHARED_ATTRS-org.cytoscape.model.CyNode-36+shared+node.cytable" sourceJoinKey="SUID" targetTable="40235-1%3A+Cluster+3+%28Score%3A+6.145%29/LOCAL_ATTRS-org.cytoscape.model.CyNode-1%3A+Cluster+3+%28Score%3A+6.145%29+default+node.cytable" targetJoinKey="SUID" immutable="false"/>
        <virtualColumn name="MCODE_Cluster" sourceColumn="MCODE_Cluster" sourceTable="36-Pan_network_lfc1.txt/SHARED_ATTRS-org.cytoscape.model.CyNode-36+shared+node.cytable" sourceJoinKey="SUID" targetTable="40235-1%3A+Cluster+3+%28Score%3A+6.145%29/LOCAL_ATTRS-org.cytoscape.model.CyNode-1%3A+Cluster+3+%28Score%3A+6.145%29+default+node.cytable" targetJoinKey="SUID" immutable="false"/>
        <virtualColumn name="MCODE_Node_Status" sourceColumn="MCODE_Node_Status" sourceTable="36-Pan_network_lfc1.txt/SHARED_ATTRS-org.cytoscape.model.CyNode-36+shared+node.cytable" sourceJoinKey="SUID" targetTable="40235-1%3A+Cluster+3+%28Score%3A+6.145%29/LOCAL_ATTRS-org.cytoscape.model.CyNode-1%3A+Cluster+3+%28Score%3A+6.145%29+default+node.cytable" targetJoinKey="SUID" immutable="false"/>
        <virtualColumn name="MCODE_Score" sourceColumn="MCODE_Score" sourceTable="36-Pan_network_lfc1.txt/SHARED_ATTRS-org.cytoscape.model.CyNode-36+shared+node.cytable" sourceJoinKey="SUID" targetTable="40235-1%3A+Cluster+3+%28Score%3A+6.145%29/LOCAL_ATTRS-org.cytoscape.model.CyNode-1%3A+Cluster+3+%28Score%3A+6.145%29+default+node.cytable" targetJoinKey="SUID" immutable="false"/>
        <virtualColumn name="shared name" sourceColumn="shared name" sourceTable="36-Pan_network_lfc1.txt/SHARED_ATTRS-org.cytoscape.model.CyEdge-36+shared+edge.cytable" sourceJoinKey="SUID" targetTable="40205-1%3A+Cluster+2+%28Score%3A+7.03%29/LOCAL_ATTRS-org.cytoscape.model.CyEdge-1%3A+Cluster+2+%28Score%3A+7.03%29+default+edge.cytable" targetJoinKey="SUID" immutable="false"/>
        <virtualColumn name="shared interaction" sourceColumn="shared interaction" sourceTable="36-Pan_network_lfc1.txt/SHARED_ATTRS-org.cytoscape.model.CyEdge-36+shared+edge.cytable" sourceJoinKey="SUID" targetTable="40205-1%3A+Cluster+2+%28Score%3A+7.03%29/LOCAL_ATTRS-org.cytoscape.model.CyEdge-1%3A+Cluster+2+%28Score%3A+7.03%29+default+edge.cytable" targetJoinKey="SUID" immutable="false"/>
        <virtualColumn name="isInPath" sourceColumn="isInPath" sourceTable="36-Pan_network_lfc1.txt/SHARED_ATTRS-org.cytoscape.model.CyEdge-36+shared+edge.cytable" sourceJoinKey="SUID" targetTable="40205-1%3A+Cluster+2+%28Score%3A+7.03%29/LOCAL_ATTRS-org.cytoscape.model.CyEdge-1%3A+Cluster+2+%28Score%3A+7.03%29+default+edge.cytable" targetJoinKey="SUID" immutable="false"/>
        <virtualColumn name="Module_Edge_Color" sourceColumn="Module_Edge_Color" sourceTable="36-Pan_network_lfc1.txt/SHARED_ATTRS-org.cytoscape.model.CyEdge-36+shared+edge.cytable" sourceJoinKey="SUID" targetTable="40205-1%3A+Cluster+2+%28Score%3A+7.03%29/LOCAL_ATTRS-org.cytoscape.model.CyEdge-1%3A+Cluster+2+%28Score%3A+7.03%29+default+edge.cytable" targetJoinKey="SUID" immutable="false"/>
        <virtualColumn name="shared name" sourceColumn="shared name" sourceTable="36-Pan_network_lfc1.txt/SHARED_ATTRS-org.cytoscape.model.CyNode-36+shared+node.cytable" sourceJoinKey="SUID" targetTable="62-Pan_network_lfc1.txt/LOCAL_ATTRS-org.cytoscape.model.CyNode-Pan_network_lfc1.txt+default+node.cytable" targetJoinKey="SUID" immutable="false"/>
        <virtualColumn name="isExcludedFromPaths" sourceColumn="isExcludedFromPaths" sourceTable="36-Pan_network_lfc1.txt/SHARED_ATTRS-org.cytoscape.model.CyNode-36+shared+node.cytable" sourceJoinKey="SUID" targetTable="62-Pan_network_lfc1.txt/LOCAL_ATTRS-org.cytoscape.model.CyNode-Pan_network_lfc1.txt+default+node.cytable" targetJoinKey="SUID" immutable="false"/>
        <virtualColumn name="isInPath" sourceColumn="isInPath" sourceTable="36-Pan_network_lfc1.txt/SHARED_ATTRS-org.cytoscape.model.CyNode-36+shared+node.cytable" sourceJoinKey="SUID" targetTable="62-Pan_network_lfc1.txt/LOCAL_ATTRS-org.cytoscape.model.CyNode-Pan_network_lfc1.txt+default+node.cytable" targetJoinKey="SUID" immutable="false"/>
        <virtualColumn name="Module_Color" sourceColumn="Module_Color" sourceTable="36-Pan_network_lfc1.txt/SHARED_ATTRS-org.cytoscape.model.CyNode-36+shared+node.cytable" sourceJoinKey="SUID" targetTable="62-Pan_network_lfc1.txt/LOCAL_ATTRS-org.cytoscape.model.CyNode-Pan_network_lfc1.txt+default+node.cytable" targetJoinKey="SUID" immutable="false"/>
        <virtualColumn name="genesymbol" sourceColumn="genesymbol" sourceTable="36-Pan_network_lfc1.txt/SHARED_ATTRS-org.cytoscape.model.CyNode-36+shared+node.cytable" sourceJoinKey="SUID" targetTable="62-Pan_network_lfc1.txt/LOCAL_ATTRS-org.cytoscape.model.CyNode-Pan_network_lfc1.txt+default+node.cytable" targetJoinKey="SUID" immutable="false"/>
        <virtualColumn name="Chea3_Rank" sourceColumn="Chea3_Rank" sourceTable="36-Pan_network_lfc1.txt/SHARED_ATTRS-org.cytoscape.model.CyNode-36+shared+node.cytable" sourceJoinKey="SUID" targetTable="62-Pan_network_lfc1.txt/LOCAL_ATTRS-org.cytoscape.model.CyNode-Pan_network_lfc1.txt+default+node.cytable" targetJoinKey="SUID" immutable="false"/>
        <virtualColumn name="chea3_Score" sourceColumn="chea3_Score" sourceTable="36-Pan_network_lfc1.txt/SHARED_ATTRS-org.cytoscape.model.CyNode-36+shared+node.cytable" sourceJoinKey="SUID" targetTable="62-Pan_network_lfc1.txt/LOCAL_ATTRS-org.cytoscape.model.CyNode-Pan_network_lfc1.txt+default+node.cytable" targetJoinKey="SUID" immutable="false"/>
        <virtualColumn name="Chea3_Library" sourceColumn="Chea3_Library" sourceTable="36-Pan_network_lfc1.txt/SHARED_ATTRS-org.cytoscape.model.CyNode-36+shared+node.cytable" sourceJoinKey="SUID" targetTable="62-Pan_network_lfc1.txt/LOCAL_ATTRS-org.cytoscape.model.CyNode-Pan_network_lfc1.txt+default+node.cytable" targetJoinKey="SUID" immutable="false"/>
        <virtualColumn name="Chea3_Overlapping_Genes" sourceColumn="Chea3_Overlapping_Genes" sourceTable="36-Pan_network_lfc1.txt/SHARED_ATTRS-org.cytoscape.model.CyNode-36+shared+node.cytable" sourceJoinKey="SUID" targetTable="62-Pan_network_lfc1.txt/LOCAL_ATTRS-org.cytoscape.model.CyNode-Pan_network_lfc1.txt+default+node.cytable" targetJoinKey="SUID" immutable="false"/>
        <virtualColumn name="MCODE_Cluster" sourceColumn="MCODE_Cluster" sourceTable="36-Pan_network_lfc1.txt/SHARED_ATTRS-org.cytoscape.model.CyNode-36+shared+node.cytable" sourceJoinKey="SUID" targetTable="62-Pan_network_lfc1.txt/LOCAL_ATTRS-org.cytoscape.model.CyNode-Pan_network_lfc1.txt+default+node.cytable" targetJoinKey="SUID" immutable="false"/>
        <virtualColumn name="MCODE_Node_Status" sourceColumn="MCODE_Node_Status" sourceTable="36-Pan_network_lfc1.txt/SHARED_ATTRS-org.cytoscape.model.CyNode-36+shared+node.cytable" sourceJoinKey="SUID" targetTable="62-Pan_network_lfc1.txt/LOCAL_ATTRS-org.cytoscape.model.CyNode-Pan_network_lfc1.txt+default+node.cytable" targetJoinKey="SUID" immutable="false"/>
        <virtualColumn name="MCODE_Score" sourceColumn="MCODE_Score" sourceTable="36-Pan_network_lfc1.txt/SHARED_ATTRS-org.cytoscape.model.CyNode-36+shared+node.cytable" sourceJoinKey="SUID" targetTable="62-Pan_network_lfc1.txt/LOCAL_ATTRS-org.cytoscape.model.CyNode-Pan_network_lfc1.txt+default+node.cytable" targetJoinKey="SUID" immutable="false"/>
        <virtualColumn name="shared name" sourceColumn="shared name" sourceTable="36-Pan_network_lfc1.txt/SHARED_ATTRS-org.cytoscape.model.CyNetwork-36+shared+network.cytable" sourceJoinKey="SUID" targetTable="40235-1%3A+Cluster+3+%28Score%3A+6.145%29/LOCAL_ATTRS-org.cytoscape.model.CyNetwork-1%3A+Cluster+3+%28Score%3A+6.145%29+default+network.cytable" targetJoinKey="SUID" immutable="false"/>
        <virtualColumn name="shared name" sourceColumn="shared name" sourceTable="36-Pan_network_lfc1.txt/SHARED_ATTRS-org.cytoscape.model.CyEdge-36+shared+edge.cytable" sourceJoinKey="SUID" targetTable="40195-1%3A+Cluster+1+%28Score%3A+17.048%29/LOCAL_ATTRS-org.cytoscape.model.CyEdge-1%3A+Cluster+1+%28Score%3A+17.048%29+default+edge.cytable" targetJoinKey="SUID" immutable="false"/>
        <virtualColumn name="shared interaction" sourceColumn="shared interaction" sourceTable="36-Pan_network_lfc1.txt/SHARED_ATTRS-org.cytoscape.model.CyEdge-36+shared+edge.cytable" sourceJoinKey="SUID" targetTable="40195-1%3A+Cluster+1+%28Score%3A+17.048%29/LOCAL_ATTRS-org.cytoscape.model.CyEdge-1%3A+Cluster+1+%28Score%3A+17.048%29+default+edge.cytable" targetJoinKey="SUID" immutable="false"/>
        <virtualColumn name="isInPath" sourceColumn="isInPath" sourceTable="36-Pan_network_lfc1.txt/SHARED_ATTRS-org.cytoscape.model.CyEdge-36+shared+edge.cytable" sourceJoinKey="SUID" targetTable="40195-1%3A+Cluster+1+%28Score%3A+17.048%29/LOCAL_ATTRS-org.cytoscape.model.CyEdge-1%3A+Cluster+1+%28Score%3A+17.048%29+default+edge.cytable" targetJoinKey="SUID" immutable="false"/>
        <virtualColumn name="Module_Edge_Color" sourceColumn="Module_Edge_Color" sourceTable="36-Pan_network_lfc1.txt/SHARED_ATTRS-org.cytoscape.model.CyEdge-36+shared+edge.cytable" sourceJoinKey="SUID" targetTable="40195-1%3A+Cluster+1+%28Score%3A+17.048%29/LOCAL_ATTRS-org.cytoscape.model.CyEdge-1%3A+Cluster+1+%28Score%3A+17.048%29+default+edge.cytable" targetJoinKey="SUID" immutable="false"/>
        <virtualColumn name="shared name" sourceColumn="shared name" sourceTable="36-Pan_network_lfc1.txt/SHARED_ATTRS-org.cytoscape.model.CyNetwork-36+shared+network.cytable" sourceJoinKey="SUID" targetTable="36-Pan_network_lfc1.txt/LOCAL_ATTRS-org.cytoscape.model.CyNetwork-36+default+network.cytable" targetJoinKey="SUID" immutable="false"/>
    </virtualColumns>
</cyTables>
