# Supplementary material for: Regulatory network analysis of Paneth cell and goblet cell enriched gut organoids using transcriptomics approaches
Source: Royal Society of Chemistry journal article supplement (doi:10.1039/c9mo00130a), 2019-12-10
Supplement: c9mo00130a1.cys [file c9mo00130a1.cys › CytoscapeSession-2019_09_26-22_01/tables/global/40289-EnrichmentMap.Model.1.cytable]

"CyCSV-Version","1"
"ID","Model.JSON","Network.SUID"
"java.lang.Integer","java.lang.String","java.lang.Long"
"","",""
"EnrichmentMap.Model.1","mutable"
