# Supplementary material for: Regulatory network analysis of Paneth cell and goblet cell enriched gut organoids using transcriptomics approaches
Source: Royal Society of Chemistry journal article supplement (doi:10.1039/c9mo00130a), 2019-12-10
Supplement: c9mo00130a1.cys [file c9mo00130a1.cys › CytoscapeSession-2019_09_26-22_01/views/62-43285-Pan_network_lfc1.txt.xgmml]

<?xml version="1.0" encoding="UTF-8" standalone="yes"?>
<graph id="43285" label="Pan_network_lfc1.txt" cy:view="1" cy:networkId="62" cy:visualStyle="default" cy:rendererId="org.cytoscape.ding" cy:documentVersion="3.0" xmlns:dc="http://purl.org/dc/elements/1.1/" xmlns:xlink="http://www.w3.org/1999/xlink" xmlns:rdf="http://www.w3.org/1999/02/22-rdf-syntax-ns#" xmlns:cy="http://www.cytoscape.org" xmlns="http://www.cs.rpi.edu/XGMML">
  <graphics>
    <att name="NETWORK_CENTER_X_LOCATION" value="-49.053802490234375" type="string" cy:type="String"/>
    <att name="NETWORK_SCALE_FACTOR" value="0.2505149830251558" type="string" cy:type="String"/>
    <att name="NETWORK_NODE_SELECTION" value="true" type="string" cy:type="String"/>
    <att name="NETWORK_TITLE" value="Pan_network_lfc1.txt" type="string" cy:type="String"/>
    <att name="NETWORK_HEIGHT" value="510.0" type="string" cy:type="String"/>
    <att name="NETWORK_CENTER_Z_LOCATION" value="0.0" type="string" cy:type="String"/>
    <att name="NETWORK_EDGE_SELECTION" value="true" type="string" cy:type="String"/>
    <att name="NETWORK_DEPTH" value="0.0" type="string" cy:type="String"/>
    <att name="NETWORK_CENTER_Y_LOCATION" value="-73.3486328125" type="string" cy:type="String"/>
    <att name="NETWORK_WIDTH" value="658.0" type="string" cy:type="String"/>
    <att name="NETWORK_ANNOTATION_SELECTION" value="false" type="string" cy:type="String"/>
  </graphics>
  <node id="46347" label="ENSMUSG00000010175" cy:nodeId="72">
    <graphics z="0.0" y="1.4296576342758271" x="-382.9689591868723">
      <att name="lockedVisualProperties" type="list" cy:type="List">
        <att name="NODE_LABEL" value="" type="string" cy:type="String"/>
      </att>
    </graphics>
  </node>
  <node id="46346" label="ENSMUSG00000029275" cy:nodeId="73">
    <graphics z="0.0" y="-182.4016488232437" x="-535.1903947337473">
      <att name="lockedVisualProperties" type="list" cy:type="List">
        <att name="NODE_LABEL" value="" type="string" cy:type="String"/>
      </att>
    </graphics>
  </node>
  <node id="46345" label="ENSMUSG00000015846" cy:nodeId="74">
    <graphics z="0.0" y="49.71366184570161" x="37.2339521900808">
      <att name="lockedVisualProperties" type="list" cy:type="List">
        <att name="NODE_LABEL" value="" type="string" cy:type="String"/>
      </att>
    </graphics>
  </node>
  <node id="46344" label="ENSMUSG00000021779" cy:nodeId="75">
    <graphics z="0.0" y="-121.35185176513824" x="-60.91788801988014">
      <att name="lockedVisualProperties" type="list" cy:type="List">
        <att name="NODE_LABEL" value="" type="string" cy:type="String"/>
      </att>
    </graphics>
  </node>
  <node id="46343" label="ENSMUSG00000022383" cy:nodeId="76">
    <graphics z="0.0" y="38.861893352049265" x="23.5429121510183">
      <att name="lockedVisualProperties" type="list" cy:type="List">
        <att name="NODE_LABEL" value="" type="string" cy:type="String"/>
      </att>
    </graphics>
  </node>
  <node id="46342" label="ENSMUSG00000022479" cy:nodeId="77">
    <graphics z="0.0" y="50.09722202636567" x="-0.805278156598888">
      <att name="lockedVisualProperties" type="list" cy:type="List">
        <att name="NODE_LABEL" value="" type="string" cy:type="String"/>
      </att>
    </graphics>
  </node>
  <node id="46341" label="ENSMUSG00000022809" cy:nodeId="78">
    <graphics z="0.0" y="11.561249431150827" x="-2.3867143138254505">
      <att name="lockedVisualProperties" type="list" cy:type="List">
        <att name="NODE_LABEL" value="" type="string" cy:type="String"/>
      </att>
    </graphics>
  </node>
  <node id="46340" label="ENSMUSG00000024431" cy:nodeId="79">
    <graphics z="0.0" y="46.121971782225046" x="20.15430131117455">
      <att name="lockedVisualProperties" type="list" cy:type="List">
        <att name="NODE_LABEL" value="" type="string" cy:type="String"/>
      </att>
    </graphics>
  </node>
  <node id="46339" label="ENSMUSG00000058756" cy:nodeId="80">
    <graphics z="0.0" y="14.675598796385202" x="10.6209150807058">
      <att name="lockedVisualProperties" type="list" cy:type="List">
        <att name="NODE_LABEL" value="" type="string" cy:type="String"/>
      </att>
    </graphics>
  </node>
  <node id="46338" label="ENSMUSG00000017950" cy:nodeId="81">
    <graphics z="0.0" y="72.33451145507661" x="33.10939469496361">
      <att name="lockedVisualProperties" type="list" cy:type="List">
        <att name="NODE_LABEL" value="" type="string" cy:type="String"/>
      </att>
    </graphics>
  </node>
  <node id="46337" label="ENSMUSG00000029167" cy:nodeId="82">
    <graphics z="0.0" y="184.10520237304536" x="-73.2155107005442">
      <att name="lockedVisualProperties" type="list" cy:type="List">
        <att name="NODE_LABEL" value="" type="string" cy:type="String"/>
      </att>
    </graphics>
  </node>
  <node id="46336" label="ENSMUSG00000037583" cy:nodeId="83">
    <graphics z="0.0" y="-12.20153934143218" x="-64.55628523667701">
      <att name="lockedVisualProperties" type="list" cy:type="List">
        <att name="NODE_LABEL" value="" type="string" cy:type="String"/>
      </att>
    </graphics>
  </node>
  <node id="46335" label="ENSMUSG00000018501" cy:nodeId="84">
    <graphics z="0.0" y="49.50204532958833" x="17.8694502369558">
      <att name="lockedVisualProperties" type="list" cy:type="List">
        <att name="NODE_LABEL" value="" type="string" cy:type="String"/>
      </att>
    </graphics>
  </node>
  <node id="46334" label="ENSMUSG00000020889" cy:nodeId="85">
    <graphics z="0.0" y="43.71178501464692" x="23.321522380510487">
      <att name="lockedVisualProperties" type="list" cy:type="List">
        <att name="NODE_LABEL" value="" type="string" cy:type="String"/>
      </att>
    </graphics>
  </node>
  <node id="46333" label="ENSMUSG00000018899" cy:nodeId="86">
    <graphics z="0.0" y="40.68364780761567" x="6.9664656178151745">
      <att name="lockedVisualProperties" type="list" cy:type="List">
        <att name="NODE_LABEL" value="" type="string" cy:type="String"/>
      </att>
    </graphics>
  </node>
  <node id="46332" label="ENSMUSG00000020184" cy:nodeId="87">
    <graphics z="0.0" y="55.87754124023286" x="175.20430913130394">
      <att name="lockedVisualProperties" type="list" cy:type="List">
        <att name="NODE_LABEL" value="" type="string" cy:type="String"/>
      </att>
    </graphics>
  </node>
  <node id="46331" label="ENSMUSG00000039236" cy:nodeId="88">
    <graphics z="0.0" y="96.14868992187348" x="399.2057234303152">
      <att name="lockedVisualProperties" type="list" cy:type="List">
        <att name="NODE_LABEL" value="" type="string" cy:type="String"/>
      </att>
    </graphics>
  </node>
  <node id="46330" label="ENSMUSG00000022105" cy:nodeId="89">
    <graphics z="0.0" y="101.22148960449067" x="116.8450132862722">
      <att name="lockedVisualProperties" type="list" cy:type="List">
        <att name="NODE_LABEL" value="" type="string" cy:type="String"/>
      </att>
    </graphics>
  </node>
  <node id="46329" label="ENSMUSG00000052684" cy:nodeId="90">
    <graphics z="0.0" y="56.544571574705515" x="9.787220622697987">
      <att name="lockedVisualProperties" type="list" cy:type="List">
        <att name="NODE_LABEL" value="" type="string" cy:type="String"/>
      </att>
    </graphics>
  </node>
  <node id="46328" label="ENSMUSG00000015568" cy:nodeId="91">
    <graphics z="0.0" y="24.034004863279733" x="223.17648377577416">
      <att name="lockedVisualProperties" type="list" cy:type="List">
        <att name="NODE_LABEL" value="" type="string" cy:type="String"/>
      </att>
    </graphics>
  </node>
  <node id="46327" label="ENSMUSG00000054422" cy:nodeId="92">
    <graphics z="0.0" y="244.56899326660005" x="117.19231095472924">
      <att name="lockedVisualProperties" type="list" cy:type="List">
        <att name="NODE_LABEL" value="" type="string" cy:type="String"/>
      </att>
    </graphics>
  </node>
  <node id="46326" label="ENSMUSG00000027695" cy:nodeId="93">
    <graphics z="0.0" y="24.70708530761567" x="-118.14535078843483">
      <att name="lockedVisualProperties" type="list" cy:type="List">
        <att name="NODE_LABEL" value="" type="string" cy:type="String"/>
      </att>
    </graphics>
  </node>
  <node id="46325" label="ENSMUSG00000024912" cy:nodeId="94">
    <graphics z="0.0" y="34.995133098143015" x="-5.391276691755138">
      <att name="lockedVisualProperties" type="list" cy:type="List">
        <att name="NODE_LABEL" value="" type="string" cy:type="String"/>
      </att>
    </graphics>
  </node>
  <node id="46324" label="ENSMUSG00000027168" cy:nodeId="95">
    <graphics z="0.0" y="80.38229435302583" x="9.1445967213308">
      <att name="lockedVisualProperties" type="list" cy:type="List">
        <att name="NODE_LABEL" value="" type="string" cy:type="String"/>
      </att>
    </graphics>
  </node>
  <node id="46323" label="ENSMUSG00000020455" cy:nodeId="96">
    <graphics z="0.0" y="-35.026096645814505" x="-409.8905290110911">
      <att name="lockedVisualProperties" type="list" cy:type="List">
        <att name="NODE_LABEL" value="" type="string" cy:type="String"/>
      </att>
    </graphics>
  </node>
  <node id="46322" label="ENSMUSG00000027210" cy:nodeId="97">
    <graphics z="0.0" y="-395.0867074169937" x="-424.8594621165598">
      <att name="lockedVisualProperties" type="list" cy:type="List">
        <att name="NODE_LABEL" value="" type="string" cy:type="String"/>
      </att>
    </graphics>
  </node>
  <node id="46321" label="ENSMUSG00000027985" cy:nodeId="98">
    <graphics z="0.0" y="-15.454287830812063" x="-533.3837541087473">
      <att name="lockedVisualProperties" type="list" cy:type="List">
        <att name="NODE_LABEL" value="" type="string" cy:type="String"/>
      </att>
    </graphics>
  </node>
  <node id="46320" label="ENSMUSG00000035158" cy:nodeId="99">
    <graphics z="0.0" y="51.597611125486765" x="-9.616542194684826">
      <att name="lockedVisualProperties" type="list" cy:type="List">
        <att name="NODE_LABEL" value="" type="string" cy:type="String"/>
      </att>
    </graphics>
  </node>
  <node id="46319" label="ENSMUSG00000034771" cy:nodeId="100">
    <graphics z="0.0" y="401.42168491699067" x="511.3655439869558">
      <att name="lockedVisualProperties" type="list" cy:type="List">
        <att name="NODE_LABEL" value="" type="string" cy:type="String"/>
      </att>
    </graphics>
  </node>
  <node id="46318" label="ENSMUSG00000022528" cy:nodeId="101">
    <graphics z="0.0" y="30.274658854978952" x="45.583531047502674">
      <att name="lockedVisualProperties" type="list" cy:type="List">
        <att name="NODE_LABEL" value="" type="string" cy:type="String"/>
      </att>
    </graphics>
  </node>
  <node id="46317" label="ENSMUSG00000034957" cy:nodeId="102">
    <graphics z="0.0" y="61.75571506835786" x="28.454319621721424">
      <att name="lockedVisualProperties" type="list" cy:type="List">
        <att name="NODE_LABEL" value="" type="string" cy:type="String"/>
      </att>
    </graphics>
  </node>
  <node id="46316" label="ENSMUSG00000069515" cy:nodeId="103">
    <graphics z="0.0" y="224.8843619189438" x="15.444294597307362">
      <att name="lockedVisualProperties" type="list" cy:type="List">
        <att name="NODE_LABEL" value="" type="string" cy:type="String"/>
      </att>
    </graphics>
  </node>
  <node id="46315" label="ENSMUSG00000037032" cy:nodeId="104">
    <graphics z="0.0" y="389.9727713427719" x="254.69489731947533">
      <att name="lockedVisualProperties" type="list" cy:type="List">
        <att name="NODE_LABEL" value="" type="string" cy:type="String"/>
      </att>
    </graphics>
  </node>
  <node id="46314" label="ENSMUSG00000040249" cy:nodeId="105">
    <graphics z="0.0" y="120.82177036620942" x="5.439655925432362">
      <att name="lockedVisualProperties" type="list" cy:type="List">
        <att name="NODE_LABEL" value="" type="string" cy:type="String"/>
      </att>
    </graphics>
  </node>
  <node id="46313" label="ENSMUSG00000026398" cy:nodeId="106">
    <graphics z="0.0" y="27.993290599363718" x="33.03429093519799">
      <att name="lockedVisualProperties" type="list" cy:type="List">
        <att name="NODE_LABEL" value="" type="string" cy:type="String"/>
      </att>
    </graphics>
  </node>
  <node id="46312" label="ENSMUSG00000018909" cy:nodeId="107">
    <graphics z="0.0" y="-120.16753322265777" x="255.22381272474877">
      <att name="lockedVisualProperties" type="list" cy:type="List">
        <att name="NODE_LABEL" value="" type="string" cy:type="String"/>
      </att>
    </graphics>
  </node>
  <node id="46311" label="ENSMUSG00000027544" cy:nodeId="108">
    <graphics z="0.0" y="79.02449100829926" x="60.15712418715111">
      <att name="lockedVisualProperties" type="list" cy:type="List">
        <att name="NODE_LABEL" value="" type="string" cy:type="String"/>
      </att>
    </graphics>
  </node>
  <node id="46310" label="ENSMUSG00000032035" cy:nodeId="109">
    <graphics z="0.0" y="49.80722874023286" x="31.743626262346424">
      <att name="lockedVisualProperties" type="list" cy:type="List">
        <att name="NODE_LABEL" value="" type="string" cy:type="String"/>
      </att>
    </graphics>
  </node>
  <node id="46309" label="ENSMUSG00000032487" cy:nodeId="110">
    <graphics z="0.0" y="-236.45250636718902" x="-22.669444416364513">
      <att name="lockedVisualProperties" type="list" cy:type="List">
        <att name="NODE_LABEL" value="" type="string" cy:type="String"/>
      </att>
    </graphics>
  </node>
  <node id="46308" label="ENSMUSG00000053007" cy:nodeId="111">
    <graphics z="0.0" y="143.31115024902192" x="178.7746073261892">
      <att name="lockedVisualProperties" type="list" cy:type="List">
        <att name="NODE_LABEL" value="" type="string" cy:type="String"/>
      </att>
    </graphics>
  </node>
  <node id="46307" label="ENSMUSG00000055639" cy:nodeId="112">
    <graphics z="0.0" y="268.72063511230317" x="-216.23556074937233">
      <att name="lockedVisualProperties" type="list" cy:type="List">
        <att name="NODE_LABEL" value="" type="string" cy:type="String"/>
      </att>
    </graphics>
  </node>
  <node id="46306" label="ENSMUSG00000000567" cy:nodeId="113">
    <graphics z="0.0" y="41.62558811523286" x="28.753025676408924">
      <att name="lockedVisualProperties" type="list" cy:type="List">
        <att name="NODE_LABEL" value="" type="string" cy:type="String"/>
      </att>
    </graphics>
  </node>
  <node id="46305" label="ENSMUSG00000000056" cy:nodeId="114">
    <graphics z="0.0" y="-133.35793239257964" x="64.91062607924096">
      <att name="lockedVisualProperties" type="list" cy:type="List">
        <att name="NODE_LABEL" value="" type="string" cy:type="String"/>
      </att>
    </graphics>
  </node>
  <node id="46304" label="ENSMUSG00000000126" cy:nodeId="115">
    <graphics z="0.0" y="342.9874197802719" x="-98.21544966538795">
      <att name="lockedVisualProperties" type="list" cy:type="List">
        <att name="NODE_LABEL" value="" type="string" cy:type="String"/>
      </att>
    </graphics>
  </node>
  <node id="46303" label="ENSMUSG00000000214" cy:nodeId="116">
    <graphics z="0.0" y="188.56154697753755" x="72.86226334730736">
      <att name="lockedVisualProperties" type="list" cy:type="List">
        <att name="NODE_LABEL" value="" type="string" cy:type="String"/>
      </att>
    </graphics>
  </node>
  <node id="46302" label="ENSMUSG00000000308" cy:nodeId="117">
    <graphics z="0.0" y="285.8405386767563" x="1.4041792408620495">
      <att name="lockedVisualProperties" type="list" cy:type="List">
        <att name="NODE_LABEL" value="" type="string" cy:type="String"/>
      </att>
    </graphics>
  </node>
  <node id="46301" label="ENSMUSG00000000394" cy:nodeId="118">
    <graphics z="0.0" y="1.0717779956039521" x="155.42785134474389">
      <att name="lockedVisualProperties" type="list" cy:type="List">
        <att name="NODE_LABEL" value="" type="string" cy:type="String"/>
      </att>
    </graphics>
  </node>
  <node id="46300" label="ENSMUSG00000000555" cy:nodeId="119">
    <graphics z="0.0" y="83.17913120605317" x="-109.7463944896067">
      <att name="lockedVisualProperties" type="list" cy:type="List">
        <att name="NODE_LABEL" value="" type="string" cy:type="String"/>
      </att>
    </graphics>
  </node>
  <node id="46299" label="ENSMUSG00000001039" cy:nodeId="120">
    <graphics z="0.0" y="500.9926382861313" x="325.32393326918236">
      <att name="lockedVisualProperties" type="list" cy:type="List">
        <att name="NODE_LABEL" value="" type="string" cy:type="String"/>
      </att>
    </graphics>
  </node>
  <node id="46298" label="ENSMUSG00000001119" cy:nodeId="121">
    <graphics z="0.0" y="104.29381626464692" x="460.3800398365652">
      <att name="lockedVisualProperties" type="list" cy:type="List">
        <att name="NODE_LABEL" value="" type="string" cy:type="String"/>
      </att>
    </graphics>
  </node>
  <node id="46297" label="ENSMUSG00000001120" cy:nodeId="122">
    <graphics z="0.0" y="-87.35732967041167" x="366.0727736012136">
      <att name="lockedVisualProperties" type="list" cy:type="List">
        <att name="NODE_LABEL" value="" type="string" cy:type="String"/>
      </att>
    </graphics>
  </node>
  <node id="46296" label="ENSMUSG00000001281" cy:nodeId="123">
    <graphics z="0.0" y="-61.07608539245757" x="57.17688431898705">
      <att name="lockedVisualProperties" type="list" cy:type="List">
        <att name="NODE_LABEL" value="" type="string" cy:type="String"/>
      </att>
    </graphics>
  </node>
  <node id="46295" label="ENSMUSG00000001435" cy:nodeId="124">
    <graphics z="0.0" y="-117.33714229248199" x="46.28931107679955">
      <att name="lockedVisualProperties" type="list" cy:type="List">
        <att name="NODE_LABEL" value="" type="string" cy:type="String"/>
      </att>
    </graphics>
  </node>
  <node id="46294" label="ENSMUSG00000001473" cy:nodeId="125">
    <graphics z="0.0" y="-96.64459544799956" x="128.29549088636986">
      <att name="lockedVisualProperties" type="list" cy:type="List">
        <att name="NODE_LABEL" value="" type="string" cy:type="String"/>
      </att>
    </graphics>
  </node>
  <node id="46293" label="ENSMUSG00000001761" cy:nodeId="126">
    <graphics z="0.0" y="-215.99443751953277" x="-174.21691450913795">
      <att name="lockedVisualProperties" type="list" cy:type="List">
        <att name="NODE_LABEL" value="" type="string" cy:type="String"/>
      </att>
    </graphics>
  </node>
  <node id="46292" label="ENSMUSG00000001864" cy:nodeId="127">
    <graphics z="0.0" y="-85.86088496826324" x="321.1933027760183">
      <att name="lockedVisualProperties" type="list" cy:type="List">
        <att name="NODE_LABEL" value="" type="string" cy:type="String"/>
      </att>
    </graphics>
  </node>
  <node id="46291" label="ENSMUSG00000002565" cy:nodeId="128">
    <graphics z="0.0" y="239.46874302245942" x="-150.85293135484108">
      <att name="lockedVisualProperties" type="list" cy:type="List">
        <att name="NODE_LABEL" value="" type="string" cy:type="String"/>
      </att>
    </graphics>
  </node>
  <node id="46290" label="ENSMUSG00000002625" cy:nodeId="129">
    <graphics z="0.0" y="-17.2546876110855" x="424.4356428639089">
      <att name="lockedVisualProperties" type="list" cy:type="List">
        <att name="NODE_LABEL" value="" type="string" cy:type="String"/>
      </att>
    </graphics>
  </node>
  <node id="46289" label="ENSMUSG00000002799" cy:nodeId="130">
    <graphics z="0.0" y="306.5795523486313" x="248.1792418018972">
      <att name="lockedVisualProperties" type="list" cy:type="List">
        <att name="NODE_LABEL" value="" type="string" cy:type="String"/>
      </att>
    </graphics>
  </node>
  <node id="46288" label="ENSMUSG00000003134" cy:nodeId="131">
    <graphics z="0.0" y="390.01567905761567" x="183.29974904219262">
      <att name="lockedVisualProperties" type="list" cy:type="List">
        <att name="NODE_LABEL" value="" type="string" cy:type="String"/>
      </att>
    </graphics>
  </node>
  <node id="46287" label="ENSMUSG00000003380" cy:nodeId="132">
    <graphics z="0.0" y="-13.442958179933157" x="82.92834916273705">
      <att name="lockedVisualProperties" type="list" cy:type="List">
        <att name="NODE_LABEL" value="" type="string" cy:type="String"/>
      </att>
    </graphics>
  </node>
  <node id="46286" label="ENSMUSG00000003420" cy:nodeId="133">
    <graphics z="0.0" y="-248.37737208984527" x="17.271381999651112">
      <att name="lockedVisualProperties" type="list" cy:type="List">
        <att name="NODE_LABEL" value="" type="string" cy:type="String"/>
      </att>
    </graphics>
  </node>
  <node id="46285" label="ENSMUSG00000003469" cy:nodeId="134">
    <graphics z="0.0" y="-14.862225834352103" x="-197.48314986070045">
      <att name="lockedVisualProperties" type="list" cy:type="List">
        <att name="NODE_LABEL" value="" type="string" cy:type="String"/>
      </att>
    </graphics>
  </node>
  <node id="46284" label="ENSMUSG00000003541" cy:nodeId="135">
    <graphics z="0.0" y="31.696671184080515" x="178.72746339003197">
      <att name="lockedVisualProperties" type="list" cy:type="List">
        <att name="NODE_LABEL" value="" type="string" cy:type="String"/>
      </att>
    </graphics>
  </node>
  <node id="46283" label="ENSMUSG00000003545" cy:nodeId="136">
    <graphics z="0.0" y="79.65803593017426" x="22.832844401994862">
      <att name="lockedVisualProperties" type="list" cy:type="List">
        <att name="NODE_LABEL" value="" type="string" cy:type="String"/>
      </att>
    </graphics>
  </node>
  <node id="46282" label="ENSMUSG00000003949" cy:nodeId="137">
    <graphics z="0.0" y="52.717117961424265" x="109.23265519301049">
      <att name="lockedVisualProperties" type="list" cy:type="List">
        <att name="NODE_LABEL" value="" type="string" cy:type="String"/>
      </att>
    </graphics>
  </node>
  <node id="46281" label="ENSMUSG00000004044" cy:nodeId="138">
    <graphics z="0.0" y="151.38092869140473" x="-20.666362140973888">
      <att name="lockedVisualProperties" type="list" cy:type="List">
        <att name="NODE_LABEL" value="" type="string" cy:type="String"/>
      </att>
    </graphics>
  </node>
  <node id="46280" label="ENSMUSG00000004270" cy:nodeId="139">
    <graphics z="0.0" y="10.929886516111765" x="124.66060700575463">
      <att name="lockedVisualProperties" type="list" cy:type="List">
        <att name="NODE_LABEL" value="" type="string" cy:type="String"/>
      </att>
    </graphics>
  </node>
  <node id="46279" label="ENSMUSG00000004328" cy:nodeId="140">
    <graphics z="0.0" y="55.70751255370942" x="-134.6191972239817">
      <att name="lockedVisualProperties" type="list" cy:type="List">
        <att name="NODE_LABEL" value="" type="string" cy:type="String"/>
      </att>
    </graphics>
  </node>
  <node id="46278" label="ENSMUSG00000004768" cy:nodeId="141">
    <graphics z="0.0" y="168.71059482910005" x="-100.54812178452858">
      <att name="lockedVisualProperties" type="list" cy:type="List">
        <att name="NODE_LABEL" value="" type="string" cy:type="String"/>
      </att>
    </graphics>
  </node>
  <node id="46277" label="ENSMUSG00000004789" cy:nodeId="142">
    <graphics z="0.0" y="-171.23094875000152" x="88.17595353285424">
      <att name="lockedVisualProperties" type="list" cy:type="List">
        <att name="NODE_LABEL" value="" type="string" cy:type="String"/>
      </att>
    </graphics>
  </node>
  <node id="46276" label="ENSMUSG00000004864" cy:nodeId="143">
    <graphics z="0.0" y="300.2176138720688" x="119.33255448500267">
      <att name="lockedVisualProperties" type="list" cy:type="List">
        <att name="NODE_LABEL" value="" type="string" cy:type="String"/>
      </att>
    </graphics>
  </node>
  <node id="46275" label="ENSMUSG00000004951" cy:nodeId="144">
    <graphics z="0.0" y="74.95173710204926" x="234.2091604725515">
      <att name="lockedVisualProperties" type="list" cy:type="List">
        <att name="NODE_LABEL" value="" type="string" cy:type="String"/>
      </att>
    </graphics>
  </node>
  <node id="46274" label="ENSMUSG00000005107" cy:nodeId="145">
    <graphics z="0.0" y="-139.27146083496245" x="38.61958756605736">
      <att name="lockedVisualProperties" type="list" cy:type="List">
        <att name="NODE_LABEL" value="" type="string" cy:type="String"/>
      </att>
    </graphics>
  </node>
  <node id="46273" label="ENSMUSG00000005320" cy:nodeId="146">
    <graphics z="0.0" y="-83.94129497192534" x="-254.4131425364817">
      <att name="lockedVisualProperties" type="list" cy:type="List">
        <att name="NODE_LABEL" value="" type="string" cy:type="String"/>
      </att>
    </graphics>
  </node>
  <node id="46272" label="ENSMUSG00000005360" cy:nodeId="147">
    <graphics z="0.0" y="104.07190769531098" x="-257.5933488353098">
      <att name="lockedVisualProperties" type="list" cy:type="List">
        <att name="NODE_LABEL" value="" type="string" cy:type="String"/>
      </att>
    </graphics>
  </node>
  <node id="46271" label="ENSMUSG00000005413" cy:nodeId="148">
    <graphics z="0.0" y="15.078926738279733" x="-149.6928056224192">
      <att name="lockedVisualProperties" type="list" cy:type="List">
        <att name="NODE_LABEL" value="" type="string" cy:type="String"/>
      </att>
    </graphics>
  </node>
  <node id="46270" label="ENSMUSG00000005611" cy:nodeId="149">
    <graphics z="0.0" y="-76.48556453369292" x="-310.44237837632545">
      <att name="lockedVisualProperties" type="list" cy:type="List">
        <att name="NODE_LABEL" value="" type="string" cy:type="String"/>
      </att>
    </graphics>
  </node>
  <node id="46269" label="ENSMUSG00000005873" cy:nodeId="150">
    <graphics z="0.0" y="197.05613010742036" x="86.66203751722924">
      <att name="lockedVisualProperties" type="list" cy:type="List">
        <att name="NODE_LABEL" value="" type="string" cy:type="String"/>
      </att>
    </graphics>
  </node>
  <node id="46268" label="ENSMUSG00000005958" cy:nodeId="151">
    <graphics z="0.0" y="105.49781101562348" x="-65.72643599351295">
      <att name="lockedVisualProperties" type="list" cy:type="List">
        <att name="NODE_LABEL" value="" type="string" cy:type="String"/>
      </att>
    </graphics>
  </node>
  <node id="46267" label="ENSMUSG00000005973" cy:nodeId="152">
    <graphics z="0.0" y="158.29473179199067" x="-39.752101276716076">
      <att name="lockedVisualProperties" type="list" cy:type="List">
        <att name="NODE_LABEL" value="" type="string" cy:type="String"/>
      </att>
    </graphics>
  </node>
  <node id="46266" label="ENSMUSG00000005986" cy:nodeId="153">
    <graphics z="0.0" y="176.9488913378891" x="-36.28771529038795">
      <att name="lockedVisualProperties" type="list" cy:type="List">
        <att name="NODE_LABEL" value="" type="string" cy:type="String"/>
      </att>
    </graphics>
  </node>
  <node id="46265" label="ENSMUSG00000006345" cy:nodeId="154">
    <graphics z="0.0" y="-166.77861720703277" x="-329.5885575755442">
      <att name="lockedVisualProperties" type="list" cy:type="List">
        <att name="NODE_LABEL" value="" type="string" cy:type="String"/>
      </att>
    </graphics>
  </node>
  <node id="46264" label="ENSMUSG00000006435" cy:nodeId="155">
    <graphics z="0.0" y="56.83818882324067" x="-173.01659712632545">
      <att name="lockedVisualProperties" type="list" cy:type="List">
        <att name="NODE_LABEL" value="" type="string" cy:type="String"/>
      </att>
    </graphics>
  </node>
  <node id="46263" label="ENSMUSG00000006463" cy:nodeId="156">
    <graphics z="0.0" y="-275.14504176757964" x="236.8450132862722">
      <att name="lockedVisualProperties" type="list" cy:type="List">
        <att name="NODE_LABEL" value="" type="string" cy:type="String"/>
      </att>
    </graphics>
  </node>
  <node id="46262" label="ENSMUSG00000006464" cy:nodeId="157">
    <graphics z="0.0" y="419.7632986865219" x="-186.87215742905983">
      <att name="lockedVisualProperties" type="list" cy:type="List">
        <att name="NODE_LABEL" value="" type="string" cy:type="String"/>
      </att>
    </graphics>
  </node>
  <node id="46261" label="ENSMUSG00000006642" cy:nodeId="158">
    <graphics z="0.0" y="-7.2707856335464385" x="-143.7181962474192">
      <att name="lockedVisualProperties" type="list" cy:type="List">
        <att name="NODE_LABEL" value="" type="string" cy:type="String"/>
      </att>
    </graphics>
  </node>
  <node id="46260" label="ENSMUSG00000006731" cy:nodeId="159">
    <graphics z="0.0" y="-37.65546542785796" x="-23.588511799177013">
      <att name="lockedVisualProperties" type="list" cy:type="List">
        <att name="NODE_LABEL" value="" type="string" cy:type="String"/>
      </att>
    </graphics>
  </node>
  <node id="46259" label="ENSMUSG00000006930" cy:nodeId="160">
    <graphics z="0.0" y="438.3097769580063" x="100.38145890394799">
      <att name="lockedVisualProperties" type="list" cy:type="List">
        <att name="NODE_LABEL" value="" type="string" cy:type="String"/>
      </att>
    </graphics>
  </node>
  <node id="46258" label="ENSMUSG00000007888" cy:nodeId="161">
    <graphics z="0.0" y="399.8215262255844" x="-75.22007307847389">
      <att name="lockedVisualProperties" type="list" cy:type="List">
        <att name="NODE_LABEL" value="" type="string" cy:type="String"/>
      </att>
    </graphics>
  </node>
  <node id="46257" label="ENSMUSG00000007989" cy:nodeId="162">
    <graphics z="0.0" y="-256.1085274853531" x="129.05682053724877">
      <att name="lockedVisualProperties" type="list" cy:type="List">
        <att name="NODE_LABEL" value="" type="string" cy:type="String"/>
      </att>
    </graphics>
  </node>
  <node id="46256" label="ENSMUSG00000008090" cy:nodeId="163">
    <graphics z="0.0" y="-54.49358302734527" x="105.15845170179955">
      <att name="lockedVisualProperties" type="list" cy:type="List">
        <att name="NODE_LABEL" value="" type="string" cy:type="String"/>
      </att>
    </graphics>
  </node>
  <node id="46255" label="ENSMUSG00000008734" cy:nodeId="164">
    <graphics z="0.0" y="27.555016215818796" x="-21.390025471052013">
      <att name="lockedVisualProperties" type="list" cy:type="List">
        <att name="NODE_LABEL" value="" type="string" cy:type="String"/>
      </att>
    </graphics>
  </node>
  <node id="46254" label="ENSMUSG00000009739" cy:nodeId="165">
    <graphics z="0.0" y="52.577599223631296" x="45.437779094377674">
      <att name="lockedVisualProperties" type="list" cy:type="List">
        <att name="NODE_LABEL" value="" type="string" cy:type="String"/>
      </att>
    </graphics>
  </node>
  <node id="46253" label="ENSMUSG00000009863" cy:nodeId="166">
    <graphics z="0.0" y="315.4263846240219" x="-151.84862837632545">
      <att name="lockedVisualProperties" type="list" cy:type="List">
        <att name="NODE_LABEL" value="" type="string" cy:type="String"/>
      </att>
    </graphics>
  </node>
  <node id="46252" label="ENSMUSG00000010362" cy:nodeId="167">
    <graphics z="0.0" y="-150.79206020019683" x="-303.0707658274973">
      <att name="lockedVisualProperties" type="list" cy:type="List">
        <att name="NODE_LABEL" value="" type="string" cy:type="String"/>
      </att>
    </graphics>
  </node>
  <node id="46251" label="ENSMUSG00000010830" cy:nodeId="168">
    <graphics z="0.0" y="-143.92463618896636" x="207.3996244923269">
      <att name="lockedVisualProperties" type="list" cy:type="List">
        <att name="NODE_LABEL" value="" type="string" cy:type="String"/>
      </att>
    </graphics>
  </node>
  <node id="46250" label="ENSMUSG00000011148" cy:nodeId="169">
    <graphics z="0.0" y="63.24071567870942" x="174.73711171309105">
      <att name="lockedVisualProperties" type="list" cy:type="List">
        <att name="NODE_LABEL" value="" type="string" cy:type="String"/>
      </att>
    </graphics>
  </node>
  <node id="46249" label="ENSMUSG00000011752" cy:nodeId="170">
    <graphics z="0.0" y="-88.3819955029312" x="-52.46056685288795">
      <att name="lockedVisualProperties" type="list" cy:type="List">
        <att name="NODE_LABEL" value="" type="string" cy:type="String"/>
      </att>
    </graphics>
  </node>
  <node id="46248" label="ENSMUSG00000012017" cy:nodeId="171">
    <graphics z="0.0" y="95.6745230517563" x="452.2988935963308">
      <att name="lockedVisualProperties" type="list" cy:type="List">
        <att name="NODE_LABEL" value="" type="string" cy:type="String"/>
      </att>
    </graphics>
  </node>
  <node id="46247" label="ENSMUSG00000012126" cy:nodeId="172">
    <graphics z="0.0" y="-4.06361323974761" x="-159.78152022202858">
      <att name="lockedVisualProperties" type="list" cy:type="List">
        <att name="NODE_LABEL" value="" type="string" cy:type="String"/>
      </att>
    </graphics>
  </node>
  <node id="46246" label="ENSMUSG00000013089" cy:nodeId="173">
    <graphics z="0.0" y="35.740563090818796" x="175.66109719435326">
      <att name="lockedVisualProperties" type="list" cy:type="List">
        <att name="NODE_LABEL" value="" type="string" cy:type="String"/>
      </att>
    </graphics>
  </node>
  <node id="46245" label="ENSMUSG00000013846" cy:nodeId="174">
    <graphics z="0.0" y="136.57439487792817" x="-243.34157881577858">
      <att name="lockedVisualProperties" type="list" cy:type="List">
        <att name="NODE_LABEL" value="" type="string" cy:type="String"/>
      </att>
    </graphics>
  </node>
  <node id="46244" label="ENSMUSG00000014303" cy:nodeId="175">
    <graphics z="0.0" y="51.84307163574067" x="-124.3700517161692">
      <att name="lockedVisualProperties" type="list" cy:type="List">
        <att name="NODE_LABEL" value="" type="string" cy:type="String"/>
      </att>
    </graphics>
  </node>
  <node id="46243" label="ENSMUSG00000014351" cy:nodeId="176">
    <graphics z="0.0" y="-18.06686145446929" x="-61.7443192942942">
      <att name="lockedVisualProperties" type="list" cy:type="List">
        <att name="NODE_LABEL" value="" type="string" cy:type="String"/>
      </att>
    </graphics>
  </node>
  <node id="46242" label="ENSMUSG00000014361" cy:nodeId="177">
    <graphics z="0.0" y="114.67981785156098" x="11.19629349867455">
      <att name="lockedVisualProperties" type="list" cy:type="List">
        <att name="NODE_LABEL" value="" type="string" cy:type="String"/>
      </att>
    </graphics>
  </node>
  <node id="46241" label="ENSMUSG00000014602" cy:nodeId="178">
    <graphics z="0.0" y="-21.220628086549368" x="81.0528990284597">
      <att name="lockedVisualProperties" type="list" cy:type="List">
        <att name="NODE_LABEL" value="" type="string" cy:type="String"/>
      </att>
    </graphics>
  </node>
  <node id="46240" label="ENSMUSG00000015112" cy:nodeId="179">
    <graphics z="0.0" y="-192.6606057324234" x="177.76561227003685">
      <att name="lockedVisualProperties" type="list" cy:type="List">
        <att name="NODE_LABEL" value="" type="string" cy:type="String"/>
      </att>
    </graphics>
  </node>
  <node id="46239" label="ENSMUSG00000015224" cy:nodeId="180">
    <graphics z="0.0" y="69.08409183837739" x="238.82787766615502">
      <att name="lockedVisualProperties" type="list" cy:type="List">
        <att name="NODE_LABEL" value="" type="string" cy:type="String"/>
      </att>
    </graphics>
  </node>
  <node id="46238" label="ENSMUSG00000015396" cy:nodeId="181">
    <graphics z="0.0" y="74.6679312548813" x="-150.81420454820045">
      <att name="lockedVisualProperties" type="list" cy:type="List">
        <att name="NODE_LABEL" value="" type="string" cy:type="String"/>
      </att>
    </graphics>
  </node>
  <node id="46237" label="ENSMUSG00000015533" cy:nodeId="182">
    <graphics z="0.0" y="228.4518668017563" x="404.7303816334402">
      <att name="lockedVisualProperties" type="list" cy:type="List">
        <att name="NODE_LABEL" value="" type="string" cy:type="String"/>
      </att>
    </graphics>
  </node>
  <node id="46236" label="ENSMUSG00000015647" cy:nodeId="183">
    <graphics z="0.0" y="25.280438121336374" x="-172.8720048411692">
      <att name="lockedVisualProperties" type="list" cy:type="List">
        <att name="NODE_LABEL" value="" type="string" cy:type="String"/>
      </att>
    </graphics>
  </node>
  <node id="46235" label="ENSMUSG00000015806" cy:nodeId="184">
    <graphics z="0.0" y="178.13788669921723" x="-175.1526444896067">
      <att name="lockedVisualProperties" type="list" cy:type="List">
        <att name="NODE_LABEL" value="" type="string" cy:type="String"/>
      </att>
    </graphics>
  </node>
  <node id="46234" label="ENSMUSG00000015829" cy:nodeId="185">
    <graphics z="0.0" y="-153.01682979248199" x="-115.97060713609108">
      <att name="lockedVisualProperties" type="list" cy:type="List">
        <att name="NODE_LABEL" value="" type="string" cy:type="String"/>
      </att>
    </graphics>
  </node>
  <node id="46233" label="ENSMUSG00000015850" cy:nodeId="186">
    <graphics z="0.0" y="99.51230686523286" x="177.69843354384057">
      <att name="lockedVisualProperties" type="list" cy:type="List">
        <att name="NODE_LABEL" value="" type="string" cy:type="String"/>
      </att>
    </graphics>
  </node>
  <node id="46232" label="ENSMUSG00000015880" cy:nodeId="187">
    <graphics z="0.0" y="-47.42221099517974" x="303.4551207081472">
      <att name="lockedVisualProperties" type="list" cy:type="List">
        <att name="NODE_LABEL" value="" type="string" cy:type="String"/>
      </att>
    </graphics>
  </node>
  <node id="46231" label="ENSMUSG00000016028" cy:nodeId="188">
    <graphics z="0.0" y="-255.35106593750152" x="-92.07055220445045">
      <att name="lockedVisualProperties" type="list" cy:type="List">
        <att name="NODE_LABEL" value="" type="string" cy:type="String"/>
      </att>
    </graphics>
  </node>
  <node id="46230" label="ENSMUSG00000016200" cy:nodeId="189">
    <graphics z="0.0" y="-186.38356715820464" x="-140.06435713609108">
      <att name="lockedVisualProperties" type="list" cy:type="List">
        <att name="NODE_LABEL" value="" type="string" cy:type="String"/>
      </att>
    </graphics>
  </node>
  <node id="46229" label="ENSMUSG00000016624" cy:nodeId="190">
    <graphics z="0.0" y="211.43544834472505" x="-160.93624434312233">
      <att name="lockedVisualProperties" type="list" cy:type="List">
        <att name="NODE_LABEL" value="" type="string" cy:type="String"/>
      </att>
    </graphics>
  </node>
  <node id="46228" label="ENSMUSG00000016758" cy:nodeId="191">
    <graphics z="0.0" y="-13.175603214723196" x="139.76763978163353">
      <att name="lockedVisualProperties" type="list" cy:type="List">
        <att name="NODE_LABEL" value="" type="string" cy:type="String"/>
      </att>
    </graphics>
  </node>
  <node id="46227" label="ENSMUSG00000016763" cy:nodeId="192">
    <graphics z="0.0" y="-294.79685145996245" x="-8.316691730817638">
      <att name="lockedVisualProperties" type="list" cy:type="List">
        <att name="NODE_LABEL" value="" type="string" cy:type="String"/>
      </att>
    </graphics>
  </node>
  <node id="46226" label="ENSMUSG00000017165" cy:nodeId="193">
    <graphics z="0.0" y="353.05226963378755" x="53.0138594166433">
      <att name="lockedVisualProperties" type="list" cy:type="List">
        <att name="NODE_LABEL" value="" type="string" cy:type="String"/>
      </att>
    </graphics>
  </node>
  <node id="46225" label="ENSMUSG00000017204" cy:nodeId="194">
    <graphics z="0.0" y="-293.75607997558745" x="127.66638627211205">
      <att name="lockedVisualProperties" type="list" cy:type="List">
        <att name="NODE_LABEL" value="" type="string" cy:type="String"/>
      </att>
    </graphics>
  </node>
  <node id="46224" label="ENSMUSG00000017446" cy:nodeId="195">
    <graphics z="0.0" y="238.54656284667817" x="36.03270402113549">
      <att name="lockedVisualProperties" type="list" cy:type="List">
        <att name="NODE_LABEL" value="" type="string" cy:type="String"/>
      </att>
    </graphics>
  </node>
  <node id="46223" label="ENSMUSG00000017466" cy:nodeId="196">
    <graphics z="0.0" y="41.790795024412546" x="68.37813248793236">
      <att name="lockedVisualProperties" type="list" cy:type="List">
        <att name="NODE_LABEL" value="" type="string" cy:type="String"/>
      </att>
    </graphics>
  </node>
  <node id="46222" label="ENSMUSG00000017639" cy:nodeId="197">
    <graphics z="0.0" y="392.4984061083969" x="110.81557908217064">
      <att name="lockedVisualProperties" type="list" cy:type="List">
        <att name="NODE_LABEL" value="" type="string" cy:type="String"/>
      </att>
    </graphics>
  </node>
  <node id="46221" label="ENSMUSG00000017692" cy:nodeId="198">
    <graphics z="0.0" y="189.40808933593598" x="-106.43899092515358">
      <att name="lockedVisualProperties" type="list" cy:type="List">
        <att name="NODE_LABEL" value="" type="string" cy:type="String"/>
      </att>
    </graphics>
  </node>
  <node id="46220" label="ENSMUSG00000017716" cy:nodeId="199">
    <graphics z="0.0" y="111.23670261718598" x="-107.06542525132545">
      <att name="lockedVisualProperties" type="list" cy:type="List">
        <att name="NODE_LABEL" value="" type="string" cy:type="String"/>
      </att>
    </graphics>
  </node>
  <node id="46219" label="ENSMUSG00000017724" cy:nodeId="200">
    <graphics z="0.0" y="-163.32555324218902" x="221.88809647719017">
      <att name="lockedVisualProperties" type="list" cy:type="List">
        <att name="NODE_LABEL" value="" type="string" cy:type="String"/>
      </att>
    </graphics>
  </node>
  <node id="46218" label="ENSMUSG00000018042" cy:nodeId="201">
    <graphics z="0.0" y="-150.49472743652495" x="96.37282242933861">
      <att name="lockedVisualProperties" type="list" cy:type="List">
        <att name="NODE_LABEL" value="" type="string" cy:type="String"/>
      </att>
    </graphics>
  </node>
  <node id="46217" label="ENSMUSG00000018334" cy:nodeId="202">
    <graphics z="0.0" y="98.53008335449067" x="206.73461022535912">
      <att name="lockedVisualProperties" type="list" cy:type="List">
        <att name="NODE_LABEL" value="" type="string" cy:type="String"/>
      </att>
    </graphics>
  </node>
  <node id="46216" label="ENSMUSG00000018340" cy:nodeId="203">
    <graphics z="0.0" y="222.66103428222505" x="-18.089366291364513">
      <att name="lockedVisualProperties" type="list" cy:type="List">
        <att name="NODE_LABEL" value="" type="string" cy:type="String"/>
      </att>
    </graphics>
  </node>
  <node id="46215" label="ENSMUSG00000018566" cy:nodeId="204">
    <graphics z="0.0" y="73.24816196777192" x="277.51980271498314">
      <att name="lockedVisualProperties" type="list" cy:type="List">
        <att name="NODE_LABEL" value="" type="string" cy:type="String"/>
      </att>
    </graphics>
  </node>
  <node id="46214" label="ENSMUSG00000018593" cy:nodeId="205">
    <graphics z="0.0" y="203.79906528808442" x="134.4255796925222">
      <att name="lockedVisualProperties" type="list" cy:type="List">
        <att name="NODE_LABEL" value="" type="string" cy:type="String"/>
      </att>
    </graphics>
  </node>
  <node id="46213" label="ENSMUSG00000018740" cy:nodeId="206">
    <graphics z="0.0" y="26.137177165525827" x="-232.55703291734108">
      <att name="lockedVisualProperties" type="list" cy:type="List">
        <att name="NODE_LABEL" value="" type="string" cy:type="String"/>
      </att>
    </graphics>
  </node>
  <node id="46212" label="ENSMUSG00000018774" cy:nodeId="207">
    <graphics z="0.0" y="249.06743687011567" x="77.02669205824486">
      <att name="lockedVisualProperties" type="list" cy:type="List">
        <att name="NODE_LABEL" value="" type="string" cy:type="String"/>
      </att>
    </graphics>
  </node>
  <node id="46211" label="ENSMUSG00000018983" cy:nodeId="208">
    <graphics z="0.0" y="-45.42760020874175" x="-183.47323164780983">
      <att name="lockedVisualProperties" type="list" cy:type="List">
        <att name="NODE_LABEL" value="" type="string" cy:type="String"/>
      </att>
    </graphics>
  </node>
  <node id="46210" label="ENSMUSG00000019087" cy:nodeId="209">
    <graphics z="0.0" y="188.8925406298813" x="49.412396098772206">
      <att name="lockedVisualProperties" type="list" cy:type="List">
        <att name="NODE_LABEL" value="" type="string" cy:type="String"/>
      </att>
    </graphics>
  </node>
  <node id="46209" label="ENSMUSG00000019158" cy:nodeId="210">
    <graphics z="0.0" y="99.96106785156098" x="151.74411072889916">
      <att name="lockedVisualProperties" type="list" cy:type="List">
        <att name="NODE_LABEL" value="" type="string" cy:type="String"/>
      </att>
    </graphics>
  </node>
  <node id="46208" label="ENSMUSG00000019194" cy:nodeId="211">
    <graphics z="0.0" y="-93.37966090820464" x="35.21242203871361">
      <att name="lockedVisualProperties" type="list" cy:type="List">
        <att name="NODE_LABEL" value="" type="string" cy:type="String"/>
      </att>
    </graphics>
  </node>
  <node id="46207" label="ENSMUSG00000019564" cy:nodeId="212">
    <graphics z="0.0" y="-71.65174800537261" x="-122.55175337632545">
      <att name="lockedVisualProperties" type="list" cy:type="List">
        <att name="NODE_LABEL" value="" type="string" cy:type="String"/>
      </att>
    </graphics>
  </node>
  <node id="46206" label="ENSMUSG00000019647" cy:nodeId="213">
    <graphics z="0.0" y="74.68174045898286" x="111.95506730238549">
      <att name="lockedVisualProperties" type="list" cy:type="List">
        <att name="NODE_LABEL" value="" type="string" cy:type="String"/>
      </att>
    </graphics>
  </node>
  <node id="46205" label="ENSMUSG00000019762" cy:nodeId="214">
    <graphics z="0.0" y="169.50159519531098" x="61.69373765150658">
      <att name="lockedVisualProperties" type="list" cy:type="List">
        <att name="NODE_LABEL" value="" type="string" cy:type="String"/>
      </att>
    </graphics>
  </node>
  <node id="46204" label="ENSMUSG00000019817" cy:nodeId="215">
    <graphics z="0.0" y="190.22466343261567" x="283.348873759905">
      <att name="lockedVisualProperties" type="list" cy:type="List">
        <att name="NODE_LABEL" value="" type="string" cy:type="String"/>
      </att>
    </graphics>
  </node>
  <node id="46203" label="ENSMUSG00000019846" cy:nodeId="216">
    <graphics z="0.0" y="125.23748081542817" x="302.60786118666283">
      <att name="lockedVisualProperties" type="list" cy:type="List">
        <att name="NODE_LABEL" value="" type="string" cy:type="String"/>
      </att>
    </graphics>
  </node>
  <node id="46202" label="ENSMUSG00000019853" cy:nodeId="217">
    <graphics z="0.0" y="-14.929721180421438" x="-169.04799971421608">
      <att name="lockedVisualProperties" type="list" cy:type="List">
        <att name="NODE_LABEL" value="" type="string" cy:type="String"/>
      </att>
    </graphics>
  </node>
  <node id="46201" label="ENSMUSG00000019916" cy:nodeId="218">
    <graphics z="0.0" y="-128.39858943603667" x="-222.80321822007545">
      <att name="lockedVisualProperties" type="list" cy:type="List">
        <att name="NODE_LABEL" value="" type="string" cy:type="String"/>
      </att>
    </graphics>
  </node>
  <node id="46200" label="ENSMUSG00000019942" cy:nodeId="219">
    <graphics z="0.0" y="188.6028677783188" x="9.287510539690174">
      <att name="lockedVisualProperties" type="list" cy:type="List">
        <att name="NODE_LABEL" value="" type="string" cy:type="String"/>
      </att>
    </graphics>
  </node>
  <node id="46199" label="ENSMUSG00000019986" cy:nodeId="220">
    <graphics z="0.0" y="-53.10988551757964" x="168.21457925001732">
      <att name="lockedVisualProperties" type="list" cy:type="List">
        <att name="NODE_LABEL" value="" type="string" cy:type="String"/>
      </att>
    </graphics>
  </node>
  <node id="46198" label="ENSMUSG00000019997" cy:nodeId="221">
    <graphics z="0.0" y="80.38545292236176" x="-422.2255509837473">
      <att name="lockedVisualProperties" type="list" cy:type="List">
        <att name="NODE_LABEL" value="" type="string" cy:type="String"/>
      </att>
    </graphics>
  </node>
  <node id="46197" label="ENSMUSG00000020009" cy:nodeId="222">
    <graphics z="0.0" y="-4.8644135632339385" x="-35.029933307966076">
      <att name="lockedVisualProperties" type="list" cy:type="List">
        <att name="NODE_LABEL" value="" type="string" cy:type="String"/>
      </att>
    </graphics>
  </node>
  <node id="46196" label="ENSMUSG00000020014" cy:nodeId="223">
    <graphics z="0.0" y="-117.41431361816558" x="162.34173646132103">
      <att name="lockedVisualProperties" type="list" cy:type="List">
        <att name="NODE_LABEL" value="" type="string" cy:type="String"/>
      </att>
    </graphics>
  </node>
  <node id="46195" label="ENSMUSG00000020015" cy:nodeId="224">
    <graphics z="0.0" y="7.086704906004343" x="-162.8796952708567">
      <att name="lockedVisualProperties" type="list" cy:type="List">
        <att name="NODE_LABEL" value="" type="string" cy:type="String"/>
      </att>
    </graphics>
  </node>
  <node id="46194" label="ENSMUSG00000020105" cy:nodeId="225">
    <graphics z="0.0" y="-195.10588771484527" x="48.57021012465111">
      <att name="lockedVisualProperties" type="list" cy:type="List">
        <att name="NODE_LABEL" value="" type="string" cy:type="String"/>
      </att>
    </graphics>
  </node>
  <node id="46193" label="ENSMUSG00000020121" cy:nodeId="226">
    <graphics z="0.0" y="0.0373923144516084" x="-228.7588456614817">
      <att name="lockedVisualProperties" type="list" cy:type="List">
        <att name="NODE_LABEL" value="" type="string" cy:type="String"/>
      </att>
    </graphics>
  </node>
  <node id="46192" label="ENSMUSG00000020277" cy:nodeId="227">
    <graphics z="0.0" y="213.6164938769516" x="27.313435222307362">
      <att name="lockedVisualProperties" type="list" cy:type="List">
        <att name="NODE_LABEL" value="" type="string" cy:type="String"/>
      </att>
    </graphics>
  </node>
  <node id="46191" label="ENSMUSG00000020303" cy:nodeId="228">
    <graphics z="0.0" y="266.8069693408188" x="204.4026304737722">
      <att name="lockedVisualProperties" type="list" cy:type="List">
        <att name="NODE_LABEL" value="" type="string" cy:type="String"/>
      </att>
    </graphics>
  </node>
  <node id="46190" label="ENSMUSG00000020334" cy:nodeId="229">
    <graphics z="0.0" y="224.04726475097505" x="-27.744227741559826">
      <att name="lockedVisualProperties" type="list" cy:type="List">
        <att name="NODE_LABEL" value="" type="string" cy:type="String"/>
      </att>
    </graphics>
  </node>
  <node id="46189" label="ENSMUSG00000020363" cy:nodeId="230">
    <graphics z="0.0" y="353.8101736865219" x="18.6878096119558">
      <att name="lockedVisualProperties" type="list" cy:type="List">
        <att name="NODE_LABEL" value="" type="string" cy:type="String"/>
      </att>
    </graphics>
  </node>
  <node id="46188" label="ENSMUSG00000020376" cy:nodeId="231">
    <graphics z="0.0" y="317.6914908251938" x="180.41213336149804">
      <att name="lockedVisualProperties" type="list" cy:type="List">
        <att name="NODE_LABEL" value="" type="string" cy:type="String"/>
      </att>
    </graphics>
  </node>
  <node id="46187" label="ENSMUSG00000020387" cy:nodeId="232">
    <graphics z="0.0" y="-152.0453026928726" x="-93.27071699937233">
      <att name="lockedVisualProperties" type="list" cy:type="List">
        <att name="NODE_LABEL" value="" type="string" cy:type="String"/>
      </att>
    </graphics>
  </node>
  <node id="46186" label="ENSMUSG00000020407" cy:nodeId="233">
    <graphics z="0.0" y="203.11562412597505" x="-60.32860884507545">
      <att name="lockedVisualProperties" type="list" cy:type="List">
        <att name="NODE_LABEL" value="" type="string" cy:type="String"/>
      </att>
    </graphics>
  </node>
  <node id="46185" label="ENSMUSG00000020424" cy:nodeId="234">
    <graphics z="0.0" y="313.5947195849594" x="-14.1357987864817">
      <att name="lockedVisualProperties" type="list" cy:type="List">
        <att name="NODE_LABEL" value="" type="string" cy:type="String"/>
      </att>
    </graphics>
  </node>
  <node id="46184" label="ENSMUSG00000020471" cy:nodeId="235">
    <graphics z="0.0" y="95.11269443847505" x="288.6166197315847">
      <att name="lockedVisualProperties" type="list" cy:type="List">
        <att name="NODE_LABEL" value="" type="string" cy:type="String"/>
      </att>
    </graphics>
  </node>
  <node id="46183" label="ENSMUSG00000020599" cy:nodeId="236">
    <graphics z="0.0" y="274.93496006347505" x="315.39360490004174">
      <att name="lockedVisualProperties" type="list" cy:type="List">
        <att name="NODE_LABEL" value="" type="string" cy:type="String"/>
      </att>
    </graphics>
  </node>
  <node id="46182" label="ENSMUSG00000020635" cy:nodeId="237">
    <graphics z="0.0" y="-67.81140071533355" x="-82.69100508530983">
      <att name="lockedVisualProperties" type="list" cy:type="List">
        <att name="NODE_LABEL" value="" type="string" cy:type="String"/>
      </att>
    </graphics>
  </node>
  <node id="46181" label="ENSMUSG00000020668" cy:nodeId="238">
    <graphics z="0.0" y="53.23047703124848" x="51.14131608168236">
      <att name="lockedVisualProperties" type="list" cy:type="List">
        <att name="NODE_LABEL" value="" type="string" cy:type="String"/>
      </att>
    </graphics>
  </node>
  <node id="46180" label="ENSMUSG00000020674" cy:nodeId="239">
    <graphics z="0.0" y="-161.00619441650542" x="-254.94918379624733">
      <att name="lockedVisualProperties" type="list" cy:type="List">
        <att name="NODE_LABEL" value="" type="string" cy:type="String"/>
      </att>
    </graphics>
  </node>
  <node id="46179" label="ENSMUSG00000020715" cy:nodeId="240">
    <graphics z="0.0" y="-148.27211696289214" x="2.5738569752370495">
      <att name="lockedVisualProperties" type="list" cy:type="List">
        <att name="NODE_LABEL" value="" type="string" cy:type="String"/>
      </att>
    </graphics>
  </node>
  <node id="46178" label="ENSMUSG00000020741" cy:nodeId="241">
    <graphics z="0.0" y="27.255615886228952" x="-79.7473710521067">
      <att name="lockedVisualProperties" type="list" cy:type="List">
        <att name="NODE_LABEL" value="" type="string" cy:type="String"/>
      </att>
    </graphics>
  </node>
  <node id="46177" label="ENSMUSG00000020747" cy:nodeId="242">
    <graphics z="0.0" y="-119.63994533203277" x="-205.52437910874733">
      <att name="lockedVisualProperties" type="list" cy:type="List">
        <att name="NODE_LABEL" value="" type="string" cy:type="String"/>
      </att>
    </graphics>
  </node>
  <node id="46176" label="ENSMUSG00000020838" cy:nodeId="243">
    <graphics z="0.0" y="158.08368748046723" x="-23.339701984723888">
      <att name="lockedVisualProperties" type="list" cy:type="List">
        <att name="NODE_LABEL" value="" type="string" cy:type="String"/>
      </att>
    </graphics>
  </node>
  <node id="46175" label="ENSMUSG00000020846" cy:nodeId="244">
    <graphics z="0.0" y="213.30410068847505" x="57.864605571428456">
      <att name="lockedVisualProperties" type="list" cy:type="List">
        <att name="NODE_LABEL" value="" type="string" cy:type="String"/>
      </att>
    </graphics>
  </node>
  <node id="46174" label="ENSMUSG00000020872" cy:nodeId="245">
    <graphics z="0.0" y="-22.16665393493804" x="-90.78780684312233">
      <att name="lockedVisualProperties" type="list" cy:type="List">
        <att name="NODE_LABEL" value="" type="string" cy:type="String"/>
      </att>
    </graphics>
  </node>
  <node id="46173" label="ENSMUSG00000020892" cy:nodeId="246">
    <graphics z="0.0" y="-36.25418883941802" x="196.73481621901146">
      <att name="lockedVisualProperties" type="list" cy:type="List">
        <att name="NODE_LABEL" value="" type="string" cy:type="String"/>
      </att>
    </graphics>
  </node>
  <node id="46172" label="ENSMUSG00000020894" cy:nodeId="247">
    <graphics z="0.0" y="-178.2101662792984" x="94.4269453541433">
      <att name="lockedVisualProperties" type="list" cy:type="List">
        <att name="NODE_LABEL" value="" type="string" cy:type="String"/>
      </att>
    </graphics>
  </node>
  <node id="46171" label="ENSMUSG00000020897" cy:nodeId="248">
    <graphics z="0.0" y="-48.86689502380523" x="-224.42934737046608">
      <att name="lockedVisualProperties" type="list" cy:type="List">
        <att name="NODE_LABEL" value="" type="string" cy:type="String"/>
      </att>
    </graphics>
  </node>
  <node id="46170" label="ENSMUSG00000020978" cy:nodeId="249">
    <graphics z="0.0" y="-100.37687617920074" x="-149.3093827708567">
      <att name="lockedVisualProperties" type="list" cy:type="List">
        <att name="NODE_LABEL" value="" type="string" cy:type="String"/>
      </att>
    </graphics>
  </node>
  <node id="46169" label="ENSMUSG00000021094" cy:nodeId="250">
    <graphics z="0.0" y="116.85660618163911" x="-2.5630143626535755">
      <att name="lockedVisualProperties" type="list" cy:type="List">
        <att name="NODE_LABEL" value="" type="string" cy:type="String"/>
      </att>
    </graphics>
  </node>
  <node id="46168" label="ENSMUSG00000021108" cy:nodeId="251">
    <graphics z="0.0" y="277.96865146972505" x="-178.57778487046608">
      <att name="lockedVisualProperties" type="list" cy:type="List">
        <att name="NODE_LABEL" value="" type="string" cy:type="String"/>
      </att>
    </graphics>
  </node>
  <node id="46167" label="ENSMUSG00000021185" cy:nodeId="252">
    <graphics z="0.0" y="145.27910679199067" x="-125.58239302476295">
      <att name="lockedVisualProperties" type="list" cy:type="List">
        <att name="NODE_LABEL" value="" type="string" cy:type="String"/>
      </att>
    </graphics>
  </node>
  <node id="46166" label="ENSMUSG00000021194" cy:nodeId="253">
    <graphics z="0.0" y="196.92907017089692" x="252.1274076954519">
      <att name="lockedVisualProperties" type="list" cy:type="List">
        <att name="NODE_LABEL" value="" type="string" cy:type="String"/>
      </att>
    </graphics>
  </node>
  <node id="46165" label="ENSMUSG00000021196" cy:nodeId="254">
    <graphics z="0.0" y="25.24919956542817" x="-26.8366044505442">
      <att name="lockedVisualProperties" type="list" cy:type="List">
        <att name="NODE_LABEL" value="" type="string" cy:type="String"/>
      </att>
    </graphics>
  </node>
  <node id="46164" label="ENSMUSG00000021203" cy:nodeId="255">
    <graphics z="0.0" y="-317.0158761181656" x="-188.16637739976295">
      <att name="lockedVisualProperties" type="list" cy:type="List">
        <att name="NODE_LABEL" value="" type="string" cy:type="String"/>
      </att>
    </graphics>
  </node>
  <node id="46163" label="ENSMUSG00000021223" cy:nodeId="256">
    <graphics z="0.0" y="314.37087314941255" x="113.53440919081322">
      <att name="lockedVisualProperties" type="list" cy:type="List">
        <att name="NODE_LABEL" value="" type="string" cy:type="String"/>
      </att>
    </graphics>
  </node>
  <node id="46162" label="ENSMUSG00000021240" cy:nodeId="257">
    <graphics z="0.0" y="145.42226475097505" x="-155.4655107005442">
      <att name="lockedVisualProperties" type="list" cy:type="List">
        <att name="NODE_LABEL" value="" type="string" cy:type="String"/>
      </att>
    </graphics>
  </node>
  <node id="46161" label="ENSMUSG00000021280" cy:nodeId="258">
    <graphics z="0.0" y="346.1666189990219" x="99.26075425306908">
      <att name="lockedVisualProperties" type="list" cy:type="List">
        <att name="NODE_LABEL" value="" type="string" cy:type="String"/>
      </att>
    </graphics>
  </node>
  <node id="46160" label="ENSMUSG00000021367" cy:nodeId="259">
    <graphics z="0.0" y="80.06475132324067" x="-166.99251875718483">
      <att name="lockedVisualProperties" type="list" cy:type="List">
        <att name="NODE_LABEL" value="" type="string" cy:type="String"/>
      </att>
    </graphics>
  </node>
  <node id="46159" label="ENSMUSG00000021477" cy:nodeId="260">
    <graphics z="0.0" y="-90.02085811279449" x="-19.28039107163795">
      <att name="lockedVisualProperties" type="list" cy:type="List">
        <att name="NODE_LABEL" value="" type="string" cy:type="String"/>
      </att>
    </graphics>
  </node>
  <node id="46158" label="ENSMUSG00000021539" cy:nodeId="261">
    <graphics z="0.0" y="-25.020391766053763" x="-41.10978255113014">
      <att name="lockedVisualProperties" type="list" cy:type="List">
        <att name="NODE_LABEL" value="" type="string" cy:type="String"/>
      </att>
    </graphics>
  </node>
  <node id="46157" label="ENSMUSG00000021565" cy:nodeId="262">
    <graphics z="0.0" y="279.5497671923813" x="-539.9021256907786">
      <att name="lockedVisualProperties" type="list" cy:type="List">
        <att name="NODE_LABEL" value="" type="string" cy:type="String"/>
      </att>
    </graphics>
  </node>
  <node id="46156" label="ENSMUSG00000021604" cy:nodeId="263">
    <graphics z="0.0" y="-63.100102726441946" x="133.86169114271752">
      <att name="lockedVisualProperties" type="list" cy:type="List">
        <att name="NODE_LABEL" value="" type="string" cy:type="String"/>
      </att>
    </graphics>
  </node>
  <node id="46155" label="ENSMUSG00000021701" cy:nodeId="264">
    <graphics z="0.0" y="-42.32948810241851" x="47.9230391041433">
      <att name="lockedVisualProperties" type="list" cy:type="List">
        <att name="NODE_LABEL" value="" type="string" cy:type="String"/>
      </att>
    </graphics>
  </node>
  <node id="46154" label="ENSMUSG00000021725" cy:nodeId="265">
    <graphics z="0.0" y="63.69925754882661" x="77.61793961683861">
      <att name="lockedVisualProperties" type="list" cy:type="List">
        <att name="NODE_LABEL" value="" type="string" cy:type="String"/>
      </att>
    </graphics>
  </node>
  <node id="46153" label="ENSMUSG00000021806" cy:nodeId="266">
    <graphics z="0.0" y="-60.513844791871634" x="121.50559678236596">
      <att name="lockedVisualProperties" type="list" cy:type="List">
        <att name="NODE_LABEL" value="" type="string" cy:type="String"/>
      </att>
    </graphics>
  </node>
  <node id="46152" label="ENSMUSG00000021822" cy:nodeId="267">
    <graphics z="0.0" y="253.37279575683442" x="-11.707911823591076">
      <att name="lockedVisualProperties" type="list" cy:type="List">
        <att name="NODE_LABEL" value="" type="string" cy:type="String"/>
      </att>
    </graphics>
  </node>
  <node id="46151" label="ENSMUSG00000021831" cy:nodeId="268">
    <graphics z="0.0" y="-64.55210620544585" x="-153.4662431224192">
      <att name="lockedVisualProperties" type="list" cy:type="List">
        <att name="NODE_LABEL" value="" type="string" cy:type="String"/>
      </att>
    </graphics>
  </node>
  <node id="46150" label="ENSMUSG00000021876" cy:nodeId="269">
    <graphics z="0.0" y="-33.12685710571441" x="-149.81823286851295">
      <att name="lockedVisualProperties" type="list" cy:type="List">
        <att name="NODE_LABEL" value="" type="string" cy:type="String"/>
      </att>
    </graphics>
  </node>
  <node id="46149" label="ENSMUSG00000021947" cy:nodeId="270">
    <graphics z="0.0" y="133.96411960937348" x="-75.26743635972389">
      <att name="lockedVisualProperties" type="list" cy:type="List">
        <att name="NODE_LABEL" value="" type="string" cy:type="String"/>
      </att>
    </graphics>
  </node>
  <node id="46148" label="ENSMUSG00000021957" cy:nodeId="271">
    <graphics z="0.0" y="230.3052603564438" x="131.31232896010033">
      <att name="lockedVisualProperties" type="list" cy:type="List">
        <att name="NODE_LABEL" value="" type="string" cy:type="String"/>
      </att>
    </graphics>
  </node>
  <node id="46147" label="ENSMUSG00000021974" cy:nodeId="272">
    <graphics z="0.0" y="515.4234854541" x="6.6709028736745495">
      <att name="lockedVisualProperties" type="list" cy:type="List">
        <att name="NODE_LABEL" value="" type="string" cy:type="String"/>
      </att>
    </graphics>
  </node>
  <node id="46146" label="ENSMUSG00000022033" cy:nodeId="273">
    <graphics z="0.0" y="-31.429802242738333" x="219.41596665541283">
      <att name="lockedVisualProperties" type="list" cy:type="List">
        <att name="NODE_LABEL" value="" type="string" cy:type="String"/>
      </att>
    </graphics>
  </node>
  <node id="46145" label="ENSMUSG00000022051" cy:nodeId="274">
    <graphics z="0.0" y="67.74388187743989" x="-109.0949052317942">
      <att name="lockedVisualProperties" type="list" cy:type="List">
        <att name="NODE_LABEL" value="" type="string" cy:type="String"/>
      </att>
    </graphics>
  </node>
  <node id="46144" label="ENSMUSG00000022094" cy:nodeId="275">
    <graphics z="0.0" y="-148.1835091748062" x="-91.98266157945045">
      <att name="lockedVisualProperties" type="list" cy:type="List">
        <att name="NODE_LABEL" value="" type="string" cy:type="String"/>
      </att>
    </graphics>
  </node>
  <node id="46143" label="ENSMUSG00000022136" cy:nodeId="276">
    <graphics z="0.0" y="-70.75430614135894" x="-40.00329146226295">
      <att name="lockedVisualProperties" type="list" cy:type="List">
        <att name="NODE_LABEL" value="" type="string" cy:type="String"/>
      </att>
    </graphics>
  </node>
  <node id="46142" label="ENSMUSG00000022148" cy:nodeId="277">
    <graphics z="0.0" y="-52.4451287426773" x="55.60572495619408">
      <att name="lockedVisualProperties" type="list" cy:type="List">
        <att name="NODE_LABEL" value="" type="string" cy:type="String"/>
      </att>
    </graphics>
  </node>
  <node id="46141" label="ENSMUSG00000022178" cy:nodeId="278">
    <graphics z="0.0" y="-110.17599422119292" x="77.39959397474877">
      <att name="lockedVisualProperties" type="list" cy:type="List">
        <att name="NODE_LABEL" value="" type="string" cy:type="String"/>
      </att>
    </graphics>
  </node>
  <node id="46140" label="ENSMUSG00000022208" cy:nodeId="279">
    <graphics z="0.0" y="-53.465411488038626" x="78.8558775440847">
      <att name="lockedVisualProperties" type="list" cy:type="List">
        <att name="NODE_LABEL" value="" type="string" cy:type="String"/>
      </att>
    </graphics>
  </node>
  <node id="46139" label="ENSMUSG00000022217" cy:nodeId="280">
    <graphics z="0.0" y="313.49208896972505" x="-119.98482832749733">
      <att name="lockedVisualProperties" type="list" cy:type="List">
        <att name="NODE_LABEL" value="" type="string" cy:type="String"/>
      </att>
    </graphics>
  </node>
  <node id="46138" label="ENSMUSG00000022219" cy:nodeId="281">
    <graphics z="0.0" y="323.43022983886567" x="-92.52721724351295">
      <att name="lockedVisualProperties" type="list" cy:type="List">
        <att name="NODE_LABEL" value="" type="string" cy:type="String"/>
      </att>
    </graphics>
  </node>
  <node id="46137" label="ENSMUSG00000022235" cy:nodeId="282">
    <graphics z="0.0" y="-215.3165658154312" x="37.97339310804955">
      <att name="lockedVisualProperties" type="list" cy:type="List">
        <att name="NODE_LABEL" value="" type="string" cy:type="String"/>
      </att>
    </graphics>
  </node>
  <node id="46136" label="ENSMUSG00000022253" cy:nodeId="283">
    <graphics z="0.0" y="112.0021597705063" x="190.63784566084496">
      <att name="lockedVisualProperties" type="list" cy:type="List">
        <att name="NODE_LABEL" value="" type="string" cy:type="String"/>
      </att>
    </graphics>
  </node>
  <node id="46135" label="ENSMUSG00000022265" cy:nodeId="284">
    <graphics z="0.0" y="219.50733249999848" x="-111.4475663646067">
      <att name="lockedVisualProperties" type="list" cy:type="List">
        <att name="NODE_LABEL" value="" type="string" cy:type="String"/>
      </att>
    </graphics>
  </node>
  <node id="46134" label="ENSMUSG00000022324" cy:nodeId="285">
    <graphics z="0.0" y="-351.6306222119156" x="-356.9970353587473">
      <att name="lockedVisualProperties" type="list" cy:type="List">
        <att name="NODE_LABEL" value="" type="string" cy:type="String"/>
      </att>
    </graphics>
  </node>
  <node id="46133" label="ENSMUSG00000022364" cy:nodeId="286">
    <graphics z="0.0" y="35.654869731443796" x="172.56635728041283">
      <att name="lockedVisualProperties" type="list" cy:type="List">
        <att name="NODE_LABEL" value="" type="string" cy:type="String"/>
      </att>
    </graphics>
  </node>
  <node id="46132" label="ENSMUSG00000022519" cy:nodeId="287">
    <graphics z="0.0" y="-142.45331508300933" x="-75.42098555405983">
      <att name="lockedVisualProperties" type="list" cy:type="List">
        <att name="NODE_LABEL" value="" type="string" cy:type="String"/>
      </att>
    </graphics>
  </node>
  <node id="46131" label="ENSMUSG00000022543" cy:nodeId="288">
    <graphics z="0.0" y="39.45856541015473" x="120.94009080092064">
      <att name="lockedVisualProperties" type="list" cy:type="List">
        <att name="NODE_LABEL" value="" type="string" cy:type="String"/>
      </att>
    </graphics>
  </node>
  <node id="46130" label="ENSMUSG00000022546" cy:nodeId="289">
    <graphics z="0.0" y="73.48552769042817" x="-118.72741255601295">
      <att name="lockedVisualProperties" type="list" cy:type="List">
        <att name="NODE_LABEL" value="" type="string" cy:type="String"/>
      </att>
    </graphics>
  </node>
  <node id="46129" label="ENSMUSG00000022555" cy:nodeId="290">
    <graphics z="0.0" y="16.887448009031687" x="320.7177168385183">
      <att name="lockedVisualProperties" type="list" cy:type="List">
        <att name="NODE_LABEL" value="" type="string" cy:type="String"/>
      </att>
    </graphics>
  </node>
  <node id="46128" label="ENSMUSG00000022629" cy:nodeId="291">
    <graphics z="0.0" y="-73.35503703735503" x="180.9828020588552">
      <att name="lockedVisualProperties" type="list" cy:type="List">
        <att name="NODE_LABEL" value="" type="string" cy:type="String"/>
      </att>
    </graphics>
  </node>
  <node id="46127" label="ENSMUSG00000022637" cy:nodeId="292">
    <graphics z="0.0" y="27.038582499998483" x="-126.16817793687233">
      <att name="lockedVisualProperties" type="list" cy:type="List">
        <att name="NODE_LABEL" value="" type="string" cy:type="String"/>
      </att>
    </graphics>
  </node>
  <node id="46126" label="ENSMUSG00000022652" cy:nodeId="293">
    <graphics z="0.0" y="141.73886936523286" x="-262.6145280345286">
      <att name="lockedVisualProperties" type="list" cy:type="List">
        <att name="NODE_LABEL" value="" type="string" cy:type="String"/>
      </att>
    </graphics>
  </node>
  <node id="46125" label="ENSMUSG00000022742" cy:nodeId="294">
    <graphics z="0.0" y="32.31363743163911" x="258.66902604261986">
      <att name="lockedVisualProperties" type="list" cy:type="List">
        <att name="NODE_LABEL" value="" type="string" cy:type="String"/>
      </att>
    </graphics>
  </node>
  <node id="46124" label="ENSMUSG00000022817" cy:nodeId="295">
    <graphics z="0.0" y="303.4833914599594" x="-81.9882157786692">
      <att name="lockedVisualProperties" type="list" cy:type="List">
        <att name="NODE_LABEL" value="" type="string" cy:type="String"/>
      </att>
    </graphics>
  </node>
  <node id="46123" label="ENSMUSG00000022829" cy:nodeId="296">
    <graphics z="0.0" y="37.50058811523286" x="338.7113386646902">
      <att name="lockedVisualProperties" type="list" cy:type="List">
        <att name="NODE_LABEL" value="" type="string" cy:type="String"/>
      </att>
    </graphics>
  </node>
  <node id="46122" label="ENSMUSG00000022836" cy:nodeId="297">
    <graphics z="0.0" y="-146.12836391113433" x="-6.2317155345285755">
      <att name="lockedVisualProperties" type="list" cy:type="List">
        <att name="NODE_LABEL" value="" type="string" cy:type="String"/>
      </att>
    </graphics>
  </node>
  <node id="46121" label="ENSMUSG00000022844" cy:nodeId="298">
    <graphics z="0.0" y="250.91722935058442" x="310.2684065357839">
      <att name="lockedVisualProperties" type="list" cy:type="List">
        <att name="NODE_LABEL" value="" type="string" cy:type="String"/>
      </att>
    </graphics>
  </node>
  <node id="46120" label="ENSMUSG00000022864" cy:nodeId="299">
    <graphics z="0.0" y="231.8681265673813" x="121.83686509291283">
      <att name="lockedVisualProperties" type="list" cy:type="List">
        <att name="NODE_LABEL" value="" type="string" cy:type="String"/>
      </att>
    </graphics>
  </node>
  <node id="46119" label="ENSMUSG00000022883" cy:nodeId="300">
    <graphics z="0.0" y="-224.16950160644683" x="-3.081767414411388">
      <att name="lockedVisualProperties" type="list" cy:type="List">
        <att name="NODE_LABEL" value="" type="string" cy:type="String"/>
      </att>
    </graphics>
  </node>
  <node id="46118" label="ENSMUSG00000022947" cy:nodeId="301">
    <graphics z="0.0" y="-91.44333583496245" x="-140.98940596421608">
      <att name="lockedVisualProperties" type="list" cy:type="List">
        <att name="NODE_LABEL" value="" type="string" cy:type="String"/>
      </att>
    </graphics>
  </node>
  <node id="46117" label="ENSMUSG00000022995" cy:nodeId="302">
    <graphics z="0.0" y="-46.41290885589751" x="-72.92074141343483">
      <att name="lockedVisualProperties" type="list" cy:type="List">
        <att name="NODE_LABEL" value="" type="string" cy:type="String"/>
      </att>
    </graphics>
  </node>
  <node id="46116" label="ENSMUSG00000023004" cy:nodeId="303">
    <graphics z="0.0" y="25.115257915037546" x="343.718128825823">
      <att name="lockedVisualProperties" type="list" cy:type="List">
        <att name="NODE_LABEL" value="" type="string" cy:type="String"/>
      </att>
    </graphics>
  </node>
  <node id="46115" label="ENSMUSG00000023008" cy:nodeId="304">
    <graphics z="0.0" y="28.94658726074067" x="119.19189896742455">
      <att name="lockedVisualProperties" type="list" cy:type="List">
        <att name="NODE_LABEL" value="" type="string" cy:type="String"/>
      </att>
    </graphics>
  </node>
  <node id="46114" label="ENSMUSG00000023015" cy:nodeId="305">
    <graphics z="0.0" y="237.38799351074067" x="-163.49178633530983">
      <att name="lockedVisualProperties" type="list" cy:type="List">
        <att name="NODE_LABEL" value="" type="string" cy:type="String"/>
      </att>
    </graphics>
  </node>
  <node id="46113" label="ENSMUSG00000023017" cy:nodeId="306">
    <graphics z="0.0" y="-154.33193141601714" x="168.91293778578392">
      <att name="lockedVisualProperties" type="list" cy:type="List">
        <att name="NODE_LABEL" value="" type="string" cy:type="String"/>
      </att>
    </graphics>
  </node>
  <node id="46112" label="ENSMUSG00000023032" cy:nodeId="307">
    <graphics z="0.0" y="-41.51558906219634" x="271.86702408949486">
      <att name="lockedVisualProperties" type="list" cy:type="List">
        <att name="NODE_LABEL" value="" type="string" cy:type="String"/>
      </att>
    </graphics>
  </node>
  <node id="46111" label="ENSMUSG00000023078" cy:nodeId="308">
    <graphics z="0.0" y="-205.57416469238433" x="-90.74172530015358">
      <att name="lockedVisualProperties" type="list" cy:type="List">
        <att name="NODE_LABEL" value="" type="string" cy:type="String"/>
      </att>
    </graphics>
  </node>
  <node id="46110" label="ENSMUSG00000023216" cy:nodeId="309">
    <graphics z="0.0" y="-227.59130031250152" x="408.0086409107839">
      <att name="lockedVisualProperties" type="list" cy:type="List">
        <att name="NODE_LABEL" value="" type="string" cy:type="String"/>
      </att>
    </graphics>
  </node>
  <node id="46109" label="ENSMUSG00000023247" cy:nodeId="310">
    <graphics z="0.0" y="8.089241679685983" x="408.1614119068777">
      <att name="lockedVisualProperties" type="list" cy:type="List">
        <att name="NODE_LABEL" value="" type="string" cy:type="String"/>
      </att>
    </graphics>
  </node>
  <node id="46108" label="ENSMUSG00000023262" cy:nodeId="311">
    <graphics z="0.0" y="256.8826834521469" x="251.26511063734642">
      <att name="lockedVisualProperties" type="list" cy:type="List">
        <att name="NODE_LABEL" value="" type="string" cy:type="String"/>
      </att>
    </graphics>
  </node>
  <node id="46107" label="ENSMUSG00000023473" cy:nodeId="312">
    <graphics z="0.0" y="282.1883475146469" x="-322.7199052317942">
      <att name="lockedVisualProperties" type="list" cy:type="List">
        <att name="NODE_LABEL" value="" type="string" cy:type="String"/>
      </att>
    </graphics>
  </node>
  <node id="46106" label="ENSMUSG00000023800" cy:nodeId="313">
    <graphics z="0.0" y="-53.0078728833023" x="-113.4834550364817">
      <att name="lockedVisualProperties" type="list" cy:type="List">
        <att name="NODE_LABEL" value="" type="string" cy:type="String"/>
      </att>
    </graphics>
  </node>
  <node id="46105" label="ENSMUSG00000023809" cy:nodeId="314">
    <graphics z="0.0" y="-11.574374500733938" x="-52.805384968122326">
      <att name="lockedVisualProperties" type="list" cy:type="List">
        <att name="NODE_LABEL" value="" type="string" cy:type="String"/>
      </att>
    </graphics>
  </node>
  <node id="46104" label="ENSMUSG00000023827" cy:nodeId="315">
    <graphics z="0.0" y="-263.1532052197281" x="34.94173112074486">
      <att name="lockedVisualProperties" type="list" cy:type="List">
        <att name="NODE_LABEL" value="" type="string" cy:type="String"/>
      </att>
    </graphics>
  </node>
  <node id="46103" label="ENSMUSG00000023905" cy:nodeId="316">
    <graphics z="0.0" y="278.10002964355317" x="15.975071574846424">
      <att name="lockedVisualProperties" type="list" cy:type="List">
        <att name="NODE_LABEL" value="" type="string" cy:type="String"/>
      </att>
    </graphics>
  </node>
  <node id="46102" label="ENSMUSG00000023906" cy:nodeId="317">
    <graphics z="0.0" y="194.10607212402192" x="330.12358536879174">
      <att name="lockedVisualProperties" type="list" cy:type="List">
        <att name="NODE_LABEL" value="" type="string" cy:type="String"/>
      </att>
    </graphics>
  </node>
  <node id="46101" label="ENSMUSG00000023940" cy:nodeId="318">
    <graphics z="0.0" y="207.04790562011567" x="-206.89623579820045">
      <att name="lockedVisualProperties" type="list" cy:type="List">
        <att name="NODE_LABEL" value="" type="string" cy:type="String"/>
      </att>
    </graphics>
  </node>
  <node id="46100" label="ENSMUSG00000023961" cy:nodeId="319">
    <graphics z="0.0" y="108.57291477538911" x="219.13312974135033">
      <att name="lockedVisualProperties" type="list" cy:type="List">
        <att name="NODE_LABEL" value="" type="string" cy:type="String"/>
      </att>
    </graphics>
  </node>
  <node id="46099" label="ENSMUSG00000023963" cy:nodeId="320">
    <graphics z="0.0" y="211.32329624511567" x="135.09716477553002">
      <att name="lockedVisualProperties" type="list" cy:type="List">
        <att name="NODE_LABEL" value="" type="string" cy:type="String"/>
      </att>
    </graphics>
  </node>
  <node id="46098" label="ENSMUSG00000024074" cy:nodeId="321">
    <graphics z="0.0" y="164.61867588378755" x="-349.7621720774973">
      <att name="lockedVisualProperties" type="list" cy:type="List">
        <att name="NODE_LABEL" value="" type="string" cy:type="String"/>
      </att>
    </graphics>
  </node>
  <node id="46097" label="ENSMUSG00000024105" cy:nodeId="322">
    <graphics z="0.0" y="280.2514578662094" x="308.5017439381277">
      <att name="lockedVisualProperties" type="list" cy:type="List">
        <att name="NODE_LABEL" value="" type="string" cy:type="String"/>
      </att>
    </graphics>
  </node>
  <node id="46096" label="ENSMUSG00000024112" cy:nodeId="323">
    <graphics z="0.0" y="-37.83129054687652" x="187.93048920790307">
      <att name="lockedVisualProperties" type="list" cy:type="List">
        <att name="NODE_LABEL" value="" type="string" cy:type="String"/>
      </att>
    </graphics>
  </node>
  <node id="46095" label="ENSMUSG00000024140" cy:nodeId="324">
    <graphics z="0.0" y="195.58954685546723" x="79.72402634779564">
      <att name="lockedVisualProperties" type="list" cy:type="List">
        <att name="NODE_LABEL" value="" type="string" cy:type="String"/>
      </att>
    </graphics>
  </node>
  <node id="46094" label="ENSMUSG00000024193" cy:nodeId="325">
    <graphics z="0.0" y="249.29015415527192" x="-69.55819258530983">
      <att name="lockedVisualProperties" type="list" cy:type="List">
        <att name="NODE_LABEL" value="" type="string" cy:type="String"/>
      </att>
    </graphics>
  </node>
  <node id="46093" label="ENSMUSG00000024232" cy:nodeId="326">
    <graphics z="0.0" y="-249.63796168945464" x="29.348164226213612">
      <att name="lockedVisualProperties" type="list" cy:type="List">
        <att name="NODE_LABEL" value="" type="string" cy:type="String"/>
      </att>
    </graphics>
  </node>
  <node id="46092" label="ENSMUSG00000024330" cy:nodeId="327">
    <graphics z="0.0" y="422.3806082568344" x="251.32191147963158">
      <att name="lockedVisualProperties" type="list" cy:type="List">
        <att name="NODE_LABEL" value="" type="string" cy:type="String"/>
      </att>
    </graphics>
  </node>
  <node id="46091" label="ENSMUSG00000024349" cy:nodeId="328">
    <graphics z="0.0" y="91.73088138915864" x="-208.93801436265358">
      <att name="lockedVisualProperties" type="list" cy:type="List">
        <att name="NODE_LABEL" value="" type="string" cy:type="String"/>
      </att>
    </graphics>
  </node>
  <node id="46090" label="ENSMUSG00000024352" cy:nodeId="329">
    <graphics z="0.0" y="-61.54470569275054" x="161.0673443333303">
      <att name="lockedVisualProperties" type="list" cy:type="List">
        <att name="NODE_LABEL" value="" type="string" cy:type="String"/>
      </att>
    </graphics>
  </node>
  <node id="46089" label="ENSMUSG00000024378" cy:nodeId="330">
    <graphics z="0.0" y="144.73403232910005" x="-41.5079911692942">
      <att name="lockedVisualProperties" type="list" cy:type="List">
        <att name="NODE_LABEL" value="" type="string" cy:type="String"/>
      </att>
    </graphics>
  </node>
  <node id="46088" label="ENSMUSG00000024479" cy:nodeId="331">
    <graphics z="0.0" y="12.881161387937937" x="-169.01888594468483">
      <att name="lockedVisualProperties" type="list" cy:type="List">
        <att name="NODE_LABEL" value="" type="string" cy:type="String"/>
      </att>
    </graphics>
  </node>
  <node id="46087" label="ENSMUSG00000024516" cy:nodeId="332">
    <graphics z="0.0" y="327.75286167480317" x="123.4293982044851">
      <att name="lockedVisualProperties" type="list" cy:type="List">
        <att name="NODE_LABEL" value="" type="string" cy:type="String"/>
      </att>
    </graphics>
  </node>
  <node id="46086" label="ENSMUSG00000024548" cy:nodeId="333">
    <graphics z="0.0" y="150.18378513671723" x="-22.093898151716076">
      <att name="lockedVisualProperties" type="list" cy:type="List">
        <att name="NODE_LABEL" value="" type="string" cy:type="String"/>
      </att>
    </graphics>
  </node>
  <node id="46085" label="ENSMUSG00000024552" cy:nodeId="334">
    <graphics z="0.0" y="349.1312186083969" x="-19.48766646226295">
      <att name="lockedVisualProperties" type="list" cy:type="List">
        <att name="NODE_LABEL" value="" type="string" cy:type="String"/>
      </att>
    </graphics>
  </node>
  <node id="46084" label="ENSMUSG00000024556" cy:nodeId="335">
    <graphics z="0.0" y="2.6098791918930146" x="98.07972397963158">
      <att name="lockedVisualProperties" type="list" cy:type="List">
        <att name="NODE_LABEL" value="" type="string" cy:type="String"/>
      </att>
    </graphics>
  </node>
  <node id="46083" label="ENSMUSG00000024590" cy:nodeId="336">
    <graphics z="0.0" y="-7.018559757691946" x="-89.35363325913795">
      <att name="lockedVisualProperties" type="list" cy:type="List">
        <att name="NODE_LABEL" value="" type="string" cy:type="String"/>
      </att>
    </graphics>
  </node>
  <node id="46082" label="ENSMUSG00000024600" cy:nodeId="337">
    <graphics z="0.0" y="357.57155674316255" x="150.66952576796166">
      <att name="lockedVisualProperties" type="list" cy:type="List">
        <att name="NODE_LABEL" value="" type="string" cy:type="String"/>
      </att>
    </graphics>
  </node>
  <node id="46081" label="ENSMUSG00000024659" cy:nodeId="338">
    <graphics z="0.0" y="-160.28308803222808" x="212.06039490858666">
      <att name="lockedVisualProperties" type="list" cy:type="List">
        <att name="NODE_LABEL" value="" type="string" cy:type="String"/>
      </att>
    </graphics>
  </node>
  <node id="46080" label="ENSMUSG00000024713" cy:nodeId="339">
    <graphics z="0.0" y="188.57544773437348" x="148.54055466810814">
      <att name="lockedVisualProperties" type="list" cy:type="List">
        <att name="NODE_LABEL" value="" type="string" cy:type="String"/>
      </att>
    </graphics>
  </node>
  <node id="46079" label="ENSMUSG00000024727" cy:nodeId="340">
    <graphics z="0.0" y="58.14476841308442" x="-57.675746296247326">
      <att name="lockedVisualProperties" type="list" cy:type="List">
        <att name="NODE_LABEL" value="" type="string" cy:type="String"/>
      </att>
    </graphics>
  </node>
  <node id="46078" label="ENSMUSG00000024738" cy:nodeId="341">
    <graphics z="0.0" y="-70.70709544799956" x="248.115833903948">
      <att name="lockedVisualProperties" type="list" cy:type="List">
        <att name="NODE_LABEL" value="" type="string" cy:type="String"/>
      </att>
    </graphics>
  </node>
  <node id="46077" label="ENSMUSG00000024743" cy:nodeId="342">
    <graphics z="0.0" y="209.65686863281098" x="-26.750529621442638">
      <att name="lockedVisualProperties" type="list" cy:type="List">
        <att name="NODE_LABEL" value="" type="string" cy:type="String"/>
      </att>
    </graphics>
  </node>
  <node id="46076" label="ENSMUSG00000024795" cy:nodeId="343">
    <graphics z="0.0" y="182.9674918017563" x="-80.57226118882545">
      <att name="lockedVisualProperties" type="list" cy:type="List">
        <att name="NODE_LABEL" value="" type="string" cy:type="String"/>
      </att>
    </graphics>
  </node>
  <node id="46075" label="ENSMUSG00000024810" cy:nodeId="344">
    <graphics z="0.0" y="-292.83600551269683" x="170.6021563069021">
      <att name="lockedVisualProperties" type="list" cy:type="List">
        <att name="NODE_LABEL" value="" type="string" cy:type="String"/>
      </att>
    </graphics>
  </node>
  <node id="46074" label="ENSMUSG00000024887" cy:nodeId="345">
    <graphics z="0.0" y="-19.21610576294097" x="-56.91686568101295">
      <att name="lockedVisualProperties" type="list" cy:type="List">
        <att name="NODE_LABEL" value="" type="string" cy:type="String"/>
      </att>
    </graphics>
  </node>
  <node id="46073" label="ENSMUSG00000024897" cy:nodeId="346">
    <graphics z="0.0" y="317.09658115722505" x="-6.2332108958567005">
      <att name="lockedVisualProperties" type="list" cy:type="List">
        <att name="NODE_LABEL" value="" type="string" cy:type="String"/>
      </att>
    </graphics>
  </node>
  <node id="46072" label="ENSMUSG00000024899" cy:nodeId="347">
    <graphics z="0.0" y="-29.300616566163626" x="-23.981089924177013">
      <att name="lockedVisualProperties" type="list" cy:type="List">
        <att name="NODE_LABEL" value="" type="string" cy:type="String"/>
      </att>
    </graphics>
  </node>
  <node id="46071" label="ENSMUSG00000024909" cy:nodeId="348">
    <graphics z="0.0" y="-2.511838261109915" x="-107.3616288646067">
      <att name="lockedVisualProperties" type="list" cy:type="List">
        <att name="NODE_LABEL" value="" type="string" cy:type="String"/>
      </att>
    </graphics>
  </node>
  <node id="46070" label="ENSMUSG00000024978" cy:nodeId="349">
    <graphics z="0.0" y="75.72610538818208" x="-138.25204024155983">
      <att name="lockedVisualProperties" type="list" cy:type="List">
        <att name="NODE_LABEL" value="" type="string" cy:type="String"/>
      </att>
    </graphics>
  </node>
  <node id="46069" label="ENSMUSG00000024998" cy:nodeId="350">
    <graphics z="0.0" y="204.9963003955063" x="-40.43110213120826">
      <att name="lockedVisualProperties" type="list" cy:type="List">
        <att name="NODE_LABEL" value="" type="string" cy:type="String"/>
      </att>
    </graphics>
  </node>
  <node id="46068" label="ENSMUSG00000025001" cy:nodeId="351">
    <graphics z="0.0" y="-57.606177631837454" x="-139.11886153062233">
      <att name="lockedVisualProperties" type="list" cy:type="List">
        <att name="NODE_LABEL" value="" type="string" cy:type="String"/>
      </att>
    </graphics>
  </node>
  <node id="46067" label="ENSMUSG00000025025" cy:nodeId="352">
    <graphics z="0.0" y="38.94440525390473" x="30.629109050432362">
      <att name="lockedVisualProperties" type="list" cy:type="List">
        <att name="NODE_LABEL" value="" type="string" cy:type="String"/>
      </att>
    </graphics>
  </node>
  <node id="46066" label="ENSMUSG00000025035" cy:nodeId="353">
    <graphics z="0.0" y="87.90834873535005" x="438.1101423756277">
      <att name="lockedVisualProperties" type="list" cy:type="List">
        <att name="NODE_LABEL" value="" type="string" cy:type="String"/>
      </att>
    </graphics>
  </node>
  <node id="46065" label="ENSMUSG00000025037" cy:nodeId="354">
    <graphics z="0.0" y="263.1435171923813" x="-20.7362626536692">
      <att name="lockedVisualProperties" type="list" cy:type="List">
        <att name="NODE_LABEL" value="" type="string" cy:type="String"/>
      </att>
    </graphics>
  </node>
  <node id="46064" label="ENSMUSG00000025089" cy:nodeId="355">
    <graphics z="0.0" y="36.505272563475046" x="-107.53902754624733">
      <att name="lockedVisualProperties" type="list" cy:type="List">
        <att name="NODE_LABEL" value="" type="string" cy:type="String"/>
      </att>
    </graphics>
  </node>
  <node id="46063" label="ENSMUSG00000025176" cy:nodeId="356">
    <graphics z="0.0" y="-5.912041965943899" x="85.3761641041433">
      <att name="lockedVisualProperties" type="list" cy:type="List">
        <att name="NODE_LABEL" value="" type="string" cy:type="String"/>
      </att>
    </graphics>
  </node>
  <node id="46062" label="ENSMUSG00000025185" cy:nodeId="357">
    <graphics z="0.0" y="153.62451999999848" x="-66.00072798570045">
      <att name="lockedVisualProperties" type="list" cy:type="List">
        <att name="NODE_LABEL" value="" type="string" cy:type="String"/>
      </att>
    </graphics>
  </node>
  <node id="46061" label="ENSMUSG00000025227" cy:nodeId="358">
    <graphics z="0.0" y="449.4841238818344" x="29.203465129533924">
      <att name="lockedVisualProperties" type="list" cy:type="List">
        <att name="NODE_LABEL" value="" type="string" cy:type="String"/>
      </att>
    </graphics>
  </node>
  <node id="46060" label="ENSMUSG00000025351" cy:nodeId="359">
    <graphics z="0.0" y="291.5663687548813" x="96.84580674330346">
      <att name="lockedVisualProperties" type="list" cy:type="List">
        <att name="NODE_LABEL" value="" type="string" cy:type="String"/>
      </att>
    </graphics>
  </node>
  <node id="46059" label="ENSMUSG00000025352" cy:nodeId="360">
    <graphics z="0.0" y="84.59852665283051" x="89.1136137501394">
      <att name="lockedVisualProperties" type="list" cy:type="List">
        <att name="NODE_LABEL" value="" type="string" cy:type="String"/>
      </att>
    </graphics>
  </node>
  <node id="46058" label="ENSMUSG00000025410" cy:nodeId="361">
    <graphics z="0.0" y="92.72439640380708" x="-295.3263810618723">
      <att name="lockedVisualProperties" type="list" cy:type="List">
        <att name="NODE_LABEL" value="" type="string" cy:type="String"/>
      </att>
    </graphics>
  </node>
  <node id="46057" label="ENSMUSG00000025477" cy:nodeId="362">
    <graphics z="0.0" y="-28.642820183259573" x="189.12871804396264">
      <att name="lockedVisualProperties" type="list" cy:type="List">
        <att name="NODE_LABEL" value="" type="string" cy:type="String"/>
      </att>
    </graphics>
  </node>
  <node id="46056" label="ENSMUSG00000025500" cy:nodeId="363">
    <graphics z="0.0" y="-118.26917201660308" x="408.568470622698">
      <att name="lockedVisualProperties" type="list" cy:type="List">
        <att name="NODE_LABEL" value="" type="string" cy:type="String"/>
      </att>
    </graphics>
  </node>
  <node id="46055" label="ENSMUSG00000025511" cy:nodeId="364">
    <graphics z="0.0" y="-113.37470943115386" x="-445.7412980540598">
      <att name="lockedVisualProperties" type="list" cy:type="List">
        <att name="NODE_LABEL" value="" type="string" cy:type="String"/>
      </att>
    </graphics>
  </node>
  <node id="46054" label="ENSMUSG00000025545" cy:nodeId="365">
    <graphics z="0.0" y="174.25617283202973" x="207.23357262770287">
      <att name="lockedVisualProperties" type="list" cy:type="List">
        <att name="NODE_LABEL" value="" type="string" cy:type="String"/>
      </att>
    </graphics>
  </node>
  <node id="46053" label="ENSMUSG00000025557" cy:nodeId="366">
    <graphics z="0.0" y="237.61461704589692" x="-308.5180314524973">
      <att name="lockedVisualProperties" type="list" cy:type="List">
        <att name="NODE_LABEL" value="" type="string" cy:type="String"/>
      </att>
    </graphics>
  </node>
  <node id="46052" label="ENSMUSG00000025584" cy:nodeId="367">
    <graphics z="0.0" y="-152.5427392163101" x="151.26352944532982">
      <att name="lockedVisualProperties" type="list" cy:type="List">
        <att name="NODE_LABEL" value="" type="string" cy:type="String"/>
      </att>
    </graphics>
  </node>
  <node id="46051" label="ENSMUSG00000025648" cy:nodeId="368">
    <graphics z="0.0" y="164.06211155273286" x="-258.0348771556223">
      <att name="lockedVisualProperties" type="list" cy:type="List">
        <att name="NODE_LABEL" value="" type="string" cy:type="String"/>
      </att>
    </graphics>
  </node>
  <node id="46050" label="ENSMUSG00000025701" cy:nodeId="369">
    <graphics z="0.0" y="-177.9539406933609" x="218.01818909803978">
      <att name="lockedVisualProperties" type="list" cy:type="List">
        <att name="NODE_LABEL" value="" type="string" cy:type="String"/>
      </att>
    </graphics>
  </node>
  <node id="46049" label="ENSMUSG00000025780" cy:nodeId="370">
    <graphics z="0.0" y="13.140625651853952" x="-174.06826338609108">
      <att name="lockedVisualProperties" type="list" cy:type="List">
        <att name="NODE_LABEL" value="" type="string" cy:type="String"/>
      </att>
    </graphics>
  </node>
  <node id="46048" label="ENSMUSG00000025876" cy:nodeId="371">
    <graphics z="0.0" y="-48.12574512146148" x="69.3095137135183">
      <att name="lockedVisualProperties" type="list" cy:type="List">
        <att name="NODE_LABEL" value="" type="string" cy:type="String"/>
      </att>
    </graphics>
  </node>
  <node id="46047" label="ENSMUSG00000025893" cy:nodeId="372">
    <graphics z="0.0" y="322.1015555224594" x="-3.6946671946848255">
      <att name="lockedVisualProperties" type="list" cy:type="List">
        <att name="NODE_LABEL" value="" type="string" cy:type="String"/>
      </att>
    </graphics>
  </node>
  <node id="46046" label="ENSMUSG00000025921" cy:nodeId="373">
    <graphics z="0.0" y="95.27333896972505" x="-242.66210493882545">
      <att name="lockedVisualProperties" type="list" cy:type="List">
        <att name="NODE_LABEL" value="" type="string" cy:type="String"/>
      </att>
    </graphics>
  </node>
  <node id="46045" label="ENSMUSG00000025959" cy:nodeId="374">
    <graphics z="0.0" y="45.80627506591645" x="-169.64977583726295">
      <att name="lockedVisualProperties" type="list" cy:type="List">
        <att name="NODE_LABEL" value="" type="string" cy:type="String"/>
      </att>
    </graphics>
  </node>
  <node id="46044" label="ENSMUSG00000025969" cy:nodeId="375">
    <graphics z="0.0" y="-153.69298488281402" x="79.91602769056908">
      <att name="lockedVisualProperties" type="list" cy:type="List">
        <att name="NODE_LABEL" value="" type="string" cy:type="String"/>
      </att>
    </graphics>
  </node>
  <node id="46043" label="ENSMUSG00000025991" cy:nodeId="376">
    <graphics z="0.0" y="106.64493625976411" x="242.3467451588308">
      <att name="lockedVisualProperties" type="list" cy:type="List">
        <att name="NODE_LABEL" value="" type="string" cy:type="String"/>
      </att>
    </graphics>
  </node>
  <node id="46042" label="ENSMUSG00000026072" cy:nodeId="377">
    <graphics z="0.0" y="-30.17088634155425" x="55.72021165053002">
      <att name="lockedVisualProperties" type="list" cy:type="List">
        <att name="NODE_LABEL" value="" type="string" cy:type="String"/>
      </att>
    </graphics>
  </node>
  <node id="46041" label="ENSMUSG00000026090" cy:nodeId="378">
    <graphics z="0.0" y="0.05802982665863965" x="166.64302315870873">
      <att name="lockedVisualProperties" type="list" cy:type="List">
        <att name="NODE_LABEL" value="" type="string" cy:type="String"/>
      </att>
    </graphics>
  </node>
  <node id="46040" label="ENSMUSG00000026103" cy:nodeId="379">
    <graphics z="0.0" y="42.62021702148286" x="-84.5725663646067">
      <att name="lockedVisualProperties" type="list" cy:type="List">
        <att name="NODE_LABEL" value="" type="string" cy:type="String"/>
      </att>
    </graphics>
  </node>
  <node id="46039" label="ENSMUSG00000026107" cy:nodeId="380">
    <graphics z="0.0" y="26.214111979978952" x="-105.31313643296608">
      <att name="lockedVisualProperties" type="list" cy:type="List">
        <att name="NODE_LABEL" value="" type="string" cy:type="String"/>
      </att>
    </graphics>
  </node>
  <node id="46038" label="ENSMUSG00000026247" cy:nodeId="381">
    <graphics z="0.0" y="41.41492527343598" x="250.24367966810814">
      <att name="lockedVisualProperties" type="list" cy:type="List">
        <att name="NODE_LABEL" value="" type="string" cy:type="String"/>
      </att>
    </graphics>
  </node>
  <node id="46037" label="ENSMUSG00000026278" cy:nodeId="382">
    <graphics z="0.0" y="158.71418064452973" x="-234.68358931382545">
      <att name="lockedVisualProperties" type="list" cy:type="List">
        <att name="NODE_LABEL" value="" type="string" cy:type="String"/>
      </att>
    </graphics>
  </node>
  <node id="46036" label="ENSMUSG00000026385" cy:nodeId="383">
    <graphics z="0.0" y="-445.0726388134781" x="201.37414803663842">
      <att name="lockedVisualProperties" type="list" cy:type="List">
        <att name="NODE_LABEL" value="" type="string" cy:type="String"/>
      </att>
    </graphics>
  </node>
  <node id="46035" label="ENSMUSG00000026430" cy:nodeId="384">
    <graphics z="0.0" y="-74.98727351806792" x="24.723530437151112">
      <att name="lockedVisualProperties" type="list" cy:type="List">
        <att name="NODE_LABEL" value="" type="string" cy:type="String"/>
      </att>
    </graphics>
  </node>
  <node id="46034" label="ENSMUSG00000026442" cy:nodeId="385">
    <graphics z="0.0" y="225.30687778808442" x="-205.60998091538795">
      <att name="lockedVisualProperties" type="list" cy:type="List">
        <att name="NODE_LABEL" value="" type="string" cy:type="String"/>
      </att>
    </graphics>
  </node>
  <node id="46033" label="ENSMUSG00000026482" cy:nodeId="386">
    <graphics z="0.0" y="-453.5694649853531" x="17.792103435197987">
      <att name="lockedVisualProperties" type="list" cy:type="List">
        <att name="NODE_LABEL" value="" type="string" cy:type="String"/>
      </att>
    </graphics>
  </node>
  <node id="46032" label="ENSMUSG00000026483" cy:nodeId="387">
    <graphics z="0.0" y="195.0635611376938" x="-177.47439131577858">
      <att name="lockedVisualProperties" type="list" cy:type="List">
        <att name="NODE_LABEL" value="" type="string" cy:type="String"/>
      </att>
    </graphics>
  </node>
  <node id="46031" label="ENSMUSG00000026504" cy:nodeId="388">
    <graphics z="0.0" y="-69.90408260009917" x="-358.6804460032786">
      <att name="lockedVisualProperties" type="list" cy:type="List">
        <att name="NODE_LABEL" value="" type="string" cy:type="String"/>
      </att>
    </graphics>
  </node>
  <node id="46030" label="ENSMUSG00000026509" cy:nodeId="389">
    <graphics z="0.0" y="-167.97853786132964" x="-101.0835526927317">
      <att name="lockedVisualProperties" type="list" cy:type="List">
        <att name="NODE_LABEL" value="" type="string" cy:type="String"/>
      </att>
    </graphics>
  </node>
  <node id="46029" label="ENSMUSG00000026520" cy:nodeId="390">
    <graphics z="0.0" y="146.28675144531098" x="145.1905123249685">
      <att name="lockedVisualProperties" type="list" cy:type="List">
        <att name="NODE_LABEL" value="" type="string" cy:type="String"/>
      </att>
    </graphics>
  </node>
  <node id="46028" label="ENSMUSG00000026527" cy:nodeId="391">
    <graphics z="0.0" y="-169.53525478027495" x="-83.08385786851295">
      <att name="lockedVisualProperties" type="list" cy:type="List">
        <att name="NODE_LABEL" value="" type="string" cy:type="String"/>
      </att>
    </graphics>
  </node>
  <node id="46027" label="ENSMUSG00000026604" cy:nodeId="392">
    <graphics z="0.0" y="-134.88913661621245" x="234.83930268446557">
      <att name="lockedVisualProperties" type="list" cy:type="List">
        <att name="NODE_LABEL" value="" type="string" cy:type="String"/>
      </att>
    </graphics>
  </node>
  <node id="46026" label="ENSMUSG00000026605" cy:nodeId="393">
    <graphics z="0.0" y="-63.34862071655425" x="29.62024369398705">
      <att name="lockedVisualProperties" type="list" cy:type="List">
        <att name="NODE_LABEL" value="" type="string" cy:type="String"/>
      </att>
    </graphics>
  </node>
  <node id="46025" label="ENSMUSG00000026649" cy:nodeId="394">
    <graphics z="0.0" y="211.61229770995942" x="78.82423081556908">
      <att name="lockedVisualProperties" type="list" cy:type="List">
        <att name="NODE_LABEL" value="" type="string" cy:type="String"/>
      </att>
    </graphics>
  </node>
  <node id="46024" label="ENSMUSG00000026730" cy:nodeId="395">
    <graphics z="0.0" y="139.34722202636567" x="221.28737702528588">
      <att name="lockedVisualProperties" type="list" cy:type="List">
        <att name="NODE_LABEL" value="" type="string" cy:type="String"/>
      </att>
    </graphics>
  </node>
  <node id="46023" label="ENSMUSG00000026782" cy:nodeId="396">
    <graphics z="0.0" y="-129.45443660400542" x="32.007237102190174">
      <att name="lockedVisualProperties" type="list" cy:type="List">
        <att name="NODE_LABEL" value="" type="string" cy:type="String"/>
      </att>
    </graphics>
  </node>
  <node id="46022" label="ENSMUSG00000026848" cy:nodeId="397">
    <graphics z="0.0" y="-90.20899898193511" x="179.80872454802147">
      <att name="lockedVisualProperties" type="list" cy:type="List">
        <att name="NODE_LABEL" value="" type="string" cy:type="String"/>
      </att>
    </graphics>
  </node>
  <node id="46021" label="ENSMUSG00000026879" cy:nodeId="398">
    <graphics z="0.0" y="55.47952335693208" x="-332.7794755442942">
      <att name="lockedVisualProperties" type="list" cy:type="List">
        <att name="NODE_LABEL" value="" type="string" cy:type="String"/>
      </att>
    </graphics>
  </node>
  <node id="46020" label="ENSMUSG00000026880" cy:nodeId="399">
    <graphics z="0.0" y="58.99917667724458" x="31.758198405901112">
      <att name="lockedVisualProperties" type="list" cy:type="List">
        <att name="NODE_LABEL" value="" type="string" cy:type="String"/>
      </att>
    </graphics>
  </node>
  <node id="46019" label="ENSMUSG00000026921" cy:nodeId="400">
    <graphics z="0.0" y="40.646080668943796" x="-60.42332014878639">
      <att name="lockedVisualProperties" type="list" cy:type="List">
        <att name="NODE_LABEL" value="" type="string" cy:type="String"/>
      </att>
    </graphics>
  </node>
  <node id="46018" label="ENSMUSG00000026930" cy:nodeId="401">
    <graphics z="0.0" y="165.10198276855317" x="-161.17956099351295">
      <att name="lockedVisualProperties" type="list" cy:type="List">
        <att name="NODE_LABEL" value="" type="string" cy:type="String"/>
      </att>
    </graphics>
  </node>
  <node id="46017" label="ENSMUSG00000026959" cy:nodeId="402">
    <graphics z="0.0" y="197.96581333495942" x="-310.2405656321848">
      <att name="lockedVisualProperties" type="list" cy:type="List">
        <att name="NODE_LABEL" value="" type="string" cy:type="String"/>
      </att>
    </graphics>
  </node>
  <node id="46016" label="ENSMUSG00000026981" cy:nodeId="403">
    <graphics z="0.0" y="-80.83277827881011" x="386.04170670668236">
      <att name="lockedVisualProperties" type="list" cy:type="List">
        <att name="NODE_LABEL" value="" type="string" cy:type="String"/>
      </att>
    </graphics>
  </node>
  <node id="46015" label="ENSMUSG00000027006" cy:nodeId="404">
    <graphics z="0.0" y="-100.0989373364273" x="201.44089188734642">
      <att name="lockedVisualProperties" type="list" cy:type="List">
        <att name="NODE_LABEL" value="" type="string" cy:type="String"/>
      </att>
    </graphics>
  </node>
  <node id="46014" label="ENSMUSG00000027082" cy:nodeId="405">
    <graphics z="0.0" y="20.817406352537546" x="309.0671125904714">
      <att name="lockedVisualProperties" type="list" cy:type="List">
        <att name="NODE_LABEL" value="" type="string" cy:type="String"/>
      </att>
    </graphics>
  </node>
  <node id="46013" label="ENSMUSG00000027187" cy:nodeId="406">
    <graphics z="0.0" y="47.251366313475046" x="-190.8477128489817">
      <att name="lockedVisualProperties" type="list" cy:type="List">
        <att name="NODE_LABEL" value="" type="string" cy:type="String"/>
      </att>
    </graphics>
  </node>
  <node id="46012" label="ENSMUSG00000027313" cy:nodeId="407">
    <graphics z="0.0" y="289.45317905761567" x="-79.80272993882545">
      <att name="lockedVisualProperties" type="list" cy:type="List">
        <att name="NODE_LABEL" value="" type="string" cy:type="String"/>
      </att>
    </graphics>
  </node>
  <node id="46011" label="ENSMUSG00000027326" cy:nodeId="408">
    <graphics z="0.0" y="51.39146488525239" x="-138.39083418687233">
      <att name="lockedVisualProperties" type="list" cy:type="List">
        <att name="NODE_LABEL" value="" type="string" cy:type="String"/>
      </att>
    </graphics>
  </node>
  <node id="46010" label="ENSMUSG00000027333" cy:nodeId="409">
    <graphics z="0.0" y="20.205056742639464" x="-198.9301111939796">
      <att name="lockedVisualProperties" type="list" cy:type="List">
        <att name="NODE_LABEL" value="" type="string" cy:type="String"/>
      </att>
    </graphics>
  </node>
  <node id="46009" label="ENSMUSG00000027358" cy:nodeId="410">
    <graphics z="0.0" y="-73.7426140942398" x="151.869984294573">
      <att name="lockedVisualProperties" type="list" cy:type="List">
        <att name="NODE_LABEL" value="" type="string" cy:type="String"/>
      </att>
    </graphics>
  </node>
  <node id="46008" label="ENSMUSG00000027379" cy:nodeId="411">
    <graphics z="0.0" y="453.76552646972505" x="-64.13502058823951">
      <att name="lockedVisualProperties" type="list" cy:type="List">
        <att name="NODE_LABEL" value="" type="string" cy:type="String"/>
      </att>
    </graphics>
  </node>
  <node id="46007" label="ENSMUSG00000027420" cy:nodeId="412">
    <graphics z="0.0" y="60.858658488768015" x="132.66336884657494">
      <att name="lockedVisualProperties" type="list" cy:type="List">
        <att name="NODE_LABEL" value="" type="string" cy:type="String"/>
      </att>
    </graphics>
  </node>
  <node id="46006" label="ENSMUSG00000027469" cy:nodeId="413">
    <graphics z="0.0" y="253.18914097167817" x="88.52982011000267">
      <att name="lockedVisualProperties" type="list" cy:type="List">
        <att name="NODE_LABEL" value="" type="string" cy:type="String"/>
      </att>
    </graphics>
  </node>
  <node id="46005" label="ENSMUSG00000027499" cy:nodeId="414">
    <graphics z="0.0" y="-11.74763423584136" x="-40.8126786692942">
      <att name="lockedVisualProperties" type="list" cy:type="List">
        <att name="NODE_LABEL" value="" type="string" cy:type="String"/>
      </att>
    </graphics>
  </node>
  <node id="46004" label="ENSMUSG00000027514" cy:nodeId="415">
    <graphics z="0.0" y="300.7671744189438" x="125.04699387709252">
      <att name="lockedVisualProperties" type="list" cy:type="List">
        <att name="NODE_LABEL" value="" type="string" cy:type="String"/>
      </att>
    </graphics>
  </node>
  <node id="46003" label="ENSMUSG00000027534" cy:nodeId="416">
    <graphics z="0.0" y="163.10279148437348" x="52.734593059221424">
      <att name="lockedVisualProperties" type="list" cy:type="List">
        <att name="NODE_LABEL" value="" type="string" cy:type="String"/>
      </att>
    </graphics>
  </node>
  <node id="46002" label="ENSMUSG00000027654" cy:nodeId="417">
    <graphics z="0.0" y="185.38799351074067" x="303.66665330092064">
      <att name="lockedVisualProperties" type="list" cy:type="List">
        <att name="NODE_LABEL" value="" type="string" cy:type="String"/>
      </att>
    </graphics>
  </node>
  <node id="46001" label="ENSMUSG00000027661" cy:nodeId="418">
    <graphics z="0.0" y="200.2729880175766" x="210.3204885975515">
      <att name="lockedVisualProperties" type="list" cy:type="List">
        <att name="NODE_LABEL" value="" type="string" cy:type="String"/>
      </att>
    </graphics>
  </node>
  <node id="46000" label="ENSMUSG00000027698" cy:nodeId="419">
    <graphics z="0.0" y="-231.10251552246245" x="-152.10506758530983">
      <att name="lockedVisualProperties" type="list" cy:type="List">
        <att name="NODE_LABEL" value="" type="string" cy:type="String"/>
      </att>
    </graphics>
  </node>
  <node id="45999" label="ENSMUSG00000027715" cy:nodeId="420">
    <graphics z="0.0" y="-168.19126063964995" x="56.977703715959706">
      <att name="lockedVisualProperties" type="list" cy:type="List">
        <att name="NODE_LABEL" value="" type="string" cy:type="String"/>
      </att>
    </graphics>
  </node>
  <node id="45998" label="ENSMUSG00000027746" cy:nodeId="421">
    <graphics z="0.0" y="92.71021335937348" x="-64.15612349351295">
      <att name="lockedVisualProperties" type="list" cy:type="List">
        <att name="NODE_LABEL" value="" type="string" cy:type="String"/>
      </att>
    </graphics>
  </node>
  <node id="45997" label="ENSMUSG00000027750" cy:nodeId="422">
    <graphics z="0.0" y="-111.90689021728667" x="-63.15421614488014">
      <att name="lockedVisualProperties" type="list" cy:type="List">
        <att name="NODE_LABEL" value="" type="string" cy:type="String"/>
      </att>
    </graphics>
  </node>
  <node id="45996" label="ENSMUSG00000027834" cy:nodeId="423">
    <graphics z="0.0" y="-62.88486606262359" x="-130.64037642320045">
      <att name="lockedVisualProperties" type="list" cy:type="List">
        <att name="NODE_LABEL" value="" type="string" cy:type="String"/>
      </att>
    </graphics>
  </node>
  <node id="45995" label="ENSMUSG00000027883" cy:nodeId="424">
    <graphics z="0.0" y="37.81749790527192" x="254.8224760548269">
      <att name="lockedVisualProperties" type="list" cy:type="List">
        <att name="NODE_LABEL" value="" type="string" cy:type="String"/>
      </att>
    </graphics>
  </node>
  <node id="45994" label="ENSMUSG00000027890" cy:nodeId="425">
    <graphics z="0.0" y="93.96324985839692" x="-78.04096541245826">
      <att name="lockedVisualProperties" type="list" cy:type="List">
        <att name="NODE_LABEL" value="" type="string" cy:type="String"/>
      </att>
    </graphics>
  </node>
  <node id="45993" label="ENSMUSG00000027907" cy:nodeId="426">
    <graphics z="0.0" y="292.38481968261567" x="-248.65648970445045">
      <att name="lockedVisualProperties" type="list" cy:type="List">
        <att name="NODE_LABEL" value="" type="string" cy:type="String"/>
      </att>
    </graphics>
  </node>
  <node id="45992" label="ENSMUSG00000027931" cy:nodeId="427">
    <graphics z="0.0" y="62.75916355468598" x="213.22308030287377">
      <att name="lockedVisualProperties" type="list" cy:type="List">
        <att name="NODE_LABEL" value="" type="string" cy:type="String"/>
      </att>
    </graphics>
  </node>
  <node id="45991" label="ENSMUSG00000027938" cy:nodeId="428">
    <graphics z="0.0" y="-293.7082894482437" x="343.1429182545339">
      <att name="lockedVisualProperties" type="list" cy:type="List">
        <att name="NODE_LABEL" value="" type="string" cy:type="String"/>
      </att>
    </graphics>
  </node>
  <node id="45990" label="ENSMUSG00000027954" cy:nodeId="429">
    <graphics z="0.0" y="-5.586177174073782" x="158.61192574659935">
      <att name="lockedVisualProperties" type="list" cy:type="List">
        <att name="NODE_LABEL" value="" type="string" cy:type="String"/>
      </att>
    </graphics>
  </node>
  <node id="45989" label="ENSMUSG00000027995" cy:nodeId="430">
    <graphics z="0.0" y="146.67803257324067" x="133.50090470472924">
      <att name="lockedVisualProperties" type="list" cy:type="List">
        <att name="NODE_LABEL" value="" type="string" cy:type="String"/>
      </att>
    </graphics>
  </node>
  <node id="45988" label="ENSMUSG00000028186" cy:nodeId="431">
    <graphics z="0.0" y="-118.40454036377105" x="162.512655879656">
      <att name="lockedVisualProperties" type="list" cy:type="List">
        <att name="NODE_LABEL" value="" type="string" cy:type="String"/>
      </att>
    </graphics>
  </node>
  <node id="45987" label="ENSMUSG00000028211" cy:nodeId="432">
    <graphics z="0.0" y="9.513355906980905" x="-152.30175337632545">
      <att name="lockedVisualProperties" type="list" cy:type="List">
        <att name="NODE_LABEL" value="" type="string" cy:type="String"/>
      </att>
    </graphics>
  </node>
  <node id="45986" label="ENSMUSG00000028246" cy:nodeId="433">
    <graphics z="0.0" y="-206.18193751953277" x="-129.11312422593483">
      <att name="lockedVisualProperties" type="list" cy:type="List">
        <att name="NODE_LABEL" value="" type="string" cy:type="String"/>
      </att>
    </graphics>
  </node>
  <node id="45985" label="ENSMUSG00000028289" cy:nodeId="434">
    <graphics z="0.0" y="-23.121430698854056" x="-199.7993730052317">
      <att name="lockedVisualProperties" type="list" cy:type="List">
        <att name="NODE_LABEL" value="" type="string" cy:type="String"/>
      </att>
    </graphics>
  </node>
  <node id="45984" label="ENSMUSG00000028312" cy:nodeId="435">
    <graphics z="0.0" y="35.03568333007661" x="-49.28202376206764">
      <att name="lockedVisualProperties" type="list" cy:type="List">
        <att name="NODE_LABEL" value="" type="string" cy:type="String"/>
      </att>
    </graphics>
  </node>
  <node id="45983" label="ENSMUSG00000028341" cy:nodeId="436">
    <graphics z="0.0" y="-6.43537837646636" x="-6.4260819896067005">
      <att name="lockedVisualProperties" type="list" cy:type="List">
        <att name="NODE_LABEL" value="" type="string" cy:type="String"/>
      </att>
    </graphics>
  </node>
  <node id="45982" label="ENSMUSG00000028435" cy:nodeId="437">
    <graphics z="0.0" y="318.5272147021469" x="-255.8129228099192">
      <att name="lockedVisualProperties" type="list" cy:type="List">
        <att name="NODE_LABEL" value="" type="string" cy:type="String"/>
      </att>
    </graphics>
  </node>
  <node id="45981" label="ENSMUSG00000028438" cy:nodeId="438">
    <graphics z="0.0" y="-309.8968880810562" x="175.04622330824486">
      <att name="lockedVisualProperties" type="list" cy:type="List">
        <att name="NODE_LABEL" value="" type="string" cy:type="String"/>
      </att>
    </graphics>
  </node>
  <node id="45980" label="ENSMUSG00000028439" cy:nodeId="439">
    <graphics z="0.0" y="-126.01830226562652" x="-11.0325273021067">
      <att name="lockedVisualProperties" type="list" cy:type="List">
        <att name="NODE_LABEL" value="" type="string" cy:type="String"/>
      </att>
    </graphics>
  </node>
  <node id="45979" label="ENSMUSG00000028444" cy:nodeId="440">
    <graphics z="0.0" y="396.4770438037094" x="25.703236247697987">
      <att name="lockedVisualProperties" type="list" cy:type="List">
        <att name="NODE_LABEL" value="" type="string" cy:type="String"/>
      </att>
    </graphics>
  </node>
  <node id="45978" label="ENSMUSG00000028517" cy:nodeId="441">
    <graphics z="0.0" y="-213.09941798828277" x="70.8316084400808">
      <att name="lockedVisualProperties" type="list" cy:type="List">
        <att name="NODE_LABEL" value="" type="string" cy:type="String"/>
      </att>
    </graphics>
  </node>
  <node id="45977" label="ENSMUSG00000028542" cy:nodeId="442">
    <graphics z="0.0" y="120.2896353564438" x="36.41907181898705">
      <att name="lockedVisualProperties" type="list" cy:type="List">
        <att name="NODE_LABEL" value="" type="string" cy:type="String"/>
      </att>
    </graphics>
  </node>
  <node id="45976" label="ENSMUSG00000028557" cy:nodeId="443">
    <graphics z="0.0" y="30.714966472166452" x="111.23964371840111">
      <att name="lockedVisualProperties" type="list" cy:type="List">
        <att name="NODE_LABEL" value="" type="string" cy:type="String"/>
      </att>
    </graphics>
  </node>
  <node id="45975" label="ENSMUSG00000028576" cy:nodeId="444">
    <graphics z="0.0" y="106.31623142577973" x="-105.0555985911692">
      <att name="lockedVisualProperties" type="list" cy:type="List">
        <att name="NODE_LABEL" value="" type="string" cy:type="String"/>
      </att>
    </graphics>
  </node>
  <node id="45974" label="ENSMUSG00000028602" cy:nodeId="445">
    <graphics z="0.0" y="-49.745497051698294" x="101.94810166517846">
      <att name="lockedVisualProperties" type="list" cy:type="List">
        <att name="NODE_LABEL" value="" type="string" cy:type="String"/>
      </att>
    </graphics>
  </node>
  <node id="45973" label="ENSMUSG00000028634" cy:nodeId="446">
    <graphics z="0.0" y="-11.355336491090384" x="81.30917802015892">
      <att name="lockedVisualProperties" type="list" cy:type="List">
        <att name="NODE_LABEL" value="" type="string" cy:type="String"/>
      </att>
    </graphics>
  </node>
  <node id="45972" label="ENSMUSG00000028641" cy:nodeId="447">
    <graphics z="0.0" y="-235.69969875000152" x="-8.047389362653576">
      <att name="lockedVisualProperties" type="list" cy:type="List">
        <att name="NODE_LABEL" value="" type="string" cy:type="String"/>
      </att>
    </graphics>
  </node>
  <node id="45971" label="ENSMUSG00000028702" cy:nodeId="448">
    <graphics z="0.0" y="132.0195700488266" x="-67.87740645249733">
      <att name="lockedVisualProperties" type="list" cy:type="List">
        <att name="NODE_LABEL" value="" type="string" cy:type="String"/>
      </att>
    </graphics>
  </node>
  <node id="45970" label="ENSMUSG00000028713" cy:nodeId="449">
    <graphics z="0.0" y="-14.13328105590972" x="395.2361799732839">
      <att name="lockedVisualProperties" type="list" cy:type="List">
        <att name="NODE_LABEL" value="" type="string" cy:type="String"/>
      </att>
    </graphics>
  </node>
  <node id="45969" label="ENSMUSG00000028716" cy:nodeId="450">
    <graphics z="0.0" y="-32.383765522462454" x="-31.57628950913795">
      <att name="lockedVisualProperties" type="list" cy:type="List">
        <att name="NODE_LABEL" value="" type="string" cy:type="String"/>
      </att>
    </graphics>
  </node>
  <node id="45968" label="ENSMUSG00000028747" cy:nodeId="451">
    <graphics z="0.0" y="469.9728628955063" x="-553.7951310618723">
      <att name="lockedVisualProperties" type="list" cy:type="List">
        <att name="NODE_LABEL" value="" type="string" cy:type="String"/>
      </att>
    </graphics>
  </node>
  <node id="45967" label="ENSMUSG00000028749" cy:nodeId="452">
    <graphics z="0.0" y="-0.2921708264175322" x="294.7903028980886">
      <att name="lockedVisualProperties" type="list" cy:type="List">
        <att name="NODE_LABEL" value="" type="string" cy:type="String"/>
      </att>
    </graphics>
  </node>
  <node id="45966" label="ENSMUSG00000028763" cy:nodeId="453">
    <graphics z="0.0" y="-127.2322152294937" x="-8.497279499372326">
      <att name="lockedVisualProperties" type="list" cy:type="List">
        <att name="NODE_LABEL" value="" type="string" cy:type="String"/>
      </att>
    </graphics>
  </node>
  <node id="45965" label="ENSMUSG00000028849" cy:nodeId="454">
    <graphics z="0.0" y="-74.70993739746245" x="56.588596965471424">
      <att name="lockedVisualProperties" type="list" cy:type="List">
        <att name="NODE_LABEL" value="" type="string" cy:type="String"/>
      </att>
    </graphics>
  </node>
  <node id="45964" label="ENSMUSG00000028940" cy:nodeId="455">
    <graphics z="0.0" y="281.4501578173813" x="139.78284135023705">
      <att name="lockedVisualProperties" type="list" cy:type="List">
        <att name="NODE_LABEL" value="" type="string" cy:type="String"/>
      </att>
    </graphics>
  </node>
  <node id="45963" label="ENSMUSG00000028943" cy:nodeId="456">
    <graphics z="0.0" y="-144.15693599365386" x="-19.691691730817638">
      <att name="lockedVisualProperties" type="list" cy:type="List">
        <att name="NODE_LABEL" value="" type="string" cy:type="String"/>
      </att>
    </graphics>
  </node>
  <node id="45962" label="ENSMUSG00000029059" cy:nodeId="457">
    <graphics z="0.0" y="-37.166644398194876" x="-30.830912922223888">
      <att name="lockedVisualProperties" type="list" cy:type="List">
        <att name="NODE_LABEL" value="" type="string" cy:type="String"/>
      </att>
    </graphics>
  </node>
  <node id="45961" label="ENSMUSG00000029094" cy:nodeId="458">
    <graphics z="0.0" y="13.382382091062937" x="94.29939713636986">
      <att name="lockedVisualProperties" type="list" cy:type="List">
        <att name="NODE_LABEL" value="" type="string" cy:type="String"/>
      </att>
    </graphics>
  </node>
  <node id="45960" label="ENSMUSG00000029095" cy:nodeId="459">
    <graphics z="0.0" y="114.13456028320161" x="111.73334946791283">
      <att name="lockedVisualProperties" type="list" cy:type="List">
        <att name="NODE_LABEL" value="" type="string" cy:type="String"/>
      </att>
    </graphics>
  </node>
  <node id="45959" label="ENSMUSG00000029153" cy:nodeId="460">
    <graphics z="0.0" y="144.44768589355317" x="-275.3198503001536">
      <att name="lockedVisualProperties" type="list" cy:type="List">
        <att name="NODE_LABEL" value="" type="string" cy:type="String"/>
      </att>
    </graphics>
  </node>
  <node id="45958" label="ENSMUSG00000029154" cy:nodeId="461">
    <graphics z="0.0" y="408.59343784667817" x="-42.66373762925514">
      <att name="lockedVisualProperties" type="list" cy:type="List">
        <att name="NODE_LABEL" value="" type="string" cy:type="String"/>
      </att>
    </graphics>
  </node>
  <node id="45957" label="ENSMUSG00000029161" cy:nodeId="462">
    <graphics z="0.0" y="-332.98166591308745" x="163.30957665602318">
      <att name="lockedVisualProperties" type="list" cy:type="List">
        <att name="NODE_LABEL" value="" type="string" cy:type="String"/>
      </att>
    </graphics>
  </node>
  <node id="45956" label="ENSMUSG00000029168" cy:nodeId="463">
    <graphics z="0.0" y="-176.91759425781402" x="-164.8619950755442">
      <att name="lockedVisualProperties" type="list" cy:type="List">
        <att name="NODE_LABEL" value="" type="string" cy:type="String"/>
      </att>
    </graphics>
  </node>
  <node id="45955" label="ENSMUSG00000029177" cy:nodeId="464">
    <graphics z="0.0" y="204.52367466308442" x="256.6734739796316">
      <att name="lockedVisualProperties" type="list" cy:type="List">
        <att name="NODE_LABEL" value="" type="string" cy:type="String"/>
      </att>
    </graphics>
  </node>
  <node id="45954" label="ENSMUSG00000029330" cy:nodeId="465">
    <graphics z="0.0" y="-118.61385280273589" x="273.90794053236596">
      <att name="lockedVisualProperties" type="list" cy:type="List">
        <att name="NODE_LABEL" value="" type="string" cy:type="String"/>
      </att>
    </graphics>
  </node>
  <node id="45953" label="ENSMUSG00000029484" cy:nodeId="466">
    <graphics z="0.0" y="48.92272251464692" x="-50.97431502183326">
      <att name="lockedVisualProperties" type="list" cy:type="List">
        <att name="NODE_LABEL" value="" type="string" cy:type="String"/>
      </att>
    </graphics>
  </node>
  <node id="45952" label="ENSMUSG00000029521" cy:nodeId="467">
    <graphics z="0.0" y="261.9475027880844" x="190.1090456501638">
      <att name="lockedVisualProperties" type="list" cy:type="List">
        <att name="NODE_LABEL" value="" type="string" cy:type="String"/>
      </att>
    </graphics>
  </node>
  <node id="45951" label="ENSMUSG00000029560" cy:nodeId="468">
    <graphics z="0.0" y="204.78867405273286" x="202.6623255268728">
      <att name="lockedVisualProperties" type="list" cy:type="List">
        <att name="NODE_LABEL" value="" type="string" cy:type="String"/>
      </att>
    </graphics>
  </node>
  <node id="45950" label="ENSMUSG00000029601" cy:nodeId="469">
    <graphics z="0.0" y="-38.30299789093169" x="326.1020399586355">
      <att name="lockedVisualProperties" type="list" cy:type="List">
        <att name="NODE_LABEL" value="" type="string" cy:type="String"/>
      </att>
    </graphics>
  </node>
  <node id="45949" label="ENSMUSG00000029644" cy:nodeId="470">
    <graphics z="0.0" y="39.45413273193208" x="49.92302384535424">
      <att name="lockedVisualProperties" type="list" cy:type="List">
        <att name="NODE_LABEL" value="" type="string" cy:type="String"/>
      </att>
    </graphics>
  </node>
  <node id="45948" label="ENSMUSG00000029674" cy:nodeId="471">
    <graphics z="0.0" y="-186.20238429687652" x="208.43070283094994">
      <att name="lockedVisualProperties" type="list" cy:type="List">
        <att name="NODE_LABEL" value="" type="string" cy:type="String"/>
      </att>
    </graphics>
  </node>
  <node id="45947" label="ENSMUSG00000029712" cy:nodeId="472">
    <graphics z="0.0" y="58.10031193115083" x="234.74878373304955">
      <att name="lockedVisualProperties" type="list" cy:type="List">
        <att name="NODE_LABEL" value="" type="string" cy:type="String"/>
      </att>
    </graphics>
  </node>
  <node id="45946" label="ENSMUSG00000029769" cy:nodeId="473">
    <graphics z="0.0" y="59.67898624755708" x="-218.01024947007545">
      <att name="lockedVisualProperties" type="list" cy:type="List">
        <att name="NODE_LABEL" value="" type="string" cy:type="String"/>
      </att>
    </graphics>
  </node>
  <node id="45945" label="ENSMUSG00000029772" cy:nodeId="474">
    <graphics z="0.0" y="-105.38239223144683" x="-21.939235065778576">
      <att name="lockedVisualProperties" type="list" cy:type="List">
        <att name="NODE_LABEL" value="" type="string" cy:type="String"/>
      </att>
    </graphics>
  </node>
  <node id="45944" label="ENSMUSG00000029814" cy:nodeId="475">
    <graphics z="0.0" y="137.10341709472505" x="270.459095622698">
      <att name="lockedVisualProperties" type="list" cy:type="List">
        <att name="NODE_LABEL" value="" type="string" cy:type="String"/>
      </att>
    </graphics>
  </node>
  <node id="45943" label="ENSMUSG00000029847" cy:nodeId="476">
    <graphics z="0.0" y="45.90725773193208" x="-34.1619218333567">
      <att name="lockedVisualProperties" type="list" cy:type="List">
        <att name="NODE_LABEL" value="" type="string" cy:type="String"/>
      </att>
    </graphics>
  </node>
  <node id="45942" label="ENSMUSG00000029910" cy:nodeId="477">
    <graphics z="0.0" y="-98.79799586914214" x="103.09730973402611">
      <att name="lockedVisualProperties" type="list" cy:type="List">
        <att name="NODE_LABEL" value="" type="string" cy:type="String"/>
      </att>
    </graphics>
  </node>
  <node id="45941" label="ENSMUSG00000029919" cy:nodeId="478">
    <graphics z="0.0" y="126.93579929687348" x="-235.66189131577858">
      <att name="lockedVisualProperties" type="list" cy:type="List">
        <att name="NODE_LABEL" value="" type="string" cy:type="String"/>
      </att>
    </graphics>
  </node>
  <node id="45940" label="ENSMUSG00000030074" cy:nodeId="479">
    <graphics z="0.0" y="-97.88896114013824" x="-383.6730607493723">
      <att name="lockedVisualProperties" type="list" cy:type="List">
        <att name="NODE_LABEL" value="" type="string" cy:type="String"/>
      </att>
    </graphics>
  </node>
  <node id="45939" label="ENSMUSG00000030087" cy:nodeId="480">
    <graphics z="0.0" y="193.1371695361313" x="-130.26375899155983">
      <att name="lockedVisualProperties" type="list" cy:type="List">
        <att name="NODE_LABEL" value="" type="string" cy:type="String"/>
      </att>
    </graphics>
  </node>
  <node id="45938" label="ENSMUSG00000030107" cy:nodeId="481">
    <graphics z="0.0" y="38.09575718261567" x="242.58347764174096">
      <att name="lockedVisualProperties" type="list" cy:type="List">
        <att name="NODE_LABEL" value="" type="string" cy:type="String"/>
      </att>
    </graphics>
  </node>
  <node id="45937" label="ENSMUSG00000030110" cy:nodeId="482">
    <graphics z="0.0" y="-298.95151454589995" x="-108.37722334702858">
      <att name="lockedVisualProperties" type="list" cy:type="List">
        <att name="NODE_LABEL" value="" type="string" cy:type="String"/>
      </att>
    </graphics>
  </node>
  <node id="45936" label="ENSMUSG00000030137" cy:nodeId="483">
    <graphics z="0.0" y="-77.53605586670074" x="290.9428831593191">
      <att name="lockedVisualProperties" type="list" cy:type="List">
        <att name="NODE_LABEL" value="" type="string" cy:type="String"/>
      </att>
    </graphics>
  </node>
  <node id="45935" label="ENSMUSG00000030329" cy:nodeId="484">
    <graphics z="0.0" y="278.4162222705063" x="-175.70302901109108">
      <att name="lockedVisualProperties" type="list" cy:type="List">
        <att name="NODE_LABEL" value="" type="string" cy:type="String"/>
      </att>
    </graphics>
  </node>
  <node id="45934" label="ENSMUSG00000030410" cy:nodeId="485">
    <graphics z="0.0" y="233.24526279785005" x="3.315540935197987">
      <att name="lockedVisualProperties" type="list" cy:type="List">
        <att name="NODE_LABEL" value="" type="string" cy:type="String"/>
      </att>
    </graphics>
  </node>
  <node id="45933" label="ENSMUSG00000030510" cy:nodeId="486">
    <graphics z="0.0" y="-199.92937404297027" x="217.75131669203392">
      <att name="lockedVisualProperties" type="list" cy:type="List">
        <att name="NODE_LABEL" value="" type="string" cy:type="String"/>
      </att>
    </graphics>
  </node>
  <node id="45932" label="ENSMUSG00000030518" cy:nodeId="487">
    <graphics z="0.0" y="63.02507847167817" x="-433.8330949290598">
      <att name="lockedVisualProperties" type="list" cy:type="List">
        <att name="NODE_LABEL" value="" type="string" cy:type="String"/>
      </att>
    </graphics>
  </node>
  <node id="45931" label="ENSMUSG00000030643" cy:nodeId="488">
    <graphics z="0.0" y="-80.81116801880034" x="327.5719191090261">
      <att name="lockedVisualProperties" type="list" cy:type="List">
        <att name="NODE_LABEL" value="" type="string" cy:type="String"/>
      </att>
    </graphics>
  </node>
  <node id="45930" label="ENSMUSG00000030659" cy:nodeId="489">
    <graphics z="0.0" y="290.12563389160005" x="281.26565232435814">
      <att name="lockedVisualProperties" type="list" cy:type="List">
        <att name="NODE_LABEL" value="" type="string" cy:type="String"/>
      </att>
    </graphics>
  </node>
  <node id="45929" label="ENSMUSG00000030747" cy:nodeId="490">
    <graphics z="0.0" y="-18.896803204042044" x="-95.2471269114817">
      <att name="lockedVisualProperties" type="list" cy:type="List">
        <att name="NODE_LABEL" value="" type="string" cy:type="String"/>
      </att>
    </graphics>
  </node>
  <node id="45928" label="ENSMUSG00000030769" cy:nodeId="491">
    <graphics z="0.0" y="117.38079136230317" x="226.38926377455346">
      <att name="lockedVisualProperties" type="list" cy:type="List">
        <att name="NODE_LABEL" value="" type="string" cy:type="String"/>
      </att>
    </graphics>
  </node>
  <node id="45927" label="ENSMUSG00000030772" cy:nodeId="492">
    <graphics z="0.0" y="254.72472446777192" x="-175.05977949937233">
      <att name="lockedVisualProperties" type="list" cy:type="List">
        <att name="NODE_LABEL" value="" type="string" cy:type="String"/>
      </att>
    </graphics>
  </node>
  <node id="45926" label="ENSMUSG00000030878" cy:nodeId="493">
    <graphics z="0.0" y="285.39382236816255" x="-433.2489274485911">
      <att name="lockedVisualProperties" type="list" cy:type="List">
        <att name="NODE_LABEL" value="" type="string" cy:type="String"/>
      </att>
    </graphics>
  </node>
  <node id="45925" label="ENSMUSG00000031004" cy:nodeId="494">
    <graphics z="0.0" y="-136.9552376904312" x="-13.891124103864513">
      <att name="lockedVisualProperties" type="list" cy:type="List">
        <att name="NODE_LABEL" value="" type="string" cy:type="String"/>
      </att>
    </graphics>
  </node>
  <node id="45924" label="ENSMUSG00000031098" cy:nodeId="495">
    <graphics z="0.0" y="183.46157139160005" x="30.259251262346424">
      <att name="lockedVisualProperties" type="list" cy:type="List">
        <att name="NODE_LABEL" value="" type="string" cy:type="String"/>
      </att>
    </graphics>
  </node>
  <node id="45923" label="ENSMUSG00000031144" cy:nodeId="496">
    <graphics z="0.0" y="379.0430533251938" x="-240.86718306382545">
      <att name="lockedVisualProperties" type="list" cy:type="List">
        <att name="NODE_LABEL" value="" type="string" cy:type="String"/>
      </att>
    </graphics>
  </node>
  <node id="45922" label="ENSMUSG00000031155" cy:nodeId="497">
    <graphics z="0.0" y="-183.01282436035308" x="251.86260667006127">
      <att name="lockedVisualProperties" type="list" cy:type="List">
        <att name="NODE_LABEL" value="" type="string" cy:type="String"/>
      </att>
    </graphics>
  </node>
  <node id="45921" label="ENSMUSG00000031214" cy:nodeId="498">
    <graphics z="0.0" y="-150.44233638427886" x="-264.8196061595286">
      <att name="lockedVisualProperties" type="list" cy:type="List">
        <att name="NODE_LABEL" value="" type="string" cy:type="String"/>
      </att>
    </graphics>
  </node>
  <node id="45920" label="ENSMUSG00000031220" cy:nodeId="499">
    <graphics z="0.0" y="29.47469776489106" x="330.36975541273705">
      <att name="lockedVisualProperties" type="list" cy:type="List">
        <att name="NODE_LABEL" value="" type="string" cy:type="String"/>
      </att>
    </graphics>
  </node>
  <node id="45919" label="ENSMUSG00000031328" cy:nodeId="500">
    <graphics z="0.0" y="2.142548259275827" x="174.85016217390648">
      <att name="lockedVisualProperties" type="list" cy:type="List">
        <att name="NODE_LABEL" value="" type="string" cy:type="String"/>
      </att>
    </graphics>
  </node>
  <node id="45918" label="ENSMUSG00000031353" cy:nodeId="501">
    <graphics z="0.0" y="-159.60509425781402" x="-84.96578535874733">
      <att name="lockedVisualProperties" type="list" cy:type="List">
        <att name="NODE_LABEL" value="" type="string" cy:type="String"/>
      </att>
    </graphics>
  </node>
  <node id="45917" label="ENSMUSG00000031373" cy:nodeId="502">
    <graphics z="0.0" y="341.31121128417817" x="87.9361235157644">
      <att name="lockedVisualProperties" type="list" cy:type="List">
        <att name="NODE_LABEL" value="" type="string" cy:type="String"/>
      </att>
    </graphics>
  </node>
  <node id="45916" label="ENSMUSG00000031381" cy:nodeId="503">
    <graphics z="0.0" y="229.42592686035005" x="250.43789353529564">
      <att name="lockedVisualProperties" type="list" cy:type="List">
        <att name="NODE_LABEL" value="" type="string" cy:type="String"/>
      </att>
    </graphics>
  </node>
  <node id="45915" label="ENSMUSG00000031387" cy:nodeId="504">
    <graphics z="0.0" y="307.15996616699067" x="-294.8172868235911">
      <att name="lockedVisualProperties" type="list" cy:type="List">
        <att name="NODE_LABEL" value="" type="string" cy:type="String"/>
      </att>
    </graphics>
  </node>
  <node id="45914" label="ENSMUSG00000031441" cy:nodeId="505">
    <graphics z="0.0" y="-168.3795998730484" x="-43.082850788434826">
      <att name="lockedVisualProperties" type="list" cy:type="List">
        <att name="NODE_LABEL" value="" type="string" cy:type="String"/>
      </att>
    </graphics>
  </node>
  <node id="45913" label="ENSMUSG00000031453" cy:nodeId="506">
    <graphics z="0.0" y="117.70262974120942" x="-83.19362959702858">
      <att name="lockedVisualProperties" type="list" cy:type="List">
        <att name="NODE_LABEL" value="" type="string" cy:type="String"/>
      </att>
    </graphics>
  </node>
  <node id="45912" label="ENSMUSG00000031538" cy:nodeId="507">
    <graphics z="0.0" y="-143.78154689453277" x="-184.26339278062233">
      <att name="lockedVisualProperties" type="list" cy:type="List">
        <att name="NODE_LABEL" value="" type="string" cy:type="String"/>
      </att>
    </graphics>
  </node>
  <node id="45911" label="ENSMUSG00000031562" cy:nodeId="508">
    <graphics z="0.0" y="-46.38847476623687" x="37.21580948988549">
      <att name="lockedVisualProperties" type="list" cy:type="List">
        <att name="NODE_LABEL" value="" type="string" cy:type="String"/>
      </att>
    </graphics>
  </node>
  <node id="45910" label="ENSMUSG00000031586" cy:nodeId="509">
    <graphics z="0.0" y="-143.38334590576324" x="272.7079512135183">
      <att name="lockedVisualProperties" type="list" cy:type="List">
        <att name="NODE_LABEL" value="" type="string" cy:type="String"/>
      </att>
    </graphics>
  </node>
  <node id="45909" label="ENSMUSG00000031617" cy:nodeId="510">
    <graphics z="0.0" y="-109.73374110839995" x="308.25139298597924">
      <att name="lockedVisualProperties" type="list" cy:type="List">
        <att name="NODE_LABEL" value="" type="string" cy:type="String"/>
      </att>
    </graphics>
  </node>
  <node id="45908" label="ENSMUSG00000031626" cy:nodeId="511">
    <graphics z="0.0" y="-229.82031947754058" x="-71.52170882066139">
      <att name="lockedVisualProperties" type="list" cy:type="List">
        <att name="NODE_LABEL" value="" type="string" cy:type="String"/>
      </att>
    </graphics>
  </node>
  <node id="45907" label="ENSMUSG00000031629" cy:nodeId="512">
    <graphics z="0.0" y="201.33069675781098" x="-105.01571211655983">
      <att name="lockedVisualProperties" type="list" cy:type="List">
        <att name="NODE_LABEL" value="" type="string" cy:type="String"/>
      </att>
    </graphics>
  </node>
  <node id="45906" label="ENSMUSG00000031647" cy:nodeId="513">
    <graphics z="0.0" y="-189.28569728515777" x="-49.320033405622326">
      <att name="lockedVisualProperties" type="list" cy:type="List">
        <att name="NODE_LABEL" value="" type="string" cy:type="String"/>
      </att>
    </graphics>
  </node>
  <node id="45905" label="ENSMUSG00000031661" cy:nodeId="514">
    <graphics z="0.0" y="266.3685232958969" x="207.23705544630639">
      <att name="lockedVisualProperties" type="list" cy:type="List">
        <att name="NODE_LABEL" value="" type="string" cy:type="String"/>
      </att>
    </graphics>
  </node>
  <node id="45904" label="ENSMUSG00000031668" cy:nodeId="515">
    <graphics z="0.0" y="-248.2323372998062" x="135.24280228773705">
      <att name="lockedVisualProperties" type="list" cy:type="List">
        <att name="NODE_LABEL" value="" type="string" cy:type="String"/>
      </att>
    </graphics>
  </node>
  <node id="45903" label="ENSMUSG00000031788" cy:nodeId="516">
    <graphics z="0.0" y="-42.91114837310943" x="92.28590836683861">
      <att name="lockedVisualProperties" type="list" cy:type="List">
        <att name="NODE_LABEL" value="" type="string" cy:type="String"/>
      </att>
    </graphics>
  </node>
  <node id="45902" label="ENSMUSG00000031790" cy:nodeId="517">
    <graphics z="0.0" y="-14.43427974365386" x="30.860340739885487">
      <att name="lockedVisualProperties" type="list" cy:type="List">
        <att name="NODE_LABEL" value="" type="string" cy:type="String"/>
      </att>
    </graphics>
  </node>
  <node id="45901" label="ENSMUSG00000031827" cy:nodeId="518">
    <graphics z="0.0" y="320.7747427783188" x="-6.119822834333263">
      <att name="lockedVisualProperties" type="list" cy:type="List">
        <att name="NODE_LABEL" value="" type="string" cy:type="String"/>
      </att>
    </graphics>
  </node>
  <node id="45900" label="ENSMUSG00000031845" cy:nodeId="519">
    <graphics z="0.0" y="283.81044834472505" x="-207.83510908921608">
      <att name="lockedVisualProperties" type="list" cy:type="List">
        <att name="NODE_LABEL" value="" type="string" cy:type="String"/>
      </att>
    </graphics>
  </node>
  <node id="45899" label="ENSMUSG00000031903" cy:nodeId="520">
    <graphics z="0.0" y="149.06084507324067" x="90.87902512709252">
      <att name="lockedVisualProperties" type="list" cy:type="List">
        <att name="NODE_LABEL" value="" type="string" cy:type="String"/>
      </att>
    </graphics>
  </node>
  <node id="45898" label="ENSMUSG00000031925" cy:nodeId="521">
    <graphics z="0.0" y="123.34418552734223" x="116.33102860609642">
      <att name="lockedVisualProperties" type="list" cy:type="List">
        <att name="NODE_LABEL" value="" type="string" cy:type="String"/>
      </att>
    </graphics>
  </node>
  <node id="45897" label="ENSMUSG00000031951" cy:nodeId="522">
    <graphics z="0.0" y="-47.58390361450347" x="494.0411116139089">
      <att name="lockedVisualProperties" type="list" cy:type="List">
        <att name="NODE_LABEL" value="" type="string" cy:type="String"/>
      </att>
    </graphics>
  </node>
  <node id="45896" label="ENSMUSG00000031980" cy:nodeId="523">
    <graphics z="0.0" y="-428.79453212402495" x="127.2006155506765">
      <att name="lockedVisualProperties" type="list" cy:type="List">
        <att name="NODE_LABEL" value="" type="string" cy:type="String"/>
      </att>
    </graphics>
  </node>
  <node id="45895" label="ENSMUSG00000032017" cy:nodeId="524">
    <graphics z="0.0" y="341.8698660693344" x="-30.338298176130138">
      <att name="lockedVisualProperties" type="list" cy:type="List">
        <att name="NODE_LABEL" value="" type="string" cy:type="String"/>
      </att>
    </graphics>
  </node>
  <node id="45894" label="ENSMUSG00000032018" cy:nodeId="525">
    <graphics z="0.0" y="63.77454441406098" x="-131.05410322984108">
      <att name="lockedVisualProperties" type="list" cy:type="List">
        <att name="NODE_LABEL" value="" type="string" cy:type="String"/>
      </att>
    </graphics>
  </node>
  <node id="45893" label="ENSMUSG00000032202" cy:nodeId="526">
    <graphics z="0.0" y="-176.5718148388687" x="-291.8850663646067">
      <att name="lockedVisualProperties" type="list" cy:type="List">
        <att name="NODE_LABEL" value="" type="string" cy:type="String"/>
      </att>
    </graphics>
  </node>
  <node id="45892" label="ENSMUSG00000032238" cy:nodeId="527">
    <graphics z="0.0" y="61.08197849609223" x="19.60583939711205">
      <att name="lockedVisualProperties" type="list" cy:type="List">
        <att name="NODE_LABEL" value="" type="string" cy:type="String"/>
      </att>
    </graphics>
  </node>
  <node id="45891" label="ENSMUSG00000032245" cy:nodeId="528">
    <graphics z="0.0" y="21.843784984129343" x="238.61795487562767">
      <att name="lockedVisualProperties" type="list" cy:type="List">
        <att name="NODE_LABEL" value="" type="string" cy:type="String"/>
      </att>
    </graphics>
  </node>
  <node id="45890" label="ENSMUSG00000032294" cy:nodeId="529">
    <graphics z="0.0" y="233.1617056689438" x="-81.32006392320045">
      <att name="lockedVisualProperties" type="list" cy:type="List">
        <att name="NODE_LABEL" value="" type="string" cy:type="String"/>
      </att>
    </graphics>
  </node>
  <node id="45889" label="ENSMUSG00000032314" cy:nodeId="530">
    <graphics z="0.0" y="12.323193248289499" x="254.13992753187767">
      <att name="lockedVisualProperties" type="list" cy:type="List">
        <att name="NODE_LABEL" value="" type="string" cy:type="String"/>
      </att>
    </graphics>
  </node>
  <node id="45888" label="ENSMUSG00000032338" cy:nodeId="531">
    <graphics z="0.0" y="-296.00446254394683" x="120.8217436329519">
      <att name="lockedVisualProperties" type="list" cy:type="List">
        <att name="NODE_LABEL" value="" type="string" cy:type="String"/>
      </att>
    </graphics>
  </node>
  <node id="45887" label="ENSMUSG00000032356" cy:nodeId="532">
    <graphics z="0.0" y="232.9159781298813" x="230.60260834852807">
      <att name="lockedVisualProperties" type="list" cy:type="List">
        <att name="NODE_LABEL" value="" type="string" cy:type="String"/>
      </att>
    </graphics>
  </node>
  <node id="45886" label="ENSMUSG00000032358" cy:nodeId="533">
    <graphics z="0.0" y="205.8522574267563" x="-300.22228560288795">
      <att name="lockedVisualProperties" type="list" cy:type="List">
        <att name="NODE_LABEL" value="" type="string" cy:type="String"/>
      </att>
    </graphics>
  </node>
  <node id="45885" label="ENSMUSG00000032373" cy:nodeId="534">
    <graphics z="0.0" y="-49.54520446441802" x="-257.92333540757545">
      <att name="lockedVisualProperties" type="list" cy:type="List">
        <att name="NODE_LABEL" value="" type="string" cy:type="String"/>
      </att>
    </graphics>
  </node>
  <node id="45884" label="ENSMUSG00000032411" cy:nodeId="535">
    <graphics z="0.0" y="168.6055533251938" x="-130.85085615952858">
      <att name="lockedVisualProperties" type="list" cy:type="List">
        <att name="NODE_LABEL" value="" type="string" cy:type="String"/>
      </att>
    </graphics>
  </node>
  <node id="45883" label="ENSMUSG00000032417" cy:nodeId="536">
    <graphics z="0.0" y="82.91877811767426" x="-666.7453263743723">
      <att name="lockedVisualProperties" type="list" cy:type="List">
        <att name="NODE_LABEL" value="" type="string" cy:type="String"/>
      </att>
    </graphics>
  </node>
  <node id="45882" label="ENSMUSG00000032502" cy:nodeId="537">
    <graphics z="0.0" y="277.8683707080063" x="-166.83190474351295">
      <att name="lockedVisualProperties" type="list" cy:type="List">
        <att name="NODE_LABEL" value="" type="string" cy:type="String"/>
      </att>
    </graphics>
  </node>
  <node id="45881" label="ENSMUSG00000032528" cy:nodeId="538">
    <graphics z="0.0" y="126.84299534179536" x="470.8262678639089">
      <att name="lockedVisualProperties" type="list" cy:type="List">
        <att name="NODE_LABEL" value="" type="string" cy:type="String"/>
      </att>
    </graphics>
  </node>
  <node id="45880" label="ENSMUSG00000032531" cy:nodeId="539">
    <graphics z="0.0" y="-63.043170277101126" x="76.9601713673269">
      <att name="lockedVisualProperties" type="list" cy:type="List">
        <att name="NODE_LABEL" value="" type="string" cy:type="String"/>
      </att>
    </graphics>
  </node>
  <node id="45879" label="ENSMUSG00000032561" cy:nodeId="540">
    <graphics z="0.0" y="-259.9130013623062" x="-175.52697310288795">
      <att name="lockedVisualProperties" type="list" cy:type="List">
        <att name="NODE_LABEL" value="" type="string" cy:type="String"/>
      </att>
    </graphics>
  </node>
  <node id="45878" label="ENSMUSG00000032656" cy:nodeId="541">
    <graphics z="0.0" y="43.170067485350046" x="-93.55431685288795">
      <att name="lockedVisualProperties" type="list" cy:type="List">
        <att name="NODE_LABEL" value="" type="string" cy:type="String"/>
      </att>
    </graphics>
  </node>
  <node id="45877" label="ENSMUSG00000032666" cy:nodeId="542">
    <graphics z="0.0" y="195.76331394531098" x="93.98250260511986">
      <att name="lockedVisualProperties" type="list" cy:type="List">
        <att name="NODE_LABEL" value="" type="string" cy:type="String"/>
      </att>
    </graphics>
  </node>
  <node id="45876" label="ENSMUSG00000032733" cy:nodeId="543">
    <graphics z="0.0" y="-78.77062160156402" x="241.1349531666433">
      <att name="lockedVisualProperties" type="list" cy:type="List">
        <att name="NODE_LABEL" value="" type="string" cy:type="String"/>
      </att>
    </graphics>
  </node>
  <node id="45875" label="ENSMUSG00000032740" cy:nodeId="544">
    <graphics z="0.0" y="125.71045749999848" x="10.883045818010487">
      <att name="lockedVisualProperties" type="list" cy:type="List">
        <att name="NODE_LABEL" value="" type="string" cy:type="String"/>
      </att>
    </graphics>
  </node>
  <node id="45874" label="ENSMUSG00000032754" cy:nodeId="545">
    <graphics z="0.0" y="213.5059439501938" x="92.7432066456472">
      <att name="lockedVisualProperties" type="list" cy:type="List">
        <att name="NODE_LABEL" value="" type="string" cy:type="String"/>
      </att>
    </graphics>
  </node>
  <node id="45873" label="ENSMUSG00000032783" cy:nodeId="546">
    <graphics z="0.0" y="-5.929370228273001" x="141.5009657398855">
      <att name="lockedVisualProperties" type="list" cy:type="List">
        <att name="NODE_LABEL" value="" type="string" cy:type="String"/>
      </att>
    </graphics>
  </node>
  <node id="45872" label="ENSMUSG00000032849" cy:nodeId="547">
    <graphics z="0.0" y="-75.85240871093902" x="-18.193522785505138">
      <att name="lockedVisualProperties" type="list" cy:type="List">
        <att name="NODE_LABEL" value="" type="string" cy:type="String"/>
      </att>
    </graphics>
  </node>
  <node id="45871" label="ENSMUSG00000032852" cy:nodeId="548">
    <graphics z="0.0" y="394.43727939941255" x="-210.40804610093483">
      <att name="lockedVisualProperties" type="list" cy:type="List">
        <att name="NODE_LABEL" value="" type="string" cy:type="String"/>
      </att>
    </graphics>
  </node>
  <node id="45870" label="ENSMUSG00000032854" cy:nodeId="549">
    <graphics z="0.0" y="-85.11707240722808" x="-88.4714921458567">
      <att name="lockedVisualProperties" type="list" cy:type="List">
        <att name="NODE_LABEL" value="" type="string" cy:type="String"/>
      </att>
    </graphics>
  </node>
  <node id="45869" label="ENSMUSG00000032883" cy:nodeId="550">
    <graphics z="0.0" y="280.77358311035005" x="79.13045182386986">
      <att name="lockedVisualProperties" type="list" cy:type="List">
        <att name="NODE_LABEL" value="" type="string" cy:type="String"/>
      </att>
    </graphics>
  </node>
  <node id="45868" label="ENSMUSG00000032965" cy:nodeId="551">
    <graphics z="0.0" y="168.6543814501938" x="-91.5054276927317">
      <att name="lockedVisualProperties" type="list" cy:type="List">
        <att name="NODE_LABEL" value="" type="string" cy:type="String"/>
      </att>
    </graphics>
  </node>
  <node id="45867" label="ENSMUSG00000032978" cy:nodeId="552">
    <graphics z="0.0" y="-175.64401942871245" x="48.91106095472924">
      <att name="lockedVisualProperties" type="list" cy:type="List">
        <att name="NODE_LABEL" value="" type="string" cy:type="String"/>
      </att>
    </graphics>
  </node>
  <node id="45866" label="ENSMUSG00000033033" cy:nodeId="553">
    <graphics z="0.0" y="106.32358616210786" x="451.28748002211205">
      <att name="lockedVisualProperties" type="list" cy:type="List">
        <att name="NODE_LABEL" value="" type="string" cy:type="String"/>
      </att>
    </graphics>
  </node>
  <node id="45865" label="ENSMUSG00000033105" cy:nodeId="554">
    <graphics z="0.0" y="-203.6935189404312" x="-106.66897139390358">
      <att name="lockedVisualProperties" type="list" cy:type="List">
        <att name="NODE_LABEL" value="" type="string" cy:type="String"/>
      </att>
    </graphics>
  </node>
  <node id="45864" label="ENSMUSG00000033152" cy:nodeId="555">
    <graphics z="0.0" y="22.555599864500437" x="-335.5968278392161">
      <att name="lockedVisualProperties" type="list" cy:type="List">
        <att name="NODE_LABEL" value="" type="string" cy:type="String"/>
      </att>
    </graphics>
  </node>
  <node id="45863" label="ENSMUSG00000033161" cy:nodeId="556">
    <graphics z="0.0" y="-30.238354984742728" x="73.9463316456472">
      <att name="lockedVisualProperties" type="list" cy:type="List">
        <att name="NODE_LABEL" value="" type="string" cy:type="String"/>
      </att>
    </graphics>
  </node>
  <node id="45862" label="ENSMUSG00000033209" cy:nodeId="557">
    <graphics z="0.0" y="-18.777665440064993" x="-116.2329667552317">
      <att name="lockedVisualProperties" type="list" cy:type="List">
        <att name="NODE_LABEL" value="" type="string" cy:type="String"/>
      </att>
    </graphics>
  </node>
  <node id="45861" label="ENSMUSG00000033256" cy:nodeId="558">
    <graphics z="0.0" y="114.1392447314438" x="90.2701841847097">
      <att name="lockedVisualProperties" type="list" cy:type="List">
        <att name="NODE_LABEL" value="" type="string" cy:type="String"/>
      </att>
    </graphics>
  </node>
  <node id="45860" label="ENSMUSG00000033287" cy:nodeId="559">
    <graphics z="0.0" y="-58.832923237306204" x="6.012135173479237">
      <att name="lockedVisualProperties" type="list" cy:type="List">
        <att name="NODE_LABEL" value="" type="string" cy:type="String"/>
      </att>
    </graphics>
  </node>
  <node id="45859" label="ENSMUSG00000033318" cy:nodeId="560">
    <graphics z="0.0" y="211.38146274902192" x="-99.35683760484108">
      <att name="lockedVisualProperties" type="list" cy:type="List">
        <att name="NODE_LABEL" value="" type="string" cy:type="String"/>
      </att>
    </graphics>
  </node>
  <node id="45858" label="ENSMUSG00000033379" cy:nodeId="561">
    <graphics z="0.0" y="184.02478855468598" x="-135.48037276109108">
      <att name="lockedVisualProperties" type="list" cy:type="List">
        <att name="NODE_LABEL" value="" type="string" cy:type="String"/>
      </att>
    </graphics>
  </node>
  <node id="45857" label="ENSMUSG00000033491" cy:nodeId="562">
    <graphics z="0.0" y="138.6003043017563" x="-119.62044844468483">
      <att name="lockedVisualProperties" type="list" cy:type="List">
        <att name="NODE_LABEL" value="" type="string" cy:type="String"/>
      </att>
    </graphics>
  </node>
  <node id="45856" label="ENSMUSG00000033530" cy:nodeId="563">
    <graphics z="0.0" y="190.51172703124848" x="44.30603470961205">
      <att name="lockedVisualProperties" type="list" cy:type="List">
        <att name="NODE_LABEL" value="" type="string" cy:type="String"/>
      </att>
    </graphics>
  </node>
  <node id="45855" label="ENSMUSG00000033685" cy:nodeId="564">
    <graphics z="0.0" y="227.6316763720688" x="247.02876725355736">
      <att name="lockedVisualProperties" type="list" cy:type="List">
        <att name="NODE_LABEL" value="" type="string" cy:type="String"/>
      </att>
    </graphics>
  </node>
  <node id="45854" label="ENSMUSG00000033705" cy:nodeId="565">
    <graphics z="0.0" y="-23.086221043092337" x="264.7352720753347">
      <att name="lockedVisualProperties" type="list" cy:type="List">
        <att name="NODE_LABEL" value="" type="string" cy:type="String"/>
      </att>
    </graphics>
  </node>
  <node id="45853" label="ENSMUSG00000033717" cy:nodeId="566">
    <graphics z="0.0" y="-45.895651165467825" x="285.57644333998314">
      <att name="lockedVisualProperties" type="list" cy:type="List">
        <att name="NODE_LABEL" value="" type="string" cy:type="String"/>
      </att>
    </graphics>
  </node>
  <node id="45852" label="ENSMUSG00000033740" cy:nodeId="567">
    <graphics z="0.0" y="-107.03071529052886" x="302.26257767836205">
      <att name="lockedVisualProperties" type="list" cy:type="List">
        <att name="NODE_LABEL" value="" type="string" cy:type="String"/>
      </att>
    </graphics>
  </node>
  <node id="45851" label="ENSMUSG00000033871" cy:nodeId="568">
    <graphics z="0.0" y="-91.88996822021636" x="118.27045884291283">
      <att name="lockedVisualProperties" type="list" cy:type="List">
        <att name="NODE_LABEL" value="" type="string" cy:type="String"/>
      </att>
    </graphics>
  </node>
  <node id="45850" label="ENSMUSG00000033900" cy:nodeId="569">
    <graphics z="0.0" y="9.978272136228952" x="257.05137314955346">
      <att name="lockedVisualProperties" type="list" cy:type="List">
        <att name="NODE_LABEL" value="" type="string" cy:type="String"/>
      </att>
    </graphics>
  </node>
  <node id="45849" label="ENSMUSG00000033952" cy:nodeId="570">
    <graphics z="0.0" y="-1.0534356274429229" x="-111.11230025132545">
      <att name="lockedVisualProperties" type="list" cy:type="List">
        <att name="NODE_LABEL" value="" type="string" cy:type="String"/>
      </att>
    </graphics>
  </node>
  <node id="45848" label="ENSMUSG00000034006" cy:nodeId="571">
    <graphics z="0.0" y="86.81630009033051" x="-243.05892500718483">
      <att name="lockedVisualProperties" type="list" cy:type="List">
        <att name="NODE_LABEL" value="" type="string" cy:type="String"/>
      </att>
    </graphics>
  </node>
  <node id="45847" label="ENSMUSG00000034116" cy:nodeId="572">
    <graphics z="0.0" y="100.20177524902192" x="-292.1748307689036">
      <att name="lockedVisualProperties" type="list" cy:type="List">
        <att name="NODE_LABEL" value="" type="string" cy:type="String"/>
      </att>
    </graphics>
  </node>
  <node id="45846" label="ENSMUSG00000034227" cy:nodeId="573">
    <graphics z="0.0" y="-124.22275478027495" x="-213.13979658921608">
      <att name="lockedVisualProperties" type="list" cy:type="List">
        <att name="NODE_LABEL" value="" type="string" cy:type="String"/>
      </att>
    </graphics>
  </node>
  <node id="45845" label="ENSMUSG00000034265" cy:nodeId="574">
    <graphics z="0.0" y="181.8464743457016" x="-246.2689774974192">
      <att name="lockedVisualProperties" type="list" cy:type="List">
        <att name="NODE_LABEL" value="" type="string" cy:type="String"/>
      </att>
    </graphics>
  </node>
  <node id="45844" label="ENSMUSG00000034285" cy:nodeId="575">
    <graphics z="0.0" y="91.79851597167817" x="252.81181779066674">
      <att name="lockedVisualProperties" type="list" cy:type="List">
        <att name="NODE_LABEL" value="" type="string" cy:type="String"/>
      </att>
    </graphics>
  </node>
  <node id="45843" label="ENSMUSG00000034413" cy:nodeId="576">
    <graphics z="0.0" y="-85.01862270019683" x="92.54133286635033">
      <att name="lockedVisualProperties" type="list" cy:type="List">
        <att name="NODE_LABEL" value="" type="string" cy:type="String"/>
      </att>
    </graphics>
  </node>
  <node id="45842" label="ENSMUSG00000034472" cy:nodeId="577">
    <graphics z="0.0" y="229.56700962402192" x="-309.89440474351295">
      <att name="lockedVisualProperties" type="list" cy:type="List">
        <att name="NODE_LABEL" value="" type="string" cy:type="String"/>
      </att>
    </graphics>
  </node>
  <node id="45841" label="ENSMUSG00000034538" cy:nodeId="578">
    <graphics z="0.0" y="545.4844595751938" x="-138.5648759349192">
      <att name="lockedVisualProperties" type="list" cy:type="List">
        <att name="NODE_LABEL" value="" type="string" cy:type="String"/>
      </att>
    </graphics>
  </node>
  <node id="45840" label="ENSMUSG00000034573" cy:nodeId="579">
    <graphics z="0.0" y="315.16289585449067" x="-168.36217818101295">
      <att name="lockedVisualProperties" type="list" cy:type="List">
        <att name="NODE_LABEL" value="" type="string" cy:type="String"/>
      </att>
    </graphics>
  </node>
  <node id="45839" label="ENSMUSG00000034634" cy:nodeId="580">
    <graphics z="0.0" y="159.13347690917817" x="387.3892561451589">
      <att name="lockedVisualProperties" type="list" cy:type="List">
        <att name="NODE_LABEL" value="" type="string" cy:type="String"/>
      </att>
    </graphics>
  </node>
  <node id="45838" label="ENSMUSG00000034684" cy:nodeId="581">
    <graphics z="0.0" y="298.97243564941255" x="-283.2143205149973">
      <att name="lockedVisualProperties" type="list" cy:type="List">
        <att name="NODE_LABEL" value="" type="string" cy:type="String"/>
      </att>
    </graphics>
  </node>
  <node id="45837" label="ENSMUSG00000034773" cy:nodeId="582">
    <graphics z="0.0" y="-78.5597298779312" x="158.5569674030935">
      <att name="lockedVisualProperties" type="list" cy:type="List">
        <att name="NODE_LABEL" value="" type="string" cy:type="String"/>
      </att>
    </graphics>
  </node>
  <node id="45836" label="ENSMUSG00000034781" cy:nodeId="583">
    <graphics z="0.0" y="-63.82380801818999" x="-102.34554610093483">
      <att name="lockedVisualProperties" type="list" cy:type="List">
        <att name="NODE_LABEL" value="" type="string" cy:type="String"/>
      </att>
    </graphics>
  </node>
  <node id="45835" label="ENSMUSG00000034981" cy:nodeId="584">
    <graphics z="0.0" y="217.09168308593598" x="41.6824385182058">
      <att name="lockedVisualProperties" type="list" cy:type="List">
        <att name="NODE_LABEL" value="" type="string" cy:type="String"/>
      </att>
    </graphics>
  </node>
  <node id="45834" label="ENSMUSG00000035095" cy:nodeId="585">
    <graphics z="0.0" y="256.6668631396469" x="218.58212723890892">
      <att name="lockedVisualProperties" type="list" cy:type="List">
        <att name="NODE_LABEL" value="" type="string" cy:type="String"/>
      </att>
    </graphics>
  </node>
  <node id="45833" label="ENSMUSG00000035105" cy:nodeId="586">
    <graphics z="0.0" y="-25.557975117189017" x="278.08235612074486">
      <att name="lockedVisualProperties" type="list" cy:type="List">
        <att name="NODE_LABEL" value="" type="string" cy:type="String"/>
      </att>
    </graphics>
  </node>
  <node id="45832" label="ENSMUSG00000035107" cy:nodeId="587">
    <graphics z="0.0" y="-131.13683253906402" x="-270.9046281321848">
      <att name="lockedVisualProperties" type="list" cy:type="List">
        <att name="NODE_LABEL" value="" type="string" cy:type="String"/>
      </att>
    </graphics>
  </node>
  <node id="45831" label="ENSMUSG00000035164" cy:nodeId="588">
    <graphics z="0.0" y="120.12751072265473" x="13.219822551408924">
      <att name="lockedVisualProperties" type="list" cy:type="List">
        <att name="NODE_LABEL" value="" type="string" cy:type="String"/>
      </att>
    </graphics>
  </node>
  <node id="45830" label="ENSMUSG00000035181" cy:nodeId="589">
    <graphics z="0.0" y="-20.84050017975005" x="-206.5349687083567">
      <att name="lockedVisualProperties" type="list" cy:type="List">
        <att name="NODE_LABEL" value="" type="string" cy:type="String"/>
      </att>
    </graphics>
  </node>
  <node id="45829" label="ENSMUSG00000035235" cy:nodeId="590">
    <graphics z="0.0" y="237.33922642089692" x="348.91997208754174">
      <att name="lockedVisualProperties" type="list" cy:type="List">
        <att name="NODE_LABEL" value="" type="string" cy:type="String"/>
      </att>
    </graphics>
  </node>
  <node id="45828" label="ENSMUSG00000035279" cy:nodeId="591">
    <graphics z="0.0" y="102.30893772460786" x="44.211277629533924">
      <att name="lockedVisualProperties" type="list" cy:type="List">
        <att name="NODE_LABEL" value="" type="string" cy:type="String"/>
      </att>
    </graphics>
  </node>
  <node id="45827" label="ENSMUSG00000035357" cy:nodeId="592">
    <graphics z="0.0" y="88.26255863525239" x="175.36781563917748">
      <att name="lockedVisualProperties" type="list" cy:type="List">
        <att name="NODE_LABEL" value="" type="string" cy:type="String"/>
      </att>
    </graphics>
  </node>
  <node id="45826" label="ENSMUSG00000035431" cy:nodeId="593">
    <graphics z="0.0" y="80.11716526367036" x="-130.0206864817942">
      <att name="lockedVisualProperties" type="list" cy:type="List">
        <att name="NODE_LABEL" value="" type="string" cy:type="String"/>
      </att>
    </graphics>
  </node>
  <node id="45825" label="ENSMUSG00000035441" cy:nodeId="594">
    <graphics z="0.0" y="189.13098972656098" x="195.3473555103933">
      <att name="lockedVisualProperties" type="list" cy:type="List">
        <att name="NODE_LABEL" value="" type="string" cy:type="String"/>
      </att>
    </graphics>
  </node>
  <node id="45824" label="ENSMUSG00000035504" cy:nodeId="595">
    <graphics z="0.0" y="-162.7844613232437" x="201.158070232073">
      <att name="lockedVisualProperties" type="list" cy:type="List">
        <att name="NODE_LABEL" value="" type="string" cy:type="String"/>
      </att>
    </graphics>
  </node>
  <node id="45823" label="ENSMUSG00000035506" cy:nodeId="596">
    <graphics z="0.0" y="-221.54457790039214" x="100.82402482191674">
      <att name="lockedVisualProperties" type="list" cy:type="List">
        <att name="NODE_LABEL" value="" type="string" cy:type="String"/>
      </att>
    </graphics>
  </node>
  <node id="45822" label="ENSMUSG00000035642" cy:nodeId="597">
    <graphics z="0.0" y="-34.2094691433731" x="96.61964097181908">
      <att name="lockedVisualProperties" type="list" cy:type="List">
        <att name="NODE_LABEL" value="" type="string" cy:type="String"/>
      </att>
    </graphics>
  </node>
  <node id="45821" label="ENSMUSG00000035683" cy:nodeId="598">
    <graphics z="0.0" y="-262.15351039550933" x="-241.04516157945045">
      <att name="lockedVisualProperties" type="list" cy:type="List">
        <att name="NODE_LABEL" value="" type="string" cy:type="String"/>
      </att>
    </graphics>
  </node>
  <node id="45820" label="ENSMUSG00000035722" cy:nodeId="599">
    <graphics z="0.0" y="538.8882071337875" x="35.87756791273705">
      <att name="lockedVisualProperties" type="list" cy:type="List">
        <att name="NODE_LABEL" value="" type="string" cy:type="String"/>
      </att>
    </graphics>
  </node>
  <node id="45819" label="ENSMUSG00000035849" cy:nodeId="600">
    <graphics z="0.0" y="82.16702335693208" x="313.19145646254174">
      <att name="lockedVisualProperties" type="list" cy:type="List">
        <att name="NODE_LABEL" value="" type="string" cy:type="String"/>
      </att>
    </graphics>
  </node>
  <node id="45818" label="ENSMUSG00000035900" cy:nodeId="601">
    <graphics z="0.0" y="23.836250957029733" x="190.6750380055105">
      <att name="lockedVisualProperties" type="list" cy:type="List">
        <att name="NODE_LABEL" value="" type="string" cy:type="String"/>
      </att>
    </graphics>
  </node>
  <node id="45817" label="ENSMUSG00000035901" cy:nodeId="602">
    <graphics z="0.0" y="43.754906352537546" x="218.31620087782494">
      <att name="lockedVisualProperties" type="list" cy:type="List">
        <att name="NODE_LABEL" value="" type="string" cy:type="String"/>
      </att>
    </graphics>
  </node>
  <node id="45816" label="ENSMUSG00000036036" cy:nodeId="603">
    <graphics z="0.0" y="55.27869480468598" x="26.44018998304955">
      <att name="lockedVisualProperties" type="list" cy:type="List">
        <att name="NODE_LABEL" value="" type="string" cy:type="String"/>
      </att>
    </graphics>
  </node>
  <node id="45815" label="ENSMUSG00000036067" cy:nodeId="604">
    <graphics z="0.0" y="327.2015005908188" x="319.32922806898705">
      <att name="lockedVisualProperties" type="list" cy:type="List">
        <att name="NODE_LABEL" value="" type="string" cy:type="String"/>
      </att>
    </graphics>
  </node>
  <node id="45814" label="ENSMUSG00000036599" cy:nodeId="605">
    <graphics z="0.0" y="-38.14355785034331" x="-92.24279341538795">
      <att name="lockedVisualProperties" type="list" cy:type="List">
        <att name="NODE_LABEL" value="" type="string" cy:type="String"/>
      </att>
    </graphics>
  </node>
  <node id="45813" label="ENSMUSG00000036667" cy:nodeId="606">
    <graphics z="0.0" y="-211.67468959472808" x="-75.24680647691139">
      <att name="lockedVisualProperties" type="list" cy:type="List">
        <att name="NODE_LABEL" value="" type="string" cy:type="String"/>
      </att>
    </graphics>
  </node>
  <node id="45812" label="ENSMUSG00000036745" cy:nodeId="607">
    <graphics z="0.0" y="84.56657474853364" x="-30.83568892320045">
      <att name="lockedVisualProperties" type="list" cy:type="List">
        <att name="NODE_LABEL" value="" type="string" cy:type="String"/>
      </att>
    </graphics>
  </node>
  <node id="45811" label="ENSMUSG00000036832" cy:nodeId="608">
    <graphics z="0.0" y="-308.8518136181656" x="160.31987061659447">
      <att name="lockedVisualProperties" type="list" cy:type="List">
        <att name="NODE_LABEL" value="" type="string" cy:type="String"/>
      </att>
    </graphics>
  </node>
  <node id="45810" label="ENSMUSG00000036863" cy:nodeId="609">
    <graphics z="0.0" y="-2.8526566662612822" x="-21.164332722028576">
      <att name="lockedVisualProperties" type="list" cy:type="List">
        <att name="NODE_LABEL" value="" type="string" cy:type="String"/>
      </att>
    </graphics>
  </node>
  <node id="45809" label="ENSMUSG00000036875" cy:nodeId="610">
    <graphics z="0.0" y="-184.78636867187652" x="125.66848817030541">
      <att name="lockedVisualProperties" type="list" cy:type="List">
        <att name="NODE_LABEL" value="" type="string" cy:type="String"/>
      </att>
    </graphics>
  </node>
  <node id="45808" label="ENSMUSG00000036887" cy:nodeId="611">
    <graphics z="0.0" y="137.4235464892563" x="-19.367900226911388">
      <att name="lockedVisualProperties" type="list" cy:type="List">
        <att name="NODE_LABEL" value="" type="string" cy:type="String"/>
      </att>
    </graphics>
  </node>
  <node id="45807" label="ENSMUSG00000036912" cy:nodeId="612">
    <graphics z="0.0" y="364.5223318896469" x="-133.49123701890358">
      <att name="lockedVisualProperties" type="list" cy:type="List">
        <att name="NODE_LABEL" value="" type="string" cy:type="String"/>
      </att>
    </graphics>
  </node>
  <node id="45806" label="ENSMUSG00000036915" cy:nodeId="613">
    <graphics z="0.0" y="110.18882053710786" x="477.56042924086205">
      <att name="lockedVisualProperties" type="list" cy:type="List">
        <att name="NODE_LABEL" value="" type="string" cy:type="String"/>
      </att>
    </graphics>
  </node>
  <node id="45805" label="ENSMUSG00000036989" cy:nodeId="614">
    <graphics z="0.0" y="10.406948741453562" x="-223.77721724351295">
      <att name="lockedVisualProperties" type="list" cy:type="List">
        <att name="NODE_LABEL" value="" type="string" cy:type="String"/>
      </att>
    </graphics>
  </node>
  <node id="45804" label="ENSMUSG00000037005" cy:nodeId="615">
    <graphics z="0.0" y="336.57085483886567" x="-91.78197798570045">
      <att name="lockedVisualProperties" type="list" cy:type="List">
        <att name="NODE_LABEL" value="" type="string" cy:type="String"/>
      </att>
    </graphics>
  </node>
  <node id="45803" label="ENSMUSG00000037071" cy:nodeId="616">
    <graphics z="0.0" y="-14.612937275392142" x="158.6715685383474">
      <att name="lockedVisualProperties" type="list" cy:type="List">
        <att name="NODE_LABEL" value="" type="string" cy:type="String"/>
      </att>
    </graphics>
  </node>
  <node id="45802" label="ENSMUSG00000037169" cy:nodeId="617">
    <graphics z="0.0" y="74.98342197753755" x="-14.3054765208567">
      <att name="lockedVisualProperties" type="list" cy:type="List">
        <att name="NODE_LABEL" value="" type="string" cy:type="String"/>
      </att>
    </graphics>
  </node>
  <node id="45801" label="ENSMUSG00000037217" cy:nodeId="618">
    <graphics z="0.0" y="83.94718235351411" x="478.1156355396902">
      <att name="lockedVisualProperties" type="list" cy:type="List">
        <att name="NODE_LABEL" value="" type="string" cy:type="String"/>
      </att>
    </graphics>
  </node>
  <node id="45800" label="ENSMUSG00000037235" cy:nodeId="619">
    <graphics z="0.0" y="-15.153430286866751" x="-140.0797685130442">
      <att name="lockedVisualProperties" type="list" cy:type="List">
        <att name="NODE_LABEL" value="" type="string" cy:type="String"/>
      </att>
    </graphics>
  </node>
  <node id="45799" label="ENSMUSG00000037379" cy:nodeId="620">
    <graphics z="0.0" y="154.2819449267563" x="259.74555649916283">
      <att name="lockedVisualProperties" type="list" cy:type="List">
        <att name="NODE_LABEL" value="" type="string" cy:type="String"/>
      </att>
    </graphics>
  </node>
  <node id="45798" label="ENSMUSG00000037386" cy:nodeId="621">
    <graphics z="0.0" y="-240.44943935058745" x="238.9974905506765">
      <att name="lockedVisualProperties" type="list" cy:type="List">
        <att name="NODE_LABEL" value="" type="string" cy:type="String"/>
      </att>
    </graphics>
  </node>
  <node id="45797" label="ENSMUSG00000037405" cy:nodeId="622">
    <graphics z="0.0" y="328.9919363818344" x="-26.170741413434826">
      <att name="lockedVisualProperties" type="list" cy:type="List">
        <att name="NODE_LABEL" value="" type="string" cy:type="String"/>
      </att>
    </graphics>
  </node>
  <node id="45796" label="ENSMUSG00000037428" cy:nodeId="623">
    <graphics z="0.0" y="-72.83118373535308" x="64.91611161390892">
      <att name="lockedVisualProperties" type="list" cy:type="List">
        <att name="NODE_LABEL" value="" type="string" cy:type="String"/>
      </att>
    </graphics>
  </node>
  <node id="45795" label="ENSMUSG00000037440" cy:nodeId="624">
    <graphics z="0.0" y="412.07692783691255" x="182.57264962355248">
      <att name="lockedVisualProperties" type="list" cy:type="List">
        <att name="NODE_LABEL" value="" type="string" cy:type="String"/>
      </att>
    </graphics>
  </node>
  <node id="45794" label="ENSMUSG00000037447" cy:nodeId="625">
    <graphics z="0.0" y="-78.63436442993316" x="4.963734294572987">
      <att name="lockedVisualProperties" type="list" cy:type="List">
        <att name="NODE_LABEL" value="" type="string" cy:type="String"/>
      </att>
    </graphics>
  </node>
  <node id="45793" label="ENSMUSG00000037509" cy:nodeId="626">
    <graphics z="0.0" y="283.22280186035005" x="-62.7013505442942">
      <att name="lockedVisualProperties" type="list" cy:type="List">
        <att name="NODE_LABEL" value="" type="string" cy:type="String"/>
      </att>
    </graphics>
  </node>
  <node id="45792" label="ENSMUSG00000037579" cy:nodeId="627">
    <graphics z="0.0" y="-89.60610515258941" x="-20.011271808942638">
      <att name="lockedVisualProperties" type="list" cy:type="List">
        <att name="NODE_LABEL" value="" type="string" cy:type="String"/>
      </att>
    </graphics>
  </node>
  <node id="45791" label="ENSMUSG00000037594" cy:nodeId="628">
    <graphics z="0.0" y="-72.53353816650542" x="203.81385865370385">
      <att name="lockedVisualProperties" type="list" cy:type="List">
        <att name="NODE_LABEL" value="" type="string" cy:type="String"/>
      </att>
    </graphics>
  </node>
  <node id="45790" label="ENSMUSG00000037606" cy:nodeId="629">
    <graphics z="0.0" y="-4.7607758679214385" x="72.5359541432058">
      <att name="lockedVisualProperties" type="list" cy:type="List">
        <att name="NODE_LABEL" value="" type="string" cy:type="String"/>
      </att>
    </graphics>
  </node>
  <node id="45789" label="ENSMUSG00000037621" cy:nodeId="630">
    <graphics z="0.0" y="-6.21192866943511" x="210.8694159046804">
      <att name="lockedVisualProperties" type="list" cy:type="List">
        <att name="NODE_LABEL" value="" type="string" cy:type="String"/>
      </att>
    </graphics>
  </node>
  <node id="45788" label="ENSMUSG00000037624" cy:nodeId="631">
    <graphics z="0.0" y="-259.6503976025406" x="-141.08352217515358">
      <att name="lockedVisualProperties" type="list" cy:type="List">
        <att name="NODE_LABEL" value="" type="string" cy:type="String"/>
      </att>
    </graphics>
  </node>
  <node id="45787" label="ENSMUSG00000037628" cy:nodeId="632">
    <graphics z="0.0" y="-44.222083393556204" x="-62.419459675153576">
      <att name="lockedVisualProperties" type="list" cy:type="List">
        <att name="NODE_LABEL" value="" type="string" cy:type="String"/>
      </att>
    </graphics>
  </node>
  <node id="45786" label="ENSMUSG00000037664" cy:nodeId="633">
    <graphics z="0.0" y="232.1304556689438" x="-146.50619063218483">
      <att name="lockedVisualProperties" type="list" cy:type="List">
        <att name="NODE_LABEL" value="" type="string" cy:type="String"/>
      </att>
    </graphics>
  </node>
  <node id="45785" label="ENSMUSG00000037679" cy:nodeId="634">
    <graphics z="0.0" y="31.72875278808442" x="-13.181239460309826">
      <att name="lockedVisualProperties" type="list" cy:type="List">
        <att name="NODE_LABEL" value="" type="string" cy:type="String"/>
      </att>
    </graphics>
  </node>
  <node id="45784" label="ENSMUSG00000037686" cy:nodeId="635">
    <graphics z="0.0" y="34.76883762695161" x="355.910023357073">
      <att name="lockedVisualProperties" type="list" cy:type="List">
        <att name="NODE_LABEL" value="" type="string" cy:type="String"/>
      </att>
    </graphics>
  </node>
  <node id="45783" label="ENSMUSG00000037712" cy:nodeId="636">
    <graphics z="0.0" y="-120.31501704834136" x="-57.759608600934826">
      <att name="lockedVisualProperties" type="list" cy:type="List">
        <att name="NODE_LABEL" value="" type="string" cy:type="String"/>
      </att>
    </graphics>
  </node>
  <node id="45782" label="ENSMUSG00000037784" cy:nodeId="637">
    <graphics z="0.0" y="518.183006938475" x="-182.66112837632545">
      <att name="lockedVisualProperties" type="list" cy:type="List">
        <att name="NODE_LABEL" value="" type="string" cy:type="String"/>
      </att>
    </graphics>
  </node>
  <node id="45781" label="ENSMUSG00000037820" cy:nodeId="638">
    <graphics z="0.0" y="105.81024998046723" x="-47.62775740464576">
      <att name="lockedVisualProperties" type="list" cy:type="List">
        <att name="NODE_LABEL" value="" type="string" cy:type="String"/>
      </att>
    </graphics>
  </node>
  <node id="45780" label="ENSMUSG00000037852" cy:nodeId="639">
    <graphics z="0.0" y="-169.01830226562652" x="-151.27639326890358">
      <att name="lockedVisualProperties" type="list" cy:type="List">
        <att name="NODE_LABEL" value="" type="string" cy:type="String"/>
      </att>
    </graphics>
  </node>
  <node id="45779" label="ENSMUSG00000037855" cy:nodeId="640">
    <graphics z="0.0" y="201.84893101074067" x="-92.54348311265358">
      <att name="lockedVisualProperties" type="list" cy:type="List">
        <att name="NODE_LABEL" value="" type="string" cy:type="String"/>
      </att>
    </graphics>
  </node>
  <node id="45778" label="ENSMUSG00000037946" cy:nodeId="641">
    <graphics z="0.0" y="-17.8481991925064" x="4.7437788502370495">
      <att name="lockedVisualProperties" type="list" cy:type="List">
        <att name="NODE_LABEL" value="" type="string" cy:type="String"/>
      </att>
    </graphics>
  </node>
  <node id="45777" label="ENSMUSG00000037972" cy:nodeId="642">
    <graphics z="0.0" y="-158.06146937988433" x="-251.02486738999733">
      <att name="lockedVisualProperties" type="list" cy:type="List">
        <att name="NODE_LABEL" value="" type="string" cy:type="String"/>
      </att>
    </graphics>
  </node>
  <node id="45776" label="ENSMUSG00000037991" cy:nodeId="643">
    <graphics z="0.0" y="-125.10433131836089" x="313.4187361256277">
      <att name="lockedVisualProperties" type="list" cy:type="List">
        <att name="NODE_LABEL" value="" type="string" cy:type="String"/>
      </att>
    </graphics>
  </node>
  <node id="45775" label="ENSMUSG00000038175" cy:nodeId="644">
    <graphics z="0.0" y="27.816624339598093" x="106.38377823988549">
      <att name="lockedVisualProperties" type="list" cy:type="List">
        <att name="NODE_LABEL" value="" type="string" cy:type="String"/>
      </att>
    </graphics>
  </node>
  <node id="45774" label="ENSMUSG00000038305" cy:nodeId="645">
    <graphics z="0.0" y="-7.082038227540579" x="367.84285416761986">
      <att name="lockedVisualProperties" type="list" cy:type="List">
        <att name="NODE_LABEL" value="" type="string" cy:type="String"/>
      </att>
    </graphics>
  </node>
  <node id="45773" label="ENSMUSG00000038312" cy:nodeId="646">
    <graphics z="0.0" y="-17.977427784425345" x="-251.0651200755442">
      <att name="lockedVisualProperties" type="list" cy:type="List">
        <att name="NODE_LABEL" value="" type="string" cy:type="String"/>
      </att>
    </graphics>
  </node>
  <node id="45772" label="ENSMUSG00000038319" cy:nodeId="647">
    <graphics z="0.0" y="216.5725943408188" x="69.32056870619408">
      <att name="lockedVisualProperties" type="list" cy:type="List">
        <att name="NODE_LABEL" value="" type="string" cy:type="String"/>
      </att>
    </graphics>
  </node>
  <node id="45771" label="ENSMUSG00000038349" cy:nodeId="648">
    <graphics z="0.0" y="75.98221653320161" x="281.4331709400808">
      <att name="lockedVisualProperties" type="list" cy:type="List">
        <att name="NODE_LABEL" value="" type="string" cy:type="String"/>
      </att>
    </graphics>
  </node>
  <node id="45770" label="ENSMUSG00000038354" cy:nodeId="649">
    <graphics z="0.0" y="-332.07672816894683" x="21.528706218401112">
      <att name="lockedVisualProperties" type="list" cy:type="List">
        <att name="NODE_LABEL" value="" type="string" cy:type="String"/>
      </att>
    </graphics>
  </node>
  <node id="45769" label="ENSMUSG00000038379" cy:nodeId="650">
    <graphics z="0.0" y="135.73891514160005" x="34.690952922502674">
      <att name="lockedVisualProperties" type="list" cy:type="List">
        <att name="NODE_LABEL" value="" type="string" cy:type="String"/>
      </att>
    </graphics>
  </node>
  <node id="45768" label="ENSMUSG00000038451" cy:nodeId="651">
    <graphics z="0.0" y="230.99315708495942" x="153.63190903822533">
      <att name="lockedVisualProperties" type="list" cy:type="List">
        <att name="NODE_LABEL" value="" type="string" cy:type="String"/>
      </att>
    </graphics>
  </node>
  <node id="45767" label="ENSMUSG00000038456" cy:nodeId="652">
    <graphics z="0.0" y="198.85910862304536" x="175.44886460463158">
      <att name="lockedVisualProperties" type="list" cy:type="List">
        <att name="NODE_LABEL" value="" type="string" cy:type="String"/>
      </att>
    </graphics>
  </node>
  <node id="45766" label="ENSMUSG00000038560" cy:nodeId="653">
    <graphics z="0.0" y="280.2574393115219" x="157.7421366230642">
      <att name="lockedVisualProperties" type="list" cy:type="List">
        <att name="NODE_LABEL" value="" type="string" cy:type="String"/>
      </att>
    </graphics>
  </node>
  <node id="45765" label="ENSMUSG00000038599" cy:nodeId="654">
    <graphics z="0.0" y="151.16474216796723" x="121.73714127699486">
      <att name="lockedVisualProperties" type="list" cy:type="List">
        <att name="NODE_LABEL" value="" type="string" cy:type="String"/>
      </att>
    </graphics>
  </node>
  <node id="45764" label="ENSMUSG00000038602" cy:nodeId="655">
    <graphics z="0.0" y="-314.4862130322281" x="13.301624919572987">
      <att name="lockedVisualProperties" type="list" cy:type="List">
        <att name="NODE_LABEL" value="" type="string" cy:type="String"/>
      </att>
    </graphics>
  </node>
  <node id="45763" label="ENSMUSG00000038644" cy:nodeId="656">
    <graphics z="0.0" y="-70.34494716308745" x="-245.6649735911692">
      <att name="lockedVisualProperties" type="list" cy:type="List">
        <att name="NODE_LABEL" value="" type="string" cy:type="String"/>
      </att>
    </graphics>
  </node>
  <node id="45762" label="ENSMUSG00000038777" cy:nodeId="657">
    <graphics z="0.0" y="-163.3430550732437" x="248.66330399672142">
      <att name="lockedVisualProperties" type="list" cy:type="List">
        <att name="NODE_LABEL" value="" type="string" cy:type="String"/>
      </att>
    </graphics>
  </node>
  <node id="45761" label="ENSMUSG00000038879" cy:nodeId="658">
    <graphics z="0.0" y="-236.96832973144683" x="-155.0874589427317">
      <att name="lockedVisualProperties" type="list" cy:type="List">
        <att name="NODE_LABEL" value="" type="string" cy:type="String"/>
      </att>
    </graphics>
  </node>
  <node id="45760" label="ENSMUSG00000038884" cy:nodeId="659">
    <graphics z="0.0" y="114.24456089355317" x="80.25941147963158">
      <att name="lockedVisualProperties" type="list" cy:type="List">
        <att name="NODE_LABEL" value="" type="string" cy:type="String"/>
      </att>
    </graphics>
  </node>
  <node id="45759" label="ENSMUSG00000038984" cy:nodeId="660">
    <graphics z="0.0" y="130.03652256347505" x="-240.28316817124733">
      <att name="lockedVisualProperties" type="list" cy:type="List">
        <att name="NODE_LABEL" value="" type="string" cy:type="String"/>
      </att>
    </graphics>
  </node>
  <node id="45758" label="ENSMUSG00000039004" cy:nodeId="661">
    <graphics z="0.0" y="352.34780186035005" x="-311.3927567942942">
      <att name="lockedVisualProperties" type="list" cy:type="List">
        <att name="NODE_LABEL" value="" type="string" cy:type="String"/>
      </att>
    </graphics>
  </node>
  <node id="45757" label="ENSMUSG00000039013" cy:nodeId="662">
    <graphics z="0.0" y="323.55620640136567" x="205.77907624403588">
      <att name="lockedVisualProperties" type="list" cy:type="List">
        <att name="NODE_LABEL" value="" type="string" cy:type="String"/>
      </att>
    </graphics>
  </node>
  <node id="45756" label="ENSMUSG00000039050" cy:nodeId="663">
    <graphics z="0.0" y="19.621475871580515" x="95.2667662159597">
      <att name="lockedVisualProperties" type="list" cy:type="List">
        <att name="NODE_LABEL" value="" type="string" cy:type="String"/>
      </att>
    </graphics>
  </node>
  <node id="45755" label="ENSMUSG00000039059" cy:nodeId="664">
    <graphics z="0.0" y="191.97875278808442" x="-195.8231767161692">
      <att name="lockedVisualProperties" type="list" cy:type="List">
        <att name="NODE_LABEL" value="" type="string" cy:type="String"/>
      </att>
    </graphics>
  </node>
  <node id="45754" label="ENSMUSG00000039087" cy:nodeId="665">
    <graphics z="0.0" y="-110.01866847656402" x="-39.884791706403576">
      <att name="lockedVisualProperties" type="list" cy:type="List">
        <att name="NODE_LABEL" value="" type="string" cy:type="String"/>
      </att>
    </graphics>
  </node>
  <node id="45753" label="ENSMUSG00000039126" cy:nodeId="666">
    <graphics z="0.0" y="-128.79124385498199" x="125.69760193983666">
      <att name="lockedVisualProperties" type="list" cy:type="List">
        <att name="NODE_LABEL" value="" type="string" cy:type="String"/>
      </att>
    </graphics>
  </node>
  <node id="45752" label="ENSMUSG00000039145" cy:nodeId="667">
    <graphics z="0.0" y="-79.21897822998199" x="211.8122984425222">
      <att name="lockedVisualProperties" type="list" cy:type="List">
        <att name="NODE_LABEL" value="" type="string" cy:type="String"/>
      </att>
    </graphics>
  </node>
  <node id="45751" label="ENSMUSG00000039168" cy:nodeId="668">
    <graphics z="0.0" y="285.47487705566255" x="0.960682536760487">
      <att name="lockedVisualProperties" type="list" cy:type="List">
        <att name="NODE_LABEL" value="" type="string" cy:type="String"/>
      </att>
    </graphics>
  </node>
  <node id="45750" label="ENSMUSG00000039270" cy:nodeId="669">
    <graphics z="0.0" y="-101.95036250732574" x="-77.81650862534889">
      <att name="lockedVisualProperties" type="list" cy:type="List">
        <att name="NODE_LABEL" value="" type="string" cy:type="String"/>
      </att>
    </graphics>
  </node>
  <node id="45749" label="ENSMUSG00000039304" cy:nodeId="670">
    <graphics z="0.0" y="-198.9232552685562" x="-156.09804854234108">
      <att name="lockedVisualProperties" type="list" cy:type="List">
        <att name="NODE_LABEL" value="" type="string" cy:type="String"/>
      </att>
    </graphics>
  </node>
  <node id="45748" label="ENSMUSG00000039396" cy:nodeId="671">
    <graphics z="0.0" y="-57.527842823487845" x="274.92366471449486">
      <att name="lockedVisualProperties" type="list" cy:type="List">
        <att name="NODE_LABEL" value="" type="string" cy:type="String"/>
      </att>
    </graphics>
  </node>
  <node id="45747" label="ENSMUSG00000039470" cy:nodeId="672">
    <graphics z="0.0" y="133.61907261230317" x="218.1613203541433">
      <att name="lockedVisualProperties" type="list" cy:type="List">
        <att name="NODE_LABEL" value="" type="string" cy:type="String"/>
      </att>
    </graphics>
  </node>
  <node id="45746" label="ENSMUSG00000039683" cy:nodeId="673">
    <graphics z="0.0" y="-70.44194728515777" x="-214.65145430405983">
      <att name="lockedVisualProperties" type="list" cy:type="List">
        <att name="NODE_LABEL" value="" type="string" cy:type="String"/>
      </att>
    </graphics>
  </node>
  <node id="45745" label="ENSMUSG00000039740" cy:nodeId="674">
    <graphics z="0.0" y="-219.12177211425933" x="-141.3215898021067">
      <att name="lockedVisualProperties" type="list" cy:type="List">
        <att name="NODE_LABEL" value="" type="string" cy:type="String"/>
      </att>
    </graphics>
  </node>
  <node id="45744" label="ENSMUSG00000039809" cy:nodeId="675">
    <graphics z="0.0" y="-152.60822993896636" x="163.0960890309011">
      <att name="lockedVisualProperties" type="list" cy:type="List">
        <att name="NODE_LABEL" value="" type="string" cy:type="String"/>
      </att>
    </graphics>
  </node>
  <node id="45743" label="ENSMUSG00000039813" cy:nodeId="676">
    <graphics z="0.0" y="98.83829563476411" x="245.61372056166283">
      <att name="lockedVisualProperties" type="list" cy:type="List">
        <att name="NODE_LABEL" value="" type="string" cy:type="String"/>
      </att>
    </graphics>
  </node>
  <node id="45742" label="ENSMUSG00000039814" cy:nodeId="677">
    <graphics z="0.0" y="136.28429478027192" x="142.4142729298269">
      <att name="lockedVisualProperties" type="list" cy:type="List">
        <att name="NODE_LABEL" value="" type="string" cy:type="String"/>
      </att>
    </graphics>
  </node>
  <node id="45741" label="ENSMUSG00000039911" cy:nodeId="678">
    <graphics z="0.0" y="351.64641636230317" x="96.78933396498314">
      <att name="lockedVisualProperties" type="list" cy:type="List">
        <att name="NODE_LABEL" value="" type="string" cy:type="String"/>
      </att>
    </graphics>
  </node>
  <node id="45740" label="ENSMUSG00000040084" cy:nodeId="679">
    <graphics z="0.0" y="160.69084995605317" x="186.8743568913137">
      <att name="lockedVisualProperties" type="list" cy:type="List">
        <att name="NODE_LABEL" value="" type="string" cy:type="String"/>
      </att>
    </graphics>
  </node>
  <node id="45739" label="ENSMUSG00000040170" cy:nodeId="680">
    <graphics z="0.0" y="-62.6206544079605" x="-34.23325667222389">
      <att name="lockedVisualProperties" type="list" cy:type="List">
        <att name="NODE_LABEL" value="" type="string" cy:type="String"/>
      </att>
    </graphics>
  </node>
  <node id="45738" label="ENSMUSG00000040209" cy:nodeId="681">
    <graphics z="0.0" y="-142.72690517089995" x="71.74248185316674">
      <att name="lockedVisualProperties" type="list" cy:type="List">
        <att name="NODE_LABEL" value="" type="string" cy:type="String"/>
      </att>
    </graphics>
  </node>
  <node id="45737" label="ENSMUSG00000040276" cy:nodeId="682">
    <graphics z="0.0" y="11.488014873045358" x="383.8149611012136">
      <att name="lockedVisualProperties" type="list" cy:type="List">
        <att name="NODE_LABEL" value="" type="string" cy:type="String"/>
      </att>
    </graphics>
  </node>
  <node id="45736" label="ENSMUSG00000040280" cy:nodeId="683">
    <graphics z="0.0" y="97.44200962402192" x="160.33424439589135">
      <att name="lockedVisualProperties" type="list" cy:type="List">
        <att name="NODE_LABEL" value="" type="string" cy:type="String"/>
      </att>
    </graphics>
  </node>
  <node id="45735" label="ENSMUSG00000040351" cy:nodeId="684">
    <graphics z="0.0" y="-259.052359882814" x="-6.5016129954660755">
      <att name="lockedVisualProperties" type="list" cy:type="List">
        <att name="NODE_LABEL" value="" type="string" cy:type="String"/>
      </att>
    </graphics>
  </node>
  <node id="45734" label="ENSMUSG00000040389" cy:nodeId="685">
    <graphics z="0.0" y="-128.54191524170074" x="-58.844020222028576">
      <att name="lockedVisualProperties" type="list" cy:type="List">
        <att name="NODE_LABEL" value="" type="string" cy:type="String"/>
      </att>
    </graphics>
  </node>
  <node id="45733" label="ENSMUSG00000040430" cy:nodeId="686">
    <graphics z="0.0" y="190.41429966308442" x="131.10546555678002">
      <att name="lockedVisualProperties" type="list" cy:type="List">
        <att name="NODE_LABEL" value="" type="string" cy:type="String"/>
      </att>
    </graphics>
  </node>
  <node id="45732" label="ENSMUSG00000040433" cy:nodeId="687">
    <graphics z="0.0" y="42.74350040771333" x="-201.12368330796608">
      <att name="lockedVisualProperties" type="list" cy:type="List">
        <att name="NODE_LABEL" value="" type="string" cy:type="String"/>
      </att>
    </graphics>
  </node>
  <node id="45731" label="ENSMUSG00000040447" cy:nodeId="688">
    <graphics z="0.0" y="-162.3253777661148" x="144.5666281239187">
      <att name="lockedVisualProperties" type="list" cy:type="List">
        <att name="NODE_LABEL" value="" type="string" cy:type="String"/>
      </att>
    </graphics>
  </node>
  <node id="45730" label="ENSMUSG00000040462" cy:nodeId="689">
    <graphics z="0.0" y="142.2550436816391" x="123.51271119276635">
      <att name="lockedVisualProperties" type="list" cy:type="List">
        <att name="NODE_LABEL" value="" type="string" cy:type="String"/>
      </att>
    </graphics>
  </node>
  <node id="45729" label="ENSMUSG00000040495" cy:nodeId="690">
    <graphics z="0.0" y="103.04123752929536" x="234.19615235487572">
      <att name="lockedVisualProperties" type="list" cy:type="List">
        <att name="NODE_LABEL" value="" type="string" cy:type="String"/>
      </att>
    </graphics>
  </node>
  <node id="45728" label="ENSMUSG00000040631" cy:nodeId="691">
    <graphics z="0.0" y="111.30617588378755" x="43.329258586565174">
      <att name="lockedVisualProperties" type="list" cy:type="List">
        <att name="NODE_LABEL" value="" type="string" cy:type="String"/>
      </att>
    </graphics>
  </node>
  <node id="45727" label="ENSMUSG00000040663" cy:nodeId="692">
    <graphics z="0.0" y="442.67726963378755" x="270.5485960499441">
      <att name="lockedVisualProperties" type="list" cy:type="List">
        <att name="NODE_LABEL" value="" type="string" cy:type="String"/>
      </att>
    </graphics>
  </node>
  <node id="45726" label="ENSMUSG00000040852" cy:nodeId="693">
    <graphics z="0.0" y="-45.61486751220855" x="125.10944810072533">
      <att name="lockedVisualProperties" type="list" cy:type="List">
        <att name="NODE_LABEL" value="" type="string" cy:type="String"/>
      </att>
    </graphics>
  </node>
  <node id="45725" label="ENSMUSG00000040918" cy:nodeId="694">
    <graphics z="0.0" y="-115.54383784912261" x="19.339375163713612">
      <att name="lockedVisualProperties" type="list" cy:type="List">
        <att name="NODE_LABEL" value="" type="string" cy:type="String"/>
      </att>
    </graphics>
  </node>
  <node id="45724" label="ENSMUSG00000040972" cy:nodeId="695">
    <graphics z="0.0" y="-96.7472527661148" x="260.4112669483816">
      <att name="lockedVisualProperties" type="list" cy:type="List">
        <att name="NODE_LABEL" value="" type="string" cy:type="String"/>
      </att>
    </graphics>
  </node>
  <node id="45723" label="ENSMUSG00000041025" cy:nodeId="696">
    <graphics z="0.0" y="-97.2203972973648" x="-0.8458817942942005">
      <att name="lockedVisualProperties" type="list" cy:type="List">
        <att name="NODE_LABEL" value="" type="string" cy:type="String"/>
      </att>
    </graphics>
  </node>
  <node id="45722" label="ENSMUSG00000041040" cy:nodeId="697">
    <graphics z="0.0" y="-71.73521358154449" x="8.357777263322987">
      <att name="lockedVisualProperties" type="list" cy:type="List">
        <att name="NODE_LABEL" value="" type="string" cy:type="String"/>
      </att>
    </graphics>
  </node>
  <node id="45721" label="ENSMUSG00000041058" cy:nodeId="698">
    <graphics z="0.0" y="-100.14803249023589" x="85.4496504322683">
      <att name="lockedVisualProperties" type="list" cy:type="List">
        <att name="NODE_LABEL" value="" type="string" cy:type="String"/>
      </att>
    </graphics>
  </node>
  <node id="45720" label="ENSMUSG00000041064" cy:nodeId="699">
    <graphics z="0.0" y="-3.097247425538626" x="40.73857560316674">
      <att name="lockedVisualProperties" type="list" cy:type="List">
        <att name="NODE_LABEL" value="" type="string" cy:type="String"/>
      </att>
    </graphics>
  </node>
  <node id="45719" label="ENSMUSG00000041075" cy:nodeId="700">
    <graphics z="0.0" y="158.58364170410005" x="-118.20693526109108">
      <att name="lockedVisualProperties" type="list" cy:type="List">
        <att name="NODE_LABEL" value="" type="string" cy:type="String"/>
      </att>
    </graphics>
  </node>
  <node id="45718" label="ENSMUSG00000041096" cy:nodeId="701">
    <graphics z="0.0" y="135.2732321582016" x="331.00081315199486">
      <att name="lockedVisualProperties" type="list" cy:type="List">
        <att name="NODE_LABEL" value="" type="string" cy:type="String"/>
      </att>
    </graphics>
  </node>
  <node id="45717" label="ENSMUSG00000041120" cy:nodeId="702">
    <graphics z="0.0" y="212.08010166503755" x="174.5139299885427">
      <att name="lockedVisualProperties" type="list" cy:type="List">
        <att name="NODE_LABEL" value="" type="string" cy:type="String"/>
      </att>
    </graphics>
  </node>
  <node id="45716" label="ENSMUSG00000041126" cy:nodeId="703">
    <graphics z="0.0" y="95.22974460937348" x="144.69751420179955">
      <att name="lockedVisualProperties" type="list" cy:type="List">
        <att name="NODE_LABEL" value="" type="string" cy:type="String"/>
      </att>
    </graphics>
  </node>
  <node id="45715" label="ENSMUSG00000041143" cy:nodeId="704">
    <graphics z="0.0" y="348.71733921386567" x="25.225559856096424">
      <att name="lockedVisualProperties" type="list" cy:type="List">
        <att name="NODE_LABEL" value="" type="string" cy:type="String"/>
      </att>
    </graphics>
  </node>
  <node id="45714" label="ENSMUSG00000041193" cy:nodeId="705">
    <graphics z="0.0" y="-42.89304668090972" x="309.87642350355736">
      <att name="lockedVisualProperties" type="list" cy:type="List">
        <att name="NODE_LABEL" value="" type="string" cy:type="String"/>
      </att>
    </graphics>
  </node>
  <node id="45713" label="ENSMUSG00000041219" cy:nodeId="706">
    <graphics z="0.0" y="-177.12580043457183" x="128.96876206556908">
      <att name="lockedVisualProperties" type="list" cy:type="List">
        <att name="NODE_LABEL" value="" type="string" cy:type="String"/>
      </att>
    </graphics>
  </node>
  <node id="45712" label="ENSMUSG00000041268" cy:nodeId="707">
    <graphics z="0.0" y="-190.17714625976714" x="33.80180802504174">
      <att name="lockedVisualProperties" type="list" cy:type="List">
        <att name="NODE_LABEL" value="" type="string" cy:type="String"/>
      </att>
    </graphics>
  </node>
  <node id="45711" label="ENSMUSG00000041431" cy:nodeId="708">
    <graphics z="0.0" y="-217.0387337841812" x="-94.67782149155983">
      <att name="lockedVisualProperties" type="list" cy:type="List">
        <att name="NODE_LABEL" value="" type="string" cy:type="String"/>
      </att>
    </graphics>
  </node>
  <node id="45710" label="ENSMUSG00000041548" cy:nodeId="709">
    <graphics z="0.0" y="104.46881931640473" x="-337.2369035228098">
      <att name="lockedVisualProperties" type="list" cy:type="List">
        <att name="NODE_LABEL" value="" type="string" cy:type="String"/>
      </att>
    </graphics>
  </node>
  <node id="45709" label="ENSMUSG00000041570" cy:nodeId="710">
    <graphics z="0.0" y="-203.94139796875152" x="79.25465073744408">
      <att name="lockedVisualProperties" type="list" cy:type="List">
        <att name="NODE_LABEL" value="" type="string" cy:type="String"/>
      </att>
    </graphics>
  </node>
  <node id="45708" label="ENSMUSG00000041609" cy:nodeId="711">
    <graphics z="0.0" y="-66.93273097656402" x="107.82319321791283">
      <att name="lockedVisualProperties" type="list" cy:type="List">
        <att name="NODE_LABEL" value="" type="string" cy:type="String"/>
      </att>
    </graphics>
  </node>
  <node id="45707" label="ENSMUSG00000041632" cy:nodeId="712">
    <graphics z="0.0" y="475.8824087939438" x="39.196262981096424">
      <att name="lockedVisualProperties" type="list" cy:type="List">
        <att name="NODE_LABEL" value="" type="string" cy:type="String"/>
      </att>
    </graphics>
  </node>
  <node id="45706" label="ENSMUSG00000041733" cy:nodeId="713">
    <graphics z="0.0" y="-131.64948970459136" x="26.840504314104237">
      <att name="lockedVisualProperties" type="list" cy:type="List">
        <att name="NODE_LABEL" value="" type="string" cy:type="String"/>
      </att>
    </graphics>
  </node>
  <node id="45705" label="ENSMUSG00000041889" cy:nodeId="714">
    <graphics z="0.0" y="186.88172214843598" x="288.1276976124441">
      <att name="lockedVisualProperties" type="list" cy:type="List">
        <att name="NODE_LABEL" value="" type="string" cy:type="String"/>
      </att>
    </graphics>
  </node>
  <node id="45704" label="ENSMUSG00000041930" cy:nodeId="715">
    <graphics z="0.0" y="232.91921299316255" x="19.089512492815174">
      <att name="lockedVisualProperties" type="list" cy:type="List">
        <att name="NODE_LABEL" value="" type="string" cy:type="String"/>
      </att>
    </graphics>
  </node>
  <node id="45703" label="ENSMUSG00000042035" cy:nodeId="716">
    <graphics z="0.0" y="-130.28575069091949" x="0.7432905689870495">
      <att name="lockedVisualProperties" type="list" cy:type="List">
        <att name="NODE_LABEL" value="" type="string" cy:type="String"/>
      </att>
    </graphics>
  </node>
  <node id="45702" label="ENSMUSG00000042042" cy:nodeId="717">
    <graphics z="0.0" y="-202.0987923779312" x="-83.75881514390358">
      <att name="lockedVisualProperties" type="list" cy:type="List">
        <att name="NODE_LABEL" value="" type="string" cy:type="String"/>
      </att>
    </graphics>
  </node>
  <node id="45701" label="ENSMUSG00000042096" cy:nodeId="718">
    <graphics z="0.0" y="375.88674229003755" x="76.00503983656517">
      <att name="lockedVisualProperties" type="list" cy:type="List">
        <att name="NODE_LABEL" value="" type="string" cy:type="String"/>
      </att>
    </graphics>
  </node>
  <node id="45700" label="ENSMUSG00000042099" cy:nodeId="719">
    <graphics z="0.0" y="56.922745402830515" x="293.2623716847097">
      <att name="lockedVisualProperties" type="list" cy:type="List">
        <att name="NODE_LABEL" value="" type="string" cy:type="String"/>
      </att>
    </graphics>
  </node>
  <node id="45699" label="ENSMUSG00000042109" cy:nodeId="720">
    <graphics z="0.0" y="218.25449436523286" x="63.82310929457299">
      <att name="lockedVisualProperties" type="list" cy:type="List">
        <att name="NODE_LABEL" value="" type="string" cy:type="String"/>
      </att>
    </graphics>
  </node>
  <node id="45698" label="ENSMUSG00000042115" cy:nodeId="721">
    <graphics z="0.0" y="92.71626346923676" x="163.34260811964623">
      <att name="lockedVisualProperties" type="list" cy:type="List">
        <att name="NODE_LABEL" value="" type="string" cy:type="String"/>
      </att>
    </graphics>
  </node>
  <node id="45697" label="ENSMUSG00000042213" cy:nodeId="722">
    <graphics z="0.0" y="-231.29921657226714" x="-353.4710954173411">
      <att name="lockedVisualProperties" type="list" cy:type="List">
        <att name="NODE_LABEL" value="" type="string" cy:type="String"/>
      </att>
    </graphics>
  </node>
  <node id="45696" label="ENSMUSG00000042258" cy:nodeId="723">
    <graphics z="0.0" y="103.96729343749848" x="87.59014573256127">
      <att name="lockedVisualProperties" type="list" cy:type="List">
        <att name="NODE_LABEL" value="" type="string" cy:type="String"/>
      </att>
    </graphics>
  </node>
  <node id="45695" label="ENSMUSG00000042303" cy:nodeId="724">
    <graphics z="0.0" y="-233.94904262207183" x="388.3974348560964">
      <att name="lockedVisualProperties" type="list" cy:type="List">
        <att name="NODE_LABEL" value="" type="string" cy:type="String"/>
      </att>
    </graphics>
  </node>
  <node id="45694" label="ENSMUSG00000042306" cy:nodeId="725">
    <graphics z="0.0" y="-87.39526302002105" x="164.26501336256615">
      <att name="lockedVisualProperties" type="list" cy:type="List">
        <att name="NODE_LABEL" value="" type="string" cy:type="String"/>
      </att>
    </graphics>
  </node>
  <node id="45693" label="ENSMUSG00000042333" cy:nodeId="726">
    <graphics z="0.0" y="15.795349772947702" x="215.92084946791283">
      <att name="lockedVisualProperties" type="list" cy:type="List">
        <att name="NODE_LABEL" value="" type="string" cy:type="String"/>
      </att>
    </graphics>
  </node>
  <node id="45692" label="ENSMUSG00000042359" cy:nodeId="727">
    <graphics z="0.0" y="237.67421787597505" x="68.44556107679955">
      <att name="lockedVisualProperties" type="list" cy:type="List">
        <att name="NODE_LABEL" value="" type="string" cy:type="String"/>
      </att>
    </graphics>
  </node>
  <node id="45691" label="ENSMUSG00000042429" cy:nodeId="728">
    <graphics z="0.0" y="187.3298727832016" x="32.0359541432058">
      <att name="lockedVisualProperties" type="list" cy:type="List">
        <att name="NODE_LABEL" value="" type="string" cy:type="String"/>
      </att>
    </graphics>
  </node>
  <node id="45690" label="ENSMUSG00000042564" cy:nodeId="729">
    <graphics z="0.0" y="341.5700613818344" x="174.7828098789846">
      <att name="lockedVisualProperties" type="list" cy:type="List">
        <att name="NODE_LABEL" value="" type="string" cy:type="String"/>
      </att>
    </graphics>
  </node>
  <node id="45689" label="ENSMUSG00000042607" cy:nodeId="730">
    <graphics z="0.0" y="-70.30007869384917" x="88.89162888685814">
      <att name="lockedVisualProperties" type="list" cy:type="List">
        <att name="NODE_LABEL" value="" type="string" cy:type="String"/>
      </att>
    </graphics>
  </node>
  <node id="45688" label="ENSMUSG00000042675" cy:nodeId="731">
    <graphics z="0.0" y="-289.16620570800933" x="-285.2462724192942">
      <att name="lockedVisualProperties" type="list" cy:type="List">
        <att name="NODE_LABEL" value="" type="string" cy:type="String"/>
      </att>
    </graphics>
  </node>
  <node id="45687" label="ENSMUSG00000042734" cy:nodeId="732">
    <graphics z="0.0" y="188.75588291503755" x="69.66601243178002">
      <att name="lockedVisualProperties" type="list" cy:type="List">
        <att name="NODE_LABEL" value="" type="string" cy:type="String"/>
      </att>
    </graphics>
  </node>
  <node id="45686" label="ENSMUSG00000042763" cy:nodeId="733">
    <graphics z="0.0" y="238.2129752001938" x="246.7458387867605">
      <att name="lockedVisualProperties" type="list" cy:type="List">
        <att name="NODE_LABEL" value="" type="string" cy:type="String"/>
      </att>
    </graphics>
  </node>
  <node id="45685" label="ENSMUSG00000043068" cy:nodeId="734">
    <graphics z="0.0" y="-24.645776096803274" x="239.86507477919213">
      <att name="lockedVisualProperties" type="list" cy:type="List">
        <att name="NODE_LABEL" value="" type="string" cy:type="String"/>
      </att>
    </graphics>
  </node>
  <node id="45684" label="ENSMUSG00000043154" cy:nodeId="735">
    <graphics z="0.0" y="-107.12870723388824" x="54.424786235490956">
      <att name="lockedVisualProperties" type="list" cy:type="List">
        <att name="NODE_LABEL" value="" type="string" cy:type="String"/>
      </att>
    </graphics>
  </node>
  <node id="45683" label="ENSMUSG00000043419" cy:nodeId="736">
    <graphics z="0.0" y="156.09563511230317" x="334.2958723560964">
      <att name="lockedVisualProperties" type="list" cy:type="List">
        <att name="NODE_LABEL" value="" type="string" cy:type="String"/>
      </att>
    </graphics>
  </node>
  <node id="45682" label="ENSMUSG00000043518" cy:nodeId="737">
    <graphics z="0.0" y="-190.3309701123062" x="-116.7647050364817">
      <att name="lockedVisualProperties" type="list" cy:type="List">
        <att name="NODE_LABEL" value="" type="string" cy:type="String"/>
      </att>
    </graphics>
  </node>
  <node id="45681" label="ENSMUSG00000043542" cy:nodeId="738">
    <graphics z="0.0" y="41.69901340820161" x="-244.81722578843483">
      <att name="lockedVisualProperties" type="list" cy:type="List">
        <att name="NODE_LABEL" value="" type="string" cy:type="String"/>
      </att>
    </graphics>
  </node>
  <node id="45680" label="ENSMUSG00000044072" cy:nodeId="739">
    <graphics z="0.0" y="236.5739371142563" x="71.20771470228783">
      <att name="lockedVisualProperties" type="list" cy:type="List">
        <att name="NODE_LABEL" value="" type="string" cy:type="String"/>
      </att>
    </graphics>
  </node>
  <node id="45679" label="ENSMUSG00000044201" cy:nodeId="740">
    <graphics z="0.0" y="-163.02321559570464" x="-381.9115251048411">
      <att name="lockedVisualProperties" type="list" cy:type="List">
        <att name="NODE_LABEL" value="" type="string" cy:type="String"/>
      </att>
    </graphics>
  </node>
  <node id="45678" label="ENSMUSG00000044244" cy:nodeId="741">
    <graphics z="0.0" y="214.59825962402192" x="290.7736479298269">
      <att name="lockedVisualProperties" type="list" cy:type="List">
        <att name="NODE_LABEL" value="" type="string" cy:type="String"/>
      </att>
    </graphics>
  </node>
  <node id="45677" label="ENSMUSG00000044254" cy:nodeId="742">
    <graphics z="0.0" y="-250.60205775879058" x="279.4715239063894">
      <att name="lockedVisualProperties" type="list" cy:type="List">
        <att name="NODE_LABEL" value="" type="string" cy:type="String"/>
      </att>
    </graphics>
  </node>
  <node id="45676" label="ENSMUSG00000044312" cy:nodeId="743">
    <graphics z="0.0" y="-181.39101344726714" x="495.9269758717214">
      <att name="lockedVisualProperties" type="list" cy:type="List">
        <att name="NODE_LABEL" value="" type="string" cy:type="String"/>
      </att>
    </graphics>
  </node>
  <node id="45675" label="ENSMUSG00000044461" cy:nodeId="744">
    <graphics z="0.0" y="298.3400809130844" x="182.66925110975853">
      <att name="lockedVisualProperties" type="list" cy:type="List">
        <att name="NODE_LABEL" value="" type="string" cy:type="String"/>
      </att>
    </graphics>
  </node>
  <node id="45674" label="ENSMUSG00000044468" cy:nodeId="745">
    <graphics z="0.0" y="117.56243198730317" x="-299.58092818101295">
      <att name="lockedVisualProperties" type="list" cy:type="List">
        <att name="NODE_LABEL" value="" type="string" cy:type="String"/>
      </att>
    </graphics>
  </node>
  <node id="45673" label="ENSMUSG00000044548" cy:nodeId="746">
    <graphics z="0.0" y="127.22535007812348" x="198.1576525227224">
      <att name="lockedVisualProperties" type="list" cy:type="List">
        <att name="NODE_LABEL" value="" type="string" cy:type="String"/>
      </att>
    </graphics>
  </node>
  <node id="45672" label="ENSMUSG00000044646" cy:nodeId="747">
    <graphics z="0.0" y="-83.5189583935562" x="61.47606339613549">
      <att name="lockedVisualProperties" type="list" cy:type="List">
        <att name="NODE_LABEL" value="" type="string" cy:type="String"/>
      </att>
    </graphics>
  </node>
  <node id="45671" label="ENSMUSG00000044674" cy:nodeId="748">
    <graphics z="0.0" y="50.56035679199067" x="315.1222578541433">
      <att name="lockedVisualProperties" type="list" cy:type="List">
        <att name="NODE_LABEL" value="" type="string" cy:type="String"/>
      </att>
    </graphics>
  </node>
  <node id="45670" label="ENSMUSG00000044748" cy:nodeId="749">
    <graphics z="0.0" y="-157.69241267822417" x="43.26881852308861">
      <att name="lockedVisualProperties" type="list" cy:type="List">
        <att name="NODE_LABEL" value="" type="string" cy:type="String"/>
      </att>
    </graphics>
  </node>
  <node id="45669" label="ENSMUSG00000045027" cy:nodeId="750">
    <graphics z="0.0" y="150.45627659179536" x="158.20326295057885">
      <att name="lockedVisualProperties" type="list" cy:type="List">
        <att name="NODE_LABEL" value="" type="string" cy:type="String"/>
      </att>
    </graphics>
  </node>
  <node id="45668" label="ENSMUSG00000045094" cy:nodeId="751">
    <graphics z="0.0" y="204.04845493652192" x="156.19009843031517">
      <att name="lockedVisualProperties" type="list" cy:type="List">
        <att name="NODE_LABEL" value="" type="string" cy:type="String"/>
      </att>
    </graphics>
  </node>
  <node id="45667" label="ENSMUSG00000045215" cy:nodeId="752">
    <graphics z="0.0" y="50.279259379881296" x="133.3563429371511">
      <att name="lockedVisualProperties" type="list" cy:type="List">
        <att name="NODE_LABEL" value="" type="string" cy:type="String"/>
      </att>
    </graphics>
  </node>
  <node id="45666" label="ENSMUSG00000045294" cy:nodeId="753">
    <graphics z="0.0" y="-160.69997340820464" x="47.90001359144799">
      <att name="lockedVisualProperties" type="list" cy:type="List">
        <att name="NODE_LABEL" value="" type="string" cy:type="String"/>
      </att>
    </graphics>
  </node>
  <node id="45665" label="ENSMUSG00000045349" cy:nodeId="754">
    <graphics z="0.0" y="492.34597080566255" x="66.56057419935814">
      <att name="lockedVisualProperties" type="list" cy:type="List">
        <att name="NODE_LABEL" value="" type="string" cy:type="String"/>
      </att>
    </graphics>
  </node>
  <node id="45664" label="ENSMUSG00000045382" cy:nodeId="755">
    <graphics z="0.0" y="3.1980139575180146" x="220.77734055678002">
      <att name="lockedVisualProperties" type="list" cy:type="List">
        <att name="NODE_LABEL" value="" type="string" cy:type="String"/>
      </att>
    </graphics>
  </node>
  <node id="45663" label="ENSMUSG00000045441" cy:nodeId="756">
    <graphics z="0.0" y="-93.93163997314605" x="172.83944001356713">
      <att name="lockedVisualProperties" type="list" cy:type="List">
        <att name="NODE_LABEL" value="" type="string" cy:type="String"/>
      </att>
    </graphics>
  </node>
  <node id="45662" label="ENSMUSG00000045629" cy:nodeId="757">
    <graphics z="0.0" y="-190.8776467480484" x="-123.39199385484108">
      <att name="lockedVisualProperties" type="list" cy:type="List">
        <att name="NODE_LABEL" value="" type="string" cy:type="String"/>
      </att>
    </graphics>
  </node>
  <node id="45661" label="ENSMUSG00000045790" cy:nodeId="758">
    <graphics z="0.0" y="-175.07659083984527" x="46.96339860121361">
      <att name="lockedVisualProperties" type="list" cy:type="List">
        <att name="NODE_LABEL" value="" type="string" cy:type="String"/>
      </att>
    </graphics>
  </node>
  <node id="45660" label="ENSMUSG00000045896" cy:nodeId="759">
    <graphics z="0.0" y="-98.04733592651519" x="-101.4755204661692">
      <att name="lockedVisualProperties" type="list" cy:type="List">
        <att name="NODE_LABEL" value="" type="string" cy:type="String"/>
      </att>
    </graphics>
  </node>
  <node id="45659" label="ENSMUSG00000046058" cy:nodeId="760">
    <graphics z="0.0" y="270.07936924316255" x="-80.54128584702858">
      <att name="lockedVisualProperties" type="list" cy:type="List">
        <att name="NODE_LABEL" value="" type="string" cy:type="String"/>
      </att>
    </graphics>
  </node>
  <node id="45658" label="ENSMUSG00000046070" cy:nodeId="761">
    <graphics z="0.0" y="54.30883091308442" x="207.8196512715017">
      <att name="lockedVisualProperties" type="list" cy:type="List">
        <att name="NODE_LABEL" value="" type="string" cy:type="String"/>
      </att>
    </graphics>
  </node>
  <node id="45657" label="ENSMUSG00000046093" cy:nodeId="762">
    <graphics z="0.0" y="231.91387241699067" x="146.26040330092064">
      <att name="lockedVisualProperties" type="list" cy:type="List">
        <att name="NODE_LABEL" value="" type="string" cy:type="String"/>
      </att>
    </graphics>
  </node>
  <node id="45656" label="ENSMUSG00000046215" cy:nodeId="763">
    <graphics z="0.0" y="-108.99130946777495" x="106.9003569142019">
      <att name="lockedVisualProperties" type="list" cy:type="List">
        <att name="NODE_LABEL" value="" type="string" cy:type="String"/>
      </att>
    </graphics>
  </node>
  <node id="45655" label="ENSMUSG00000046223" cy:nodeId="764">
    <graphics z="0.0" y="-238.90492946289214" x="113.96246018568627">
      <att name="lockedVisualProperties" type="list" cy:type="List">
        <att name="NODE_LABEL" value="" type="string" cy:type="String"/>
      </att>
    </graphics>
  </node>
  <node id="45654" label="ENSMUSG00000046242" cy:nodeId="765">
    <graphics z="0.0" y="98.06340854980317" x="323.6916700855886">
      <att name="lockedVisualProperties" type="list" cy:type="List">
        <att name="NODE_LABEL" value="" type="string" cy:type="String"/>
      </att>
    </graphics>
  </node>
  <node id="45653" label="ENSMUSG00000046402" cy:nodeId="766">
    <graphics z="0.0" y="341.83278721191255" x="-174.76760420640358">
      <att name="lockedVisualProperties" type="list" cy:type="List">
        <att name="NODE_LABEL" value="" type="string" cy:type="String"/>
      </att>
    </graphics>
  </node>
  <node id="45652" label="ENSMUSG00000046546" cy:nodeId="767">
    <graphics z="0.0" y="116.60866611816255" x="183.76514115492455">
      <att name="lockedVisualProperties" type="list" cy:type="List">
        <att name="NODE_LABEL" value="" type="string" cy:type="String"/>
      </att>
    </graphics>
  </node>
  <node id="45651" label="ENSMUSG00000046550" cy:nodeId="768">
    <graphics z="0.0" y="-139.46176082275542" x="127.53213181654564">
      <att name="lockedVisualProperties" type="list" cy:type="List">
        <att name="NODE_LABEL" value="" type="string" cy:type="String"/>
      </att>
    </graphics>
  </node>
  <node id="45650" label="ENSMUSG00000046591" cy:nodeId="769">
    <graphics z="0.0" y="-179.4679330029312" x="48.228428508440174">
      <att name="lockedVisualProperties" type="list" cy:type="List">
        <att name="NODE_LABEL" value="" type="string" cy:type="String"/>
      </att>
    </graphics>
  </node>
  <node id="45649" label="ENSMUSG00000046668" cy:nodeId="770">
    <graphics z="0.0" y="-60.35461551330718" x="180.3039816872274">
      <att name="lockedVisualProperties" type="list" cy:type="List">
        <att name="NODE_LABEL" value="" type="string" cy:type="String"/>
      </att>
    </graphics>
  </node>
  <node id="45648" label="ENSMUSG00000046711" cy:nodeId="771">
    <graphics z="0.0" y="224.66091221191255" x="145.13600983778588">
      <att name="lockedVisualProperties" type="list" cy:type="List">
        <att name="NODE_LABEL" value="" type="string" cy:type="String"/>
      </att>
    </graphics>
  </node>
  <node id="45647" label="ENSMUSG00000046814" cy:nodeId="772">
    <graphics z="0.0" y="-133.26359492920074" x="140.09372391859642">
      <att name="lockedVisualProperties" type="list" cy:type="List">
        <att name="NODE_LABEL" value="" type="string" cy:type="String"/>
      </att>
    </graphics>
  </node>
  <node id="45646" label="ENSMUSG00000046826" cy:nodeId="773">
    <graphics z="0.0" y="-31.25678712509307" x="34.2106367603933">
      <att name="lockedVisualProperties" type="list" cy:type="List">
        <att name="NODE_LABEL" value="" type="string" cy:type="String"/>
      </att>
    </graphics>
  </node>
  <node id="45645" label="ENSMUSG00000047139" cy:nodeId="774">
    <graphics z="0.0" y="78.6128546557602" x="247.95793595472924">
      <att name="lockedVisualProperties" type="list" cy:type="List">
        <att name="NODE_LABEL" value="" type="string" cy:type="String"/>
      </att>
    </graphics>
  </node>
  <node id="45644" label="ENSMUSG00000047205" cy:nodeId="775">
    <graphics z="0.0" y="-50.73668223999175" x="-198.55855879624733">
      <att name="lockedVisualProperties" type="list" cy:type="List">
        <att name="NODE_LABEL" value="" type="string" cy:type="String"/>
      </att>
    </graphics>
  </node>
  <node id="45643" label="ENSMUSG00000047221" cy:nodeId="776">
    <graphics z="0.0" y="-38.87880736969146" x="-93.97268233140358">
      <att name="lockedVisualProperties" type="list" cy:type="List">
        <att name="NODE_LABEL" value="" type="string" cy:type="String"/>
      </att>
    </graphics>
  </node>
  <node id="45642" label="ENSMUSG00000047507" cy:nodeId="777">
    <graphics z="0.0" y="493.0055777392563" x="193.57210793654076">
      <att name="lockedVisualProperties" type="list" cy:type="List">
        <att name="NODE_LABEL" value="" type="string" cy:type="String"/>
      </att>
    </graphics>
  </node>
  <node id="45641" label="ENSMUSG00000047534" cy:nodeId="778">
    <graphics z="0.0" y="156.03807895995942" x="-89.82357344468483">
      <att name="lockedVisualProperties" type="list" cy:type="List">
        <att name="NODE_LABEL" value="" type="string" cy:type="String"/>
      </att>
    </graphics>
  </node>
  <node id="45640" label="ENSMUSG00000047747" cy:nodeId="779">
    <graphics z="0.0" y="129.25768345214692" x="41.95213761488549">
      <att name="lockedVisualProperties" type="list" cy:type="List">
        <att name="NODE_LABEL" value="" type="string" cy:type="String"/>
      </att>
    </graphics>
  </node>
  <node id="45639" label="ENSMUSG00000047797" cy:nodeId="780">
    <graphics z="0.0" y="-162.73082667968902" x="123.21292176405541">
      <att name="lockedVisualProperties" type="list" cy:type="List">
        <att name="NODE_LABEL" value="" type="string" cy:type="String"/>
      </att>
    </graphics>
  </node>
  <node id="45638" label="ENSMUSG00000047907" cy:nodeId="781">
    <graphics z="0.0" y="41.21678989745942" x="303.6726271168386">
      <att name="lockedVisualProperties" type="list" cy:type="List">
        <att name="NODE_LABEL" value="" type="string" cy:type="String"/>
      </att>
    </graphics>
  </node>
  <node id="45637" label="ENSMUSG00000047945" cy:nodeId="782">
    <graphics z="0.0" y="-30.760985676271048" x="-150.89840254624733">
      <att name="lockedVisualProperties" type="list" cy:type="List">
        <att name="NODE_LABEL" value="" type="string" cy:type="String"/>
      </att>
    </graphics>
  </node>
  <node id="45636" label="ENSMUSG00000047976" cy:nodeId="783">
    <graphics z="0.0" y="-27.429089848023978" x="239.4066473499929">
      <att name="lockedVisualProperties" type="list" cy:type="List">
        <att name="NODE_LABEL" value="" type="string" cy:type="String"/>
      </att>
    </graphics>
  </node>
  <node id="45635" label="ENSMUSG00000048058" cy:nodeId="784">
    <graphics z="0.0" y="237.99157017089692" x="-98.80358443101295">
      <att name="lockedVisualProperties" type="list" cy:type="List">
        <att name="NODE_LABEL" value="" type="string" cy:type="String"/>
      </att>
    </graphics>
  </node>
  <node id="45634" label="ENSMUSG00000048217" cy:nodeId="785">
    <graphics z="0.0" y="-84.82259303711089" x="103.0713316456472">
      <att name="lockedVisualProperties" type="list" cy:type="List">
        <att name="NODE_LABEL" value="" type="string" cy:type="String"/>
      </att>
    </graphics>
  </node>
  <node id="45633" label="ENSMUSG00000048349" cy:nodeId="786">
    <graphics z="0.0" y="-41.45577937744292" x="307.89465775648705">
      <att name="lockedVisualProperties" type="list" cy:type="List">
        <att name="NODE_LABEL" value="" type="string" cy:type="String"/>
      </att>
    </graphics>
  </node>
  <node id="45632" label="ENSMUSG00000048376" cy:nodeId="787">
    <graphics z="0.0" y="21.030838664549265" x="232.02689423719994">
      <att name="lockedVisualProperties" type="list" cy:type="List">
        <att name="NODE_LABEL" value="" type="string" cy:type="String"/>
      </att>
    </graphics>
  </node>
  <node id="45631" label="ENSMUSG00000048440" cy:nodeId="788">
    <graphics z="0.0" y="40.35924595214692" x="130.74882950941674">
      <att name="lockedVisualProperties" type="list" cy:type="List">
        <att name="NODE_LABEL" value="" type="string" cy:type="String"/>
      </att>
    </graphics>
  </node>
  <node id="45630" label="ENSMUSG00000048450" cy:nodeId="789">
    <graphics z="0.0" y="85.18413608886567" x="17.19006791273705">
      <att name="lockedVisualProperties" type="list" cy:type="List">
        <att name="NODE_LABEL" value="" type="string" cy:type="String"/>
      </att>
    </graphics>
  </node>
  <node id="45629" label="ENSMUSG00000048458" cy:nodeId="790">
    <graphics z="0.0" y="207.03652256347505" x="161.15848794142357">
      <att name="lockedVisualProperties" type="list" cy:type="List">
        <att name="NODE_LABEL" value="" type="string" cy:type="String"/>
      </att>
    </graphics>
  </node>
  <node id="45628" label="ENSMUSG00000048612" cy:nodeId="791">
    <graphics z="0.0" y="-247.2445443310562" x="126.21543564955346">
      <att name="lockedVisualProperties" type="list" cy:type="List">
        <att name="NODE_LABEL" value="" type="string" cy:type="String"/>
      </att>
    </graphics>
  </node>
  <node id="45627" label="ENSMUSG00000048644" cy:nodeId="792">
    <graphics z="0.0" y="4.980354960935983" x="280.1787764088308">
      <att name="lockedVisualProperties" type="list" cy:type="List">
        <att name="NODE_LABEL" value="" type="string" cy:type="String"/>
      </att>
    </graphics>
  </node>
  <node id="45626" label="ENSMUSG00000048965" cy:nodeId="793">
    <graphics z="0.0" y="168.75832432128755" x="114.90313401381127">
      <att name="lockedVisualProperties" type="list" cy:type="List">
        <att name="NODE_LABEL" value="" type="string" cy:type="String"/>
      </att>
    </graphics>
  </node>
  <node id="45625" label="ENSMUSG00000048970" cy:nodeId="794">
    <graphics z="0.0" y="-35.06595737121734" x="-332.7434648021067">
      <att name="lockedVisualProperties" type="list" cy:type="List">
        <att name="NODE_LABEL" value="" type="string" cy:type="String"/>
      </att>
    </graphics>
  </node>
  <node id="45624" label="ENSMUSG00000049038" cy:nodeId="795">
    <graphics z="0.0" y="-90.69439250610503" x="-56.669520710309826">
      <att name="lockedVisualProperties" type="list" cy:type="List">
        <att name="NODE_LABEL" value="" type="string" cy:type="String"/>
      </att>
    </graphics>
  </node>
  <node id="45623" label="ENSMUSG00000049184" cy:nodeId="796">
    <graphics z="0.0" y="207.0709616503891" x="167.55029931227318">
      <att name="lockedVisualProperties" type="list" cy:type="List">
        <att name="NODE_LABEL" value="" type="string" cy:type="String"/>
      </att>
    </graphics>
  </node>
  <node id="45622" label="ENSMUSG00000049288" cy:nodeId="797">
    <graphics z="0.0" y="-198.53586513183745" x="-8.073710773786388">
      <att name="lockedVisualProperties" type="list" cy:type="List">
        <att name="NODE_LABEL" value="" type="string" cy:type="String"/>
      </att>
    </graphics>
  </node>
  <node id="45621" label="ENSMUSG00000049493" cy:nodeId="798">
    <graphics z="0.0" y="106.81630771972505" x="68.75233140150658">
      <att name="lockedVisualProperties" type="list" cy:type="List">
        <att name="NODE_LABEL" value="" type="string" cy:type="String"/>
      </att>
    </graphics>
  </node>
  <node id="45620" label="ENSMUSG00000049536" cy:nodeId="799">
    <graphics z="0.0" y="430.46086948730317" x="-215.72762617905983">
      <att name="lockedVisualProperties" type="list" cy:type="List">
        <att name="NODE_LABEL" value="" type="string" cy:type="String"/>
      </att>
    </graphics>
  </node>
  <node id="45619" label="ENSMUSG00000049551" cy:nodeId="800">
    <graphics z="0.0" y="249.8710562548813" x="-117.33907637437233">
      <att name="lockedVisualProperties" type="list" cy:type="List">
        <att name="NODE_LABEL" value="" type="string" cy:type="String"/>
      </att>
    </graphics>
  </node>
  <node id="45618" label="ENSMUSG00000049580" cy:nodeId="801">
    <graphics z="0.0" y="250.38799351074067" x="49.86559739271752">
      <att name="lockedVisualProperties" type="list" cy:type="List">
        <att name="NODE_LABEL" value="" type="string" cy:type="String"/>
      </att>
    </graphics>
  </node>
  <node id="45617" label="ENSMUSG00000049588" cy:nodeId="802">
    <graphics z="0.0" y="481.07473057128755" x="-91.44710860093483">
      <att name="lockedVisualProperties" type="list" cy:type="List">
        <att name="NODE_LABEL" value="" type="string" cy:type="String"/>
      </att>
    </graphics>
  </node>
  <node id="45616" label="ENSMUSG00000049690" cy:nodeId="803">
    <graphics z="0.0" y="-54.98459369323882" x="223.64595856825463">
      <att name="lockedVisualProperties" type="list" cy:type="List">
        <att name="NODE_LABEL" value="" type="string" cy:type="String"/>
      </att>
    </graphics>
  </node>
  <node id="45615" label="ENSMUSG00000049723" cy:nodeId="804">
    <graphics z="0.0" y="296.12673252441255" x="210.88945069471947">
      <att name="lockedVisualProperties" type="list" cy:type="List">
        <att name="NODE_LABEL" value="" type="string" cy:type="String"/>
      </att>
    </graphics>
  </node>
  <node id="45614" label="ENSMUSG00000049866" cy:nodeId="805">
    <graphics z="0.0" y="38.13530033447114" x="-57.106471393903576">
      <att name="lockedVisualProperties" type="list" cy:type="List">
        <att name="NODE_LABEL" value="" type="string" cy:type="String"/>
      </att>
    </graphics>
  </node>
  <node id="45613" label="ENSMUSG00000049878" cy:nodeId="806">
    <graphics z="0.0" y="-2.1632607617202666" x="114.32851090590111">
      <att name="lockedVisualProperties" type="list" cy:type="List">
        <att name="NODE_LABEL" value="" type="string" cy:type="String"/>
      </att>
    </graphics>
  </node>
  <node id="45612" label="ENSMUSG00000050064" cy:nodeId="807">
    <graphics z="0.0" y="-116.49938136718902" x="-61.99763045152076">
      <att name="lockedVisualProperties" type="list" cy:type="List">
        <att name="NODE_LABEL" value="" type="string" cy:type="String"/>
      </att>
    </graphics>
  </node>
  <node id="45611" label="ENSMUSG00000050132" cy:nodeId="808">
    <graphics z="0.0" y="291.1707388720688" x="213.00037827650658">
      <att name="lockedVisualProperties" type="list" cy:type="List">
        <att name="NODE_LABEL" value="" type="string" cy:type="String"/>
      </att>
    </graphics>
  </node>
  <node id="45610" label="ENSMUSG00000050148" cy:nodeId="809">
    <graphics z="0.0" y="-220.94167262695464" x="37.1652266041433">
      <att name="lockedVisualProperties" type="list" cy:type="List">
        <att name="NODE_LABEL" value="" type="string" cy:type="String"/>
      </att>
    </graphics>
  </node>
  <node id="45609" label="ENSMUSG00000050323" cy:nodeId="810">
    <graphics z="0.0" y="-145.22775966308745" x="214.07639756361596">
      <att name="lockedVisualProperties" type="list" cy:type="List">
        <att name="NODE_LABEL" value="" type="string" cy:type="String"/>
      </att>
    </graphics>
  </node>
  <node id="45608" label="ENSMUSG00000050335" cy:nodeId="811">
    <graphics z="0.0" y="224.69118564941255" x="196.54089799086205">
      <att name="lockedVisualProperties" type="list" cy:type="List">
        <att name="NODE_LABEL" value="" type="string" cy:type="String"/>
      </att>
    </graphics>
  </node>
  <node id="45607" label="ENSMUSG00000050677" cy:nodeId="812">
    <graphics z="0.0" y="251.0208365283188" x="230.27548661390892">
      <att name="lockedVisualProperties" type="list" cy:type="List">
        <att name="NODE_LABEL" value="" type="string" cy:type="String"/>
      </att>
    </graphics>
  </node>
  <node id="45606" label="ENSMUSG00000050721" cy:nodeId="813">
    <graphics z="0.0" y="108.03318088867036" x="108.33081498304955">
      <att name="lockedVisualProperties" type="list" cy:type="List">
        <att name="NODE_LABEL" value="" type="string" cy:type="String"/>
      </att>
    </graphics>
  </node>
  <node id="45605" label="ENSMUSG00000050737" cy:nodeId="814">
    <graphics z="0.0" y="-167.85991603515777" x="-37.18348250230201">
      <att name="lockedVisualProperties" type="list" cy:type="List">
        <att name="NODE_LABEL" value="" type="string" cy:type="String"/>
      </att>
    </graphics>
  </node>
  <node id="45604" label="ENSMUSG00000050777" cy:nodeId="815">
    <graphics z="0.0" y="-52.617904011231985" x="63.078831340471424">
      <att name="lockedVisualProperties" type="list" cy:type="List">
        <att name="NODE_LABEL" value="" type="string" cy:type="String"/>
      </att>
    </graphics>
  </node>
  <node id="45603" label="ENSMUSG00000050953" cy:nodeId="816">
    <graphics z="0.0" y="133.5412985644516" x="-5.270762775739513">
      <att name="lockedVisualProperties" type="list" cy:type="List">
        <att name="NODE_LABEL" value="" type="string" cy:type="String"/>
      </att>
    </graphics>
  </node>
  <node id="45602" label="ENSMUSG00000051076" cy:nodeId="817">
    <graphics z="0.0" y="-252.76111537597808" x="-4.862712238630138">
      <att name="lockedVisualProperties" type="list" cy:type="List">
        <att name="NODE_LABEL" value="" type="string" cy:type="String"/>
      </att>
    </graphics>
  </node>
  <node id="45601" label="ENSMUSG00000051343" cy:nodeId="818">
    <graphics z="0.0" y="-172.12981349609527" x="-143.71468672593483">
      <att name="lockedVisualProperties" type="list" cy:type="List">
        <att name="NODE_LABEL" value="" type="string" cy:type="String"/>
      </att>
    </graphics>
  </node>
  <node id="45600" label="ENSMUSG00000051359" cy:nodeId="819">
    <graphics z="0.0" y="260.1455923876938" x="-242.98730025132545">
      <att name="lockedVisualProperties" type="list" cy:type="List">
        <att name="NODE_LABEL" value="" type="string" cy:type="String"/>
      </att>
    </graphics>
  </node>
  <node id="45599" label="ENSMUSG00000051727" cy:nodeId="820">
    <graphics z="0.0" y="-87.91245967529449" x="354.6955458180105">
      <att name="lockedVisualProperties" type="list" cy:type="List">
        <att name="NODE_LABEL" value="" type="string" cy:type="String"/>
      </att>
    </graphics>
  </node>
  <node id="45598" label="ENSMUSG00000051977" cy:nodeId="821">
    <graphics z="0.0" y="-43.38342982910308" x="-316.6593278392161">
      <att name="lockedVisualProperties" type="list" cy:type="List">
        <att name="NODE_LABEL" value="" type="string" cy:type="String"/>
      </att>
    </graphics>
  </node>
  <node id="45597" label="ENSMUSG00000051980" cy:nodeId="822">
    <graphics z="0.0" y="233.28933018066255" x="-15.866771076520763">
      <att name="lockedVisualProperties" type="list" cy:type="List">
        <att name="NODE_LABEL" value="" type="string" cy:type="String"/>
      </att>
    </graphics>
  </node>
  <node id="45596" label="ENSMUSG00000052087" cy:nodeId="823">
    <graphics z="0.0" y="287.7714468798813" x="-102.37527022202858">
      <att name="lockedVisualProperties" type="list" cy:type="List">
        <att name="NODE_LABEL" value="" type="string" cy:type="String"/>
      </att>
    </graphics>
  </node>
  <node id="45595" label="ENSMUSG00000052105" cy:nodeId="824">
    <graphics z="0.0" y="233.1768423876938" x="-88.58803877671608">
      <att name="lockedVisualProperties" type="list" cy:type="List">
        <att name="NODE_LABEL" value="" type="string" cy:type="String"/>
      </att>
    </graphics>
  </node>
  <node id="45594" label="ENSMUSG00000052135" cy:nodeId="825">
    <graphics z="0.0" y="133.29477756835786" x="-148.23403487046608">
      <att name="lockedVisualProperties" type="list" cy:type="List">
        <att name="NODE_LABEL" value="" type="string" cy:type="String"/>
      </att>
    </graphics>
  </node>
  <node id="45593" label="ENSMUSG00000052392" cy:nodeId="826">
    <graphics z="0.0" y="-108.05738765381011" x="100.27875962416283">
      <att name="lockedVisualProperties" type="list" cy:type="List">
        <att name="NODE_LABEL" value="" type="string" cy:type="String"/>
      </att>
    </graphics>
  </node>
  <node id="45592" label="ENSMUSG00000052560" cy:nodeId="827">
    <graphics z="0.0" y="-283.26264125488433" x="267.3249403492605">
      <att name="lockedVisualProperties" type="list" cy:type="List">
        <att name="NODE_LABEL" value="" type="string" cy:type="String"/>
      </att>
    </graphics>
  </node>
  <node id="45591" label="ENSMUSG00000052921" cy:nodeId="828">
    <graphics z="0.0" y="119.53466099120942" x="450.8457685963308">
      <att name="lockedVisualProperties" type="list" cy:type="List">
        <att name="NODE_LABEL" value="" type="string" cy:type="String"/>
      </att>
    </graphics>
  </node>
  <node id="45590" label="ENSMUSG00000053046" cy:nodeId="829">
    <graphics z="0.0" y="-292.55145961425933" x="252.52666154066674">
      <att name="lockedVisualProperties" type="list" cy:type="List">
        <att name="NODE_LABEL" value="" type="string" cy:type="String"/>
      </att>
    </graphics>
  </node>
  <node id="45589" label="ENSMUSG00000053054" cy:nodeId="830">
    <graphics z="0.0" y="177.46245640136567" x="-43.92405257066139">
      <att name="lockedVisualProperties" type="list" cy:type="List">
        <att name="NODE_LABEL" value="" type="string" cy:type="String"/>
      </att>
    </graphics>
  </node>
  <node id="45588" label="ENSMUSG00000053080" cy:nodeId="831">
    <graphics z="0.0" y="123.8814322314438" x="96.70623459974877">
      <att name="lockedVisualProperties" type="list" cy:type="List">
        <att name="NODE_LABEL" value="" type="string" cy:type="String"/>
      </att>
    </graphics>
  </node>
  <node id="45587" label="ENSMUSG00000053199" cy:nodeId="832">
    <graphics z="0.0" y="156.7468649707016" x="229.0275541798269">
      <att name="lockedVisualProperties" type="list" cy:type="List">
        <att name="NODE_LABEL" value="" type="string" cy:type="String"/>
      </att>
    </graphics>
  </node>
  <node id="45586" label="ENSMUSG00000053317" cy:nodeId="833">
    <graphics z="0.0" y="120.7234732470688" x="-78.58192000230201">
      <att name="lockedVisualProperties" type="list" cy:type="List">
        <att name="NODE_LABEL" value="" type="string" cy:type="String"/>
      </att>
    </graphics>
  </node>
  <node id="45585" label="ENSMUSG00000053334" cy:nodeId="834">
    <graphics z="0.0" y="-27.22465879104766" x="-173.3545487864817">
      <att name="lockedVisualProperties" type="list" cy:type="List">
        <att name="NODE_LABEL" value="" type="string" cy:type="String"/>
      </att>
    </graphics>
  </node>
  <node id="45584" label="ENSMUSG00000053460" cy:nodeId="835">
    <graphics z="0.0" y="-190.2837289013687" x="-54.41480574448951">
      <att name="lockedVisualProperties" type="list" cy:type="List">
        <att name="NODE_LABEL" value="" type="string" cy:type="String"/>
      </att>
    </graphics>
  </node>
  <node id="45583" label="ENSMUSG00000053470" cy:nodeId="836">
    <graphics z="0.0" y="254.72304600097505" x="30.3482100025808">
      <att name="lockedVisualProperties" type="list" cy:type="List">
        <att name="NODE_LABEL" value="" type="string" cy:type="String"/>
      </att>
    </graphics>
  </node>
  <node id="45582" label="ENSMUSG00000053580" cy:nodeId="837">
    <graphics z="0.0" y="-158.64089137695464" x="100.79444565931908">
      <att name="lockedVisualProperties" type="list" cy:type="List">
        <att name="NODE_LABEL" value="" type="string" cy:type="String"/>
      </att>
    </graphics>
  </node>
  <node id="45581" label="ENSMUSG00000053702" cy:nodeId="838">
    <graphics z="0.0" y="356.5445181689438" x="266.9838301197683">
      <att name="lockedVisualProperties" type="list" cy:type="List">
        <att name="NODE_LABEL" value="" type="string" cy:type="String"/>
      </att>
    </graphics>
  </node>
  <node id="45580" label="ENSMUSG00000053765" cy:nodeId="839">
    <graphics z="0.0" y="-393.68781215332183" x="91.40318741957299">
      <att name="lockedVisualProperties" type="list" cy:type="List">
        <att name="NODE_LABEL" value="" type="string" cy:type="String"/>
      </att>
    </graphics>
  </node>
  <node id="45579" label="ENSMUSG00000053768" cy:nodeId="840">
    <graphics z="0.0" y="29.14696567870942" x="-225.5674394114817">
      <att name="lockedVisualProperties" type="list" cy:type="List">
        <att name="NODE_LABEL" value="" type="string" cy:type="String"/>
      </att>
    </graphics>
  </node>
  <node id="45578" label="ENSMUSG00000053783" cy:nodeId="841">
    <graphics z="0.0" y="62.334000285643015" x="-211.41390547593483">
      <att name="lockedVisualProperties" type="list" cy:type="List">
        <att name="NODE_LABEL" value="" type="string" cy:type="String"/>
      </att>
    </graphics>
  </node>
  <node id="45577" label="ENSMUSG00000053846" cy:nodeId="842">
    <graphics z="0.0" y="199.10520237304536" x="-6.050731037458263">
      <att name="lockedVisualProperties" type="list" cy:type="List">
        <att name="NODE_LABEL" value="" type="string" cy:type="String"/>
      </att>
    </graphics>
  </node>
  <node id="45576" label="ENSMUSG00000054150" cy:nodeId="843">
    <graphics z="0.0" y="142.84014194824067" x="89.54944291273705">
      <att name="lockedVisualProperties" type="list" cy:type="List">
        <att name="NODE_LABEL" value="" type="string" cy:type="String"/>
      </att>
    </graphics>
  </node>
  <node id="45575" label="ENSMUSG00000054342" cy:nodeId="844">
    <graphics z="0.0" y="186.41709202148286" x="-34.16981062730201">
      <att name="lockedVisualProperties" type="list" cy:type="List">
        <att name="NODE_LABEL" value="" type="string" cy:type="String"/>
      </att>
    </graphics>
  </node>
  <node id="45574" label="ENSMUSG00000054474" cy:nodeId="845">
    <graphics z="0.0" y="-152.96162349365386" x="123.03201356093041">
      <att name="lockedVisualProperties" type="list" cy:type="List">
        <att name="NODE_LABEL" value="" type="string" cy:type="String"/>
      </att>
    </graphics>
  </node>
  <node id="45573" label="ENSMUSG00000054582" cy:nodeId="846">
    <graphics z="0.0" y="-124.92870265625152" x="253.26045670668236">
      <att name="lockedVisualProperties" type="list" cy:type="List">
        <att name="NODE_LABEL" value="" type="string" cy:type="String"/>
      </att>
    </graphics>
  </node>
  <node id="45572" label="ENSMUSG00000054717" cy:nodeId="847">
    <graphics z="0.0" y="183.2890250048813" x="-7.275340412458263">
      <att name="lockedVisualProperties" type="list" cy:type="List">
        <att name="NODE_LABEL" value="" type="string" cy:type="String"/>
      </att>
    </graphics>
  </node>
  <node id="45571" label="ENSMUSG00000054764" cy:nodeId="848">
    <graphics z="0.0" y="-23.500859562379446" x="196.16925110975853">
      <att name="lockedVisualProperties" type="list" cy:type="List">
        <att name="NODE_LABEL" value="" type="string" cy:type="String"/>
      </att>
    </graphics>
  </node>
  <node id="45570" label="ENSMUSG00000054793" cy:nodeId="849">
    <graphics z="0.0" y="112.09604709960786" x="391.22717728773705">
      <att name="lockedVisualProperties" type="list" cy:type="List">
        <att name="NODE_LABEL" value="" type="string" cy:type="String"/>
      </att>
    </graphics>
  </node>
  <node id="45569" label="ENSMUSG00000054855" cy:nodeId="850">
    <graphics z="0.0" y="49.54485386230317" x="164.6132647053396">
      <att name="lockedVisualProperties" type="list" cy:type="List">
        <att name="NODE_LABEL" value="" type="string" cy:type="String"/>
      </att>
    </graphics>
  </node>
  <node id="45568" label="ENSMUSG00000054893" cy:nodeId="851">
    <graphics z="0.0" y="-149.39030391357574" x="-136.61678633530983">
      <att name="lockedVisualProperties" type="list" cy:type="List">
        <att name="NODE_LABEL" value="" type="string" cy:type="String"/>
      </att>
    </graphics>
  </node>
  <node id="45567" label="ENSMUSG00000054967" cy:nodeId="852">
    <graphics z="0.0" y="-28.426863972169485" x="228.56476655165307">
      <att name="lockedVisualProperties" type="list" cy:type="List">
        <att name="NODE_LABEL" value="" type="string" cy:type="String"/>
      </att>
    </graphics>
  </node>
  <node id="45566" label="ENSMUSG00000055150" cy:nodeId="853">
    <graphics z="0.0" y="299.3735281787094" x="147.47514214674584">
      <att name="lockedVisualProperties" type="list" cy:type="List">
        <att name="NODE_LABEL" value="" type="string" cy:type="String"/>
      </att>
    </graphics>
  </node>
  <node id="45565" label="ENSMUSG00000055733" cy:nodeId="854">
    <graphics z="0.0" y="-198.82318812988433" x="171.21908631483666">
      <att name="lockedVisualProperties" type="list" cy:type="List">
        <att name="NODE_LABEL" value="" type="string" cy:type="String"/>
      </att>
    </graphics>
  </node>
  <node id="45564" label="ENSMUSG00000055745" cy:nodeId="855">
    <graphics z="0.0" y="253.1536490283188" x="255.679554607073">
      <att name="lockedVisualProperties" type="list" cy:type="List">
        <att name="NODE_LABEL" value="" type="string" cy:type="String"/>
      </att>
    </graphics>
  </node>
  <node id="45563" label="ENSMUSG00000055809" cy:nodeId="856">
    <graphics z="0.0" y="227.67055576660005" x="-27.832972858747326">
      <att name="lockedVisualProperties" type="list" cy:type="List">
        <att name="NODE_LABEL" value="" type="string" cy:type="String"/>
      </att>
    </graphics>
  </node>
  <node id="45562" label="ENSMUSG00000055862" cy:nodeId="857">
    <graphics z="0.0" y="12.868618663328562" x="157.70308747450463">
      <att name="lockedVisualProperties" type="list" cy:type="List">
        <att name="NODE_LABEL" value="" type="string" cy:type="String"/>
      </att>
    </graphics>
  </node>
  <node id="45561" label="ENSMUSG00000055963" cy:nodeId="858">
    <graphics z="0.0" y="-83.06413203857574" x="277.81206956068627">
      <att name="lockedVisualProperties" type="list" cy:type="List">
        <att name="NODE_LABEL" value="" type="string" cy:type="String"/>
      </att>
    </graphics>
  </node>
  <node id="45560" label="ENSMUSG00000055980" cy:nodeId="859">
    <graphics z="0.0" y="35.40049808837739" x="-218.5846513255442">
      <att name="lockedVisualProperties" type="list" cy:type="List">
        <att name="NODE_LABEL" value="" type="string" cy:type="String"/>
      </att>
    </graphics>
  </node>
  <node id="45559" label="ENSMUSG00000056069" cy:nodeId="860">
    <graphics z="0.0" y="164.11866062499848" x="-94.3566239817942">
      <att name="lockedVisualProperties" type="list" cy:type="List">
        <att name="NODE_LABEL" value="" type="string" cy:type="String"/>
      </att>
    </graphics>
  </node>
  <node id="45558" label="ENSMUSG00000056185" cy:nodeId="861">
    <graphics z="0.0" y="-100.40882045410308" x="-165.39440474351295">
      <att name="lockedVisualProperties" type="list" cy:type="List">
        <att name="NODE_LABEL" value="" type="string" cy:type="String"/>
      </att>
    </graphics>
  </node>
  <node id="45557" label="ENSMUSG00000056529" cy:nodeId="862">
    <graphics z="0.0" y="-115.85080653808745" x="-161.10311446030983">
      <att name="lockedVisualProperties" type="list" cy:type="List">
        <att name="NODE_LABEL" value="" type="string" cy:type="String"/>
      </att>
    </graphics>
  </node>
  <node id="45556" label="ENSMUSG00000056531" cy:nodeId="863">
    <graphics z="0.0" y="264.21852939941255" x="-223.78567061265358">
      <att name="lockedVisualProperties" type="list" cy:type="List">
        <att name="NODE_LABEL" value="" type="string" cy:type="String"/>
      </att>
    </graphics>
  </node>
  <node id="45555" label="ENSMUSG00000056632" cy:nodeId="864">
    <graphics z="0.0" y="94.26308506347505" x="553.3378645435964">
      <att name="lockedVisualProperties" type="list" cy:type="List">
        <att name="NODE_LABEL" value="" type="string" cy:type="String"/>
      </att>
    </graphics>
  </node>
  <node id="45554" label="ENSMUSG00000056737" cy:nodeId="865">
    <graphics z="0.0" y="-59.6884148754898" x="121.3963285938894">
      <att name="lockedVisualProperties" type="list" cy:type="List">
        <att name="NODE_LABEL" value="" type="string" cy:type="String"/>
      </att>
    </graphics>
  </node>
  <node id="45553" label="ENSMUSG00000056832" cy:nodeId="866">
    <graphics z="0.0" y="-192.4678109326187" x="170.3356687084829">
      <att name="lockedVisualProperties" type="list" cy:type="List">
        <att name="NODE_LABEL" value="" type="string" cy:type="String"/>
      </att>
    </graphics>
  </node>
  <node id="45552" label="ENSMUSG00000056895" cy:nodeId="867">
    <graphics z="0.0" y="-13.056840244752493" x="143.91037430922142">
      <att name="lockedVisualProperties" type="list" cy:type="List">
        <att name="NODE_LABEL" value="" type="string" cy:type="String"/>
      </att>
    </graphics>
  </node>
  <node id="45551" label="ENSMUSG00000057092" cy:nodeId="868">
    <graphics z="0.0" y="-9.204442326051321" x="107.17957749525658">
      <att name="lockedVisualProperties" type="list" cy:type="List">
        <att name="NODE_LABEL" value="" type="string" cy:type="String"/>
      </att>
    </graphics>
  </node>
  <node id="45550" label="ENSMUSG00000057335" cy:nodeId="869">
    <graphics z="0.0" y="-172.11998683593902" x="190.51874604384057">
      <att name="lockedVisualProperties" type="list" cy:type="List">
        <att name="NODE_LABEL" value="" type="string" cy:type="String"/>
      </att>
    </graphics>
  </node>
  <node id="45549" label="ENSMUSG00000057604" cy:nodeId="870">
    <graphics z="0.0" y="112.87723606445161" x="61.4804121510183">
      <att name="lockedVisualProperties" type="list" cy:type="List">
        <att name="NODE_LABEL" value="" type="string" cy:type="String"/>
      </att>
    </graphics>
  </node>
  <node id="45548" label="ENSMUSG00000057719" cy:nodeId="871">
    <graphics z="0.0" y="-103.83916408203277" x="283.2706266895925">
      <att name="lockedVisualProperties" type="list" cy:type="List">
        <att name="NODE_LABEL" value="" type="string" cy:type="String"/>
      </att>
    </graphics>
  </node>
  <node id="45547" label="ENSMUSG00000058070" cy:nodeId="872">
    <graphics z="0.0" y="116.00066440917817" x="-258.59789595445045">
      <att name="lockedVisualProperties" type="list" cy:type="List">
        <att name="NODE_LABEL" value="" type="string" cy:type="String"/>
      </att>
    </graphics>
  </node>
  <node id="45546" label="ENSMUSG00000058145" cy:nodeId="873">
    <graphics z="0.0" y="102.66591709472505" x="236.76648774305932">
      <att name="lockedVisualProperties" type="list" cy:type="List">
        <att name="NODE_LABEL" value="" type="string" cy:type="String"/>
      </att>
    </graphics>
  </node>
  <node id="45545" label="ENSMUSG00000058290" cy:nodeId="874">
    <graphics z="0.0" y="204.62990635253755" x="-10.838206623395763">
      <att name="lockedVisualProperties" type="list" cy:type="List">
        <att name="NODE_LABEL" value="" type="string" cy:type="String"/>
      </att>
    </graphics>
  </node>
  <node id="45544" label="ENSMUSG00000058454" cy:nodeId="875">
    <graphics z="0.0" y="-16.2666505017105" x="-26.279155109723888">
      <att name="lockedVisualProperties" type="list" cy:type="List">
        <att name="NODE_LABEL" value="" type="string" cy:type="String"/>
      </att>
    </graphics>
  </node>
  <node id="45543" label="ENSMUSG00000058672" cy:nodeId="876">
    <graphics z="0.0" y="152.62946384765473" x="138.06357255140892">
      <att name="lockedVisualProperties" type="list" cy:type="List">
        <att name="NODE_LABEL" value="" type="string" cy:type="String"/>
      </att>
    </graphics>
  </node>
  <node id="45542" label="ENSMUSG00000058975" cy:nodeId="877">
    <graphics z="0.0" y="-31.648312870484915" x="232.0776030079519">
      <att name="lockedVisualProperties" type="list" cy:type="List">
        <att name="NODE_LABEL" value="" type="string" cy:type="String"/>
      </att>
    </graphics>
  </node>
  <node id="45541" label="ENSMUSG00000059013" cy:nodeId="878">
    <graphics z="0.0" y="171.88886326171723" x="190.9077745930349">
      <att name="lockedVisualProperties" type="list" cy:type="List">
        <att name="NODE_LABEL" value="" type="string" cy:type="String"/>
      </att>
    </graphics>
  </node>
  <node id="45540" label="ENSMUSG00000059401" cy:nodeId="879">
    <graphics z="0.0" y="-122.48703700683745" x="30.060581828752674">
      <att name="lockedVisualProperties" type="list" cy:type="List">
        <att name="NODE_LABEL" value="" type="string" cy:type="String"/>
      </att>
    </graphics>
  </node>
  <node id="45539" label="ENSMUSG00000059412" cy:nodeId="880">
    <graphics z="0.0" y="368.25176304199067" x="317.33574357191674">
      <att name="lockedVisualProperties" type="list" cy:type="List">
        <att name="NODE_LABEL" value="" type="string" cy:type="String"/>
      </att>
    </graphics>
  </node>
  <node id="45538" label="ENSMUSG00000059493" cy:nodeId="881">
    <graphics z="0.0" y="283.77642124511567" x="84.35297837416283">
      <att name="lockedVisualProperties" type="list" cy:type="List">
        <att name="NODE_LABEL" value="" type="string" cy:type="String"/>
      </att>
    </graphics>
  </node>
  <node id="45537" label="ENSMUSG00000059540" cy:nodeId="882">
    <graphics z="0.0" y="36.429703410643015" x="11.6089521900808">
      <att name="lockedVisualProperties" type="list" cy:type="List">
        <att name="NODE_LABEL" value="" type="string" cy:type="String"/>
      </att>
    </graphics>
  </node>
  <node id="45536" label="ENSMUSG00000059743" cy:nodeId="883">
    <graphics z="0.0" y="-202.37778407714995" x="264.15478959242455">
      <att name="lockedVisualProperties" type="list" cy:type="List">
        <att name="NODE_LABEL" value="" type="string" cy:type="String"/>
      </att>
    </graphics>
  </node>
  <node id="45535" label="ENSMUSG00000059824" cy:nodeId="884">
    <graphics z="0.0" y="109.08876865722505" x="-127.0498612864817">
      <att name="lockedVisualProperties" type="list" cy:type="List">
        <att name="NODE_LABEL" value="" type="string" cy:type="String"/>
      </att>
    </graphics>
  </node>
  <node id="45534" label="ENSMUSG00000059970" cy:nodeId="885">
    <graphics z="0.0" y="355.5218436083969" x="-173.74120650132545">
      <att name="lockedVisualProperties" type="list" cy:type="List">
        <att name="NODE_LABEL" value="" type="string" cy:type="String"/>
      </att>
    </graphics>
  </node>
  <node id="45533" label="ENSMUSG00000059991" cy:nodeId="886">
    <graphics z="0.0" y="211.27843540527192" x="71.24078049818627">
      <att name="lockedVisualProperties" type="list" cy:type="List">
        <att name="NODE_LABEL" value="" type="string" cy:type="String"/>
      </att>
    </graphics>
  </node>
  <node id="45532" label="ENSMUSG00000060176" cy:nodeId="887">
    <graphics z="0.0" y="-209.74236232422027" x="-170.7462724192942">
      <att name="lockedVisualProperties" type="list" cy:type="List">
        <att name="NODE_LABEL" value="" type="string" cy:type="String"/>
      </att>
    </graphics>
  </node>
  <node id="45531" label="ENSMUSG00000060301" cy:nodeId="888">
    <graphics z="0.0" y="43.708397563475046" x="-239.31710371812233">
      <att name="lockedVisualProperties" type="list" cy:type="List">
        <att name="NODE_LABEL" value="" type="string" cy:type="String"/>
      </att>
    </graphics>
  </node>
  <node id="45530" label="ENSMUSG00000060397" cy:nodeId="889">
    <graphics z="0.0" y="307.9140555224594" x="-31.14147505601295">
      <att name="lockedVisualProperties" type="list" cy:type="List">
        <att name="NODE_LABEL" value="" type="string" cy:type="String"/>
      </att>
    </graphics>
  </node>
  <node id="45529" label="ENSMUSG00000060487" cy:nodeId="890">
    <graphics z="0.0" y="-192.95441371582183" x="223.74354233900658">
      <att name="lockedVisualProperties" type="list" cy:type="List">
        <att name="NODE_LABEL" value="" type="string" cy:type="String"/>
      </att>
    </graphics>
  </node>
  <node id="45528" label="ENSMUSG00000060733" cy:nodeId="891">
    <graphics z="0.0" y="-255.60185939453277" x="-34.45945296128639">
      <att name="lockedVisualProperties" type="list" cy:type="List">
        <att name="NODE_LABEL" value="" type="string" cy:type="String"/>
      </att>
    </graphics>
  </node>
  <node id="45527" label="ENSMUSG00000060962" cy:nodeId="892">
    <graphics z="0.0" y="365.07097690917817" x="313.17732682386986">
      <att name="lockedVisualProperties" type="list" cy:type="List">
        <att name="NODE_LABEL" value="" type="string" cy:type="String"/>
      </att>
    </graphics>
  </node>
  <node id="45526" label="ENSMUSG00000061397" cy:nodeId="893">
    <graphics z="0.0" y="-263.03993922851714" x="-221.96529707749733">
      <att name="lockedVisualProperties" type="list" cy:type="List">
        <att name="NODE_LABEL" value="" type="string" cy:type="String"/>
      </att>
    </graphics>
  </node>
  <node id="45525" label="ENSMUSG00000061531" cy:nodeId="894">
    <graphics z="0.0" y="230.61205356933442" x="-22.96325239976295">
      <att name="lockedVisualProperties" type="list" cy:type="List">
        <att name="NODE_LABEL" value="" type="string" cy:type="String"/>
      </att>
    </graphics>
  </node>
  <node id="45524" label="ENSMUSG00000061578" cy:nodeId="895">
    <graphics z="0.0" y="169.58107822753755" x="305.0688215748464">
      <att name="lockedVisualProperties" type="list" cy:type="List">
        <att name="NODE_LABEL" value="" type="string" cy:type="String"/>
      </att>
    </graphics>
  </node>
  <node id="45523" label="ENSMUSG00000061607" cy:nodeId="896">
    <graphics z="0.0" y="8.699310954588327" x="-95.75231489976295">
      <att name="lockedVisualProperties" type="list" cy:type="List">
        <att name="NODE_LABEL" value="" type="string" cy:type="String"/>
      </att>
    </graphics>
  </node>
  <node id="45522" label="ENSMUSG00000062070" cy:nodeId="897">
    <graphics z="0.0" y="140.83884495117036" x="79.34009232679955">
      <att name="lockedVisualProperties" type="list" cy:type="List">
        <att name="NODE_LABEL" value="" type="string" cy:type="String"/>
      </att>
    </graphics>
  </node>
  <node id="45521" label="ENSMUSG00000062078" cy:nodeId="898">
    <graphics z="0.0" y="-87.23239452026519" x="-77.64283308823951">
      <att name="lockedVisualProperties" type="list" cy:type="List">
        <att name="NODE_LABEL" value="" type="string" cy:type="String"/>
      </att>
    </graphics>
  </node>
  <node id="45520" label="ENSMUSG00000062248" cy:nodeId="899">
    <graphics z="0.0" y="155.96247166015473" x="146.3113562122976">
      <att name="lockedVisualProperties" type="list" cy:type="List">
        <att name="NODE_LABEL" value="" type="string" cy:type="String"/>
      </att>
    </graphics>
  </node>
  <node id="45519" label="ENSMUSG00000062252" cy:nodeId="900">
    <graphics z="0.0" y="14.627808269041452" x="369.38603654066674">
      <att name="lockedVisualProperties" type="list" cy:type="List">
        <att name="NODE_LABEL" value="" type="string" cy:type="String"/>
      </att>
    </graphics>
  </node>
  <node id="45518" label="ENSMUSG00000062683" cy:nodeId="901">
    <graphics z="0.0" y="131.27582615234223" x="-88.4788163646067">
      <att name="lockedVisualProperties" type="list" cy:type="List">
        <att name="NODE_LABEL" value="" type="string" cy:type="String"/>
      </att>
    </graphics>
  </node>
  <node id="45517" label="ENSMUSG00000062908" cy:nodeId="902">
    <graphics z="0.0" y="18.547856029051218" x="280.90681138197533">
      <att name="lockedVisualProperties" type="list" cy:type="List">
        <att name="NODE_LABEL" value="" type="string" cy:type="String"/>
      </att>
    </graphics>
  </node>
  <node id="45516" label="ENSMUSG00000063229" cy:nodeId="903">
    <graphics z="0.0" y="131.51255100585786" x="177.6335865513479">
      <att name="lockedVisualProperties" type="list" cy:type="List">
        <att name="NODE_LABEL" value="" type="string" cy:type="String"/>
      </att>
    </graphics>
  </node>
  <node id="45515" label="ENSMUSG00000063524" cy:nodeId="904">
    <graphics z="0.0" y="107.64592808105317" x="150.6104341999685">
      <att name="lockedVisualProperties" type="list" cy:type="List">
        <att name="NODE_LABEL" value="" type="string" cy:type="String"/>
      </att>
    </graphics>
  </node>
  <node id="45514" label="ENSMUSG00000063531" cy:nodeId="905">
    <graphics z="0.0" y="-407.78253871582183" x="-35.785304401716076">
      <att name="lockedVisualProperties" type="list" cy:type="List">
        <att name="NODE_LABEL" value="" type="string" cy:type="String"/>
      </att>
    </graphics>
  </node>
  <node id="45513" label="ENSMUSG00000063727" cy:nodeId="906">
    <graphics z="0.0" y="-50.56091243408355" x="468.94104447523705">
      <att name="lockedVisualProperties" type="list" cy:type="List">
        <att name="NODE_LABEL" value="" type="string" cy:type="String"/>
      </att>
    </graphics>
  </node>
  <node id="45512" label="ENSMUSG00000063767" cy:nodeId="907">
    <graphics z="0.0" y="441.05239170410005" x="-6.271373127302013">
      <att name="lockedVisualProperties" type="list" cy:type="List">
        <att name="NODE_LABEL" value="" type="string" cy:type="String"/>
      </att>
    </graphics>
  </node>
  <node id="45511" label="ENSMUSG00000064090" cy:nodeId="908">
    <graphics z="0.0" y="171.06687229492036" x="232.45899262587182">
      <att name="lockedVisualProperties" type="list" cy:type="List">
        <att name="NODE_LABEL" value="" type="string" cy:type="String"/>
      </att>
    </graphics>
  </node>
  <node id="45510" label="ENSMUSG00000064202" cy:nodeId="909">
    <graphics z="0.0" y="-71.28553706787261" x="-95.67724165757545">
      <att name="lockedVisualProperties" type="list" cy:type="List">
        <att name="NODE_LABEL" value="" type="string" cy:type="String"/>
      </att>
    </graphics>
  </node>
  <node id="45509" label="ENSMUSG00000064215" cy:nodeId="910">
    <graphics z="0.0" y="26.063301738279733" x="-114.8215898021067">
      <att name="lockedVisualProperties" type="list" cy:type="List">
        <att name="NODE_LABEL" value="" type="string" cy:type="String"/>
      </att>
    </graphics>
  </node>
  <node id="45508" label="ENSMUSG00000064246" cy:nodeId="911">
    <graphics z="0.0" y="43.49441593505708" x="363.1808821217214">
      <att name="lockedVisualProperties" type="list" cy:type="List">
        <att name="NODE_LABEL" value="" type="string" cy:type="String"/>
      </att>
    </graphics>
  </node>
  <node id="45507" label="ENSMUSG00000064247" cy:nodeId="912">
    <graphics z="0.0" y="76.8113638720688" x="184.88932862440697">
      <att name="lockedVisualProperties" type="list" cy:type="List">
        <att name="NODE_LABEL" value="" type="string" cy:type="String"/>
      </att>
    </graphics>
  </node>
  <node id="45506" label="ENSMUSG00000064262" cy:nodeId="913">
    <graphics z="0.0" y="-63.201325718385306" x="-10.042552326520763">
      <att name="lockedVisualProperties" type="list" cy:type="List">
        <att name="NODE_LABEL" value="" type="string" cy:type="String"/>
      </att>
    </graphics>
  </node>
  <node id="45505" label="ENSMUSG00000065952" cy:nodeId="914">
    <graphics z="0.0" y="86.12784641601411" x="-35.6466630442942">
      <att name="lockedVisualProperties" type="list" cy:type="List">
        <att name="NODE_LABEL" value="" type="string" cy:type="String"/>
      </att>
    </graphics>
  </node>
  <node id="45504" label="ENSMUSG00000066026" cy:nodeId="915">
    <graphics z="0.0" y="-86.91870433471831" x="128.77173295179955">
      <att name="lockedVisualProperties" type="list" cy:type="List">
        <att name="NODE_LABEL" value="" type="string" cy:type="String"/>
      </att>
    </graphics>
  </node>
  <node id="45503" label="ENSMUSG00000066720" cy:nodeId="916">
    <graphics z="0.0" y="153.04673069335786" x="447.2699324146902">
      <att name="lockedVisualProperties" type="list" cy:type="List">
        <att name="NODE_LABEL" value="" type="string" cy:type="String"/>
      </att>
    </graphics>
  </node>
  <node id="45502" label="ENSMUSG00000067006" cy:nodeId="917">
    <graphics z="0.0" y="-79.58368236206206" x="-119.55001387437233">
      <att name="lockedVisualProperties" type="list" cy:type="List">
        <att name="NODE_LABEL" value="" type="string" cy:type="String"/>
      </att>
    </graphics>
  </node>
  <node id="45501" label="ENSMUSG00000067279" cy:nodeId="918">
    <graphics z="0.0" y="136.49836033202973" x="-82.72887739976295">
      <att name="lockedVisualProperties" type="list" cy:type="List">
        <att name="NODE_LABEL" value="" type="string" cy:type="String"/>
      </att>
    </graphics>
  </node>
  <node id="45500" label="ENSMUSG00000067924" cy:nodeId="919">
    <graphics z="0.0" y="-86.86076289795074" x="-421.4038346751536">
      <att name="lockedVisualProperties" type="list" cy:type="List">
        <att name="NODE_LABEL" value="" type="string" cy:type="String"/>
      </att>
    </graphics>
  </node>
  <node id="45499" label="ENSMUSG00000068196" cy:nodeId="920">
    <graphics z="0.0" y="-47.193059269410696" x="165.20397629896752">
      <att name="lockedVisualProperties" type="list" cy:type="List">
        <att name="NODE_LABEL" value="" type="string" cy:type="String"/>
      </att>
    </graphics>
  </node>
  <node id="45498" label="ENSMUSG00000068270" cy:nodeId="921">
    <graphics z="0.0" y="292.76955479003755" x="451.2034040943777">
      <att name="lockedVisualProperties" type="list" cy:type="List">
        <att name="NODE_LABEL" value="" type="string" cy:type="String"/>
      </att>
    </graphics>
  </node>
  <node id="45497" label="ENSMUSG00000068617" cy:nodeId="922">
    <graphics z="0.0" y="287.9554068408188" x="-343.3461564524973">
      <att name="lockedVisualProperties" type="list" cy:type="List">
        <att name="NODE_LABEL" value="" type="string" cy:type="String"/>
      </att>
    </graphics>
  </node>
  <node id="45496" label="ENSMUSG00000068699" cy:nodeId="923">
    <graphics z="0.0" y="97.85804050781098" x="-206.91250166734108">
      <att name="lockedVisualProperties" type="list" cy:type="List">
        <att name="NODE_LABEL" value="" type="string" cy:type="String"/>
      </att>
    </graphics>
  </node>
  <node id="45495" label="ENSMUSG00000068735" cy:nodeId="924">
    <graphics z="0.0" y="-54.21432048462066" x="308.07292618910424">
      <att name="lockedVisualProperties" type="list" cy:type="List">
        <att name="NODE_LABEL" value="" type="string" cy:type="String"/>
      </att>
    </graphics>
  </node>
  <node id="45494" label="ENSMUSG00000068742" cy:nodeId="925">
    <graphics z="0.0" y="145.31102817870942" x="-15.174205158552013">
      <att name="lockedVisualProperties" type="list" cy:type="List">
        <att name="NODE_LABEL" value="" type="string" cy:type="String"/>
      </att>
    </graphics>
  </node>
  <node id="45493" label="ENSMUSG00000069114" cy:nodeId="926">
    <graphics z="0.0" y="-151.68980342529449" x="-47.63953718980201">
      <att name="lockedVisualProperties" type="list" cy:type="List">
        <att name="NODE_LABEL" value="" type="string" cy:type="String"/>
      </att>
    </graphics>
  </node>
  <node id="45492" label="ENSMUSG00000069170" cy:nodeId="927">
    <graphics z="0.0" y="410.90004795410005" x="-95.18313155015358">
      <att name="lockedVisualProperties" type="list" cy:type="List">
        <att name="NODE_LABEL" value="" type="string" cy:type="String"/>
      </att>
    </graphics>
  </node>
  <node id="45491" label="ENSMUSG00000069255" cy:nodeId="928">
    <graphics z="0.0" y="-174.77941066406402" x="-151.3312333567942">
      <att name="lockedVisualProperties" type="list" cy:type="List">
        <att name="NODE_LABEL" value="" type="string" cy:type="String"/>
      </att>
    </graphics>
  </node>
  <node id="45490" label="ENSMUSG00000069793" cy:nodeId="929">
    <graphics z="0.0" y="-10.981429401856985" x="-363.5617326243723">
      <att name="lockedVisualProperties" type="list" cy:type="List">
        <att name="NODE_LABEL" value="" type="string" cy:type="String"/>
      </att>
    </graphics>
  </node>
  <node id="45489" label="ENSMUSG00000069814" cy:nodeId="930">
    <graphics z="0.0" y="180.18792026855317" x="-2.658397053083263">
      <att name="lockedVisualProperties" type="list" cy:type="List">
        <att name="NODE_LABEL" value="" type="string" cy:type="String"/>
      </att>
    </graphics>
  </node>
  <node id="45488" label="ENSMUSG00000070407" cy:nodeId="931">
    <graphics z="0.0" y="266.9215933642563" x="55.16816392103783">
      <att name="lockedVisualProperties" type="list" cy:type="List">
        <att name="NODE_LABEL" value="" type="string" cy:type="String"/>
      </att>
    </graphics>
  </node>
  <node id="45487" label="ENSMUSG00000070687" cy:nodeId="932">
    <graphics z="0.0" y="250.19762485839692" x="-88.21139082749733">
      <att name="lockedVisualProperties" type="list" cy:type="List">
        <att name="NODE_LABEL" value="" type="string" cy:type="String"/>
      </att>
    </graphics>
  </node>
  <node id="45486" label="ENSMUSG00000070733" cy:nodeId="933">
    <graphics z="0.0" y="-201.79950648925933" x="80.14085831801049">
      <att name="lockedVisualProperties" type="list" cy:type="List">
        <att name="NODE_LABEL" value="" type="string" cy:type="String"/>
      </att>
    </graphics>
  </node>
  <node id="45485" label="ENSMUSG00000070777" cy:nodeId="934">
    <graphics z="0.0" y="-112.9619744458023" x="-107.72915205796608">
      <att name="lockedVisualProperties" type="list" cy:type="List">
        <att name="NODE_LABEL" value="" type="string" cy:type="String"/>
      </att>
    </graphics>
  </node>
  <node id="45484" label="ENSMUSG00000070867" cy:nodeId="935">
    <graphics z="0.0" y="257.6200796923813" x="-135.68606123765358">
      <att name="lockedVisualProperties" type="list" cy:type="List">
        <att name="NODE_LABEL" value="" type="string" cy:type="String"/>
      </att>
    </graphics>
  </node>
  <node id="45483" label="ENSMUSG00000071226" cy:nodeId="936">
    <graphics z="0.0" y="240.37737339355317" x="-225.5407060130442">
      <att name="lockedVisualProperties" type="list" cy:type="List">
        <att name="NODE_LABEL" value="" type="string" cy:type="String"/>
      </att>
    </graphics>
  </node>
  <node id="45482" label="ENSMUSG00000071506" cy:nodeId="937">
    <graphics z="0.0" y="-102.99667293213042" x="250.62380662123314">
      <att name="lockedVisualProperties" type="list" cy:type="List">
        <att name="NODE_LABEL" value="" type="string" cy:type="String"/>
      </att>
    </graphics>
  </node>
  <node id="45481" label="ENSMUSG00000071537" cy:nodeId="938">
    <graphics z="0.0" y="-23.234098736268606" x="30.798130656877674">
      <att name="lockedVisualProperties" type="list" cy:type="List">
        <att name="NODE_LABEL" value="" type="string" cy:type="String"/>
      </att>
    </graphics>
  </node>
  <node id="45480" label="ENSMUSG00000071553" cy:nodeId="939">
    <graphics z="0.0" y="-84.03744060180816" x="-123.18575606187233">
      <att name="lockedVisualProperties" type="list" cy:type="List">
        <att name="NODE_LABEL" value="" type="string" cy:type="String"/>
      </att>
    </graphics>
  </node>
  <node id="45479" label="ENSMUSG00000071847" cy:nodeId="940">
    <graphics z="0.0" y="281.82460850097505" x="-125.76351485093483">
      <att name="lockedVisualProperties" type="list" cy:type="List">
        <att name="NODE_LABEL" value="" type="string" cy:type="String"/>
      </att>
    </graphics>
  </node>
  <node id="45478" label="ENSMUSG00000072115" cy:nodeId="941">
    <graphics z="0.0" y="158.2478873095688" x="189.59854951063744">
      <att name="lockedVisualProperties" type="list" cy:type="List">
        <att name="NODE_LABEL" value="" type="string" cy:type="String"/>
      </att>
    </graphics>
  </node>
  <node id="45477" label="ENSMUSG00000072214" cy:nodeId="942">
    <graphics z="0.0" y="-17.146739307862845" x="220.48437180678002">
      <att name="lockedVisualProperties" type="list" cy:type="List">
        <att name="NODE_LABEL" value="" type="string" cy:type="String"/>
      </att>
    </graphics>
  </node>
  <node id="45476" label="ENSMUSG00000072623" cy:nodeId="943">
    <graphics z="0.0" y="-282.4912484326187" x="191.25320878187767">
      <att name="lockedVisualProperties" type="list" cy:type="List">
        <att name="NODE_LABEL" value="" type="string" cy:type="String"/>
      </att>
    </graphics>
  </node>
  <node id="45475" label="ENSMUSG00000072812" cy:nodeId="944">
    <graphics z="0.0" y="-411.1472542919937" x="-203.31771406968483">
      <att name="lockedVisualProperties" type="list" cy:type="List">
        <att name="NODE_LABEL" value="" type="string" cy:type="String"/>
      </att>
    </graphics>
  </node>
  <node id="45474" label="ENSMUSG00000072946" cy:nodeId="945">
    <graphics z="0.0" y="-5.0049470104995635" x="48.33183732191674">
      <att name="lockedVisualProperties" type="list" cy:type="List">
        <att name="NODE_LABEL" value="" type="string" cy:type="String"/>
      </att>
    </graphics>
  </node>
  <node id="45473" label="ENSMUSG00000072949" cy:nodeId="946">
    <graphics z="0.0" y="300.3282400927719" x="-106.18734297593483">
      <att name="lockedVisualProperties" type="list" cy:type="List">
        <att name="NODE_LABEL" value="" type="string" cy:type="String"/>
      </att>
    </graphics>
  </node>
  <node id="45472" label="ENSMUSG00000073421" cy:nodeId="947">
    <graphics z="0.0" y="-163.57106715820464" x="248.08406510511986">
      <att name="lockedVisualProperties" type="list" cy:type="List">
        <att name="NODE_LABEL" value="" type="string" cy:type="String"/>
      </att>
    </graphics>
  </node>
  <node id="45471" label="ENSMUSG00000073889" cy:nodeId="948">
    <graphics z="0.0" y="86.37423771240083" x="-179.50072798570045">
      <att name="lockedVisualProperties" type="list" cy:type="List">
        <att name="NODE_LABEL" value="" type="string" cy:type="String"/>
      </att>
    </graphics>
  </node>
  <node id="45470" label="ENSMUSG00000073988" cy:nodeId="949">
    <graphics z="0.0" y="-103.70568782470855" x="211.6725737110769">
      <att name="lockedVisualProperties" type="list" cy:type="List">
        <att name="NODE_LABEL" value="" type="string" cy:type="String"/>
      </att>
    </graphics>
  </node>
  <node id="45469" label="ENSMUSG00000074183" cy:nodeId="950">
    <graphics z="0.0" y="318.17556064941255" x="79.44036545912377">
      <att name="lockedVisualProperties" type="list" cy:type="List">
        <att name="NODE_LABEL" value="" type="string" cy:type="String"/>
      </att>
    </graphics>
  </node>
  <node id="45468" label="ENSMUSG00000074282" cy:nodeId="951">
    <graphics z="0.0" y="218.17954319335786" x="-33.100856159528576">
      <att name="lockedVisualProperties" type="list" cy:type="List">
        <att name="NODE_LABEL" value="" type="string" cy:type="String"/>
      </att>
    </graphics>
  </node>
  <node id="45467" label="ENSMUSG00000074476" cy:nodeId="952">
    <graphics z="0.0" y="178.65967624999848" x="14.2761885182058">
      <att name="lockedVisualProperties" type="list" cy:type="List">
        <att name="NODE_LABEL" value="" type="string" cy:type="String"/>
      </att>
    </graphics>
  </node>
  <node id="45466" label="ENSMUSG00000074625" cy:nodeId="953">
    <graphics z="0.0" y="263.0333182177719" x="78.24053635756127">
      <att name="lockedVisualProperties" type="list" cy:type="List">
        <att name="NODE_LABEL" value="" type="string" cy:type="String"/>
      </att>
    </graphics>
  </node>
  <node id="45465" label="ENSMUSG00000075012" cy:nodeId="954">
    <graphics z="0.0" y="191.54369419433442" x="-111.7589677317942">
      <att name="lockedVisualProperties" type="list" cy:type="List">
        <att name="NODE_LABEL" value="" type="string" cy:type="String"/>
      </att>
    </graphics>
  </node>
  <node id="45464" label="ENSMUSG00000075122" cy:nodeId="955">
    <graphics z="0.0" y="191.84790867187348" x="116.79758134047142">
      <att name="lockedVisualProperties" type="list" cy:type="List">
        <att name="NODE_LABEL" value="" type="string" cy:type="String"/>
      </att>
    </graphics>
  </node>
  <node id="45463" label="ENSMUSG00000075701" cy:nodeId="956">
    <graphics z="0.0" y="406.09807651855317" x="216.99987473646752">
      <att name="lockedVisualProperties" type="list" cy:type="List">
        <att name="NODE_LABEL" value="" type="string" cy:type="String"/>
      </att>
    </graphics>
  </node>
  <node id="45462" label="ENSMUSG00000078185" cy:nodeId="957">
    <graphics z="0.0" y="57.09092777587739" x="163.77026620070092">
      <att name="lockedVisualProperties" type="list" cy:type="List">
        <att name="NODE_LABEL" value="" type="string" cy:type="String"/>
      </att>
    </graphics>
  </node>
  <node id="45461" label="ENSMUSG00000078202" cy:nodeId="958">
    <graphics z="0.0" y="293.7252127490219" x="-3.2280839427317005">
      <att name="lockedVisualProperties" type="list" cy:type="List">
        <att name="NODE_LABEL" value="" type="string" cy:type="String"/>
      </att>
    </graphics>
  </node>
  <node id="45460" label="ENSMUSG00000078650" cy:nodeId="959">
    <graphics z="0.0" y="-137.80056697509917" x="174.2890037552511">
      <att name="lockedVisualProperties" type="list" cy:type="List">
        <att name="NODE_LABEL" value="" type="string" cy:type="String"/>
      </att>
    </graphics>
  </node>
  <node id="45459" label="ENSMUSG00000078664" cy:nodeId="960">
    <graphics z="0.0" y="426.77407139160005" x="-155.47985396226295">
      <att name="lockedVisualProperties" type="list" cy:type="List">
        <att name="NODE_LABEL" value="" type="string" cy:type="String"/>
      </att>
    </graphics>
  </node>
  <node id="45458" label="ENSMUSG00000078851" cy:nodeId="961">
    <graphics z="0.0" y="341.4411246142563" x="-365.7574723704661">
      <att name="lockedVisualProperties" type="list" cy:type="List">
        <att name="NODE_LABEL" value="" type="string" cy:type="String"/>
      </att>
    </graphics>
  </node>
  <node id="45457" label="ENSMUSG00000078954" cy:nodeId="962">
    <graphics z="0.0" y="-104.55121547363433" x="1.137440349260487">
      <att name="lockedVisualProperties" type="list" cy:type="List">
        <att name="NODE_LABEL" value="" type="string" cy:type="String"/>
      </att>
    </graphics>
  </node>
  <node id="45456" label="ENSMUSG00000079018" cy:nodeId="963">
    <graphics z="0.0" y="137.31040256835786" x="205.0189043537771">
      <att name="lockedVisualProperties" type="list" cy:type="List">
        <att name="NODE_LABEL" value="" type="string" cy:type="String"/>
      </att>
    </graphics>
  </node>
  <node id="45455" label="ENSMUSG00000079055" cy:nodeId="964">
    <graphics z="0.0" y="395.34209507324067" x="119.57888474623314">
      <att name="lockedVisualProperties" type="list" cy:type="List">
        <att name="NODE_LABEL" value="" type="string" cy:type="String"/>
      </att>
    </graphics>
  </node>
  <node id="45454" label="ENSMUSG00000079442" cy:nodeId="965">
    <graphics z="0.0" y="168.22094028808442" x="124.80833878676049">
      <att name="lockedVisualProperties" type="list" cy:type="List">
        <att name="NODE_LABEL" value="" type="string" cy:type="String"/>
      </att>
    </graphics>
  </node>
  <node id="45453" label="ENSMUSG00000079497" cy:nodeId="966">
    <graphics z="0.0" y="77.24118107177583" x="-111.58944258530983">
      <att name="lockedVisualProperties" type="list" cy:type="List">
        <att name="NODE_LABEL" value="" type="string" cy:type="String"/>
      </att>
    </graphics>
  </node>
  <node id="45452" label="ENSMUSG00000081769" cy:nodeId="967">
    <graphics z="0.0" y="292.02996128417817" x="-36.274134968122326">
      <att name="lockedVisualProperties" type="list" cy:type="List">
        <att name="NODE_LABEL" value="" type="string" cy:type="String"/>
      </att>
    </graphics>
  </node>
  <node id="45451" label="ENSMUSG00000090100" cy:nodeId="968">
    <graphics z="0.0" y="37.01642673827973" x="-454.0813249095286">
      <att name="lockedVisualProperties" type="list" cy:type="List">
        <att name="NODE_LABEL" value="" type="string" cy:type="String"/>
      </att>
    </graphics>
  </node>
  <node id="45450" label="ENSMUSG00000090291" cy:nodeId="969">
    <graphics z="0.0" y="-202.84043056152495" x="-9.512645099958263">
      <att name="lockedVisualProperties" type="list" cy:type="List">
        <att name="NODE_LABEL" value="" type="string" cy:type="String"/>
      </att>
    </graphics>
  </node>
  <node id="45449" label="ENSMUSG00000091243" cy:nodeId="970">
    <graphics z="0.0" y="147.0069205126938" x="-83.83101973374733">
      <att name="lockedVisualProperties" type="list" cy:type="List">
        <att name="NODE_LABEL" value="" type="string" cy:type="String"/>
      </att>
    </graphics>
  </node>
  <node id="45448" label="ENSMUSG00000091387" cy:nodeId="971">
    <graphics z="0.0" y="149.87795322753755" x="259.7366072193777">
      <att name="lockedVisualProperties" type="list" cy:type="List">
        <att name="NODE_LABEL" value="" type="string" cy:type="String"/>
      </att>
    </graphics>
  </node>
  <node id="45447" label="ENSMUSG00000094091" cy:nodeId="972">
    <graphics z="0.0" y="87.09793918945161" x="-59.57383284409889">
      <att name="lockedVisualProperties" type="list" cy:type="List">
        <att name="NODE_LABEL" value="" type="string" cy:type="String"/>
      </att>
    </graphics>
  </node>
  <node id="45446" label="ENSMUSG00000094626" cy:nodeId="973">
    <graphics z="0.0" y="324.69509189941255" x="-45.88315901597389">
      <att name="lockedVisualProperties" type="list" cy:type="List">
        <att name="NODE_LABEL" value="" type="string" cy:type="String"/>
      </att>
    </graphics>
  </node>
  <node id="45445" label="ENSMUSG00000094928" cy:nodeId="974">
    <graphics z="0.0" y="81.02110355712739" x="-239.41903242905983">
      <att name="lockedVisualProperties" type="list" cy:type="List">
        <att name="NODE_LABEL" value="" type="string" cy:type="String"/>
      </att>
    </graphics>
  </node>
  <node id="45444" label="ENSMUSG00000095026" cy:nodeId="975">
    <graphics z="0.0" y="-186.7710335888687" x="-341.2674211009348">
      <att name="lockedVisualProperties" type="list" cy:type="List">
        <att name="NODE_LABEL" value="" type="string" cy:type="String"/>
      </att>
    </graphics>
  </node>
  <node id="45443" label="ENSMUSG00000095105" cy:nodeId="976">
    <graphics z="0.0" y="231.51116245605317" x="-80.78780684312233">
      <att name="lockedVisualProperties" type="list" cy:type="List">
        <att name="NODE_LABEL" value="" type="string" cy:type="String"/>
      </att>
    </graphics>
  </node>
  <node id="45442" label="ENSMUSG00000096472" cy:nodeId="977">
    <graphics z="0.0" y="126.28226536132661" x="273.9801908985769">
      <att name="lockedVisualProperties" type="list" cy:type="List">
        <att name="NODE_LABEL" value="" type="string" cy:type="String"/>
      </att>
    </graphics>
  </node>
  <node id="45441" label="ENSMUSG00000096847" cy:nodeId="978">
    <graphics z="0.0" y="171.4890524707016" x="279.2369352833425">
      <att name="lockedVisualProperties" type="list" cy:type="List">
        <att name="NODE_LABEL" value="" type="string" cy:type="String"/>
      </att>
    </graphics>
  </node>
  <node id="45440" label="ENSMUSG00000098132" cy:nodeId="979">
    <graphics z="0.0" y="-345.2902901806656" x="27.056858684221424">
      <att name="lockedVisualProperties" type="list" cy:type="List">
        <att name="NODE_LABEL" value="" type="string" cy:type="String"/>
      </att>
    </graphics>
  </node>
  <node id="45439" label="ENSMUSG00000098557" cy:nodeId="980">
    <graphics z="0.0" y="53.57309788085786" x="183.76291527907006">
      <att name="lockedVisualProperties" type="list" cy:type="List">
        <att name="NODE_LABEL" value="" type="string" cy:type="String"/>
      </att>
    </graphics>
  </node>
  <node id="45438" label="ENSMUSG00000098678" cy:nodeId="981">
    <graphics z="0.0" y="238.36077183105317" x="-380.9242814524973">
      <att name="lockedVisualProperties" type="list" cy:type="List">
        <att name="NODE_LABEL" value="" type="string" cy:type="String"/>
      </att>
    </graphics>
  </node>
  <node id="45437" label="ENSMUSG00000099689" cy:nodeId="982">
    <graphics z="0.0" y="352.27568882324067" x="-270.67187056382545">
      <att name="lockedVisualProperties" type="list" cy:type="List">
        <att name="NODE_LABEL" value="" type="string" cy:type="String"/>
      </att>
    </graphics>
  </node>
  <node id="45436" label="ENSMUSG00000108348" cy:nodeId="983">
    <graphics z="0.0" y="-124.63849574707183" x="291.15362229506127">
      <att name="lockedVisualProperties" type="list" cy:type="List">
        <att name="NODE_LABEL" value="" type="string" cy:type="String"/>
      </att>
    </graphics>
  </node>
  <node id="45435" label="ENSMUSG00000110086" cy:nodeId="984">
    <graphics z="0.0" y="232.5172964892563" x="-183.36477217515358">
      <att name="lockedVisualProperties" type="list" cy:type="List">
        <att name="NODE_LABEL" value="" type="string" cy:type="String"/>
      </att>
    </graphics>
  </node>
  <node id="45434" label="ENSMUSG00000110266" cy:nodeId="985">
    <graphics z="0.0" y="215.23796909667817" x="33.82005753676049">
      <att name="lockedVisualProperties" type="list" cy:type="List">
        <att name="NODE_LABEL" value="" type="string" cy:type="String"/>
      </att>
    </graphics>
  </node>
  <node id="45433" label="ENSMUSG00000000942" cy:nodeId="986">
    <graphics z="0.0" y="771.974022563475" x="420.97107377211205">
      <att name="lockedVisualProperties" type="list" cy:type="List">
        <att name="NODE_LABEL" value="" type="string" cy:type="String"/>
      </att>
    </graphics>
  </node>
  <node id="45432" label="ENSMUSG00000001517" cy:nodeId="987">
    <graphics z="0.0" y="5.510674174803171" x="-297.8715165599192">
      <att name="lockedVisualProperties" type="list" cy:type="List">
        <att name="NODE_LABEL" value="" type="string" cy:type="String"/>
      </att>
    </graphics>
  </node>
  <node id="45431" label="ENSMUSG00000001566" cy:nodeId="988">
    <graphics z="0.0" y="-268.207877460939" x="76.16725602308861">
      <att name="lockedVisualProperties" type="list" cy:type="List">
        <att name="NODE_LABEL" value="" type="string" cy:type="String"/>
      </att>
    </graphics>
  </node>
  <node id="45430" label="ENSMUSG00000002108" cy:nodeId="989">
    <graphics z="0.0" y="-474.46811610839995" x="-77.8363603099192">
      <att name="lockedVisualProperties" type="list" cy:type="List">
        <att name="NODE_LABEL" value="" type="string" cy:type="String"/>
      </att>
    </graphics>
  </node>
  <node id="45429" label="ENSMUSG00000003123" cy:nodeId="990">
    <graphics z="0.0" y="-532.2230904736343" x="233.27185120741478">
      <att name="lockedVisualProperties" type="list" cy:type="List">
        <att name="NODE_LABEL" value="" type="string" cy:type="String"/>
      </att>
    </graphics>
  </node>
  <node id="45428" label="ENSMUSG00000005373" cy:nodeId="991">
    <graphics z="0.0" y="-133.92004329345855" x="-176.8013261302317">
      <att name="lockedVisualProperties" type="list" cy:type="List">
        <att name="NODE_LABEL" value="" type="string" cy:type="String"/>
      </att>
    </graphics>
  </node>
  <node id="45427" label="ENSMUSG00000021125" cy:nodeId="992">
    <graphics z="0.0" y="-248.71617824218902" x="225.85979905287377">
      <att name="lockedVisualProperties" type="list" cy:type="List">
        <att name="NODE_LABEL" value="" type="string" cy:type="String"/>
      </att>
    </graphics>
  </node>
  <node id="45426" label="ENSMUSG00000024030" cy:nodeId="993">
    <graphics z="0.0" y="216.30988376952973" x="81.95741715590111">
      <att name="lockedVisualProperties" type="list" cy:type="List">
        <att name="NODE_LABEL" value="" type="string" cy:type="String"/>
      </att>
    </graphics>
  </node>
  <node id="45425" label="ENSMUSG00000002265" cy:nodeId="994">
    <graphics z="0.0" y="-192.69611293457183" x="123.65037980238549">
      <att name="lockedVisualProperties" type="list" cy:type="List">
        <att name="NODE_LABEL" value="" type="string" cy:type="String"/>
      </att>
    </graphics>
  </node>
  <node id="45424" label="ENSMUSG00000002266" cy:nodeId="995">
    <graphics z="0.0" y="-355.73276454589995" x="138.9585157887136">
      <att name="lockedVisualProperties" type="list" cy:type="List">
        <att name="NODE_LABEL" value="" type="string" cy:type="String"/>
      </att>
    </graphics>
  </node>
  <node id="45423" label="ENSMUSG00000004113" cy:nodeId="996">
    <graphics z="0.0" y="-219.81751186035308" x="-89.31850752671608">
      <att name="lockedVisualProperties" type="list" cy:type="List">
        <att name="NODE_LABEL" value="" type="string" cy:type="String"/>
      </att>
    </graphics>
  </node>
  <node id="45422" label="ENSMUSG00000005268" cy:nodeId="997">
    <graphics z="0.0" y="151.3440329394516" x="-7.011149738630138">
      <att name="lockedVisualProperties" type="list" cy:type="List">
        <att name="NODE_LABEL" value="" type="string" cy:type="String"/>
      </att>
    </graphics>
  </node>
  <node id="45421" label="ENSMUSG00000005355" cy:nodeId="998">
    <graphics z="0.0" y="40.599693950193796" x="187.99136033217064">
      <att name="lockedVisualProperties" type="list" cy:type="List">
        <att name="NODE_LABEL" value="" type="string" cy:type="String"/>
      </att>
    </graphics>
  </node>
  <node id="45420" label="ENSMUSG00000005949" cy:nodeId="999">
    <graphics z="0.0" y="-94.29612666748199" x="-398.6173356517161">
      <att name="lockedVisualProperties" type="list" cy:type="List">
        <att name="NODE_LABEL" value="" type="string" cy:type="String"/>
      </att>
    </graphics>
  </node>
  <node id="45419" label="ENSMUSG00000005951" cy:nodeId="1000">
    <graphics z="0.0" y="559.17885654785" x="-126.70009932359108">
      <att name="lockedVisualProperties" type="list" cy:type="List">
        <att name="NODE_LABEL" value="" type="string" cy:type="String"/>
      </att>
    </graphics>
  </node>
  <node id="45418" label="ENSMUSG00000006494" cy:nodeId="1001">
    <graphics z="0.0" y="-20.331007305604544" x="-219.2304032786692">
      <att name="lockedVisualProperties" type="list" cy:type="List">
        <att name="NODE_LABEL" value="" type="string" cy:type="String"/>
      </att>
    </graphics>
  </node>
  <node id="45417" label="ENSMUSG00000010505" cy:nodeId="1002">
    <graphics z="0.0" y="-19.83341533325347" x="154.97491707960717">
      <att name="lockedVisualProperties" type="list" cy:type="List">
        <att name="NODE_LABEL" value="" type="string" cy:type="String"/>
      </att>
    </graphics>
  </node>
  <node id="45416" label="ENSMUSG00000014164" cy:nodeId="1003">
    <graphics z="0.0" y="224.1082388720688" x="-33.18140730698951">
      <att name="lockedVisualProperties" type="list" cy:type="List">
        <att name="NODE_LABEL" value="" type="string" cy:type="String"/>
      </att>
    </graphics>
  </node>
  <node id="45415" label="ENSMUSG00000017652" cy:nodeId="1004">
    <graphics z="0.0" y="-71.59421092651519" x="92.33347764174096">
      <att name="lockedVisualProperties" type="list" cy:type="List">
        <att name="NODE_LABEL" value="" type="string" cy:type="String"/>
      </att>
    </graphics>
  </node>
  <node id="45414" label="ENSMUSG00000019761" cy:nodeId="1005">
    <graphics z="0.0" y="421.8899771533188" x="188.61794152418724">
      <att name="lockedVisualProperties" type="list" cy:type="List">
        <att name="NODE_LABEL" value="" type="string" cy:type="String"/>
      </att>
    </graphics>
  </node>
  <node id="45413" label="ENSMUSG00000019796" cy:nodeId="1006">
    <graphics z="0.0" y="96.42249363281098" x="-49.025172565778576">
      <att name="lockedVisualProperties" type="list" cy:type="List">
        <att name="NODE_LABEL" value="" type="string" cy:type="String"/>
      </att>
    </graphics>
  </node>
  <node id="45412" label="ENSMUSG00000019831" cy:nodeId="1007">
    <graphics z="0.0" y="235.3638541064438" x="232.20155396620385">
      <att name="lockedVisualProperties" type="list" cy:type="List">
        <att name="NODE_LABEL" value="" type="string" cy:type="String"/>
      </att>
    </graphics>
  </node>
  <node id="45411" label="ENSMUSG00000020808" cy:nodeId="1008">
    <graphics z="0.0" y="126.12636631347505" x="340.34978165785424">
      <att name="lockedVisualProperties" type="list" cy:type="List">
        <att name="NODE_LABEL" value="" type="string" cy:type="String"/>
      </att>
    </graphics>
  </node>
  <node id="45410" label="ENSMUSG00000021337" cy:nodeId="1009">
    <graphics z="0.0" y="61.71955173827973" x="170.4311253086721">
      <att name="lockedVisualProperties" type="list" cy:type="List">
        <att name="NODE_LABEL" value="" type="string" cy:type="String"/>
      </att>
    </graphics>
  </node>
  <node id="45409" label="ENSMUSG00000022014" cy:nodeId="1010">
    <graphics z="0.0" y="253.07888096191255" x="-175.71767744859108">
      <att name="lockedVisualProperties" type="list" cy:type="List">
        <att name="NODE_LABEL" value="" type="string" cy:type="String"/>
      </att>
    </graphics>
  </node>
  <node id="45408" label="ENSMUSG00000022054" cy:nodeId="1011">
    <graphics z="0.0" y="-481.1550362744156" x="73.15987076918236">
      <att name="lockedVisualProperties" type="list" cy:type="List">
        <att name="NODE_LABEL" value="" type="string" cy:type="String"/>
      </att>
    </graphics>
  </node>
  <node id="45407" label="ENSMUSG00000022687" cy:nodeId="1012">
    <graphics z="0.0" y="364.37871616699067" x="-271.6967423899973">
      <att name="lockedVisualProperties" type="list" cy:type="List">
        <att name="NODE_LABEL" value="" type="string" cy:type="String"/>
      </att>
    </graphics>
  </node>
  <node id="45406" label="ENSMUSG00000022769" cy:nodeId="1013">
    <graphics z="0.0" y="53.01005619384614" x="-114.76430830796608">
      <att name="lockedVisualProperties" type="list" cy:type="List">
        <att name="NODE_LABEL" value="" type="string" cy:type="String"/>
      </att>
    </graphics>
  </node>
  <node id="45405" label="ENSMUSG00000023224" cy:nodeId="1014">
    <graphics z="0.0" y="96.50263279296723" x="-213.67171797593483">
      <att name="lockedVisualProperties" type="list" cy:type="List">
        <att name="NODE_LABEL" value="" type="string" cy:type="String"/>
      </att>
    </graphics>
  </node>
  <node id="45404" label="ENSMUSG00000024033" cy:nodeId="1015">
    <graphics z="0.0" y="41.77102726318208" x="227.4167906300222">
      <att name="lockedVisualProperties" type="list" cy:type="List">
        <att name="NODE_LABEL" value="" type="string" cy:type="String"/>
      </att>
    </graphics>
  </node>
  <node id="45403" label="ENSMUSG00000025027" cy:nodeId="1016">
    <graphics z="0.0" y="97.98278110839692" x="-97.04958662827858">
      <att name="lockedVisualProperties" type="list" cy:type="List">
        <att name="NODE_LABEL" value="" type="string" cy:type="String"/>
      </att>
    </graphics>
  </node>
  <node id="45402" label="ENSMUSG00000025091" cy:nodeId="1017">
    <graphics z="0.0" y="320.73293369628755" x="162.53682961622826">
      <att name="lockedVisualProperties" type="list" cy:type="List">
        <att name="NODE_LABEL" value="" type="string" cy:type="String"/>
      </att>
    </graphics>
  </node>
  <node id="45401" label="ENSMUSG00000025551" cy:nodeId="1018">
    <graphics z="0.0" y="-284.67719203613433" x="81.18657365004174">
      <att name="lockedVisualProperties" type="list" cy:type="List">
        <att name="NODE_LABEL" value="" type="string" cy:type="String"/>
      </att>
    </graphics>
  </node>
  <node id="45400" label="ENSMUSG00000026335" cy:nodeId="1019">
    <graphics z="0.0" y="-41.182081524354544" x="10.91077103773705">
      <att name="lockedVisualProperties" type="list" cy:type="List">
        <att name="NODE_LABEL" value="" type="string" cy:type="String"/>
      </att>
    </graphics>
  </node>
  <node id="45399" label="ENSMUSG00000026443" cy:nodeId="1020">
    <graphics z="0.0" y="144.6775290332016" x="-72.11928877671608">
      <att name="lockedVisualProperties" type="list" cy:type="List">
        <att name="NODE_LABEL" value="" type="string" cy:type="String"/>
      </att>
    </graphics>
  </node>
  <node id="45398" label="ENSMUSG00000026692" cy:nodeId="1021">
    <graphics z="0.0" y="280.03176182128755" x="74.2773863331472">
      <att name="lockedVisualProperties" type="list" cy:type="List">
        <att name="NODE_LABEL" value="" type="string" cy:type="String"/>
      </att>
    </graphics>
  </node>
  <node id="45397" label="ENSMUSG00000026764" cy:nodeId="1022">
    <graphics z="0.0" y="141.49726169921723" x="-20.2816728099192">
      <att name="lockedVisualProperties" type="list" cy:type="List">
        <att name="NODE_LABEL" value="" type="string" cy:type="String"/>
      </att>
    </graphics>
  </node>
  <node id="45396" label="ENSMUSG00000026961" cy:nodeId="1023">
    <graphics z="0.0" y="464.17177646972505" x="-213.19924483140358">
      <att name="lockedVisualProperties" type="list" cy:type="List">
        <att name="NODE_LABEL" value="" type="string" cy:type="String"/>
      </att>
    </graphics>
  </node>
  <node id="45395" label="ENSMUSG00000027254" cy:nodeId="1024">
    <graphics z="0.0" y="-285.9037240185562" x="62.09412827650658">
      <att name="lockedVisualProperties" type="list" cy:type="List">
        <att name="NODE_LABEL" value="" type="string" cy:type="String"/>
      </att>
    </graphics>
  </node>
  <node id="45394" label="ENSMUSG00000027273" cy:nodeId="1025">
    <graphics z="0.0" y="141.81415623046723" x="-220.19600996812233">
      <att name="lockedVisualProperties" type="list" cy:type="List">
        <att name="NODE_LABEL" value="" type="string" cy:type="String"/>
      </att>
    </graphics>
  </node>
  <node id="45393" label="ENSMUSG00000027952" cy:nodeId="1026">
    <graphics z="0.0" y="151.9128043017563" x="276.735218669573">
      <att name="lockedVisualProperties" type="list" cy:type="List">
        <att name="NODE_LABEL" value="" type="string" cy:type="String"/>
      </att>
    </graphics>
  </node>
  <node id="45392" label="ENSMUSG00000030406" cy:nodeId="1027">
    <graphics z="0.0" y="436.8090750537094" x="-99.42800459702858">
      <att name="lockedVisualProperties" type="list" cy:type="List">
        <att name="NODE_LABEL" value="" type="string" cy:type="String"/>
      </att>
    </graphics>
  </node>
  <node id="45391" label="ENSMUSG00000031760" cy:nodeId="1028">
    <graphics z="0.0" y="-135.26087123535308" x="-106.3685868724192">
      <att name="lockedVisualProperties" type="list" cy:type="List">
        <att name="NODE_LABEL" value="" type="string" cy:type="String"/>
      </att>
    </graphics>
  </node>
  <node id="45390" label="ENSMUSG00000031791" cy:nodeId="1029">
    <graphics z="0.0" y="468.6820914111313" x="66.75673356215111">
      <att name="lockedVisualProperties" type="list" cy:type="List">
        <att name="NODE_LABEL" value="" type="string" cy:type="String"/>
      </att>
    </graphics>
  </node>
  <node id="45389" label="ENSMUSG00000032297" cy:nodeId="1030">
    <graphics z="0.0" y="-179.2063820996109" x="-75.4916337474192">
      <att name="lockedVisualProperties" type="list" cy:type="List">
        <att name="NODE_LABEL" value="" type="string" cy:type="String"/>
      </att>
    </graphics>
  </node>
  <node id="45388" label="ENSMUSG00000033061" cy:nodeId="1031">
    <graphics z="0.0" y="-31.21712237976226" x="213.28748765150658">
      <att name="lockedVisualProperties" type="list" cy:type="List">
        <att name="NODE_LABEL" value="" type="string" cy:type="String"/>
      </att>
    </graphics>
  </node>
  <node id="45387" label="ENSMUSG00000033307" cy:nodeId="1032">
    <graphics z="0.0" y="70.5401007495102" x="372.4225508228933">
      <att name="lockedVisualProperties" type="list" cy:type="List">
        <att name="NODE_LABEL" value="" type="string" cy:type="String"/>
      </att>
    </graphics>
  </node>
  <node id="45386" label="ENSMUSG00000034379" cy:nodeId="1033">
    <graphics z="0.0" y="275.96575229980317" x="154.73031487623803">
      <att name="lockedVisualProperties" type="list" cy:type="List">
        <att name="NODE_LABEL" value="" type="string" cy:type="String"/>
      </att>
    </graphics>
  </node>
  <node id="45385" label="ENSMUSG00000034579" cy:nodeId="1034">
    <graphics z="0.0" y="188.43792026855317" x="107.17392411390892">
      <att name="lockedVisualProperties" type="list" cy:type="List">
        <att name="NODE_LABEL" value="" type="string" cy:type="String"/>
      </att>
    </graphics>
  </node>
  <node id="45384" label="ENSMUSG00000034774" cy:nodeId="1035">
    <graphics z="0.0" y="112.10735386230317" x="324.79085221449486">
      <att name="lockedVisualProperties" type="list" cy:type="List">
        <att name="NODE_LABEL" value="" type="string" cy:type="String"/>
      </att>
    </graphics>
  </node>
  <node id="45383" label="ENSMUSG00000034858" cy:nodeId="1036">
    <graphics z="0.0" y="-18.583052937013235" x="-123.9522050364817">
      <att name="lockedVisualProperties" type="list" cy:type="List">
        <att name="NODE_LABEL" value="" type="string" cy:type="String"/>
      </att>
    </graphics>
  </node>
  <node id="45382" label="ENSMUSG00000035226" cy:nodeId="1037">
    <graphics z="0.0" y="286.4497000537094" x="29.341465617815174">
      <att name="lockedVisualProperties" type="list" cy:type="List">
        <att name="NODE_LABEL" value="" type="string" cy:type="String"/>
      </att>
    </graphics>
  </node>
  <node id="45381" label="ENSMUSG00000035299" cy:nodeId="1038">
    <graphics z="0.0" y="88.73685520507661" x="-158.04174361070045">
      <att name="lockedVisualProperties" type="list" cy:type="List">
        <att name="NODE_LABEL" value="" type="string" cy:type="String"/>
      </att>
    </graphics>
  </node>
  <node id="45380" label="ENSMUSG00000035509" cy:nodeId="1039">
    <graphics z="0.0" y="-19.947223011476126" x="-100.69848189195045">
      <att name="lockedVisualProperties" type="list" cy:type="List">
        <att name="NODE_LABEL" value="" type="string" cy:type="String"/>
      </att>
    </graphics>
  </node>
  <node id="45379" label="ENSMUSG00000035606" cy:nodeId="1040">
    <graphics z="0.0" y="234.0913931689438" x="176.9375940815603">
      <att name="lockedVisualProperties" type="list" cy:type="List">
        <att name="NODE_LABEL" value="" type="string" cy:type="String"/>
      </att>
    </graphics>
  </node>
  <node id="45378" label="ENSMUSG00000036913" cy:nodeId="1041">
    <graphics z="0.0" y="-229.81891566894683" x="-102.64828047593483">
      <att name="lockedVisualProperties" type="list" cy:type="List">
        <att name="NODE_LABEL" value="" type="string" cy:type="String"/>
      </att>
    </graphics>
  </node>
  <node id="45377" label="ENSMUSG00000037159" cy:nodeId="1042">
    <graphics z="0.0" y="-225.3710549511734" x="378.7588240162527">
      <att name="lockedVisualProperties" type="list" cy:type="List">
        <att name="NODE_LABEL" value="" type="string" cy:type="String"/>
      </att>
    </graphics>
  </node>
  <node id="45376" label="ENSMUSG00000037636" cy:nodeId="1043">
    <graphics z="0.0" y="21.849091228025827" x="300.87754502455346">
      <att name="lockedVisualProperties" type="list" cy:type="List">
        <att name="NODE_LABEL" value="" type="string" cy:type="String"/>
      </att>
    </graphics>
  </node>
  <node id="45375" label="ENSMUSG00000038255" cy:nodeId="1044">
    <graphics z="0.0" y="67.4688345751938" x="15.5104414478933">
      <att name="lockedVisualProperties" type="list" cy:type="List">
        <att name="NODE_LABEL" value="" type="string" cy:type="String"/>
      </att>
    </graphics>
  </node>
  <node id="45374" label="ENSMUSG00000039005" cy:nodeId="1045">
    <graphics z="0.0" y="102.72281711913911" x="-81.66897139390358">
      <att name="lockedVisualProperties" type="list" cy:type="List">
        <att name="NODE_LABEL" value="" type="string" cy:type="String"/>
      </att>
    </graphics>
  </node>
  <node id="45373" label="ENSMUSG00000039372" cy:nodeId="1046">
    <graphics z="0.0" y="-182.59738856933745" x="-110.32851729234108">
      <att name="lockedVisualProperties" type="list" cy:type="List">
        <att name="NODE_LABEL" value="" type="string" cy:type="String"/>
      </att>
    </graphics>
  </node>
  <node id="45372" label="ENSMUSG00000039851" cy:nodeId="1047">
    <graphics z="0.0" y="107.0721060595688" x="146.5659948841726">
      <att name="lockedVisualProperties" type="list" cy:type="List">
        <att name="NODE_LABEL" value="" type="string" cy:type="String"/>
      </att>
    </graphics>
  </node>
  <node id="45371" label="ENSMUSG00000039934" cy:nodeId="1048">
    <graphics z="0.0" y="-105.81377345703277" x="-69.16482100327858">
      <att name="lockedVisualProperties" type="list" cy:type="List">
        <att name="NODE_LABEL" value="" type="string" cy:type="String"/>
      </att>
    </graphics>
  </node>
  <node id="45370" label="ENSMUSG00000042647" cy:nodeId="1049">
    <graphics z="0.0" y="238.64418857910005" x="-72.5541337474192">
      <att name="lockedVisualProperties" type="list" cy:type="List">
        <att name="NODE_LABEL" value="" type="string" cy:type="String"/>
      </att>
    </graphics>
  </node>
  <node id="45369" label="ENSMUSG00000043004" cy:nodeId="1050">
    <graphics z="0.0" y="-53.623219791871634" x="219.83047166029564">
      <att name="lockedVisualProperties" type="list" cy:type="List">
        <att name="NODE_LABEL" value="" type="string" cy:type="String"/>
      </att>
    </graphics>
  </node>
  <node id="45368" label="ENSMUSG00000043639" cy:nodeId="1051">
    <graphics z="0.0" y="-116.97667628906402" x="-243.45663008530983">
      <att name="lockedVisualProperties" type="list" cy:type="List">
        <att name="NODE_LABEL" value="" type="string" cy:type="String"/>
      </att>
    </graphics>
  </node>
  <node id="45367" label="ENSMUSG00000044367" cy:nodeId="1052">
    <graphics z="0.0" y="214.57306736327973" x="300.0354658619558">
      <att name="lockedVisualProperties" type="list" cy:type="List">
        <att name="NODE_LABEL" value="" type="string" cy:type="String"/>
      </att>
    </graphics>
  </node>
  <node id="45366" label="ENSMUSG00000045838" cy:nodeId="1053">
    <graphics z="0.0" y="144.1841666064438" x="95.25960221449486">
      <att name="lockedVisualProperties" type="list" cy:type="List">
        <att name="NODE_LABEL" value="" type="string" cy:type="String"/>
      </att>
    </graphics>
  </node>
  <node id="45365" label="ENSMUSG00000048572" cy:nodeId="1054">
    <graphics z="0.0" y="266.6420828662094" x="-32.952296589216076">
      <att name="lockedVisualProperties" type="list" cy:type="List">
        <att name="NODE_LABEL" value="" type="string" cy:type="String"/>
      </att>
    </graphics>
  </node>
  <node id="45364" label="ENSMUSG00000049148" cy:nodeId="1055">
    <graphics z="0.0" y="-0.27088863037261035" x="325.65083756605736">
      <att name="lockedVisualProperties" type="list" cy:type="List">
        <att name="NODE_LABEL" value="" type="string" cy:type="String"/>
      </att>
    </graphics>
  </node>
  <node id="45363" label="ENSMUSG00000050296" cy:nodeId="1056">
    <graphics z="0.0" y="151.12314670898286" x="278.4911848560964">
      <att name="lockedVisualProperties" type="list" cy:type="List">
        <att name="NODE_LABEL" value="" type="string" cy:type="String"/>
      </att>
    </graphics>
  </node>
  <node id="45362" label="ENSMUSG00000051166" cy:nodeId="1057">
    <graphics z="0.0" y="-120.19230586670074" x="-204.17064986070045">
      <att name="lockedVisualProperties" type="list" cy:type="List">
        <att name="NODE_LABEL" value="" type="string" cy:type="String"/>
      </att>
    </graphics>
  </node>
  <node id="45361" label="ENSMUSG00000051177" cy:nodeId="1058">
    <graphics z="0.0" y="348.82570713378755" x="144.13856568495385">
      <att name="lockedVisualProperties" type="list" cy:type="List">
        <att name="NODE_LABEL" value="" type="string" cy:type="String"/>
      </att>
    </graphics>
  </node>
  <node id="45360" label="ENSMUSG00000053216" cy:nodeId="1059">
    <graphics z="0.0" y="-0.4082749523940947" x="-234.94777998765358">
      <att name="lockedVisualProperties" type="list" cy:type="List">
        <att name="NODE_LABEL" value="" type="string" cy:type="String"/>
      </att>
    </graphics>
  </node>
  <node id="45359" label="ENSMUSG00000058297" cy:nodeId="1060">
    <graphics z="0.0" y="-61.106768909913626" x="-12.67516646226295">
      <att name="lockedVisualProperties" type="list" cy:type="List">
        <att name="NODE_LABEL" value="" type="string" cy:type="String"/>
      </att>
    </graphics>
  </node>
  <node id="45358" label="ENSMUSG00000058624" cy:nodeId="1061">
    <graphics z="0.0" y="-89.07731563232574" x="218.30524506727807">
      <att name="lockedVisualProperties" type="list" cy:type="List">
        <att name="NODE_LABEL" value="" type="string" cy:type="String"/>
      </att>
    </graphics>
  </node>
  <node id="45357" label="ENSMUSG00000059742" cy:nodeId="1062">
    <graphics z="0.0" y="327.83477085449067" x="-5.1619218333567005">
      <att name="lockedVisualProperties" type="list" cy:type="List">
        <att name="NODE_LABEL" value="" type="string" cy:type="String"/>
      </att>
    </graphics>
  </node>
  <node id="45356" label="ENSMUSG00000061111" cy:nodeId="1063">
    <graphics z="0.0" y="218.30300205566255" x="213.54094376722924">
      <att name="lockedVisualProperties" type="list" cy:type="List">
        <att name="NODE_LABEL" value="" type="string" cy:type="String"/>
      </att>
    </graphics>
  </node>
  <node id="45355" label="ENSMUSG00000063439" cy:nodeId="1064">
    <graphics z="0.0" y="-165.42034083984527" x="-100.52453169663795">
      <att name="lockedVisualProperties" type="list" cy:type="List">
        <att name="NODE_LABEL" value="" type="string" cy:type="String"/>
      </att>
    </graphics>
  </node>
  <node id="45354" label="ENSMUSG00000063450" cy:nodeId="1065">
    <graphics z="0.0" y="-95.46373683593902" x="-243.3207353099192">
      <att name="lockedVisualProperties" type="list" cy:type="List">
        <att name="NODE_LABEL" value="" type="string" cy:type="String"/>
      </att>
    </graphics>
  </node>
  <node id="45353" label="ENSMUSG00000066952" cy:nodeId="1066">
    <graphics z="0.0" y="75.05312412597505" x="-166.11819014390358">
      <att name="lockedVisualProperties" type="list" cy:type="List">
        <att name="NODE_LABEL" value="" type="string" cy:type="String"/>
      </att>
    </graphics>
  </node>
  <node id="45352" label="ENSMUSG00000067925" cy:nodeId="1067">
    <graphics z="0.0" y="-274.8948128857437" x="209.85434403578392">
      <att name="lockedVisualProperties" type="list" cy:type="List">
        <att name="NODE_LABEL" value="" type="string" cy:type="String"/>
      </att>
    </graphics>
  </node>
  <node id="45351" label="ENSMUSG00000069622" cy:nodeId="1068">
    <graphics z="0.0" y="309.27922886230317" x="-12.854884479841076">
      <att name="lockedVisualProperties" type="list" cy:type="List">
        <att name="NODE_LABEL" value="" type="string" cy:type="String"/>
      </att>
    </graphics>
  </node>
  <node id="45350" label="ENSMUSG00000070287" cy:nodeId="1069">
    <graphics z="0.0" y="277.7055594287094" x="50.25398698011986">
      <att name="lockedVisualProperties" type="list" cy:type="List">
        <att name="NODE_LABEL" value="" type="string" cy:type="String"/>
      </att>
    </graphics>
  </node>
  <node id="45349" label="ENSMUSG00000070802" cy:nodeId="1070">
    <graphics z="0.0" y="149.19457310058442" x="-243.02538618882545">
      <att name="lockedVisualProperties" type="list" cy:type="List">
        <att name="NODE_LABEL" value="" type="string" cy:type="String"/>
      </att>
    </graphics>
  </node>
  <node id="45348" label="ENSMUSG00000079037" cy:nodeId="1071">
    <graphics z="0.0" y="20.813057597654733" x="84.68086686293236">
      <att name="lockedVisualProperties" type="list" cy:type="List">
        <att name="NODE_LABEL" value="" type="string" cy:type="String"/>
      </att>
    </graphics>
  </node>
  <node id="45347" label="ENSMUSG00000094651" cy:nodeId="1072">
    <graphics z="0.0" y="127.4605337939438" x="-360.2629044993723">
      <att name="lockedVisualProperties" type="list" cy:type="List">
        <att name="NODE_LABEL" value="" type="string" cy:type="String"/>
      </att>
    </graphics>
  </node>
  <node id="45346" label="ENSMUSG00000002885" cy:nodeId="1073">
    <graphics z="0.0" y="41.12846439697114" x="-141.96364912827858">
      <att name="lockedVisualProperties" type="list" cy:type="List">
        <att name="NODE_LABEL" value="" type="string" cy:type="String"/>
      </att>
    </graphics>
  </node>
  <node id="45345" label="ENSMUSG00000004151" cy:nodeId="1074">
    <graphics z="0.0" y="240.36977451660005" x="-96.49044356187233">
      <att name="lockedVisualProperties" type="list" cy:type="List">
        <att name="NODE_LABEL" value="" type="string" cy:type="String"/>
      </att>
    </graphics>
  </node>
  <node id="45344" label="ENSMUSG00000006800" cy:nodeId="1075">
    <graphics z="0.0" y="-11.967879597169485" x="96.99445786635033">
      <att name="lockedVisualProperties" type="list" cy:type="List">
        <att name="NODE_LABEL" value="" type="string" cy:type="String"/>
      </att>
    </graphics>
  </node>
  <node id="45343" label="ENSMUSG00000015745" cy:nodeId="1076">
    <graphics z="0.0" y="-99.36858302734527" x="65.07211747328392">
      <att name="lockedVisualProperties" type="list" cy:type="List">
        <att name="NODE_LABEL" value="" type="string" cy:type="String"/>
      </att>
    </graphics>
  </node>
  <node id="45342" label="ENSMUSG00000018865" cy:nodeId="1077">
    <graphics z="0.0" y="-158.2556298413101" x="126.87596573988549">
      <att name="lockedVisualProperties" type="list" cy:type="List">
        <att name="NODE_LABEL" value="" type="string" cy:type="String"/>
      </att>
    </graphics>
  </node>
  <node id="45341" label="ENSMUSG00000020581" cy:nodeId="1078">
    <graphics z="0.0" y="-122.99098903320464" x="383.6822706715261">
      <att name="lockedVisualProperties" type="list" cy:type="List">
        <att name="NODE_LABEL" value="" type="string" cy:type="String"/>
      </att>
    </graphics>
  </node>
  <node id="45340" label="ENSMUSG00000020641" cy:nodeId="1079">
    <graphics z="0.0" y="150.28881138183442" x="181.84861245314232">
      <att name="lockedVisualProperties" type="list" cy:type="List">
        <att name="NODE_LABEL" value="" type="string" cy:type="String"/>
      </att>
    </graphics>
  </node>
  <node id="45339" label="ENSMUSG00000021190" cy:nodeId="1080">
    <graphics z="0.0" y="267.6487967333969" x="-152.87740645249733">
      <att name="lockedVisualProperties" type="list" cy:type="List">
        <att name="NODE_LABEL" value="" type="string" cy:type="String"/>
      </att>
    </graphics>
  </node>
  <node id="45338" label="ENSMUSG00000021720" cy:nodeId="1081">
    <graphics z="0.0" y="89.5486685595688" x="-133.33373579820045">
      <att name="lockedVisualProperties" type="list" cy:type="List">
        <att name="NODE_LABEL" value="" type="string" cy:type="String"/>
      </att>
    </graphics>
  </node>
  <node id="45337" label="ENSMUSG00000023832" cy:nodeId="1082">
    <graphics z="0.0" y="-249.5138314404312" x="220.6645285145437">
      <att name="lockedVisualProperties" type="list" cy:type="List">
        <att name="NODE_LABEL" value="" type="string" cy:type="String"/>
      </att>
    </graphics>
  </node>
  <node id="45336" label="ENSMUSG00000026094" cy:nodeId="1083">
    <graphics z="0.0" y="-203.9016945996109" x="217.2598539845144">
      <att name="lockedVisualProperties" type="list" cy:type="List">
        <att name="NODE_LABEL" value="" type="string" cy:type="String"/>
      </att>
    </graphics>
  </node>
  <node id="45335" label="ENSMUSG00000026548" cy:nodeId="1084">
    <graphics z="0.0" y="220.59050815917817" x="-386.7330583079661">
      <att name="lockedVisualProperties" type="list" cy:type="List">
        <att name="NODE_LABEL" value="" type="string" cy:type="String"/>
      </att>
    </graphics>
  </node>
  <node id="45334" label="ENSMUSG00000026786" cy:nodeId="1085">
    <graphics z="0.0" y="-141.39536220214995" x="178.473997260729">
      <att name="lockedVisualProperties" type="list" cy:type="List">
        <att name="NODE_LABEL" value="" type="string" cy:type="String"/>
      </att>
    </graphics>
  </node>
  <node id="45333" label="ENSMUSG00000028415" cy:nodeId="1086">
    <graphics z="0.0" y="93.3578497729477" x="-174.41146406968483">
      <att name="lockedVisualProperties" type="list" cy:type="List">
        <att name="NODE_LABEL" value="" type="string" cy:type="String"/>
      </att>
    </graphics>
  </node>
  <node id="45332" label="ENSMUSG00000028614" cy:nodeId="1087">
    <graphics z="0.0" y="40.77842014648286" x="-207.3097489817942">
      <att name="lockedVisualProperties" type="list" cy:type="List">
        <att name="NODE_LABEL" value="" type="string" cy:type="String"/>
      </att>
    </graphics>
  </node>
  <node id="45331" label="ENSMUSG00000031576" cy:nodeId="1088">
    <graphics z="0.0" y="-191.96216518066558" x="70.20518937269799">
      <att name="lockedVisualProperties" type="list" cy:type="List">
        <att name="NODE_LABEL" value="" type="string" cy:type="String"/>
      </att>
    </graphics>
  </node>
  <node id="45330" label="ENSMUSG00000031584" cy:nodeId="1089">
    <graphics z="0.0" y="-146.87280208252105" x="37.6099287525808">
      <att name="lockedVisualProperties" type="list" cy:type="List">
        <att name="NODE_LABEL" value="" type="string" cy:type="String"/>
      </att>
    </graphics>
  </node>
  <node id="45329" label="ENSMUSG00000034156" cy:nodeId="1090">
    <graphics z="0.0" y="-274.86176234863433" x="91.29739823500267">
      <att name="lockedVisualProperties" type="list" cy:type="List">
        <att name="NODE_LABEL" value="" type="string" cy:type="String"/>
      </att>
    </graphics>
  </node>
  <node id="45328" label="ENSMUSG00000034593" cy:nodeId="1091">
    <graphics z="0.0" y="-225.41754848144683" x="97.56957688490502">
      <att name="lockedVisualProperties" type="list" cy:type="List">
        <att name="NODE_LABEL" value="" type="string" cy:type="String"/>
      </att>
    </graphics>
  </node>
  <node id="45327" label="ENSMUSG00000037754" cy:nodeId="1092">
    <graphics z="0.0" y="73.83312290527192" x="-333.66454634507545">
      <att name="lockedVisualProperties" type="list" cy:type="List">
        <att name="NODE_LABEL" value="" type="string" cy:type="String"/>
      </att>
    </graphics>
  </node>
  <node id="45326" label="ENSMUSG00000037936" cy:nodeId="1093">
    <graphics z="0.0" y="-25.787133518678274" x="-65.77212080796608">
      <att name="lockedVisualProperties" type="list" cy:type="List">
        <att name="NODE_LABEL" value="" type="string" cy:type="String"/>
      </att>
    </graphics>
  </node>
  <node id="45325" label="ENSMUSG00000038843" cy:nodeId="1094">
    <graphics z="0.0" y="65.86631077148286" x="262.0993315235769">
      <att name="lockedVisualProperties" type="list" cy:type="List">
        <att name="NODE_LABEL" value="" type="string" cy:type="String"/>
      </att>
    </graphics>
  </node>
  <node id="45324" label="ENSMUSG00000039958" cy:nodeId="1095">
    <graphics z="0.0" y="280.12383335449067" x="194.95257058302514">
      <att name="lockedVisualProperties" type="list" cy:type="List">
        <att name="NODE_LABEL" value="" type="string" cy:type="String"/>
      </att>
    </graphics>
  </node>
  <node id="45323" label="ENSMUSG00000040136" cy:nodeId="1096">
    <graphics z="0.0" y="-211.50607997558745" x="199.0079485432302">
      <att name="lockedVisualProperties" type="list" cy:type="List">
        <att name="NODE_LABEL" value="" type="string" cy:type="String"/>
      </att>
    </graphics>
  </node>
  <node id="45322" label="ENSMUSG00000040584" cy:nodeId="1097">
    <graphics z="0.0" y="363.25396030761567" x="194.24267258803002">
      <att name="lockedVisualProperties" type="list" cy:type="List">
        <att name="NODE_LABEL" value="" type="string" cy:type="String"/>
      </att>
    </graphics>
  </node>
  <node id="45321" label="ENSMUSG00000042631" cy:nodeId="1098">
    <graphics z="0.0" y="118.61759250976411" x="167.33742013136498">
      <att name="lockedVisualProperties" type="list" cy:type="List">
        <att name="NODE_LABEL" value="" type="string" cy:type="String"/>
      </att>
    </graphics>
  </node>
  <node id="45320" label="ENSMUSG00000048473" cy:nodeId="1099">
    <graphics z="0.0" y="93.5083853564438" x="279.8868605152761">
      <att name="lockedVisualProperties" type="list" cy:type="List">
        <att name="NODE_LABEL" value="" type="string" cy:type="String"/>
      </att>
    </graphics>
  </node>
  <node id="45319" label="ENSMUSG00000048895" cy:nodeId="1100">
    <graphics z="0.0" y="17.86388462402192" x="39.577000285783924">
      <att name="lockedVisualProperties" type="list" cy:type="List">
        <att name="NODE_LABEL" value="" type="string" cy:type="String"/>
      </att>
    </graphics>
  </node>
  <node id="45318" label="ENSMUSG00000049313" cy:nodeId="1101">
    <graphics z="0.0" y="218.6637808642563" x="-70.34897932847389">
      <att name="lockedVisualProperties" type="list" cy:type="List">
        <att name="NODE_LABEL" value="" type="string" cy:type="String"/>
      </att>
    </graphics>
  </node>
  <node id="45317" label="ENSMUSG00000050592" cy:nodeId="1102">
    <graphics z="0.0" y="-86.66249400756988" x="56.582127238908924">
      <att name="lockedVisualProperties" type="list" cy:type="List">
        <att name="NODE_LABEL" value="" type="string" cy:type="String"/>
      </att>
    </graphics>
  </node>
  <node id="45316" label="ENSMUSG00000053137" cy:nodeId="1103">
    <graphics z="0.0" y="310.9973990283188" x="37.81648698011986">
      <att name="lockedVisualProperties" type="list" cy:type="List">
        <att name="NODE_LABEL" value="" type="string" cy:type="String"/>
      </att>
    </graphics>
  </node>
  <node id="45315" label="ENSMUSG00000054484" cy:nodeId="1104">
    <graphics z="0.0" y="109.09308689452973" x="289.6447950855886">
      <att name="lockedVisualProperties" type="list" cy:type="List">
        <att name="NODE_LABEL" value="" type="string" cy:type="String"/>
      </att>
    </graphics>
  </node>
  <node id="45314" label="ENSMUSG00000055978" cy:nodeId="1105">
    <graphics z="0.0" y="209.76061313964692" x="-142.87447676499733">
      <att name="lockedVisualProperties" type="list" cy:type="List">
        <att name="NODE_LABEL" value="" type="string" cy:type="String"/>
      </att>
    </graphics>
  </node>
  <node id="45313" label="ENSMUSG00000056602" cy:nodeId="1106">
    <graphics z="0.0" y="-116.32891017578277" x="70.0467955128347">
      <att name="lockedVisualProperties" type="list" cy:type="List">
        <att name="NODE_LABEL" value="" type="string" cy:type="String"/>
      </att>
    </graphics>
  </node>
  <node id="45312" label="ENSMUSG00000060002" cy:nodeId="1107">
    <graphics z="0.0" y="-193.91738063476714" x="87.67311539808861">
      <att name="lockedVisualProperties" type="list" cy:type="List">
        <att name="NODE_LABEL" value="" type="string" cy:type="String"/>
      </att>
    </graphics>
  </node>
  <node id="45311" label="ENSMUSG00000072235" cy:nodeId="1108">
    <graphics z="0.0" y="-138.09966212890777" x="171.72884764830224">
      <att name="lockedVisualProperties" type="list" cy:type="List">
        <att name="NODE_LABEL" value="" type="string" cy:type="String"/>
      </att>
    </graphics>
  </node>
  <node id="45310" label="ENSMUSG00000072620" cy:nodeId="1109">
    <graphics z="0.0" y="131.27379673339692" x="46.001743938127674">
      <att name="lockedVisualProperties" type="list" cy:type="List">
        <att name="NODE_LABEL" value="" type="string" cy:type="String"/>
      </att>
    </graphics>
  </node>
  <node id="45309" label="ENSMUSG00000020660" cy:nodeId="1110">
    <graphics z="0.0" y="-83.40011912964019" x="-282.15014204820045">
      <att name="lockedVisualProperties" type="list" cy:type="List">
        <att name="NODE_LABEL" value="" type="string" cy:type="String"/>
      </att>
    </graphics>
  </node>
  <node id="45308" label="ENSMUSG00000025402" cy:nodeId="1111">
    <graphics z="0.0" y="-257.27065211914214" x="-362.2893327220286">
      <att name="lockedVisualProperties" type="list" cy:type="List">
        <att name="NODE_LABEL" value="" type="string" cy:type="String"/>
      </att>
    </graphics>
  </node>
  <node id="45307" label="ENSMUSG00000020532" cy:nodeId="1112">
    <graphics z="0.0" y="-415.7458565869156" x="-64.84154829820045">
      <att name="lockedVisualProperties" type="list" cy:type="List">
        <att name="NODE_LABEL" value="" type="string" cy:type="String"/>
      </att>
    </graphics>
  </node>
  <node id="45306" label="ENSMUSG00000041237" cy:nodeId="1113">
    <graphics z="0.0" y="194.8880240283188" x="17.588398601213612">
      <att name="lockedVisualProperties" type="list" cy:type="List">
        <att name="NODE_LABEL" value="" type="string" cy:type="String"/>
      </att>
    </graphics>
  </node>
  <node id="45305" label="ENSMUSG00000041798" cy:nodeId="1114">
    <graphics z="0.0" y="206.6742331347641" x="87.57304825941674">
      <att name="lockedVisualProperties" type="list" cy:type="List">
        <att name="NODE_LABEL" value="" type="string" cy:type="String"/>
      </att>
    </graphics>
  </node>
  <node id="45304" label="ENSMUSG00000042010" cy:nodeId="1115">
    <graphics z="0.0" y="165.08086460449067" x="-253.21328291734108">
      <att name="lockedVisualProperties" type="list" cy:type="List">
        <att name="NODE_LABEL" value="" type="string" cy:type="String"/>
      </att>
    </graphics>
  </node>
  <node id="45303" label="ENSMUSG00000005503" cy:nodeId="1116">
    <graphics z="0.0" y="-306.99509364746245" x="346.7856184498464">
      <att name="lockedVisualProperties" type="list" cy:type="List">
        <att name="NODE_LABEL" value="" type="string" cy:type="String"/>
      </att>
    </graphics>
  </node>
  <node id="45302" label="ENSMUSG00000018486" cy:nodeId="1117">
    <graphics z="0.0" y="49.66160648681489" x="-75.30630049546608">
      <att name="lockedVisualProperties" type="list" cy:type="List">
        <att name="NODE_LABEL" value="" type="string" cy:type="String"/>
      </att>
    </graphics>
  </node>
  <node id="45301" label="ENSMUSG00000029084" cy:nodeId="1118">
    <graphics z="0.0" y="416.0902945361313" x="322.7809034840261">
      <att name="lockedVisualProperties" type="list" cy:type="List">
        <att name="NODE_LABEL" value="" type="string" cy:type="String"/>
      </att>
    </graphics>
  </node>
  <node id="45300" label="ENSMUSG00000029287" cy:nodeId="1119">
    <graphics z="0.0" y="-6.84495097778472" x="-39.1777909739817">
      <att name="lockedVisualProperties" type="list" cy:type="List">
        <att name="NODE_LABEL" value="" type="string" cy:type="String"/>
      </att>
    </graphics>
  </node>
  <node id="45299" label="ENSMUSG00000059142" cy:nodeId="1120">
    <graphics z="0.0" y="-108.04549342773589" x="-135.55712447007545">
      <att name="lockedVisualProperties" type="list" cy:type="List">
        <att name="NODE_LABEL" value="" type="string" cy:type="String"/>
      </att>
    </graphics>
  </node>
  <node id="45298" label="ENSMUSG00000005677" cy:nodeId="1121">
    <graphics z="0.0" y="202.80664890624848" x="-172.09389815171608">
      <att name="lockedVisualProperties" type="list" cy:type="List">
        <att name="NODE_LABEL" value="" type="string" cy:type="String"/>
      </att>
    </graphics>
  </node>
  <node id="45297" label="ENSMUSG00000052131" cy:nodeId="1122">
    <graphics z="0.0" y="144.41030186035005" x="-206.1416581614817">
      <att name="lockedVisualProperties" type="list" cy:type="List">
        <att name="NODE_LABEL" value="" type="string" cy:type="String"/>
      </att>
    </graphics>
  </node>
  <node id="45296" label="ENSMUSG00000056035" cy:nodeId="1123">
    <graphics z="0.0" y="-25.9652646221939" x="-160.7232011302317">
      <att name="lockedVisualProperties" type="list" cy:type="List">
        <att name="NODE_LABEL" value="" type="string" cy:type="String"/>
      </att>
    </graphics>
  </node>
  <node id="45295" label="ENSMUSG00000006362" cy:nodeId="1124">
    <graphics z="0.0" y="-600.257911030275" x="310.1570173756277">
      <att name="lockedVisualProperties" type="list" cy:type="List">
        <att name="NODE_LABEL" value="" type="string" cy:type="String"/>
      </att>
    </graphics>
  </node>
  <node id="45294" label="ENSMUSG00000008398" cy:nodeId="1125">
    <graphics z="0.0" y="-93.30949336670074" x="-289.4845231517161">
      <att name="lockedVisualProperties" type="list" cy:type="List">
        <att name="NODE_LABEL" value="" type="string" cy:type="String"/>
      </att>
    </graphics>
  </node>
  <node id="45293" label="ENSMUSG00000034401" cy:nodeId="1126">
    <graphics z="0.0" y="-23.963301960450735" x="-152.86550459702858">
      <att name="lockedVisualProperties" type="list" cy:type="List">
        <att name="NODE_LABEL" value="" type="string" cy:type="String"/>
      </att>
    </graphics>
  </node>
  <node id="45292" label="ENSMUSG00000038530" cy:nodeId="1127">
    <graphics z="0.0" y="274.5327078662094" x="246.2177626148855">
      <att name="lockedVisualProperties" type="list" cy:type="List">
        <att name="NODE_LABEL" value="" type="string" cy:type="String"/>
      </att>
    </graphics>
  </node>
  <node id="45291" label="ENSMUSG00000000085" cy:nodeId="1128">
    <graphics z="0.0" y="76.99529331542817" x="-37.21906599839576">
      <att name="lockedVisualProperties" type="list" cy:type="List">
        <att name="NODE_LABEL" value="" type="string" cy:type="String"/>
      </att>
    </graphics>
  </node>
  <node id="45290" label="ENSMUSG00000000120" cy:nodeId="1129">
    <graphics z="0.0" y="-207.87248927734527" x="-346.8579972728098">
      <att name="lockedVisualProperties" type="list" cy:type="List">
        <att name="NODE_LABEL" value="" type="string" cy:type="String"/>
      </att>
    </graphics>
  </node>
  <node id="45289" label="ENSMUSG00000000125" cy:nodeId="1130">
    <graphics z="0.0" y="-158.11852199218902" x="215.71398606459252">
      <att name="lockedVisualProperties" type="list" cy:type="List">
        <att name="NODE_LABEL" value="" type="string" cy:type="String"/>
      </att>
    </graphics>
  </node>
  <node id="45288" label="ENSMUSG00000000253" cy:nodeId="1131">
    <graphics z="0.0" y="174.70082920410005" x="-296.9786027415598">
      <att name="lockedVisualProperties" type="list" cy:type="List">
        <att name="NODE_LABEL" value="" type="string" cy:type="String"/>
      </att>
    </graphics>
  </node>
  <node id="45287" label="ENSMUSG00000000296" cy:nodeId="1132">
    <graphics z="0.0" y="103.44127720214692" x="599.893192912737">
      <att name="lockedVisualProperties" type="list" cy:type="List">
        <att name="NODE_LABEL" value="" type="string" cy:type="String"/>
      </att>
    </graphics>
  </node>
  <node id="45286" label="ENSMUSG00000000402" cy:nodeId="1133">
    <graphics z="0.0" y="-300.51361781738433" x="311.5314375416433">
      <att name="lockedVisualProperties" type="list" cy:type="List">
        <att name="NODE_LABEL" value="" type="string" cy:type="String"/>
      </att>
    </graphics>
  </node>
  <node id="45285" label="ENSMUSG00000000409" cy:nodeId="1134">
    <graphics z="0.0" y="108.1834341845688" x="341.5319563404714">
      <att name="lockedVisualProperties" type="list" cy:type="List">
        <att name="NODE_LABEL" value="" type="string" cy:type="String"/>
      </att>
    </graphics>
  </node>
  <node id="45284" label="ENSMUSG00000000416" cy:nodeId="1135">
    <graphics z="0.0" y="-1.2250359692397979" x="194.24084534803978">
      <att name="lockedVisualProperties" type="list" cy:type="List">
        <att name="NODE_LABEL" value="" type="string" cy:type="String"/>
      </att>
    </graphics>
  </node>
  <node id="45283" label="ENSMUSG00000000628" cy:nodeId="1136">
    <graphics z="0.0" y="-59.48774081848296" x="-255.19591841538795">
      <att name="lockedVisualProperties" type="list" cy:type="List">
        <att name="NODE_LABEL" value="" type="string" cy:type="String"/>
      </att>
    </graphics>
  </node>
  <node id="45282" label="ENSMUSG00000000673" cy:nodeId="1137">
    <graphics z="0.0" y="49.07148044921723" x="16.564869548479237">
      <att name="lockedVisualProperties" type="list" cy:type="List">
        <att name="NODE_LABEL" value="" type="string" cy:type="String"/>
      </att>
    </graphics>
  </node>
  <node id="45281" label="ENSMUSG00000000732" cy:nodeId="1138">
    <graphics z="0.0" y="308.0461356005844" x="188.89650216261498">
      <att name="lockedVisualProperties" type="list" cy:type="List">
        <att name="NODE_LABEL" value="" type="string" cy:type="String"/>
      </att>
    </graphics>
  </node>
  <node id="45280" label="ENSMUSG00000000791" cy:nodeId="1139">
    <graphics z="0.0" y="-134.6137841381851" x="203.5997854725515">
      <att name="lockedVisualProperties" type="list" cy:type="List">
        <att name="NODE_LABEL" value="" type="string" cy:type="String"/>
      </att>
    </graphics>
  </node>
  <node id="45279" label="ENSMUSG00000000881" cy:nodeId="1140">
    <graphics z="0.0" y="183.38311069824067" x="-404.6393083079661">
      <att name="lockedVisualProperties" type="list" cy:type="List">
        <att name="NODE_LABEL" value="" type="string" cy:type="String"/>
      </att>
    </graphics>
  </node>
  <node id="45278" label="ENSMUSG00000000958" cy:nodeId="1141">
    <graphics z="0.0" y="-144.57888728759917" x="205.3988405720388">
      <att name="lockedVisualProperties" type="list" cy:type="List">
        <att name="NODE_LABEL" value="" type="string" cy:type="String"/>
      </att>
    </graphics>
  </node>
  <node id="45277" label="ENSMUSG00000001023" cy:nodeId="1142">
    <graphics z="0.0" y="466.09279697753755" x="6.708058025041737">
      <att name="lockedVisualProperties" type="list" cy:type="List">
        <att name="NODE_LABEL" value="" type="string" cy:type="String"/>
      </att>
    </graphics>
  </node>
  <node id="45276" label="ENSMUSG00000001025" cy:nodeId="1143">
    <graphics z="0.0" y="-234.69988185547027" x="-275.1719010814036">
      <att name="lockedVisualProperties" type="list" cy:type="List">
        <att name="NODE_LABEL" value="" type="string" cy:type="String"/>
      </att>
    </graphics>
  </node>
  <node id="45275" label="ENSMUSG00000001095" cy:nodeId="1144">
    <graphics z="0.0" y="13.706288035887155" x="176.2337023274099">
      <att name="lockedVisualProperties" type="list" cy:type="List">
        <att name="NODE_LABEL" value="" type="string" cy:type="String"/>
      </att>
    </graphics>
  </node>
  <node id="45274" label="ENSMUSG00000001225" cy:nodeId="1145">
    <graphics z="0.0" y="-202.33789760254058" x="-29.90526900132545">
      <att name="lockedVisualProperties" type="list" cy:type="List">
        <att name="NODE_LABEL" value="" type="string" cy:type="String"/>
      </att>
    </graphics>
  </node>
  <node id="45273" label="ENSMUSG00000001227" cy:nodeId="1146">
    <graphics z="0.0" y="377.56069248535005" x="51.94739213148705">
      <att name="lockedVisualProperties" type="list" cy:type="List">
        <att name="NODE_LABEL" value="" type="string" cy:type="String"/>
      </att>
    </graphics>
  </node>
  <node id="45272" label="ENSMUSG00000001270" cy:nodeId="1147">
    <graphics z="0.0" y="295.67815464355317" x="418.5904280201589">
      <att name="lockedVisualProperties" type="list" cy:type="List">
        <att name="NODE_LABEL" value="" type="string" cy:type="String"/>
      </att>
    </graphics>
  </node>
  <node id="45271" label="ENSMUSG00000001333" cy:nodeId="1148">
    <graphics z="0.0" y="-112.82178432129058" x="31.437229777971424">
      <att name="lockedVisualProperties" type="list" cy:type="List">
        <att name="NODE_LABEL" value="" type="string" cy:type="String"/>
      </att>
    </graphics>
  </node>
  <node id="45270" label="ENSMUSG00000001436" cy:nodeId="1149">
    <graphics z="0.0" y="52.057579692381296" x="273.49560227553">
      <att name="lockedVisualProperties" type="list" cy:type="List">
        <att name="NODE_LABEL" value="" type="string" cy:type="String"/>
      </att>
    </graphics>
  </node>
  <node id="45269" label="ENSMUSG00000001467" cy:nodeId="1150">
    <graphics z="0.0" y="-208.17999965332183" x="-10.752894733747326">
      <att name="lockedVisualProperties" type="list" cy:type="List">
        <att name="NODE_LABEL" value="" type="string" cy:type="String"/>
      </att>
    </graphics>
  </node>
  <node id="45268" label="ENSMUSG00000001604" cy:nodeId="1151">
    <graphics z="0.0" y="280.7508169970688" x="256.7490660206472">
      <att name="lockedVisualProperties" type="list" cy:type="List">
        <att name="NODE_LABEL" value="" type="string" cy:type="String"/>
      </att>
    </graphics>
  </node>
  <node id="45267" label="ENSMUSG00000001663" cy:nodeId="1152">
    <graphics z="0.0" y="-117.20020229004058" x="-61.94529280503639">
      <att name="lockedVisualProperties" type="list" cy:type="List">
        <att name="NODE_LABEL" value="" type="string" cy:type="String"/>
      </att>
    </graphics>
  </node>
  <node id="45266" label="ENSMUSG00000001665" cy:nodeId="1153">
    <graphics z="0.0" y="328.80339878417817" x="-185.10729536851295">
      <att name="lockedVisualProperties" type="list" cy:type="List">
        <att name="NODE_LABEL" value="" type="string" cy:type="String"/>
      </att>
    </graphics>
  </node>
  <node id="45265" label="ENSMUSG00000001739" cy:nodeId="1154">
    <graphics z="0.0" y="-145.96379787109527" x="-356.3991960032786">
      <att name="lockedVisualProperties" type="list" cy:type="List">
        <att name="NODE_LABEL" value="" type="string" cy:type="String"/>
      </att>
    </graphics>
  </node>
  <node id="45264" label="ENSMUSG00000001802" cy:nodeId="1155">
    <graphics z="0.0" y="350.9379507861313" x="-21.8580888255442">
      <att name="lockedVisualProperties" type="list" cy:type="List">
        <att name="NODE_LABEL" value="" type="string" cy:type="String"/>
      </att>
    </graphics>
  </node>
  <node id="45263" label="ENSMUSG00000001819" cy:nodeId="1156">
    <graphics z="0.0" y="-7.4482243695083525" x="-71.02663740952858">
      <att name="lockedVisualProperties" type="list" cy:type="List">
        <att name="NODE_LABEL" value="" type="string" cy:type="String"/>
      </att>
    </graphics>
  </node>
  <node id="45262" label="ENSMUSG00000001901" cy:nodeId="1157">
    <graphics z="0.0" y="91.02571171142426" x="219.79124512831322">
      <att name="lockedVisualProperties" type="list" cy:type="List">
        <att name="NODE_LABEL" value="" type="string" cy:type="String"/>
      </att>
    </graphics>
  </node>
  <node id="45261" label="ENSMUSG00000001946" cy:nodeId="1158">
    <graphics z="0.0" y="550.8680044970688" x="-85.90023360093483">
      <att name="lockedVisualProperties" type="list" cy:type="List">
        <att name="NODE_LABEL" value="" type="string" cy:type="String"/>
      </att>
    </graphics>
  </node>
  <node id="45260" label="ENSMUSG00000002006" cy:nodeId="1159">
    <graphics z="0.0" y="370.73989170410005" x="-319.43725142320045">
      <att name="lockedVisualProperties" type="list" cy:type="List">
        <att name="NODE_LABEL" value="" type="string" cy:type="String"/>
      </att>
    </graphics>
  </node>
  <node id="45259" label="ENSMUSG00000002105" cy:nodeId="1160">
    <graphics z="0.0" y="482.33400791503755" x="-105.40063032945045">
      <att name="lockedVisualProperties" type="list" cy:type="List">
        <att name="NODE_LABEL" value="" type="string" cy:type="String"/>
      </att>
    </graphics>
  </node>
  <node id="45258" label="ENSMUSG00000002107" cy:nodeId="1161">
    <graphics z="0.0" y="81.28051060058442" x="-157.1655839427317">
      <att name="lockedVisualProperties" type="list" cy:type="List">
        <att name="NODE_LABEL" value="" type="string" cy:type="String"/>
      </att>
    </graphics>
  </node>
  <node id="45257" label="ENSMUSG00000002341" cy:nodeId="1162">
    <graphics z="0.0" y="-547.3368905224625" x="343.62044205824486">
      <att name="lockedVisualProperties" type="list" cy:type="List">
        <att name="NODE_LABEL" value="" type="string" cy:type="String"/>
      </att>
    </graphics>
  </node>
  <node id="45256" label="ENSMUSG00000002365" cy:nodeId="1163">
    <graphics z="0.0" y="336.4679800830063" x="71.1689878956472">
      <att name="lockedVisualProperties" type="list" cy:type="List">
        <att name="NODE_LABEL" value="" type="string" cy:type="String"/>
      </att>
    </graphics>
  </node>
  <node id="45255" label="ENSMUSG00000002384" cy:nodeId="1164">
    <graphics z="0.0" y="-85.65507060669097" x="-312.8909562571848">
      <att name="lockedVisualProperties" type="list" cy:type="List">
        <att name="NODE_LABEL" value="" type="string" cy:type="String"/>
      </att>
    </graphics>
  </node>
  <node id="45254" label="ENSMUSG00000002504" cy:nodeId="1165">
    <graphics z="0.0" y="365.87233799316255" x="63.27095475355736">
      <att name="lockedVisualProperties" type="list" cy:type="List">
        <att name="NODE_LABEL" value="" type="string" cy:type="String"/>
      </att>
    </graphics>
  </node>
  <node id="45253" label="ENSMUSG00000002781" cy:nodeId="1166">
    <graphics z="0.0" y="70.57756107665864" x="514.893192912737">
      <att name="lockedVisualProperties" type="list" cy:type="List">
        <att name="NODE_LABEL" value="" type="string" cy:type="String"/>
      </att>
    </graphics>
  </node>
  <node id="45252" label="ENSMUSG00000002847" cy:nodeId="1167">
    <graphics z="0.0" y="-53.00474101684722" x="307.8490339771902">
      <att name="lockedVisualProperties" type="list" cy:type="List">
        <att name="NODE_LABEL" value="" type="string" cy:type="String"/>
      </att>
    </graphics>
  </node>
  <node id="45251" label="ENSMUSG00000002997" cy:nodeId="1168">
    <graphics z="0.0" y="163.91318577148286" x="265.7534071461355">
      <att name="lockedVisualProperties" type="list" cy:type="List">
        <att name="NODE_LABEL" value="" type="string" cy:type="String"/>
      </att>
    </graphics>
  </node>
  <node id="45250" label="ENSMUSG00000003273" cy:nodeId="1169">
    <graphics z="0.0" y="177.80962437011567" x="398.7899519459402">
      <att name="lockedVisualProperties" type="list" cy:type="List">
        <att name="NODE_LABEL" value="" type="string" cy:type="String"/>
      </att>
    </graphics>
  </node>
  <node id="45249" label="ENSMUSG00000003352" cy:nodeId="1170">
    <graphics z="0.0" y="257.1663443408188" x="-229.50097212632545">
      <att name="lockedVisualProperties" type="list" cy:type="List">
        <att name="NODE_LABEL" value="" type="string" cy:type="String"/>
      </att>
    </graphics>
  </node>
  <node id="45248" label="ENSMUSG00000003355" cy:nodeId="1171">
    <graphics z="0.0" y="-146.03577357910308" x="-295.7196916087473">
      <att name="lockedVisualProperties" type="list" cy:type="List">
        <att name="NODE_LABEL" value="" type="string" cy:type="String"/>
      </att>
    </graphics>
  </node>
  <node id="45247" label="ENSMUSG00000003418" cy:nodeId="1172">
    <graphics z="0.0" y="199.93468540527192" x="-2.9348710521067005">
      <att name="lockedVisualProperties" type="list" cy:type="List">
        <att name="NODE_LABEL" value="" type="string" cy:type="String"/>
      </att>
    </graphics>
  </node>
  <node id="45246" label="ENSMUSG00000003436" cy:nodeId="1173">
    <graphics z="0.0" y="61.925308879393015" x="-250.94094405015358">
      <att name="lockedVisualProperties" type="list" cy:type="List">
        <att name="NODE_LABEL" value="" type="string" cy:type="String"/>
      </att>
    </graphics>
  </node>
  <node id="45245" label="ENSMUSG00000003528" cy:nodeId="1174">
    <graphics z="0.0" y="135.50641697265473" x="102.04506364027611">
      <att name="lockedVisualProperties" type="list" cy:type="List">
        <att name="NODE_LABEL" value="" type="string" cy:type="String"/>
      </att>
    </graphics>
  </node>
  <node id="45244" label="ENSMUSG00000003573" cy:nodeId="1175">
    <graphics z="0.0" y="-191.97556239746245" x="-136.15035567124733">
      <att name="lockedVisualProperties" type="list" cy:type="List">
        <att name="NODE_LABEL" value="" type="string" cy:type="String"/>
      </att>
    </graphics>
  </node>
  <node id="45243" label="ENSMUSG00000004038" cy:nodeId="1176">
    <graphics z="0.0" y="119.62879246093598" x="-120.26711592515358">
      <att name="lockedVisualProperties" type="list" cy:type="List">
        <att name="NODE_LABEL" value="" type="string" cy:type="String"/>
      </att>
    </graphics>
  </node>
  <node id="45242" label="ENSMUSG00000004415" cy:nodeId="1177">
    <graphics z="0.0" y="222.16079014160005" x="19.697865153947987">
      <att name="lockedVisualProperties" type="list" cy:type="List">
        <att name="NODE_LABEL" value="" type="string" cy:type="String"/>
      </att>
    </graphics>
  </node>
  <node id="45241" label="ENSMUSG00000004540" cy:nodeId="1178">
    <graphics z="0.0" y="213.9126822314438" x="403.3991438404714">
      <att name="lockedVisualProperties" type="list" cy:type="List">
        <att name="NODE_LABEL" value="" type="string" cy:type="String"/>
      </att>
    </graphics>
  </node>
  <node id="45240" label="ENSMUSG00000004558" cy:nodeId="1179">
    <graphics z="0.0" y="25.02135532714692" x="170.71584286848656">
      <att name="lockedVisualProperties" type="list" cy:type="List">
        <att name="NODE_LABEL" value="" type="string" cy:type="String"/>
      </att>
    </graphics>
  </node>
  <node id="45239" label="ENSMUSG00000004654" cy:nodeId="1180">
    <graphics z="0.0" y="309.0371939501938" x="-331.7058671458567">
      <att name="lockedVisualProperties" type="list" cy:type="List">
        <att name="NODE_LABEL" value="" type="string" cy:type="String"/>
      </att>
    </graphics>
  </node>
  <node id="45238" label="ENSMUSG00000004709" cy:nodeId="1181">
    <graphics z="0.0" y="-190.3036721386734" x="-196.8562577708567">
      <att name="lockedVisualProperties" type="list" cy:type="List">
        <att name="NODE_LABEL" value="" type="string" cy:type="String"/>
      </att>
    </graphics>
  </node>
  <node id="45237" label="ENSMUSG00000004880" cy:nodeId="1182">
    <graphics z="0.0" y="-165.7472756542984" x="41.442173625627674">
      <att name="lockedVisualProperties" type="list" cy:type="List">
        <att name="NODE_LABEL" value="" type="string" cy:type="String"/>
      </att>
    </graphics>
  </node>
  <node id="45236" label="ENSMUSG00000005237" cy:nodeId="1183">
    <graphics z="0.0" y="-115.39951259277495" x="37.37190690199486">
      <att name="lockedVisualProperties" type="list" cy:type="List">
        <att name="NODE_LABEL" value="" type="string" cy:type="String"/>
      </att>
    </graphics>
  </node>
  <node id="45235" label="ENSMUSG00000005267" cy:nodeId="1184">
    <graphics z="0.0" y="199.8035055957016" x="212.90244736830346">
      <att name="lockedVisualProperties" type="list" cy:type="List">
        <att name="NODE_LABEL" value="" type="string" cy:type="String"/>
      </att>
    </graphics>
  </node>
  <node id="45234" label="ENSMUSG00000005447" cy:nodeId="1185">
    <graphics z="0.0" y="-252.5587533154312" x="-2.487620685895763">
      <att name="lockedVisualProperties" type="list" cy:type="List">
        <att name="NODE_LABEL" value="" type="string" cy:type="String"/>
      </att>
    </graphics>
  </node>
  <node id="45233" label="ENSMUSG00000005470" cy:nodeId="1186">
    <graphics z="0.0" y="258.59645908691255" x="265.74097123304955">
      <att name="lockedVisualProperties" type="list" cy:type="List">
        <att name="NODE_LABEL" value="" type="string" cy:type="String"/>
      </att>
    </graphics>
  </node>
  <node id="45232" label="ENSMUSG00000005553" cy:nodeId="1187">
    <graphics z="0.0" y="428.39736240722505" x="260.42744126478783">
      <att name="lockedVisualProperties" type="list" cy:type="List">
        <att name="NODE_LABEL" value="" type="string" cy:type="String"/>
      </att>
    </graphics>
  </node>
  <node id="45231" label="ENSMUSG00000005672" cy:nodeId="1188">
    <graphics z="0.0" y="-169.7670052685562" x="255.59814896742455">
      <att name="lockedVisualProperties" type="list" cy:type="List">
        <att name="NODE_LABEL" value="" type="string" cy:type="String"/>
      </att>
    </graphics>
  </node>
  <node id="45230" label="ENSMUSG00000005981" cy:nodeId="1189">
    <graphics z="0.0" y="-40.17026788376006" x="181.18420853773705">
      <att name="lockedVisualProperties" type="list" cy:type="List">
        <att name="NODE_LABEL" value="" type="string" cy:type="String"/>
      </att>
    </graphics>
  </node>
  <node id="45229" label="ENSMUSG00000006342" cy:nodeId="1190">
    <graphics z="0.0" y="167.71987217285005" x="353.51941361586205">
      <att name="lockedVisualProperties" type="list" cy:type="List">
        <att name="NODE_LABEL" value="" type="string" cy:type="String"/>
      </att>
    </graphics>
  </node>
  <node id="45228" label="ENSMUSG00000006369" cy:nodeId="1191">
    <graphics z="0.0" y="-39.24551326416167" x="11.240513469377674">
      <att name="lockedVisualProperties" type="list" cy:type="List">
        <att name="NODE_LABEL" value="" type="string" cy:type="String"/>
      </att>
    </graphics>
  </node>
  <node id="45227" label="ENSMUSG00000006378" cy:nodeId="1192">
    <graphics z="0.0" y="-130.36894160888824" x="-44.540187214216076">
      <att name="lockedVisualProperties" type="list" cy:type="List">
        <att name="NODE_LABEL" value="" type="string" cy:type="String"/>
      </att>
    </graphics>
  </node>
  <node id="45226" label="ENSMUSG00000006411" cy:nodeId="1193">
    <graphics z="0.0" y="-348.49436122558745" x="300.74483170668236">
      <att name="lockedVisualProperties" type="list" cy:type="List">
        <att name="NODE_LABEL" value="" type="string" cy:type="String"/>
      </att>
    </graphics>
  </node>
  <node id="45225" label="ENSMUSG00000006546" cy:nodeId="1194">
    <graphics z="0.0" y="-151.26013118408355" x="49.52061906019799">
      <att name="lockedVisualProperties" type="list" cy:type="List">
        <att name="NODE_LABEL" value="" type="string" cy:type="String"/>
      </att>
    </graphics>
  </node>
  <node id="45224" label="ENSMUSG00000006575" cy:nodeId="1195">
    <graphics z="0.0" y="-156.05906612060699" x="-243.8943437083567">
      <att name="lockedVisualProperties" type="list" cy:type="List">
        <att name="NODE_LABEL" value="" type="string" cy:type="String"/>
      </att>
    </graphics>
  </node>
  <node id="45223" label="ENSMUSG00000006586" cy:nodeId="1196">
    <graphics z="0.0" y="265.78554600097505" x="-86.80746016343483">
      <att name="lockedVisualProperties" type="list" cy:type="List">
        <att name="NODE_LABEL" value="" type="string" cy:type="String"/>
      </att>
    </graphics>
  </node>
  <node id="45222" label="ENSMUSG00000006675" cy:nodeId="1197">
    <graphics z="0.0" y="-235.49599391601714" x="-161.8777421458567">
      <att name="lockedVisualProperties" type="list" cy:type="List">
        <att name="NODE_LABEL" value="" type="string" cy:type="String"/>
      </att>
    </graphics>
  </node>
  <node id="45221" label="ENSMUSG00000006777" cy:nodeId="1198">
    <graphics z="0.0" y="114.6960074267563" x="-212.11098799546608">
      <att name="lockedVisualProperties" type="list" cy:type="List">
        <att name="NODE_LABEL" value="" type="string" cy:type="String"/>
      </att>
    </graphics>
  </node>
  <node id="45220" label="ENSMUSG00000007039" cy:nodeId="1199">
    <graphics z="0.0" y="-94.12165004394683" x="549.1398359791433">
      <att name="lockedVisualProperties" type="list" cy:type="List">
        <att name="NODE_LABEL" value="" type="string" cy:type="String"/>
      </att>
    </graphics>
  </node>
  <node id="45219" label="ENSMUSG00000007207" cy:nodeId="1200">
    <graphics z="0.0" y="-104.20806056640777" x="152.57933678785912">
      <att name="lockedVisualProperties" type="list" cy:type="List">
        <att name="NODE_LABEL" value="" type="string" cy:type="String"/>
      </att>
    </graphics>
  </node>
  <node id="45218" label="ENSMUSG00000007950" cy:nodeId="1201">
    <graphics z="0.0" y="283.83574741699067" x="-103.22384199937233">
      <att name="lockedVisualProperties" type="list" cy:type="List">
        <att name="NODE_LABEL" value="" type="string" cy:type="String"/>
      </att>
    </graphics>
  </node>
  <node id="45217" label="ENSMUSG00000008461" cy:nodeId="1202">
    <graphics z="0.0" y="202.02886265136567" x="-173.4579423411692">
      <att name="lockedVisualProperties" type="list" cy:type="List">
        <att name="NODE_LABEL" value="" type="string" cy:type="String"/>
      </att>
    </graphics>
  </node>
  <node id="45216" label="ENSMUSG00000008540" cy:nodeId="1203">
    <graphics z="0.0" y="-98.19974071167144" x="-105.99819502671608">
      <att name="lockedVisualProperties" type="list" cy:type="List">
        <att name="NODE_LABEL" value="" type="string" cy:type="String"/>
      </att>
    </graphics>
  </node>
  <node id="45215" label="ENSMUSG00000009246" cy:nodeId="1204">
    <graphics z="0.0" y="285.82180088378755" x="-7.9786637767160755">
      <att name="lockedVisualProperties" type="list" cy:type="List">
        <att name="NODE_LABEL" value="" type="string" cy:type="String"/>
      </att>
    </graphics>
  </node>
  <node id="45214" label="ENSMUSG00000009378" cy:nodeId="1205">
    <graphics z="0.0" y="-0.20997554443511035" x="-209.15755781968483">
      <att name="lockedVisualProperties" type="list" cy:type="List">
        <att name="NODE_LABEL" value="" type="string" cy:type="String"/>
      </att>
    </graphics>
  </node>
  <node id="45213" label="ENSMUSG00000009614" cy:nodeId="1206">
    <graphics z="0.0" y="137.93987339355317" x="-83.46468672593483">
      <att name="lockedVisualProperties" type="list" cy:type="List">
        <att name="NODE_LABEL" value="" type="string" cy:type="String"/>
      </att>
    </graphics>
  </node>
  <node id="45212" label="ENSMUSG00000009646" cy:nodeId="1207">
    <graphics z="0.0" y="228.04250400878755" x="-139.2717851146067">
      <att name="lockedVisualProperties" type="list" cy:type="List">
        <att name="NODE_LABEL" value="" type="string" cy:type="String"/>
      </att>
    </graphics>
  </node>
  <node id="45211" label="ENSMUSG00000010021" cy:nodeId="1208">
    <graphics z="0.0" y="165.81125706054536" x="26.440540935197987">
      <att name="lockedVisualProperties" type="list" cy:type="List">
        <att name="NODE_LABEL" value="" type="string" cy:type="String"/>
      </att>
    </graphics>
  </node>
  <node id="45210" label="ENSMUSG00000010122" cy:nodeId="1209">
    <graphics z="0.0" y="27.660828288572702" x="349.49231400648705">
      <att name="lockedVisualProperties" type="list" cy:type="List">
        <att name="NODE_LABEL" value="" type="string" cy:type="String"/>
      </att>
    </graphics>
  </node>
  <node id="45209" label="ENSMUSG00000010601" cy:nodeId="1210">
    <graphics z="0.0" y="61.98993748046723" x="-405.4372819407786">
      <att name="lockedVisualProperties" type="list" cy:type="List">
        <att name="NODE_LABEL" value="" type="string" cy:type="String"/>
      </att>
    </graphics>
  </node>
  <node id="45208" label="ENSMUSG00000010651" cy:nodeId="1211">
    <graphics z="0.0" y="2.2716414294418428" x="-344.6291154368723">
      <att name="lockedVisualProperties" type="list" cy:type="List">
        <att name="NODE_LABEL" value="" type="string" cy:type="String"/>
      </att>
    </graphics>
  </node>
  <node id="45207" label="ENSMUSG00000010663" cy:nodeId="1212">
    <graphics z="0.0" y="5.109471019285593" x="-44.5559648021067">
      <att name="lockedVisualProperties" type="list" cy:type="List">
        <att name="NODE_LABEL" value="" type="string" cy:type="String"/>
      </att>
    </graphics>
  </node>
  <node id="45206" label="ENSMUSG00000010803" cy:nodeId="1213">
    <graphics z="0.0" y="-183.40500575683745" x="360.5642286793386">
      <att name="lockedVisualProperties" type="list" cy:type="List">
        <att name="NODE_LABEL" value="" type="string" cy:type="String"/>
      </att>
    </graphics>
  </node>
  <node id="45205" label="ENSMUSG00000011008" cy:nodeId="1214">
    <graphics z="0.0" y="60.88761204101411" x="246.23274674574486">
      <att name="lockedVisualProperties" type="list" cy:type="List">
        <att name="NODE_LABEL" value="" type="string" cy:type="String"/>
      </att>
    </graphics>
  </node>
  <node id="45204" label="ENSMUSG00000011034" cy:nodeId="1215">
    <graphics z="0.0" y="175.1088034472641" x="140.88548340956322">
      <att name="lockedVisualProperties" type="list" cy:type="List">
        <att name="NODE_LABEL" value="" type="string" cy:type="String"/>
      </att>
    </graphics>
  </node>
  <node id="45203" label="ENSMUSG00000011589" cy:nodeId="1216">
    <graphics z="0.0" y="-288.3722298779312" x="358.9922834889089">
      <att name="lockedVisualProperties" type="list" cy:type="List">
        <att name="NODE_LABEL" value="" type="string" cy:type="String"/>
      </att>
    </graphics>
  </node>
  <node id="45202" label="ENSMUSG00000012123" cy:nodeId="1217">
    <graphics z="0.0" y="-342.31503993652495" x="53.2835127369558">
      <att name="lockedVisualProperties" type="list" cy:type="List">
        <att name="NODE_LABEL" value="" type="string" cy:type="String"/>
      </att>
    </graphics>
  </node>
  <node id="45201" label="ENSMUSG00000012443" cy:nodeId="1218">
    <graphics z="0.0" y="-107.40326625488433" x="-172.04470381577858">
      <att name="lockedVisualProperties" type="list" cy:type="List">
        <att name="NODE_LABEL" value="" type="string" cy:type="String"/>
      </att>
    </graphics>
  </node>
  <node id="45200" label="ENSMUSG00000013083" cy:nodeId="1219">
    <graphics z="0.0" y="342.2167593798813" x="300.2778440968191">
      <att name="lockedVisualProperties" type="list" cy:type="List">
        <att name="NODE_LABEL" value="" type="string" cy:type="String"/>
      </att>
    </graphics>
  </node>
  <node id="45199" label="ENSMUSG00000013523" cy:nodeId="1220">
    <graphics z="0.0" y="343.2813650927719" x="180.17741265455834">
      <att name="lockedVisualProperties" type="list" cy:type="List">
        <att name="NODE_LABEL" value="" type="string" cy:type="String"/>
      </att>
    </graphics>
  </node>
  <node id="45198" label="ENSMUSG00000013698" cy:nodeId="1221">
    <graphics z="0.0" y="-316.3561165966812" x="-54.20670637925514">
      <att name="lockedVisualProperties" type="list" cy:type="List">
        <att name="NODE_LABEL" value="" type="string" cy:type="String"/>
      </att>
    </graphics>
  </node>
  <node id="45197" label="ENSMUSG00000013921" cy:nodeId="1222">
    <graphics z="0.0" y="-254.8882668652359" x="-55.79108748277076">
      <att name="lockedVisualProperties" type="list" cy:type="List">
        <att name="NODE_LABEL" value="" type="string" cy:type="String"/>
      </att>
    </graphics>
  </node>
  <node id="45196" label="ENSMUSG00000014599" cy:nodeId="1223">
    <graphics z="0.0" y="140.25330417968598" x="115.52148118178002">
      <att name="lockedVisualProperties" type="list" cy:type="List">
        <att name="NODE_LABEL" value="" type="string" cy:type="String"/>
      </att>
    </graphics>
  </node>
  <node id="45195" label="ENSMUSG00000014846" cy:nodeId="1224">
    <graphics z="0.0" y="-329.9707101025406" x="-39.79059920152076">
      <att name="lockedVisualProperties" type="list" cy:type="List">
        <att name="NODE_LABEL" value="" type="string" cy:type="String"/>
      </att>
    </graphics>
  </node>
  <node id="45194" label="ENSMUSG00000015134" cy:nodeId="1225">
    <graphics z="0.0" y="358.7332388720688" x="-170.06545576890358">
      <att name="lockedVisualProperties" type="list" cy:type="List">
        <att name="NODE_LABEL" value="" type="string" cy:type="String"/>
      </att>
    </graphics>
  </node>
  <node id="45193" label="ENSMUSG00000015189" cy:nodeId="1226">
    <graphics z="0.0" y="248.58568638183442" x="146.35861077467553">
      <att name="lockedVisualProperties" type="list" cy:type="List">
        <att name="NODE_LABEL" value="" type="string" cy:type="String"/>
      </att>
    </graphics>
  </node>
  <node id="45192" label="ENSMUSG00000015222" cy:nodeId="1227">
    <graphics z="0.0" y="176.00624912597505" x="-404.9904435618723">
      <att name="lockedVisualProperties" type="list" cy:type="List">
        <att name="NODE_LABEL" value="" type="string" cy:type="String"/>
      </att>
    </graphics>
  </node>
  <node id="45191" label="ENSMUSG00000015340" cy:nodeId="1228">
    <graphics z="0.0" y="-70.16890651367339" x="191.05151620070092">
      <att name="lockedVisualProperties" type="list" cy:type="List">
        <att name="NODE_LABEL" value="" type="string" cy:type="String"/>
      </att>
    </graphics>
  </node>
  <node id="45190" label="ENSMUSG00000015342" cy:nodeId="1229">
    <graphics z="0.0" y="434.74053257324067" x="-0.323069904645763">
      <att name="lockedVisualProperties" type="list" cy:type="List">
        <att name="NODE_LABEL" value="" type="string" cy:type="String"/>
      </att>
    </graphics>
  </node>
  <node id="45189" label="ENSMUSG00000015401" cy:nodeId="1230">
    <graphics z="0.0" y="-398.9382393994156" x="-207.42956099351295">
      <att name="lockedVisualProperties" type="list" cy:type="List">
        <att name="NODE_LABEL" value="" type="string" cy:type="String"/>
      </att>
    </graphics>
  </node>
  <node id="45188" label="ENSMUSG00000015405" cy:nodeId="1231">
    <graphics z="0.0" y="281.0301138720688" x="321.3524519459402">
      <att name="lockedVisualProperties" type="list" cy:type="List">
        <att name="NODE_LABEL" value="" type="string" cy:type="String"/>
      </att>
    </graphics>
  </node>
  <node id="45187" label="ENSMUSG00000015709" cy:nodeId="1232">
    <graphics z="0.0" y="106.3302847705063" x="-259.27965864976295">
      <att name="lockedVisualProperties" type="list" cy:type="List">
        <att name="NODE_LABEL" value="" type="string" cy:type="String"/>
      </att>
    </graphics>
  </node>
  <node id="45186" label="ENSMUSG00000015962" cy:nodeId="1233">
    <graphics z="0.0" y="39.52011936523286" x="311.5558058277761">
      <att name="lockedVisualProperties" type="list" cy:type="List">
        <att name="NODE_LABEL" value="" type="string" cy:type="String"/>
      </att>
    </graphics>
  </node>
  <node id="45185" label="ENSMUSG00000016382" cy:nodeId="1234">
    <graphics z="0.0" y="313.0955740771469" x="358.9212080494558">
      <att name="lockedVisualProperties" type="list" cy:type="List">
        <att name="NODE_LABEL" value="" type="string" cy:type="String"/>
      </att>
    </graphics>
  </node>
  <node id="45184" label="ENSMUSG00000016534" cy:nodeId="1235">
    <graphics z="0.0" y="-44.026982609254446" x="-78.83170637925514">
      <att name="lockedVisualProperties" type="list" cy:type="List">
        <att name="NODE_LABEL" value="" type="string" cy:type="String"/>
      </att>
    </graphics>
  </node>
  <node id="45183" label="ENSMUSG00000016541" cy:nodeId="1236">
    <graphics z="0.0" y="144.15013950683442" x="-207.17568526109108">
      <att name="lockedVisualProperties" type="list" cy:type="List">
        <att name="NODE_LABEL" value="" type="string" cy:type="String"/>
      </att>
    </graphics>
  </node>
  <node id="45182" label="ENSMUSG00000017195" cy:nodeId="1237">
    <graphics z="0.0" y="133.93515842773286" x="-263.3581193431223">
      <att name="lockedVisualProperties" type="list" cy:type="List">
        <att name="NODE_LABEL" value="" type="string" cy:type="String"/>
      </att>
    </graphics>
  </node>
  <node id="45181" label="ENSMUSG00000017211" cy:nodeId="1238">
    <graphics z="0.0" y="272.55449741699067" x="-199.43773970445045">
      <att name="lockedVisualProperties" type="list" cy:type="List">
        <att name="NODE_LABEL" value="" type="string" cy:type="String"/>
      </att>
    </graphics>
  </node>
  <node id="45180" label="ENSMUSG00000017453" cy:nodeId="1239">
    <graphics z="0.0" y="114.66495579101411" x="-232.09353194077858">
      <att name="lockedVisualProperties" type="list" cy:type="List">
        <att name="NODE_LABEL" value="" type="string" cy:type="String"/>
      </att>
    </graphics>
  </node>
  <node id="45179" label="ENSMUSG00000017667" cy:nodeId="1240">
    <graphics z="0.0" y="-233.5142434277359" x="-220.25313887437233">
      <att name="lockedVisualProperties" type="list" cy:type="List">
        <att name="NODE_LABEL" value="" type="string" cy:type="String"/>
      </att>
    </graphics>
  </node>
  <node id="45178" label="ENSMUSG00000017688" cy:nodeId="1241">
    <graphics z="0.0" y="36.28821628906098" x="292.07967057386986">
      <att name="lockedVisualProperties" type="list" cy:type="List">
        <att name="NODE_LABEL" value="" type="string" cy:type="String"/>
      </att>
    </graphics>
  </node>
  <node id="45177" label="ENSMUSG00000017765" cy:nodeId="1242">
    <graphics z="0.0" y="82.0892950854477" x="251.7317091480886">
      <att name="lockedVisualProperties" type="list" cy:type="List">
        <att name="NODE_LABEL" value="" type="string" cy:type="String"/>
      </att>
    </graphics>
  </node>
  <node id="45176" label="ENSMUSG00000017943" cy:nodeId="1243">
    <graphics z="0.0" y="122.94449680663911" x="-215.47164473374733">
      <att name="lockedVisualProperties" type="list" cy:type="List">
        <att name="NODE_LABEL" value="" type="string" cy:type="String"/>
      </att>
    </graphics>
  </node>
  <node id="45175" label="ENSMUSG00000018143" cy:nodeId="1244">
    <graphics z="0.0" y="51.1526495776352" x="56.15914597670189">
      <att name="lockedVisualProperties" type="list" cy:type="List">
        <att name="NODE_LABEL" value="" type="string" cy:type="String"/>
      </att>
    </graphics>
  </node>
  <node id="45174" label="ENSMUSG00000018169" cy:nodeId="1245">
    <graphics z="0.0" y="58.7354132495102" x="-444.7846940501536">
      <att name="lockedVisualProperties" type="list" cy:type="List">
        <att name="NODE_LABEL" value="" type="string" cy:type="String"/>
      </att>
    </graphics>
  </node>
  <node id="45173" label="ENSMUSG00000018411" cy:nodeId="1246">
    <graphics z="0.0" y="-8.547240559083548" x="266.41624131361596">
      <att name="lockedVisualProperties" type="list" cy:type="List">
        <att name="NODE_LABEL" value="" type="string" cy:type="String"/>
      </att>
    </graphics>
  </node>
  <node id="45172" label="ENSMUSG00000018507" cy:nodeId="1247">
    <graphics z="0.0" y="212.1973044238266" x="13.3263594166433">
      <att name="lockedVisualProperties" type="list" cy:type="List">
        <att name="NODE_LABEL" value="" type="string" cy:type="String"/>
      </att>
    </graphics>
  </node>
  <node id="45171" label="ENSMUSG00000018554" cy:nodeId="1248">
    <graphics z="0.0" y="-171.6751320996109" x="199.6376043812429">
      <att name="lockedVisualProperties" type="list" cy:type="List">
        <att name="NODE_LABEL" value="" type="string" cy:type="String"/>
      </att>
    </graphics>
  </node>
  <node id="45170" label="ENSMUSG00000018620" cy:nodeId="1249">
    <graphics z="0.0" y="42.60167759277192" x="-290.9426835521067">
      <att name="lockedVisualProperties" type="list" cy:type="List">
        <att name="NODE_LABEL" value="" type="string" cy:type="String"/>
      </att>
    </graphics>
  </node>
  <node id="45169" label="ENSMUSG00000018672" cy:nodeId="1250">
    <graphics z="0.0" y="-88.34370357177886" x="-45.472987507184826">
      <att name="lockedVisualProperties" type="list" cy:type="List">
        <att name="NODE_LABEL" value="" type="string" cy:type="String"/>
      </att>
    </graphics>
  </node>
  <node id="45168" label="ENSMUSG00000018752" cy:nodeId="1251">
    <graphics z="0.0" y="128.41478794433442" x="-127.11989912827858">
      <att name="lockedVisualProperties" type="list" cy:type="List">
        <att name="NODE_LABEL" value="" type="string" cy:type="String"/>
      </att>
    </graphics>
  </node>
  <node id="45167" label="ENSMUSG00000018800" cy:nodeId="1252">
    <graphics z="0.0" y="176.21552341796723" x="-321.2830155833567">
      <att name="lockedVisualProperties" type="list" cy:type="List">
        <att name="NODE_LABEL" value="" type="string" cy:type="String"/>
      </att>
    </graphics>
  </node>
  <node id="45166" label="ENSMUSG00000018846" cy:nodeId="1253">
    <graphics z="0.0" y="67.02452152587739" x="-265.8780168040598">
      <att name="lockedVisualProperties" type="list" cy:type="List">
        <att name="NODE_LABEL" value="" type="string" cy:type="String"/>
      </att>
    </graphics>
  </node>
  <node id="45165" label="ENSMUSG00000018862" cy:nodeId="1254">
    <graphics z="0.0" y="190.11174839355317" x="-264.5470536692942">
      <att name="lockedVisualProperties" type="list" cy:type="List">
        <att name="NODE_LABEL" value="" type="string" cy:type="String"/>
      </att>
    </graphics>
  </node>
  <node id="45164" label="ENSMUSG00000018906" cy:nodeId="1255">
    <graphics z="0.0" y="52.847252543943796" x="-261.9950822337473">
      <att name="lockedVisualProperties" type="list" cy:type="List">
        <att name="NODE_LABEL" value="" type="string" cy:type="String"/>
      </att>
    </graphics>
  </node>
  <node id="45163" label="ENSMUSG00000018919" cy:nodeId="1256">
    <graphics z="0.0" y="184.12529819824067" x="-166.41121992905983">
      <att name="lockedVisualProperties" type="list" cy:type="List">
        <att name="NODE_LABEL" value="" type="string" cy:type="String"/>
      </att>
    </graphics>
  </node>
  <node id="45162" label="ENSMUSG00000018924" cy:nodeId="1257">
    <graphics z="0.0" y="520.2974478564438" x="315.64551224867455">
      <att name="lockedVisualProperties" type="list" cy:type="List">
        <att name="NODE_LABEL" value="" type="string" cy:type="String"/>
      </att>
    </graphics>
  </node>
  <node id="45161" label="ENSMUSG00000019066" cy:nodeId="1258">
    <graphics z="0.0" y="9.711273845213327" x="-64.91686568101295">
      <att name="lockedVisualProperties" type="list" cy:type="List">
        <att name="NODE_LABEL" value="" type="string" cy:type="String"/>
      </att>
    </graphics>
  </node>
  <node id="45160" label="ENSMUSG00000019124" cy:nodeId="1259">
    <graphics z="0.0" y="-62.94103557251128" x="-392.8449967845286">
      <att name="lockedVisualProperties" type="list" cy:type="List">
        <att name="NODE_LABEL" value="" type="string" cy:type="String"/>
      </att>
    </graphics>
  </node>
  <node id="45159" label="ENSMUSG00000019232" cy:nodeId="1260">
    <graphics z="0.0" y="-243.13356715820464" x="-30.631434772809826">
      <att name="lockedVisualProperties" type="list" cy:type="List">
        <att name="NODE_LABEL" value="" type="string" cy:type="String"/>
      </att>
    </graphics>
  </node>
  <node id="45158" label="ENSMUSG00000019235" cy:nodeId="1261">
    <graphics z="0.0" y="299.8317801318344" x="-118.38027510484108">
      <att name="lockedVisualProperties" type="list" cy:type="List">
        <att name="NODE_LABEL" value="" type="string" cy:type="String"/>
      </att>
    </graphics>
  </node>
  <node id="45157" label="ENSMUSG00000019359" cy:nodeId="1262">
    <graphics z="0.0" y="452.5723502001938" x="-82.0664628489817">
      <att name="lockedVisualProperties" type="list" cy:type="List">
        <att name="NODE_LABEL" value="" type="string" cy:type="String"/>
      </att>
    </graphics>
  </node>
  <node id="45156" label="ENSMUSG00000019775" cy:nodeId="1263">
    <graphics z="0.0" y="408.67583530761567" x="84.27074875990502">
      <att name="lockedVisualProperties" type="list" cy:type="List">
        <att name="NODE_LABEL" value="" type="string" cy:type="String"/>
      </att>
    </graphics>
  </node>
  <node id="45155" label="ENSMUSG00000019838" cy:nodeId="1264">
    <graphics z="0.0" y="-54.12259799621734" x="140.95977463881127">
      <att name="lockedVisualProperties" type="list" cy:type="List">
        <att name="NODE_LABEL" value="" type="string" cy:type="String"/>
      </att>
    </graphics>
  </node>
  <node id="45154" label="ENSMUSG00000019843" cy:nodeId="1265">
    <graphics z="0.0" y="-75.69745570800933" x="85.13428177992455">
      <att name="lockedVisualProperties" type="list" cy:type="List">
        <att name="NODE_LABEL" value="" type="string" cy:type="String"/>
      </att>
    </graphics>
  </node>
  <node id="45153" label="ENSMUSG00000019876" cy:nodeId="1266">
    <graphics z="0.0" y="278.8410269580063" x="-132.05837569077858">
      <att name="lockedVisualProperties" type="list" cy:type="List">
        <att name="NODE_LABEL" value="" type="string" cy:type="String"/>
      </att>
    </graphics>
  </node>
  <node id="45152" label="ENSMUSG00000019877" cy:nodeId="1267">
    <graphics z="0.0" y="136.81353062011567" x="185.61078705946557">
      <att name="lockedVisualProperties" type="list" cy:type="List">
        <att name="NODE_LABEL" value="" type="string" cy:type="String"/>
      </att>
    </graphics>
  </node>
  <node id="45151" label="ENSMUSG00000019890" cy:nodeId="1268">
    <graphics z="0.0" y="-3.0129101910415557" x="392.8347059742605">
      <att name="lockedVisualProperties" type="list" cy:type="List">
        <att name="NODE_LABEL" value="" type="string" cy:type="String"/>
      </att>
    </graphics>
  </node>
  <node id="45150" label="ENSMUSG00000019900" cy:nodeId="1269">
    <graphics z="0.0" y="84.27211826660005" x="43.674229289690174">
      <att name="lockedVisualProperties" type="list" cy:type="List">
        <att name="NODE_LABEL" value="" type="string" cy:type="String"/>
      </att>
    </graphics>
  </node>
  <node id="45149" label="ENSMUSG00000019906" cy:nodeId="1270">
    <graphics z="0.0" y="483.27578037597505" x="28.854649211565174">
      <att name="lockedVisualProperties" type="list" cy:type="List">
        <att name="NODE_LABEL" value="" type="string" cy:type="String"/>
      </att>
    </graphics>
  </node>
  <node id="45148" label="ENSMUSG00000019945" cy:nodeId="1271">
    <graphics z="0.0" y="-18.49414760254058" x="315.2849318043386">
      <att name="lockedVisualProperties" type="list" cy:type="List">
        <att name="NODE_LABEL" value="" type="string" cy:type="String"/>
      </att>
    </graphics>
  </node>
  <node id="45147" label="ENSMUSG00000019982" cy:nodeId="1272">
    <graphics z="0.0" y="47.20763462402192" x="56.12756028334252">
      <att name="lockedVisualProperties" type="list" cy:type="List">
        <att name="NODE_LABEL" value="" type="string" cy:type="String"/>
      </att>
    </graphics>
  </node>
  <node id="45146" label="ENSMUSG00000020000" cy:nodeId="1273">
    <graphics z="0.0" y="60.54273289062348" x="34.668003703752674">
      <att name="lockedVisualProperties" type="list" cy:type="List">
        <att name="NODE_LABEL" value="" type="string" cy:type="String"/>
      </att>
    </graphics>
  </node>
  <node id="45145" label="ENSMUSG00000020010" cy:nodeId="1274">
    <graphics z="0.0" y="-222.85504848144683" x="25.164997722307362">
      <att name="lockedVisualProperties" type="list" cy:type="List">
        <att name="NODE_LABEL" value="" type="string" cy:type="String"/>
      </att>
    </graphics>
  </node>
  <node id="45144" label="ENSMUSG00000020034" cy:nodeId="1275">
    <graphics z="0.0" y="106.22179478027192" x="37.053318645158924">
      <att name="lockedVisualProperties" type="list" cy:type="List">
        <att name="NODE_LABEL" value="" type="string" cy:type="String"/>
      </att>
    </graphics>
  </node>
  <node id="45143" label="ENSMUSG00000020086" cy:nodeId="1276">
    <graphics z="0.0" y="77.25699680663911" x="295.6372496143972">
      <att name="lockedVisualProperties" type="list" cy:type="List">
        <att name="NODE_LABEL" value="" type="string" cy:type="String"/>
      </att>
    </graphics>
  </node>
  <node id="45142" label="ENSMUSG00000020092" cy:nodeId="1277">
    <graphics z="0.0" y="-74.5903695263687" x="-203.25976118882545">
      <att name="lockedVisualProperties" type="list" cy:type="List">
        <att name="NODE_LABEL" value="" type="string" cy:type="String"/>
      </att>
    </graphics>
  </node>
  <node id="45141" label="ENSMUSG00000020175" cy:nodeId="1278">
    <graphics z="0.0" y="363.02419346191255" x="-231.3784745677317">
      <att name="lockedVisualProperties" type="list" cy:type="List">
        <att name="NODE_LABEL" value="" type="string" cy:type="String"/>
      </att>
    </graphics>
  </node>
  <node id="45140" label="ENSMUSG00000020178" cy:nodeId="1279">
    <graphics z="0.0" y="-298.59628993652495" x="107.80809464613549">
      <att name="lockedVisualProperties" type="list" cy:type="List">
        <att name="NODE_LABEL" value="" type="string" cy:type="String"/>
      </att>
    </graphics>
  </node>
  <node id="45139" label="ENSMUSG00000020186" cy:nodeId="1280">
    <graphics z="0.0" y="-34.62401897094878" x="-198.68578657945045">
      <att name="lockedVisualProperties" type="list" cy:type="List">
        <att name="NODE_LABEL" value="" type="string" cy:type="String"/>
      </att>
    </graphics>
  </node>
  <node id="45138" label="ENSMUSG00000020218" cy:nodeId="1281">
    <graphics z="0.0" y="112.81464451171723" x="-57.83472761948951">
      <att name="lockedVisualProperties" type="list" cy:type="List">
        <att name="NODE_LABEL" value="" type="string" cy:type="String"/>
      </att>
    </graphics>
  </node>
  <node id="45137" label="ENSMUSG00000020226" cy:nodeId="1282">
    <graphics z="0.0" y="64.5575796923813" x="233.02582993666283">
      <att name="lockedVisualProperties" type="list" cy:type="List">
        <att name="NODE_LABEL" value="" type="string" cy:type="String"/>
      </att>
    </graphics>
  </node>
  <node id="45136" label="ENSMUSG00000020229" cy:nodeId="1283">
    <graphics z="0.0" y="84.28893345214692" x="307.244007732073">
      <att name="lockedVisualProperties" type="list" cy:type="List">
        <att name="NODE_LABEL" value="" type="string" cy:type="String"/>
      </att>
    </graphics>
  </node>
  <node id="45135" label="ENSMUSG00000020230" cy:nodeId="1284">
    <graphics z="0.0" y="125.64318149902192" x="68.69490494886986">
      <att name="lockedVisualProperties" type="list" cy:type="List">
        <att name="NODE_LABEL" value="" type="string" cy:type="String"/>
      </att>
    </graphics>
  </node>
  <node id="45134" label="ENSMUSG00000020261" cy:nodeId="1285">
    <graphics z="0.0" y="-210.93047267578277" x="240.10105576674096">
      <att name="lockedVisualProperties" type="list" cy:type="List">
        <att name="NODE_LABEL" value="" type="string" cy:type="String"/>
      </att>
    </graphics>
  </node>
  <node id="45133" label="ENSMUSG00000020268" cy:nodeId="1286">
    <graphics z="0.0" y="227.0751578173813" x="-94.86355147202858">
      <att name="lockedVisualProperties" type="list" cy:type="List">
        <att name="NODE_LABEL" value="" type="string" cy:type="String"/>
      </att>
    </graphics>
  </node>
  <node id="45132" label="ENSMUSG00000020381" cy:nodeId="1287">
    <graphics z="0.0" y="-288.4221108593765" x="-284.3378251536692">
      <att name="lockedVisualProperties" type="list" cy:type="List">
        <att name="NODE_LABEL" value="" type="string" cy:type="String"/>
      </att>
    </graphics>
  </node>
  <node id="45131" label="ENSMUSG00000020388" cy:nodeId="1288">
    <graphics z="0.0" y="318.15920322753755" x="-24.274119709333263">
      <att name="lockedVisualProperties" type="list" cy:type="List">
        <att name="NODE_LABEL" value="" type="string" cy:type="String"/>
      </att>
    </graphics>
  </node>
  <node id="45130" label="ENSMUSG00000020402" cy:nodeId="1289">
    <graphics z="0.0" y="-124.9513314404312" x="105.96944108168236">
      <att name="lockedVisualProperties" type="list" cy:type="List">
        <att name="NODE_LABEL" value="" type="string" cy:type="String"/>
      </att>
    </graphics>
  </node>
  <node id="45129" label="ENSMUSG00000020423" cy:nodeId="1290">
    <graphics z="0.0" y="-142.0476449169937" x="116.88294663588158">
      <att name="lockedVisualProperties" type="list" cy:type="List">
        <att name="NODE_LABEL" value="" type="string" cy:type="String"/>
      </att>
    </graphics>
  </node>
  <node id="45128" label="ENSMUSG00000020435" cy:nodeId="1291">
    <graphics z="0.0" y="-9.01483279846343" x="-141.2660478099192">
      <att name="lockedVisualProperties" type="list" cy:type="List">
        <att name="NODE_LABEL" value="" type="string" cy:type="String"/>
      </att>
    </graphics>
  </node>
  <node id="45127" label="ENSMUSG00000020447" cy:nodeId="1292">
    <graphics z="0.0" y="181.73680942870942" x="-334.1743424876536">
      <att name="lockedVisualProperties" type="list" cy:type="List">
        <att name="NODE_LABEL" value="" type="string" cy:type="String"/>
      </att>
    </graphics>
  </node>
  <node id="45126" label="ENSMUSG00000020462" cy:nodeId="1293">
    <graphics z="0.0" y="279.39434116699067" x="-5.3490861399973255">
      <att name="lockedVisualProperties" type="list" cy:type="List">
        <att name="NODE_LABEL" value="" type="string" cy:type="String"/>
      </att>
    </graphics>
  </node>
  <node id="45125" label="ENSMUSG00000020467" cy:nodeId="1294">
    <graphics z="0.0" y="259.6093375048813" x="123.79444947401635">
      <att name="lockedVisualProperties" type="list" cy:type="List">
        <att name="NODE_LABEL" value="" type="string" cy:type="String"/>
      </att>
    </graphics>
  </node>
  <node id="45124" label="ENSMUSG00000020469" cy:nodeId="1295">
    <graphics z="0.0" y="-87.10376674316558" x="420.99658646742455">
      <att name="lockedVisualProperties" type="list" cy:type="List">
        <att name="NODE_LABEL" value="" type="string" cy:type="String"/>
      </att>
    </graphics>
  </node>
  <node id="45123" label="ENSMUSG00000020472" cy:nodeId="1296">
    <graphics z="0.0" y="56.218285258787546" x="102.12517228285424">
      <att name="lockedVisualProperties" type="list" cy:type="List">
        <att name="NODE_LABEL" value="" type="string" cy:type="String"/>
      </att>
    </graphics>
  </node>
  <node id="45122" label="ENSMUSG00000020534" cy:nodeId="1297">
    <graphics z="0.0" y="-389.0388253369156" x="-82.83080611070045">
      <att name="lockedVisualProperties" type="list" cy:type="List">
        <att name="NODE_LABEL" value="" type="string" cy:type="String"/>
      </att>
    </graphics>
  </node>
  <node id="45121" label="ENSMUSG00000020572" cy:nodeId="1298">
    <graphics z="0.0" y="-145.22731715820464" x="-102.2509110911692">
      <att name="lockedVisualProperties" type="list" cy:type="List">
        <att name="NODE_LABEL" value="" type="string" cy:type="String"/>
      </att>
    </graphics>
  </node>
  <node id="45120" label="ENSMUSG00000020600" cy:nodeId="1299">
    <graphics z="0.0" y="3.4746176562484834" x="286.7726027027761">
      <att name="lockedVisualProperties" type="list" cy:type="List">
        <att name="NODE_LABEL" value="" type="string" cy:type="String"/>
      </att>
    </graphics>
  </node>
  <node id="45119" label="ENSMUSG00000020620" cy:nodeId="1300">
    <graphics z="0.0" y="75.59123295165864" x="365.58533158461205">
      <att name="lockedVisualProperties" type="list" cy:type="List">
        <att name="NODE_LABEL" value="" type="string" cy:type="String"/>
      </att>
    </graphics>
  </node>
  <node id="45118" label="ENSMUSG00000020658" cy:nodeId="1301">
    <graphics z="0.0" y="-30.509213034135428" x="332.3726545826589">
      <att name="lockedVisualProperties" type="list" cy:type="List">
        <att name="NODE_LABEL" value="" type="string" cy:type="String"/>
      </att>
    </graphics>
  </node>
  <node id="45117" label="ENSMUSG00000020684" cy:nodeId="1302">
    <graphics z="0.0" y="-63.78949100158843" x="35.61647477308861">
      <att name="lockedVisualProperties" type="list" cy:type="List">
        <att name="NODE_LABEL" value="" type="string" cy:type="String"/>
      </att>
    </graphics>
  </node>
  <node id="45116" label="ENSMUSG00000020696" cy:nodeId="1303">
    <graphics z="0.0" y="305.1665884814438" x="-128.31740889390358">
      <att name="lockedVisualProperties" type="list" cy:type="List">
        <att name="NODE_LABEL" value="" type="string" cy:type="String"/>
      </att>
    </graphics>
  </node>
  <node id="45115" label="ENSMUSG00000020707" cy:nodeId="1304">
    <graphics z="0.0" y="242.70827549316255" x="-213.38393721421608">
      <att name="lockedVisualProperties" type="list" cy:type="List">
        <att name="NODE_LABEL" value="" type="string" cy:type="String"/>
      </att>
    </graphics>
  </node>
  <node id="45114" label="ENSMUSG00000020732" cy:nodeId="1305">
    <graphics z="0.0" y="-97.10512096069488" x="-29.7837480052317">
      <att name="lockedVisualProperties" type="list" cy:type="List">
        <att name="NODE_LABEL" value="" type="string" cy:type="String"/>
      </att>
    </graphics>
  </node>
  <node id="45113" label="ENSMUSG00000020766" cy:nodeId="1306">
    <graphics z="0.0" y="-85.24862224243316" x="213.28338685194603">
      <att name="lockedVisualProperties" type="list" cy:type="List">
        <att name="NODE_LABEL" value="" type="string" cy:type="String"/>
      </att>
    </graphics>
  </node>
  <node id="45112" label="ENSMUSG00000020788" cy:nodeId="1307">
    <graphics z="0.0" y="-104.0571892895523" x="230.0411039845144">
      <att name="lockedVisualProperties" type="list" cy:type="List">
        <att name="NODE_LABEL" value="" type="string" cy:type="String"/>
      </att>
    </graphics>
  </node>
  <node id="45111" label="ENSMUSG00000020814" cy:nodeId="1308">
    <graphics z="0.0" y="-13.805632893067923" x="332.4056135670339">
      <att name="lockedVisualProperties" type="list" cy:type="List">
        <att name="NODE_LABEL" value="" type="string" cy:type="String"/>
      </att>
    </graphics>
  </node>
  <node id="45110" label="ENSMUSG00000020875" cy:nodeId="1309">
    <graphics z="0.0" y="173.73120945312348" x="211.06641450087182">
      <att name="lockedVisualProperties" type="list" cy:type="List">
        <att name="NODE_LABEL" value="" type="string" cy:type="String"/>
      </att>
    </graphics>
  </node>
  <node id="45109" label="ENSMUSG00000020900" cy:nodeId="1310">
    <graphics z="0.0" y="-172.24175197265777" x="248.24637284437767">
      <att name="lockedVisualProperties" type="list" cy:type="List">
        <att name="NODE_LABEL" value="" type="string" cy:type="String"/>
      </att>
    </graphics>
  </node>
  <node id="45108" label="ENSMUSG00000020953" cy:nodeId="1311">
    <graphics z="0.0" y="-15.125716511231985" x="306.551869060198">
      <att name="lockedVisualProperties" type="list" cy:type="List">
        <att name="NODE_LABEL" value="" type="string" cy:type="String"/>
      </att>
    </graphics>
  </node>
  <node id="45107" label="ENSMUSG00000020986" cy:nodeId="1312">
    <graphics z="0.0" y="-38.91969043396148" x="226.14075532118432">
      <att name="lockedVisualProperties" type="list" cy:type="List">
        <att name="NODE_LABEL" value="" type="string" cy:type="String"/>
      </att>
    </graphics>
  </node>
  <node id="45106" label="ENSMUSG00000021013" cy:nodeId="1313">
    <graphics z="0.0" y="-80.43453914306792" x="-188.09389815171608">
      <att name="lockedVisualProperties" type="list" cy:type="List">
        <att name="NODE_LABEL" value="" type="string" cy:type="String"/>
      </att>
    </graphics>
  </node>
  <node id="45105" label="ENSMUSG00000021061" cy:nodeId="1314">
    <graphics z="0.0" y="-114.50527888916167" x="-121.31881270249733">
      <att name="lockedVisualProperties" type="list" cy:type="List">
        <att name="NODE_LABEL" value="" type="string" cy:type="String"/>
      </att>
    </graphics>
  </node>
  <node id="45104" label="ENSMUSG00000021123" cy:nodeId="1315">
    <graphics z="0.0" y="62.566849406736765" x="91.8157392994558">
      <att name="lockedVisualProperties" type="list" cy:type="List">
        <att name="NODE_LABEL" value="" type="string" cy:type="String"/>
      </att>
    </graphics>
  </node>
  <node id="45103" label="ENSMUSG00000021175" cy:nodeId="1316">
    <graphics z="0.0" y="-106.6392205395523" x="-306.7336076243723">
      <att name="lockedVisualProperties" type="list" cy:type="List">
        <att name="NODE_LABEL" value="" type="string" cy:type="String"/>
      </att>
    </graphics>
  </node>
  <node id="45102" label="ENSMUSG00000021198" cy:nodeId="1317">
    <graphics z="0.0" y="76.54096287109223" x="-278.5543473704661">
      <att name="lockedVisualProperties" type="list" cy:type="List">
        <att name="NODE_LABEL" value="" type="string" cy:type="String"/>
      </att>
    </graphics>
  </node>
  <node id="45101" label="ENSMUSG00000021208" cy:nodeId="1318">
    <graphics z="0.0" y="-19.091256443482962" x="-56.59948286851295">
      <att name="lockedVisualProperties" type="list" cy:type="List">
        <att name="NODE_LABEL" value="" type="string" cy:type="String"/>
      </att>
    </graphics>
  </node>
  <node id="45100" label="ENSMUSG00000021213" cy:nodeId="1319">
    <graphics z="0.0" y="-233.19220668457183" x="239.13626542250267">
      <att name="lockedVisualProperties" type="list" cy:type="List">
        <att name="NODE_LABEL" value="" type="string" cy:type="String"/>
      </att>
    </graphics>
  </node>
  <node id="45099" label="ENSMUSG00000021221" cy:nodeId="1320">
    <graphics z="0.0" y="18.20256870605317" x="-202.78798994859108">
      <att name="lockedVisualProperties" type="list" cy:type="List">
        <att name="NODE_LABEL" value="" type="string" cy:type="String"/>
      </att>
    </graphics>
  </node>
  <node id="45098" label="ENSMUSG00000021226" cy:nodeId="1321">
    <graphics z="0.0" y="5.746170695799265" x="247.93885483900658">
      <att name="lockedVisualProperties" type="list" cy:type="List">
        <att name="NODE_LABEL" value="" type="string" cy:type="String"/>
      </att>
    </graphics>
  </node>
  <node id="45097" label="ENSMUSG00000021303" cy:nodeId="1322">
    <graphics z="0.0" y="330.46978062011567" x="41.7062422291433">
      <att name="lockedVisualProperties" type="list" cy:type="List">
        <att name="NODE_LABEL" value="" type="string" cy:type="String"/>
      </att>
    </graphics>
  </node>
  <node id="45096" label="ENSMUSG00000021340" cy:nodeId="1323">
    <graphics z="0.0" y="-227.94846278808745" x="32.45454850355736">
      <att name="lockedVisualProperties" type="list" cy:type="List">
        <att name="NODE_LABEL" value="" type="string" cy:type="String"/>
      </att>
    </graphics>
  </node>
  <node id="45095" label="ENSMUSG00000021364" cy:nodeId="1324">
    <graphics z="0.0" y="-246.20343715332183" x="172.86006012121788">
      <att name="lockedVisualProperties" type="list" cy:type="List">
        <att name="NODE_LABEL" value="" type="string" cy:type="String"/>
      </att>
    </graphics>
  </node>
  <node id="45094" label="ENSMUSG00000021453" cy:nodeId="1325">
    <graphics z="0.0" y="-160.65708858154449" x="27.095310832658924">
      <att name="lockedVisualProperties" type="list" cy:type="List">
        <att name="NODE_LABEL" value="" type="string" cy:type="String"/>
      </att>
    </graphics>
  </node>
  <node id="45093" label="ENSMUSG00000021509" cy:nodeId="1326">
    <graphics z="0.0" y="447.93044346191255" x="89.00540604750267">
      <att name="lockedVisualProperties" type="list" cy:type="List">
        <att name="NODE_LABEL" value="" type="string" cy:type="String"/>
      </att>
    </graphics>
  </node>
  <node id="45092" label="ENSMUSG00000021553" cy:nodeId="1327">
    <graphics z="0.0" y="439.31337803222505" x="29.5320478932058">
      <att name="lockedVisualProperties" type="list" cy:type="List">
        <att name="NODE_LABEL" value="" type="string" cy:type="String"/>
      </att>
    </graphics>
  </node>
  <node id="45091" label="ENSMUSG00000021559" cy:nodeId="1328">
    <graphics z="0.0" y="-227.5003274121109" x="-21.936488483747326">
      <att name="lockedVisualProperties" type="list" cy:type="List">
        <att name="NODE_LABEL" value="" type="string" cy:type="String"/>
      </att>
    </graphics>
  </node>
  <node id="45090" label="ENSMUSG00000021587" cy:nodeId="1329">
    <graphics z="0.0" y="225.04909580566255" x="-310.0389970286692">
      <att name="lockedVisualProperties" type="list" cy:type="List">
        <att name="NODE_LABEL" value="" type="string" cy:type="String"/>
      </att>
    </graphics>
  </node>
  <node id="45089" label="ENSMUSG00000021608" cy:nodeId="1330">
    <graphics z="0.0" y="164.24463718749848" x="-181.46767744859108">
      <att name="lockedVisualProperties" type="list" cy:type="List">
        <att name="NODE_LABEL" value="" type="string" cy:type="String"/>
      </att>
    </graphics>
  </node>
  <node id="45088" label="ENSMUSG00000021609" cy:nodeId="1331">
    <graphics z="0.0" y="-26.572035137635794" x="401.73711075941674">
      <att name="lockedVisualProperties" type="list" cy:type="List">
        <att name="NODE_LABEL" value="" type="string" cy:type="String"/>
      </att>
    </graphics>
  </node>
  <node id="45087" label="ENSMUSG00000021640" cy:nodeId="1332">
    <graphics z="0.0" y="354.06252354003755" x="-128.21877608140358">
      <att name="lockedVisualProperties" type="list" cy:type="List">
        <att name="NODE_LABEL" value="" type="string" cy:type="String"/>
      </att>
    </graphics>
  </node>
  <node id="45086" label="ENSMUSG00000021684" cy:nodeId="1333">
    <graphics z="0.0" y="-217.70123988769683" x="42.22534623304955">
      <att name="lockedVisualProperties" type="list" cy:type="List">
        <att name="NODE_LABEL" value="" type="string" cy:type="String"/>
      </att>
    </graphics>
  </node>
  <node id="45085" label="ENSMUSG00000021685" cy:nodeId="1334">
    <graphics z="0.0" y="141.8763815722641" x="79.87700333754174">
      <att name="lockedVisualProperties" type="list" cy:type="List">
        <att name="NODE_LABEL" value="" type="string" cy:type="String"/>
      </att>
    </graphics>
  </node>
  <node id="45084" label="ENSMUSG00000021700" cy:nodeId="1335">
    <graphics z="0.0" y="-287.92177516601714" x="72.0150572315847">
      <att name="lockedVisualProperties" type="list" cy:type="List">
        <att name="NODE_LABEL" value="" type="string" cy:type="String"/>
      </att>
    </graphics>
  </node>
  <node id="45083" label="ENSMUSG00000021728" cy:nodeId="1336">
    <graphics z="0.0" y="135.1060416064438" x="354.05676713148705">
      <att name="lockedVisualProperties" type="list" cy:type="List">
        <att name="NODE_LABEL" value="" type="string" cy:type="String"/>
      </att>
    </graphics>
  </node>
  <node id="45082" label="ENSMUSG00000021733" cy:nodeId="1337">
    <graphics z="0.0" y="-104.17758113525542" x="-187.1882890208567">
      <att name="lockedVisualProperties" type="list" cy:type="List">
        <att name="NODE_LABEL" value="" type="string" cy:type="String"/>
      </att>
    </graphics>
  </node>
  <node id="45081" label="ENSMUSG00000021763" cy:nodeId="1338">
    <graphics z="0.0" y="1.603996928709421" x="-331.0802262767161">
      <att name="lockedVisualProperties" type="list" cy:type="List">
        <att name="NODE_LABEL" value="" type="string" cy:type="String"/>
      </att>
    </graphics>
  </node>
  <node id="45080" label="ENSMUSG00000021798" cy:nodeId="1339">
    <graphics z="0.0" y="152.5636374316391" x="-154.49434981187233">
      <att name="lockedVisualProperties" type="list" cy:type="List">
        <att name="NODE_LABEL" value="" type="string" cy:type="String"/>
      </att>
    </graphics>
  </node>
  <node id="45079" label="ENSMUSG00000021803" cy:nodeId="1340">
    <graphics z="0.0" y="418.5403677783188" x="214.32727494398705">
      <att name="lockedVisualProperties" type="list" cy:type="List">
        <att name="NODE_LABEL" value="" type="string" cy:type="String"/>
      </att>
    </graphics>
  </node>
  <node id="45078" label="ENSMUSG00000021838" cy:nodeId="1341">
    <graphics z="0.0" y="-106.48083430908355" x="183.91061844984642">
      <att name="lockedVisualProperties" type="list" cy:type="List">
        <att name="NODE_LABEL" value="" type="string" cy:type="String"/>
      </att>
    </graphics>
  </node>
  <node id="45077" label="ENSMUSG00000021904" cy:nodeId="1342">
    <graphics z="0.0" y="-137.2501824536148" x="-420.2782243235911">
      <att name="lockedVisualProperties" type="list" cy:type="List">
        <att name="NODE_LABEL" value="" type="string" cy:type="String"/>
      </att>
    </graphics>
  </node>
  <node id="45076" label="ENSMUSG00000021913" cy:nodeId="1343">
    <graphics z="0.0" y="28.94187992431489" x="-60.837977741559826">
      <att name="lockedVisualProperties" type="list" cy:type="List">
        <att name="NODE_LABEL" value="" type="string" cy:type="String"/>
      </att>
    </graphics>
  </node>
  <node id="45075" label="ENSMUSG00000021928" cy:nodeId="1344">
    <graphics z="0.0" y="195.87694614745942" x="-219.73290572007545">
      <att name="lockedVisualProperties" type="list" cy:type="List">
        <att name="NODE_LABEL" value="" type="string" cy:type="String"/>
      </att>
    </graphics>
  </node>
  <node id="45074" label="ENSMUSG00000021944" cy:nodeId="1345">
[truncated: 560,799 more chars]
