# Supplementary material for: Regulatory network analysis of Paneth cell and goblet cell enriched gut organoids using transcriptomics approaches
Source: Royal Society of Chemistry journal article supplement (doi:10.1039/c9mo00130a), 2019-12-10
Supplement: c9mo00130a1.cys [file c9mo00130a1.cys › CytoscapeSession-2019_09_26-22_01/views/40195-85721-1%3A+Cluster+1+%28Score%3A+17.048%29.xgmml]

<?xml version="1.0" encoding="UTF-8" standalone="yes"?>
<graph id="85721" label="85721" cy:view="1" cy:networkId="40195" cy:visualStyle="default" cy:rendererId="org.cytoscape.ding" cy:documentVersion="3.0" xmlns:dc="http://purl.org/dc/elements/1.1/" xmlns:xlink="http://www.w3.org/1999/xlink" xmlns:rdf="http://www.w3.org/1999/02/22-rdf-syntax-ns#" xmlns:cy="http://www.cytoscape.org" xmlns="http://www.cs.rpi.edu/XGMML">
  <graphics>
    <att name="NETWORK_CENTER_X_LOCATION" value="119.62464141845703" type="string" cy:type="String"/>
    <att name="NETWORK_SCALE_FACTOR" value="0.9072542213564994" type="string" cy:type="String"/>
    <att name="NETWORK_NODE_SELECTION" value="true" type="string" cy:type="String"/>
    <att name="NETWORK_TITLE" value="" type="string" cy:type="String"/>
    <att name="NETWORK_HEIGHT" value="510.0" type="string" cy:type="String"/>
    <att name="NETWORK_CENTER_Z_LOCATION" value="0.0" type="string" cy:type="String"/>
    <att name="NETWORK_EDGE_SELECTION" value="true" type="string" cy:type="String"/>
    <att name="NETWORK_DEPTH" value="0.0" type="string" cy:type="String"/>
    <att name="NETWORK_CENTER_Y_LOCATION" value="11.663467407226562" type="string" cy:type="String"/>
    <att name="NETWORK_WIDTH" value="658.0" type="string" cy:type="String"/>
    <att name="NETWORK_ANNOTATION_SELECTION" value="false" type="string" cy:type="String"/>
  </graphics>
  <node id="85784" label="ENSMUSG00000025584" cy:nodeId="367">
    <graphics z="0.0" y="22.209182739257812" x="369.82586669921875">
      <att name="lockedVisualProperties" type="list" cy:type="List">
        <att name="NODE_LABEL" value="" type="string" cy:type="String"/>
        <att name="NODE_LABEL_COLOR" value="#FFFFFF" type="string" cy:type="String"/>
      </att>
    </graphics>
  </node>
  <node id="85785" label="ENSMUSG00000025969" cy:nodeId="375">
    <graphics z="0.0" y="241.8863525390625" x="-30.559127807617188">
      <att name="lockedVisualProperties" type="list" cy:type="List">
        <att name="NODE_LABEL" value="" type="string" cy:type="String"/>
        <att name="NODE_LABEL_COLOR" value="#FFFFFF" type="string" cy:type="String"/>
      </att>
    </graphics>
  </node>
  <node id="85786" label="ENSMUSG00000020897" cy:nodeId="248">
    <graphics z="0.0" y="114.61973571777344" x="296.424072265625">
      <att name="lockedVisualProperties" type="list" cy:type="List">
        <att name="NODE_LABEL" value="" type="string" cy:type="String"/>
        <att name="NODE_LABEL_COLOR" value="#FFFFFF" type="string" cy:type="String"/>
      </att>
    </graphics>
  </node>
  <node id="85787" label="ENSMUSG00000019982" cy:nodeId="1272">
    <graphics z="0.0" y="64.23365020751953" x="10.992431640625">
      <att name="lockedVisualProperties" type="list" cy:type="List">
        <att name="NODE_LABEL" value="" type="string" cy:type="String"/>
        <att name="NODE_LABEL_COLOR" value="#FFFFFF" type="string" cy:type="String"/>
      </att>
    </graphics>
  </node>
  <node id="85788" label="ENSMUSG00000037679" cy:nodeId="634">
    <graphics z="0.0" y="111.57357788085938" x="-94.84913635253906">
      <att name="lockedVisualProperties" type="list" cy:type="List">
        <att name="NODE_LABEL" value="" type="string" cy:type="String"/>
        <att name="NODE_LABEL_COLOR" value="#FFFFFF" type="string" cy:type="String"/>
      </att>
    </graphics>
  </node>
  <node id="85789" label="ENSMUSG00000026494" cy:nodeId="1530">
    <graphics z="0.0" y="-276.43798828125" x="145.61322021484375">
      <att name="lockedVisualProperties" type="list" cy:type="List">
        <att name="NODE_LABEL" value="" type="string" cy:type="String"/>
        <att name="NODE_LABEL_COLOR" value="#FFFFFF" type="string" cy:type="String"/>
      </att>
    </graphics>
  </node>
  <node id="85790" label="ENSMUSG00000026278" cy:nodeId="382">
    <graphics z="0.0" y="-225.23724365234375" x="107.70062255859375">
      <att name="lockedVisualProperties" type="list" cy:type="List">
        <att name="NODE_LABEL" value="" type="string" cy:type="String"/>
        <att name="NODE_LABEL_COLOR" value="#FFFFFF" type="string" cy:type="String"/>
      </att>
    </graphics>
  </node>
  <node id="85791" label="ENSMUSG00000029761" cy:nodeId="1662">
    <graphics z="0.0" y="303.6357116699219" x="140.4849395751953">
      <att name="lockedVisualProperties" type="list" cy:type="List">
        <att name="NODE_LABEL" value="" type="string" cy:type="String"/>
        <att name="NODE_LABEL_COLOR" value="#FFFFFF" type="string" cy:type="String"/>
      </att>
    </graphics>
  </node>
  <node id="85792" label="ENSMUSG00000031629" cy:nodeId="512">
    <graphics z="0.0" y="265.8641357421875" x="215.96939086914062">
      <att name="lockedVisualProperties" type="list" cy:type="List">
        <att name="NODE_LABEL" value="" type="string" cy:type="String"/>
        <att name="NODE_LABEL_COLOR" value="#FFFFFF" type="string" cy:type="String"/>
      </att>
    </graphics>
  </node>
  <node id="85793" label="ENSMUSG00000037946" cy:nodeId="641">
    <graphics z="0.0" y="-222.7044219970703" x="201.3375244140625">
      <att name="lockedVisualProperties" type="list" cy:type="List">
        <att name="NODE_LABEL" value="" type="string" cy:type="String"/>
        <att name="NODE_LABEL_COLOR" value="#FFFFFF" type="string" cy:type="String"/>
      </att>
    </graphics>
  </node>
  <node id="85794" label="ENSMUSG00000020218" cy:nodeId="1281">
    <graphics z="0.0" y="53.25181579589844" x="-145.17822265625">
      <att name="lockedVisualProperties" type="list" cy:type="List">
        <att name="NODE_LABEL" value="" type="string" cy:type="String"/>
        <att name="NODE_LABEL_COLOR" value="#FFFFFF" type="string" cy:type="String"/>
      </att>
    </graphics>
  </node>
  <node id="85795" label="ENSMUSG00000046711" cy:nodeId="771">
    <graphics z="0.0" y="-230.3247528076172" x="-44.46897888183594">
      <att name="lockedVisualProperties" type="list" cy:type="List">
        <att name="NODE_LABEL" value="" type="string" cy:type="String"/>
        <att name="NODE_LABEL_COLOR" value="#FFFFFF" type="string" cy:type="String"/>
      </att>
    </graphics>
  </node>
  <node id="85796" label="ENSMUSG00000031788" cy:nodeId="516">
    <graphics z="0.0" y="-180.6217803955078" x="157.70858764648438">
      <att name="lockedVisualProperties" type="list" cy:type="List">
        <att name="NODE_LABEL" value="" type="string" cy:type="String"/>
        <att name="NODE_LABEL_COLOR" value="#FFFFFF" type="string" cy:type="String"/>
      </att>
    </graphics>
  </node>
  <node id="85797" label="ENSMUSG00000033545" cy:nodeId="1799">
    <graphics z="0.0" y="267.6054992675781" x="148.21762084960938">
      <att name="lockedVisualProperties" type="list" cy:type="List">
        <att name="NODE_LABEL" value="" type="string" cy:type="String"/>
        <att name="NODE_LABEL_COLOR" value="#FFFFFF" type="string" cy:type="String"/>
      </att>
    </graphics>
  </node>
  <node id="85798" label="ENSMUSG00000021701" cy:nodeId="264">
    <graphics z="0.0" y="-199.69189453125" x="26.36333465576172">
      <att name="lockedVisualProperties" type="list" cy:type="List">
        <att name="NODE_LABEL" value="" type="string" cy:type="String"/>
        <att name="NODE_LABEL_COLOR" value="#FFFFFF" type="string" cy:type="String"/>
      </att>
    </graphics>
  </node>
  <node id="85799" label="ENSMUSG00000021725" cy:nodeId="265">
    <graphics z="0.0" y="190.60523986816406" x="131.43991088867188">
      <att name="lockedVisualProperties" type="list" cy:type="List">
        <att name="NODE_LABEL" value="" type="string" cy:type="String"/>
        <att name="NODE_LABEL_COLOR" value="#FFFFFF" type="string" cy:type="String"/>
      </att>
    </graphics>
  </node>
  <node id="85800" label="ENSMUSG00000047534" cy:nodeId="778">
    <graphics z="0.0" y="177.1296844482422" x="261.1632385253906">
      <att name="lockedVisualProperties" type="list" cy:type="List">
        <att name="NODE_LABEL" value="" type="string" cy:type="String"/>
        <att name="NODE_LABEL_COLOR" value="#FFFFFF" type="string" cy:type="String"/>
      </att>
    </graphics>
  </node>
  <node id="85801" label="ENSMUSG00000030353" cy:nodeId="1681">
    <graphics z="0.0" y="45.167686462402344" x="121.43963623046875">
      <att name="lockedVisualProperties" type="list" cy:type="List">
        <att name="NODE_LABEL" value="" type="string" cy:type="String"/>
        <att name="NODE_LABEL_COLOR" value="#FFFFFF" type="string" cy:type="String"/>
      </att>
    </graphics>
  </node>
  <node id="85802" label="ENSMUSG00000065952" cy:nodeId="914">
    <graphics z="0.0" y="-26.110790252685547" x="299.9439697265625">
      <att name="lockedVisualProperties" type="list" cy:type="List">
        <att name="NODE_LABEL" value="" type="string" cy:type="String"/>
        <att name="NODE_LABEL_COLOR" value="#FFFFFF" type="string" cy:type="String"/>
      </att>
    </graphics>
  </node>
  <node id="85803" label="ENSMUSG00000066026" cy:nodeId="915">
    <graphics z="0.0" y="186.53424072265625" x="64.49468231201172">
      <att name="lockedVisualProperties" type="list" cy:type="List">
        <att name="NODE_LABEL" value="" type="string" cy:type="String"/>
        <att name="NODE_LABEL_COLOR" value="#FFFFFF" type="string" cy:type="String"/>
      </att>
    </graphics>
  </node>
  <node id="85804" label="ENSMUSG00000027326" cy:nodeId="408">
    <graphics z="0.0" y="-0.23465919494628906" x="-142.61009216308594">
      <att name="lockedVisualProperties" type="list" cy:type="List">
        <att name="NODE_LABEL" value="" type="string" cy:type="String"/>
        <att name="NODE_LABEL_COLOR" value="#FFFFFF" type="string" cy:type="String"/>
      </att>
    </graphics>
  </node>
  <node id="85805" label="ENSMUSG00000022265" cy:nodeId="284">
    <graphics z="0.0" y="-270.5575256347656" x="15.911739349365234">
      <att name="lockedVisualProperties" type="list" cy:type="List">
        <att name="NODE_LABEL" value="" type="string" cy:type="String"/>
        <att name="NODE_LABEL_COLOR" value="#FFFFFF" type="string" cy:type="String"/>
      </att>
    </graphics>
  </node>
  <node id="85806" label="ENSMUSG00000004709" cy:nodeId="1181">
    <graphics z="0.0" y="-132.77853393554688" x="-126.02938842773438">
      <att name="lockedVisualProperties" type="list" cy:type="List">
        <att name="NODE_LABEL" value="" type="string" cy:type="String"/>
        <att name="NODE_LABEL_COLOR" value="#FFFFFF" type="string" cy:type="String"/>
      </att>
    </graphics>
  </node>
  <node id="85807" label="ENSMUSG00000022543" cy:nodeId="288">
    <graphics z="0.0" y="-252.36468505859375" x="145.84373474121094">
      <att name="lockedVisualProperties" type="list" cy:type="List">
        <att name="NODE_LABEL" value="" type="string" cy:type="String"/>
        <att name="NODE_LABEL_COLOR" value="#FFFFFF" type="string" cy:type="String"/>
      </att>
    </graphics>
  </node>
  <node id="85724" label="ENSMUSG00000039952" cy:nodeId="1956">
    <graphics z="0.0" y="221.97511291503906" x="11.249374389648438">
      <att name="lockedVisualProperties" type="list" cy:type="List">
        <att name="NODE_LABEL" value="" type="string" cy:type="String"/>
        <att name="NODE_LABEL_COLOR" value="#FFFFFF" type="string" cy:type="String"/>
      </att>
    </graphics>
  </node>
  <node id="85723" label="ENSMUSG00000039813" cy:nodeId="676">
    <graphics z="0.0" y="-91.64408111572266" x="-61.45329284667969">
      <att name="lockedVisualProperties" type="list" cy:type="List">
        <att name="NODE_LABEL" value="" type="string" cy:type="String"/>
        <att name="NODE_LABEL_COLOR" value="#FFFFFF" type="string" cy:type="String"/>
      </att>
    </graphics>
  </node>
  <node id="85725" label="ENSMUSG00000049866" cy:nodeId="805">
    <graphics z="0.0" y="57.587120056152344" x="-107.982177734375">
      <att name="lockedVisualProperties" type="list" cy:type="List">
        <att name="NODE_LABEL" value="" type="string" cy:type="String"/>
        <att name="NODE_LABEL_COLOR" value="#FFFFFF" type="string" cy:type="String"/>
      </att>
    </graphics>
  </node>
  <node id="85726" label="ENSMUSG00000039967" cy:nodeId="1957">
    <graphics z="0.0" y="-176.93228149414062" x="350.0092468261719">
      <att name="lockedVisualProperties" type="list" cy:type="List">
        <att name="NODE_LABEL" value="" type="string" cy:type="String"/>
        <att name="NODE_LABEL_COLOR" value="#FFFFFF" type="string" cy:type="String"/>
      </att>
    </graphics>
  </node>
  <node id="85727" label="ENSMUSG00000021226" cy:nodeId="1321">
    <graphics z="0.0" y="153.50657653808594" x="-107.73216247558594">
      <att name="lockedVisualProperties" type="list" cy:type="List">
        <att name="NODE_LABEL" value="" type="string" cy:type="String"/>
        <att name="NODE_LABEL_COLOR" value="#FFFFFF" type="string" cy:type="String"/>
      </att>
    </graphics>
  </node>
  <node id="85729" label="ENSMUSG00000085024" cy:nodeId="2730">
    <graphics z="0.0" y="183.99026489257812" x="311.81231689453125">
      <att name="lockedVisualProperties" type="list" cy:type="List">
        <att name="NODE_LABEL" value="" type="string" cy:type="String"/>
        <att name="NODE_LABEL_COLOR" value="#FFFFFF" type="string" cy:type="String"/>
      </att>
    </graphics>
  </node>
  <node id="85728" label="ENSMUSG00000011752" cy:nodeId="170">
    <graphics z="0.0" y="-273.1051025390625" x="75.40185546875">
      <att name="lockedVisualProperties" type="list" cy:type="List">
        <att name="NODE_LABEL" value="" type="string" cy:type="String"/>
        <att name="NODE_LABEL_COLOR" value="#FFFFFF" type="string" cy:type="String"/>
      </att>
    </graphics>
  </node>
  <node id="85730" label="ENSMUSG00000023004" cy:nodeId="303">
    <graphics z="0.0" y="43.66902160644531" x="290.4080810546875">
      <att name="lockedVisualProperties" type="list" cy:type="List">
        <att name="NODE_LABEL" value="" type="string" cy:type="String"/>
        <att name="NODE_LABEL_COLOR" value="#FFFFFF" type="string" cy:type="String"/>
      </att>
    </graphics>
  </node>
  <node id="85731" label="ENSMUSG00000014361" cy:nodeId="177">
    <graphics z="0.0" y="-82.41241455078125" x="402.5662841796875">
      <att name="lockedVisualProperties" type="list" cy:type="List">
        <att name="NODE_LABEL" value="" type="string" cy:type="String"/>
        <att name="NODE_LABEL_COLOR" value="#FFFFFF" type="string" cy:type="String"/>
      </att>
    </graphics>
  </node>
  <node id="85732" label="ENSMUSG00000023809" cy:nodeId="314">
    <graphics z="0.0" y="185.9597930908203" x="353.96868896484375">
      <att name="lockedVisualProperties" type="list" cy:type="List">
        <att name="NODE_LABEL" value="" type="string" cy:type="String"/>
        <att name="NODE_LABEL_COLOR" value="#FFFFFF" type="string" cy:type="String"/>
      </att>
    </graphics>
  </node>
  <node id="85733" label="ENSMUSG00000052392" cy:nodeId="826">
    <graphics z="0.0" y="-87.34535217285156" x="239.14498901367188">
      <att name="lockedVisualProperties" type="list" cy:type="List">
        <att name="NODE_LABEL" value="" type="string" cy:type="String"/>
        <att name="NODE_LABEL_COLOR" value="#FFFFFF" type="string" cy:type="String"/>
      </att>
    </graphics>
  </node>
  <node id="85734" label="ENSMUSG00000041075" cy:nodeId="700">
    <graphics z="0.0" y="-111.567626953125" x="327.18505859375">
      <att name="lockedVisualProperties" type="list" cy:type="List">
        <att name="NODE_LABEL" value="" type="string" cy:type="String"/>
        <att name="NODE_LABEL_COLOR" value="#FFFFFF" type="string" cy:type="String"/>
      </att>
    </graphics>
  </node>
  <node id="85735" label="ENSMUSG00000010663" cy:nodeId="1212">
    <graphics z="0.0" y="219.61029052734375" x="-80.73676300048828">
      <att name="lockedVisualProperties" type="list" cy:type="List">
        <att name="NODE_LABEL" value="" type="string" cy:type="String"/>
        <att name="NODE_LABEL_COLOR" value="#FFFFFF" type="string" cy:type="String"/>
      </att>
    </graphics>
  </node>
  <node id="85736" label="ENSMUSG00000023940" cy:nodeId="318">
    <graphics z="0.0" y="-202.06027221679688" x="-37.54142761230469">
      <att name="lockedVisualProperties" type="list" cy:type="List">
        <att name="NODE_LABEL" value="" type="string" cy:type="String"/>
        <att name="NODE_LABEL_COLOR" value="#FFFFFF" type="string" cy:type="String"/>
      </att>
    </graphics>
  </node>
  <node id="85737" label="ENSMUSG00000041143" cy:nodeId="704">
    <graphics z="0.0" y="-243.98458862304688" x="225.50076293945312">
      <att name="lockedVisualProperties" type="list" cy:type="List">
        <att name="NODE_LABEL" value="" type="string" cy:type="String"/>
        <att name="NODE_LABEL_COLOR" value="#FFFFFF" type="string" cy:type="String"/>
      </att>
    </graphics>
  </node>
  <node id="85738" label="ENSMUSG00000028849" cy:nodeId="454">
    <graphics z="0.0" y="147.65786743164062" x="231.7037353515625">
      <att name="lockedVisualProperties" type="list" cy:type="List">
        <att name="NODE_LABEL" value="" type="string" cy:type="String"/>
        <att name="NODE_LABEL_COLOR" value="#FFFFFF" type="string" cy:type="String"/>
      </att>
    </graphics>
  </node>
  <node id="85739" label="ENSMUSG00000034781" cy:nodeId="583">
    <graphics z="0.0" y="-100.52349090576172" x="274.4652099609375">
      <att name="lockedVisualProperties" type="list" cy:type="List">
        <att name="NODE_LABEL" value="" type="string" cy:type="String"/>
        <att name="NODE_LABEL_COLOR" value="#FFFFFF" type="string" cy:type="String"/>
      </att>
    </graphics>
  </node>
  <node id="85740" label="ENSMUSG00000017724" cy:nodeId="200">
    <graphics z="0.0" y="226.49058532714844" x="275.049560546875">
      <att name="lockedVisualProperties" type="list" cy:type="List">
        <att name="NODE_LABEL" value="" type="string" cy:type="String"/>
        <att name="NODE_LABEL_COLOR" value="#FFFFFF" type="string" cy:type="String"/>
      </att>
    </graphics>
  </node>
  <node id="85741" label="ENSMUSG00000015846" cy:nodeId="74">
    <graphics z="0.0" y="-23.145362854003906" x="127.96977233886719">
      <att name="lockedVisualProperties" type="list" cy:type="List">
        <att name="NODE_LABEL" value="" type="string" cy:type="String"/>
        <att name="NODE_LABEL_COLOR" value="#FFFFFF" type="string" cy:type="String"/>
      </att>
    </graphics>
  </node>
  <node id="85742" label="ENSMUSG00000029095" cy:nodeId="459">
    <graphics z="0.0" y="240.79656982421875" x="174.3179168701172">
      <att name="lockedVisualProperties" type="list" cy:type="List">
        <att name="NODE_LABEL" value="" type="string" cy:type="String"/>
        <att name="NODE_LABEL_COLOR" value="#FFFFFF" type="string" cy:type="String"/>
      </att>
    </graphics>
  </node>
  <node id="85743" label="ENSMUSG00000035164" cy:nodeId="588">
    <graphics z="0.0" y="114.65592956542969" x="-36.38494110107422">
      <att name="lockedVisualProperties" type="list" cy:type="List">
        <att name="NODE_LABEL" value="" type="string" cy:type="String"/>
        <att name="NODE_LABEL_COLOR" value="#FFFFFF" type="string" cy:type="String"/>
      </att>
    </graphics>
  </node>
  <node id="85744" label="ENSMUSG00000054342" cy:nodeId="844">
    <graphics z="0.0" y="-219.71424865722656" x="285.0518493652344">
      <att name="lockedVisualProperties" type="list" cy:type="List">
        <att name="NODE_LABEL" value="" type="string" cy:type="String"/>
        <att name="NODE_LABEL_COLOR" value="#FFFFFF" type="string" cy:type="String"/>
      </att>
    </graphics>
  </node>
  <node id="85745" label="ENSMUSG00000048895" cy:nodeId="1100">
    <graphics z="0.0" y="259.98681640625" x="28.697250366210938">
      <att name="lockedVisualProperties" type="list" cy:type="List">
        <att name="NODE_LABEL" value="" type="string" cy:type="String"/>
        <att name="NODE_LABEL_COLOR" value="#FFFFFF" type="string" cy:type="String"/>
      </att>
    </graphics>
  </node>
  <node id="85746" label="ENSMUSG00000022383" cy:nodeId="76">
    <graphics z="0.0" y="-34.37001419067383" x="104.24496459960938">
      <att name="lockedVisualProperties" type="list" cy:type="List">
        <att name="NODE_LABEL" value="" type="string" cy:type="String"/>
        <att name="NODE_LABEL_COLOR" value="#FFFFFF" type="string" cy:type="String"/>
      </att>
    </graphics>
  </node>
  <node id="85747" label="ENSMUSG00000018593" cy:nodeId="205">
    <graphics z="0.0" y="274.031494140625" x="278.2110290527344">
      <att name="lockedVisualProperties" type="list" cy:type="List">
        <att name="NODE_LABEL" value="" type="string" cy:type="String"/>
        <att name="NODE_LABEL_COLOR" value="#FFFFFF" type="string" cy:type="String"/>
      </att>
    </graphics>
  </node>
  <node id="85748" label="ENSMUSG00000018740" cy:nodeId="206">
    <graphics z="0.0" y="-114.18412780761719" x="369.0862121582031">
      <att name="lockedVisualProperties" type="list" cy:type="List">
        <att name="NODE_LABEL" value="" type="string" cy:type="String"/>
        <att name="NODE_LABEL_COLOR" value="#FFFFFF" type="string" cy:type="String"/>
      </att>
    </graphics>
  </node>
  <node id="85749" label="ENSMUSG00000049807" cy:nodeId="2126">
    <graphics z="0.0" y="-173.24703979492188" x="106.19027709960938">
      <att name="lockedVisualProperties" type="list" cy:type="List">
        <att name="NODE_LABEL" value="" type="string" cy:type="String"/>
        <att name="NODE_LABEL_COLOR" value="#FFFFFF" type="string" cy:type="String"/>
      </att>
    </graphics>
  </node>
  <node id="85750" label="ENSMUSG00000024556" cy:nodeId="335">
    <graphics z="0.0" y="185.15316772460938" x="184.53370666503906">
      <att name="lockedVisualProperties" type="list" cy:type="List">
        <att name="NODE_LABEL" value="" type="string" cy:type="String"/>
        <att name="NODE_LABEL_COLOR" value="#FFFFFF" type="string" cy:type="String"/>
      </att>
    </graphics>
  </node>
  <node id="85751" label="ENSMUSG00000054717" cy:nodeId="847">
    <graphics z="0.0" y="265.46783447265625" x="57.512977600097656">
      <att name="lockedVisualProperties" type="list" cy:type="List">
        <att name="NODE_LABEL" value="" type="string" cy:type="String"/>
        <att name="NODE_LABEL_COLOR" value="#FFFFFF" type="string" cy:type="String"/>
      </att>
    </graphics>
  </node>
  <node id="85752" label="ENSMUSG00000024431" cy:nodeId="79">
    <graphics z="0.0" y="-28.88351821899414" x="152.7875518798828">
      <att name="lockedVisualProperties" type="list" cy:type="List">
        <att name="NODE_LABEL" value="" type="string" cy:type="String"/>
        <att name="NODE_LABEL_COLOR" value="#FFFFFF" type="string" cy:type="String"/>
      </att>
    </graphics>
  </node>
  <node id="85753" label="ENSMUSG00000024590" cy:nodeId="336">
    <graphics z="0.0" y="4.480607986450195" x="403.7990417480469">
      <att name="lockedVisualProperties" type="list" cy:type="List">
        <att name="NODE_LABEL" value="" type="string" cy:type="String"/>
        <att name="NODE_LABEL_COLOR" value="#FFFFFF" type="string" cy:type="String"/>
      </att>
    </graphics>
  </node>
  <node id="85754" label="ENSMUSG00000031987" cy:nodeId="1744">
    <graphics z="0.0" y="46.12925720214844" x="-65.57693481445312">
      <att name="lockedVisualProperties" type="list" cy:type="List">
        <att name="NODE_LABEL" value="" type="string" cy:type="String"/>
        <att name="NODE_LABEL_COLOR" value="#FFFFFF" type="string" cy:type="String"/>
      </att>
    </graphics>
  </node>
  <node id="85755" label="ENSMUSG00000029167" cy:nodeId="82">
    <graphics z="0.0" y="119.50872802734375" x="337.8236999511719">
      <att name="lockedVisualProperties" type="list" cy:type="List">
        <att name="NODE_LABEL" value="" type="string" cy:type="String"/>
        <att name="NODE_LABEL_COLOR" value="#FFFFFF" type="string" cy:type="String"/>
      </att>
    </graphics>
  </node>
  <node id="85756" label="ENSMUSG00000098557" cy:nodeId="980">
    <graphics z="0.0" y="-54.353904724121094" x="357.5916748046875">
      <att name="lockedVisualProperties" type="list" cy:type="List">
        <att name="NODE_LABEL" value="" type="string" cy:type="String"/>
        <att name="NODE_LABEL_COLOR" value="#FFFFFF" type="string" cy:type="String"/>
      </att>
    </graphics>
  </node>
  <node id="85757" label="ENSMUSG00000072620" cy:nodeId="1109">
    <graphics z="0.0" y="-32.73875427246094" x="-104.4542236328125">
      <att name="lockedVisualProperties" type="list" cy:type="List">
        <att name="NODE_LABEL" value="" type="string" cy:type="String"/>
        <att name="NODE_LABEL_COLOR" value="#FFFFFF" type="string" cy:type="String"/>
      </att>
    </graphics>
  </node>
  <node id="85758" label="ENSMUSG00000020889" cy:nodeId="85">
    <graphics z="0.0" y="20.094165802001953" x="154.50537109375">
      <att name="lockedVisualProperties" type="list" cy:type="List">
        <att name="NODE_LABEL" value="" type="string" cy:type="String"/>
        <att name="NODE_LABEL_COLOR" value="#FFFFFF" type="string" cy:type="String"/>
      </att>
    </graphics>
  </node>
  <node id="85759" label="ENSMUSG00000018899" cy:nodeId="86">
    <graphics z="0.0" y="12.869804382324219" x="89.35537719726562">
      <att name="lockedVisualProperties" type="list" cy:type="List">
        <att name="NODE_LABEL" value="" type="string" cy:type="String"/>
        <att name="NODE_LABEL_COLOR" value="#FFFFFF" type="string" cy:type="String"/>
      </att>
    </graphics>
  </node>
  <node id="85760" label="ENSMUSG00000020184" cy:nodeId="87">
    <graphics z="0.0" y="-154.84852600097656" x="8.38043212890625">
      <att name="lockedVisualProperties" type="list" cy:type="List">
        <att name="NODE_LABEL" value="" type="string" cy:type="String"/>
        <att name="NODE_LABEL_COLOR" value="#FFFFFF" type="string" cy:type="String"/>
      </att>
    </graphics>
  </node>
  <node id="85761" label="ENSMUSG00000022105" cy:nodeId="89">
    <graphics z="0.0" y="234.49424743652344" x="95.838623046875">
      <att name="lockedVisualProperties" type="list" cy:type="List">
        <att name="NODE_LABEL" value="" type="string" cy:type="String"/>
        <att name="NODE_LABEL_COLOR" value="#FFFFFF" type="string" cy:type="String"/>
      </att>
    </graphics>
  </node>
  <node id="85762" label="ENSMUSG00000035900" cy:nodeId="601">
    <graphics z="0.0" y="-0.6666908264160156" x="-68.27362060546875">
      <att name="lockedVisualProperties" type="list" cy:type="List">
        <att name="NODE_LABEL" value="" type="string" cy:type="String"/>
        <att name="NODE_LABEL_COLOR" value="#FFFFFF" type="string" cy:type="String"/>
      </att>
    </graphics>
  </node>
  <node id="85763" label="ENSMUSG00000050395" cy:nodeId="2137">
    <graphics z="0.0" y="66.14713287353516" x="388.01220703125">
      <att name="lockedVisualProperties" type="list" cy:type="List">
        <att name="NODE_LABEL" value="" type="string" cy:type="String"/>
        <att name="NODE_LABEL_COLOR" value="#FFFFFF" type="string" cy:type="String"/>
      </att>
    </graphics>
  </node>
  <node id="85764" label="ENSMUSG00000042500" cy:nodeId="2011">
    <graphics z="0.0" y="-280.30877685546875" x="231.73577880859375">
      <att name="lockedVisualProperties" type="list" cy:type="List">
        <att name="NODE_LABEL" value="" type="string" cy:type="String"/>
        <att name="NODE_LABEL_COLOR" value="#FFFFFF" type="string" cy:type="String"/>
      </att>
    </graphics>
  </node>
  <node id="85765" label="ENSMUSG00000036036" cy:nodeId="603">
    <graphics z="0.0" y="-7.153074264526367" x="65.66874694824219">
      <att name="lockedVisualProperties" type="list" cy:type="List">
        <att name="NODE_LABEL" value="" type="string" cy:type="String"/>
        <att name="NODE_LABEL_COLOR" value="#FFFFFF" type="string" cy:type="String"/>
      </att>
    </graphics>
  </node>
  <node id="85766" label="ENSMUSG00000025903" cy:nodeId="1500">
    <graphics z="0.0" y="151.56240844726562" x="131.93258666992188">
      <att name="lockedVisualProperties" type="list" cy:type="List">
        <att name="NODE_LABEL" value="" type="string" cy:type="String"/>
        <att name="NODE_LABEL_COLOR" value="#FFFFFF" type="string" cy:type="String"/>
      </att>
    </graphics>
  </node>
  <node id="85767" label="ENSMUSG00000018143" cy:nodeId="1244">
    <graphics z="0.0" y="100.4569091796875" x="51.788787841796875">
      <att name="lockedVisualProperties" type="list" cy:type="List">
        <att name="NODE_LABEL" value="" type="string" cy:type="String"/>
        <att name="NODE_LABEL_COLOR" value="#FFFFFF" type="string" cy:type="String"/>
      </att>
    </graphics>
  </node>
  <node id="85768" label="ENSMUSG00000024912" cy:nodeId="94">
    <graphics z="0.0" y="-4.293848037719727" x="210.79856872558594">
      <att name="lockedVisualProperties" type="list" cy:type="List">
        <att name="NODE_LABEL" value="" type="string" cy:type="String"/>
        <att name="NODE_LABEL_COLOR" value="#FFFFFF" type="string" cy:type="String"/>
      </att>
    </graphics>
  </node>
  <node id="85769" label="ENSMUSG00000043419" cy:nodeId="736">
    <graphics z="0.0" y="220.65660095214844" x="217.73069763183594">
      <att name="lockedVisualProperties" type="list" cy:type="List">
        <att name="NODE_LABEL" value="" type="string" cy:type="String"/>
        <att name="NODE_LABEL_COLOR" value="#FFFFFF" type="string" cy:type="String"/>
      </att>
    </graphics>
  </node>
  <node id="85770" label="ENSMUSG00000051335" cy:nodeId="2148">
    <graphics z="0.0" y="36.42050552368164" x="332.2179260253906">
      <att name="lockedVisualProperties" type="list" cy:type="List">
        <att name="NODE_LABEL" value="" type="string" cy:type="String"/>
        <att name="NODE_LABEL_COLOR" value="#FFFFFF" type="string" cy:type="String"/>
      </att>
    </graphics>
  </node>
  <node id="85771" label="ENSMUSG00000020334" cy:nodeId="229">
    <graphics z="0.0" y="-80.6009521484375" x="-102.30404663085938">
      <att name="lockedVisualProperties" type="list" cy:type="List">
        <att name="NODE_LABEL" value="" type="string" cy:type="String"/>
        <att name="NODE_LABEL_COLOR" value="#FFFFFF" type="string" cy:type="String"/>
      </att>
    </graphics>
  </node>
  <node id="85772" label="ENSMUSG00000022528" cy:nodeId="101">
    <graphics z="0.0" y="-87.11844635009766" x="98.99609375">
      <att name="lockedVisualProperties" type="list" cy:type="List">
        <att name="NODE_LABEL" value="" type="string" cy:type="String"/>
        <att name="NODE_LABEL_COLOR" value="#FFFFFF" type="string" cy:type="String"/>
      </att>
    </graphics>
  </node>
  <node id="85773" label="ENSMUSG00000042816" cy:nodeId="2021">
    <graphics z="0.0" y="-168.60182189941406" x="222.1177978515625">
      <att name="lockedVisualProperties" type="list" cy:type="List">
        <att name="NODE_LABEL" value="" type="string" cy:type="String"/>
        <att name="NODE_LABEL_COLOR" value="#FFFFFF" type="string" cy:type="String"/>
      </att>
    </graphics>
  </node>
  <node id="85774" label="ENSMUSG00000042842" cy:nodeId="2022">
    <graphics z="0.0" y="98.9691390991211" x="209.2960205078125">
      <att name="lockedVisualProperties" type="list" cy:type="List">
        <att name="NODE_LABEL" value="" type="string" cy:type="String"/>
        <att name="NODE_LABEL_COLOR" value="#FFFFFF" type="string" cy:type="String"/>
      </att>
    </graphics>
  </node>
  <node id="85775" label="ENSMUSG00000034957" cy:nodeId="102">
    <graphics z="0.0" y="10.824586868286133" x="123.77613830566406">
      <att name="lockedVisualProperties" type="list" cy:type="List">
        <att name="NODE_LABEL" value="" type="string" cy:type="String"/>
        <att name="NODE_LABEL_COLOR" value="#FFFFFF" type="string" cy:type="String"/>
      </att>
    </graphics>
  </node>
  <node id="85776" label="ENSMUSG00000020387" cy:nodeId="232">
    <graphics z="0.0" y="-159.2779998779297" x="295.3305969238281">
      <att name="lockedVisualProperties" type="list" cy:type="List">
        <att name="NODE_LABEL" value="" type="string" cy:type="String"/>
        <att name="NODE_LABEL_COLOR" value="#FFFFFF" type="string" cy:type="String"/>
      </att>
    </graphics>
  </node>
  <node id="85777" label="ENSMUSG00000040249" cy:nodeId="105">
    <graphics z="0.0" y="102.60362243652344" x="-85.8510971069336">
      <att name="lockedVisualProperties" type="list" cy:type="List">
        <att name="NODE_LABEL" value="" type="string" cy:type="String"/>
        <att name="NODE_LABEL_COLOR" value="#FFFFFF" type="string" cy:type="String"/>
      </att>
    </graphics>
  </node>
  <node id="85778" label="ENSMUSG00000030747" cy:nodeId="490">
    <graphics z="0.0" y="90.87822723388672" x="-164.5497589111328">
      <att name="lockedVisualProperties" type="list" cy:type="List">
        <att name="NODE_LABEL" value="" type="string" cy:type="String"/>
        <att name="NODE_LABEL_COLOR" value="#FFFFFF" type="string" cy:type="String"/>
      </att>
    </graphics>
  </node>
  <node id="85779" label="ENSMUSG00000025545" cy:nodeId="365">
    <graphics z="0.0" y="-100.92205810546875" x="-15.075286865234375">
      <att name="lockedVisualProperties" type="list" cy:type="List">
        <att name="NODE_LABEL" value="" type="string" cy:type="String"/>
        <att name="NODE_LABEL_COLOR" value="#FFFFFF" type="string" cy:type="String"/>
      </att>
    </graphics>
  </node>
  <node id="85780" label="ENSMUSG00000045027" cy:nodeId="750">
    <graphics z="0.0" y="-156.23629760742188" x="-79.78076934814453">
      <att name="lockedVisualProperties" type="list" cy:type="List">
        <att name="NODE_LABEL" value="" type="string" cy:type="String"/>
        <att name="NODE_LABEL_COLOR" value="#FFFFFF" type="string" cy:type="String"/>
      </att>
    </graphics>
  </node>
  <node id="85781" label="ENSMUSG00000031004" cy:nodeId="494">
    <graphics z="0.0" y="-42.814674377441406" x="-161.56051635742188">
      <att name="lockedVisualProperties" type="list" cy:type="List">
        <att name="NODE_LABEL" value="" type="string" cy:type="String"/>
        <att name="NODE_LABEL_COLOR" value="#FFFFFF" type="string" cy:type="String"/>
      </att>
    </graphics>
  </node>
  <node id="85782" label="ENSMUSG00000037405" cy:nodeId="622">
    <graphics z="0.0" y="155.45343017578125" x="9.746162414550781">
      <att name="lockedVisualProperties" type="list" cy:type="List">
        <att name="NODE_LABEL" value="" type="string" cy:type="String"/>
        <att name="NODE_LABEL_COLOR" value="#FFFFFF" type="string" cy:type="String"/>
      </att>
    </graphics>
  </node>
  <node id="85783" label="ENSMUSG00000059013" cy:nodeId="878">
    <graphics z="0.0" y="106.14926147460938" x="378.75244140625">
      <att name="lockedVisualProperties" type="list" cy:type="List">
        <att name="NODE_LABEL" value="" type="string" cy:type="String"/>
        <att name="NODE_LABEL_COLOR" value="#FFFFFF" type="string" cy:type="String"/>
      </att>
    </graphics>
  </node>
</graph>
