# Supplementary material for: Regulatory network analysis of Paneth cell and goblet cell enriched gut organoids using transcriptomics approaches
Source: Royal Society of Chemistry journal article supplement (doi:10.1039/c9mo00130a), 2019-12-10
Supplement: c9mo00130a1.cys [file c9mo00130a1.cys › CytoscapeSession-2019_09_26-22_01/views/40205-40316-1%3A+Cluster+2+%28Score%3A+7.03%29.xgmml]

<?xml version="1.0" encoding="UTF-8" standalone="yes"?>
<graph id="40316" label="40316" cy:view="1" cy:networkId="40205" cy:visualStyle="default" cy:rendererId="org.cytoscape.ding" cy:documentVersion="3.0" xmlns:dc="http://purl.org/dc/elements/1.1/" xmlns:xlink="http://www.w3.org/1999/xlink" xmlns:rdf="http://www.w3.org/1999/02/22-rdf-syntax-ns#" xmlns:cy="http://www.cytoscape.org" xmlns="http://www.cs.rpi.edu/XGMML">
  <graphics>
    <att name="NETWORK_CENTER_X_LOCATION" value="251.7276153564453" type="string" cy:type="String"/>
    <att name="NETWORK_SCALE_FACTOR" value="0.6199889394570094" type="string" cy:type="String"/>
    <att name="NETWORK_NODE_SELECTION" value="true" type="string" cy:type="String"/>
    <att name="NETWORK_TITLE" value="" type="string" cy:type="String"/>
    <att name="NETWORK_HEIGHT" value="510.0" type="string" cy:type="String"/>
    <att name="NETWORK_CENTER_Z_LOCATION" value="0.0" type="string" cy:type="String"/>
    <att name="NETWORK_EDGE_SELECTION" value="true" type="string" cy:type="String"/>
    <att name="NETWORK_DEPTH" value="0.0" type="string" cy:type="String"/>
    <att name="NETWORK_CENTER_Y_LOCATION" value="312.7460021972656" type="string" cy:type="String"/>
    <att name="NETWORK_WIDTH" value="658.0" type="string" cy:type="String"/>
    <att name="NETWORK_ANNOTATION_SELECTION" value="false" type="string" cy:type="String"/>
  </graphics>
  <node id="40954" label="ENSMUSG00000043953" cy:nodeId="2035">
    <graphics z="0.0" y="-4.10191535949707" x="230.97366333007812">
      <att name="lockedVisualProperties" type="list" cy:type="List">
        <att name="NODE_LABEL" value="" type="string" cy:type="String"/>
      </att>
    </graphics>
  </node>
  <node id="40955" label="ENSMUSG00000022769" cy:nodeId="1013">
    <graphics z="0.0" y="394.4403381347656" x="430.7576599121094">
      <att name="lockedVisualProperties" type="list" cy:type="List">
        <att name="NODE_LABEL" value="" type="string" cy:type="String"/>
      </att>
    </graphics>
  </node>
  <node id="40956" label="ENSMUSG00000023224" cy:nodeId="1014">
    <graphics z="0.0" y="509.85687255859375" x="20.894023895263672">
      <att name="lockedVisualProperties" type="list" cy:type="List">
        <att name="NODE_LABEL" value="" type="string" cy:type="String"/>
      </att>
    </graphics>
  </node>
  <node id="40957" label="ENSMUSG00000024033" cy:nodeId="1015">
    <graphics z="0.0" y="70.65777587890625" x="416.1788330078125">
      <att name="lockedVisualProperties" type="list" cy:type="List">
        <att name="NODE_LABEL" value="" type="string" cy:type="String"/>
      </att>
    </graphics>
  </node>
  <node id="40958" label="ENSMUSG00000025027" cy:nodeId="1016">
    <graphics z="0.0" y="502.4759521484375" x="138.78135681152344">
      <att name="lockedVisualProperties" type="list" cy:type="List">
        <att name="NODE_LABEL" value="" type="string" cy:type="String"/>
      </att>
    </graphics>
  </node>
  <node id="40959" label="ENSMUSG00000026764" cy:nodeId="1022">
    <graphics z="0.0" y="272.8741149902344" x="476.83056640625">
      <att name="lockedVisualProperties" type="list" cy:type="List">
        <att name="NODE_LABEL" value="" type="string" cy:type="String"/>
      </att>
    </graphics>
  </node>
  <node id="40960" label="ENSMUSG00000044456" cy:nodeId="2047">
    <graphics z="0.0" y="266.7924499511719" x="61.49497985839844">
      <att name="lockedVisualProperties" type="list" cy:type="List">
        <att name="NODE_LABEL" value="" type="string" cy:type="String"/>
      </att>
    </graphics>
  </node>
  <node id="40961" label="ENSMUSG00000031791" cy:nodeId="1029">
    <graphics z="0.0" y="9.52658462524414" x="437.1515808105469">
      <att name="lockedVisualProperties" type="list" cy:type="List">
        <att name="NODE_LABEL" value="" type="string" cy:type="String"/>
      </att>
    </graphics>
  </node>
  <node id="40962" label="ENSMUSG00000045007" cy:nodeId="2053">
    <graphics z="0.0" y="81.72505950927734" x="452.7645263671875">
      <att name="lockedVisualProperties" type="list" cy:type="List">
        <att name="NODE_LABEL" value="" type="string" cy:type="String"/>
      </att>
    </graphics>
  </node>
  <node id="40963" label="ENSMUSG00000034579" cy:nodeId="1034">
    <graphics z="0.0" y="91.17512512207031" x="19.502540588378906">
      <att name="lockedVisualProperties" type="list" cy:type="List">
        <att name="NODE_LABEL" value="" type="string" cy:type="String"/>
      </att>
    </graphics>
  </node>
  <node id="40964" label="ENSMUSG00000045667" cy:nodeId="2060">
    <graphics z="0.0" y="332.1050720214844" x="-83.19744873046875">
      <att name="lockedVisualProperties" type="list" cy:type="List">
        <att name="NODE_LABEL" value="" type="string" cy:type="String"/>
      </att>
    </graphics>
  </node>
  <node id="40965" label="ENSMUSG00000034858" cy:nodeId="1036">
    <graphics z="0.0" y="323.867919921875" x="19.867507934570312">
      <att name="lockedVisualProperties" type="list" cy:type="List">
        <att name="NODE_LABEL" value="" type="string" cy:type="String"/>
      </att>
    </graphics>
  </node>
  <node id="40966" label="ENSMUSG00000036913" cy:nodeId="1041">
    <graphics z="0.0" y="713.6447143554688" x="309.54058837890625">
      <att name="lockedVisualProperties" type="list" cy:type="List">
        <att name="NODE_LABEL" value="" type="string" cy:type="String"/>
      </att>
    </graphics>
  </node>
  <node id="40967" label="ENSMUSG00000046295" cy:nodeId="2067">
    <graphics z="0.0" y="199.52340698242188" x="475.2652587890625">
      <att name="lockedVisualProperties" type="list" cy:type="List">
        <att name="NODE_LABEL" value="" type="string" cy:type="String"/>
      </att>
    </graphics>
  </node>
  <node id="40968" label="ENSMUSG00000046447" cy:nodeId="2070">
    <graphics z="0.0" y="423.6432800292969" x="229.21466064453125">
      <att name="lockedVisualProperties" type="list" cy:type="List">
        <att name="NODE_LABEL" value="" type="string" cy:type="String"/>
      </att>
    </graphics>
  </node>
  <node id="40969" label="ENSMUSG00000039934" cy:nodeId="1048">
    <graphics z="0.0" y="180.5373077392578" x="153.83233642578125">
      <att name="lockedVisualProperties" type="list" cy:type="List">
        <att name="NODE_LABEL" value="" type="string" cy:type="String"/>
      </att>
    </graphics>
  </node>
  <node id="40970" label="ENSMUSG00000042647" cy:nodeId="1049">
    <graphics z="0.0" y="456.30517578125" x="234.42990112304688">
      <att name="lockedVisualProperties" type="list" cy:type="List">
        <att name="NODE_LABEL" value="" type="string" cy:type="String"/>
      </att>
    </graphics>
  </node>
  <node id="40971" label="ENSMUSG00000043004" cy:nodeId="1050">
    <graphics z="0.0" y="263.6947021484375" x="121.130126953125">
      <att name="lockedVisualProperties" type="list" cy:type="List">
        <att name="NODE_LABEL" value="" type="string" cy:type="String"/>
      </att>
    </graphics>
  </node>
  <node id="40972" label="ENSMUSG00000046688" cy:nodeId="2075">
    <graphics z="0.0" y="417.8380126953125" x="513.0882568359375">
      <att name="lockedVisualProperties" type="list" cy:type="List">
        <att name="NODE_LABEL" value="" type="string" cy:type="String"/>
      </att>
    </graphics>
  </node>
  <node id="40973" label="ENSMUSG00000043639" cy:nodeId="1051">
    <graphics z="0.0" y="404.33209228515625" x="495.90411376953125">
      <att name="lockedVisualProperties" type="list" cy:type="List">
        <att name="NODE_LABEL" value="" type="string" cy:type="String"/>
      </att>
    </graphics>
  </node>
  <node id="40974" label="ENSMUSG00000046841" cy:nodeId="2077">
    <graphics z="0.0" y="212.03961181640625" x="517.8140258789062">
      <att name="lockedVisualProperties" type="list" cy:type="List">
        <att name="NODE_LABEL" value="" type="string" cy:type="String"/>
      </att>
    </graphics>
  </node>
  <node id="40318" label="ENSMUSG00000053216" cy:nodeId="1059">
    <graphics z="0.0" y="140.98060607910156" x="-11.702442169189453">
      <att name="lockedVisualProperties" type="list" cy:type="List">
        <att name="NODE_LABEL" value="" type="string" cy:type="String"/>
      </att>
    </graphics>
  </node>
  <node id="40319" label="ENSMUSG00000047501" cy:nodeId="2084">
    <graphics z="0.0" y="223.34669494628906" x="76.7266845703125">
      <att name="lockedVisualProperties" type="list" cy:type="List">
        <att name="NODE_LABEL" value="" type="string" cy:type="String"/>
      </att>
    </graphics>
  </node>
  <node id="40320" label="ENSMUSG00000063439" cy:nodeId="1064">
    <graphics z="0.0" y="479.7529602050781" x="338.80413818359375">
      <att name="lockedVisualProperties" type="list" cy:type="List">
        <att name="NODE_LABEL" value="" type="string" cy:type="String"/>
      </att>
    </graphics>
  </node>
  <node id="40321" label="ENSMUSG00000063450" cy:nodeId="1065">
    <graphics z="0.0" y="584.5301513671875" x="417.57073974609375">
      <att name="lockedVisualProperties" type="list" cy:type="List">
        <att name="NODE_LABEL" value="" type="string" cy:type="String"/>
      </att>
    </graphics>
  </node>
  <node id="40322" label="ENSMUSG00000066952" cy:nodeId="1066">
    <graphics z="0.0" y="67.69413757324219" x="366.6892395019531">
      <att name="lockedVisualProperties" type="list" cy:type="List">
        <att name="NODE_LABEL" value="" type="string" cy:type="String"/>
      </att>
    </graphics>
  </node>
  <node id="40323" label="ENSMUSG00000069622" cy:nodeId="1068">
    <graphics z="0.0" y="310.4110107421875" x="462.8825988769531">
      <att name="lockedVisualProperties" type="list" cy:type="List">
        <att name="NODE_LABEL" value="" type="string" cy:type="String"/>
      </att>
    </graphics>
  </node>
  <node id="40325" label="ENSMUSG00000047767" cy:nodeId="2093">
    <graphics z="0.0" y="7.504703521728516" x="289.058349609375">
      <att name="lockedVisualProperties" type="list" cy:type="List">
        <att name="NODE_LABEL" value="" type="string" cy:type="String"/>
      </att>
    </graphics>
  </node>
  <node id="40324" label="ENSMUSG00000070287" cy:nodeId="1069">
    <graphics z="0.0" y="44.365936279296875" x="158.49778747558594">
      <att name="lockedVisualProperties" type="list" cy:type="List">
        <att name="NODE_LABEL" value="" type="string" cy:type="String"/>
      </att>
    </graphics>
  </node>
  <node id="40326" label="ENSMUSG00000070802" cy:nodeId="1070">
    <graphics z="0.0" y="386.24725341796875" x="0.9139289855957031">
      <att name="lockedVisualProperties" type="list" cy:type="List">
        <att name="NODE_LABEL" value="" type="string" cy:type="String"/>
      </att>
    </graphics>
  </node>
  <node id="40327" label="ENSMUSG00000079037" cy:nodeId="1071">
    <graphics z="0.0" y="579.4411010742188" x="67.32023620605469">
      <att name="lockedVisualProperties" type="list" cy:type="List">
        <att name="NODE_LABEL" value="" type="string" cy:type="String"/>
      </att>
    </graphics>
  </node>
  <node id="40328" label="ENSMUSG00000002885" cy:nodeId="1073">
    <graphics z="0.0" y="140.61282348632812" x="15.864051818847656">
      <att name="lockedVisualProperties" type="list" cy:type="List">
        <att name="NODE_LABEL" value="" type="string" cy:type="String"/>
      </att>
    </graphics>
  </node>
  <node id="40330" label="ENSMUSG00000047963" cy:nodeId="2099">
    <graphics z="0.0" y="579.1675415039062" x="239.68548583984375">
      <att name="lockedVisualProperties" type="list" cy:type="List">
        <att name="NODE_LABEL" value="" type="string" cy:type="String"/>
      </att>
    </graphics>
  </node>
  <node id="40329" label="ENSMUSG00000006800" cy:nodeId="1075">
    <graphics z="0.0" y="553.6385498046875" x="190.80191040039062">
      <att name="lockedVisualProperties" type="list" cy:type="List">
        <att name="NODE_LABEL" value="" type="string" cy:type="String"/>
      </att>
    </graphics>
  </node>
  <node id="40331" label="ENSMUSG00000015745" cy:nodeId="1076">
    <graphics z="0.0" y="392.8355712890625" x="429.8985595703125">
      <att name="lockedVisualProperties" type="list" cy:type="List">
        <att name="NODE_LABEL" value="" type="string" cy:type="String"/>
      </att>
    </graphics>
  </node>
  <node id="40332" label="ENSMUSG00000020641" cy:nodeId="1079">
    <graphics z="0.0" y="256.5869140625" x="-13.567848205566406">
      <att name="lockedVisualProperties" type="list" cy:type="List">
        <att name="NODE_LABEL" value="" type="string" cy:type="String"/>
      </att>
    </graphics>
  </node>
  <node id="40333" label="ENSMUSG00000048232" cy:nodeId="2106">
    <graphics z="0.0" y="202.875732421875" x="370.30859375">
      <att name="lockedVisualProperties" type="list" cy:type="List">
        <att name="NODE_LABEL" value="" type="string" cy:type="String"/>
      </att>
    </graphics>
  </node>
  <node id="40334" label="ENSMUSG00000048279" cy:nodeId="2107">
    <graphics z="0.0" y="435.7839660644531" x="373.877685546875">
      <att name="lockedVisualProperties" type="list" cy:type="List">
        <att name="NODE_LABEL" value="" type="string" cy:type="String"/>
      </att>
    </graphics>
  </node>
  <node id="40336" label="ENSMUSG00000048424" cy:nodeId="2110">
    <graphics z="0.0" y="622.76708984375" x="327.7220153808594">
      <att name="lockedVisualProperties" type="list" cy:type="List">
        <att name="NODE_LABEL" value="" type="string" cy:type="String"/>
      </att>
    </graphics>
  </node>
  <node id="40335" label="ENSMUSG00000028415" cy:nodeId="1086">
    <graphics z="0.0" y="294.5123291015625" x="18.580154418945312">
      <att name="lockedVisualProperties" type="list" cy:type="List">
        <att name="NODE_LABEL" value="" type="string" cy:type="String"/>
      </att>
    </graphics>
  </node>
  <node id="40337" label="ENSMUSG00000028614" cy:nodeId="1087">
    <graphics z="0.0" y="212.99839782714844" x="281.6447448730469">
      <att name="lockedVisualProperties" type="list" cy:type="List">
        <att name="NODE_LABEL" value="" type="string" cy:type="String"/>
      </att>
    </graphics>
  </node>
  <node id="40339" label="ENSMUSG00000037936" cy:nodeId="1093">
    <graphics z="0.0" y="602.9928588867188" x="346.99072265625">
      <att name="lockedVisualProperties" type="list" cy:type="List">
        <att name="NODE_LABEL" value="" type="string" cy:type="String"/>
      </att>
    </graphics>
  </node>
  <node id="40338" label="ENSMUSG00000048911" cy:nodeId="2117">
    <graphics z="0.0" y="193.07363891601562" x="421.86474609375">
      <att name="lockedVisualProperties" type="list" cy:type="List">
        <att name="NODE_LABEL" value="" type="string" cy:type="String"/>
      </att>
    </graphics>
  </node>
  <node id="40340" label="ENSMUSG00000038843" cy:nodeId="1094">
    <graphics z="0.0" y="54.12755584716797" x="396.4458312988281">
      <att name="lockedVisualProperties" type="list" cy:type="List">
        <att name="NODE_LABEL" value="" type="string" cy:type="String"/>
      </att>
    </graphics>
  </node>
  <node id="40341" label="ENSMUSG00000049154" cy:nodeId="2122">
    <graphics z="0.0" y="173.30397033691406" x="56.837440490722656">
      <att name="lockedVisualProperties" type="list" cy:type="List">
        <att name="NODE_LABEL" value="" type="string" cy:type="String"/>
      </att>
    </graphics>
  </node>
  <node id="40342" label="ENSMUSG00000048473" cy:nodeId="1099">
    <graphics z="0.0" y="26.367259979248047" x="93.6591796875">
      <att name="lockedVisualProperties" type="list" cy:type="List">
        <att name="NODE_LABEL" value="" type="string" cy:type="String"/>
      </att>
    </graphics>
  </node>
  <node id="40343" label="ENSMUSG00000022479" cy:nodeId="77">
    <graphics z="0.0" y="334.792724609375" x="227.50119018554688">
      <att name="lockedVisualProperties" type="list" cy:type="List">
        <att name="NODE_LABEL" value="" type="string" cy:type="String"/>
      </att>
    </graphics>
  </node>
  <node id="40344" label="ENSMUSG00000050592" cy:nodeId="1102">
    <graphics z="0.0" y="178.8772735595703" x="295.4059753417969">
      <att name="lockedVisualProperties" type="list" cy:type="List">
        <att name="NODE_LABEL" value="" type="string" cy:type="String"/>
      </att>
    </graphics>
  </node>
  <node id="40345" label="ENSMUSG00000049858" cy:nodeId="2127">
    <graphics z="0.0" y="291.019287109375" x="461.9919738769531">
      <att name="lockedVisualProperties" type="list" cy:type="List">
        <att name="NODE_LABEL" value="" type="string" cy:type="String"/>
      </att>
    </graphics>
  </node>
  <node id="40346" label="ENSMUSG00000017950" cy:nodeId="81">
    <graphics z="0.0" y="347.74505615234375" x="228.45034790039062">
      <att name="lockedVisualProperties" type="list" cy:type="List">
        <att name="NODE_LABEL" value="" type="string" cy:type="String"/>
      </att>
    </graphics>
  </node>
  <node id="40347" label="ENSMUSG00000056602" cy:nodeId="1106">
    <graphics z="0.0" y="409.01007566981383" x="621.9218705621489">
      <att name="lockedVisualProperties" type="list" cy:type="List">
        <att name="NODE_LABEL" value="" type="string" cy:type="String"/>
      </att>
    </graphics>
  </node>
  <node id="40348" label="ENSMUSG00000050103" cy:nodeId="2131">
    <graphics z="0.0" y="591.8427734375" x="374.7142333984375">
      <att name="lockedVisualProperties" type="list" cy:type="List">
        <att name="NODE_LABEL" value="" type="string" cy:type="String"/>
      </att>
    </graphics>
  </node>
  <node id="40349" label="ENSMUSG00000037583" cy:nodeId="83">
    <graphics z="0.0" y="376.07696533203125" x="358.7734680175781">
      <att name="lockedVisualProperties" type="list" cy:type="List">
        <att name="NODE_LABEL" value="" type="string" cy:type="String"/>
      </att>
    </graphics>
  </node>
  <node id="40350" label="ENSMUSG00000050240" cy:nodeId="2133">
    <graphics z="0.0" y="639.9649047851562" x="78.73793029785156">
      <att name="lockedVisualProperties" type="list" cy:type="List">
        <att name="NODE_LABEL" value="" type="string" cy:type="String"/>
      </att>
    </graphics>
  </node>
  <node id="40351" label="ENSMUSG00000050270" cy:nodeId="2134">
    <graphics z="0.0" y="327.4783020019531" x="144.57449340820312">
      <att name="lockedVisualProperties" type="list" cy:type="List">
        <att name="NODE_LABEL" value="" type="string" cy:type="String"/>
      </att>
    </graphics>
  </node>
  <node id="40352" label="ENSMUSG00000041237" cy:nodeId="1113">
    <graphics z="0.0" y="277.8477783203125" x="344.99713134765625">
      <att name="lockedVisualProperties" type="list" cy:type="List">
        <att name="NODE_LABEL" value="" type="string" cy:type="String"/>
      </att>
    </graphics>
  </node>
  <node id="40353" label="ENSMUSG00000054422" cy:nodeId="92">
    <graphics z="0.0" y="254.184326171875" x="553.1419677734375">
      <att name="lockedVisualProperties" type="list" cy:type="List">
        <att name="NODE_LABEL" value="" type="string" cy:type="String"/>
      </att>
    </graphics>
  </node>
  <node id="40354" label="ENSMUSG00000018486" cy:nodeId="1117">
    <graphics z="0.0" y="500.400634765625" x="-8.187576293945312">
      <att name="lockedVisualProperties" type="list" cy:type="List">
        <att name="NODE_LABEL" value="" type="string" cy:type="String"/>
      </att>
    </graphics>
  </node>
  <node id="40355" label="ENSMUSG00000059142" cy:nodeId="1120">
    <graphics z="0.0" y="516.3922119140625" x="-1.6536827087402344">
      <att name="lockedVisualProperties" type="list" cy:type="List">
        <att name="NODE_LABEL" value="" type="string" cy:type="String"/>
      </att>
    </graphics>
  </node>
  <node id="40356" label="ENSMUSG00000005677" cy:nodeId="1121">
    <graphics z="0.0" y="182.5062255859375" x="44.9697265625">
      <att name="lockedVisualProperties" type="list" cy:type="List">
        <att name="NODE_LABEL" value="" type="string" cy:type="String"/>
      </att>
    </graphics>
  </node>
  <node id="40357" label="ENSMUSG00000051185" cy:nodeId="2145">
    <graphics z="0.0" y="499.544921875" x="363.1785583496094">
      <att name="lockedVisualProperties" type="list" cy:type="List">
        <att name="NODE_LABEL" value="" type="string" cy:type="String"/>
      </att>
    </graphics>
  </node>
  <node id="40358" label="ENSMUSG00000052131" cy:nodeId="1122">
    <graphics z="0.0" y="614.27294921875" x="85.42684936523438">
      <att name="lockedVisualProperties" type="list" cy:type="List">
        <att name="NODE_LABEL" value="" type="string" cy:type="String"/>
      </att>
    </graphics>
  </node>
  <node id="40359" label="ENSMUSG00000051314" cy:nodeId="2147">
    <graphics z="0.0" y="206.14352416992188" x="448.9588928222656">
      <att name="lockedVisualProperties" type="list" cy:type="List">
        <att name="NODE_LABEL" value="" type="string" cy:type="String"/>
      </att>
    </graphics>
  </node>
  <node id="40360" label="ENSMUSG00000035158" cy:nodeId="99">
    <graphics z="0.0" y="330.5946044921875" x="229.00912475585938">
      <att name="lockedVisualProperties" type="list" cy:type="List">
        <att name="NODE_LABEL" value="" type="string" cy:type="String"/>
      </att>
    </graphics>
  </node>
  <node id="40361" label="ENSMUSG00000069515" cy:nodeId="103">
    <graphics z="0.0" y="484.9337463378906" x="279.134765625">
      <att name="lockedVisualProperties" type="list" cy:type="List">
        <att name="NODE_LABEL" value="" type="string" cy:type="String"/>
      </att>
    </graphics>
  </node>
  <node id="40362" label="ENSMUSG00000051498" cy:nodeId="2152">
    <graphics z="0.0" y="545.532470703125" x="-36.54048156738281">
      <att name="lockedVisualProperties" type="list" cy:type="List">
        <att name="NODE_LABEL" value="" type="string" cy:type="String"/>
      </att>
    </graphics>
  </node>
  <node id="40363" label="ENSMUSG00000000120" cy:nodeId="1129">
    <graphics z="0.0" y="105.46043395996094" x="69.9144515991211">
      <att name="lockedVisualProperties" type="list" cy:type="List">
        <att name="NODE_LABEL" value="" type="string" cy:type="String"/>
      </att>
    </graphics>
  </node>
  <node id="40364" label="ENSMUSG00000000125" cy:nodeId="1130">
    <graphics z="0.0" y="510.7635498046875" x="-6.517448425292969">
      <att name="lockedVisualProperties" type="list" cy:type="List">
        <att name="NODE_LABEL" value="" type="string" cy:type="String"/>
      </att>
    </graphics>
  </node>
  <node id="40365" label="ENSMUSG00000026398" cy:nodeId="106">
    <graphics z="0.0" y="360.0177307128906" x="247.15084838867188">
      <att name="lockedVisualProperties" type="list" cy:type="List">
        <att name="NODE_LABEL" value="" type="string" cy:type="String"/>
      </att>
    </graphics>
  </node>
  <node id="40366" label="ENSMUSG00000018909" cy:nodeId="107">
    <graphics z="0.0" y="249.29855346679688" x="286.195068359375">
      <att name="lockedVisualProperties" type="list" cy:type="List">
        <att name="NODE_LABEL" value="" type="string" cy:type="String"/>
      </att>
    </graphics>
  </node>
  <node id="40367" label="ENSMUSG00000027544" cy:nodeId="108">
    <graphics z="0.0" y="347.83380126953125" x="291.62109375">
      <att name="lockedVisualProperties" type="list" cy:type="List">
        <att name="NODE_LABEL" value="" type="string" cy:type="String"/>
      </att>
    </graphics>
  </node>
  <node id="40368" label="ENSMUSG00000052353" cy:nodeId="2160">
    <graphics z="0.0" y="457.40850830078125" x="17.556838989257812">
      <att name="lockedVisualProperties" type="list" cy:type="List">
        <att name="NODE_LABEL" value="" type="string" cy:type="String"/>
      </att>
    </graphics>
  </node>
  <node id="40369" label="ENSMUSG00000000673" cy:nodeId="1137">
    <graphics z="0.0" y="81.40878295898438" x="36.597023010253906">
      <att name="lockedVisualProperties" type="list" cy:type="List">
        <att name="NODE_LABEL" value="" type="string" cy:type="String"/>
      </att>
    </graphics>
  </node>
  <node id="40370" label="ENSMUSG00000000732" cy:nodeId="1138">
    <graphics z="0.0" y="158.39321899414062" x="11.805519104003906">
      <att name="lockedVisualProperties" type="list" cy:type="List">
        <att name="NODE_LABEL" value="" type="string" cy:type="String"/>
      </att>
    </graphics>
  </node>
  <node id="40371" label="ENSMUSG00000000056" cy:nodeId="114">
    <graphics z="0.0" y="306.62396240234375" x="53.75812530517578">
      <att name="lockedVisualProperties" type="list" cy:type="List">
        <att name="NODE_LABEL" value="" type="string" cy:type="String"/>
      </att>
    </graphics>
  </node>
  <node id="40372" label="ENSMUSG00000052384" cy:nodeId="2162">
    <graphics z="0.0" y="327.86151123046875" x="517.6495971679688">
      <att name="lockedVisualProperties" type="list" cy:type="List">
        <att name="NODE_LABEL" value="" type="string" cy:type="String"/>
      </att>
    </graphics>
  </node>
  <node id="40373" label="ENSMUSG00000000126" cy:nodeId="115">
    <graphics z="0.0" y="580.1919555664062" x="69.3009262084961">
      <att name="lockedVisualProperties" type="list" cy:type="List">
        <att name="NODE_LABEL" value="" type="string" cy:type="String"/>
      </att>
    </graphics>
  </node>
  <node id="40374" label="ENSMUSG00000000791" cy:nodeId="1139">
    <graphics z="0.0" y="232.2271270751953" x="119.37075805664062">
      <att name="lockedVisualProperties" type="list" cy:type="List">
        <att name="NODE_LABEL" value="" type="string" cy:type="String"/>
      </att>
    </graphics>
  </node>
  <node id="40375" label="ENSMUSG00000052584" cy:nodeId="2164">
    <graphics z="0.0" y="488.03778076171875" x="466.1294860839844">
      <att name="lockedVisualProperties" type="list" cy:type="List">
        <att name="NODE_LABEL" value="" type="string" cy:type="String"/>
      </att>
    </graphics>
  </node>
  <node id="40376" label="ENSMUSG00000000555" cy:nodeId="119">
    <graphics z="0.0" y="567.0162963867188" x="459.9452819824219">
      <att name="lockedVisualProperties" type="list" cy:type="List">
        <att name="NODE_LABEL" value="" type="string" cy:type="String"/>
      </att>
    </graphics>
  </node>
  <node id="40377" label="ENSMUSG00000001435" cy:nodeId="124">
    <graphics z="0.0" y="659.9147338867188" x="285.37213134765625">
      <att name="lockedVisualProperties" type="list" cy:type="List">
        <att name="NODE_LABEL" value="" type="string" cy:type="String"/>
      </att>
    </graphics>
  </node>
  <node id="40378" label="ENSMUSG00000053581" cy:nodeId="2173">
    <graphics z="0.0" y="240.44915771484375" x="264.91259765625">
      <att name="lockedVisualProperties" type="list" cy:type="List">
        <att name="NODE_LABEL" value="" type="string" cy:type="String"/>
      </att>
    </graphics>
  </node>
  <node id="40379" label="ENSMUSG00000001467" cy:nodeId="1150">
    <graphics z="0.0" y="380.0320129394531" x="476.78759765625">
      <att name="lockedVisualProperties" type="list" cy:type="List">
        <att name="NODE_LABEL" value="" type="string" cy:type="String"/>
      </att>
    </graphics>
  </node>
  <node id="40380" label="ENSMUSG00000053604" cy:nodeId="2174">
    <graphics z="0.0" y="508.12701416015625" x="100.58819580078125">
      <att name="lockedVisualProperties" type="list" cy:type="List">
        <att name="NODE_LABEL" value="" type="string" cy:type="String"/>
      </att>
    </graphics>
  </node>
  <node id="40381" label="ENSMUSG00000053617" cy:nodeId="2175">
    <graphics z="0.0" y="302.96807861328125" x="-87.62889099121094">
      <att name="lockedVisualProperties" type="list" cy:type="List">
        <att name="NODE_LABEL" value="" type="string" cy:type="String"/>
      </att>
    </graphics>
  </node>
  <node id="40382" label="ENSMUSG00000053862" cy:nodeId="2176">
    <graphics z="0.0" y="551.3927612304688" x="114.55055236816406">
      <att name="lockedVisualProperties" type="list" cy:type="List">
        <att name="NODE_LABEL" value="" type="string" cy:type="String"/>
      </att>
    </graphics>
  </node>
  <node id="40383" label="ENSMUSG00000003134" cy:nodeId="131">
    <graphics z="0.0" y="582.7350463867188" x="189.35797119140625">
      <att name="lockedVisualProperties" type="list" cy:type="List">
        <att name="NODE_LABEL" value="" type="string" cy:type="String"/>
      </att>
    </graphics>
  </node>
  <node id="40384" label="ENSMUSG00000054200" cy:nodeId="2181">
    <graphics z="0.0" y="153.03152465820312" x="-34.49275207519531">
      <att name="lockedVisualProperties" type="list" cy:type="List">
        <att name="NODE_LABEL" value="" type="string" cy:type="String"/>
      </att>
    </graphics>
  </node>
  <node id="40385" label="ENSMUSG00000003420" cy:nodeId="133">
    <graphics z="0.0" y="82.31712341308594" x="362.2295227050781">
      <att name="lockedVisualProperties" type="list" cy:type="List">
        <att name="NODE_LABEL" value="" type="string" cy:type="String"/>
      </att>
    </graphics>
  </node>
  <node id="40386" label="ENSMUSG00000003541" cy:nodeId="135">
    <graphics z="0.0" y="592.4788818359375" x="42.980682373046875">
      <att name="lockedVisualProperties" type="list" cy:type="List">
        <att name="NODE_LABEL" value="" type="string" cy:type="String"/>
      </att>
    </graphics>
  </node>
  <node id="40387" label="ENSMUSG00000003545" cy:nodeId="136">
    <graphics z="0.0" y="384.01251220703125" x="296.487548828125">
      <att name="lockedVisualProperties" type="list" cy:type="List">
        <att name="NODE_LABEL" value="" type="string" cy:type="String"/>
      </att>
    </graphics>
  </node>
  <node id="40388" label="ENSMUSG00000004044" cy:nodeId="138">
    <graphics z="0.0" y="523.149658203125" x="132.4351043701172">
      <att name="lockedVisualProperties" type="list" cy:type="List">
        <att name="NODE_LABEL" value="" type="string" cy:type="String"/>
      </att>
    </graphics>
  </node>
  <node id="40389" label="ENSMUSG00000004270" cy:nodeId="139">
    <graphics z="0.0" y="570.9158325195312" x="423.89312744140625">
      <att name="lockedVisualProperties" type="list" cy:type="List">
        <att name="NODE_LABEL" value="" type="string" cy:type="String"/>
      </att>
    </graphics>
  </node>
  <node id="40390" label="ENSMUSG00000004328" cy:nodeId="140">
    <graphics z="0.0" y="219.5332489013672" x="408.65582275390625">
      <att name="lockedVisualProperties" type="list" cy:type="List">
        <att name="NODE_LABEL" value="" type="string" cy:type="String"/>
      </att>
    </graphics>
  </node>
  <node id="40391" label="ENSMUSG00000054920" cy:nodeId="2190">
    <graphics z="0.0" y="462.66949462890625" x="368.0783386230469">
      <att name="lockedVisualProperties" type="list" cy:type="List">
        <att name="NODE_LABEL" value="" type="string" cy:type="String"/>
      </att>
    </graphics>
  </node>
  <node id="40392" label="ENSMUSG00000004864" cy:nodeId="143">
    <graphics z="0.0" y="658.4239501953125" x="230.34979248046875">
      <att name="lockedVisualProperties" type="list" cy:type="List">
        <att name="NODE_LABEL" value="" type="string" cy:type="String"/>
      </att>
    </graphics>
  </node>
  <node id="40393" label="ENSMUSG00000054932" cy:nodeId="2191">
    <graphics z="0.0" y="112.61749267578125" x="435.8677062988281">
      <att name="lockedVisualProperties" type="list" cy:type="List">
        <att name="NODE_LABEL" value="" type="string" cy:type="String"/>
      </att>
    </graphics>
  </node>
  <node id="40394" label="ENSMUSG00000004951" cy:nodeId="144">
    <graphics z="0.0" y="635.2923583984375" x="96.12089538574219">
      <att name="lockedVisualProperties" type="list" cy:type="List">
        <att name="NODE_LABEL" value="" type="string" cy:type="String"/>
      </att>
    </graphics>
  </node>
  <node id="40395" label="ENSMUSG00000054958" cy:nodeId="2192">
    <graphics z="0.0" y="138.5989227294922" x="128.01190185546875">
      <att name="lockedVisualProperties" type="list" cy:type="List">
        <att name="NODE_LABEL" value="" type="string" cy:type="String"/>
      </att>
    </graphics>
  </node>
  <node id="40396" label="ENSMUSG00000002997" cy:nodeId="1168">
    <graphics z="0.0" y="338.30267333984375" x="468.40399169921875">
      <att name="lockedVisualProperties" type="list" cy:type="List">
        <att name="NODE_LABEL" value="" type="string" cy:type="String"/>
      </att>
    </graphics>
  </node>
  <node id="40397" label="ENSMUSG00000005320" cy:nodeId="146">
    <graphics z="0.0" y="255.76016235351562" x="537.7916259765625">
      <att name="lockedVisualProperties" type="list" cy:type="List">
        <att name="NODE_LABEL" value="" type="string" cy:type="String"/>
      </att>
    </graphics>
  </node>
  <node id="40398" label="ENSMUSG00000055114" cy:nodeId="2194">
    <graphics z="0.0" y="442.20098876953125" x="401.35919189453125">
      <att name="lockedVisualProperties" type="list" cy:type="List">
        <att name="NODE_LABEL" value="" type="string" cy:type="String"/>
      </att>
    </graphics>
  </node>
  <node id="40399" label="ENSMUSG00000005413" cy:nodeId="148">
    <graphics z="0.0" y="233.1066436767578" x="92.51979064941406">
      <att name="lockedVisualProperties" type="list" cy:type="List">
        <att name="NODE_LABEL" value="" type="string" cy:type="String"/>
      </att>
    </graphics>
  </node>
  <node id="40400" label="ENSMUSG00000005611" cy:nodeId="149">
    <graphics z="0.0" y="160.26553344726562" x="391.403564453125">
      <att name="lockedVisualProperties" type="list" cy:type="List">
        <att name="NODE_LABEL" value="" type="string" cy:type="String"/>
      </att>
    </graphics>
  </node>
  <node id="40401" label="ENSMUSG00000005873" cy:nodeId="150">
    <graphics z="0.0" y="330.6744079589844" x="531.0576782226562">
      <att name="lockedVisualProperties" type="list" cy:type="List">
        <att name="NODE_LABEL" value="" type="string" cy:type="String"/>
      </att>
    </graphics>
  </node>
  <node id="40402" label="ENSMUSG00000055493" cy:nodeId="2199">
    <graphics z="0.0" y="196.15887451171875" x="171.93798828125">
      <att name="lockedVisualProperties" type="list" cy:type="List">
        <att name="NODE_LABEL" value="" type="string" cy:type="String"/>
      </att>
    </graphics>
  </node>
  <node id="40403" label="ENSMUSG00000055538" cy:nodeId="2200">
    <graphics z="0.0" y="365.5482482910156" x="531.3756103515625">
      <att name="lockedVisualProperties" type="list" cy:type="List">
        <att name="NODE_LABEL" value="" type="string" cy:type="String"/>
      </att>
    </graphics>
  </node>
  <node id="40404" label="ENSMUSG00000055675" cy:nodeId="2203">
    <graphics z="0.0" y="241.04324340820312" x="121.81439208984375">
      <att name="lockedVisualProperties" type="list" cy:type="List">
        <att name="NODE_LABEL" value="" type="string" cy:type="String"/>
      </att>
    </graphics>
  </node>
  <node id="40405" label="ENSMUSG00000004880" cy:nodeId="1182">
    <graphics z="0.0" y="18.323604583740234" x="257.38909912109375">
      <att name="lockedVisualProperties" type="list" cy:type="List">
        <att name="NODE_LABEL" value="" type="string" cy:type="String"/>
      </att>
    </graphics>
  </node>
  <node id="40406" label="ENSMUSG00000006642" cy:nodeId="158">
    <graphics z="0.0" y="190.75025939941406" x="-20.48920440673828">
      <att name="lockedVisualProperties" type="list" cy:type="List">
        <att name="NODE_LABEL" value="" type="string" cy:type="String"/>
      </att>
    </graphics>
  </node>
  <node id="40407" label="ENSMUSG00000006731" cy:nodeId="159">
    <graphics z="0.0" y="349.32440185546875" x="-16.579574584960938">
      <att name="lockedVisualProperties" type="list" cy:type="List">
        <att name="NODE_LABEL" value="" type="string" cy:type="String"/>
      </att>
    </graphics>
  </node>
  <node id="40408" label="ENSMUSG00000056413" cy:nodeId="2209">
    <graphics z="0.0" y="172.7041778564453" x="124.17073059082031">
      <att name="lockedVisualProperties" type="list" cy:type="List">
        <att name="NODE_LABEL" value="" type="string" cy:type="String"/>
      </att>
    </graphics>
  </node>
  <node id="40409" label="ENSMUSG00000005470" cy:nodeId="1186">
    <graphics z="0.0" y="332.6689147949219" x="93.1097412109375">
      <att name="lockedVisualProperties" type="list" cy:type="List">
        <att name="NODE_LABEL" value="" type="string" cy:type="String"/>
      </att>
    </graphics>
  </node>
  <node id="40410" label="ENSMUSG00000009739" cy:nodeId="165">
    <graphics z="0.0" y="610.5296020507812" x="267.4621276855469">
      <att name="lockedVisualProperties" type="list" cy:type="List">
        <att name="NODE_LABEL" value="" type="string" cy:type="String"/>
      </att>
    </graphics>
  </node>
  <node id="40411" label="ENSMUSG00000010362" cy:nodeId="167">
    <graphics z="0.0" y="121.29179382324219" x="82.73412322998047">
      <att name="lockedVisualProperties" type="list" cy:type="List">
        <att name="NODE_LABEL" value="" type="string" cy:type="String"/>
      </att>
    </graphics>
  </node>
  <node id="40412" label="ENSMUSG00000056758" cy:nodeId="2216">
    <graphics z="0.0" y="431.9615478515625" x="418.4183654785156">
      <att name="lockedVisualProperties" type="list" cy:type="List">
        <att name="NODE_LABEL" value="" type="string" cy:type="String"/>
      </att>
    </graphics>
  </node>
  <node id="40413" label="ENSMUSG00000011148" cy:nodeId="169">
    <graphics z="0.0" y="155.73995971679688" x="276.61834716796875">
      <att name="lockedVisualProperties" type="list" cy:type="List">
        <att name="NODE_LABEL" value="" type="string" cy:type="String"/>
      </att>
    </graphics>
  </node>
  <node id="40414" label="ENSMUSG00000056888" cy:nodeId="2217">
    <graphics z="0.0" y="551.078125" x="265.0098571777344">
      <att name="lockedVisualProperties" type="list" cy:type="List">
        <att name="NODE_LABEL" value="" type="string" cy:type="String"/>
      </att>
    </graphics>
  </node>
  <node id="40415" label="ENSMUSG00000056973" cy:nodeId="2218">
    <graphics z="0.0" y="264.524658203125" x="519.9366455078125">
      <att name="lockedVisualProperties" type="list" cy:type="List">
        <att name="NODE_LABEL" value="" type="string" cy:type="String"/>
      </att>
    </graphics>
  </node>
  <node id="40416" label="ENSMUSG00000012126" cy:nodeId="172">
    <graphics z="0.0" y="319.7919616699219" x="-48.502845764160156">
      <att name="lockedVisualProperties" type="list" cy:type="List">
        <att name="NODE_LABEL" value="" type="string" cy:type="String"/>
      </att>
    </graphics>
  </node>
  <node id="40417" label="ENSMUSG00000013089" cy:nodeId="173">
    <graphics z="0.0" y="100.21894836425781" x="299.4153747558594">
      <att name="lockedVisualProperties" type="list" cy:type="List">
        <att name="NODE_LABEL" value="" type="string" cy:type="String"/>
      </att>
    </graphics>
  </node>
  <node id="40418" label="ENSMUSG00000013846" cy:nodeId="174">
    <graphics z="0.0" y="258.82080078125" x="29.863677978515625">
      <att name="lockedVisualProperties" type="list" cy:type="List">
        <att name="NODE_LABEL" value="" type="string" cy:type="String"/>
      </att>
    </graphics>
  </node>
  <node id="40419" label="ENSMUSG00000014303" cy:nodeId="175">
    <graphics z="0.0" y="579.3292846679688" x="276.60723876953125">
      <att name="lockedVisualProperties" type="list" cy:type="List">
        <att name="NODE_LABEL" value="" type="string" cy:type="String"/>
      </att>
    </graphics>
  </node>
  <node id="40420" label="ENSMUSG00000014351" cy:nodeId="176">
    <graphics z="0.0" y="59.21643829345703" x="267.1701965332031">
      <att name="lockedVisualProperties" type="list" cy:type="List">
        <att name="NODE_LABEL" value="" type="string" cy:type="String"/>
      </att>
    </graphics>
  </node>
  <node id="40421" label="ENSMUSG00000007207" cy:nodeId="1200">
    <graphics z="0.0" y="448.75665283203125" x="388.9183349609375">
      <att name="lockedVisualProperties" type="list" cy:type="List">
        <att name="NODE_LABEL" value="" type="string" cy:type="String"/>
      </att>
    </graphics>
  </node>
  <node id="40422" label="ENSMUSG00000015112" cy:nodeId="179">
    <graphics z="0.0" y="335.9134826660156" x="131.34605407714844">
      <att name="lockedVisualProperties" type="list" cy:type="List">
        <att name="NODE_LABEL" value="" type="string" cy:type="String"/>
      </att>
    </graphics>
  </node>
  <node id="40423" label="ENSMUSG00000015396" cy:nodeId="181">
    <graphics z="0.0" y="648.933837890625" x="168.0725555419922">
      <att name="lockedVisualProperties" type="list" cy:type="List">
        <att name="NODE_LABEL" value="" type="string" cy:type="String"/>
      </att>
    </graphics>
  </node>
  <node id="40424" label="ENSMUSG00000009646" cy:nodeId="1207">
    <graphics z="0.0" y="373.3265380859375" x="-12.219924926757812">
      <att name="lockedVisualProperties" type="list" cy:type="List">
        <att name="NODE_LABEL" value="" type="string" cy:type="String"/>
      </att>
    </graphics>
  </node>
  <node id="40425" label="ENSMUSG00000015647" cy:nodeId="183">
    <graphics z="0.0" y="527.4559326171875" x="387.2796325683594">
      <att name="lockedVisualProperties" type="list" cy:type="List">
        <att name="NODE_LABEL" value="" type="string" cy:type="String"/>
      </att>
    </graphics>
  </node>
  <node id="40426" label="ENSMUSG00000010021" cy:nodeId="1208">
    <graphics z="0.0" y="423.8465881347656" x="-75.36188507080078">
      <att name="lockedVisualProperties" type="list" cy:type="List">
        <att name="NODE_LABEL" value="" type="string" cy:type="String"/>
      </att>
    </graphics>
  </node>
  <node id="40427" label="ENSMUSG00000058216" cy:nodeId="2232">
    <graphics z="0.0" y="26.014087677001953" x="162.16578674316406">
      <att name="lockedVisualProperties" type="list" cy:type="List">
        <att name="NODE_LABEL" value="" type="string" cy:type="String"/>
      </att>
    </graphics>
  </node>
  <node id="40428" label="ENSMUSG00000010122" cy:nodeId="1209">
    <graphics z="0.0" y="405.4752502441406" x="158.85470581054688">
      <att name="lockedVisualProperties" type="list" cy:type="List">
        <att name="NODE_LABEL" value="" type="string" cy:type="String"/>
      </att>
    </graphics>
  </node>
  <node id="40429" label="ENSMUSG00000015850" cy:nodeId="186">
    <graphics z="0.0" y="315.95654296875" x="-0.08839797973632812">
      <att name="lockedVisualProperties" type="list" cy:type="List">
        <att name="NODE_LABEL" value="" type="string" cy:type="String"/>
      </att>
    </graphics>
  </node>
  <node id="40430" label="ENSMUSG00000058794" cy:nodeId="2236">
    <graphics z="0.0" y="334.25018310546875" x="317.68658447265625">
      <att name="lockedVisualProperties" type="list" cy:type="List">
        <att name="NODE_LABEL" value="" type="string" cy:type="String"/>
      </att>
    </graphics>
  </node>
  <node id="40431" label="ENSMUSG00000011008" cy:nodeId="1214">
    <graphics z="0.0" y="568.063232421875" x="28.989097595214844">
      <att name="lockedVisualProperties" type="list" cy:type="List">
        <att name="NODE_LABEL" value="" type="string" cy:type="String"/>
      </att>
    </graphics>
  </node>
  <node id="40432" label="ENSMUSG00000011034" cy:nodeId="1215">
    <graphics z="0.0" y="459.24444580078125" x="366.94903564453125">
      <att name="lockedVisualProperties" type="list" cy:type="List">
        <att name="NODE_LABEL" value="" type="string" cy:type="String"/>
      </att>
    </graphics>
  </node>
  <node id="40433" label="ENSMUSG00000016758" cy:nodeId="191">
    <graphics z="0.0" y="452.0777587890625" x="-78.1358871459961">
      <att name="lockedVisualProperties" type="list" cy:type="List">
        <att name="NODE_LABEL" value="" type="string" cy:type="String"/>
      </att>
    </graphics>
  </node>
  <node id="40434" label="ENSMUSG00000017165" cy:nodeId="193">
    <graphics z="0.0" y="523.067626953125" x="115.51765441894531">
      <att name="lockedVisualProperties" type="list" cy:type="List">
        <att name="NODE_LABEL" value="" type="string" cy:type="String"/>
      </att>
    </graphics>
  </node>
  <node id="40435" label="ENSMUSG00000059713" cy:nodeId="2243">
    <graphics z="0.0" y="530.1123657226562" x="-39.11772155761719">
      <att name="lockedVisualProperties" type="list" cy:type="List">
        <att name="NODE_LABEL" value="" type="string" cy:type="String"/>
      </att>
    </graphics>
  </node>
  <node id="40436" label="ENSMUSG00000017446" cy:nodeId="195">
    <graphics z="0.0" y="303.0897521972656" x="272.8904724121094">
      <att name="lockedVisualProperties" type="list" cy:type="List">
        <att name="NODE_LABEL" value="" type="string" cy:type="String"/>
      </att>
    </graphics>
  </node>
  <node id="40437" label="ENSMUSG00000017466" cy:nodeId="196">
    <graphics z="0.0" y="463.54473876953125" x="374.29315185546875">
      <att name="lockedVisualProperties" type="list" cy:type="List">
        <att name="NODE_LABEL" value="" type="string" cy:type="String"/>
      </att>
    </graphics>
  </node>
  <node id="40438" label="ENSMUSG00000017692" cy:nodeId="198">
    <graphics z="0.0" y="402.8467102050781" x="442.7338562011719">
      <att name="lockedVisualProperties" type="list" cy:type="List">
        <att name="NODE_LABEL" value="" type="string" cy:type="String"/>
      </att>
    </graphics>
  </node>
  <node id="40439" label="ENSMUSG00000017716" cy:nodeId="199">
    <graphics z="0.0" y="327.5496826171875" x="363.5928649902344">
      <att name="lockedVisualProperties" type="list" cy:type="List">
        <att name="NODE_LABEL" value="" type="string" cy:type="String"/>
      </att>
    </graphics>
  </node>
  <node id="40440" label="ENSMUSG00000014599" cy:nodeId="1223">
    <graphics z="0.0" y="340.5917663574219" x="376.89794921875">
      <att name="lockedVisualProperties" type="list" cy:type="List">
        <att name="NODE_LABEL" value="" type="string" cy:type="String"/>
      </att>
    </graphics>
  </node>
  <node id="40441" label="ENSMUSG00000060548" cy:nodeId="2248">
    <graphics z="0.0" y="500.6103515625" x="209.6978759765625">
      <att name="lockedVisualProperties" type="list" cy:type="List">
        <att name="NODE_LABEL" value="" type="string" cy:type="String"/>
      </att>
    </graphics>
  </node>
  <node id="40442" label="ENSMUSG00000018042" cy:nodeId="201">
    <graphics z="0.0" y="295.3449401855469" x="554.334228515625">
      <att name="lockedVisualProperties" type="list" cy:type="List">
        <att name="NODE_LABEL" value="" type="string" cy:type="String"/>
      </att>
    </graphics>
  </node>
  <node id="40443" label="ENSMUSG00000060550" cy:nodeId="2249">
    <graphics z="0.0" y="199.04443359375" x="-45.97413635253906">
      <att name="lockedVisualProperties" type="list" cy:type="List">
        <att name="NODE_LABEL" value="" type="string" cy:type="String"/>
      </att>
    </graphics>
  </node>
  <node id="40444" label="ENSMUSG00000018334" cy:nodeId="202">
    <graphics z="0.0" y="77.94512176513672" x="365.48773193359375">
      <att name="lockedVisualProperties" type="list" cy:type="List">
        <att name="NODE_LABEL" value="" type="string" cy:type="String"/>
      </att>
    </graphics>
  </node>
  <node id="40445" label="ENSMUSG00000018566" cy:nodeId="204">
    <graphics z="0.0" y="72.64290618896484" x="83.83366394042969">
      <att name="lockedVisualProperties" type="list" cy:type="List">
        <att name="NODE_LABEL" value="" type="string" cy:type="String"/>
      </att>
    </graphics>
  </node>
  <node id="40446" label="ENSMUSG00000060961" cy:nodeId="2254">
    <graphics z="0.0" y="415.2336730957031" x="-102.36137390136719">
      <att name="lockedVisualProperties" type="list" cy:type="List">
        <att name="NODE_LABEL" value="" type="string" cy:type="String"/>
      </att>
    </graphics>
  </node>
  <node id="40447" label="ENSMUSG00000061414" cy:nodeId="2256">
    <graphics z="0.0" y="108.54391479492188" x="262.948974609375">
      <att name="lockedVisualProperties" type="list" cy:type="List">
        <att name="NODE_LABEL" value="" type="string" cy:type="String"/>
      </att>
    </graphics>
  </node>
  <node id="40448" label="ENSMUSG00000018983" cy:nodeId="208">
    <graphics z="0.0" y="101.41649627685547" x="202.77114868164062">
      <att name="lockedVisualProperties" type="list" cy:type="List">
        <att name="NODE_LABEL" value="" type="string" cy:type="String"/>
      </att>
    </graphics>
  </node>
  <node id="40449" label="ENSMUSG00000019194" cy:nodeId="211">
    <graphics z="0.0" y="609.8701171875" x="98.59098815917969">
      <att name="lockedVisualProperties" type="list" cy:type="List">
        <att name="NODE_LABEL" value="" type="string" cy:type="String"/>
      </att>
    </graphics>
  </node>
  <node id="40450" label="ENSMUSG00000016541" cy:nodeId="1236">
    <graphics z="0.0" y="242.97540283203125" x="-16.051010131835938">
      <att name="lockedVisualProperties" type="list" cy:type="List">
        <att name="NODE_LABEL" value="" type="string" cy:type="String"/>
      </att>
    </graphics>
  </node>
  <node id="40451" label="ENSMUSG00000019564" cy:nodeId="212">
    <graphics z="0.0" y="556.1979370117188" x="133.0784454345703">
      <att name="lockedVisualProperties" type="list" cy:type="List">
        <att name="NODE_LABEL" value="" type="string" cy:type="String"/>
      </att>
    </graphics>
  </node>
  <node id="40452" label="ENSMUSG00000017453" cy:nodeId="1239">
    <graphics z="0.0" y="382.89703369140625" x="-48.74885559082031">
      <att name="lockedVisualProperties" type="list" cy:type="List">
        <att name="NODE_LABEL" value="" type="string" cy:type="String"/>
      </att>
    </graphics>
  </node>
  <node id="40453" label="ENSMUSG00000062312" cy:nodeId="2265">
    <graphics z="0.0" y="538.6613159179688" x="327.3397521972656">
      <att name="lockedVisualProperties" type="list" cy:type="List">
        <att name="NODE_LABEL" value="" type="string" cy:type="String"/>
      </att>
    </graphics>
  </node>
  <node id="40454" label="ENSMUSG00000019916" cy:nodeId="218">
    <graphics z="0.0" y="370.59295654296875" x="427.8635559082031">
      <att name="lockedVisualProperties" type="list" cy:type="List">
        <att name="NODE_LABEL" value="" type="string" cy:type="String"/>
      </att>
    </graphics>
  </node>
  <node id="40455" label="ENSMUSG00000019942" cy:nodeId="219">
    <graphics z="0.0" y="351.46331787109375" x="431.1252136230469">
      <att name="lockedVisualProperties" type="list" cy:type="List">
        <att name="NODE_LABEL" value="" type="string" cy:type="String"/>
      </att>
    </graphics>
  </node>
  <node id="40456" label="ENSMUSG00000062753" cy:nodeId="2268">
    <graphics z="0.0" y="678.060546875" x="-42.766387939453125">
      <att name="lockedVisualProperties" type="list" cy:type="List">
        <att name="NODE_LABEL" value="" type="string" cy:type="String"/>
      </att>
    </graphics>
  </node>
  <node id="40457" label="ENSMUSG00000019986" cy:nodeId="220">
    <graphics z="0.0" y="301.96075439453125" x="474.46075439453125">
      <att name="lockedVisualProperties" type="list" cy:type="List">
        <att name="NODE_LABEL" value="" type="string" cy:type="String"/>
      </att>
    </graphics>
  </node>
  <node id="40458" label="ENSMUSG00000020009" cy:nodeId="222">
    <graphics z="0.0" y="112.40377807617188" x="273.6337890625">
      <att name="lockedVisualProperties" type="list" cy:type="List">
        <att name="NODE_LABEL" value="" type="string" cy:type="String"/>
      </att>
    </graphics>
  </node>
  <node id="40459" label="ENSMUSG00000018411" cy:nodeId="1246">
    <graphics z="0.0" y="680.1708984375" x="-8.247688293457031">
      <att name="lockedVisualProperties" type="list" cy:type="List">
        <att name="NODE_LABEL" value="" type="string" cy:type="String"/>
      </att>
    </graphics>
  </node>
  <node id="40460" label="ENSMUSG00000020014" cy:nodeId="223">
    <graphics z="0.0" y="371.275390625" x="-25.593482971191406">
      <att name="lockedVisualProperties" type="list" cy:type="List">
        <att name="NODE_LABEL" value="" type="string" cy:type="String"/>
      </att>
    </graphics>
  </node>
  <node id="40461" label="ENSMUSG00000020015" cy:nodeId="224">
    <graphics z="0.0" y="152.26864624023438" x="392.10955810546875">
      <att name="lockedVisualProperties" type="list" cy:type="List">
        <att name="NODE_LABEL" value="" type="string" cy:type="String"/>
      </att>
    </graphics>
  </node>
  <node id="40462" label="ENSMUSG00000063568" cy:nodeId="2273">
    <graphics z="0.0" y="226.29293823242188" x="56.48853302001953">
      <att name="lockedVisualProperties" type="list" cy:type="List">
        <att name="NODE_LABEL" value="" type="string" cy:type="String"/>
      </att>
    </graphics>
  </node>
  <node id="40463" label="ENSMUSG00000018752" cy:nodeId="1251">
    <graphics z="0.0" y="597.0709228515625" x="142.92404174804688">
      <att name="lockedVisualProperties" type="list" cy:type="List">
        <att name="NODE_LABEL" value="" type="string" cy:type="String"/>
      </att>
    </graphics>
  </node>
  <node id="40464" label="ENSMUSG00000020277" cy:nodeId="227">
    <graphics z="0.0" y="87.30262756347656" x="182.1921844482422">
      <att name="lockedVisualProperties" type="list" cy:type="List">
        <att name="NODE_LABEL" value="" type="string" cy:type="String"/>
      </att>
    </graphics>
  </node>
  <node id="40465" label="ENSMUSG00000020363" cy:nodeId="230">
    <graphics z="0.0" y="80.9559326171875" x="229.94290161132812">
      <att name="lockedVisualProperties" type="list" cy:type="List">
        <att name="NODE_LABEL" value="" type="string" cy:type="String"/>
      </att>
    </graphics>
  </node>
  <node id="40466" label="ENSMUSG00000064140" cy:nodeId="2279">
    <graphics z="0.0" y="409.4530944824219" x="-50.427772521972656">
      <att name="lockedVisualProperties" type="list" cy:type="List">
        <att name="NODE_LABEL" value="" type="string" cy:type="String"/>
      </att>
    </graphics>
  </node>
  <node id="40467" label="ENSMUSG00000018906" cy:nodeId="1255">
    <graphics z="0.0" y="625.0839233398438" x="64.38833618164062">
      <att name="lockedVisualProperties" type="list" cy:type="List">
        <att name="NODE_LABEL" value="" type="string" cy:type="String"/>
      </att>
    </graphics>
  </node>
  <node id="40468" label="ENSMUSG00000020376" cy:nodeId="231">
    <graphics z="0.0" y="239.06277465820312" x="-3.955303192138672">
      <att name="lockedVisualProperties" type="list" cy:type="List">
        <att name="NODE_LABEL" value="" type="string" cy:type="String"/>
      </att>
    </graphics>
  </node>
  <node id="40469" label="ENSMUSG00000020407" cy:nodeId="233">
    <graphics z="0.0" y="542.888916015625" x="263.398681640625">
      <att name="lockedVisualProperties" type="list" cy:type="List">
        <att name="NODE_LABEL" value="" type="string" cy:type="String"/>
      </att>
    </graphics>
  </node>
  <node id="40470" label="ENSMUSG00000020471" cy:nodeId="235">
    <graphics z="0.0" y="346.0503845214844" x="410.0130615234375">
      <att name="lockedVisualProperties" type="list" cy:type="List">
        <att name="NODE_LABEL" value="" type="string" cy:type="String"/>
      </att>
    </graphics>
  </node>
  <node id="40471" label="ENSMUSG00000019232" cy:nodeId="1260">
    <graphics z="0.0" y="577.4578857421875" x="129.4058074951172">
      <att name="lockedVisualProperties" type="list" cy:type="List">
        <att name="NODE_LABEL" value="" type="string" cy:type="String"/>
      </att>
    </graphics>
  </node>
  <node id="40472" label="ENSMUSG00000064373" cy:nodeId="2285">
    <graphics z="0.0" y="205.1392364501953" x="92.21893310546875">
      <att name="lockedVisualProperties" type="list" cy:type="List">
        <att name="NODE_LABEL" value="" type="string" cy:type="String"/>
      </att>
    </graphics>
  </node>
  <node id="40473" label="ENSMUSG00000019838" cy:nodeId="1264">
    <graphics z="0.0" y="55.15550994873047" x="404.12890625">
      <att name="lockedVisualProperties" type="list" cy:type="List">
        <att name="NODE_LABEL" value="" type="string" cy:type="String"/>
      </att>
    </graphics>
  </node>
  <node id="40474" label="ENSMUSG00000020715" cy:nodeId="240">
    <graphics z="0.0" y="30.329391479492188" x="156.752197265625">
      <att name="lockedVisualProperties" type="list" cy:type="List">
        <att name="NODE_LABEL" value="" type="string" cy:type="String"/>
      </att>
    </graphics>
  </node>
  <node id="40475" label="ENSMUSG00000020741" cy:nodeId="241">
    <graphics z="0.0" y="463.13995361328125" x="-36.706573486328125">
      <att name="lockedVisualProperties" type="list" cy:type="List">
        <att name="NODE_LABEL" value="" type="string" cy:type="String"/>
      </att>
    </graphics>
  </node>
  <node id="40476" label="ENSMUSG00000020838" cy:nodeId="243">
    <graphics z="0.0" y="323.0704040527344" x="-80.32170867919922">
      <att name="lockedVisualProperties" type="list" cy:type="List">
        <att name="NODE_LABEL" value="" type="string" cy:type="String"/>
      </att>
    </graphics>
  </node>
  <node id="40477" label="ENSMUSG00000020872" cy:nodeId="245">
    <graphics z="0.0" y="639.4439697265625" x="319.431884765625">
      <att name="lockedVisualProperties" type="list" cy:type="List">
        <att name="NODE_LABEL" value="" type="string" cy:type="String"/>
      </att>
    </graphics>
  </node>
  <node id="40478" label="ENSMUSG00000020892" cy:nodeId="246">
    <graphics z="0.0" y="267.22113037109375" x="540.30224609375">
      <att name="lockedVisualProperties" type="list" cy:type="List">
        <att name="NODE_LABEL" value="" type="string" cy:type="String"/>
      </att>
    </graphics>
  </node>
  <node id="40479" label="ENSMUSG00000019945" cy:nodeId="1271">
    <graphics z="0.0" y="595.3656005859375" x="30.42560577392578">
      <att name="lockedVisualProperties" type="list" cy:type="List">
        <att name="NODE_LABEL" value="" type="string" cy:type="String"/>
      </att>
    </graphics>
  </node>
  <node id="40480" label="ENSMUSG00000020894" cy:nodeId="247">
    <graphics z="0.0" y="52.50305938720703" x="211.59429931640625">
      <att name="lockedVisualProperties" type="list" cy:type="List">
        <att name="NODE_LABEL" value="" type="string" cy:type="String"/>
      </att>
    </graphics>
  </node>
  <node id="40481" label="ENSMUSG00000020978" cy:nodeId="249">
    <graphics z="0.0" y="656.90185546875" x="170.24546813964844">
      <att name="lockedVisualProperties" type="list" cy:type="List">
        <att name="NODE_LABEL" value="" type="string" cy:type="String"/>
      </att>
    </graphics>
  </node>
  <node id="40482" label="ENSMUSG00000021094" cy:nodeId="250">
    <graphics z="0.0" y="18.338401794433594" x="336.2462463378906">
      <att name="lockedVisualProperties" type="list" cy:type="List">
        <att name="NODE_LABEL" value="" type="string" cy:type="String"/>
      </att>
    </graphics>
  </node>
  <node id="40483" label="ENSMUSG00000020034" cy:nodeId="1275">
    <graphics z="0.0" y="72.45185852050781" x="401.32952880859375">
      <att name="lockedVisualProperties" type="list" cy:type="List">
        <att name="NODE_LABEL" value="" type="string" cy:type="String"/>
      </att>
    </graphics>
  </node>
  <node id="40484" label="ENSMUSG00000021108" cy:nodeId="251">
    <graphics z="0.0" y="480.28302001953125" x="-48.574562072753906">
      <att name="lockedVisualProperties" type="list" cy:type="List">
        <att name="NODE_LABEL" value="" type="string" cy:type="String"/>
      </att>
    </graphics>
  </node>
  <node id="40485" label="ENSMUSG00000021185" cy:nodeId="252">
    <graphics z="0.0" y="174.5149688720703" x="-49.183807373046875">
      <att name="lockedVisualProperties" type="list" cy:type="List">
        <att name="NODE_LABEL" value="" type="string" cy:type="String"/>
      </att>
    </graphics>
  </node>
  <node id="40486" label="ENSMUSG00000067889" cy:nodeId="2300">
    <graphics z="0.0" y="59.47130584716797" x="467.0743713378906">
      <att name="lockedVisualProperties" type="list" cy:type="List">
        <att name="NODE_LABEL" value="" type="string" cy:type="String"/>
      </att>
    </graphics>
  </node>
  <node id="40487" label="ENSMUSG00000020092" cy:nodeId="1277">
    <graphics z="0.0" y="498.9139404296875" x="517.5494995117188">
      <att name="lockedVisualProperties" type="list" cy:type="List">
        <att name="NODE_LABEL" value="" type="string" cy:type="String"/>
      </att>
    </graphics>
  </node>
  <node id="40488" label="ENSMUSG00000021196" cy:nodeId="254">
    <graphics z="0.0" y="498.626953125" x="452.0650634765625">
      <att name="lockedVisualProperties" type="list" cy:type="List">
        <att name="NODE_LABEL" value="" type="string" cy:type="String"/>
      </att>
    </graphics>
  </node>
  <node id="40489" label="ENSMUSG00000068154" cy:nodeId="2302">
    <graphics z="0.0" y="378.70068359375" x="199.90914916992188">
      <att name="lockedVisualProperties" type="list" cy:type="List">
        <att name="NODE_LABEL" value="" type="string" cy:type="String"/>
      </att>
    </graphics>
  </node>
  <node id="40490" label="ENSMUSG00000021280" cy:nodeId="258">
    <graphics z="0.0" y="128.31459045410156" x="112.20159912109375">
      <att name="lockedVisualProperties" type="list" cy:type="List">
        <att name="NODE_LABEL" value="" type="string" cy:type="String"/>
      </att>
    </graphics>
  </node>
  <node id="40491" label="ENSMUSG00000020226" cy:nodeId="1282">
    <graphics z="0.0" y="534.2702026367188" x="478.732421875">
      <att name="lockedVisualProperties" type="list" cy:type="List">
        <att name="NODE_LABEL" value="" type="string" cy:type="String"/>
      </att>
    </graphics>
  </node>
  <node id="40492" label="ENSMUSG00000068587" cy:nodeId="2306">
    <graphics z="0.0" y="387.70025634765625" x="50.558555603027344">
      <att name="lockedVisualProperties" type="list" cy:type="List">
        <att name="NODE_LABEL" value="" type="string" cy:type="String"/>
      </att>
    </graphics>
  </node>
  <node id="40493" label="ENSMUSG00000021477" cy:nodeId="260">
    <graphics z="0.0" y="383.48089599609375" x="-82.30654907226562">
      <att name="lockedVisualProperties" type="list" cy:type="List">
        <att name="NODE_LABEL" value="" type="string" cy:type="String"/>
      </att>
    </graphics>
  </node>
  <node id="40494" label="ENSMUSG00000020230" cy:nodeId="1284">
    <graphics z="0.0" y="512.4036865234375" x="433.9239807128906">
      <att name="lockedVisualProperties" type="list" cy:type="List">
        <att name="NODE_LABEL" value="" type="string" cy:type="String"/>
      </att>
    </graphics>
  </node>
  <node id="40495" label="ENSMUSG00000068877" cy:nodeId="2308">
    <graphics z="0.0" y="24.708873748779297" x="357.6095275878906">
      <att name="lockedVisualProperties" type="list" cy:type="List">
        <att name="NODE_LABEL" value="" type="string" cy:type="String"/>
      </att>
    </graphics>
  </node>
  <node id="40496" label="ENSMUSG00000021539" cy:nodeId="261">
    <graphics z="0.0" y="20.294525146484375" x="104.76588439941406">
      <att name="lockedVisualProperties" type="list" cy:type="List">
        <att name="NODE_LABEL" value="" type="string" cy:type="String"/>
      </att>
    </graphics>
  </node>
  <node id="40497" label="ENSMUSG00000020261" cy:nodeId="1285">
    <graphics z="0.0" y="436.4885559082031" x="251.41217041015625">
      <att name="lockedVisualProperties" type="list" cy:type="List">
        <att name="NODE_LABEL" value="" type="string" cy:type="String"/>
      </att>
    </graphics>
  </node>
  <node id="40498" label="ENSMUSG00000020402" cy:nodeId="1289">
    <graphics z="0.0" y="369.3211364746094" x="105.77615356445312">
      <att name="lockedVisualProperties" type="list" cy:type="List">
        <att name="NODE_LABEL" value="" type="string" cy:type="String"/>
      </att>
    </graphics>
  </node>
  <node id="40499" label="ENSMUSG00000021806" cy:nodeId="266">
    <graphics z="0.0" y="105.68365478515625" x="60.651405334472656">
      <att name="lockedVisualProperties" type="list" cy:type="List">
        <att name="NODE_LABEL" value="" type="string" cy:type="String"/>
      </att>
    </graphics>
  </node>
  <node id="40500" label="ENSMUSG00000070332" cy:nodeId="2314">
    <graphics z="0.0" y="431.6748046875" x="394.4917297363281">
      <att name="lockedVisualProperties" type="list" cy:type="List">
        <att name="NODE_LABEL" value="" type="string" cy:type="String"/>
      </att>
    </graphics>
  </node>
  <node id="40501" label="ENSMUSG00000021822" cy:nodeId="267">
    <graphics z="0.0" y="541.5015869140625" x="142.6398468017578">
      <att name="lockedVisualProperties" type="list" cy:type="List">
        <att name="NODE_LABEL" value="" type="string" cy:type="String"/>
      </att>
    </graphics>
  </node>
  <node id="40502" label="ENSMUSG00000020435" cy:nodeId="1291">
    <graphics z="0.0" y="425.1106262207031" x="171.41067504882812">
      <att name="lockedVisualProperties" type="list" cy:type="List">
        <att name="NODE_LABEL" value="" type="string" cy:type="String"/>
      </att>
    </graphics>
  </node>
  <node id="40503" label="ENSMUSG00000021831" cy:nodeId="268">
    <graphics z="0.0" y="291.1884460449219" x="410.6210021972656">
      <att name="lockedVisualProperties" type="list" cy:type="List">
        <att name="NODE_LABEL" value="" type="string" cy:type="String"/>
      </att>
    </graphics>
  </node>
  <node id="40504" label="ENSMUSG00000021876" cy:nodeId="269">
    <graphics z="0.0" y="436.0693359375" x="4.456745147705078">
      <att name="lockedVisualProperties" type="list" cy:type="List">
        <att name="NODE_LABEL" value="" type="string" cy:type="String"/>
      </att>
    </graphics>
  </node>
  <node id="40505" label="ENSMUSG00000021947" cy:nodeId="270">
    <graphics z="0.0" y="616.8467407226562" x="-112.87161254882812">
      <att name="lockedVisualProperties" type="list" cy:type="List">
        <att name="NODE_LABEL" value="" type="string" cy:type="String"/>
      </att>
    </graphics>
  </node>
  <node id="40506" label="ENSMUSG00000021957" cy:nodeId="271">
    <graphics z="0.0" y="476.0209045410156" x="329.2280578613281">
      <att name="lockedVisualProperties" type="list" cy:type="List">
        <att name="NODE_LABEL" value="" type="string" cy:type="String"/>
      </att>
    </graphics>
  </node>
  <node id="40507" label="ENSMUSG00000020472" cy:nodeId="1296">
    <graphics z="0.0" y="441.3136291503906" x="556.2683715820312">
      <att name="lockedVisualProperties" type="list" cy:type="List">
        <att name="NODE_LABEL" value="" type="string" cy:type="String"/>
      </att>
    </graphics>
  </node>
  <node id="40508" label="ENSMUSG00000022094" cy:nodeId="275">
    <graphics z="0.0" y="401.5491027832031" x="510.15216064453125">
      <att name="lockedVisualProperties" type="list" cy:type="List">
        <att name="NODE_LABEL" value="" type="string" cy:type="String"/>
      </att>
    </graphics>
  </node>
  <node id="40509" label="ENSMUSG00000022136" cy:nodeId="276">
    <graphics z="0.0" y="249.771240234375" x="45.332054138183594">
      <att name="lockedVisualProperties" type="list" cy:type="List">
        <att name="NODE_LABEL" value="" type="string" cy:type="String"/>
      </att>
    </graphics>
  </node>
  <node id="40510" label="ENSMUSG00000022148" cy:nodeId="277">
    <graphics z="0.0" y="654.5101318359375" x="191.4835968017578">
      <att name="lockedVisualProperties" type="list" cy:type="List">
        <att name="NODE_LABEL" value="" type="string" cy:type="String"/>
      </att>
    </graphics>
  </node>
  <node id="40511" label="ENSMUSG00000022208" cy:nodeId="279">
    <graphics z="0.0" y="603.68115234375" x="379.0351867675781">
      <att name="lockedVisualProperties" type="list" cy:type="List">
        <att name="NODE_LABEL" value="" type="string" cy:type="String"/>
      </att>
    </graphics>
  </node>
  <node id="40512" label="ENSMUSG00000072849" cy:nodeId="2327">
    <graphics z="0.0" y="579.0107421875" x="199.24050903320312">
      <att name="lockedVisualProperties" type="list" cy:type="List">
        <att name="NODE_LABEL" value="" type="string" cy:type="String"/>
      </att>
    </graphics>
  </node>
  <node id="40513" label="ENSMUSG00000022217" cy:nodeId="280">
    <graphics z="0.0" y="86.05554962158203" x="-11.721450805664062">
      <att name="lockedVisualProperties" type="list" cy:type="List">
        <att name="NODE_LABEL" value="" type="string" cy:type="String"/>
      </att>
    </graphics>
  </node>
  <node id="40514" label="ENSMUSG00000022235" cy:nodeId="282">
    <graphics z="0.0" y="363.5899353027344" x="540.358154296875">
      <att name="lockedVisualProperties" type="list" cy:type="List">
        <att name="NODE_LABEL" value="" type="string" cy:type="String"/>
      </att>
    </graphics>
  </node>
  <node id="40515" label="ENSMUSG00000022253" cy:nodeId="283">
    <graphics z="0.0" y="64.72257232666016" x="260.3377990722656">
      <att name="lockedVisualProperties" type="list" cy:type="List">
        <att name="NODE_LABEL" value="" type="string" cy:type="String"/>
      </att>
    </graphics>
  </node>
  <node id="40516" label="ENSMUSG00000020875" cy:nodeId="1309">
    <graphics z="0.0" y="91.3121109008789" x="53.60057067871094">
      <att name="lockedVisualProperties" type="list" cy:type="List">
        <att name="NODE_LABEL" value="" type="string" cy:type="String"/>
      </att>
    </graphics>
  </node>
  <node id="40517" label="ENSMUSG00000020900" cy:nodeId="1310">
    <graphics z="0.0" y="408.2293701171875" x="558.3656616210938">
      <att name="lockedVisualProperties" type="list" cy:type="List">
        <att name="NODE_LABEL" value="" type="string" cy:type="String"/>
      </att>
    </graphics>
  </node>
  <node id="40518" label="ENSMUSG00000022364" cy:nodeId="286">
    <graphics z="0.0" y="588.5460205078125" x="305.4957580566406">
      <att name="lockedVisualProperties" type="list" cy:type="List">
        <att name="NODE_LABEL" value="" type="string" cy:type="String"/>
      </att>
    </graphics>
  </node>
  <node id="40519" label="ENSMUSG00000022546" cy:nodeId="289">
    <graphics z="0.0" y="430.97723388671875" x="250.38314819335938">
      <att name="lockedVisualProperties" type="list" cy:type="List">
        <att name="NODE_LABEL" value="" type="string" cy:type="String"/>
      </att>
    </graphics>
  </node>
  <node id="40520" label="ENSMUSG00000022555" cy:nodeId="290">
    <graphics z="0.0" y="346.325927734375" x="364.9143371582031">
      <att name="lockedVisualProperties" type="list" cy:type="List">
        <att name="NODE_LABEL" value="" type="string" cy:type="String"/>
      </att>
    </graphics>
  </node>
  <node id="40521" label="ENSMUSG00000022629" cy:nodeId="291">
    <graphics z="0.0" y="560.8908081054688" x="323.32586669921875">
      <att name="lockedVisualProperties" type="list" cy:type="List">
        <att name="NODE_LABEL" value="" type="string" cy:type="String"/>
      </att>
    </graphics>
  </node>
  <node id="40522" label="ENSMUSG00000021221" cy:nodeId="1320">
    <graphics z="0.0" y="49.224769592285156" x="122.59483337402344">
      <att name="lockedVisualProperties" type="list" cy:type="List">
        <att name="NODE_LABEL" value="" type="string" cy:type="String"/>
      </att>
    </graphics>
  </node>
  <node id="40523" label="ENSMUSG00000074218" cy:nodeId="2344">
    <graphics z="0.0" y="548.693603515625" x="429.4290771484375">
      <att name="lockedVisualProperties" type="list" cy:type="List">
        <att name="NODE_LABEL" value="" type="string" cy:type="String"/>
      </att>
    </graphics>
  </node>
  <node id="40524" label="ENSMUSG00000022836" cy:nodeId="297">
    <graphics z="0.0" y="445.91448974609375" x="544.6468505859375">
      <att name="lockedVisualProperties" type="list" cy:type="List">
        <att name="NODE_LABEL" value="" type="string" cy:type="String"/>
      </att>
    </graphics>
  </node>
  <node id="40525" label="ENSMUSG00000022864" cy:nodeId="299">
    <graphics z="0.0" y="341.98663330078125" x="554.4535522460938">
      <att name="lockedVisualProperties" type="list" cy:type="List">
        <att name="NODE_LABEL" value="" type="string" cy:type="String"/>
      </att>
    </graphics>
  </node>
  <node id="40526" label="ENSMUSG00000021364" cy:nodeId="1324">
    <graphics z="0.0" y="499.446533203125" x="485.12109375">
      <att name="lockedVisualProperties" type="list" cy:type="List">
        <att name="NODE_LABEL" value="" type="string" cy:type="String"/>
      </att>
    </graphics>
  </node>
  <node id="40527" label="ENSMUSG00000022947" cy:nodeId="301">
    <graphics z="0.0" y="363.7713928222656" x="400.5013122558594">
      <att name="lockedVisualProperties" type="list" cy:type="List">
        <att name="NODE_LABEL" value="" type="string" cy:type="String"/>
      </att>
    </graphics>
  </node>
  <node id="40528" label="ENSMUSG00000021453" cy:nodeId="1325">
    <graphics z="0.0" y="205.11724853515625" x="211.63499450683594">
      <att name="lockedVisualProperties" type="list" cy:type="List">
        <att name="NODE_LABEL" value="" type="string" cy:type="String"/>
      </att>
    </graphics>
  </node>
  <node id="40529" label="ENSMUSG00000022995" cy:nodeId="302">
    <graphics z="0.0" y="381.0592041015625" x="149.65335083007812">
      <att name="lockedVisualProperties" type="list" cy:type="List">
        <att name="NODE_LABEL" value="" type="string" cy:type="String"/>
      </att>
    </graphics>
  </node>
  <node id="40530" label="ENSMUSG00000023008" cy:nodeId="304">
    <graphics z="0.0" y="355.9573974609375" x="547.1302490234375">
      <att name="lockedVisualProperties" type="list" cy:type="List">
        <att name="NODE_LABEL" value="" type="string" cy:type="String"/>
      </att>
    </graphics>
  </node>
  <node id="40531" label="ENSMUSG00000021559" cy:nodeId="1328">
    <graphics z="0.0" y="295.2475891113281" x="351.0975036621094">
      <att name="lockedVisualProperties" type="list" cy:type="List">
        <att name="NODE_LABEL" value="" type="string" cy:type="String"/>
      </att>
    </graphics>
  </node>
  <node id="40532" label="ENSMUSG00000023017" cy:nodeId="306">
    <graphics z="0.0" y="474.1427917480469" x="99.47711181640625">
      <att name="lockedVisualProperties" type="list" cy:type="List">
        <att name="NODE_LABEL" value="" type="string" cy:type="String"/>
      </att>
    </graphics>
  </node>
  <node id="40533" label="ENSMUSG00000074715" cy:nodeId="2354">
    <graphics z="0.0" y="204.85023498535156" x="67.5694580078125">
      <att name="lockedVisualProperties" type="list" cy:type="List">
        <att name="NODE_LABEL" value="" type="string" cy:type="String"/>
      </att>
    </graphics>
  </node>
  <node id="40534" label="ENSMUSG00000023032" cy:nodeId="307">
    <graphics z="0.0" y="589.66064453125" x="137.2022705078125">
      <att name="lockedVisualProperties" type="list" cy:type="List">
        <att name="NODE_LABEL" value="" type="string" cy:type="String"/>
      </att>
    </graphics>
  </node>
  <node id="40535" label="ENSMUSG00000074796" cy:nodeId="2355">
    <graphics z="0.0" y="10.074657440185547" x="178.8807830810547">
      <att name="lockedVisualProperties" type="list" cy:type="List">
        <att name="NODE_LABEL" value="" type="string" cy:type="String"/>
      </att>
    </graphics>
  </node>
  <node id="40536" label="ENSMUSG00000021684" cy:nodeId="1333">
    <graphics z="0.0" y="276.6856689453125" x="215.6917724609375">
      <att name="lockedVisualProperties" type="list" cy:type="List">
        <att name="NODE_LABEL" value="" type="string" cy:type="String"/>
      </att>
    </graphics>
  </node>
  <node id="40537" label="ENSMUSG00000075304" cy:nodeId="2362">
    <graphics z="0.0" y="287.20916748046875" x="270.5877685546875">
      <att name="lockedVisualProperties" type="list" cy:type="List">
        <att name="NODE_LABEL" value="" type="string" cy:type="String"/>
      </att>
    </graphics>
  </node>
  <node id="40538" label="ENSMUSG00000075702" cy:nodeId="2365">
    <graphics z="0.0" y="135.9491729736328" x="182.0550994873047">
      <att name="lockedVisualProperties" type="list" cy:type="List">
        <att name="NODE_LABEL" value="" type="string" cy:type="String"/>
      </att>
    </graphics>
  </node>
  <node id="40539" label="ENSMUSG00000021838" cy:nodeId="1341">
    <graphics z="0.0" y="164.12603759765625" x="275.13934326171875">
      <att name="lockedVisualProperties" type="list" cy:type="List">
        <att name="NODE_LABEL" value="" type="string" cy:type="String"/>
      </att>
    </graphics>
  </node>
  <node id="40540" label="ENSMUSG00000024074" cy:nodeId="321">
    <graphics z="0.0" y="585.2440795898438" x="198.47653198242188">
      <att name="lockedVisualProperties" type="list" cy:type="List">
        <att name="NODE_LABEL" value="" type="string" cy:type="String"/>
      </att>
    </graphics>
  </node>
  <node id="40541" label="ENSMUSG00000021986" cy:nodeId="1346">
    <graphics z="0.0" y="42.85470962524414" x="392.5455322265625">
      <att name="lockedVisualProperties" type="list" cy:type="List">
        <att name="NODE_LABEL" value="" type="string" cy:type="String"/>
      </att>
    </graphics>
  </node>
  <node id="40542" label="ENSMUSG00000078515" cy:nodeId="2372">
    <graphics z="0.0" y="431.05975341796875" x="-3.5659332275390625">
      <att name="lockedVisualProperties" type="list" cy:type="List">
        <att name="NODE_LABEL" value="" type="string" cy:type="String"/>
      </att>
    </graphics>
  </node>
  <node id="40543" label="ENSMUSG00000024193" cy:nodeId="325">
    <graphics z="0.0" y="165.72637939453125" x="-149.96017456054688">
      <att name="lockedVisualProperties" type="list" cy:type="List">
        <att name="NODE_LABEL" value="" type="string" cy:type="String"/>
      </att>
    </graphics>
  </node>
  <node id="40544" label="ENSMUSG00000078566" cy:nodeId="2373">
    <graphics z="0.0" y="495.96380615234375" x="116.19563293457031">
      <att name="lockedVisualProperties" type="list" cy:type="List">
        <att name="NODE_LABEL" value="" type="string" cy:type="String"/>
      </att>
    </graphics>
  </node>
  <node id="40545" label="ENSMUSG00000024232" cy:nodeId="326">
    <graphics z="0.0" y="531.6029052734375" x="-43.91847229003906">
      <att name="lockedVisualProperties" type="list" cy:type="List">
        <att name="NODE_LABEL" value="" type="string" cy:type="String"/>
      </att>
    </graphics>
  </node>
  <node id="40546" label="ENSMUSG00000024349" cy:nodeId="328">
    <graphics z="0.0" y="123.43966674804688" x="465.3373107910156">
      <att name="lockedVisualProperties" type="list" cy:type="List">
        <att name="NODE_LABEL" value="" type="string" cy:type="String"/>
      </att>
    </graphics>
  </node>
  <node id="40547" label="ENSMUSG00000022180" cy:nodeId="1353">
    <graphics z="0.0" y="75.64092254638672" x="460.7738342285156">
      <att name="lockedVisualProperties" type="list" cy:type="List">
        <att name="NODE_LABEL" value="" type="string" cy:type="String"/>
      </att>
    </graphics>
  </node>
  <node id="40548" label="ENSMUSG00000024378" cy:nodeId="330">
    <graphics z="0.0" y="177.92852783203125" x="128.94708251953125">
      <att name="lockedVisualProperties" type="list" cy:type="List">
        <att name="NODE_LABEL" value="" type="string" cy:type="String"/>
      </att>
    </graphics>
  </node>
  <node id="40549" label="ENSMUSG00000024516" cy:nodeId="332">
    <graphics z="0.0" y="83.7155990600586" x="274.03485107421875">
      <att name="lockedVisualProperties" type="list" cy:type="List">
        <att name="NODE_LABEL" value="" type="string" cy:type="String"/>
      </att>
    </graphics>
  </node>
  <node id="40550" label="ENSMUSG00000079057" cy:nodeId="2381">
    <graphics z="0.0" y="277.1447448730469" x="555.845458984375">
      <att name="lockedVisualProperties" type="list" cy:type="List">
        <att name="NODE_LABEL" value="" type="string" cy:type="String"/>
      </att>
    </graphics>
  </node>
  <node id="40551" label="ENSMUSG00000024552" cy:nodeId="334">
    <graphics z="0.0" y="147.41586303710938" x="225.11581420898438">
      <att name="lockedVisualProperties" type="list" cy:type="List">
        <att name="NODE_LABEL" value="" type="string" cy:type="String"/>
      </att>
    </graphics>
  </node>
  <node id="40552" label="ENSMUSG00000079471" cy:nodeId="2384">
    <graphics z="0.0" y="227.66322326660156" x="191.88314819335938">
      <att name="lockedVisualProperties" type="list" cy:type="List">
        <att name="NODE_LABEL" value="" type="string" cy:type="String"/>
      </att>
    </graphics>
  </node>
  <node id="40553" label="ENSMUSG00000024743" cy:nodeId="342">
    <graphics z="0.0" y="436.52471923828125" x="228.05963134765625">
      <att name="lockedVisualProperties" type="list" cy:type="List">
        <att name="NODE_LABEL" value="" type="string" cy:type="String"/>
      </att>
    </graphics>
  </node>
  <node id="40554" label="ENSMUSG00000024887" cy:nodeId="345">
    <graphics z="0.0" y="117.43753051757812" x="230.0205078125">
      <att name="lockedVisualProperties" type="list" cy:type="List">
        <att name="NODE_LABEL" value="" type="string" cy:type="String"/>
      </att>
    </graphics>
  </node>
  <node id="40555" label="ENSMUSG00000090891" cy:nodeId="2396">
    <graphics z="0.0" y="234.73098754882812" x="-60.128448486328125">
      <att name="lockedVisualProperties" type="list" cy:type="List">
        <att name="NODE_LABEL" value="" type="string" cy:type="String"/>
      </att>
    </graphics>
  </node>
  <node id="40556" label="ENSMUSG00000091813" cy:nodeId="2398">
    <graphics z="0.0" y="447.5273742675781" x="5.688880920410156">
      <att name="lockedVisualProperties" type="list" cy:type="List">
        <att name="NODE_LABEL" value="" type="string" cy:type="String"/>
      </att>
    </graphics>
  </node>
  <node id="40557" label="ENSMUSG00000022621" cy:nodeId="1376">
    <graphics z="0.0" y="586.834716796875" x="239.49322509765625">
      <att name="lockedVisualProperties" type="list" cy:type="List">
        <att name="NODE_LABEL" value="" type="string" cy:type="String"/>
      </att>
    </graphics>
  </node>
  <node id="40558" label="ENSMUSG00000025025" cy:nodeId="352">
    <graphics z="0.0" y="324.9315185546875" x="237.94671630859375">
      <att name="lockedVisualProperties" type="list" cy:type="List">
        <att name="NODE_LABEL" value="" type="string" cy:type="String"/>
      </att>
    </graphics>
  </node>
  <node id="40559" label="ENSMUSG00000025037" cy:nodeId="354">
    <graphics z="0.0" y="79.93999481201172" x="428.9881286621094">
      <att name="lockedVisualProperties" type="list" cy:type="List">
        <att name="NODE_LABEL" value="" type="string" cy:type="String"/>
      </att>
    </graphics>
  </node>
  <node id="40560" label="ENSMUSG00000022707" cy:nodeId="1379">
    <graphics z="0.0" y="546.3426513671875" x="406.48687744140625">
      <att name="lockedVisualProperties" type="list" cy:type="List">
        <att name="NODE_LABEL" value="" type="string" cy:type="String"/>
      </att>
    </graphics>
  </node>
  <node id="40561" label="ENSMUSG00000025176" cy:nodeId="356">
    <graphics z="0.0" y="155.65306091308594" x="505.89862060546875">
      <att name="lockedVisualProperties" type="list" cy:type="List">
        <att name="NODE_LABEL" value="" type="string" cy:type="String"/>
      </att>
    </graphics>
  </node>
  <node id="40562" label="ENSMUSG00000025477" cy:nodeId="362">
    <graphics z="0.0" y="553.8230590820312" x="267.3500061035156">
      <att name="lockedVisualProperties" type="list" cy:type="List">
        <att name="NODE_LABEL" value="" type="string" cy:type="String"/>
      </att>
    </graphics>
  </node>
  <node id="40563" label="ENSMUSG00000022900" cy:nodeId="1386">
    <graphics z="0.0" y="54.23895263671875" x="139.2202911376953">
      <att name="lockedVisualProperties" type="list" cy:type="List">
        <att name="NODE_LABEL" value="" type="string" cy:type="String"/>
      </att>
    </graphics>
  </node>
  <node id="40564" label="ENSMUSG00000022938" cy:nodeId="1387">
    <graphics z="0.0" y="291.4627685546875" x="446.7975158691406">
      <att name="lockedVisualProperties" type="list" cy:type="List">
        <att name="NODE_LABEL" value="" type="string" cy:type="String"/>
      </att>
    </graphics>
  </node>
  <node id="40565" label="ENSMUSG00000098715" cy:nodeId="2412">
    <graphics z="0.0" y="129.3360595703125" x="327.690673828125">
      <att name="lockedVisualProperties" type="list" cy:type="List">
        <att name="NODE_LABEL" value="" type="string" cy:type="String"/>
      </att>
    </graphics>
  </node>
  <node id="40566" label="ENSMUSG00000023043" cy:nodeId="1389">
    <graphics z="0.0" y="323.5740661621094" x="-30.96978759765625">
      <att name="lockedVisualProperties" type="list" cy:type="List">
        <att name="NODE_LABEL" value="" type="string" cy:type="String"/>
      </att>
    </graphics>
  </node>
  <node id="40567" label="ENSMUSG00000109946" cy:nodeId="2415">
    <graphics z="0.0" y="345.4701232910156" x="-96.79287719726562">
      <att name="lockedVisualProperties" type="list" cy:type="List">
        <att name="NODE_LABEL" value="" type="string" cy:type="String"/>
      </att>
    </graphics>
  </node>
  <node id="40568" label="ENSMUSG00000023122" cy:nodeId="1394">
    <graphics z="0.0" y="498.3555908203125" x="540.5824584960938">
      <att name="lockedVisualProperties" type="list" cy:type="List">
        <att name="NODE_LABEL" value="" type="string" cy:type="String"/>
      </att>
    </graphics>
  </node>
  <node id="40569" label="ENSMUSG00000025780" cy:nodeId="370">
    <graphics z="0.0" y="289.1595764160156" x="239.97323608398438">
      <att name="lockedVisualProperties" type="list" cy:type="List">
        <att name="NODE_LABEL" value="" type="string" cy:type="String"/>
      </att>
    </graphics>
  </node>
  <node id="40570" label="ENSMUSG00000025893" cy:nodeId="372">
    <graphics z="0.0" y="164.33193969726562" x="246.47479248046875">
      <att name="lockedVisualProperties" type="list" cy:type="List">
        <att name="NODE_LABEL" value="" type="string" cy:type="String"/>
      </att>
    </graphics>
  </node>
  <node id="40571" label="ENSMUSG00000025921" cy:nodeId="373">
    <graphics z="0.0" y="572.0635375976562" x="42.91571044921875">
      <att name="lockedVisualProperties" type="list" cy:type="List">
        <att name="NODE_LABEL" value="" type="string" cy:type="String"/>
      </att>
    </graphics>
  </node>
  <node id="40572" label="ENSMUSG00000025959" cy:nodeId="374">
    <graphics z="0.0" y="593.52197265625" x="397.1322021484375">
      <att name="lockedVisualProperties" type="list" cy:type="List">
        <att name="NODE_LABEL" value="" type="string" cy:type="String"/>
      </att>
    </graphics>
  </node>
  <node id="40573" label="ENSMUSG00000026072" cy:nodeId="377">
    <graphics z="0.0" y="291.5793151855469" x="-104.92919921875">
      <att name="lockedVisualProperties" type="list" cy:type="List">
        <att name="NODE_LABEL" value="" type="string" cy:type="String"/>
      </att>
    </graphics>
  </node>
  <node id="40574" label="ENSMUSG00000026103" cy:nodeId="379">
    <graphics z="0.0" y="548.0682983398438" x="470.77490234375">
      <att name="lockedVisualProperties" type="list" cy:type="List">
        <att name="NODE_LABEL" value="" type="string" cy:type="String"/>
      </att>
    </graphics>
  </node>
  <node id="40575" label="ENSMUSG00000026107" cy:nodeId="380">
    <graphics z="0.0" y="540.52587890625" x="-6.984649658203125">
      <att name="lockedVisualProperties" type="list" cy:type="List">
        <att name="NODE_LABEL" value="" type="string" cy:type="String"/>
      </att>
    </graphics>
  </node>
  <node id="40576" label="ENSMUSG00000024013" cy:nodeId="1406">
    <graphics z="0.0" y="17.4193115234375" x="134.5840606689453">
      <att name="lockedVisualProperties" type="list" cy:type="List">
        <att name="NODE_LABEL" value="" type="string" cy:type="String"/>
      </att>
    </graphics>
  </node>
  <node id="40577" label="ENSMUSG00000024066" cy:nodeId="1412">
    <graphics z="0.0" y="167.67933654785156" x="290.5889892578125">
      <att name="lockedVisualProperties" type="list" cy:type="List">
        <att name="NODE_LABEL" value="" type="string" cy:type="String"/>
      </att>
    </graphics>
  </node>
  <node id="40578" label="ENSMUSG00000026509" cy:nodeId="389">
    <graphics z="0.0" y="555.3857421875" x="158.36923217773438">
      <att name="lockedVisualProperties" type="list" cy:type="List">
        <att name="NODE_LABEL" value="" type="string" cy:type="String"/>
      </att>
    </graphics>
  </node>
  <node id="40579" label="ENSMUSG00000026520" cy:nodeId="390">
    <graphics z="0.0" y="135.15057373046875" x="-8.175529479980469">
      <att name="lockedVisualProperties" type="list" cy:type="List">
        <att name="NODE_LABEL" value="" type="string" cy:type="String"/>
      </att>
    </graphics>
  </node>
  <node id="40580" label="ENSMUSG00000024124" cy:nodeId="1414">
    <graphics z="0.0" y="617.4881591796875" x="225.889892578125">
      <att name="lockedVisualProperties" type="list" cy:type="List">
        <att name="NODE_LABEL" value="" type="string" cy:type="String"/>
      </att>
    </graphics>
  </node>
  <node id="40581" label="ENSMUSG00000026604" cy:nodeId="392">
    <graphics z="0.0" y="579.237548828125" x="459.70880126953125">
      <att name="lockedVisualProperties" type="list" cy:type="List">
        <att name="NODE_LABEL" value="" type="string" cy:type="String"/>
      </att>
    </graphics>
  </node>
  <node id="40582" label="ENSMUSG00000026605" cy:nodeId="393">
    <graphics z="0.0" y="639.0899047851562" x="294.24951171875">
      <att name="lockedVisualProperties" type="list" cy:type="List">
        <att name="NODE_LABEL" value="" type="string" cy:type="String"/>
      </att>
    </graphics>
  </node>
  <node id="40583" label="ENSMUSG00000026649" cy:nodeId="394">
    <graphics z="0.0" y="353.49005126953125" x="300.8271789550781">
      <att name="lockedVisualProperties" type="list" cy:type="List">
        <att name="NODE_LABEL" value="" type="string" cy:type="String"/>
      </att>
    </graphics>
  </node>
  <node id="40584" label="ENSMUSG00000026730" cy:nodeId="395">
    <graphics z="0.0" y="302.2273254394531" x="321.1422424316406">
      <att name="lockedVisualProperties" type="list" cy:type="List">
        <att name="NODE_LABEL" value="" type="string" cy:type="String"/>
      </att>
    </graphics>
  </node>
  <node id="40585" label="ENSMUSG00000026782" cy:nodeId="396">
    <graphics z="0.0" y="539.4938354492188" x="486.86370849609375">
      <att name="lockedVisualProperties" type="list" cy:type="List">
        <att name="NODE_LABEL" value="" type="string" cy:type="String"/>
      </att>
    </graphics>
  </node>
  <node id="40586" label="ENSMUSG00000024354" cy:nodeId="1422">
    <graphics z="0.0" y="211.68673706054688" x="-67.38983917236328">
      <att name="lockedVisualProperties" type="list" cy:type="List">
        <att name="NODE_LABEL" value="" type="string" cy:type="String"/>
      </att>
    </graphics>
  </node>
  <node id="40587" label="ENSMUSG00000026879" cy:nodeId="398">
    <graphics z="0.0" y="402.9056701660156" x="-71.61836242675781">
      <att name="lockedVisualProperties" type="list" cy:type="List">
        <att name="NODE_LABEL" value="" type="string" cy:type="String"/>
      </att>
    </graphics>
  </node>
  <node id="40588" label="ENSMUSG00000026880" cy:nodeId="399">
    <graphics z="0.0" y="381.7677307128906" x="518.0001220703125">
      <att name="lockedVisualProperties" type="list" cy:type="List">
        <att name="NODE_LABEL" value="" type="string" cy:type="String"/>
      </att>
    </graphics>
  </node>
  <node id="40589" label="ENSMUSG00000026921" cy:nodeId="400">
    <graphics z="0.0" y="137.38522338867188" x="459.85205078125">
      <att name="lockedVisualProperties" type="list" cy:type="List">
        <att name="NODE_LABEL" value="" type="string" cy:type="String"/>
      </att>
    </graphics>
  </node>
  <node id="40590" label="ENSMUSG00000027006" cy:nodeId="404">
    <graphics z="0.0" y="584.7614135742188" x="349.19635009765625">
      <att name="lockedVisualProperties" type="list" cy:type="List">
        <att name="NODE_LABEL" value="" type="string" cy:type="String"/>
      </att>
    </graphics>
  </node>
  <node id="40591" label="ENSMUSG00000027313" cy:nodeId="407">
    <graphics z="0.0" y="248.53384399414062" x="86.84535217285156">
      <att name="lockedVisualProperties" type="list" cy:type="List">
        <att name="NODE_LABEL" value="" type="string" cy:type="String"/>
      </att>
    </graphics>
  </node>
  <node id="40592" label="ENSMUSG00000027333" cy:nodeId="409">
    <graphics z="0.0" y="230.77786254882812" x="222.7301025390625">
      <att name="lockedVisualProperties" type="list" cy:type="List">
        <att name="NODE_LABEL" value="" type="string" cy:type="String"/>
      </att>
    </graphics>
  </node>
  <node id="40593" label="ENSMUSG00000024525" cy:nodeId="1433">
    <graphics z="0.0" y="231.84959411621094" x="415.5902099609375">
      <att name="lockedVisualProperties" type="list" cy:type="List">
        <att name="NODE_LABEL" value="" type="string" cy:type="String"/>
      </att>
    </graphics>
  </node>
  <node id="40594" label="ENSMUSG00000027358" cy:nodeId="410">
    <graphics z="0.0" y="451.65728759765625" x="499.49896240234375">
      <att name="lockedVisualProperties" type="list" cy:type="List">
        <att name="NODE_LABEL" value="" type="string" cy:type="String"/>
      </att>
    </graphics>
  </node>
  <node id="40595" label="ENSMUSG00000024601" cy:nodeId="1436">
    <graphics z="0.0" y="97.71725463867188" x="160.08978271484375">
      <att name="lockedVisualProperties" type="list" cy:type="List">
        <att name="NODE_LABEL" value="" type="string" cy:type="String"/>
      </att>
    </graphics>
  </node>
  <node id="40596" label="ENSMUSG00000024665" cy:nodeId="1438">
    <graphics z="0.0" y="473.41827392578125" x="142.587158203125">
      <att name="lockedVisualProperties" type="list" cy:type="List">
        <att name="NODE_LABEL" value="" type="string" cy:type="String"/>
      </att>
    </graphics>
  </node>
  <node id="40597" label="ENSMUSG00000027514" cy:nodeId="415">
    <graphics z="0.0" y="275.0849304199219" x="498.7235107421875">
      <att name="lockedVisualProperties" type="list" cy:type="List">
        <att name="NODE_LABEL" value="" type="string" cy:type="String"/>
      </att>
    </graphics>
  </node>
  <node id="40598" label="ENSMUSG00000027534" cy:nodeId="416">
    <graphics z="0.0" y="546.8409423828125" x="395.72344970703125">
      <att name="lockedVisualProperties" type="list" cy:type="List">
        <att name="NODE_LABEL" value="" type="string" cy:type="String"/>
      </att>
    </graphics>
  </node>
  <node id="40599" label="ENSMUSG00000024774" cy:nodeId="1442">
    <graphics z="0.0" y="103.91169738769531" x="120.33876037597656">
      <att name="lockedVisualProperties" type="list" cy:type="List">
        <att name="NODE_LABEL" value="" type="string" cy:type="String"/>
      </att>
    </graphics>
  </node>
  <node id="40600" label="ENSMUSG00000024803" cy:nodeId="1443">
    <graphics z="0.0" y="57.136924743652344" x="79.4130859375">
      <att name="lockedVisualProperties" type="list" cy:type="List">
        <att name="NODE_LABEL" value="" type="string" cy:type="String"/>
      </att>
    </graphics>
  </node>
  <node id="40601" label="ENSMUSG00000027746" cy:nodeId="421">
    <graphics z="0.0" y="157.5782012939453" x="199.88926696777344">
      <att name="lockedVisualProperties" type="list" cy:type="List">
        <att name="NODE_LABEL" value="" type="string" cy:type="String"/>
      </att>
    </graphics>
  </node>
  <node id="40602" label="ENSMUSG00000027750" cy:nodeId="422">
    <graphics z="0.0" y="310.28271484375" x="-68.30805969238281">
      <att name="lockedVisualProperties" type="list" cy:type="List">
        <att name="NODE_LABEL" value="" type="string" cy:type="String"/>
      </att>
    </graphics>
  </node>
  <node id="40603" label="ENSMUSG00000024846" cy:nodeId="1446">
    <graphics z="0.0" y="95.98245239257812" x="10.357276916503906">
      <att name="lockedVisualProperties" type="list" cy:type="List">
        <att name="NODE_LABEL" value="" type="string" cy:type="String"/>
      </att>
    </graphics>
  </node>
  <node id="40604" label="ENSMUSG00000027883" cy:nodeId="424">
    <graphics z="0.0" y="264.82342529296875" x="282.25189208984375">
      <att name="lockedVisualProperties" type="list" cy:type="List">
        <att name="NODE_LABEL" value="" type="string" cy:type="String"/>
      </att>
    </graphics>
  </node>
  <node id="40605" label="ENSMUSG00000027890" cy:nodeId="425">
    <graphics z="0.0" y="643.5755004882812" x="236.59539794921875">
      <att name="lockedVisualProperties" type="list" cy:type="List">
        <att name="NODE_LABEL" value="" type="string" cy:type="String"/>
      </att>
    </graphics>
  </node>
  <node id="40606" label="ENSMUSG00000027907" cy:nodeId="426">
    <graphics z="0.0" y="395.0797119140625" x="425.203125">
      <att name="lockedVisualProperties" type="list" cy:type="List">
        <att name="NODE_LABEL" value="" type="string" cy:type="String"/>
      </att>
    </graphics>
  </node>
  <node id="40607" label="ENSMUSG00000027931" cy:nodeId="427">
    <graphics z="0.0" y="181.7040252685547" x="509.840087890625">
      <att name="lockedVisualProperties" type="list" cy:type="List">
        <att name="NODE_LABEL" value="" type="string" cy:type="String"/>
      </att>
    </graphics>
  </node>
  <node id="40608" label="ENSMUSG00000024981" cy:nodeId="1453">
    <graphics z="0.0" y="421.22674560546875" x="254.25872802734375">
      <att name="lockedVisualProperties" type="list" cy:type="List">
        <att name="NODE_LABEL" value="" type="string" cy:type="String"/>
      </att>
    </graphics>
  </node>
  <node id="40609" label="ENSMUSG00000027954" cy:nodeId="429">
    <graphics z="0.0" y="574.048828125" x="84.56600189208984">
      <att name="lockedVisualProperties" type="list" cy:type="List">
        <att name="NODE_LABEL" value="" type="string" cy:type="String"/>
      </att>
    </graphics>
  </node>
  <node id="40610" label="ENSMUSG00000024990" cy:nodeId="1454">
    <graphics z="0.0" y="369.9920349121094" x="-15.545551300048828">
      <att name="lockedVisualProperties" type="list" cy:type="List">
        <att name="NODE_LABEL" value="" type="string" cy:type="String"/>
      </att>
    </graphics>
  </node>
  <node id="40611" label="ENSMUSG00000027995" cy:nodeId="430">
    <graphics z="0.0" y="124.72715759277344" x="25.04467010498047">
      <att name="lockedVisualProperties" type="list" cy:type="List">
        <att name="NODE_LABEL" value="" type="string" cy:type="String"/>
      </att>
    </graphics>
  </node>
  <node id="40612" label="ENSMUSG00000028186" cy:nodeId="431">
    <graphics z="0.0" y="228.772216796875" x="430.6844482421875">
      <att name="lockedVisualProperties" type="list" cy:type="List">
        <att name="NODE_LABEL" value="" type="string" cy:type="String"/>
      </att>
    </graphics>
  </node>
  <node id="40613" label="ENSMUSG00000028211" cy:nodeId="432">
    <graphics z="0.0" y="596.7520141601562" x="171.95999145507812">
      <att name="lockedVisualProperties" type="list" cy:type="List">
        <att name="NODE_LABEL" value="" type="string" cy:type="String"/>
      </att>
    </graphics>
  </node>
  <node id="40614" label="ENSMUSG00000025075" cy:nodeId="1457">
    <graphics z="0.0" y="286.1626281738281" x="195.03018188476562">
      <att name="lockedVisualProperties" type="list" cy:type="List">
        <att name="NODE_LABEL" value="" type="string" cy:type="String"/>
      </att>
    </graphics>
  </node>
  <node id="40615" label="ENSMUSG00000028341" cy:nodeId="436">
    <graphics z="0.0" y="193.26416015625" x="115.60081481933594">
      <att name="lockedVisualProperties" type="list" cy:type="List">
        <att name="NODE_LABEL" value="" type="string" cy:type="String"/>
      </att>
    </graphics>
  </node>
  <node id="40616" label="ENSMUSG00000028517" cy:nodeId="441">
    <graphics z="0.0" y="118.18701171875" x="448.26593017578125">
      <att name="lockedVisualProperties" type="list" cy:type="List">
        <att name="NODE_LABEL" value="" type="string" cy:type="String"/>
      </att>
    </graphics>
  </node>
  <node id="40617" label="ENSMUSG00000025154" cy:nodeId="1465">
    <graphics z="0.0" y="200.65399169921875" x="552.6403198242188">
      <att name="lockedVisualProperties" type="list" cy:type="List">
        <att name="NODE_LABEL" value="" type="string" cy:type="String"/>
      </att>
    </graphics>
  </node>
  <node id="40618" label="ENSMUSG00000028542" cy:nodeId="442">
    <graphics z="0.0" y="499.41046142578125" x="375.9937438964844">
      <att name="lockedVisualProperties" type="list" cy:type="List">
        <att name="NODE_LABEL" value="" type="string" cy:type="String"/>
      </att>
    </graphics>
  </node>
  <node id="40619" label="ENSMUSG00000025161" cy:nodeId="1466">
    <graphics z="0.0" y="14.497161865234375" x="304.5391845703125">
      <att name="lockedVisualProperties" type="list" cy:type="List">
        <att name="NODE_LABEL" value="" type="string" cy:type="String"/>
      </att>
    </graphics>
  </node>
  <node id="40620" label="ENSMUSG00000028576" cy:nodeId="444">
    <graphics z="0.0" y="484.0977783203125" x="523.0802612304688">
      <att name="lockedVisualProperties" type="list" cy:type="List">
        <att name="NODE_LABEL" value="" type="string" cy:type="String"/>
      </att>
    </graphics>
  </node>
  <node id="40621" label="ENSMUSG00000028602" cy:nodeId="445">
    <graphics z="0.0" y="280.10595703125" x="560.5938110351562">
      <att name="lockedVisualProperties" type="list" cy:type="List">
        <att name="NODE_LABEL" value="" type="string" cy:type="String"/>
      </att>
    </graphics>
  </node>
  <node id="40622" label="ENSMUSG00000028634" cy:nodeId="446">
    <graphics z="0.0" y="225.36886596679688" x="-53.673606872558594">
      <att name="lockedVisualProperties" type="list" cy:type="List">
        <att name="NODE_LABEL" value="" type="string" cy:type="String"/>
      </att>
    </graphics>
  </node>
  <node id="40623" label="ENSMUSG00000025203" cy:nodeId="1471">
    <graphics z="0.0" y="278.951904296875" x="331.7516784667969">
      <att name="lockedVisualProperties" type="list" cy:type="List">
        <att name="NODE_LABEL" value="" type="string" cy:type="String"/>
      </att>
    </graphics>
  </node>
  <node id="40624" label="ENSMUSG00000025279" cy:nodeId="1474">
    <graphics z="0.0" y="537.2747802734375" x="487.21044921875">
      <att name="lockedVisualProperties" type="list" cy:type="List">
        <att name="NODE_LABEL" value="" type="string" cy:type="String"/>
      </att>
    </graphics>
  </node>
  <node id="40625" label="ENSMUSG00000025348" cy:nodeId="1475">
    <graphics z="0.0" y="98.61322784423828" x="460.6602478027344">
      <att name="lockedVisualProperties" type="list" cy:type="List">
        <att name="NODE_LABEL" value="" type="string" cy:type="String"/>
      </att>
    </graphics>
  </node>
  <node id="40626" label="ENSMUSG00000028943" cy:nodeId="456">
    <graphics z="0.0" y="522.270751953125" x="107.76791381835938">
      <att name="lockedVisualProperties" type="list" cy:type="List">
        <att name="NODE_LABEL" value="" type="string" cy:type="String"/>
      </att>
    </graphics>
  </node>
  <node id="40627" label="ENSMUSG00000029161" cy:nodeId="462">
    <graphics z="0.0" y="663.0081176757812" x="396.57269287109375">
      <att name="lockedVisualProperties" type="list" cy:type="List">
        <att name="NODE_LABEL" value="" type="string" cy:type="String"/>
      </att>
    </graphics>
  </node>
  <node id="40628" label="ENSMUSG00000029177" cy:nodeId="464">
    <graphics z="0.0" y="454.13702392578125" x="392.5407409667969">
      <att name="lockedVisualProperties" type="list" cy:type="List">
        <att name="NODE_LABEL" value="" type="string" cy:type="String"/>
      </att>
    </graphics>
  </node>
  <node id="40629" label="ENSMUSG00000029330" cy:nodeId="465">
    <graphics z="0.0" y="169.38026428222656" x="215.63360595703125">
      <att name="lockedVisualProperties" type="list" cy:type="List">
        <att name="NODE_LABEL" value="" type="string" cy:type="String"/>
      </att>
    </graphics>
  </node>
  <node id="40630" label="ENSMUSG00000025608" cy:nodeId="1489">
    <graphics z="0.0" y="91.00638580322266" x="146.31561279296875">
      <att name="lockedVisualProperties" type="list" cy:type="List">
        <att name="NODE_LABEL" value="" type="string" cy:type="String"/>
      </att>
    </graphics>
  </node>
  <node id="40631" label="ENSMUSG00000029484" cy:nodeId="466">
    <graphics z="0.0" y="219.51290893554688" x="183.4512939453125">
      <att name="lockedVisualProperties" type="list" cy:type="List">
        <att name="NODE_LABEL" value="" type="string" cy:type="String"/>
      </att>
    </graphics>
  </node>
  <node id="40632" label="ENSMUSG00000029560" cy:nodeId="468">
    <graphics z="0.0" y="303.99468994140625" x="334.96209716796875">
      <att name="lockedVisualProperties" type="list" cy:type="List">
        <att name="NODE_LABEL" value="" type="string" cy:type="String"/>
      </att>
    </graphics>
  </node>
  <node id="40633" label="ENSMUSG00000025758" cy:nodeId="1494">
    <graphics z="0.0" y="341.0013122558594" x="423.044677734375">
      <att name="lockedVisualProperties" type="list" cy:type="List">
        <att name="NODE_LABEL" value="" type="string" cy:type="String"/>
      </att>
    </graphics>
  </node>
  <node id="40634" label="ENSMUSG00000029674" cy:nodeId="471">
    <graphics z="0.0" y="310.75054931640625" x="118.14201354980469">
      <att name="lockedVisualProperties" type="list" cy:type="List">
        <att name="NODE_LABEL" value="" type="string" cy:type="String"/>
      </att>
    </graphics>
  </node>
  <node id="40635" label="ENSMUSG00000025790" cy:nodeId="1496">
    <graphics z="0.0" y="268.5663146972656" x="185.3663330078125">
      <att name="lockedVisualProperties" type="list" cy:type="List">
        <att name="NODE_LABEL" value="" type="string" cy:type="String"/>
      </att>
    </graphics>
  </node>
  <node id="40636" label="ENSMUSG00000029769" cy:nodeId="473">
    <graphics z="0.0" y="468.9442138671875" x="211.43463134765625">
      <att name="lockedVisualProperties" type="list" cy:type="List">
        <att name="NODE_LABEL" value="" type="string" cy:type="String"/>
      </att>
    </graphics>
  </node>
  <node id="40637" label="ENSMUSG00000029772" cy:nodeId="474">
    <graphics z="0.0" y="222.32908630371094" x="114.22064208984375">
      <att name="lockedVisualProperties" type="list" cy:type="List">
        <att name="NODE_LABEL" value="" type="string" cy:type="String"/>
      </att>
    </graphics>
  </node>
  <node id="40638" label="ENSMUSG00000029814" cy:nodeId="475">
    <graphics z="0.0" y="433.8572998046875" x="-81.68109130859375">
      <att name="lockedVisualProperties" type="list" cy:type="List">
        <att name="NODE_LABEL" value="" type="string" cy:type="String"/>
      </att>
    </graphics>
  </node>
  <node id="40639" label="ENSMUSG00000029847" cy:nodeId="476">
    <graphics z="0.0" y="484.4372863769531" x="42.4351806640625">
      <att name="lockedVisualProperties" type="list" cy:type="List">
        <att name="NODE_LABEL" value="" type="string" cy:type="String"/>
      </att>
    </graphics>
  </node>
  <node id="40640" label="ENSMUSG00000030074" cy:nodeId="479">
    <graphics z="0.0" y="538.8757934570312" x="452.853759765625">
      <att name="lockedVisualProperties" type="list" cy:type="List">
        <att name="NODE_LABEL" value="" type="string" cy:type="String"/>
      </att>
    </graphics>
  </node>
  <node id="40641" label="ENSMUSG00000026077" cy:nodeId="1505">
    <graphics z="0.0" y="333.7159118652344" x="508.50469970703125">
      <att name="lockedVisualProperties" type="list" cy:type="List">
        <att name="NODE_LABEL" value="" type="string" cy:type="String"/>
      </att>
    </graphics>
  </node>
  <node id="40642" label="ENSMUSG00000030329" cy:nodeId="484">
    <graphics z="0.0" y="142.539306640625" x="89.30091094970703">
      <att name="lockedVisualProperties" type="list" cy:type="List">
        <att name="NODE_LABEL" value="" type="string" cy:type="String"/>
      </att>
    </graphics>
  </node>
  <node id="40643" label="ENSMUSG00000026170" cy:nodeId="1508">
    <graphics z="0.0" y="643.2559204101562" x="268.1593017578125">
      <att name="lockedVisualProperties" type="list" cy:type="List">
        <att name="NODE_LABEL" value="" type="string" cy:type="String"/>
      </att>
    </graphics>
  </node>
  <node id="40644" label="ENSMUSG00000026223" cy:nodeId="1512">
    <graphics z="0.0" y="444.6146240234375" x="-23.346179962158203">
      <att name="lockedVisualProperties" type="list" cy:type="List">
        <att name="NODE_LABEL" value="" type="string" cy:type="String"/>
      </att>
    </graphics>
  </node>
  <node id="40645" label="ENSMUSG00000026227" cy:nodeId="1513">
    <graphics z="0.0" y="212.22657775878906" x="463.46185302734375">
      <att name="lockedVisualProperties" type="list" cy:type="List">
        <att name="NODE_LABEL" value="" type="string" cy:type="String"/>
      </att>
    </graphics>
  </node>
  <node id="40646" label="ENSMUSG00000030769" cy:nodeId="491">
    <graphics z="0.0" y="501.19024658203125" x="310.13128662109375">
      <att name="lockedVisualProperties" type="list" cy:type="List">
        <att name="NODE_LABEL" value="" type="string" cy:type="String"/>
      </att>
    </graphics>
  </node>
  <node id="40647" label="ENSMUSG00000030772" cy:nodeId="492">
    <graphics z="0.0" y="163.58969116210938" x="269.9934997558594">
      <att name="lockedVisualProperties" type="list" cy:type="List">
        <att name="NODE_LABEL" value="" type="string" cy:type="String"/>
      </att>
    </graphics>
  </node>
  <node id="40648" label="ENSMUSG00000026405" cy:nodeId="1522">
    <graphics z="0.0" y="482.3243408203125" x="-61.04615020751953">
      <att name="lockedVisualProperties" type="list" cy:type="List">
        <att name="NODE_LABEL" value="" type="string" cy:type="String"/>
      </att>
    </graphics>
  </node>
  <node id="40649" label="ENSMUSG00000026415" cy:nodeId="1523">
    <graphics z="0.0" y="140.3555450439453" x="490.15313720703125">
      <att name="lockedVisualProperties" type="list" cy:type="List">
        <att name="NODE_LABEL" value="" type="string" cy:type="String"/>
      </att>
    </graphics>
  </node>
  <node id="40650" label="ENSMUSG00000026447" cy:nodeId="1525">
    <graphics z="0.0" y="163.7671356201172" x="301.154541015625">
      <att name="lockedVisualProperties" type="list" cy:type="List">
        <att name="NODE_LABEL" value="" type="string" cy:type="String"/>
      </att>
    </graphics>
  </node>
  <node id="40651" label="ENSMUSG00000031453" cy:nodeId="506">
    <graphics z="0.0" y="73.26493072509766" x="366.6462707519531">
      <att name="lockedVisualProperties" type="list" cy:type="List">
        <att name="NODE_LABEL" value="" type="string" cy:type="String"/>
      </att>
    </graphics>
  </node>
  <node id="40652" label="ENSMUSG00000031538" cy:nodeId="507">
    <graphics z="0.0" y="72.71437072753906" x="282.1686096191406">
      <att name="lockedVisualProperties" type="list" cy:type="List">
        <att name="NODE_LABEL" value="" type="string" cy:type="String"/>
      </att>
    </graphics>
  </node>
  <node id="40653" label="ENSMUSG00000026546" cy:nodeId="1531">
    <graphics z="0.0" y="56.54505920410156" x="285.89215087890625">
      <att name="lockedVisualProperties" type="list" cy:type="List">
        <att name="NODE_LABEL" value="" type="string" cy:type="String"/>
      </att>
    </graphics>
  </node>
  <node id="40654" label="ENSMUSG00000026773" cy:nodeId="1538">
    <graphics z="0.0" y="459.9086608886719" x="461.3668212890625">
      <att name="lockedVisualProperties" type="list" cy:type="List">
        <att name="NODE_LABEL" value="" type="string" cy:type="String"/>
      </att>
    </graphics>
  </node>
  <node id="40655" label="ENSMUSG00000031668" cy:nodeId="515">
    <graphics z="0.0" y="275.643798828125" x="30.21002960205078">
      <att name="lockedVisualProperties" type="list" cy:type="List">
        <att name="NODE_LABEL" value="" type="string" cy:type="String"/>
      </att>
    </graphics>
  </node>
  <node id="40656" label="ENSMUSG00000026820" cy:nodeId="1541">
    <graphics z="0.0" y="586.58837890625" x="274.129638671875">
      <att name="lockedVisualProperties" type="list" cy:type="List">
        <att name="NODE_LABEL" value="" type="string" cy:type="String"/>
      </att>
    </graphics>
  </node>
  <node id="40657" label="ENSMUSG00000031827" cy:nodeId="518">
    <graphics z="0.0" y="441.29046630859375" x="414.78240966796875">
      <att name="lockedVisualProperties" type="list" cy:type="List">
        <att name="NODE_LABEL" value="" type="string" cy:type="String"/>
      </att>
    </graphics>
  </node>
  <node id="40658" label="ENSMUSG00000031845" cy:nodeId="519">
    <graphics z="0.0" y="503.3297119140625" x="248.28359985351562">
      <att name="lockedVisualProperties" type="list" cy:type="List">
        <att name="NODE_LABEL" value="" type="string" cy:type="String"/>
      </att>
    </graphics>
  </node>
  <node id="40659" label="ENSMUSG00000031903" cy:nodeId="520">
    <graphics z="0.0" y="180.0179901123047" x="432.122314453125">
      <att name="lockedVisualProperties" type="list" cy:type="List">
        <att name="NODE_LABEL" value="" type="string" cy:type="String"/>
      </att>
    </graphics>
  </node>
  <node id="40660" label="ENSMUSG00000031925" cy:nodeId="521">
    <graphics z="0.0" y="132.8305206298828" x="114.67195129394531">
      <att name="lockedVisualProperties" type="list" cy:type="List">
        <att name="NODE_LABEL" value="" type="string" cy:type="String"/>
      </att>
    </graphics>
  </node>
  <node id="40661" label="ENSMUSG00000031980" cy:nodeId="523">
    <graphics z="0.0" y="345.6573486328125" x="535.8444213867188">
      <att name="lockedVisualProperties" type="list" cy:type="List">
        <att name="NODE_LABEL" value="" type="string" cy:type="String"/>
      </att>
    </graphics>
  </node>
  <node id="40662" label="ENSMUSG00000026980" cy:nodeId="1548">
    <graphics z="0.0" y="535.2348022460938" x="168.40370178222656">
      <att name="lockedVisualProperties" type="list" cy:type="List">
        <att name="NODE_LABEL" value="" type="string" cy:type="String"/>
      </att>
    </graphics>
  </node>
  <node id="40663" label="ENSMUSG00000027068" cy:nodeId="1549">
    <graphics z="0.0" y="-0.5137653350830078" x="304.3675842285156">
      <att name="lockedVisualProperties" type="list" cy:type="List">
        <att name="NODE_LABEL" value="" type="string" cy:type="String"/>
      </att>
    </graphics>
  </node>
  <node id="40664" label="ENSMUSG00000032018" cy:nodeId="525">
    <graphics z="0.0" y="418.8810729980469" x="113.96476745605469">
      <att name="lockedVisualProperties" type="list" cy:type="List">
        <att name="NODE_LABEL" value="" type="string" cy:type="String"/>
      </att>
    </graphics>
  </node>
  <node id="40665" label="ENSMUSG00000027173" cy:nodeId="1552">
    <graphics z="0.0" y="171.34913635253906" x="410.83465576171875">
      <att name="lockedVisualProperties" type="list" cy:type="List">
        <att name="NODE_LABEL" value="" type="string" cy:type="String"/>
      </att>
    </graphics>
  </node>
  <node id="40666" label="ENSMUSG00000032245" cy:nodeId="528">
    <graphics z="0.0" y="407.4498291015625" x="467.02191162109375">
      <att name="lockedVisualProperties" type="list" cy:type="List">
        <att name="NODE_LABEL" value="" type="string" cy:type="String"/>
      </att>
    </graphics>
  </node>
  <node id="40667" label="ENSMUSG00000032294" cy:nodeId="529">
    <graphics z="0.0" y="316.5013427734375" x="66.69104766845703">
      <att name="lockedVisualProperties" type="list" cy:type="List">
        <att name="NODE_LABEL" value="" type="string" cy:type="String"/>
      </att>
    </graphics>
  </node>
  <node id="40668" label="ENSMUSG00000032314" cy:nodeId="530">
    <graphics z="0.0" y="518.7227172851562" x="387.8790588378906">
      <att name="lockedVisualProperties" type="list" cy:type="List">
        <att name="NODE_LABEL" value="" type="string" cy:type="String"/>
      </att>
    </graphics>
  </node>
  <node id="40669" label="ENSMUSG00000027316" cy:nodeId="1559">
    <graphics z="0.0" y="399.7857971191406" x="8.589683532714844">
      <att name="lockedVisualProperties" type="list" cy:type="List">
        <att name="NODE_LABEL" value="" type="string" cy:type="String"/>
      </att>
    </graphics>
  </node>
  <node id="40670" label="ENSMUSG00000032411" cy:nodeId="535">
    <graphics z="0.0" y="597.6178588867188" x="441.4398193359375">
      <att name="lockedVisualProperties" type="list" cy:type="List">
        <att name="NODE_LABEL" value="" type="string" cy:type="String"/>
      </att>
    </graphics>
  </node>
  <node id="40671" label="ENSMUSG00000032656" cy:nodeId="541">
    <graphics z="0.0" y="333.5430603027344" x="165.6319580078125">
      <att name="lockedVisualProperties" type="list" cy:type="List">
        <att name="NODE_LABEL" value="" type="string" cy:type="String"/>
      </att>
    </graphics>
  </node>
  <node id="40672" label="ENSMUSG00000032733" cy:nodeId="543">
    <graphics z="0.0" y="85.85887908935547" x="510.62261962890625">
      <att name="lockedVisualProperties" type="list" cy:type="List">
        <att name="NODE_LABEL" value="" type="string" cy:type="String"/>
      </att>
    </graphics>
  </node>
  <node id="40673" label="ENSMUSG00000027435" cy:nodeId="1567">
    <graphics z="0.0" y="407.552001953125" x="463.0684814453125">
      <att name="lockedVisualProperties" type="list" cy:type="List">
        <att name="NODE_LABEL" value="" type="string" cy:type="String"/>
      </att>
    </graphics>
  </node>
  <node id="40674" label="ENSMUSG00000032740" cy:nodeId="544">
    <graphics z="0.0" y="450.23150634765625" x="510.797119140625">
      <att name="lockedVisualProperties" type="list" cy:type="List">
        <att name="NODE_LABEL" value="" type="string" cy:type="String"/>
      </att>
    </graphics>
  </node>
  <node id="40675" label="ENSMUSG00000032754" cy:nodeId="545">
    <graphics z="0.0" y="93.87885284423828" x="317.47857666015625">
      <att name="lockedVisualProperties" type="list" cy:type="List">
        <att name="NODE_LABEL" value="" type="string" cy:type="String"/>
      </att>
    </graphics>
  </node>
  <node id="40676" label="ENSMUSG00000032783" cy:nodeId="546">
    <graphics z="0.0" y="251.6123046875" x="-82.07318115234375">
      <att name="lockedVisualProperties" type="list" cy:type="List">
        <att name="NODE_LABEL" value="" type="string" cy:type="String"/>
      </att>
    </graphics>
  </node>
  <node id="40677" label="ENSMUSG00000032849" cy:nodeId="547">
    <graphics z="0.0" y="216.39126586914062" x="222.1517333984375">
      <att name="lockedVisualProperties" type="list" cy:type="List">
        <att name="NODE_LABEL" value="" type="string" cy:type="String"/>
      </att>
    </graphics>
  </node>
  <node id="40678" label="ENSMUSG00000032978" cy:nodeId="552">
    <graphics z="0.0" y="269.32781982421875" x="375.8315734863281">
      <att name="lockedVisualProperties" type="list" cy:type="List">
        <att name="NODE_LABEL" value="" type="string" cy:type="String"/>
      </att>
    </graphics>
  </node>
  <node id="40679" label="ENSMUSG00000027692" cy:nodeId="1577">
    <graphics z="0.0" y="191.03692626953125" x="22.47460174560547">
      <att name="lockedVisualProperties" type="list" cy:type="List">
        <att name="NODE_LABEL" value="" type="string" cy:type="String"/>
      </att>
    </graphics>
  </node>
  <node id="40680" label="ENSMUSG00000033105" cy:nodeId="554">
    <graphics z="0.0" y="257.1624450683594" x="-88.47897338867188">
      <att name="lockedVisualProperties" type="list" cy:type="List">
        <att name="NODE_LABEL" value="" type="string" cy:type="String"/>
      </att>
    </graphics>
  </node>
  <node id="40681" label="ENSMUSG00000027737" cy:nodeId="1578">
    <graphics z="0.0" y="67.65650939941406" x="31.081863403320312">
      <att name="lockedVisualProperties" type="list" cy:type="List">
        <att name="NODE_LABEL" value="" type="string" cy:type="String"/>
      </att>
    </graphics>
  </node>
  <node id="40682" label="ENSMUSG00000033161" cy:nodeId="556">
    <graphics z="0.0" y="637.5617065429688" x="275.70391845703125">
      <att name="lockedVisualProperties" type="list" cy:type="List">
        <att name="NODE_LABEL" value="" type="string" cy:type="String"/>
      </att>
    </graphics>
  </node>
  <node id="40683" label="ENSMUSG00000033209" cy:nodeId="557">
    <graphics z="0.0" y="627.9169311523438" x="216.2647705078125">
      <att name="lockedVisualProperties" type="list" cy:type="List">
        <att name="NODE_LABEL" value="" type="string" cy:type="String"/>
      </att>
    </graphics>
  </node>
  <node id="40684" label="ENSMUSG00000033256" cy:nodeId="558">
    <graphics z="0.0" y="299.27655029296875" x="378.15191650390625">
      <att name="lockedVisualProperties" type="list" cy:type="List">
        <att name="NODE_LABEL" value="" type="string" cy:type="String"/>
      </att>
    </graphics>
  </node>
  <node id="40685" label="ENSMUSG00000027799" cy:nodeId="1582">
    <graphics z="0.0" y="126.70016479492188" x="357.3064270019531">
      <att name="lockedVisualProperties" type="list" cy:type="List">
        <att name="NODE_LABEL" value="" type="string" cy:type="String"/>
      </att>
    </graphics>
  </node>
  <node id="40686" label="ENSMUSG00000033287" cy:nodeId="559">
    <graphics z="0.0" y="522.123046875" x="509.55712890625">
      <att name="lockedVisualProperties" type="list" cy:type="List">
        <att name="NODE_LABEL" value="" type="string" cy:type="String"/>
      </att>
    </graphics>
  </node>
  <node id="40687" label="ENSMUSG00000033318" cy:nodeId="560">
    <graphics z="0.0" y="349.2148742675781" x="25.59809112548828">
      <att name="lockedVisualProperties" type="list" cy:type="List">
        <att name="NODE_LABEL" value="" type="string" cy:type="String"/>
      </att>
    </graphics>
  </node>
  <node id="40688" label="ENSMUSG00000033530" cy:nodeId="563">
    <graphics z="0.0" y="395.24114990234375" x="569.5162963867188">
      <att name="lockedVisualProperties" type="list" cy:type="List">
        <att name="NODE_LABEL" value="" type="string" cy:type="String"/>
      </att>
    </graphics>
  </node>
  <node id="40689" label="ENSMUSG00000033685" cy:nodeId="564">
    <graphics z="0.0" y="230.020263671875" x="248.61398315429688">
      <att name="lockedVisualProperties" type="list" cy:type="List">
        <att name="NODE_LABEL" value="" type="string" cy:type="String"/>
      </att>
    </graphics>
  </node>
  <node id="40690" label="ENSMUSG00000033871" cy:nodeId="568">
    <graphics z="0.0" y="352.9944152832031" x="572.4928588867188">
      <att name="lockedVisualProperties" type="list" cy:type="List">
        <att name="NODE_LABEL" value="" type="string" cy:type="String"/>
      </att>
    </graphics>
  </node>
  <node id="40691" label="ENSMUSG00000028076" cy:nodeId="1595">
    <graphics z="0.0" y="568.0650024414062" x="9.614276885986328">
      <att name="lockedVisualProperties" type="list" cy:type="List">
        <att name="NODE_LABEL" value="" type="string" cy:type="String"/>
      </att>
    </graphics>
  </node>
  <node id="40692" label="ENSMUSG00000034116" cy:nodeId="572">
    <graphics z="0.0" y="83.43755340576172" x="321.5098571777344">
      <att name="lockedVisualProperties" type="list" cy:type="List">
        <att name="NODE_LABEL" value="" type="string" cy:type="String"/>
      </att>
    </graphics>
  </node>
  <node id="40693" label="ENSMUSG00000034265" cy:nodeId="574">
    <graphics z="0.0" y="309.074462890625" x="207.548095703125">
      <att name="lockedVisualProperties" type="list" cy:type="List">
        <att name="NODE_LABEL" value="" type="string" cy:type="String"/>
      </att>
    </graphics>
  </node>
  <node id="40694" label="ENSMUSG00000034413" cy:nodeId="576">
    <graphics z="0.0" y="224.63909912109375" x="365.681884765625">
      <att name="lockedVisualProperties" type="list" cy:type="List">
        <att name="NODE_LABEL" value="" type="string" cy:type="String"/>
      </att>
    </graphics>
  </node>
  <node id="40695" label="ENSMUSG00000034684" cy:nodeId="581">
    <graphics z="0.0" y="396.0327453613281" x="13.926719665527344">
      <att name="lockedVisualProperties" type="list" cy:type="List">
        <att name="NODE_LABEL" value="" type="string" cy:type="String"/>
      </att>
    </graphics>
  </node>
  <node id="40696" label="ENSMUSG00000034773" cy:nodeId="582">
    <graphics z="0.0" y="127.1796875" x="370.0560302734375">
      <att name="lockedVisualProperties" type="list" cy:type="List">
        <att name="NODE_LABEL" value="" type="string" cy:type="String"/>
      </att>
    </graphics>
  </node>
  <node id="40697" label="ENSMUSG00000028327" cy:nodeId="1609">
    <graphics z="0.0" y="275.228271484375" x="-81.20069885253906">
      <att name="lockedVisualProperties" type="list" cy:type="List">
        <att name="NODE_LABEL" value="" type="string" cy:type="String"/>
      </att>
    </graphics>
  </node>
  <node id="40698" label="ENSMUSG00000035105" cy:nodeId="586">
    <graphics z="0.0" y="130.1581268310547" x="25.570037841796875">
      <att name="lockedVisualProperties" type="list" cy:type="List">
        <att name="NODE_LABEL" value="" type="string" cy:type="String"/>
      </att>
    </graphics>
  </node>
  <node id="40699" label="ENSMUSG00000035279" cy:nodeId="591">
    <graphics z="0.0" y="556.6061781781355" x="653.415430975745">
      <att name="lockedVisualProperties" type="list" cy:type="List">
        <att name="NODE_LABEL" value="" type="string" cy:type="String"/>
      </att>
    </graphics>
  </node>
  <node id="40700" label="ENSMUSG00000028555" cy:nodeId="1616">
    <graphics z="0.0" y="50.57179260253906" x="247.21646118164062">
      <att name="lockedVisualProperties" type="list" cy:type="List">
        <att name="NODE_LABEL" value="" type="string" cy:type="String"/>
      </att>
    </graphics>
  </node>
  <node id="40701" label="ENSMUSG00000035357" cy:nodeId="592">
    <graphics z="0.0" y="179.689697265625" x="141.26406860351562">
      <att name="lockedVisualProperties" type="list" cy:type="List">
        <att name="NODE_LABEL" value="" type="string" cy:type="String"/>
      </att>
    </graphics>
  </node>
  <node id="40702" label="ENSMUSG00000035441" cy:nodeId="594">
    <graphics z="0.0" y="126.56512451171875" x="345.95916748046875">
      <att name="lockedVisualProperties" type="list" cy:type="List">
        <att name="NODE_LABEL" value="" type="string" cy:type="String"/>
      </att>
    </graphics>
  </node>
  <node id="40703" label="ENSMUSG00000028649" cy:nodeId="1620">
    <graphics z="0.0" y="457.38800048828125" x="330.15020751953125">
      <att name="lockedVisualProperties" type="list" cy:type="List">
        <att name="NODE_LABEL" value="" type="string" cy:type="String"/>
      </att>
    </graphics>
  </node>
  <node id="40704" label="ENSMUSG00000035683" cy:nodeId="598">
    <graphics z="0.0" y="79.13436889648438" x="379.1720886230469">
      <att name="lockedVisualProperties" type="list" cy:type="List">
        <att name="NODE_LABEL" value="" type="string" cy:type="String"/>
      </att>
    </graphics>
  </node>
  <node id="40705" label="ENSMUSG00000028874" cy:nodeId="1624">
    <graphics z="0.0" y="572.486572265625" x="16.632579803466797">
      <att name="lockedVisualProperties" type="list" cy:type="List">
        <att name="NODE_LABEL" value="" type="string" cy:type="String"/>
      </att>
    </graphics>
  </node>
  <node id="40706" label="ENSMUSG00000035901" cy:nodeId="602">
    <graphics z="0.0" y="592.6554565429688" x="404.0466003417969">
      <att name="lockedVisualProperties" type="list" cy:type="List">
        <att name="NODE_LABEL" value="" type="string" cy:type="String"/>
      </att>
    </graphics>
  </node>
  <node id="40707" label="ENSMUSG00000036863" cy:nodeId="609">
    <graphics z="0.0" y="270.251708984375" x="7.087825775146484">
      <att name="lockedVisualProperties" type="list" cy:type="List">
        <att name="NODE_LABEL" value="" type="string" cy:type="String"/>
      </att>
    </graphics>
  </node>
  <node id="40708" label="ENSMUSG00000029173" cy:nodeId="1634">
    <graphics z="0.0" y="468.338623046875" x="514.1917114257812">
      <att name="lockedVisualProperties" type="list" cy:type="List">
        <att name="NODE_LABEL" value="" type="string" cy:type="String"/>
      </att>
    </graphics>
  </node>
  <node id="40709" label="ENSMUSG00000036887" cy:nodeId="611">
    <graphics z="0.0" y="357.183837890625" x="416.8935546875">
      <att name="lockedVisualProperties" type="list" cy:type="List">
        <att name="NODE_LABEL" value="" type="string" cy:type="String"/>
      </att>
    </graphics>
  </node>
  <node id="40710" label="ENSMUSG00000037071" cy:nodeId="616">
    <graphics z="0.0" y="320.59661865234375" x="-25.659320831298828">
      <att name="lockedVisualProperties" type="list" cy:type="List">
        <att name="NODE_LABEL" value="" type="string" cy:type="String"/>
      </att>
    </graphics>
  </node>
  <node id="40711" label="ENSMUSG00000037169" cy:nodeId="617">
    <graphics z="0.0" y="367.173828125" x="206.67654418945312">
      <att name="lockedVisualProperties" type="list" cy:type="List">
        <att name="NODE_LABEL" value="" type="string" cy:type="String"/>
      </att>
    </graphics>
  </node>
  <node id="40712" label="ENSMUSG00000029343" cy:nodeId="1642">
    <graphics z="0.0" y="643.890625" x="276.72216796875">
      <att name="lockedVisualProperties" type="list" cy:type="List">
        <att name="NODE_LABEL" value="" type="string" cy:type="String"/>
      </att>
    </graphics>
  </node>
  <node id="40713" label="ENSMUSG00000037235" cy:nodeId="619">
    <graphics z="0.0" y="212.44131469726562" x="385.0769348144531">
      <att name="lockedVisualProperties" type="list" cy:type="List">
        <att name="NODE_LABEL" value="" type="string" cy:type="String"/>
      </att>
    </graphics>
  </node>
  <node id="40714" label="ENSMUSG00000037379" cy:nodeId="620">
    <graphics z="0.0" y="78.99879455566406" x="446.97784423828125">
      <att name="lockedVisualProperties" type="list" cy:type="List">
        <att name="NODE_LABEL" value="" type="string" cy:type="String"/>
      </att>
    </graphics>
  </node>
  <node id="40715" label="ENSMUSG00000029370" cy:nodeId="1644">
    <graphics z="0.0" y="306.32342529296875" x="413.84814453125">
      <att name="lockedVisualProperties" type="list" cy:type="List">
        <att name="NODE_LABEL" value="" type="string" cy:type="String"/>
      </att>
    </graphics>
  </node>
  <node id="40716" label="ENSMUSG00000037386" cy:nodeId="621">
    <graphics z="0.0" y="303.4998779296875" x="487.0556640625">
      <att name="lockedVisualProperties" type="list" cy:type="List">
        <att name="NODE_LABEL" value="" type="string" cy:type="String"/>
      </att>
    </graphics>
  </node>
  <node id="40717" label="ENSMUSG00000029413" cy:nodeId="1647">
    <graphics z="0.0" y="369.49346923828125" x="123.29989624023438">
      <att name="lockedVisualProperties" type="list" cy:type="List">
        <att name="NODE_LABEL" value="" type="string" cy:type="String"/>
      </att>
    </graphics>
  </node>
  <node id="40718" label="ENSMUSG00000037447" cy:nodeId="625">
    <graphics z="0.0" y="318.8941650390625" x="291.4137268066406">
      <att name="lockedVisualProperties" type="list" cy:type="List">
        <att name="NODE_LABEL" value="" type="string" cy:type="String"/>
      </att>
    </graphics>
  </node>
  <node id="40719" label="ENSMUSG00000029470" cy:nodeId="1651">
    <graphics z="0.0" y="626.376708984375" x="230.4510498046875">
      <att name="lockedVisualProperties" type="list" cy:type="List">
        <att name="NODE_LABEL" value="" type="string" cy:type="String"/>
      </att>
    </graphics>
  </node>
  <node id="40720" label="ENSMUSG00000037579" cy:nodeId="627">
    <graphics z="0.0" y="403.5210266113281" x="26.615699768066406">
      <att name="lockedVisualProperties" type="list" cy:type="List">
        <att name="NODE_LABEL" value="" type="string" cy:type="String"/>
      </att>
    </graphics>
  </node>
  <node id="40721" label="ENSMUSG00000029522" cy:nodeId="1653">
    <graphics z="0.0" y="277.21213203916705" x="606.2824222332198">
      <att name="lockedVisualProperties" type="list" cy:type="List">
        <att name="NODE_LABEL" value="" type="string" cy:type="String"/>
      </att>
    </graphics>
  </node>
  <node id="40722" label="ENSMUSG00000037606" cy:nodeId="629">
    <graphics z="0.0" y="509.18975830078125" x="423.47149658203125">
      <att name="lockedVisualProperties" type="list" cy:type="List">
        <att name="NODE_LABEL" value="" type="string" cy:type="String"/>
      </att>
    </graphics>
  </node>
  <node id="40723" label="ENSMUSG00000037621" cy:nodeId="630">
    <graphics z="0.0" y="141.8307647705078" x="520.6145629882812">
      <att name="lockedVisualProperties" type="list" cy:type="List">
        <att name="NODE_LABEL" value="" type="string" cy:type="String"/>
      </att>
    </graphics>
  </node>
  <node id="40724" label="ENSMUSG00000037624" cy:nodeId="631">
    <graphics z="0.0" y="613.201904296875" x="129.22586059570312">
      <att name="lockedVisualProperties" type="list" cy:type="List">
        <att name="NODE_LABEL" value="" type="string" cy:type="String"/>
      </att>
    </graphics>
  </node>
  <node id="40725" label="ENSMUSG00000037664" cy:nodeId="633">
    <graphics z="0.0" y="70.11135864257812" x="132.30751037597656">
      <att name="lockedVisualProperties" type="list" cy:type="List">
        <att name="NODE_LABEL" value="" type="string" cy:type="String"/>
      </att>
    </graphics>
  </node>
  <node id="40726" label="ENSMUSG00000104011" cy:nodeId="2685">
    <graphics z="0.0" y="449.68157958984375" x="487.00732421875">
      <att name="lockedVisualProperties" type="list" cy:type="List">
        <att name="NODE_LABEL" value="" type="string" cy:type="String"/>
      </att>
    </graphics>
  </node>
  <node id="40727" label="ENSMUSG00000037820" cy:nodeId="638">
    <graphics z="0.0" y="334.9402770996094" x="432.67340087890625">
      <att name="lockedVisualProperties" type="list" cy:type="List">
        <att name="NODE_LABEL" value="" type="string" cy:type="String"/>
      </att>
    </graphics>
  </node>
  <node id="40728" label="ENSMUSG00000085183" cy:nodeId="2689">
    <graphics z="0.0" y="390.2052917480469" x="159.57797241210938">
      <att name="lockedVisualProperties" type="list" cy:type="List">
        <att name="NODE_LABEL" value="" type="string" cy:type="String"/>
      </att>
    </graphics>
  </node>
  <node id="40729" label="ENSMUSG00000038175" cy:nodeId="644">
    <graphics z="0.0" y="586.510986328125" x="90.22708129882812">
      <att name="lockedVisualProperties" type="list" cy:type="List">
        <att name="NODE_LABEL" value="" type="string" cy:type="String"/>
      </att>
    </graphics>
  </node>
  <node id="40730" label="ENSMUSG00000097561" cy:nodeId="2693">
    <graphics z="0.0" y="406.74993896484375" x="256.3903503417969">
      <att name="lockedVisualProperties" type="list" cy:type="List">
        <att name="NODE_LABEL" value="" type="string" cy:type="String"/>
      </att>
    </graphics>
  </node>
  <node id="40731" label="ENSMUSG00000097908" cy:nodeId="2694">
    <graphics z="0.0" y="560.60546875" x="52.9290771484375">
      <att name="lockedVisualProperties" type="list" cy:type="List">
        <att name="NODE_LABEL" value="" type="string" cy:type="String"/>
      </att>
    </graphics>
  </node>
  <node id="40732" label="ENSMUSG00000097287" cy:nodeId="2695">
    <graphics z="0.0" y="532.5955200195312" x="550.9049682617188">
      <att name="lockedVisualProperties" type="list" cy:type="List">
        <att name="NODE_LABEL" value="" type="string" cy:type="String"/>
      </att>
    </graphics>
  </node>
  <node id="40733" label="ENSMUSG00000038349" cy:nodeId="648">
    <graphics z="0.0" y="434.26483154296875" x="444.7889709472656">
      <att name="lockedVisualProperties" type="list" cy:type="List">
        <att name="NODE_LABEL" value="" type="string" cy:type="String"/>
      </att>
    </graphics>
  </node>
  <node id="40734" label="ENSMUSG00000030048" cy:nodeId="1673">
    <graphics z="0.0" y="184.05142211914062" x="162.14205932617188">
      <att name="lockedVisualProperties" type="list" cy:type="List">
        <att name="NODE_LABEL" value="" type="string" cy:type="String"/>
      </att>
    </graphics>
  </node>
  <node id="40735" label="ENSMUSG00000097277" cy:nodeId="2697">
    <graphics z="0.0" y="550.12890625" x="426.38153076171875">
      <att name="lockedVisualProperties" type="list" cy:type="List">
        <att name="NODE_LABEL" value="" type="string" cy:type="String"/>
      </att>
    </graphics>
  </node>
  <node id="40736" label="ENSMUSG00000038379" cy:nodeId="650">
    <graphics z="0.0" y="282.2874450683594" x="-23.178871154785156">
      <att name="lockedVisualProperties" type="list" cy:type="List">
        <att name="NODE_LABEL" value="" type="string" cy:type="String"/>
      </att>
    </graphics>
  </node>
  <node id="40737" label="ENSMUSG00000038451" cy:nodeId="651">
    <graphics z="0.0" y="478.6103820800781" x="311.6464538574219">
      <att name="lockedVisualProperties" type="list" cy:type="List">
        <att name="NODE_LABEL" value="" type="string" cy:type="String"/>
      </att>
    </graphics>
  </node>
  <node id="40738" label="ENSMUSG00000030155" cy:nodeId="1676">
    <graphics z="0.0" y="324.86553955078125" x="168.10107421875">
      <att name="lockedVisualProperties" type="list" cy:type="List">
        <att name="NODE_LABEL" value="" type="string" cy:type="String"/>
      </att>
    </graphics>
  </node>
  <node id="40739" label="ENSMUSG00000038599" cy:nodeId="654">
    <graphics z="0.0" y="199.01104736328125" x="411.7904052734375">
      <att name="lockedVisualProperties" type="list" cy:type="List">
        <att name="NODE_LABEL" value="" type="string" cy:type="String"/>
      </att>
    </graphics>
  </node>
  <node id="40740" label="ENSMUSG00000030246" cy:nodeId="1679">
    <graphics z="0.0" y="314.04315185546875" x="193.0377960205078">
      <att name="lockedVisualProperties" type="list" cy:type="List">
        <att name="NODE_LABEL" value="" type="string" cy:type="String"/>
      </att>
    </graphics>
  </node>
  <node id="40741" label="ENSMUSG00000030287" cy:nodeId="1680">
    <graphics z="0.0" y="398.6260070800781" x="260.0967102050781">
      <att name="lockedVisualProperties" type="list" cy:type="List">
        <att name="NODE_LABEL" value="" type="string" cy:type="String"/>
      </att>
    </graphics>
  </node>
  <node id="40742" label="ENSMUSG00000038777" cy:nodeId="657">
    <graphics z="0.0" y="204.646484375" x="113.33778381347656">
      <att name="lockedVisualProperties" type="list" cy:type="List">
        <att name="NODE_LABEL" value="" type="string" cy:type="String"/>
      </att>
    </graphics>
  </node>
  <node id="40743" label="ENSMUSG00000097932" cy:nodeId="2705">
    <graphics z="0.0" y="525.4722290039062" x="384.4361572265625">
      <att name="lockedVisualProperties" type="list" cy:type="List">
        <att name="NODE_LABEL" value="" type="string" cy:type="String"/>
      </att>
    </graphics>
  </node>
  <node id="40744" label="ENSMUSG00000038884" cy:nodeId="659">
    <graphics z="0.0" y="552.7669677734375" x="306.8617248535156">
      <att name="lockedVisualProperties" type="list" cy:type="List">
        <att name="NODE_LABEL" value="" type="string" cy:type="String"/>
      </att>
    </graphics>
  </node>
  <node id="40745" label="ENSMUSG00000097039" cy:nodeId="2708">
    <graphics z="0.0" y="13.740341186523438" x="214.37255859375">
      <att name="lockedVisualProperties" type="list" cy:type="List">
        <att name="NODE_LABEL" value="" type="string" cy:type="String"/>
      </att>
    </graphics>
  </node>
  <node id="40746" label="ENSMUSG00000030528" cy:nodeId="1686">
    <graphics z="0.0" y="31.414817810058594" x="182.96075439453125">
      <att name="lockedVisualProperties" type="list" cy:type="List">
        <att name="NODE_LABEL" value="" type="string" cy:type="String"/>
      </att>
    </graphics>
  </node>
  <node id="40747" label="ENSMUSG00000030543" cy:nodeId="1687">
    <graphics z="0.0" y="469.476318359375" x="83.8382568359375">
      <att name="lockedVisualProperties" type="list" cy:type="List">
        <att name="NODE_LABEL" value="" type="string" cy:type="String"/>
      </att>
    </graphics>
  </node>
  <node id="40748" label="ENSMUSG00000039050" cy:nodeId="663">
    <graphics z="0.0" y="145.31231689453125" x="21.729019165039062">
      <att name="lockedVisualProperties" type="list" cy:type="List">
        <att name="NODE_LABEL" value="" type="string" cy:type="String"/>
      </att>
    </graphics>
  </node>
  <node id="40749" label="ENSMUSG00000039087" cy:nodeId="665">
    <graphics z="0.0" y="249.83847045898438" x="302.09259033203125">
      <att name="lockedVisualProperties" type="list" cy:type="List">
        <att name="NODE_LABEL" value="" type="string" cy:type="String"/>
      </att>
    </graphics>
  </node>
  <node id="40750" label="ENSMUSG00000039126" cy:nodeId="666">
    <graphics z="0.0" y="190.56861877441406" x="45.93670654296875">
      <att name="lockedVisualProperties" type="list" cy:type="List">
        <att name="NODE_LABEL" value="" type="string" cy:type="String"/>
      </att>
    </graphics>
  </node>
  <node id="40751" label="ENSMUSG00000030717" cy:nodeId="1690">
    <graphics z="0.0" y="402.4985046386719" x="443.46038818359375">
      <att name="lockedVisualProperties" type="list" cy:type="List">
        <att name="NODE_LABEL" value="" type="string" cy:type="String"/>
      </att>
    </graphics>
  </node>
  <node id="40752" label="ENSMUSG00000030762" cy:nodeId="1692">
    <graphics z="0.0" y="177.99636840820312" x="22.559303283691406">
      <att name="lockedVisualProperties" type="list" cy:type="List">
        <att name="NODE_LABEL" value="" type="string" cy:type="String"/>
      </att>
    </graphics>
  </node>
  <node id="40753" label="ENSMUSG00000039470" cy:nodeId="672">
    <graphics z="0.0" y="648.7130737304688" x="377.55657958984375">
      <att name="lockedVisualProperties" type="list" cy:type="List">
        <att name="NODE_LABEL" value="" type="string" cy:type="String"/>
      </att>
    </graphics>
  </node>
  <node id="40754" label="ENSMUSG00000039683" cy:nodeId="673">
    <graphics z="0.0" y="454.2392578125" x="518.7384033203125">
      <att name="lockedVisualProperties" type="list" cy:type="List">
        <att name="NODE_LABEL" value="" type="string" cy:type="String"/>
      </att>
    </graphics>
  </node>
  <node id="40755" label="ENSMUSG00000109084" cy:nodeId="2721">
    <graphics z="0.0" y="231.19468688964844" x="281.380126953125">
      <att name="lockedVisualProperties" type="list" cy:type="List">
        <att name="NODE_LABEL" value="" type="string" cy:type="String"/>
      </att>
    </graphics>
  </node>
  <node id="40756" label="ENSMUSG00000099025" cy:nodeId="2723">
    <graphics z="0.0" y="51.680381774902344" x="132.08206176757812">
      <att name="lockedVisualProperties" type="list" cy:type="List">
        <att name="NODE_LABEL" value="" type="string" cy:type="String"/>
      </att>
    </graphics>
  </node>
  <node id="40757" label="ENSMUSG00000111528" cy:nodeId="2725">
    <graphics z="0.0" y="223.28091430664062" x="9.064872741699219">
      <att name="lockedVisualProperties" type="list" cy:type="List">
        <att name="NODE_LABEL" value="" type="string" cy:type="String"/>
      </att>
    </graphics>
  </node>
  <node id="40758" label="ENSMUSG00000039911" cy:nodeId="678">
    <graphics z="0.0" y="641.1884155273438" x="375.63250732421875">
      <att name="lockedVisualProperties" type="list" cy:type="List">
        <att name="NODE_LABEL" value="" type="string" cy:type="String"/>
      </att>
    </graphics>
  </node>
  <node id="40759" label="ENSMUSG00000040084" cy:nodeId="679">
    <graphics z="0.0" y="586.6632690429688" x="506.7249755859375">
      <att name="lockedVisualProperties" type="list" cy:type="List">
        <att name="NODE_LABEL" value="" type="string" cy:type="String"/>
      </att>
    </graphics>
  </node>
  <node id="40760" label="ENSMUSG00000040280" cy:nodeId="683">
    <graphics z="0.0" y="434.8050231933594" x="308.6766052246094">
      <att name="lockedVisualProperties" type="list" cy:type="List">
        <att name="NODE_LABEL" value="" type="string" cy:type="String"/>
      </att>
    </graphics>
  </node>
  <node id="40761" label="ENSMUSG00000102106" cy:nodeId="2732">
    <graphics z="0.0" y="348.01617431640625" x="106.12692260742188">
      <att name="lockedVisualProperties" type="list" cy:type="List">
        <att name="NODE_LABEL" value="" type="string" cy:type="String"/>
      </att>
    </graphics>
  </node>
  <node id="40762" label="ENSMUSG00000075010" cy:nodeId="2733">
    <graphics z="0.0" y="584.42236328125" x="440.3545837402344">
      <att name="lockedVisualProperties" type="list" cy:type="List">
        <att name="NODE_LABEL" value="" type="string" cy:type="String"/>
      </att>
    </graphics>
  </node>
  <node id="40763" label="ENSMUSG00000040430" cy:nodeId="686">
    <graphics z="0.0" y="337.650634765625" x="131.72140502929688">
      <att name="lockedVisualProperties" type="list" cy:type="List">
        <att name="NODE_LABEL" value="" type="string" cy:type="String"/>
      </att>
    </graphics>
  </node>
  <node id="40764" label="ENSMUSG00000031367" cy:nodeId="1710">
    <graphics z="0.0" y="533.4989624023438" x="500.9774169921875">
      <att name="lockedVisualProperties" type="list" cy:type="List">
        <att name="NODE_LABEL" value="" type="string" cy:type="String"/>
      </att>
    </graphics>
  </node>
  <node id="40765" label="ENSMUSG00000031375" cy:nodeId="1711">
    <graphics z="0.0" y="152.07431030273438" x="93.26620483398438">
      <att name="lockedVisualProperties" type="list" cy:type="List">
        <att name="NODE_LABEL" value="" type="string" cy:type="String"/>
      </att>
    </graphics>
  </node>
  <node id="40766" label="ENSMUSG00000040433" cy:nodeId="687">
    <graphics z="0.0" y="267.2342224121094" x="242.73764038085938">
      <att name="lockedVisualProperties" type="list" cy:type="List">
        <att name="NODE_LABEL" value="" type="string" cy:type="String"/>
      </att>
    </graphics>
  </node>
  <node id="40767" label="ENSMUSG00000040447" cy:nodeId="688">
    <graphics z="0.0" y="351.0101013183594" x="88.26560974121094">
      <att name="lockedVisualProperties" type="list" cy:type="List">
        <att name="NODE_LABEL" value="" type="string" cy:type="String"/>
      </att>
    </graphics>
  </node>
  <node id="40768" label="ENSMUSG00000040462" cy:nodeId="689">
    <graphics z="0.0" y="369.9761962890625" x="263.46026611328125">
      <att name="lockedVisualProperties" type="list" cy:type="List">
        <att name="NODE_LABEL" value="" type="string" cy:type="String"/>
      </att>
    </graphics>
  </node>
  <node id="40769" label="ENSMUSG00000040631" cy:nodeId="691">
    <graphics z="0.0" y="553.3375244140625" x="110.47660827636719">
      <att name="lockedVisualProperties" type="list" cy:type="List">
        <att name="NODE_LABEL" value="" type="string" cy:type="String"/>
      </att>
    </graphics>
  </node>
  <node id="40770" label="ENSMUSG00000085329" cy:nodeId="2740">
    <graphics z="0.0" y="586.7067260742188" x="374.038330078125">
      <att name="lockedVisualProperties" type="list" cy:type="List">
        <att name="NODE_LABEL" value="" type="string" cy:type="String"/>
      </att>
    </graphics>
  </node>
  <node id="40771" label="ENSMUSG00000040852" cy:nodeId="693">
    <graphics z="0.0" y="340.136474609375" x="255.90939331054688">
      <att name="lockedVisualProperties" type="list" cy:type="List">
        <att name="NODE_LABEL" value="" type="string" cy:type="String"/>
      </att>
    </graphics>
  </node>
  <node id="40772" label="ENSMUSG00000044522" cy:nodeId="2741">
    <graphics z="0.0" y="508.8646240234375" x="53.05747985839844">
      <att name="lockedVisualProperties" type="list" cy:type="List">
        <att name="NODE_LABEL" value="" type="string" cy:type="String"/>
      </att>
    </graphics>
  </node>
  <node id="40773" label="ENSMUSG00000040918" cy:nodeId="694">
    <graphics z="0.0" y="161.2620391845703" x="21.087154388427734">
      <att name="lockedVisualProperties" type="list" cy:type="List">
        <att name="NODE_LABEL" value="" type="string" cy:type="String"/>
      </att>
    </graphics>
  </node>
  <node id="40774" label="ENSMUSG00000031520" cy:nodeId="1718">
    <graphics z="0.0" y="611.220458984375" x="295.7140808105469">
      <att name="lockedVisualProperties" type="list" cy:type="List">
        <att name="NODE_LABEL" value="" type="string" cy:type="String"/>
      </att>
    </graphics>
  </node>
  <node id="40775" label="ENSMUSG00000041040" cy:nodeId="697">
    <graphics z="0.0" y="574.8681640625" x="169.18600463867188">
      <att name="lockedVisualProperties" type="list" cy:type="List">
        <att name="NODE_LABEL" value="" type="string" cy:type="String"/>
      </att>
    </graphics>
  </node>
  <node id="40776" label="ENSMUSG00000041058" cy:nodeId="698">
    <graphics z="0.0" y="200.3502655029297" x="108.91249084472656">
      <att name="lockedVisualProperties" type="list" cy:type="List">
        <att name="NODE_LABEL" value="" type="string" cy:type="String"/>
      </att>
    </graphics>
  </node>
  <node id="40777" label="ENSMUSG00000041064" cy:nodeId="699">
    <graphics z="0.0" y="405.6814880371094" x="102.64765930175781">
      <att name="lockedVisualProperties" type="list" cy:type="List">
        <att name="NODE_LABEL" value="" type="string" cy:type="String"/>
      </att>
    </graphics>
  </node>
  <node id="40778" label="mmu-miR-1945" cy:nodeId="2748">
    <graphics z="0.0" y="507.07421875" x="279.64996337890625">
      <att name="lockedVisualProperties" type="list" cy:type="List">
        <att name="NODE_LABEL" value="" type="string" cy:type="String"/>
      </att>
    </graphics>
  </node>
  <node id="40779" label="ENSMUSG00000031725" cy:nodeId="1728">
    <graphics z="0.0" y="619.5795288085938" x="328.87274169921875">
      <att name="lockedVisualProperties" type="list" cy:type="List">
        <att name="NODE_LABEL" value="" type="string" cy:type="String"/>
      </att>
    </graphics>
  </node>
  <node id="40780" label="ENSMUSG00000031765" cy:nodeId="1729">
    <graphics z="0.0" y="117.05543518066406" x="294.08575439453125">
      <att name="lockedVisualProperties" type="list" cy:type="List">
        <att name="NODE_LABEL" value="" type="string" cy:type="String"/>
      </att>
    </graphics>
  </node>
  <node id="40781" label="ENSMUSG00000041219" cy:nodeId="706">
    <graphics z="0.0" y="446.6126708984375" x="328.0916442871094">
      <att name="lockedVisualProperties" type="list" cy:type="List">
        <att name="NODE_LABEL" value="" type="string" cy:type="String"/>
      </att>
    </graphics>
  </node>
  <node id="40782" label="ENSMUSG00000041268" cy:nodeId="707">
    <graphics z="0.0" y="305.1940612792969" x="587.6910400390625">
      <att name="lockedVisualProperties" type="list" cy:type="List">
        <att name="NODE_LABEL" value="" type="string" cy:type="String"/>
      </att>
    </graphics>
  </node>
  <node id="40783" label="ENSMUSG00000041431" cy:nodeId="708">
    <graphics z="0.0" y="122.64279174804688" x="149.37362670898438">
      <att name="lockedVisualProperties" type="list" cy:type="List">
        <att name="NODE_LABEL" value="" type="string" cy:type="String"/>
      </att>
    </graphics>
  </node>
  <node id="40784" label="ENSMUSG00000041548" cy:nodeId="709">
    <graphics z="0.0" y="8.115615844726562" x="192.75387573242188">
      <att name="lockedVisualProperties" type="list" cy:type="List">
        <att name="NODE_LABEL" value="" type="string" cy:type="String"/>
      </att>
    </graphics>
  </node>
  <node id="40785" label="ENSMUSG00000041733" cy:nodeId="713">
    <graphics z="0.0" y="454.140869140625" x="86.65473937988281">
      <att name="lockedVisualProperties" type="list" cy:type="List">
        <att name="NODE_LABEL" value="" type="string" cy:type="String"/>
      </att>
    </graphics>
  </node>
  <node id="40786" label="ENSMUSG00000031891" cy:nodeId="1739">
    <graphics z="0.0" y="705.9817504882812" x="245.93435668945312">
      <att name="lockedVisualProperties" type="list" cy:type="List">
        <att name="NODE_LABEL" value="" type="string" cy:type="String"/>
      </att>
    </graphics>
  </node>
  <node id="40787" label="ENSMUSG00000041930" cy:nodeId="715">
    <graphics z="0.0" y="400.94635009765625" x="55.41542053222656">
      <att name="lockedVisualProperties" type="list" cy:type="List">
        <att name="NODE_LABEL" value="" type="string" cy:type="String"/>
      </att>
    </graphics>
  </node>
  <node id="40788" label="ENSMUSG00000042035" cy:nodeId="716">
    <graphics z="0.0" y="164.8372039794922" x="302.28118896484375">
      <att name="lockedVisualProperties" type="list" cy:type="List">
        <att name="NODE_LABEL" value="" type="string" cy:type="String"/>
      </att>
    </graphics>
  </node>
  <node id="40789" label="ENSMUSG00000042096" cy:nodeId="718">
    <graphics z="0.0" y="525.6100463867188" x="354.6980895996094">
      <att name="lockedVisualProperties" type="list" cy:type="List">
        <att name="NODE_LABEL" value="" type="string" cy:type="String"/>
      </att>
    </graphics>
  </node>
  <node id="40790" label="ENSMUSG00000031957" cy:nodeId="1743">
    <graphics z="0.0" y="92.01544189453125" x="359.576171875">
      <att name="lockedVisualProperties" type="list" cy:type="List">
        <att name="NODE_LABEL" value="" type="string" cy:type="String"/>
      </att>
    </graphics>
  </node>
  <node id="40791" label="ENSMUSG00000042109" cy:nodeId="720">
    <graphics z="0.0" y="209.64920043945312" x="517.2202758789062">
      <att name="lockedVisualProperties" type="list" cy:type="List">
        <att name="NODE_LABEL" value="" type="string" cy:type="String"/>
      </att>
    </graphics>
  </node>
  <node id="40792" label="ENSMUSG00000042115" cy:nodeId="721">
    <graphics z="0.0" y="99.97547912597656" x="58.72105407714844">
      <att name="lockedVisualProperties" type="list" cy:type="List">
        <att name="NODE_LABEL" value="" type="string" cy:type="String"/>
      </att>
    </graphics>
  </node>
  <node id="40793" label="ENSMUSG00000032014" cy:nodeId="1745">
    <graphics z="0.0" y="240.60293579101562" x="538.687744140625">
      <att name="lockedVisualProperties" type="list" cy:type="List">
        <att name="NODE_LABEL" value="" type="string" cy:type="String"/>
      </att>
    </graphics>
  </node>
  <node id="40794" label="ENSMUSG00000032026" cy:nodeId="1746">
    <graphics z="0.0" y="11.660364151000977" x="254.18511962890625">
      <att name="lockedVisualProperties" type="list" cy:type="List">
        <att name="NODE_LABEL" value="" type="string" cy:type="String"/>
      </att>
    </graphics>
  </node>
  <node id="40795" label="ENSMUSG00000042258" cy:nodeId="723">
    <graphics z="0.0" y="525.2539672851562" x="290.66204833984375">
      <att name="lockedVisualProperties" type="list" cy:type="List">
        <att name="NODE_LABEL" value="" type="string" cy:type="String"/>
      </att>
    </graphics>
  </node>
  <node id="40796" label="ENSMUSG00000042303" cy:nodeId="724">
    <graphics z="0.0" y="330.0948181152344" x="553.3460083007812">
      <att name="lockedVisualProperties" type="list" cy:type="List">
        <att name="NODE_LABEL" value="" type="string" cy:type="String"/>
      </att>
    </graphics>
  </node>
  <node id="40797" label="ENSMUSG00000042333" cy:nodeId="726">
    <graphics z="0.0" y="97.46489715576172" x="464.1761474609375">
      <att name="lockedVisualProperties" type="list" cy:type="List">
        <att name="NODE_LABEL" value="" type="string" cy:type="String"/>
      </att>
    </graphics>
  </node>
  <node id="40798" label="ENSMUSG00000043068" cy:nodeId="734">
    <graphics z="0.0" y="696.0446166992188" x="181.27931213378906">
      <att name="lockedVisualProperties" type="list" cy:type="List">
        <att name="NODE_LABEL" value="" type="string" cy:type="String"/>
      </att>
    </graphics>
  </node>
  <node id="40799" label="ENSMUSG00000032278" cy:nodeId="1759">
    <graphics z="0.0" y="134.07179260253906" x="426.92236328125">
      <att name="lockedVisualProperties" type="list" cy:type="List">
        <att name="NODE_LABEL" value="" type="string" cy:type="String"/>
      </att>
    </graphics>
  </node>
  <node id="40800" label="ENSMUSG00000044072" cy:nodeId="739">
    <graphics z="0.0" y="75.70707702636719" x="137.78858947753906">
      <att name="lockedVisualProperties" type="list" cy:type="List">
        <att name="NODE_LABEL" value="" type="string" cy:type="String"/>
      </att>
    </graphics>
  </node>
  <node id="40801" label="ENSMUSG00000044254" cy:nodeId="742">
    <graphics z="0.0" y="609.7651977539062" x="230.0242919921875">
      <att name="lockedVisualProperties" type="list" cy:type="List">
        <att name="NODE_LABEL" value="" type="string" cy:type="String"/>
      </att>
    </graphics>
  </node>
  <node id="40802" label="ENSMUSG00000032380" cy:nodeId="1768">
    <graphics z="0.0" y="212.82008361816406" x="356.76373291015625">
      <att name="lockedVisualProperties" type="list" cy:type="List">
        <att name="NODE_LABEL" value="" type="string" cy:type="String"/>
      </att>
    </graphics>
  </node>
  <node id="40803" label="ENSMUSG00000032431" cy:nodeId="1770">
    <graphics z="0.0" y="-94.164794921875" x="196.80213928222656">
      <att name="lockedVisualProperties" type="list" cy:type="List">
        <att name="NODE_LABEL" value="" type="string" cy:type="String"/>
      </att>
    </graphics>
  </node>
  <node id="40804" label="ENSMUSG00000044646" cy:nodeId="747">
    <graphics z="0.0" y="140.21823120117188" x="407.9701843261719">
      <att name="lockedVisualProperties" type="list" cy:type="List">
        <att name="NODE_LABEL" value="" type="string" cy:type="String"/>
      </att>
    </graphics>
  </node>
  <node id="40805" label="ENSMUSG00000044674" cy:nodeId="748">
    <graphics z="0.0" y="607.0426025390625" x="151.16055297851562">
      <att name="lockedVisualProperties" type="list" cy:type="List">
        <att name="NODE_LABEL" value="" type="string" cy:type="String"/>
      </att>
    </graphics>
  </node>
  <node id="40806" label="ENSMUSG00000045094" cy:nodeId="751">
    <graphics z="0.0" y="109.51124572753906" x="421.14178466796875">
      <att name="lockedVisualProperties" type="list" cy:type="List">
        <att name="NODE_LABEL" value="" type="string" cy:type="String"/>
      </att>
    </graphics>
  </node>
  <node id="40807" label="ENSMUSG00000045349" cy:nodeId="754">
    <graphics z="0.0" y="689.3112182617188" x="104.80831909179688">
      <att name="lockedVisualProperties" type="list" cy:type="List">
        <att name="NODE_LABEL" value="" type="string" cy:type="String"/>
      </att>
    </graphics>
  </node>
  <node id="40808" label="ENSMUSG00000045382" cy:nodeId="755">
    <graphics z="0.0" y="198.12728881835938" x="489.64727783203125">
      <att name="lockedVisualProperties" type="list" cy:type="List">
        <att name="NODE_LABEL" value="" type="string" cy:type="String"/>
      </att>
    </graphics>
  </node>
  <node id="40809" label="ENSMUSG00000045629" cy:nodeId="757">
    <graphics z="0.0" y="496.3233642578125" x="502.2666015625">
      <att name="lockedVisualProperties" type="list" cy:type="List">
        <att name="NODE_LABEL" value="" type="string" cy:type="String"/>
      </att>
    </graphics>
  </node>
  <node id="40810" label="ENSMUSG00000046058" cy:nodeId="760">
    <graphics z="0.0" y="219.21041355072526" x="624.1520390766277">
      <att name="lockedVisualProperties" type="list" cy:type="List">
        <att name="NODE_LABEL" value="" type="string" cy:type="String"/>
      </att>
    </graphics>
  </node>
  <node id="40811" label="ENSMUSG00000032855" cy:nodeId="1784">
    <graphics z="0.0" y="457.19195556640625" x="214.0461883544922">
      <att name="lockedVisualProperties" type="list" cy:type="List">
        <att name="NODE_LABEL" value="" type="string" cy:type="String"/>
      </att>
    </graphics>
  </node>
  <node id="40812" label="ENSMUSG00000046070" cy:nodeId="761">
    <graphics z="0.0" y="481.2289733886719" x="83.7432861328125">
      <att name="lockedVisualProperties" type="list" cy:type="List">
        <att name="NODE_LABEL" value="" type="string" cy:type="String"/>
      </att>
    </graphics>
  </node>
  <node id="40813" label="ENSMUSG00000046093" cy:nodeId="762">
    <graphics z="0.0" y="74.635986328125" x="424.93359375">
      <att name="lockedVisualProperties" type="list" cy:type="List">
        <att name="NODE_LABEL" value="" type="string" cy:type="String"/>
      </att>
    </graphics>
  </node>
  <node id="40814" label="ENSMUSG00000046223" cy:nodeId="764">
    <graphics z="0.0" y="459.4120788574219" x="-73.3797378540039">
      <att name="lockedVisualProperties" type="list" cy:type="List">
        <att name="NODE_LABEL" value="" type="string" cy:type="String"/>
      </att>
    </graphics>
  </node>
  <node id="40815" label="ENSMUSG00000046242" cy:nodeId="765">
    <graphics z="0.0" y="332.07244873046875" x="53.789581298828125">
      <att name="lockedVisualProperties" type="list" cy:type="List">
        <att name="NODE_LABEL" value="" type="string" cy:type="String"/>
      </att>
    </graphics>
  </node>
  <node id="40816" label="ENSMUSG00000033083" cy:nodeId="1790">
    <graphics z="0.0" y="296.7048034667969" x="-91.53678894042969">
      <att name="lockedVisualProperties" type="list" cy:type="List">
        <att name="NODE_LABEL" value="" type="string" cy:type="String"/>
      </att>
    </graphics>
  </node>
  <node id="40817" label="ENSMUSG00000033107" cy:nodeId="1791">
    <graphics z="0.0" y="486.6036682128906" x="442.49884033203125">
      <att name="lockedVisualProperties" type="list" cy:type="List">
        <att name="NODE_LABEL" value="" type="string" cy:type="String"/>
      </att>
    </graphics>
  </node>
  <node id="40818" label="ENSMUSG00000046546" cy:nodeId="767">
    <graphics z="0.0" y="165.33462524414062" x="418.8168029785156">
      <att name="lockedVisualProperties" type="list" cy:type="List">
        <att name="NODE_LABEL" value="" type="string" cy:type="String"/>
      </att>
    </graphics>
  </node>
  <node id="40819" label="ENSMUSG00000033147" cy:nodeId="1792">
    <graphics z="0.0" y="499.7685546875" x="-15.406509399414062">
      <att name="lockedVisualProperties" type="list" cy:type="List">
        <att name="NODE_LABEL" value="" type="string" cy:type="String"/>
      </att>
    </graphics>
  </node>
  <node id="40820" label="ENSMUSG00000033177" cy:nodeId="1793">
    <graphics z="0.0" y="142.8281707763672" x="483.1029052734375">
      <att name="lockedVisualProperties" type="list" cy:type="List">
        <att name="NODE_LABEL" value="" type="string" cy:type="String"/>
      </att>
    </graphics>
  </node>
  <node id="40821" label="ENSMUSG00000046814" cy:nodeId="772">
    <graphics z="0.0" y="500.27740478515625" x="276.4139709472656">
      <att name="lockedVisualProperties" type="list" cy:type="List">
        <att name="NODE_LABEL" value="" type="string" cy:type="String"/>
      </att>
    </graphics>
  </node>
  <node id="40822" label="ENSMUSG00000047139" cy:nodeId="774">
    <graphics z="0.0" y="585.8246459960938" x="17.50433349609375">
      <att name="lockedVisualProperties" type="list" cy:type="List">
        <att name="NODE_LABEL" value="" type="string" cy:type="String"/>
      </att>
    </graphics>
  </node>
  <node id="40823" label="mmu-miR-125b-5p" cy:nodeId="2826">
    <graphics z="0.0" y="459.4144592285156" x="242.99874877929688">
      <att name="lockedVisualProperties" type="list" cy:type="List">
        <att name="NODE_LABEL" value="" type="string" cy:type="String"/>
      </att>
    </graphics>
  </node>
  <node id="40824" label="ENSMUSG00000033610" cy:nodeId="1803">
    <graphics z="0.0" y="477.2156066894531" x="30.205711364746094">
      <att name="lockedVisualProperties" type="list" cy:type="List">
        <att name="NODE_LABEL" value="" type="string" cy:type="String"/>
      </att>
    </graphics>
  </node>
  <node id="40825" label="ENSMUSG00000047797" cy:nodeId="780">
    <graphics z="0.0" y="262.3699035644531" x="362.41522216796875">
      <att name="lockedVisualProperties" type="list" cy:type="List">
        <att name="NODE_LABEL" value="" type="string" cy:type="String"/>
      </att>
    </graphics>
  </node>
  <node id="40826" label="ENSMUSG00000047907" cy:nodeId="781">
    <graphics z="0.0" y="696.931884765625" x="286.7129821777344">
      <att name="lockedVisualProperties" type="list" cy:type="List">
        <att name="NODE_LABEL" value="" type="string" cy:type="String"/>
      </att>
    </graphics>
  </node>
  <node id="40827" label="ENSMUSG00000047976" cy:nodeId="783">
    <graphics z="0.0" y="479.1483459472656" x="34.205291748046875">
      <att name="lockedVisualProperties" type="list" cy:type="List">
        <att name="NODE_LABEL" value="" type="string" cy:type="String"/>
      </att>
    </graphics>
  </node>
  <node id="40828" label="ENSMUSG00000048058" cy:nodeId="784">
    <graphics z="0.0" y="147.66012573242188" x="131.17906188964844">
      <att name="lockedVisualProperties" type="list" cy:type="List">
        <att name="NODE_LABEL" value="" type="string" cy:type="String"/>
      </att>
    </graphics>
  </node>
  <node id="40829" label="ENSMUSG00000048217" cy:nodeId="785">
    <graphics z="0.0" y="239.77554321289062" x="299.17529296875">
      <att name="lockedVisualProperties" type="list" cy:type="List">
        <att name="NODE_LABEL" value="" type="string" cy:type="String"/>
      </att>
    </graphics>
  </node>
  <node id="40830" label="ENSMUSG00000033917" cy:nodeId="1811">
    <graphics z="0.0" y="637.2374877929688" x="300.8724365234375">
      <att name="lockedVisualProperties" type="list" cy:type="List">
        <att name="NODE_LABEL" value="" type="string" cy:type="String"/>
      </att>
    </graphics>
  </node>
  <node id="40831" label="ENSMUSG00000048376" cy:nodeId="787">
    <graphics z="0.0" y="480.5445556640625" x="53.98992919921875">
      <att name="lockedVisualProperties" type="list" cy:type="List">
        <att name="NODE_LABEL" value="" type="string" cy:type="String"/>
      </att>
    </graphics>
  </node>
  <node id="40832" label="ENSMUSG00000048440" cy:nodeId="788">
    <graphics z="0.0" y="406.2440185546875" x="489.05755615234375">
      <att name="lockedVisualProperties" type="list" cy:type="List">
        <att name="NODE_LABEL" value="" type="string" cy:type="String"/>
      </att>
    </graphics>
  </node>
  <node id="40833" label="ENSMUSG00000048458" cy:nodeId="790">
    <graphics z="0.0" y="235.42337036132812" x="477.33416748046875">
      <att name="lockedVisualProperties" type="list" cy:type="List">
        <att name="NODE_LABEL" value="" type="string" cy:type="String"/>
      </att>
    </graphics>
  </node>
  <node id="40834" label="ENSMUSG00000049184" cy:nodeId="796">
    <graphics z="0.0" y="394.3490295410156" x="261.7421875">
      <att name="lockedVisualProperties" type="list" cy:type="List">
        <att name="NODE_LABEL" value="" type="string" cy:type="String"/>
      </att>
    </graphics>
  </node>
  <node id="40835" label="ENSMUSG00000034687" cy:nodeId="1825">
    <graphics z="0.0" y="289.79962158203125" x="459.0621337890625">
      <att name="lockedVisualProperties" type="list" cy:type="List">
        <att name="NODE_LABEL" value="" type="string" cy:type="String"/>
      </att>
    </graphics>
  </node>
  <node id="40836" label="ENSMUSG00000049580" cy:nodeId="801">
    <graphics z="0.0" y="480.26190185546875" x="422.86407470703125">
      <att name="lockedVisualProperties" type="list" cy:type="List">
        <att name="NODE_LABEL" value="" type="string" cy:type="String"/>
      </att>
    </graphics>
  </node>
  <node id="40837" label="ENSMUSG00000049588" cy:nodeId="802">
    <graphics z="0.0" y="204.80233764648438" x="193.3836212158203">
      <att name="lockedVisualProperties" type="list" cy:type="List">
        <att name="NODE_LABEL" value="" type="string" cy:type="String"/>
      </att>
    </graphics>
  </node>
  <node id="40838" label="ENSMUSG00000034768" cy:nodeId="1827">
    <graphics z="0.0" y="334.7099914550781" x="181.78477478027344">
      <att name="lockedVisualProperties" type="list" cy:type="List">
        <att name="NODE_LABEL" value="" type="string" cy:type="String"/>
      </att>
    </graphics>
  </node>
  <node id="40839" label="ENSMUSG00000049878" cy:nodeId="806">
    <graphics z="0.0" y="213.13369750976562" x="235.26068115234375">
      <att name="lockedVisualProperties" type="list" cy:type="List">
        <att name="NODE_LABEL" value="" type="string" cy:type="String"/>
      </att>
    </graphics>
  </node>
  <node id="40840" label="ENSMUSG00000050064" cy:nodeId="807">
    <graphics z="0.0" y="627.17041015625" x="93.68905639648438">
      <att name="lockedVisualProperties" type="list" cy:type="List">
        <att name="NODE_LABEL" value="" type="string" cy:type="String"/>
      </att>
    </graphics>
  </node>
  <node id="40841" label="ENSMUSG00000035239" cy:nodeId="1835">
    <graphics z="0.0" y="24.906307220458984" x="334.4706726074219">
      <att name="lockedVisualProperties" type="list" cy:type="List">
        <att name="NODE_LABEL" value="" type="string" cy:type="String"/>
      </att>
    </graphics>
  </node>
  <node id="40842" label="ENSMUSG00000050721" cy:nodeId="813">
    <graphics z="0.0" y="225.5277557373047" x="238.2628173828125">
      <att name="lockedVisualProperties" type="list" cy:type="List">
        <att name="NODE_LABEL" value="" type="string" cy:type="String"/>
      </att>
    </graphics>
  </node>
  <node id="40843" label="ENSMUSG00000050737" cy:nodeId="814">
    <graphics z="0.0" y="508.60589599609375" x="444.9617004394531">
      <att name="lockedVisualProperties" type="list" cy:type="List">
        <att name="NODE_LABEL" value="" type="string" cy:type="String"/>
      </att>
    </graphics>
  </node>
  <node id="40844" label="ENSMUSG00000050777" cy:nodeId="815">
    <graphics z="0.0" y="132.34628295898438" x="63.20294189453125">
      <att name="lockedVisualProperties" type="list" cy:type="List">
        <att name="NODE_LABEL" value="" type="string" cy:type="String"/>
      </att>
    </graphics>
  </node>
  <node id="40845" label="ENSMUSG00000051343" cy:nodeId="818">
    <graphics z="0.0" y="155.65960693359375" x="326.4235534667969">
      <att name="lockedVisualProperties" type="list" cy:type="List">
        <att name="NODE_LABEL" value="" type="string" cy:type="String"/>
      </att>
    </graphics>
  </node>
  <node id="40846" label="ENSMUSG00000035561" cy:nodeId="1842">
    <graphics z="0.0" y="247.91342163085938" x="330.8487243652344">
      <att name="lockedVisualProperties" type="list" cy:type="List">
        <att name="NODE_LABEL" value="" type="string" cy:type="String"/>
      </att>
    </graphics>
  </node>
  <node id="40847" label="ENSMUSG00000051727" cy:nodeId="820">
    <graphics z="0.0" y="202.94253540039062" x="206.59976196289062">
      <att name="lockedVisualProperties" type="list" cy:type="List">
        <att name="NODE_LABEL" value="" type="string" cy:type="String"/>
      </att>
    </graphics>
  </node>
  <node id="40848" label="ENSMUSG00000035711" cy:nodeId="1845">
    <graphics z="0.0" y="122.89570617675781" x="-49.96272277832031">
      <att name="lockedVisualProperties" type="list" cy:type="List">
        <att name="NODE_LABEL" value="" type="string" cy:type="String"/>
      </att>
    </graphics>
  </node>
  <node id="40849" label="ENSMUSG00000052105" cy:nodeId="824">
    <graphics z="0.0" y="404.682861328125" x="27.239517211914062">
      <att name="lockedVisualProperties" type="list" cy:type="List">
        <att name="NODE_LABEL" value="" type="string" cy:type="String"/>
      </att>
    </graphics>
  </node>
  <node id="40850" label="ENSMUSG00000052560" cy:nodeId="827">
    <graphics z="0.0" y="215.17300415039062" x="394.64630126953125">
      <att name="lockedVisualProperties" type="list" cy:type="List">
        <att name="NODE_LABEL" value="" type="string" cy:type="String"/>
      </att>
    </graphics>
  </node>
  <node id="40851" label="ENSMUSG00000053080" cy:nodeId="831">
    <graphics z="0.0" y="178.97718811035156" x="504.42022705078125">
      <att name="lockedVisualProperties" type="list" cy:type="List">
        <att name="NODE_LABEL" value="" type="string" cy:type="String"/>
      </att>
    </graphics>
  </node>
  <node id="40852" label="ENSMUSG00000036123" cy:nodeId="1857">
    <graphics z="0.0" y="26.892459869384766" x="225.46017456054688">
      <att name="lockedVisualProperties" type="list" cy:type="List">
        <att name="NODE_LABEL" value="" type="string" cy:type="String"/>
      </att>
    </graphics>
  </node>
  <node id="40853" label="ENSMUSG00000053334" cy:nodeId="834">
    <graphics z="0.0" y="582.2581787109375" x="179.8152313232422">
      <att name="lockedVisualProperties" type="list" cy:type="List">
        <att name="NODE_LABEL" value="" type="string" cy:type="String"/>
      </att>
    </graphics>
  </node>
  <node id="40854" label="ENSMUSG00000053460" cy:nodeId="835">
    <graphics z="0.0" y="504.211181640625" x="224.56243896484375">
      <att name="lockedVisualProperties" type="list" cy:type="List">
        <att name="NODE_LABEL" value="" type="string" cy:type="String"/>
      </att>
    </graphics>
  </node>
  <node id="40855" label="ENSMUSG00000036216" cy:nodeId="1860">
    <graphics z="0.0" y="119.752685546875" x="336.375244140625">
      <att name="lockedVisualProperties" type="list" cy:type="List">
        <att name="NODE_LABEL" value="" type="string" cy:type="String"/>
      </att>
    </graphics>
  </node>
  <node id="40856" label="ENSMUSG00000053470" cy:nodeId="836">
    <graphics z="0.0" y="469.14508056640625" x="158.5532989501953">
      <att name="lockedVisualProperties" type="list" cy:type="List">
        <att name="NODE_LABEL" value="" type="string" cy:type="String"/>
      </att>
    </graphics>
  </node>
  <node id="40857" label="ENSMUSG00000053580" cy:nodeId="837">
    <graphics z="0.0" y="448.80438232421875" x="39.800079345703125">
      <att name="lockedVisualProperties" type="list" cy:type="List">
        <att name="NODE_LABEL" value="" type="string" cy:type="String"/>
      </att>
    </graphics>
  </node>
  <node id="40858" label="ENSMUSG00000053765" cy:nodeId="839">
    <graphics z="0.0" y="261.2825927734375" x="64.69326782226562">
      <att name="lockedVisualProperties" type="list" cy:type="List">
        <att name="NODE_LABEL" value="" type="string" cy:type="String"/>
      </att>
    </graphics>
  </node>
  <node id="40859" label="ENSMUSG00000053846" cy:nodeId="842">
    <graphics z="0.0" y="177.19039916992188" x="511.84527587890625">
      <att name="lockedVisualProperties" type="list" cy:type="List">
        <att name="NODE_LABEL" value="" type="string" cy:type="String"/>
      </att>
    </graphics>
  </node>
  <node id="40860" label="ENSMUSG00000036368" cy:nodeId="1867">
    <graphics z="0.0" y="17.006458282470703" x="136.33700561523438">
      <att name="lockedVisualProperties" type="list" cy:type="List">
        <att name="NODE_LABEL" value="" type="string" cy:type="String"/>
      </att>
    </graphics>
  </node>
  <node id="40861" label="ENSMUSG00000054150" cy:nodeId="843">
    <graphics z="0.0" y="82.51099395751953" x="216.22994995117188">
      <att name="lockedVisualProperties" type="list" cy:type="List">
        <att name="NODE_LABEL" value="" type="string" cy:type="String"/>
      </att>
    </graphics>
  </node>
  <node id="40862" label="ENSMUSG00000036437" cy:nodeId="1868">
    <graphics z="0.0" y="284.4228515625" x="-19.858856201171875">
      <att name="lockedVisualProperties" type="list" cy:type="List">
        <att name="NODE_LABEL" value="" type="string" cy:type="String"/>
      </att>
    </graphics>
  </node>
  <node id="40863" label="ENSMUSG00000054474" cy:nodeId="845">
    <graphics z="0.0" y="472.5216064453125" x="277.8855895996094">
      <att name="lockedVisualProperties" type="list" cy:type="List">
        <att name="NODE_LABEL" value="" type="string" cy:type="String"/>
      </att>
    </graphics>
  </node>
  <node id="40864" label="ENSMUSG00000036526" cy:nodeId="1871">
    <graphics z="0.0" y="281.58905029296875" x="130.17840576171875">
      <att name="lockedVisualProperties" type="list" cy:type="List">
        <att name="NODE_LABEL" value="" type="string" cy:type="String"/>
      </att>
    </graphics>
  </node>
  <node id="40865" label="ENSMUSG00000054855" cy:nodeId="850">
    <graphics z="0.0" y="377.6618347167969" x="-34.574615478515625">
      <att name="lockedVisualProperties" type="list" cy:type="List">
        <att name="NODE_LABEL" value="" type="string" cy:type="String"/>
      </att>
    </graphics>
  </node>
  <node id="40866" label="ENSMUSG00000054893" cy:nodeId="851">
    <graphics z="0.0" y="-12.886161804199219" x="189.15065002441406">
      <att name="lockedVisualProperties" type="list" cy:type="List">
        <att name="NODE_LABEL" value="" type="string" cy:type="String"/>
      </att>
    </graphics>
  </node>
  <node id="40867" label="ENSMUSG00000036813" cy:nodeId="1875">
    <graphics z="0.0" y="534.6919555664062" x="3.133258819580078">
      <att name="lockedVisualProperties" type="list" cy:type="List">
        <att name="NODE_LABEL" value="" type="string" cy:type="String"/>
      </att>
    </graphics>
  </node>
  <node id="40868" label="ENSMUSG00000054967" cy:nodeId="852">
    <graphics z="0.0" y="241.62689208984375" x="421.0667724609375">
      <att name="lockedVisualProperties" type="list" cy:type="List">
        <att name="NODE_LABEL" value="" type="string" cy:type="String"/>
      </att>
    </graphics>
  </node>
  <node id="40869" label="ENSMUSG00000036880" cy:nodeId="1877">
    <graphics z="0.0" y="532.156494140625" x="146.44126892089844">
      <att name="lockedVisualProperties" type="list" cy:type="List">
        <att name="NODE_LABEL" value="" type="string" cy:type="String"/>
      </att>
    </graphics>
  </node>
  <node id="40870" label="ENSMUSG00000036944" cy:nodeId="1881">
    <graphics z="0.0" y="94.06144714355469" x="-1.9005355834960938">
      <att name="lockedVisualProperties" type="list" cy:type="List">
        <att name="NODE_LABEL" value="" type="string" cy:type="String"/>
      </att>
    </graphics>
  </node>
  <node id="40871" label="ENSMUSG00000056069" cy:nodeId="860">
    <graphics z="0.0" y="516.5809936523438" x="45.34553527832031">
      <att name="lockedVisualProperties" type="list" cy:type="List">
        <att name="NODE_LABEL" value="" type="string" cy:type="String"/>
      </att>
    </graphics>
  </node>
  <node id="40872" label="ENSMUSG00000037315" cy:nodeId="1886">
    <graphics z="0.0" y="296.18035888671875" x="66.55094909667969">
      <att name="lockedVisualProperties" type="list" cy:type="List">
        <att name="NODE_LABEL" value="" type="string" cy:type="String"/>
      </att>
    </graphics>
  </node>
  <node id="40873" label="ENSMUSG00000056529" cy:nodeId="862">
    <graphics z="0.0" y="510.44171142578125" x="521.5347900390625">
      <att name="lockedVisualProperties" type="list" cy:type="List">
        <att name="NODE_LABEL" value="" type="string" cy:type="String"/>
      </att>
    </graphics>
  </node>
  <node id="40874" label="ENSMUSG00000056737" cy:nodeId="865">
    <graphics z="0.0" y="633.5924072265625" x="111.88545227050781">
      <att name="lockedVisualProperties" type="list" cy:type="List">
        <att name="NODE_LABEL" value="" type="string" cy:type="String"/>
      </att>
    </graphics>
  </node>
  <node id="40875" label="ENSMUSG00000057092" cy:nodeId="868">
    <graphics z="0.0" y="195.417724609375" x="137.5499267578125">
      <att name="lockedVisualProperties" type="list" cy:type="List">
        <att name="NODE_LABEL" value="" type="string" cy:type="String"/>
      </att>
    </graphics>
  </node>
  <node id="40876" label="ENSMUSG00000037797" cy:nodeId="1895">
    <graphics z="0.0" y="164.9432373046875" x="466.60675048828125">
      <att name="lockedVisualProperties" type="list" cy:type="List">
        <att name="NODE_LABEL" value="" type="string" cy:type="String"/>
      </att>
    </graphics>
  </node>
  <node id="40877" label="ENSMUSG00000058145" cy:nodeId="873">
    <graphics z="0.0" y="243.21914672851562" x="39.26300048828125">
      <att name="lockedVisualProperties" type="list" cy:type="List">
        <att name="NODE_LABEL" value="" type="string" cy:type="String"/>
      </att>
    </graphics>
  </node>
  <node id="40878" label="ENSMUSG00000058672" cy:nodeId="876">
    <graphics z="0.0" y="476.800048828125" x="23.268959045410156">
      <att name="lockedVisualProperties" type="list" cy:type="List">
        <att name="NODE_LABEL" value="" type="string" cy:type="String"/>
      </att>
    </graphics>
  </node>
  <node id="40879" label="ENSMUSG00000038042" cy:nodeId="1903">
    <graphics z="0.0" y="623.9756469726562" x="112.65206909179688">
      <att name="lockedVisualProperties" type="list" cy:type="List">
        <att name="NODE_LABEL" value="" type="string" cy:type="String"/>
      </att>
    </graphics>
  </node>
  <node id="40880" label="ENSMUSG00000059493" cy:nodeId="881">
    <graphics z="0.0" y="179.1600799560547" x="-62.26251983642578">
      <att name="lockedVisualProperties" type="list" cy:type="List">
        <att name="NODE_LABEL" value="" type="string" cy:type="String"/>
      </att>
    </graphics>
  </node>
  <node id="40881" label="ENSMUSG00000059540" cy:nodeId="882">
    <graphics z="0.0" y="274.803955078125" x="-22.708572387695312">
      <att name="lockedVisualProperties" type="list" cy:type="List">
        <att name="NODE_LABEL" value="" type="string" cy:type="String"/>
      </att>
    </graphics>
  </node>
  <node id="40882" label="ENSMUSG00000038371" cy:nodeId="1908">
    <graphics z="0.0" y="148.80474853515625" x="453.7646179199219">
      <att name="lockedVisualProperties" type="list" cy:type="List">
        <att name="NODE_LABEL" value="" type="string" cy:type="String"/>
      </att>
    </graphics>
  </node>
  <node id="40883" label="ENSMUSG00000059824" cy:nodeId="884">
    <graphics z="0.0" y="323.29010009765625" x="-13.972480773925781">
      <att name="lockedVisualProperties" type="list" cy:type="List">
        <att name="NODE_LABEL" value="" type="string" cy:type="String"/>
      </att>
    </graphics>
  </node>
  <node id="40884" label="ENSMUSG00000038422" cy:nodeId="1910">
    <graphics z="0.0" y="447.691162109375" x="467.3837585449219">
      <att name="lockedVisualProperties" type="list" cy:type="List">
        <att name="NODE_LABEL" value="" type="string" cy:type="String"/>
      </att>
    </graphics>
  </node>
  <node id="40885" label="ENSMUSG00000060176" cy:nodeId="887">
    <graphics z="0.0" y="353.56170654296875" x="69.21183013916016">
      <att name="lockedVisualProperties" type="list" cy:type="List">
        <att name="NODE_LABEL" value="" type="string" cy:type="String"/>
      </att>
    </graphics>
  </node>
  <node id="40886" label="ENSMUSG00000038463" cy:nodeId="1911">
    <graphics z="0.0" y="439.9957580566406" x="503.82177734375">
      <att name="lockedVisualProperties" type="list" cy:type="List">
        <att name="NODE_LABEL" value="" type="string" cy:type="String"/>
      </att>
    </graphics>
  </node>
  <node id="40887" label="ENSMUSG00000038486" cy:nodeId="1912">
    <graphics z="0.0" y="307.6206359863281" x="504.41912841796875">
      <att name="lockedVisualProperties" type="list" cy:type="List">
        <att name="NODE_LABEL" value="" type="string" cy:type="String"/>
      </att>
    </graphics>
  </node>
  <node id="40888" label="ENSMUSG00000060962" cy:nodeId="892">
    <graphics z="0.0" y="719.6568045139221" x="76.9357370570168">
      <att name="lockedVisualProperties" type="list" cy:type="List">
        <att name="NODE_LABEL" value="" type="string" cy:type="String"/>
      </att>
    </graphics>
  </node>
  <node id="40889" label="ENSMUSG00000061531" cy:nodeId="894">
    <graphics z="0.0" y="420.092041015625" x="80.34471130371094">
      <att name="lockedVisualProperties" type="list" cy:type="List">
        <att name="NODE_LABEL" value="" type="string" cy:type="String"/>
      </att>
    </graphics>
  </node>
  <node id="40890" label="ENSMUSG00000061578" cy:nodeId="895">
    <graphics z="0.0" y="641.7777099609375" x="164.7904510498047">
      <att name="lockedVisualProperties" type="list" cy:type="List">
        <att name="NODE_LABEL" value="" type="string" cy:type="String"/>
      </att>
    </graphics>
  </node>
  <node id="40891" label="ENSMUSG00000061607" cy:nodeId="896">
    <graphics z="0.0" y="233.31846618652344" x="33.59486389160156">
      <att name="lockedVisualProperties" type="list" cy:type="List">
        <att name="NODE_LABEL" value="" type="string" cy:type="String"/>
      </att>
    </graphics>
  </node>
  <node id="40892" label="ENSMUSG00000062070" cy:nodeId="897">
    <graphics z="0.0" y="509.65618896484375" x="193.1834716796875">
      <att name="lockedVisualProperties" type="list" cy:type="List">
        <att name="NODE_LABEL" value="" type="string" cy:type="String"/>
      </att>
    </graphics>
  </node>
  <node id="40893" label="ENSMUSG00000038745" cy:nodeId="1922">
    <graphics z="0.0" y="522.0404663085938" x="65.45254516601562">
      <att name="lockedVisualProperties" type="list" cy:type="List">
        <att name="NODE_LABEL" value="" type="string" cy:type="String"/>
      </att>
    </graphics>
  </node>
  <node id="40894" label="ENSMUSG00000062078" cy:nodeId="898">
    <graphics z="0.0" y="159.09298706054688" x="16.811206817626953">
      <att name="lockedVisualProperties" type="list" cy:type="List">
        <att name="NODE_LABEL" value="" type="string" cy:type="String"/>
      </att>
    </graphics>
  </node>
  <node id="40895" label="ENSMUSG00000062248" cy:nodeId="899">
    <graphics z="0.0" y="96.65293884277344" x="15.186553955078125">
      <att name="lockedVisualProperties" type="list" cy:type="List">
        <att name="NODE_LABEL" value="" type="string" cy:type="String"/>
      </att>
    </graphics>
  </node>
  <node id="40896" label="ENSMUSG00000038836" cy:nodeId="1926">
    <graphics z="0.0" y="292.9453125" x="-53.93059539794922">
      <att name="lockedVisualProperties" type="list" cy:type="List">
        <att name="NODE_LABEL" value="" type="string" cy:type="String"/>
      </att>
    </graphics>
  </node>
  <node id="40897" label="ENSMUSG00000038903" cy:nodeId="1927">
    <graphics z="0.0" y="549.208251953125" x="247.0726318359375">
      <att name="lockedVisualProperties" type="list" cy:type="List">
        <att name="NODE_LABEL" value="" type="string" cy:type="String"/>
      </att>
    </graphics>
  </node>
  <node id="40898" label="ENSMUSG00000063229" cy:nodeId="903">
    <graphics z="0.0" y="81.15564727783203" x="317.60516357421875">
      <att name="lockedVisualProperties" type="list" cy:type="List">
        <att name="NODE_LABEL" value="" type="string" cy:type="String"/>
      </att>
    </graphics>
  </node>
  <node id="40899" label="ENSMUSG00000039114" cy:nodeId="1931">
    <graphics z="0.0" y="202.60592651367188" x="442.2803649902344">
      <att name="lockedVisualProperties" type="list" cy:type="List">
        <att name="NODE_LABEL" value="" type="string" cy:type="String"/>
      </att>
    </graphics>
  </node>
  <node id="40900" label="ENSMUSG00000064090" cy:nodeId="908">
    <graphics z="0.0" y="380.5600891113281" x="555.503173828125">
      <att name="lockedVisualProperties" type="list" cy:type="List">
        <att name="NODE_LABEL" value="" type="string" cy:type="String"/>
      </att>
    </graphics>
  </node>
  <node id="40901" label="ENSMUSG00000064202" cy:nodeId="909">
    <graphics z="0.0" y="161.06771850585938" x="419.6834411621094">
      <att name="lockedVisualProperties" type="list" cy:type="List">
        <att name="NODE_LABEL" value="" type="string" cy:type="String"/>
      </att>
    </graphics>
  </node>
  <node id="40902" label="ENSMUSG00000064215" cy:nodeId="910">
    <graphics z="0.0" y="431.6007080078125" x="305.0334777832031">
      <att name="lockedVisualProperties" type="list" cy:type="List">
        <att name="NODE_LABEL" value="" type="string" cy:type="String"/>
      </att>
    </graphics>
  </node>
  <node id="40903" label="ENSMUSG00000039158" cy:nodeId="1934">
    <graphics z="0.0" y="566.5599365234375" x="446.3399963378906">
      <att name="lockedVisualProperties" type="list" cy:type="List">
        <att name="NODE_LABEL" value="" type="string" cy:type="String"/>
      </att>
    </graphics>
  </node>
  <node id="40904" label="ENSMUSG00000064262" cy:nodeId="913">
    <graphics z="0.0" y="515.84912109375" x="-32.45539855957031">
      <att name="lockedVisualProperties" type="list" cy:type="List">
        <att name="NODE_LABEL" value="" type="string" cy:type="String"/>
      </att>
    </graphics>
  </node>
  <node id="40905" label="ENSMUSG00000039232" cy:nodeId="1939">
    <graphics z="0.0" y="435.42877197265625" x="548.7333374023438">
      <att name="lockedVisualProperties" type="list" cy:type="List">
        <att name="NODE_LABEL" value="" type="string" cy:type="String"/>
      </att>
    </graphics>
  </node>
  <node id="40906" label="ENSMUSG00000039323" cy:nodeId="1941">
    <graphics z="0.0" y="541.7620849609375" x="100.7919921875">
      <att name="lockedVisualProperties" type="list" cy:type="List">
        <att name="NODE_LABEL" value="" type="string" cy:type="String"/>
      </att>
    </graphics>
  </node>
  <node id="40907" label="ENSMUSG00000039616" cy:nodeId="1948">
    <graphics z="0.0" y="529.4376220703125" x="77.3658218383789">
      <att name="lockedVisualProperties" type="list" cy:type="List">
        <att name="NODE_LABEL" value="" type="string" cy:type="String"/>
      </att>
    </graphics>
  </node>
  <node id="40908" label="ENSMUSG00000068742" cy:nodeId="925">
    <graphics z="0.0" y="202.94046020507812" x="333.98126220703125">
      <att name="lockedVisualProperties" type="list" cy:type="List">
        <att name="NODE_LABEL" value="" type="string" cy:type="String"/>
      </att>
    </graphics>
  </node>
  <node id="40909" label="ENSMUSG00000069114" cy:nodeId="926">
    <graphics z="0.0" y="478.6197814941406" x="6.4941558837890625">
      <att name="lockedVisualProperties" type="list" cy:type="List">
        <att name="NODE_LABEL" value="" type="string" cy:type="String"/>
      </att>
    </graphics>
  </node>
  <node id="40910" label="ENSMUSG00000039648" cy:nodeId="1951">
    <graphics z="0.0" y="443.496337890625" x="537.4461059570312">
      <att name="lockedVisualProperties" type="list" cy:type="List">
        <att name="NODE_LABEL" value="" type="string" cy:type="String"/>
      </att>
    </graphics>
  </node>
  <node id="40911" label="ENSMUSG00000069170" cy:nodeId="927">
    <graphics z="0.0" y="594.7260131835938" x="428.1681213378906">
      <att name="lockedVisualProperties" type="list" cy:type="List">
        <att name="NODE_LABEL" value="" type="string" cy:type="String"/>
      </att>
    </graphics>
  </node>
  <node id="40912" label="ENSMUSG00000069255" cy:nodeId="928">
    <graphics z="0.0" y="92.3302230834961" x="274.64111328125">
      <att name="lockedVisualProperties" type="list" cy:type="List">
        <att name="NODE_LABEL" value="" type="string" cy:type="String"/>
      </att>
    </graphics>
  </node>
  <node id="40913" label="ENSMUSG00000070407" cy:nodeId="931">
    <graphics z="0.0" y="206.31671142578125" x="533.203369140625">
      <att name="lockedVisualProperties" type="list" cy:type="List">
        <att name="NODE_LABEL" value="" type="string" cy:type="String"/>
      </att>
    </graphics>
  </node>
  <node id="40914" label="ENSMUSG00000039943" cy:nodeId="1955">
    <graphics z="0.0" y="156.85317993164062" x="-18.277671813964844">
      <att name="lockedVisualProperties" type="list" cy:type="List">
        <att name="NODE_LABEL" value="" type="string" cy:type="String"/>
      </att>
    </graphics>
  </node>
  <node id="40915" label="ENSMUSG00000070687" cy:nodeId="932">
    <graphics z="0.0" y="324.4605712890625" x="565.4345703125">
      <att name="lockedVisualProperties" type="list" cy:type="List">
        <att name="NODE_LABEL" value="" type="string" cy:type="String"/>
      </att>
    </graphics>
  </node>
  <node id="40916" label="ENSMUSG00000070777" cy:nodeId="934">
    <graphics z="0.0" y="621.986083984375" x="126.35760498046875">
      <att name="lockedVisualProperties" type="list" cy:type="List">
        <att name="NODE_LABEL" value="" type="string" cy:type="String"/>
      </att>
    </graphics>
  </node>
  <node id="40917" label="ENSMUSG00000071226" cy:nodeId="936">
    <graphics z="0.0" y="568.0252685546875" x="497.92138671875">
      <att name="lockedVisualProperties" type="list" cy:type="List">
        <att name="NODE_LABEL" value="" type="string" cy:type="String"/>
      </att>
    </graphics>
  </node>
  <node id="40918" label="ENSMUSG00000040127" cy:nodeId="1961">
    <graphics z="0.0" y="111.0679931640625" x="43.289276123046875">
      <att name="lockedVisualProperties" type="list" cy:type="List">
        <att name="NODE_LABEL" value="" type="string" cy:type="String"/>
      </att>
    </graphics>
  </node>
  <node id="40919" label="ENSMUSG00000071537" cy:nodeId="938">
    <graphics z="0.0" y="123.10940551757812" x="120.49423217773438">
      <att name="lockedVisualProperties" type="list" cy:type="List">
        <att name="NODE_LABEL" value="" type="string" cy:type="String"/>
      </att>
    </graphics>
  </node>
  <node id="40920" label="ENSMUSG00000071847" cy:nodeId="940">
    <graphics z="0.0" y="489.01727294921875" x="-72.02049255371094">
      <att name="lockedVisualProperties" type="list" cy:type="List">
        <att name="NODE_LABEL" value="" type="string" cy:type="String"/>
      </att>
    </graphics>
  </node>
  <node id="40921" label="ENSMUSG00000072115" cy:nodeId="941">
    <graphics z="0.0" y="466.8681945800781" x="393.6522216796875">
      <att name="lockedVisualProperties" type="list" cy:type="List">
        <att name="NODE_LABEL" value="" type="string" cy:type="String"/>
      </att>
    </graphics>
  </node>
  <node id="40922" label="ENSMUSG00000040345" cy:nodeId="1968">
    <graphics z="0.0" y="304.631591796875" x="-9.777976989746094">
      <att name="lockedVisualProperties" type="list" cy:type="List">
        <att name="NODE_LABEL" value="" type="string" cy:type="String"/>
      </att>
    </graphics>
  </node>
  <node id="40923" label="ENSMUSG00000072946" cy:nodeId="945">
    <graphics z="0.0" y="290.18414306640625" x="-24.789608001708984">
      <att name="lockedVisualProperties" type="list" cy:type="List">
        <att name="NODE_LABEL" value="" type="string" cy:type="String"/>
      </att>
    </graphics>
  </node>
  <node id="40924" label="ENSMUSG00000072949" cy:nodeId="946">
    <graphics z="0.0" y="213.10202026367188" x="540.3977661132812">
      <att name="lockedVisualProperties" type="list" cy:type="List">
        <att name="NODE_LABEL" value="" type="string" cy:type="String"/>
      </att>
    </graphics>
  </node>
  <node id="40925" label="ENSMUSG00000040605" cy:nodeId="1973">
    <graphics z="0.0" y="74.60208129882812" x="264.8180236816406">
      <att name="lockedVisualProperties" type="list" cy:type="List">
        <att name="NODE_LABEL" value="" type="string" cy:type="String"/>
      </att>
    </graphics>
  </node>
  <node id="40926" label="ENSMUSG00000074183" cy:nodeId="950">
    <graphics z="0.0" y="-2.561481475830078" x="231.11553955078125">
      <att name="lockedVisualProperties" type="list" cy:type="List">
        <att name="NODE_LABEL" value="" type="string" cy:type="String"/>
      </att>
    </graphics>
  </node>
  <node id="40927" label="ENSMUSG00000074282" cy:nodeId="951">
    <graphics z="0.0" y="30.006214141845703" x="384.5105285644531">
      <att name="lockedVisualProperties" type="list" cy:type="List">
        <att name="NODE_LABEL" value="" type="string" cy:type="String"/>
      </att>
    </graphics>
  </node>
  <node id="40928" label="ENSMUSG00000040640" cy:nodeId="1975">
    <graphics z="0.0" y="390.7691345214844" x="-32.57633972167969">
      <att name="lockedVisualProperties" type="list" cy:type="List">
        <att name="NODE_LABEL" value="" type="string" cy:type="String"/>
      </att>
    </graphics>
  </node>
  <node id="40929" label="ENSMUSG00000074476" cy:nodeId="952">
    <graphics z="0.0" y="491.57720947265625" x="210.46670532226562">
      <att name="lockedVisualProperties" type="list" cy:type="List">
        <att name="NODE_LABEL" value="" type="string" cy:type="String"/>
      </att>
    </graphics>
  </node>
  <node id="40930" label="ENSMUSG00000040998" cy:nodeId="1982">
    <graphics z="0.0" y="572.1831665039062" x="99.22659301757812">
      <att name="lockedVisualProperties" type="list" cy:type="List">
        <att name="NODE_LABEL" value="" type="string" cy:type="String"/>
      </att>
    </graphics>
  </node>
  <node id="40931" label="ENSMUSG00000078650" cy:nodeId="959">
    <graphics z="0.0" y="438.4796142578125" x="311.2864074707031">
      <att name="lockedVisualProperties" type="list" cy:type="List">
        <att name="NODE_LABEL" value="" type="string" cy:type="String"/>
      </att>
    </graphics>
  </node>
  <node id="40932" label="ENSMUSG00000078954" cy:nodeId="962">
    <graphics z="0.0" y="283.66748046875" x="-56.6865234375">
      <att name="lockedVisualProperties" type="list" cy:type="List">
        <att name="NODE_LABEL" value="" type="string" cy:type="String"/>
      </att>
    </graphics>
  </node>
  <node id="40933" label="ENSMUSG00000041202" cy:nodeId="1987">
    <graphics z="0.0" y="102.98004913330078" x="306.87744140625">
      <att name="lockedVisualProperties" type="list" cy:type="List">
        <att name="NODE_LABEL" value="" type="string" cy:type="String"/>
      </att>
    </graphics>
  </node>
  <node id="40934" label="ENSMUSG00000081769" cy:nodeId="967">
    <graphics z="0.0" y="363.99505615234375" x="-16.92318344116211">
      <att name="lockedVisualProperties" type="list" cy:type="List">
        <att name="NODE_LABEL" value="" type="string" cy:type="String"/>
      </att>
    </graphics>
  </node>
  <node id="40935" label="ENSMUSG00000091387" cy:nodeId="971">
    <graphics z="0.0" y="268.7046813964844" x="402.74810791015625">
      <att name="lockedVisualProperties" type="list" cy:type="List">
        <att name="NODE_LABEL" value="" type="string" cy:type="String"/>
      </att>
    </graphics>
  </node>
  <node id="40936" label="ENSMUSG00000094091" cy:nodeId="972">
    <graphics z="0.0" y="404.26611328125" x="92.09896850585938">
      <att name="lockedVisualProperties" type="list" cy:type="List">
        <att name="NODE_LABEL" value="" type="string" cy:type="String"/>
      </att>
    </graphics>
  </node>
  <node id="40937" label="ENSMUSG00000094928" cy:nodeId="974">
    <graphics z="0.0" y="230.38677978515625" x="-85.80825805664062">
      <att name="lockedVisualProperties" type="list" cy:type="List">
        <att name="NODE_LABEL" value="" type="string" cy:type="String"/>
      </att>
    </graphics>
  </node>
  <node id="40938" label="ENSMUSG00000095105" cy:nodeId="976">
    <graphics z="0.0" y="140.3774871826172" x="331.5329895019531">
      <att name="lockedVisualProperties" type="list" cy:type="List">
        <att name="NODE_LABEL" value="" type="string" cy:type="String"/>
      </att>
    </graphics>
  </node>
  <node id="40939" label="ENSMUSG00000096472" cy:nodeId="977">
    <graphics z="0.0" y="518.0010986328125" x="479.6951904296875">
      <att name="lockedVisualProperties" type="list" cy:type="List">
        <att name="NODE_LABEL" value="" type="string" cy:type="String"/>
      </att>
    </graphics>
  </node>
  <node id="40940" label="ENSMUSG00000042179" cy:nodeId="2005">
    <graphics z="0.0" y="634.3955078125" x="345.66748046875">
      <att name="lockedVisualProperties" type="list" cy:type="List">
        <att name="NODE_LABEL" value="" type="string" cy:type="String"/>
      </att>
    </graphics>
  </node>
  <node id="40941" label="ENSMUSG00000042195" cy:nodeId="2006">
    <graphics z="0.0" y="362.6477355957031" x="346.0272216796875">
      <att name="lockedVisualProperties" type="list" cy:type="List">
        <att name="NODE_LABEL" value="" type="string" cy:type="String"/>
      </att>
    </graphics>
  </node>
  <node id="40942" label="ENSMUSG00000108348" cy:nodeId="983">
    <graphics z="0.0" y="219.1886749267578" x="-96.79110717773438">
      <att name="lockedVisualProperties" type="list" cy:type="List">
        <att name="NODE_LABEL" value="" type="string" cy:type="String"/>
      </att>
    </graphics>
  </node>
  <node id="40943" label="ENSMUSG00000110086" cy:nodeId="984">
    <graphics z="0.0" y="580.8458251953125" x="210.83180236816406">
      <att name="lockedVisualProperties" type="list" cy:type="List">
        <att name="NODE_LABEL" value="" type="string" cy:type="String"/>
      </att>
    </graphics>
  </node>
  <node id="40944" label="ENSMUSG00000110266" cy:nodeId="985">
    <graphics z="0.0" y="481.54632568359375" x="508.78790283203125">
      <att name="lockedVisualProperties" type="list" cy:type="List">
        <att name="NODE_LABEL" value="" type="string" cy:type="String"/>
      </att>
    </graphics>
  </node>
  <node id="40945" label="ENSMUSG00000005373" cy:nodeId="991">
    <graphics z="0.0" y="491.8603820800781" x="-65.6298599243164">
      <att name="lockedVisualProperties" type="list" cy:type="List">
        <att name="NODE_LABEL" value="" type="string" cy:type="String"/>
      </att>
    </graphics>
  </node>
  <node id="40946" label="ENSMUSG00000024030" cy:nodeId="993">
    <graphics z="0.0" y="274.08245849609375" x="538.7393798828125">
      <att name="lockedVisualProperties" type="list" cy:type="List">
        <att name="NODE_LABEL" value="" type="string" cy:type="String"/>
      </att>
    </graphics>
  </node>
  <node id="40947" label="ENSMUSG00000042797" cy:nodeId="2020">
    <graphics z="0.0" y="265.5544738769531" x="254.0611572265625">
      <att name="lockedVisualProperties" type="list" cy:type="List">
        <att name="NODE_LABEL" value="" type="string" cy:type="String"/>
      </att>
    </graphics>
  </node>
  <node id="40948" label="ENSMUSG00000004113" cy:nodeId="996">
    <graphics z="0.0" y="338.2817077636719" x="-73.26860046386719">
      <att name="lockedVisualProperties" type="list" cy:type="List">
        <att name="NODE_LABEL" value="" type="string" cy:type="String"/>
      </att>
    </graphics>
  </node>
  <node id="40949" label="ENSMUSG00000006494" cy:nodeId="1001">
    <graphics z="0.0" y="204.03720092773438" x="489.2349853515625">
      <att name="lockedVisualProperties" type="list" cy:type="List">
        <att name="NODE_LABEL" value="" type="string" cy:type="String"/>
      </att>
    </graphics>
  </node>
  <node id="40950" label="ENSMUSG00000014164" cy:nodeId="1003">
    <graphics z="0.0" y="318.9090576171875" x="376.44647216796875">
      <att name="lockedVisualProperties" type="list" cy:type="List">
        <att name="NODE_LABEL" value="" type="string" cy:type="String"/>
      </att>
    </graphics>
  </node>
  <node id="40951" label="ENSMUSG00000017652" cy:nodeId="1004">
    <graphics z="0.0" y="627.9599609375" x="366.69659423828125">
      <att name="lockedVisualProperties" type="list" cy:type="List">
        <att name="NODE_LABEL" value="" type="string" cy:type="String"/>
      </att>
    </graphics>
  </node>
  <node id="40952" label="ENSMUSG00000043391" cy:nodeId="2029">
    <graphics z="0.0" y="118.92872619628906" x="164.34100341796875">
      <att name="lockedVisualProperties" type="list" cy:type="List">
        <att name="NODE_LABEL" value="" type="string" cy:type="String"/>
      </att>
    </graphics>
  </node>
  <node id="40953" label="ENSMUSG00000019796" cy:nodeId="1006">
    <graphics z="0.0" y="88.7413101196289" x="141.97862243652344">
      <att name="lockedVisualProperties" type="list" cy:type="List">
        <att name="NODE_LABEL" value="" type="string" cy:type="String"/>
      </att>
    </graphics>
  </node>
</graph>
