# Supplementary material for: Regulatory network analysis of Paneth cell and goblet cell enriched gut organoids using transcriptomics approaches
Source: Royal Society of Chemistry journal article supplement (doi:10.1039/c9mo00130a), 2019-12-10
Supplement: c9mo00130a1.cys [file c9mo00130a1.cys › CytoscapeSession-2019_09_26-22_01/views/40215-85665-1%3A+Cluster+4+%28Score%3A+4.235%29.xgmml]

<?xml version="1.0" encoding="UTF-8" standalone="yes"?>
<graph id="85665" label="85665" cy:view="1" cy:networkId="40215" cy:visualStyle="default" cy:rendererId="org.cytoscape.ding" cy:documentVersion="3.0" xmlns:dc="http://purl.org/dc/elements/1.1/" xmlns:xlink="http://www.w3.org/1999/xlink" xmlns:rdf="http://www.w3.org/1999/02/22-rdf-syntax-ns#" xmlns:cy="http://www.cytoscape.org" xmlns="http://www.cs.rpi.edu/XGMML">
  <graphics>
    <att name="NETWORK_CENTER_X_LOCATION" value="327.9049301147461" type="string" cy:type="String"/>
    <att name="NETWORK_SCALE_FACTOR" value="1.3797195915115705" type="string" cy:type="String"/>
    <att name="NETWORK_NODE_SELECTION" value="true" type="string" cy:type="String"/>
    <att name="NETWORK_TITLE" value="" type="string" cy:type="String"/>
    <att name="NETWORK_HEIGHT" value="510.0" type="string" cy:type="String"/>
    <att name="NETWORK_CENTER_Z_LOCATION" value="0.0" type="string" cy:type="String"/>
    <att name="NETWORK_EDGE_SELECTION" value="true" type="string" cy:type="String"/>
    <att name="NETWORK_DEPTH" value="0.0" type="string" cy:type="String"/>
    <att name="NETWORK_CENTER_Y_LOCATION" value="110.08565521240234" type="string" cy:type="String"/>
    <att name="NETWORK_WIDTH" value="658.0" type="string" cy:type="String"/>
    <att name="NETWORK_ANNOTATION_SELECTION" value="false" type="string" cy:type="String"/>
  </graphics>
  <node id="85674" label="ENSMUSG00000023050" cy:nodeId="1391">
    <graphics z="0.0" y="5.6643579861665785" x="288.6410245522129">
      <att name="lockedVisualProperties" type="list" cy:type="List">
        <att name="NODE_LABEL_FONT_SIZE" value="6" type="string" cy:type="String"/>
      </att>
    </graphics>
  </node>
  <node id="85675" label="ENSMUSG00000061740" cy:nodeId="2259">
    <graphics z="0.0" y="222.7412430932418" x="313.6740157889981">
      <att name="lockedVisualProperties" type="list" cy:type="List">
        <att name="NODE_LABEL_FONT_SIZE" value="6" type="string" cy:type="String"/>
      </att>
    </graphics>
  </node>
  <node id="85676" label="mmu-miR-19b-3p" cy:nodeId="2805">
    <graphics z="0.0" y="62.13690948486328" x="352.6631164550781">
      <att name="lockedVisualProperties" type="list" cy:type="List">
        <att name="NODE_LABEL_FONT_SIZE" value="5" type="string" cy:type="String"/>
      </att>
    </graphics>
  </node>
  <node id="85677" label="ENSMUSG00000021733" cy:nodeId="1337">
    <graphics z="0.0" y="172.3611699121684" x="436.85699528667465"/>
  </node>
  <node id="85678" label="mmu-miR-30b-5p" cy:nodeId="2841">
    <graphics z="0.0" y="183.37043525757326" x="291.92845295093866">
      <att name="lockedVisualProperties" type="list" cy:type="List">
        <att name="NODE_LABEL_FONT_SIZE" value="5" type="string" cy:type="String"/>
      </att>
    </graphics>
  </node>
  <node id="85679" label="ENSMUSG00000026094" cy:nodeId="1083">
    <graphics z="0.0" y="127.98943518129818" x="438.9998458008049"/>
  </node>
  <node id="85680" label="ENSMUSG00000039607" cy:nodeId="1947">
    <graphics z="0.0" y="125.06516956167252" x="292.20089074317366"/>
  </node>
  <node id="85681" label="ENSMUSG00000023905" cy:nodeId="316">
    <graphics z="0.0" y="20.218192154665303" x="494.44263040155784">
      <att name="lockedVisualProperties" type="list" cy:type="List">
        <att name="NODE_LABEL_FONT_SIZE" value="6" type="string" cy:type="String"/>
      </att>
    </graphics>
  </node>
  <node id="85682" label="mmu-miR-92a-3p" cy:nodeId="2781">
    <graphics z="0.0" y="170.0802459716797" x="176.54225158691406">
      <att name="lockedVisualProperties" type="list" cy:type="List">
        <att name="NODE_LABEL_FONT_SIZE" value="5" type="string" cy:type="String"/>
      </att>
    </graphics>
  </node>
  <node id="85683" label="ENSMUSG00000028403" cy:nodeId="2430">
    <graphics z="0.0" y="256.53838642119445" x="161.36723848435213">
      <att name="lockedVisualProperties" type="list" cy:type="List">
        <att name="NODE_LABEL_FONT_SIZE" value="6" type="string" cy:type="String"/>
      </att>
    </graphics>
  </node>
  <node id="85684" label="ENSMUSG00000034663" cy:nodeId="1823">
    <graphics z="0.0" y="296.0835412450324" x="231.2952288908782"/>
  </node>
  <node id="85667" label="ENSMUSG00000018800" cy:nodeId="1252">
    <graphics z="0.0" y="-75.91221525263609" x="355.8205660242056"/>
  </node>
  <node id="85668" label="ENSMUSG00000057335" cy:nodeId="869">
    <graphics z="0.0" y="91.37603653889892" x="199.82674820174725"/>
  </node>
  <node id="85669" label="ENSMUSG00000008398" cy:nodeId="1125">
    <graphics z="0.0" y="-52.901009578588855" x="432.8228654728664"/>
  </node>
  <node id="85670" label="ENSMUSG00000002107" cy:nodeId="1161">
    <graphics z="0.0" y="24.114266928387224" x="190.3526030669127"/>
  </node>
  <node id="85671" label="ENSMUSG00000039031" cy:nodeId="1929">
    <graphics z="0.0" y="184.46480052994957" x="394.66537861044344">
      <att name="lockedVisualProperties" type="list" cy:type="List">
        <att name="NODE_LABEL_FONT_SIZE" value="6" type="string" cy:type="String"/>
      </att>
    </graphics>
  </node>
  <node id="85672" label="ENSMUSG00000026970" cy:nodeId="1547">
    <graphics z="0.0" y="71.08369735003362" x="260.1556590486034"/>
  </node>
  <node id="85673" label="mmu-miR-19a-3p" cy:nodeId="2766">
    <graphics z="0.0" y="44.921539306640625" x="400.3340148925781">
      <att name="lockedVisualProperties" type="list" cy:type="List">
        <att name="NODE_LABEL_FONT_SIZE" value="5" type="string" cy:type="String"/>
      </att>
    </graphics>
  </node>
</graph>
