# Supplementary material for: Regulatory network analysis of Paneth cell and goblet cell enriched gut organoids using transcriptomics approaches
Source: Royal Society of Chemistry journal article supplement (doi:10.1039/c9mo00130a), 2019-12-10
Supplement: c9mo00130a1.cys [file c9mo00130a1.cys › CytoscapeSession-2019_09_26-22_01/views/40225-86545-1%3A+Cluster+5+%28Score%3A+2.667%29.xgmml]

<?xml version="1.0" encoding="UTF-8" standalone="yes"?>
<graph id="86545" label="86545" cy:view="1" cy:networkId="40225" cy:visualStyle="default" cy:rendererId="org.cytoscape.ding" cy:documentVersion="3.0" xmlns:dc="http://purl.org/dc/elements/1.1/" xmlns:xlink="http://www.w3.org/1999/xlink" xmlns:rdf="http://www.w3.org/1999/02/22-rdf-syntax-ns#" xmlns:cy="http://www.cytoscape.org" xmlns="http://www.cs.rpi.edu/XGMML">
  <graphics>
    <att name="NETWORK_CENTER_X_LOCATION" value="146.85153579711914" type="string" cy:type="String"/>
    <att name="NETWORK_SCALE_FACTOR" value="2.68768337767129" type="string" cy:type="String"/>
    <att name="NETWORK_NODE_SELECTION" value="true" type="string" cy:type="String"/>
    <att name="NETWORK_TITLE" value="" type="string" cy:type="String"/>
    <att name="NETWORK_HEIGHT" value="510.0" type="string" cy:type="String"/>
    <att name="NETWORK_CENTER_Z_LOCATION" value="0.0" type="string" cy:type="String"/>
    <att name="NETWORK_EDGE_SELECTION" value="true" type="string" cy:type="String"/>
    <att name="NETWORK_DEPTH" value="0.0" type="string" cy:type="String"/>
    <att name="NETWORK_CENTER_Y_LOCATION" value="-17.261873245239258" type="string" cy:type="String"/>
    <att name="NETWORK_WIDTH" value="658.0" type="string" cy:type="String"/>
    <att name="NETWORK_ANNOTATION_SELECTION" value="false" type="string" cy:type="String"/>
  </graphics>
  <node id="86550" label="ENSMUSG00000026395" cy:nodeId="1521">
    <graphics z="0.0" y="-13.861105229445457" x="210.1801051606526"/>
  </node>
  <node id="86549" label="mmu-miR-27a-3p" cy:nodeId="2838">
    <graphics z="0.0" y="46.18516129198724" x="143.45686782206576">
      <att name="lockedVisualProperties" type="list" cy:type="List">
        <att name="NODE_LABEL_FONT_SIZE" value="5" type="string" cy:type="String"/>
      </att>
    </graphics>
  </node>
  <node id="86547" label="ENSMUSG00000021175" cy:nodeId="1316">
    <graphics z="0.0" y="-20.635114320763023" x="83.52298752862953"/>
  </node>
  <node id="86548" label="mmu-miR-92b-3p" cy:nodeId="2829">
    <graphics z="0.0" y="-80.70890396778304" x="150.24577005192623">
      <att name="lockedVisualProperties" type="list" cy:type="List">
        <att name="NODE_LABEL_FONT_SIZE" value="5" type="string" cy:type="String"/>
      </att>
    </graphics>
  </node>
</graph>
