# Supplementary material for: Regulatory network analysis of Paneth cell and goblet cell enriched gut organoids using transcriptomics approaches
Source: Royal Society of Chemistry journal article supplement (doi:10.1039/c9mo00130a), 2019-12-10
Supplement: c9mo00130a1.cys [file c9mo00130a1.cys › CytoscapeSession-2019_09_26-22_01/views/40235-83410-1%3A+Cluster+3+%28Score%3A+6.145%29.xgmml]

<?xml version="1.0" encoding="UTF-8" standalone="yes"?>
<graph id="83410" label="83410" cy:view="1" cy:networkId="40235" cy:visualStyle="default" cy:rendererId="org.cytoscape.ding" cy:documentVersion="3.0" xmlns:dc="http://purl.org/dc/elements/1.1/" xmlns:xlink="http://www.w3.org/1999/xlink" xmlns:rdf="http://www.w3.org/1999/02/22-rdf-syntax-ns#" xmlns:cy="http://www.cytoscape.org" xmlns="http://www.cs.rpi.edu/XGMML">
  <graphics>
    <att name="NETWORK_CENTER_X_LOCATION" value="262.1111831665039" type="string" cy:type="String"/>
    <att name="NETWORK_SCALE_FACTOR" value="0.5398806239307733" type="string" cy:type="String"/>
    <att name="NETWORK_NODE_SELECTION" value="true" type="string" cy:type="String"/>
    <att name="NETWORK_TITLE" value="" type="string" cy:type="String"/>
    <att name="NETWORK_HEIGHT" value="510.0" type="string" cy:type="String"/>
    <att name="NETWORK_CENTER_Z_LOCATION" value="0.0" type="string" cy:type="String"/>
    <att name="NETWORK_EDGE_SELECTION" value="true" type="string" cy:type="String"/>
    <att name="NETWORK_DEPTH" value="0.0" type="string" cy:type="String"/>
    <att name="NETWORK_CENTER_Y_LOCATION" value="237.08715057373047" type="string" cy:type="String"/>
    <att name="NETWORK_WIDTH" value="658.0" type="string" cy:type="String"/>
    <att name="NETWORK_ANNOTATION_SELECTION" value="false" type="string" cy:type="String"/>
  </graphics>
  <node id="83941" label="ENSMUSG00000021337" cy:nodeId="1009">
    <graphics z="0.0" y="-37.556419743170025" x="427.09835166547214">
      <att name="lockedVisualProperties" type="list" cy:type="List">
        <att name="NODE_LABEL" value="" type="string" cy:type="String"/>
      </att>
    </graphics>
  </node>
  <node id="83942" label="ENSMUSG00000043885" cy:nodeId="2034">
    <graphics z="0.0" y="113.34268726712075" x="14.423771747605567">
      <att name="lockedVisualProperties" type="list" cy:type="List">
        <att name="NODE_LABEL" value="" type="string" cy:type="String"/>
      </att>
    </graphics>
  </node>
  <node id="83943" label="ENSMUSG00000044017" cy:nodeId="2036">
    <graphics z="0.0" y="534.6971347325383" x="202.06369967373485">
      <att name="lockedVisualProperties" type="list" cy:type="List">
        <att name="NODE_LABEL" value="" type="string" cy:type="String"/>
      </att>
    </graphics>
  </node>
  <node id="83944" label="ENSMUSG00000022687" cy:nodeId="1012">
    <graphics z="0.0" y="-53.13878393984335" x="279.08778054243453">
      <att name="lockedVisualProperties" type="list" cy:type="List">
        <att name="NODE_LABEL" value="" type="string" cy:type="String"/>
      </att>
    </graphics>
  </node>
  <node id="83945" label="ENSMUSG00000044026" cy:nodeId="2037">
    <graphics z="0.0" y="394.6782273669229" x="13.056470650590057">
      <att name="lockedVisualProperties" type="list" cy:type="List">
        <att name="NODE_LABEL" value="" type="string" cy:type="String"/>
      </att>
    </graphics>
  </node>
  <node id="83946" label="ENSMUSG00000044033" cy:nodeId="2038">
    <graphics z="0.0" y="-32.815383742523046" x="552.3017347080029">
      <att name="lockedVisualProperties" type="list" cy:type="List">
        <att name="NODE_LABEL" value="" type="string" cy:type="String"/>
      </att>
    </graphics>
  </node>
  <node id="83947" label="ENSMUSG00000044288" cy:nodeId="2041">
    <graphics z="0.0" y="158.0085644897399" x="86.49797680874765">
      <att name="lockedVisualProperties" type="list" cy:type="List">
        <att name="NODE_LABEL" value="" type="string" cy:type="String"/>
      </att>
    </graphics>
  </node>
  <node id="83948" label="ENSMUSG00000026443" cy:nodeId="1020">
    <graphics z="0.0" y="-126.30149627873116" x="270.7667476750378">
      <att name="lockedVisualProperties" type="list" cy:type="List">
        <att name="NODE_LABEL" value="" type="string" cy:type="String"/>
      </att>
    </graphics>
  </node>
  <node id="83949" label="ENSMUSG00000026692" cy:nodeId="1021">
    <graphics z="0.0" y="-60.87093238432619" x="355.76360882541104">
      <att name="lockedVisualProperties" type="list" cy:type="List">
        <att name="NODE_LABEL" value="" type="string" cy:type="String"/>
      </att>
    </graphics>
  </node>
  <node id="83950" label="ENSMUSG00000027254" cy:nodeId="1024">
    <graphics z="0.0" y="386.6233303093781" x="442.83691971421416">
      <att name="lockedVisualProperties" type="list" cy:type="List">
        <att name="NODE_LABEL" value="" type="string" cy:type="String"/>
      </att>
    </graphics>
  </node>
  <node id="83951" label="ENSMUSG00000044912" cy:nodeId="2050">
    <graphics z="0.0" y="313.74866324284477" x="-145.0024204732463">
      <att name="lockedVisualProperties" type="list" cy:type="List">
        <att name="NODE_LABEL" value="" type="string" cy:type="String"/>
      </att>
    </graphics>
  </node>
  <node id="83952" label="ENSMUSG00000044933" cy:nodeId="2052">
    <graphics z="0.0" y="-26.18517795696981" x="280.5973752065257">
      <att name="lockedVisualProperties" type="list" cy:type="List">
        <att name="NODE_LABEL" value="" type="string" cy:type="String"/>
      </att>
    </graphics>
  </node>
  <node id="83953" label="ENSMUSG00000033061" cy:nodeId="1031">
    <graphics z="0.0" y="274.50990078179024" x="-65.94676421791775">
      <att name="lockedVisualProperties" type="list" cy:type="List">
        <att name="NODE_LABEL" value="" type="string" cy:type="String"/>
      </att>
    </graphics>
  </node>
  <node id="83954" label="ENSMUSG00000033307" cy:nodeId="1032">
    <graphics z="0.0" y="172.80687271813485" x="-64.72310244339806">
      <att name="lockedVisualProperties" type="list" cy:type="List">
        <att name="NODE_LABEL" value="" type="string" cy:type="String"/>
      </att>
    </graphics>
  </node>
  <node id="83955" label="ENSMUSG00000034379" cy:nodeId="1033">
    <graphics z="0.0" y="171.53900501179612" x="204.4970143796313">
      <att name="lockedVisualProperties" type="list" cy:type="List">
        <att name="NODE_LABEL" value="" type="string" cy:type="String"/>
      </att>
    </graphics>
  </node>
  <node id="83956" label="ENSMUSG00000035299" cy:nodeId="1038">
    <graphics z="0.0" y="452.10530395579747" x="338.4440434584074">
      <att name="lockedVisualProperties" type="list" cy:type="List">
        <att name="NODE_LABEL" value="" type="string" cy:type="String"/>
      </att>
    </graphics>
  </node>
  <node id="83957" label="ENSMUSG00000046160" cy:nodeId="2065">
    <graphics z="0.0" y="415.4502358043023" x="123.05813792355279">
      <att name="lockedVisualProperties" type="list" cy:type="List">
        <att name="NODE_LABEL" value="" type="string" cy:type="String"/>
      </att>
    </graphics>
  </node>
  <node id="83958" label="ENSMUSG00000046410" cy:nodeId="2068">
    <graphics z="0.0" y="171.63167765740252" x="-32.46460742993576">
      <att name="lockedVisualProperties" type="list" cy:type="List">
        <att name="NODE_LABEL" value="" type="string" cy:type="String"/>
      </att>
    </graphics>
  </node>
  <node id="83959" label="ENSMUSG00000038255" cy:nodeId="1044">
    <graphics z="0.0" y="183.82446574117532" x="359.36911040593577">
      <att name="lockedVisualProperties" type="list" cy:type="List">
        <att name="NODE_LABEL" value="" type="string" cy:type="String"/>
      </att>
    </graphics>
  </node>
  <node id="83960" label="ENSMUSG00000039005" cy:nodeId="1045">
    <graphics z="0.0" y="348.5412771701765" x="180.68932003022172">
      <att name="lockedVisualProperties" type="list" cy:type="List">
        <att name="NODE_LABEL" value="" type="string" cy:type="String"/>
      </att>
    </graphics>
  </node>
  <node id="83961" label="ENSMUSG00000039372" cy:nodeId="1046">
    <graphics z="0.0" y="-108.99219056880656" x="246.5520325299455">
      <att name="lockedVisualProperties" type="list" cy:type="List">
        <att name="NODE_LABEL" value="" type="string" cy:type="String"/>
      </att>
    </graphics>
  </node>
  <node id="83962" label="ENSMUSG00000046598" cy:nodeId="2072">
    <graphics z="0.0" y="251.07450187872863" x="432.8068441286714">
      <att name="lockedVisualProperties" type="list" cy:type="List">
        <att name="NODE_LABEL" value="" type="string" cy:type="String"/>
      </att>
    </graphics>
  </node>
  <node id="83963" label="ENSMUSG00000046697" cy:nodeId="2076">
    <graphics z="0.0" y="11.172344615841496" x="504.89343512177715">
      <att name="lockedVisualProperties" type="list" cy:type="List">
        <att name="NODE_LABEL" value="" type="string" cy:type="String"/>
      </att>
    </graphics>
  </node>
  <node id="83964" label="ENSMUSG00000045838" cy:nodeId="1053">
    <graphics z="0.0" y="-37.28114344329253" x="26.875788587944236">
      <att name="lockedVisualProperties" type="list" cy:type="List">
        <att name="NODE_LABEL" value="" type="string" cy:type="String"/>
      </att>
    </graphics>
  </node>
  <node id="83965" label="ENSMUSG00000051166" cy:nodeId="1057">
    <graphics z="0.0" y="-69.75671744711113" x="348.8160767012047">
      <att name="lockedVisualProperties" type="list" cy:type="List">
        <att name="NODE_LABEL" value="" type="string" cy:type="String"/>
      </att>
    </graphics>
  </node>
  <node id="83412" label="ENSMUSG00000058624" cy:nodeId="1061">
    <graphics z="0.0" y="29.94370446801872" x="187.7949897722075">
      <att name="lockedVisualProperties" type="list" cy:type="List">
        <att name="NODE_LABEL" value="" type="string" cy:type="String"/>
      </att>
    </graphics>
  </node>
  <node id="83413" label="ENSMUSG00000047728" cy:nodeId="2090">
    <graphics z="0.0" y="367.87147365154743" x="-131.87947451777399">
      <att name="lockedVisualProperties" type="list" cy:type="List">
        <att name="NODE_LABEL" value="" type="string" cy:type="String"/>
      </att>
    </graphics>
  </node>
  <node id="83414" label="ENSMUSG00000047730" cy:nodeId="2091">
    <graphics z="0.0" y="57.29632167477568" x="-2.0638217945903676">
      <att name="lockedVisualProperties" type="list" cy:type="List">
        <att name="NODE_LABEL" value="" type="string" cy:type="String"/>
      </att>
    </graphics>
  </node>
  <node id="83415" label="ENSMUSG00000047810" cy:nodeId="2094">
    <graphics z="0.0" y="102.47000536085532" x="527.7586357690528">
      <att name="lockedVisualProperties" type="list" cy:type="List">
        <att name="NODE_LABEL" value="" type="string" cy:type="String"/>
      </att>
    </graphics>
  </node>
  <node id="83416" label="ENSMUSG00000047842" cy:nodeId="2095">
    <graphics z="0.0" y="387.42580221865" x="532.7896339442123">
      <att name="lockedVisualProperties" type="list" cy:type="List">
        <att name="NODE_LABEL" value="" type="string" cy:type="String"/>
      </att>
    </graphics>
  </node>
  <node id="83417" label="ENSMUSG00000047875" cy:nodeId="2098">
    <graphics z="0.0" y="147.75351129995545" x="550.3384122099943">
      <att name="lockedVisualProperties" type="list" cy:type="List">
        <att name="NODE_LABEL" value="" type="string" cy:type="String"/>
      </att>
    </graphics>
  </node>
  <node id="83418" label="ENSMUSG00000004151" cy:nodeId="1074">
    <graphics z="0.0" y="302.52973973659107" x="29.3487715035977">
      <att name="lockedVisualProperties" type="list" cy:type="List">
        <att name="NODE_LABEL" value="" type="string" cy:type="String"/>
      </att>
    </graphics>
  </node>
  <node id="83419" label="ENSMUSG00000048022" cy:nodeId="2101">
    <graphics z="0.0" y="84.84489223342834" x="459.01052676627023">
      <att name="lockedVisualProperties" type="list" cy:type="List">
        <att name="NODE_LABEL" value="" type="string" cy:type="String"/>
      </att>
    </graphics>
  </node>
  <node id="83420" label="ENSMUSG00000048078" cy:nodeId="2103">
    <graphics z="0.0" y="72.39279793248083" x="347.68402979640206">
      <att name="lockedVisualProperties" type="list" cy:type="List">
        <att name="NODE_LABEL" value="" type="string" cy:type="String"/>
      </att>
    </graphics>
  </node>
  <node id="83421" label="ENSMUSG00000048148" cy:nodeId="2104">
    <graphics z="0.0" y="139.09967236867323" x="657.2390155301326">
      <att name="lockedVisualProperties" type="list" cy:type="List">
        <att name="NODE_LABEL" value="" type="string" cy:type="String"/>
      </att>
    </graphics>
  </node>
  <node id="83422" label="ENSMUSG00000021720" cy:nodeId="1081">
    <graphics z="0.0" y="444.4094085553112" x="106.83631330037485">
      <att name="lockedVisualProperties" type="list" cy:type="List">
        <att name="NODE_LABEL" value="" type="string" cy:type="String"/>
      </att>
    </graphics>
  </node>
  <node id="83423" label="ENSMUSG00000023832" cy:nodeId="1082">
    <graphics z="0.0" y="211.93597084441038" x="313.897668026987">
      <att name="lockedVisualProperties" type="list" cy:type="List">
        <att name="NODE_LABEL" value="" type="string" cy:type="String"/>
      </att>
    </graphics>
  </node>
  <node id="83424" label="ENSMUSG00000026548" cy:nodeId="1084">
    <graphics z="0.0" y="-119.07183242174779" x="270.0600333980883">
      <att name="lockedVisualProperties" type="list" cy:type="List">
        <att name="NODE_LABEL" value="" type="string" cy:type="String"/>
      </att>
    </graphics>
  </node>
  <node id="83425" label="ENSMUSG00000048373" cy:nodeId="2109">
    <graphics z="0.0" y="-33.32934579796679" x="100.77699960832956">
      <att name="lockedVisualProperties" type="list" cy:type="List">
        <att name="NODE_LABEL" value="" type="string" cy:type="String"/>
      </att>
    </graphics>
  </node>
  <node id="83426" label="ENSMUSG00000026786" cy:nodeId="1085">
    <graphics z="0.0" y="144.43271948021487" x="227.49311089605598">
      <att name="lockedVisualProperties" type="list" cy:type="List">
        <att name="NODE_LABEL" value="" type="string" cy:type="String"/>
      </att>
    </graphics>
  </node>
  <node id="83427" label="ENSMUSG00000031584" cy:nodeId="1089">
    <graphics z="0.0" y="32.88015598055566" x="155.96209436648425">
      <att name="lockedVisualProperties" type="list" cy:type="List">
        <att name="NODE_LABEL" value="" type="string" cy:type="String"/>
      </att>
    </graphics>
  </node>
  <node id="83428" label="ENSMUSG00000034593" cy:nodeId="1091">
    <graphics z="0.0" y="307.0396735649761" x="49.77315103849255">
      <att name="lockedVisualProperties" type="list" cy:type="List">
        <att name="NODE_LABEL" value="" type="string" cy:type="String"/>
      </att>
    </graphics>
  </node>
  <node id="83429" label="ENSMUSG00000039958" cy:nodeId="1095">
    <graphics z="0.0" y="392.68812805927996" x="168.16663163671788">
      <att name="lockedVisualProperties" type="list" cy:type="List">
        <att name="NODE_LABEL" value="" type="string" cy:type="String"/>
      </att>
    </graphics>
  </node>
  <node id="83430" label="ENSMUSG00000040136" cy:nodeId="1096">
    <graphics z="0.0" y="-145.8675964762911" x="353.4575033872747">
      <att name="lockedVisualProperties" type="list" cy:type="List">
        <att name="NODE_LABEL" value="" type="string" cy:type="String"/>
      </att>
    </graphics>
  </node>
  <node id="83431" label="ENSMUSG00000042631" cy:nodeId="1098">
    <graphics z="0.0" y="430.0333497759982" x="556.9168982642747">
      <att name="lockedVisualProperties" type="list" cy:type="List">
        <att name="NODE_LABEL" value="" type="string" cy:type="String"/>
      </att>
    </graphics>
  </node>
  <node id="83433" label="ENSMUSG00000021779" cy:nodeId="75">
    <graphics z="0.0" y="-15.49990164586815" x="152.5049490716848">
      <att name="lockedVisualProperties" type="list" cy:type="List">
        <att name="NODE_LABEL" value="" type="string" cy:type="String"/>
      </att>
    </graphics>
  </node>
  <node id="83432" label="ENSMUSG00000049436" cy:nodeId="2123">
    <graphics z="0.0" y="239.61758709443916" x="-49.679382184080126">
      <att name="lockedVisualProperties" type="list" cy:type="List">
        <att name="NODE_LABEL" value="" type="string" cy:type="String"/>
      </att>
    </graphics>
  </node>
  <node id="83434" label="ENSMUSG00000049313" cy:nodeId="1101">
    <graphics z="0.0" y="135.91564952015435" x="499.67297675539845">
      <att name="lockedVisualProperties" type="list" cy:type="List">
        <att name="NODE_LABEL" value="" type="string" cy:type="String"/>
      </att>
    </graphics>
  </node>
  <node id="83435" label="ENSMUSG00000022809" cy:nodeId="78">
    <graphics z="0.0" y="182.15714278740447" x="78.2713184213864">
      <att name="lockedVisualProperties" type="list" cy:type="List">
        <att name="NODE_LABEL" value="" type="string" cy:type="String"/>
      </att>
    </graphics>
  </node>
  <node id="83436" label="ENSMUSG00000058756" cy:nodeId="80">
    <graphics z="0.0" y="5.616415089218663" x="530.8159776338346">
      <att name="lockedVisualProperties" type="list" cy:type="List">
        <att name="NODE_LABEL" value="" type="string" cy:type="String"/>
      </att>
    </graphics>
  </node>
  <node id="83437" label="ENSMUSG00000049892" cy:nodeId="2129">
    <graphics z="0.0" y="459.02329930355484" x="420.20716711603654">
      <att name="lockedVisualProperties" type="list" cy:type="List">
        <att name="NODE_LABEL" value="" type="string" cy:type="String"/>
      </att>
    </graphics>
  </node>
  <node id="83438" label="ENSMUSG00000055978" cy:nodeId="1105">
    <graphics z="0.0" y="294.2420960511965" x="234.34666733341655">
      <att name="lockedVisualProperties" type="list" cy:type="List">
        <att name="NODE_LABEL" value="" type="string" cy:type="String"/>
      </att>
    </graphics>
  </node>
  <node id="83439" label="ENSMUSG00000060002" cy:nodeId="1107">
    <graphics z="0.0" y="251.07864731965304" x="217.51929146874653">
      <att name="lockedVisualProperties" type="list" cy:type="List">
        <att name="NODE_LABEL" value="" type="string" cy:type="String"/>
      </att>
    </graphics>
  </node>
  <node id="83440" label="ENSMUSG00000072235" cy:nodeId="1108">
    <graphics z="0.0" y="155.6625886948657" x="39.51228726384525">
      <att name="lockedVisualProperties" type="list" cy:type="List">
        <att name="NODE_LABEL" value="" type="string" cy:type="String"/>
      </att>
    </graphics>
  </node>
  <node id="83441" label="ENSMUSG00000020660" cy:nodeId="1110">
    <graphics z="0.0" y="20.96975630889191" x="666.7763886521726">
      <att name="lockedVisualProperties" type="list" cy:type="List">
        <att name="NODE_LABEL" value="" type="string" cy:type="String"/>
      </att>
    </graphics>
  </node>
  <node id="83442" label="ENSMUSG00000052684" cy:nodeId="90">
    <graphics z="0.0" y="206.3280281527663" x="252.86956113137464">
      <att name="lockedVisualProperties" type="list" cy:type="List">
        <att name="NODE_LABEL" value="" type="string" cy:type="String"/>
      </att>
    </graphics>
  </node>
  <node id="83443" label="ENSMUSG00000042010" cy:nodeId="1115">
    <graphics z="0.0" y="74.59114817023263" x="-12.297055517962711">
      <att name="lockedVisualProperties" type="list" cy:type="List">
        <att name="NODE_LABEL" value="" type="string" cy:type="String"/>
      </att>
    </graphics>
  </node>
  <node id="83444" label="ENSMUSG00000015568" cy:nodeId="91">
    <graphics z="0.0" y="11.599504609025026" x="612.4553429038866">
      <att name="lockedVisualProperties" type="list" cy:type="List">
        <att name="NODE_LABEL" value="" type="string" cy:type="String"/>
      </att>
    </graphics>
  </node>
  <node id="83445" label="ENSMUSG00000050751" cy:nodeId="2140">
    <graphics z="0.0" y="1.0553411482053274" x="474.8803216248651">
      <att name="lockedVisualProperties" type="list" cy:type="List">
        <att name="NODE_LABEL" value="" type="string" cy:type="String"/>
      </att>
    </graphics>
  </node>
  <node id="83446" label="ENSMUSG00000050824" cy:nodeId="2142">
    <graphics z="0.0" y="188.40017031032602" x="500.15663317399253">
      <att name="lockedVisualProperties" type="list" cy:type="List">
        <att name="NODE_LABEL" value="" type="string" cy:type="String"/>
      </att>
    </graphics>
  </node>
  <node id="83447" label="ENSMUSG00000029287" cy:nodeId="1119">
    <graphics z="0.0" y="59.28973142004416" x="355.72606985288877">
      <att name="lockedVisualProperties" type="list" cy:type="List">
        <att name="NODE_LABEL" value="" type="string" cy:type="String"/>
      </att>
    </graphics>
  </node>
  <node id="83448" label="ENSMUSG00000056035" cy:nodeId="1123">
    <graphics z="0.0" y="247.69783786873194" x="-152.87815002227507">
      <att name="lockedVisualProperties" type="list" cy:type="List">
        <att name="NODE_LABEL" value="" type="string" cy:type="String"/>
      </att>
    </graphics>
  </node>
  <node id="83449" label="ENSMUSG00000051483" cy:nodeId="2150">
    <graphics z="0.0" y="363.7948700602767" x="529.0554373948135">
      <att name="lockedVisualProperties" type="list" cy:type="List">
        <att name="NODE_LABEL" value="" type="string" cy:type="String"/>
      </att>
    </graphics>
  </node>
  <node id="83450" label="ENSMUSG00000000253" cy:nodeId="1131">
    <graphics z="0.0" y="231.2309883569183" x="-167.1887547225061">
      <att name="lockedVisualProperties" type="list" cy:type="List">
        <att name="NODE_LABEL" value="" type="string" cy:type="String"/>
      </att>
    </graphics>
  </node>
  <node id="83451" label="ENSMUSG00000051726" cy:nodeId="2157">
    <graphics z="0.0" y="146.26877460593676" x="575.2287697798388">
      <att name="lockedVisualProperties" type="list" cy:type="List">
        <att name="NODE_LABEL" value="" type="string" cy:type="String"/>
      </att>
    </graphics>
  </node>
  <node id="83452" label="ENSMUSG00000053007" cy:nodeId="111">
    <graphics z="0.0" y="366.6286319611621" x="491.3324645407825">
      <att name="lockedVisualProperties" type="list" cy:type="List">
        <att name="NODE_LABEL" value="" type="string" cy:type="String"/>
      </att>
    </graphics>
  </node>
  <node id="83453" label="ENSMUSG00000000567" cy:nodeId="113">
    <graphics z="0.0" y="278.2296282278035" x="278.17871414044794">
      <att name="lockedVisualProperties" type="list" cy:type="List">
        <att name="NODE_LABEL" value="" type="string" cy:type="String"/>
      </att>
    </graphics>
  </node>
  <node id="83454" label="ENSMUSG00000052396" cy:nodeId="2163">
    <graphics z="0.0" y="-36.49956047946229" x="147.32281768102087">
      <att name="lockedVisualProperties" type="list" cy:type="List">
        <att name="NODE_LABEL" value="" type="string" cy:type="String"/>
      </att>
    </graphics>
  </node>
  <node id="83455" label="ENSMUSG00000000214" cy:nodeId="116">
    <graphics z="0.0" y="297.10328831201525" x="-17.171595404901552">
      <att name="lockedVisualProperties" type="list" cy:type="List">
        <att name="NODE_LABEL" value="" type="string" cy:type="String"/>
      </att>
    </graphics>
  </node>
  <node id="83456" label="ENSMUSG00000001023" cy:nodeId="1142">
    <graphics z="0.0" y="-23.608853636154016" x="27.553141479687454">
      <att name="lockedVisualProperties" type="list" cy:type="List">
        <att name="NODE_LABEL" value="" type="string" cy:type="String"/>
      </att>
    </graphics>
  </node>
  <node id="83457" label="ENSMUSG00000052609" cy:nodeId="2166">
    <graphics z="0.0" y="-64.64589940036471" x="179.85905591863047">
      <att name="lockedVisualProperties" type="list" cy:type="List">
        <att name="NODE_LABEL" value="" type="string" cy:type="String"/>
      </att>
    </graphics>
  </node>
  <node id="83458" label="ENSMUSG00000000394" cy:nodeId="118">
    <graphics z="0.0" y="-96.90440403831094" x="134.03057979465243">
      <att name="lockedVisualProperties" type="list" cy:type="List">
        <att name="NODE_LABEL" value="" type="string" cy:type="String"/>
      </att>
    </graphics>
  </node>
  <node id="83459" label="ENSMUSG00000001095" cy:nodeId="1144">
    <graphics z="0.0" y="171.9107835031453" x="-67.3973131314729">
      <att name="lockedVisualProperties" type="list" cy:type="List">
        <att name="NODE_LABEL" value="" type="string" cy:type="String"/>
      </att>
    </graphics>
  </node>
  <node id="83460" label="ENSMUSG00000001225" cy:nodeId="1145">
    <graphics z="0.0" y="377.94385316995687" x="121.75797629939811">
      <att name="lockedVisualProperties" type="list" cy:type="List">
        <att name="NODE_LABEL" value="" type="string" cy:type="String"/>
      </att>
    </graphics>
  </node>
  <node id="83461" label="ENSMUSG00000001120" cy:nodeId="122">
    <graphics z="0.0" y="179.61893578075956" x="519.9000387850888">
      <att name="lockedVisualProperties" type="list" cy:type="List">
        <att name="NODE_LABEL" value="" type="string" cy:type="String"/>
      </att>
    </graphics>
  </node>
  <node id="83462" label="ENSMUSG00000001281" cy:nodeId="123">
    <graphics z="0.0" y="53.10533666866051" x="278.0944506273236">
      <att name="lockedVisualProperties" type="list" cy:type="List">
        <att name="NODE_LABEL" value="" type="string" cy:type="String"/>
      </att>
    </graphics>
  </node>
  <node id="83463" label="ENSMUSG00000053279" cy:nodeId="2172">
    <graphics z="0.0" y="-45.568026614650265" x="390.2849786116834">
      <att name="lockedVisualProperties" type="list" cy:type="List">
        <att name="NODE_LABEL" value="" type="string" cy:type="String"/>
      </att>
    </graphics>
  </node>
  <node id="83464" label="ENSMUSG00000001761" cy:nodeId="126">
    <graphics z="0.0" y="498.4081768622767" x="299.9391734213887">
      <att name="lockedVisualProperties" type="list" cy:type="List">
        <att name="NODE_LABEL" value="" type="string" cy:type="String"/>
      </att>
    </graphics>
  </node>
  <node id="83465" label="ENSMUSG00000001864" cy:nodeId="127">
    <graphics z="0.0" y="-57.20496198204451" x="303.6174580870404">
      <att name="lockedVisualProperties" type="list" cy:type="List">
        <att name="NODE_LABEL" value="" type="string" cy:type="String"/>
      </att>
    </graphics>
  </node>
  <node id="83466" label="ENSMUSG00000002565" cy:nodeId="128">
    <graphics z="0.0" y="541.205159896069" x="114.08264731707737">
      <att name="lockedVisualProperties" type="list" cy:type="List">
        <att name="NODE_LABEL" value="" type="string" cy:type="String"/>
      </att>
    </graphics>
  </node>
  <node id="83467" label="ENSMUSG00000003380" cy:nodeId="132">
    <graphics z="0.0" y="461.8097045574176" x="422.8843311353814">
      <att name="lockedVisualProperties" type="list" cy:type="List">
        <att name="NODE_LABEL" value="" type="string" cy:type="String"/>
      </att>
    </graphics>
  </node>
  <node id="83468" label="ENSMUSG00000001819" cy:nodeId="1156">
    <graphics z="0.0" y="-30.59126956489282" x="444.50591642885524">
      <att name="lockedVisualProperties" type="list" cy:type="List">
        <att name="NODE_LABEL" value="" type="string" cy:type="String"/>
      </att>
    </graphics>
  </node>
  <node id="83469" label="ENSMUSG00000001901" cy:nodeId="1157">
    <graphics z="0.0" y="329.18307888647126" x="-119.86688659474464">
      <att name="lockedVisualProperties" type="list" cy:type="List">
        <att name="NODE_LABEL" value="" type="string" cy:type="String"/>
      </att>
    </graphics>
  </node>
  <node id="83470" label="ENSMUSG00000054469" cy:nodeId="2185">
    <graphics z="0.0" y="209.8893286840022" x="572.5133299967213">
      <att name="lockedVisualProperties" type="list" cy:type="List">
        <att name="NODE_LABEL" value="" type="string" cy:type="String"/>
      </att>
    </graphics>
  </node>
  <node id="83471" label="ENSMUSG00000003949" cy:nodeId="137">
    <graphics z="0.0" y="198.38720306566455" x="347.07877917090417">
      <att name="lockedVisualProperties" type="list" cy:type="List">
        <att name="NODE_LABEL" value="" type="string" cy:type="String"/>
      </att>
    </graphics>
  </node>
  <node id="83472" label="ENSMUSG00000054598" cy:nodeId="2186">
    <graphics z="0.0" y="25.94592499541993" x="373.3095721494347">
      <att name="lockedVisualProperties" type="list" cy:type="List">
        <att name="NODE_LABEL" value="" type="string" cy:type="String"/>
      </att>
    </graphics>
  </node>
  <node id="83473" label="ENSMUSG00000004768" cy:nodeId="141">
    <graphics z="0.0" y="71.20785130424022" x="439.84347822763016">
      <att name="lockedVisualProperties" type="list" cy:type="List">
        <att name="NODE_LABEL" value="" type="string" cy:type="String"/>
      </att>
    </graphics>
  </node>
  <node id="83474" label="ENSMUSG00000003352" cy:nodeId="1170">
    <graphics z="0.0" y="292.10190873947215" x="183.1103494619713">
      <att name="lockedVisualProperties" type="list" cy:type="List">
        <att name="NODE_LABEL" value="" type="string" cy:type="String"/>
      </att>
    </graphics>
  </node>
  <node id="83475" label="ENSMUSG00000005360" cy:nodeId="147">
    <graphics z="0.0" y="115.49360545712234" x="332.1037966769391">
      <att name="lockedVisualProperties" type="list" cy:type="List">
        <att name="NODE_LABEL" value="" type="string" cy:type="String"/>
      </att>
    </graphics>
  </node>
  <node id="83476" label="ENSMUSG00000003436" cy:nodeId="1173">
    <graphics z="0.0" y="128.10932283312013" x="648.5930088825489">
      <att name="lockedVisualProperties" type="list" cy:type="List">
        <att name="NODE_LABEL" value="" type="string" cy:type="String"/>
      </att>
    </graphics>
  </node>
  <node id="83477" label="ENSMUSG00000055485" cy:nodeId="2198">
    <graphics z="0.0" y="189.63357349749637" x="545.8983729809955">
      <att name="lockedVisualProperties" type="list" cy:type="List">
        <att name="NODE_LABEL" value="" type="string" cy:type="String"/>
      </att>
    </graphics>
  </node>
  <node id="83478" label="ENSMUSG00000005958" cy:nodeId="151">
    <graphics z="0.0" y="176.88059677703137" x="172.92379282462156">
      <att name="lockedVisualProperties" type="list" cy:type="List">
        <att name="NODE_LABEL" value="" type="string" cy:type="String"/>
      </att>
    </graphics>
  </node>
  <node id="83479" label="ENSMUSG00000005973" cy:nodeId="152">
    <graphics z="0.0" y="395.8987076323856" x="194.96335355502674">
      <att name="lockedVisualProperties" type="list" cy:type="List">
        <att name="NODE_LABEL" value="" type="string" cy:type="String"/>
      </att>
    </graphics>
  </node>
  <node id="83481" label="ENSMUSG00000055567" cy:nodeId="2201">
    <graphics z="0.0" y="164.31454554077533" x="703.6225151198696">
      <att name="lockedVisualProperties" type="list" cy:type="List">
        <att name="NODE_LABEL" value="" type="string" cy:type="String"/>
      </att>
    </graphics>
  </node>
  <node id="83480" label="ENSMUSG00000005986" cy:nodeId="153">
    <graphics z="0.0" y="355.3930901569719" x="8.76172441320108">
      <att name="lockedVisualProperties" type="list" cy:type="List">
        <att name="NODE_LABEL" value="" type="string" cy:type="String"/>
      </att>
    </graphics>
  </node>
  <node id="83482" label="ENSMUSG00000006345" cy:nodeId="154">
    <graphics z="0.0" y="526.6584186874007" x="231.50139108078858">
      <att name="lockedVisualProperties" type="list" cy:type="List">
        <att name="NODE_LABEL" value="" type="string" cy:type="String"/>
      </att>
    </graphics>
  </node>
  <node id="83483" label="ENSMUSG00000006435" cy:nodeId="155">
    <graphics z="0.0" y="310.0507428803335" x="111.946692129842">
      <att name="lockedVisualProperties" type="list" cy:type="List">
        <att name="NODE_LABEL" value="" type="string" cy:type="String"/>
      </att>
    </graphics>
  </node>
  <node id="83484" label="ENSMUSG00000004558" cy:nodeId="1179">
    <graphics z="0.0" y="0.42068104429843345" x="-5.955803237346714">
      <att name="lockedVisualProperties" type="list" cy:type="List">
        <att name="NODE_LABEL" value="" type="string" cy:type="String"/>
      </att>
    </graphics>
  </node>
  <node id="83485" label="ENSMUSG00000055730" cy:nodeId="2204">
    <graphics z="0.0" y="343.49433868800764" x="313.5857207646211">
      <att name="lockedVisualProperties" type="list" cy:type="List">
        <att name="NODE_LABEL" value="" type="string" cy:type="String"/>
      </att>
    </graphics>
  </node>
  <node id="83486" label="ENSMUSG00000005267" cy:nodeId="1184">
    <graphics z="0.0" y="-69.1485995409816" x="88.49402826807378">
      <att name="lockedVisualProperties" type="list" cy:type="List">
        <att name="NODE_LABEL" value="" type="string" cy:type="String"/>
      </att>
    </graphics>
  </node>
  <node id="83487" label="ENSMUSG00000007989" cy:nodeId="162">
    <graphics z="0.0" y="400.30869408615456" x="489.7405266773301">
      <att name="lockedVisualProperties" type="list" cy:type="List">
        <att name="NODE_LABEL" value="" type="string" cy:type="String"/>
      </att>
    </graphics>
  </node>
  <node id="83488" label="ENSMUSG00000008090" cy:nodeId="163">
    <graphics z="0.0" y="466.842721944257" x="534.9911337631872">
      <att name="lockedVisualProperties" type="list" cy:type="List">
        <att name="NODE_LABEL" value="" type="string" cy:type="String"/>
      </att>
    </graphics>
  </node>
  <node id="83489" label="ENSMUSG00000008734" cy:nodeId="164">
    <graphics z="0.0" y="192.0864994829114" x="577.2840646820819">
      <att name="lockedVisualProperties" type="list" cy:type="List">
        <att name="NODE_LABEL" value="" type="string" cy:type="String"/>
      </att>
    </graphics>
  </node>
  <node id="83491" label="ENSMUSG00000009863" cy:nodeId="166">
    <graphics z="0.0" y="62.84188240279115" x="491.0128747301012">
      <att name="lockedVisualProperties" type="list" cy:type="List">
        <att name="NODE_LABEL" value="" type="string" cy:type="String"/>
      </att>
    </graphics>
  </node>
  <node id="83490" label="ENSMUSG00000056671" cy:nodeId="2214">
    <graphics z="0.0" y="500.2019606826972" x="400.5146935201354">
      <att name="lockedVisualProperties" type="list" cy:type="List">
        <att name="NODE_LABEL" value="" type="string" cy:type="String"/>
      </att>
    </graphics>
  </node>
  <node id="83492" label="ENSMUSG00000006369" cy:nodeId="1191">
    <graphics z="0.0" y="281.7352682345572" x="532.8890722375196">
      <att name="lockedVisualProperties" type="list" cy:type="List">
        <att name="NODE_LABEL" value="" type="string" cy:type="String"/>
      </att>
    </graphics>
  </node>
  <node id="83493" label="ENSMUSG00000010830" cy:nodeId="168">
    <graphics z="0.0" y="158.80758933802514" x="548.3490676853125">
      <att name="lockedVisualProperties" type="list" cy:type="List">
        <att name="NODE_LABEL" value="" type="string" cy:type="String"/>
      </att>
    </graphics>
  </node>
  <node id="83494" label="ENSMUSG00000006575" cy:nodeId="1195">
    <graphics z="0.0" y="-56.0183982617315" x="394.0617989932739">
      <att name="lockedVisualProperties" type="list" cy:type="List">
        <att name="NODE_LABEL" value="" type="string" cy:type="String"/>
      </att>
    </graphics>
  </node>
  <node id="83495" label="ENSMUSG00000006777" cy:nodeId="1198">
    <graphics z="0.0" y="-107.51694173478008" x="254.76124864266146">
      <att name="lockedVisualProperties" type="list" cy:type="List">
        <att name="NODE_LABEL" value="" type="string" cy:type="String"/>
      </att>
    </graphics>
  </node>
  <node id="83497" label="ENSMUSG00000008461" cy:nodeId="1202">
    <graphics z="0.0" y="-31.94892306067411" x="471.53460230806894">
      <att name="lockedVisualProperties" type="list" cy:type="List">
        <att name="NODE_LABEL" value="" type="string" cy:type="String"/>
      </att>
    </graphics>
  </node>
  <node id="83496" label="ENSMUSG00000014602" cy:nodeId="178">
    <graphics z="0.0" y="107.5775313060922" x="164.78737598889057">
      <att name="lockedVisualProperties" type="list" cy:type="List">
        <att name="NODE_LABEL" value="" type="string" cy:type="String"/>
      </att>
    </graphics>
  </node>
  <node id="83498" label="ENSMUSG00000008540" cy:nodeId="1203">
    <graphics z="0.0" y="237.10588594926423" x="309.72609359346563">
      <att name="lockedVisualProperties" type="list" cy:type="List">
        <att name="NODE_LABEL" value="" type="string" cy:type="String"/>
      </att>
    </graphics>
  </node>
  <node id="83499" label="ENSMUSG00000009246" cy:nodeId="1204">
    <graphics z="0.0" y="339.18999246581956" x="-14.047241988916277">
      <att name="lockedVisualProperties" type="list" cy:type="List">
        <att name="NODE_LABEL" value="" type="string" cy:type="String"/>
      </att>
    </graphics>
  </node>
  <node id="83500" label="ENSMUSG00000009614" cy:nodeId="1206">
    <graphics z="0.0" y="47.43880953382321" x="522.779430756722">
      <att name="lockedVisualProperties" type="list" cy:type="List">
        <att name="NODE_LABEL" value="" type="string" cy:type="String"/>
      </att>
    </graphics>
  </node>
  <node id="83501" label="ENSMUSG00000015806" cy:nodeId="184">
    <graphics z="0.0" y="-23.754078524634537" x="324.73214172095913">
      <att name="lockedVisualProperties" type="list" cy:type="List">
        <att name="NODE_LABEL" value="" type="string" cy:type="String"/>
      </att>
    </graphics>
  </node>
  <node id="83502" label="ENSMUSG00000058586" cy:nodeId="2234">
    <graphics z="0.0" y="235.98697092678086" x="554.2500393721918">
      <att name="lockedVisualProperties" type="list" cy:type="List">
        <att name="NODE_LABEL" value="" type="string" cy:type="String"/>
      </att>
    </graphics>
  </node>
  <node id="83503" label="ENSMUSG00000058952" cy:nodeId="2237">
    <graphics z="0.0" y="438.91473388466034" x="395.731884822761">
      <att name="lockedVisualProperties" type="list" cy:type="List">
        <att name="NODE_LABEL" value="" type="string" cy:type="String"/>
      </att>
    </graphics>
  </node>
  <node id="83504" label="ENSMUSG00000059060" cy:nodeId="2238">
    <graphics z="0.0" y="375.4688206014243" x="369.8962415121396">
      <att name="lockedVisualProperties" type="list" cy:type="List">
        <att name="NODE_LABEL" value="" type="string" cy:type="String"/>
      </att>
    </graphics>
  </node>
  <node id="83505" label="ENSMUSG00000059149" cy:nodeId="2239">
    <graphics z="0.0" y="6.24512293499561" x="260.49030142760984">
      <att name="lockedVisualProperties" type="list" cy:type="List">
        <att name="NODE_LABEL" value="" type="string" cy:type="String"/>
      </att>
    </graphics>
  </node>
  <node id="83506" label="ENSMUSG00000017204" cy:nodeId="194">
    <graphics z="0.0" y="354.91408628925126" x="470.8847054715267">
      <att name="lockedVisualProperties" type="list" cy:type="List">
        <att name="NODE_LABEL" value="" type="string" cy:type="String"/>
      </att>
    </graphics>
  </node>
  <node id="83508" label="ENSMUSG00000059895" cy:nodeId="2244">
    <graphics z="0.0" y="-47.77903047135332" x="428.65970378235363">
      <att name="lockedVisualProperties" type="list" cy:type="List">
        <att name="NODE_LABEL" value="" type="string" cy:type="String"/>
      </att>
    </graphics>
  </node>
  <node id="83507" label="ENSMUSG00000013523" cy:nodeId="1220">
    <graphics z="0.0" y="352.199029778625" x="208.45685565171743">
      <att name="lockedVisualProperties" type="list" cy:type="List">
        <att name="NODE_LABEL" value="" type="string" cy:type="String"/>
      </att>
    </graphics>
  </node>
  <node id="83509" label="ENSMUSG00000014846" cy:nodeId="1224">
    <graphics z="0.0" y="81.48432926117859" x="406.7253360124636">
      <att name="lockedVisualProperties" type="list" cy:type="List">
        <att name="NODE_LABEL" value="" type="string" cy:type="String"/>
      </att>
    </graphics>
  </node>
  <node id="83511" label="ENSMUSG00000060613" cy:nodeId="2250">
    <graphics z="0.0" y="240.36669917849738" x="470.087823261754">
      <att name="lockedVisualProperties" type="list" cy:type="List">
        <att name="NODE_LABEL" value="" type="string" cy:type="String"/>
      </att>
    </graphics>
  </node>
  <node id="83510" label="ENSMUSG00000015189" cy:nodeId="1226">
    <graphics z="0.0" y="129.1209721905724" x="371.37936099070663">
      <att name="lockedVisualProperties" type="list" cy:type="List">
        <att name="NODE_LABEL" value="" type="string" cy:type="String"/>
      </att>
    </graphics>
  </node>
  <node id="83512" label="ENSMUSG00000018340" cy:nodeId="203">
    <graphics z="0.0" y="112.47130796624306" x="16.66617210836181">
      <att name="lockedVisualProperties" type="list" cy:type="List">
        <att name="NODE_LABEL" value="" type="string" cy:type="String"/>
      </att>
    </graphics>
  </node>
  <node id="83513" label="ENSMUSG00000015222" cy:nodeId="1227">
    <graphics z="0.0" y="-126.78890053870069" x="532.9422426485011">
      <att name="lockedVisualProperties" type="list" cy:type="List">
        <att name="NODE_LABEL" value="" type="string" cy:type="String"/>
      </att>
    </graphics>
  </node>
  <node id="83514" label="ENSMUSG00000018774" cy:nodeId="207">
    <graphics z="0.0" y="113.60973171680524" x="389.9228648444556">
      <att name="lockedVisualProperties" type="list" cy:type="List">
        <att name="NODE_LABEL" value="" type="string" cy:type="String"/>
      </att>
    </graphics>
  </node>
  <node id="83515" label="ENSMUSG00000015709" cy:nodeId="1232">
    <graphics z="0.0" y="324.5200613815855" x="-42.68935208605385">
      <att name="lockedVisualProperties" type="list" cy:type="List">
        <att name="NODE_LABEL" value="" type="string" cy:type="String"/>
      </att>
    </graphics>
  </node>
  <node id="83516" label="ENSMUSG00000015962" cy:nodeId="1233">
    <graphics z="0.0" y="194.22544997561738" x="-14.940676094307225">
      <att name="lockedVisualProperties" type="list" cy:type="List">
        <att name="NODE_LABEL" value="" type="string" cy:type="String"/>
      </att>
    </graphics>
  </node>
  <node id="83517" label="ENSMUSG00000016534" cy:nodeId="1235">
    <graphics z="0.0" y="106.47553038683293" x="77.46094100839164">
      <att name="lockedVisualProperties" type="list" cy:type="List">
        <att name="NODE_LABEL" value="" type="string" cy:type="String"/>
      </att>
    </graphics>
  </node>
  <node id="83518" label="ENSMUSG00000061838" cy:nodeId="2261">
    <graphics z="0.0" y="28.211496624250064" x="435.51244695355433">
      <att name="lockedVisualProperties" type="list" cy:type="List">
        <att name="NODE_LABEL" value="" type="string" cy:type="String"/>
      </att>
    </graphics>
  </node>
  <node id="83519" label="ENSMUSG00000019647" cy:nodeId="213">
    <graphics z="0.0" y="408.2430753488567" x="293.32552130579916">
      <att name="lockedVisualProperties" type="list" cy:type="List">
        <att name="NODE_LABEL" value="" type="string" cy:type="String"/>
      </att>
    </graphics>
  </node>
  <node id="83520" label="ENSMUSG00000061959" cy:nodeId="2262">
    <graphics z="0.0" y="-26.50478790465013" x="293.3429705495462">
      <att name="lockedVisualProperties" type="list" cy:type="List">
        <att name="NODE_LABEL" value="" type="string" cy:type="String"/>
      </att>
    </graphics>
  </node>
  <node id="83521" label="ENSMUSG00000019817" cy:nodeId="215">
    <graphics z="0.0" y="92.97076503719444" x="143.25842551360563">
      <att name="lockedVisualProperties" type="list" cy:type="List">
        <att name="NODE_LABEL" value="" type="string" cy:type="String"/>
      </att>
    </graphics>
  </node>
  <node id="83522" label="ENSMUSG00000017943" cy:nodeId="1243">
    <graphics z="0.0" y="235.12987021621285" x="679.8669948097488">
      <att name="lockedVisualProperties" type="list" cy:type="List">
        <att name="NODE_LABEL" value="" type="string" cy:type="String"/>
      </att>
    </graphics>
  </node>
  <node id="83523" label="ENSMUSG00000018507" cy:nodeId="1247">
    <graphics z="0.0" y="211.20288520816655" x="-47.3178078551995">
      <att name="lockedVisualProperties" type="list" cy:type="List">
        <att name="NODE_LABEL" value="" type="string" cy:type="String"/>
      </att>
    </graphics>
  </node>
  <node id="83524" label="ENSMUSG00000020105" cy:nodeId="225">
    <graphics z="0.0" y="75.98766091049363" x="97.51395227757118">
      <att name="lockedVisualProperties" type="list" cy:type="List">
        <att name="NODE_LABEL" value="" type="string" cy:type="String"/>
      </att>
    </graphics>
  </node>
  <node id="83525" label="ENSMUSG00000063704" cy:nodeId="2274">
    <graphics z="0.0" y="192.32889021715138" x="570.8381216205744">
      <att name="lockedVisualProperties" type="list" cy:type="List">
        <att name="NODE_LABEL" value="" type="string" cy:type="String"/>
      </att>
    </graphics>
  </node>
  <node id="83526" label="ENSMUSG00000020121" cy:nodeId="226">
    <graphics z="0.0" y="102.79331413947574" x="61.17131956930102">
      <att name="lockedVisualProperties" type="list" cy:type="List">
        <att name="NODE_LABEL" value="" type="string" cy:type="String"/>
      </att>
    </graphics>
  </node>
  <node id="83527" label="ENSMUSG00000018672" cy:nodeId="1250">
    <graphics z="0.0" y="-94.54065777477362" x="356.42176177952433">
      <att name="lockedVisualProperties" type="list" cy:type="List">
        <att name="NODE_LABEL" value="" type="string" cy:type="String"/>
      </att>
    </graphics>
  </node>
  <node id="83528" label="ENSMUSG00000020303" cy:nodeId="228">
    <graphics z="0.0" y="91.876945577272" x="278.9902930809999">
      <att name="lockedVisualProperties" type="list" cy:type="List">
        <att name="NODE_LABEL" value="" type="string" cy:type="String"/>
      </att>
    </graphics>
  </node>
  <node id="83529" label="ENSMUSG00000064080" cy:nodeId="2277">
    <graphics z="0.0" y="9.056069972705664" x="407.64025035421577">
      <att name="lockedVisualProperties" type="list" cy:type="List">
        <att name="NODE_LABEL" value="" type="string" cy:type="String"/>
      </att>
    </graphics>
  </node>
  <node id="83530" label="ENSMUSG00000020424" cy:nodeId="234">
    <graphics z="0.0" y="370.81860574003383" x="514.2191961822617">
      <att name="lockedVisualProperties" type="list" cy:type="List">
        <att name="NODE_LABEL" value="" type="string" cy:type="String"/>
      </att>
    </graphics>
  </node>
  <node id="83531" label="ENSMUSG00000020599" cy:nodeId="236">
    <graphics z="0.0" y="208.353467291997" x="321.8812626773575">
      <att name="lockedVisualProperties" type="list" cy:type="List">
        <att name="NODE_LABEL" value="" type="string" cy:type="String"/>
      </att>
    </graphics>
  </node>
  <node id="83532" label="ENSMUSG00000064272" cy:nodeId="2284">
    <graphics z="0.0" y="33.76674292665699" x="450.53513282704904">
      <att name="lockedVisualProperties" type="list" cy:type="List">
        <att name="NODE_LABEL" value="" type="string" cy:type="String"/>
      </att>
    </graphics>
  </node>
  <node id="83533" label="ENSMUSG00000019235" cy:nodeId="1261">
    <graphics z="0.0" y="380.17283232363155" x="145.2077711888394">
      <att name="lockedVisualProperties" type="list" cy:type="List">
        <att name="NODE_LABEL" value="" type="string" cy:type="String"/>
      </att>
    </graphics>
  </node>
  <node id="83534" label="ENSMUSG00000020668" cy:nodeId="238">
    <graphics z="0.0" y="410.32219028342473" x="395.2419652717583">
      <att name="lockedVisualProperties" type="list" cy:type="List">
        <att name="NODE_LABEL" value="" type="string" cy:type="String"/>
      </att>
    </graphics>
  </node>
  <node id="83535" label="ENSMUSG00000019775" cy:nodeId="1263">
    <graphics z="0.0" y="-90.68784700404814" x="282.0877451532029">
      <att name="lockedVisualProperties" type="list" cy:type="List">
        <att name="NODE_LABEL" value="" type="string" cy:type="String"/>
      </att>
    </graphics>
  </node>
  <node id="83536" label="ENSMUSG00000020674" cy:nodeId="239">
    <graphics z="0.0" y="289.0570234527089" x="494.1046839172901">
      <att name="lockedVisualProperties" type="list" cy:type="List">
        <att name="NODE_LABEL" value="" type="string" cy:type="String"/>
      </att>
    </graphics>
  </node>
  <node id="83537" label="ENSMUSG00000066191" cy:nodeId="2288">
    <graphics z="0.0" y="128.20445354410163" x="260.0738878416618">
      <att name="lockedVisualProperties" type="list" cy:type="List">
        <att name="NODE_LABEL" value="" type="string" cy:type="String"/>
      </att>
    </graphics>
  </node>
  <node id="83538" label="ENSMUSG00000020747" cy:nodeId="242">
    <graphics z="0.0" y="-39.8815003896037" x="182.46448950484708">
      <att name="lockedVisualProperties" type="list" cy:type="List">
        <att name="NODE_LABEL" value="" type="string" cy:type="String"/>
      </att>
    </graphics>
  </node>
  <node id="83539" label="ENSMUSG00000066441" cy:nodeId="2291">
    <graphics z="0.0" y="382.84814359364" x="482.6101731613346">
      <att name="lockedVisualProperties" type="list" cy:type="List">
        <att name="NODE_LABEL" value="" type="string" cy:type="String"/>
      </att>
    </graphics>
  </node>
  <node id="83540" label="ENSMUSG00000020846" cy:nodeId="244">
    <graphics z="0.0" y="360.518496250798" x="576.825905386317">
      <att name="lockedVisualProperties" type="list" cy:type="List">
        <att name="NODE_LABEL" value="" type="string" cy:type="String"/>
      </att>
    </graphics>
  </node>
  <node id="83541" label="ENSMUSG00000020010" cy:nodeId="1274">
    <graphics z="0.0" y="-3.668579680045127" x="342.1453143891137">
      <att name="lockedVisualProperties" type="list" cy:type="List">
        <att name="NODE_LABEL" value="" type="string" cy:type="String"/>
      </att>
    </graphics>
  </node>
  <node id="83542" label="ENSMUSG00000067818" cy:nodeId="2299">
    <graphics z="0.0" y="189.57733231946366" x="216.30128621366953">
      <att name="lockedVisualProperties" type="list" cy:type="List">
        <att name="NODE_LABEL" value="" type="string" cy:type="String"/>
      </att>
    </graphics>
  </node>
  <node id="83543" label="ENSMUSG00000068101" cy:nodeId="2301">
    <graphics z="0.0" y="22.234116537111497" x="-19.64767265895712">
      <att name="lockedVisualProperties" type="list" cy:type="List">
        <att name="NODE_LABEL" value="" type="string" cy:type="String"/>
      </att>
    </graphics>
  </node>
  <node id="83544" label="ENSMUSG00000021194" cy:nodeId="253">
    <graphics z="0.0" y="5.44229850104546" x="206.78598275397155">
      <att name="lockedVisualProperties" type="list" cy:type="List">
        <att name="NODE_LABEL" value="" type="string" cy:type="String"/>
      </att>
    </graphics>
  </node>
  <node id="83545" label="ENSMUSG00000021203" cy:nodeId="255">
    <graphics z="0.0" y="427.9061345194366" x="3.2388807903068084">
      <att name="lockedVisualProperties" type="list" cy:type="List">
        <att name="NODE_LABEL" value="" type="string" cy:type="String"/>
      </att>
    </graphics>
  </node>
  <node id="83546" label="ENSMUSG00000021223" cy:nodeId="256">
    <graphics z="0.0" y="291.3723314895486" x="8.661032820100406">
      <att name="lockedVisualProperties" type="list" cy:type="List">
        <att name="NODE_LABEL" value="" type="string" cy:type="String"/>
      </att>
    </graphics>
  </node>
  <node id="83547" label="ENSMUSG00000021240" cy:nodeId="257">
    <graphics z="0.0" y="227.50971030226356" x="442.33444508543084">
      <att name="lockedVisualProperties" type="list" cy:type="List">
        <att name="NODE_LABEL" value="" type="string" cy:type="String"/>
      </att>
    </graphics>
  </node>
  <node id="83548" label="ENSMUSG00000068323" cy:nodeId="2305">
    <graphics z="0.0" y="299.94960461413734" x="178.63084636013377">
      <att name="lockedVisualProperties" type="list" cy:type="List">
        <att name="NODE_LABEL" value="" type="string" cy:type="String"/>
      </att>
    </graphics>
  </node>
  <node id="83549" label="ENSMUSG00000068874" cy:nodeId="2307">
    <graphics z="0.0" y="427.1376906381869" x="401.85867964446214">
      <att name="lockedVisualProperties" type="list" cy:type="List">
        <att name="NODE_LABEL" value="" type="string" cy:type="String"/>
      </att>
    </graphics>
  </node>
  <node id="83550" label="ENSMUSG00000021367" cy:nodeId="259">
    <graphics z="0.0" y="263.68098058419423" x="324.97706284101434">
      <att name="lockedVisualProperties" type="list" cy:type="List">
        <att name="NODE_LABEL" value="" type="string" cy:type="String"/>
      </att>
    </graphics>
  </node>
  <node id="83551" label="ENSMUSG00000021604" cy:nodeId="263">
    <graphics z="0.0" y="221.76610173636976" x="92.89857931691364">
      <att name="lockedVisualProperties" type="list" cy:type="List">
        <att name="NODE_LABEL" value="" type="string" cy:type="String"/>
      </att>
    </graphics>
  </node>
  <node id="83552" label="ENSMUSG00000020388" cy:nodeId="1288">
    <graphics z="0.0" y="504.9699052156585" x="325.079929667267">
      <att name="lockedVisualProperties" type="list" cy:type="List">
        <att name="NODE_LABEL" value="" type="string" cy:type="String"/>
      </att>
    </graphics>
  </node>
  <node id="83553" label="ENSMUSG00000020462" cy:nodeId="1293">
    <graphics z="0.0" y="-59.557869427790855" x="63.41934319044546">
      <att name="lockedVisualProperties" type="list" cy:type="List">
        <att name="NODE_LABEL" value="" type="string" cy:type="String"/>
      </att>
    </graphics>
  </node>
  <node id="83554" label="ENSMUSG00000020467" cy:nodeId="1294">
    <graphics z="0.0" y="-62.00693743629165" x="116.42688996159919">
      <att name="lockedVisualProperties" type="list" cy:type="List">
        <att name="NODE_LABEL" value="" type="string" cy:type="String"/>
      </att>
    </graphics>
  </node>
  <node id="83555" label="ENSMUSG00000070661" cy:nodeId="2318">
    <graphics z="0.0" y="-75.69934954396125" x="108.00454995584857">
      <att name="lockedVisualProperties" type="list" cy:type="List">
        <att name="NODE_LABEL" value="" type="string" cy:type="String"/>
      </att>
    </graphics>
  </node>
  <node id="83556" label="ENSMUSG00000070803" cy:nodeId="2319">
    <graphics z="0.0" y="-48.83246885711323" x="50.95365488363733">
      <att name="lockedVisualProperties" type="list" cy:type="List">
        <att name="NODE_LABEL" value="" type="string" cy:type="String"/>
      </att>
    </graphics>
  </node>
  <node id="83557" label="ENSMUSG00000022033" cy:nodeId="273">
    <graphics z="0.0" y="273.88575053051574" x="162.13699998299842">
      <att name="lockedVisualProperties" type="list" cy:type="List">
        <att name="NODE_LABEL" value="" type="string" cy:type="String"/>
      </att>
    </graphics>
  </node>
  <node id="83558" label="ENSMUSG00000020572" cy:nodeId="1298">
    <graphics z="0.0" y="228.67217753810243" x="416.5155162016021">
      <att name="lockedVisualProperties" type="list" cy:type="List">
        <att name="NODE_LABEL" value="" type="string" cy:type="String"/>
      </att>
    </graphics>
  </node>
  <node id="83559" label="ENSMUSG00000022051" cy:nodeId="274">
    <graphics z="0.0" y="247.10743969045424" x="377.57156074787326">
      <att name="lockedVisualProperties" type="list" cy:type="List">
        <att name="NODE_LABEL" value="" type="string" cy:type="String"/>
      </att>
    </graphics>
  </node>
  <node id="83560" label="ENSMUSG00000020658" cy:nodeId="1301">
    <graphics z="0.0" y="43.71458777213744" x="-5.270248102117705">
      <att name="lockedVisualProperties" type="list" cy:type="List">
        <att name="NODE_LABEL" value="" type="string" cy:type="String"/>
      </att>
    </graphics>
  </node>
  <node id="83561" label="ENSMUSG00000072294" cy:nodeId="2326">
    <graphics z="0.0" y="220.40877208334408" x="14.467928259875244">
      <att name="lockedVisualProperties" type="list" cy:type="List">
        <att name="NODE_LABEL" value="" type="string" cy:type="String"/>
      </att>
    </graphics>
  </node>
  <node id="83562" label="ENSMUSG00000022178" cy:nodeId="278">
    <graphics z="0.0" y="65.8997437291508" x="388.33317221723456">
      <att name="lockedVisualProperties" type="list" cy:type="List">
        <att name="NODE_LABEL" value="" type="string" cy:type="String"/>
      </att>
    </graphics>
  </node>
  <node id="83563" label="ENSMUSG00000020696" cy:nodeId="1303">
    <graphics z="0.0" y="281.591409557091" x="452.0685482901621">
      <att name="lockedVisualProperties" type="list" cy:type="List">
        <att name="NODE_LABEL" value="" type="string" cy:type="String"/>
      </att>
    </graphics>
  </node>
  <node id="83564" label="ENSMUSG00000020707" cy:nodeId="1304">
    <graphics z="0.0" y="99.51345953452117" x="1.9173369306659014">
      <att name="lockedVisualProperties" type="list" cy:type="List">
        <att name="NODE_LABEL" value="" type="string" cy:type="String"/>
      </att>
    </graphics>
  </node>
  <node id="83565" label="ENSMUSG00000022219" cy:nodeId="281">
    <graphics z="0.0" y="432.1480545661691" x="486.1160389382926">
      <att name="lockedVisualProperties" type="list" cy:type="List">
        <att name="NODE_LABEL" value="" type="string" cy:type="String"/>
      </att>
    </graphics>
  </node>
  <node id="83566" label="ENSMUSG00000020732" cy:nodeId="1305">
    <graphics z="0.0" y="289.5215028653513" x="177.9908403658883">
      <att name="lockedVisualProperties" type="list" cy:type="List">
        <att name="NODE_LABEL" value="" type="string" cy:type="String"/>
      </att>
    </graphics>
  </node>
  <node id="83567" label="ENSMUSG00000020766" cy:nodeId="1306">
    <graphics z="0.0" y="-65.72301291902663" x="349.8932534736708">
      <att name="lockedVisualProperties" type="list" cy:type="List">
        <att name="NODE_LABEL" value="" type="string" cy:type="String"/>
      </att>
    </graphics>
  </node>
  <node id="83568" label="ENSMUSG00000020788" cy:nodeId="1307">
    <graphics z="0.0" y="256.95090775106104" x="653.8243966048855">
      <att name="lockedVisualProperties" type="list" cy:type="List">
        <att name="NODE_LABEL" value="" type="string" cy:type="String"/>
      </att>
    </graphics>
  </node>
  <node id="83569" label="ENSMUSG00000073481" cy:nodeId="2333">
    <graphics z="0.0" y="366.7249956830699" x="391.9246000558245">
      <att name="lockedVisualProperties" type="list" cy:type="List">
        <att name="NODE_LABEL" value="" type="string" cy:type="String"/>
      </att>
    </graphics>
  </node>
  <node id="83570" label="ENSMUSG00000022519" cy:nodeId="287">
    <graphics z="0.0" y="400.2481463927411" x="77.27137916996156">
      <att name="lockedVisualProperties" type="list" cy:type="List">
        <att name="NODE_LABEL" value="" type="string" cy:type="String"/>
      </att>
    </graphics>
  </node>
  <node id="83571" label="ENSMUSG00000020986" cy:nodeId="1312">
    <graphics z="0.0" y="-95.53353147789801" x="469.14039884926035">
      <att name="lockedVisualProperties" type="list" cy:type="List">
        <att name="NODE_LABEL" value="" type="string" cy:type="String"/>
      </att>
    </graphics>
  </node>
  <node id="83572" label="ENSMUSG00000021123" cy:nodeId="1315">
    <graphics z="0.0" y="449.20114122327635" x="20.91639923548778">
      <att name="lockedVisualProperties" type="list" cy:type="List">
        <att name="NODE_LABEL" value="" type="string" cy:type="String"/>
      </att>
    </graphics>
  </node>
  <node id="83573" label="ENSMUSG00000022637" cy:nodeId="292">
    <graphics z="0.0" y="383.7904997988713" x="312.66292264117146">
      <att name="lockedVisualProperties" type="list" cy:type="List">
        <att name="NODE_LABEL" value="" type="string" cy:type="String"/>
      </att>
    </graphics>
  </node>
  <node id="83574" label="ENSMUSG00000022652" cy:nodeId="293">
    <graphics z="0.0" y="309.38866248867424" x="652.0731801724525">
      <att name="lockedVisualProperties" type="list" cy:type="List">
        <att name="NODE_LABEL" value="" type="string" cy:type="String"/>
      </att>
    </graphics>
  </node>
  <node id="83575" label="ENSMUSG00000022742" cy:nodeId="294">
    <graphics z="0.0" y="531.953550160498" x="173.41736815866687">
      <att name="lockedVisualProperties" type="list" cy:type="List">
        <att name="NODE_LABEL" value="" type="string" cy:type="String"/>
      </att>
    </graphics>
  </node>
  <node id="83576" label="ENSMUSG00000074207" cy:nodeId="2342">
    <graphics z="0.0" y="382.12022004479724" x="258.64515030633305">
      <att name="lockedVisualProperties" type="list" cy:type="List">
        <att name="NODE_LABEL" value="" type="string" cy:type="String"/>
      </att>
    </graphics>
  </node>
  <node id="83577" label="ENSMUSG00000022817" cy:nodeId="295">
    <graphics z="0.0" y="364.658438344717" x="155.6857364930305">
      <att name="lockedVisualProperties" type="list" cy:type="List">
        <att name="NODE_LABEL" value="" type="string" cy:type="String"/>
      </att>
    </graphics>
  </node>
  <node id="83578" label="ENSMUSG00000022844" cy:nodeId="298">
    <graphics z="0.0" y="163.46691744269853" x="416.3869786121574">
      <att name="lockedVisualProperties" type="list" cy:type="List">
        <att name="NODE_LABEL" value="" type="string" cy:type="String"/>
      </att>
    </graphics>
  </node>
  <node id="83579" label="ENSMUSG00000021303" cy:nodeId="1322">
    <graphics z="0.0" y="509.35197682033186" x="264.49176844664805">
      <att name="lockedVisualProperties" type="list" cy:type="List">
        <att name="NODE_LABEL" value="" type="string" cy:type="String"/>
      </att>
    </graphics>
  </node>
  <node id="83580" label="ENSMUSG00000074628" cy:nodeId="2350">
    <graphics z="0.0" y="122.17095956463467" x="511.00415455281893">
      <att name="lockedVisualProperties" type="list" cy:type="List">
        <att name="NODE_LABEL" value="" type="string" cy:type="String"/>
      </att>
    </graphics>
  </node>
  <node id="83581" label="ENSMUSG00000023015" cy:nodeId="305">
    <graphics z="0.0" y="420.3681673783037" x="365.80153728522896">
      <att name="lockedVisualProperties" type="list" cy:type="List">
        <att name="NODE_LABEL" value="" type="string" cy:type="String"/>
      </att>
    </graphics>
  </node>
  <node id="83582" label="ENSMUSG00000021608" cy:nodeId="1330">
    <graphics z="0.0" y="61.91430181027886" x="-52.61250423594683">
      <att name="lockedVisualProperties" type="list" cy:type="List">
        <att name="NODE_LABEL" value="" type="string" cy:type="String"/>
      </att>
    </graphics>
  </node>
  <node id="83583" label="ENSMUSG00000023247" cy:nodeId="310">
    <graphics z="0.0" y="420.1110839796852" x="386.3500165103715">
      <att name="lockedVisualProperties" type="list" cy:type="List">
        <att name="NODE_LABEL" value="" type="string" cy:type="String"/>
      </att>
    </graphics>
  </node>
  <node id="83584" label="ENSMUSG00000021685" cy:nodeId="1334">
    <graphics z="0.0" y="9.600789786450651" x="454.6902729884959">
      <att name="lockedVisualProperties" type="list" cy:type="List">
        <att name="NODE_LABEL" value="" type="string" cy:type="String"/>
      </att>
    </graphics>
  </node>
  <node id="83585" label="ENSMUSG00000075033" cy:nodeId="2359">
    <graphics z="0.0" y="481.79653123993546" x="380.2450255847896">
      <att name="lockedVisualProperties" type="list" cy:type="List">
        <att name="NODE_LABEL" value="" type="string" cy:type="String"/>
      </att>
    </graphics>
  </node>
  <node id="83586" label="ENSMUSG00000021700" cy:nodeId="1335">
    <graphics z="0.0" y="85.06744241892852" x="586.5495540196004">
      <att name="lockedVisualProperties" type="list" cy:type="List">
        <att name="NODE_LABEL" value="" type="string" cy:type="String"/>
      </att>
    </graphics>
  </node>
  <node id="83587" label="ENSMUSG00000023800" cy:nodeId="313">
    <graphics z="0.0" y="-78.5302665585164" x="176.19491252277692">
      <att name="lockedVisualProperties" type="list" cy:type="List">
        <att name="NODE_LABEL" value="" type="string" cy:type="String"/>
      </att>
    </graphics>
  </node>
  <node id="83588" label="ENSMUSG00000021798" cy:nodeId="1339">
    <graphics z="0.0" y="67.43347186564864" x="-30.2361048794077">
      <att name="lockedVisualProperties" type="list" cy:type="List">
        <att name="NODE_LABEL" value="" type="string" cy:type="String"/>
      </att>
    </graphics>
  </node>
  <node id="83589" label="ENSMUSG00000021913" cy:nodeId="1343">
    <graphics z="0.0" y="153.38955229280154" x="125.81345596588844">
      <att name="lockedVisualProperties" type="list" cy:type="List">
        <att name="NODE_LABEL" value="" type="string" cy:type="String"/>
      </att>
    </graphics>
  </node>
  <node id="83590" label="ENSMUSG00000021928" cy:nodeId="1344">
    <graphics z="0.0" y="130.07875791963073" x="-66.45854829691581">
      <att name="lockedVisualProperties" type="list" cy:type="List">
        <att name="NODE_LABEL" value="" type="string" cy:type="String"/>
      </att>
    </graphics>
  </node>
  <node id="83591" label="ENSMUSG00000078349" cy:nodeId="2368">
    <graphics z="0.0" y="117.98391439400714" x="-76.304222082777">
      <att name="lockedVisualProperties" type="list" cy:type="List">
        <att name="NODE_LABEL" value="" type="string" cy:type="String"/>
      </att>
    </graphics>
  </node>
  <node id="83592" label="ENSMUSG00000023963" cy:nodeId="320">
    <graphics z="0.0" y="233.52994767521818" x="144.11148484750424">
      <att name="lockedVisualProperties" type="list" cy:type="List">
        <att name="NODE_LABEL" value="" type="string" cy:type="String"/>
      </att>
    </graphics>
  </node>
  <node id="83593" label="ENSMUSG00000021944" cy:nodeId="1345">
    <graphics z="0.0" y="229.23330414223992" x="185.90813303482437">
      <att name="lockedVisualProperties" type="list" cy:type="List">
        <att name="NODE_LABEL" value="" type="string" cy:type="String"/>
      </att>
    </graphics>
  </node>
  <node id="83594" label="ENSMUSG00000021994" cy:nodeId="1347">
    <graphics z="0.0" y="341.96431226393713" x="-55.80441383272804">
      <att name="lockedVisualProperties" type="list" cy:type="List">
        <att name="NODE_LABEL" value="" type="string" cy:type="String"/>
      </att>
    </graphics>
  </node>
  <node id="83595" label="ENSMUSG00000024140" cy:nodeId="324">
    <graphics z="0.0" y="532.014493901687" x="528.8686413149846">
      <att name="lockedVisualProperties" type="list" cy:type="List">
        <att name="NODE_LABEL" value="" type="string" cy:type="String"/>
      </att>
    </graphics>
  </node>
  <node id="83596" label="ENSMUSG00000078695" cy:nodeId="2374">
    <graphics z="0.0" y="-87.30670391554241" x="400.29580718330055">
      <att name="lockedVisualProperties" type="list" cy:type="List">
        <att name="NODE_LABEL" value="" type="string" cy:type="String"/>
      </att>
    </graphics>
  </node>
  <node id="83597" label="ENSMUSG00000024352" cy:nodeId="329">
    <graphics z="0.0" y="505.02436927451276" x="189.48377262392046">
      <att name="lockedVisualProperties" type="list" cy:type="List">
        <att name="NODE_LABEL" value="" type="string" cy:type="String"/>
      </att>
    </graphics>
  </node>
  <node id="83598" label="ENSMUSG00000079038" cy:nodeId="2379">
    <graphics z="0.0" y="32.91284502357707" x="135.90436277663196">
      <att name="lockedVisualProperties" type="list" cy:type="List">
        <att name="NODE_LABEL" value="" type="string" cy:type="String"/>
      </att>
    </graphics>
  </node>
  <node id="83599" label="ENSMUSG00000024479" cy:nodeId="331">
    <graphics z="0.0" y="499.8171921270552" x="392.54570817232053">
      <att name="lockedVisualProperties" type="list" cy:type="List">
        <att name="NODE_LABEL" value="" type="string" cy:type="String"/>
      </att>
    </graphics>
  </node>
  <node id="83600" label="ENSMUSG00000024548" cy:nodeId="333">
    <graphics z="0.0" y="438.2750036444963" x="116.43754671692378">
      <att name="lockedVisualProperties" type="list" cy:type="List">
        <att name="NODE_LABEL" value="" type="string" cy:type="String"/>
      </att>
    </graphics>
  </node>
  <node id="83601" label="ENSMUSG00000022332" cy:nodeId="1359">
    <graphics z="0.0" y="57.0171919450206" x="626.1544795319062">
      <att name="lockedVisualProperties" type="list" cy:type="List">
        <att name="NODE_LABEL" value="" type="string" cy:type="String"/>
      </att>
    </graphics>
  </node>
  <node id="83602" label="ENSMUSG00000022435" cy:nodeId="1360">
    <graphics z="0.0" y="451.62542599706256" x="197.7932366061821">
      <att name="lockedVisualProperties" type="list" cy:type="List">
        <att name="NODE_LABEL" value="" type="string" cy:type="String"/>
      </att>
    </graphics>
  </node>
  <node id="83603" label="ENSMUSG00000022436" cy:nodeId="1361">
    <graphics z="0.0" y="59.88569985106439" x="98.81667541110691">
      <att name="lockedVisualProperties" type="list" cy:type="List">
        <att name="NODE_LABEL" value="" type="string" cy:type="String"/>
      </att>
    </graphics>
  </node>
  <node id="83604" label="ENSMUSG00000024659" cy:nodeId="338">
    <graphics z="0.0" y="64.00393585090117" x="53.584103948056324">
      <att name="lockedVisualProperties" type="list" cy:type="List">
        <att name="NODE_LABEL" value="" type="string" cy:type="String"/>
      </att>
    </graphics>
  </node>
  <node id="83605" label="ENSMUSG00000024713" cy:nodeId="339">
    <graphics z="0.0" y="355.1037686632233" x="42.91499268154573">
      <att name="lockedVisualProperties" type="list" cy:type="List">
        <att name="NODE_LABEL" value="" type="string" cy:type="String"/>
      </att>
    </graphics>
  </node>
  <node id="83606" label="ENSMUSG00000022456" cy:nodeId="1363">
    <graphics z="0.0" y="166.42061770603345" x="659.4938874321625">
      <att name="lockedVisualProperties" type="list" cy:type="List">
        <att name="NODE_LABEL" value="" type="string" cy:type="String"/>
      </att>
    </graphics>
  </node>
  <node id="83607" label="ENSMUSG00000022477" cy:nodeId="1364">
    <graphics z="0.0" y="134.46563822910178" x="529.3084520809346">
      <att name="lockedVisualProperties" type="list" cy:type="List">
        <att name="NODE_LABEL" value="" type="string" cy:type="String"/>
      </att>
    </graphics>
  </node>
  <node id="83608" label="ENSMUSG00000024727" cy:nodeId="340">
    <graphics z="0.0" y="537.0462016517741" x="295.78445614643147">
      <att name="lockedVisualProperties" type="list" cy:type="List">
        <att name="NODE_LABEL" value="" type="string" cy:type="String"/>
      </att>
    </graphics>
  </node>
  <node id="83609" label="ENSMUSG00000022489" cy:nodeId="1365">
    <graphics z="0.0" y="236.08791620799394" x="257.81289374299956">
      <att name="lockedVisualProperties" type="list" cy:type="List">
        <att name="NODE_LABEL" value="" type="string" cy:type="String"/>
      </att>
    </graphics>
  </node>
  <node id="83610" label="ENSMUSG00000024738" cy:nodeId="341">
    <graphics z="0.0" y="468.5319273561896" x="261.69364515135373">
      <att name="lockedVisualProperties" type="list" cy:type="List">
        <att name="NODE_LABEL" value="" type="string" cy:type="String"/>
      </att>
    </graphics>
  </node>
  <node id="83611" label="ENSMUSG00000024810" cy:nodeId="344">
    <graphics z="0.0" y="139.93635222168746" x="234.98397288456783">
      <att name="lockedVisualProperties" type="list" cy:type="List">
        <att name="NODE_LABEL" value="" type="string" cy:type="String"/>
      </att>
    </graphics>
  </node>
  <node id="83612" label="ENSMUSG00000024897" cy:nodeId="346">
    <graphics z="0.0" y="393.0371448751149" x="48.56064928900873">
      <att name="lockedVisualProperties" type="list" cy:type="List">
        <att name="NODE_LABEL" value="" type="string" cy:type="String"/>
      </att>
    </graphics>
  </node>
  <node id="83613" label="ENSMUSG00000024899" cy:nodeId="347">
    <graphics z="0.0" y="152.4269515522041" x="-29.041638860561658">
      <att name="lockedVisualProperties" type="list" cy:type="List">
        <att name="NODE_LABEL" value="" type="string" cy:type="String"/>
      </att>
    </graphics>
  </node>
  <node id="83614" label="ENSMUSG00000024978" cy:nodeId="349">
    <graphics z="0.0" y="434.5389058472772" x="225.81875311026258">
      <att name="lockedVisualProperties" type="list" cy:type="List">
        <att name="NODE_LABEL" value="" type="string" cy:type="String"/>
      </att>
    </graphics>
  </node>
  <node id="83615" label="ENSMUSG00000022619" cy:nodeId="1375">
    <graphics z="0.0" y="-21.833647097144365" x="89.68364307603633">
      <att name="lockedVisualProperties" type="list" cy:type="List">
        <att name="NODE_LABEL" value="" type="string" cy:type="String"/>
      </att>
    </graphics>
  </node>
  <node id="83616" label="ENSMUSG00000092083" cy:nodeId="2399">
    <graphics z="0.0" y="519.2210694649141" x="476.65955505470913">
      <att name="lockedVisualProperties" type="list" cy:type="List">
        <att name="NODE_LABEL" value="" type="string" cy:type="String"/>
      </att>
    </graphics>
  </node>
  <node id="83617" label="ENSMUSG00000025089" cy:nodeId="355">
    <graphics z="0.0" y="373.0118675490767" x="620.1916547288491">
      <att name="lockedVisualProperties" type="list" cy:type="List">
        <att name="NODE_LABEL" value="" type="string" cy:type="String"/>
      </att>
    </graphics>
  </node>
  <node id="83618" label="ENSMUSG00000025227" cy:nodeId="358">
    <graphics z="0.0" y="379.50108490668384" x="408.3180957258747">
      <att name="lockedVisualProperties" type="list" cy:type="List">
        <att name="NODE_LABEL" value="" type="string" cy:type="String"/>
      </att>
    </graphics>
  </node>
  <node id="83619" label="ENSMUSG00000025351" cy:nodeId="359">
    <graphics z="0.0" y="243.06172937514162" x="68.84961797378413">
      <att name="lockedVisualProperties" type="list" cy:type="List">
        <att name="NODE_LABEL" value="" type="string" cy:type="String"/>
      </att>
    </graphics>
  </node>
  <node id="83620" label="ENSMUSG00000025410" cy:nodeId="361">
    <graphics z="0.0" y="330.2959577403778" x="381.2188098446881">
      <att name="lockedVisualProperties" type="list" cy:type="List">
        <att name="NODE_LABEL" value="" type="string" cy:type="String"/>
      </att>
    </graphics>
  </node>
  <node id="83621" label="ENSMUSG00000022863" cy:nodeId="1385">
    <graphics z="0.0" y="394.87921826876556" x="-16.31012721271098">
      <att name="lockedVisualProperties" type="list" cy:type="List">
        <att name="NODE_LABEL" value="" type="string" cy:type="String"/>
      </att>
    </graphics>
  </node>
  <node id="83622" label="ENSMUSG00000023045" cy:nodeId="1390">
    <graphics z="0.0" y="190.81825638002567" x="-55.42419301223232">
      <att name="lockedVisualProperties" type="list" cy:type="List">
        <att name="NODE_LABEL" value="" type="string" cy:type="String"/>
      </att>
    </graphics>
  </node>
  <node id="83623" label="ENSMUSG00000025557" cy:nodeId="366">
    <graphics z="0.0" y="339.2369004201691" x="-0.7814160146763101">
      <att name="lockedVisualProperties" type="list" cy:type="List">
        <att name="NODE_LABEL" value="" type="string" cy:type="String"/>
      </att>
    </graphics>
  </node>
  <node id="83624" label="ENSMUSG00000110206" cy:nodeId="2416">
    <graphics z="0.0" y="424.83938366915544" x="27.375084899982475">
      <att name="lockedVisualProperties" type="list" cy:type="List">
        <att name="NODE_LABEL" value="" type="string" cy:type="String"/>
      </att>
    </graphics>
  </node>
  <node id="83625" label="ENSMUSG00000025876" cy:nodeId="371">
    <graphics z="0.0" y="131.0880057218305" x="244.75848881013226">
      <att name="lockedVisualProperties" type="list" cy:type="List">
        <att name="NODE_LABEL" value="" type="string" cy:type="String"/>
      </att>
    </graphics>
  </node>
  <node id="83626" label="ENSMUSG00000023243" cy:nodeId="1396">
    <graphics z="0.0" y="85.74021113895424" x="521.5616142050125">
      <att name="lockedVisualProperties" type="list" cy:type="List">
        <att name="NODE_LABEL" value="" type="string" cy:type="String"/>
      </att>
    </graphics>
  </node>
  <node id="83627" label="ENSMUSG00000025991" cy:nodeId="376">
    <graphics z="0.0" y="324.9216889857321" x="48.2332418051269">
      <att name="lockedVisualProperties" type="list" cy:type="List">
        <att name="NODE_LABEL" value="" type="string" cy:type="String"/>
      </att>
    </graphics>
  </node>
  <node id="83628" label="ENSMUSG00000023829" cy:nodeId="1401">
    <graphics z="0.0" y="223.21623550791756" x="-116.32802309966519">
      <att name="lockedVisualProperties" type="list" cy:type="List">
        <att name="NODE_LABEL" value="" type="string" cy:type="String"/>
      </att>
    </graphics>
  </node>
  <node id="83629" label="ENSMUSG00000026247" cy:nodeId="381">
    <graphics z="0.0" y="133.60518750651673" x="343.92325335962556">
      <att name="lockedVisualProperties" type="list" cy:type="List">
        <att name="NODE_LABEL" value="" type="string" cy:type="String"/>
      </att>
    </graphics>
  </node>
  <node id="83630" label="ENSMUSG00000024029" cy:nodeId="1408">
    <graphics z="0.0" y="3.9543517387481417" x="409.71151967358475">
      <att name="lockedVisualProperties" type="list" cy:type="List">
        <att name="NODE_LABEL" value="" type="string" cy:type="String"/>
      </att>
    </graphics>
  </node>
  <node id="83631" label="ENSMUSG00000026430" cy:nodeId="384">
    <graphics z="0.0" y="393.65239085887947" x="279.02873561339766">
      <att name="lockedVisualProperties" type="list" cy:type="List">
        <att name="NODE_LABEL" value="" type="string" cy:type="String"/>
      </att>
    </graphics>
  </node>
  <node id="83632" label="ENSMUSG00000026442" cy:nodeId="385">
    <graphics z="0.0" y="261.2439709673832" x="457.1189178701638">
      <att name="lockedVisualProperties" type="list" cy:type="List">
        <att name="NODE_LABEL" value="" type="string" cy:type="String"/>
      </att>
    </graphics>
  </node>
  <node id="83633" label="ENSMUSG00000024055" cy:nodeId="1410">
    <graphics z="0.0" y="-79.03508614120865" x="219.36060291206422">
      <att name="lockedVisualProperties" type="list" cy:type="List">
        <att name="NODE_LABEL" value="" type="string" cy:type="String"/>
      </att>
    </graphics>
  </node>
  <node id="83634" label="ENSMUSG00000026483" cy:nodeId="387">
    <graphics z="0.0" y="300.201280583972" x="258.5347658814476">
      <att name="lockedVisualProperties" type="list" cy:type="List">
        <att name="NODE_LABEL" value="" type="string" cy:type="String"/>
      </att>
    </graphics>
  </node>
  <node id="83635" label="ENSMUSG00000024063" cy:nodeId="1411">
    <graphics z="0.0" y="452.8631748132671" x="345.114281896108">
      <att name="lockedVisualProperties" type="list" cy:type="List">
        <att name="NODE_LABEL" value="" type="string" cy:type="String"/>
      </att>
    </graphics>
  </node>
  <node id="83636" label="ENSMUSG00000026504" cy:nodeId="388">
    <graphics z="0.0" y="444.9520464662305" x="590.0711931358978">
      <att name="lockedVisualProperties" type="list" cy:type="List">
        <att name="NODE_LABEL" value="" type="string" cy:type="String"/>
      </att>
    </graphics>
  </node>
  <node id="83637" label="ENSMUSG00000024175" cy:nodeId="1416">
    <graphics z="0.0" y="56.19188760073072" x="484.68740976554125">
      <att name="lockedVisualProperties" type="list" cy:type="List">
        <att name="NODE_LABEL" value="" type="string" cy:type="String"/>
      </att>
    </graphics>
  </node>
  <node id="83638" label="ENSMUSG00000024292" cy:nodeId="1418">
    <graphics z="0.0" y="421.5793924390427" x="-99.2572992404216">
      <att name="lockedVisualProperties" type="list" cy:type="List">
        <att name="NODE_LABEL" value="" type="string" cy:type="String"/>
      </att>
    </graphics>
  </node>
  <node id="83639" label="ENSMUSG00000001128" cy:nodeId="2442">
    <graphics z="0.0" y="226.47207159085278" x="259.9491212647319">
      <att name="lockedVisualProperties" type="list" cy:type="List">
        <att name="NODE_LABEL" value="" type="string" cy:type="String"/>
      </att>
    </graphics>
  </node>
  <node id="83640" label="ENSMUSG00000024302" cy:nodeId="1419">
    <graphics z="0.0" y="-11.437961800002176" x="10.383825651773705">
      <att name="lockedVisualProperties" type="list" cy:type="List">
        <att name="NODE_LABEL" value="" type="string" cy:type="String"/>
      </att>
    </graphics>
  </node>
  <node id="83641" label="ENSMUSG00000027805" cy:nodeId="2444">
    <graphics z="0.0" y="259.8661946205226" x="12.115544574401767">
      <att name="lockedVisualProperties" type="list" cy:type="List">
        <att name="NODE_LABEL" value="" type="string" cy:type="String"/>
      </att>
    </graphics>
  </node>
  <node id="83642" label="ENSMUSG00000026848" cy:nodeId="397">
    <graphics z="0.0" y="-30.98927933291499" x="330.32849323658417">
      <att name="lockedVisualProperties" type="list" cy:type="List">
        <att name="NODE_LABEL" value="" type="string" cy:type="String"/>
      </att>
    </graphics>
  </node>
  <node id="83643" label="ENSMUSG00000024411" cy:nodeId="1424">
    <graphics z="0.0" y="381.77848445994584" x="87.05022017001198">
      <att name="lockedVisualProperties" type="list" cy:type="List">
        <att name="NODE_LABEL" value="" type="string" cy:type="String"/>
      </att>
    </graphics>
  </node>
  <node id="83644" label="ENSMUSG00000024424" cy:nodeId="1427">
    <graphics z="0.0" y="257.2408649888473" x="357.5742030771442">
      <att name="lockedVisualProperties" type="list" cy:type="List">
        <att name="NODE_LABEL" value="" type="string" cy:type="String"/>
      </att>
    </graphics>
  </node>
  <node id="83645" label="ENSMUSG00000026981" cy:nodeId="403">
    <graphics z="0.0" y="192.10900033874327" x="8.309947694398616">
      <att name="lockedVisualProperties" type="list" cy:type="List">
        <att name="NODE_LABEL" value="" type="string" cy:type="String"/>
      </att>
    </graphics>
  </node>
  <node id="83646" label="ENSMUSG00000027187" cy:nodeId="406">
    <graphics z="0.0" y="-46.82996333972612" x="255.1176972005564">
      <att name="lockedVisualProperties" type="list" cy:type="List">
        <att name="NODE_LABEL" value="" type="string" cy:type="String"/>
      </att>
    </graphics>
  </node>
  <node id="83647" label="ENSMUSG00000024533" cy:nodeId="1434">
    <graphics z="0.0" y="-27.257944868357903" x="291.8817549010459">
      <att name="lockedVisualProperties" type="list" cy:type="List">
        <att name="NODE_LABEL" value="" type="string" cy:type="String"/>
      </att>
    </graphics>
  </node>
  <node id="83648" label="ENSMUSG00000027420" cy:nodeId="412">
    <graphics z="0.0" y="344.1037609434389" x="425.7049972010817">
      <att name="lockedVisualProperties" type="list" cy:type="List">
        <att name="NODE_LABEL" value="" type="string" cy:type="String"/>
      </att>
    </graphics>
  </node>
  <node id="83649" label="ENSMUSG00000027469" cy:nodeId="413">
    <graphics z="0.0" y="115.99679200721226" x="547.414678439297">
      <att name="lockedVisualProperties" type="list" cy:type="List">
        <att name="NODE_LABEL" value="" type="string" cy:type="String"/>
      </att>
    </graphics>
  </node>
  <node id="83650" label="ENSMUSG00000024664" cy:nodeId="1437">
    <graphics z="0.0" y="271.95961520089946" x="147.30801159277593">
      <att name="lockedVisualProperties" type="list" cy:type="List">
        <att name="NODE_LABEL" value="" type="string" cy:type="String"/>
      </att>
    </graphics>
  </node>
  <node id="83651" label="ENSMUSG00000075602" cy:nodeId="2465">
    <graphics z="0.0" y="194.58653482447303" x="385.24273759634946">
      <att name="lockedVisualProperties" type="list" cy:type="List">
        <att name="NODE_LABEL" value="" type="string" cy:type="String"/>
      </att>
    </graphics>
  </node>
  <node id="83652" label="ENSMUSG00000027654" cy:nodeId="417">
    <graphics z="0.0" y="483.90153304597794" x="365.27856426324985">
      <att name="lockedVisualProperties" type="list" cy:type="List">
        <att name="NODE_LABEL" value="" type="string" cy:type="String"/>
      </att>
    </graphics>
  </node>
  <node id="83653" label="ENSMUSG00000027661" cy:nodeId="418">
    <graphics z="0.0" y="56.28047882727459" x="84.61622366127283">
      <att name="lockedVisualProperties" type="list" cy:type="List">
        <att name="NODE_LABEL" value="" type="string" cy:type="String"/>
      </att>
    </graphics>
  </node>
  <node id="83654" label="ENSMUSG00000027698" cy:nodeId="419">
    <graphics z="0.0" y="399.4792553380657" x="238.73434532619632">
      <att name="lockedVisualProperties" type="list" cy:type="List">
        <att name="NODE_LABEL" value="" type="string" cy:type="String"/>
      </att>
    </graphics>
  </node>
  <node id="83655" label="ENSMUSG00000027715" cy:nodeId="420">
    <graphics z="0.0" y="582.8757384407711" x="358.7381367929028">
      <att name="lockedVisualProperties" type="list" cy:type="List">
        <att name="NODE_LABEL" value="" type="string" cy:type="String"/>
      </att>
    </graphics>
  </node>
  <node id="83656" label="ENSMUSG00000024935" cy:nodeId="1450">
    <graphics z="0.0" y="388.4002506218029" x="91.6332521088659">
      <att name="lockedVisualProperties" type="list" cy:type="List">
        <att name="NODE_LABEL" value="" type="string" cy:type="String"/>
      </att>
    </graphics>
  </node>
  <node id="83657" label="ENSMUSG00000024960" cy:nodeId="1451">
    <graphics z="0.0" y="391.7956142211738" x="215.78585893115653">
      <att name="lockedVisualProperties" type="list" cy:type="List">
        <att name="NODE_LABEL" value="" type="string" cy:type="String"/>
      </att>
    </graphics>
  </node>
  <node id="83658" label="ENSMUSG00000028289" cy:nodeId="434">
    <graphics z="0.0" y="236.7233028357731" x="380.9328396529622">
      <att name="lockedVisualProperties" type="list" cy:type="List">
        <att name="NODE_LABEL" value="" type="string" cy:type="String"/>
      </att>
    </graphics>
  </node>
  <node id="83659" label="ENSMUSG00000025081" cy:nodeId="1459">
    <graphics z="0.0" y="233.38369700047934" x="532.9147847860626">
      <att name="lockedVisualProperties" type="list" cy:type="List">
        <att name="NODE_LABEL" value="" type="string" cy:type="String"/>
      </att>
    </graphics>
  </node>
  <node id="83660" label="ENSMUSG00000028312" cy:nodeId="435">
    <graphics z="0.0" y="622.5651168110194" x="226.64880841473277">
      <att name="lockedVisualProperties" type="list" cy:type="List">
        <att name="NODE_LABEL" value="" type="string" cy:type="String"/>
      </att>
    </graphics>
  </node>
  <node id="83661" label="ENSMUSG00000028435" cy:nodeId="437">
    <graphics z="0.0" y="26.798957875876482" x="70.24466647719703">
      <att name="lockedVisualProperties" type="list" cy:type="List">
        <att name="NODE_LABEL" value="" type="string" cy:type="String"/>
      </att>
    </graphics>
  </node>
  <node id="83662" label="ENSMUSG00000025150" cy:nodeId="1463">
    <graphics z="0.0" y="180.0254224651179" x="-19.433996687656546">
      <att name="lockedVisualProperties" type="list" cy:type="List">
        <att name="NODE_LABEL" value="" type="string" cy:type="String"/>
      </att>
    </graphics>
  </node>
  <node id="83663" label="ENSMUSG00000020651" cy:nodeId="2487">
    <graphics z="0.0" y="289.565642407055" x="-76.12681256370882">
      <att name="lockedVisualProperties" type="list" cy:type="List">
        <att name="NODE_LABEL" value="" type="string" cy:type="String"/>
      </att>
    </graphics>
  </node>
  <node id="83664" label="ENSMUSG00000025207" cy:nodeId="1472">
    <graphics z="0.0" y="0.22723817777628597" x="330.24923289684165">
      <att name="lockedVisualProperties" type="list" cy:type="List">
        <att name="NODE_LABEL" value="" type="string" cy:type="String"/>
      </att>
    </graphics>
  </node>
  <node id="83665" label="ENSMUSG00000028716" cy:nodeId="450">
    <graphics z="0.0" y="569.2094144711091" x="464.8464973040017">
      <att name="lockedVisualProperties" type="list" cy:type="List">
        <att name="NODE_LABEL" value="" type="string" cy:type="String"/>
      </att>
    </graphics>
  </node>
  <node id="83666" label="ENSMUSG00000028749" cy:nodeId="452">
    <graphics z="0.0" y="355.1593682294962" x="59.1589760307792">
      <att name="lockedVisualProperties" type="list" cy:type="List">
        <att name="NODE_LABEL" value="" type="string" cy:type="String"/>
      </att>
    </graphics>
  </node>
  <node id="83667" label="ENSMUSG00000028763" cy:nodeId="453">
    <graphics z="0.0" y="336.53109353217957" x="536.6800476191045">
      <att name="lockedVisualProperties" type="list" cy:type="List">
        <att name="NODE_LABEL" value="" type="string" cy:type="String"/>
      </att>
    </graphics>
  </node>
  <node id="83668" label="ENSMUSG00000025428" cy:nodeId="1479">
    <graphics z="0.0" y="127.05206580870338" x="-26.12561098511572">
      <att name="lockedVisualProperties" type="list" cy:type="List">
        <att name="NODE_LABEL" value="" type="string" cy:type="String"/>
      </att>
    </graphics>
  </node>
  <node id="83669" label="ENSMUSG00000028940" cy:nodeId="455">
    <graphics z="0.0" y="15.819220075075268" x="422.3467914921155">
      <att name="lockedVisualProperties" type="list" cy:type="List">
        <att name="NODE_LABEL" value="" type="string" cy:type="String"/>
      </att>
    </graphics>
  </node>
  <node id="83670" label="ENSMUSG00000029059" cy:nodeId="457">
    <graphics z="0.0" y="259.2460900438668" x="432.55979047729136">
      <att name="lockedVisualProperties" type="list" cy:type="List">
        <att name="NODE_LABEL" value="" type="string" cy:type="String"/>
      </att>
    </graphics>
  </node>
  <node id="83671" label="ENSMUSG00000025479" cy:nodeId="1483">
    <graphics z="0.0" y="393.6944220235056" x="-11.279028530870619">
      <att name="lockedVisualProperties" type="list" cy:type="List">
        <att name="NODE_LABEL" value="" type="string" cy:type="String"/>
      </att>
    </graphics>
  </node>
  <node id="83672" label="ENSMUSG00000029153" cy:nodeId="460">
    <graphics z="0.0" y="324.0380794702162" x="438.3421190298886">
      <att name="lockedVisualProperties" type="list" cy:type="List">
        <att name="NODE_LABEL" value="" type="string" cy:type="String"/>
      </att>
    </graphics>
  </node>
  <node id="83673" label="ENSMUSG00000029168" cy:nodeId="463">
    <graphics z="0.0" y="48.75188346604139" x="406.5045204647115">
      <att name="lockedVisualProperties" type="list" cy:type="List">
        <att name="NODE_LABEL" value="" type="string" cy:type="String"/>
      </att>
    </graphics>
  </node>
  <node id="83674" label="ENSMUSG00000025576" cy:nodeId="1487">
    <graphics z="0.0" y="19.334957448880623" x="352.4130546217876">
      <att name="lockedVisualProperties" type="list" cy:type="List">
        <att name="NODE_LABEL" value="" type="string" cy:type="String"/>
      </att>
    </graphics>
  </node>
  <node id="83675" label="ENSMUSG00000025652" cy:nodeId="1491">
    <graphics z="0.0" y="198.5223794046838" x="-0.5040517780277458">
      <att name="lockedVisualProperties" type="list" cy:type="List">
        <att name="NODE_LABEL" value="" type="string" cy:type="String"/>
      </att>
    </graphics>
  </node>
  <node id="83676" label="ENSMUSG00000025726" cy:nodeId="1492">
    <graphics z="0.0" y="32.015927177004215" x="44.23717391127971">
      <att name="lockedVisualProperties" type="list" cy:type="List">
        <att name="NODE_LABEL" value="" type="string" cy:type="String"/>
      </att>
    </graphics>
  </node>
  <node id="83677" label="ENSMUSG00000025779" cy:nodeId="1495">
    <graphics z="0.0" y="254.03822674290882" x="293.0087600554107">
      <att name="lockedVisualProperties" type="list" cy:type="List">
        <att name="NODE_LABEL" value="" type="string" cy:type="String"/>
      </att>
    </graphics>
  </node>
  <node id="83678" label="ENSMUSG00000029910" cy:nodeId="477">
    <graphics z="0.0" y="513.2240553597387" x="246.3940408482711">
      <att name="lockedVisualProperties" type="list" cy:type="List">
        <att name="NODE_LABEL" value="" type="string" cy:type="String"/>
      </att>
    </graphics>
  </node>
  <node id="83679" label="ENSMUSG00000030087" cy:nodeId="480">
    <graphics z="0.0" y="364.28505313551705" x="213.03608777444003">
      <att name="lockedVisualProperties" type="list" cy:type="List">
        <att name="NODE_LABEL" value="" type="string" cy:type="String"/>
      </att>
    </graphics>
  </node>
  <node id="83680" label="ENSMUSG00000030107" cy:nodeId="481">
    <graphics z="0.0" y="124.96348132187467" x="450.26981375088667">
      <att name="lockedVisualProperties" type="list" cy:type="List">
        <att name="NODE_LABEL" value="" type="string" cy:type="String"/>
      </att>
    </graphics>
  </node>
  <node id="83681" label="ENSMUSG00000030110" cy:nodeId="482">
    <graphics z="0.0" y="281.9802929051118" x="611.4749083009137">
      <att name="lockedVisualProperties" type="list" cy:type="List">
        <att name="NODE_LABEL" value="" type="string" cy:type="String"/>
      </att>
    </graphics>
  </node>
  <node id="83682" label="ENSMUSG00000030137" cy:nodeId="483">
    <graphics z="0.0" y="518.1065754197094" x="337.0316004034712">
      <att name="lockedVisualProperties" type="list" cy:type="List">
        <att name="NODE_LABEL" value="" type="string" cy:type="String"/>
      </att>
    </graphics>
  </node>
  <node id="83683" label="ENSMUSG00000030510" cy:nodeId="486">
    <graphics z="0.0" y="330.08729627550133" x="457.29717178776826">
      <att name="lockedVisualProperties" type="list" cy:type="List">
        <att name="NODE_LABEL" value="" type="string" cy:type="String"/>
      </att>
    </graphics>
  </node>
  <node id="83684" label="ENSMUSG00000030659" cy:nodeId="489">
    <graphics z="0.0" y="188.93005468443158" x="430.40998840346936">
      <att name="lockedVisualProperties" type="list" cy:type="List">
        <att name="NODE_LABEL" value="" type="string" cy:type="String"/>
      </att>
    </graphics>
  </node>
  <node id="83685" label="ENSMUSG00000026311" cy:nodeId="1515">
    <graphics z="0.0" y="430.6038515714535" x="196.03656535751531">
      <att name="lockedVisualProperties" type="list" cy:type="List">
        <att name="NODE_LABEL" value="" type="string" cy:type="String"/>
      </att>
    </graphics>
  </node>
  <node id="83686" label="ENSMUSG00000026321" cy:nodeId="1516">
    <graphics z="0.0" y="202.26928339476927" x="18.159115677001125">
      <att name="lockedVisualProperties" type="list" cy:type="List">
        <att name="NODE_LABEL" value="" type="string" cy:type="String"/>
      </att>
    </graphics>
  </node>
  <node id="83687" label="ENSMUSG00000026380" cy:nodeId="1519">
    <graphics z="0.0" y="493.2627556342445" x="-57.27606952997046">
      <att name="lockedVisualProperties" type="list" cy:type="List">
        <att name="NODE_LABEL" value="" type="string" cy:type="String"/>
      </att>
    </graphics>
  </node>
  <node id="83688" label="ENSMUSG00000026417" cy:nodeId="1524">
    <graphics z="0.0" y="-35.79248681597146" x="226.08759515335998">
      <att name="lockedVisualProperties" type="list" cy:type="List">
        <att name="NODE_LABEL" value="" type="string" cy:type="String"/>
      </att>
    </graphics>
  </node>
  <node id="83689" label="ENSMUSG00000031353" cy:nodeId="501">
    <graphics z="0.0" y="358.4360521523687" x="255.84861743984226">
      <att name="lockedVisualProperties" type="list" cy:type="List">
        <att name="NODE_LABEL" value="" type="string" cy:type="String"/>
      </att>
    </graphics>
  </node>
  <node id="83690" label="ENSMUSG00000026479" cy:nodeId="1528">
    <graphics z="0.0" y="518.8006607703346" x="99.66254993264513">
      <att name="lockedVisualProperties" type="list" cy:type="List">
        <att name="NODE_LABEL" value="" type="string" cy:type="String"/>
      </att>
    </graphics>
  </node>
  <node id="83691" label="ENSMUSG00000031562" cy:nodeId="508">
    <graphics z="0.0" y="174.0170157194379" x="503.35773971646404">
      <att name="lockedVisualProperties" type="list" cy:type="List">
        <att name="NODE_LABEL" value="" type="string" cy:type="String"/>
      </att>
    </graphics>
  </node>
  <node id="83692" label="ENSMUSG00000026586" cy:nodeId="1532">
    <graphics z="0.0" y="393.2784347501594" x="126.14232036545636">
      <att name="lockedVisualProperties" type="list" cy:type="List">
        <att name="NODE_LABEL" value="" type="string" cy:type="String"/>
      </att>
    </graphics>
  </node>
  <node id="83693" label="ENSMUSG00000031586" cy:nodeId="509">
    <graphics z="0.0" y="406.23890776268297" x="431.04179142520445">
      <att name="lockedVisualProperties" type="list" cy:type="List">
        <att name="NODE_LABEL" value="" type="string" cy:type="String"/>
      </att>
    </graphics>
  </node>
  <node id="83694" label="ENSMUSG00000031626" cy:nodeId="511">
    <graphics z="0.0" y="331.9831144458779" x="632.9958025810262">
      <att name="lockedVisualProperties" type="list" cy:type="List">
        <att name="NODE_LABEL" value="" type="string" cy:type="String"/>
      </att>
    </graphics>
  </node>
  <node id="83695" label="ENSMUSG00000026688" cy:nodeId="1536">
    <graphics z="0.0" y="328.3837151828757" x="560.6389416001125">
      <att name="lockedVisualProperties" type="list" cy:type="List">
        <att name="NODE_LABEL" value="" type="string" cy:type="String"/>
      </att>
    </graphics>
  </node>
  <node id="83696" label="ENSMUSG00000026785" cy:nodeId="1540">
    <graphics z="0.0" y="23.88701093090268" x="102.04613128932168">
      <att name="lockedVisualProperties" type="list" cy:type="List">
        <att name="NODE_LABEL" value="" type="string" cy:type="String"/>
      </att>
    </graphics>
  </node>
  <node id="83697" label="ENSMUSG00000031790" cy:nodeId="517">
    <graphics z="0.0" y="355.61255682294336" x="349.01632027040193">
      <att name="lockedVisualProperties" type="list" cy:type="List">
        <att name="NODE_LABEL" value="" type="string" cy:type="String"/>
      </att>
    </graphics>
  </node>
  <node id="83698" label="ENSMUSG00000027074" cy:nodeId="1550">
    <graphics z="0.0" y="80.31458105494794" x="19.23935553400711">
      <att name="lockedVisualProperties" type="list" cy:type="List">
        <att name="NODE_LABEL" value="" type="string" cy:type="String"/>
      </att>
    </graphics>
  </node>
  <node id="83699" label="ENSMUSG00000032202" cy:nodeId="526">
    <graphics z="0.0" y="536.8917021803686" x="248.42187031100963">
      <att name="lockedVisualProperties" type="list" cy:type="List">
        <att name="NODE_LABEL" value="" type="string" cy:type="String"/>
      </att>
    </graphics>
  </node>
  <node id="83700" label="ENSMUSG00000027075" cy:nodeId="1551">
    <graphics z="0.0" y="415.33933419259427" x="150.86299001252425">
      <att name="lockedVisualProperties" type="list" cy:type="List">
        <att name="NODE_LABEL" value="" type="string" cy:type="String"/>
      </att>
    </graphics>
  </node>
  <node id="83701" label="ENSMUSG00000027175" cy:nodeId="1553">
    <graphics z="0.0" y="541.2748862907357" x="587.9490824296856">
      <att name="lockedVisualProperties" type="list" cy:type="List">
        <att name="NODE_LABEL" value="" type="string" cy:type="String"/>
      </att>
    </graphics>
  </node>
  <node id="83702" label="ENSMUSG00000027219" cy:nodeId="1555">
    <graphics z="0.0" y="-68.17398597621272" x="280.65006487792573">
      <att name="lockedVisualProperties" type="list" cy:type="List">
        <att name="NODE_LABEL" value="" type="string" cy:type="String"/>
      </att>
    </graphics>
  </node>
  <node id="83703" label="ENSMUSG00000032338" cy:nodeId="531">
    <graphics z="0.0" y="157.01496969362296" x="63.07256651952491">
      <att name="lockedVisualProperties" type="list" cy:type="List">
        <att name="NODE_LABEL" value="" type="string" cy:type="String"/>
      </att>
    </graphics>
  </node>
  <node id="83704" label="ENSMUSG00000032356" cy:nodeId="532">
    <graphics z="0.0" y="392.2323167070141" x="196.39295335353745">
      <att name="lockedVisualProperties" type="list" cy:type="List">
        <att name="NODE_LABEL" value="" type="string" cy:type="String"/>
      </att>
    </graphics>
  </node>
  <node id="83705" label="ENSMUSG00000032358" cy:nodeId="533">
    <graphics z="0.0" y="120.19319387752566" x="105.94676652893644">
      <att name="lockedVisualProperties" type="list" cy:type="List">
        <att name="NODE_LABEL" value="" type="string" cy:type="String"/>
      </att>
    </graphics>
  </node>
  <node id="83706" label="ENSMUSG00000032373" cy:nodeId="534">
    <graphics z="0.0" y="94.95085945469216" x="295.55471646241045">
      <att name="lockedVisualProperties" type="list" cy:type="List">
        <att name="NODE_LABEL" value="" type="string" cy:type="String"/>
      </att>
    </graphics>
  </node>
  <node id="83707" label="ENSMUSG00000027346" cy:nodeId="1561">
    <graphics z="0.0" y="502.8893472801051" x="132.12292487363263">
      <att name="lockedVisualProperties" type="list" cy:type="List">
        <att name="NODE_LABEL" value="" type="string" cy:type="String"/>
      </att>
    </graphics>
  </node>
  <node id="83708" label="ENSMUSG00000032531" cy:nodeId="539">
    <graphics z="0.0" y="321.73965383342886" x="173.3491959010392">
      <att name="lockedVisualProperties" type="list" cy:type="List">
        <att name="NODE_LABEL" value="" type="string" cy:type="String"/>
      </att>
    </graphics>
  </node>
  <node id="83709" label="ENSMUSG00000032666" cy:nodeId="542">
    <graphics z="0.0" y="247.21879530454905" x="528.061000152261">
      <att name="lockedVisualProperties" type="list" cy:type="List">
        <att name="NODE_LABEL" value="" type="string" cy:type="String"/>
      </att>
    </graphics>
  </node>
  <node id="83710" label="ENSMUSG00000027438" cy:nodeId="1568">
    <graphics z="0.0" y="446.816588244254" x="245.63943422088101">
      <att name="lockedVisualProperties" type="list" cy:type="List">
        <att name="NODE_LABEL" value="" type="string" cy:type="String"/>
      </att>
    </graphics>
  </node>
  <node id="83711" label="ENSMUSG00000027447" cy:nodeId="1569">
    <graphics z="0.0" y="330.5823650263553" x="188.5834040426975">
      <att name="lockedVisualProperties" type="list" cy:type="List">
        <att name="NODE_LABEL" value="" type="string" cy:type="String"/>
      </att>
    </graphics>
  </node>
  <node id="83712" label="ENSMUSG00000027611" cy:nodeId="1573">
    <graphics z="0.0" y="-33.21840226164098" x="353.31777190138115">
      <att name="lockedVisualProperties" type="list" cy:type="List">
        <att name="NODE_LABEL" value="" type="string" cy:type="String"/>
      </att>
    </graphics>
  </node>
  <node id="83713" label="ENSMUSG00000032883" cy:nodeId="550">
    <graphics z="0.0" y="41.84319794971979" x="338.0623561318927">
      <att name="lockedVisualProperties" type="list" cy:type="List">
        <att name="NODE_LABEL" value="" type="string" cy:type="String"/>
      </att>
    </graphics>
  </node>
  <node id="83714" label="ENSMUSG00000032965" cy:nodeId="551">
    <graphics z="0.0" y="73.93616454657817" x="167.4676134105422">
      <att name="lockedVisualProperties" type="list" cy:type="List">
        <att name="NODE_LABEL" value="" type="string" cy:type="String"/>
      </att>
    </graphics>
  </node>
  <node id="83715" label="ENSMUSG00000033705" cy:nodeId="565">
    <graphics z="0.0" y="257.75811243597263" x="142.8457864896368">
      <att name="lockedVisualProperties" type="list" cy:type="List">
        <att name="NODE_LABEL" value="" type="string" cy:type="String"/>
      </att>
    </graphics>
  </node>
  <node id="83716" label="ENSMUSG00000033717" cy:nodeId="566">
    <graphics z="0.0" y="286.0675290775152" x="383.61891283710565">
      <att name="lockedVisualProperties" type="list" cy:type="List">
        <att name="NODE_LABEL" value="" type="string" cy:type="String"/>
      </att>
    </graphics>
  </node>
  <node id="83717" label="ENSMUSG00000028024" cy:nodeId="1591">
    <graphics z="0.0" y="104.6052767221116" x="-33.75061498898618">
      <att name="lockedVisualProperties" type="list" cy:type="List">
        <att name="NODE_LABEL" value="" type="string" cy:type="String"/>
      </att>
    </graphics>
  </node>
  <node id="83718" label="ENSMUSG00000033900" cy:nodeId="569">
    <graphics z="0.0" y="425.13943136054843" x="311.1106030508551">
      <att name="lockedVisualProperties" type="list" cy:type="List">
        <att name="NODE_LABEL" value="" type="string" cy:type="String"/>
      </att>
    </graphics>
  </node>
  <node id="83719" label="ENSMUSG00000033952" cy:nodeId="570">
    <graphics z="0.0" y="-17.162009371705086" x="245.7220311358188">
      <att name="lockedVisualProperties" type="list" cy:type="List">
        <att name="NODE_LABEL" value="" type="string" cy:type="String"/>
      </att>
    </graphics>
  </node>
  <node id="83720" label="ENSMUSG00000034006" cy:nodeId="571">
    <graphics z="0.0" y="61.56932182940098" x="242.09107852950484">
      <att name="lockedVisualProperties" type="list" cy:type="List">
        <att name="NODE_LABEL" value="" type="string" cy:type="String"/>
      </att>
    </graphics>
  </node>
  <node id="83721" label="ENSMUSG00000034227" cy:nodeId="573">
    <graphics z="0.0" y="531.9817020335153" x="46.8212671125861">
      <att name="lockedVisualProperties" type="list" cy:type="List">
        <att name="NODE_LABEL" value="" type="string" cy:type="String"/>
      </att>
    </graphics>
  </node>
  <node id="83722" label="ENSMUSG00000034285" cy:nodeId="575">
    <graphics z="0.0" y="525.7886846071551" x="35.51591231010465">
      <att name="lockedVisualProperties" type="list" cy:type="List">
        <att name="NODE_LABEL" value="" type="string" cy:type="String"/>
      </att>
    </graphics>
  </node>
  <node id="83723" label="ENSMUSG00000034573" cy:nodeId="579">
    <graphics z="0.0" y="103.3145864782764" x="53.82743189233209">
      <att name="lockedVisualProperties" type="list" cy:type="List">
        <att name="NODE_LABEL" value="" type="string" cy:type="String"/>
      </att>
    </graphics>
  </node>
  <node id="83724" label="ENSMUSG00000028223" cy:nodeId="1605">
    <graphics z="0.0" y="62.77950341921044" x="543.5012451182278">
      <att name="lockedVisualProperties" type="list" cy:type="List">
        <att name="NODE_LABEL" value="" type="string" cy:type="String"/>
      </att>
    </graphics>
  </node>
  <node id="83725" label="ENSMUSG00000035095" cy:nodeId="585">
    <graphics z="0.0" y="377.513004560255" x="29.97200908221909">
      <att name="lockedVisualProperties" type="list" cy:type="List">
        <att name="NODE_LABEL" value="" type="string" cy:type="String"/>
      </att>
    </graphics>
  </node>
  <node id="83726" label="ENSMUSG00000028518" cy:nodeId="1612">
    <graphics z="0.0" y="461.5784924617258" x="315.4623394279816">
      <att name="lockedVisualProperties" type="list" cy:type="List">
        <att name="NODE_LABEL" value="" type="string" cy:type="String"/>
      </att>
    </graphics>
  </node>
  <node id="83727" label="ENSMUSG00000035181" cy:nodeId="589">
    <graphics z="0.0" y="89.37753340318133" x="332.6453484542299">
      <att name="lockedVisualProperties" type="list" cy:type="List">
        <att name="NODE_LABEL" value="" type="string" cy:type="String"/>
      </att>
    </graphics>
  </node>
  <node id="83728" label="ENSMUSG00000035235" cy:nodeId="590">
    <graphics z="0.0" y="146.17830087243792" x="201.111509713575">
      <att name="lockedVisualProperties" type="list" cy:type="List">
        <att name="NODE_LABEL" value="" type="string" cy:type="String"/>
      </att>
    </graphics>
  </node>
  <node id="83729" label="ENSMUSG00000035431" cy:nodeId="593">
    <graphics z="0.0" y="299.46541854278405" x="641.314560835098">
      <att name="lockedVisualProperties" type="list" cy:type="List">
        <att name="NODE_LABEL" value="" type="string" cy:type="String"/>
      </att>
    </graphics>
  </node>
  <node id="83730" label="ENSMUSG00000035504" cy:nodeId="595">
    <graphics z="0.0" y="406.0323540354247" x="98.57491384251702">
      <att name="lockedVisualProperties" type="list" cy:type="List">
        <att name="NODE_LABEL" value="" type="string" cy:type="String"/>
      </att>
    </graphics>
  </node>
  <node id="83731" label="ENSMUSG00000035506" cy:nodeId="596">
    <graphics z="0.0" y="42.971849770539336" x="178.85092617823156">
      <att name="lockedVisualProperties" type="list" cy:type="List">
        <att name="NODE_LABEL" value="" type="string" cy:type="String"/>
      </att>
    </graphics>
  </node>
  <node id="83732" label="ENSMUSG00000035849" cy:nodeId="600">
    <graphics z="0.0" y="584.4441243254258" x="170.25064093428907">
      <att name="lockedVisualProperties" type="list" cy:type="List">
        <att name="NODE_LABEL" value="" type="string" cy:type="String"/>
      </att>
    </graphics>
  </node>
  <node id="83733" label="ENSMUSG00000028986" cy:nodeId="1626">
    <graphics z="0.0" y="-87.75621170937188" x="354.3594811916588">
      <att name="lockedVisualProperties" type="list" cy:type="List">
        <att name="NODE_LABEL" value="" type="string" cy:type="String"/>
      </att>
    </graphics>
  </node>
  <node id="83734" label="ENSMUSG00000029121" cy:nodeId="1629">
    <graphics z="0.0" y="527.3602229262067" x="325.52223429283185">
      <att name="lockedVisualProperties" type="list" cy:type="List">
        <att name="NODE_LABEL" value="" type="string" cy:type="String"/>
      </att>
    </graphics>
  </node>
  <node id="83735" label="ENSMUSG00000036599" cy:nodeId="605">
    <graphics z="0.0" y="95.334234705464" x="128.26251144667432">
      <att name="lockedVisualProperties" type="list" cy:type="List">
        <att name="NODE_LABEL" value="" type="string" cy:type="String"/>
      </att>
    </graphics>
  </node>
  <node id="83736" label="ENSMUSG00000036667" cy:nodeId="606">
    <graphics z="0.0" y="-51.14226911273339" x="187.8224538768306">
      <att name="lockedVisualProperties" type="list" cy:type="List">
        <att name="NODE_LABEL" value="" type="string" cy:type="String"/>
      </att>
    </graphics>
  </node>
  <node id="83737" label="ENSMUSG00000036745" cy:nodeId="607">
    <graphics z="0.0" y="182.53683873572453" x="208.36691323156558">
      <att name="lockedVisualProperties" type="list" cy:type="List">
        <att name="NODE_LABEL" value="" type="string" cy:type="String"/>
      </att>
    </graphics>
  </node>
  <node id="83738" label="ENSMUSG00000036832" cy:nodeId="608">
    <graphics z="0.0" y="443.1985814713511" x="33.021157543794416">
      <att name="lockedVisualProperties" type="list" cy:type="List">
        <att name="NODE_LABEL" value="" type="string" cy:type="String"/>
      </att>
    </graphics>
  </node>
  <node id="83739" label="ENSMUSG00000029245" cy:nodeId="1637">
    <graphics z="0.0" y="63.45554152843361" x="525.1204396556611">
      <att name="lockedVisualProperties" type="list" cy:type="List">
        <att name="NODE_LABEL" value="" type="string" cy:type="String"/>
      </att>
    </graphics>
  </node>
  <node id="83740" label="ENSMUSG00000037005" cy:nodeId="615">
    <graphics z="0.0" y="299.5186843141164" x="363.59715485367707">
      <att name="lockedVisualProperties" type="list" cy:type="List">
        <att name="NODE_LABEL" value="" type="string" cy:type="String"/>
      </att>
    </graphics>
  </node>
  <node id="83741" label="ENSMUSG00000029380" cy:nodeId="1645">
    <graphics z="0.0" y="27.325415716016206" x="219.57092423377918">
      <att name="lockedVisualProperties" type="list" cy:type="List">
        <att name="NODE_LABEL" value="" type="string" cy:type="String"/>
      </att>
    </graphics>
  </node>
  <node id="83742" label="ENSMUSG00000037440" cy:nodeId="624">
    <graphics z="0.0" y="451.65156240388524" x="433.7753276573127">
      <att name="lockedVisualProperties" type="list" cy:type="List">
        <att name="NODE_LABEL" value="" type="string" cy:type="String"/>
      </att>
    </graphics>
  </node>
  <node id="83743" label="ENSMUSG00000029436" cy:nodeId="1650">
    <graphics z="0.0" y="355.73285973158704" x="492.96421528321264">
      <att name="lockedVisualProperties" type="list" cy:type="List">
        <att name="NODE_LABEL" value="" type="string" cy:type="String"/>
      </att>
    </graphics>
  </node>
  <node id="83744" label="ENSMUSG00000037628" cy:nodeId="632">
    <graphics z="0.0" y="510.1809076476011" x="181.98835483417358">
      <att name="lockedVisualProperties" type="list" cy:type="List">
        <att name="NODE_LABEL" value="" type="string" cy:type="String"/>
      </att>
    </graphics>
  </node>
  <node id="83745" label="ENSMUSG00000037686" cy:nodeId="635">
    <graphics z="0.0" y="233.33076337097813" x="464.2130999484266">
      <att name="lockedVisualProperties" type="list" cy:type="List">
        <att name="NODE_LABEL" value="" type="string" cy:type="String"/>
      </att>
    </graphics>
  </node>
  <node id="83746" label="ENSMUSG00000085017" cy:nodeId="2684">
    <graphics z="0.0" y="463.1095697831779" x="-85.47282850530945">
      <att name="lockedVisualProperties" type="list" cy:type="List">
        <att name="NODE_LABEL" value="" type="string" cy:type="String"/>
      </att>
    </graphics>
  </node>
  <node id="83747" label="ENSMUSG00000037712" cy:nodeId="636">
    <graphics z="0.0" y="212.11524533499454" x="121.81880635704414">
      <att name="lockedVisualProperties" type="list" cy:type="List">
        <att name="NODE_LABEL" value="" type="string" cy:type="String"/>
      </att>
    </graphics>
  </node>
  <node id="83748" label="ENSMUSG00000097281" cy:nodeId="2686">
    <graphics z="0.0" y="553.787019899802" x="-4.100560834533603">
      <att name="lockedVisualProperties" type="list" cy:type="List">
        <att name="NODE_LABEL" value="" type="string" cy:type="String"/>
      </att>
    </graphics>
  </node>
  <node id="83749" label="ENSMUSG00000029762" cy:nodeId="1663">
    <graphics z="0.0" y="128.68133112252661" x="434.39705590750555">
      <att name="lockedVisualProperties" type="list" cy:type="List">
        <att name="NODE_LABEL" value="" type="string" cy:type="String"/>
      </att>
    </graphics>
  </node>
  <node id="83750" label="ENSMUSG00000037855" cy:nodeId="640">
    <graphics z="0.0" y="349.37352666293884" x="289.23154616973585">
      <att name="lockedVisualProperties" type="list" cy:type="List">
        <att name="NODE_LABEL" value="" type="string" cy:type="String"/>
      </att>
    </graphics>
  </node>
  <node id="83751" label="ENSMUSG00000029811" cy:nodeId="1666">
    <graphics z="0.0" y="28.322998634301186" x="-43.87663445763805">
      <att name="lockedVisualProperties" type="list" cy:type="List">
        <att name="NODE_LABEL" value="" type="string" cy:type="String"/>
      </att>
    </graphics>
  </node>
  <node id="83752" label="ENSMUSG00000029875" cy:nodeId="1669">
    <graphics z="0.0" y="607.9555116563437" x="111.82298104928117">
      <att name="lockedVisualProperties" type="list" cy:type="List">
        <att name="NODE_LABEL" value="" type="string" cy:type="String"/>
      </att>
    </graphics>
  </node>
  <node id="83753" label="ENSMUSG00000038319" cy:nodeId="647">
    <graphics z="0.0" y="58.75571043045511" x="83.79849694032876">
      <att name="lockedVisualProperties" type="list" cy:type="List">
        <att name="NODE_LABEL" value="" type="string" cy:type="String"/>
      </att>
    </graphics>
  </node>
  <node id="83754" label="ENSMUSG00000085126" cy:nodeId="2700">
    <graphics z="0.0" y="219.20193864783093" x="133.7308141740678">
      <att name="lockedVisualProperties" type="list" cy:type="List">
        <att name="NODE_LABEL" value="" type="string" cy:type="String"/>
      </att>
    </graphics>
  </node>
  <node id="83755" label="ENSMUSG00000038456" cy:nodeId="652">
    <graphics z="0.0" y="176.0486628144748" x="166.15661526613175">
      <att name="lockedVisualProperties" type="list" cy:type="List">
        <att name="NODE_LABEL" value="" type="string" cy:type="String"/>
      </att>
    </graphics>
  </node>
  <node id="83756" label="ENSMUSG00000038644" cy:nodeId="656">
    <graphics z="0.0" y="455.8054711197692" x="164.45346517389976">
      <att name="lockedVisualProperties" type="list" cy:type="List">
        <att name="NODE_LABEL" value="" type="string" cy:type="String"/>
      </att>
    </graphics>
  </node>
  <node id="83757" label="ENSMUSG00000038984" cy:nodeId="660">
    <graphics z="0.0" y="13.038477441047474" x="213.52556714745717">
      <att name="lockedVisualProperties" type="list" cy:type="List">
        <att name="NODE_LABEL" value="" type="string" cy:type="String"/>
      </att>
    </graphics>
  </node>
  <node id="83758" label="ENSMUSG00000039004" cy:nodeId="661">
    <graphics z="0.0" y="-57.22532974430679" x="441.09491814255085">
      <att name="lockedVisualProperties" type="list" cy:type="List">
        <att name="NODE_LABEL" value="" type="string" cy:type="String"/>
      </att>
    </graphics>
  </node>
  <node id="83759" label="ENSMUSG00000108356" cy:nodeId="2711">
    <graphics z="0.0" y="472.2922979834778" x="97.69748720271218">
      <att name="lockedVisualProperties" type="list" cy:type="List">
        <att name="NODE_LABEL" value="" type="string" cy:type="String"/>
      </att>
    </graphics>
  </node>
  <node id="83760" label="ENSMUSG00000039059" cy:nodeId="664">
    <graphics z="0.0" y="29.384541798973963" x="305.47717564162645">
      <att name="lockedVisualProperties" type="list" cy:type="List">
        <att name="NODE_LABEL" value="" type="string" cy:type="String"/>
      </att>
    </graphics>
  </node>
  <node id="83761" label="ENSMUSG00000097797" cy:nodeId="2713">
    <graphics z="0.0" y="-56.39588215000026" x="272.49184925847425">
      <att name="lockedVisualProperties" type="list" cy:type="List">
        <att name="NODE_LABEL" value="" type="string" cy:type="String"/>
      </att>
    </graphics>
  </node>
  <node id="83762" label="ENSMUSG00000107689" cy:nodeId="2714">
    <graphics z="0.0" y="292.0579982231648" x="409.410750533567">
      <att name="lockedVisualProperties" type="list" cy:type="List">
        <att name="NODE_LABEL" value="" type="string" cy:type="String"/>
      </att>
    </graphics>
  </node>
  <node id="83763" label="ENSMUSG00000039168" cy:nodeId="668">
    <graphics z="0.0" y="379.5540380589458" x="270.5229741190525">
      <att name="lockedVisualProperties" type="list" cy:type="List">
        <att name="NODE_LABEL" value="" type="string" cy:type="String"/>
      </att>
    </graphics>
  </node>
  <node id="83764" label="ENSMUSG00000039270" cy:nodeId="669">
    <graphics z="0.0" y="212.93255737346865" x="108.93616753280149">
      <att name="lockedVisualProperties" type="list" cy:type="List">
        <att name="NODE_LABEL" value="" type="string" cy:type="String"/>
      </att>
    </graphics>
  </node>
  <node id="83765" label="ENSMUSG00000039304" cy:nodeId="670">
    <graphics z="0.0" y="503.77444898414143" x="279.48010986734363">
      <att name="lockedVisualProperties" type="list" cy:type="List">
        <att name="NODE_LABEL" value="" type="string" cy:type="String"/>
      </att>
    </graphics>
  </node>
  <node id="83766" label="ENSMUSG00000039396" cy:nodeId="671">
    <graphics z="0.0" y="90.62334425661837" x="230.79678117860908">
      <att name="lockedVisualProperties" type="list" cy:type="List">
        <att name="NODE_LABEL" value="" type="string" cy:type="String"/>
      </att>
    </graphics>
  </node>
  <node id="83767" label="ENSMUSG00000108961" cy:nodeId="2719">
    <graphics z="0.0" y="40.71677628779804" x="268.238031818854">
      <att name="lockedVisualProperties" type="list" cy:type="List">
        <att name="NODE_LABEL" value="" type="string" cy:type="String"/>
      </att>
    </graphics>
  </node>
  <node id="83768" label="ENSMUSG00000039740" cy:nodeId="674">
    <graphics z="0.0" y="21.01540936562798" x="75.4285970694756">
      <att name="lockedVisualProperties" type="list" cy:type="List">
        <att name="NODE_LABEL" value="" type="string" cy:type="String"/>
      </att>
    </graphics>
  </node>
  <node id="83769" label="ENSMUSG00000110697" cy:nodeId="2722">
    <graphics z="0.0" y="436.0603737818416" x="60.995927858708114">
      <att name="lockedVisualProperties" type="list" cy:type="List">
        <att name="NODE_LABEL" value="" type="string" cy:type="String"/>
      </att>
    </graphics>
  </node>
  <node id="83770" label="ENSMUSG00000039809" cy:nodeId="675">
    <graphics z="0.0" y="315.9545686083148" x="231.67496435068597">
      <att name="lockedVisualProperties" type="list" cy:type="List">
        <att name="NODE_LABEL" value="" type="string" cy:type="String"/>
      </att>
    </graphics>
  </node>
  <node id="83771" label="ENSMUSG00000039814" cy:nodeId="677">
    <graphics z="0.0" y="271.00312262286945" x="339.8855825209853">
      <att name="lockedVisualProperties" type="list" cy:type="List">
        <att name="NODE_LABEL" value="" type="string" cy:type="String"/>
      </att>
    </graphics>
  </node>
  <node id="83772" label="ENSMUSG00000111202" cy:nodeId="2726">
    <graphics z="0.0" y="394.6354915679488" x="-135.04886290501355">
      <att name="lockedVisualProperties" type="list" cy:type="List">
        <att name="NODE_LABEL" value="" type="string" cy:type="String"/>
      </att>
    </graphics>
  </node>
  <node id="83773" label="ENSMUSG00000040170" cy:nodeId="680">
    <graphics z="0.0" y="404.2568842358019" x="584.0405575148352">
      <att name="lockedVisualProperties" type="list" cy:type="List">
        <att name="NODE_LABEL" value="" type="string" cy:type="String"/>
      </att>
    </graphics>
  </node>
  <node id="83774" label="ENSMUSG00000040209" cy:nodeId="681">
    <graphics z="0.0" y="171.93809597012287" x="411.971598490635">
      <att name="lockedVisualProperties" type="list" cy:type="List">
        <att name="NODE_LABEL" value="" type="string" cy:type="String"/>
      </att>
    </graphics>
  </node>
  <node id="83775" label="ENSMUSG00000040276" cy:nodeId="682">
    <graphics z="0.0" y="-9.049196000564784" x="330.41143127823335">
      <att name="lockedVisualProperties" type="list" cy:type="List">
        <att name="NODE_LABEL" value="" type="string" cy:type="String"/>
      </att>
    </graphics>
  </node>
  <node id="83776" label="ENSMUSG00000102123" cy:nodeId="2731">
    <graphics z="0.0" y="533.1073643882276" x="337.9066322370351">
      <att name="lockedVisualProperties" type="list" cy:type="List">
        <att name="NODE_LABEL" value="" type="string" cy:type="String"/>
      </att>
    </graphics>
  </node>
  <node id="83777" label="ENSMUSG00000031327" cy:nodeId="1708">
    <graphics z="0.0" y="443.3079458011603" x="479.61676314017814">
      <att name="lockedVisualProperties" type="list" cy:type="List">
        <att name="NODE_LABEL" value="" type="string" cy:type="String"/>
      </att>
    </graphics>
  </node>
  <node id="83778" label="ENSMUSG00000031351" cy:nodeId="1709">
    <graphics z="0.0" y="-19.274083267259925" x="238.76302385982282">
      <att name="lockedVisualProperties" type="list" cy:type="List">
        <att name="NODE_LABEL" value="" type="string" cy:type="String"/>
      </att>
    </graphics>
  </node>
  <node id="83779" label="ENSMUSG00000097632" cy:nodeId="2734">
    <graphics z="0.0" y="248.38187125944216" x="-76.63449543815872">
      <att name="lockedVisualProperties" type="list" cy:type="List">
        <att name="NODE_LABEL" value="" type="string" cy:type="String"/>
      </att>
    </graphics>
  </node>
  <node id="83780" label="ENSMUSG00000031378" cy:nodeId="1713">
    <graphics z="0.0" y="461.50663675123747" x="83.32712564432585">
      <att name="lockedVisualProperties" type="list" cy:type="List">
        <att name="NODE_LABEL" value="" type="string" cy:type="String"/>
      </att>
    </graphics>
  </node>
  <node id="83781" label="ENSMUSG00000031444" cy:nodeId="1714">
    <graphics z="0.0" y="-53.04121991579185" x="500.2977129048393">
      <att name="lockedVisualProperties" type="list" cy:type="List">
        <att name="NODE_LABEL" value="" type="string" cy:type="String"/>
      </att>
    </graphics>
  </node>
  <node id="83782" label="ENSMUSG00000040495" cy:nodeId="690">
    <graphics z="0.0" y="103.78619644183811" x="493.76111284633515">
      <att name="lockedVisualProperties" type="list" cy:type="List">
        <att name="NODE_LABEL" value="" type="string" cy:type="String"/>
      </att>
    </graphics>
  </node>
  <node id="83783" label="ENSMUSG00000040663" cy:nodeId="692">
    <graphics z="0.0" y="521.2704548897593" x="356.70041588559235">
      <att name="lockedVisualProperties" type="list" cy:type="List">
        <att name="NODE_LABEL" value="" type="string" cy:type="String"/>
      </att>
    </graphics>
  </node>
  <node id="83784" label="ENSMUSG00000031448" cy:nodeId="1716">
    <graphics z="0.0" y="336.3529810689111" x="247.92429164281185">
      <att name="lockedVisualProperties" type="list" cy:type="List">
        <att name="NODE_LABEL" value="" type="string" cy:type="String"/>
      </att>
    </graphics>
  </node>
  <node id="83785" label="ENSMUSG00000040972" cy:nodeId="695">
    <graphics z="0.0" y="153.09937601757818" x="125.79871964468997">
      <att name="lockedVisualProperties" type="list" cy:type="List">
        <att name="NODE_LABEL" value="" type="string" cy:type="String"/>
      </att>
    </graphics>
  </node>
  <node id="83786" label="ENSMUSG00000031558" cy:nodeId="1722">
    <graphics z="0.0" y="-0.038078550677461465" x="482.2920209114241">
      <att name="lockedVisualProperties" type="list" cy:type="List">
        <att name="NODE_LABEL" value="" type="string" cy:type="String"/>
      </att>
    </graphics>
  </node>
  <node id="83787" label="ENSMUSG00000041096" cy:nodeId="701">
    <graphics z="0.0" y="358.0362845972451" x="418.35779980751573">
      <att name="lockedVisualProperties" type="list" cy:type="List">
        <att name="NODE_LABEL" value="" type="string" cy:type="String"/>
      </att>
    </graphics>
  </node>
  <node id="83788" label="ENSMUSG00000041120" cy:nodeId="702">
    <graphics z="0.0" y="116.30154555091286" x="283.89875153101593">
      <att name="lockedVisualProperties" type="list" cy:type="List">
        <att name="NODE_LABEL" value="" type="string" cy:type="String"/>
      </att>
    </graphics>
  </node>
  <node id="83789" label="ENSMUSG00000041126" cy:nodeId="703">
    <graphics z="0.0" y="52.82005098355768" x="173.6229696950641">
      <att name="lockedVisualProperties" type="list" cy:type="List">
        <att name="NODE_LABEL" value="" type="string" cy:type="String"/>
      </att>
    </graphics>
  </node>
  <node id="83790" label="ENSMUSG00000041193" cy:nodeId="705">
    <graphics z="0.0" y="286.06513842703004" x="24.519549266484212">
      <att name="lockedVisualProperties" type="list" cy:type="List">
        <att name="NODE_LABEL" value="" type="string" cy:type="String"/>
      </att>
    </graphics>
  </node>
  <node id="83791" label="ENSMUSG00000031785" cy:nodeId="1731">
    <graphics z="0.0" y="-141.3063348338868" x="398.5581674576836">
      <att name="lockedVisualProperties" type="list" cy:type="List">
        <att name="NODE_LABEL" value="" type="string" cy:type="String"/>
      </att>
    </graphics>
  </node>
  <node id="83792" label="ENSMUSG00000031833" cy:nodeId="1732">
    <graphics z="0.0" y="118.5906092965935" x="-14.480583503681906">
      <att name="lockedVisualProperties" type="list" cy:type="List">
        <att name="NODE_LABEL" value="" type="string" cy:type="String"/>
      </att>
    </graphics>
  </node>
  <node id="83793" label="ENSMUSG00000041570" cy:nodeId="710">
    <graphics z="0.0" y="262.5694621899081" x="207.63901852093113">
      <att name="lockedVisualProperties" type="list" cy:type="List">
        <att name="NODE_LABEL" value="" type="string" cy:type="String"/>
      </att>
    </graphics>
  </node>
  <node id="83794" label="ENSMUSG00000041609" cy:nodeId="711">
    <graphics z="0.0" y="529.9748260936509" x="375.8400648866808">
      <att name="lockedVisualProperties" type="list" cy:type="List">
        <att name="NODE_LABEL" value="" type="string" cy:type="String"/>
      </att>
    </graphics>
  </node>
  <node id="83795" label="ENSMUSG00000041889" cy:nodeId="714">
    <graphics z="0.0" y="619.4917380612629" x="247.12055772192497">
      <att name="lockedVisualProperties" type="list" cy:type="List">
        <att name="NODE_LABEL" value="" type="string" cy:type="String"/>
      </att>
    </graphics>
  </node>
  <node id="83796" label="ENSMUSG00000031902" cy:nodeId="1740">
    <graphics z="0.0" y="12.651295754063469" x="130.88538481985924">
      <att name="lockedVisualProperties" type="list" cy:type="List">
        <att name="NODE_LABEL" value="" type="string" cy:type="String"/>
      </att>
    </graphics>
  </node>
  <node id="83797" label="ENSMUSG00000042099" cy:nodeId="719">
    <graphics z="0.0" y="172.33299367913983" x="443.2414590689048">
      <att name="lockedVisualProperties" type="list" cy:type="List">
        <att name="NODE_LABEL" value="" type="string" cy:type="String"/>
      </att>
    </graphics>
  </node>
  <node id="83798" label="ENSMUSG00000042306" cy:nodeId="725">
    <graphics z="0.0" y="325.9518936125745" x="481.35567744420797">
      <att name="lockedVisualProperties" type="list" cy:type="List">
        <att name="NODE_LABEL" value="" type="string" cy:type="String"/>
      </att>
    </graphics>
  </node>
  <node id="83799" label="ENSMUSG00000032083" cy:nodeId="1751">
    <graphics z="0.0" y="-115.90189965422277" x="170.49329917233493">
      <att name="lockedVisualProperties" type="list" cy:type="List">
        <att name="NODE_LABEL" value="" type="string" cy:type="String"/>
      </att>
    </graphics>
  </node>
  <node id="83800" label="ENSMUSG00000042359" cy:nodeId="727">
    <graphics z="0.0" y="504.13760877198104" x="14.743275025734892">
      <att name="lockedVisualProperties" type="list" cy:type="List">
        <att name="NODE_LABEL" value="" type="string" cy:type="String"/>
      </att>
    </graphics>
  </node>
  <node id="83801" label="ENSMUSG00000042429" cy:nodeId="728">
    <graphics z="0.0" y="69.98672375947824" x="321.85694956627526">
      <att name="lockedVisualProperties" type="list" cy:type="List">
        <att name="NODE_LABEL" value="" type="string" cy:type="String"/>
      </att>
    </graphics>
  </node>
  <node id="83802" label="ENSMUSG00000042564" cy:nodeId="729">
    <graphics z="0.0" y="343.8395013530803" x="103.94692765692152">
      <att name="lockedVisualProperties" type="list" cy:type="List">
        <att name="NODE_LABEL" value="" type="string" cy:type="String"/>
      </att>
    </graphics>
  </node>
  <node id="83803" label="ENSMUSG00000032092" cy:nodeId="1753">
    <graphics z="0.0" y="160.05309178012888" x="-152.36512901097456">
      <att name="lockedVisualProperties" type="list" cy:type="List">
        <att name="NODE_LABEL" value="" type="string" cy:type="String"/>
      </att>
    </graphics>
  </node>
  <node id="83804" label="ENSMUSG00000042734" cy:nodeId="732">
    <graphics z="0.0" y="192.25731415052772" x="378.14585719626587">
      <att name="lockedVisualProperties" type="list" cy:type="List">
        <att name="NODE_LABEL" value="" type="string" cy:type="String"/>
      </att>
    </graphics>
  </node>
  <node id="83805" label="ENSMUSG00000042763" cy:nodeId="733">
    <graphics z="0.0" y="391.51961154355564" x="615.8163248676177">
      <att name="lockedVisualProperties" type="list" cy:type="List">
        <att name="NODE_LABEL" value="" type="string" cy:type="String"/>
      </att>
    </graphics>
  </node>
  <node id="83806" label="ENSMUSG00000032251" cy:nodeId="1758">
    <graphics z="0.0" y="496.72432851758464" x="-30.713921776491382">
      <att name="lockedVisualProperties" type="list" cy:type="List">
        <att name="NODE_LABEL" value="" type="string" cy:type="String"/>
      </att>
    </graphics>
  </node>
  <node id="83807" label="ENSMUSG00000043154" cy:nodeId="735">
    <graphics z="0.0" y="369.99749853838375" x="458.55810717264546">
      <att name="lockedVisualProperties" type="list" cy:type="List">
        <att name="NODE_LABEL" value="" type="string" cy:type="String"/>
      </att>
    </graphics>
  </node>
  <node id="83808" label="ENSMUSG00000032285" cy:nodeId="1760">
    <graphics z="0.0" y="61.4045360321083" x="281.6607770443327">
      <att name="lockedVisualProperties" type="list" cy:type="List">
        <att name="NODE_LABEL" value="" type="string" cy:type="String"/>
      </att>
    </graphics>
  </node>
  <node id="83809" label="ENSMUSG00000032353" cy:nodeId="1764">
    <graphics z="0.0" y="584.5774497425487" x="421.45447699860364">
      <att name="lockedVisualProperties" type="list" cy:type="List">
        <att name="NODE_LABEL" value="" type="string" cy:type="String"/>
      </att>
    </graphics>
  </node>
  <node id="83810" label="ENSMUSG00000044548" cy:nodeId="746">
    <graphics z="0.0" y="201.3443655982704" x="460.9689108581997">
      <att name="lockedVisualProperties" type="list" cy:type="List">
        <att name="NODE_LABEL" value="" type="string" cy:type="String"/>
      </att>
    </graphics>
  </node>
  <node id="83811" label="ENSMUSG00000032454" cy:nodeId="1771">
    <graphics z="0.0" y="507.5058701895305" x="122.12335179282113">
      <att name="lockedVisualProperties" type="list" cy:type="List">
        <att name="NODE_LABEL" value="" type="string" cy:type="String"/>
      </att>
    </graphics>
  </node>
  <node id="83812" label="ENSMUSG00000045215" cy:nodeId="752">
    <graphics z="0.0" y="330.2632143006139" x="149.64717896081638">
      <att name="lockedVisualProperties" type="list" cy:type="List">
        <att name="NODE_LABEL" value="" type="string" cy:type="String"/>
      </att>
    </graphics>
  </node>
  <node id="83813" label="ENSMUSG00000045294" cy:nodeId="753">
    <graphics z="0.0" y="573.1123454809806" x="87.68611409229739">
      <att name="lockedVisualProperties" type="list" cy:type="List">
        <att name="NODE_LABEL" value="" type="string" cy:type="String"/>
      </att>
    </graphics>
  </node>
  <node id="83814" label="ENSMUSG00000032702" cy:nodeId="1779">
    <graphics z="0.0" y="214.26609504272005" x="-65.40688706607244">
      <att name="lockedVisualProperties" type="list" cy:type="List">
        <att name="NODE_LABEL" value="" type="string" cy:type="String"/>
      </att>
    </graphics>
  </node>
  <node id="83815" label="ENSMUSG00000045790" cy:nodeId="758">
    <graphics z="0.0" y="340.98665076848414" x="519.0499195080074">
      <att name="lockedVisualProperties" type="list" cy:type="List">
        <att name="NODE_LABEL" value="" type="string" cy:type="String"/>
      </att>
    </graphics>
  </node>
  <node id="83816" label="ENSMUSG00000045896" cy:nodeId="759">
    <graphics z="0.0" y="493.4444629361681" x="304.3785713327477">
      <att name="lockedVisualProperties" type="list" cy:type="List">
        <att name="NODE_LABEL" value="" type="string" cy:type="String"/>
      </att>
    </graphics>
  </node>
  <node id="83817" label="ENSMUSG00000046215" cy:nodeId="763">
    <graphics z="0.0" y="324.7327909598652" x="396.68260601290325">
      <att name="lockedVisualProperties" type="list" cy:type="List">
        <att name="NODE_LABEL" value="" type="string" cy:type="String"/>
      </att>
    </graphics>
  </node>
  <node id="83818" label="ENSMUSG00000046591" cy:nodeId="769">
    <graphics z="0.0" y="283.63150220298587" x="541.5764785885352">
      <att name="lockedVisualProperties" type="list" cy:type="List">
        <att name="NODE_LABEL" value="" type="string" cy:type="String"/>
      </att>
    </graphics>
  </node>
  <node id="83819" label="ENSMUSG00000046668" cy:nodeId="770">
    <graphics z="0.0" y="338.5344933354113" x="170.46119404046223">
      <att name="lockedVisualProperties" type="list" cy:type="List">
        <att name="NODE_LABEL" value="" type="string" cy:type="String"/>
      </att>
    </graphics>
  </node>
  <node id="83820" label="ENSMUSG00000033308" cy:nodeId="1796">
    <graphics z="0.0" y="51.17572377452248" x="-29.645234229189136">
      <att name="lockedVisualProperties" type="list" cy:type="List">
        <att name="NODE_LABEL" value="" type="string" cy:type="String"/>
      </att>
    </graphics>
  </node>
  <node id="83821" label="mmu-miR-20b-5p" cy:nodeId="2822">
    <graphics z="0.0" y="252.73525302757497" x="480.1240995251767">
      <att name="lockedVisualProperties" type="list" cy:type="List">
        <att name="NODE_LABEL" value="" type="string" cy:type="String"/>
      </att>
    </graphics>
  </node>
  <node id="83822" label="ENSMUSG00000047205" cy:nodeId="775">
    <graphics z="0.0" y="352.93236235302106" x="59.189574823549805">
      <att name="lockedVisualProperties" type="list" cy:type="List">
        <att name="NODE_LABEL" value="" type="string" cy:type="String"/>
      </att>
    </graphics>
  </node>
  <node id="83823" label="ENSMUSG00000033579" cy:nodeId="1800">
    <graphics z="0.0" y="-77.349969770395" x="398.08839036360575">
      <att name="lockedVisualProperties" type="list" cy:type="List">
        <att name="NODE_LABEL" value="" type="string" cy:type="String"/>
      </att>
    </graphics>
  </node>
  <node id="83824" label="ENSMUSG00000033581" cy:nodeId="1801">
    <graphics z="0.0" y="-29.50492729652656" x="3.440537079319727">
      <att name="lockedVisualProperties" type="list" cy:type="List">
        <att name="NODE_LABEL" value="" type="string" cy:type="String"/>
      </att>
    </graphics>
  </node>
  <node id="83825" label="ENSMUSG00000047747" cy:nodeId="779">
    <graphics z="0.0" y="309.0846538603174" x="104.92808281217872">
      <att name="lockedVisualProperties" type="list" cy:type="List">
        <att name="NODE_LABEL" value="" type="string" cy:type="String"/>
      </att>
    </graphics>
  </node>
  <node id="83826" label="mmu-miR-101a-3p" cy:nodeId="2830">
    <graphics z="0.0" y="200.91523907401196" x="332.42430076606934">
      <att name="lockedVisualProperties" type="list" cy:type="List">
        <att name="NODE_LABEL" value="" type="string" cy:type="String"/>
      </att>
    </graphics>
  </node>
  <node id="83827" label="ENSMUSG00000033684" cy:nodeId="1807">
    <graphics z="0.0" y="2.256880508189516" x="-43.83011776746179">
      <att name="lockedVisualProperties" type="list" cy:type="List">
        <att name="NODE_LABEL" value="" type="string" cy:type="String"/>
      </att>
    </graphics>
  </node>
  <node id="83828" label="ENSMUSG00000033825" cy:nodeId="1808">
    <graphics z="0.0" y="431.3747507706412" x="344.80128450055406">
      <att name="lockedVisualProperties" type="list" cy:type="List">
        <att name="NODE_LABEL" value="" type="string" cy:type="String"/>
      </att>
    </graphics>
  </node>
  <node id="83829" label="ENSMUSG00000048349" cy:nodeId="786">
    <graphics z="0.0" y="407.5200765259559" x="608.8454792219827">
      <att name="lockedVisualProperties" type="list" cy:type="List">
        <att name="NODE_LABEL" value="" type="string" cy:type="String"/>
      </att>
    </graphics>
  </node>
  <node id="83830" label="ENSMUSG00000034118" cy:nodeId="1813">
    <graphics z="0.0" y="-7.124088482045576" x="127.20273130733591">
      <att name="lockedVisualProperties" type="list" cy:type="List">
        <att name="NODE_LABEL" value="" type="string" cy:type="String"/>
      </att>
    </graphics>
  </node>
  <node id="83831" label="ENSMUSG00000034164" cy:nodeId="1814">
    <graphics z="0.0" y="244.10212904799886" x="12.110033413299583">
      <att name="lockedVisualProperties" type="list" cy:type="List">
        <att name="NODE_LABEL" value="" type="string" cy:type="String"/>
      </att>
    </graphics>
  </node>
  <node id="83832" label="ENSMUSG00000048965" cy:nodeId="793">
    <graphics z="0.0" y="365.0820079740687" x="334.18801794451264">
      <att name="lockedVisualProperties" type="list" cy:type="List">
        <att name="NODE_LABEL" value="" type="string" cy:type="String"/>
      </att>
    </graphics>
  </node>
  <node id="83833" label="ENSMUSG00000048970" cy:nodeId="794">
    <graphics z="0.0" y="347.48620356377677" x="99.82901923222438">
      <att name="lockedVisualProperties" type="list" cy:type="List">
        <att name="NODE_LABEL" value="" type="string" cy:type="String"/>
      </att>
    </graphics>
  </node>
  <node id="83834" label="ENSMUSG00000034528" cy:nodeId="1819">
    <graphics z="0.0" y="416.32115127680555" x="314.27740780781994">
      <att name="lockedVisualProperties" type="list" cy:type="List">
        <att name="NODE_LABEL" value="" type="string" cy:type="String"/>
      </att>
    </graphics>
  </node>
  <node id="83835" label="ENSMUSG00000034586" cy:nodeId="1820">
    <graphics z="0.0" y="443.85240939812815" x="451.90268136987567">
      <att name="lockedVisualProperties" type="list" cy:type="List">
        <att name="NODE_LABEL" value="" type="string" cy:type="String"/>
      </att>
    </graphics>
  </node>
  <node id="83836" label="ENSMUSG00000034648" cy:nodeId="1821">
    <graphics z="0.0" y="73.80830469695766" x="600.6547389271279">
      <att name="lockedVisualProperties" type="list" cy:type="List">
        <att name="NODE_LABEL" value="" type="string" cy:type="String"/>
      </att>
    </graphics>
  </node>
  <node id="83837" label="ENSMUSG00000049288" cy:nodeId="797">
    <graphics z="0.0" y="356.41781273329616" x="613.9472008157778">
      <att name="lockedVisualProperties" type="list" cy:type="List">
        <att name="NODE_LABEL" value="" type="string" cy:type="String"/>
      </att>
    </graphics>
  </node>
  <node id="83838" label="ENSMUSG00000034724" cy:nodeId="1826">
    <graphics z="0.0" y="57.66118069576217" x="468.1636452390548">
      <att name="lockedVisualProperties" type="list" cy:type="List">
        <att name="NODE_LABEL" value="" type="string" cy:type="String"/>
      </att>
    </graphics>
  </node>
  <node id="83839" label="ENSMUSG00000034825" cy:nodeId="1829">
    <graphics z="0.0" y="-30.61862357057304" x="125.56022454453499">
      <att name="lockedVisualProperties" type="list" cy:type="List">
        <att name="NODE_LABEL" value="" type="string" cy:type="String"/>
      </att>
    </graphics>
  </node>
  <node id="83840" label="ENSMUSG00000035109" cy:nodeId="1834">
    <graphics z="0.0" y="217.3535281667917" x="-78.72613784817821">
      <att name="lockedVisualProperties" type="list" cy:type="List">
        <att name="NODE_LABEL" value="" type="string" cy:type="String"/>
      </att>
    </graphics>
  </node>
  <node id="83841" label="ENSMUSG00000050323" cy:nodeId="810">
    <graphics z="0.0" y="-22.056386669736273" x="131.29692175772718">
      <att name="lockedVisualProperties" type="list" cy:type="List">
        <att name="NODE_LABEL" value="" type="string" cy:type="String"/>
      </att>
    </graphics>
  </node>
  <node id="83842" label="ENSMUSG00000050335" cy:nodeId="811">
    <graphics z="0.0" y="231.22655852219017" x="467.34266818980666">
      <att name="lockedVisualProperties" type="list" cy:type="List">
        <att name="NODE_LABEL" value="" type="string" cy:type="String"/>
      </att>
    </graphics>
  </node>
  <node id="83843" label="ENSMUSG00000035273" cy:nodeId="1837">
    <graphics z="0.0" y="-148.39082098443504" x="232.71915167339318">
      <att name="lockedVisualProperties" type="list" cy:type="List">
        <att name="NODE_LABEL" value="" type="string" cy:type="String"/>
      </att>
    </graphics>
  </node>
  <node id="83844" label="ENSMUSG00000050953" cy:nodeId="816">
    <graphics z="0.0" y="293.1436673855398" x="-1.1524571936865016">
      <att name="lockedVisualProperties" type="list" cy:type="List">
        <att name="NODE_LABEL" value="" type="string" cy:type="String"/>
      </att>
    </graphics>
  </node>
  <node id="83845" label="ENSMUSG00000035451" cy:nodeId="1840">
    <graphics z="0.0" y="227.9401039056668" x="204.56547302691615">
      <att name="lockedVisualProperties" type="list" cy:type="List">
        <att name="NODE_LABEL" value="" type="string" cy:type="String"/>
      </att>
    </graphics>
  </node>
  <node id="83846" label="ENSMUSG00000035473" cy:nodeId="1841">
    <graphics z="0.0" y="-16.3849983937932" x="31.31538960541272">
      <att name="lockedVisualProperties" type="list" cy:type="List">
        <att name="NODE_LABEL" value="" type="string" cy:type="String"/>
      </att>
    </graphics>
  </node>
  <node id="83847" label="ENSMUSG00000035637" cy:nodeId="1843">
    <graphics z="0.0" y="610.0068518608883" x="294.80417596699147">
      <att name="lockedVisualProperties" type="list" cy:type="List">
        <att name="NODE_LABEL" value="" type="string" cy:type="String"/>
      </att>
    </graphics>
  </node>
  <node id="83848" label="ENSMUSG00000051977" cy:nodeId="821">
    <graphics z="0.0" y="463.0488489375779" x="306.62665993973195">
      <att name="lockedVisualProperties" type="list" cy:type="List">
        <att name="NODE_LABEL" value="" type="string" cy:type="String"/>
      </att>
    </graphics>
  </node>
  <node id="83849" label="ENSMUSG00000035780" cy:nodeId="1846">
    <graphics z="0.0" y="-11.649295767967697" x="73.63269910861807">
      <att name="lockedVisualProperties" type="list" cy:type="List">
        <att name="NODE_LABEL" value="" type="string" cy:type="String"/>
      </att>
    </graphics>
  </node>
  <node id="83850" label="ENSMUSG00000051980" cy:nodeId="822">
    <graphics z="0.0" y="464.99698833583045" x="119.56564521759978">
      <att name="lockedVisualProperties" type="list" cy:type="List">
        <att name="NODE_LABEL" value="" type="string" cy:type="String"/>
      </att>
    </graphics>
  </node>
  <node id="83851" label="ENSMUSG00000052087" cy:nodeId="823">
    <graphics z="0.0" y="193.6187732684689" x="58.35900677514578">
      <att name="lockedVisualProperties" type="list" cy:type="List">
        <att name="NODE_LABEL" value="" type="string" cy:type="String"/>
      </att>
    </graphics>
  </node>
  <node id="83852" label="ENSMUSG00000052135" cy:nodeId="825">
    <graphics z="0.0" y="295.3683142057843" x="130.86140734009456">
      <att name="lockedVisualProperties" type="list" cy:type="List">
        <att name="NODE_LABEL" value="" type="string" cy:type="String"/>
      </att>
    </graphics>
  </node>
  <node id="83853" label="ENSMUSG00000052921" cy:nodeId="828">
    <graphics z="0.0" y="-67.23986565541033" x="226.28372616534875">
      <att name="lockedVisualProperties" type="list" cy:type="List">
        <att name="NODE_LABEL" value="" type="string" cy:type="String"/>
      </att>
    </graphics>
  </node>
  <node id="83854" label="ENSMUSG00000036053" cy:nodeId="1856">
    <graphics z="0.0" y="361.6919137135118" x="34.617273804004796">
      <att name="lockedVisualProperties" type="list" cy:type="List">
        <att name="NODE_LABEL" value="" type="string" cy:type="String"/>
      </att>
    </graphics>
  </node>
  <node id="83855" label="ENSMUSG00000053317" cy:nodeId="833">
    <graphics z="0.0" y="287.0079616554171" x="515.4392029975908">
      <att name="lockedVisualProperties" type="list" cy:type="List">
        <att name="NODE_LABEL" value="" type="string" cy:type="String"/>
      </att>
    </graphics>
  </node>
  <node id="83856" label="ENSMUSG00000036181" cy:nodeId="1859">
    <graphics z="0.0" y="96.79564405321325" x="114.77983289937353">
      <att name="lockedVisualProperties" type="list" cy:type="List">
        <att name="NODE_LABEL" value="" type="string" cy:type="String"/>
      </att>
    </graphics>
  </node>
  <node id="83857" label="ENSMUSG00000053768" cy:nodeId="840">
    <graphics z="0.0" y="263.4285725258936" x="290.07381390182104">
      <att name="lockedVisualProperties" type="list" cy:type="List">
        <att name="NODE_LABEL" value="" type="string" cy:type="String"/>
      </att>
    </graphics>
  </node>
  <node id="83858" label="ENSMUSG00000053783" cy:nodeId="841">
    <graphics z="0.0" y="502.21213007066655" x="134.0433557680653">
      <att name="lockedVisualProperties" type="list" cy:type="List">
        <att name="NODE_LABEL" value="" type="string" cy:type="String"/>
      </att>
    </graphics>
  </node>
  <node id="83859" label="ENSMUSG00000036306" cy:nodeId="1866">
    <graphics z="0.0" y="462.30652487795174" x="244.81931246292314">
      <att name="lockedVisualProperties" type="list" cy:type="List">
        <att name="NODE_LABEL" value="" type="string" cy:type="String"/>
      </att>
    </graphics>
  </node>
  <node id="83860" label="ENSMUSG00000054582" cy:nodeId="846">
    <graphics z="0.0" y="456.13473693401227" x="241.78681076361946">
      <att name="lockedVisualProperties" type="list" cy:type="List">
        <att name="NODE_LABEL" value="" type="string" cy:type="String"/>
      </att>
    </graphics>
  </node>
  <node id="83861" label="ENSMUSG00000054764" cy:nodeId="848">
    <graphics z="0.0" y="321.53514314607247" x="416.284919055019">
      <att name="lockedVisualProperties" type="list" cy:type="List">
        <att name="NODE_LABEL" value="" type="string" cy:type="String"/>
      </att>
    </graphics>
  </node>
  <node id="83862" label="ENSMUSG00000054793" cy:nodeId="849">
    <graphics z="0.0" y="445.8281971518209" x="310.6829305856903">
      <att name="lockedVisualProperties" type="list" cy:type="List">
        <att name="NODE_LABEL" value="" type="string" cy:type="String"/>
      </att>
    </graphics>
  </node>
  <node id="83863" label="ENSMUSG00000055150" cy:nodeId="853">
    <graphics z="0.0" y="416.4919187204651" x="486.75883712982886">
      <att name="lockedVisualProperties" type="list" cy:type="List">
        <att name="NODE_LABEL" value="" type="string" cy:type="String"/>
      </att>
    </graphics>
  </node>
  <node id="83864" label="ENSMUSG00000036892" cy:nodeId="1878">
    <graphics z="0.0" y="5.650673098885422" x="573.3475700476588">
      <att name="lockedVisualProperties" type="list" cy:type="List">
        <att name="NODE_LABEL" value="" type="string" cy:type="String"/>
      </att>
    </graphics>
  </node>
  <node id="83865" label="ENSMUSG00000055745" cy:nodeId="855">
    <graphics z="0.0" y="177.87234433715534" x="-91.2922197968421">
      <att name="lockedVisualProperties" type="list" cy:type="List">
        <att name="NODE_LABEL" value="" type="string" cy:type="String"/>
      </att>
    </graphics>
  </node>
  <node id="83866" label="ENSMUSG00000036932" cy:nodeId="1880">
    <graphics z="0.0" y="561.1856175184514" x="422.1376234052496">
      <att name="lockedVisualProperties" type="list" cy:type="List">
        <att name="NODE_LABEL" value="" type="string" cy:type="String"/>
      </att>
    </graphics>
  </node>
  <node id="83867" label="ENSMUSG00000055980" cy:nodeId="859">
    <graphics z="0.0" y="232.067982110224" x="63.8642600500535">
      <att name="lockedVisualProperties" type="list" cy:type="List">
        <att name="NODE_LABEL" value="" type="string" cy:type="String"/>
      </att>
    </graphics>
  </node>
  <node id="83868" label="ENSMUSG00000056185" cy:nodeId="861">
    <graphics z="0.0" y="144.80047028250635" x="461.5455983194145">
      <att name="lockedVisualProperties" type="list" cy:type="List">
        <att name="NODE_LABEL" value="" type="string" cy:type="String"/>
      </att>
    </graphics>
  </node>
  <node id="83869" label="ENSMUSG00000037348" cy:nodeId="1887">
    <graphics z="0.0" y="465.40493782035776" x="163.65905423185967">
      <att name="lockedVisualProperties" type="list" cy:type="List">
        <att name="NODE_LABEL" value="" type="string" cy:type="String"/>
      </att>
    </graphics>
  </node>
  <node id="83870" label="ENSMUSG00000037493" cy:nodeId="1888">
    <graphics z="0.0" y="211.93248175445441" x="516.418770025096">
      <att name="lockedVisualProperties" type="list" cy:type="List">
        <att name="NODE_LABEL" value="" type="string" cy:type="String"/>
      </att>
    </graphics>
  </node>
  <node id="83871" label="ENSMUSG00000037541" cy:nodeId="1889">
    <graphics z="0.0" y="-97.45739948152863" x="167.72187551689157">
      <att name="lockedVisualProperties" type="list" cy:type="List">
        <att name="NODE_LABEL" value="" type="string" cy:type="String"/>
      </att>
    </graphics>
  </node>
  <node id="83872" label="ENSMUSG00000056832" cy:nodeId="866">
    <graphics z="0.0" y="532.8660284237642" x="69.40559255912915">
      <att name="lockedVisualProperties" type="list" cy:type="List">
        <att name="NODE_LABEL" value="" type="string" cy:type="String"/>
      </att>
    </graphics>
  </node>
  <node id="83873" label="ENSMUSG00000056895" cy:nodeId="867">
    <graphics z="0.0" y="151.19985520814038" x="150.8662019894179">
      <att name="lockedVisualProperties" type="list" cy:type="List">
        <att name="NODE_LABEL" value="" type="string" cy:type="String"/>
      </att>
    </graphics>
  </node>
  <node id="83874" label="ENSMUSG00000037709" cy:nodeId="1893">
    <graphics z="0.0" y="469.2764316713028" x="144.05439714836348">
      <att name="lockedVisualProperties" type="list" cy:type="List">
        <att name="NODE_LABEL" value="" type="string" cy:type="String"/>
      </att>
    </graphics>
  </node>
  <node id="83875" label="ENSMUSG00000057719" cy:nodeId="871">
    <graphics z="0.0" y="11.82867862174136" x="362.7351977637847">
      <att name="lockedVisualProperties" type="list" cy:type="List">
        <att name="NODE_LABEL" value="" type="string" cy:type="String"/>
      </att>
    </graphics>
  </node>
  <node id="83876" label="ENSMUSG00000058070" cy:nodeId="872">
    <graphics z="0.0" y="284.0027149611446" x="384.21135986985263">
      <att name="lockedVisualProperties" type="list" cy:type="List">
        <att name="NODE_LABEL" value="" type="string" cy:type="String"/>
      </att>
    </graphics>
  </node>
  <node id="83877" label="ENSMUSG00000037905" cy:nodeId="1896">
    <graphics z="0.0" y="-142.49772961675848" x="214.78666005464237">
      <att name="lockedVisualProperties" type="list" cy:type="List">
        <att name="NODE_LABEL" value="" type="string" cy:type="String"/>
      </att>
    </graphics>
  </node>
  <node id="83878" label="ENSMUSG00000058290" cy:nodeId="874">
    <graphics z="0.0" y="555.6783814417964" x="144.9158861685429">
      <att name="lockedVisualProperties" type="list" cy:type="List">
        <att name="NODE_LABEL" value="" type="string" cy:type="String"/>
      </att>
    </graphics>
  </node>
  <node id="83879" label="ENSMUSG00000058454" cy:nodeId="875">
    <graphics z="0.0" y="199.08053753292776" x="131.6440777491113">
      <att name="lockedVisualProperties" type="list" cy:type="List">
        <att name="NODE_LABEL" value="" type="string" cy:type="String"/>
      </att>
    </graphics>
  </node>
  <node id="83880" label="ENSMUSG00000058975" cy:nodeId="877">
    <graphics z="0.0" y="398.7655377955981" x="364.92084130711623">
      <att name="lockedVisualProperties" type="list" cy:type="List">
        <att name="NODE_LABEL" value="" type="string" cy:type="String"/>
      </att>
    </graphics>
  </node>
  <node id="83881" label="ENSMUSG00000059401" cy:nodeId="879">
    <graphics z="0.0" y="219.8109785888444" x="389.883325744687">
      <att name="lockedVisualProperties" type="list" cy:type="List">
        <att name="NODE_LABEL" value="" type="string" cy:type="String"/>
      </att>
    </graphics>
  </node>
  <node id="83882" label="ENSMUSG00000038181" cy:nodeId="1905">
    <graphics z="0.0" y="-128.41845451647282" x="284.56038274651405">
      <att name="lockedVisualProperties" type="list" cy:type="List">
        <att name="NODE_LABEL" value="" type="string" cy:type="String"/>
      </att>
    </graphics>
  </node>
  <node id="83883" label="ENSMUSG00000059743" cy:nodeId="883">
    <graphics z="0.0" y="185.6122749600801" x="74.05971457659899">
      <att name="lockedVisualProperties" type="list" cy:type="List">
        <att name="NODE_LABEL" value="" type="string" cy:type="String"/>
      </att>
    </graphics>
  </node>
  <node id="83884" label="ENSMUSG00000059991" cy:nodeId="886">
    <graphics z="0.0" y="313.81581290261977" x="-55.59644260329302">
      <att name="lockedVisualProperties" type="list" cy:type="List">
        <att name="NODE_LABEL" value="" type="string" cy:type="String"/>
      </att>
    </graphics>
  </node>
  <node id="83885" label="ENSMUSG00000060397" cy:nodeId="889">
    <graphics z="0.0" y="448.38642313637706" x="491.3590534059414">
      <att name="lockedVisualProperties" type="list" cy:type="List">
        <att name="NODE_LABEL" value="" type="string" cy:type="String"/>
      </att>
    </graphics>
  </node>
  <node id="83886" label="ENSMUSG00000060733" cy:nodeId="891">
    <graphics z="0.0" y="-79.59450341404556" x="301.69328386716836">
      <att name="lockedVisualProperties" type="list" cy:type="List">
        <att name="NODE_LABEL" value="" type="string" cy:type="String"/>
      </att>
    </graphics>
  </node>
  <node id="83887" label="ENSMUSG00000038580" cy:nodeId="1915">
    <graphics z="0.0" y="129.20512328089927" x="577.2920039675112">
      <att name="lockedVisualProperties" type="list" cy:type="List">
        <att name="NODE_LABEL" value="" type="string" cy:type="String"/>
      </att>
    </graphics>
  </node>
  <node id="83888" label="ENSMUSG00000061397" cy:nodeId="893">
    <graphics z="0.0" y="111.04921371255827" x="294.9267039209101">
      <att name="lockedVisualProperties" type="list" cy:type="List">
        <att name="NODE_LABEL" value="" type="string" cy:type="String"/>
      </att>
    </graphics>
  </node>
  <node id="83889" label="ENSMUSG00000038692" cy:nodeId="1918">
    <graphics z="0.0" y="290.71742399846187" x="311.53763563547506">
      <att name="lockedVisualProperties" type="list" cy:type="List">
        <att name="NODE_LABEL" value="" type="string" cy:type="String"/>
      </att>
    </graphics>
  </node>
  <node id="83890" label="ENSMUSG00000038740" cy:nodeId="1920">
    <graphics z="0.0" y="-65.63809639770199" x="383.54085900767564">
      <att name="lockedVisualProperties" type="list" cy:type="List">
        <att name="NODE_LABEL" value="" type="string" cy:type="String"/>
      </att>
    </graphics>
  </node>
  <node id="83891" label="ENSMUSG00000062683" cy:nodeId="901">
    <graphics z="0.0" y="297.48576066685183" x="559.3099942343923">
      <att name="lockedVisualProperties" type="list" cy:type="List">
        <att name="NODE_LABEL" value="" type="string" cy:type="String"/>
      </att>
    </graphics>
  </node>
  <node id="83892" label="ENSMUSG00000038768" cy:nodeId="1925">
    <graphics z="0.0" y="-32.446941915653014" x="189.48117052149112">
      <att name="lockedVisualProperties" type="list" cy:type="List">
        <att name="NODE_LABEL" value="" type="string" cy:type="String"/>
      </att>
    </graphics>
  </node>
  <node id="83893" label="ENSMUSG00000062908" cy:nodeId="902">
    <graphics z="0.0" y="-15.333190580893628" x="198.91709784236664">
      <att name="lockedVisualProperties" type="list" cy:type="List">
        <att name="NODE_LABEL" value="" type="string" cy:type="String"/>
      </att>
    </graphics>
  </node>
  <node id="83894" label="ENSMUSG00000063524" cy:nodeId="904">
    <graphics z="0.0" y="179.50087952094032" x="541.7547665880563">
      <att name="lockedVisualProperties" type="list" cy:type="List">
        <att name="NODE_LABEL" value="" type="string" cy:type="String"/>
      </att>
    </graphics>
  </node>
  <node id="83895" label="ENSMUSG00000039115" cy:nodeId="1932">
    <graphics z="0.0" y="239.174091996735" x="-39.682429840008595">
      <att name="lockedVisualProperties" type="list" cy:type="List">
        <att name="NODE_LABEL" value="" type="string" cy:type="String"/>
      </att>
    </graphics>
  </node>
  <node id="83896" label="ENSMUSG00000039157" cy:nodeId="1933">
    <graphics z="0.0" y="-90.68133400710352" x="226.58226782746897">
      <att name="lockedVisualProperties" type="list" cy:type="List">
        <att name="NODE_LABEL" value="" type="string" cy:type="String"/>
      </att>
    </graphics>
  </node>
  <node id="83897" label="ENSMUSG00000039166" cy:nodeId="1935">
    <graphics z="0.0" y="127.93286478993284" x="-66.76877950671084">
      <att name="lockedVisualProperties" type="list" cy:type="List">
        <att name="NODE_LABEL" value="" type="string" cy:type="String"/>
      </att>
    </graphics>
  </node>
  <node id="83898" label="ENSMUSG00000064246" cy:nodeId="911">
    <graphics z="0.0" y="161.8352323912346" x="530.358587772226">
      <att name="lockedVisualProperties" type="list" cy:type="List">
        <att name="NODE_LABEL" value="" type="string" cy:type="String"/>
      </att>
    </graphics>
  </node>
  <node id="83899" label="ENSMUSG00000064247" cy:nodeId="912">
    <graphics z="0.0" y="179.0323727309953" x="474.2415808906974">
      <att name="lockedVisualProperties" type="list" cy:type="List">
        <att name="NODE_LABEL" value="" type="string" cy:type="String"/>
      </att>
    </graphics>
  </node>
  <node id="83900" label="ENSMUSG00000067279" cy:nodeId="918">
    <graphics z="0.0" y="346.9069014211259" x="359.6148710869445">
      <att name="lockedVisualProperties" type="list" cy:type="List">
        <att name="NODE_LABEL" value="" type="string" cy:type="String"/>
      </att>
    </graphics>
  </node>
  <node id="83901" label="ENSMUSG00000039384" cy:nodeId="1943">
    <graphics z="0.0" y="169.14169059981612" x="268.96383657902004">
      <att name="lockedVisualProperties" type="list" cy:type="List">
        <att name="NODE_LABEL" value="" type="string" cy:type="String"/>
      </att>
    </graphics>
  </node>
  <node id="83902" label="ENSMUSG00000039497" cy:nodeId="1944">
    <graphics z="0.0" y="455.45915775195937" x="365.49072500898444">
      <att name="lockedVisualProperties" type="list" cy:type="List">
        <att name="NODE_LABEL" value="" type="string" cy:type="String"/>
      </att>
    </graphics>
  </node>
  <node id="83903" label="ENSMUSG00000068196" cy:nodeId="920">
    <graphics z="0.0" y="133.74952094456486" x="399.63454659728507">
      <att name="lockedVisualProperties" type="list" cy:type="List">
        <att name="NODE_LABEL" value="" type="string" cy:type="String"/>
      </att>
    </graphics>
  </node>
  <node id="83904" label="ENSMUSG00000068617" cy:nodeId="922">
    <graphics z="0.0" y="286.8106261719039" x="46.600153219510574">
      <att name="lockedVisualProperties" type="list" cy:type="List">
        <att name="NODE_LABEL" value="" type="string" cy:type="String"/>
      </att>
    </graphics>
  </node>
  <node id="83905" label="ENSMUSG00000068735" cy:nodeId="924">
    <graphics z="0.0" y="221.95917889441358" x="525.6363114928045">
      <att name="lockedVisualProperties" type="list" cy:type="List">
        <att name="NODE_LABEL" value="" type="string" cy:type="String"/>
      </att>
    </graphics>
  </node>
  <node id="83906" label="ENSMUSG00000039620" cy:nodeId="1949">
    <graphics z="0.0" y="358.0741975228086" x="100.123773381451">
      <att name="lockedVisualProperties" type="list" cy:type="List">
        <att name="NODE_LABEL" value="" type="string" cy:type="String"/>
      </att>
    </graphics>
  </node>
  <node id="83907" label="ENSMUSG00000039693" cy:nodeId="1953">
    <graphics z="0.0" y="35.76190221585174" x="24.409442171868818">
      <att name="lockedVisualProperties" type="list" cy:type="List">
        <att name="NODE_LABEL" value="" type="string" cy:type="String"/>
      </att>
    </graphics>
  </node>
  <node id="83908" label="ENSMUSG00000039713" cy:nodeId="1954">
    <graphics z="0.0" y="193.66197427932528" x="682.1411466162903">
      <att name="lockedVisualProperties" type="list" cy:type="List">
        <att name="NODE_LABEL" value="" type="string" cy:type="String"/>
      </att>
    </graphics>
  </node>
  <node id="83909" label="ENSMUSG00000070733" cy:nodeId="933">
    <graphics z="0.0" y="426.02711431873144" x="143.58469953767846">
      <att name="lockedVisualProperties" type="list" cy:type="List">
        <att name="NODE_LABEL" value="" type="string" cy:type="String"/>
      </att>
    </graphics>
  </node>
  <node id="83910" label="ENSMUSG00000070867" cy:nodeId="935">
    <graphics z="0.0" y="379.6638246611684" x="-10.879829007893616">
      <att name="lockedVisualProperties" type="list" cy:type="List">
        <att name="NODE_LABEL" value="" type="string" cy:type="String"/>
      </att>
    </graphics>
  </node>
  <node id="83911" label="ENSMUSG00000071506" cy:nodeId="937">
    <graphics z="0.0" y="252.60143235950392" x="142.01006119451128">
      <att name="lockedVisualProperties" type="list" cy:type="List">
        <att name="NODE_LABEL" value="" type="string" cy:type="String"/>
      </att>
    </graphics>
  </node>
  <node id="83912" label="ENSMUSG00000040181" cy:nodeId="1965">
    <graphics z="0.0" y="124.53137011607534" x="408.8033628824138">
      <att name="lockedVisualProperties" type="list" cy:type="List">
        <att name="NODE_LABEL" value="" type="string" cy:type="String"/>
      </att>
    </graphics>
  </node>
  <node id="83913" label="ENSMUSG00000072214" cy:nodeId="942">
    <graphics z="0.0" y="531.8227323799033" x="273.61882938629344">
      <att name="lockedVisualProperties" type="list" cy:type="List">
        <att name="NODE_LABEL" value="" type="string" cy:type="String"/>
      </att>
    </graphics>
  </node>
  <node id="83914" label="ENSMUSG00000040624" cy:nodeId="1974">
    <graphics z="0.0" y="31.70922795566547" x="264.00923470888944">
      <att name="lockedVisualProperties" type="list" cy:type="List">
        <att name="NODE_LABEL" value="" type="string" cy:type="String"/>
      </att>
    </graphics>
  </node>
  <node id="83915" label="ENSMUSG00000075012" cy:nodeId="954">
    <graphics z="0.0" y="590.8646457735828" x="438.07964056124854">
      <att name="lockedVisualProperties" type="list" cy:type="List">
        <att name="NODE_LABEL" value="" type="string" cy:type="String"/>
      </att>
    </graphics>
  </node>
  <node id="83916" label="ENSMUSG00000075122" cy:nodeId="955">
    <graphics z="0.0" y="338.64580143348945" x="503.1208147777927">
      <att name="lockedVisualProperties" type="list" cy:type="List">
        <att name="NODE_LABEL" value="" type="string" cy:type="String"/>
      </att>
    </graphics>
  </node>
  <node id="83917" label="ENSMUSG00000078202" cy:nodeId="958">
    <graphics z="0.0" y="28.71499862165856" x="476.85950833045587">
      <att name="lockedVisualProperties" type="list" cy:type="List">
        <att name="NODE_LABEL" value="" type="string" cy:type="String"/>
      </att>
    </graphics>
  </node>
  <node id="83918" label="ENSMUSG00000041000" cy:nodeId="1983">
    <graphics z="0.0" y="207.60287507598747" x="79.02687328292299">
      <att name="lockedVisualProperties" type="list" cy:type="List">
        <att name="NODE_LABEL" value="" type="string" cy:type="String"/>
      </att>
    </graphics>
  </node>
  <node id="83919" label="ENSMUSG00000079018" cy:nodeId="963">
    <graphics z="0.0" y="87.49647777729092" x="184.13407242223775">
      <att name="lockedVisualProperties" type="list" cy:type="List">
        <att name="NODE_LABEL" value="" type="string" cy:type="String"/>
      </att>
    </graphics>
  </node>
  <node id="83920" label="ENSMUSG00000041420" cy:nodeId="1989">
    <graphics z="0.0" y="-61.591804124855145" x="450.0374806436757">
      <att name="lockedVisualProperties" type="list" cy:type="List">
        <att name="NODE_LABEL" value="" type="string" cy:type="String"/>
      </att>
    </graphics>
  </node>
  <node id="83921" label="ENSMUSG00000079497" cy:nodeId="966">
    <graphics z="0.0" y="582.7584952693509" x="140.2789795183393">
      <att name="lockedVisualProperties" type="list" cy:type="List">
        <att name="NODE_LABEL" value="" type="string" cy:type="String"/>
      </att>
    </graphics>
  </node>
  <node id="83922" label="ENSMUSG00000090291" cy:nodeId="969">
    <graphics z="0.0" y="53.60762912080933" x="473.1586417168089">
      <att name="lockedVisualProperties" type="list" cy:type="List">
        <att name="NODE_LABEL" value="" type="string" cy:type="String"/>
      </att>
    </graphics>
  </node>
  <node id="83923" label="ENSMUSG00000091243" cy:nodeId="970">
    <graphics z="0.0" y="459.45485099427265" x="373.8946841315254">
      <att name="lockedVisualProperties" type="list" cy:type="List">
        <att name="NODE_LABEL" value="" type="string" cy:type="String"/>
      </att>
    </graphics>
  </node>
  <node id="83924" label="ENSMUSG00000041729" cy:nodeId="1996">
    <graphics z="0.0" y="111.97421474126168" x="694.8758543697537">
      <att name="lockedVisualProperties" type="list" cy:type="List">
        <att name="NODE_LABEL" value="" type="string" cy:type="String"/>
      </att>
    </graphics>
  </node>
  <node id="83925" label="ENSMUSG00000094626" cy:nodeId="973">
    <graphics z="0.0" y="448.29052890477567" x="587.4342434010165">
      <att name="lockedVisualProperties" type="list" cy:type="List">
        <att name="NODE_LABEL" value="" type="string" cy:type="String"/>
      </att>
    </graphics>
  </node>
  <node id="83926" label="ENSMUSG00000041945" cy:nodeId="2001">
    <graphics z="0.0" y="-88.71023091073623" x="217.07930776073084">
      <att name="lockedVisualProperties" type="list" cy:type="List">
        <att name="NODE_LABEL" value="" type="string" cy:type="String"/>
      </att>
    </graphics>
  </node>
  <node id="83927" label="ENSMUSG00000041974" cy:nodeId="2002">
    <graphics z="0.0" y="11.41676744706384" x="-6.330228786413361">
      <att name="lockedVisualProperties" type="list" cy:type="List">
        <att name="NODE_LABEL" value="" type="string" cy:type="String"/>
      </att>
    </graphics>
  </node>
  <node id="83928" label="ENSMUSG00000096847" cy:nodeId="978">
    <graphics z="0.0" y="-91.0000434342554" x="317.622821059862">
      <att name="lockedVisualProperties" type="list" cy:type="List">
        <att name="NODE_LABEL" value="" type="string" cy:type="String"/>
      </att>
    </graphics>
  </node>
  <node id="83929" label="ENSMUSG00000042041" cy:nodeId="2003">
    <graphics z="0.0" y="305.2985957113354" x="582.7331617177377">
      <att name="lockedVisualProperties" type="list" cy:type="List">
        <att name="NODE_LABEL" value="" type="string" cy:type="String"/>
      </att>
    </graphics>
  </node>
  <node id="83930" label="ENSMUSG00000098132" cy:nodeId="979">
    <graphics z="0.0" y="596.1132491409068" x="217.75542202670553">
      <att name="lockedVisualProperties" type="list" cy:type="List">
        <att name="NODE_LABEL" value="" type="string" cy:type="String"/>
      </att>
    </graphics>
  </node>
  <node id="83931" label="ENSMUSG00000042155" cy:nodeId="2004">
    <graphics z="0.0" y="391.48323921538866" x="-90.04649901747763">
      <att name="lockedVisualProperties" type="list" cy:type="List">
        <att name="NODE_LABEL" value="" type="string" cy:type="String"/>
      </att>
    </graphics>
  </node>
  <node id="83932" label="ENSMUSG00000042251" cy:nodeId="2007">
    <graphics z="0.0" y="284.07757851573126" x="486.5299594553642">
      <att name="lockedVisualProperties" type="list" cy:type="List">
        <att name="NODE_LABEL" value="" type="string" cy:type="String"/>
      </att>
    </graphics>
  </node>
  <node id="83933" label="ENSMUSG00000042501" cy:nodeId="2012">
    <graphics z="0.0" y="1.0481432675624767" x="305.6619010995151">
      <att name="lockedVisualProperties" type="list" cy:type="List">
        <att name="NODE_LABEL" value="" type="string" cy:type="String"/>
      </att>
    </graphics>
  </node>
  <node id="83934" label="ENSMUSG00000042686" cy:nodeId="2016">
    <graphics z="0.0" y="152.51597234006192" x="-179.40013412268496">
      <att name="lockedVisualProperties" type="list" cy:type="List">
        <att name="NODE_LABEL" value="" type="string" cy:type="String"/>
      </att>
    </graphics>
  </node>
  <node id="83935" label="ENSMUSG00000042712" cy:nodeId="2017">
    <graphics z="0.0" y="121.20080548833455" x="77.08409344944573">
      <att name="lockedVisualProperties" type="list" cy:type="List">
        <att name="NODE_LABEL" value="" type="string" cy:type="String"/>
      </att>
    </graphics>
  </node>
  <node id="83936" label="ENSMUSG00000042751" cy:nodeId="2019">
    <graphics z="0.0" y="-91.51484885932501" x="88.87035167290371">
      <att name="lockedVisualProperties" type="list" cy:type="List">
        <att name="NODE_LABEL" value="" type="string" cy:type="String"/>
      </att>
    </graphics>
  </node>
  <node id="83937" label="ENSMUSG00000005268" cy:nodeId="997">
    <graphics z="0.0" y="-65.15661401890912" x="121.40745773163054">
      <att name="lockedVisualProperties" type="list" cy:type="List">
        <att name="NODE_LABEL" value="" type="string" cy:type="String"/>
      </att>
    </graphics>
  </node>
  <node id="83938" label="ENSMUSG00000005355" cy:nodeId="998">
    <graphics z="0.0" y="249.33641774860544" x="197.2043901239005">
      <att name="lockedVisualProperties" type="list" cy:type="List">
        <att name="NODE_LABEL" value="" type="string" cy:type="String"/>
      </att>
    </graphics>
  </node>
  <node id="83939" label="ENSMUSG00000010505" cy:nodeId="1002">
    <graphics z="0.0" y="53.70387111739406" x="206.11460358587783">
      <att name="lockedVisualProperties" type="list" cy:type="List">
        <att name="NODE_LABEL" value="" type="string" cy:type="String"/>
      </att>
    </graphics>
  </node>
  <node id="83940" label="ENSMUSG00000043461" cy:nodeId="2030">
    <graphics z="0.0" y="-101.7819565947194" x="138.11752719442103">
      <att name="lockedVisualProperties" type="list" cy:type="List">
        <att name="NODE_LABEL" value="" type="string" cy:type="String"/>
      </att>
    </graphics>
  </node>
</graph>
