# Supplementary material for: Regulatory network analysis of Paneth cell and goblet cell enriched gut organoids using transcriptomics approaches
Source: Royal Society of Chemistry journal article supplement (doi:10.1039/c9mo00130a), 2019-12-10
Supplement: c9mo00130a2.cys [file c9mo00130a2.cys]

Archive with 149 entries (149 files):
- CytoscapeSession-2019_09_26-21_57/3.0.0.version
- CytoscapeSession-2019_09_26-21_57/networks/36-Gob_network_lfc1.txt.xgmml
- CytoscapeSession-2019_09_26-21_57/views/21371-44768-1%3A+Cluster+3+%28Score%3A+5.923%29.xgmml
- CytoscapeSession-2019_09_26-21_57/views/21381-21528-1%3A+Cluster+1+%28Score%3A+8.022%29.xgmml
- CytoscapeSession-2019_09_26-21_57/views/21431-45904-1%3A+Cluster+7+%28Score%3A+2.667%29.xgmml
- CytoscapeSession-2019_09_26-21_57/views/62-23331-Gob_network_lfc1.txt.xgmml
- CytoscapeSession-2019_09_26-21_57/views/21411-44632-1%3A+Cluster+5+%28Score%3A+3.333%29.xgmml
- CytoscapeSession-2019_09_26-21_57/views/21421-44758-1%3A+Cluster+6+%28Score%3A+2.667%29.xgmml
- CytoscapeSession-2019_09_26-21_57/views/21391-44651-1%3A+Cluster+2+%28Score%3A+7.429%29.xgmml
- CytoscapeSession-2019_09_26-21_57/views/21401-45914-1%3A+Cluster+4+%28Score%3A+3.714%29.xgmml
- CytoscapeSession-2019_09_26-21_57/tables/36-Gob_network_lfc1.txt/HIDDEN-org.cytoscape.model.CyNode-36+hidden+node.cytable
- CytoscapeSession-2019_09_26-21_57/tables/21421-1%3A+Cluster+6+%28Score%3A+2.667%29/LOCAL_ATTRS-org.cytoscape.model.CyNode-1%3A+Cluster+6+%28Score%3A+2.667%29+default+node.cytable
- CytoscapeSession-2019_09_26-21_57/tables/21391-1%3A+Cluster+2+%28Score%3A+7.429%29/LOCAL_ATTRS-org.cytoscape.model.CyEdge-1%3A+Cluster+2+%28Score%3A+7.429%29+default+edge.cytable
- CytoscapeSession-2019_09_26-21_57/tables/36-Gob_network_lfc1.txt/SHARED_ATTRS-org.cytoscape.model.CyEdge-36+shared+edge.cytable
- CytoscapeSession-2019_09_26-21_57/tables/21381-1%3A+Cluster+1+%28Score%3A+8.022%29/HIDDEN-org.cytoscape.model.CyNetwork-21381+hidden+network.cytable
- CytoscapeSession-2019_09_26-21_57/tables/21401-1%3A+Cluster+4+%28Score%3A+3.714%29/HIDDEN-org.cytoscape.model.CyNetwork-21401+hidden+network.cytable
- CytoscapeSession-2019_09_26-21_57/tables/62-Gob_network_lfc1.txt/HIDDEN-org.cytoscape.model.CyEdge-62+hidden+edge.cytable
- CytoscapeSession-2019_09_26-21_57/tables/36-Gob_network_lfc1.txt/HIDDEN-org.cytoscape.model.CyNetwork-36+hidden+network.cytable
- CytoscapeSession-2019_09_26-21_57/tables/21381-1%3A+Cluster+1+%28Score%3A+8.022%29/LOCAL_ATTRS-org.cytoscape.model.CyNode-1%3A+Cluster+1+%28Score%3A+8.022%29+default+node.cytable
- CytoscapeSession-2019_09_26-21_57/tables/21421-1%3A+Cluster+6+%28Score%3A+2.667%29/HIDDEN-org.cytoscape.model.CyNode-21421+hidden+node.cytable
- CytoscapeSession-2019_09_26-21_57/tables/21431-1%3A+Cluster+7+%28Score%3A+2.667%29/org.baderlab.autoannotate.annotationSet-org.cytoscape.model.CyNetwork-org.baderlab.autoannotate.annotationSet.cytable
- CytoscapeSession-2019_09_26-21_57/tables/21421-1%3A+Cluster+6+%28Score%3A+2.667%29/LOCAL_ATTRS-org.cytoscape.model.CyNetwork-1%3A+Cluster+6+%28Score%3A+2.667%29+default+network.cytable
- CytoscapeSession-2019_09_26-21_57/tables/global/21490-EnrichmentMap.Model.1.cytable
- CytoscapeSession-2019_09_26-21_57/tables/21401-1%3A+Cluster+4+%28Score%3A+3.714%29/org.baderlab.autoannotate.annotationSet-org.cytoscape.model.CyNetwork-org.baderlab.autoannotate.annotationSet.cytable
- CytoscapeSession-2019_09_26-21_57/tables/36-Gob_network_lfc1.txt/SHARED_ATTRS-org.cytoscape.model.CyNetwork-36+shared+network.cytable
- CytoscapeSession-2019_09_26-21_57/tables/21371-1%3A+Cluster+3+%28Score%3A+5.923%29/LOCAL_ATTRS-org.cytoscape.model.CyNode-1%3A+Cluster+3+%28Score%3A+5.923%29+default+node.cytable
- CytoscapeSession-2019_09_26-21_57/tables/21391-1%3A+Cluster+2+%28Score%3A+7.429%29/HIDDEN-org.cytoscape.model.CyNetwork-21391+hidden+network.cytable
- CytoscapeSession-2019_09_26-21_57/tables/36-Gob_network_lfc1.txt/LOCAL_ATTRS-org.cytoscape.model.CyNetwork-36+default+network.cytable
- CytoscapeSession-2019_09_26-21_57/tables/62-Gob_network_lfc1.txt/HIDDEN-org.cytoscape.model.CyNetwork-62+hidden+network.cytable
- CytoscapeSession-2019_09_26-21_57/tables/62-Gob_network_lfc1.txt/LOCAL_ATTRS-org.cytoscape.model.CyNode-Gob_network_lfc1.txt+default+node.cytable
- CytoscapeSession-2019_09_26-21_57/tables/21411-1%3A+Cluster+5+%28Score%3A+3.333%29/HIDDEN-org.cytoscape.model.CyEdge-21411+hidden+edge.cytable
- CytoscapeSession-2019_09_26-21_57/tables/52-52/LOCAL_ATTRS-org.cytoscape.model.CyNetwork-52+default+network.cytable
- CytoscapeSession-2019_09_26-21_57/tables/21431-1%3A+Cluster+7+%28Score%3A+2.667%29/HIDDEN-org.cytoscape.model.CyNode-21431+hidden+node.cytable
- CytoscapeSession-2019_09_26-21_57/tables/21391-1%3A+Cluster+2+%28Score%3A+7.429%29/org.baderlab.autoannotate.cluster-org.cytoscape.model.CyNetwork-org.baderlab.autoannotate.cluster.cytable
- CytoscapeSession-2019_09_26-21_57/tables/21371-1%3A+Cluster+3+%28Score%3A+5.923%29/HIDDEN-org.cytoscape.model.CyEdge-21371+hidden+edge.cytable
- CytoscapeSession-2019_09_26-21_57/tables/21391-1%3A+Cluster+2+%28Score%3A+7.429%29/LOCAL_ATTRS-org.cytoscape.model.CyNetwork-1%3A+Cluster+2+%28Score%3A+7.429%29+default+network.cytable
- CytoscapeSession-2019_09_26-21_57/tables/36-Gob_network_lfc1.txt/LOCAL_ATTRS-org.cytoscape.model.CyNode-36+default+node.cytable
- CytoscapeSession-2019_09_26-21_57/tables/21401-1%3A+Cluster+4+%28Score%3A+3.714%29/org.baderlab.autoannotate.cluster-org.cytoscape.model.CyNetwork-org.baderlab.autoannotate.cluster.cytable
- CytoscapeSession-2019_09_26-21_57/tables/62-Gob_network_lfc1.txt/HIDDEN-org.cytoscape.model.CyNode-62+hidden+node.cytable
- CytoscapeSession-2019_09_26-21_57/tables/21371-1%3A+Cluster+3+%28Score%3A+5.923%29/org.baderlab.autoannotate.cluster-org.cytoscape.model.CyNetwork-org.baderlab.autoannotate.cluster.cytable
- CytoscapeSession-2019_09_26-21_57/tables/21371-1%3A+Cluster+3+%28Score%3A+5.923%29/LOCAL_ATTRS-org.cytoscape.model.CyEdge-1%3A+Cluster+3+%28Score%3A+5.923%29+default+edge.cytable
- CytoscapeSession-2019_09_26-21_57/tables/21371-1%3A+Cluster+3+%28Score%3A+5.923%29/LOCAL_ATTRS-org.cytoscape.model.CyNetwork-1%3A+Cluster+3+%28Score%3A+5.923%29+default+network.cytable
- CytoscapeSession-2019_09_26-21_57/tables/21411-1%3A+Cluster+5+%28Score%3A+3.333%29/LOCAL_ATTRS-org.cytoscape.model.CyEdge-1%3A+Cluster+5+%28Score%3A+3.333%29+default+edge.cytable
- CytoscapeSession-2019_09_26-21_57/tables/52-52/LOCAL_ATTRS-org.cytoscape.model.CyEdge-52+default+edge.cytable
- CytoscapeSession-2019_09_26-21_57/tables/21391-1%3A+Cluster+2+%28Score%3A+7.429%29/LOCAL_ATTRS-org.cytoscape.model.CyNode-1%3A+Cluster+2+%28Score%3A+7.429%29+default+node.cytable
- CytoscapeSession-2019_09_26-21_57/tables/global/21501-EnrichmentMap.View.1.cytable
- CytoscapeSession-2019_09_26-21_57/tables/21411-1%3A+Cluster+5+%28Score%3A+3.333%29/LOCAL_ATTRS-org.cytoscape.model.CyNode-1%3A+Cluster+5+%28Score%3A+3.333%29+default+node.cytable
- CytoscapeSession-2019_09_26-21_57/tables/global/21500-21457+hidden+network.cytable
- CytoscapeSession-2019_09_26-21_57/tables/21431-1%3A+Cluster+7+%28Score%3A+2.667%29/LOCAL_ATTRS-org.cytoscape.model.CyNode-1%3A+Cluster+7+%28Score%3A+2.667%29+default+node.cytable
- CytoscapeSession-2019_09_26-21_57/tables/21411-1%3A+Cluster+5+%28Score%3A+3.333%29/org.baderlab.autoannotate.cluster-org.cytoscape.model.CyNetwork-org.baderlab.autoannotate.cluster.cytable
- CytoscapeSession-2019_09_26-21_57/tables/21381-1%3A+Cluster+1+%28Score%3A+8.022%29/HIDDEN-org.cytoscape.model.CyNode-21381+hidden+node.cytable
- CytoscapeSession-2019_09_26-21_57/tables/21421-1%3A+Cluster+6+%28Score%3A+2.667%29/org.baderlab.autoannotate.annotationSet-org.cytoscape.model.CyNetwork-org.baderlab.autoannotate.annotationSet.cytable
- CytoscapeSession-2019_09_26-21_57/tables/21421-1%3A+Cluster+6+%28Score%3A+2.667%29/HIDDEN-org.cytoscape.model.CyEdge-21421+hidden+edge.cytable
- CytoscapeSession-2019_09_26-21_57/tables/36-Gob_network_lfc1.txt/SHARED_ATTRS-org.cytoscape.model.CyNode-36+shared+node.cytable
- CytoscapeSession-2019_09_26-21_57/tables/21381-1%3A+Cluster+1+%28Score%3A+8.022%29/HIDDEN-org.cytoscape.model.CyEdge-21381+hidden+edge.cytable
- CytoscapeSession-2019_09_26-21_57/tables/21411-1%3A+Cluster+5+%28Score%3A+3.333%29/org.baderlab.autoannotate.annotationSet-org.cytoscape.model.CyNetwork-org.baderlab.autoannotate.annotationSet.cytable
- CytoscapeSession-2019_09_26-21_57/tables/global/21466-21457+default+network.cytable
- CytoscapeSession-2019_09_26-21_57/tables/21421-1%3A+Cluster+6+%28Score%3A+2.667%29/org.baderlab.autoannotate.cluster-org.cytoscape.model.CyNetwork-org.baderlab.autoannotate.cluster.cytable
- CytoscapeSession-2019_09_26-21_57/tables/21411-1%3A+Cluster+5+%28Score%3A+3.333%29/HIDDEN-org.cytoscape.model.CyNode-21411+hidden+node.cytable
- CytoscapeSession-2019_09_26-21_57/tables/global/21527-21457+hidden+edge.cytable
- CytoscapeSession-2019_09_26-21_57/tables/52-52/HIDDEN-org.cytoscape.model.CyEdge-52+hidden+edge.cytable
- CytoscapeSession-2019_09_26-21_57/tables/62-Gob_network_lfc1.txt/LOCAL_ATTRS-org.cytoscape.model.CyNetwork-Gob_network_lfc1.txt+default+network.cytable
- CytoscapeSession-2019_09_26-21_57/tables/62-Gob_network_lfc1.txt/org.baderlab.autoannotate.cluster-org.cytoscape.model.CyNetwork-org.baderlab.autoannotate.cluster.cytable
- CytoscapeSession-2019_09_26-21_57/tables/21401-1%3A+Cluster+4+%28Score%3A+3.714%29/HIDDEN-org.cytoscape.model.CyNode-21401+hidden+node.cytable
- CytoscapeSession-2019_09_26-21_57/tables/21421-1%3A+Cluster+6+%28Score%3A+2.667%29/HIDDEN-org.cytoscape.model.CyNetwork-21421+hidden+network.cytable
- CytoscapeSession-2019_09_26-21_57/tables/21381-1%3A+Cluster+1+%28Score%3A+8.022%29/org.baderlab.autoannotate.annotationSet-org.cytoscape.model.CyNetwork-org.baderlab.autoannotate.annotationSet.cytable
- CytoscapeSession-2019_09_26-21_57/tables/21431-1%3A+Cluster+7+%28Score%3A+2.667%29/LOCAL_ATTRS-org.cytoscape.model.CyNetwork-1%3A+Cluster+7+%28Score%3A+2.667%29+default+network.cytable
- CytoscapeSession-2019_09_26-21_57/tables/21401-1%3A+Cluster+4+%28Score%3A+3.714%29/LOCAL_ATTRS-org.cytoscape.model.CyEdge-1%3A+Cluster+4+%28Score%3A+3.714%29+default+edge.cytable
- CytoscapeSession-2019_09_26-21_57/tables/36-Gob_network_lfc1.txt/HIDDEN-org.cytoscape.model.CyEdge-36+hidden+edge.cytable
- CytoscapeSession-2019_09_26-21_57/tables/21381-1%3A+Cluster+1+%28Score%3A+8.022%29/LOCAL_ATTRS-org.cytoscape.model.CyNetwork-1%3A+Cluster+1+%28Score%3A+8.022%29+default+network.cytable
- CytoscapeSession-2019_09_26-21_57/tables/21371-1%3A+Cluster+3+%28Score%3A+5.923%29/HIDDEN-org.cytoscape.model.CyNode-21371+hidden+node.cytable
- CytoscapeSession-2019_09_26-21_57/tables/global/21463-21457+hidden+node.cytable
- CytoscapeSession-2019_09_26-21_57/tables/52-52/HIDDEN-org.cytoscape.model.CyNetwork-52+hidden+network.cytable
- CytoscapeSession-2019_09_26-21_57/tables/21391-1%3A+Cluster+2+%28Score%3A+7.429%29/HIDDEN-org.cytoscape.model.CyEdge-21391+hidden+edge.cytable
- CytoscapeSession-2019_09_26-21_57/tables/21411-1%3A+Cluster+5+%28Score%3A+3.333%29/LOCAL_ATTRS-org.cytoscape.model.CyNetwork-1%3A+Cluster+5+%28Score%3A+3.333%29+default+network.cytable
- CytoscapeSession-2019_09_26-21_57/tables/21431-1%3A+Cluster+7+%28Score%3A+2.667%29/HIDDEN-org.cytoscape.model.CyEdge-21431+hidden+edge.cytable
- CytoscapeSession-2019_09_26-21_57/tables/21401-1%3A+Cluster+4+%28Score%3A+3.714%29/LOCAL_ATTRS-org.cytoscape.model.CyNetwork-1%3A+Cluster+4+%28Score%3A+3.714%29+default+network.cytable
- CytoscapeSession-2019_09_26-21_57/tables/21421-1%3A+Cluster+6+%28Score%3A+2.667%29/LOCAL_ATTRS-org.cytoscape.model.CyEdge-1%3A+Cluster+6+%28Score%3A+2.667%29+default+edge.cytable
- CytoscapeSession-2019_09_26-21_57/tables/21431-1%3A+Cluster+7+%28Score%3A+2.667%29/org.baderlab.autoannotate.cluster-org.cytoscape.model.CyNetwork-org.baderlab.autoannotate.cluster.cytable
- CytoscapeSession-2019_09_26-21_57/tables/21391-1%3A+Cluster+2+%28Score%3A+7.429%29/HIDDEN-org.cytoscape.model.CyNode-21391+hidden+node.cytable
- CytoscapeSession-2019_09_26-21_57/tables/21431-1%3A+Cluster+7+%28Score%3A+2.667%29/HIDDEN-org.cytoscape.model.CyNetwork-21431+hidden+network.cytable
- CytoscapeSession-2019_09_26-21_57/tables/62-Gob_network_lfc1.txt/org.baderlab.autoannotate.annotationSet-org.cytoscape.model.CyNetwork-org.baderlab.autoannotate.annotationSet.cytable
- CytoscapeSession-2019_09_26-21_57/tables/global/21525-21457+default+node.cytable
- CytoscapeSession-2019_09_26-21_57/tables/21401-1%3A+Cluster+4+%28Score%3A+3.714%29/HIDDEN-org.cytoscape.model.CyEdge-21401+hidden+edge.cytable
- CytoscapeSession-2019_09_26-21_57/tables/21381-1%3A+Cluster+1+%28Score%3A+8.022%29/org.baderlab.autoannotate.cluster-org.cytoscape.model.CyNetwork-org.baderlab.autoannotate.cluster.cytable
- CytoscapeSession-2019_09_26-21_57/tables/36-Gob_network_lfc1.txt/LOCAL_ATTRS-org.cytoscape.model.CyEdge-36+default+edge.cytable
- CytoscapeSession-2019_09_26-21_57/tables/52-52/LOCAL_ATTRS-org.cytoscape.model.CyNode-52+default+node.cytable
- CytoscapeSession-2019_09_26-21_57/tables/21381-1%3A+Cluster+1+%28Score%3A+8.022%29/LOCAL_ATTRS-org.cytoscape.model.CyEdge-1%3A+Cluster+1+%28Score%3A+8.022%29+default+edge.cytable
- CytoscapeSession-2019_09_26-21_57/tables/21401-1%3A+Cluster+4+%28Score%3A+3.714%29/LOCAL_ATTRS-org.cytoscape.model.CyNode-1%3A+Cluster+4+%28Score%3A+3.714%29+default+node.cytable
- CytoscapeSession-2019_09_26-21_57/tables/21371-1%3A+Cluster+3+%28Score%3A+5.923%29/org.baderlab.autoannotate.annotationSet-org.cytoscape.model.CyNetwork-org.baderlab.autoannotate.annotationSet.cytable
- CytoscapeSession-2019_09_26-21_57/tables/global/21461-21457+default+edge.cytable
- CytoscapeSession-2019_09_26-21_57/tables/52-52/HIDDEN-org.cytoscape.model.CyNode-52+hidden+node.cytable
- CytoscapeSession-2019_09_26-21_57/tables/21431-1%3A+Cluster+7+%28Score%3A+2.667%29/LOCAL_ATTRS-org.cytoscape.model.CyEdge-1%3A+Cluster+7+%28Score%3A+2.667%29+default+edge.cytable
- CytoscapeSession-2019_09_26-21_57/tables/62-Gob_network_lfc1.txt/LOCAL_ATTRS-org.cytoscape.model.CyEdge-Gob_network_lfc1.txt+default+edge.cytable
- CytoscapeSession-2019_09_26-21_57/tables/21391-1%3A+Cluster+2+%28Score%3A+7.429%29/org.baderlab.autoannotate.annotationSet-org.cytoscape.model.CyNetwork-org.baderlab.autoannotate.annotationSet.cytable
- CytoscapeSession-2019_09_26-21_57/tables/21411-1%3A+Cluster+5+%28Score%3A+3.333%29/HIDDEN-org.cytoscape.model.CyNetwork-21411+hidden+network.cytable
- CytoscapeSession-2019_09_26-21_57/tables/21371-1%3A+Cluster+3+%28Score%3A+5.923%29/HIDDEN-org.cytoscape.model.CyNetwork-21371+hidden+network.cytable
- CytoscapeSession-2019_09_26-21_57/tables/cytables.xml
- CytoscapeSession-2019_09_26-21_57/session_vizmap.xml
- CytoscapeSession-2019_09_26-21_57/properties/org.genemania.props
- CytoscapeSession-2019_09_26-21_57/properties/stringApp.props
- CytoscapeSession-2019_09_26-21_57/properties/groupSettings.props
- CytoscapeSession-2019_09_26-21_57/properties/session_bookmarks.xml
- CytoscapeSession-2019_09_26-21_57/session_thumbnail.png
- CytoscapeSession-2019_09_26-21_57/apps/org.cytoscape.ding.customgraphicsmgr/image_metadata.props
- CytoscapeSession-2019_09_26-21_57/apps/org.cytoscape.ding.customgraphicsmgr/8.png
- CytoscapeSession-2019_09_26-21_57/apps/org.cytoscape.ding.customgraphicsmgr/9.png
- CytoscapeSession-2019_09_26-21_57/apps/org.cytoscape.ding.customgraphicsmgr/14.png
- CytoscapeSession-2019_09_26-21_57/apps/org.cytoscape.ding.customgraphicsmgr/28.png
- CytoscapeSession-2019_09_26-21_57/apps/org.cytoscape.ding.customgraphicsmgr/29.png
- CytoscapeSession-2019_09_26-21_57/apps/org.cytoscape.ding.customgraphicsmgr/15.png
- CytoscapeSession-2019_09_26-21_57/apps/org.cytoscape.ding.customgraphicsmgr/17.png
- CytoscapeSession-2019_09_26-21_57/apps/org.cytoscape.ding.customgraphicsmgr/16.png
- CytoscapeSession-2019_09_26-21_57/apps/org.cytoscape.ding.customgraphicsmgr/12.png
- CytoscapeSession-2019_09_26-21_57/apps/org.cytoscape.ding.customgraphicsmgr/13.png
- CytoscapeSession-2019_09_26-21_57/apps/org.cytoscape.ding.customgraphicsmgr/11.png
- CytoscapeSession-2019_09_26-21_57/apps/org.cytoscape.ding.customgraphicsmgr/10.png
- CytoscapeSession-2019_09_26-21_57/apps/org.cytoscape.ding.customgraphicsmgr/21.png
- CytoscapeSession-2019_09_26-21_57/apps/org.cytoscape.ding.customgraphicsmgr/20.png
- CytoscapeSession-2019_09_26-21_57/apps/org.cytoscape.ding.customgraphicsmgr/34.png
- CytoscapeSession-2019_09_26-21_57/apps/org.cytoscape.ding.customgraphicsmgr/22.png
- CytoscapeSession-2019_09_26-21_57/apps/org.cytoscape.ding.customgraphicsmgr/23.png
- CytoscapeSession-2019_09_26-21_57/apps/org.cytoscape.ding.customgraphicsmgr/27.png
- CytoscapeSession-2019_09_26-21_57/apps/org.cytoscape.ding.customgraphicsmgr/33.png
- CytoscapeSession-2019_09_26-21_57/apps/org.cytoscape.ding.customgraphicsmgr/32.png
- CytoscapeSession-2019_09_26-21_57/apps/org.cytoscape.ding.customgraphicsmgr/26.png
- CytoscapeSession-2019_09_26-21_57/apps/org.cytoscape.ding.customgraphicsmgr/18.png
- CytoscapeSession-2019_09_26-21_57/apps/org.cytoscape.ding.customgraphicsmgr/30.png
- CytoscapeSession-2019_09_26-21_57/apps/org.cytoscape.ding.customgraphicsmgr/24.png
- CytoscapeSession-2019_09_26-21_57/apps/org.cytoscape.ding.customgraphicsmgr/25.png
- CytoscapeSession-2019_09_26-21_57/apps/org.cytoscape.ding.customgraphicsmgr/31.png
- CytoscapeSession-2019_09_26-21_57/apps/org.cytoscape.ding.customgraphicsmgr/19.png
- CytoscapeSession-2019_09_26-21_57/apps/org.cytoscape.ding.customgraphicsmgr/4.png
- CytoscapeSession-2019_09_26-21_57/apps/org.cytoscape.ding.customgraphicsmgr/42.png
- CytoscapeSession-2019_09_26-21_57/apps/org.cytoscape.ding.customgraphicsmgr/43.png
- CytoscapeSession-2019_09_26-21_57/apps/org.cytoscape.ding.customgraphicsmgr/5.png
- CytoscapeSession-2019_09_26-21_57/apps/org.cytoscape.ding.customgraphicsmgr/7.png
- CytoscapeSession-2019_09_26-21_57/apps/org.cytoscape.ding.customgraphicsmgr/6.png
- CytoscapeSession-2019_09_26-21_57/apps/org.cytoscape.ding.customgraphicsmgr/2.png
- CytoscapeSession-2019_09_26-21_57/apps/org.cytoscape.ding.customgraphicsmgr/3.png
- CytoscapeSession-2019_09_26-21_57/apps/org.cytoscape.ding.customgraphicsmgr/1.png
- CytoscapeSession-2019_09_26-21_57/apps/org.cytoscape.swing-application/session_state.xml
- CytoscapeSession-2019_09_26-21_57/apps/org.cytoscape.swing-application/network_list.xml
- CytoscapeSession-2019_09_26-21_57/apps/org.cytoscape.filter/filters.json
- CytoscapeSession-2019_09_26-21_57/apps/org.cytoscape.filter/filterChains.json
- CytoscapeSession-2019_09_26-21_57/apps/org.cytoscape.browser/UnassignedTables.props
- CytoscapeSession-2019_09_26-21_57/apps/org.cytoscape.browser/EdgeTable.props
- CytoscapeSession-2019_09_26-21_57/apps/org.cytoscape.browser/NodeTable.props
- CytoscapeSession-2019_09_26-21_57/apps/org.cytoscape.browser/NetworkTable.props
