# Supplementary material for: Regulatory network analysis of Paneth cell and goblet cell enriched gut organoids using transcriptomics approaches
Source: Royal Society of Chemistry journal article supplement (doi:10.1039/c9mo00130a), 2019-12-10
Supplement: c9mo00130a2.cys [file c9mo00130a2.cys › CytoscapeSession-2019_09_26-21_57/apps/org.cytoscape.browser/EdgeTable.props]

1: Cluster 1 (Score: 8.022) default edge	0	SUID	false
1: Cluster 1 (Score: 8.022) default edge	1	selected	false
1: Cluster 1 (Score: 8.022) default edge	2	shared name	true
1: Cluster 1 (Score: 8.022) default edge	3	shared interaction	true
1: Cluster 1 (Score: 8.022) default edge	4	name	true
1: Cluster 1 (Score: 8.022) default edge	5	interaction	true
1: Cluster 1 (Score: 8.022) default edge	6	isInPath	true
1: Cluster 1 (Score: 8.022) default edge	7	Module_Edge_Color	true
1: Cluster 4 (Score: 3.714) default edge	0	SUID	false
1: Cluster 4 (Score: 3.714) default edge	1	selected	false
1: Cluster 4 (Score: 3.714) default edge	2	shared name	true
1: Cluster 4 (Score: 3.714) default edge	3	shared interaction	true
1: Cluster 4 (Score: 3.714) default edge	4	name	true
1: Cluster 4 (Score: 3.714) default edge	5	interaction	true
1: Cluster 4 (Score: 3.714) default edge	6	isInPath	true
1: Cluster 4 (Score: 3.714) default edge	7	Module_Edge_Color	true
1: Cluster 5 (Score: 3.333) default edge	0	SUID	false
1: Cluster 5 (Score: 3.333) default edge	1	selected	false
1: Cluster 5 (Score: 3.333) default edge	2	shared name	true
1: Cluster 5 (Score: 3.333) default edge	3	shared interaction	true
1: Cluster 5 (Score: 3.333) default edge	4	name	true
1: Cluster 5 (Score: 3.333) default edge	5	interaction	true
1: Cluster 5 (Score: 3.333) default edge	6	isInPath	true
1: Cluster 5 (Score: 3.333) default edge	7	Module_Edge_Color	true
1: Cluster 7 (Score: 2.667) default edge	0	SUID	false
1: Cluster 7 (Score: 2.667) default edge	1	selected	false
1: Cluster 7 (Score: 2.667) default edge	2	shared name	true
1: Cluster 7 (Score: 2.667) default edge	3	shared interaction	true
1: Cluster 7 (Score: 2.667) default edge	4	name	true
1: Cluster 7 (Score: 2.667) default edge	5	interaction	true
1: Cluster 7 (Score: 2.667) default edge	6	isInPath	true
1: Cluster 7 (Score: 2.667) default edge	7	Module_Edge_Color	true
1: Cluster 3 (Score: 5.923) default edge	0	SUID	false
1: Cluster 3 (Score: 5.923) default edge	1	selected	false
1: Cluster 3 (Score: 5.923) default edge	2	shared name	true
1: Cluster 3 (Score: 5.923) default edge	3	shared interaction	true
1: Cluster 3 (Score: 5.923) default edge	4	name	true
1: Cluster 3 (Score: 5.923) default edge	5	interaction	true
1: Cluster 3 (Score: 5.923) default edge	6	isInPath	true
1: Cluster 3 (Score: 5.923) default edge	7	Module_Edge_Color	true
1: Cluster 6 (Score: 2.667) default edge	0	SUID	false
1: Cluster 6 (Score: 2.667) default edge	1	selected	false
1: Cluster 6 (Score: 2.667) default edge	2	shared name	true
1: Cluster 6 (Score: 2.667) default edge	3	shared interaction	true
1: Cluster 6 (Score: 2.667) default edge	4	name	true
1: Cluster 6 (Score: 2.667) default edge	5	interaction	true
1: Cluster 6 (Score: 2.667) default edge	6	isInPath	true
1: Cluster 6 (Score: 2.667) default edge	7	Module_Edge_Color	true
Gob_network_lfc1.txt default edge	0	SUID	false
Gob_network_lfc1.txt default edge	1	selected	false
Gob_network_lfc1.txt default edge	2	shared name	true
Gob_network_lfc1.txt default edge	3	shared interaction	true
Gob_network_lfc1.txt default edge	4	name	true
Gob_network_lfc1.txt default edge	5	interaction	true
Gob_network_lfc1.txt default edge	6	isInPath	true
Gob_network_lfc1.txt default edge	7	Module_Edge_Color	true
1: Cluster 2 (Score: 7.429) default edge	0	SUID	false
1: Cluster 2 (Score: 7.429) default edge	1	selected	false
1: Cluster 2 (Score: 7.429) default edge	2	shared name	true
1: Cluster 2 (Score: 7.429) default edge	3	shared interaction	true
1: Cluster 2 (Score: 7.429) default edge	4	name	true
1: Cluster 2 (Score: 7.429) default edge	5	interaction	true
1: Cluster 2 (Score: 7.429) default edge	6	isInPath	true
1: Cluster 2 (Score: 7.429) default edge	7	Module_Edge_Color	true
