# Supplementary material for: Regulatory network analysis of Paneth cell and goblet cell enriched gut organoids using transcriptomics approaches
Source: Royal Society of Chemistry journal article supplement (doi:10.1039/c9mo00130a), 2019-12-10
Supplement: c9mo00130a2.cys [file c9mo00130a2.cys › CytoscapeSession-2019_09_26-21_57/apps/org.cytoscape.browser/NetworkTable.props]

1: Cluster 1 (Score: 8.022) default network	0	SUID	false
1: Cluster 1 (Score: 8.022) default network	1	selected	false
1: Cluster 1 (Score: 8.022) default network	2	shared name	true
1: Cluster 1 (Score: 8.022) default network	3	name	true
1: Cluster 1 (Score: 8.022) default network	4	__Annotations	true
1: Cluster 5 (Score: 3.333) default network	0	SUID	false
1: Cluster 5 (Score: 3.333) default network	1	selected	false
1: Cluster 5 (Score: 3.333) default network	2	shared name	true
1: Cluster 5 (Score: 3.333) default network	3	name	true
1: Cluster 5 (Score: 3.333) default network	4	__Annotations	true
1: Cluster 3 (Score: 5.923) default network	0	SUID	false
1: Cluster 3 (Score: 5.923) default network	1	selected	false
1: Cluster 3 (Score: 5.923) default network	2	shared name	true
1: Cluster 3 (Score: 5.923) default network	3	name	true
1: Cluster 3 (Score: 5.923) default network	4	__Annotations	true
Gob_network_lfc1.txt default network	0	SUID	false
Gob_network_lfc1.txt default network	1	selected	false
Gob_network_lfc1.txt default network	2	shared name	true
Gob_network_lfc1.txt default network	3	name	true
Gob_network_lfc1.txt default network	4	__Annotations	true
1: Cluster 4 (Score: 3.714) default network	0	SUID	false
1: Cluster 4 (Score: 3.714) default network	1	selected	false
1: Cluster 4 (Score: 3.714) default network	2	shared name	true
1: Cluster 4 (Score: 3.714) default network	3	name	true
1: Cluster 4 (Score: 3.714) default network	4	__Annotations	true
1: Cluster 6 (Score: 2.667) default network	0	SUID	false
1: Cluster 6 (Score: 2.667) default network	1	selected	false
1: Cluster 6 (Score: 2.667) default network	2	shared name	true
1: Cluster 6 (Score: 2.667) default network	3	name	true
1: Cluster 6 (Score: 2.667) default network	4	__Annotations	true
1: Cluster 7 (Score: 2.667) default network	0	SUID	false
1: Cluster 7 (Score: 2.667) default network	1	selected	false
1: Cluster 7 (Score: 2.667) default network	2	shared name	true
1: Cluster 7 (Score: 2.667) default network	3	name	true
1: Cluster 7 (Score: 2.667) default network	4	__Annotations	true
1: Cluster 2 (Score: 7.429) default network	0	SUID	false
1: Cluster 2 (Score: 7.429) default network	1	selected	false
1: Cluster 2 (Score: 7.429) default network	2	shared name	true
1: Cluster 2 (Score: 7.429) default network	3	name	true
1: Cluster 2 (Score: 7.429) default network	4	__Annotations	true
