# Supplementary material for: Regulatory network analysis of Paneth cell and goblet cell enriched gut organoids using transcriptomics approaches
Source: Royal Society of Chemistry journal article supplement (doi:10.1039/c9mo00130a), 2019-12-10
Supplement: c9mo00130a2.cys [file c9mo00130a2.cys › CytoscapeSession-2019_09_26-21_57/apps/org.cytoscape.browser/NodeTable.props]

1: Cluster 3 (Score: 5.923) default node	0	SUID	false
1: Cluster 3 (Score: 5.923) default node	1	selected	false
1: Cluster 3 (Score: 5.923) default node	2	shared name	true
1: Cluster 3 (Score: 5.923) default node	3	name	true
1: Cluster 3 (Score: 5.923) default node	4	isExcludedFromPaths	true
1: Cluster 3 (Score: 5.923) default node	5	isInPath	true
1: Cluster 3 (Score: 5.923) default node	6	MCODE_Cluster	true
1: Cluster 3 (Score: 5.923) default node	7	MCODE_Node_Status	true
1: Cluster 3 (Score: 5.923) default node	8	MCODE_Score	true
1: Cluster 3 (Score: 5.923) default node	9	Cluster	true
1: Cluster 3 (Score: 5.923) default node	10	Node_Status	true
1: Cluster 3 (Score: 5.923) default node	11	Score	true
1: Cluster 3 (Score: 5.923) default node	12	genesymbol	true
1: Cluster 3 (Score: 5.923) default node	13	chea3_Rank	true
1: Cluster 3 (Score: 5.923) default node	14	chea3_Score	true
1: Cluster 3 (Score: 5.923) default node	15	chea3_Library	true
1: Cluster 3 (Score: 5.923) default node	16	chea3_Overlapping_Genes	true
1: Cluster 2 (Score: 7.429) default node	0	SUID	false
1: Cluster 2 (Score: 7.429) default node	1	selected	false
1: Cluster 2 (Score: 7.429) default node	2	shared name	true
1: Cluster 2 (Score: 7.429) default node	3	name	true
1: Cluster 2 (Score: 7.429) default node	4	isExcludedFromPaths	true
1: Cluster 2 (Score: 7.429) default node	5	isInPath	true
1: Cluster 2 (Score: 7.429) default node	6	MCODE_Cluster	true
1: Cluster 2 (Score: 7.429) default node	7	MCODE_Node_Status	true
1: Cluster 2 (Score: 7.429) default node	8	MCODE_Score	true
1: Cluster 2 (Score: 7.429) default node	9	Cluster	true
1: Cluster 2 (Score: 7.429) default node	10	Node_Status	true
1: Cluster 2 (Score: 7.429) default node	11	Score	true
1: Cluster 2 (Score: 7.429) default node	12	genesymbol	true
1: Cluster 2 (Score: 7.429) default node	13	chea3_Rank	true
1: Cluster 2 (Score: 7.429) default node	14	chea3_Score	true
1: Cluster 2 (Score: 7.429) default node	15	chea3_Library	true
1: Cluster 2 (Score: 7.429) default node	16	chea3_Overlapping_Genes	true
1: Cluster 4 (Score: 3.714) default node	0	SUID	false
1: Cluster 4 (Score: 3.714) default node	1	selected	false
1: Cluster 4 (Score: 3.714) default node	2	shared name	true
1: Cluster 4 (Score: 3.714) default node	3	name	true
1: Cluster 4 (Score: 3.714) default node	4	isExcludedFromPaths	true
1: Cluster 4 (Score: 3.714) default node	5	isInPath	true
1: Cluster 4 (Score: 3.714) default node	6	MCODE_Cluster	true
1: Cluster 4 (Score: 3.714) default node	7	MCODE_Node_Status	true
1: Cluster 4 (Score: 3.714) default node	8	MCODE_Score	true
1: Cluster 4 (Score: 3.714) default node	9	Cluster	true
1: Cluster 4 (Score: 3.714) default node	10	Node_Status	true
1: Cluster 4 (Score: 3.714) default node	11	Score	true
1: Cluster 4 (Score: 3.714) default node	12	genesymbol	true
1: Cluster 4 (Score: 3.714) default node	13	chea3_Rank	true
1: Cluster 4 (Score: 3.714) default node	14	chea3_Score	true
1: Cluster 4 (Score: 3.714) default node	15	chea3_Library	true
1: Cluster 4 (Score: 3.714) default node	16	chea3_Overlapping_Genes	true
Gob_network_lfc1.txt default node	0	SUID	false
Gob_network_lfc1.txt default node	1	selected	false
Gob_network_lfc1.txt default node	2	shared name	true
Gob_network_lfc1.txt default node	3	name	true
Gob_network_lfc1.txt default node	4	isExcludedFromPaths	true
Gob_network_lfc1.txt default node	5	isInPath	true
Gob_network_lfc1.txt default node	6	MCODE_Cluster	true
Gob_network_lfc1.txt default node	7	MCODE_Node_Status	true
Gob_network_lfc1.txt default node	8	MCODE_Score	true
Gob_network_lfc1.txt default node	9	Cluster	true
Gob_network_lfc1.txt default node	10	Node_Status	true
Gob_network_lfc1.txt default node	11	Score	true
Gob_network_lfc1.txt default node	12	genesymbol	true
Gob_network_lfc1.txt default node	13	chea3_Rank	true
Gob_network_lfc1.txt default node	14	chea3_Score	true
Gob_network_lfc1.txt default node	15	chea3_Library	true
Gob_network_lfc1.txt default node	16	chea3_Overlapping_Genes	true
1: Cluster 5 (Score: 3.333) default node	0	SUID	false
1: Cluster 5 (Score: 3.333) default node	1	selected	false
1: Cluster 5 (Score: 3.333) default node	2	shared name	true
1: Cluster 5 (Score: 3.333) default node	3	name	true
1: Cluster 5 (Score: 3.333) default node	4	isExcludedFromPaths	true
1: Cluster 5 (Score: 3.333) default node	5	isInPath	true
1: Cluster 5 (Score: 3.333) default node	6	MCODE_Cluster	true
1: Cluster 5 (Score: 3.333) default node	7	MCODE_Node_Status	true
1: Cluster 5 (Score: 3.333) default node	8	MCODE_Score	true
1: Cluster 5 (Score: 3.333) default node	9	Cluster	true
1: Cluster 5 (Score: 3.333) default node	10	Node_Status	true
1: Cluster 5 (Score: 3.333) default node	11	Score	true
1: Cluster 5 (Score: 3.333) default node	12	genesymbol	true
1: Cluster 5 (Score: 3.333) default node	13	chea3_Rank	true
1: Cluster 5 (Score: 3.333) default node	14	chea3_Score	true
1: Cluster 5 (Score: 3.333) default node	15	chea3_Library	true
1: Cluster 5 (Score: 3.333) default node	16	chea3_Overlapping_Genes	true
1: Cluster 6 (Score: 2.667) default node	0	SUID	false
1: Cluster 6 (Score: 2.667) default node	1	selected	false
1: Cluster 6 (Score: 2.667) default node	2	shared name	true
1: Cluster 6 (Score: 2.667) default node	3	name	true
1: Cluster 6 (Score: 2.667) default node	4	isExcludedFromPaths	true
1: Cluster 6 (Score: 2.667) default node	5	isInPath	true
1: Cluster 6 (Score: 2.667) default node	6	MCODE_Cluster	true
1: Cluster 6 (Score: 2.667) default node	7	MCODE_Node_Status	true
1: Cluster 6 (Score: 2.667) default node	8	MCODE_Score	true
1: Cluster 6 (Score: 2.667) default node	9	Cluster	true
1: Cluster 6 (Score: 2.667) default node	10	Node_Status	true
1: Cluster 6 (Score: 2.667) default node	11	Score	true
1: Cluster 6 (Score: 2.667) default node	12	genesymbol	true
1: Cluster 6 (Score: 2.667) default node	13	chea3_Rank	true
1: Cluster 6 (Score: 2.667) default node	14	chea3_Score	true
1: Cluster 6 (Score: 2.667) default node	15	chea3_Library	true
1: Cluster 6 (Score: 2.667) default node	16	chea3_Overlapping_Genes	true
1: Cluster 7 (Score: 2.667) default node	0	SUID	false
1: Cluster 7 (Score: 2.667) default node	1	selected	false
1: Cluster 7 (Score: 2.667) default node	2	shared name	true
1: Cluster 7 (Score: 2.667) default node	3	name	true
1: Cluster 7 (Score: 2.667) default node	4	isExcludedFromPaths	true
1: Cluster 7 (Score: 2.667) default node	5	isInPath	true
1: Cluster 7 (Score: 2.667) default node	6	MCODE_Cluster	true
1: Cluster 7 (Score: 2.667) default node	7	MCODE_Node_Status	true
1: Cluster 7 (Score: 2.667) default node	8	MCODE_Score	true
1: Cluster 7 (Score: 2.667) default node	9	Cluster	true
1: Cluster 7 (Score: 2.667) default node	10	Node_Status	true
1: Cluster 7 (Score: 2.667) default node	11	Score	true
1: Cluster 7 (Score: 2.667) default node	12	genesymbol	true
1: Cluster 7 (Score: 2.667) default node	13	chea3_Rank	true
1: Cluster 7 (Score: 2.667) default node	14	chea3_Score	true
1: Cluster 7 (Score: 2.667) default node	15	chea3_Library	true
1: Cluster 7 (Score: 2.667) default node	16	chea3_Overlapping_Genes	true
1: Cluster 1 (Score: 8.022) default node	0	SUID	false
1: Cluster 1 (Score: 8.022) default node	1	selected	false
1: Cluster 1 (Score: 8.022) default node	2	shared name	true
1: Cluster 1 (Score: 8.022) default node	3	name	true
1: Cluster 1 (Score: 8.022) default node	4	isExcludedFromPaths	true
1: Cluster 1 (Score: 8.022) default node	5	isInPath	true
1: Cluster 1 (Score: 8.022) default node	6	MCODE_Cluster	true
1: Cluster 1 (Score: 8.022) default node	7	MCODE_Node_Status	true
1: Cluster 1 (Score: 8.022) default node	8	MCODE_Score	true
1: Cluster 1 (Score: 8.022) default node	9	Cluster	true
1: Cluster 1 (Score: 8.022) default node	10	Node_Status	true
1: Cluster 1 (Score: 8.022) default node	11	Score	true
1: Cluster 1 (Score: 8.022) default node	12	genesymbol	true
1: Cluster 1 (Score: 8.022) default node	13	chea3_Rank	true
1: Cluster 1 (Score: 8.022) default node	14	chea3_Score	true
1: Cluster 1 (Score: 8.022) default node	15	chea3_Library	true
1: Cluster 1 (Score: 8.022) default node	16	chea3_Overlapping_Genes	true
