# Supplementary material for: Regulatory network analysis of Paneth cell and goblet cell enriched gut organoids using transcriptomics approaches
Source: Royal Society of Chemistry journal article supplement (doi:10.1039/c9mo00130a), 2019-12-10
Supplement: c9mo00130a2.cys [file c9mo00130a2.cys › CytoscapeSession-2019_09_26-21_57/apps/org.cytoscape.swing-application/network_list.xml]

<?xml version="1.0" encoding="UTF-8" standalone="yes"?>
<networkList>
    <network id="21411" order="0"/>
    <network id="21381" order="1"/>
    <network id="21431" order="2"/>
    <network id="21401" order="3"/>
    <network id="21371" order="4"/>
    <network id="21421" order="5"/>
    <network id="62" order="6"/>
    <network id="21391" order="7"/>
</networkList>
