# Supplementary material for: Regulatory network analysis of Paneth cell and goblet cell enriched gut organoids using transcriptomics approaches
Source: Royal Society of Chemistry journal article supplement (doi:10.1039/c9mo00130a), 2019-12-10
Supplement: c9mo00130a2.cys [file c9mo00130a2.cys › CytoscapeSession-2019_09_26-21_57/networks/36-Gob_network_lfc1.txt.xgmml]

<?xml version="1.0" encoding="UTF-8" standalone="yes"?>
<graph id="36" label="Gob_network_lfc1.txt" cy:view="0" cy:registered="0" cy:documentVersion="3.0" xmlns:dc="http://purl.org/dc/elements/1.1/" xmlns:xlink="http://www.w3.org/1999/xlink" xmlns:rdf="http://www.w3.org/1999/02/22-rdf-syntax-ns#" xmlns:cy="http://www.cytoscape.org" xmlns="http://www.cs.rpi.edu/XGMML">
  <att>
    <graph id="52" label="52" cy:registered="0">
    </graph>
  </att>
  <att>
    <graph id="62" label="Gob_network_lfc1.txt" cy:registered="1">
      <node id="2197" label="ENSMUSG00000010175"/>
      <node id="2196" label="ENSMUSG00000029275"/>
      <node id="2195" label="ENSMUSG00000017146"/>
      <node id="2194" label="ENSMUSG00000027323"/>
      <node id="2193" label="ENSMUSG00000041147"/>
      <node id="2192" label="ENSMUSG00000017861"/>
      <node id="2191" label="ENSMUSG00000027793"/>
      <node id="2190" label="ENSMUSG00000018899"/>
      <node id="2189" label="ENSMUSG00000039236"/>
      <node id="2188" label="ENSMUSG00000022346"/>
      <node id="2187" label="ENSMUSG00000027381"/>
      <node id="2186" label="ENSMUSG00000027490"/>
      <node id="2185" label="ENSMUSG00000022479"/>
      <node id="2184" label="ENSMUSG00000029727"/>
      <node id="2183" label="ENSMUSG00000030483"/>
      <node id="2182" label="ENSMUSG00000024431"/>
      <node id="2181" label="ENSMUSG00000003814"/>
      <node id="2180" label="ENSMUSG00000035864"/>
      <node id="2179" label="ENSMUSG00000026565"/>
      <node id="2178" label="ENSMUSG00000024590"/>
      <node id="2177" label="ENSMUSG00000026923"/>
      <node id="2176" label="ENSMUSG00000027314"/>
      <node id="2175" label="ENSMUSG00000048001"/>
      <node id="2174" label="ENSMUSG00000070348"/>
      <node id="2173" label="ENSMUSG00000002109"/>
      <node id="2172" label="ENSMUSG00000006398"/>
      <node id="2171" label="ENSMUSG00000006678"/>
      <node id="2170" label="ENSMUSG00000017499"/>
      <node id="2169" label="ENSMUSG00000019942"/>
      <node id="2168" label="ENSMUSG00000027342"/>
      <node id="2167" label="ENSMUSG00000027602"/>
      <node id="2166" label="ENSMUSG00000027641"/>
      <node id="2165" label="ENSMUSG00000027715"/>
      <node id="2164" label="ENSMUSG00000028884"/>
      <node id="2163" label="ENSMUSG00000029521"/>
      <node id="2162" label="ENSMUSG00000032380"/>
      <node id="2161" label="ENSMUSG00000041431"/>
      <node id="2160" label="ENSMUSG00000054115"/>
      <node id="2159" label="ENSMUSG00000034771"/>
      <node id="2158" label="ENSMUSG00000022528"/>
      <node id="2157" label="ENSMUSG00000035158"/>
      <node id="2156" label="ENSMUSG00000027168"/>
      <node id="2155" label="ENSMUSG00000037583"/>
      <node id="2154" label="ENSMUSG00000026398"/>
      <node id="2153" label="ENSMUSG00000000782"/>
      <node id="2152" label="ENSMUSG00000000142"/>
      <node id="2151" label="ENSMUSG00000000317"/>
      <node id="2150" label="ENSMUSG00000000594"/>
      <node id="2149" label="ENSMUSG00000001120"/>
      <node id="2148" label="ENSMUSG00000001403"/>
      <node id="2147" label="ENSMUSG00000002227"/>
      <node id="2146" label="ENSMUSG00000002489"/>
      <node id="2145" label="ENSMUSG00000002565"/>
      <node id="2144" label="ENSMUSG00000002835"/>
      <node id="2143" label="ENSMUSG00000002870"/>
      <node id="2142" label="ENSMUSG00000002885"/>
      <node id="2141" label="ENSMUSG00000002997"/>
      <node id="2140" label="ENSMUSG00000003032"/>
      <node id="2139" label="ENSMUSG00000003134"/>
      <node id="2138" label="ENSMUSG00000003273"/>
      <node id="2137" label="ENSMUSG00000003545"/>
      <node id="2136" label="ENSMUSG00000003992"/>
      <node id="2135" label="ENSMUSG00000004151"/>
      <node id="2134" label="ENSMUSG00000005267"/>
      <node id="2133" label="ENSMUSG00000005370"/>
      <node id="2132" label="ENSMUSG00000005410"/>
      <node id="2131" label="ENSMUSG00000005533"/>
      <node id="2130" label="ENSMUSG00000005973"/>
      <node id="2129" label="ENSMUSG00000006494"/>
      <node id="2128" label="ENSMUSG00000006715"/>
      <node id="2127" label="ENSMUSG00000006784"/>
      <node id="2126" label="ENSMUSG00000007207"/>
      <node id="2125" label="ENSMUSG00000007827"/>
      <node id="2124" label="ENSMUSG00000009292"/>
      <node id="2123" label="ENSMUSG00000009575"/>
      <node id="2122" label="ENSMUSG00000010362"/>
      <node id="2121" label="ENSMUSG00000011148"/>
      <node id="2120" label="ENSMUSG00000012443"/>
      <node id="2119" label="ENSMUSG00000014786"/>
      <node id="2118" label="ENSMUSG00000015745"/>
      <node id="2117" label="ENSMUSG00000015880"/>
      <node id="2116" label="ENSMUSG00000016526"/>
      <node id="2115" label="ENSMUSG00000017165"/>
      <node id="2114" label="ENSMUSG00000017446"/>
      <node id="2113" label="ENSMUSG00000017466"/>
      <node id="2112" label="ENSMUSG00000017493"/>
      <node id="2111" label="ENSMUSG00000017550"/>
      <node id="2110" label="ENSMUSG00000017716"/>
      <node id="2109" label="ENSMUSG00000018340"/>
      <node id="2108" label="ENSMUSG00000018740"/>
      <node id="2107" label="ENSMUSG00000019066"/>
      <node id="2106" label="ENSMUSG00000019302"/>
      <node id="2105" label="ENSMUSG00000019303"/>
      <node id="2104" label="ENSMUSG00000019564"/>
      <node id="2103" label="ENSMUSG00000019773"/>
      <node id="2102" label="ENSMUSG00000019796"/>
      <node id="2101" label="ENSMUSG00000019831"/>
      <node id="2100" label="ENSMUSG00000019947"/>
      <node id="2099" label="ENSMUSG00000019982"/>
      <node id="2098" label="ENSMUSG00000019986"/>
      <node id="2097" label="ENSMUSG00000020034"/>
      <node id="2096" label="ENSMUSG00000020185"/>
      <node id="2095" label="ENSMUSG00000020230"/>
      <node id="2094" label="ENSMUSG00000020261"/>
      <node id="2093" label="ENSMUSG00000020471"/>
      <node id="2092" label="ENSMUSG00000020493"/>
      <node id="2091" label="ENSMUSG00000020573"/>
      <node id="2090" label="ENSMUSG00000020577"/>
      <node id="2089" label="ENSMUSG00000020649"/>
      <node id="2088" label="ENSMUSG00000020668"/>
      <node id="2087" label="ENSMUSG00000020712"/>
      <node id="2086" label="ENSMUSG00000020741"/>
      <node id="2085" label="ENSMUSG00000020788"/>
      <node id="2084" label="ENSMUSG00000020814"/>
      <node id="2083" label="ENSMUSG00000020846"/>
      <node id="2082" label="ENSMUSG00000020873"/>
      <node id="2081" label="ENSMUSG00000020897"/>
      <node id="2080" label="ENSMUSG00000020901"/>
      <node id="2079" label="ENSMUSG00000020914"/>
      <node id="2078" label="ENSMUSG00000021115"/>
      <node id="2077" label="ENSMUSG00000021221"/>
      <node id="2076" label="ENSMUSG00000021223"/>
      <node id="2075" label="ENSMUSG00000021391"/>
      <node id="2074" label="ENSMUSG00000021453"/>
      <node id="2073" label="ENSMUSG00000021725"/>
      <node id="2072" label="ENSMUSG00000021728"/>
      <node id="2071" label="ENSMUSG00000021811"/>
      <node id="2070" label="ENSMUSG00000021831"/>
      <node id="2069" label="ENSMUSG00000021876"/>
      <node id="2068" label="ENSMUSG00000022003"/>
      <node id="2067" label="ENSMUSG00000022048"/>
      <node id="2066" label="ENSMUSG00000022136"/>
      <node id="2065" label="ENSMUSG00000022148"/>
      <node id="2064" label="ENSMUSG00000022177"/>
      <node id="2063" label="ENSMUSG00000022253"/>
      <node id="2062" label="ENSMUSG00000022360"/>
      <node id="2061" label="ENSMUSG00000022385"/>
      <node id="2060" label="ENSMUSG00000022436"/>
      <node id="2059" label="ENSMUSG00000022519"/>
      <node id="2058" label="ENSMUSG00000022619"/>
      <node id="2057" label="ENSMUSG00000022673"/>
      <node id="2056" label="ENSMUSG00000022748"/>
      <node id="2055" label="ENSMUSG00000022762"/>
      <node id="2054" label="ENSMUSG00000022864"/>
      <node id="2053" label="ENSMUSG00000022900"/>
      <node id="2052" label="ENSMUSG00000022912"/>
      <node id="2051" label="ENSMUSG00000022945"/>
      <node id="2050" label="ENSMUSG00000023004"/>
      <node id="2049" label="ENSMUSG00000023008"/>
      <node id="2048" label="ENSMUSG00000023009"/>
      <node id="2047" label="ENSMUSG00000023015"/>
      <node id="2046" label="ENSMUSG00000023017"/>
      <node id="2045" label="ENSMUSG00000023032"/>
      <node id="2044" label="ENSMUSG00000023224"/>
      <node id="2043" label="ENSMUSG00000023236"/>
      <node id="2042" label="ENSMUSG00000023272"/>
      <node id="2041" label="ENSMUSG00000023940"/>
      <node id="2040" label="ENSMUSG00000024063"/>
      <node id="2039" label="ENSMUSG00000024193"/>
      <node id="2038" label="ENSMUSG00000024232"/>
      <node id="2037" label="ENSMUSG00000024299"/>
      <node id="2036" label="ENSMUSG00000024301"/>
      <node id="2035" label="ENSMUSG00000024516"/>
      <node id="2034" label="ENSMUSG00000024525"/>
      <node id="2033" label="ENSMUSG00000024542"/>
      <node id="2032" label="ENSMUSG00000024575"/>
      <node id="2031" label="ENSMUSG00000024597"/>
      <node id="2030" label="ENSMUSG00000024644"/>
      <node id="2029" label="ENSMUSG00000024774"/>
      <node id="2028" label="ENSMUSG00000024777"/>
      <node id="2027" label="ENSMUSG00000024795"/>
      <node id="2026" label="ENSMUSG00000024858"/>
      <node id="2025" label="ENSMUSG00000024891"/>
      <node id="2024" label="ENSMUSG00000024978"/>
      <node id="2023" label="ENSMUSG00000024989"/>
      <node id="2022" label="ENSMUSG00000025001"/>
      <node id="2021" label="ENSMUSG00000025019"/>
      <node id="2020" label="ENSMUSG00000025154"/>
      <node id="2019" label="ENSMUSG00000025351"/>
      <node id="2018" label="ENSMUSG00000025352"/>
      <node id="2017" label="ENSMUSG00000025576"/>
      <node id="2016" label="ENSMUSG00000025584"/>
      <node id="2015" label="ENSMUSG00000025758"/>
      <node id="2014" label="ENSMUSG00000025912"/>
      <node id="2013" label="ENSMUSG00000026196"/>
      <node id="2012" label="ENSMUSG00000026281"/>
      <node id="2011" label="ENSMUSG00000026360"/>
      <node id="2010" label="ENSMUSG00000026429"/>
      <node id="2009" label="ENSMUSG00000026504"/>
      <node id="2008" label="ENSMUSG00000026509"/>
      <node id="2007" label="ENSMUSG00000026546"/>
      <node id="2006" label="ENSMUSG00000026605"/>
      <node id="2005" label="ENSMUSG00000026683"/>
      <node id="2004" label="ENSMUSG00000026728"/>
      <node id="2003" label="ENSMUSG00000026779"/>
      <node id="2002" label="ENSMUSG00000026785"/>
      <node id="2001" label="ENSMUSG00000026786"/>
      <node id="2000" label="ENSMUSG00000026879"/>
      <node id="1999" label="ENSMUSG00000026921"/>
      <node id="1998" label="ENSMUSG00000027006"/>
      <node id="1997" label="ENSMUSG00000027009"/>
      <node id="1996" label="ENSMUSG00000027075"/>
      <node id="1995" label="ENSMUSG00000027230"/>
      <node id="1994" label="ENSMUSG00000027242"/>
      <node id="1993" label="ENSMUSG00000027249"/>
      <node id="1992" label="ENSMUSG00000027326"/>
      <node id="1991" label="ENSMUSG00000027454"/>
      <node id="1990" label="ENSMUSG00000027469"/>
      <node id="1989" label="ENSMUSG00000027513"/>
      <node id="1988" label="ENSMUSG00000027514"/>
      <node id="1987" label="ENSMUSG00000027533"/>
      <node id="1986" label="ENSMUSG00000027611"/>
      <node id="1985" label="ENSMUSG00000027654"/>
      <node id="1984" label="ENSMUSG00000027752"/>
      <node id="1983" label="ENSMUSG00000027763"/>
      <node id="1982" label="ENSMUSG00000027834"/>
      <node id="1981" label="ENSMUSG00000027878"/>
      <node id="1980" label="ENSMUSG00000027994"/>
      <node id="1979" label="ENSMUSG00000028212"/>
      <node id="1978" label="ENSMUSG00000028282"/>
      <node id="1977" label="ENSMUSG00000028312"/>
      <node id="1976" label="ENSMUSG00000028341"/>
      <node id="1975" label="ENSMUSG00000028439"/>
      <node id="1974" label="ENSMUSG00000028560"/>
      <node id="1973" label="ENSMUSG00000028581"/>
      <node id="1972" label="ENSMUSG00000028602"/>
      <node id="1971" label="ENSMUSG00000028614"/>
      <node id="1970" label="ENSMUSG00000028633"/>
      <node id="1969" label="ENSMUSG00000028634"/>
      <node id="1968" label="ENSMUSG00000028641"/>
      <node id="1967" label="ENSMUSG00000028678"/>
      <node id="1966" label="ENSMUSG00000028699"/>
      <node id="1965" label="ENSMUSG00000028702"/>
      <node id="1964" label="ENSMUSG00000028718"/>
      <node id="1963" label="ENSMUSG00000028832"/>
      <node id="1962" label="ENSMUSG00000028874"/>
      <node id="1961" label="ENSMUSG00000028909"/>
      <node id="1960" label="ENSMUSG00000029163"/>
      <node id="1959" label="ENSMUSG00000029166"/>
      <node id="1958" label="ENSMUSG00000029185"/>
      <node id="1957" label="ENSMUSG00000029312"/>
      <node id="1956" label="ENSMUSG00000029343"/>
      <node id="1955" label="ENSMUSG00000029408"/>
      <node id="1954" label="ENSMUSG00000029414"/>
      <node id="1953" label="ENSMUSG00000029470"/>
      <node id="1952" label="ENSMUSG00000029516"/>
      <node id="1951" label="ENSMUSG00000029601"/>
      <node id="1950" label="ENSMUSG00000029630"/>
      <node id="1949" label="ENSMUSG00000029650"/>
      <node id="1948" label="ENSMUSG00000029828"/>
      <node id="1947" label="ENSMUSG00000029847"/>
      <node id="1946" label="ENSMUSG00000029875"/>
      <node id="1945" label="ENSMUSG00000029910"/>
      <node id="1944" label="ENSMUSG00000030029"/>
      <node id="1943" label="ENSMUSG00000030107"/>
      <node id="1942" label="ENSMUSG00000030199"/>
      <node id="1941" label="ENSMUSG00000030275"/>
      <node id="1940" label="ENSMUSG00000030346"/>
      <node id="1939" label="ENSMUSG00000030407"/>
      <node id="1938" label="ENSMUSG00000030528"/>
      <node id="1937" label="ENSMUSG00000030643"/>
      <node id="1936" label="ENSMUSG00000030671"/>
      <node id="1935" label="ENSMUSG00000030830"/>
      <node id="1934" label="ENSMUSG00000031004"/>
      <node id="1933" label="ENSMUSG00000031129"/>
      <node id="1932" label="ENSMUSG00000031367"/>
      <node id="1931" label="ENSMUSG00000031453"/>
      <node id="1930" label="ENSMUSG00000031617"/>
      <node id="1929" label="ENSMUSG00000031629"/>
      <node id="1928" label="ENSMUSG00000031668"/>
      <node id="1927" label="ENSMUSG00000031881"/>
      <node id="1926" label="ENSMUSG00000031903"/>
      <node id="1925" label="ENSMUSG00000031987"/>
      <node id="1924" label="ENSMUSG00000032202"/>
      <node id="1923" label="ENSMUSG00000032218"/>
      <node id="1922" label="ENSMUSG00000032226"/>
      <node id="1921" label="ENSMUSG00000032254"/>
      <node id="1920" label="ENSMUSG00000032322"/>
      <node id="1919" label="ENSMUSG00000032344"/>
      <node id="1918" label="ENSMUSG00000032350"/>
      <node id="1917" label="ENSMUSG00000032353"/>
      <node id="1916" label="ENSMUSG00000032373"/>
      <node id="1915" label="ENSMUSG00000032531"/>
      <node id="1914" label="ENSMUSG00000032555"/>
      <node id="1913" label="ENSMUSG00000032640"/>
      <node id="1912" label="ENSMUSG00000032656"/>
      <node id="1911" label="ENSMUSG00000032769"/>
      <node id="1910" label="ENSMUSG00000032776"/>
      <node id="1909" label="ENSMUSG00000032783"/>
      <node id="1908" label="ENSMUSG00000032902"/>
      <node id="1907" label="ENSMUSG00000032932"/>
      <node id="1906" label="ENSMUSG00000032965"/>
      <node id="1905" label="ENSMUSG00000033147"/>
      <node id="1904" label="ENSMUSG00000033287"/>
      <node id="1903" label="ENSMUSG00000033530"/>
      <node id="1902" label="ENSMUSG00000033906"/>
      <node id="1901" label="ENSMUSG00000033917"/>
      <node id="1900" label="ENSMUSG00000033952"/>
      <node id="1899" label="ENSMUSG00000034116"/>
      <node id="1898" label="ENSMUSG00000034164"/>
      <node id="1897" label="ENSMUSG00000034177"/>
      <node id="1896" label="ENSMUSG00000034226"/>
      <node id="1895" label="ENSMUSG00000034265"/>
      <node id="1894" label="ENSMUSG00000034317"/>
      <node id="1893" label="ENSMUSG00000034586"/>
      <node id="1892" label="ENSMUSG00000034758"/>
      <node id="1891" label="ENSMUSG00000034825"/>
      <node id="1890" label="ENSMUSG00000034858"/>
      <node id="1889" label="ENSMUSG00000034883"/>
      <node id="1888" label="ENSMUSG00000035273"/>
      <node id="1887" label="ENSMUSG00000035455"/>
      <node id="1886" label="ENSMUSG00000035486"/>
      <node id="1885" label="ENSMUSG00000035722"/>
      <node id="1884" label="ENSMUSG00000035847"/>
      <node id="1883" label="ENSMUSG00000035901"/>
      <node id="1882" label="ENSMUSG00000036022"/>
      <node id="1881" label="ENSMUSG00000036181"/>
      <node id="1880" label="ENSMUSG00000036256"/>
      <node id="1879" label="ENSMUSG00000036306"/>
      <node id="1878" label="ENSMUSG00000036368"/>
      <node id="1877" label="ENSMUSG00000036526"/>
      <node id="1876" label="ENSMUSG00000036863"/>
      <node id="1875" label="ENSMUSG00000036875"/>
      <node id="1874" label="ENSMUSG00000037005"/>
      <node id="1873" label="ENSMUSG00000037159"/>
      <node id="1872" label="ENSMUSG00000037235"/>
      <node id="1871" label="ENSMUSG00000037306"/>
      <node id="1870" label="ENSMUSG00000037428"/>
      <node id="1869" label="ENSMUSG00000037447"/>
      <node id="1868" label="ENSMUSG00000037579"/>
      <node id="1867" label="ENSMUSG00000037606"/>
      <node id="1866" label="ENSMUSG00000037628"/>
      <node id="1865" label="ENSMUSG00000037643"/>
      <node id="1864" label="ENSMUSG00000037820"/>
      <node id="1863" label="ENSMUSG00000037846"/>
      <node id="1862" label="ENSMUSG00000038005"/>
      <node id="1861" label="ENSMUSG00000038039"/>
      <node id="1860" label="ENSMUSG00000038068"/>
      <node id="1859" label="ENSMUSG00000038175"/>
      <node id="1858" label="ENSMUSG00000038241"/>
      <node id="1857" label="ENSMUSG00000038319"/>
      <node id="1856" label="ENSMUSG00000038354"/>
      <node id="1855" label="ENSMUSG00000038379"/>
      <node id="1854" label="ENSMUSG00000038497"/>
      <node id="1853" label="ENSMUSG00000038578"/>
      <node id="1852" label="ENSMUSG00000038644"/>
      <node id="1851" label="ENSMUSG00000038836"/>
      <node id="1850" label="ENSMUSG00000039050"/>
      <node id="1849" label="ENSMUSG00000039059"/>
      <node id="1848" label="ENSMUSG00000039115"/>
      <node id="1847" label="ENSMUSG00000039126"/>
      <node id="1846" label="ENSMUSG00000039145"/>
      <node id="1845" label="ENSMUSG00000039157"/>
      <node id="1844" label="ENSMUSG00000039158"/>
      <node id="1843" label="ENSMUSG00000039168"/>
      <node id="1842" label="ENSMUSG00000039234"/>
      <node id="1841" label="ENSMUSG00000039270"/>
      <node id="1840" label="ENSMUSG00000039384"/>
      <node id="1839" label="ENSMUSG00000039530"/>
      <node id="1838" label="ENSMUSG00000039621"/>
      <node id="1837" label="ENSMUSG00000039683"/>
      <node id="1836" label="ENSMUSG00000039774"/>
      <node id="1835" label="ENSMUSG00000039814"/>
      <node id="1834" label="ENSMUSG00000039982"/>
      <node id="1833" label="ENSMUSG00000040061"/>
      <node id="1832" label="ENSMUSG00000040084"/>
      <node id="1831" label="ENSMUSG00000040209"/>
      <node id="1830" label="ENSMUSG00000040276"/>
      <node id="1829" label="ENSMUSG00000040339"/>
      <node id="1828" label="ENSMUSG00000040462"/>
      <node id="1827" label="ENSMUSG00000040483"/>
      <node id="1826" label="ENSMUSG00000040495"/>
      <node id="1825" label="ENSMUSG00000040710"/>
      <node id="1824" label="ENSMUSG00000040723"/>
      <node id="1823" label="ENSMUSG00000040856"/>
      <node id="1822" label="ENSMUSG00000040860"/>
      <node id="1821" label="ENSMUSG00000040918"/>
      <node id="1820" label="ENSMUSG00000041064"/>
      <node id="1819" label="ENSMUSG00000041075"/>
      <node id="1818" label="ENSMUSG00000041117"/>
      <node id="1817" label="ENSMUSG00000041293"/>
      <node id="1816" label="ENSMUSG00000041498"/>
      <node id="1815" label="ENSMUSG00000042029"/>
      <node id="1814" label="ENSMUSG00000042213"/>
      <node id="1813" label="ENSMUSG00000042462"/>
      <node id="1812" label="ENSMUSG00000042489"/>
      <node id="1811" label="ENSMUSG00000042684"/>
      <node id="1810" label="ENSMUSG00000042985"/>
      <node id="1809" label="ENSMUSG00000043004"/>
      <node id="1808" label="ENSMUSG00000043088"/>
      <node id="1807" label="ENSMUSG00000043154"/>
      <node id="1806" label="ENSMUSG00000043439"/>
      <node id="1805" label="ENSMUSG00000044005"/>
      <node id="1804" label="ENSMUSG00000044066"/>
      <node id="1803" label="ENSMUSG00000044177"/>
      <node id="1802" label="ENSMUSG00000044201"/>
      <node id="1801" label="ENSMUSG00000044348"/>
      <node id="1800" label="ENSMUSG00000044548"/>
      <node id="1799" label="ENSMUSG00000044966"/>
      <node id="1798" label="ENSMUSG00000045165"/>
      <node id="1797" label="ENSMUSG00000045349"/>
      <node id="1796" label="ENSMUSG00000045932"/>
      <node id="1795" label="ENSMUSG00000046223"/>
      <node id="1794" label="ENSMUSG00000046447"/>
      <node id="1793" label="ENSMUSG00000046591"/>
      <node id="1792" label="ENSMUSG00000046668"/>
      <node id="1791" label="ENSMUSG00000047003"/>
      <node id="1790" label="ENSMUSG00000047044"/>
      <node id="1789" label="ENSMUSG00000047109"/>
      <node id="1788" label="ENSMUSG00000047115"/>
      <node id="1787" label="ENSMUSG00000047205"/>
      <node id="1786" label="ENSMUSG00000047221"/>
      <node id="1785" label="ENSMUSG00000047501"/>
      <node id="1784" label="ENSMUSG00000047507"/>
      <node id="1783" label="ENSMUSG00000047534"/>
      <node id="1782" label="ENSMUSG00000047642"/>
      <node id="1781" label="ENSMUSG00000047757"/>
      <node id="1780" label="ENSMUSG00000047842"/>
      <node id="1779" label="ENSMUSG00000047867"/>
      <node id="1778" label="ENSMUSG00000047986"/>
      <node id="1777" label="ENSMUSG00000048058"/>
      <node id="1776" label="ENSMUSG00000048148"/>
      <node id="1775" label="ENSMUSG00000048450"/>
      <node id="1774" label="ENSMUSG00000048473"/>
      <node id="1773" label="ENSMUSG00000048779"/>
      <node id="1772" label="ENSMUSG00000048965"/>
      <node id="1771" label="ENSMUSG00000049288"/>
      <node id="1770" label="ENSMUSG00000049350"/>
      <node id="1769" label="ENSMUSG00000049892"/>
      <node id="1768" label="ENSMUSG00000049907"/>
      <node id="1767" label="ENSMUSG00000050052"/>
      <node id="1766" label="ENSMUSG00000050132"/>
      <node id="1765" label="ENSMUSG00000050335"/>
      <node id="1764" label="ENSMUSG00000050357"/>
      <node id="1763" label="ENSMUSG00000051220"/>
      <node id="1762" label="ENSMUSG00000051278"/>
      <node id="1761" label="ENSMUSG00000051335"/>
      <node id="1760" label="ENSMUSG00000051457"/>
      <node id="1759" label="ENSMUSG00000052085"/>
      <node id="1758" label="ENSMUSG00000052087"/>
      <node id="1757" label="ENSMUSG00000052117"/>
      <node id="1756" label="ENSMUSG00000052135"/>
      <node id="1755" label="ENSMUSG00000052331"/>
      <node id="1754" label="ENSMUSG00000052384"/>
      <node id="1753" label="ENSMUSG00000053137"/>
      <node id="1752" label="ENSMUSG00000053334"/>
      <node id="1751" label="ENSMUSG00000053414"/>
      <node id="1750" label="ENSMUSG00000053460"/>
      <node id="1749" label="ENSMUSG00000053580"/>
      <node id="1748" label="ENSMUSG00000053581"/>
      <node id="1747" label="ENSMUSG00000054321"/>
      <node id="1746" label="ENSMUSG00000054342"/>
      <node id="1745" label="ENSMUSG00000054612"/>
      <node id="1744" label="ENSMUSG00000054717"/>
      <node id="1743" label="ENSMUSG00000054893"/>
      <node id="1742" label="ENSMUSG00000054920"/>
      <node id="1741" label="ENSMUSG00000055296"/>
      <node id="1740" label="ENSMUSG00000055612"/>
      <node id="1739" label="ENSMUSG00000055805"/>
      <node id="1738" label="ENSMUSG00000056069"/>
      <node id="1737" label="ENSMUSG00000056185"/>
      <node id="1736" label="ENSMUSG00000056602"/>
      <node id="1735" label="ENSMUSG00000056888"/>
      <node id="1734" label="ENSMUSG00000057069"/>
      <node id="1733" label="ENSMUSG00000057137"/>
      <node id="1732" label="ENSMUSG00000057335"/>
      <node id="1731" label="ENSMUSG00000058006"/>
      <node id="1730" label="ENSMUSG00000058135"/>
      <node id="1729" label="ENSMUSG00000058145"/>
      <node id="1728" label="ENSMUSG00000058290"/>
      <node id="1727" label="ENSMUSG00000058799"/>
      <node id="1726" label="ENSMUSG00000058975"/>
      <node id="1725" label="ENSMUSG00000059013"/>
      <node id="1724" label="ENSMUSG00000059336"/>
      <node id="1723" label="ENSMUSG00000059713"/>
      <node id="1722" label="ENSMUSG00000059939"/>
      <node id="1721" label="ENSMUSG00000060063"/>
      <node id="1720" label="ENSMUSG00000060550"/>
      <node id="1719" label="ENSMUSG00000061414"/>
      <node id="1718" label="ENSMUSG00000061607"/>
      <node id="1717" label="ENSMUSG00000061718"/>
      <node id="1716" label="ENSMUSG00000062070"/>
      <node id="1715" label="ENSMUSG00000062175"/>
      <node id="1714" label="ENSMUSG00000062248"/>
      <node id="1713" label="ENSMUSG00000062760"/>
      <node id="1712" label="ENSMUSG00000064215"/>
      <node id="1711" label="ENSMUSG00000064262"/>
      <node id="1710" label="ENSMUSG00000067813"/>
      <node id="1709" label="ENSMUSG00000069910"/>
      <node id="1708" label="ENSMUSG00000070284"/>
      <node id="1707" label="ENSMUSG00000070498"/>
      <node id="1706" label="ENSMUSG00000070576"/>
      <node id="1705" label="ENSMUSG00000070733"/>
      <node id="1704" label="ENSMUSG00000070802"/>
      <node id="1703" label="ENSMUSG00000071547"/>
      <node id="1702" label="ENSMUSG00000072115"/>
      <node id="1701" label="ENSMUSG00000072235"/>
      <node id="1700" label="ENSMUSG00000073409"/>
      <node id="1699" label="ENSMUSG00000074063"/>
      <node id="1698" label="ENSMUSG00000074217"/>
      <node id="1697" label="ENSMUSG00000074476"/>
      <node id="1696" label="ENSMUSG00000074604"/>
      <node id="1695" label="ENSMUSG00000074715"/>
      <node id="1694" label="ENSMUSG00000074785"/>
      <node id="1693" label="ENSMUSG00000074802"/>
      <node id="1692" label="ENSMUSG00000074892"/>
      <node id="1691" label="ENSMUSG00000075502"/>
      <node id="1690" label="ENSMUSG00000075543"/>
      <node id="1689" label="ENSMUSG00000078202"/>
      <node id="1688" label="ENSMUSG00000078612"/>
      <node id="1687" label="ENSMUSG00000078650"/>
      <node id="1686" label="ENSMUSG00000078773"/>
      <node id="1685" label="ENSMUSG00000079037"/>
      <node id="1684" label="ENSMUSG00000079339"/>
      <node id="1683" label="ENSMUSG00000079553"/>
      <node id="1682" label="ENSMUSG00000087651"/>
      <node id="1681" label="ENSMUSG00000094928"/>
      <node id="1680" label="ENSMUSG00000096847"/>
      <node id="1679" label="ENSMUSG00000108348"/>
      <node id="1678" label="ENSMUSG00000110105"/>
      <node id="1677" label="ENSMUSG00000110206"/>
      <node id="1676" label="ENSMUSG00000000942"/>
      <node id="1675" label="ENSMUSG00000000214"/>
      <node id="1674" label="ENSMUSG00000001517"/>
      <node id="1673" label="ENSMUSG00000019846"/>
      <node id="1672" label="ENSMUSG00000001819"/>
      <node id="1671" label="ENSMUSG00000021835"/>
      <node id="1670" label="ENSMUSG00000038793"/>
      <node id="1669" label="ENSMUSG00000000126"/>
      <node id="1668" label="ENSMUSG00000000394"/>
      <node id="1667" label="ENSMUSG00000000560"/>
      <node id="1666" label="ENSMUSG00000004113"/>
      <node id="1665" label="ENSMUSG00000004366"/>
      <node id="1664" label="ENSMUSG00000005360"/>
      <node id="1663" label="ENSMUSG00000006435"/>
      <node id="1662" label="ENSMUSG00000010505"/>
      <node id="1661" label="ENSMUSG00000010830"/>
      <node id="1660" label="ENSMUSG00000014164"/>
      <node id="1659" label="ENSMUSG00000014351"/>
      <node id="1658" label="ENSMUSG00000017652"/>
      <node id="1657" label="ENSMUSG00000019761"/>
      <node id="1656" label="ENSMUSG00000020121"/>
      <node id="1655" label="ENSMUSG00000020303"/>
      <node id="1654" label="ENSMUSG00000020808"/>
      <node id="1653" label="ENSMUSG00000021337"/>
      <node id="1652" label="ENSMUSG00000021846"/>
      <node id="1651" label="ENSMUSG00000021999"/>
      <node id="1650" label="ENSMUSG00000022054"/>
      <node id="1649" label="ENSMUSG00000022769"/>
      <node id="1648" label="ENSMUSG00000022962"/>
      <node id="1647" label="ENSMUSG00000023913"/>
      <node id="1646" label="ENSMUSG00000024033"/>
      <node id="1645" label="ENSMUSG00000024552"/>
      <node id="1644" label="ENSMUSG00000025064"/>
      <node id="1643" label="ENSMUSG00000025091"/>
      <node id="1642" label="ENSMUSG00000025551"/>
      <node id="1641" label="ENSMUSG00000026335"/>
      <node id="1640" label="ENSMUSG00000026443"/>
      <node id="1639" label="ENSMUSG00000026764"/>
      <node id="1638" label="ENSMUSG00000026961"/>
      <node id="1637" label="ENSMUSG00000027254"/>
      <node id="1636" label="ENSMUSG00000027273"/>
      <node id="1635" label="ENSMUSG00000027544"/>
      <node id="1634" label="ENSMUSG00000028186"/>
      <node id="1633" label="ENSMUSG00000028843"/>
      <node id="1632" label="ENSMUSG00000030074"/>
      <node id="1631" label="ENSMUSG00000030406"/>
      <node id="1630" label="ENSMUSG00000031757"/>
      <node id="1629" label="ENSMUSG00000031760"/>
      <node id="1628" label="ENSMUSG00000031788"/>
      <node id="1627" label="ENSMUSG00000031791"/>
      <node id="1626" label="ENSMUSG00000032076"/>
      <node id="1625" label="ENSMUSG00000032297"/>
      <node id="1624" label="ENSMUSG00000032548"/>
      <node id="1623" label="ENSMUSG00000033061"/>
      <node id="1622" label="ENSMUSG00000033307"/>
      <node id="1621" label="ENSMUSG00000033740"/>
      <node id="1620" label="ENSMUSG00000033900"/>
      <node id="1619" label="ENSMUSG00000034275"/>
      <node id="1618" label="ENSMUSG00000034579"/>
      <node id="1617" label="ENSMUSG00000034773"/>
      <node id="1616" label="ENSMUSG00000034774"/>
      <node id="1615" label="ENSMUSG00000035226"/>
      <node id="1614" label="ENSMUSG00000035279"/>
      <node id="1613" label="ENSMUSG00000035357"/>
      <node id="1612" label="ENSMUSG00000035509"/>
      <node id="1611" label="ENSMUSG00000035606"/>
      <node id="1610" label="ENSMUSG00000036913"/>
      <node id="1609" label="ENSMUSG00000037580"/>
      <node id="1608" label="ENSMUSG00000037664"/>
      <node id="1607" label="ENSMUSG00000038255"/>
      <node id="1606" label="ENSMUSG00000038451"/>
      <node id="1605" label="ENSMUSG00000038456"/>
      <node id="1604" label="ENSMUSG00000038879"/>
      <node id="1603" label="ENSMUSG00000039372"/>
      <node id="1602" label="ENSMUSG00000039934"/>
      <node id="1601" label="ENSMUSG00000040852"/>
      <node id="1600" label="ENSMUSG00000041633"/>
      <node id="1599" label="ENSMUSG00000042429"/>
      <node id="1598" label="ENSMUSG00000042734"/>
      <node id="1597" label="ENSMUSG00000043068"/>
      <node id="1596" label="ENSMUSG00000043639"/>
      <node id="1595" label="ENSMUSG00000045838"/>
      <node id="1594" label="ENSMUSG00000046242"/>
      <node id="1593" label="ENSMUSG00000046546"/>
      <node id="1592" label="ENSMUSG00000047298"/>
      <node id="1591" label="ENSMUSG00000047907"/>
      <node id="1590" label="ENSMUSG00000048970"/>
      <node id="1589" label="ENSMUSG00000049148"/>
      <node id="1588" label="ENSMUSG00000051111"/>
      <node id="1587" label="ENSMUSG00000051166"/>
      <node id="1586" label="ENSMUSG00000051177"/>
      <node id="1585" label="ENSMUSG00000053216"/>
      <node id="1584" label="ENSMUSG00000053963"/>
      <node id="1583" label="ENSMUSG00000056222"/>
      <node id="1582" label="ENSMUSG00000056531"/>
      <node id="1581" label="ENSMUSG00000058297"/>
      <node id="1580" label="ENSMUSG00000058624"/>
      <node id="1579" label="ENSMUSG00000059742"/>
      <node id="1578" label="ENSMUSG00000059991"/>
      <node id="1577" label="ENSMUSG00000062859"/>
      <node id="1576" label="ENSMUSG00000064090"/>
      <node id="1575" label="ENSMUSG00000066952"/>
      <node id="1574" label="ENSMUSG00000067925"/>
      <node id="1573" label="ENSMUSG00000070287"/>
      <node id="1572" label="ENSMUSG00000070532"/>
      <node id="1571" label="ENSMUSG00000094651"/>
      <node id="1570" label="ENSMUSG00000004099"/>
      <node id="1569" label="ENSMUSG00000015401"/>
      <node id="1568" label="ENSMUSG00000021123"/>
      <node id="1567" label="ENSMUSG00000025938"/>
      <node id="1566" label="ENSMUSG00000025969"/>
      <node id="1565" label="ENSMUSG00000026833"/>
      <node id="1564" label="ENSMUSG00000041548"/>
      <node id="1563" label="ENSMUSG00000041836"/>
      <node id="1562" label="ENSMUSG00000042115"/>
      <node id="1561" label="ENSMUSG00000042873"/>
      <node id="1560" label="ENSMUSG00000006362"/>
      <node id="1559" label="ENSMUSG00000023216"/>
      <node id="1558" label="ENSMUSG00000008193"/>
      <node id="1557" label="ENSMUSG00000020472"/>
      <node id="1556" label="ENSMUSG00000020894"/>
      <node id="1555" label="ENSMUSG00000021194"/>
      <node id="1554" label="ENSMUSG00000025498"/>
      <node id="1553" label="ENSMUSG00000028927"/>
      <node id="1552" label="ENSMUSG00000032978"/>
      <node id="1551" label="ENSMUSG00000037568"/>
      <node id="1550" label="ENSMUSG00000040136"/>
      <node id="1549" label="ENSMUSG00000042404"/>
      <node id="1548" label="ENSMUSG00000042686"/>
      <node id="1547" label="ENSMUSG00000046460"/>
      <node id="1546" label="ENSMUSG00000046805"/>
      <node id="1545" label="ENSMUSG00000047415"/>
      <node id="1544" label="ENSMUSG00000048534"/>
      <node id="1543" label="ENSMUSG00000051498"/>
      <node id="1542" label="ENSMUSG00000054871"/>
      <node id="1541" label="ENSMUSG00000066152"/>
      <node id="1540" label="ENSMUSG00000069227"/>
      <node id="1539" label="ENSMUSG00000069814"/>
      <node id="1538" label="ENSMUSG00000074183"/>
      <node id="1537" label="ENSMUSG00000008398"/>
      <node id="1536" label="ENSMUSG00000009248"/>
      <node id="1535" label="ENSMUSG00000001025"/>
      <node id="1534" label="ENSMUSG00000003283"/>
      <node id="1533" label="ENSMUSG00000003436"/>
      <node id="1532" label="ENSMUSG00000004951"/>
      <node id="1531" label="ENSMUSG00000006575"/>
      <node id="1530" label="ENSMUSG00000006930"/>
      <node id="1529" label="ENSMUSG00000007989"/>
      <node id="1528" label="ENSMUSG00000013846"/>
      <node id="1527" label="ENSMUSG00000018169"/>
      <node id="1526" label="ENSMUSG00000019188"/>
      <node id="1525" label="ENSMUSG00000019214"/>
      <node id="1524" label="ENSMUSG00000020131"/>
      <node id="1523" label="ENSMUSG00000020135"/>
      <node id="1522" label="ENSMUSG00000020182"/>
      <node id="1521" label="ENSMUSG00000020226"/>
      <node id="1520" label="ENSMUSG00000020424"/>
      <node id="1519" label="ENSMUSG00000020641"/>
      <node id="1518" label="ENSMUSG00000021559"/>
      <node id="1517" label="ENSMUSG00000022021"/>
      <node id="1516" label="ENSMUSG00000022686"/>
      <node id="1515" label="ENSMUSG00000022840"/>
      <node id="1514" label="ENSMUSG00000022881"/>
      <node id="1513" label="ENSMUSG00000023393"/>
      <node id="1512" label="ENSMUSG00000024013"/>
      <node id="1511" label="ENSMUSG00000024030"/>
      <node id="1510" label="ENSMUSG00000024423"/>
      <node id="1509" label="ENSMUSG00000024807"/>
      <node id="1508" label="ENSMUSG00000024827"/>
      <node id="1507" label="ENSMUSG00000024935"/>
      <node id="1506" label="ENSMUSG00000025151"/>
      <node id="1505" label="ENSMUSG00000025422"/>
      <node id="1504" label="ENSMUSG00000025742"/>
      <node id="1503" label="ENSMUSG00000025747"/>
      <node id="1502" label="ENSMUSG00000026355"/>
      <node id="1501" label="ENSMUSG00000026380"/>
      <node id="1500" label="ENSMUSG00000026430"/>
      <node id="1499" label="ENSMUSG00000026480"/>
      <node id="1498" label="ENSMUSG00000026669"/>
      <node id="1497" label="ENSMUSG00000026864"/>
      <node id="1496" label="ENSMUSG00000026930"/>
      <node id="1495" label="ENSMUSG00000027018"/>
      <node id="1494" label="ENSMUSG00000027346"/>
      <node id="1493" label="ENSMUSG00000027420"/>
      <node id="1492" label="ENSMUSG00000027435"/>
      <node id="1491" label="ENSMUSG00000027456"/>
      <node id="1490" label="ENSMUSG00000027499"/>
      <node id="1489" label="ENSMUSG00000027661"/>
      <node id="1488" label="ENSMUSG00000028573"/>
      <node id="1487" label="ENSMUSG00000028763"/>
      <node id="1486" label="ENSMUSG00000028825"/>
      <node id="1485" label="ENSMUSG00000028926"/>
      <node id="1484" label="ENSMUSG00000028949"/>
      <node id="1483" label="ENSMUSG00000029102"/>
      <node id="1482" label="ENSMUSG00000029177"/>
      <node id="1481" label="ENSMUSG00000029490"/>
      <node id="1480" label="ENSMUSG00000030411"/>
      <node id="1479" label="ENSMUSG00000030659"/>
      <node id="1478" label="ENSMUSG00000030677"/>
      <node id="1477" label="ENSMUSG00000030866"/>
      <node id="1476" label="ENSMUSG00000031155"/>
      <node id="1475" label="ENSMUSG00000031448"/>
      <node id="1474" label="ENSMUSG00000031730"/>
      <node id="1473" label="ENSMUSG00000031957"/>
      <node id="1472" label="ENSMUSG00000032120"/>
      <node id="1471" label="ENSMUSG00000032251"/>
      <node id="1470" label="ENSMUSG00000032400"/>
      <node id="1469" label="ENSMUSG00000032470"/>
      <node id="1468" label="ENSMUSG00000032489"/>
      <node id="1467" label="ENSMUSG00000032733"/>
      <node id="1466" label="ENSMUSG00000033752"/>
      <node id="1465" label="ENSMUSG00000033970"/>
      <node id="1464" label="ENSMUSG00000034353"/>
      <node id="1463" label="ENSMUSG00000034768"/>
      <node id="1462" label="ENSMUSG00000034906"/>
      <node id="1461" label="ENSMUSG00000035095"/>
      <node id="1460" label="ENSMUSG00000035506"/>
      <node id="1459" label="ENSMUSG00000035692"/>
      <node id="1458" label="ENSMUSG00000035849"/>
      <node id="1457" label="ENSMUSG00000035863"/>
      <node id="1456" label="ENSMUSG00000035967"/>
      <node id="1455" label="ENSMUSG00000036223"/>
      <node id="1454" label="ENSMUSG00000036892"/>
      <node id="1453" label="ENSMUSG00000038390"/>
      <node id="1452" label="ENSMUSG00000038648"/>
      <node id="1451" label="ENSMUSG00000039304"/>
      <node id="1450" label="ENSMUSG00000039323"/>
      <node id="1449" label="ENSMUSG00000039395"/>
      <node id="1448" label="ENSMUSG00000039943"/>
      <node id="1447" label="ENSMUSG00000040035"/>
      <node id="1446" label="ENSMUSG00000040563"/>
      <node id="1445" label="ENSMUSG00000040990"/>
      <node id="1444" label="ENSMUSG00000041390"/>
      <node id="1443" label="ENSMUSG00000044072"/>
      <node id="1442" label="ENSMUSG00000044337"/>
      <node id="1441" label="ENSMUSG00000044340"/>
      <node id="1440" label="ENSMUSG00000044734"/>
      <node id="1439" label="ENSMUSG00000044933"/>
      <node id="1438" label="ENSMUSG00000045007"/>
      <node id="1437" label="ENSMUSG00000045667"/>
      <node id="1436" label="ENSMUSG00000045751"/>
      <node id="1435" label="ENSMUSG00000047230"/>
      <node id="1434" label="ENSMUSG00000047878"/>
      <node id="1433" label="ENSMUSG00000049608"/>
      <node id="1432" label="ENSMUSG00000049807"/>
      <node id="1431" label="ENSMUSG00000049858"/>
      <node id="1430" label="ENSMUSG00000050395"/>
      <node id="1429" label="ENSMUSG00000051079"/>
      <node id="1428" label="ENSMUSG00000051344"/>
      <node id="1427" label="ENSMUSG00000051359"/>
      <node id="1426" label="ENSMUSG00000053846"/>
      <node id="1425" label="ENSMUSG00000054640"/>
      <node id="1424" label="ENSMUSG00000055407"/>
      <node id="1423" label="ENSMUSG00000059060"/>
      <node id="1422" label="ENSMUSG00000059412"/>
      <node id="1421" label="ENSMUSG00000060671"/>
      <node id="1420" label="ENSMUSG00000061455"/>
      <node id="1419" label="ENSMUSG00000064267"/>
      <node id="1418" label="ENSMUSG00000066705"/>
      <node id="1417" label="ENSMUSG00000068101"/>
      <node id="1416" label="ENSMUSG00000068735"/>
      <node id="1415" label="ENSMUSG00000069114"/>
      <node id="1414" label="ENSMUSG00000070337"/>
      <node id="1413" label="ENSMUSG00000070407"/>
      <node id="1412" label="ENSMUSG00000071719"/>
      <node id="1411" label="ENSMUSG00000072082"/>
      <node id="1410" label="ENSMUSG00000072620"/>
      <node id="1409" label="ENSMUSG00000075702"/>
      <node id="1408" label="ENSMUSG00000078349"/>
      <node id="1407" label="ENSMUSG00000078949"/>
      <node id="1406" label="ENSMUSG00000079038"/>
      <node id="1405" label="ENSMUSG00000079471"/>
      <node id="1404" label="ENSMUSG00000079685"/>
      <node id="1403" label="ENSMUSG00000089789"/>
      <node id="1402" label="ENSMUSG00000090626"/>
      <node id="1401" label="ENSMUSG00000092486"/>
      <node id="1400" label="ENSMUSG00000096054"/>
      <node id="1399" label="ENSMUSG00000098557"/>
      <node id="1398" label="ENSMUSG00000038530"/>
      <node id="1397" label="ENSMUSG00000059588"/>
      <node id="1396" label="ENSMUSG00000012350"/>
      <node id="1395" label="ENSMUSG00000001985"/>
      <node id="1394" label="ENSMUSG00000006586"/>
      <node id="1393" label="ENSMUSG00000010021"/>
      <node id="1392" label="ENSMUSG00000019232"/>
      <node id="1391" label="ENSMUSG00000020427"/>
      <node id="1390" label="ENSMUSG00000021061"/>
      <node id="1389" label="ENSMUSG00000021685"/>
      <node id="1388" label="ENSMUSG00000022422"/>
      <node id="1387" label="ENSMUSG00000022489"/>
      <node id="1386" label="ENSMUSG00000023092"/>
      <node id="1385" label="ENSMUSG00000024366"/>
      <node id="1384" label="ENSMUSG00000024533"/>
      <node id="1383" label="ENSMUSG00000024743"/>
      <node id="1382" label="ENSMUSG00000026527"/>
      <node id="1381" label="ENSMUSG00000026959"/>
      <node id="1380" label="ENSMUSG00000027524"/>
      <node id="1379" label="ENSMUSG00000028986"/>
      <node id="1378" label="ENSMUSG00000031586"/>
      <node id="1377" label="ENSMUSG00000031756"/>
      <node id="1376" label="ENSMUSG00000032285"/>
      <node id="1375" label="ENSMUSG00000032356"/>
      <node id="1374" label="ENSMUSG00000032773"/>
      <node id="1373" label="ENSMUSG00000033278"/>
      <node id="1372" label="ENSMUSG00000042258"/>
      <node id="1371" label="ENSMUSG00000044288"/>
      <node id="1370" label="ENSMUSG00000045312"/>
      <node id="1369" label="ENSMUSG00000045518"/>
      <node id="1368" label="ENSMUSG00000048349"/>
      <node id="1367" label="ENSMUSG00000052353"/>
      <node id="1366" label="ENSMUSG00000055485"/>
      <node id="1365" label="ENSMUSG00000057716"/>
      <node id="1364" label="ENSMUSG00000061171"/>
      <node id="1363" label="ENSMUSG00000062078"/>
      <node id="1362" label="ENSMUSG00000063568"/>
      <node id="1361" label="ENSMUSG00000068196"/>
      <node id="1360" label="ENSMUSG00000069255"/>
      <node id="1359" label="ENSMUSG00000070867"/>
      <node id="1358" label="ENSMUSG00000074652"/>
      <node id="1357" label="ENSMUSG00000092083"/>
      <node id="1356" label="ENSMUSG00000015468"/>
      <node id="1355" label="ENSMUSG00000056758"/>
      <node id="1354" label="ENSMUSG00000017724"/>
      <node id="1353" label="ENSMUSG00000018623"/>
      <node id="1352" label="ENSMUSG00000000555"/>
      <node id="1351" label="ENSMUSG00000001281"/>
      <node id="1350" label="ENSMUSG00000001761"/>
      <node id="1349" label="ENSMUSG00000002668"/>
      <node id="1348" label="ENSMUSG00000003228"/>
      <node id="1347" label="ENSMUSG00000003469"/>
      <node id="1346" label="ENSMUSG00000003541"/>
      <node id="1345" label="ENSMUSG00000004709"/>
      <node id="1344" label="ENSMUSG00000004952"/>
      <node id="1343" label="ENSMUSG00000005873"/>
      <node id="1342" label="ENSMUSG00000006546"/>
      <node id="1341" label="ENSMUSG00000009092"/>
      <node id="1340" label="ENSMUSG00000009108"/>
      <node id="1339" label="ENSMUSG00000009246"/>
      <node id="1338" label="ENSMUSG00000012017"/>
      <node id="1337" label="ENSMUSG00000013523"/>
      <node id="1336" label="ENSMUSG00000013698"/>
      <node id="1335" label="ENSMUSG00000015396"/>
      <node id="1334" label="ENSMUSG00000015962"/>
      <node id="1333" label="ENSMUSG00000016200"/>
      <node id="1332" label="ENSMUSG00000017009"/>
      <node id="1331" label="ENSMUSG00000017057"/>
      <node id="1330" label="ENSMUSG00000017144"/>
      <node id="1329" label="ENSMUSG00000017868"/>
      <node id="1328" label="ENSMUSG00000020218"/>
      <node id="1327" label="ENSMUSG00000020581"/>
      <node id="1326" label="ENSMUSG00000020620"/>
      <node id="1325" label="ENSMUSG00000021256"/>
      <node id="1324" label="ENSMUSG00000021281"/>
      <node id="1323" label="ENSMUSG00000021396"/>
      <node id="1322" label="ENSMUSG00000021587"/>
      <node id="1321" label="ENSMUSG00000021720"/>
      <node id="1320" label="ENSMUSG00000022208"/>
      <node id="1319" label="ENSMUSG00000023050"/>
      <node id="1318" label="ENSMUSG00000023473"/>
      <node id="1317" label="ENSMUSG00000023827"/>
      <node id="1316" label="ENSMUSG00000023908"/>
      <node id="1315" label="ENSMUSG00000024613"/>
      <node id="1314" label="ENSMUSG00000024621"/>
      <node id="1313" label="ENSMUSG00000024646"/>
      <node id="1312" label="ENSMUSG00000024810"/>
      <node id="1311" label="ENSMUSG00000024901"/>
      <node id="1310" label="ENSMUSG00000025059"/>
      <node id="1309" label="ENSMUSG00000025492"/>
      <node id="1308" label="ENSMUSG00000025507"/>
      <node id="1307" label="ENSMUSG00000025810"/>
      <node id="1306" label="ENSMUSG00000026068"/>
      <node id="1305" label="ENSMUSG00000026072"/>
      <node id="1304" label="ENSMUSG00000026102"/>
      <node id="1303" label="ENSMUSG00000026646"/>
      <node id="1302" label="ENSMUSG00000026657"/>
      <node id="1301" label="ENSMUSG00000026700"/>
      <node id="1300" label="ENSMUSG00000026815"/>
      <node id="1299" label="ENSMUSG00000026955"/>
      <node id="1298" label="ENSMUSG00000027375"/>
      <node id="1297" label="ENSMUSG00000027750"/>
      <node id="1296" label="ENSMUSG00000027890"/>
      <node id="1295" label="ENSMUSG00000027931"/>
      <node id="1294" label="ENSMUSG00000027938"/>
      <node id="1293" label="ENSMUSG00000028057"/>
      <node id="1292" label="ENSMUSG00000028076"/>
      <node id="1291" label="ENSMUSG00000028403"/>
      <node id="1290" label="ENSMUSG00000028551"/>
      <node id="1289" label="ENSMUSG00000028749"/>
      <node id="1288" label="ENSMUSG00000028972"/>
      <node id="1287" label="ENSMUSG00000029154"/>
      <node id="1286" label="ENSMUSG00000029370"/>
      <node id="1285" label="ENSMUSG00000029561"/>
      <node id="1284" label="ENSMUSG00000029706"/>
      <node id="1283" label="ENSMUSG00000029919"/>
      <node id="1282" label="ENSMUSG00000030263"/>
      <node id="1281" label="ENSMUSG00000030329"/>
      <node id="1280" label="ENSMUSG00000030359"/>
      <node id="1279" label="ENSMUSG00000030717"/>
      <node id="1278" label="ENSMUSG00000031173"/>
      <node id="1277" label="ENSMUSG00000031403"/>
      <node id="1276" label="ENSMUSG00000031451"/>
      <node id="1275" label="ENSMUSG00000032549"/>
      <node id="1274" label="ENSMUSG00000032661"/>
      <node id="1273" label="ENSMUSG00000032839"/>
      <node id="1272" label="ENSMUSG00000033684"/>
      <node id="1271" label="ENSMUSG00000034349"/>
      <node id="1270" label="ENSMUSG00000034855"/>
      <node id="1269" label="ENSMUSG00000035164"/>
      <node id="1268" label="ENSMUSG00000035561"/>
      <node id="1267" label="ENSMUSG00000036036"/>
      <node id="1266" label="ENSMUSG00000036745"/>
      <node id="1265" label="ENSMUSG00000036777"/>
      <node id="1264" label="ENSMUSG00000036887"/>
      <node id="1263" label="ENSMUSG00000037032"/>
      <node id="1262" label="ENSMUSG00000037419"/>
      <node id="1261" label="ENSMUSG00000037868"/>
      <node id="1260" label="ENSMUSG00000037991"/>
      <node id="1259" label="ENSMUSG00000038180"/>
      <node id="1258" label="ENSMUSG00000038463"/>
      <node id="1257" label="ENSMUSG00000038486"/>
      <node id="1256" label="ENSMUSG00000038580"/>
      <node id="1255" label="ENSMUSG00000038599"/>
      <node id="1254" label="ENSMUSG00000038745"/>
      <node id="1253" label="ENSMUSG00000038777"/>
      <node id="1252" label="ENSMUSG00000039676"/>
      <node id="1251" label="ENSMUSG00000040380"/>
      <node id="1250" label="ENSMUSG00000040528"/>
      <node id="1249" label="ENSMUSG00000040624"/>
      <node id="1248" label="ENSMUSG00000040717"/>
      <node id="1247" label="ENSMUSG00000041202"/>
      <node id="1246" label="ENSMUSG00000041439"/>
      <node id="1245" label="ENSMUSG00000041859"/>
      <node id="1244" label="ENSMUSG00000042109"/>
      <node id="1243" label="ENSMUSG00000042564"/>
      <node id="1242" label="ENSMUSG00000043391"/>
      <node id="1241" label="ENSMUSG00000043432"/>
      <node id="1240" label="ENSMUSG00000043885"/>
      <node id="1239" label="ENSMUSG00000043953"/>
      <node id="1238" label="ENSMUSG00000044317"/>
      <node id="1237" label="ENSMUSG00000044456"/>
      <node id="1236" label="ENSMUSG00000045094"/>
      <node id="1235" label="ENSMUSG00000045328"/>
      <node id="1234" label="ENSMUSG00000045817"/>
      <node id="1233" label="ENSMUSG00000045827"/>
      <node id="1232" label="ENSMUSG00000046410"/>
      <node id="1231" label="ENSMUSG00000046711"/>
      <node id="1230" label="ENSMUSG00000047139"/>
      <node id="1229" label="ENSMUSG00000047181"/>
      <node id="1228" label="ENSMUSG00000048022"/>
      <node id="1227" label="ENSMUSG00000048216"/>
      <node id="1226" label="ENSMUSG00000048329"/>
      <node id="1225" label="ENSMUSG00000048373"/>
      <node id="1224" label="ENSMUSG00000048612"/>
      <node id="1223" label="ENSMUSG00000048752"/>
      <node id="1222" label="ENSMUSG00000049281"/>
      <node id="1221" label="ENSMUSG00000049313"/>
      <node id="1220" label="ENSMUSG00000049436"/>
      <node id="1219" label="ENSMUSG00000049588"/>
      <node id="1218" label="ENSMUSG00000049723"/>
      <node id="1217" label="ENSMUSG00000050064"/>
      <node id="1216" label="ENSMUSG00000050097"/>
      <node id="1215" label="ENSMUSG00000052631"/>
      <node id="1214" label="ENSMUSG00000053182"/>
      <node id="1213" label="ENSMUSG00000053617"/>
      <node id="1212" label="ENSMUSG00000054200"/>
      <node id="1211" label="ENSMUSG00000055976"/>
      <node id="1210" label="ENSMUSG00000056592"/>
      <node id="1209" label="ENSMUSG00000058216"/>
      <node id="1208" label="ENSMUSG00000058672"/>
      <node id="1207" label="ENSMUSG00000060429"/>
      <node id="1206" label="ENSMUSG00000060519"/>
      <node id="1205" label="ENSMUSG00000060548"/>
      <node id="1204" label="ENSMUSG00000062593"/>
      <node id="1203" label="ENSMUSG00000064140"/>
      <node id="1202" label="ENSMUSG00000065952"/>
      <node id="1201" label="ENSMUSG00000066324"/>
      <node id="1200" label="ENSMUSG00000067297"/>
      <node id="1199" label="ENSMUSG00000068877"/>
      <node id="1198" label="ENSMUSG00000069184"/>
      <node id="1197" label="ENSMUSG00000069515"/>
      <node id="1196" label="ENSMUSG00000069793"/>
      <node id="1195" label="ENSMUSG00000069805"/>
      <node id="1194" label="ENSMUSG00000071103"/>
      <node id="1193" label="ENSMUSG00000071203"/>
      <node id="1192" label="ENSMUSG00000071537"/>
      <node id="1191" label="ENSMUSG00000073207"/>
      <node id="1190" label="ENSMUSG00000074345"/>
      <node id="1189" label="ENSMUSG00000074896"/>
      <node id="1188" label="ENSMUSG00000078984"/>
      <node id="1187" label="ENSMUSG00000079442"/>
      <node id="1186" label="ENSMUSG00000079654"/>
      <node id="1185" label="ENSMUSG00000090353"/>
      <node id="1184" label="ENSMUSG00000101605"/>
      <node id="1183" label="ENSMUSG00000019900"/>
      <node id="1182" label="ENSMUSG00000010825"/>
      <node id="1181" label="ENSMUSG00000019124"/>
      <node id="1180" label="ENSMUSG00000021198"/>
      <node id="1179" label="ENSMUSG00000021303"/>
      <node id="1178" label="ENSMUSG00000022018"/>
      <node id="1177" label="ENSMUSG00000024175"/>
      <node id="1176" label="ENSMUSG00000024897"/>
      <node id="1175" label="ENSMUSG00000025876"/>
      <node id="1174" label="ENSMUSG00000029420"/>
      <node id="1173" label="ENSMUSG00000030897"/>
      <node id="1172" label="ENSMUSG00000031790"/>
      <node id="1171" label="ENSMUSG00000031853"/>
      <node id="1170" label="ENSMUSG00000032338"/>
      <node id="1169" label="ENSMUSG00000032507"/>
      <node id="1168" label="ENSMUSG00000036764"/>
      <node id="1167" label="ENSMUSG00000036915"/>
      <node id="1166" label="ENSMUSG00000037953"/>
      <node id="1165" label="ENSMUSG00000040543"/>
      <node id="1164" label="ENSMUSG00000041141"/>
      <node id="1163" label="ENSMUSG00000041798"/>
      <node id="1162" label="ENSMUSG00000044988"/>
      <node id="1161" label="ENSMUSG00000047250"/>
      <node id="1160" label="ENSMUSG00000049154"/>
      <node id="1159" label="ENSMUSG00000055197"/>
      <node id="1158" label="ENSMUSG00000058070"/>
      <node id="1157" label="ENSMUSG00000064272"/>
      <node id="1156" label="ENSMUSG00000066720"/>
      <node id="1155" label="ENSMUSG00000094626"/>
      <node id="1154" label="ENSMUSG00000000125"/>
      <node id="1153" label="ENSMUSG00000002055"/>
      <node id="1152" label="ENSMUSG00000005672"/>
      <node id="1151" label="ENSMUSG00000009545"/>
      <node id="1150" label="ENSMUSG00000022857"/>
      <node id="1149" label="ENSMUSG00000024151"/>
      <node id="1148" label="ENSMUSG00000026272"/>
      <node id="1147" label="ENSMUSG00000028527"/>
      <node id="1146" label="ENSMUSG00000028693"/>
      <node id="1145" label="ENSMUSG00000031532"/>
      <node id="1144" label="ENSMUSG00000033029"/>
      <node id="1143" label="ENSMUSG00000034818"/>
      <node id="1142" label="ENSMUSG00000038146"/>
      <node id="1141" label="ENSMUSG00000039013"/>
      <node id="1140" label="ENSMUSG00000040046"/>
      <node id="1139" label="ENSMUSG00000040231"/>
      <node id="1138" label="ENSMUSG00000041168"/>
      <node id="1137" label="ENSMUSG00000042155"/>
      <node id="1136" label="ENSMUSG00000042532"/>
      <node id="1135" label="ENSMUSG00000054582"/>
      <node id="1134" label="ENSMUSG00000063810"/>
      <node id="1133" label="ENSMUSG00000093805"/>
      <node id="1132" label="ENSMUSG00000020423"/>
      <node id="1131" label="ENSMUSG00000073043"/>
      <node id="1130" label="ENSMUSG00000021379"/>
      <node id="1129" label="ENSMUSG00000035451"/>
      <node id="1128" label="ENSMUSG00000000120"/>
      <node id="1127" label="ENSMUSG00000000202"/>
      <node id="1126" label="ENSMUSG00000000253"/>
      <node id="1125" label="ENSMUSG00000000296"/>
      <node id="1124" label="ENSMUSG00000000416"/>
      <node id="1123" label="ENSMUSG00000000530"/>
      <node id="1122" label="ENSMUSG00000000884"/>
      <node id="1121" label="ENSMUSG00000001228"/>
      <node id="1120" label="ENSMUSG00000001333"/>
      <node id="1119" label="ENSMUSG00000001435"/>
      <node id="1118" label="ENSMUSG00000001525"/>
      <node id="1117" label="ENSMUSG00000001802"/>
      <node id="1116" label="ENSMUSG00000001901"/>
      <node id="1115" label="ENSMUSG00000002006"/>
      <node id="1114" label="ENSMUSG00000002107"/>
      <node id="1113" label="ENSMUSG00000002233"/>
      <node id="1112" label="ENSMUSG00000002341"/>
      <node id="1111" label="ENSMUSG00000002504"/>
      <node id="1110" label="ENSMUSG00000003355"/>
      <node id="1109" label="ENSMUSG00000003411"/>
      <node id="1108" label="ENSMUSG00000003418"/>
      <node id="1107" label="ENSMUSG00000004038"/>
      <node id="1106" label="ENSMUSG00000004347"/>
      <node id="1105" label="ENSMUSG00000004654"/>
      <node id="1104" label="ENSMUSG00000005470"/>
      <node id="1103" label="ENSMUSG00000006342"/>
      <node id="1102" label="ENSMUSG00000006386"/>
      <node id="1101" label="ENSMUSG00000006651"/>
      <node id="1100" label="ENSMUSG00000006675"/>
      <node id="1099" label="ENSMUSG00000007080"/>
      <node id="1098" label="ENSMUSG00000007379"/>
      <node id="1097" label="ENSMUSG00000007783"/>
      <node id="1096" label="ENSMUSG00000008461"/>
      <node id="1095" label="ENSMUSG00000008734"/>
      <node id="1094" label="ENSMUSG00000009378"/>
      <node id="1093" label="ENSMUSG00000009731"/>
      <node id="1092" label="ENSMUSG00000010066"/>
      <node id="1091" label="ENSMUSG00000010307"/>
      <node id="1090" label="ENSMUSG00000010803"/>
      <node id="1089" label="ENSMUSG00000011256"/>
      <node id="1088" label="ENSMUSG00000013921"/>
      <node id="1087" label="ENSMUSG00000014602"/>
      <node id="1086" label="ENSMUSG00000015222"/>
      <node id="1085" label="ENSMUSG00000015568"/>
      <node id="1084" label="ENSMUSG00000016763"/>
      <node id="1083" label="ENSMUSG00000017204"/>
      <node id="1082" label="ENSMUSG00000017211"/>
      <node id="1081" label="ENSMUSG00000017607"/>
      <node id="1080" label="ENSMUSG00000017639"/>
      <node id="1079" label="ENSMUSG00000017692"/>
      <node id="1078" label="ENSMUSG00000017943"/>
      <node id="1077" label="ENSMUSG00000018339"/>
      <node id="1076" label="ENSMUSG00000018470"/>
      <node id="1075" label="ENSMUSG00000018486"/>
      <node id="1074" label="ENSMUSG00000018554"/>
      <node id="1073" label="ENSMUSG00000018620"/>
      <node id="1072" label="ENSMUSG00000018672"/>
      <node id="1071" label="ENSMUSG00000018865"/>
      <node id="1070" label="ENSMUSG00000019122"/>
      <node id="1069" label="ENSMUSG00000019235"/>
      <node id="1068" label="ENSMUSG00000019775"/>
      <node id="1067" label="ENSMUSG00000019876"/>
      <node id="1066" label="ENSMUSG00000019890"/>
      <node id="1065" label="ENSMUSG00000019906"/>
      <node id="1064" label="ENSMUSG00000019944"/>
      <node id="1063" label="ENSMUSG00000019945"/>
      <node id="1062" label="ENSMUSG00000019989"/>
      <node id="1061" label="ENSMUSG00000019992"/>
      <node id="1060" label="ENSMUSG00000020019"/>
      <node id="1059" label="ENSMUSG00000020044"/>
      <node id="1058" label="ENSMUSG00000020086"/>
      <node id="1057" label="ENSMUSG00000020140"/>
      <node id="1056" label="ENSMUSG00000020151"/>
      <node id="1055" label="ENSMUSG00000020175"/>
      <node id="1054" label="ENSMUSG00000020176"/>
      <node id="1053" label="ENSMUSG00000020178"/>
      <node id="1052" label="ENSMUSG00000020256"/>
      <node id="1051" label="ENSMUSG00000020333"/>
      <node id="1050" label="ENSMUSG00000020381"/>
      <node id="1049" label="ENSMUSG00000020405"/>
      <node id="1048" label="ENSMUSG00000020431"/>
      <node id="1047" label="ENSMUSG00000020462"/>
      <node id="1046" label="ENSMUSG00000020469"/>
      <node id="1045" label="ENSMUSG00000020571"/>
      <node id="1044" label="ENSMUSG00000020576"/>
      <node id="1043" label="ENSMUSG00000020635"/>
      <node id="1042" label="ENSMUSG00000020682"/>
      <node id="1041" label="ENSMUSG00000020684"/>
      <node id="1040" label="ENSMUSG00000020717"/>
      <node id="1039" label="ENSMUSG00000020732"/>
      <node id="1038" label="ENSMUSG00000020886"/>
      <node id="1037" label="ENSMUSG00000020900"/>
      <node id="1036" label="ENSMUSG00000020953"/>
      <node id="1035" label="ENSMUSG00000021013"/>
      <node id="1034" label="ENSMUSG00000021136"/>
      <node id="1033" label="ENSMUSG00000021175"/>
      <node id="1032" label="ENSMUSG00000021265"/>
      <node id="1031" label="ENSMUSG00000021364"/>
      <node id="1030" label="ENSMUSG00000021403"/>
      <node id="1029" label="ENSMUSG00000021509"/>
      <node id="1028" label="ENSMUSG00000021539"/>
      <node id="1027" label="ENSMUSG00000021572"/>
      <node id="1026" label="ENSMUSG00000021604"/>
      <node id="1025" label="ENSMUSG00000021684"/>
      <node id="1024" label="ENSMUSG00000021700"/>
      <node id="1023" label="ENSMUSG00000021730"/>
      <node id="1022" label="ENSMUSG00000021838"/>
      <node id="1021" label="ENSMUSG00000021904"/>
      <node id="1020" label="ENSMUSG00000021986"/>
      <node id="1019" label="ENSMUSG00000022026"/>
      <node id="1018" label="ENSMUSG00000022033"/>
      <node id="1017" label="ENSMUSG00000022034"/>
      <node id="1016" label="ENSMUSG00000022211"/>
      <node id="1015" label="ENSMUSG00000022332"/>
      <node id="1014" label="ENSMUSG00000022456"/>
      <node id="1013" label="ENSMUSG00000022505"/>
      <node id="1012" label="ENSMUSG00000022512"/>
      <node id="1011" label="ENSMUSG00000022537"/>
      <node id="1010" label="ENSMUSG00000022598"/>
      <node id="1009" label="ENSMUSG00000022696"/>
      <node id="1008" label="ENSMUSG00000022773"/>
      <node id="1007" label="ENSMUSG00000022829"/>
      <node id="1006" label="ENSMUSG00000022844"/>
      <node id="1005" label="ENSMUSG00000022941"/>
      <node id="1004" label="ENSMUSG00000022978"/>
      <node id="1003" label="ENSMUSG00000023066"/>
      <node id="1002" label="ENSMUSG00000023191"/>
      <node id="1001" label="ENSMUSG00000023247"/>
      <node id="1000" label="ENSMUSG00000023387"/>
      <node id="999" label="ENSMUSG00000023886"/>
      <node id="998" label="ENSMUSG00000023963"/>
      <node id="997" label="ENSMUSG00000023966"/>
      <node id="996" label="ENSMUSG00000024028"/>
      <node id="995" label="ENSMUSG00000024029"/>
      <node id="994" label="ENSMUSG00000024074"/>
      <node id="993" label="ENSMUSG00000024112"/>
      <node id="992" label="ENSMUSG00000024177"/>
      <node id="991" label="ENSMUSG00000024215"/>
      <node id="990" label="ENSMUSG00000024225"/>
      <node id="989" label="ENSMUSG00000024302"/>
      <node id="988" label="ENSMUSG00000024304"/>
      <node id="987" label="ENSMUSG00000024352"/>
      <node id="986" label="ENSMUSG00000024386"/>
      <node id="985" label="ENSMUSG00000024411"/>
      <node id="984" label="ENSMUSG00000024501"/>
      <node id="983" label="ENSMUSG00000024511"/>
      <node id="982" label="ENSMUSG00000024512"/>
      <node id="981" label="ENSMUSG00000024548"/>
      <node id="980" label="ENSMUSG00000024553"/>
      <node id="979" label="ENSMUSG00000024873"/>
      <node id="978" label="ENSMUSG00000024905"/>
      <node id="977" label="ENSMUSG00000024912"/>
      <node id="976" label="ENSMUSG00000024972"/>
      <node id="975" label="ENSMUSG00000025002"/>
      <node id="974" label="ENSMUSG00000025020"/>
      <node id="973" label="ENSMUSG00000025026"/>
      <node id="972" label="ENSMUSG00000025075"/>
      <node id="971" label="ENSMUSG00000025085"/>
      <node id="970" label="ENSMUSG00000025089"/>
      <node id="969" label="ENSMUSG00000025175"/>
      <node id="968" label="ENSMUSG00000025265"/>
      <node id="967" label="ENSMUSG00000025268"/>
      <node id="966" label="ENSMUSG00000025329"/>
      <node id="965" label="ENSMUSG00000025347"/>
      <node id="964" label="ENSMUSG00000025395"/>
      <node id="963" label="ENSMUSG00000025405"/>
      <node id="962" label="ENSMUSG00000025432"/>
      <node id="961" label="ENSMUSG00000025479"/>
      <node id="960" label="ENSMUSG00000025515"/>
      <node id="959" label="ENSMUSG00000025582"/>
      <node id="958" label="ENSMUSG00000025602"/>
      <node id="957" label="ENSMUSG00000025608"/>
      <node id="956" label="ENSMUSG00000025658"/>
      <node id="955" label="ENSMUSG00000025701"/>
      <node id="954" label="ENSMUSG00000025739"/>
      <node id="953" label="ENSMUSG00000025867"/>
      <node id="952" label="ENSMUSG00000025991"/>
      <node id="951" label="ENSMUSG00000026131"/>
      <node id="950" label="ENSMUSG00000026163"/>
      <node id="949" label="ENSMUSG00000026255"/>
      <node id="948" label="ENSMUSG00000026288"/>
      <node id="947" label="ENSMUSG00000026303"/>
      <node id="946" label="ENSMUSG00000026321"/>
      <node id="945" label="ENSMUSG00000026322"/>
      <node id="944" label="ENSMUSG00000026347"/>
      <node id="943" label="ENSMUSG00000026442"/>
      <node id="942" label="ENSMUSG00000026475"/>
      <node id="941" label="ENSMUSG00000026482"/>
      <node id="940" label="ENSMUSG00000026483"/>
      <node id="939" label="ENSMUSG00000026520"/>
      <node id="938" label="ENSMUSG00000026610"/>
      <node id="937" label="ENSMUSG00000026620"/>
      <node id="936" label="ENSMUSG00000026686"/>
      <node id="935" label="ENSMUSG00000026726"/>
      <node id="934" label="ENSMUSG00000026737"/>
      <node id="933" label="ENSMUSG00000026765"/>
      <node id="932" label="ENSMUSG00000026782"/>
      <node id="931" label="ENSMUSG00000026828"/>
      <node id="930" label="ENSMUSG00000027074"/>
      <node id="929" label="ENSMUSG00000027203"/>
      <node id="928" label="ENSMUSG00000027360"/>
      <node id="927" label="ENSMUSG00000027379"/>
      <node id="926" label="ENSMUSG00000027581"/>
      <node id="925" label="ENSMUSG00000027612"/>
      <node id="924" label="ENSMUSG00000027635"/>
      <node id="923" label="ENSMUSG00000027674"/>
      <node id="922" label="ENSMUSG00000027684"/>
      <node id="921" label="ENSMUSG00000027748"/>
      <node id="920" label="ENSMUSG00000027797"/>
      <node id="919" label="ENSMUSG00000027801"/>
      <node id="918" label="ENSMUSG00000027876"/>
      <node id="917" label="ENSMUSG00000028008"/>
      <node id="916" label="ENSMUSG00000028019"/>
      <node id="915" label="ENSMUSG00000028039"/>
      <node id="914" label="ENSMUSG00000028068"/>
      <node id="913" label="ENSMUSG00000028088"/>
      <node id="912" label="ENSMUSG00000028111"/>
      <node id="911" label="ENSMUSG00000028226"/>
      <node id="910" label="ENSMUSG00000028236"/>
      <node id="909" label="ENSMUSG00000028255"/>
      <node id="908" label="ENSMUSG00000028289"/>
      <node id="907" label="ENSMUSG00000028356"/>
      <node id="906" label="ENSMUSG00000028389"/>
      <node id="905" label="ENSMUSG00000028391"/>
      <node id="904" label="ENSMUSG00000028415"/>
      <node id="903" label="ENSMUSG00000028427"/>
      <node id="902" label="ENSMUSG00000028444"/>
      <node id="901" label="ENSMUSG00000028457"/>
      <node id="900" label="ENSMUSG00000028532"/>
      <node id="899" label="ENSMUSG00000028539"/>
      <node id="898" label="ENSMUSG00000028555"/>
      <node id="897" label="ENSMUSG00000028597"/>
      <node id="896" label="ENSMUSG00000028631"/>
      <node id="895" label="ENSMUSG00000028766"/>
      <node id="894" label="ENSMUSG00000028785"/>
      <node id="893" label="ENSMUSG00000028860"/>
      <node id="892" label="ENSMUSG00000029054"/>
      <node id="891" label="ENSMUSG00000029096"/>
      <node id="890" label="ENSMUSG00000029101"/>
      <node id="889" label="ENSMUSG00000029121"/>
      <node id="888" label="ENSMUSG00000029123"/>
      <node id="887" label="ENSMUSG00000029134"/>
      <node id="886" label="ENSMUSG00000029195"/>
      <node id="885" label="ENSMUSG00000029279"/>
      <node id="884" label="ENSMUSG00000029335"/>
      <node id="883" label="ENSMUSG00000029436"/>
      <node id="882" label="ENSMUSG00000029541"/>
      <node id="881" label="ENSMUSG00000029570"/>
      <node id="880" label="ENSMUSG00000029591"/>
      <node id="879" label="ENSMUSG00000029596"/>
      <node id="878" label="ENSMUSG00000029700"/>
      <node id="877" label="ENSMUSG00000029712"/>
      <node id="876" label="ENSMUSG00000029716"/>
      <node id="875" label="ENSMUSG00000029762"/>
      <node id="874" label="ENSMUSG00000029765"/>
      <node id="873" label="ENSMUSG00000029862"/>
      <node id="872" label="ENSMUSG00000029865"/>
      <node id="871" label="ENSMUSG00000030048"/>
      <node id="870" label="ENSMUSG00000030087"/>
      <node id="869" label="ENSMUSG00000030110"/>
      <node id="868" label="ENSMUSG00000030137"/>
      <node id="867" label="ENSMUSG00000030287"/>
      <node id="866" label="ENSMUSG00000030340"/>
      <node id="865" label="ENSMUSG00000030353"/>
      <node id="864" label="ENSMUSG00000030401"/>
      <node id="863" label="ENSMUSG00000030543"/>
      <node id="862" label="ENSMUSG00000030616"/>
      <node id="861" label="ENSMUSG00000030772"/>
      <node id="860" label="ENSMUSG00000030787"/>
      <node id="859" label="ENSMUSG00000030935"/>
      <node id="858" label="ENSMUSG00000030978"/>
      <node id="857" label="ENSMUSG00000031144"/>
      <node id="856" label="ENSMUSG00000031150"/>
      <node id="855" label="ENSMUSG00000031220"/>
      <node id="854" label="ENSMUSG00000031227"/>
      <node id="853" label="ENSMUSG00000031262"/>
      <node id="852" label="ENSMUSG00000031284"/>
      <node id="851" label="ENSMUSG00000031355"/>
      <node id="850" label="ENSMUSG00000031373"/>
      <node id="849" label="ENSMUSG00000031387"/>
      <node id="848" label="ENSMUSG00000031410"/>
      <node id="847" label="ENSMUSG00000031558"/>
      <node id="846" label="ENSMUSG00000031562"/>
      <node id="845" label="ENSMUSG00000031626"/>
      <node id="844" label="ENSMUSG00000031669"/>
      <node id="843" label="ENSMUSG00000031778"/>
      <node id="842" label="ENSMUSG00000031844"/>
      <node id="841" label="ENSMUSG00000031849"/>
      <node id="840" label="ENSMUSG00000031919"/>
      <node id="839" label="ENSMUSG00000031980"/>
      <node id="838" label="ENSMUSG00000031981"/>
      <node id="837" label="ENSMUSG00000032015"/>
      <node id="836" label="ENSMUSG00000032017"/>
      <node id="835" label="ENSMUSG00000032034"/>
      <node id="834" label="ENSMUSG00000032035"/>
      <node id="833" label="ENSMUSG00000032092"/>
      <node id="832" label="ENSMUSG00000032113"/>
      <node id="831" label="ENSMUSG00000032186"/>
      <node id="830" label="ENSMUSG00000032232"/>
      <node id="829" label="ENSMUSG00000032238"/>
      <node id="828" label="ENSMUSG00000032278"/>
      <node id="827" label="ENSMUSG00000032289"/>
      <node id="826" label="ENSMUSG00000032315"/>
      <node id="825" label="ENSMUSG00000032346"/>
      <node id="824" label="ENSMUSG00000032397"/>
      <node id="823" label="ENSMUSG00000032417"/>
      <node id="822" label="ENSMUSG00000032420"/>
      <node id="821" label="ENSMUSG00000032482"/>
      <node id="820" label="ENSMUSG00000032502"/>
      <node id="819" label="ENSMUSG00000032532"/>
      <node id="818" label="ENSMUSG00000032558"/>
      <node id="817" label="ENSMUSG00000032586"/>
      <node id="816" label="ENSMUSG00000032852"/>
      <node id="815" label="ENSMUSG00000032854"/>
      <node id="814" label="ENSMUSG00000033022"/>
      <node id="813" label="ENSMUSG00000033032"/>
      <node id="812" label="ENSMUSG00000033177"/>
      <node id="811" label="ENSMUSG00000033200"/>
      <node id="810" label="ENSMUSG00000033222"/>
      <node id="809" label="ENSMUSG00000033389"/>
      <node id="808" label="ENSMUSG00000033579"/>
      <node id="807" label="ENSMUSG00000033590"/>
      <node id="806" label="ENSMUSG00000033634"/>
      <node id="805" label="ENSMUSG00000033763"/>
      <node id="804" label="ENSMUSG00000033825"/>
      <node id="803" label="ENSMUSG00000033871"/>
      <node id="802" label="ENSMUSG00000034112"/>
      <node id="801" label="ENSMUSG00000034118"/>
      <node id="800" label="ENSMUSG00000034303"/>
      <node id="799" label="ENSMUSG00000034472"/>
      <node id="798" label="ENSMUSG00000034528"/>
      <node id="797" label="ENSMUSG00000034648"/>
      <node id="796" label="ENSMUSG00000034656"/>
      <node id="795" label="ENSMUSG00000034675"/>
      <node id="794" label="ENSMUSG00000034677"/>
      <node id="793" label="ENSMUSG00000034785"/>
      <node id="792" label="ENSMUSG00000035200"/>
      <node id="791" label="ENSMUSG00000035277"/>
      <node id="790" label="ENSMUSG00000035390"/>
      <node id="789" label="ENSMUSG00000035431"/>
      <node id="788" label="ENSMUSG00000035615"/>
      <node id="787" label="ENSMUSG00000035683"/>
      <node id="786" label="ENSMUSG00000035699"/>
      <node id="785" label="ENSMUSG00000035775"/>
      <node id="784" label="ENSMUSG00000035896"/>
      <node id="783" label="ENSMUSG00000035984"/>
      <node id="782" label="ENSMUSG00000036053"/>
      <node id="781" label="ENSMUSG00000036225"/>
      <node id="780" label="ENSMUSG00000036304"/>
      <node id="779" label="ENSMUSG00000036327"/>
      <node id="778" label="ENSMUSG00000036437"/>
      <node id="777" label="ENSMUSG00000036492"/>
      <node id="776" label="ENSMUSG00000036766"/>
      <node id="775" label="ENSMUSG00000036782"/>
      <node id="774" label="ENSMUSG00000036872"/>
      <node id="773" label="ENSMUSG00000036944"/>
      <node id="772" label="ENSMUSG00000036989"/>
      <node id="771" label="ENSMUSG00000036995"/>
      <node id="770" label="ENSMUSG00000037033"/>
      <node id="769" label="ENSMUSG00000037035"/>
      <node id="768" label="ENSMUSG00000037106"/>
      <node id="767" label="ENSMUSG00000037126"/>
      <node id="766" label="ENSMUSG00000037275"/>
      <node id="765" label="ENSMUSG00000037474"/>
      <node id="764" label="ENSMUSG00000037509"/>
      <node id="763" label="ENSMUSG00000037621"/>
      <node id="762" label="ENSMUSG00000037624"/>
      <node id="761" label="ENSMUSG00000037712"/>
      <node id="760" label="ENSMUSG00000037725"/>
      <node id="759" label="ENSMUSG00000037762"/>
      <node id="758" label="ENSMUSG00000037784"/>
      <node id="757" label="ENSMUSG00000037852"/>
      <node id="756" label="ENSMUSG00000037942"/>
      <node id="755" label="ENSMUSG00000037962"/>
      <node id="754" label="ENSMUSG00000037973"/>
      <node id="753" label="ENSMUSG00000038209"/>
      <node id="752" label="ENSMUSG00000038296"/>
      <node id="751" label="ENSMUSG00000038305"/>
      <node id="750" label="ENSMUSG00000038349"/>
      <node id="749" label="ENSMUSG00000038555"/>
      <node id="748" label="ENSMUSG00000038560"/>
      <node id="747" label="ENSMUSG00000038692"/>
      <node id="746" label="ENSMUSG00000038903"/>
      <node id="745" label="ENSMUSG00000039187"/>
      <node id="744" label="ENSMUSG00000039200"/>
      <node id="743" label="ENSMUSG00000039396"/>
      <node id="742" label="ENSMUSG00000039601"/>
      <node id="741" label="ENSMUSG00000039629"/>
      <node id="740" label="ENSMUSG00000039748"/>
      <node id="739" label="ENSMUSG00000039765"/>
      <node id="738" label="ENSMUSG00000039809"/>
      <node id="737" label="ENSMUSG00000039831"/>
      <node id="736" label="ENSMUSG00000040016"/>
      <node id="735" label="ENSMUSG00000040118"/>
      <node id="734" label="ENSMUSG00000040121"/>
      <node id="733" label="ENSMUSG00000040152"/>
      <node id="732" label="ENSMUSG00000040170"/>
      <node id="731" label="ENSMUSG00000040181"/>
      <node id="730" label="ENSMUSG00000040387"/>
      <node id="729" label="ENSMUSG00000040389"/>
      <node id="728" label="ENSMUSG00000040433"/>
      <node id="727" label="ENSMUSG00000040584"/>
      <node id="726" label="ENSMUSG00000040613"/>
      <node id="725" label="ENSMUSG00000040694"/>
      <node id="724" label="ENSMUSG00000040714"/>
      <node id="723" label="ENSMUSG00000040891"/>
      <node id="722" label="ENSMUSG00000040972"/>
      <node id="721" label="ENSMUSG00000041000"/>
      <node id="720" label="ENSMUSG00000041261"/>
      <node id="719" label="ENSMUSG00000041268"/>
      <node id="718" label="ENSMUSG00000041301"/>
      <node id="717" label="ENSMUSG00000041323"/>
      <node id="716" label="ENSMUSG00000041351"/>
      <node id="715" label="ENSMUSG00000041406"/>
      <node id="714" label="ENSMUSG00000041420"/>
      <node id="713" label="ENSMUSG00000041476"/>
      <node id="712" label="ENSMUSG00000041577"/>
      <node id="711" label="ENSMUSG00000041608"/>
      <node id="710" label="ENSMUSG00000041658"/>
      <node id="709" label="ENSMUSG00000041688"/>
      <node id="708" label="ENSMUSG00000041729"/>
      <node id="707" label="ENSMUSG00000041734"/>
      <node id="706" label="ENSMUSG00000041794"/>
      <node id="705" label="ENSMUSG00000041801"/>
      <node id="704" label="ENSMUSG00000041889"/>
      <node id="703" label="ENSMUSG00000041974"/>
      <node id="702" label="ENSMUSG00000042041"/>
      <node id="701" label="ENSMUSG00000042179"/>
      <node id="700" label="ENSMUSG00000042215"/>
      <node id="699" label="ENSMUSG00000042303"/>
      <node id="698" label="ENSMUSG00000042306"/>
      <node id="697" label="ENSMUSG00000042371"/>
      <node id="696" label="ENSMUSG00000042515"/>
      <node id="695" label="ENSMUSG00000042631"/>
      <node id="694" label="ENSMUSG00000042712"/>
      <node id="693" label="ENSMUSG00000042750"/>
      <node id="692" label="ENSMUSG00000042763"/>
      <node id="691" label="ENSMUSG00000042804"/>
      <node id="690" label="ENSMUSG00000042842"/>
      <node id="689" label="ENSMUSG00000042942"/>
      <node id="688" label="ENSMUSG00000043015"/>
      <node id="687" label="ENSMUSG00000043029"/>
      <node id="686" label="ENSMUSG00000043388"/>
      <node id="685" label="ENSMUSG00000043419"/>
      <node id="684" label="ENSMUSG00000043461"/>
      <node id="683" label="ENSMUSG00000044017"/>
      <node id="682" label="ENSMUSG00000044033"/>
      <node id="681" label="ENSMUSG00000044313"/>
      <node id="680" label="ENSMUSG00000044468"/>
      <node id="679" label="ENSMUSG00000044626"/>
      <node id="678" label="ENSMUSG00000044646"/>
      <node id="677" label="ENSMUSG00000044912"/>
      <node id="676" label="ENSMUSG00000045064"/>
      <node id="675" label="ENSMUSG00000045215"/>
      <node id="674" label="ENSMUSG00000045273"/>
      <node id="673" label="ENSMUSG00000045281"/>
      <node id="672" label="ENSMUSG00000045763"/>
      <node id="671" label="ENSMUSG00000045790"/>
      <node id="670" label="ENSMUSG00000045871"/>
      <node id="669" label="ENSMUSG00000045912"/>
      <node id="668" label="ENSMUSG00000046058"/>
      <node id="667" label="ENSMUSG00000046070"/>
      <node id="666" label="ENSMUSG00000046160"/>
      <node id="665" label="ENSMUSG00000046178"/>
      <node id="664" label="ENSMUSG00000046204"/>
      <node id="663" label="ENSMUSG00000046215"/>
      <node id="662" label="ENSMUSG00000046295"/>
      <node id="661" label="ENSMUSG00000046352"/>
      <node id="660" label="ENSMUSG00000046402"/>
      <node id="659" label="ENSMUSG00000046442"/>
      <node id="658" label="ENSMUSG00000046480"/>
      <node id="657" label="ENSMUSG00000046589"/>
      <node id="656" label="ENSMUSG00000046613"/>
      <node id="655" label="ENSMUSG00000046841"/>
      <node id="654" label="ENSMUSG00000047344"/>
      <node id="653" label="ENSMUSG00000047473"/>
      <node id="652" label="ENSMUSG00000047702"/>
      <node id="651" label="ENSMUSG00000047730"/>
      <node id="650" label="ENSMUSG00000047963"/>
      <node id="649" label="ENSMUSG00000047996"/>
      <node id="648" label="ENSMUSG00000048078"/>
      <node id="647" label="ENSMUSG00000048200"/>
      <node id="646" label="ENSMUSG00000048330"/>
      <node id="645" label="ENSMUSG00000048776"/>
      <node id="644" label="ENSMUSG00000048807"/>
      <node id="643" label="ENSMUSG00000048899"/>
      <node id="642" label="ENSMUSG00000048905"/>
      <node id="641" label="ENSMUSG00000048911"/>
      <node id="640" label="ENSMUSG00000049307"/>
      <node id="639" label="ENSMUSG00000049536"/>
      <node id="638" label="ENSMUSG00000050234"/>
      <node id="637" label="ENSMUSG00000050321"/>
      <node id="636" label="ENSMUSG00000050359"/>
      <node id="635" label="ENSMUSG00000050410"/>
      <node id="634" label="ENSMUSG00000050447"/>
      <node id="633" label="ENSMUSG00000050473"/>
      <node id="632" label="ENSMUSG00000050505"/>
      <node id="631" label="ENSMUSG00000050511"/>
      <node id="630" label="ENSMUSG00000050520"/>
      <node id="629" label="ENSMUSG00000050711"/>
      <node id="628" label="ENSMUSG00000050751"/>
      <node id="627" label="ENSMUSG00000050824"/>
      <node id="626" label="ENSMUSG00000051003"/>
      <node id="625" label="ENSMUSG00000051043"/>
      <node id="624" label="ENSMUSG00000051067"/>
      <node id="623" label="ENSMUSG00000051209"/>
      <node id="622" label="ENSMUSG00000051251"/>
      <node id="621" label="ENSMUSG00000051314"/>
      <node id="620" label="ENSMUSG00000051517"/>
      <node id="619" label="ENSMUSG00000051951"/>
      <node id="618" label="ENSMUSG00000051980"/>
      <node id="617" label="ENSMUSG00000052062"/>
      <node id="616" label="ENSMUSG00000052212"/>
      <node id="615" label="ENSMUSG00000052271"/>
      <node id="614" label="ENSMUSG00000052364"/>
      <node id="613" label="ENSMUSG00000052852"/>
      <node id="612" label="ENSMUSG00000052921"/>
      <node id="611" label="ENSMUSG00000053004"/>
      <node id="610" label="ENSMUSG00000053046"/>
      <node id="609" label="ENSMUSG00000053158"/>
      <node id="608" label="ENSMUSG00000053219"/>
      <node id="607" label="ENSMUSG00000053279"/>
      <node id="606" label="ENSMUSG00000053310"/>
      <node id="605" label="ENSMUSG00000053702"/>
      <node id="604" label="ENSMUSG00000053765"/>
      <node id="603" label="ENSMUSG00000053852"/>
      <node id="602" label="ENSMUSG00000054034"/>
      <node id="601" label="ENSMUSG00000054146"/>
      <node id="600" label="ENSMUSG00000054484"/>
      <node id="599" label="ENSMUSG00000054555"/>
      <node id="598" label="ENSMUSG00000054630"/>
      <node id="597" label="ENSMUSG00000054659"/>
      <node id="596" label="ENSMUSG00000054764"/>
      <node id="595" label="ENSMUSG00000054932"/>
      <node id="594" label="ENSMUSG00000055172"/>
      <node id="593" label="ENSMUSG00000055210"/>
      <node id="592" label="ENSMUSG00000055493"/>
      <node id="591" label="ENSMUSG00000055567"/>
      <node id="590" label="ENSMUSG00000055610"/>
      <node id="589" label="ENSMUSG00000055629"/>
      <node id="588" label="ENSMUSG00000055730"/>
      <node id="587" label="ENSMUSG00000055745"/>
      <node id="586" label="ENSMUSG00000055809"/>
      <node id="585" label="ENSMUSG00000055862"/>
      <node id="584" label="ENSMUSG00000055912"/>
      <node id="583" label="ENSMUSG00000055978"/>
      <node id="582" label="ENSMUSG00000055980"/>
      <node id="581" label="ENSMUSG00000056035"/>
      <node id="580" label="ENSMUSG00000056050"/>
      <node id="579" label="ENSMUSG00000056648"/>
      <node id="578" label="ENSMUSG00000056724"/>
      <node id="577" label="ENSMUSG00000057092"/>
      <node id="576" label="ENSMUSG00000057182"/>
      <node id="575" label="ENSMUSG00000057400"/>
      <node id="574" label="ENSMUSG00000057406"/>
      <node id="573" label="ENSMUSG00000057541"/>
      <node id="572" label="ENSMUSG00000057604"/>
      <node id="571" label="ENSMUSG00000057614"/>
      <node id="570" label="ENSMUSG00000057897"/>
      <node id="569" label="ENSMUSG00000057933"/>
      <node id="568" label="ENSMUSG00000058063"/>
      <node id="567" label="ENSMUSG00000058392"/>
      <node id="566" label="ENSMUSG00000058740"/>
      <node id="565" label="ENSMUSG00000059149"/>
      <node id="564" label="ENSMUSG00000059406"/>
      <node id="563" label="ENSMUSG00000059493"/>
      <node id="562" label="ENSMUSG00000060208"/>
      <node id="561" label="ENSMUSG00000060600"/>
      <node id="560" label="ENSMUSG00000060615"/>
      <node id="559" label="ENSMUSG00000060961"/>
      <node id="558" label="ENSMUSG00000061292"/>
      <node id="557" label="ENSMUSG00000061462"/>
      <node id="556" label="ENSMUSG00000061601"/>
      <node id="555" label="ENSMUSG00000062184"/>
      <node id="554" label="ENSMUSG00000062210"/>
      <node id="553" label="ENSMUSG00000062252"/>
      <node id="552" label="ENSMUSG00000062410"/>
      <node id="551" label="ENSMUSG00000062826"/>
      <node id="550" label="ENSMUSG00000062995"/>
      <node id="549" label="ENSMUSG00000063142"/>
      <node id="548" label="ENSMUSG00000063704"/>
      <node id="547" label="ENSMUSG00000063727"/>
      <node id="546" label="ENSMUSG00000063851"/>
      <node id="545" label="ENSMUSG00000063929"/>
      <node id="544" label="ENSMUSG00000064080"/>
      <node id="543" label="ENSMUSG00000064109"/>
      <node id="542" label="ENSMUSG00000064158"/>
      <node id="541" label="ENSMUSG00000064165"/>
      <node id="540" label="ENSMUSG00000064177"/>
      <node id="539" label="ENSMUSG00000064326"/>
      <node id="538" label="ENSMUSG00000066191"/>
      <node id="537" label="ENSMUSG00000066607"/>
      <node id="536" label="ENSMUSG00000067750"/>
      <node id="535" label="ENSMUSG00000067818"/>
      <node id="534" label="ENSMUSG00000068154"/>
      <node id="533" label="ENSMUSG00000068270"/>
      <node id="532" label="ENSMUSG00000069792"/>
      <node id="531" label="ENSMUSG00000069920"/>
      <node id="530" label="ENSMUSG00000069922"/>
      <node id="529" label="ENSMUSG00000070034"/>
      <node id="528" label="ENSMUSG00000070366"/>
      <node id="527" label="ENSMUSG00000070423"/>
      <node id="526" label="ENSMUSG00000070577"/>
      <node id="525" label="ENSMUSG00000070687"/>
      <node id="524" label="ENSMUSG00000071226"/>
      <node id="523" label="ENSMUSG00000071551"/>
      <node id="522" label="ENSMUSG00000071553"/>
      <node id="521" label="ENSMUSG00000071847"/>
      <node id="520" label="ENSMUSG00000071856"/>
      <node id="519" label="ENSMUSG00000071984"/>
      <node id="518" label="ENSMUSG00000072294"/>
      <node id="517" label="ENSMUSG00000072623"/>
      <node id="516" label="ENSMUSG00000072812"/>
      <node id="515" label="ENSMUSG00000072849"/>
      <node id="514" label="ENSMUSG00000072875"/>
      <node id="513" label="ENSMUSG00000073293"/>
      <node id="512" label="ENSMUSG00000073530"/>
      <node id="511" label="ENSMUSG00000073680"/>
      <node id="510" label="ENSMUSG00000073705"/>
      <node id="509" label="ENSMUSG00000073889"/>
      <node id="508" label="ENSMUSG00000074004"/>
      <node id="507" label="ENSMUSG00000074625"/>
      <node id="506" label="ENSMUSG00000074651"/>
      <node id="505" label="ENSMUSG00000074825"/>
      <node id="504" label="ENSMUSG00000074867"/>
      <node id="503" label="ENSMUSG00000074882"/>
      <node id="502" label="ENSMUSG00000075012"/>
      <node id="501" label="ENSMUSG00000075270"/>
      <node id="500" label="ENSMUSG00000075289"/>
      <node id="499" label="ENSMUSG00000075610"/>
      <node id="498" label="ENSMUSG00000078185"/>
      <node id="497" label="ENSMUSG00000078234"/>
      <node id="496" label="ENSMUSG00000078485"/>
      <node id="495" label="ENSMUSG00000078502"/>
      <node id="494" label="ENSMUSG00000078521"/>
      <node id="493" label="ENSMUSG00000078776"/>
      <node id="492" label="ENSMUSG00000079015"/>
      <node id="491" label="ENSMUSG00000079056"/>
      <node id="490" label="ENSMUSG00000079497"/>
      <node id="489" label="ENSMUSG00000081769"/>
      <node id="488" label="ENSMUSG00000083282"/>
      <node id="487" label="ENSMUSG00000087230"/>
      <node id="486" label="ENSMUSG00000089901"/>
      <node id="485" label="ENSMUSG00000090291"/>
      <node id="484" label="ENSMUSG00000091243"/>
      <node id="483" label="ENSMUSG00000091721"/>
      <node id="482" label="ENSMUSG00000094305"/>
      <node id="481" label="ENSMUSG00000095567"/>
      <node id="480" label="ENSMUSG00000095930"/>
      <node id="479" label="ENSMUSG00000096146"/>
      <node id="478" label="ENSMUSG00000103392"/>
      <node id="477" label="ENSMUSG00000111709"/>
      <node id="476" label="ENSMUSG00000000632"/>
      <node id="475" label="ENSMUSG00000008575"/>
      <node id="474" label="ENSMUSG00000014846"/>
      <node id="473" label="ENSMUSG00000015829"/>
      <node id="472" label="ENSMUSG00000018581"/>
      <node id="471" label="ENSMUSG00000019467"/>
      <node id="470" label="ENSMUSG00000020143"/>
      <node id="469" label="ENSMUSG00000020651"/>
      <node id="468" label="ENSMUSG00000021541"/>
      <node id="467" label="ENSMUSG00000021763"/>
      <node id="466" label="ENSMUSG00000022705"/>
      <node id="465" label="ENSMUSG00000023078"/>
      <node id="464" label="ENSMUSG00000023906"/>
      <node id="463" label="ENSMUSG00000024084"/>
      <node id="462" label="ENSMUSG00000024730"/>
      <node id="461" label="ENSMUSG00000024990"/>
      <node id="460" label="ENSMUSG00000025403"/>
      <node id="459" label="ENSMUSG00000025497"/>
      <node id="458" label="ENSMUSG00000025528"/>
      <node id="457" label="ENSMUSG00000025592"/>
      <node id="456" label="ENSMUSG00000025665"/>
      <node id="455" label="ENSMUSG00000026204"/>
      <node id="454" label="ENSMUSG00000026223"/>
      <node id="453" label="ENSMUSG00000026389"/>
      <node id="452" label="ENSMUSG00000026432"/>
      <node id="451" label="ENSMUSG00000026489"/>
      <node id="450" label="ENSMUSG00000026531"/>
      <node id="449" label="ENSMUSG00000027297"/>
      <node id="448" label="ENSMUSG00000027350"/>
      <node id="447" label="ENSMUSG00000028262"/>
      <node id="446" label="ENSMUSG00000028438"/>
      <node id="445" label="ENSMUSG00000028713"/>
      <node id="444" label="ENSMUSG00000028933"/>
      <node id="443" label="ENSMUSG00000029283"/>
      <node id="442" label="ENSMUSG00000029821"/>
      <node id="441" label="ENSMUSG00000030518"/>
      <node id="440" label="ENSMUSG00000031253"/>
      <node id="439" label="ENSMUSG00000031430"/>
      <node id="438" label="ENSMUSG00000031635"/>
      <node id="437" label="ENSMUSG00000032086"/>
      <node id="436" label="ENSMUSG00000032181"/>
      <node id="435" label="ENSMUSG00000032192"/>
      <node id="434" label="ENSMUSG00000032348"/>
      <node id="433" label="ENSMUSG00000032377"/>
      <node id="432" label="ENSMUSG00000032564"/>
      <node id="431" label="ENSMUSG00000032625"/>
      <node id="430" label="ENSMUSG00000032679"/>
      <node id="429" label="ENSMUSG00000032726"/>
      <node id="428" label="ENSMUSG00000033033"/>
      <node id="427" label="ENSMUSG00000033083"/>
      <node id="426" label="ENSMUSG00000034591"/>
      <node id="425" label="ENSMUSG00000034871"/>
      <node id="424" label="ENSMUSG00000035930"/>
      <node id="423" label="ENSMUSG00000036912"/>
      <node id="422" label="ENSMUSG00000037217"/>
      <node id="421" label="ENSMUSG00000037617"/>
      <node id="420" label="ENSMUSG00000038112"/>
      <node id="419" label="ENSMUSG00000038312"/>
      <node id="418" label="ENSMUSG00000039103"/>
      <node id="417" label="ENSMUSG00000039419"/>
      <node id="416" label="ENSMUSG00000040605"/>
      <node id="415" label="ENSMUSG00000040747"/>
      <node id="414" label="ENSMUSG00000040987"/>
      <node id="413" label="ENSMUSG00000041995"/>
      <node id="412" label="ENSMUSG00000042675"/>
      <node id="411" label="ENSMUSG00000047641"/>
      <node id="410" label="ENSMUSG00000047749"/>
      <node id="409" label="ENSMUSG00000049044"/>
      <node id="408" label="ENSMUSG00000049409"/>
      <node id="407" label="ENSMUSG00000049670"/>
      <node id="406" label="ENSMUSG00000050821"/>
      <node id="405" label="ENSMUSG00000050822"/>
      <node id="404" label="ENSMUSG00000051579"/>
      <node id="403" label="ENSMUSG00000052520"/>
      <node id="402" label="ENSMUSG00000053783"/>
      <node id="401" label="ENSMUSG00000054169"/>
      <node id="400" label="ENSMUSG00000054423"/>
      <node id="399" label="ENSMUSG00000055963"/>
      <node id="398" label="ENSMUSG00000057346"/>
      <node id="397" label="ENSMUSG00000059708"/>
      <node id="396" label="ENSMUSG00000061762"/>
      <node id="395" label="ENSMUSG00000062591"/>
      <node id="394" label="ENSMUSG00000064246"/>
      <node id="393" label="ENSMUSG00000066090"/>
      <node id="392" label="ENSMUSG00000067229"/>
      <node id="391" label="ENSMUSG00000067724"/>
      <node id="390" label="ENSMUSG00000068617"/>
      <node id="389" label="ENSMUSG00000072244"/>
      <node id="388" label="ENSMUSG00000075701"/>
      <node id="387" label="ENSMUSG00000078963"/>
      <node id="386" label="ENSMUSG00000079180"/>
      <node id="385" label="ENSMUSG00000085007"/>
      <node id="384" label="ENSMUSG00000095448"/>
      <node id="383" label="ENSMUSG00000096001"/>
      <node id="382" label="ENSMUSG00000110573"/>
      <node id="381" label="ENSMUSG00000042834"/>
      <node id="380" label="ENSMUSG00000000037"/>
      <node id="379" label="ENSMUSG00000001366"/>
      <node id="378" label="ENSMUSG00000002297"/>
      <node id="377" label="ENSMUSG00000003824"/>
      <node id="376" label="ENSMUSG00000004540"/>
      <node id="375" label="ENSMUSG00000017311"/>
      <node id="374" label="ENSMUSG00000018924"/>
      <node id="373" label="ENSMUSG00000019888"/>
      <node id="372" label="ENSMUSG00000019987"/>
      <node id="371" label="ENSMUSG00000020032"/>
      <node id="370" label="ENSMUSG00000020534"/>
      <node id="369" label="ENSMUSG00000020627"/>
      <node id="368" label="ENSMUSG00000021070"/>
      <node id="367" label="ENSMUSG00000022199"/>
      <node id="366" label="ENSMUSG00000022661"/>
      <node id="365" label="ENSMUSG00000023192"/>
      <node id="364" label="ENSMUSG00000024313"/>
      <node id="363" label="ENSMUSG00000024330"/>
      <node id="362" label="ENSMUSG00000024660"/>
      <node id="361" label="ENSMUSG00000024771"/>
      <node id="360" label="ENSMUSG00000027298"/>
      <node id="359" label="ENSMUSG00000027331"/>
      <node id="358" label="ENSMUSG00000027496"/>
      <node id="357" label="ENSMUSG00000028332"/>
      <node id="356" label="ENSMUSG00000029363"/>
      <node id="355" label="ENSMUSG00000030641"/>
      <node id="354" label="ENSMUSG00000030782"/>
      <node id="353" label="ENSMUSG00000031099"/>
      <node id="352" label="ENSMUSG00000031255"/>
      <node id="351" label="ENSMUSG00000031377"/>
      <node id="350" label="ENSMUSG00000031570"/>
      <node id="349" label="ENSMUSG00000032064"/>
      <node id="348" label="ENSMUSG00000032860"/>
      <node id="347" label="ENSMUSG00000034923"/>
      <node id="346" label="ENSMUSG00000035246"/>
      <node id="345" label="ENSMUSG00000035697"/>
      <node id="344" label="ENSMUSG00000036109"/>
      <node id="343" label="ENSMUSG00000036264"/>
      <node id="342" label="ENSMUSG00000037216"/>
      <node id="341" label="ENSMUSG00000039231"/>
      <node id="340" label="ENSMUSG00000040274"/>
      <node id="339" label="ENSMUSG00000042312"/>
      <node id="338" label="ENSMUSG00000043518"/>
      <node id="337" label="ENSMUSG00000044921"/>
      <node id="336" label="ENSMUSG00000046634"/>
      <node id="335" label="ENSMUSG00000047242"/>
      <node id="334" label="ENSMUSG00000048763"/>
      <node id="333" label="ENSMUSG00000049047"/>
      <node id="332" label="ENSMUSG00000049871"/>
      <node id="331" label="ENSMUSG00000050192"/>
      <node id="330" label="ENSMUSG00000050379"/>
      <node id="329" label="ENSMUSG00000050394"/>
      <node id="328" label="ENSMUSG00000056492"/>
      <node id="327" label="ENSMUSG00000058260"/>
      <node id="326" label="ENSMUSG00000061758"/>
      <node id="325" label="ENSMUSG00000062510"/>
      <node id="324" label="ENSMUSG00000064213"/>
      <node id="323" label="ENSMUSG00000066366"/>
      <node id="322" label="ENSMUSG00000068246"/>
      <node id="321" label="ENSMUSG00000071113"/>
      <node id="320" label="ENSMUSG00000071723"/>
      <node id="319" label="ENSMUSG00000073399"/>
      <node id="318" label="ENSMUSG00000073764"/>
      <node id="317" label="ENSMUSG00000075296"/>
      <node id="316" label="ENSMUSG00000098132"/>
      <node id="315" label="ENSMUSG00000028108"/>
      <node id="314" label="ENSMUSG00000024986"/>
      <node id="313" label="ENSMUSG00000036564"/>
      <node id="312" label="ENSMUSG00000032323"/>
      <node id="311" label="ENSMUSG00000061533"/>
      <node id="310" label="ENSMUSG00000013338"/>
      <node id="309" label="ENSMUSG00000019737"/>
      <node id="308" label="ENSMUSG00000028496"/>
      <node id="307" label="ENSMUSG00000044024"/>
      <node id="306" label="ENSMUSG00000031073"/>
      <node id="305" label="ENSMUSG00000039239"/>
      <node id="304" label="ENSMUSG00000027434"/>
      <node id="303" label="ENSMUSG00000034701"/>
      <node id="302" label="ENSMUSG00000025574"/>
      <node id="301" label="ENSMUSG00000027353"/>
      <node id="300" label="ENSMUSG00000038126"/>
      <node id="299" label="ENSMUSG00000050556"/>
      <node id="298" label="ENSMUSG00000028466"/>
      <node id="297" label="ENSMUSG00000031770"/>
      <node id="296" label="ENSMUSG00000019429"/>
      <node id="295" label="ENSMUSG00000027223"/>
      <node id="294" label="ENSMUSG00000037979"/>
      <node id="293" label="ENSMUSG00000031465"/>
      <node id="292" label="ENSMUSG00000036768"/>
      <node id="291" label="ENSMUSG00000042743"/>
      <node id="290" label="ENSMUSG00000044702"/>
      <node id="289" label="ENSMUSG00000044860"/>
      <node id="288" label="ENSMUSG00000047228"/>
      <node id="287" label="ENSMUSG00000051735"/>
      <node id="286" label="ENSMUSG00000054453"/>
      <node id="285" label="ENSMUSG00000071648"/>
      <node id="284" label="ENSMUSG00000044453"/>
      <node id="283" label="ENSMUSG00000020592"/>
      <node id="282" label="ENSMUSG00000021965"/>
      <node id="281" label="ENSMUSG00000019917"/>
      <node id="280" label="ENSMUSG00000038742"/>
      <node id="279" label="ENSMUSG00000020774"/>
      <node id="278" label="ENSMUSG00000027220"/>
      <node id="277" label="ENSMUSG00000056004"/>
      <node id="276" label="ENSMUSG00000074444"/>
      <node id="275" label="ENSMUSG00000094840"/>
      <node id="274" label="ENSMUSG00000037279"/>
      <node id="273" label="ENSMUSG00000023505"/>
      <node id="272" label="ENSMUSG00000028587"/>
      <node id="271" label="ENSMUSG00000062867"/>
      <node id="270" label="ENSMUSG00000075588"/>
      <node id="269" label="ENSMUSG00000056296"/>
      <node id="268" label="ENSMUSG00000081058"/>
      <node id="267" label="ENSMUSG00000051235"/>
      <node id="266" label="ENSMUSG00000044312"/>
      <node id="265" label="ENSMUSG00000046179"/>
      <node id="264" label="ENSMUSG00000052942"/>
      <node id="263" label="ENSMUSG00000038765"/>
      <node id="262" label="ENSMUSG00000040146"/>
      <node id="261" label="ENSMUSG00000051331"/>
      <node id="260" label="ENSMUSG00000084797"/>
      <node id="259" label="ENSMUSG00000103965"/>
      <node id="258" label="ENSMUSG00000105146"/>
      <node id="257" label="ENSMUSG00000066176"/>
      <node id="256" label="ENSMUSG00000085183"/>
      <node id="255" label="ENSMUSG00000103043"/>
      <node id="254" label="ENSMUSG00000106658"/>
      <node id="253" label="ENSMUSG00000097561"/>
      <node id="252" label="ENSMUSG00000103067"/>
      <node id="251" label="ENSMUSG00000109936"/>
      <node id="250" label="ENSMUSG00000111043"/>
      <node id="249" label="ENSMUSG00000029878"/>
      <node id="248" label="ENSMUSG00000097709"/>
      <node id="247" label="ENSMUSG00000100022"/>
      <node id="246" label="ENSMUSG00000097059"/>
      <node id="245" label="ENSMUSG00000097932"/>
      <node id="244" label="ENSMUSG00000099552"/>
      <node id="243" label="ENSMUSG00000097284"/>
      <node id="242" label="ENSMUSG00000110276"/>
      <node id="241" label="ENSMUSG00000107879"/>
      <node id="240" label="ENSMUSG00000107728"/>
      <node id="239" label="ENSMUSG00000097415"/>
      <node id="238" label="ENSMUSG00000069713"/>
      <node id="237" label="ENSMUSG00000110866"/>
      <node id="236" label="ENSMUSG00000099025"/>
      <node id="235" label="ENSMUSG00000111528"/>
      <node id="234" label="ENSMUSG00000111857"/>
      <node id="233" label="ENSMUSG00000085152"/>
      <node id="232" label="ENSMUSG00000102123"/>
      <node id="231" label="ENSMUSG00000099364"/>
      <node id="230" label="ENSMUSG00000075010"/>
      <node id="229" label="ENSMUSG00000097632"/>
      <node id="228" label="ENSMUSG00000087196"/>
      <node id="227" label="ENSMUSG00000086141"/>
      <node id="226" label="ENSMUSG00000085329"/>
      <node id="225" label="ENSMUSG00000097515"/>
      <node id="224" label="ENSMUSG00000106634"/>
      <node id="223" label="ENSMUSG00000086847"/>
      <node id="222" label="mmu-miR-101c"/>
      <node id="221" label="mmu-miR-1945"/>
      <node id="220" label="ENSMUSG00000075511"/>
      <node id="219" label="ENSMUSG00000086503"/>
      <node id="218" label="ENSMUSG00000096954"/>
      <node id="217" label="mmu-miR-222-3p"/>
      <node id="216" label="ENSMUSG00000096944"/>
      <node id="215" label="ENSMUSG00000099519"/>
      <node id="214" label="ENSMUSG00000064043"/>
      <node id="213" label="ENSMUSG00000106847"/>
      <node id="212" label="mmu-miR-497a-5p"/>
      <node id="211" label="ENSMUSG00000072694"/>
      <node id="210" label="mmu-miR-7a-5p"/>
      <node id="209" label="ENSMUSG00000070392"/>
      <node id="208" label="mmu-miR-677-5p"/>
      <node id="207" label="mmu-miR-210-3p"/>
      <node id="206" label="mmu-miR-130a-3p"/>
      <node id="205" label="mmu-miR-195a-5p"/>
      <node id="204" label="mmu-let-7e-5p"/>
      <node id="203" label="mmu-miR-101a-3p"/>
      <node id="202" label="ENSMUSG00000049881"/>
      <node id="201" label="ENSMUSG00000097101"/>
      <node id="200" label="mmu-miR-218-5p"/>
      <node id="199" label="mmu-miR-152-3p"/>
      <node id="198" label="ENSMUSG00000097131"/>
      <node id="197" label="mmu-miR-127-3p"/>
      <node id="196" label="mmu-miR-574-3p"/>
      <node id="195" label="mmu-miR-411-5p"/>
      <node id="194" label="mmu-miR-434-3p"/>
      <node id="193" label="ENSMUSG00000018548"/>
      <node id="192" label="ENSMUSG00000022043"/>
      <node id="191" label="ENSMUSG00000021952"/>
      <node id="190" label="ENSMUSG00000027822"/>
      <node id="189" label="ENSMUSG00000034111"/>
      <node id="188" label="ENSMUSG00000031596"/>
      <node id="187" label="ENSMUSG00000037822"/>
      <node id="186" label="ENSMUSG00000041741"/>
      <node id="185" label="ENSMUSG00000054723"/>
      <node id="184" label="mmu-miR-540-3p"/>
      <node id="183" label="ENSMUSG00000002265"/>
      <node id="182" label="ENSMUSG00000027808"/>
      <node id="181" label="ENSMUSG00000031557"/>
      <node id="180" label="ENSMUSG00000006273"/>
      <node id="179" label="ENSMUSG00000020225"/>
      <node id="178" label="ENSMUSG00000027605"/>
      <node id="177" label="ENSMUSG00000044934"/>
      <node id="176" label="mmu-miR-350-5p"/>
      <node id="175" label="ENSMUSG00000003053"/>
      <node id="174" label="ENSMUSG00000032204"/>
      <node id="173" label="ENSMUSG00000014905"/>
      <node id="172" label="ENSMUSG00000020941"/>
      <node id="171" label="ENSMUSG00000022358"/>
      <node id="170" label="ENSMUSG00000021569"/>
      <node id="169" label="ENSMUSG00000025271"/>
      <node id="168" label="ENSMUSG00000030867"/>
      <node id="167" label="ENSMUSG00000030737"/>
      <node id="166" label="ENSMUSG00000034614"/>
      <node id="165" label="ENSMUSG00000033411"/>
      <node id="164" label="ENSMUSG00000032409"/>
      <node id="163" label="ENSMUSG00000038224"/>
      <node id="162" label="ENSMUSG00000038178"/>
      <node id="161" label="ENSMUSG00000038507"/>
      <node id="160" label="ENSMUSG00000040195"/>
      <node id="159" label="ENSMUSG00000040699"/>
      <node id="158" label="ENSMUSG00000038943"/>
      <node id="157" label="ENSMUSG00000048012"/>
      <node id="156" label="ENSMUSG00000056394"/>
      <node id="155" label="mmu-miR-153-3p"/>
      <node id="154" label="ENSMUSG00000009394"/>
      <node id="153" label="ENSMUSG00000029033"/>
      <node id="152" label="ENSMUSG00000023036"/>
      <node id="151" label="ENSMUSG00000026235"/>
      <node id="150" label="ENSMUSG00000025738"/>
      <node id="149" label="ENSMUSG00000026473"/>
      <node id="148" label="ENSMUSG00000036422"/>
      <node id="147" label="ENSMUSG00000031749"/>
      <node id="146" label="ENSMUSG00000031442"/>
      <node id="145" label="ENSMUSG00000032575"/>
      <node id="144" label="ENSMUSG00000038264"/>
      <node id="143" label="ENSMUSG00000031647"/>
      <node id="142" label="ENSMUSG00000052727"/>
      <node id="141" label="ENSMUSG00000040896"/>
      <node id="140" label="ENSMUSG00000056812"/>
      <node id="139" label="mmu-miR-410-3p"/>
      <node id="138" label="ENSMUSG00000009418"/>
      <node id="137" label="ENSMUSG00000015837"/>
      <node id="136" label="ENSMUSG00000014444"/>
      <node id="135" label="ENSMUSG00000022091"/>
      <node id="134" label="ENSMUSG00000026259"/>
      <node id="133" label="ENSMUSG00000031561"/>
      <node id="132" label="ENSMUSG00000032997"/>
      <node id="131" label="ENSMUSG00000033174"/>
      <node id="130" label="ENSMUSG00000037239"/>
      <node id="129" label="ENSMUSG00000035274"/>
      <node id="128" label="ENSMUSG00000038248"/>
      <node id="127" label="ENSMUSG00000038893"/>
      <node id="126" label="ENSMUSG00000042851"/>
      <node id="125" label="ENSMUSG00000042367"/>
      <node id="124" label="ENSMUSG00000042828"/>
      <node id="123" label="ENSMUSG00000070056"/>
      <node id="122" label="mmu-miR-125a-5p"/>
      <node id="121" label="ENSMUSG00000000751"/>
      <node id="120" label="ENSMUSG00000027947"/>
      <node id="119" label="mmu-miR-676-3p"/>
      <node id="118" label="ENSMUSG00000001105"/>
      <node id="117" label="ENSMUSG00000016262"/>
      <node id="116" label="ENSMUSG00000026797"/>
      <node id="115" label="ENSMUSG00000027699"/>
      <node id="114" label="ENSMUSG00000032557"/>
      <node id="113" label="ENSMUSG00000046743"/>
      <node id="112" label="ENSMUSG00000063160"/>
      <node id="111" label="ENSMUSG00000057315"/>
      <node id="110" label="ENSMUSG00000020101"/>
      <node id="109" label="ENSMUSG00000022231"/>
      <node id="108" label="ENSMUSG00000028207"/>
      <node id="107" label="ENSMUSG00000027248"/>
      <node id="106" label="ENSMUSG00000028737"/>
      <node id="105" label="ENSMUSG00000030946"/>
      <node id="104" label="ENSMUSG00000044068"/>
      <node id="103" label="ENSMUSG00000054252"/>
      <node id="102" label="mmu-miR-134-5p"/>
      <node id="101" label="mmu-miR-221-5p"/>
      <node id="100" label="ENSMUSG00000080316"/>
      <node id="99" label="mmu-miR-125b-1-3p"/>
      <node id="98" label="ENSMUSG00000039485"/>
      <node id="97" label="ENSMUSG00000068923"/>
      <node id="96" label="ENSMUSG00000000058"/>
      <node id="95" label="ENSMUSG00000021373"/>
      <node id="94" label="ENSMUSG00000022711"/>
      <node id="93" label="ENSMUSG00000024691"/>
      <node id="92" label="ENSMUSG00000028463"/>
      <node id="91" label="ENSMUSG00000048482"/>
      <node id="90" label="ENSMUSG00000060935"/>
      <node id="89" label="ENSMUSG00000014813"/>
      <node id="88" label="ENSMUSG00000018698"/>
      <node id="87" label="ENSMUSG00000021062"/>
      <node id="86" label="ENSMUSG00000020848"/>
      <node id="85" label="ENSMUSG00000021266"/>
      <node id="84" label="ENSMUSG00000022369"/>
      <node id="83" label="ENSMUSG00000026558"/>
      <node id="82" label="ENSMUSG00000031202"/>
      <node id="81" label="ENSMUSG00000031748"/>
      <node id="80" label="ENSMUSG00000036533"/>
      <node id="79" label="ENSMUSG00000044365"/>
      <node id="78" label="ENSMUSG00000043496"/>
      <node id="77" label="ENSMUSG00000046387"/>
      <node id="76" label="ENSMUSG00000047238"/>
      <node id="75" label="ENSMUSG00000052229"/>
      <node id="74" label="ENSMUSG00000053931"/>
      <node id="73" label="ENSMUSG00000067377"/>
      <node id="72" label="ENSMUSG00000089774"/>
      <edge id="21370" label="ENSMUSG00000010175 (TF-TG) ENSMUSG00000029275" source="2197" target="2196" cy:directed="1"/>
      <edge id="21369" label="ENSMUSG00000010175 (TF-TG) ENSMUSG00000026923" source="2197" target="2177" cy:directed="1"/>
      <edge id="21368" label="ENSMUSG00000010175 (TF-TG) ENSMUSG00000038530" source="2197" target="1398" cy:directed="1"/>
      <edge id="21367" label="ENSMUSG00000010175 (TF-TG) ENSMUSG00000059588" source="2197" target="1397" cy:directed="1"/>
      <edge id="21366" label="ENSMUSG00000029275 (TF-TG) ENSMUSG00000026815" source="2196" target="1300" cy:directed="1"/>
      <edge id="21365" label="ENSMUSG00000017146 (TF-TG) ENSMUSG00000027323" source="2195" target="2194" cy:directed="1"/>
      <edge id="21364" label="ENSMUSG00000017146 (TF-TG) ENSMUSG00000041147" source="2195" target="2193" cy:directed="1"/>
      <edge id="21363" label="ENSMUSG00000017146 (TF-TG) ENSMUSG00000005533" source="2195" target="2131" cy:directed="1"/>
      <edge id="21362" label="ENSMUSG00000017146 (TF-TG) ENSMUSG00000029910" source="2195" target="1945" cy:directed="1"/>
      <edge id="21361" label="ENSMUSG00000017146 (TF-TG) ENSMUSG00000056758" source="2195" target="1355" cy:directed="1"/>
      <edge id="21360" label="ENSMUSG00000017861 (TF-TG) ENSMUSG00000027793" source="2192" target="2191" cy:directed="1"/>
      <edge id="21359" label="ENSMUSG00000017861 (TF-TG) ENSMUSG00000017861" source="2192" target="2192" cy:directed="1"/>
      <edge id="21358" label="ENSMUSG00000017861 (TF-TG) ENSMUSG00000070348" source="2192" target="2174" cy:directed="1"/>
      <edge id="21357" label="ENSMUSG00000018899 (TF-TG) ENSMUSG00000039236" source="2190" target="2189" cy:directed="1"/>
      <edge id="21356" label="ENSMUSG00000018899 (TF-TG) ENSMUSG00000000126" source="2190" target="1669" cy:directed="1"/>
      <edge id="21355" label="ENSMUSG00000018899 (TF-TG) ENSMUSG00000000555" source="2190" target="1352" cy:directed="1"/>
      <edge id="21354" label="ENSMUSG00000018899 (TF-TG) ENSMUSG00000001025" source="2190" target="1535" cy:directed="1"/>
      <edge id="21353" label="ENSMUSG00000018899 (TF-TG) ENSMUSG00000001281" source="2190" target="1351" cy:directed="1"/>
      <edge id="21352" label="ENSMUSG00000018899 (TF-TG) ENSMUSG00000001761" source="2190" target="1350" cy:directed="1"/>
      <edge id="21351" label="ENSMUSG00000018899 (TF-TG) ENSMUSG00000002227" source="2190" target="2147" cy:directed="1"/>
      <edge id="21350" label="ENSMUSG00000018899 (TF-TG) ENSMUSG00000002489" source="2190" target="2146" cy:directed="1"/>
      <edge id="21349" label="ENSMUSG00000018899 (TF-TG) ENSMUSG00000002668" source="2190" target="1349" cy:directed="1"/>
      <edge id="21348" label="ENSMUSG00000018899 (TF-TG) ENSMUSG00000002835" source="2190" target="2144" cy:directed="1"/>
      <edge id="21347" label="ENSMUSG00000018899 (TF-TG) ENSMUSG00000002885" source="2190" target="2142" cy:directed="1"/>
      <edge id="21346" label="ENSMUSG00000018899 (TF-TG) ENSMUSG00000002997" source="2190" target="2141" cy:directed="1"/>
      <edge id="21345" label="ENSMUSG00000018899 (TF-TG) ENSMUSG00000003032" source="2190" target="2140" cy:directed="1"/>
      <edge id="21344" label="ENSMUSG00000018899 (TF-TG) ENSMUSG00000003134" source="2190" target="2139" cy:directed="1"/>
      <edge id="21343" label="ENSMUSG00000018899 (TF-TG) ENSMUSG00000003228" source="2190" target="1348" cy:directed="1"/>
      <edge id="21342" label="ENSMUSG00000018899 (TF-TG) ENSMUSG00000003469" source="2190" target="1347" cy:directed="1"/>
      <edge id="21341" label="ENSMUSG00000018899 (TF-TG) ENSMUSG00000003541" source="2190" target="1346" cy:directed="1"/>
      <edge id="21340" label="ENSMUSG00000018899 (TF-TG) ENSMUSG00000003545" source="2190" target="2137" cy:directed="1"/>
      <edge id="21339" label="ENSMUSG00000018899 (TF-TG) ENSMUSG00000003992" source="2190" target="2136" cy:directed="1"/>
      <edge id="21338" label="ENSMUSG00000018899 (TF-TG) ENSMUSG00000004113" source="2190" target="1666" cy:directed="1"/>
      <edge id="21337" label="ENSMUSG00000018899 (TF-TG) ENSMUSG00000004151" source="2190" target="2135" cy:directed="1"/>
      <edge id="21336" label="ENSMUSG00000018899 (TF-TG) ENSMUSG00000004366" source="2190" target="1665" cy:directed="1"/>
      <edge id="21335" label="ENSMUSG00000018899 (TF-TG) ENSMUSG00000004709" source="2190" target="1345" cy:directed="1"/>
      <edge id="21334" label="ENSMUSG00000018899 (TF-TG) ENSMUSG00000004951" source="2190" target="1532" cy:directed="1"/>
      <edge id="21333" label="ENSMUSG00000018899 (TF-TG) ENSMUSG00000004952" source="2190" target="1344" cy:directed="1"/>
      <edge id="21332" label="ENSMUSG00000018899 (TF-TG) ENSMUSG00000005267" source="2190" target="2134" cy:directed="1"/>
      <edge id="21331" label="ENSMUSG00000018899 (TF-TG) ENSMUSG00000005360" source="2190" target="1664" cy:directed="1"/>
      <edge id="21330" label="ENSMUSG00000018899 (TF-TG) ENSMUSG00000005410" source="2190" target="2132" cy:directed="1"/>
      <edge id="21329" label="ENSMUSG00000018899 (TF-TG) ENSMUSG00000005533" source="2190" target="2131" cy:directed="1"/>
      <edge id="21328" label="ENSMUSG00000018899 (TF-TG) ENSMUSG00000005873" source="2190" target="1343" cy:directed="1"/>
      <edge id="21327" label="ENSMUSG00000018899 (TF-TG) ENSMUSG00000005973" source="2190" target="2130" cy:directed="1"/>
      <edge id="21326" label="ENSMUSG00000018899 (TF-TG) ENSMUSG00000006494" source="2190" target="2129" cy:directed="1"/>
      <edge id="21325" label="ENSMUSG00000018899 (TF-TG) ENSMUSG00000006546" source="2190" target="1342" cy:directed="1"/>
      <edge id="21324" label="ENSMUSG00000018899 (TF-TG) ENSMUSG00000006930" source="2190" target="1530" cy:directed="1"/>
      <edge id="21323" label="ENSMUSG00000018899 (TF-TG) ENSMUSG00000009092" source="2190" target="1341" cy:directed="1"/>
      <edge id="21322" label="ENSMUSG00000018899 (TF-TG) ENSMUSG00000009108" source="2190" target="1340" cy:directed="1"/>
      <edge id="21321" label="ENSMUSG00000018899 (TF-TG) ENSMUSG00000009246" source="2190" target="1339" cy:directed="1"/>
      <edge id="21320" label="ENSMUSG00000018899 (TF-TG) ENSMUSG00000009292" source="2190" target="2124" cy:directed="1"/>
      <edge id="21319" label="ENSMUSG00000018899 (TF-TG) ENSMUSG00000010021" source="2190" target="1393" cy:directed="1"/>
      <edge id="21318" label="ENSMUSG00000018899 (TF-TG) ENSMUSG00000011148" source="2190" target="2121" cy:directed="1"/>
      <edge id="21317" label="ENSMUSG00000018899 (TF-TG) ENSMUSG00000012017" source="2190" target="1338" cy:directed="1"/>
      <edge id="21316" label="ENSMUSG00000018899 (TF-TG) ENSMUSG00000012443" source="2190" target="2120" cy:directed="1"/>
      <edge id="21315" label="ENSMUSG00000018899 (TF-TG) ENSMUSG00000013523" source="2190" target="1337" cy:directed="1"/>
      <edge id="21314" label="ENSMUSG00000018899 (TF-TG) ENSMUSG00000013698" source="2190" target="1336" cy:directed="1"/>
      <edge id="21313" label="ENSMUSG00000018899 (TF-TG) ENSMUSG00000013846" source="2190" target="1528" cy:directed="1"/>
      <edge id="21312" label="ENSMUSG00000018899 (TF-TG) ENSMUSG00000014164" source="2190" target="1660" cy:directed="1"/>
      <edge id="21311" label="ENSMUSG00000018899 (TF-TG) ENSMUSG00000014786" source="2190" target="2119" cy:directed="1"/>
      <edge id="21310" label="ENSMUSG00000018899 (TF-TG) ENSMUSG00000015396" source="2190" target="1335" cy:directed="1"/>
      <edge id="21309" label="ENSMUSG00000018899 (TF-TG) ENSMUSG00000015401" source="2190" target="1569" cy:directed="1"/>
      <edge id="21308" label="ENSMUSG00000018899 (TF-TG) ENSMUSG00000015962" source="2190" target="1334" cy:directed="1"/>
      <edge id="21307" label="ENSMUSG00000018899 (TF-TG) ENSMUSG00000016200" source="2190" target="1333" cy:directed="1"/>
      <edge id="21306" label="ENSMUSG00000018899 (TF-TG) ENSMUSG00000016526" source="2190" target="2116" cy:directed="1"/>
      <edge id="21305" label="ENSMUSG00000018899 (TF-TG) ENSMUSG00000017009" source="2190" target="1332" cy:directed="1"/>
      <edge id="21304" label="ENSMUSG00000018899 (TF-TG) ENSMUSG00000017057" source="2190" target="1331" cy:directed="1"/>
      <edge id="21303" label="ENSMUSG00000018899 (TF-TG) ENSMUSG00000017144" source="2190" target="1330" cy:directed="1"/>
      <edge id="21302" label="ENSMUSG00000018899 (TF-TG) ENSMUSG00000017466" source="2190" target="2113" cy:directed="1"/>
      <edge id="21301" label="ENSMUSG00000018899 (TF-TG) ENSMUSG00000017652" source="2190" target="1658" cy:directed="1"/>
      <edge id="21300" label="ENSMUSG00000018899 (TF-TG) ENSMUSG00000017716" source="2190" target="2110" cy:directed="1"/>
      <edge id="21299" label="ENSMUSG00000018899 (TF-TG) ENSMUSG00000017724" source="2190" target="1354" cy:directed="1"/>
      <edge id="21298" label="ENSMUSG00000018899 (TF-TG) ENSMUSG00000017861" source="2190" target="2192" cy:directed="1"/>
      <edge id="21297" label="ENSMUSG00000018899 (TF-TG) ENSMUSG00000017868" source="2190" target="1329" cy:directed="1"/>
      <edge id="21296" label="ENSMUSG00000018899 (TF-TG) ENSMUSG00000018740" source="2190" target="2108" cy:directed="1"/>
      <edge id="21295" label="ENSMUSG00000018899 (TF-TG) ENSMUSG00000018899" source="2190" target="2190" cy:directed="1"/>
      <edge id="21294" label="ENSMUSG00000018899 (TF-TG) ENSMUSG00000019066" source="2190" target="2107" cy:directed="1"/>
      <edge id="21293" label="ENSMUSG00000018899 (TF-TG) ENSMUSG00000019188" source="2190" target="1526" cy:directed="1"/>
      <edge id="21292" label="ENSMUSG00000018899 (TF-TG) ENSMUSG00000019302" source="2190" target="2106" cy:directed="1"/>
      <edge id="21291" label="ENSMUSG00000018899 (TF-TG) ENSMUSG00000019303" source="2190" target="2105" cy:directed="1"/>
      <edge id="21290" label="ENSMUSG00000018899 (TF-TG) ENSMUSG00000019564" source="2190" target="2104" cy:directed="1"/>
      <edge id="21289" label="ENSMUSG00000018899 (TF-TG) ENSMUSG00000019773" source="2190" target="2103" cy:directed="1"/>
      <edge id="21288" label="ENSMUSG00000018899 (TF-TG) ENSMUSG00000019796" source="2190" target="2102" cy:directed="1"/>
      <edge id="21287" label="ENSMUSG00000018899 (TF-TG) ENSMUSG00000019947" source="2190" target="2100" cy:directed="1"/>
      <edge id="21286" label="ENSMUSG00000018899 (TF-TG) ENSMUSG00000019982" source="2190" target="2099" cy:directed="1"/>
      <edge id="21285" label="ENSMUSG00000018899 (TF-TG) ENSMUSG00000019986" source="2190" target="2098" cy:directed="1"/>
      <edge id="21284" label="ENSMUSG00000018899 (TF-TG) ENSMUSG00000020034" source="2190" target="2097" cy:directed="1"/>
      <edge id="21283" label="ENSMUSG00000018899 (TF-TG) ENSMUSG00000020218" source="2190" target="1328" cy:directed="1"/>
      <edge id="21282" label="ENSMUSG00000018899 (TF-TG) ENSMUSG00000020472" source="2190" target="1557" cy:directed="1"/>
      <edge id="21281" label="ENSMUSG00000018899 (TF-TG) ENSMUSG00000020573" source="2190" target="2091" cy:directed="1"/>
      <edge id="21280" label="ENSMUSG00000018899 (TF-TG) ENSMUSG00000020581" source="2190" target="1327" cy:directed="1"/>
      <edge id="21279" label="ENSMUSG00000018899 (TF-TG) ENSMUSG00000020620" source="2190" target="1326" cy:directed="1"/>
      <edge id="21278" label="ENSMUSG00000018899 (TF-TG) ENSMUSG00000020641" source="2190" target="1519" cy:directed="1"/>
      <edge id="21277" label="ENSMUSG00000018899 (TF-TG) ENSMUSG00000020668" source="2190" target="2088" cy:directed="1"/>
      <edge id="21276" label="ENSMUSG00000018899 (TF-TG) ENSMUSG00000020741" source="2190" target="2086" cy:directed="1"/>
      <edge id="21275" label="ENSMUSG00000018899 (TF-TG) ENSMUSG00000020808" source="2190" target="1654" cy:directed="1"/>
      <edge id="21274" label="ENSMUSG00000018899 (TF-TG) ENSMUSG00000020846" source="2190" target="2083" cy:directed="1"/>
      <edge id="21273" label="ENSMUSG00000018899 (TF-TG) ENSMUSG00000020873" source="2190" target="2082" cy:directed="1"/>
      <edge id="21272" label="ENSMUSG00000018899 (TF-TG) ENSMUSG00000020894" source="2190" target="1556" cy:directed="1"/>
      <edge id="21271" label="ENSMUSG00000018899 (TF-TG) ENSMUSG00000020897" source="2190" target="2081" cy:directed="1"/>
      <edge id="21270" label="ENSMUSG00000018899 (TF-TG) ENSMUSG00000020901" source="2190" target="2080" cy:directed="1"/>
      <edge id="21269" label="ENSMUSG00000018899 (TF-TG) ENSMUSG00000020914" source="2190" target="2079" cy:directed="1"/>
      <edge id="21268" label="ENSMUSG00000018899 (TF-TG) ENSMUSG00000021061" source="2190" target="1390" cy:directed="1"/>
      <edge id="21267" label="ENSMUSG00000018899 (TF-TG) ENSMUSG00000021115" source="2190" target="2078" cy:directed="1"/>
      <edge id="21266" label="ENSMUSG00000018899 (TF-TG) ENSMUSG00000021221" source="2190" target="2077" cy:directed="1"/>
      <edge id="21265" label="ENSMUSG00000018899 (TF-TG) ENSMUSG00000021256" source="2190" target="1325" cy:directed="1"/>
      <edge id="21264" label="ENSMUSG00000018899 (TF-TG) ENSMUSG00000021281" source="2190" target="1324" cy:directed="1"/>
      <edge id="21263" label="ENSMUSG00000018899 (TF-TG) ENSMUSG00000021391" source="2190" target="2075" cy:directed="1"/>
      <edge id="21262" label="ENSMUSG00000018899 (TF-TG) ENSMUSG00000021396" source="2190" target="1323" cy:directed="1"/>
      <edge id="21261" label="ENSMUSG00000018899 (TF-TG) ENSMUSG00000021453" source="2190" target="2074" cy:directed="1"/>
      <edge id="21260" label="ENSMUSG00000018899 (TF-TG) ENSMUSG00000021587" source="2190" target="1322" cy:directed="1"/>
      <edge id="21259" label="ENSMUSG00000018899 (TF-TG) ENSMUSG00000021720" source="2190" target="1321" cy:directed="1"/>
      <edge id="21258" label="ENSMUSG00000018899 (TF-TG) ENSMUSG00000021725" source="2190" target="2073" cy:directed="1"/>
      <edge id="21257" label="ENSMUSG00000018899 (TF-TG) ENSMUSG00000021831" source="2190" target="2070" cy:directed="1"/>
      <edge id="21256" label="ENSMUSG00000018899 (TF-TG) ENSMUSG00000021876" source="2190" target="2069" cy:directed="1"/>
      <edge id="21255" label="ENSMUSG00000018899 (TF-TG) ENSMUSG00000022003" source="2190" target="2068" cy:directed="1"/>
      <edge id="21254" label="ENSMUSG00000018899 (TF-TG) ENSMUSG00000022021" source="2190" target="1517" cy:directed="1"/>
      <edge id="21253" label="ENSMUSG00000018899 (TF-TG) ENSMUSG00000022136" source="2190" target="2066" cy:directed="1"/>
      <edge id="21252" label="ENSMUSG00000018899 (TF-TG) ENSMUSG00000022148" source="2190" target="2065" cy:directed="1"/>
      <edge id="21251" label="ENSMUSG00000018899 (TF-TG) ENSMUSG00000022177" source="2190" target="2064" cy:directed="1"/>
      <edge id="21250" label="ENSMUSG00000018899 (TF-TG) ENSMUSG00000022208" source="2190" target="1320" cy:directed="1"/>
      <edge id="21249" label="ENSMUSG00000018899 (TF-TG) ENSMUSG00000022253" source="2190" target="2063" cy:directed="1"/>
      <edge id="21248" label="ENSMUSG00000018899 (TF-TG) ENSMUSG00000022346" source="2190" target="2188" cy:directed="1"/>
      <edge id="21247" label="ENSMUSG00000018899 (TF-TG) ENSMUSG00000022422" source="2190" target="1388" cy:directed="1"/>
      <edge id="21246" label="ENSMUSG00000018899 (TF-TG) ENSMUSG00000022436" source="2190" target="2060" cy:directed="1"/>
      <edge id="21245" label="ENSMUSG00000018899 (TF-TG) ENSMUSG00000022479" source="2190" target="2185" cy:directed="1"/>
      <edge id="21244" label="ENSMUSG00000018899 (TF-TG) ENSMUSG00000022489" source="2190" target="1387" cy:directed="1"/>
      <edge id="21243" label="ENSMUSG00000018899 (TF-TG) ENSMUSG00000022673" source="2190" target="2057" cy:directed="1"/>
      <edge id="21242" label="ENSMUSG00000018899 (TF-TG) ENSMUSG00000022748" source="2190" target="2056" cy:directed="1"/>
      <edge id="21241" label="ENSMUSG00000018899 (TF-TG) ENSMUSG00000022864" source="2190" target="2054" cy:directed="1"/>
      <edge id="21240" label="ENSMUSG00000018899 (TF-TG) ENSMUSG00000022881" source="2190" target="1514" cy:directed="1"/>
      <edge id="21239" label="ENSMUSG00000018899 (TF-TG) ENSMUSG00000022900" source="2190" target="2053" cy:directed="1"/>
      <edge id="21238" label="ENSMUSG00000018899 (TF-TG) ENSMUSG00000022912" source="2190" target="2052" cy:directed="1"/>
      <edge id="21237" label="ENSMUSG00000018899 (TF-TG) ENSMUSG00000022945" source="2190" target="2051" cy:directed="1"/>
      <edge id="21236" label="ENSMUSG00000018899 (TF-TG) ENSMUSG00000023004" source="2190" target="2050" cy:directed="1"/>
      <edge id="21235" label="ENSMUSG00000018899 (TF-TG) ENSMUSG00000023032" source="2190" target="2045" cy:directed="1"/>
      <edge id="21234" label="ENSMUSG00000018899 (TF-TG) ENSMUSG00000023050" source="2190" target="1319" cy:directed="1"/>
      <edge id="21233" label="ENSMUSG00000018899 (TF-TG) ENSMUSG00000023224" source="2190" target="2044" cy:directed="1"/>
      <edge id="21232" label="ENSMUSG00000018899 (TF-TG) ENSMUSG00000023473" source="2190" target="1318" cy:directed="1"/>
      <edge id="21231" label="ENSMUSG00000018899 (TF-TG) ENSMUSG00000023827" source="2190" target="1317" cy:directed="1"/>
      <edge id="21230" label="ENSMUSG00000018899 (TF-TG) ENSMUSG00000023908" source="2190" target="1316" cy:directed="1"/>
      <edge id="21229" label="ENSMUSG00000018899 (TF-TG) ENSMUSG00000023940" source="2190" target="2041" cy:directed="1"/>
      <edge id="21228" label="ENSMUSG00000018899 (TF-TG) ENSMUSG00000024030" source="2190" target="1511" cy:directed="1"/>
      <edge id="21227" label="ENSMUSG00000018899 (TF-TG) ENSMUSG00000024033" source="2190" target="1646" cy:directed="1"/>
      <edge id="21226" label="ENSMUSG00000018899 (TF-TG) ENSMUSG00000024063" source="2190" target="2040" cy:directed="1"/>
      <edge id="21225" label="ENSMUSG00000018899 (TF-TG) ENSMUSG00000024301" source="2190" target="2036" cy:directed="1"/>
      <edge id="21224" label="ENSMUSG00000018899 (TF-TG) ENSMUSG00000024431" source="2190" target="2182" cy:directed="1"/>
      <edge id="21223" label="ENSMUSG00000018899 (TF-TG) ENSMUSG00000024516" source="2190" target="2035" cy:directed="1"/>
      <edge id="21222" label="ENSMUSG00000018899 (TF-TG) ENSMUSG00000024542" source="2190" target="2033" cy:directed="1"/>
      <edge id="21221" label="ENSMUSG00000018899 (TF-TG) ENSMUSG00000024590" source="2190" target="2178" cy:directed="1"/>
      <edge id="21220" label="ENSMUSG00000018899 (TF-TG) ENSMUSG00000024613" source="2190" target="1315" cy:directed="1"/>
      <edge id="21219" label="ENSMUSG00000018899 (TF-TG) ENSMUSG00000024621" source="2190" target="1314" cy:directed="1"/>
      <edge id="21218" label="ENSMUSG00000018899 (TF-TG) ENSMUSG00000024644" source="2190" target="2030" cy:directed="1"/>
      <edge id="21217" label="ENSMUSG00000018899 (TF-TG) ENSMUSG00000024646" source="2190" target="1313" cy:directed="1"/>
      <edge id="21216" label="ENSMUSG00000018899 (TF-TG) ENSMUSG00000024743" source="2190" target="1383" cy:directed="1"/>
      <edge id="21215" label="ENSMUSG00000018899 (TF-TG) ENSMUSG00000024774" source="2190" target="2029" cy:directed="1"/>
      <edge id="21214" label="ENSMUSG00000018899 (TF-TG) ENSMUSG00000024777" source="2190" target="2028" cy:directed="1"/>
      <edge id="21213" label="ENSMUSG00000018899 (TF-TG) ENSMUSG00000024795" source="2190" target="2027" cy:directed="1"/>
      <edge id="21212" label="ENSMUSG00000018899 (TF-TG) ENSMUSG00000024807" source="2190" target="1509" cy:directed="1"/>
      <edge id="21211" label="ENSMUSG00000018899 (TF-TG) ENSMUSG00000024810" source="2190" target="1312" cy:directed="1"/>
      <edge id="21210" label="ENSMUSG00000018899 (TF-TG) ENSMUSG00000024901" source="2190" target="1311" cy:directed="1"/>
      <edge id="21209" label="ENSMUSG00000018899 (TF-TG) ENSMUSG00000024989" source="2190" target="2023" cy:directed="1"/>
      <edge id="21208" label="ENSMUSG00000018899 (TF-TG) ENSMUSG00000025019" source="2190" target="2021" cy:directed="1"/>
      <edge id="21207" label="ENSMUSG00000018899 (TF-TG) ENSMUSG00000025059" source="2190" target="1310" cy:directed="1"/>
      <edge id="21206" label="ENSMUSG00000018899 (TF-TG) ENSMUSG00000025064" source="2190" target="1644" cy:directed="1"/>
      <edge id="21205" label="ENSMUSG00000018899 (TF-TG) ENSMUSG00000025492" source="2190" target="1309" cy:directed="1"/>
      <edge id="21204" label="ENSMUSG00000018899 (TF-TG) ENSMUSG00000025507" source="2190" target="1308" cy:directed="1"/>
      <edge id="21203" label="ENSMUSG00000018899 (TF-TG) ENSMUSG00000025584" source="2190" target="2016" cy:directed="1"/>
      <edge id="21202" label="ENSMUSG00000018899 (TF-TG) ENSMUSG00000025758" source="2190" target="2015" cy:directed="1"/>
      <edge id="21201" label="ENSMUSG00000018899 (TF-TG) ENSMUSG00000025810" source="2190" target="1307" cy:directed="1"/>
      <edge id="21200" label="ENSMUSG00000018899 (TF-TG) ENSMUSG00000025912" source="2190" target="2014" cy:directed="1"/>
      <edge id="21199" label="ENSMUSG00000018899 (TF-TG) ENSMUSG00000025969" source="2190" target="1566" cy:directed="1"/>
      <edge id="21198" label="ENSMUSG00000018899 (TF-TG) ENSMUSG00000026068" source="2190" target="1306" cy:directed="1"/>
      <edge id="21197" label="ENSMUSG00000018899 (TF-TG) ENSMUSG00000026072" source="2190" target="1305" cy:directed="1"/>
      <edge id="21196" label="ENSMUSG00000018899 (TF-TG) ENSMUSG00000026102" source="2190" target="1304" cy:directed="1"/>
      <edge id="21195" label="ENSMUSG00000018899 (TF-TG) ENSMUSG00000026196" source="2190" target="2013" cy:directed="1"/>
      <edge id="21194" label="ENSMUSG00000018899 (TF-TG) ENSMUSG00000026281" source="2190" target="2012" cy:directed="1"/>
      <edge id="21193" label="ENSMUSG00000018899 (TF-TG) ENSMUSG00000026360" source="2190" target="2011" cy:directed="1"/>
      <edge id="21192" label="ENSMUSG00000018899 (TF-TG) ENSMUSG00000026429" source="2190" target="2010" cy:directed="1"/>
      <edge id="21191" label="ENSMUSG00000018899 (TF-TG) ENSMUSG00000026430" source="2190" target="1500" cy:directed="1"/>
      <edge id="21190" label="ENSMUSG00000018899 (TF-TG) ENSMUSG00000026480" source="2190" target="1499" cy:directed="1"/>
      <edge id="21189" label="ENSMUSG00000018899 (TF-TG) ENSMUSG00000026504" source="2190" target="2009" cy:directed="1"/>
      <edge id="21188" label="ENSMUSG00000018899 (TF-TG) ENSMUSG00000026509" source="2190" target="2008" cy:directed="1"/>
      <edge id="21187" label="ENSMUSG00000018899 (TF-TG) ENSMUSG00000026646" source="2190" target="1303" cy:directed="1"/>
      <edge id="21186" label="ENSMUSG00000018899 (TF-TG) ENSMUSG00000026657" source="2190" target="1302" cy:directed="1"/>
      <edge id="21185" label="ENSMUSG00000018899 (TF-TG) ENSMUSG00000026669" source="2190" target="1498" cy:directed="1"/>
      <edge id="21184" label="ENSMUSG00000018899 (TF-TG) ENSMUSG00000026683" source="2190" target="2005" cy:directed="1"/>
      <edge id="21183" label="ENSMUSG00000018899 (TF-TG) ENSMUSG00000026700" source="2190" target="1301" cy:directed="1"/>
      <edge id="21182" label="ENSMUSG00000018899 (TF-TG) ENSMUSG00000026728" source="2190" target="2004" cy:directed="1"/>
      <edge id="21181" label="ENSMUSG00000018899 (TF-TG) ENSMUSG00000026764" source="2190" target="1639" cy:directed="1"/>
      <edge id="21180" label="ENSMUSG00000018899 (TF-TG) ENSMUSG00000026786" source="2190" target="2001" cy:directed="1"/>
      <edge id="21179" label="ENSMUSG00000018899 (TF-TG) ENSMUSG00000026815" source="2190" target="1300" cy:directed="1"/>
      <edge id="21178" label="ENSMUSG00000018899 (TF-TG) ENSMUSG00000026864" source="2190" target="1497" cy:directed="1"/>
      <edge id="21177" label="ENSMUSG00000018899 (TF-TG) ENSMUSG00000026879" source="2190" target="2000" cy:directed="1"/>
      <edge id="21176" label="ENSMUSG00000018899 (TF-TG) ENSMUSG00000026955" source="2190" target="1299" cy:directed="1"/>
      <edge id="21175" label="ENSMUSG00000018899 (TF-TG) ENSMUSG00000027006" source="2190" target="1998" cy:directed="1"/>
      <edge id="21174" label="ENSMUSG00000018899 (TF-TG) ENSMUSG00000027009" source="2190" target="1997" cy:directed="1"/>
      <edge id="21173" label="ENSMUSG00000018899 (TF-TG) ENSMUSG00000027273" source="2190" target="1636" cy:directed="1"/>
      <edge id="21172" label="ENSMUSG00000018899 (TF-TG) ENSMUSG00000027326" source="2190" target="1992" cy:directed="1"/>
      <edge id="21171" label="ENSMUSG00000018899 (TF-TG) ENSMUSG00000027375" source="2190" target="1298" cy:directed="1"/>
      <edge id="21170" label="ENSMUSG00000018899 (TF-TG) ENSMUSG00000027420" source="2190" target="1493" cy:directed="1"/>
      <edge id="21169" label="ENSMUSG00000018899 (TF-TG) ENSMUSG00000027454" source="2190" target="1991" cy:directed="1"/>
      <edge id="21168" label="ENSMUSG00000018899 (TF-TG) ENSMUSG00000027456" source="2190" target="1491" cy:directed="1"/>
      <edge id="21167" label="ENSMUSG00000018899 (TF-TG) ENSMUSG00000027490" source="2190" target="2186" cy:directed="1"/>
      <edge id="21166" label="ENSMUSG00000018899 (TF-TG) ENSMUSG00000027499" source="2190" target="1490" cy:directed="1"/>
      <edge id="21165" label="ENSMUSG00000018899 (TF-TG) ENSMUSG00000027514" source="2190" target="1988" cy:directed="1"/>
      <edge id="21164" label="ENSMUSG00000018899 (TF-TG) ENSMUSG00000027641" source="2190" target="2166" cy:directed="1"/>
      <edge id="21163" label="ENSMUSG00000018899 (TF-TG) ENSMUSG00000027750" source="2190" target="1297" cy:directed="1"/>
      <edge id="21162" label="ENSMUSG00000018899 (TF-TG) ENSMUSG00000027763" source="2190" target="1983" cy:directed="1"/>
      <edge id="21161" label="ENSMUSG00000018899 (TF-TG) ENSMUSG00000027878" source="2190" target="1981" cy:directed="1"/>
      <edge id="21160" label="ENSMUSG00000018899 (TF-TG) ENSMUSG00000027890" source="2190" target="1296" cy:directed="1"/>
      <edge id="21159" label="ENSMUSG00000018899 (TF-TG) ENSMUSG00000027931" source="2190" target="1295" cy:directed="1"/>
      <edge id="21158" label="ENSMUSG00000018899 (TF-TG) ENSMUSG00000027938" source="2190" target="1294" cy:directed="1"/>
      <edge id="21157" label="ENSMUSG00000018899 (TF-TG) ENSMUSG00000028057" source="2190" target="1293" cy:directed="1"/>
      <edge id="21156" label="ENSMUSG00000018899 (TF-TG) ENSMUSG00000028076" source="2190" target="1292" cy:directed="1"/>
      <edge id="21155" label="ENSMUSG00000018899 (TF-TG) ENSMUSG00000028282" source="2190" target="1978" cy:directed="1"/>
      <edge id="21154" label="ENSMUSG00000018899 (TF-TG) ENSMUSG00000028312" source="2190" target="1977" cy:directed="1"/>
      <edge id="21153" label="ENSMUSG00000018899 (TF-TG) ENSMUSG00000028341" source="2190" target="1976" cy:directed="1"/>
      <edge id="21152" label="ENSMUSG00000018899 (TF-TG) ENSMUSG00000028403" source="2190" target="1291" cy:directed="1"/>
      <edge id="21151" label="ENSMUSG00000018899 (TF-TG) ENSMUSG00000028551" source="2190" target="1290" cy:directed="1"/>
      <edge id="21150" label="ENSMUSG00000018899 (TF-TG) ENSMUSG00000028560" source="2190" target="1974" cy:directed="1"/>
      <edge id="21149" label="ENSMUSG00000018899 (TF-TG) ENSMUSG00000028573" source="2190" target="1488" cy:directed="1"/>
      <edge id="21148" label="ENSMUSG00000018899 (TF-TG) ENSMUSG00000028614" source="2190" target="1971" cy:directed="1"/>
      <edge id="21147" label="ENSMUSG00000018899 (TF-TG) ENSMUSG00000028718" source="2190" target="1964" cy:directed="1"/>
      <edge id="21146" label="ENSMUSG00000018899 (TF-TG) ENSMUSG00000028749" source="2190" target="1289" cy:directed="1"/>
      <edge id="21145" label="ENSMUSG00000018899 (TF-TG) ENSMUSG00000028832" source="2190" target="1963" cy:directed="1"/>
      <edge id="21144" label="ENSMUSG00000018899 (TF-TG) ENSMUSG00000028874" source="2190" target="1962" cy:directed="1"/>
      <edge id="21143" label="ENSMUSG00000018899 (TF-TG) ENSMUSG00000028884" source="2190" target="2164" cy:directed="1"/>
      <edge id="21142" label="ENSMUSG00000018899 (TF-TG) ENSMUSG00000028949" source="2190" target="1484" cy:directed="1"/>
      <edge id="21141" label="ENSMUSG00000018899 (TF-TG) ENSMUSG00000028972" source="2190" target="1288" cy:directed="1"/>
      <edge id="21140" label="ENSMUSG00000018899 (TF-TG) ENSMUSG00000029154" source="2190" target="1287" cy:directed="1"/>
      <edge id="21139" label="ENSMUSG00000018899 (TF-TG) ENSMUSG00000029163" source="2190" target="1960" cy:directed="1"/>
      <edge id="21138" label="ENSMUSG00000018899 (TF-TG) ENSMUSG00000029177" source="2190" target="1482" cy:directed="1"/>
      <edge id="21137" label="ENSMUSG00000018899 (TF-TG) ENSMUSG00000029185" source="2190" target="1958" cy:directed="1"/>
      <edge id="21136" label="ENSMUSG00000018899 (TF-TG) ENSMUSG00000029312" source="2190" target="1957" cy:directed="1"/>
      <edge id="21135" label="ENSMUSG00000018899 (TF-TG) ENSMUSG00000029343" source="2190" target="1956" cy:directed="1"/>
      <edge id="21134" label="ENSMUSG00000018899 (TF-TG) ENSMUSG00000029370" source="2190" target="1286" cy:directed="1"/>
      <edge id="21133" label="ENSMUSG00000018899 (TF-TG) ENSMUSG00000029470" source="2190" target="1953" cy:directed="1"/>
      <edge id="21132" label="ENSMUSG00000018899 (TF-TG) ENSMUSG00000029490" source="2190" target="1481" cy:directed="1"/>
      <edge id="21131" label="ENSMUSG00000018899 (TF-TG) ENSMUSG00000029561" source="2190" target="1285" cy:directed="1"/>
      <edge id="21130" label="ENSMUSG00000018899 (TF-TG) ENSMUSG00000029650" source="2190" target="1949" cy:directed="1"/>
      <edge id="21129" label="ENSMUSG00000018899 (TF-TG) ENSMUSG00000029706" source="2190" target="1284" cy:directed="1"/>
      <edge id="21128" label="ENSMUSG00000018899 (TF-TG) ENSMUSG00000029919" source="2190" target="1283" cy:directed="1"/>
      <edge id="21127" label="ENSMUSG00000018899 (TF-TG) ENSMUSG00000030029" source="2190" target="1944" cy:directed="1"/>
      <edge id="21126" label="ENSMUSG00000018899 (TF-TG) ENSMUSG00000030107" source="2190" target="1943" cy:directed="1"/>
      <edge id="21125" label="ENSMUSG00000018899 (TF-TG) ENSMUSG00000030199" source="2190" target="1942" cy:directed="1"/>
      <edge id="21124" label="ENSMUSG00000018899 (TF-TG) ENSMUSG00000030263" source="2190" target="1282" cy:directed="1"/>
      <edge id="21123" label="ENSMUSG00000018899 (TF-TG) ENSMUSG00000030275" source="2190" target="1941" cy:directed="1"/>
      <edge id="21122" label="ENSMUSG00000018899 (TF-TG) ENSMUSG00000030329" source="2190" target="1281" cy:directed="1"/>
      <edge id="21121" label="ENSMUSG00000018899 (TF-TG) ENSMUSG00000030359" source="2190" target="1280" cy:directed="1"/>
      <edge id="21120" label="ENSMUSG00000018899 (TF-TG) ENSMUSG00000030659" source="2190" target="1479" cy:directed="1"/>
      <edge id="21119" label="ENSMUSG00000018899 (TF-TG) ENSMUSG00000030717" source="2190" target="1279" cy:directed="1"/>
      <edge id="21118" label="ENSMUSG00000018899 (TF-TG) ENSMUSG00000031004" source="2190" target="1934" cy:directed="1"/>
      <edge id="21117" label="ENSMUSG00000018899 (TF-TG) ENSMUSG00000031173" source="2190" target="1278" cy:directed="1"/>
      <edge id="21116" label="ENSMUSG00000018899 (TF-TG) ENSMUSG00000031403" source="2190" target="1277" cy:directed="1"/>
      <edge id="21115" label="ENSMUSG00000018899 (TF-TG) ENSMUSG00000031451" source="2190" target="1276" cy:directed="1"/>
      <edge id="21114" label="ENSMUSG00000018899 (TF-TG) ENSMUSG00000031453" source="2190" target="1931" cy:directed="1"/>
      <edge id="21113" label="ENSMUSG00000018899 (TF-TG) ENSMUSG00000031586" source="2190" target="1378" cy:directed="1"/>
      <edge id="21112" label="ENSMUSG00000018899 (TF-TG) ENSMUSG00000031629" source="2190" target="1929" cy:directed="1"/>
      <edge id="21111" label="ENSMUSG00000018899 (TF-TG) ENSMUSG00000031668" source="2190" target="1928" cy:directed="1"/>
      <edge id="21110" label="ENSMUSG00000018899 (TF-TG) ENSMUSG00000031730" source="2190" target="1474" cy:directed="1"/>
      <edge id="21109" label="ENSMUSG00000018899 (TF-TG) ENSMUSG00000031756" source="2190" target="1377" cy:directed="1"/>
      <edge id="21108" label="ENSMUSG00000018899 (TF-TG) ENSMUSG00000031757" source="2190" target="1630" cy:directed="1"/>
      <edge id="21107" label="ENSMUSG00000018899 (TF-TG) ENSMUSG00000031788" source="2190" target="1628" cy:directed="1"/>
      <edge id="21106" label="ENSMUSG00000018899 (TF-TG) ENSMUSG00000031903" source="2190" target="1926" cy:directed="1"/>
      <edge id="21105" label="ENSMUSG00000018899 (TF-TG) ENSMUSG00000032076" source="2190" target="1626" cy:directed="1"/>
      <edge id="21104" label="ENSMUSG00000018899 (TF-TG) ENSMUSG00000032120" source="2190" target="1472" cy:directed="1"/>
      <edge id="21103" label="ENSMUSG00000018899 (TF-TG) ENSMUSG00000032218" source="2190" target="1923" cy:directed="1"/>
      <edge id="21102" label="ENSMUSG00000018899 (TF-TG) ENSMUSG00000032549" source="2190" target="1275" cy:directed="1"/>
      <edge id="21101" label="ENSMUSG00000018899 (TF-TG) ENSMUSG00000032640" source="2190" target="1913" cy:directed="1"/>
      <edge id="21100" label="ENSMUSG00000018899 (TF-TG) ENSMUSG00000032656" source="2190" target="1912" cy:directed="1"/>
      <edge id="21099" label="ENSMUSG00000018899 (TF-TG) ENSMUSG00000032661" source="2190" target="1274" cy:directed="1"/>
      <edge id="21098" label="ENSMUSG00000018899 (TF-TG) ENSMUSG00000032773" source="2190" target="1374" cy:directed="1"/>
      <edge id="21097" label="ENSMUSG00000018899 (TF-TG) ENSMUSG00000032839" source="2190" target="1273" cy:directed="1"/>
      <edge id="21096" label="ENSMUSG00000018899 (TF-TG) ENSMUSG00000032932" source="2190" target="1907" cy:directed="1"/>
      <edge id="21095" label="ENSMUSG00000018899 (TF-TG) ENSMUSG00000032965" source="2190" target="1906" cy:directed="1"/>
      <edge id="21094" label="ENSMUSG00000018899 (TF-TG) ENSMUSG00000032978" source="2190" target="1552" cy:directed="1"/>
      <edge id="21093" label="ENSMUSG00000018899 (TF-TG) ENSMUSG00000033287" source="2190" target="1904" cy:directed="1"/>
      <edge id="21092" label="ENSMUSG00000018899 (TF-TG) ENSMUSG00000033530" source="2190" target="1903" cy:directed="1"/>
      <edge id="21091" label="ENSMUSG00000018899 (TF-TG) ENSMUSG00000033684" source="2190" target="1272" cy:directed="1"/>
      <edge id="21090" label="ENSMUSG00000018899 (TF-TG) ENSMUSG00000033752" source="2190" target="1466" cy:directed="1"/>
      <edge id="21089" label="ENSMUSG00000018899 (TF-TG) ENSMUSG00000033970" source="2190" target="1465" cy:directed="1"/>
      <edge id="21088" label="ENSMUSG00000018899 (TF-TG) ENSMUSG00000034116" source="2190" target="1899" cy:directed="1"/>
      <edge id="21087" label="ENSMUSG00000018899 (TF-TG) ENSMUSG00000034226" source="2190" target="1896" cy:directed="1"/>
      <edge id="21086" label="ENSMUSG00000018899 (TF-TG) ENSMUSG00000034265" source="2190" target="1895" cy:directed="1"/>
      <edge id="21085" label="ENSMUSG00000018899 (TF-TG) ENSMUSG00000034317" source="2190" target="1894" cy:directed="1"/>
      <edge id="21084" label="ENSMUSG00000018899 (TF-TG) ENSMUSG00000034349" source="2190" target="1271" cy:directed="1"/>
      <edge id="21083" label="ENSMUSG00000018899 (TF-TG) ENSMUSG00000034353" source="2190" target="1464" cy:directed="1"/>
      <edge id="21082" label="ENSMUSG00000018899 (TF-TG) ENSMUSG00000034579" source="2190" target="1618" cy:directed="1"/>
      <edge id="21081" label="ENSMUSG00000018899 (TF-TG) ENSMUSG00000034768" source="2190" target="1463" cy:directed="1"/>
      <edge id="21080" label="ENSMUSG00000018899 (TF-TG) ENSMUSG00000034773" source="2190" target="1617" cy:directed="1"/>
      <edge id="21079" label="ENSMUSG00000018899 (TF-TG) ENSMUSG00000034855" source="2190" target="1270" cy:directed="1"/>
      <edge id="21078" label="ENSMUSG00000018899 (TF-TG) ENSMUSG00000034858" source="2190" target="1890" cy:directed="1"/>
      <edge id="21077" label="ENSMUSG00000018899 (TF-TG) ENSMUSG00000034883" source="2190" target="1889" cy:directed="1"/>
      <edge id="21076" label="ENSMUSG00000018899 (TF-TG) ENSMUSG00000035158" source="2190" target="2157" cy:directed="1"/>
      <edge id="21075" label="ENSMUSG00000018899 (TF-TG) ENSMUSG00000035164" source="2190" target="1269" cy:directed="1"/>
      <edge id="21074" label="ENSMUSG00000018899 (TF-TG) ENSMUSG00000035273" source="2190" target="1888" cy:directed="1"/>
      <edge id="21073" label="ENSMUSG00000018899 (TF-TG) ENSMUSG00000035279" source="2190" target="1614" cy:directed="1"/>
      <edge id="21072" label="ENSMUSG00000018899 (TF-TG) ENSMUSG00000035561" source="2190" target="1268" cy:directed="1"/>
      <edge id="21071" label="ENSMUSG00000018899 (TF-TG) ENSMUSG00000035692" source="2190" target="1459" cy:directed="1"/>
      <edge id="21070" label="ENSMUSG00000018899 (TF-TG) ENSMUSG00000035901" source="2190" target="1883" cy:directed="1"/>
      <edge id="21069" label="ENSMUSG00000018899 (TF-TG) ENSMUSG00000036036" source="2190" target="1267" cy:directed="1"/>
      <edge id="21068" label="ENSMUSG00000018899 (TF-TG) ENSMUSG00000036181" source="2190" target="1881" cy:directed="1"/>
      <edge id="21067" label="ENSMUSG00000018899 (TF-TG) ENSMUSG00000036223" source="2190" target="1455" cy:directed="1"/>
      <edge id="21066" label="ENSMUSG00000018899 (TF-TG) ENSMUSG00000036526" source="2190" target="1877" cy:directed="1"/>
      <edge id="21065" label="ENSMUSG00000018899 (TF-TG) ENSMUSG00000036745" source="2190" target="1266" cy:directed="1"/>
      <edge id="21064" label="ENSMUSG00000018899 (TF-TG) ENSMUSG00000036777" source="2190" target="1265" cy:directed="1"/>
      <edge id="21063" label="ENSMUSG00000018899 (TF-TG) ENSMUSG00000036887" source="2190" target="1264" cy:directed="1"/>
      <edge id="21062" label="ENSMUSG00000018899 (TF-TG) ENSMUSG00000037032" source="2190" target="1263" cy:directed="1"/>
      <edge id="21061" label="ENSMUSG00000018899 (TF-TG) ENSMUSG00000037306" source="2190" target="1871" cy:directed="1"/>
      <edge id="21060" label="ENSMUSG00000018899 (TF-TG) ENSMUSG00000037419" source="2190" target="1262" cy:directed="1"/>
      <edge id="21059" label="ENSMUSG00000018899 (TF-TG) ENSMUSG00000037447" source="2190" target="1869" cy:directed="1"/>
      <edge id="21058" label="ENSMUSG00000018899 (TF-TG) ENSMUSG00000037579" source="2190" target="1868" cy:directed="1"/>
      <edge id="21057" label="ENSMUSG00000018899 (TF-TG) ENSMUSG00000037643" source="2190" target="1865" cy:directed="1"/>
      <edge id="21056" label="ENSMUSG00000018899 (TF-TG) ENSMUSG00000037664" source="2190" target="1608" cy:directed="1"/>
      <edge id="21055" label="ENSMUSG00000018899 (TF-TG) ENSMUSG00000037868" source="2190" target="1261" cy:directed="1"/>
      <edge id="21054" label="ENSMUSG00000018899 (TF-TG) ENSMUSG00000037991" source="2190" target="1260" cy:directed="1"/>
      <edge id="21053" label="ENSMUSG00000018899 (TF-TG) ENSMUSG00000038005" source="2190" target="1862" cy:directed="1"/>
      <edge id="21052" label="ENSMUSG00000018899 (TF-TG) ENSMUSG00000038039" source="2190" target="1861" cy:directed="1"/>
      <edge id="21051" label="ENSMUSG00000018899 (TF-TG) ENSMUSG00000038175" source="2190" target="1859" cy:directed="1"/>
      <edge id="21050" label="ENSMUSG00000018899 (TF-TG) ENSMUSG00000038180" source="2190" target="1259" cy:directed="1"/>
      <edge id="21049" label="ENSMUSG00000018899 (TF-TG) ENSMUSG00000038379" source="2190" target="1855" cy:directed="1"/>
      <edge id="21048" label="ENSMUSG00000018899 (TF-TG) ENSMUSG00000038451" source="2190" target="1606" cy:directed="1"/>
      <edge id="21047" label="ENSMUSG00000018899 (TF-TG) ENSMUSG00000038456" source="2190" target="1605" cy:directed="1"/>
      <edge id="21046" label="ENSMUSG00000018899 (TF-TG) ENSMUSG00000038463" source="2190" target="1258" cy:directed="1"/>
      <edge id="21045" label="ENSMUSG00000018899 (TF-TG) ENSMUSG00000038486" source="2190" target="1257" cy:directed="1"/>
      <edge id="21044" label="ENSMUSG00000018899 (TF-TG) ENSMUSG00000038578" source="2190" target="1853" cy:directed="1"/>
      <edge id="21043" label="ENSMUSG00000018899 (TF-TG) ENSMUSG00000038580" source="2190" target="1256" cy:directed="1"/>
      <edge id="21042" label="ENSMUSG00000018899 (TF-TG) ENSMUSG00000038599" source="2190" target="1255" cy:directed="1"/>
      <edge id="21041" label="ENSMUSG00000018899 (TF-TG) ENSMUSG00000038745" source="2190" target="1254" cy:directed="1"/>
      <edge id="21040" label="ENSMUSG00000018899 (TF-TG) ENSMUSG00000038777" source="2190" target="1253" cy:directed="1"/>
      <edge id="21039" label="ENSMUSG00000018899 (TF-TG) ENSMUSG00000038836" source="2190" target="1851" cy:directed="1"/>
      <edge id="21038" label="ENSMUSG00000018899 (TF-TG) ENSMUSG00000039126" source="2190" target="1847" cy:directed="1"/>
      <edge id="21037" label="ENSMUSG00000018899 (TF-TG) ENSMUSG00000039158" source="2190" target="1844" cy:directed="1"/>
      <edge id="21036" label="ENSMUSG00000018899 (TF-TG) ENSMUSG00000039270" source="2190" target="1841" cy:directed="1"/>
      <edge id="21035" label="ENSMUSG00000018899 (TF-TG) ENSMUSG00000039621" source="2190" target="1838" cy:directed="1"/>
      <edge id="21034" label="ENSMUSG00000018899 (TF-TG) ENSMUSG00000039676" source="2190" target="1252" cy:directed="1"/>
      <edge id="21033" label="ENSMUSG00000018899 (TF-TG) ENSMUSG00000039934" source="2190" target="1602" cy:directed="1"/>
      <edge id="21032" label="ENSMUSG00000018899 (TF-TG) ENSMUSG00000039943" source="2190" target="1448" cy:directed="1"/>
      <edge id="21031" label="ENSMUSG00000018899 (TF-TG) ENSMUSG00000039982" source="2190" target="1834" cy:directed="1"/>
      <edge id="21030" label="ENSMUSG00000018899 (TF-TG) ENSMUSG00000040084" source="2190" target="1832" cy:directed="1"/>
      <edge id="21029" label="ENSMUSG00000018899 (TF-TG) ENSMUSG00000040339" source="2190" target="1829" cy:directed="1"/>
      <edge id="21028" label="ENSMUSG00000018899 (TF-TG) ENSMUSG00000040380" source="2190" target="1251" cy:directed="1"/>
      <edge id="21027" label="ENSMUSG00000018899 (TF-TG) ENSMUSG00000040528" source="2190" target="1250" cy:directed="1"/>
      <edge id="21026" label="ENSMUSG00000018899 (TF-TG) ENSMUSG00000040624" source="2190" target="1249" cy:directed="1"/>
      <edge id="21025" label="ENSMUSG00000018899 (TF-TG) ENSMUSG00000040710" source="2190" target="1825" cy:directed="1"/>
      <edge id="21024" label="ENSMUSG00000018899 (TF-TG) ENSMUSG00000040717" source="2190" target="1248" cy:directed="1"/>
      <edge id="21023" label="ENSMUSG00000018899 (TF-TG) ENSMUSG00000040723" source="2190" target="1824" cy:directed="1"/>
      <edge id="21022" label="ENSMUSG00000018899 (TF-TG) ENSMUSG00000041064" source="2190" target="1820" cy:directed="1"/>
      <edge id="21021" label="ENSMUSG00000018899 (TF-TG) ENSMUSG00000041075" source="2190" target="1819" cy:directed="1"/>
      <edge id="21020" label="ENSMUSG00000018899 (TF-TG) ENSMUSG00000041202" source="2190" target="1247" cy:directed="1"/>
      <edge id="21019" label="ENSMUSG00000018899 (TF-TG) ENSMUSG00000041293" source="2190" target="1817" cy:directed="1"/>
      <edge id="21018" label="ENSMUSG00000018899 (TF-TG) ENSMUSG00000041390" source="2190" target="1444" cy:directed="1"/>
      <edge id="21017" label="ENSMUSG00000018899 (TF-TG) ENSMUSG00000041439" source="2190" target="1246" cy:directed="1"/>
      <edge id="21016" label="ENSMUSG00000018899 (TF-TG) ENSMUSG00000041836" source="2190" target="1563" cy:directed="1"/>
      <edge id="21015" label="ENSMUSG00000018899 (TF-TG) ENSMUSG00000041859" source="2190" target="1245" cy:directed="1"/>
      <edge id="21014" label="ENSMUSG00000018899 (TF-TG) ENSMUSG00000042109" source="2190" target="1244" cy:directed="1"/>
      <edge id="21013" label="ENSMUSG00000018899 (TF-TG) ENSMUSG00000042404" source="2190" target="1549" cy:directed="1"/>
      <edge id="21012" label="ENSMUSG00000018899 (TF-TG) ENSMUSG00000042489" source="2190" target="1812" cy:directed="1"/>
      <edge id="21011" label="ENSMUSG00000018899 (TF-TG) ENSMUSG00000042564" source="2190" target="1243" cy:directed="1"/>
      <edge id="21010" label="ENSMUSG00000018899 (TF-TG) ENSMUSG00000042684" source="2190" target="1811" cy:directed="1"/>
      <edge id="21009" label="ENSMUSG00000018899 (TF-TG) ENSMUSG00000042985" source="2190" target="1810" cy:directed="1"/>
      <edge id="21008" label="ENSMUSG00000018899 (TF-TG) ENSMUSG00000043004" source="2190" target="1809" cy:directed="1"/>
      <edge id="21007" label="ENSMUSG00000018899 (TF-TG) ENSMUSG00000043068" source="2190" target="1597" cy:directed="1"/>
      <edge id="21006" label="ENSMUSG00000018899 (TF-TG) ENSMUSG00000043391" source="2190" target="1242" cy:directed="1"/>
      <edge id="21005" label="ENSMUSG00000018899 (TF-TG) ENSMUSG00000043432" source="2190" target="1241" cy:directed="1"/>
      <edge id="21004" label="ENSMUSG00000018899 (TF-TG) ENSMUSG00000043885" source="2190" target="1240" cy:directed="1"/>
      <edge id="21003" label="ENSMUSG00000018899 (TF-TG) ENSMUSG00000043953" source="2190" target="1239" cy:directed="1"/>
      <edge id="21002" label="ENSMUSG00000018899 (TF-TG) ENSMUSG00000044066" source="2190" target="1804" cy:directed="1"/>
      <edge id="21001" label="ENSMUSG00000018899 (TF-TG) ENSMUSG00000044072" source="2190" target="1443" cy:directed="1"/>
      <edge id="21000" label="ENSMUSG00000018899 (TF-TG) ENSMUSG00000044317" source="2190" target="1238" cy:directed="1"/>
      <edge id="20999" label="ENSMUSG00000018899 (TF-TG) ENSMUSG00000044456" source="2190" target="1237" cy:directed="1"/>
      <edge id="20998" label="ENSMUSG00000018899 (TF-TG) ENSMUSG00000045094" source="2190" target="1236" cy:directed="1"/>
      <edge id="20997" label="ENSMUSG00000018899 (TF-TG) ENSMUSG00000045165" source="2190" target="1798" cy:directed="1"/>
      <edge id="20996" label="ENSMUSG00000018899 (TF-TG) ENSMUSG00000045328" source="2190" target="1235" cy:directed="1"/>
      <edge id="20995" label="ENSMUSG00000018899 (TF-TG) ENSMUSG00000045751" source="2190" target="1436" cy:directed="1"/>
      <edge id="20994" label="ENSMUSG00000018899 (TF-TG) ENSMUSG00000045817" source="2190" target="1234" cy:directed="1"/>
      <edge id="20993" label="ENSMUSG00000018899 (TF-TG) ENSMUSG00000045827" source="2190" target="1233" cy:directed="1"/>
      <edge id="20992" label="ENSMUSG00000018899 (TF-TG) ENSMUSG00000045932" source="2190" target="1796" cy:directed="1"/>
      <edge id="20991" label="ENSMUSG00000018899 (TF-TG) ENSMUSG00000046223" source="2190" target="1795" cy:directed="1"/>
      <edge id="20990" label="ENSMUSG00000018899 (TF-TG) ENSMUSG00000046242" source="2190" target="1594" cy:directed="1"/>
      <edge id="20989" label="ENSMUSG00000018899 (TF-TG) ENSMUSG00000046410" source="2190" target="1232" cy:directed="1"/>
      <edge id="20988" label="ENSMUSG00000018899 (TF-TG) ENSMUSG00000046447" source="2190" target="1794" cy:directed="1"/>
      <edge id="20987" label="ENSMUSG00000018899 (TF-TG) ENSMUSG00000046460" source="2190" target="1547" cy:directed="1"/>
      <edge id="20986" label="ENSMUSG00000018899 (TF-TG) ENSMUSG00000046546" source="2190" target="1593" cy:directed="1"/>
      <edge id="20985" label="ENSMUSG00000018899 (TF-TG) ENSMUSG00000046711" source="2190" target="1231" cy:directed="1"/>
      <edge id="20984" label="ENSMUSG00000018899 (TF-TG) ENSMUSG00000046805" source="2190" target="1546" cy:directed="1"/>
      <edge id="20983" label="ENSMUSG00000018899 (TF-TG) ENSMUSG00000047003" source="2190" target="1791" cy:directed="1"/>
      <edge id="20982" label="ENSMUSG00000018899 (TF-TG) ENSMUSG00000047044" source="2190" target="1790" cy:directed="1"/>
      <edge id="20981" label="ENSMUSG00000018899 (TF-TG) ENSMUSG00000047139" source="2190" target="1230" cy:directed="1"/>
      <edge id="20980" label="ENSMUSG00000018899 (TF-TG) ENSMUSG00000047181" source="2190" target="1229" cy:directed="1"/>
      <edge id="20979" label="ENSMUSG00000018899 (TF-TG) ENSMUSG00000047415" source="2190" target="1545" cy:directed="1"/>
      <edge id="20978" label="ENSMUSG00000018899 (TF-TG) ENSMUSG00000047534" source="2190" target="1783" cy:directed="1"/>
      <edge id="20977" label="ENSMUSG00000018899 (TF-TG) ENSMUSG00000048022" source="2190" target="1228" cy:directed="1"/>
      <edge id="20976" label="ENSMUSG00000018899 (TF-TG) ENSMUSG00000048058" source="2190" target="1777" cy:directed="1"/>
      <edge id="20975" label="ENSMUSG00000018899 (TF-TG) ENSMUSG00000048148" source="2190" target="1776" cy:directed="1"/>
      <edge id="20974" label="ENSMUSG00000018899 (TF-TG) ENSMUSG00000048216" source="2190" target="1227" cy:directed="1"/>
      <edge id="20973" label="ENSMUSG00000018899 (TF-TG) ENSMUSG00000048329" source="2190" target="1226" cy:directed="1"/>
      <edge id="20972" label="ENSMUSG00000018899 (TF-TG) ENSMUSG00000048349" source="2190" target="1368" cy:directed="1"/>
      <edge id="20971" label="ENSMUSG00000018899 (TF-TG) ENSMUSG00000048373" source="2190" target="1225" cy:directed="1"/>
      <edge id="20970" label="ENSMUSG00000018899 (TF-TG) ENSMUSG00000048473" source="2190" target="1774" cy:directed="1"/>
      <edge id="20969" label="ENSMUSG00000018899 (TF-TG) ENSMUSG00000048534" source="2190" target="1544" cy:directed="1"/>
      <edge id="20968" label="ENSMUSG00000018899 (TF-TG) ENSMUSG00000048612" source="2190" target="1224" cy:directed="1"/>
      <edge id="20967" label="ENSMUSG00000018899 (TF-TG) ENSMUSG00000048752" source="2190" target="1223" cy:directed="1"/>
      <edge id="20966" label="ENSMUSG00000018899 (TF-TG) ENSMUSG00000049281" source="2190" target="1222" cy:directed="1"/>
      <edge id="20965" label="ENSMUSG00000018899 (TF-TG) ENSMUSG00000049313" source="2190" target="1221" cy:directed="1"/>
      <edge id="20964" label="ENSMUSG00000018899 (TF-TG) ENSMUSG00000049436" source="2190" target="1220" cy:directed="1"/>
      <edge id="20963" label="ENSMUSG00000018899 (TF-TG) ENSMUSG00000049588" source="2190" target="1219" cy:directed="1"/>
      <edge id="20962" label="ENSMUSG00000018899 (TF-TG) ENSMUSG00000049723" source="2190" target="1218" cy:directed="1"/>
      <edge id="20961" label="ENSMUSG00000018899 (TF-TG) ENSMUSG00000049807" source="2190" target="1432" cy:directed="1"/>
      <edge id="20960" label="ENSMUSG00000018899 (TF-TG) ENSMUSG00000049858" source="2190" target="1431" cy:directed="1"/>
      <edge id="20959" label="ENSMUSG00000018899 (TF-TG) ENSMUSG00000049892" source="2190" target="1769" cy:directed="1"/>
      <edge id="20958" label="ENSMUSG00000018899 (TF-TG) ENSMUSG00000050052" source="2190" target="1767" cy:directed="1"/>
      <edge id="20957" label="ENSMUSG00000018899 (TF-TG) ENSMUSG00000050064" source="2190" target="1217" cy:directed="1"/>
      <edge id="20956" label="ENSMUSG00000018899 (TF-TG) ENSMUSG00000050097" source="2190" target="1216" cy:directed="1"/>
      <edge id="20955" label="ENSMUSG00000018899 (TF-TG) ENSMUSG00000050335" source="2190" target="1765" cy:directed="1"/>
      <edge id="20954" label="ENSMUSG00000018899 (TF-TG) ENSMUSG00000050395" source="2190" target="1430" cy:directed="1"/>
      <edge id="20953" label="ENSMUSG00000018899 (TF-TG) ENSMUSG00000051220" source="2190" target="1763" cy:directed="1"/>
      <edge id="20952" label="ENSMUSG00000018899 (TF-TG) ENSMUSG00000051335" source="2190" target="1761" cy:directed="1"/>
      <edge id="20951" label="ENSMUSG00000018899 (TF-TG) ENSMUSG00000051344" source="2190" target="1428" cy:directed="1"/>
      <edge id="20950" label="ENSMUSG00000018899 (TF-TG) ENSMUSG00000051457" source="2190" target="1760" cy:directed="1"/>
      <edge id="20949" label="ENSMUSG00000018899 (TF-TG) ENSMUSG00000051498" source="2190" target="1543" cy:directed="1"/>
      <edge id="20948" label="ENSMUSG00000018899 (TF-TG) ENSMUSG00000052085" source="2190" target="1759" cy:directed="1"/>
      <edge id="20947" label="ENSMUSG00000018899 (TF-TG) ENSMUSG00000052384" source="2190" target="1754" cy:directed="1"/>
      <edge id="20946" label="ENSMUSG00000018899 (TF-TG) ENSMUSG00000052631" source="2190" target="1215" cy:directed="1"/>
      <edge id="20945" label="ENSMUSG00000018899 (TF-TG) ENSMUSG00000053182" source="2190" target="1214" cy:directed="1"/>
      <edge id="20944" label="ENSMUSG00000018899 (TF-TG) ENSMUSG00000053334" source="2190" target="1752" cy:directed="1"/>
      <edge id="20943" label="ENSMUSG00000018899 (TF-TG) ENSMUSG00000053617" source="2190" target="1213" cy:directed="1"/>
      <edge id="20942" label="ENSMUSG00000018899 (TF-TG) ENSMUSG00000054200" source="2190" target="1212" cy:directed="1"/>
      <edge id="20941" label="ENSMUSG00000018899 (TF-TG) ENSMUSG00000054321" source="2190" target="1747" cy:directed="1"/>
      <edge id="20940" label="ENSMUSG00000018899 (TF-TG) ENSMUSG00000054342" source="2190" target="1746" cy:directed="1"/>
      <edge id="20939" label="ENSMUSG00000018899 (TF-TG) ENSMUSG00000054612" source="2190" target="1745" cy:directed="1"/>
      <edge id="20938" label="ENSMUSG00000018899 (TF-TG) ENSMUSG00000054717" source="2190" target="1744" cy:directed="1"/>
      <edge id="20937" label="ENSMUSG00000018899 (TF-TG) ENSMUSG00000054893" source="2190" target="1743" cy:directed="1"/>
      <edge id="20936" label="ENSMUSG00000018899 (TF-TG) ENSMUSG00000054920" source="2190" target="1742" cy:directed="1"/>
      <edge id="20935" label="ENSMUSG00000018899 (TF-TG) ENSMUSG00000055612" source="2190" target="1740" cy:directed="1"/>
      <edge id="20934" label="ENSMUSG00000018899 (TF-TG) ENSMUSG00000055976" source="2190" target="1211" cy:directed="1"/>
      <edge id="20933" label="ENSMUSG00000018899 (TF-TG) ENSMUSG00000056592" source="2190" target="1210" cy:directed="1"/>
      <edge id="20932" label="ENSMUSG00000018899 (TF-TG) ENSMUSG00000056602" source="2190" target="1736" cy:directed="1"/>
      <edge id="20931" label="ENSMUSG00000018899 (TF-TG) ENSMUSG00000056888" source="2190" target="1735" cy:directed="1"/>
      <edge id="20930" label="ENSMUSG00000018899 (TF-TG) ENSMUSG00000057137" source="2190" target="1733" cy:directed="1"/>
      <edge id="20929" label="ENSMUSG00000018899 (TF-TG) ENSMUSG00000058216" source="2190" target="1209" cy:directed="1"/>
      <edge id="20928" label="ENSMUSG00000018899 (TF-TG) ENSMUSG00000058624" source="2190" target="1580" cy:directed="1"/>
      <edge id="20927" label="ENSMUSG00000018899 (TF-TG) ENSMUSG00000058672" source="2190" target="1208" cy:directed="1"/>
      <edge id="20926" label="ENSMUSG00000018899 (TF-TG) ENSMUSG00000058799" source="2190" target="1727" cy:directed="1"/>
      <edge id="20925" label="ENSMUSG00000018899 (TF-TG) ENSMUSG00000059013" source="2190" target="1725" cy:directed="1"/>
      <edge id="20924" label="ENSMUSG00000018899 (TF-TG) ENSMUSG00000059336" source="2190" target="1724" cy:directed="1"/>
      <edge id="20923" label="ENSMUSG00000018899 (TF-TG) ENSMUSG00000059588" source="2190" target="1397" cy:directed="1"/>
      <edge id="20922" label="ENSMUSG00000018899 (TF-TG) ENSMUSG00000059939" source="2190" target="1722" cy:directed="1"/>
      <edge id="20921" label="ENSMUSG00000018899 (TF-TG) ENSMUSG00000060063" source="2190" target="1721" cy:directed="1"/>
      <edge id="20920" label="ENSMUSG00000018899 (TF-TG) ENSMUSG00000060429" source="2190" target="1207" cy:directed="1"/>
      <edge id="20919" label="ENSMUSG00000018899 (TF-TG) ENSMUSG00000060519" source="2190" target="1206" cy:directed="1"/>
      <edge id="20918" label="ENSMUSG00000018899 (TF-TG) ENSMUSG00000060548" source="2190" target="1205" cy:directed="1"/>
      <edge id="20917" label="ENSMUSG00000018899 (TF-TG) ENSMUSG00000060550" source="2190" target="1720" cy:directed="1"/>
      <edge id="20916" label="ENSMUSG00000018899 (TF-TG) ENSMUSG00000060671" source="2190" target="1421" cy:directed="1"/>
      <edge id="20915" label="ENSMUSG00000018899 (TF-TG) ENSMUSG00000061607" source="2190" target="1718" cy:directed="1"/>
      <edge id="20914" label="ENSMUSG00000018899 (TF-TG) ENSMUSG00000061718" source="2190" target="1717" cy:directed="1"/>
      <edge id="20913" label="ENSMUSG00000018899 (TF-TG) ENSMUSG00000062070" source="2190" target="1716" cy:directed="1"/>
      <edge id="20912" label="ENSMUSG00000018899 (TF-TG) ENSMUSG00000062078" source="2190" target="1363" cy:directed="1"/>
      <edge id="20911" label="ENSMUSG00000018899 (TF-TG) ENSMUSG00000062593" source="2190" target="1204" cy:directed="1"/>
      <edge id="20910" label="ENSMUSG00000018899 (TF-TG) ENSMUSG00000064090" source="2190" target="1576" cy:directed="1"/>
      <edge id="20909" label="ENSMUSG00000018899 (TF-TG) ENSMUSG00000064140" source="2190" target="1203" cy:directed="1"/>
      <edge id="20908" label="ENSMUSG00000018899 (TF-TG) ENSMUSG00000065952" source="2190" target="1202" cy:directed="1"/>
      <edge id="20907" label="ENSMUSG00000018899 (TF-TG) ENSMUSG00000066324" source="2190" target="1201" cy:directed="1"/>
      <edge id="20906" label="ENSMUSG00000018899 (TF-TG) ENSMUSG00000067297" source="2190" target="1200" cy:directed="1"/>
      <edge id="20905" label="ENSMUSG00000018899 (TF-TG) ENSMUSG00000068877" source="2190" target="1199" cy:directed="1"/>
      <edge id="20904" label="ENSMUSG00000018899 (TF-TG) ENSMUSG00000069114" source="2190" target="1415" cy:directed="1"/>
      <edge id="20903" label="ENSMUSG00000018899 (TF-TG) ENSMUSG00000069184" source="2190" target="1198" cy:directed="1"/>
      <edge id="20902" label="ENSMUSG00000018899 (TF-TG) ENSMUSG00000069255" source="2190" target="1360" cy:directed="1"/>
      <edge id="20901" label="ENSMUSG00000018899 (TF-TG) ENSMUSG00000069515" source="2190" target="1197" cy:directed="1"/>
      <edge id="20900" label="ENSMUSG00000018899 (TF-TG) ENSMUSG00000069793" source="2190" target="1196" cy:directed="1"/>
      <edge id="20899" label="ENSMUSG00000018899 (TF-TG) ENSMUSG00000069805" source="2190" target="1195" cy:directed="1"/>
      <edge id="20898" label="ENSMUSG00000018899 (TF-TG) ENSMUSG00000070284" source="2190" target="1708" cy:directed="1"/>
      <edge id="20897" label="ENSMUSG00000018899 (TF-TG) ENSMUSG00000070348" source="2190" target="2174" cy:directed="1"/>
      <edge id="20896" label="ENSMUSG00000018899 (TF-TG) ENSMUSG00000070407" source="2190" target="1413" cy:directed="1"/>
      <edge id="20895" label="ENSMUSG00000018899 (TF-TG) ENSMUSG00000070733" source="2190" target="1705" cy:directed="1"/>
      <edge id="20894" label="ENSMUSG00000018899 (TF-TG) ENSMUSG00000071103" source="2190" target="1194" cy:directed="1"/>
      <edge id="20893" label="ENSMUSG00000018899 (TF-TG) ENSMUSG00000071203" source="2190" target="1193" cy:directed="1"/>
      <edge id="20892" label="ENSMUSG00000018899 (TF-TG) ENSMUSG00000071537" source="2190" target="1192" cy:directed="1"/>
      <edge id="20891" label="ENSMUSG00000018899 (TF-TG) ENSMUSG00000072115" source="2190" target="1702" cy:directed="1"/>
      <edge id="20890" label="ENSMUSG00000018899 (TF-TG) ENSMUSG00000072235" source="2190" target="1701" cy:directed="1"/>
      <edge id="20889" label="ENSMUSG00000018899 (TF-TG) ENSMUSG00000072620" source="2190" target="1410" cy:directed="1"/>
      <edge id="20888" label="ENSMUSG00000018899 (TF-TG) ENSMUSG00000073207" source="2190" target="1191" cy:directed="1"/>
      <edge id="20887" label="ENSMUSG00000018899 (TF-TG) ENSMUSG00000073409" source="2190" target="1700" cy:directed="1"/>
      <edge id="20886" label="ENSMUSG00000018899 (TF-TG) ENSMUSG00000074063" source="2190" target="1699" cy:directed="1"/>
      <edge id="20885" label="ENSMUSG00000018899 (TF-TG) ENSMUSG00000074345" source="2190" target="1190" cy:directed="1"/>
      <edge id="20884" label="ENSMUSG00000018899 (TF-TG) ENSMUSG00000074785" source="2190" target="1694" cy:directed="1"/>
      <edge id="20883" label="ENSMUSG00000018899 (TF-TG) ENSMUSG00000074802" source="2190" target="1693" cy:directed="1"/>
      <edge id="20882" label="ENSMUSG00000018899 (TF-TG) ENSMUSG00000074896" source="2190" target="1189" cy:directed="1"/>
      <edge id="20881" label="ENSMUSG00000018899 (TF-TG) ENSMUSG00000075502" source="2190" target="1691" cy:directed="1"/>
      <edge id="20880" label="ENSMUSG00000018899 (TF-TG) ENSMUSG00000075702" source="2190" target="1409" cy:directed="1"/>
      <edge id="20879" label="ENSMUSG00000018899 (TF-TG) ENSMUSG00000078349" source="2190" target="1408" cy:directed="1"/>
      <edge id="20878" label="ENSMUSG00000018899 (TF-TG) ENSMUSG00000078773" source="2190" target="1686" cy:directed="1"/>
      <edge id="20877" label="ENSMUSG00000018899 (TF-TG) ENSMUSG00000078984" source="2190" target="1188" cy:directed="1"/>
      <edge id="20876" label="ENSMUSG00000018899 (TF-TG) ENSMUSG00000079037" source="2190" target="1685" cy:directed="1"/>
      <edge id="20875" label="ENSMUSG00000018899 (TF-TG) ENSMUSG00000079339" source="2190" target="1684" cy:directed="1"/>
      <edge id="20874" label="ENSMUSG00000018899 (TF-TG) ENSMUSG00000079442" source="2190" target="1187" cy:directed="1"/>
      <edge id="20873" label="ENSMUSG00000018899 (TF-TG) ENSMUSG00000079471" source="2190" target="1405" cy:directed="1"/>
      <edge id="20872" label="ENSMUSG00000018899 (TF-TG) ENSMUSG00000079553" source="2190" target="1683" cy:directed="1"/>
      <edge id="20871" label="ENSMUSG00000018899 (TF-TG) ENSMUSG00000079654" source="2190" target="1186" cy:directed="1"/>
      <edge id="20870" label="ENSMUSG00000018899 (TF-TG) ENSMUSG00000079685" source="2190" target="1404" cy:directed="1"/>
      <edge id="20869" label="ENSMUSG00000018899 (TF-TG) ENSMUSG00000090353" source="2190" target="1185" cy:directed="1"/>
      <edge id="20868" label="ENSMUSG00000018899 (TF-TG) ENSMUSG00000090626" source="2190" target="1402" cy:directed="1"/>
      <edge id="20867" label="ENSMUSG00000018899 (TF-TG) ENSMUSG00000094651" source="2190" target="1571" cy:directed="1"/>
      <edge id="20866" label="ENSMUSG00000018899 (TF-TG) ENSMUSG00000094928" source="2190" target="1681" cy:directed="1"/>
      <edge id="20865" label="ENSMUSG00000018899 (TF-TG) ENSMUSG00000098557" source="2190" target="1399" cy:directed="1"/>
      <edge id="20864" label="ENSMUSG00000018899 (TF-TG) ENSMUSG00000101605" source="2190" target="1184" cy:directed="1"/>
      <edge id="20863" label="ENSMUSG00000018899 (TF-TG) ENSMUSG00000108348" source="2190" target="1679" cy:directed="1"/>
      <edge id="20862" label="ENSMUSG00000018899 (TF-TG) ENSMUSG00000110206" source="2190" target="1677" cy:directed="1"/>
      <edge id="20861" label="ENSMUSG00000018899 (TF-lincRNA) ENSMUSG00000103043" source="2190" target="255" cy:directed="1"/>
      <edge id="20860" label="ENSMUSG00000018899 (TF-lincRNA) ENSMUSG00000097561" source="2190" target="253" cy:directed="1"/>
      <edge id="20859" label="ENSMUSG00000018899 (TF-lincRNA) ENSMUSG00000099552" source="2190" target="244" cy:directed="1"/>
      <edge id="20858" label="ENSMUSG00000018899 (TF-lincRNA) ENSMUSG00000097284" source="2190" target="243" cy:directed="1"/>
      <edge id="20857" label="ENSMUSG00000018899 (TF-lincRNA) ENSMUSG00000097415" source="2190" target="239" cy:directed="1"/>
      <edge id="20856" label="ENSMUSG00000018899 (TF-lincRNA) ENSMUSG00000075010" source="2190" target="230" cy:directed="1"/>
      <edge id="20855" label="ENSMUSG00000018899 (TF-lincRNA) ENSMUSG00000085329" source="2190" target="226" cy:directed="1"/>
      <edge id="20854" label="ENSMUSG00000018899 (TF-miRNA) mmu-miR-1945" source="2190" target="221" cy:directed="1"/>
      <edge id="20853" label="ENSMUSG00000022346 (TF-TG) ENSMUSG00000027381" source="2188" target="2187" cy:directed="1"/>
      <edge id="20852" label="ENSMUSG00000022346 (TF-TG) ENSMUSG00000027490" source="2188" target="2186" cy:directed="1"/>
      <edge id="20851" label="ENSMUSG00000022346 (TF-TG) ENSMUSG00000000120" source="2188" target="1128" cy:directed="1"/>
      <edge id="20850" label="ENSMUSG00000022346 (TF-TG) ENSMUSG00000000125" source="2188" target="1154" cy:directed="1"/>
      <edge id="20849" label="ENSMUSG00000022346 (TF-TG) ENSMUSG00000000126" source="2188" target="1669" cy:directed="1"/>
      <edge id="20848" label="ENSMUSG00000022346 (TF-TG) ENSMUSG00000000142" source="2188" target="2152" cy:directed="1"/>
      <edge id="20847" label="ENSMUSG00000022346 (TF-TG) ENSMUSG00000000202" source="2188" target="1127" cy:directed="1"/>
      <edge id="20846" label="ENSMUSG00000022346 (TF-TG) ENSMUSG00000000214" source="2188" target="1675" cy:directed="1"/>
      <edge id="20845" label="ENSMUSG00000022346 (TF-TG) ENSMUSG00000000253" source="2188" target="1126" cy:directed="1"/>
      <edge id="20844" label="ENSMUSG00000022346 (TF-TG) ENSMUSG00000000296" source="2188" target="1125" cy:directed="1"/>
      <edge id="20843" label="ENSMUSG00000022346 (TF-TG) ENSMUSG00000000317" source="2188" target="2151" cy:directed="1"/>
      <edge id="20842" label="ENSMUSG00000022346 (TF-TG) ENSMUSG00000000394" source="2188" target="1668" cy:directed="1"/>
      <edge id="20841" label="ENSMUSG00000022346 (TF-TG) ENSMUSG00000000416" source="2188" target="1124" cy:directed="1"/>
      <edge id="20840" label="ENSMUSG00000022346 (TF-TG) ENSMUSG00000000530" source="2188" target="1123" cy:directed="1"/>
      <edge id="20839" label="ENSMUSG00000022346 (TF-TG) ENSMUSG00000000555" source="2188" target="1352" cy:directed="1"/>
      <edge id="20838" label="ENSMUSG00000022346 (TF-TG) ENSMUSG00000000560" source="2188" target="1667" cy:directed="1"/>
      <edge id="20837" label="ENSMUSG00000022346 (TF-TG) ENSMUSG00000000594" source="2188" target="2150" cy:directed="1"/>
      <edge id="20836" label="ENSMUSG00000022346 (TF-TG) ENSMUSG00000000884" source="2188" target="1122" cy:directed="1"/>
      <edge id="20835" label="ENSMUSG00000022346 (TF-TG) ENSMUSG00000001025" source="2188" target="1535" cy:directed="1"/>
      <edge id="20834" label="ENSMUSG00000022346 (TF-TG) ENSMUSG00000001120" source="2188" target="2149" cy:directed="1"/>
      <edge id="20833" label="ENSMUSG00000022346 (TF-TG) ENSMUSG00000001228" source="2188" target="1121" cy:directed="1"/>
      <edge id="20832" label="ENSMUSG00000022346 (TF-TG) ENSMUSG00000001281" source="2188" target="1351" cy:directed="1"/>
      <edge id="20831" label="ENSMUSG00000022346 (TF-TG) ENSMUSG00000001333" source="2188" target="1120" cy:directed="1"/>
      <edge id="20830" label="ENSMUSG00000022346 (TF-TG) ENSMUSG00000001435" source="2188" target="1119" cy:directed="1"/>
      <edge id="20829" label="ENSMUSG00000022346 (TF-TG) ENSMUSG00000001525" source="2188" target="1118" cy:directed="1"/>
      <edge id="20828" label="ENSMUSG00000022346 (TF-TG) ENSMUSG00000001761" source="2188" target="1350" cy:directed="1"/>
      <edge id="20827" label="ENSMUSG00000022346 (TF-TG) ENSMUSG00000001802" source="2188" target="1117" cy:directed="1"/>
      <edge id="20826" label="ENSMUSG00000022346 (TF-TG) ENSMUSG00000001819" source="2188" target="1672" cy:directed="1"/>
      <edge id="20825" label="ENSMUSG00000022346 (TF-TG) ENSMUSG00000001901" source="2188" target="1116" cy:directed="1"/>
      <edge id="20824" label="ENSMUSG00000022346 (TF-TG) ENSMUSG00000001985" source="2188" target="1395" cy:directed="1"/>
      <edge id="20823" label="ENSMUSG00000022346 (TF-TG) ENSMUSG00000002006" source="2188" target="1115" cy:directed="1"/>
      <edge id="20822" label="ENSMUSG00000022346 (TF-TG) ENSMUSG00000002055" source="2188" target="1153" cy:directed="1"/>
      <edge id="20821" label="ENSMUSG00000022346 (TF-TG) ENSMUSG00000002107" source="2188" target="1114" cy:directed="1"/>
      <edge id="20820" label="ENSMUSG00000022346 (TF-TG) ENSMUSG00000002109" source="2188" target="2173" cy:directed="1"/>
      <edge id="20819" label="ENSMUSG00000022346 (TF-TG) ENSMUSG00000002227" source="2188" target="2147" cy:directed="1"/>
      <edge id="20818" label="ENSMUSG00000022346 (TF-TG) ENSMUSG00000002233" source="2188" target="1113" cy:directed="1"/>
      <edge id="20817" label="ENSMUSG00000022346 (TF-TG) ENSMUSG00000002341" source="2188" target="1112" cy:directed="1"/>
      <edge id="20816" label="ENSMUSG00000022346 (TF-TG) ENSMUSG00000002489" source="2188" target="2146" cy:directed="1"/>
      <edge id="20815" label="ENSMUSG00000022346 (TF-TG) ENSMUSG00000002504" source="2188" target="1111" cy:directed="1"/>
      <edge id="20814" label="ENSMUSG00000022346 (TF-TG) ENSMUSG00000002565" source="2188" target="2145" cy:directed="1"/>
      <edge id="20813" label="ENSMUSG00000022346 (TF-TG) ENSMUSG00000002668" source="2188" target="1349" cy:directed="1"/>
      <edge id="20812" label="ENSMUSG00000022346 (TF-TG) ENSMUSG00000002835" source="2188" target="2144" cy:directed="1"/>
      <edge id="20811" label="ENSMUSG00000022346 (TF-TG) ENSMUSG00000002870" source="2188" target="2143" cy:directed="1"/>
      <edge id="20810" label="ENSMUSG00000022346 (TF-TG) ENSMUSG00000002885" source="2188" target="2142" cy:directed="1"/>
      <edge id="20809" label="ENSMUSG00000022346 (TF-TG) ENSMUSG00000002997" source="2188" target="2141" cy:directed="1"/>
      <edge id="20808" label="ENSMUSG00000022346 (TF-TG) ENSMUSG00000003032" source="2188" target="2140" cy:directed="1"/>
      <edge id="20807" label="ENSMUSG00000022346 (TF-TG) ENSMUSG00000003134" source="2188" target="2139" cy:directed="1"/>
      <edge id="20806" label="ENSMUSG00000022346 (TF-TG) ENSMUSG00000003228" source="2188" target="1348" cy:directed="1"/>
      <edge id="20805" label="ENSMUSG00000022346 (TF-TG) ENSMUSG00000003273" source="2188" target="2138" cy:directed="1"/>
      <edge id="20804" label="ENSMUSG00000022346 (TF-TG) ENSMUSG00000003283" source="2188" target="1534" cy:directed="1"/>
      <edge id="20803" label="ENSMUSG00000022346 (TF-TG) ENSMUSG00000003355" source="2188" target="1110" cy:directed="1"/>
      <edge id="20802" label="ENSMUSG00000022346 (TF-TG) ENSMUSG00000003411" source="2188" target="1109" cy:directed="1"/>
      <edge id="20801" label="ENSMUSG00000022346 (TF-TG) ENSMUSG00000003418" source="2188" target="1108" cy:directed="1"/>
      <edge id="20800" label="ENSMUSG00000022346 (TF-TG) ENSMUSG00000003436" source="2188" target="1533" cy:directed="1"/>
      <edge id="20799" label="ENSMUSG00000022346 (TF-TG) ENSMUSG00000003541" source="2188" target="1346" cy:directed="1"/>
      <edge id="20798" label="ENSMUSG00000022346 (TF-TG) ENSMUSG00000003545" source="2188" target="2137" cy:directed="1"/>
      <edge id="20797" label="ENSMUSG00000022346 (TF-TG) ENSMUSG00000003992" source="2188" target="2136" cy:directed="1"/>
      <edge id="20796" label="ENSMUSG00000022346 (TF-TG) ENSMUSG00000004038" source="2188" target="1107" cy:directed="1"/>
      <edge id="20795" label="ENSMUSG00000022346 (TF-TG) ENSMUSG00000004113" source="2188" target="1666" cy:directed="1"/>
      <edge id="20794" label="ENSMUSG00000022346 (TF-TG) ENSMUSG00000004151" source="2188" target="2135" cy:directed="1"/>
      <edge id="20793" label="ENSMUSG00000022346 (TF-TG) ENSMUSG00000004347" source="2188" target="1106" cy:directed="1"/>
      <edge id="20792" label="ENSMUSG00000022346 (TF-TG) ENSMUSG00000004366" source="2188" target="1665" cy:directed="1"/>
      <edge id="20791" label="ENSMUSG00000022346 (TF-TG) ENSMUSG00000004654" source="2188" target="1105" cy:directed="1"/>
      <edge id="20790" label="ENSMUSG00000022346 (TF-TG) ENSMUSG00000004709" source="2188" target="1345" cy:directed="1"/>
      <edge id="20789" label="ENSMUSG00000022346 (TF-TG) ENSMUSG00000004951" source="2188" target="1532" cy:directed="1"/>
      <edge id="20788" label="ENSMUSG00000022346 (TF-TG) ENSMUSG00000004952" source="2188" target="1344" cy:directed="1"/>
      <edge id="20787" label="ENSMUSG00000022346 (TF-TG) ENSMUSG00000005267" source="2188" target="2134" cy:directed="1"/>
      <edge id="20786" label="ENSMUSG00000022346 (TF-TG) ENSMUSG00000005360" source="2188" target="1664" cy:directed="1"/>
      <edge id="20785" label="ENSMUSG00000022346 (TF-TG) ENSMUSG00000005370" source="2188" target="2133" cy:directed="1"/>
      <edge id="20784" label="ENSMUSG00000022346 (TF-TG) ENSMUSG00000005410" source="2188" target="2132" cy:directed="1"/>
      <edge id="20783" label="ENSMUSG00000022346 (TF-TG) ENSMUSG00000005470" source="2188" target="1104" cy:directed="1"/>
      <edge id="20782" label="ENSMUSG00000022346 (TF-TG) ENSMUSG00000005533" source="2188" target="2131" cy:directed="1"/>
      <edge id="20781" label="ENSMUSG00000022346 (TF-TG) ENSMUSG00000005672" source="2188" target="1152" cy:directed="1"/>
      <edge id="20780" label="ENSMUSG00000022346 (TF-TG) ENSMUSG00000005873" source="2188" target="1343" cy:directed="1"/>
      <edge id="20779" label="ENSMUSG00000022346 (TF-TG) ENSMUSG00000005973" source="2188" target="2130" cy:directed="1"/>
      <edge id="20778" label="ENSMUSG00000022346 (TF-TG) ENSMUSG00000006342" source="2188" target="1103" cy:directed="1"/>
      <edge id="20777" label="ENSMUSG00000022346 (TF-TG) ENSMUSG00000006386" source="2188" target="1102" cy:directed="1"/>
      <edge id="20776" label="ENSMUSG00000022346 (TF-TG) ENSMUSG00000006398" source="2188" target="2172" cy:directed="1"/>
      <edge id="20775" label="ENSMUSG00000022346 (TF-TG) ENSMUSG00000006435" source="2188" target="1663" cy:directed="1"/>
      <edge id="20774" label="ENSMUSG00000022346 (TF-TG) ENSMUSG00000006494" source="2188" target="2129" cy:directed="1"/>
      <edge id="20773" label="ENSMUSG00000022346 (TF-TG) ENSMUSG00000006546" source="2188" target="1342" cy:directed="1"/>
      <edge id="20772" label="ENSMUSG00000022346 (TF-TG) ENSMUSG00000006575" source="2188" target="1531" cy:directed="1"/>
      <edge id="20771" label="ENSMUSG00000022346 (TF-TG) ENSMUSG00000006586" source="2188" target="1394" cy:directed="1"/>
      <edge id="20770" label="ENSMUSG00000022346 (TF-TG) ENSMUSG00000006651" source="2188" target="1101" cy:directed="1"/>
      <edge id="20769" label="ENSMUSG00000022346 (TF-TG) ENSMUSG00000006675" source="2188" target="1100" cy:directed="1"/>
      <edge id="20768" label="ENSMUSG00000022346 (TF-TG) ENSMUSG00000006678" source="2188" target="2171" cy:directed="1"/>
      <edge id="20767" label="ENSMUSG00000022346 (TF-TG) ENSMUSG00000006715" source="2188" target="2128" cy:directed="1"/>
      <edge id="20766" label="ENSMUSG00000022346 (TF-TG) ENSMUSG00000006784" source="2188" target="2127" cy:directed="1"/>
      <edge id="20765" label="ENSMUSG00000022346 (TF-TG) ENSMUSG00000006930" source="2188" target="1530" cy:directed="1"/>
      <edge id="20764" label="ENSMUSG00000022346 (TF-TG) ENSMUSG00000007080" source="2188" target="1099" cy:directed="1"/>
      <edge id="20763" label="ENSMUSG00000022346 (TF-TG) ENSMUSG00000007207" source="2188" target="2126" cy:directed="1"/>
      <edge id="20762" label="ENSMUSG00000022346 (TF-TG) ENSMUSG00000007379" source="2188" target="1098" cy:directed="1"/>
      <edge id="20761" label="ENSMUSG00000022346 (TF-TG) ENSMUSG00000007783" source="2188" target="1097" cy:directed="1"/>
      <edge id="20760" label="ENSMUSG00000022346 (TF-TG) ENSMUSG00000007827" source="2188" target="2125" cy:directed="1"/>
      <edge id="20759" label="ENSMUSG00000022346 (TF-TG) ENSMUSG00000007989" source="2188" target="1529" cy:directed="1"/>
      <edge id="20758" label="ENSMUSG00000022346 (TF-TG) ENSMUSG00000008193" source="2188" target="1558" cy:directed="1"/>
      <edge id="20757" label="ENSMUSG00000022346 (TF-TG) ENSMUSG00000008398" source="2188" target="1537" cy:directed="1"/>
      <edge id="20756" label="ENSMUSG00000022346 (TF-TG) ENSMUSG00000008461" source="2188" target="1096" cy:directed="1"/>
      <edge id="20755" label="ENSMUSG00000022346 (TF-TG) ENSMUSG00000008734" source="2188" target="1095" cy:directed="1"/>
      <edge id="20754" label="ENSMUSG00000022346 (TF-TG) ENSMUSG00000009092" source="2188" target="1341" cy:directed="1"/>
      <edge id="20753" label="ENSMUSG00000022346 (TF-TG) ENSMUSG00000009108" source="2188" target="1340" cy:directed="1"/>
      <edge id="20752" label="ENSMUSG00000022346 (TF-TG) ENSMUSG00000009246" source="2188" target="1339" cy:directed="1"/>
      <edge id="20751" label="ENSMUSG00000022346 (TF-TG) ENSMUSG00000009292" source="2188" target="2124" cy:directed="1"/>
      <edge id="20750" label="ENSMUSG00000022346 (TF-TG) ENSMUSG00000009378" source="2188" target="1094" cy:directed="1"/>
      <edge id="20749" label="ENSMUSG00000022346 (TF-TG) ENSMUSG00000009545" source="2188" target="1151" cy:directed="1"/>
      <edge id="20748" label="ENSMUSG00000022346 (TF-TG) ENSMUSG00000009575" source="2188" target="2123" cy:directed="1"/>
      <edge id="20747" label="ENSMUSG00000022346 (TF-TG) ENSMUSG00000009731" source="2188" target="1093" cy:directed="1"/>
      <edge id="20746" label="ENSMUSG00000022346 (TF-TG) ENSMUSG00000010066" source="2188" target="1092" cy:directed="1"/>
      <edge id="20745" label="ENSMUSG00000022346 (TF-TG) ENSMUSG00000010307" source="2188" target="1091" cy:directed="1"/>
      <edge id="20744" label="ENSMUSG00000022346 (TF-TG) ENSMUSG00000010362" source="2188" target="2122" cy:directed="1"/>
      <edge id="20743" label="ENSMUSG00000022346 (TF-TG) ENSMUSG00000010505" source="2188" target="1662" cy:directed="1"/>
      <edge id="20742" label="ENSMUSG00000022346 (TF-TG) ENSMUSG00000010803" source="2188" target="1090" cy:directed="1"/>
      <edge id="20741" label="ENSMUSG00000022346 (TF-TG) ENSMUSG00000010825" source="2188" target="1182" cy:directed="1"/>
      <edge id="20740" label="ENSMUSG00000022346 (TF-TG) ENSMUSG00000010830" source="2188" target="1661" cy:directed="1"/>
      <edge id="20739" label="ENSMUSG00000022346 (TF-TG) ENSMUSG00000011148" source="2188" target="2121" cy:directed="1"/>
      <edge id="20738" label="ENSMUSG00000022346 (TF-TG) ENSMUSG00000011256" source="2188" target="1089" cy:directed="1"/>
      <edge id="20737" label="ENSMUSG00000022346 (TF-TG) ENSMUSG00000012350" source="2188" target="1396" cy:directed="1"/>
      <edge id="20736" label="ENSMUSG00000022346 (TF-TG) ENSMUSG00000012443" source="2188" target="2120" cy:directed="1"/>
      <edge id="20735" label="ENSMUSG00000022346 (TF-TG) ENSMUSG00000013523" source="2188" target="1337" cy:directed="1"/>
      <edge id="20734" label="ENSMUSG00000022346 (TF-TG) ENSMUSG00000013698" source="2188" target="1336" cy:directed="1"/>
      <edge id="20733" label="ENSMUSG00000022346 (TF-TG) ENSMUSG00000013846" source="2188" target="1528" cy:directed="1"/>
      <edge id="20732" label="ENSMUSG00000022346 (TF-TG) ENSMUSG00000013921" source="2188" target="1088" cy:directed="1"/>
      <edge id="20731" label="ENSMUSG00000022346 (TF-TG) ENSMUSG00000014164" source="2188" target="1660" cy:directed="1"/>
      <edge id="20730" label="ENSMUSG00000022346 (TF-TG) ENSMUSG00000014351" source="2188" target="1659" cy:directed="1"/>
      <edge id="20729" label="ENSMUSG00000022346 (TF-TG) ENSMUSG00000014602" source="2188" target="1087" cy:directed="1"/>
      <edge id="20728" label="ENSMUSG00000022346 (TF-TG) ENSMUSG00000014786" source="2188" target="2119" cy:directed="1"/>
      <edge id="20727" label="ENSMUSG00000022346 (TF-TG) ENSMUSG00000015222" source="2188" target="1086" cy:directed="1"/>
      <edge id="20726" label="ENSMUSG00000022346 (TF-TG) ENSMUSG00000015396" source="2188" target="1335" cy:directed="1"/>
      <edge id="20725" label="ENSMUSG00000022346 (TF-TG) ENSMUSG00000015401" source="2188" target="1569" cy:directed="1"/>
      <edge id="20724" label="ENSMUSG00000022346 (TF-TG) ENSMUSG00000015468" source="2188" target="1356" cy:directed="1"/>
      <edge id="20723" label="ENSMUSG00000022346 (TF-TG) ENSMUSG00000015568" source="2188" target="1085" cy:directed="1"/>
      <edge id="20722" label="ENSMUSG00000022346 (TF-TG) ENSMUSG00000015745" source="2188" target="2118" cy:directed="1"/>
      <edge id="20721" label="ENSMUSG00000022346 (TF-TG) ENSMUSG00000015880" source="2188" target="2117" cy:directed="1"/>
      <edge id="20720" label="ENSMUSG00000022346 (TF-TG) ENSMUSG00000015962" source="2188" target="1334" cy:directed="1"/>
      <edge id="20719" label="ENSMUSG00000022346 (TF-TG) ENSMUSG00000016200" source="2188" target="1333" cy:directed="1"/>
      <edge id="20718" label="ENSMUSG00000022346 (TF-TG) ENSMUSG00000016526" source="2188" target="2116" cy:directed="1"/>
      <edge id="20717" label="ENSMUSG00000022346 (TF-TG) ENSMUSG00000016763" source="2188" target="1084" cy:directed="1"/>
      <edge id="20716" label="ENSMUSG00000022346 (TF-TG) ENSMUSG00000017009" source="2188" target="1332" cy:directed="1"/>
      <edge id="20715" label="ENSMUSG00000022346 (TF-TG) ENSMUSG00000017057" source="2188" target="1331" cy:directed="1"/>
      <edge id="20714" label="ENSMUSG00000022346 (TF-TG) ENSMUSG00000017144" source="2188" target="1330" cy:directed="1"/>
      <edge id="20713" label="ENSMUSG00000022346 (TF-TG) ENSMUSG00000017165" source="2188" target="2115" cy:directed="1"/>
      <edge id="20712" label="ENSMUSG00000022346 (TF-TG) ENSMUSG00000017204" source="2188" target="1083" cy:directed="1"/>
      <edge id="20711" label="ENSMUSG00000022346 (TF-TG) ENSMUSG00000017211" source="2188" target="1082" cy:directed="1"/>
      <edge id="20710" label="ENSMUSG00000022346 (TF-TG) ENSMUSG00000017446" source="2188" target="2114" cy:directed="1"/>
      <edge id="20709" label="ENSMUSG00000022346 (TF-TG) ENSMUSG00000017466" source="2188" target="2113" cy:directed="1"/>
      <edge id="20708" label="ENSMUSG00000022346 (TF-TG) ENSMUSG00000017493" source="2188" target="2112" cy:directed="1"/>
      <edge id="20707" label="ENSMUSG00000022346 (TF-TG) ENSMUSG00000017499" source="2188" target="2170" cy:directed="1"/>
      <edge id="20706" label="ENSMUSG00000022346 (TF-TG) ENSMUSG00000017550" source="2188" target="2111" cy:directed="1"/>
      <edge id="20705" label="ENSMUSG00000022346 (TF-TG) ENSMUSG00000017607" source="2188" target="1081" cy:directed="1"/>
      <edge id="20704" label="ENSMUSG00000022346 (TF-TG) ENSMUSG00000017639" source="2188" target="1080" cy:directed="1"/>
      <edge id="20703" label="ENSMUSG00000022346 (TF-TG) ENSMUSG00000017652" source="2188" target="1658" cy:directed="1"/>
      <edge id="20702" label="ENSMUSG00000022346 (TF-TG) ENSMUSG00000017692" source="2188" target="1079" cy:directed="1"/>
      <edge id="20701" label="ENSMUSG00000022346 (TF-TG) ENSMUSG00000017716" source="2188" target="2110" cy:directed="1"/>
      <edge id="20700" label="ENSMUSG00000022346 (TF-TG) ENSMUSG00000017724" source="2188" target="1354" cy:directed="1"/>
      <edge id="20699" label="ENSMUSG00000022346 (TF-TG) ENSMUSG00000017861" source="2188" target="2192" cy:directed="1"/>
      <edge id="20698" label="ENSMUSG00000022346 (TF-TG) ENSMUSG00000017868" source="2188" target="1329" cy:directed="1"/>
      <edge id="20697" label="ENSMUSG00000022346 (TF-TG) ENSMUSG00000017943" source="2188" target="1078" cy:directed="1"/>
      <edge id="20696" label="ENSMUSG00000022346 (TF-TG) ENSMUSG00000018169" source="2188" target="1527" cy:directed="1"/>
      <edge id="20695" label="ENSMUSG00000022346 (TF-TG) ENSMUSG00000018339" source="2188" target="1077" cy:directed="1"/>
      <edge id="20694" label="ENSMUSG00000022346 (TF-TG) ENSMUSG00000018340" source="2188" target="2109" cy:directed="1"/>
      <edge id="20693" label="ENSMUSG00000022346 (TF-TG) ENSMUSG00000018470" source="2188" target="1076" cy:directed="1"/>
      <edge id="20692" label="ENSMUSG00000022346 (TF-TG) ENSMUSG00000018486" source="2188" target="1075" cy:directed="1"/>
      <edge id="20691" label="ENSMUSG00000022346 (TF-TG) ENSMUSG00000018554" source="2188" target="1074" cy:directed="1"/>
      <edge id="20690" label="ENSMUSG00000022346 (TF-TG) ENSMUSG00000018620" source="2188" target="1073" cy:directed="1"/>
      <edge id="20689" label="ENSMUSG00000022346 (TF-TG) ENSMUSG00000018672" source="2188" target="1072" cy:directed="1"/>
      <edge id="20688" label="ENSMUSG00000022346 (TF-TG) ENSMUSG00000018740" source="2188" target="2108" cy:directed="1"/>
      <edge id="20687" label="ENSMUSG00000022346 (TF-TG) ENSMUSG00000018865" source="2188" target="1071" cy:directed="1"/>
      <edge id="20686" label="ENSMUSG00000022346 (TF-TG) ENSMUSG00000018899" source="2188" target="2190" cy:directed="1"/>
      <edge id="20685" label="ENSMUSG00000022346 (TF-TG) ENSMUSG00000019066" source="2188" target="2107" cy:directed="1"/>
      <edge id="20684" label="ENSMUSG00000022346 (TF-TG) ENSMUSG00000019122" source="2188" target="1070" cy:directed="1"/>
      <edge id="20683" label="ENSMUSG00000022346 (TF-TG) ENSMUSG00000019124" source="2188" target="1181" cy:directed="1"/>
      <edge id="20682" label="ENSMUSG00000022346 (TF-TG) ENSMUSG00000019188" source="2188" target="1526" cy:directed="1"/>
      <edge id="20681" label="ENSMUSG00000022346 (TF-TG) ENSMUSG00000019232" source="2188" target="1392" cy:directed="1"/>
      <edge id="20680" label="ENSMUSG00000022346 (TF-TG) ENSMUSG00000019235" source="2188" target="1069" cy:directed="1"/>
      <edge id="20679" label="ENSMUSG00000022346 (TF-TG) ENSMUSG00000019302" source="2188" target="2106" cy:directed="1"/>
      <edge id="20678" label="ENSMUSG00000022346 (TF-TG) ENSMUSG00000019303" source="2188" target="2105" cy:directed="1"/>
      <edge id="20677" label="ENSMUSG00000022346 (TF-TG) ENSMUSG00000019564" source="2188" target="2104" cy:directed="1"/>
      <edge id="20676" label="ENSMUSG00000022346 (TF-TG) ENSMUSG00000019761" source="2188" target="1657" cy:directed="1"/>
      <edge id="20675" label="ENSMUSG00000022346 (TF-TG) ENSMUSG00000019773" source="2188" target="2103" cy:directed="1"/>
      <edge id="20674" label="ENSMUSG00000022346 (TF-TG) ENSMUSG00000019775" source="2188" target="1068" cy:directed="1"/>
      <edge id="20673" label="ENSMUSG00000022346 (TF-TG) ENSMUSG00000019796" source="2188" target="2102" cy:directed="1"/>
      <edge id="20672" label="ENSMUSG00000022346 (TF-TG) ENSMUSG00000019831" source="2188" target="2101" cy:directed="1"/>
      <edge id="20671" label="ENSMUSG00000022346 (TF-TG) ENSMUSG00000019846" source="2188" target="1673" cy:directed="1"/>
      <edge id="20670" label="ENSMUSG00000022346 (TF-TG) ENSMUSG00000019876" source="2188" target="1067" cy:directed="1"/>
      <edge id="20669" label="ENSMUSG00000022346 (TF-TG) ENSMUSG00000019890" source="2188" target="1066" cy:directed="1"/>
      <edge id="20668" label="ENSMUSG00000022346 (TF-TG) ENSMUSG00000019906" source="2188" target="1065" cy:directed="1"/>
      <edge id="20667" label="ENSMUSG00000022346 (TF-TG) ENSMUSG00000019942" source="2188" target="2169" cy:directed="1"/>
      <edge id="20666" label="ENSMUSG00000022346 (TF-TG) ENSMUSG00000019944" source="2188" target="1064" cy:directed="1"/>
      <edge id="20665" label="ENSMUSG00000022346 (TF-TG) ENSMUSG00000019945" source="2188" target="1063" cy:directed="1"/>
      <edge id="20664" label="ENSMUSG00000022346 (TF-TG) ENSMUSG00000019947" source="2188" target="2100" cy:directed="1"/>
      <edge id="20663" label="ENSMUSG00000022346 (TF-TG) ENSMUSG00000019982" source="2188" target="2099" cy:directed="1"/>
      <edge id="20662" label="ENSMUSG00000022346 (TF-TG) ENSMUSG00000019986" source="2188" target="2098" cy:directed="1"/>
      <edge id="20661" label="ENSMUSG00000022346 (TF-TG) ENSMUSG00000019989" source="2188" target="1062" cy:directed="1"/>
      <edge id="20660" label="ENSMUSG00000022346 (TF-TG) ENSMUSG00000019992" source="2188" target="1061" cy:directed="1"/>
      <edge id="20659" label="ENSMUSG00000022346 (TF-TG) ENSMUSG00000020019" source="2188" target="1060" cy:directed="1"/>
      <edge id="20658" label="ENSMUSG00000022346 (TF-TG) ENSMUSG00000020034" source="2188" target="2097" cy:directed="1"/>
      <edge id="20657" label="ENSMUSG00000022346 (TF-TG) ENSMUSG00000020044" source="2188" target="1059" cy:directed="1"/>
      <edge id="20656" label="ENSMUSG00000022346 (TF-TG) ENSMUSG00000020086" source="2188" target="1058" cy:directed="1"/>
      <edge id="20655" label="ENSMUSG00000022346 (TF-TG) ENSMUSG00000020121" source="2188" target="1656" cy:directed="1"/>
      <edge id="20654" label="ENSMUSG00000022346 (TF-TG) ENSMUSG00000020131" source="2188" target="1524" cy:directed="1"/>
      <edge id="20653" label="ENSMUSG00000022346 (TF-TG) ENSMUSG00000020135" source="2188" target="1523" cy:directed="1"/>
      <edge id="20652" label="ENSMUSG00000022346 (TF-TG) ENSMUSG00000020140" source="2188" target="1057" cy:directed="1"/>
      <edge id="20651" label="ENSMUSG00000022346 (TF-TG) ENSMUSG00000020151" source="2188" target="1056" cy:directed="1"/>
      <edge id="20650" label="ENSMUSG00000022346 (TF-TG) ENSMUSG00000020175" source="2188" target="1055" cy:directed="1"/>
      <edge id="20649" label="ENSMUSG00000022346 (TF-TG) ENSMUSG00000020176" source="2188" target="1054" cy:directed="1"/>
      <edge id="20648" label="ENSMUSG00000022346 (TF-TG) ENSMUSG00000020178" source="2188" target="1053" cy:directed="1"/>
      <edge id="20647" label="ENSMUSG00000022346 (TF-TG) ENSMUSG00000020182" source="2188" target="1522" cy:directed="1"/>
      <edge id="20646" label="ENSMUSG00000022346 (TF-TG) ENSMUSG00000020185" source="2188" target="2096" cy:directed="1"/>
      <edge id="20645" label="ENSMUSG00000022346 (TF-TG) ENSMUSG00000020218" source="2188" target="1328" cy:directed="1"/>
      <edge id="20644" label="ENSMUSG00000022346 (TF-TG) ENSMUSG00000020226" source="2188" target="1521" cy:directed="1"/>
      <edge id="20643" label="ENSMUSG00000022346 (TF-TG) ENSMUSG00000020230" source="2188" target="2095" cy:directed="1"/>
      <edge id="20642" label="ENSMUSG00000022346 (TF-TG) ENSMUSG00000020256" source="2188" target="1052" cy:directed="1"/>
      <edge id="20641" label="ENSMUSG00000022346 (TF-TG) ENSMUSG00000020261" source="2188" target="2094" cy:directed="1"/>
      <edge id="20640" label="ENSMUSG00000022346 (TF-TG) ENSMUSG00000020303" source="2188" target="1655" cy:directed="1"/>
      <edge id="20639" label="ENSMUSG00000022346 (TF-TG) ENSMUSG00000020333" source="2188" target="1051" cy:directed="1"/>
      <edge id="20638" label="ENSMUSG00000022346 (TF-TG) ENSMUSG00000020381" source="2188" target="1050" cy:directed="1"/>
      <edge id="20637" label="ENSMUSG00000022346 (TF-TG) ENSMUSG00000020405" source="2188" target="1049" cy:directed="1"/>
      <edge id="20636" label="ENSMUSG00000022346 (TF-TG) ENSMUSG00000020423" source="2188" target="1132" cy:directed="1"/>
      <edge id="20635" label="ENSMUSG00000022346 (TF-TG) ENSMUSG00000020424" source="2188" target="1520" cy:directed="1"/>
      <edge id="20634" label="ENSMUSG00000022346 (TF-TG) ENSMUSG00000020427" source="2188" target="1391" cy:directed="1"/>
      <edge id="20633" label="ENSMUSG00000022346 (TF-TG) ENSMUSG00000020431" source="2188" target="1048" cy:directed="1"/>
      <edge id="20632" label="ENSMUSG00000022346 (TF-TG) ENSMUSG00000020462" source="2188" target="1047" cy:directed="1"/>
      <edge id="20631" label="ENSMUSG00000022346 (TF-TG) ENSMUSG00000020469" source="2188" target="1046" cy:directed="1"/>
      <edge id="20630" label="ENSMUSG00000022346 (TF-TG) ENSMUSG00000020471" source="2188" target="2093" cy:directed="1"/>
      <edge id="20629" label="ENSMUSG00000022346 (TF-TG) ENSMUSG00000020472" source="2188" target="1557" cy:directed="1"/>
      <edge id="20628" label="ENSMUSG00000022346 (TF-TG) ENSMUSG00000020571" source="2188" target="1045" cy:directed="1"/>
      <edge id="20627" label="ENSMUSG00000022346 (TF-TG) ENSMUSG00000020573" source="2188" target="2091" cy:directed="1"/>
      <edge id="20626" label="ENSMUSG00000022346 (TF-TG) ENSMUSG00000020576" source="2188" target="1044" cy:directed="1"/>
      <edge id="20625" label="ENSMUSG00000022346 (TF-TG) ENSMUSG00000020577" source="2188" target="2090" cy:directed="1"/>
      <edge id="20624" label="ENSMUSG00000022346 (TF-TG) ENSMUSG00000020581" source="2188" target="1327" cy:directed="1"/>
      <edge id="20623" label="ENSMUSG00000022346 (TF-TG) ENSMUSG00000020620" source="2188" target="1326" cy:directed="1"/>
      <edge id="20622" label="ENSMUSG00000022346 (TF-TG) ENSMUSG00000020635" source="2188" target="1043" cy:directed="1"/>
      <edge id="20621" label="ENSMUSG00000022346 (TF-TG) ENSMUSG00000020641" source="2188" target="1519" cy:directed="1"/>
      <edge id="20620" label="ENSMUSG00000022346 (TF-TG) ENSMUSG00000020649" source="2188" target="2089" cy:directed="1"/>
      <edge id="20619" label="ENSMUSG00000022346 (TF-TG) ENSMUSG00000020668" source="2188" target="2088" cy:directed="1"/>
      <edge id="20618" label="ENSMUSG00000022346 (TF-TG) ENSMUSG00000020682" source="2188" target="1042" cy:directed="1"/>
      <edge id="20617" label="ENSMUSG00000022346 (TF-TG) ENSMUSG00000020684" source="2188" target="1041" cy:directed="1"/>
      <edge id="20616" label="ENSMUSG00000022346 (TF-TG) ENSMUSG00000020712" source="2188" target="2087" cy:directed="1"/>
      <edge id="20615" label="ENSMUSG00000022346 (TF-TG) ENSMUSG00000020717" source="2188" target="1040" cy:directed="1"/>
      <edge id="20614" label="ENSMUSG00000022346 (TF-TG) ENSMUSG00000020732" source="2188" target="1039" cy:directed="1"/>
      <edge id="20613" label="ENSMUSG00000022346 (TF-TG) ENSMUSG00000020741" source="2188" target="2086" cy:directed="1"/>
      <edge id="20612" label="ENSMUSG00000022346 (TF-TG) ENSMUSG00000020788" source="2188" target="2085" cy:directed="1"/>
      <edge id="20611" label="ENSMUSG00000022346 (TF-TG) ENSMUSG00000020808" source="2188" target="1654" cy:directed="1"/>
      <edge id="20610" label="ENSMUSG00000022346 (TF-TG) ENSMUSG00000020814" source="2188" target="2084" cy:directed="1"/>
      <edge id="20609" label="ENSMUSG00000022346 (TF-TG) ENSMUSG00000020846" source="2188" target="2083" cy:directed="1"/>
      <edge id="20608" label="ENSMUSG00000022346 (TF-TG) ENSMUSG00000020873" source="2188" target="2082" cy:directed="1"/>
      <edge id="20607" label="ENSMUSG00000022346 (TF-TG) ENSMUSG00000020886" source="2188" target="1038" cy:directed="1"/>
      <edge id="20606" label="ENSMUSG00000022346 (TF-TG) ENSMUSG00000020894" source="2188" target="1556" cy:directed="1"/>
      <edge id="20605" label="ENSMUSG00000022346 (TF-TG) ENSMUSG00000020897" source="2188" target="2081" cy:directed="1"/>
      <edge id="20604" label="ENSMUSG00000022346 (TF-TG) ENSMUSG00000020900" source="2188" target="1037" cy:directed="1"/>
      <edge id="20603" label="ENSMUSG00000022346 (TF-TG) ENSMUSG00000020901" source="2188" target="2080" cy:directed="1"/>
      <edge id="20602" label="ENSMUSG00000022346 (TF-TG) ENSMUSG00000020914" source="2188" target="2079" cy:directed="1"/>
      <edge id="20601" label="ENSMUSG00000022346 (TF-TG) ENSMUSG00000020953" source="2188" target="1036" cy:directed="1"/>
      <edge id="20600" label="ENSMUSG00000022346 (TF-TG) ENSMUSG00000021013" source="2188" target="1035" cy:directed="1"/>
      <edge id="20599" label="ENSMUSG00000022346 (TF-TG) ENSMUSG00000021061" source="2188" target="1390" cy:directed="1"/>
      <edge id="20598" label="ENSMUSG00000022346 (TF-TG) ENSMUSG00000021115" source="2188" target="2078" cy:directed="1"/>
      <edge id="20597" label="ENSMUSG00000022346 (TF-TG) ENSMUSG00000021123" source="2188" target="1568" cy:directed="1"/>
      <edge id="20596" label="ENSMUSG00000022346 (TF-TG) ENSMUSG00000021136" source="2188" target="1034" cy:directed="1"/>
      <edge id="20595" label="ENSMUSG00000022346 (TF-TG) ENSMUSG00000021175" source="2188" target="1033" cy:directed="1"/>
      <edge id="20594" label="ENSMUSG00000022346 (TF-TG) ENSMUSG00000021194" source="2188" target="1555" cy:directed="1"/>
      <edge id="20593" label="ENSMUSG00000022346 (TF-TG) ENSMUSG00000021198" source="2188" target="1180" cy:directed="1"/>
      <edge id="20592" label="ENSMUSG00000022346 (TF-TG) ENSMUSG00000021221" source="2188" target="2077" cy:directed="1"/>
      <edge id="20591" label="ENSMUSG00000022346 (TF-TG) ENSMUSG00000021223" source="2188" target="2076" cy:directed="1"/>
      <edge id="20590" label="ENSMUSG00000022346 (TF-TG) ENSMUSG00000021256" source="2188" target="1325" cy:directed="1"/>
      <edge id="20589" label="ENSMUSG00000022346 (TF-TG) ENSMUSG00000021265" source="2188" target="1032" cy:directed="1"/>
      <edge id="20588" label="ENSMUSG00000022346 (TF-TG) ENSMUSG00000021281" source="2188" target="1324" cy:directed="1"/>
      <edge id="20587" label="ENSMUSG00000022346 (TF-TG) ENSMUSG00000021303" source="2188" target="1179" cy:directed="1"/>
      <edge id="20586" label="ENSMUSG00000022346 (TF-TG) ENSMUSG00000021337" source="2188" target="1653" cy:directed="1"/>
      <edge id="20585" label="ENSMUSG00000022346 (TF-TG) ENSMUSG00000021364" source="2188" target="1031" cy:directed="1"/>
      <edge id="20584" label="ENSMUSG00000022346 (TF-TG) ENSMUSG00000021391" source="2188" target="2075" cy:directed="1"/>
      <edge id="20583" label="ENSMUSG00000022346 (TF-TG) ENSMUSG00000021396" source="2188" target="1323" cy:directed="1"/>
      <edge id="20582" label="ENSMUSG00000022346 (TF-TG) ENSMUSG00000021403" source="2188" target="1030" cy:directed="1"/>
      <edge id="20581" label="ENSMUSG00000022346 (TF-TG) ENSMUSG00000021453" source="2188" target="2074" cy:directed="1"/>
      <edge id="20580" label="ENSMUSG00000022346 (TF-TG) ENSMUSG00000021509" source="2188" target="1029" cy:directed="1"/>
      <edge id="20579" label="ENSMUSG00000022346 (TF-TG) ENSMUSG00000021539" source="2188" target="1028" cy:directed="1"/>
      <edge id="20578" label="ENSMUSG00000022346 (TF-TG) ENSMUSG00000021559" source="2188" target="1518" cy:directed="1"/>
      <edge id="20577" label="ENSMUSG00000022346 (TF-TG) ENSMUSG00000021572" source="2188" target="1027" cy:directed="1"/>
      <edge id="20576" label="ENSMUSG00000022346 (TF-TG) ENSMUSG00000021587" source="2188" target="1322" cy:directed="1"/>
      <edge id="20575" label="ENSMUSG00000022346 (TF-TG) ENSMUSG00000021604" source="2188" target="1026" cy:directed="1"/>
      <edge id="20574" label="ENSMUSG00000022346 (TF-TG) ENSMUSG00000021684" source="2188" target="1025" cy:directed="1"/>
      <edge id="20573" label="ENSMUSG00000022346 (TF-TG) ENSMUSG00000021685" source="2188" target="1389" cy:directed="1"/>
      <edge id="20572" label="ENSMUSG00000022346 (TF-TG) ENSMUSG00000021700" source="2188" target="1024" cy:directed="1"/>
      <edge id="20571" label="ENSMUSG00000022346 (TF-TG) ENSMUSG00000021720" source="2188" target="1321" cy:directed="1"/>
      <edge id="20570" label="ENSMUSG00000022346 (TF-TG) ENSMUSG00000021725" source="2188" target="2073" cy:directed="1"/>
      <edge id="20569" label="ENSMUSG00000022346 (TF-TG) ENSMUSG00000021728" source="2188" target="2072" cy:directed="1"/>
      <edge id="20568" label="ENSMUSG00000022346 (TF-TG) ENSMUSG00000021730" source="2188" target="1023" cy:directed="1"/>
      <edge id="20567" label="ENSMUSG00000022346 (TF-TG) ENSMUSG00000021831" source="2188" target="2070" cy:directed="1"/>
      <edge id="20566" label="ENSMUSG00000022346 (TF-TG) ENSMUSG00000021835" source="2188" target="1671" cy:directed="1"/>
      <edge id="20565" label="ENSMUSG00000022346 (TF-TG) ENSMUSG00000021838" source="2188" target="1022" cy:directed="1"/>
      <edge id="20564" label="ENSMUSG00000022346 (TF-TG) ENSMUSG00000021846" source="2188" target="1652" cy:directed="1"/>
      <edge id="20563" label="ENSMUSG00000022346 (TF-TG) ENSMUSG00000021876" source="2188" target="2069" cy:directed="1"/>
      <edge id="20562" label="ENSMUSG00000022346 (TF-TG) ENSMUSG00000021904" source="2188" target="1021" cy:directed="1"/>
      <edge id="20561" label="ENSMUSG00000022346 (TF-TG) ENSMUSG00000021986" source="2188" target="1020" cy:directed="1"/>
      <edge id="20560" label="ENSMUSG00000022346 (TF-TG) ENSMUSG00000021999" source="2188" target="1651" cy:directed="1"/>
      <edge id="20559" label="ENSMUSG00000022346 (TF-TG) ENSMUSG00000022003" source="2188" target="2068" cy:directed="1"/>
      <edge id="20558" label="ENSMUSG00000022346 (TF-TG) ENSMUSG00000022018" source="2188" target="1178" cy:directed="1"/>
      <edge id="20557" label="ENSMUSG00000022346 (TF-TG) ENSMUSG00000022026" source="2188" target="1019" cy:directed="1"/>
      <edge id="20556" label="ENSMUSG00000022346 (TF-TG) ENSMUSG00000022033" source="2188" target="1018" cy:directed="1"/>
      <edge id="20555" label="ENSMUSG00000022346 (TF-TG) ENSMUSG00000022034" source="2188" target="1017" cy:directed="1"/>
      <edge id="20554" label="ENSMUSG00000022346 (TF-TG) ENSMUSG00000022136" source="2188" target="2066" cy:directed="1"/>
      <edge id="20553" label="ENSMUSG00000022346 (TF-TG) ENSMUSG00000022148" source="2188" target="2065" cy:directed="1"/>
      <edge id="20552" label="ENSMUSG00000022346 (TF-TG) ENSMUSG00000022177" source="2188" target="2064" cy:directed="1"/>
      <edge id="20551" label="ENSMUSG00000022346 (TF-TG) ENSMUSG00000022208" source="2188" target="1320" cy:directed="1"/>
      <edge id="20550" label="ENSMUSG00000022346 (TF-TG) ENSMUSG00000022211" source="2188" target="1016" cy:directed="1"/>
      <edge id="20549" label="ENSMUSG00000022346 (TF-TG) ENSMUSG00000022253" source="2188" target="2063" cy:directed="1"/>
      <edge id="20548" label="ENSMUSG00000022346 (TF-TG) ENSMUSG00000022332" source="2188" target="1015" cy:directed="1"/>
      <edge id="20547" label="ENSMUSG00000022346 (TF-TG) ENSMUSG00000022346" source="2188" target="2188" cy:directed="1"/>
      <edge id="20546" label="ENSMUSG00000022346 (TF-TG) ENSMUSG00000022360" source="2188" target="2062" cy:directed="1"/>
      <edge id="20545" label="ENSMUSG00000022346 (TF-TG) ENSMUSG00000022385" source="2188" target="2061" cy:directed="1"/>
      <edge id="20544" label="ENSMUSG00000022346 (TF-TG) ENSMUSG00000022422" source="2188" target="1388" cy:directed="1"/>
      <edge id="20543" label="ENSMUSG00000022346 (TF-TG) ENSMUSG00000022436" source="2188" target="2060" cy:directed="1"/>
      <edge id="20542" label="ENSMUSG00000022346 (TF-TG) ENSMUSG00000022456" source="2188" target="1014" cy:directed="1"/>
      <edge id="20541" label="ENSMUSG00000022346 (TF-TG) ENSMUSG00000022479" source="2188" target="2185" cy:directed="1"/>
      <edge id="20540" label="ENSMUSG00000022346 (TF-TG) ENSMUSG00000022489" source="2188" target="1387" cy:directed="1"/>
      <edge id="20539" label="ENSMUSG00000022346 (TF-TG) ENSMUSG00000022505" source="2188" target="1013" cy:directed="1"/>
      <edge id="20538" label="ENSMUSG00000022346 (TF-TG) ENSMUSG00000022512" source="2188" target="1012" cy:directed="1"/>
      <edge id="20537" label="ENSMUSG00000022346 (TF-TG) ENSMUSG00000022519" source="2188" target="2059" cy:directed="1"/>
      <edge id="20536" label="ENSMUSG00000022346 (TF-TG) ENSMUSG00000022528" source="2188" target="2158" cy:directed="1"/>
      <edge id="20535" label="ENSMUSG00000022346 (TF-TG) ENSMUSG00000022537" source="2188" target="1011" cy:directed="1"/>
      <edge id="20534" label="ENSMUSG00000022346 (TF-TG) ENSMUSG00000022598" source="2188" target="1010" cy:directed="1"/>
      <edge id="20533" label="ENSMUSG00000022346 (TF-TG) ENSMUSG00000022619" source="2188" target="2058" cy:directed="1"/>
      <edge id="20532" label="ENSMUSG00000022346 (TF-TG) ENSMUSG00000022673" source="2188" target="2057" cy:directed="1"/>
      <edge id="20531" label="ENSMUSG00000022346 (TF-TG) ENSMUSG00000022696" source="2188" target="1009" cy:directed="1"/>
      <edge id="20530" label="ENSMUSG00000022346 (TF-TG) ENSMUSG00000022748" source="2188" target="2056" cy:directed="1"/>
      <edge id="20529" label="ENSMUSG00000022346 (TF-TG) ENSMUSG00000022762" source="2188" target="2055" cy:directed="1"/>
      <edge id="20528" label="ENSMUSG00000022346 (TF-TG) ENSMUSG00000022769" source="2188" target="1649" cy:directed="1"/>
      <edge id="20527" label="ENSMUSG00000022346 (TF-TG) ENSMUSG00000022773" source="2188" target="1008" cy:directed="1"/>
      <edge id="20526" label="ENSMUSG00000022346 (TF-TG) ENSMUSG00000022829" source="2188" target="1007" cy:directed="1"/>
      <edge id="20525" label="ENSMUSG00000022346 (TF-TG) ENSMUSG00000022840" source="2188" target="1515" cy:directed="1"/>
      <edge id="20524" label="ENSMUSG00000022346 (TF-TG) ENSMUSG00000022844" source="2188" target="1006" cy:directed="1"/>
      <edge id="20523" label="ENSMUSG00000022346 (TF-TG) ENSMUSG00000022857" source="2188" target="1150" cy:directed="1"/>
      <edge id="20522" label="ENSMUSG00000022346 (TF-TG) ENSMUSG00000022864" source="2188" target="2054" cy:directed="1"/>
      <edge id="20521" label="ENSMUSG00000022346 (TF-TG) ENSMUSG00000022881" source="2188" target="1514" cy:directed="1"/>
      <edge id="20520" label="ENSMUSG00000022346 (TF-TG) ENSMUSG00000022900" source="2188" target="2053" cy:directed="1"/>
      <edge id="20519" label="ENSMUSG00000022346 (TF-TG) ENSMUSG00000022912" source="2188" target="2052" cy:directed="1"/>
      <edge id="20518" label="ENSMUSG00000022346 (TF-TG) ENSMUSG00000022941" source="2188" target="1005" cy:directed="1"/>
      <edge id="20517" label="ENSMUSG00000022346 (TF-TG) ENSMUSG00000022945" source="2188" target="2051" cy:directed="1"/>
      <edge id="20516" label="ENSMUSG00000022346 (TF-TG) ENSMUSG00000022978" source="2188" target="1004" cy:directed="1"/>
      <edge id="20515" label="ENSMUSG00000022346 (TF-TG) ENSMUSG00000023004" source="2188" target="2050" cy:directed="1"/>
      <edge id="20514" label="ENSMUSG00000022346 (TF-TG) ENSMUSG00000023008" source="2188" target="2049" cy:directed="1"/>
      <edge id="20513" label="ENSMUSG00000022346 (TF-TG) ENSMUSG00000023009" source="2188" target="2048" cy:directed="1"/>
      <edge id="20512" label="ENSMUSG00000022346 (TF-TG) ENSMUSG00000023015" source="2188" target="2047" cy:directed="1"/>
      <edge id="20511" label="ENSMUSG00000022346 (TF-TG) ENSMUSG00000023017" source="2188" target="2046" cy:directed="1"/>
      <edge id="20510" label="ENSMUSG00000022346 (TF-TG) ENSMUSG00000023032" source="2188" target="2045" cy:directed="1"/>
      <edge id="20509" label="ENSMUSG00000022346 (TF-TG) ENSMUSG00000023050" source="2188" target="1319" cy:directed="1"/>
      <edge id="20508" label="ENSMUSG00000022346 (TF-TG) ENSMUSG00000023066" source="2188" target="1003" cy:directed="1"/>
      <edge id="20507" label="ENSMUSG00000022346 (TF-TG) ENSMUSG00000023092" source="2188" target="1386" cy:directed="1"/>
      <edge id="20506" label="ENSMUSG00000022346 (TF-TG) ENSMUSG00000023191" source="2188" target="1002" cy:directed="1"/>
      <edge id="20505" label="ENSMUSG00000022346 (TF-TG) ENSMUSG00000023216" source="2188" target="1559" cy:directed="1"/>
      <edge id="20504" label="ENSMUSG00000022346 (TF-TG) ENSMUSG00000023224" source="2188" target="2044" cy:directed="1"/>
      <edge id="20503" label="ENSMUSG00000022346 (TF-TG) ENSMUSG00000023247" source="2188" target="1001" cy:directed="1"/>
      <edge id="20502" label="ENSMUSG00000022346 (TF-TG) ENSMUSG00000023272" source="2188" target="2042" cy:directed="1"/>
      <edge id="20501" label="ENSMUSG00000022346 (TF-TG) ENSMUSG00000023387" source="2188" target="1000" cy:directed="1"/>
      <edge id="20500" label="ENSMUSG00000022346 (TF-TG) ENSMUSG00000023393" source="2188" target="1513" cy:directed="1"/>
      <edge id="20499" label="ENSMUSG00000022346 (TF-TG) ENSMUSG00000023473" source="2188" target="1318" cy:directed="1"/>
      <edge id="20498" label="ENSMUSG00000022346 (TF-TG) ENSMUSG00000023827" source="2188" target="1317" cy:directed="1"/>
      <edge id="20497" label="ENSMUSG00000022346 (TF-TG) ENSMUSG00000023886" source="2188" target="999" cy:directed="1"/>
      <edge id="20496" label="ENSMUSG00000022346 (TF-TG) ENSMUSG00000023908" source="2188" target="1316" cy:directed="1"/>
      <edge id="20495" label="ENSMUSG00000022346 (TF-TG) ENSMUSG00000023913" source="2188" target="1647" cy:directed="1"/>
      <edge id="20494" label="ENSMUSG00000022346 (TF-TG) ENSMUSG00000023940" source="2188" target="2041" cy:directed="1"/>
      <edge id="20493" label="ENSMUSG00000022346 (TF-TG) ENSMUSG00000023963" source="2188" target="998" cy:directed="1"/>
      <edge id="20492" label="ENSMUSG00000022346 (TF-TG) ENSMUSG00000023966" source="2188" target="997" cy:directed="1"/>
      <edge id="20491" label="ENSMUSG00000022346 (TF-TG) ENSMUSG00000024013" source="2188" target="1512" cy:directed="1"/>
      <edge id="20490" label="ENSMUSG00000022346 (TF-TG) ENSMUSG00000024028" source="2188" target="996" cy:directed="1"/>
      <edge id="20489" label="ENSMUSG00000022346 (TF-TG) ENSMUSG00000024029" source="2188" target="995" cy:directed="1"/>
      <edge id="20488" label="ENSMUSG00000022346 (TF-TG) ENSMUSG00000024030" source="2188" target="1511" cy:directed="1"/>
      <edge id="20487" label="ENSMUSG00000022346 (TF-TG) ENSMUSG00000024033" source="2188" target="1646" cy:directed="1"/>
      <edge id="20486" label="ENSMUSG00000022346 (TF-TG) ENSMUSG00000024063" source="2188" target="2040" cy:directed="1"/>
      <edge id="20485" label="ENSMUSG00000022346 (TF-TG) ENSMUSG00000024074" source="2188" target="994" cy:directed="1"/>
      <edge id="20484" label="ENSMUSG00000022346 (TF-TG) ENSMUSG00000024112" source="2188" target="993" cy:directed="1"/>
      <edge id="20483" label="ENSMUSG00000022346 (TF-TG) ENSMUSG00000024151" source="2188" target="1149" cy:directed="1"/>
      <edge id="20482" label="ENSMUSG00000022346 (TF-TG) ENSMUSG00000024175" source="2188" target="1177" cy:directed="1"/>
      <edge id="20481" label="ENSMUSG00000022346 (TF-TG) ENSMUSG00000024177" source="2188" target="992" cy:directed="1"/>
      <edge id="20480" label="ENSMUSG00000022346 (TF-TG) ENSMUSG00000024193" source="2188" target="2039" cy:directed="1"/>
      <edge id="20479" label="ENSMUSG00000022346 (TF-TG) ENSMUSG00000024215" source="2188" target="991" cy:directed="1"/>
      <edge id="20478" label="ENSMUSG00000022346 (TF-TG) ENSMUSG00000024225" source="2188" target="990" cy:directed="1"/>
      <edge id="20477" label="ENSMUSG00000022346 (TF-TG) ENSMUSG00000024232" source="2188" target="2038" cy:directed="1"/>
      <edge id="20476" label="ENSMUSG00000022346 (TF-TG) ENSMUSG00000024299" source="2188" target="2037" cy:directed="1"/>
      <edge id="20475" label="ENSMUSG00000022346 (TF-TG) ENSMUSG00000024301" source="2188" target="2036" cy:directed="1"/>
      <edge id="20474" label="ENSMUSG00000022346 (TF-TG) ENSMUSG00000024302" source="2188" target="989" cy:directed="1"/>
      <edge id="20473" label="ENSMUSG00000022346 (TF-TG) ENSMUSG00000024304" source="2188" target="988" cy:directed="1"/>
      <edge id="20472" label="ENSMUSG00000022346 (TF-TG) ENSMUSG00000024352" source="2188" target="987" cy:directed="1"/>
      <edge id="20471" label="ENSMUSG00000022346 (TF-TG) ENSMUSG00000024366" source="2188" target="1385" cy:directed="1"/>
      <edge id="20470" label="ENSMUSG00000022346 (TF-TG) ENSMUSG00000024386" source="2188" target="986" cy:directed="1"/>
      <edge id="20469" label="ENSMUSG00000022346 (TF-TG) ENSMUSG00000024411" source="2188" target="985" cy:directed="1"/>
      <edge id="20468" label="ENSMUSG00000022346 (TF-TG) ENSMUSG00000024423" source="2188" target="1510" cy:directed="1"/>
      <edge id="20467" label="ENSMUSG00000022346 (TF-TG) ENSMUSG00000024431" source="2188" target="2182" cy:directed="1"/>
      <edge id="20466" label="ENSMUSG00000022346 (TF-TG) ENSMUSG00000024501" source="2188" target="984" cy:directed="1"/>
      <edge id="20465" label="ENSMUSG00000022346 (TF-TG) ENSMUSG00000024511" source="2188" target="983" cy:directed="1"/>
      <edge id="20464" label="ENSMUSG00000022346 (TF-TG) ENSMUSG00000024512" source="2188" target="982" cy:directed="1"/>
      <edge id="20463" label="ENSMUSG00000022346 (TF-TG) ENSMUSG00000024516" source="2188" target="2035" cy:directed="1"/>
      <edge id="20462" label="ENSMUSG00000022346 (TF-TG) ENSMUSG00000024525" source="2188" target="2034" cy:directed="1"/>
      <edge id="20461" label="ENSMUSG00000022346 (TF-TG) ENSMUSG00000024533" source="2188" target="1384" cy:directed="1"/>
      <edge id="20460" label="ENSMUSG00000022346 (TF-TG) ENSMUSG00000024542" source="2188" target="2033" cy:directed="1"/>
      <edge id="20459" label="ENSMUSG00000022346 (TF-TG) ENSMUSG00000024548" source="2188" target="981" cy:directed="1"/>
      <edge id="20458" label="ENSMUSG00000022346 (TF-TG) ENSMUSG00000024552" source="2188" target="1645" cy:directed="1"/>
      <edge id="20457" label="ENSMUSG00000022346 (TF-TG) ENSMUSG00000024553" source="2188" target="980" cy:directed="1"/>
      <edge id="20456" label="ENSMUSG00000022346 (TF-TG) ENSMUSG00000024575" source="2188" target="2032" cy:directed="1"/>
      <edge id="20455" label="ENSMUSG00000022346 (TF-TG) ENSMUSG00000024590" source="2188" target="2178" cy:directed="1"/>
      <edge id="20454" label="ENSMUSG00000022346 (TF-TG) ENSMUSG00000024597" source="2188" target="2031" cy:directed="1"/>
      <edge id="20453" label="ENSMUSG00000022346 (TF-TG) ENSMUSG00000024613" source="2188" target="1315" cy:directed="1"/>
      <edge id="20452" label="ENSMUSG00000022346 (TF-TG) ENSMUSG00000024621" source="2188" target="1314" cy:directed="1"/>
      <edge id="20451" label="ENSMUSG00000022346 (TF-TG) ENSMUSG00000024644" source="2188" target="2030" cy:directed="1"/>
      <edge id="20450" label="ENSMUSG00000022346 (TF-TG) ENSMUSG00000024646" source="2188" target="1313" cy:directed="1"/>
      <edge id="20449" label="ENSMUSG00000022346 (TF-TG) ENSMUSG00000024743" source="2188" target="1383" cy:directed="1"/>
      <edge id="20448" label="ENSMUSG00000022346 (TF-TG) ENSMUSG00000024774" source="2188" target="2029" cy:directed="1"/>
      <edge id="20447" label="ENSMUSG00000022346 (TF-TG) ENSMUSG00000024777" source="2188" target="2028" cy:directed="1"/>
      <edge id="20446" label="ENSMUSG00000022346 (TF-TG) ENSMUSG00000024795" source="2188" target="2027" cy:directed="1"/>
      <edge id="20445" label="ENSMUSG00000022346 (TF-TG) ENSMUSG00000024807" source="2188" target="1509" cy:directed="1"/>
      <edge id="20444" label="ENSMUSG00000022346 (TF-TG) ENSMUSG00000024810" source="2188" target="1312" cy:directed="1"/>
      <edge id="20443" label="ENSMUSG00000022346 (TF-TG) ENSMUSG00000024858" source="2188" target="2026" cy:directed="1"/>
      <edge id="20442" label="ENSMUSG00000022346 (TF-TG) ENSMUSG00000024873" source="2188" target="979" cy:directed="1"/>
      <edge id="20441" label="ENSMUSG00000022346 (TF-TG) ENSMUSG00000024891" source="2188" target="2025" cy:directed="1"/>
      <edge id="20440" label="ENSMUSG00000022346 (TF-TG) ENSMUSG00000024897" source="2188" target="1176" cy:directed="1"/>
      <edge id="20439" label="ENSMUSG00000022346 (TF-TG) ENSMUSG00000024901" source="2188" target="1311" cy:directed="1"/>
      <edge id="20438" label="ENSMUSG00000022346 (TF-TG) ENSMUSG00000024905" source="2188" target="978" cy:directed="1"/>
      <edge id="20437" label="ENSMUSG00000022346 (TF-TG) ENSMUSG00000024912" source="2188" target="977" cy:directed="1"/>
      <edge id="20436" label="ENSMUSG00000022346 (TF-TG) ENSMUSG00000024935" source="2188" target="1507" cy:directed="1"/>
      <edge id="20435" label="ENSMUSG00000022346 (TF-TG) ENSMUSG00000024972" source="2188" target="976" cy:directed="1"/>
      <edge id="20434" label="ENSMUSG00000022346 (TF-TG) ENSMUSG00000024978" source="2188" target="2024" cy:directed="1"/>
      <edge id="20433" label="ENSMUSG00000022346 (TF-TG) ENSMUSG00000024989" source="2188" target="2023" cy:directed="1"/>
      <edge id="20432" label="ENSMUSG00000022346 (TF-TG) ENSMUSG00000025001" source="2188" target="2022" cy:directed="1"/>
      <edge id="20431" label="ENSMUSG00000022346 (TF-TG) ENSMUSG00000025002" source="2188" target="975" cy:directed="1"/>
      <edge id="20430" label="ENSMUSG00000022346 (TF-TG) ENSMUSG00000025019" source="2188" target="2021" cy:directed="1"/>
      <edge id="20429" label="ENSMUSG00000022346 (TF-TG) ENSMUSG00000025020" source="2188" target="974" cy:directed="1"/>
      <edge id="20428" label="ENSMUSG00000022346 (TF-TG) ENSMUSG00000025026" source="2188" target="973" cy:directed="1"/>
      <edge id="20427" label="ENSMUSG00000022346 (TF-TG) ENSMUSG00000025059" source="2188" target="1310" cy:directed="1"/>
      <edge id="20426" label="ENSMUSG00000022346 (TF-TG) ENSMUSG00000025064" source="2188" target="1644" cy:directed="1"/>
      <edge id="20425" label="ENSMUSG00000022346 (TF-TG) ENSMUSG00000025075" source="2188" target="972" cy:directed="1"/>
      <edge id="20424" label="ENSMUSG00000022346 (TF-TG) ENSMUSG00000025085" source="2188" target="971" cy:directed="1"/>
      <edge id="20423" label="ENSMUSG00000022346 (TF-TG) ENSMUSG00000025089" source="2188" target="970" cy:directed="1"/>
      <edge id="20422" label="ENSMUSG00000022346 (TF-TG) ENSMUSG00000025151" source="2188" target="1506" cy:directed="1"/>
      <edge id="20421" label="ENSMUSG00000022346 (TF-TG) ENSMUSG00000025154" source="2188" target="2020" cy:directed="1"/>
      <edge id="20420" label="ENSMUSG00000022346 (TF-TG) ENSMUSG00000025175" source="2188" target="969" cy:directed="1"/>
      <edge id="20419" label="ENSMUSG00000022346 (TF-TG) ENSMUSG00000025265" source="2188" target="968" cy:directed="1"/>
      <edge id="20418" label="ENSMUSG00000022346 (TF-TG) ENSMUSG00000025268" source="2188" target="967" cy:directed="1"/>
      <edge id="20417" label="ENSMUSG00000022346 (TF-TG) ENSMUSG00000025329" source="2188" target="966" cy:directed="1"/>
      <edge id="20416" label="ENSMUSG00000022346 (TF-TG) ENSMUSG00000025347" source="2188" target="965" cy:directed="1"/>
      <edge id="20415" label="ENSMUSG00000022346 (TF-TG) ENSMUSG00000025351" source="2188" target="2019" cy:directed="1"/>
      <edge id="20414" label="ENSMUSG00000022346 (TF-TG) ENSMUSG00000025352" source="2188" target="2018" cy:directed="1"/>
      <edge id="20413" label="ENSMUSG00000022346 (TF-TG) ENSMUSG00000025395" source="2188" target="964" cy:directed="1"/>
      <edge id="20412" label="ENSMUSG00000022346 (TF-TG) ENSMUSG00000025405" source="2188" target="963" cy:directed="1"/>
      <edge id="20411" label="ENSMUSG00000022346 (TF-TG) ENSMUSG00000025432" source="2188" target="962" cy:directed="1"/>
      <edge id="20410" label="ENSMUSG00000022346 (TF-TG) ENSMUSG00000025479" source="2188" target="961" cy:directed="1"/>
      <edge id="20409" label="ENSMUSG00000022346 (TF-TG) ENSMUSG00000025492" source="2188" target="1309" cy:directed="1"/>
      <edge id="20408" label="ENSMUSG00000022346 (TF-TG) ENSMUSG00000025507" source="2188" target="1308" cy:directed="1"/>
      <edge id="20407" label="ENSMUSG00000022346 (TF-TG) ENSMUSG00000025515" source="2188" target="960" cy:directed="1"/>
      <edge id="20406" label="ENSMUSG00000022346 (TF-TG) ENSMUSG00000025551" source="2188" target="1642" cy:directed="1"/>
      <edge id="20405" label="ENSMUSG00000022346 (TF-TG) ENSMUSG00000025576" source="2188" target="2017" cy:directed="1"/>
      <edge id="20404" label="ENSMUSG00000022346 (TF-TG) ENSMUSG00000025582" source="2188" target="959" cy:directed="1"/>
      <edge id="20403" label="ENSMUSG00000022346 (TF-TG) ENSMUSG00000025584" source="2188" target="2016" cy:directed="1"/>
      <edge id="20402" label="ENSMUSG00000022346 (TF-TG) ENSMUSG00000025602" source="2188" target="958" cy:directed="1"/>
      <edge id="20401" label="ENSMUSG00000022346 (TF-TG) ENSMUSG00000025608" source="2188" target="957" cy:directed="1"/>
      <edge id="20400" label="ENSMUSG00000022346 (TF-TG) ENSMUSG00000025658" source="2188" target="956" cy:directed="1"/>
      <edge id="20399" label="ENSMUSG00000022346 (TF-TG) ENSMUSG00000025701" source="2188" target="955" cy:directed="1"/>
      <edge id="20398" label="ENSMUSG00000022346 (TF-TG) ENSMUSG00000025739" source="2188" target="954" cy:directed="1"/>
      <edge id="20397" label="ENSMUSG00000022346 (TF-TG) ENSMUSG00000025742" source="2188" target="1504" cy:directed="1"/>
      <edge id="20396" label="ENSMUSG00000022346 (TF-TG) ENSMUSG00000025758" source="2188" target="2015" cy:directed="1"/>
      <edge id="20395" label="ENSMUSG00000022346 (TF-TG) ENSMUSG00000025810" source="2188" target="1307" cy:directed="1"/>
      <edge id="20394" label="ENSMUSG00000022346 (TF-TG) ENSMUSG00000025867" source="2188" target="953" cy:directed="1"/>
      <edge id="20393" label="ENSMUSG00000022346 (TF-TG) ENSMUSG00000025876" source="2188" target="1175" cy:directed="1"/>
      <edge id="20392" label="ENSMUSG00000022346 (TF-TG) ENSMUSG00000025912" source="2188" target="2014" cy:directed="1"/>
      <edge id="20391" label="ENSMUSG00000022346 (TF-TG) ENSMUSG00000025938" source="2188" target="1567" cy:directed="1"/>
      <edge id="20390" label="ENSMUSG00000022346 (TF-TG) ENSMUSG00000025969" source="2188" target="1566" cy:directed="1"/>
      <edge id="20389" label="ENSMUSG00000022346 (TF-TG) ENSMUSG00000025991" source="2188" target="952" cy:directed="1"/>
      <edge id="20388" label="ENSMUSG00000022346 (TF-TG) ENSMUSG00000026072" source="2188" target="1305" cy:directed="1"/>
      <edge id="20387" label="ENSMUSG00000022346 (TF-TG) ENSMUSG00000026102" source="2188" target="1304" cy:directed="1"/>
      <edge id="20386" label="ENSMUSG00000022346 (TF-TG) ENSMUSG00000026131" source="2188" target="951" cy:directed="1"/>
      <edge id="20385" label="ENSMUSG00000022346 (TF-TG) ENSMUSG00000026163" source="2188" target="950" cy:directed="1"/>
      <edge id="20384" label="ENSMUSG00000022346 (TF-TG) ENSMUSG00000026196" source="2188" target="2013" cy:directed="1"/>
      <edge id="20383" label="ENSMUSG00000022346 (TF-TG) ENSMUSG00000026255" source="2188" target="949" cy:directed="1"/>
      <edge id="20382" label="ENSMUSG00000022346 (TF-TG) ENSMUSG00000026272" source="2188" target="1148" cy:directed="1"/>
      <edge id="20381" label="ENSMUSG00000022346 (TF-TG) ENSMUSG00000026281" source="2188" target="2012" cy:directed="1"/>
      <edge id="20380" label="ENSMUSG00000022346 (TF-TG) ENSMUSG00000026288" source="2188" target="948" cy:directed="1"/>
      <edge id="20379" label="ENSMUSG00000022346 (TF-TG) ENSMUSG00000026303" source="2188" target="947" cy:directed="1"/>
      <edge id="20378" label="ENSMUSG00000022346 (TF-TG) ENSMUSG00000026321" source="2188" target="946" cy:directed="1"/>
      <edge id="20377" label="ENSMUSG00000022346 (TF-TG) ENSMUSG00000026322" source="2188" target="945" cy:directed="1"/>
      <edge id="20376" label="ENSMUSG00000022346 (TF-TG) ENSMUSG00000026335" source="2188" target="1641" cy:directed="1"/>
      <edge id="20375" label="ENSMUSG00000022346 (TF-TG) ENSMUSG00000026347" source="2188" target="944" cy:directed="1"/>
      <edge id="20374" label="ENSMUSG00000022346 (TF-TG) ENSMUSG00000026355" source="2188" target="1502" cy:directed="1"/>
      <edge id="20373" label="ENSMUSG00000022346 (TF-TG) ENSMUSG00000026360" source="2188" target="2011" cy:directed="1"/>
      <edge id="20372" label="ENSMUSG00000022346 (TF-TG) ENSMUSG00000026380" source="2188" target="1501" cy:directed="1"/>
      <edge id="20371" label="ENSMUSG00000022346 (TF-TG) ENSMUSG00000026398" source="2188" target="2154" cy:directed="1"/>
      <edge id="20370" label="ENSMUSG00000022346 (TF-TG) ENSMUSG00000026429" source="2188" target="2010" cy:directed="1"/>
      <edge id="20369" label="ENSMUSG00000022346 (TF-TG) ENSMUSG00000026430" source="2188" target="1500" cy:directed="1"/>
      <edge id="20368" label="ENSMUSG00000022346 (TF-TG) ENSMUSG00000026442" source="2188" target="943" cy:directed="1"/>
      <edge id="20367" label="ENSMUSG00000022346 (TF-TG) ENSMUSG00000026443" source="2188" target="1640" cy:directed="1"/>
      <edge id="20366" label="ENSMUSG00000022346 (TF-TG) ENSMUSG00000026475" source="2188" target="942" cy:directed="1"/>
      <edge id="20365" label="ENSMUSG00000022346 (TF-TG) ENSMUSG00000026480" source="2188" target="1499" cy:directed="1"/>
      <edge id="20364" label="ENSMUSG00000022346 (TF-TG) ENSMUSG00000026482" source="2188" target="941" cy:directed="1"/>
      <edge id="20363" label="ENSMUSG00000022346 (TF-TG) ENSMUSG00000026483" source="2188" target="940" cy:directed="1"/>
      <edge id="20362" label="ENSMUSG00000022346 (TF-TG) ENSMUSG00000026504" source="2188" target="2009" cy:directed="1"/>
      <edge id="20361" label="ENSMUSG00000022346 (TF-TG) ENSMUSG00000026509" source="2188" target="2008" cy:directed="1"/>
      <edge id="20360" label="ENSMUSG00000022346 (TF-TG) ENSMUSG00000026520" source="2188" target="939" cy:directed="1"/>
      <edge id="20359" label="ENSMUSG00000022346 (TF-TG) ENSMUSG00000026527" source="2188" target="1382" cy:directed="1"/>
      <edge id="20358" label="ENSMUSG00000022346 (TF-TG) ENSMUSG00000026546" source="2188" target="2007" cy:directed="1"/>
      <edge id="20357" label="ENSMUSG00000022346 (TF-TG) ENSMUSG00000026565" source="2188" target="2179" cy:directed="1"/>
      <edge id="20356" label="ENSMUSG00000022346 (TF-TG) ENSMUSG00000026605" source="2188" target="2006" cy:directed="1"/>
      <edge id="20355" label="ENSMUSG00000022346 (TF-TG) ENSMUSG00000026610" source="2188" target="938" cy:directed="1"/>
      <edge id="20354" label="ENSMUSG00000022346 (TF-TG) ENSMUSG00000026620" source="2188" target="937" cy:directed="1"/>
      <edge id="20353" label="ENSMUSG00000022346 (TF-TG) ENSMUSG00000026646" source="2188" target="1303" cy:directed="1"/>
      <edge id="20352" label="ENSMUSG00000022346 (TF-TG) ENSMUSG00000026657" source="2188" target="1302" cy:directed="1"/>
      <edge id="20351" label="ENSMUSG00000022346 (TF-TG) ENSMUSG00000026669" source="2188" target="1498" cy:directed="1"/>
      <edge id="20350" label="ENSMUSG00000022346 (TF-TG) ENSMUSG00000026683" source="2188" target="2005" cy:directed="1"/>
      <edge id="20349" label="ENSMUSG00000022346 (TF-TG) ENSMUSG00000026686" source="2188" target="936" cy:directed="1"/>
      <edge id="20348" label="ENSMUSG00000022346 (TF-TG) ENSMUSG00000026700" source="2188" target="1301" cy:directed="1"/>
      <edge id="20347" label="ENSMUSG00000022346 (TF-TG) ENSMUSG00000026726" source="2188" target="935" cy:directed="1"/>
      <edge id="20346" label="ENSMUSG00000022346 (TF-TG) ENSMUSG00000026728" source="2188" target="2004" cy:directed="1"/>
      <edge id="20345" label="ENSMUSG00000022346 (TF-TG) ENSMUSG00000026737" source="2188" target="934" cy:directed="1"/>
      <edge id="20344" label="ENSMUSG00000022346 (TF-TG) ENSMUSG00000026764" source="2188" target="1639" cy:directed="1"/>
      <edge id="20343" label="ENSMUSG00000022346 (TF-TG) ENSMUSG00000026765" source="2188" target="933" cy:directed="1"/>
      <edge id="20342" label="ENSMUSG00000022346 (TF-TG) ENSMUSG00000026779" source="2188" target="2003" cy:directed="1"/>
      <edge id="20341" label="ENSMUSG00000022346 (TF-TG) ENSMUSG00000026782" source="2188" target="932" cy:directed="1"/>
      <edge id="20340" label="ENSMUSG00000022346 (TF-TG) ENSMUSG00000026785" source="2188" target="2002" cy:directed="1"/>
      <edge id="20339" label="ENSMUSG00000022346 (TF-TG) ENSMUSG00000026786" source="2188" target="2001" cy:directed="1"/>
      <edge id="20338" label="ENSMUSG00000022346 (TF-TG) ENSMUSG00000026815" source="2188" target="1300" cy:directed="1"/>
      <edge id="20337" label="ENSMUSG00000022346 (TF-TG) ENSMUSG00000026828" source="2188" target="931" cy:directed="1"/>
      <edge id="20336" label="ENSMUSG00000022346 (TF-TG) ENSMUSG00000026833" source="2188" target="1565" cy:directed="1"/>
      <edge id="20335" label="ENSMUSG00000022346 (TF-TG) ENSMUSG00000026864" source="2188" target="1497" cy:directed="1"/>
      <edge id="20334" label="ENSMUSG00000022346 (TF-TG) ENSMUSG00000026879" source="2188" target="2000" cy:directed="1"/>
      <edge id="20333" label="ENSMUSG00000022346 (TF-TG) ENSMUSG00000026921" source="2188" target="1999" cy:directed="1"/>
      <edge id="20332" label="ENSMUSG00000022346 (TF-TG) ENSMUSG00000026923" source="2188" target="2177" cy:directed="1"/>
      <edge id="20331" label="ENSMUSG00000022346 (TF-TG) ENSMUSG00000026930" source="2188" target="1496" cy:directed="1"/>
      <edge id="20330" label="ENSMUSG00000022346 (TF-TG) ENSMUSG00000026955" source="2188" target="1299" cy:directed="1"/>
      <edge id="20329" label="ENSMUSG00000022346 (TF-TG) ENSMUSG00000026959" source="2188" target="1381" cy:directed="1"/>
      <edge id="20328" label="ENSMUSG00000022346 (TF-TG) ENSMUSG00000027006" source="2188" target="1998" cy:directed="1"/>
      <edge id="20327" label="ENSMUSG00000022346 (TF-TG) ENSMUSG00000027009" source="2188" target="1997" cy:directed="1"/>
      <edge id="20326" label="ENSMUSG00000022346 (TF-TG) ENSMUSG00000027018" source="2188" target="1495" cy:directed="1"/>
      <edge id="20325" label="ENSMUSG00000022346 (TF-TG) ENSMUSG00000027074" source="2188" target="930" cy:directed="1"/>
      <edge id="20324" label="ENSMUSG00000022346 (TF-TG) ENSMUSG00000027075" source="2188" target="1996" cy:directed="1"/>
      <edge id="20323" label="ENSMUSG00000022346 (TF-TG) ENSMUSG00000027203" source="2188" target="929" cy:directed="1"/>
      <edge id="20322" label="ENSMUSG00000022346 (TF-TG) ENSMUSG00000027230" source="2188" target="1995" cy:directed="1"/>
      <edge id="20321" label="ENSMUSG00000022346 (TF-TG) ENSMUSG00000027249" source="2188" target="1993" cy:directed="1"/>
      <edge id="20320" label="ENSMUSG00000022346 (TF-TG) ENSMUSG00000027254" source="2188" target="1637" cy:directed="1"/>
      <edge id="20319" label="ENSMUSG00000022346 (TF-TG) ENSMUSG00000027273" source="2188" target="1636" cy:directed="1"/>
      <edge id="20318" label="ENSMUSG00000022346 (TF-TG) ENSMUSG00000027323" source="2188" target="2194" cy:directed="1"/>
      <edge id="20317" label="ENSMUSG00000022346 (TF-TG) ENSMUSG00000027326" source="2188" target="1992" cy:directed="1"/>
      <edge id="20316" label="ENSMUSG00000022346 (TF-TG) ENSMUSG00000027346" source="2188" target="1494" cy:directed="1"/>
      <edge id="20315" label="ENSMUSG00000022346 (TF-TG) ENSMUSG00000027360" source="2188" target="928" cy:directed="1"/>
      <edge id="20314" label="ENSMUSG00000022346 (TF-TG) ENSMUSG00000027375" source="2188" target="1298" cy:directed="1"/>
      <edge id="20313" label="ENSMUSG00000022346 (TF-TG) ENSMUSG00000027379" source="2188" target="927" cy:directed="1"/>
      <edge id="20312" label="ENSMUSG00000022346 (TF-TG) ENSMUSG00000027420" source="2188" target="1493" cy:directed="1"/>
      <edge id="20311" label="ENSMUSG00000022346 (TF-TG) ENSMUSG00000027435" source="2188" target="1492" cy:directed="1"/>
      <edge id="20310" label="ENSMUSG00000022346 (TF-TG) ENSMUSG00000027454" source="2188" target="1991" cy:directed="1"/>
      <edge id="20309" label="ENSMUSG00000022346 (TF-TG) ENSMUSG00000027456" source="2188" target="1491" cy:directed="1"/>
      <edge id="20308" label="ENSMUSG00000022346 (TF-TG) ENSMUSG00000027469" source="2188" target="1990" cy:directed="1"/>
      <edge id="20307" label="ENSMUSG00000022346 (TF-TG) ENSMUSG00000027499" source="2188" target="1490" cy:directed="1"/>
      <edge id="20306" label="ENSMUSG00000022346 (TF-TG) ENSMUSG00000027513" source="2188" target="1989" cy:directed="1"/>
      <edge id="20305" label="ENSMUSG00000022346 (TF-TG) ENSMUSG00000027514" source="2188" target="1988" cy:directed="1"/>
      <edge id="20304" label="ENSMUSG00000022346 (TF-TG) ENSMUSG00000027533" source="2188" target="1987" cy:directed="1"/>
      <edge id="20303" label="ENSMUSG00000022346 (TF-TG) ENSMUSG00000027544" source="2188" target="1635" cy:directed="1"/>
      <edge id="20302" label="ENSMUSG00000022346 (TF-TG) ENSMUSG00000027581" source="2188" target="926" cy:directed="1"/>
      <edge id="20301" label="ENSMUSG00000022346 (TF-TG) ENSMUSG00000027602" source="2188" target="2167" cy:directed="1"/>
      <edge id="20300" label="ENSMUSG00000022346 (TF-TG) ENSMUSG00000027611" source="2188" target="1986" cy:directed="1"/>
      <edge id="20299" label="ENSMUSG00000022346 (TF-TG) ENSMUSG00000027612" source="2188" target="925" cy:directed="1"/>
      <edge id="20298" label="ENSMUSG00000022346 (TF-TG) ENSMUSG00000027635" source="2188" target="924" cy:directed="1"/>
      <edge id="20297" label="ENSMUSG00000022346 (TF-TG) ENSMUSG00000027641" source="2188" target="2166" cy:directed="1"/>
      <edge id="20296" label="ENSMUSG00000022346 (TF-TG) ENSMUSG00000027654" source="2188" target="1985" cy:directed="1"/>
      <edge id="20295" label="ENSMUSG00000022346 (TF-TG) ENSMUSG00000027661" source="2188" target="1489" cy:directed="1"/>
      <edge id="20294" label="ENSMUSG00000022346 (TF-TG) ENSMUSG00000027674" source="2188" target="923" cy:directed="1"/>
      <edge id="20293" label="ENSMUSG00000022346 (TF-TG) ENSMUSG00000027684" source="2188" target="922" cy:directed="1"/>
      <edge id="20292" label="ENSMUSG00000022346 (TF-TG) ENSMUSG00000027715" source="2188" target="2165" cy:directed="1"/>
      <edge id="20291" label="ENSMUSG00000022346 (TF-TG) ENSMUSG00000027748" source="2188" target="921" cy:directed="1"/>
      <edge id="20290" label="ENSMUSG00000022346 (TF-TG) ENSMUSG00000027750" source="2188" target="1297" cy:directed="1"/>
      <edge id="20289" label="ENSMUSG00000022346 (TF-TG) ENSMUSG00000027752" source="2188" target="1984" cy:directed="1"/>
      <edge id="20288" label="ENSMUSG00000022346 (TF-TG) ENSMUSG00000027763" source="2188" target="1983" cy:directed="1"/>
      <edge id="20287" label="ENSMUSG00000022346 (TF-TG) ENSMUSG00000027797" source="2188" target="920" cy:directed="1"/>
      <edge id="20286" label="ENSMUSG00000022346 (TF-TG) ENSMUSG00000027801" source="2188" target="919" cy:directed="1"/>
      <edge id="20285" label="ENSMUSG00000022346 (TF-TG) ENSMUSG00000027834" source="2188" target="1982" cy:directed="1"/>
      <edge id="20284" label="ENSMUSG00000022346 (TF-TG) ENSMUSG00000027876" source="2188" target="918" cy:directed="1"/>
      <edge id="20283" label="ENSMUSG00000022346 (TF-TG) ENSMUSG00000027878" source="2188" target="1981" cy:directed="1"/>
      <edge id="20282" label="ENSMUSG00000022346 (TF-TG) ENSMUSG00000027890" source="2188" target="1296" cy:directed="1"/>
      <edge id="20281" label="ENSMUSG00000022346 (TF-TG) ENSMUSG00000027931" source="2188" target="1295" cy:directed="1"/>
      <edge id="20280" label="ENSMUSG00000022346 (TF-TG) ENSMUSG00000027994" source="2188" target="1980" cy:directed="1"/>
      <edge id="20279" label="ENSMUSG00000022346 (TF-TG) ENSMUSG00000028008" source="2188" target="917" cy:directed="1"/>
      <edge id="20278" label="ENSMUSG00000022346 (TF-TG) ENSMUSG00000028019" source="2188" target="916" cy:directed="1"/>
      <edge id="20277" label="ENSMUSG00000022346 (TF-TG) ENSMUSG00000028039" source="2188" target="915" cy:directed="1"/>
      <edge id="20276" label="ENSMUSG00000022346 (TF-TG) ENSMUSG00000028057" source="2188" target="1293" cy:directed="1"/>
      <edge id="20275" label="ENSMUSG00000022346 (TF-TG) ENSMUSG00000028068" source="2188" target="914" cy:directed="1"/>
      <edge id="20274" label="ENSMUSG00000022346 (TF-TG) ENSMUSG00000028076" source="2188" target="1292" cy:directed="1"/>
      <edge id="20273" label="ENSMUSG00000022346 (TF-TG) ENSMUSG00000028088" source="2188" target="913" cy:directed="1"/>
      <edge id="20272" label="ENSMUSG00000022346 (TF-TG) ENSMUSG00000028111" source="2188" target="912" cy:directed="1"/>
      <edge id="20271" label="ENSMUSG00000022346 (TF-TG) ENSMUSG00000028186" source="2188" target="1634" cy:directed="1"/>
      <edge id="20270" label="ENSMUSG00000022346 (TF-TG) ENSMUSG00000028212" source="2188" target="1979" cy:directed="1"/>
      <edge id="20269" label="ENSMUSG00000022346 (TF-TG) ENSMUSG00000028226" source="2188" target="911" cy:directed="1"/>
      <edge id="20268" label="ENSMUSG00000022346 (TF-TG) ENSMUSG00000028236" source="2188" target="910" cy:directed="1"/>
      <edge id="20267" label="ENSMUSG00000022346 (TF-TG) ENSMUSG00000028255" source="2188" target="909" cy:directed="1"/>
      <edge id="20266" label="ENSMUSG00000022346 (TF-TG) ENSMUSG00000028282" source="2188" target="1978" cy:directed="1"/>
      <edge id="20265" label="ENSMUSG00000022346 (TF-TG) ENSMUSG00000028289" source="2188" target="908" cy:directed="1"/>
      <edge id="20264" label="ENSMUSG00000022346 (TF-TG) ENSMUSG00000028312" source="2188" target="1977" cy:directed="1"/>
      <edge id="20263" label="ENSMUSG00000022346 (TF-TG) ENSMUSG00000028341" source="2188" target="1976" cy:directed="1"/>
      <edge id="20262" label="ENSMUSG00000022346 (TF-TG) ENSMUSG00000028356" source="2188" target="907" cy:directed="1"/>
      <edge id="20261" label="ENSMUSG00000022346 (TF-TG) ENSMUSG00000028389" source="2188" target="906" cy:directed="1"/>
      <edge id="20260" label="ENSMUSG00000022346 (TF-TG) ENSMUSG00000028391" source="2188" target="905" cy:directed="1"/>
      <edge id="20259" label="ENSMUSG00000022346 (TF-TG) ENSMUSG00000028403" source="2188" target="1291" cy:directed="1"/>
      <edge id="20258" label="ENSMUSG00000022346 (TF-TG) ENSMUSG00000028415" source="2188" target="904" cy:directed="1"/>
      <edge id="20257" label="ENSMUSG00000022346 (TF-TG) ENSMUSG00000028427" source="2188" target="903" cy:directed="1"/>
      <edge id="20256" label="ENSMUSG00000022346 (TF-TG) ENSMUSG00000028439" source="2188" target="1975" cy:directed="1"/>
      <edge id="20255" label="ENSMUSG00000022346 (TF-TG) ENSMUSG00000028444" source="2188" target="902" cy:directed="1"/>
      <edge id="20254" label="ENSMUSG00000022346 (TF-TG) ENSMUSG00000028457" source="2188" target="901" cy:directed="1"/>
      <edge id="20253" label="ENSMUSG00000022346 (TF-TG) ENSMUSG00000028527" source="2188" target="1147" cy:directed="1"/>
      <edge id="20252" label="ENSMUSG00000022346 (TF-TG) ENSMUSG00000028532" source="2188" target="900" cy:directed="1"/>
      <edge id="20251" label="ENSMUSG00000022346 (TF-TG) ENSMUSG00000028539" source="2188" target="899" cy:directed="1"/>
      <edge id="20250" label="ENSMUSG00000022346 (TF-TG) ENSMUSG00000028551" source="2188" target="1290" cy:directed="1"/>
      <edge id="20249" label="ENSMUSG00000022346 (TF-TG) ENSMUSG00000028555" source="2188" target="898" cy:directed="1"/>
      <edge id="20248" label="ENSMUSG00000022346 (TF-TG) ENSMUSG00000028560" source="2188" target="1974" cy:directed="1"/>
      <edge id="20247" label="ENSMUSG00000022346 (TF-TG) ENSMUSG00000028573" source="2188" target="1488" cy:directed="1"/>
      <edge id="20246" label="ENSMUSG00000022346 (TF-TG) ENSMUSG00000028581" source="2188" target="1973" cy:directed="1"/>
      <edge id="20245" label="ENSMUSG00000022346 (TF-TG) ENSMUSG00000028597" source="2188" target="897" cy:directed="1"/>
      <edge id="20244" label="ENSMUSG00000022346 (TF-TG) ENSMUSG00000028602" source="2188" target="1972" cy:directed="1"/>
      <edge id="20243" label="ENSMUSG00000022346 (TF-TG) ENSMUSG00000028614" source="2188" target="1971" cy:directed="1"/>
      <edge id="20242" label="ENSMUSG00000022346 (TF-TG) ENSMUSG00000028631" source="2188" target="896" cy:directed="1"/>
      <edge id="20241" label="ENSMUSG00000022346 (TF-TG) ENSMUSG00000028633" source="2188" target="1970" cy:directed="1"/>
      <edge id="20240" label="ENSMUSG00000022346 (TF-TG) ENSMUSG00000028634" source="2188" target="1969" cy:directed="1"/>
      <edge id="20239" label="ENSMUSG00000022346 (TF-TG) ENSMUSG00000028641" source="2188" target="1968" cy:directed="1"/>
      <edge id="20238" label="ENSMUSG00000022346 (TF-TG) ENSMUSG00000028693" source="2188" target="1146" cy:directed="1"/>
      <edge id="20237" label="ENSMUSG00000022346 (TF-TG) ENSMUSG00000028699" source="2188" target="1966" cy:directed="1"/>
      <edge id="20236" label="ENSMUSG00000022346 (TF-TG) ENSMUSG00000028718" source="2188" target="1964" cy:directed="1"/>
      <edge id="20235" label="ENSMUSG00000022346 (TF-TG) ENSMUSG00000028763" source="2188" target="1487" cy:directed="1"/>
      <edge id="20234" label="ENSMUSG00000022346 (TF-TG) ENSMUSG00000028766" source="2188" target="895" cy:directed="1"/>
      <edge id="20233" label="ENSMUSG00000022346 (TF-TG) ENSMUSG00000028785" source="2188" target="894" cy:directed="1"/>
      <edge id="20232" label="ENSMUSG00000022346 (TF-TG) ENSMUSG00000028825" source="2188" target="1486" cy:directed="1"/>
      <edge id="20231" label="ENSMUSG00000022346 (TF-TG) ENSMUSG00000028832" source="2188" target="1963" cy:directed="1"/>
      <edge id="20230" label="ENSMUSG00000022346 (TF-TG) ENSMUSG00000028843" source="2188" target="1633" cy:directed="1"/>
      <edge id="20229" label="ENSMUSG00000022346 (TF-TG) ENSMUSG00000028860" source="2188" target="893" cy:directed="1"/>
      <edge id="20228" label="ENSMUSG00000022346 (TF-TG) ENSMUSG00000028874" source="2188" target="1962" cy:directed="1"/>
      <edge id="20227" label="ENSMUSG00000022346 (TF-TG) ENSMUSG00000028884" source="2188" target="2164" cy:directed="1"/>
      <edge id="20226" label="ENSMUSG00000022346 (TF-TG) ENSMUSG00000028909" source="2188" target="1961" cy:directed="1"/>
      <edge id="20225" label="ENSMUSG00000022346 (TF-TG) ENSMUSG00000028926" source="2188" target="1485" cy:directed="1"/>
      <edge id="20224" label="ENSMUSG00000022346 (TF-TG) ENSMUSG00000028927" source="2188" target="1553" cy:directed="1"/>
      <edge id="20223" label="ENSMUSG00000022346 (TF-TG) ENSMUSG00000028949" source="2188" target="1484" cy:directed="1"/>
      <edge id="20222" label="ENSMUSG00000022346 (TF-TG) ENSMUSG00000028972" source="2188" target="1288" cy:directed="1"/>
      <edge id="20221" label="ENSMUSG00000022346 (TF-TG) ENSMUSG00000028986" source="2188" target="1379" cy:directed="1"/>
      <edge id="20220" label="ENSMUSG00000022346 (TF-TG) ENSMUSG00000029054" source="2188" target="892" cy:directed="1"/>
      <edge id="20219" label="ENSMUSG00000022346 (TF-TG) ENSMUSG00000029096" source="2188" target="891" cy:directed="1"/>
      <edge id="20218" label="ENSMUSG00000022346 (TF-TG) ENSMUSG00000029101" source="2188" target="890" cy:directed="1"/>
      <edge id="20217" label="ENSMUSG00000022346 (TF-TG) ENSMUSG00000029102" source="2188" target="1483" cy:directed="1"/>
      <edge id="20216" label="ENSMUSG00000022346 (TF-TG) ENSMUSG00000029121" source="2188" target="889" cy:directed="1"/>
      <edge id="20215" label="ENSMUSG00000022346 (TF-TG) ENSMUSG00000029123" source="2188" target="888" cy:directed="1"/>
      <edge id="20214" label="ENSMUSG00000022346 (TF-TG) ENSMUSG00000029134" source="2188" target="887" cy:directed="1"/>
      <edge id="20213" label="ENSMUSG00000022346 (TF-TG) ENSMUSG00000029154" source="2188" target="1287" cy:directed="1"/>
      <edge id="20212" label="ENSMUSG00000022346 (TF-TG) ENSMUSG00000029163" source="2188" target="1960" cy:directed="1"/>
      <edge id="20211" label="ENSMUSG00000022346 (TF-TG) ENSMUSG00000029166" source="2188" target="1959" cy:directed="1"/>
      <edge id="20210" label="ENSMUSG00000022346 (TF-TG) ENSMUSG00000029177" source="2188" target="1482" cy:directed="1"/>
      <edge id="20209" label="ENSMUSG00000022346 (TF-TG) ENSMUSG00000029185" source="2188" target="1958" cy:directed="1"/>
      <edge id="20208" label="ENSMUSG00000022346 (TF-TG) ENSMUSG00000029195" source="2188" target="886" cy:directed="1"/>
      <edge id="20207" label="ENSMUSG00000022346 (TF-TG) ENSMUSG00000029279" source="2188" target="885" cy:directed="1"/>
      <edge id="20206" label="ENSMUSG00000022346 (TF-TG) ENSMUSG00000029312" source="2188" target="1957" cy:directed="1"/>
      <edge id="20205" label="ENSMUSG00000022346 (TF-TG) ENSMUSG00000029335" source="2188" target="884" cy:directed="1"/>
      <edge id="20204" label="ENSMUSG00000022346 (TF-TG) ENSMUSG00000029343" source="2188" target="1956" cy:directed="1"/>
      <edge id="20203" label="ENSMUSG00000022346 (TF-TG) ENSMUSG00000029370" source="2188" target="1286" cy:directed="1"/>
      <edge id="20202" label="ENSMUSG00000022346 (TF-TG) ENSMUSG00000029408" source="2188" target="1955" cy:directed="1"/>
      <edge id="20201" label="ENSMUSG00000022346 (TF-TG) ENSMUSG00000029414" source="2188" target="1954" cy:directed="1"/>
      <edge id="20200" label="ENSMUSG00000022346 (TF-TG) ENSMUSG00000029420" source="2188" target="1174" cy:directed="1"/>
      <edge id="20199" label="ENSMUSG00000022346 (TF-TG) ENSMUSG00000029436" source="2188" target="883" cy:directed="1"/>
      <edge id="20198" label="ENSMUSG00000022346 (TF-TG) ENSMUSG00000029470" source="2188" target="1953" cy:directed="1"/>
      <edge id="20197" label="ENSMUSG00000022346 (TF-TG) ENSMUSG00000029490" source="2188" target="1481" cy:directed="1"/>
      <edge id="20196" label="ENSMUSG00000022346 (TF-TG) ENSMUSG00000029516" source="2188" target="1952" cy:directed="1"/>
      <edge id="20195" label="ENSMUSG00000022346 (TF-TG) ENSMUSG00000029521" source="2188" target="2163" cy:directed="1"/>
      <edge id="20194" label="ENSMUSG00000022346 (TF-TG) ENSMUSG00000029541" source="2188" target="882" cy:directed="1"/>
      <edge id="20193" label="ENSMUSG00000022346 (TF-TG) ENSMUSG00000029561" source="2188" target="1285" cy:directed="1"/>
      <edge id="20192" label="ENSMUSG00000022346 (TF-TG) ENSMUSG00000029570" source="2188" target="881" cy:directed="1"/>
      <edge id="20191" label="ENSMUSG00000022346 (TF-TG) ENSMUSG00000029591" source="2188" target="880" cy:directed="1"/>
      <edge id="20190" label="ENSMUSG00000022346 (TF-TG) ENSMUSG00000029596" source="2188" target="879" cy:directed="1"/>
      <edge id="20189" label="ENSMUSG00000022346 (TF-TG) ENSMUSG00000029630" source="2188" target="1950" cy:directed="1"/>
      <edge id="20188" label="ENSMUSG00000022346 (TF-TG) ENSMUSG00000029650" source="2188" target="1949" cy:directed="1"/>
      <edge id="20187" label="ENSMUSG00000022346 (TF-TG) ENSMUSG00000029700" source="2188" target="878" cy:directed="1"/>
      <edge id="20186" label="ENSMUSG00000022346 (TF-TG) ENSMUSG00000029706" source="2188" target="1284" cy:directed="1"/>
      <edge id="20185" label="ENSMUSG00000022346 (TF-TG) ENSMUSG00000029712" source="2188" target="877" cy:directed="1"/>
      <edge id="20184" label="ENSMUSG00000022346 (TF-TG) ENSMUSG00000029716" source="2188" target="876" cy:directed="1"/>
      <edge id="20183" label="ENSMUSG00000022346 (TF-TG) ENSMUSG00000029727" source="2188" target="2184" cy:directed="1"/>
      <edge id="20182" label="ENSMUSG00000022346 (TF-TG) ENSMUSG00000029762" source="2188" target="875" cy:directed="1"/>
      <edge id="20181" label="ENSMUSG00000022346 (TF-TG) ENSMUSG00000029765" source="2188" target="874" cy:directed="1"/>
      <edge id="20180" label="ENSMUSG00000022346 (TF-TG) ENSMUSG00000029828" source="2188" target="1948" cy:directed="1"/>
      <edge id="20179" label="ENSMUSG00000022346 (TF-TG) ENSMUSG00000029847" source="2188" target="1947" cy:directed="1"/>
      <edge id="20178" label="ENSMUSG00000022346 (TF-TG) ENSMUSG00000029862" source="2188" target="873" cy:directed="1"/>
      <edge id="20177" label="ENSMUSG00000022346 (TF-TG) ENSMUSG00000029865" source="2188" target="872" cy:directed="1"/>
      <edge id="20176" label="ENSMUSG00000022346 (TF-TG) ENSMUSG00000029875" source="2188" target="1946" cy:directed="1"/>
      <edge id="20175" label="ENSMUSG00000022346 (TF-TG) ENSMUSG00000029910" source="2188" target="1945" cy:directed="1"/>
      <edge id="20174" label="ENSMUSG00000022346 (TF-TG) ENSMUSG00000029919" source="2188" target="1283" cy:directed="1"/>
      <edge id="20173" label="ENSMUSG00000022346 (TF-TG) ENSMUSG00000030029" source="2188" target="1944" cy:directed="1"/>
      <edge id="20172" label="ENSMUSG00000022346 (TF-TG) ENSMUSG00000030048" source="2188" target="871" cy:directed="1"/>
      <edge id="20171" label="ENSMUSG00000022346 (TF-TG) ENSMUSG00000030074" source="2188" target="1632" cy:directed="1"/>
      <edge id="20170" label="ENSMUSG00000022346 (TF-TG) ENSMUSG00000030087" source="2188" target="870" cy:directed="1"/>
      <edge id="20169" label="ENSMUSG00000022346 (TF-TG) ENSMUSG00000030107" source="2188" target="1943" cy:directed="1"/>
      <edge id="20168" label="ENSMUSG00000022346 (TF-TG) ENSMUSG00000030110" source="2188" target="869" cy:directed="1"/>
      <edge id="20167" label="ENSMUSG00000022346 (TF-TG) ENSMUSG00000030137" source="2188" target="868" cy:directed="1"/>
      <edge id="20166" label="ENSMUSG00000022346 (TF-TG) ENSMUSG00000030199" source="2188" target="1942" cy:directed="1"/>
      <edge id="20165" label="ENSMUSG00000022346 (TF-TG) ENSMUSG00000030263" source="2188" target="1282" cy:directed="1"/>
      <edge id="20164" label="ENSMUSG00000022346 (TF-TG) ENSMUSG00000030275" source="2188" target="1941" cy:directed="1"/>
      <edge id="20163" label="ENSMUSG00000022346 (TF-TG) ENSMUSG00000030287" source="2188" target="867" cy:directed="1"/>
      <edge id="20162" label="ENSMUSG00000022346 (TF-TG) ENSMUSG00000030329" source="2188" target="1281" cy:directed="1"/>
      <edge id="20161" label="ENSMUSG00000022346 (TF-TG) ENSMUSG00000030340" source="2188" target="866" cy:directed="1"/>
      <edge id="20160" label="ENSMUSG00000022346 (TF-TG) ENSMUSG00000030346" source="2188" target="1940" cy:directed="1"/>
      <edge id="20159" label="ENSMUSG00000022346 (TF-TG) ENSMUSG00000030353" source="2188" target="865" cy:directed="1"/>
      <edge id="20158" label="ENSMUSG00000022346 (TF-TG) ENSMUSG00000030359" source="2188" target="1280" cy:directed="1"/>
      <edge id="20157" label="ENSMUSG00000022346 (TF-TG) ENSMUSG00000030401" source="2188" target="864" cy:directed="1"/>
      <edge id="20156" label="ENSMUSG00000022346 (TF-TG) ENSMUSG00000030407" source="2188" target="1939" cy:directed="1"/>
      <edge id="20155" label="ENSMUSG00000022346 (TF-TG) ENSMUSG00000030411" source="2188" target="1480" cy:directed="1"/>
      <edge id="20154" label="ENSMUSG00000022346 (TF-TG) ENSMUSG00000030483" source="2188" target="2183" cy:directed="1"/>
      <edge id="20153" label="ENSMUSG00000022346 (TF-TG) ENSMUSG00000030528" source="2188" target="1938" cy:directed="1"/>
      <edge id="20152" label="ENSMUSG00000022346 (TF-TG) ENSMUSG00000030543" source="2188" target="863" cy:directed="1"/>
      <edge id="20151" label="ENSMUSG00000022346 (TF-TG) ENSMUSG00000030616" source="2188" target="862" cy:directed="1"/>
      <edge id="20150" label="ENSMUSG00000022346 (TF-TG) ENSMUSG00000030659" source="2188" target="1479" cy:directed="1"/>
      <edge id="20149" label="ENSMUSG00000022346 (TF-TG) ENSMUSG00000030671" source="2188" target="1936" cy:directed="1"/>
      <edge id="20148" label="ENSMUSG00000022346 (TF-TG) ENSMUSG00000030677" source="2188" target="1478" cy:directed="1"/>
      <edge id="20147" label="ENSMUSG00000022346 (TF-TG) ENSMUSG00000030717" source="2188" target="1279" cy:directed="1"/>
      <edge id="20146" label="ENSMUSG00000022346 (TF-TG) ENSMUSG00000030772" source="2188" target="861" cy:directed="1"/>
      <edge id="20145" label="ENSMUSG00000022346 (TF-TG) ENSMUSG00000030787" source="2188" target="860" cy:directed="1"/>
      <edge id="20144" label="ENSMUSG00000022346 (TF-TG) ENSMUSG00000030830" source="2188" target="1935" cy:directed="1"/>
      <edge id="20143" label="ENSMUSG00000022346 (TF-TG) ENSMUSG00000030866" source="2188" target="1477" cy:directed="1"/>
      <edge id="20142" label="ENSMUSG00000022346 (TF-TG) ENSMUSG00000030897" source="2188" target="1173" cy:directed="1"/>
      <edge id="20141" label="ENSMUSG00000022346 (TF-TG) ENSMUSG00000030935" source="2188" target="859" cy:directed="1"/>
      <edge id="20140" label="ENSMUSG00000022346 (TF-TG) ENSMUSG00000030978" source="2188" target="858" cy:directed="1"/>
      <edge id="20139" label="ENSMUSG00000022346 (TF-TG) ENSMUSG00000031004" source="2188" target="1934" cy:directed="1"/>
      <edge id="20138" label="ENSMUSG00000022346 (TF-TG) ENSMUSG00000031129" source="2188" target="1933" cy:directed="1"/>
      <edge id="20137" label="ENSMUSG00000022346 (TF-TG) ENSMUSG00000031144" source="2188" target="857" cy:directed="1"/>
      <edge id="20136" label="ENSMUSG00000022346 (TF-TG) ENSMUSG00000031150" source="2188" target="856" cy:directed="1"/>
      <edge id="20135" label="ENSMUSG00000022346 (TF-TG) ENSMUSG00000031155" source="2188" target="1476" cy:directed="1"/>
      <edge id="20134" label="ENSMUSG00000022346 (TF-TG) ENSMUSG00000031173" source="2188" target="1278" cy:directed="1"/>
      <edge id="20133" label="ENSMUSG00000022346 (TF-TG) ENSMUSG00000031220" source="2188" target="855" cy:directed="1"/>
      <edge id="20132" label="ENSMUSG00000022346 (TF-TG) ENSMUSG00000031227" source="2188" target="854" cy:directed="1"/>
      <edge id="20131" label="ENSMUSG00000022346 (TF-TG) ENSMUSG00000031262" source="2188" target="853" cy:directed="1"/>
      <edge id="20130" label="ENSMUSG00000022346 (TF-TG) ENSMUSG00000031284" source="2188" target="852" cy:directed="1"/>
      <edge id="20129" label="ENSMUSG00000022346 (TF-TG) ENSMUSG00000031355" source="2188" target="851" cy:directed="1"/>
      <edge id="20128" label="ENSMUSG00000022346 (TF-TG) ENSMUSG00000031367" source="2188" target="1932" cy:directed="1"/>
      <edge id="20127" label="ENSMUSG00000022346 (TF-TG) ENSMUSG00000031373" source="2188" target="850" cy:directed="1"/>
      <edge id="20126" label="ENSMUSG00000022346 (TF-TG) ENSMUSG00000031387" source="2188" target="849" cy:directed="1"/>
      <edge id="20125" label="ENSMUSG00000022346 (TF-TG) ENSMUSG00000031403" source="2188" target="1277" cy:directed="1"/>
      <edge id="20124" label="ENSMUSG00000022346 (TF-TG) ENSMUSG00000031410" source="2188" target="848" cy:directed="1"/>
      <edge id="20123" label="ENSMUSG00000022346 (TF-TG) ENSMUSG00000031448" source="2188" target="1475" cy:directed="1"/>
      <edge id="20122" label="ENSMUSG00000022346 (TF-TG) ENSMUSG00000031451" source="2188" target="1276" cy:directed="1"/>
      <edge id="20121" label="ENSMUSG00000022346 (TF-TG) ENSMUSG00000031453" source="2188" target="1931" cy:directed="1"/>
      <edge id="20120" label="ENSMUSG00000022346 (TF-TG) ENSMUSG00000031532" source="2188" target="1145" cy:directed="1"/>
      <edge id="20119" label="ENSMUSG00000022346 (TF-TG) ENSMUSG00000031558" source="2188" target="847" cy:directed="1"/>
      <edge id="20118" label="ENSMUSG00000022346 (TF-TG) ENSMUSG00000031562" source="2188" target="846" cy:directed="1"/>
      <edge id="20117" label="ENSMUSG00000022346 (TF-TG) ENSMUSG00000031586" source="2188" target="1378" cy:directed="1"/>
      <edge id="20116" label="ENSMUSG00000022346 (TF-TG) ENSMUSG00000031617" source="2188" target="1930" cy:directed="1"/>
      <edge id="20115" label="ENSMUSG00000022346 (TF-TG) ENSMUSG00000031626" source="2188" target="845" cy:directed="1"/>
      <edge id="20114" label="ENSMUSG00000022346 (TF-TG) ENSMUSG00000031629" source="2188" target="1929" cy:directed="1"/>
      <edge id="20113" label="ENSMUSG00000022346 (TF-TG) ENSMUSG00000031668" source="2188" target="1928" cy:directed="1"/>
      <edge id="20112" label="ENSMUSG00000022346 (TF-TG) ENSMUSG00000031669" source="2188" target="844" cy:directed="1"/>
      <edge id="20111" label="ENSMUSG00000022346 (TF-TG) ENSMUSG00000031730" source="2188" target="1474" cy:directed="1"/>
      <edge id="20110" label="ENSMUSG00000022346 (TF-TG) ENSMUSG00000031756" source="2188" target="1377" cy:directed="1"/>
      <edge id="20109" label="ENSMUSG00000022346 (TF-TG) ENSMUSG00000031757" source="2188" target="1630" cy:directed="1"/>
      <edge id="20108" label="ENSMUSG00000022346 (TF-TG) ENSMUSG00000031760" source="2188" target="1629" cy:directed="1"/>
      <edge id="20107" label="ENSMUSG00000022346 (TF-TG) ENSMUSG00000031778" source="2188" target="843" cy:directed="1"/>
      <edge id="20106" label="ENSMUSG00000022346 (TF-TG) ENSMUSG00000031788" source="2188" target="1628" cy:directed="1"/>
      <edge id="20105" label="ENSMUSG00000022346 (TF-TG) ENSMUSG00000031790" source="2188" target="1172" cy:directed="1"/>
      <edge id="20104" label="ENSMUSG00000022346 (TF-TG) ENSMUSG00000031791" source="2188" target="1627" cy:directed="1"/>
      <edge id="20103" label="ENSMUSG00000022346 (TF-TG) ENSMUSG00000031844" source="2188" target="842" cy:directed="1"/>
      <edge id="20102" label="ENSMUSG00000022346 (TF-TG) ENSMUSG00000031849" source="2188" target="841" cy:directed="1"/>
      <edge id="20101" label="ENSMUSG00000022346 (TF-TG) ENSMUSG00000031853" source="2188" target="1171" cy:directed="1"/>
      <edge id="20100" label="ENSMUSG00000022346 (TF-TG) ENSMUSG00000031903" source="2188" target="1926" cy:directed="1"/>
      <edge id="20099" label="ENSMUSG00000022346 (TF-TG) ENSMUSG00000031919" source="2188" target="840" cy:directed="1"/>
      <edge id="20098" label="ENSMUSG00000022346 (TF-TG) ENSMUSG00000031957" source="2188" target="1473" cy:directed="1"/>
      <edge id="20097" label="ENSMUSG00000022346 (TF-TG) ENSMUSG00000031980" source="2188" target="839" cy:directed="1"/>
      <edge id="20096" label="ENSMUSG00000022346 (TF-TG) ENSMUSG00000031981" source="2188" target="838" cy:directed="1"/>
      <edge id="20095" label="ENSMUSG00000022346 (TF-TG) ENSMUSG00000031987" source="2188" target="1925" cy:directed="1"/>
      <edge id="20094" label="ENSMUSG00000022346 (TF-TG) ENSMUSG00000032015" source="2188" target="837" cy:directed="1"/>
      <edge id="20093" label="ENSMUSG00000022346 (TF-TG) ENSMUSG00000032017" source="2188" target="836" cy:directed="1"/>
      <edge id="20092" label="ENSMUSG00000022346 (TF-TG) ENSMUSG00000032034" source="2188" target="835" cy:directed="1"/>
      <edge id="20091" label="ENSMUSG00000022346 (TF-TG) ENSMUSG00000032035" source="2188" target="834" cy:directed="1"/>
      <edge id="20090" label="ENSMUSG00000022346 (TF-TG) ENSMUSG00000032076" source="2188" target="1626" cy:directed="1"/>
      <edge id="20089" label="ENSMUSG00000022346 (TF-TG) ENSMUSG00000032092" source="2188" target="833" cy:directed="1"/>
      <edge id="20088" label="ENSMUSG00000022346 (TF-TG) ENSMUSG00000032113" source="2188" target="832" cy:directed="1"/>
      <edge id="20087" label="ENSMUSG00000022346 (TF-TG) ENSMUSG00000032120" source="2188" target="1472" cy:directed="1"/>
      <edge id="20086" label="ENSMUSG00000022346 (TF-TG) ENSMUSG00000032186" source="2188" target="831" cy:directed="1"/>
      <edge id="20085" label="ENSMUSG00000022346 (TF-TG) ENSMUSG00000032202" source="2188" target="1924" cy:directed="1"/>
      <edge id="20084" label="ENSMUSG00000022346 (TF-TG) ENSMUSG00000032218" source="2188" target="1923" cy:directed="1"/>
      <edge id="20083" label="ENSMUSG00000022346 (TF-TG) ENSMUSG00000032226" source="2188" target="1922" cy:directed="1"/>
      <edge id="20082" label="ENSMUSG00000022346 (TF-TG) ENSMUSG00000032232" source="2188" target="830" cy:directed="1"/>
      <edge id="20081" label="ENSMUSG00000022346 (TF-TG) ENSMUSG00000032238" source="2188" target="829" cy:directed="1"/>
      <edge id="20080" label="ENSMUSG00000022346 (TF-TG) ENSMUSG00000032251" source="2188" target="1471" cy:directed="1"/>
      <edge id="20079" label="ENSMUSG00000022346 (TF-TG) ENSMUSG00000032254" source="2188" target="1921" cy:directed="1"/>
      <edge id="20078" label="ENSMUSG00000022346 (TF-TG) ENSMUSG00000032278" source="2188" target="828" cy:directed="1"/>
      <edge id="20077" label="ENSMUSG00000022346 (TF-TG) ENSMUSG00000032285" source="2188" target="1376" cy:directed="1"/>
      <edge id="20076" label="ENSMUSG00000022346 (TF-TG) ENSMUSG00000032289" source="2188" target="827" cy:directed="1"/>
      <edge id="20075" label="ENSMUSG00000022346 (TF-TG) ENSMUSG00000032297" source="2188" target="1625" cy:directed="1"/>
      <edge id="20074" label="ENSMUSG00000022346 (TF-TG) ENSMUSG00000032315" source="2188" target="826" cy:directed="1"/>
      <edge id="20073" label="ENSMUSG00000022346 (TF-TG) ENSMUSG00000032322" source="2188" target="1920" cy:directed="1"/>
      <edge id="20072" label="ENSMUSG00000022346 (TF-TG) ENSMUSG00000032338" source="2188" target="1170" cy:directed="1"/>
      <edge id="20071" label="ENSMUSG00000022346 (TF-TG) ENSMUSG00000032344" source="2188" target="1919" cy:directed="1"/>
      <edge id="20070" label="ENSMUSG00000022346 (TF-TG) ENSMUSG00000032346" source="2188" target="825" cy:directed="1"/>
      <edge id="20069" label="ENSMUSG00000022346 (TF-TG) ENSMUSG00000032350" source="2188" target="1918" cy:directed="1"/>
      <edge id="20068" label="ENSMUSG00000022346 (TF-TG) ENSMUSG00000032356" source="2188" target="1375" cy:directed="1"/>
      <edge id="20067" label="ENSMUSG00000022346 (TF-TG) ENSMUSG00000032373" source="2188" target="1916" cy:directed="1"/>
      <edge id="20066" label="ENSMUSG00000022346 (TF-TG) ENSMUSG00000032380" source="2188" target="2162" cy:directed="1"/>
      <edge id="20065" label="ENSMUSG00000022346 (TF-TG) ENSMUSG00000032397" source="2188" target="824" cy:directed="1"/>
      <edge id="20064" label="ENSMUSG00000022346 (TF-TG) ENSMUSG00000032417" source="2188" target="823" cy:directed="1"/>
      <edge id="20063" label="ENSMUSG00000022346 (TF-TG) ENSMUSG00000032420" source="2188" target="822" cy:directed="1"/>
      <edge id="20062" label="ENSMUSG00000022346 (TF-TG) ENSMUSG00000032470" source="2188" target="1469" cy:directed="1"/>
      <edge id="20061" label="ENSMUSG00000022346 (TF-TG) ENSMUSG00000032482" source="2188" target="821" cy:directed="1"/>
      <edge id="20060" label="ENSMUSG00000022346 (TF-TG) ENSMUSG00000032489" source="2188" target="1468" cy:directed="1"/>
      <edge id="20059" label="ENSMUSG00000022346 (TF-TG) ENSMUSG00000032502" source="2188" target="820" cy:directed="1"/>
      <edge id="20058" label="ENSMUSG00000022346 (TF-TG) ENSMUSG00000032531" source="2188" target="1915" cy:directed="1"/>
      <edge id="20057" label="ENSMUSG00000022346 (TF-TG) ENSMUSG00000032532" source="2188" target="819" cy:directed="1"/>
      <edge id="20056" label="ENSMUSG00000022346 (TF-TG) ENSMUSG00000032548" source="2188" target="1624" cy:directed="1"/>
      <edge id="20055" label="ENSMUSG00000022346 (TF-TG) ENSMUSG00000032549" source="2188" target="1275" cy:directed="1"/>
      <edge id="20054" label="ENSMUSG00000022346 (TF-TG) ENSMUSG00000032558" source="2188" target="818" cy:directed="1"/>
      <edge id="20053" label="ENSMUSG00000022346 (TF-TG) ENSMUSG00000032586" source="2188" target="817" cy:directed="1"/>
      <edge id="20052" label="ENSMUSG00000022346 (TF-TG) ENSMUSG00000032640" source="2188" target="1913" cy:directed="1"/>
      <edge id="20051" label="ENSMUSG00000022346 (TF-TG) ENSMUSG00000032656" source="2188" target="1912" cy:directed="1"/>
      <edge id="20050" label="ENSMUSG00000022346 (TF-TG) ENSMUSG00000032733" source="2188" target="1467" cy:directed="1"/>
      <edge id="20049" label="ENSMUSG00000022346 (TF-TG) ENSMUSG00000032769" source="2188" target="1911" cy:directed="1"/>
      <edge id="20048" label="ENSMUSG00000022346 (TF-TG) ENSMUSG00000032773" source="2188" target="1374" cy:directed="1"/>
      <edge id="20047" label="ENSMUSG00000022346 (TF-TG) ENSMUSG00000032776" source="2188" target="1910" cy:directed="1"/>
      <edge id="20046" label="ENSMUSG00000022346 (TF-TG) ENSMUSG00000032783" source="2188" target="1909" cy:directed="1"/>
      <edge id="20045" label="ENSMUSG00000022346 (TF-TG) ENSMUSG00000032839" source="2188" target="1273" cy:directed="1"/>
      <edge id="20044" label="ENSMUSG00000022346 (TF-TG) ENSMUSG00000032852" source="2188" target="816" cy:directed="1"/>
      <edge id="20043" label="ENSMUSG00000022346 (TF-TG) ENSMUSG00000032854" source="2188" target="815" cy:directed="1"/>
      <edge id="20042" label="ENSMUSG00000022346 (TF-TG) ENSMUSG00000032902" source="2188" target="1908" cy:directed="1"/>
      <edge id="20041" label="ENSMUSG00000022346 (TF-TG) ENSMUSG00000032932" source="2188" target="1907" cy:directed="1"/>
      <edge id="20040" label="ENSMUSG00000022346 (TF-TG) ENSMUSG00000032965" source="2188" target="1906" cy:directed="1"/>
      <edge id="20039" label="ENSMUSG00000022346 (TF-TG) ENSMUSG00000032978" source="2188" target="1552" cy:directed="1"/>
      <edge id="20038" label="ENSMUSG00000022346 (TF-TG) ENSMUSG00000033022" source="2188" target="814" cy:directed="1"/>
      <edge id="20037" label="ENSMUSG00000022346 (TF-TG) ENSMUSG00000033032" source="2188" target="813" cy:directed="1"/>
      <edge id="20036" label="ENSMUSG00000022346 (TF-TG) ENSMUSG00000033061" source="2188" target="1623" cy:directed="1"/>
      <edge id="20035" label="ENSMUSG00000022346 (TF-TG) ENSMUSG00000033147" source="2188" target="1905" cy:directed="1"/>
      <edge id="20034" label="ENSMUSG00000022346 (TF-TG) ENSMUSG00000033177" source="2188" target="812" cy:directed="1"/>
      <edge id="20033" label="ENSMUSG00000022346 (TF-TG) ENSMUSG00000033200" source="2188" target="811" cy:directed="1"/>
      <edge id="20032" label="ENSMUSG00000022346 (TF-TG) ENSMUSG00000033222" source="2188" target="810" cy:directed="1"/>
      <edge id="20031" label="ENSMUSG00000022346 (TF-TG) ENSMUSG00000033278" source="2188" target="1373" cy:directed="1"/>
      <edge id="20030" label="ENSMUSG00000022346 (TF-TG) ENSMUSG00000033287" source="2188" target="1904" cy:directed="1"/>
      <edge id="20029" label="ENSMUSG00000022346 (TF-TG) ENSMUSG00000033307" source="2188" target="1622" cy:directed="1"/>
      <edge id="20028" label="ENSMUSG00000022346 (TF-TG) ENSMUSG00000033389" source="2188" target="809" cy:directed="1"/>
      <edge id="20027" label="ENSMUSG00000022346 (TF-TG) ENSMUSG00000033530" source="2188" target="1903" cy:directed="1"/>
      <edge id="20026" label="ENSMUSG00000022346 (TF-TG) ENSMUSG00000033579" source="2188" target="808" cy:directed="1"/>
      <edge id="20025" label="ENSMUSG00000022346 (TF-TG) ENSMUSG00000033590" source="2188" target="807" cy:directed="1"/>
      <edge id="20024" label="ENSMUSG00000022346 (TF-TG) ENSMUSG00000033634" source="2188" target="806" cy:directed="1"/>
      <edge id="20023" label="ENSMUSG00000022346 (TF-TG) ENSMUSG00000033684" source="2188" target="1272" cy:directed="1"/>
      <edge id="20022" label="ENSMUSG00000022346 (TF-TG) ENSMUSG00000033740" source="2188" target="1621" cy:directed="1"/>
      <edge id="20021" label="ENSMUSG00000022346 (TF-TG) ENSMUSG00000033752" source="2188" target="1466" cy:directed="1"/>
      <edge id="20020" label="ENSMUSG00000022346 (TF-TG) ENSMUSG00000033763" source="2188" target="805" cy:directed="1"/>
      <edge id="20019" label="ENSMUSG00000022346 (TF-TG) ENSMUSG00000033825" source="2188" target="804" cy:directed="1"/>
      <edge id="20018" label="ENSMUSG00000022346 (TF-TG) ENSMUSG00000033871" source="2188" target="803" cy:directed="1"/>
      <edge id="20017" label="ENSMUSG00000022346 (TF-TG) ENSMUSG00000033900" source="2188" target="1620" cy:directed="1"/>
      <edge id="20016" label="ENSMUSG00000022346 (TF-TG) ENSMUSG00000033906" source="2188" target="1902" cy:directed="1"/>
      <edge id="20015" label="ENSMUSG00000022346 (TF-TG) ENSMUSG00000033917" source="2188" target="1901" cy:directed="1"/>
      <edge id="20014" label="ENSMUSG00000022346 (TF-TG) ENSMUSG00000033952" source="2188" target="1900" cy:directed="1"/>
      <edge id="20013" label="ENSMUSG00000022346 (TF-TG) ENSMUSG00000033970" source="2188" target="1465" cy:directed="1"/>
      <edge id="20012" label="ENSMUSG00000022346 (TF-TG) ENSMUSG00000034112" source="2188" target="802" cy:directed="1"/>
      <edge id="20011" label="ENSMUSG00000022346 (TF-TG) ENSMUSG00000034116" source="2188" target="1899" cy:directed="1"/>
      <edge id="20010" label="ENSMUSG00000022346 (TF-TG) ENSMUSG00000034118" source="2188" target="801" cy:directed="1"/>
      <edge id="20009" label="ENSMUSG00000022346 (TF-TG) ENSMUSG00000034164" source="2188" target="1898" cy:directed="1"/>
      <edge id="20008" label="ENSMUSG00000022346 (TF-TG) ENSMUSG00000034177" source="2188" target="1897" cy:directed="1"/>
      <edge id="20007" label="ENSMUSG00000022346 (TF-TG) ENSMUSG00000034265" source="2188" target="1895" cy:directed="1"/>
      <edge id="20006" label="ENSMUSG00000022346 (TF-TG) ENSMUSG00000034275" source="2188" target="1619" cy:directed="1"/>
      <edge id="20005" label="ENSMUSG00000022346 (TF-TG) ENSMUSG00000034303" source="2188" target="800" cy:directed="1"/>
      <edge id="20004" label="ENSMUSG00000022346 (TF-TG) ENSMUSG00000034317" source="2188" target="1894" cy:directed="1"/>
      <edge id="20003" label="ENSMUSG00000022346 (TF-TG) ENSMUSG00000034353" source="2188" target="1464" cy:directed="1"/>
      <edge id="20002" label="ENSMUSG00000022346 (TF-TG) ENSMUSG00000034472" source="2188" target="799" cy:directed="1"/>
      <edge id="20001" label="ENSMUSG00000022346 (TF-TG) ENSMUSG00000034528" source="2188" target="798" cy:directed="1"/>
      <edge id="20000" label="ENSMUSG00000022346 (TF-TG) ENSMUSG00000034579" source="2188" target="1618" cy:directed="1"/>
      <edge id="19999" label="ENSMUSG00000022346 (TF-TG) ENSMUSG00000034586" source="2188" target="1893" cy:directed="1"/>
      <edge id="19998" label="ENSMUSG00000022346 (TF-TG) ENSMUSG00000034648" source="2188" target="797" cy:directed="1"/>
      <edge id="19997" label="ENSMUSG00000022346 (TF-TG) ENSMUSG00000034656" source="2188" target="796" cy:directed="1"/>
      <edge id="19996" label="ENSMUSG00000022346 (TF-TG) ENSMUSG00000034675" source="2188" target="795" cy:directed="1"/>
      <edge id="19995" label="ENSMUSG00000022346 (TF-TG) ENSMUSG00000034677" source="2188" target="794" cy:directed="1"/>
      <edge id="19994" label="ENSMUSG00000022346 (TF-TG) ENSMUSG00000034758" source="2188" target="1892" cy:directed="1"/>
      <edge id="19993" label="ENSMUSG00000022346 (TF-TG) ENSMUSG00000034768" source="2188" target="1463" cy:directed="1"/>
      <edge id="19992" label="ENSMUSG00000022346 (TF-TG) ENSMUSG00000034773" source="2188" target="1617" cy:directed="1"/>
      <edge id="19991" label="ENSMUSG00000022346 (TF-TG) ENSMUSG00000034774" source="2188" target="1616" cy:directed="1"/>
      <edge id="19990" label="ENSMUSG00000022346 (TF-TG) ENSMUSG00000034785" source="2188" target="793" cy:directed="1"/>
      <edge id="19989" label="ENSMUSG00000022346 (TF-TG) ENSMUSG00000034818" source="2188" target="1143" cy:directed="1"/>
      <edge id="19988" label="ENSMUSG00000022346 (TF-TG) ENSMUSG00000034858" source="2188" target="1890" cy:directed="1"/>
      <edge id="19987" label="ENSMUSG00000022346 (TF-TG) ENSMUSG00000034883" source="2188" target="1889" cy:directed="1"/>
      <edge id="19986" label="ENSMUSG00000022346 (TF-TG) ENSMUSG00000034906" source="2188" target="1462" cy:directed="1"/>
      <edge id="19985" label="ENSMUSG00000022346 (TF-TG) ENSMUSG00000035095" source="2188" target="1461" cy:directed="1"/>
      <edge id="19984" label="ENSMUSG00000022346 (TF-TG) ENSMUSG00000035158" source="2188" target="2157" cy:directed="1"/>
      <edge id="19983" label="ENSMUSG00000022346 (TF-TG) ENSMUSG00000035164" source="2188" target="1269" cy:directed="1"/>
      <edge id="19982" label="ENSMUSG00000022346 (TF-TG) ENSMUSG00000035200" source="2188" target="792" cy:directed="1"/>
      <edge id="19981" label="ENSMUSG00000022346 (TF-TG) ENSMUSG00000035226" source="2188" target="1615" cy:directed="1"/>
      <edge id="19980" label="ENSMUSG00000022346 (TF-TG) ENSMUSG00000035273" source="2188" target="1888" cy:directed="1"/>
      <edge id="19979" label="ENSMUSG00000022346 (TF-TG) ENSMUSG00000035277" source="2188" target="791" cy:directed="1"/>
      <edge id="19978" label="ENSMUSG00000022346 (TF-TG) ENSMUSG00000035279" source="2188" target="1614" cy:directed="1"/>
      <edge id="19977" label="ENSMUSG00000022346 (TF-TG) ENSMUSG00000035357" source="2188" target="1613" cy:directed="1"/>
      <edge id="19976" label="ENSMUSG00000022346 (TF-TG) ENSMUSG00000035390" source="2188" target="790" cy:directed="1"/>
      <edge id="19975" label="ENSMUSG00000022346 (TF-TG) ENSMUSG00000035431" source="2188" target="789" cy:directed="1"/>
      <edge id="19974" label="ENSMUSG00000022346 (TF-TG) ENSMUSG00000035451" source="2188" target="1129" cy:directed="1"/>
      <edge id="19973" label="ENSMUSG00000022346 (TF-TG) ENSMUSG00000035455" source="2188" target="1887" cy:directed="1"/>
      <edge id="19972" label="ENSMUSG00000022346 (TF-TG) ENSMUSG00000035486" source="2188" target="1886" cy:directed="1"/>
      <edge id="19971" label="ENSMUSG00000022346 (TF-TG) ENSMUSG00000035506" source="2188" target="1460" cy:directed="1"/>
      <edge id="19970" label="ENSMUSG00000022346 (TF-TG) ENSMUSG00000035509" source="2188" target="1612" cy:directed="1"/>
      <edge id="19969" label="ENSMUSG00000022346 (TF-TG) ENSMUSG00000035561" source="2188" target="1268" cy:directed="1"/>
      <edge id="19968" label="ENSMUSG00000022346 (TF-TG) ENSMUSG00000035606" source="2188" target="1611" cy:directed="1"/>
      <edge id="19967" label="ENSMUSG00000022346 (TF-TG) ENSMUSG00000035615" source="2188" target="788" cy:directed="1"/>
      <edge id="19966" label="ENSMUSG00000022346 (TF-TG) ENSMUSG00000035683" source="2188" target="787" cy:directed="1"/>
      <edge id="19965" label="ENSMUSG00000022346 (TF-TG) ENSMUSG00000035692" source="2188" target="1459" cy:directed="1"/>
      <edge id="19964" label="ENSMUSG00000022346 (TF-TG) ENSMUSG00000035699" source="2188" target="786" cy:directed="1"/>
      <edge id="19963" label="ENSMUSG00000022346 (TF-TG) ENSMUSG00000035775" source="2188" target="785" cy:directed="1"/>
      <edge id="19962" label="ENSMUSG00000022346 (TF-TG) ENSMUSG00000035847" source="2188" target="1884" cy:directed="1"/>
      <edge id="19961" label="ENSMUSG00000022346 (TF-TG) ENSMUSG00000035849" source="2188" target="1458" cy:directed="1"/>
      <edge id="19960" label="ENSMUSG00000022346 (TF-TG) ENSMUSG00000035863" source="2188" target="1457" cy:directed="1"/>
      <edge id="19959" label="ENSMUSG00000022346 (TF-TG) ENSMUSG00000035864" source="2188" target="2180" cy:directed="1"/>
      <edge id="19958" label="ENSMUSG00000022346 (TF-TG) ENSMUSG00000035896" source="2188" target="784" cy:directed="1"/>
      <edge id="19957" label="ENSMUSG00000022346 (TF-TG) ENSMUSG00000035901" source="2188" target="1883" cy:directed="1"/>
      <edge id="19956" label="ENSMUSG00000022346 (TF-TG) ENSMUSG00000035967" source="2188" target="1456" cy:directed="1"/>
      <edge id="19955" label="ENSMUSG00000022346 (TF-TG) ENSMUSG00000035984" source="2188" target="783" cy:directed="1"/>
      <edge id="19954" label="ENSMUSG00000022346 (TF-TG) ENSMUSG00000036022" source="2188" target="1882" cy:directed="1"/>
      <edge id="19953" label="ENSMUSG00000022346 (TF-TG) ENSMUSG00000036036" source="2188" target="1267" cy:directed="1"/>
      <edge id="19952" label="ENSMUSG00000022346 (TF-TG) ENSMUSG00000036053" source="2188" target="782" cy:directed="1"/>
      <edge id="19951" label="ENSMUSG00000022346 (TF-TG) ENSMUSG00000036181" source="2188" target="1881" cy:directed="1"/>
      <edge id="19950" label="ENSMUSG00000022346 (TF-TG) ENSMUSG00000036223" source="2188" target="1455" cy:directed="1"/>
      <edge id="19949" label="ENSMUSG00000022346 (TF-TG) ENSMUSG00000036225" source="2188" target="781" cy:directed="1"/>
      <edge id="19948" label="ENSMUSG00000022346 (TF-TG) ENSMUSG00000036256" source="2188" target="1880" cy:directed="1"/>
      <edge id="19947" label="ENSMUSG00000022346 (TF-TG) ENSMUSG00000036304" source="2188" target="780" cy:directed="1"/>
      <edge id="19946" label="ENSMUSG00000022346 (TF-TG) ENSMUSG00000036306" source="2188" target="1879" cy:directed="1"/>
      <edge id="19945" label="ENSMUSG00000022346 (TF-TG) ENSMUSG00000036327" source="2188" target="779" cy:directed="1"/>
      <edge id="19944" label="ENSMUSG00000022346 (TF-TG) ENSMUSG00000036368" source="2188" target="1878" cy:directed="1"/>
      <edge id="19943" label="ENSMUSG00000022346 (TF-TG) ENSMUSG00000036437" source="2188" target="778" cy:directed="1"/>
      <edge id="19942" label="ENSMUSG00000022346 (TF-TG) ENSMUSG00000036492" source="2188" target="777" cy:directed="1"/>
      <edge id="19941" label="ENSMUSG00000022346 (TF-TG) ENSMUSG00000036526" source="2188" target="1877" cy:directed="1"/>
      <edge id="19940" label="ENSMUSG00000022346 (TF-TG) ENSMUSG00000036745" source="2188" target="1266" cy:directed="1"/>
      <edge id="19939" label="ENSMUSG00000022346 (TF-TG) ENSMUSG00000036766" source="2188" target="776" cy:directed="1"/>
      <edge id="19938" label="ENSMUSG00000022346 (TF-TG) ENSMUSG00000036777" source="2188" target="1265" cy:directed="1"/>
      <edge id="19937" label="ENSMUSG00000022346 (TF-TG) ENSMUSG00000036782" source="2188" target="775" cy:directed="1"/>
      <edge id="19936" label="ENSMUSG00000022346 (TF-TG) ENSMUSG00000036863" source="2188" target="1876" cy:directed="1"/>
      <edge id="19935" label="ENSMUSG00000022346 (TF-TG) ENSMUSG00000036872" source="2188" target="774" cy:directed="1"/>
      <edge id="19934" label="ENSMUSG00000022346 (TF-TG) ENSMUSG00000036875" source="2188" target="1875" cy:directed="1"/>
      <edge id="19933" label="ENSMUSG00000022346 (TF-TG) ENSMUSG00000036887" source="2188" target="1264" cy:directed="1"/>
      <edge id="19932" label="ENSMUSG00000022346 (TF-TG) ENSMUSG00000036892" source="2188" target="1454" cy:directed="1"/>
      <edge id="19931" label="ENSMUSG00000022346 (TF-TG) ENSMUSG00000036913" source="2188" target="1610" cy:directed="1"/>
      <edge id="19930" label="ENSMUSG00000022346 (TF-TG) ENSMUSG00000036915" source="2188" target="1167" cy:directed="1"/>
      <edge id="19929" label="ENSMUSG00000022346 (TF-TG) ENSMUSG00000036944" source="2188" target="773" cy:directed="1"/>
      <edge id="19928" label="ENSMUSG00000022346 (TF-TG) ENSMUSG00000036989" source="2188" target="772" cy:directed="1"/>
      <edge id="19927" label="ENSMUSG00000022346 (TF-TG) ENSMUSG00000036995" source="2188" target="771" cy:directed="1"/>
      <edge id="19926" label="ENSMUSG00000022346 (TF-TG) ENSMUSG00000037005" source="2188" target="1874" cy:directed="1"/>
      <edge id="19925" label="ENSMUSG00000022346 (TF-TG) ENSMUSG00000037032" source="2188" target="1263" cy:directed="1"/>
      <edge id="19924" label="ENSMUSG00000022346 (TF-TG) ENSMUSG00000037033" source="2188" target="770" cy:directed="1"/>
      <edge id="19923" label="ENSMUSG00000022346 (TF-TG) ENSMUSG00000037035" source="2188" target="769" cy:directed="1"/>
      <edge id="19922" label="ENSMUSG00000022346 (TF-TG) ENSMUSG00000037106" source="2188" target="768" cy:directed="1"/>
      <edge id="19921" label="ENSMUSG00000022346 (TF-TG) ENSMUSG00000037126" source="2188" target="767" cy:directed="1"/>
      <edge id="19920" label="ENSMUSG00000022346 (TF-TG) ENSMUSG00000037159" source="2188" target="1873" cy:directed="1"/>
      <edge id="19919" label="ENSMUSG00000022346 (TF-TG) ENSMUSG00000037235" source="2188" target="1872" cy:directed="1"/>
      <edge id="19918" label="ENSMUSG00000022346 (TF-TG) ENSMUSG00000037275" source="2188" target="766" cy:directed="1"/>
      <edge id="19917" label="ENSMUSG00000022346 (TF-TG) ENSMUSG00000037306" source="2188" target="1871" cy:directed="1"/>
      <edge id="19916" label="ENSMUSG00000022346 (TF-TG) ENSMUSG00000037419" source="2188" target="1262" cy:directed="1"/>
      <edge id="19915" label="ENSMUSG00000022346 (TF-TG) ENSMUSG00000037428" source="2188" target="1870" cy:directed="1"/>
      <edge id="19914" label="ENSMUSG00000022346 (TF-TG) ENSMUSG00000037447" source="2188" target="1869" cy:directed="1"/>
      <edge id="19913" label="ENSMUSG00000022346 (TF-TG) ENSMUSG00000037474" source="2188" target="765" cy:directed="1"/>
      <edge id="19912" label="ENSMUSG00000022346 (TF-TG) ENSMUSG00000037509" source="2188" target="764" cy:directed="1"/>
      <edge id="19911" label="ENSMUSG00000022346 (TF-TG) ENSMUSG00000037568" source="2188" target="1551" cy:directed="1"/>
      <edge id="19910" label="ENSMUSG00000022346 (TF-TG) ENSMUSG00000037579" source="2188" target="1868" cy:directed="1"/>
      <edge id="19909" label="ENSMUSG00000022346 (TF-TG) ENSMUSG00000037580" source="2188" target="1609" cy:directed="1"/>
      <edge id="19908" label="ENSMUSG00000022346 (TF-TG) ENSMUSG00000037583" source="2188" target="2155" cy:directed="1"/>
      <edge id="19907" label="ENSMUSG00000022346 (TF-TG) ENSMUSG00000037606" source="2188" target="1867" cy:directed="1"/>
      <edge id="19906" label="ENSMUSG00000022346 (TF-TG) ENSMUSG00000037621" source="2188" target="763" cy:directed="1"/>
      <edge id="19905" label="ENSMUSG00000022346 (TF-TG) ENSMUSG00000037624" source="2188" target="762" cy:directed="1"/>
      <edge id="19904" label="ENSMUSG00000022346 (TF-TG) ENSMUSG00000037628" source="2188" target="1866" cy:directed="1"/>
      <edge id="19903" label="ENSMUSG00000022346 (TF-TG) ENSMUSG00000037643" source="2188" target="1865" cy:directed="1"/>
      <edge id="19902" label="ENSMUSG00000022346 (TF-TG) ENSMUSG00000037664" source="2188" target="1608" cy:directed="1"/>
      <edge id="19901" label="ENSMUSG00000022346 (TF-TG) ENSMUSG00000037712" source="2188" target="761" cy:directed="1"/>
      <edge id="19900" label="ENSMUSG00000022346 (TF-TG) ENSMUSG00000037725" source="2188" target="760" cy:directed="1"/>
      <edge id="19899" label="ENSMUSG00000022346 (TF-TG) ENSMUSG00000037762" source="2188" target="759" cy:directed="1"/>
      <edge id="19898" label="ENSMUSG00000022346 (TF-TG) ENSMUSG00000037784" source="2188" target="758" cy:directed="1"/>
      <edge id="19897" label="ENSMUSG00000022346 (TF-TG) ENSMUSG00000037820" source="2188" target="1864" cy:directed="1"/>
      <edge id="19896" label="ENSMUSG00000022346 (TF-TG) ENSMUSG00000037846" source="2188" target="1863" cy:directed="1"/>
      <edge id="19895" label="ENSMUSG00000022346 (TF-TG) ENSMUSG00000037852" source="2188" target="757" cy:directed="1"/>
      <edge id="19894" label="ENSMUSG00000022346 (TF-TG) ENSMUSG00000037868" source="2188" target="1261" cy:directed="1"/>
      <edge id="19893" label="ENSMUSG00000022346 (TF-TG) ENSMUSG00000037942" source="2188" target="756" cy:directed="1"/>
      <edge id="19892" label="ENSMUSG00000022346 (TF-TG) ENSMUSG00000037953" source="2188" target="1166" cy:directed="1"/>
      <edge id="19891" label="ENSMUSG00000022346 (TF-TG) ENSMUSG00000037962" source="2188" target="755" cy:directed="1"/>
      <edge id="19890" label="ENSMUSG00000022346 (TF-TG) ENSMUSG00000037973" source="2188" target="754" cy:directed="1"/>
      <edge id="19889" label="ENSMUSG00000022346 (TF-TG) ENSMUSG00000037991" source="2188" target="1260" cy:directed="1"/>
      <edge id="19888" label="ENSMUSG00000022346 (TF-TG) ENSMUSG00000038005" source="2188" target="1862" cy:directed="1"/>
      <edge id="19887" label="ENSMUSG00000022346 (TF-TG) ENSMUSG00000038039" source="2188" target="1861" cy:directed="1"/>
      <edge id="19886" label="ENSMUSG00000022346 (TF-TG) ENSMUSG00000038068" source="2188" target="1860" cy:directed="1"/>
      <edge id="19885" label="ENSMUSG00000022346 (TF-TG) ENSMUSG00000038146" source="2188" target="1142" cy:directed="1"/>
      <edge id="19884" label="ENSMUSG00000022346 (TF-TG) ENSMUSG00000038175" source="2188" target="1859" cy:directed="1"/>
      <edge id="19883" label="ENSMUSG00000022346 (TF-TG) ENSMUSG00000038209" source="2188" target="753" cy:directed="1"/>
      <edge id="19882" label="ENSMUSG00000022346 (TF-TG) ENSMUSG00000038241" source="2188" target="1858" cy:directed="1"/>
      <edge id="19881" label="ENSMUSG00000022346 (TF-TG) ENSMUSG00000038255" source="2188" target="1607" cy:directed="1"/>
      <edge id="19880" label="ENSMUSG00000022346 (TF-TG) ENSMUSG00000038296" source="2188" target="752" cy:directed="1"/>
      <edge id="19879" label="ENSMUSG00000022346 (TF-TG) ENSMUSG00000038305" source="2188" target="751" cy:directed="1"/>
      <edge id="19878" label="ENSMUSG00000022346 (TF-TG) ENSMUSG00000038319" source="2188" target="1857" cy:directed="1"/>
      <edge id="19877" label="ENSMUSG00000022346 (TF-TG) ENSMUSG00000038349" source="2188" target="750" cy:directed="1"/>
      <edge id="19876" label="ENSMUSG00000022346 (TF-TG) ENSMUSG00000038354" source="2188" target="1856" cy:directed="1"/>
      <edge id="19875" label="ENSMUSG00000022346 (TF-TG) ENSMUSG00000038379" source="2188" target="1855" cy:directed="1"/>
      <edge id="19874" label="ENSMUSG00000022346 (TF-TG) ENSMUSG00000038390" source="2188" target="1453" cy:directed="1"/>
      <edge id="19873" label="ENSMUSG00000022346 (TF-TG) ENSMUSG00000038451" source="2188" target="1606" cy:directed="1"/>
      <edge id="19872" label="ENSMUSG00000022346 (TF-TG) ENSMUSG00000038456" source="2188" target="1605" cy:directed="1"/>
      <edge id="19871" label="ENSMUSG00000022346 (TF-TG) ENSMUSG00000038463" source="2188" target="1258" cy:directed="1"/>
      <edge id="19870" label="ENSMUSG00000022346 (TF-TG) ENSMUSG00000038486" source="2188" target="1257" cy:directed="1"/>
      <edge id="19869" label="ENSMUSG00000022346 (TF-TG) ENSMUSG00000038530" source="2188" target="1398" cy:directed="1"/>
      <edge id="19868" label="ENSMUSG00000022346 (TF-TG) ENSMUSG00000038555" source="2188" target="749" cy:directed="1"/>
      <edge id="19867" label="ENSMUSG00000022346 (TF-TG) ENSMUSG00000038560" source="2188" target="748" cy:directed="1"/>
      <edge id="19866" label="ENSMUSG00000022346 (TF-TG) ENSMUSG00000038578" source="2188" target="1853" cy:directed="1"/>
      <edge id="19865" label="ENSMUSG00000022346 (TF-TG) ENSMUSG00000038580" source="2188" target="1256" cy:directed="1"/>
      <edge id="19864" label="ENSMUSG00000022346 (TF-TG) ENSMUSG00000038599" source="2188" target="1255" cy:directed="1"/>
      <edge id="19863" label="ENSMUSG00000022346 (TF-TG) ENSMUSG00000038644" source="2188" target="1852" cy:directed="1"/>
      <edge id="19862" label="ENSMUSG00000022346 (TF-TG) ENSMUSG00000038648" source="2188" target="1452" cy:directed="1"/>
      <edge id="19861" label="ENSMUSG00000022346 (TF-TG) ENSMUSG00000038692" source="2188" target="747" cy:directed="1"/>
      <edge id="19860" label="ENSMUSG00000022346 (TF-TG) ENSMUSG00000038745" source="2188" target="1254" cy:directed="1"/>
      <edge id="19859" label="ENSMUSG00000022346 (TF-TG) ENSMUSG00000038777" source="2188" target="1253" cy:directed="1"/>
      <edge id="19858" label="ENSMUSG00000022346 (TF-TG) ENSMUSG00000038836" source="2188" target="1851" cy:directed="1"/>
      <edge id="19857" label="ENSMUSG00000022346 (TF-TG) ENSMUSG00000038879" source="2188" target="1604" cy:directed="1"/>
      <edge id="19856" label="ENSMUSG00000022346 (TF-TG) ENSMUSG00000038903" source="2188" target="746" cy:directed="1"/>
      <edge id="19855" label="ENSMUSG00000022346 (TF-TG) ENSMUSG00000039013" source="2188" target="1141" cy:directed="1"/>
      <edge id="19854" label="ENSMUSG00000022346 (TF-TG) ENSMUSG00000039050" source="2188" target="1850" cy:directed="1"/>
      <edge id="19853" label="ENSMUSG00000022346 (TF-TG) ENSMUSG00000039059" source="2188" target="1849" cy:directed="1"/>
      <edge id="19852" label="ENSMUSG00000022346 (TF-TG) ENSMUSG00000039115" source="2188" target="1848" cy:directed="1"/>
      <edge id="19851" label="ENSMUSG00000022346 (TF-TG) ENSMUSG00000039126" source="2188" target="1847" cy:directed="1"/>
      <edge id="19850" label="ENSMUSG00000022346 (TF-TG) ENSMUSG00000039145" source="2188" target="1846" cy:directed="1"/>
      <edge id="19849" label="ENSMUSG00000022346 (TF-TG) ENSMUSG00000039157" source="2188" target="1845" cy:directed="1"/>
      <edge id="19848" label="ENSMUSG00000022346 (TF-TG) ENSMUSG00000039158" source="2188" target="1844" cy:directed="1"/>
      <edge id="19847" label="ENSMUSG00000022346 (TF-TG) ENSMUSG00000039168" source="2188" target="1843" cy:directed="1"/>
      <edge id="19846" label="ENSMUSG00000022346 (TF-TG) ENSMUSG00000039187" source="2188" target="745" cy:directed="1"/>
      <edge id="19845" label="ENSMUSG00000022346 (TF-TG) ENSMUSG00000039200" source="2188" target="744" cy:directed="1"/>
      <edge id="19844" label="ENSMUSG00000022346 (TF-TG) ENSMUSG00000039234" source="2188" target="1842" cy:directed="1"/>
      <edge id="19843" label="ENSMUSG00000022346 (TF-TG) ENSMUSG00000039236" source="2188" target="2189" cy:directed="1"/>
      <edge id="19842" label="ENSMUSG00000022346 (TF-TG) ENSMUSG00000039270" source="2188" target="1841" cy:directed="1"/>
      <edge id="19841" label="ENSMUSG00000022346 (TF-TG) ENSMUSG00000039304" source="2188" target="1451" cy:directed="1"/>
      <edge id="19840" label="ENSMUSG00000022346 (TF-TG) ENSMUSG00000039323" source="2188" target="1450" cy:directed="1"/>
      <edge id="19839" label="ENSMUSG00000022346 (TF-TG) ENSMUSG00000039372" source="2188" target="1603" cy:directed="1"/>
      <edge id="19838" label="ENSMUSG00000022346 (TF-TG) ENSMUSG00000039384" source="2188" target="1840" cy:directed="1"/>
      <edge id="19837" label="ENSMUSG00000022346 (TF-TG) ENSMUSG00000039395" source="2188" target="1449" cy:directed="1"/>
      <edge id="19836" label="ENSMUSG00000022346 (TF-TG) ENSMUSG00000039396" source="2188" target="743" cy:directed="1"/>
      <edge id="19835" label="ENSMUSG00000022346 (TF-TG) ENSMUSG00000039530" source="2188" target="1839" cy:directed="1"/>
      <edge id="19834" label="ENSMUSG00000022346 (TF-TG) ENSMUSG00000039601" source="2188" target="742" cy:directed="1"/>
      <edge id="19833" label="ENSMUSG00000022346 (TF-TG) ENSMUSG00000039621" source="2188" target="1838" cy:directed="1"/>
      <edge id="19832" label="ENSMUSG00000022346 (TF-TG) ENSMUSG00000039629" source="2188" target="741" cy:directed="1"/>
      <edge id="19831" label="ENSMUSG00000022346 (TF-TG) ENSMUSG00000039676" source="2188" target="1252" cy:directed="1"/>
      <edge id="19830" label="ENSMUSG00000022346 (TF-TG) ENSMUSG00000039683" source="2188" target="1837" cy:directed="1"/>
      <edge id="19829" label="ENSMUSG00000022346 (TF-TG) ENSMUSG00000039748" source="2188" target="740" cy:directed="1"/>
      <edge id="19828" label="ENSMUSG00000022346 (TF-TG) ENSMUSG00000039765" source="2188" target="739" cy:directed="1"/>
      <edge id="19827" label="ENSMUSG00000022346 (TF-TG) ENSMUSG00000039774" source="2188" target="1836" cy:directed="1"/>
      <edge id="19826" label="ENSMUSG00000022346 (TF-TG) ENSMUSG00000039809" source="2188" target="738" cy:directed="1"/>
      <edge id="19825" label="ENSMUSG00000022346 (TF-TG) ENSMUSG00000039814" source="2188" target="1835" cy:directed="1"/>
      <edge id="19824" label="ENSMUSG00000022346 (TF-TG) ENSMUSG00000039831" source="2188" target="737" cy:directed="1"/>
      <edge id="19823" label="ENSMUSG00000022346 (TF-TG) ENSMUSG00000039934" source="2188" target="1602" cy:directed="1"/>
      <edge id="19822" label="ENSMUSG00000022346 (TF-TG) ENSMUSG00000039943" source="2188" target="1448" cy:directed="1"/>
      <edge id="19821" label="ENSMUSG00000022346 (TF-TG) ENSMUSG00000039982" source="2188" target="1834" cy:directed="1"/>
      <edge id="19820" label="ENSMUSG00000022346 (TF-TG) ENSMUSG00000040016" source="2188" target="736" cy:directed="1"/>
      <edge id="19819" label="ENSMUSG00000022346 (TF-TG) ENSMUSG00000040035" source="2188" target="1447" cy:directed="1"/>
      <edge id="19818" label="ENSMUSG00000022346 (TF-TG) ENSMUSG00000040046" source="2188" target="1140" cy:directed="1"/>
      <edge id="19817" label="ENSMUSG00000022346 (TF-TG) ENSMUSG00000040061" source="2188" target="1833" cy:directed="1"/>
      <edge id="19816" label="ENSMUSG00000022346 (TF-TG) ENSMUSG00000040084" source="2188" target="1832" cy:directed="1"/>
      <edge id="19815" label="ENSMUSG00000022346 (TF-TG) ENSMUSG00000040118" source="2188" target="735" cy:directed="1"/>
      <edge id="19814" label="ENSMUSG00000022346 (TF-TG) ENSMUSG00000040121" source="2188" target="734" cy:directed="1"/>
      <edge id="19813" label="ENSMUSG00000022346 (TF-TG) ENSMUSG00000040136" source="2188" target="1550" cy:directed="1"/>
      <edge id="19812" label="ENSMUSG00000022346 (TF-TG) ENSMUSG00000040152" source="2188" target="733" cy:directed="1"/>
      <edge id="19811" label="ENSMUSG00000022346 (TF-TG) ENSMUSG00000040170" source="2188" target="732" cy:directed="1"/>
      <edge id="19810" label="ENSMUSG00000022346 (TF-TG) ENSMUSG00000040181" source="2188" target="731" cy:directed="1"/>
      <edge id="19809" label="ENSMUSG00000022346 (TF-TG) ENSMUSG00000040209" source="2188" target="1831" cy:directed="1"/>
      <edge id="19808" label="ENSMUSG00000022346 (TF-TG) ENSMUSG00000040276" source="2188" target="1830" cy:directed="1"/>
      <edge id="19807" label="ENSMUSG00000022346 (TF-TG) ENSMUSG00000040339" source="2188" target="1829" cy:directed="1"/>
      <edge id="19806" label="ENSMUSG00000022346 (TF-TG) ENSMUSG00000040380" source="2188" target="1251" cy:directed="1"/>
      <edge id="19805" label="ENSMUSG00000022346 (TF-TG) ENSMUSG00000040387" source="2188" target="730" cy:directed="1"/>
      <edge id="19804" label="ENSMUSG00000022346 (TF-TG) ENSMUSG00000040389" source="2188" target="729" cy:directed="1"/>
      <edge id="19803" label="ENSMUSG00000022346 (TF-TG) ENSMUSG00000040433" source="2188" target="728" cy:directed="1"/>
      <edge id="19802" label="ENSMUSG00000022346 (TF-TG) ENSMUSG00000040462" source="2188" target="1828" cy:directed="1"/>
      <edge id="19801" label="ENSMUSG00000022346 (TF-TG) ENSMUSG00000040483" source="2188" target="1827" cy:directed="1"/>
      <edge id="19800" label="ENSMUSG00000022346 (TF-TG) ENSMUSG00000040495" source="2188" target="1826" cy:directed="1"/>
      <edge id="19799" label="ENSMUSG00000022346 (TF-TG) ENSMUSG00000040528" source="2188" target="1250" cy:directed="1"/>
      <edge id="19798" label="ENSMUSG00000022346 (TF-TG) ENSMUSG00000040543" source="2188" target="1165" cy:directed="1"/>
      <edge id="19797" label="ENSMUSG00000022346 (TF-TG) ENSMUSG00000040563" source="2188" target="1446" cy:directed="1"/>
      <edge id="19796" label="ENSMUSG00000022346 (TF-TG) ENSMUSG00000040584" source="2188" target="727" cy:directed="1"/>
      <edge id="19795" label="ENSMUSG00000022346 (TF-TG) ENSMUSG00000040613" source="2188" target="726" cy:directed="1"/>
      <edge id="19794" label="ENSMUSG00000022346 (TF-TG) ENSMUSG00000040624" source="2188" target="1249" cy:directed="1"/>
      <edge id="19793" label="ENSMUSG00000022346 (TF-TG) ENSMUSG00000040694" source="2188" target="725" cy:directed="1"/>
      <edge id="19792" label="ENSMUSG00000022346 (TF-TG) ENSMUSG00000040710" source="2188" target="1825" cy:directed="1"/>
      <edge id="19791" label="ENSMUSG00000022346 (TF-TG) ENSMUSG00000040714" source="2188" target="724" cy:directed="1"/>
      <edge id="19790" label="ENSMUSG00000022346 (TF-TG) ENSMUSG00000040717" source="2188" target="1248" cy:directed="1"/>
      <edge id="19789" label="ENSMUSG00000022346 (TF-TG) ENSMUSG00000040723" source="2188" target="1824" cy:directed="1"/>
      <edge id="19788" label="ENSMUSG00000022346 (TF-TG) ENSMUSG00000040852" source="2188" target="1601" cy:directed="1"/>
      <edge id="19787" label="ENSMUSG00000022346 (TF-TG) ENSMUSG00000040856" source="2188" target="1823" cy:directed="1"/>
      <edge id="19786" label="ENSMUSG00000022346 (TF-TG) ENSMUSG00000040860" source="2188" target="1822" cy:directed="1"/>
      <edge id="19785" label="ENSMUSG00000022346 (TF-TG) ENSMUSG00000040891" source="2188" target="723" cy:directed="1"/>
      <edge id="19784" label="ENSMUSG00000022346 (TF-TG) ENSMUSG00000040918" source="2188" target="1821" cy:directed="1"/>
      <edge id="19783" label="ENSMUSG00000022346 (TF-TG) ENSMUSG00000040972" source="2188" target="722" cy:directed="1"/>
      <edge id="19782" label="ENSMUSG00000022346 (TF-TG) ENSMUSG00000040990" source="2188" target="1445" cy:directed="1"/>
      <edge id="19781" label="ENSMUSG00000022346 (TF-TG) ENSMUSG00000041000" source="2188" target="721" cy:directed="1"/>
      <edge id="19780" label="ENSMUSG00000022346 (TF-TG) ENSMUSG00000041064" source="2188" target="1820" cy:directed="1"/>
      <edge id="19779" label="ENSMUSG00000022346 (TF-TG) ENSMUSG00000041075" source="2188" target="1819" cy:directed="1"/>
      <edge id="19778" label="ENSMUSG00000022346 (TF-TG) ENSMUSG00000041117" source="2188" target="1818" cy:directed="1"/>
      <edge id="19777" label="ENSMUSG00000022346 (TF-TG) ENSMUSG00000041141" source="2188" target="1164" cy:directed="1"/>
      <edge id="19776" label="ENSMUSG00000022346 (TF-TG) ENSMUSG00000041147" source="2188" target="2193" cy:directed="1"/>
      <edge id="19775" label="ENSMUSG00000022346 (TF-TG) ENSMUSG00000041168" source="2188" target="1138" cy:directed="1"/>
      <edge id="19774" label="ENSMUSG00000022346 (TF-TG) ENSMUSG00000041261" source="2188" target="720" cy:directed="1"/>
      <edge id="19773" label="ENSMUSG00000022346 (TF-TG) ENSMUSG00000041268" source="2188" target="719" cy:directed="1"/>
      <edge id="19772" label="ENSMUSG00000022346 (TF-TG) ENSMUSG00000041293" source="2188" target="1817" cy:directed="1"/>
      <edge id="19771" label="ENSMUSG00000022346 (TF-TG) ENSMUSG00000041301" source="2188" target="718" cy:directed="1"/>
      <edge id="19770" label="ENSMUSG00000022346 (TF-TG) ENSMUSG00000041323" source="2188" target="717" cy:directed="1"/>
      <edge id="19769" label="ENSMUSG00000022346 (TF-TG) ENSMUSG00000041351" source="2188" target="716" cy:directed="1"/>
      <edge id="19768" label="ENSMUSG00000022346 (TF-TG) ENSMUSG00000041390" source="2188" target="1444" cy:directed="1"/>
      <edge id="19767" label="ENSMUSG00000022346 (TF-TG) ENSMUSG00000041406" source="2188" target="715" cy:directed="1"/>
      <edge id="19766" label="ENSMUSG00000022346 (TF-TG) ENSMUSG00000041420" source="2188" target="714" cy:directed="1"/>
      <edge id="19765" label="ENSMUSG00000022346 (TF-TG) ENSMUSG00000041431" source="2188" target="2161" cy:directed="1"/>
      <edge id="19764" label="ENSMUSG00000022346 (TF-TG) ENSMUSG00000041439" source="2188" target="1246" cy:directed="1"/>
      <edge id="19763" label="ENSMUSG00000022346 (TF-TG) ENSMUSG00000041476" source="2188" target="713" cy:directed="1"/>
      <edge id="19762" label="ENSMUSG00000022346 (TF-TG) ENSMUSG00000041498" source="2188" target="1816" cy:directed="1"/>
      <edge id="19761" label="ENSMUSG00000022346 (TF-TG) ENSMUSG00000041548" source="2188" target="1564" cy:directed="1"/>
      <edge id="19760" label="ENSMUSG00000022346 (TF-TG) ENSMUSG00000041577" source="2188" target="712" cy:directed="1"/>
      <edge id="19759" label="ENSMUSG00000022346 (TF-TG) ENSMUSG00000041608" source="2188" target="711" cy:directed="1"/>
      <edge id="19758" label="ENSMUSG00000022346 (TF-TG) ENSMUSG00000041633" source="2188" target="1600" cy:directed="1"/>
      <edge id="19757" label="ENSMUSG00000022346 (TF-TG) ENSMUSG00000041658" source="2188" target="710" cy:directed="1"/>
      <edge id="19756" label="ENSMUSG00000022346 (TF-TG) ENSMUSG00000041688" source="2188" target="709" cy:directed="1"/>
      <edge id="19755" label="ENSMUSG00000022346 (TF-TG) ENSMUSG00000041729" source="2188" target="708" cy:directed="1"/>
      <edge id="19754" label="ENSMUSG00000022346 (TF-TG) ENSMUSG00000041734" source="2188" target="707" cy:directed="1"/>
      <edge id="19753" label="ENSMUSG00000022346 (TF-TG) ENSMUSG00000041794" source="2188" target="706" cy:directed="1"/>
      <edge id="19752" label="ENSMUSG00000022346 (TF-TG) ENSMUSG00000041798" source="2188" target="1163" cy:directed="1"/>
      <edge id="19751" label="ENSMUSG00000022346 (TF-TG) ENSMUSG00000041801" source="2188" target="705" cy:directed="1"/>
      <edge id="19750" label="ENSMUSG00000022346 (TF-TG) ENSMUSG00000041836" source="2188" target="1563" cy:directed="1"/>
      <edge id="19749" label="ENSMUSG00000022346 (TF-TG) ENSMUSG00000041859" source="2188" target="1245" cy:directed="1"/>
      <edge id="19748" label="ENSMUSG00000022346 (TF-TG) ENSMUSG00000041889" source="2188" target="704" cy:directed="1"/>
      <edge id="19747" label="ENSMUSG00000022346 (TF-TG) ENSMUSG00000041974" source="2188" target="703" cy:directed="1"/>
      <edge id="19746" label="ENSMUSG00000022346 (TF-TG) ENSMUSG00000042029" source="2188" target="1815" cy:directed="1"/>
      <edge id="19745" label="ENSMUSG00000022346 (TF-TG) ENSMUSG00000042041" source="2188" target="702" cy:directed="1"/>
      <edge id="19744" label="ENSMUSG00000022346 (TF-TG) ENSMUSG00000042109" source="2188" target="1244" cy:directed="1"/>
      <edge id="19743" label="ENSMUSG00000022346 (TF-TG) ENSMUSG00000042115" source="2188" target="1562" cy:directed="1"/>
      <edge id="19742" label="ENSMUSG00000022346 (TF-TG) ENSMUSG00000042155" source="2188" target="1137" cy:directed="1"/>
      <edge id="19741" label="ENSMUSG00000022346 (TF-TG) ENSMUSG00000042179" source="2188" target="701" cy:directed="1"/>
      <edge id="19740" label="ENSMUSG00000022346 (TF-TG) ENSMUSG00000042213" source="2188" target="1814" cy:directed="1"/>
      <edge id="19739" label="ENSMUSG00000022346 (TF-TG) ENSMUSG00000042215" source="2188" target="700" cy:directed="1"/>
      <edge id="19738" label="ENSMUSG00000022346 (TF-TG) ENSMUSG00000042258" source="2188" target="1372" cy:directed="1"/>
      <edge id="19737" label="ENSMUSG00000022346 (TF-TG) ENSMUSG00000042303" source="2188" target="699" cy:directed="1"/>
      <edge id="19736" label="ENSMUSG00000022346 (TF-TG) ENSMUSG00000042306" source="2188" target="698" cy:directed="1"/>
      <edge id="19735" label="ENSMUSG00000022346 (TF-TG) ENSMUSG00000042371" source="2188" target="697" cy:directed="1"/>
      <edge id="19734" label="ENSMUSG00000022346 (TF-TG) ENSMUSG00000042404" source="2188" target="1549" cy:directed="1"/>
      <edge id="19733" label="ENSMUSG00000022346 (TF-TG) ENSMUSG00000042429" source="2188" target="1599" cy:directed="1"/>
      <edge id="19732" label="ENSMUSG00000022346 (TF-TG) ENSMUSG00000042462" source="2188" target="1813" cy:directed="1"/>
      <edge id="19731" label="ENSMUSG00000022346 (TF-TG) ENSMUSG00000042489" source="2188" target="1812" cy:directed="1"/>
      <edge id="19730" label="ENSMUSG00000022346 (TF-TG) ENSMUSG00000042515" source="2188" target="696" cy:directed="1"/>
      <edge id="19729" label="ENSMUSG00000022346 (TF-TG) ENSMUSG00000042532" source="2188" target="1136" cy:directed="1"/>
      <edge id="19728" label="ENSMUSG00000022346 (TF-TG) ENSMUSG00000042564" source="2188" target="1243" cy:directed="1"/>
      <edge id="19727" label="ENSMUSG00000022346 (TF-TG) ENSMUSG00000042631" source="2188" target="695" cy:directed="1"/>
      <edge id="19726" label="ENSMUSG00000022346 (TF-TG) ENSMUSG00000042684" source="2188" target="1811" cy:directed="1"/>
      <edge id="19725" label="ENSMUSG00000022346 (TF-TG) ENSMUSG00000042686" source="2188" target="1548" cy:directed="1"/>
      <edge id="19724" label="ENSMUSG00000022346 (TF-TG) ENSMUSG00000042712" source="2188" target="694" cy:directed="1"/>
      <edge id="19723" label="ENSMUSG00000022346 (TF-TG) ENSMUSG00000042734" source="2188" target="1598" cy:directed="1"/>
      <edge id="19722" label="ENSMUSG00000022346 (TF-TG) ENSMUSG00000042750" source="2188" target="693" cy:directed="1"/>
      <edge id="19721" label="ENSMUSG00000022346 (TF-TG) ENSMUSG00000042763" source="2188" target="692" cy:directed="1"/>
      <edge id="19720" label="ENSMUSG00000022346 (TF-TG) ENSMUSG00000042804" source="2188" target="691" cy:directed="1"/>
      <edge id="19719" label="ENSMUSG00000022346 (TF-TG) ENSMUSG00000042842" source="2188" target="690" cy:directed="1"/>
      <edge id="19718" label="ENSMUSG00000022346 (TF-TG) ENSMUSG00000042873" source="2188" target="1561" cy:directed="1"/>
      <edge id="19717" label="ENSMUSG00000022346 (TF-TG) ENSMUSG00000042942" source="2188" target="689" cy:directed="1"/>
      <edge id="19716" label="ENSMUSG00000022346 (TF-TG) ENSMUSG00000042985" source="2188" target="1810" cy:directed="1"/>
      <edge id="19715" label="ENSMUSG00000022346 (TF-TG) ENSMUSG00000043004" source="2188" target="1809" cy:directed="1"/>
      <edge id="19714" label="ENSMUSG00000022346 (TF-TG) ENSMUSG00000043015" source="2188" target="688" cy:directed="1"/>
      <edge id="19713" label="ENSMUSG00000022346 (TF-TG) ENSMUSG00000043029" source="2188" target="687" cy:directed="1"/>
      <edge id="19712" label="ENSMUSG00000022346 (TF-TG) ENSMUSG00000043068" source="2188" target="1597" cy:directed="1"/>
      <edge id="19711" label="ENSMUSG00000022346 (TF-TG) ENSMUSG00000043088" source="2188" target="1808" cy:directed="1"/>
      <edge id="19710" label="ENSMUSG00000022346 (TF-TG) ENSMUSG00000043154" source="2188" target="1807" cy:directed="1"/>
      <edge id="19709" label="ENSMUSG00000022346 (TF-TG) ENSMUSG00000043388" source="2188" target="686" cy:directed="1"/>
      <edge id="19708" label="ENSMUSG00000022346 (TF-TG) ENSMUSG00000043391" source="2188" target="1242" cy:directed="1"/>
      <edge id="19707" label="ENSMUSG00000022346 (TF-TG) ENSMUSG00000043419" source="2188" target="685" cy:directed="1"/>
      <edge id="19706" label="ENSMUSG00000022346 (TF-TG) ENSMUSG00000043439" source="2188" target="1806" cy:directed="1"/>
      <edge id="19705" label="ENSMUSG00000022346 (TF-TG) ENSMUSG00000043461" source="2188" target="684" cy:directed="1"/>
      <edge id="19704" label="ENSMUSG00000022346 (TF-TG) ENSMUSG00000043639" source="2188" target="1596" cy:directed="1"/>
      <edge id="19703" label="ENSMUSG00000022346 (TF-TG) ENSMUSG00000043885" source="2188" target="1240" cy:directed="1"/>
      <edge id="19702" label="ENSMUSG00000022346 (TF-TG) ENSMUSG00000043953" source="2188" target="1239" cy:directed="1"/>
      <edge id="19701" label="ENSMUSG00000022346 (TF-TG) ENSMUSG00000044005" source="2188" target="1805" cy:directed="1"/>
      <edge id="19700" label="ENSMUSG00000022346 (TF-TG) ENSMUSG00000044017" source="2188" target="683" cy:directed="1"/>
      <edge id="19699" label="ENSMUSG00000022346 (TF-TG) ENSMUSG00000044033" source="2188" target="682" cy:directed="1"/>
      <edge id="19698" label="ENSMUSG00000022346 (TF-TG) ENSMUSG00000044066" source="2188" target="1804" cy:directed="1"/>
      <edge id="19697" label="ENSMUSG00000022346 (TF-TG) ENSMUSG00000044072" source="2188" target="1443" cy:directed="1"/>
      <edge id="19696" label="ENSMUSG00000022346 (TF-TG) ENSMUSG00000044177" source="2188" target="1803" cy:directed="1"/>
      <edge id="19695" label="ENSMUSG00000022346 (TF-TG) ENSMUSG00000044288" source="2188" target="1371" cy:directed="1"/>
      <edge id="19694" label="ENSMUSG00000022346 (TF-TG) ENSMUSG00000044313" source="2188" target="681" cy:directed="1"/>
      <edge id="19693" label="ENSMUSG00000022346 (TF-TG) ENSMUSG00000044317" source="2188" target="1238" cy:directed="1"/>
      <edge id="19692" label="ENSMUSG00000022346 (TF-TG) ENSMUSG00000044337" source="2188" target="1442" cy:directed="1"/>
      <edge id="19691" label="ENSMUSG00000022346 (TF-TG) ENSMUSG00000044340" source="2188" target="1441" cy:directed="1"/>
      <edge id="19690" label="ENSMUSG00000022346 (TF-TG) ENSMUSG00000044348" source="2188" target="1801" cy:directed="1"/>
      <edge id="19689" label="ENSMUSG00000022346 (TF-TG) ENSMUSG00000044456" source="2188" target="1237" cy:directed="1"/>
      <edge id="19688" label="ENSMUSG00000022346 (TF-TG) ENSMUSG00000044468" source="2188" target="680" cy:directed="1"/>
      <edge id="19687" label="ENSMUSG00000022346 (TF-TG) ENSMUSG00000044548" source="2188" target="1800" cy:directed="1"/>
      <edge id="19686" label="ENSMUSG00000022346 (TF-TG) ENSMUSG00000044626" source="2188" target="679" cy:directed="1"/>
      <edge id="19685" label="ENSMUSG00000022346 (TF-TG) ENSMUSG00000044646" source="2188" target="678" cy:directed="1"/>
      <edge id="19684" label="ENSMUSG00000022346 (TF-TG) ENSMUSG00000044734" source="2188" target="1440" cy:directed="1"/>
      <edge id="19683" label="ENSMUSG00000022346 (TF-TG) ENSMUSG00000044912" source="2188" target="677" cy:directed="1"/>
      <edge id="19682" label="ENSMUSG00000022346 (TF-TG) ENSMUSG00000044933" source="2188" target="1439" cy:directed="1"/>
      <edge id="19681" label="ENSMUSG00000022346 (TF-TG) ENSMUSG00000044966" source="2188" target="1799" cy:directed="1"/>
      <edge id="19680" label="ENSMUSG00000022346 (TF-TG) ENSMUSG00000045007" source="2188" target="1438" cy:directed="1"/>
      <edge id="19679" label="ENSMUSG00000022346 (TF-TG) ENSMUSG00000045064" source="2188" target="676" cy:directed="1"/>
      <edge id="19678" label="ENSMUSG00000022346 (TF-TG) ENSMUSG00000045094" source="2188" target="1236" cy:directed="1"/>
      <edge id="19677" label="ENSMUSG00000022346 (TF-TG) ENSMUSG00000045165" source="2188" target="1798" cy:directed="1"/>
      <edge id="19676" label="ENSMUSG00000022346 (TF-TG) ENSMUSG00000045215" source="2188" target="675" cy:directed="1"/>
      <edge id="19675" label="ENSMUSG00000022346 (TF-TG) ENSMUSG00000045273" source="2188" target="674" cy:directed="1"/>
      <edge id="19674" label="ENSMUSG00000022346 (TF-TG) ENSMUSG00000045281" source="2188" target="673" cy:directed="1"/>
      <edge id="19673" label="ENSMUSG00000022346 (TF-TG) ENSMUSG00000045312" source="2188" target="1370" cy:directed="1"/>
      <edge id="19672" label="ENSMUSG00000022346 (TF-TG) ENSMUSG00000045328" source="2188" target="1235" cy:directed="1"/>
      <edge id="19671" label="ENSMUSG00000022346 (TF-TG) ENSMUSG00000045349" source="2188" target="1797" cy:directed="1"/>
      <edge id="19670" label="ENSMUSG00000022346 (TF-TG) ENSMUSG00000045518" source="2188" target="1369" cy:directed="1"/>
      <edge id="19669" label="ENSMUSG00000022346 (TF-TG) ENSMUSG00000045667" source="2188" target="1437" cy:directed="1"/>
      <edge id="19668" label="ENSMUSG00000022346 (TF-TG) ENSMUSG00000045751" source="2188" target="1436" cy:directed="1"/>
      <edge id="19667" label="ENSMUSG00000022346 (TF-TG) ENSMUSG00000045763" source="2188" target="672" cy:directed="1"/>
      <edge id="19666" label="ENSMUSG00000022346 (TF-TG) ENSMUSG00000045790" source="2188" target="671" cy:directed="1"/>
      <edge id="19665" label="ENSMUSG00000022346 (TF-TG) ENSMUSG00000045817" source="2188" target="1234" cy:directed="1"/>
      <edge id="19664" label="ENSMUSG00000022346 (TF-TG) ENSMUSG00000045838" source="2188" target="1595" cy:directed="1"/>
      <edge id="19663" label="ENSMUSG00000022346 (TF-TG) ENSMUSG00000045871" source="2188" target="670" cy:directed="1"/>
      <edge id="19662" label="ENSMUSG00000022346 (TF-TG) ENSMUSG00000045912" source="2188" target="669" cy:directed="1"/>
      <edge id="19661" label="ENSMUSG00000022346 (TF-TG) ENSMUSG00000045932" source="2188" target="1796" cy:directed="1"/>
      <edge id="19660" label="ENSMUSG00000022346 (TF-TG) ENSMUSG00000046058" source="2188" target="668" cy:directed="1"/>
      <edge id="19659" label="ENSMUSG00000022346 (TF-TG) ENSMUSG00000046070" source="2188" target="667" cy:directed="1"/>
      <edge id="19658" label="ENSMUSG00000022346 (TF-TG) ENSMUSG00000046160" source="2188" target="666" cy:directed="1"/>
      <edge id="19657" label="ENSMUSG00000022346 (TF-TG) ENSMUSG00000046178" source="2188" target="665" cy:directed="1"/>
      <edge id="19656" label="ENSMUSG00000022346 (TF-TG) ENSMUSG00000046204" source="2188" target="664" cy:directed="1"/>
      <edge id="19655" label="ENSMUSG00000022346 (TF-TG) ENSMUSG00000046215" source="2188" target="663" cy:directed="1"/>
      <edge id="19654" label="ENSMUSG00000022346 (TF-TG) ENSMUSG00000046223" source="2188" target="1795" cy:directed="1"/>
      <edge id="19653" label="ENSMUSG00000022346 (TF-TG) ENSMUSG00000046242" source="2188" target="1594" cy:directed="1"/>
      <edge id="19652" label="ENSMUSG00000022346 (TF-TG) ENSMUSG00000046295" source="2188" target="662" cy:directed="1"/>
      <edge id="19651" label="ENSMUSG00000022346 (TF-TG) ENSMUSG00000046352" source="2188" target="661" cy:directed="1"/>
      <edge id="19650" label="ENSMUSG00000022346 (TF-TG) ENSMUSG00000046402" source="2188" target="660" cy:directed="1"/>
      <edge id="19649" label="ENSMUSG00000022346 (TF-TG) ENSMUSG00000046410" source="2188" target="1232" cy:directed="1"/>
      <edge id="19648" label="ENSMUSG00000022346 (TF-TG) ENSMUSG00000046442" source="2188" target="659" cy:directed="1"/>
      <edge id="19647" label="ENSMUSG00000022346 (TF-TG) ENSMUSG00000046447" source="2188" target="1794" cy:directed="1"/>
      <edge id="19646" label="ENSMUSG00000022346 (TF-TG) ENSMUSG00000046460" source="2188" target="1547" cy:directed="1"/>
      <edge id="19645" label="ENSMUSG00000022346 (TF-TG) ENSMUSG00000046480" source="2188" target="658" cy:directed="1"/>
      <edge id="19644" label="ENSMUSG00000022346 (TF-TG) ENSMUSG00000046546" source="2188" target="1593" cy:directed="1"/>
      <edge id="19643" label="ENSMUSG00000022346 (TF-TG) ENSMUSG00000046589" source="2188" target="657" cy:directed="1"/>
      <edge id="19642" label="ENSMUSG00000022346 (TF-TG) ENSMUSG00000046591" source="2188" target="1793" cy:directed="1"/>
      <edge id="19641" label="ENSMUSG00000022346 (TF-TG) ENSMUSG00000046613" source="2188" target="656" cy:directed="1"/>
      <edge id="19640" label="ENSMUSG00000022346 (TF-TG) ENSMUSG00000046668" source="2188" target="1792" cy:directed="1"/>
      <edge id="19639" label="ENSMUSG00000022346 (TF-TG) ENSMUSG00000046711" source="2188" target="1231" cy:directed="1"/>
      <edge id="19638" label="ENSMUSG00000022346 (TF-TG) ENSMUSG00000046805" source="2188" target="1546" cy:directed="1"/>
      <edge id="19637" label="ENSMUSG00000022346 (TF-TG) ENSMUSG00000046841" source="2188" target="655" cy:directed="1"/>
      <edge id="19636" label="ENSMUSG00000022346 (TF-TG) ENSMUSG00000047003" source="2188" target="1791" cy:directed="1"/>
      <edge id="19635" label="ENSMUSG00000022346 (TF-TG) ENSMUSG00000047044" source="2188" target="1790" cy:directed="1"/>
      <edge id="19634" label="ENSMUSG00000022346 (TF-TG) ENSMUSG00000047109" source="2188" target="1789" cy:directed="1"/>
      <edge id="19633" label="ENSMUSG00000022346 (TF-TG) ENSMUSG00000047115" source="2188" target="1788" cy:directed="1"/>
      <edge id="19632" label="ENSMUSG00000022346 (TF-TG) ENSMUSG00000047139" source="2188" target="1230" cy:directed="1"/>
      <edge id="19631" label="ENSMUSG00000022346 (TF-TG) ENSMUSG00000047181" source="2188" target="1229" cy:directed="1"/>
      <edge id="19630" label="ENSMUSG00000022346 (TF-TG) ENSMUSG00000047205" source="2188" target="1787" cy:directed="1"/>
      <edge id="19629" label="ENSMUSG00000022346 (TF-TG) ENSMUSG00000047221" source="2188" target="1786" cy:directed="1"/>
      <edge id="19628" label="ENSMUSG00000022346 (TF-TG) ENSMUSG00000047230" source="2188" target="1435" cy:directed="1"/>
      <edge id="19627" label="ENSMUSG00000022346 (TF-TG) ENSMUSG00000047250" source="2188" target="1161" cy:directed="1"/>
      <edge id="19626" label="ENSMUSG00000022346 (TF-TG) ENSMUSG00000047298" source="2188" target="1592" cy:directed="1"/>
      <edge id="19625" label="ENSMUSG00000022346 (TF-TG) ENSMUSG00000047344" source="2188" target="654" cy:directed="1"/>
      <edge id="19624" label="ENSMUSG00000022346 (TF-TG) ENSMUSG00000047415" source="2188" target="1545" cy:directed="1"/>
      <edge id="19623" label="ENSMUSG00000022346 (TF-TG) ENSMUSG00000047473" source="2188" target="653" cy:directed="1"/>
      <edge id="19622" label="ENSMUSG00000022346 (TF-TG) ENSMUSG00000047501" source="2188" target="1785" cy:directed="1"/>
      <edge id="19621" label="ENSMUSG00000022346 (TF-TG) ENSMUSG00000047507" source="2188" target="1784" cy:directed="1"/>
      <edge id="19620" label="ENSMUSG00000022346 (TF-TG) ENSMUSG00000047534" source="2188" target="1783" cy:directed="1"/>
      <edge id="19619" label="ENSMUSG00000022346 (TF-TG) ENSMUSG00000047642" source="2188" target="1782" cy:directed="1"/>
      <edge id="19618" label="ENSMUSG00000022346 (TF-TG) ENSMUSG00000047702" source="2188" target="652" cy:directed="1"/>
      <edge id="19617" label="ENSMUSG00000022346 (TF-TG) ENSMUSG00000047730" source="2188" target="651" cy:directed="1"/>
      <edge id="19616" label="ENSMUSG00000022346 (TF-TG) ENSMUSG00000047757" source="2188" target="1781" cy:directed="1"/>
      <edge id="19615" label="ENSMUSG00000022346 (TF-TG) ENSMUSG00000047842" source="2188" target="1780" cy:directed="1"/>
      <edge id="19614" label="ENSMUSG00000022346 (TF-TG) ENSMUSG00000047867" source="2188" target="1779" cy:directed="1"/>
      <edge id="19613" label="ENSMUSG00000022346 (TF-TG) ENSMUSG00000047878" source="2188" target="1434" cy:directed="1"/>
      <edge id="19612" label="ENSMUSG00000022346 (TF-TG) ENSMUSG00000047907" source="2188" target="1591" cy:directed="1"/>
      <edge id="19611" label="ENSMUSG00000022346 (TF-TG) ENSMUSG00000047963" source="2188" target="650" cy:directed="1"/>
      <edge id="19610" label="ENSMUSG00000022346 (TF-TG) ENSMUSG00000047986" source="2188" target="1778" cy:directed="1"/>
      <edge id="19609" label="ENSMUSG00000022346 (TF-TG) ENSMUSG00000047996" source="2188" target="649" cy:directed="1"/>
      <edge id="19608" label="ENSMUSG00000022346 (TF-TG) ENSMUSG00000048022" source="2188" target="1228" cy:directed="1"/>
      <edge id="19607" label="ENSMUSG00000022346 (TF-TG) ENSMUSG00000048058" source="2188" target="1777" cy:directed="1"/>
      <edge id="19606" label="ENSMUSG00000022346 (TF-TG) ENSMUSG00000048078" source="2188" target="648" cy:directed="1"/>
      <edge id="19605" label="ENSMUSG00000022346 (TF-TG) ENSMUSG00000048148" source="2188" target="1776" cy:directed="1"/>
      <edge id="19604" label="ENSMUSG00000022346 (TF-TG) ENSMUSG00000048200" source="2188" target="647" cy:directed="1"/>
      <edge id="19603" label="ENSMUSG00000022346 (TF-TG) ENSMUSG00000048329" source="2188" target="1226" cy:directed="1"/>
      <edge id="19602" label="ENSMUSG00000022346 (TF-TG) ENSMUSG00000048330" source="2188" target="646" cy:directed="1"/>
      <edge id="19601" label="ENSMUSG00000022346 (TF-TG) ENSMUSG00000048349" source="2188" target="1368" cy:directed="1"/>
      <edge id="19600" label="ENSMUSG00000022346 (TF-TG) ENSMUSG00000048373" source="2188" target="1225" cy:directed="1"/>
      <edge id="19599" label="ENSMUSG00000022346 (TF-TG) ENSMUSG00000048450" source="2188" target="1775" cy:directed="1"/>
      <edge id="19598" label="ENSMUSG00000022346 (TF-TG) ENSMUSG00000048473" source="2188" target="1774" cy:directed="1"/>
      <edge id="19597" label="ENSMUSG00000022346 (TF-TG) ENSMUSG00000048612" source="2188" target="1224" cy:directed="1"/>
      <edge id="19596" label="ENSMUSG00000022346 (TF-TG) ENSMUSG00000048752" source="2188" target="1223" cy:directed="1"/>
      <edge id="19595" label="ENSMUSG00000022346 (TF-TG) ENSMUSG00000048776" source="2188" target="645" cy:directed="1"/>
      <edge id="19594" label="ENSMUSG00000022346 (TF-TG) ENSMUSG00000048779" source="2188" target="1773" cy:directed="1"/>
      <edge id="19593" label="ENSMUSG00000022346 (TF-TG) ENSMUSG00000048807" source="2188" target="644" cy:directed="1"/>
      <edge id="19592" label="ENSMUSG00000022346 (TF-TG) ENSMUSG00000048899" source="2188" target="643" cy:directed="1"/>
      <edge id="19591" label="ENSMUSG00000022346 (TF-TG) ENSMUSG00000048905" source="2188" target="642" cy:directed="1"/>
      <edge id="19590" label="ENSMUSG00000022346 (TF-TG) ENSMUSG00000048911" source="2188" target="641" cy:directed="1"/>
      <edge id="19589" label="ENSMUSG00000022346 (TF-TG) ENSMUSG00000048965" source="2188" target="1772" cy:directed="1"/>
      <edge id="19588" label="ENSMUSG00000022346 (TF-TG) ENSMUSG00000048970" source="2188" target="1590" cy:directed="1"/>
      <edge id="19587" label="ENSMUSG00000022346 (TF-TG) ENSMUSG00000049148" source="2188" target="1589" cy:directed="1"/>
      <edge id="19586" label="ENSMUSG00000022346 (TF-TG) ENSMUSG00000049154" source="2188" target="1160" cy:directed="1"/>
      <edge id="19585" label="ENSMUSG00000022346 (TF-TG) ENSMUSG00000049288" source="2188" target="1771" cy:directed="1"/>
      <edge id="19584" label="ENSMUSG00000022346 (TF-TG) ENSMUSG00000049307" source="2188" target="640" cy:directed="1"/>
      <edge id="19583" label="ENSMUSG00000022346 (TF-TG) ENSMUSG00000049313" source="2188" target="1221" cy:directed="1"/>
      <edge id="19582" label="ENSMUSG00000022346 (TF-TG) ENSMUSG00000049350" source="2188" target="1770" cy:directed="1"/>
      <edge id="19581" label="ENSMUSG00000022346 (TF-TG) ENSMUSG00000049436" source="2188" target="1220" cy:directed="1"/>
      <edge id="19580" label="ENSMUSG00000022346 (TF-TG) ENSMUSG00000049536" source="2188" target="639" cy:directed="1"/>
      <edge id="19579" label="ENSMUSG00000022346 (TF-TG) ENSMUSG00000049588" source="2188" target="1219" cy:directed="1"/>
      <edge id="19578" label="ENSMUSG00000022346 (TF-TG) ENSMUSG00000049608" source="2188" target="1433" cy:directed="1"/>
      <edge id="19577" label="ENSMUSG00000022346 (TF-TG) ENSMUSG00000049723" source="2188" target="1218" cy:directed="1"/>
      <edge id="19576" label="ENSMUSG00000022346 (TF-TG) ENSMUSG00000049807" source="2188" target="1432" cy:directed="1"/>
      <edge id="19575" label="ENSMUSG00000022346 (TF-TG) ENSMUSG00000049858" source="2188" target="1431" cy:directed="1"/>
      <edge id="19574" label="ENSMUSG00000022346 (TF-TG) ENSMUSG00000049892" source="2188" target="1769" cy:directed="1"/>
      <edge id="19573" label="ENSMUSG00000022346 (TF-TG) ENSMUSG00000049907" source="2188" target="1768" cy:directed="1"/>
      <edge id="19572" label="ENSMUSG00000022346 (TF-TG) ENSMUSG00000050052" source="2188" target="1767" cy:directed="1"/>
      <edge id="19571" label="ENSMUSG00000022346 (TF-TG) ENSMUSG00000050064" source="2188" target="1217" cy:directed="1"/>
      <edge id="19570" label="ENSMUSG00000022346 (TF-TG) ENSMUSG00000050132" source="2188" target="1766" cy:directed="1"/>
      <edge id="19569" label="ENSMUSG00000022346 (TF-TG) ENSMUSG00000050234" source="2188" target="638" cy:directed="1"/>
      <edge id="19568" label="ENSMUSG00000022346 (TF-TG) ENSMUSG00000050321" source="2188" target="637" cy:directed="1"/>
      <edge id="19567" label="ENSMUSG00000022346 (TF-TG) ENSMUSG00000050335" source="2188" target="1765" cy:directed="1"/>
      <edge id="19566" label="ENSMUSG00000022346 (TF-TG) ENSMUSG00000050357" source="2188" target="1764" cy:directed="1"/>
      <edge id="19565" label="ENSMUSG00000022346 (TF-TG) ENSMUSG00000050359" source="2188" target="636" cy:directed="1"/>
      <edge id="19564" label="ENSMUSG00000022346 (TF-TG) ENSMUSG00000050395" source="2188" target="1430" cy:directed="1"/>
      <edge id="19563" label="ENSMUSG00000022346 (TF-TG) ENSMUSG00000050410" source="2188" target="635" cy:directed="1"/>
      <edge id="19562" label="ENSMUSG00000022346 (TF-TG) ENSMUSG00000050447" source="2188" target="634" cy:directed="1"/>
      <edge id="19561" label="ENSMUSG00000022346 (TF-TG) ENSMUSG00000050473" source="2188" target="633" cy:directed="1"/>
      <edge id="19560" label="ENSMUSG00000022346 (TF-TG) ENSMUSG00000050505" source="2188" target="632" cy:directed="1"/>
      <edge id="19559" label="ENSMUSG00000022346 (TF-TG) ENSMUSG00000050511" source="2188" target="631" cy:directed="1"/>
      <edge id="19558" label="ENSMUSG00000022346 (TF-TG) ENSMUSG00000050520" source="2188" target="630" cy:directed="1"/>
      <edge id="19557" label="ENSMUSG00000022346 (TF-TG) ENSMUSG00000050711" source="2188" target="629" cy:directed="1"/>
      <edge id="19556" label="ENSMUSG00000022346 (TF-TG) ENSMUSG00000050751" source="2188" target="628" cy:directed="1"/>
      <edge id="19555" label="ENSMUSG00000022346 (TF-TG) ENSMUSG00000050824" source="2188" target="627" cy:directed="1"/>
      <edge id="19554" label="ENSMUSG00000022346 (TF-TG) ENSMUSG00000051003" source="2188" target="626" cy:directed="1"/>
      <edge id="19553" label="ENSMUSG00000022346 (TF-TG) ENSMUSG00000051043" source="2188" target="625" cy:directed="1"/>
      <edge id="19552" label="ENSMUSG00000022346 (TF-TG) ENSMUSG00000051067" source="2188" target="624" cy:directed="1"/>
      <edge id="19551" label="ENSMUSG00000022346 (TF-TG) ENSMUSG00000051111" source="2188" target="1588" cy:directed="1"/>
      <edge id="19550" label="ENSMUSG00000022346 (TF-TG) ENSMUSG00000051166" source="2188" target="1587" cy:directed="1"/>
      <edge id="19549" label="ENSMUSG00000022346 (TF-TG) ENSMUSG00000051209" source="2188" target="623" cy:directed="1"/>
      <edge id="19548" label="ENSMUSG00000022346 (TF-TG) ENSMUSG00000051220" source="2188" target="1763" cy:directed="1"/>
      <edge id="19547" label="ENSMUSG00000022346 (TF-TG) ENSMUSG00000051251" source="2188" target="622" cy:directed="1"/>
      <edge id="19546" label="ENSMUSG00000022346 (TF-TG) ENSMUSG00000051314" source="2188" target="621" cy:directed="1"/>
      <edge id="19545" label="ENSMUSG00000022346 (TF-TG) ENSMUSG00000051335" source="2188" target="1761" cy:directed="1"/>
      <edge id="19544" label="ENSMUSG00000022346 (TF-TG) ENSMUSG00000051359" source="2188" target="1427" cy:directed="1"/>
      <edge id="19543" label="ENSMUSG00000022346 (TF-TG) ENSMUSG00000051457" source="2188" target="1760" cy:directed="1"/>
      <edge id="19542" label="ENSMUSG00000022346 (TF-TG) ENSMUSG00000051498" source="2188" target="1543" cy:directed="1"/>
      <edge id="19541" label="ENSMUSG00000022346 (TF-TG) ENSMUSG00000051517" source="2188" target="620" cy:directed="1"/>
      <edge id="19540" label="ENSMUSG00000022346 (TF-TG) ENSMUSG00000051951" source="2188" target="619" cy:directed="1"/>
      <edge id="19539" label="ENSMUSG00000022346 (TF-TG) ENSMUSG00000051980" source="2188" target="618" cy:directed="1"/>
      <edge id="19538" label="ENSMUSG00000022346 (TF-TG) ENSMUSG00000052062" source="2188" target="617" cy:directed="1"/>
      <edge id="19537" label="ENSMUSG00000022346 (TF-TG) ENSMUSG00000052085" source="2188" target="1759" cy:directed="1"/>
      <edge id="19536" label="ENSMUSG00000022346 (TF-TG) ENSMUSG00000052087" source="2188" target="1758" cy:directed="1"/>
      <edge id="19535" label="ENSMUSG00000022346 (TF-TG) ENSMUSG00000052117" source="2188" target="1757" cy:directed="1"/>
      <edge id="19534" label="ENSMUSG00000022346 (TF-TG) ENSMUSG00000052135" source="2188" target="1756" cy:directed="1"/>
      <edge id="19533" label="ENSMUSG00000022346 (TF-TG) ENSMUSG00000052212" source="2188" target="616" cy:directed="1"/>
      <edge id="19532" label="ENSMUSG00000022346 (TF-TG) ENSMUSG00000052271" source="2188" target="615" cy:directed="1"/>
      <edge id="19531" label="ENSMUSG00000022346 (TF-TG) ENSMUSG00000052331" source="2188" target="1755" cy:directed="1"/>
      <edge id="19530" label="ENSMUSG00000022346 (TF-TG) ENSMUSG00000052353" source="2188" target="1367" cy:directed="1"/>
      <edge id="19529" label="ENSMUSG00000022346 (TF-TG) ENSMUSG00000052364" source="2188" target="614" cy:directed="1"/>
      <edge id="19528" label="ENSMUSG00000022346 (TF-TG) ENSMUSG00000052384" source="2188" target="1754" cy:directed="1"/>
      <edge id="19527" label="ENSMUSG00000022346 (TF-TG) ENSMUSG00000052631" source="2188" target="1215" cy:directed="1"/>
      <edge id="19526" label="ENSMUSG00000022346 (TF-TG) ENSMUSG00000052852" source="2188" target="613" cy:directed="1"/>
      <edge id="19525" label="ENSMUSG00000022346 (TF-TG) ENSMUSG00000052921" source="2188" target="612" cy:directed="1"/>
      <edge id="19524" label="ENSMUSG00000022346 (TF-TG) ENSMUSG00000053004" source="2188" target="611" cy:directed="1"/>
      <edge id="19523" label="ENSMUSG00000022346 (TF-TG) ENSMUSG00000053046" source="2188" target="610" cy:directed="1"/>
      <edge id="19522" label="ENSMUSG00000022346 (TF-TG) ENSMUSG00000053137" source="2188" target="1753" cy:directed="1"/>
      <edge id="19521" label="ENSMUSG00000022346 (TF-TG) ENSMUSG00000053158" source="2188" target="609" cy:directed="1"/>
      <edge id="19520" label="ENSMUSG00000022346 (TF-TG) ENSMUSG00000053182" source="2188" target="1214" cy:directed="1"/>
      <edge id="19519" label="ENSMUSG00000022346 (TF-TG) ENSMUSG00000053216" source="2188" target="1585" cy:directed="1"/>
      <edge id="19518" label="ENSMUSG00000022346 (TF-TG) ENSMUSG00000053219" source="2188" target="608" cy:directed="1"/>
      <edge id="19517" label="ENSMUSG00000022346 (TF-TG) ENSMUSG00000053279" source="2188" target="607" cy:directed="1"/>
      <edge id="19516" label="ENSMUSG00000022346 (TF-TG) ENSMUSG00000053310" source="2188" target="606" cy:directed="1"/>
      <edge id="19515" label="ENSMUSG00000022346 (TF-TG) ENSMUSG00000053334" source="2188" target="1752" cy:directed="1"/>
      <edge id="19514" label="ENSMUSG00000022346 (TF-TG) ENSMUSG00000053414" source="2188" target="1751" cy:directed="1"/>
      <edge id="19513" label="ENSMUSG00000022346 (TF-TG) ENSMUSG00000053460" source="2188" target="1750" cy:directed="1"/>
      <edge id="19512" label="ENSMUSG00000022346 (TF-TG) ENSMUSG00000053580" source="2188" target="1749" cy:directed="1"/>
      <edge id="19511" label="ENSMUSG00000022346 (TF-TG) ENSMUSG00000053581" source="2188" target="1748" cy:directed="1"/>
      <edge id="19510" label="ENSMUSG00000022346 (TF-TG) ENSMUSG00000053617" source="2188" target="1213" cy:directed="1"/>
      <edge id="19509" label="ENSMUSG00000022346 (TF-TG) ENSMUSG00000053702" source="2188" target="605" cy:directed="1"/>
      <edge id="19508" label="ENSMUSG00000022346 (TF-TG) ENSMUSG00000053765" source="2188" target="604" cy:directed="1"/>
      <edge id="19507" label="ENSMUSG00000022346 (TF-TG) ENSMUSG00000053846" source="2188" target="1426" cy:directed="1"/>
      <edge id="19506" label="ENSMUSG00000022346 (TF-TG) ENSMUSG00000053852" source="2188" target="603" cy:directed="1"/>
      <edge id="19505" label="ENSMUSG00000022346 (TF-TG) ENSMUSG00000053963" source="2188" target="1584" cy:directed="1"/>
      <edge id="19504" label="ENSMUSG00000022346 (TF-TG) ENSMUSG00000054034" source="2188" target="602" cy:directed="1"/>
      <edge id="19503" label="ENSMUSG00000022346 (TF-TG) ENSMUSG00000054146" source="2188" target="601" cy:directed="1"/>
      <edge id="19502" label="ENSMUSG00000022346 (TF-TG) ENSMUSG00000054200" source="2188" target="1212" cy:directed="1"/>
      <edge id="19501" label="ENSMUSG00000022346 (TF-TG) ENSMUSG00000054321" source="2188" target="1747" cy:directed="1"/>
      <edge id="19500" label="ENSMUSG00000022346 (TF-TG) ENSMUSG00000054342" source="2188" target="1746" cy:directed="1"/>
      <edge id="19499" label="ENSMUSG00000022346 (TF-TG) ENSMUSG00000054484" source="2188" target="600" cy:directed="1"/>
      <edge id="19498" label="ENSMUSG00000022346 (TF-TG) ENSMUSG00000054555" source="2188" target="599" cy:directed="1"/>
      <edge id="19497" label="ENSMUSG00000022346 (TF-TG) ENSMUSG00000054582" source="2188" target="1135" cy:directed="1"/>
      <edge id="19496" label="ENSMUSG00000022346 (TF-TG) ENSMUSG00000054612" source="2188" target="1745" cy:directed="1"/>
      <edge id="19495" label="ENSMUSG00000022346 (TF-TG) ENSMUSG00000054630" source="2188" target="598" cy:directed="1"/>
      <edge id="19494" label="ENSMUSG00000022346 (TF-TG) ENSMUSG00000054640" source="2188" target="1425" cy:directed="1"/>
      <edge id="19493" label="ENSMUSG00000022346 (TF-TG) ENSMUSG00000054659" source="2188" target="597" cy:directed="1"/>
      <edge id="19492" label="ENSMUSG00000022346 (TF-TG) ENSMUSG00000054717" source="2188" target="1744" cy:directed="1"/>
      <edge id="19491" label="ENSMUSG00000022346 (TF-TG) ENSMUSG00000054764" source="2188" target="596" cy:directed="1"/>
      <edge id="19490" label="ENSMUSG00000022346 (TF-TG) ENSMUSG00000054871" source="2188" target="1542" cy:directed="1"/>
      <edge id="19489" label="ENSMUSG00000022346 (TF-TG) ENSMUSG00000054893" source="2188" target="1743" cy:directed="1"/>
      <edge id="19488" label="ENSMUSG00000022346 (TF-TG) ENSMUSG00000054920" source="2188" target="1742" cy:directed="1"/>
      <edge id="19487" label="ENSMUSG00000022346 (TF-TG) ENSMUSG00000054932" source="2188" target="595" cy:directed="1"/>
      <edge id="19486" label="ENSMUSG00000022346 (TF-TG) ENSMUSG00000055172" source="2188" target="594" cy:directed="1"/>
      <edge id="19485" label="ENSMUSG00000022346 (TF-TG) ENSMUSG00000055210" source="2188" target="593" cy:directed="1"/>
      <edge id="19484" label="ENSMUSG00000022346 (TF-TG) ENSMUSG00000055296" source="2188" target="1741" cy:directed="1"/>
      <edge id="19483" label="ENSMUSG00000022346 (TF-TG) ENSMUSG00000055485" source="2188" target="1366" cy:directed="1"/>
      <edge id="19482" label="ENSMUSG00000022346 (TF-TG) ENSMUSG00000055493" source="2188" target="592" cy:directed="1"/>
      <edge id="19481" label="ENSMUSG00000022346 (TF-TG) ENSMUSG00000055567" source="2188" target="591" cy:directed="1"/>
      <edge id="19480" label="ENSMUSG00000022346 (TF-TG) ENSMUSG00000055610" source="2188" target="590" cy:directed="1"/>
      <edge id="19479" label="ENSMUSG00000022346 (TF-TG) ENSMUSG00000055612" source="2188" target="1740" cy:directed="1"/>
      <edge id="19478" label="ENSMUSG00000022346 (TF-TG) ENSMUSG00000055629" source="2188" target="589" cy:directed="1"/>
      <edge id="19477" label="ENSMUSG00000022346 (TF-TG) ENSMUSG00000055730" source="2188" target="588" cy:directed="1"/>
      <edge id="19476" label="ENSMUSG00000022346 (TF-TG) ENSMUSG00000055745" source="2188" target="587" cy:directed="1"/>
      <edge id="19475" label="ENSMUSG00000022346 (TF-TG) ENSMUSG00000055805" source="2188" target="1739" cy:directed="1"/>
      <edge id="19474" label="ENSMUSG00000022346 (TF-TG) ENSMUSG00000055809" source="2188" target="586" cy:directed="1"/>
      <edge id="19473" label="ENSMUSG00000022346 (TF-TG) ENSMUSG00000055862" source="2188" target="585" cy:directed="1"/>
      <edge id="19472" label="ENSMUSG00000022346 (TF-TG) ENSMUSG00000055912" source="2188" target="584" cy:directed="1"/>
      <edge id="19471" label="ENSMUSG00000022346 (TF-TG) ENSMUSG00000055976" source="2188" target="1211" cy:directed="1"/>
      <edge id="19470" label="ENSMUSG00000022346 (TF-TG) ENSMUSG00000055978" source="2188" target="583" cy:directed="1"/>
      <edge id="19469" label="ENSMUSG00000022346 (TF-TG) ENSMUSG00000055980" source="2188" target="582" cy:directed="1"/>
      <edge id="19468" label="ENSMUSG00000022346 (TF-TG) ENSMUSG00000056035" source="2188" target="581" cy:directed="1"/>
      <edge id="19467" label="ENSMUSG00000022346 (TF-TG) ENSMUSG00000056050" source="2188" target="580" cy:directed="1"/>
      <edge id="19466" label="ENSMUSG00000022346 (TF-TG) ENSMUSG00000056069" source="2188" target="1738" cy:directed="1"/>
      <edge id="19465" label="ENSMUSG00000022346 (TF-TG) ENSMUSG00000056185" source="2188" target="1737" cy:directed="1"/>
      <edge id="19464" label="ENSMUSG00000022346 (TF-TG) ENSMUSG00000056222" source="2188" target="1583" cy:directed="1"/>
      <edge id="19463" label="ENSMUSG00000022346 (TF-TG) ENSMUSG00000056531" source="2188" target="1582" cy:directed="1"/>
      <edge id="19462" label="ENSMUSG00000022346 (TF-TG) ENSMUSG00000056602" source="2188" target="1736" cy:directed="1"/>
      <edge id="19461" label="ENSMUSG00000022346 (TF-TG) ENSMUSG00000056648" source="2188" target="579" cy:directed="1"/>
      <edge id="19460" label="ENSMUSG00000022346 (TF-TG) ENSMUSG00000056724" source="2188" target="578" cy:directed="1"/>
      <edge id="19459" label="ENSMUSG00000022346 (TF-TG) ENSMUSG00000056758" source="2188" target="1355" cy:directed="1"/>
      <edge id="19458" label="ENSMUSG00000022346 (TF-TG) ENSMUSG00000056888" source="2188" target="1735" cy:directed="1"/>
      <edge id="19457" label="ENSMUSG00000022346 (TF-TG) ENSMUSG00000057069" source="2188" target="1734" cy:directed="1"/>
      <edge id="19456" label="ENSMUSG00000022346 (TF-TG) ENSMUSG00000057092" source="2188" target="577" cy:directed="1"/>
      <edge id="19455" label="ENSMUSG00000022346 (TF-TG) ENSMUSG00000057137" source="2188" target="1733" cy:directed="1"/>
      <edge id="19454" label="ENSMUSG00000022346 (TF-TG) ENSMUSG00000057182" source="2188" target="576" cy:directed="1"/>
      <edge id="19453" label="ENSMUSG00000022346 (TF-TG) ENSMUSG00000057335" source="2188" target="1732" cy:directed="1"/>
      <edge id="19452" label="ENSMUSG00000022346 (TF-TG) ENSMUSG00000057400" source="2188" target="575" cy:directed="1"/>
      <edge id="19451" label="ENSMUSG00000022346 (TF-TG) ENSMUSG00000057406" source="2188" target="574" cy:directed="1"/>
      <edge id="19450" label="ENSMUSG00000022346 (TF-TG) ENSMUSG00000057541" source="2188" target="573" cy:directed="1"/>
      <edge id="19449" label="ENSMUSG00000022346 (TF-TG) ENSMUSG00000057604" source="2188" target="572" cy:directed="1"/>
      <edge id="19448" label="ENSMUSG00000022346 (TF-TG) ENSMUSG00000057614" source="2188" target="571" cy:directed="1"/>
      <edge id="19447" label="ENSMUSG00000022346 (TF-TG) ENSMUSG00000057716" source="2188" target="1365" cy:directed="1"/>
      <edge id="19446" label="ENSMUSG00000022346 (TF-TG) ENSMUSG00000057897" source="2188" target="570" cy:directed="1"/>
      <edge id="19445" label="ENSMUSG00000022346 (TF-TG) ENSMUSG00000057933" source="2188" target="569" cy:directed="1"/>
      <edge id="19444" label="ENSMUSG00000022346 (TF-TG) ENSMUSG00000058006" source="2188" target="1731" cy:directed="1"/>
      <edge id="19443" label="ENSMUSG00000022346 (TF-TG) ENSMUSG00000058063" source="2188" target="568" cy:directed="1"/>
      <edge id="19442" label="ENSMUSG00000022346 (TF-TG) ENSMUSG00000058070" source="2188" target="1158" cy:directed="1"/>
      <edge id="19441" label="ENSMUSG00000022346 (TF-TG) ENSMUSG00000058135" source="2188" target="1730" cy:directed="1"/>
      <edge id="19440" label="ENSMUSG00000022346 (TF-TG) ENSMUSG00000058145" source="2188" target="1729" cy:directed="1"/>
      <edge id="19439" label="ENSMUSG00000022346 (TF-TG) ENSMUSG00000058216" source="2188" target="1209" cy:directed="1"/>
      <edge id="19438" label="ENSMUSG00000022346 (TF-TG) ENSMUSG00000058290" source="2188" target="1728" cy:directed="1"/>
      <edge id="19437" label="ENSMUSG00000022346 (TF-TG) ENSMUSG00000058297" source="2188" target="1581" cy:directed="1"/>
      <edge id="19436" label="ENSMUSG00000022346 (TF-TG) ENSMUSG00000058392" source="2188" target="567" cy:directed="1"/>
      <edge id="19435" label="ENSMUSG00000022346 (TF-TG) ENSMUSG00000058624" source="2188" target="1580" cy:directed="1"/>
      <edge id="19434" label="ENSMUSG00000022346 (TF-TG) ENSMUSG00000058672" source="2188" target="1208" cy:directed="1"/>
      <edge id="19433" label="ENSMUSG00000022346 (TF-TG) ENSMUSG00000058740" source="2188" target="566" cy:directed="1"/>
      <edge id="19432" label="ENSMUSG00000022346 (TF-TG) ENSMUSG00000058799" source="2188" target="1727" cy:directed="1"/>
      <edge id="19431" label="ENSMUSG00000022346 (TF-TG) ENSMUSG00000058975" source="2188" target="1726" cy:directed="1"/>
      <edge id="19430" label="ENSMUSG00000022346 (TF-TG) ENSMUSG00000059013" source="2188" target="1725" cy:directed="1"/>
      <edge id="19429" label="ENSMUSG00000022346 (TF-TG) ENSMUSG00000059060" source="2188" target="1423" cy:directed="1"/>
      <edge id="19428" label="ENSMUSG00000022346 (TF-TG) ENSMUSG00000059149" source="2188" target="565" cy:directed="1"/>
      <edge id="19427" label="ENSMUSG00000022346 (TF-TG) ENSMUSG00000059406" source="2188" target="564" cy:directed="1"/>
      <edge id="19426" label="ENSMUSG00000022346 (TF-TG) ENSMUSG00000059412" source="2188" target="1422" cy:directed="1"/>
      <edge id="19425" label="ENSMUSG00000022346 (TF-TG) ENSMUSG00000059493" source="2188" target="563" cy:directed="1"/>
      <edge id="19424" label="ENSMUSG00000022346 (TF-TG) ENSMUSG00000059588" source="2188" target="1397" cy:directed="1"/>
      <edge id="19423" label="ENSMUSG00000022346 (TF-TG) ENSMUSG00000059713" source="2188" target="1723" cy:directed="1"/>
      <edge id="19422" label="ENSMUSG00000022346 (TF-TG) ENSMUSG00000059742" source="2188" target="1579" cy:directed="1"/>
      <edge id="19421" label="ENSMUSG00000022346 (TF-TG) ENSMUSG00000059939" source="2188" target="1722" cy:directed="1"/>
      <edge id="19420" label="ENSMUSG00000022346 (TF-TG) ENSMUSG00000059991" source="2188" target="1578" cy:directed="1"/>
      <edge id="19419" label="ENSMUSG00000022346 (TF-TG) ENSMUSG00000060063" source="2188" target="1721" cy:directed="1"/>
      <edge id="19418" label="ENSMUSG00000022346 (TF-TG) ENSMUSG00000060208" source="2188" target="562" cy:directed="1"/>
      <edge id="19417" label="ENSMUSG00000022346 (TF-TG) ENSMUSG00000060429" source="2188" target="1207" cy:directed="1"/>
      <edge id="19416" label="ENSMUSG00000022346 (TF-TG) ENSMUSG00000060519" source="2188" target="1206" cy:directed="1"/>
      <edge id="19415" label="ENSMUSG00000022346 (TF-TG) ENSMUSG00000060548" source="2188" target="1205" cy:directed="1"/>
      <edge id="19414" label="ENSMUSG00000022346 (TF-TG) ENSMUSG00000060550" source="2188" target="1720" cy:directed="1"/>
      <edge id="19413" label="ENSMUSG00000022346 (TF-TG) ENSMUSG00000060600" source="2188" target="561" cy:directed="1"/>
      <edge id="19412" label="ENSMUSG00000022346 (TF-TG) ENSMUSG00000060615" source="2188" target="560" cy:directed="1"/>
      <edge id="19411" label="ENSMUSG00000022346 (TF-TG) ENSMUSG00000060671" source="2188" target="1421" cy:directed="1"/>
      <edge id="19410" label="ENSMUSG00000022346 (TF-TG) ENSMUSG00000060961" source="2188" target="559" cy:directed="1"/>
      <edge id="19409" label="ENSMUSG00000022346 (TF-TG) ENSMUSG00000061292" source="2188" target="558" cy:directed="1"/>
      <edge id="19408" label="ENSMUSG00000022346 (TF-TG) ENSMUSG00000061414" source="2188" target="1719" cy:directed="1"/>
      <edge id="19407" label="ENSMUSG00000022346 (TF-TG) ENSMUSG00000061455" source="2188" target="1420" cy:directed="1"/>
      <edge id="19406" label="ENSMUSG00000022346 (TF-TG) ENSMUSG00000061462" source="2188" target="557" cy:directed="1"/>
      <edge id="19405" label="ENSMUSG00000022346 (TF-TG) ENSMUSG00000061601" source="2188" target="556" cy:directed="1"/>
      <edge id="19404" label="ENSMUSG00000022346 (TF-TG) ENSMUSG00000061607" source="2188" target="1718" cy:directed="1"/>
      <edge id="19403" label="ENSMUSG00000022346 (TF-TG) ENSMUSG00000061718" source="2188" target="1717" cy:directed="1"/>
      <edge id="19402" label="ENSMUSG00000022346 (TF-TG) ENSMUSG00000062070" source="2188" target="1716" cy:directed="1"/>
      <edge id="19401" label="ENSMUSG00000022346 (TF-TG) ENSMUSG00000062078" source="2188" target="1363" cy:directed="1"/>
      <edge id="19400" label="ENSMUSG00000022346 (TF-TG) ENSMUSG00000062184" source="2188" target="555" cy:directed="1"/>
      <edge id="19399" label="ENSMUSG00000022346 (TF-TG) ENSMUSG00000062210" source="2188" target="554" cy:directed="1"/>
      <edge id="19398" label="ENSMUSG00000022346 (TF-TG) ENSMUSG00000062248" source="2188" target="1714" cy:directed="1"/>
      <edge id="19397" label="ENSMUSG00000022346 (TF-TG) ENSMUSG00000062252" source="2188" target="553" cy:directed="1"/>
      <edge id="19396" label="ENSMUSG00000022346 (TF-TG) ENSMUSG00000062410" source="2188" target="552" cy:directed="1"/>
      <edge id="19395" label="ENSMUSG00000022346 (TF-TG) ENSMUSG00000062760" source="2188" target="1713" cy:directed="1"/>
      <edge id="19394" label="ENSMUSG00000022346 (TF-TG) ENSMUSG00000062826" source="2188" target="551" cy:directed="1"/>
      <edge id="19393" label="ENSMUSG00000022346 (TF-TG) ENSMUSG00000062859" source="2188" target="1577" cy:directed="1"/>
      <edge id="19392" label="ENSMUSG00000022346 (TF-TG) ENSMUSG00000062995" source="2188" target="550" cy:directed="1"/>
      <edge id="19391" label="ENSMUSG00000022346 (TF-TG) ENSMUSG00000063142" source="2188" target="549" cy:directed="1"/>
      <edge id="19390" label="ENSMUSG00000022346 (TF-TG) ENSMUSG00000063568" source="2188" target="1362" cy:directed="1"/>
      <edge id="19389" label="ENSMUSG00000022346 (TF-TG) ENSMUSG00000063704" source="2188" target="548" cy:directed="1"/>
      <edge id="19388" label="ENSMUSG00000022346 (TF-TG) ENSMUSG00000063727" source="2188" target="547" cy:directed="1"/>
      <edge id="19387" label="ENSMUSG00000022346 (TF-TG) ENSMUSG00000063810" source="2188" target="1134" cy:directed="1"/>
      <edge id="19386" label="ENSMUSG00000022346 (TF-TG) ENSMUSG00000063851" source="2188" target="546" cy:directed="1"/>
      <edge id="19385" label="ENSMUSG00000022346 (TF-TG) ENSMUSG00000063929" source="2188" target="545" cy:directed="1"/>
      <edge id="19384" label="ENSMUSG00000022346 (TF-TG) ENSMUSG00000064080" source="2188" target="544" cy:directed="1"/>
      <edge id="19383" label="ENSMUSG00000022346 (TF-TG) ENSMUSG00000064090" source="2188" target="1576" cy:directed="1"/>
      <edge id="19382" label="ENSMUSG00000022346 (TF-TG) ENSMUSG00000064109" source="2188" target="543" cy:directed="1"/>
      <edge id="19381" label="ENSMUSG00000022346 (TF-TG) ENSMUSG00000064140" source="2188" target="1203" cy:directed="1"/>
      <edge id="19380" label="ENSMUSG00000022346 (TF-TG) ENSMUSG00000064158" source="2188" target="542" cy:directed="1"/>
      <edge id="19379" label="ENSMUSG00000022346 (TF-TG) ENSMUSG00000064165" source="2188" target="541" cy:directed="1"/>
      <edge id="19378" label="ENSMUSG00000022346 (TF-TG) ENSMUSG00000064177" source="2188" target="540" cy:directed="1"/>
      <edge id="19377" label="ENSMUSG00000022346 (TF-TG) ENSMUSG00000064215" source="2188" target="1712" cy:directed="1"/>
      <edge id="19376" label="ENSMUSG00000022346 (TF-TG) ENSMUSG00000064262" source="2188" target="1711" cy:directed="1"/>
      <edge id="19375" label="ENSMUSG00000022346 (TF-TG) ENSMUSG00000064267" source="2188" target="1419" cy:directed="1"/>
      <edge id="19374" label="ENSMUSG00000022346 (TF-TG) ENSMUSG00000064272" source="2188" target="1157" cy:directed="1"/>
      <edge id="19373" label="ENSMUSG00000022346 (TF-TG) ENSMUSG00000064326" source="2188" target="539" cy:directed="1"/>
      <edge id="19372" label="ENSMUSG00000022346 (TF-TG) ENSMUSG00000065952" source="2188" target="1202" cy:directed="1"/>
      <edge id="19371" label="ENSMUSG00000022346 (TF-TG) ENSMUSG00000066152" source="2188" target="1541" cy:directed="1"/>
      <edge id="19370" label="ENSMUSG00000022346 (TF-TG) ENSMUSG00000066191" source="2188" target="538" cy:directed="1"/>
      <edge id="19369" label="ENSMUSG00000022346 (TF-TG) ENSMUSG00000066324" source="2188" target="1201" cy:directed="1"/>
      <edge id="19368" label="ENSMUSG00000022346 (TF-TG) ENSMUSG00000066607" source="2188" target="537" cy:directed="1"/>
      <edge id="19367" label="ENSMUSG00000022346 (TF-TG) ENSMUSG00000066705" source="2188" target="1418" cy:directed="1"/>
      <edge id="19366" label="ENSMUSG00000022346 (TF-TG) ENSMUSG00000066720" source="2188" target="1156" cy:directed="1"/>
      <edge id="19365" label="ENSMUSG00000022346 (TF-TG) ENSMUSG00000066952" source="2188" target="1575" cy:directed="1"/>
      <edge id="19364" label="ENSMUSG00000022346 (TF-TG) ENSMUSG00000067750" source="2188" target="536" cy:directed="1"/>
      <edge id="19363" label="ENSMUSG00000022346 (TF-TG) ENSMUSG00000067813" source="2188" target="1710" cy:directed="1"/>
      <edge id="19362" label="ENSMUSG00000022346 (TF-TG) ENSMUSG00000067818" source="2188" target="535" cy:directed="1"/>
      <edge id="19361" label="ENSMUSG00000022346 (TF-TG) ENSMUSG00000067925" source="2188" target="1574" cy:directed="1"/>
      <edge id="19360" label="ENSMUSG00000022346 (TF-TG) ENSMUSG00000068101" source="2188" target="1417" cy:directed="1"/>
      <edge id="19359" label="ENSMUSG00000022346 (TF-TG) ENSMUSG00000068154" source="2188" target="534" cy:directed="1"/>
      <edge id="19358" label="ENSMUSG00000022346 (TF-TG) ENSMUSG00000068196" source="2188" target="1361" cy:directed="1"/>
      <edge id="19357" label="ENSMUSG00000022346 (TF-TG) ENSMUSG00000068270" source="2188" target="533" cy:directed="1"/>
      <edge id="19356" label="ENSMUSG00000022346 (TF-TG) ENSMUSG00000068735" source="2188" target="1416" cy:directed="1"/>
      <edge id="19355" label="ENSMUSG00000022346 (TF-TG) ENSMUSG00000068877" source="2188" target="1199" cy:directed="1"/>
      <edge id="19354" label="ENSMUSG00000022346 (TF-TG) ENSMUSG00000069114" source="2188" target="1415" cy:directed="1"/>
      <edge id="19353" label="ENSMUSG00000022346 (TF-TG) ENSMUSG00000069184" source="2188" target="1198" cy:directed="1"/>
      <edge id="19352" label="ENSMUSG00000022346 (TF-TG) ENSMUSG00000069227" source="2188" target="1540" cy:directed="1"/>
      <edge id="19351" label="ENSMUSG00000022346 (TF-TG) ENSMUSG00000069255" source="2188" target="1360" cy:directed="1"/>
      <edge id="19350" label="ENSMUSG00000022346 (TF-TG) ENSMUSG00000069515" source="2188" target="1197" cy:directed="1"/>
      <edge id="19349" label="ENSMUSG00000022346 (TF-TG) ENSMUSG00000069792" source="2188" target="532" cy:directed="1"/>
      <edge id="19348" label="ENSMUSG00000022346 (TF-TG) ENSMUSG00000069793" source="2188" target="1196" cy:directed="1"/>
      <edge id="19347" label="ENSMUSG00000022346 (TF-TG) ENSMUSG00000069805" source="2188" target="1195" cy:directed="1"/>
      <edge id="19346" label="ENSMUSG00000022346 (TF-TG) ENSMUSG00000069814" source="2188" target="1539" cy:directed="1"/>
      <edge id="19345" label="ENSMUSG00000022346 (TF-TG) ENSMUSG00000069910" source="2188" target="1709" cy:directed="1"/>
      <edge id="19344" label="ENSMUSG00000022346 (TF-TG) ENSMUSG00000069920" source="2188" target="531" cy:directed="1"/>
      <edge id="19343" label="ENSMUSG00000022346 (TF-TG) ENSMUSG00000069922" source="2188" target="530" cy:directed="1"/>
      <edge id="19342" label="ENSMUSG00000022346 (TF-TG) ENSMUSG00000070034" source="2188" target="529" cy:directed="1"/>
      <edge id="19341" label="ENSMUSG00000022346 (TF-TG) ENSMUSG00000070284" source="2188" target="1708" cy:directed="1"/>
      <edge id="19340" label="ENSMUSG00000022346 (TF-TG) ENSMUSG00000070287" source="2188" target="1573" cy:directed="1"/>
      <edge id="19339" label="ENSMUSG00000022346 (TF-TG) ENSMUSG00000070337" source="2188" target="1414" cy:directed="1"/>
      <edge id="19338" label="ENSMUSG00000022346 (TF-TG) ENSMUSG00000070348" source="2188" target="2174" cy:directed="1"/>
      <edge id="19337" label="ENSMUSG00000022346 (TF-TG) ENSMUSG00000070366" source="2188" target="528" cy:directed="1"/>
      <edge id="19336" label="ENSMUSG00000022346 (TF-TG) ENSMUSG00000070407" source="2188" target="1413" cy:directed="1"/>
      <edge id="19335" label="ENSMUSG00000022346 (TF-TG) ENSMUSG00000070423" source="2188" target="527" cy:directed="1"/>
      <edge id="19334" label="ENSMUSG00000022346 (TF-TG) ENSMUSG00000070498" source="2188" target="1707" cy:directed="1"/>
      <edge id="19333" label="ENSMUSG00000022346 (TF-TG) ENSMUSG00000070532" source="2188" target="1572" cy:directed="1"/>
      <edge id="19332" label="ENSMUSG00000022346 (TF-TG) ENSMUSG00000070576" source="2188" target="1706" cy:directed="1"/>
      <edge id="19331" label="ENSMUSG00000022346 (TF-TG) ENSMUSG00000070577" source="2188" target="526" cy:directed="1"/>
      <edge id="19330" label="ENSMUSG00000022346 (TF-TG) ENSMUSG00000070687" source="2188" target="525" cy:directed="1"/>
      <edge id="19329" label="ENSMUSG00000022346 (TF-TG) ENSMUSG00000070733" source="2188" target="1705" cy:directed="1"/>
      <edge id="19328" label="ENSMUSG00000022346 (TF-TG) ENSMUSG00000070802" source="2188" target="1704" cy:directed="1"/>
      <edge id="19327" label="ENSMUSG00000022346 (TF-TG) ENSMUSG00000070867" source="2188" target="1359" cy:directed="1"/>
      <edge id="19326" label="ENSMUSG00000022346 (TF-TG) ENSMUSG00000071203" source="2188" target="1193" cy:directed="1"/>
      <edge id="19325" label="ENSMUSG00000022346 (TF-TG) ENSMUSG00000071226" source="2188" target="524" cy:directed="1"/>
      <edge id="19324" label="ENSMUSG00000022346 (TF-TG) ENSMUSG00000071537" source="2188" target="1192" cy:directed="1"/>
      <edge id="19323" label="ENSMUSG00000022346 (TF-TG) ENSMUSG00000071547" source="2188" target="1703" cy:directed="1"/>
      <edge id="19322" label="ENSMUSG00000022346 (TF-TG) ENSMUSG00000071551" source="2188" target="523" cy:directed="1"/>
      <edge id="19321" label="ENSMUSG00000022346 (TF-TG) ENSMUSG00000071553" source="2188" target="522" cy:directed="1"/>
      <edge id="19320" label="ENSMUSG00000022346 (TF-TG) ENSMUSG00000071719" source="2188" target="1412" cy:directed="1"/>
      <edge id="19319" label="ENSMUSG00000022346 (TF-TG) ENSMUSG00000071847" source="2188" target="521" cy:directed="1"/>
      <edge id="19318" label="ENSMUSG00000022346 (TF-TG) ENSMUSG00000071856" source="2188" target="520" cy:directed="1"/>
      <edge id="19317" label="ENSMUSG00000022346 (TF-TG) ENSMUSG00000071984" source="2188" target="519" cy:directed="1"/>
      <edge id="19316" label="ENSMUSG00000022346 (TF-TG) ENSMUSG00000072082" source="2188" target="1411" cy:directed="1"/>
      <edge id="19315" label="ENSMUSG00000022346 (TF-TG) ENSMUSG00000072115" source="2188" target="1702" cy:directed="1"/>
      <edge id="19314" label="ENSMUSG00000022346 (TF-TG) ENSMUSG00000072235" source="2188" target="1701" cy:directed="1"/>
      <edge id="19313" label="ENSMUSG00000022346 (TF-TG) ENSMUSG00000072294" source="2188" target="518" cy:directed="1"/>
      <edge id="19312" label="ENSMUSG00000022346 (TF-TG) ENSMUSG00000072620" source="2188" target="1410" cy:directed="1"/>
      <edge id="19311" label="ENSMUSG00000022346 (TF-TG) ENSMUSG00000072623" source="2188" target="517" cy:directed="1"/>
      <edge id="19310" label="ENSMUSG00000022346 (TF-TG) ENSMUSG00000072812" source="2188" target="516" cy:directed="1"/>
      <edge id="19309" label="ENSMUSG00000022346 (TF-TG) ENSMUSG00000072849" source="2188" target="515" cy:directed="1"/>
      <edge id="19308" label="ENSMUSG00000022346 (TF-TG) ENSMUSG00000072875" source="2188" target="514" cy:directed="1"/>
      <edge id="19307" label="ENSMUSG00000022346 (TF-TG) ENSMUSG00000073043" source="2188" target="1131" cy:directed="1"/>
      <edge id="19306" label="ENSMUSG00000022346 (TF-TG) ENSMUSG00000073207" source="2188" target="1191" cy:directed="1"/>
      <edge id="19305" label="ENSMUSG00000022346 (TF-TG) ENSMUSG00000073293" source="2188" target="513" cy:directed="1"/>
      <edge id="19304" label="ENSMUSG00000022346 (TF-TG) ENSMUSG00000073409" source="2188" target="1700" cy:directed="1"/>
      <edge id="19303" label="ENSMUSG00000022346 (TF-TG) ENSMUSG00000073530" source="2188" target="512" cy:directed="1"/>
      <edge id="19302" label="ENSMUSG00000022346 (TF-TG) ENSMUSG00000073680" source="2188" target="511" cy:directed="1"/>
      <edge id="19301" label="ENSMUSG00000022346 (TF-TG) ENSMUSG00000073705" source="2188" target="510" cy:directed="1"/>
      <edge id="19300" label="ENSMUSG00000022346 (TF-TG) ENSMUSG00000073889" source="2188" target="509" cy:directed="1"/>
      <edge id="19299" label="ENSMUSG00000022346 (TF-TG) ENSMUSG00000074004" source="2188" target="508" cy:directed="1"/>
      <edge id="19298" label="ENSMUSG00000022346 (TF-TG) ENSMUSG00000074063" source="2188" target="1699" cy:directed="1"/>
      <edge id="19297" label="ENSMUSG00000022346 (TF-TG) ENSMUSG00000074183" source="2188" target="1538" cy:directed="1"/>
      <edge id="19296" label="ENSMUSG00000022346 (TF-TG) ENSMUSG00000074217" source="2188" target="1698" cy:directed="1"/>
      <edge id="19295" label="ENSMUSG00000022346 (TF-TG) ENSMUSG00000074345" source="2188" target="1190" cy:directed="1"/>
      <edge id="19294" label="ENSMUSG00000022346 (TF-TG) ENSMUSG00000074476" source="2188" target="1697" cy:directed="1"/>
      <edge id="19293" label="ENSMUSG00000022346 (TF-TG) ENSMUSG00000074604" source="2188" target="1696" cy:directed="1"/>
      <edge id="19292" label="ENSMUSG00000022346 (TF-TG) ENSMUSG00000074625" source="2188" target="507" cy:directed="1"/>
      <edge id="19291" label="ENSMUSG00000022346 (TF-TG) ENSMUSG00000074651" source="2188" target="506" cy:directed="1"/>
      <edge id="19290" label="ENSMUSG00000022346 (TF-TG) ENSMUSG00000074652" source="2188" target="1358" cy:directed="1"/>
      <edge id="19289" label="ENSMUSG00000022346 (TF-TG) ENSMUSG00000074715" source="2188" target="1695" cy:directed="1"/>
      <edge id="19288" label="ENSMUSG00000022346 (TF-TG) ENSMUSG00000074785" source="2188" target="1694" cy:directed="1"/>
      <edge id="19287" label="ENSMUSG00000022346 (TF-TG) ENSMUSG00000074802" source="2188" target="1693" cy:directed="1"/>
      <edge id="19286" label="ENSMUSG00000022346 (TF-TG) ENSMUSG00000074825" source="2188" target="505" cy:directed="1"/>
      <edge id="19285" label="ENSMUSG00000022346 (TF-TG) ENSMUSG00000074867" source="2188" target="504" cy:directed="1"/>
      <edge id="19284" label="ENSMUSG00000022346 (TF-TG) ENSMUSG00000074882" source="2188" target="503" cy:directed="1"/>
      <edge id="19283" label="ENSMUSG00000022346 (TF-TG) ENSMUSG00000074892" source="2188" target="1692" cy:directed="1"/>
      <edge id="19282" label="ENSMUSG00000022346 (TF-TG) ENSMUSG00000074896" source="2188" target="1189" cy:directed="1"/>
      <edge id="19281" label="ENSMUSG00000022346 (TF-TG) ENSMUSG00000075012" source="2188" target="502" cy:directed="1"/>
      <edge id="19280" label="ENSMUSG00000022346 (TF-TG) ENSMUSG00000075270" source="2188" target="501" cy:directed="1"/>
      <edge id="19279" label="ENSMUSG00000022346 (TF-TG) ENSMUSG00000075289" source="2188" target="500" cy:directed="1"/>
      <edge id="19278" label="ENSMUSG00000022346 (TF-TG) ENSMUSG00000075502" source="2188" target="1691" cy:directed="1"/>
      <edge id="19277" label="ENSMUSG00000022346 (TF-TG) ENSMUSG00000075543" source="2188" target="1690" cy:directed="1"/>
      <edge id="19276" label="ENSMUSG00000022346 (TF-TG) ENSMUSG00000075610" source="2188" target="499" cy:directed="1"/>
      <edge id="19275" label="ENSMUSG00000022346 (TF-TG) ENSMUSG00000075702" source="2188" target="1409" cy:directed="1"/>
      <edge id="19274" label="ENSMUSG00000022346 (TF-TG) ENSMUSG00000078185" source="2188" target="498" cy:directed="1"/>
      <edge id="19273" label="ENSMUSG00000022346 (TF-TG) ENSMUSG00000078202" source="2188" target="1689" cy:directed="1"/>
      <edge id="19272" label="ENSMUSG00000022346 (TF-TG) ENSMUSG00000078234" source="2188" target="497" cy:directed="1"/>
      <edge id="19271" label="ENSMUSG00000022346 (TF-TG) ENSMUSG00000078349" source="2188" target="1408" cy:directed="1"/>
      <edge id="19270" label="ENSMUSG00000022346 (TF-TG) ENSMUSG00000078485" source="2188" target="496" cy:directed="1"/>
      <edge id="19269" label="ENSMUSG00000022346 (TF-TG) ENSMUSG00000078502" source="2188" target="495" cy:directed="1"/>
      <edge id="19268" label="ENSMUSG00000022346 (TF-TG) ENSMUSG00000078521" source="2188" target="494" cy:directed="1"/>
      <edge id="19267" label="ENSMUSG00000022346 (TF-TG) ENSMUSG00000078612" source="2188" target="1688" cy:directed="1"/>
      <edge id="19266" label="ENSMUSG00000022346 (TF-TG) ENSMUSG00000078650" source="2188" target="1687" cy:directed="1"/>
      <edge id="19265" label="ENSMUSG00000022346 (TF-TG) ENSMUSG00000078773" source="2188" target="1686" cy:directed="1"/>
      <edge id="19264" label="ENSMUSG00000022346 (TF-TG) ENSMUSG00000078776" source="2188" target="493" cy:directed="1"/>
      <edge id="19263" label="ENSMUSG00000022346 (TF-TG) ENSMUSG00000078949" source="2188" target="1407" cy:directed="1"/>
      <edge id="19262" label="ENSMUSG00000022346 (TF-TG) ENSMUSG00000078984" source="2188" target="1188" cy:directed="1"/>
      <edge id="19261" label="ENSMUSG00000022346 (TF-TG) ENSMUSG00000079015" source="2188" target="492" cy:directed="1"/>
      <edge id="19260" label="ENSMUSG00000022346 (TF-TG) ENSMUSG00000079037" source="2188" target="1685" cy:directed="1"/>
      <edge id="19259" label="ENSMUSG00000022346 (TF-TG) ENSMUSG00000079038" source="2188" target="1406" cy:directed="1"/>
      <edge id="19258" label="ENSMUSG00000022346 (TF-TG) ENSMUSG00000079056" source="2188" target="491" cy:directed="1"/>
      <edge id="19257" label="ENSMUSG00000022346 (TF-TG) ENSMUSG00000079339" source="2188" target="1684" cy:directed="1"/>
      <edge id="19256" label="ENSMUSG00000022346 (TF-TG) ENSMUSG00000079442" source="2188" target="1187" cy:directed="1"/>
      <edge id="19255" label="ENSMUSG00000022346 (TF-TG) ENSMUSG00000079471" source="2188" target="1405" cy:directed="1"/>
      <edge id="19254" label="ENSMUSG00000022346 (TF-TG) ENSMUSG00000079497" source="2188" target="490" cy:directed="1"/>
      <edge id="19253" label="ENSMUSG00000022346 (TF-TG) ENSMUSG00000079553" source="2188" target="1683" cy:directed="1"/>
      <edge id="19252" label="ENSMUSG00000022346 (TF-TG) ENSMUSG00000079654" source="2188" target="1186" cy:directed="1"/>
      <edge id="19251" label="ENSMUSG00000022346 (TF-TG) ENSMUSG00000079685" source="2188" target="1404" cy:directed="1"/>
      <edge id="19250" label="ENSMUSG00000022346 (TF-TG) ENSMUSG00000081769" source="2188" target="489" cy:directed="1"/>
      <edge id="19249" label="ENSMUSG00000022346 (TF-TG) ENSMUSG00000083282" source="2188" target="488" cy:directed="1"/>
      <edge id="19248" label="ENSMUSG00000022346 (TF-TG) ENSMUSG00000087230" source="2188" target="487" cy:directed="1"/>
      <edge id="19247" label="ENSMUSG00000022346 (TF-TG) ENSMUSG00000087651" source="2188" target="1682" cy:directed="1"/>
      <edge id="19246" label="ENSMUSG00000022346 (TF-TG) ENSMUSG00000089789" source="2188" target="1403" cy:directed="1"/>
      <edge id="19245" label="ENSMUSG00000022346 (TF-TG) ENSMUSG00000089901" source="2188" target="486" cy:directed="1"/>
      <edge id="19244" label="ENSMUSG00000022346 (TF-TG) ENSMUSG00000090291" source="2188" target="485" cy:directed="1"/>
      <edge id="19243" label="ENSMUSG00000022346 (TF-TG) ENSMUSG00000090626" source="2188" target="1402" cy:directed="1"/>
      <edge id="19242" label="ENSMUSG00000022346 (TF-TG) ENSMUSG00000091243" source="2188" target="484" cy:directed="1"/>
      <edge id="19241" label="ENSMUSG00000022346 (TF-TG) ENSMUSG00000091721" source="2188" target="483" cy:directed="1"/>
      <edge id="19240" label="ENSMUSG00000022346 (TF-TG) ENSMUSG00000092083" source="2188" target="1357" cy:directed="1"/>
      <edge id="19239" label="ENSMUSG00000022346 (TF-TG) ENSMUSG00000092486" source="2188" target="1401" cy:directed="1"/>
      <edge id="19238" label="ENSMUSG00000022346 (TF-TG) ENSMUSG00000094305" source="2188" target="482" cy:directed="1"/>
      <edge id="19237" label="ENSMUSG00000022346 (TF-TG) ENSMUSG00000094626" source="2188" target="1155" cy:directed="1"/>
      <edge id="19236" label="ENSMUSG00000022346 (TF-TG) ENSMUSG00000094928" source="2188" target="1681" cy:directed="1"/>
      <edge id="19235" label="ENSMUSG00000022346 (TF-TG) ENSMUSG00000095567" source="2188" target="481" cy:directed="1"/>
      <edge id="19234" label="ENSMUSG00000022346 (TF-TG) ENSMUSG00000095930" source="2188" target="480" cy:directed="1"/>
      <edge id="19233" label="ENSMUSG00000022346 (TF-TG) ENSMUSG00000096054" source="2188" target="1400" cy:directed="1"/>
      <edge id="19232" label="ENSMUSG00000022346 (TF-TG) ENSMUSG00000096146" source="2188" target="479" cy:directed="1"/>
      <edge id="19231" label="ENSMUSG00000022346 (TF-TG) ENSMUSG00000096847" source="2188" target="1680" cy:directed="1"/>
      <edge id="19230" label="ENSMUSG00000022346 (TF-TG) ENSMUSG00000098557" source="2188" target="1399" cy:directed="1"/>
      <edge id="19229" label="ENSMUSG00000022346 (TF-TG) ENSMUSG00000101605" source="2188" target="1184" cy:directed="1"/>
      <edge id="19228" label="ENSMUSG00000022346 (TF-TG) ENSMUSG00000103392" source="2188" target="478" cy:directed="1"/>
      <edge id="19227" label="ENSMUSG00000022346 (TF-TG) ENSMUSG00000108348" source="2188" target="1679" cy:directed="1"/>
      <edge id="19226" label="ENSMUSG00000022346 (TF-TG) ENSMUSG00000110105" source="2188" target="1678" cy:directed="1"/>
      <edge id="19225" label="ENSMUSG00000022346 (TF-TG) ENSMUSG00000110206" source="2188" target="1677" cy:directed="1"/>
      <edge id="19224" label="ENSMUSG00000022346 (TF-TG) ENSMUSG00000111709" source="2188" target="477" cy:directed="1"/>
      <edge id="19223" label="ENSMUSG00000022346 (TF-lincRNA) ENSMUSG00000084797" source="2188" target="260" cy:directed="1"/>
      <edge id="19222" label="ENSMUSG00000022346 (TF-lincRNA) ENSMUSG00000103965" source="2188" target="259" cy:directed="1"/>
      <edge id="19221" label="ENSMUSG00000022346 (TF-lincRNA) ENSMUSG00000105146" source="2188" target="258" cy:directed="1"/>
      <edge id="19220" label="ENSMUSG00000022346 (TF-lincRNA) ENSMUSG00000085183" source="2188" target="256" cy:directed="1"/>
      <edge id="19219" label="ENSMUSG00000022346 (TF-lincRNA) ENSMUSG00000103043" source="2188" target="255" cy:directed="1"/>
      <edge id="19218" label="ENSMUSG00000022346 (TF-lincRNA) ENSMUSG00000097561" source="2188" target="253" cy:directed="1"/>
      <edge id="19217" label="ENSMUSG00000022346 (TF-lincRNA) ENSMUSG00000103067" source="2188" target="252" cy:directed="1"/>
      <edge id="19216" label="ENSMUSG00000022346 (TF-lincRNA) ENSMUSG00000111043" source="2188" target="250" cy:directed="1"/>
      <edge id="19215" label="ENSMUSG00000022346 (TF-lincRNA) ENSMUSG00000029878" source="2188" target="249" cy:directed="1"/>
      <edge id="19214" label="ENSMUSG00000022346 (TF-lincRNA) ENSMUSG00000097709" source="2188" target="248" cy:directed="1"/>
      <edge id="19213" label="ENSMUSG00000022346 (TF-lincRNA) ENSMUSG00000100022" source="2188" target="247" cy:directed="1"/>
      <edge id="19212" label="ENSMUSG00000022346 (TF-lincRNA) ENSMUSG00000097932" source="2188" target="245" cy:directed="1"/>
      <edge id="19211" label="ENSMUSG00000022346 (TF-lincRNA) ENSMUSG00000099552" source="2188" target="244" cy:directed="1"/>
      <edge id="19210" label="ENSMUSG00000022346 (TF-lincRNA) ENSMUSG00000097284" source="2188" target="243" cy:directed="1"/>
      <edge id="19209" label="ENSMUSG00000022346 (TF-lincRNA) ENSMUSG00000110276" source="2188" target="242" cy:directed="1"/>
      <edge id="19208" label="ENSMUSG00000022346 (TF-lincRNA) ENSMUSG00000097415" source="2188" target="239" cy:directed="1"/>
      <edge id="19207" label="ENSMUSG00000022346 (TF-lincRNA) ENSMUSG00000069713" source="2188" target="238" cy:directed="1"/>
      <edge id="19206" label="ENSMUSG00000022346 (TF-lincRNA) ENSMUSG00000110866" source="2188" target="237" cy:directed="1"/>
      <edge id="19205" label="ENSMUSG00000022346 (TF-lincRNA) ENSMUSG00000099025" source="2188" target="236" cy:directed="1"/>
      <edge id="19204" label="ENSMUSG00000022346 (TF-lincRNA) ENSMUSG00000111528" source="2188" target="235" cy:directed="1"/>
      <edge id="19203" label="ENSMUSG00000022346 (TF-lincRNA) ENSMUSG00000085152" source="2188" target="233" cy:directed="1"/>
      <edge id="19202" label="ENSMUSG00000022346 (TF-lincRNA) ENSMUSG00000102123" source="2188" target="232" cy:directed="1"/>
      <edge id="19201" label="ENSMUSG00000022346 (TF-lincRNA) ENSMUSG00000075010" source="2188" target="230" cy:directed="1"/>
      <edge id="19200" label="ENSMUSG00000022346 (TF-lincRNA) ENSMUSG00000097632" source="2188" target="229" cy:directed="1"/>
      <edge id="19199" label="ENSMUSG00000022346 (TF-lincRNA) ENSMUSG00000087196" source="2188" target="228" cy:directed="1"/>
      <edge id="19198" label="ENSMUSG00000022346 (TF-lincRNA) ENSMUSG00000086141" source="2188" target="227" cy:directed="1"/>
      <edge id="19197" label="ENSMUSG00000022346 (TF-lincRNA) ENSMUSG00000085329" source="2188" target="226" cy:directed="1"/>
      <edge id="19196" label="ENSMUSG00000022346 (TF-lincRNA) ENSMUSG00000097515" source="2188" target="225" cy:directed="1"/>
      <edge id="19195" label="ENSMUSG00000022346 (TF-lincRNA) ENSMUSG00000086847" source="2188" target="223" cy:directed="1"/>
      <edge id="19194" label="ENSMUSG00000022346 (TF-miRNA) mmu-miR-101c" source="2188" target="222" cy:directed="1"/>
      <edge id="19193" label="ENSMUSG00000022346 (TF-miRNA) mmu-miR-1945" source="2188" target="221" cy:directed="1"/>
      <edge id="19192" label="ENSMUSG00000027490 (TF-TG) ENSMUSG00000002109" source="2186" target="2173" cy:directed="1"/>
      <edge id="19191" label="ENSMUSG00000027490 (TF-TG) ENSMUSG00000006398" source="2186" target="2172" cy:directed="1"/>
      <edge id="19190" label="ENSMUSG00000027490 (TF-TG) ENSMUSG00000006678" source="2186" target="2171" cy:directed="1"/>
      <edge id="19189" label="ENSMUSG00000027490 (TF-TG) ENSMUSG00000017499" source="2186" target="2170" cy:directed="1"/>
      <edge id="19188" label="ENSMUSG00000027490 (TF-TG) ENSMUSG00000017861" source="2186" target="2192" cy:directed="1"/>
      <edge id="19187" label="ENSMUSG00000027490 (TF-TG) ENSMUSG00000019942" source="2186" target="2169" cy:directed="1"/>
      <edge id="19186" label="ENSMUSG00000027490 (TF-TG) ENSMUSG00000022346" source="2186" target="2188" cy:directed="1"/>
      <edge id="19185" label="ENSMUSG00000027490 (TF-TG) ENSMUSG00000027342" source="2186" target="2168" cy:directed="1"/>
      <edge id="19184" label="ENSMUSG00000027490 (TF-TG) ENSMUSG00000027602" source="2186" target="2167" cy:directed="1"/>
      <edge id="19183" label="ENSMUSG00000027490 (TF-TG) ENSMUSG00000027641" source="2186" target="2166" cy:directed="1"/>
      <edge id="19182" label="ENSMUSG00000027490 (TF-TG) ENSMUSG00000027715" source="2186" target="2165" cy:directed="1"/>
      <edge id="19181" label="ENSMUSG00000027490 (TF-TG) ENSMUSG00000028884" source="2186" target="2164" cy:directed="1"/>
      <edge id="19180" label="ENSMUSG00000027490 (TF-TG) ENSMUSG00000029521" source="2186" target="2163" cy:directed="1"/>
      <edge id="19179" label="ENSMUSG00000027490 (TF-TG) ENSMUSG00000032380" source="2186" target="2162" cy:directed="1"/>
      <edge id="19178" label="ENSMUSG00000027490 (TF-TG) ENSMUSG00000041431" source="2186" target="2161" cy:directed="1"/>
      <edge id="19177" label="ENSMUSG00000027490 (TF-TG) ENSMUSG00000054115" source="2186" target="2160" cy:directed="1"/>
      <edge id="19176" label="ENSMUSG00000027490 (TF-TG) ENSMUSG00000000555" source="2186" target="1352" cy:directed="1"/>
      <edge id="19175" label="ENSMUSG00000027490 (TF-TG) ENSMUSG00000000594" source="2186" target="2150" cy:directed="1"/>
      <edge id="19174" label="ENSMUSG00000027490 (TF-TG) ENSMUSG00000000884" source="2186" target="1122" cy:directed="1"/>
      <edge id="19173" label="ENSMUSG00000027490 (TF-TG) ENSMUSG00000001025" source="2186" target="1535" cy:directed="1"/>
      <edge id="19172" label="ENSMUSG00000027490 (TF-TG) ENSMUSG00000001120" source="2186" target="2149" cy:directed="1"/>
      <edge id="19171" label="ENSMUSG00000027490 (TF-TG) ENSMUSG00000001517" source="2186" target="1674" cy:directed="1"/>
      <edge id="19170" label="ENSMUSG00000027490 (TF-TG) ENSMUSG00000001525" source="2186" target="1118" cy:directed="1"/>
      <edge id="19169" label="ENSMUSG00000027490 (TF-TG) ENSMUSG00000002055" source="2186" target="1153" cy:directed="1"/>
      <edge id="19168" label="ENSMUSG00000027490 (TF-TG) ENSMUSG00000002227" source="2186" target="2147" cy:directed="1"/>
      <edge id="19167" label="ENSMUSG00000027490 (TF-TG) ENSMUSG00000002835" source="2186" target="2144" cy:directed="1"/>
      <edge id="19166" label="ENSMUSG00000027490 (TF-TG) ENSMUSG00000002885" source="2186" target="2142" cy:directed="1"/>
      <edge id="19165" label="ENSMUSG00000027490 (TF-TG) ENSMUSG00000002997" source="2186" target="2141" cy:directed="1"/>
      <edge id="19164" label="ENSMUSG00000027490 (TF-TG) ENSMUSG00000003134" source="2186" target="2139" cy:directed="1"/>
      <edge id="19163" label="ENSMUSG00000027490 (TF-TG) ENSMUSG00000003541" source="2186" target="1346" cy:directed="1"/>
      <edge id="19162" label="ENSMUSG00000027490 (TF-TG) ENSMUSG00000004099" source="2186" target="1570" cy:directed="1"/>
      <edge id="19161" label="ENSMUSG00000027490 (TF-TG) ENSMUSG00000004151" source="2186" target="2135" cy:directed="1"/>
      <edge id="19160" label="ENSMUSG00000027490 (TF-TG) ENSMUSG00000004366" source="2186" target="1665" cy:directed="1"/>
      <edge id="19159" label="ENSMUSG00000027490 (TF-TG) ENSMUSG00000004952" source="2186" target="1344" cy:directed="1"/>
      <edge id="19158" label="ENSMUSG00000027490 (TF-TG) ENSMUSG00000005370" source="2186" target="2133" cy:directed="1"/>
      <edge id="19157" label="ENSMUSG00000027490 (TF-TG) ENSMUSG00000005410" source="2186" target="2132" cy:directed="1"/>
      <edge id="19156" label="ENSMUSG00000027490 (TF-TG) ENSMUSG00000005873" source="2186" target="1343" cy:directed="1"/>
      <edge id="19155" label="ENSMUSG00000027490 (TF-TG) ENSMUSG00000006435" source="2186" target="1663" cy:directed="1"/>
      <edge id="19154" label="ENSMUSG00000027490 (TF-TG) ENSMUSG00000006494" source="2186" target="2129" cy:directed="1"/>
      <edge id="19153" label="ENSMUSG00000027490 (TF-TG) ENSMUSG00000006675" source="2186" target="1100" cy:directed="1"/>
      <edge id="19152" label="ENSMUSG00000027490 (TF-TG) ENSMUSG00000006715" source="2186" target="2128" cy:directed="1"/>
      <edge id="19151" label="ENSMUSG00000027490 (TF-TG) ENSMUSG00000006784" source="2186" target="2127" cy:directed="1"/>
      <edge id="19150" label="ENSMUSG00000027490 (TF-TG) ENSMUSG00000006930" source="2186" target="1530" cy:directed="1"/>
      <edge id="19149" label="ENSMUSG00000027490 (TF-TG) ENSMUSG00000009092" source="2186" target="1341" cy:directed="1"/>
      <edge id="19148" label="ENSMUSG00000027490 (TF-TG) ENSMUSG00000009575" source="2186" target="2123" cy:directed="1"/>
      <edge id="19147" label="ENSMUSG00000027490 (TF-TG) ENSMUSG00000010830" source="2186" target="1661" cy:directed="1"/>
      <edge id="19146" label="ENSMUSG00000027490 (TF-TG) ENSMUSG00000012017" source="2186" target="1338" cy:directed="1"/>
      <edge id="19145" label="ENSMUSG00000027490 (TF-TG) ENSMUSG00000012443" source="2186" target="2120" cy:directed="1"/>
      <edge id="19144" label="ENSMUSG00000027490 (TF-TG) ENSMUSG00000013921" source="2186" target="1088" cy:directed="1"/>
      <edge id="19143" label="ENSMUSG00000027490 (TF-TG) ENSMUSG00000014351" source="2186" target="1659" cy:directed="1"/>
      <edge id="19142" label="ENSMUSG00000027490 (TF-TG) ENSMUSG00000014786" source="2186" target="2119" cy:directed="1"/>
      <edge id="19141" label="ENSMUSG00000027490 (TF-TG) ENSMUSG00000015468" source="2186" target="1356" cy:directed="1"/>
      <edge id="19140" label="ENSMUSG00000027490 (TF-TG) ENSMUSG00000015745" source="2186" target="2118" cy:directed="1"/>
      <edge id="19139" label="ENSMUSG00000027490 (TF-TG) ENSMUSG00000016526" source="2186" target="2116" cy:directed="1"/>
      <edge id="19138" label="ENSMUSG00000027490 (TF-TG) ENSMUSG00000017165" source="2186" target="2115" cy:directed="1"/>
      <edge id="19137" label="ENSMUSG00000027490 (TF-TG) ENSMUSG00000017204" source="2186" target="1083" cy:directed="1"/>
      <edge id="19136" label="ENSMUSG00000027490 (TF-TG) ENSMUSG00000017446" source="2186" target="2114" cy:directed="1"/>
      <edge id="19135" label="ENSMUSG00000027490 (TF-TG) ENSMUSG00000017466" source="2186" target="2113" cy:directed="1"/>
      <edge id="19134" label="ENSMUSG00000027490 (TF-TG) ENSMUSG00000017639" source="2186" target="1080" cy:directed="1"/>
      <edge id="19133" label="ENSMUSG00000027490 (TF-TG) ENSMUSG00000017652" source="2186" target="1658" cy:directed="1"/>
      <edge id="19132" label="ENSMUSG00000027490 (TF-TG) ENSMUSG00000017716" source="2186" target="2110" cy:directed="1"/>
      <edge id="19131" label="ENSMUSG00000027490 (TF-TG) ENSMUSG00000018486" source="2186" target="1075" cy:directed="1"/>
      <edge id="19130" label="ENSMUSG00000027490 (TF-TG) ENSMUSG00000018554" source="2186" target="1074" cy:directed="1"/>
      <edge id="19129" label="ENSMUSG00000027490 (TF-TG) ENSMUSG00000018899" source="2186" target="2190" cy:directed="1"/>
      <edge id="19128" label="ENSMUSG00000027490 (TF-TG) ENSMUSG00000019066" source="2186" target="2107" cy:directed="1"/>
      <edge id="19127" label="ENSMUSG00000027490 (TF-TG) ENSMUSG00000019188" source="2186" target="1526" cy:directed="1"/>
      <edge id="19126" label="ENSMUSG00000027490 (TF-TG) ENSMUSG00000019302" source="2186" target="2106" cy:directed="1"/>
      <edge id="19125" label="ENSMUSG00000027490 (TF-TG) ENSMUSG00000019303" source="2186" target="2105" cy:directed="1"/>
      <edge id="19124" label="ENSMUSG00000027490 (TF-TG) ENSMUSG00000019564" source="2186" target="2104" cy:directed="1"/>
      <edge id="19123" label="ENSMUSG00000027490 (TF-TG) ENSMUSG00000019773" source="2186" target="2103" cy:directed="1"/>
      <edge id="19122" label="ENSMUSG00000027490 (TF-TG) ENSMUSG00000019796" source="2186" target="2102" cy:directed="1"/>
      <edge id="19121" label="ENSMUSG00000027490 (TF-TG) ENSMUSG00000019876" source="2186" target="1067" cy:directed="1"/>
      <edge id="19120" label="ENSMUSG00000027490 (TF-TG) ENSMUSG00000019888" source="2186" target="373" cy:directed="1"/>
      <edge id="19119" label="ENSMUSG00000027490 (TF-TG) ENSMUSG00000019947" source="2186" target="2100" cy:directed="1"/>
      <edge id="19118" label="ENSMUSG00000027490 (TF-TG) ENSMUSG00000019986" source="2186" target="2098" cy:directed="1"/>
      <edge id="19117" label="ENSMUSG00000027490 (TF-TG) ENSMUSG00000019992" source="2186" target="1061" cy:directed="1"/>
      <edge id="19116" label="ENSMUSG00000027490 (TF-TG) ENSMUSG00000020034" source="2186" target="2097" cy:directed="1"/>
      <edge id="19115" label="ENSMUSG00000027490 (TF-TG) ENSMUSG00000020135" source="2186" target="1523" cy:directed="1"/>
      <edge id="19114" label="ENSMUSG00000027490 (TF-TG) ENSMUSG00000020143" source="2186" target="470" cy:directed="1"/>
      <edge id="19113" label="ENSMUSG00000027490 (TF-TG) ENSMUSG00000020151" source="2186" target="1056" cy:directed="1"/>
      <edge id="19112" label="ENSMUSG00000027490 (TF-TG) ENSMUSG00000020424" source="2186" target="1520" cy:directed="1"/>
      <edge id="19111" label="ENSMUSG00000027490 (TF-TG) ENSMUSG00000020462" source="2186" target="1047" cy:directed="1"/>
      <edge id="19110" label="ENSMUSG00000027490 (TF-TG) ENSMUSG00000020471" source="2186" target="2093" cy:directed="1"/>
      <edge id="19109" label="ENSMUSG00000027490 (TF-TG) ENSMUSG00000020472" source="2186" target="1557" cy:directed="1"/>
      <edge id="19108" label="ENSMUSG00000027490 (TF-TG) ENSMUSG00000020493" source="2186" target="2092" cy:directed="1"/>
      <edge id="19107" label="ENSMUSG00000027490 (TF-TG) ENSMUSG00000020571" source="2186" target="1045" cy:directed="1"/>
      <edge id="19106" label="ENSMUSG00000027490 (TF-TG) ENSMUSG00000020573" source="2186" target="2091" cy:directed="1"/>
      <edge id="19105" label="ENSMUSG00000027490 (TF-TG) ENSMUSG00000020635" source="2186" target="1043" cy:directed="1"/>
      <edge id="19104" label="ENSMUSG00000027490 (TF-TG) ENSMUSG00000020649" source="2186" target="2089" cy:directed="1"/>
      <edge id="19103" label="ENSMUSG00000027490 (TF-TG) ENSMUSG00000020712" source="2186" target="2087" cy:directed="1"/>
      <edge id="19102" label="ENSMUSG00000027490 (TF-TG) ENSMUSG00000020741" source="2186" target="2086" cy:directed="1"/>
      <edge id="19101" label="ENSMUSG00000027490 (TF-TG) ENSMUSG00000020846" source="2186" target="2083" cy:directed="1"/>
      <edge id="19100" label="ENSMUSG00000027490 (TF-TG) ENSMUSG00000020897" source="2186" target="2081" cy:directed="1"/>
      <edge id="19099" label="ENSMUSG00000027490 (TF-TG) ENSMUSG00000020900" source="2186" target="1037" cy:directed="1"/>
      <edge id="19098" label="ENSMUSG00000027490 (TF-TG) ENSMUSG00000020914" source="2186" target="2079" cy:directed="1"/>
      <edge id="19097" label="ENSMUSG00000027490 (TF-TG) ENSMUSG00000021115" source="2186" target="2078" cy:directed="1"/>
      <edge id="19096" label="ENSMUSG00000027490 (TF-TG) ENSMUSG00000021136" source="2186" target="1034" cy:directed="1"/>
      <edge id="19095" label="ENSMUSG00000027490 (TF-TG) ENSMUSG00000021281" source="2186" target="1324" cy:directed="1"/>
      <edge id="19094" label="ENSMUSG00000027490 (TF-TG) ENSMUSG00000021364" source="2186" target="1031" cy:directed="1"/>
      <edge id="19093" label="ENSMUSG00000027490 (TF-TG) ENSMUSG00000021453" source="2186" target="2074" cy:directed="1"/>
      <edge id="19092" label="ENSMUSG00000027490 (TF-TG) ENSMUSG00000021559" source="2186" target="1518" cy:directed="1"/>
      <edge id="19091" label="ENSMUSG00000027490 (TF-TG) ENSMUSG00000021700" source="2186" target="1024" cy:directed="1"/>
      <edge id="19090" label="ENSMUSG00000027490 (TF-TG) ENSMUSG00000021811" source="2186" target="2071" cy:directed="1"/>
      <edge id="19089" label="ENSMUSG00000027490 (TF-TG) ENSMUSG00000021835" source="2186" target="1671" cy:directed="1"/>
      <edge id="19088" label="ENSMUSG00000027490 (TF-TG) ENSMUSG00000021846" source="2186" target="1652" cy:directed="1"/>
      <edge id="19087" label="ENSMUSG00000027490 (TF-TG) ENSMUSG00000021876" source="2186" target="2069" cy:directed="1"/>
      <edge id="19086" label="ENSMUSG00000027490 (TF-TG) ENSMUSG00000021904" source="2186" target="1021" cy:directed="1"/>
      <edge id="19085" label="ENSMUSG00000027490 (TF-TG) ENSMUSG00000021999" source="2186" target="1651" cy:directed="1"/>
      <edge id="19084" label="ENSMUSG00000027490 (TF-TG) ENSMUSG00000022003" source="2186" target="2068" cy:directed="1"/>
      <edge id="19083" label="ENSMUSG00000027490 (TF-TG) ENSMUSG00000022021" source="2186" target="1517" cy:directed="1"/>
      <edge id="19082" label="ENSMUSG00000027490 (TF-TG) ENSMUSG00000022033" source="2186" target="1018" cy:directed="1"/>
      <edge id="19081" label="ENSMUSG00000027490 (TF-TG) ENSMUSG00000022034" source="2186" target="1017" cy:directed="1"/>
      <edge id="19080" label="ENSMUSG00000027490 (TF-TG) ENSMUSG00000022136" source="2186" target="2066" cy:directed="1"/>
      <edge id="19079" label="ENSMUSG00000027490 (TF-TG) ENSMUSG00000022148" source="2186" target="2065" cy:directed="1"/>
      <edge id="19078" label="ENSMUSG00000027490 (TF-TG) ENSMUSG00000022177" source="2186" target="2064" cy:directed="1"/>
      <edge id="19077" label="ENSMUSG00000027490 (TF-TG) ENSMUSG00000022211" source="2186" target="1016" cy:directed="1"/>
      <edge id="19076" label="ENSMUSG00000027490 (TF-TG) ENSMUSG00000022253" source="2186" target="2063" cy:directed="1"/>
      <edge id="19075" label="ENSMUSG00000027490 (TF-TG) ENSMUSG00000022332" source="2186" target="1015" cy:directed="1"/>
      <edge id="19074" label="ENSMUSG00000027490 (TF-TG) ENSMUSG00000022360" source="2186" target="2062" cy:directed="1"/>
      <edge id="19073" label="ENSMUSG00000027490 (TF-TG) ENSMUSG00000022385" source="2186" target="2061" cy:directed="1"/>
      <edge id="19072" label="ENSMUSG00000027490 (TF-TG) ENSMUSG00000022422" source="2186" target="1388" cy:directed="1"/>
      <edge id="19071" label="ENSMUSG00000027490 (TF-TG) ENSMUSG00000022436" source="2186" target="2060" cy:directed="1"/>
      <edge id="19070" label="ENSMUSG00000027490 (TF-TG) ENSMUSG00000022456" source="2186" target="1014" cy:directed="1"/>
      <edge id="19069" label="ENSMUSG00000027490 (TF-TG) ENSMUSG00000022505" source="2186" target="1013" cy:directed="1"/>
      <edge id="19068" label="ENSMUSG00000027490 (TF-TG) ENSMUSG00000022519" source="2186" target="2059" cy:directed="1"/>
      <edge id="19067" label="ENSMUSG00000027490 (TF-TG) ENSMUSG00000022528" source="2186" target="2158" cy:directed="1"/>
      <edge id="19066" label="ENSMUSG00000027490 (TF-TG) ENSMUSG00000022673" source="2186" target="2057" cy:directed="1"/>
      <edge id="19065" label="ENSMUSG00000027490 (TF-TG) ENSMUSG00000022748" source="2186" target="2056" cy:directed="1"/>
      <edge id="19064" label="ENSMUSG00000027490 (TF-TG) ENSMUSG00000022769" source="2186" target="1649" cy:directed="1"/>
      <edge id="19063" label="ENSMUSG00000027490 (TF-TG) ENSMUSG00000022864" source="2186" target="2054" cy:directed="1"/>
      <edge id="19062" label="ENSMUSG00000027490 (TF-TG) ENSMUSG00000022881" source="2186" target="1514" cy:directed="1"/>
      <edge id="19061" label="ENSMUSG00000027490 (TF-TG) ENSMUSG00000022945" source="2186" target="2051" cy:directed="1"/>
      <edge id="19060" label="ENSMUSG00000027490 (TF-TG) ENSMUSG00000022962" source="2186" target="1648" cy:directed="1"/>
      <edge id="19059" label="ENSMUSG00000027490 (TF-TG) ENSMUSG00000023004" source="2186" target="2050" cy:directed="1"/>
      <edge id="19058" label="ENSMUSG00000027490 (TF-TG) ENSMUSG00000023008" source="2186" target="2049" cy:directed="1"/>
      <edge id="19057" label="ENSMUSG00000027490 (TF-TG) ENSMUSG00000023009" source="2186" target="2048" cy:directed="1"/>
      <edge id="19056" label="ENSMUSG00000027490 (TF-TG) ENSMUSG00000023015" source="2186" target="2047" cy:directed="1"/>
      <edge id="19055" label="ENSMUSG00000027490 (TF-TG) ENSMUSG00000023032" source="2186" target="2045" cy:directed="1"/>
      <edge id="19054" label="ENSMUSG00000027490 (TF-TG) ENSMUSG00000023078" source="2186" target="465" cy:directed="1"/>
      <edge id="19053" label="ENSMUSG00000027490 (TF-TG) ENSMUSG00000023236" source="2186" target="2043" cy:directed="1"/>
      <edge id="19052" label="ENSMUSG00000027490 (TF-TG) ENSMUSG00000023906" source="2186" target="464" cy:directed="1"/>
      <edge id="19051" label="ENSMUSG00000027490 (TF-TG) ENSMUSG00000023908" source="2186" target="1316" cy:directed="1"/>
      <edge id="19050" label="ENSMUSG00000027490 (TF-TG) ENSMUSG00000023940" source="2186" target="2041" cy:directed="1"/>
      <edge id="19049" label="ENSMUSG00000027490 (TF-TG) ENSMUSG00000023963" source="2186" target="998" cy:directed="1"/>
      <edge id="19048" label="ENSMUSG00000027490 (TF-TG) ENSMUSG00000024013" source="2186" target="1512" cy:directed="1"/>
      <edge id="19047" label="ENSMUSG00000027490 (TF-TG) ENSMUSG00000024029" source="2186" target="995" cy:directed="1"/>
      <edge id="19046" label="ENSMUSG00000027490 (TF-TG) ENSMUSG00000024063" source="2186" target="2040" cy:directed="1"/>
      <edge id="19045" label="ENSMUSG00000027490 (TF-TG) ENSMUSG00000024232" source="2186" target="2038" cy:directed="1"/>
      <edge id="19044" label="ENSMUSG00000027490 (TF-TG) ENSMUSG00000024301" source="2186" target="2036" cy:directed="1"/>
      <edge id="19043" label="ENSMUSG00000027490 (TF-TG) ENSMUSG00000024431" source="2186" target="2182" cy:directed="1"/>
      <edge id="19042" label="ENSMUSG00000027490 (TF-TG) ENSMUSG00000024516" source="2186" target="2035" cy:directed="1"/>
      <edge id="19041" label="ENSMUSG00000027490 (TF-TG) ENSMUSG00000024525" source="2186" target="2034" cy:directed="1"/>
      <edge id="19040" label="ENSMUSG00000027490 (TF-TG) ENSMUSG00000024542" source="2186" target="2033" cy:directed="1"/>
      <edge id="19039" label="ENSMUSG00000027490 (TF-TG) ENSMUSG00000024590" source="2186" target="2178" cy:directed="1"/>
      <edge id="19038" label="ENSMUSG00000027490 (TF-TG) ENSMUSG00000024597" source="2186" target="2031" cy:directed="1"/>
      <edge id="19037" label="ENSMUSG00000027490 (TF-TG) ENSMUSG00000024646" source="2186" target="1313" cy:directed="1"/>
      <edge id="19036" label="ENSMUSG00000027490 (TF-TG) ENSMUSG00000024774" source="2186" target="2029" cy:directed="1"/>
      <edge id="19035" label="ENSMUSG00000027490 (TF-TG) ENSMUSG00000024777" source="2186" target="2028" cy:directed="1"/>
      <edge id="19034" label="ENSMUSG00000027490 (TF-TG) ENSMUSG00000024795" source="2186" target="2027" cy:directed="1"/>
      <edge id="19033" label="ENSMUSG00000027490 (TF-TG) ENSMUSG00000024978" source="2186" target="2024" cy:directed="1"/>
      <edge id="19032" label="ENSMUSG00000027490 (TF-TG) ENSMUSG00000024990" source="2186" target="461" cy:directed="1"/>
      <edge id="19031" label="ENSMUSG00000027490 (TF-TG) ENSMUSG00000025001" source="2186" target="2022" cy:directed="1"/>
      <edge id="19030" label="ENSMUSG00000027490 (TF-TG) ENSMUSG00000025059" source="2186" target="1310" cy:directed="1"/>
      <edge id="19029" label="ENSMUSG00000027490 (TF-TG) ENSMUSG00000025151" source="2186" target="1506" cy:directed="1"/>
      <edge id="19028" label="ENSMUSG00000027490 (TF-TG) ENSMUSG00000025154" source="2186" target="2020" cy:directed="1"/>
      <edge id="19027" label="ENSMUSG00000027490 (TF-TG) ENSMUSG00000025574" source="2186" target="302" cy:directed="1"/>
      <edge id="19026" label="ENSMUSG00000027490 (TF-TG) ENSMUSG00000025584" source="2186" target="2016" cy:directed="1"/>
      <edge id="19025" label="ENSMUSG00000027490 (TF-TG) ENSMUSG00000025602" source="2186" target="958" cy:directed="1"/>
      <edge id="19024" label="ENSMUSG00000027490 (TF-TG) ENSMUSG00000025747" source="2186" target="1503" cy:directed="1"/>
      <edge id="19023" label="ENSMUSG00000027490 (TF-TG) ENSMUSG00000025810" source="2186" target="1307" cy:directed="1"/>
      <edge id="19022" label="ENSMUSG00000027490 (TF-TG) ENSMUSG00000025876" source="2186" target="1175" cy:directed="1"/>
      <edge id="19021" label="ENSMUSG00000027490 (TF-TG) ENSMUSG00000025912" source="2186" target="2014" cy:directed="1"/>
      <edge id="19020" label="ENSMUSG00000027490 (TF-TG) ENSMUSG00000025969" source="2186" target="1566" cy:directed="1"/>
      <edge id="19019" label="ENSMUSG00000027490 (TF-TG) ENSMUSG00000026196" source="2186" target="2013" cy:directed="1"/>
      <edge id="19018" label="ENSMUSG00000027490 (TF-TG) ENSMUSG00000026281" source="2186" target="2012" cy:directed="1"/>
      <edge id="19017" label="ENSMUSG00000027490 (TF-TG) ENSMUSG00000026322" source="2186" target="945" cy:directed="1"/>
      <edge id="19016" label="ENSMUSG00000027490 (TF-TG) ENSMUSG00000026335" source="2186" target="1641" cy:directed="1"/>
      <edge id="19015" label="ENSMUSG00000027490 (TF-TG) ENSMUSG00000026355" source="2186" target="1502" cy:directed="1"/>
      <edge id="19014" label="ENSMUSG00000027490 (TF-TG) ENSMUSG00000026360" source="2186" target="2011" cy:directed="1"/>
      <edge id="19013" label="ENSMUSG00000027490 (TF-TG) ENSMUSG00000026429" source="2186" target="2010" cy:directed="1"/>
      <edge id="19012" label="ENSMUSG00000027490 (TF-TG) ENSMUSG00000026480" source="2186" target="1499" cy:directed="1"/>
      <edge id="19011" label="ENSMUSG00000027490 (TF-TG) ENSMUSG00000026483" source="2186" target="940" cy:directed="1"/>
      <edge id="19010" label="ENSMUSG00000027490 (TF-TG) ENSMUSG00000026504" source="2186" target="2009" cy:directed="1"/>
      <edge id="19009" label="ENSMUSG00000027490 (TF-TG) ENSMUSG00000026509" source="2186" target="2008" cy:directed="1"/>
      <edge id="19008" label="ENSMUSG00000027490 (TF-TG) ENSMUSG00000026520" source="2186" target="939" cy:directed="1"/>
      <edge id="19007" label="ENSMUSG00000027490 (TF-TG) ENSMUSG00000026546" source="2186" target="2007" cy:directed="1"/>
      <edge id="19006" label="ENSMUSG00000027490 (TF-TG) ENSMUSG00000026646" source="2186" target="1303" cy:directed="1"/>
      <edge id="19005" label="ENSMUSG00000027490 (TF-TG) ENSMUSG00000026669" source="2186" target="1498" cy:directed="1"/>
      <edge id="19004" label="ENSMUSG00000027490 (TF-TG) ENSMUSG00000026683" source="2186" target="2005" cy:directed="1"/>
      <edge id="19003" label="ENSMUSG00000027490 (TF-TG) ENSMUSG00000026782" source="2186" target="932" cy:directed="1"/>
      <edge id="19002" label="ENSMUSG00000027490 (TF-TG) ENSMUSG00000026879" source="2186" target="2000" cy:directed="1"/>
      <edge id="19001" label="ENSMUSG00000027490 (TF-TG) ENSMUSG00000026955" source="2186" target="1299" cy:directed="1"/>
      <edge id="19000" label="ENSMUSG00000027490 (TF-TG) ENSMUSG00000027006" source="2186" target="1998" cy:directed="1"/>
      <edge id="18999" label="ENSMUSG00000027490 (TF-TG) ENSMUSG00000027009" source="2186" target="1997" cy:directed="1"/>
      <edge id="18998" label="ENSMUSG00000027490 (TF-TG) ENSMUSG00000027018" source="2186" target="1495" cy:directed="1"/>
      <edge id="18997" label="ENSMUSG00000027490 (TF-TG) ENSMUSG00000027074" source="2186" target="930" cy:directed="1"/>
      <edge id="18996" label="ENSMUSG00000027490 (TF-TG) ENSMUSG00000027075" source="2186" target="1996" cy:directed="1"/>
      <edge id="18995" label="ENSMUSG00000027490 (TF-TG) ENSMUSG00000027203" source="2186" target="929" cy:directed="1"/>
      <edge id="18994" label="ENSMUSG00000027490 (TF-TG) ENSMUSG00000027254" source="2186" target="1637" cy:directed="1"/>
      <edge id="18993" label="ENSMUSG00000027490 (TF-TG) ENSMUSG00000027326" source="2186" target="1992" cy:directed="1"/>
[truncated: 2,154,557 more chars]
