# Supplementary material for: Regulatory network analysis of Paneth cell and goblet cell enriched gut organoids using transcriptomics approaches
Source: Royal Society of Chemistry journal article supplement (doi:10.1039/c9mo00130a), 2019-12-10
Supplement: c9mo00130a2.cys [file c9mo00130a2.cys › CytoscapeSession-2019_09_26-21_57/properties/stringApp.props]

#Written by: Cytoscape's PropertiesWriterImpl
#Thu Sep 26 21:57:28 BST 2019
showStructureImages=true
showEnhancedLabels=false
