# Supplementary material for: Regulatory network analysis of Paneth cell and goblet cell enriched gut organoids using transcriptomics approaches
Source: Royal Society of Chemistry journal article supplement (doi:10.1039/c9mo00130a), 2019-12-10
Supplement: c9mo00130a2.cys [file c9mo00130a2.cys › CytoscapeSession-2019_09_26-21_57/tables/36-Gob_network_lfc1.txt/LOCAL_ATTRS-org.cytoscape.model.CyEdge-36+default+edge.cytable]

CyCSV-Version	1
SUID	interaction	name	selected
java.lang.Long	java.lang.String	java.lang.String	java.lang.Boolean
36 default edge
7182			false
19467			false
7177			false
7176			false
19463			false
19462			false
7173			false
19458			false
19457			false
19455			false
7161			false
7160			false
19446			false
19444			false
7155			false
19442			false
7143			false
7141			false
7140			false
7138			false
19425			false
7136			false
19423			false
7134			false
19421			false
19420			false
7130			false
7127			false
19414			false
7126			false
7124			false
19411			false
19404			false
19399			false
19398			false
19395			false
7107			false
7106			false
7105			false
7103			false
7100			false
19387			false
7098			false
7096			false
19383			false
7088			false
19375			false
19372			false
7083			false
7082			false
19363			false
19359			false
19358			false
19356			false
19352			false
7064			false
7062			false
7060			false
19347			false
19346			false
19345			false
7057			false
7055			false
19340			false
7052			false
7051			false
7049			false
19334			false
19330			false
7041			false
19328			false
19327			false
19325			false
7034			false
19317			false
7028			false
19315			false
19314			false
7025			false
7022			false
19309			false
7021			false
19304			false
7016			false
7015			false
19297			false
7008			false
19291			false
13147			false
19290			false
19287			false
19283			false
6995			false
19282			false
19281			false
6993			false
6988			false
6986			false
6985			false
13128			false
19271			false
19265			false
19263			false
13118			false
6973			false
19259			false
13114			false
6970			false
6968			false
13110			false
6966			false
13108			false
19251			false
19250			false
13103			false
6959			false
19246			false
6957			false
13098			false
6952			false
19239			false
19236			false
6948			false
19235			false
13091			false
6947			false
6946			false
19231			false
19230			false
19225			false
6936			false
19220			false
19219			false
19218			false
6929			false
6926			false
19212			false
19211			false
6923			false
19210			false
6921			false
19200			false
6911			false
6910			false
19193			false
6901			false
6898			false
6896			false
6893			false
6887			false
6886			false
6883			false
6880			false
6870			false
6869			false
6867			false
6864			false
6863			false
6859			false
6857			false
6852			false
6848			false
6846			false
6845			false
6840			false
6838			false
6833			false
6831			false
6829			false
6827			false
6822			false
6814			false
6813			false
6811			false
6810			false
6790			false
6789			false
6785			false
6783			false
6782			false
6779			false
6778			false
6775			false
6767			false
6764			false
6743			false
6741			false
6739			false
6737			false
6736			false
6734			false
6733			false
6732			false
6731			false
6724			false
4674			false
4673			false
4672			false
6720			false
4670			false
4669			false
6716			false
6707			false
4656			false
4653			false
4649			false
6697			false
6696			false
4646			false
4637			false
6680			false
4628			false
4623			false
4620			false
6668			false
4614			false
6661			false
4611			false
6657			false
6654			false
4605			false
4603			false
6651			false
6646			false
4595			false
4594			false
6642			false
4593			false
6638			false
4589			false
6634			false
4585			false
4581			false
4579			false
6627			false
6623			false
4574			false
6621			false
4565			false
4564			false
6610			false
4560			false
4558			false
4556			false
6604			false
4551			false
6598			false
4549			false
6595			false
6594			false
4542			false
6588			false
4538			false
6586			false
6585			false
6583			false
4531			false
6579			false
4527			false
4525			false
4524			false
6572			false
4520			false
6566			false
4517			false
6564			false
4512			false
6558			false
4508			false
4507			false
6555			false
4502			false
4500			false
6548			false
4498			false
6546			false
4497			false
4496			false
4495			false
4493			false
6541			false
4492			false
6537			false
6536			false
6529			false
6526			false
4476			false
4475			false
4473			false
4471			false
6518			false
20850			false
6513			false
20846			false
20845			false
4461			false
6506			false
20839			false
6503			false
6502			false
20837			false
6501			false
6500			false
20835			false
20834			false
20829			false
20828			false
4443			false
6489			false
20824			false
20822			false
4436			false
6483			false
4431			false
20814			false
20812			false
20811			false
6475			false
6474			false
4425			false
6472			false
6471			false
4422			false
20804			false
20803			false
20802			false
20800			false
4416			false
20798			false
10558			false
20797			false
4413			false
6461			false
4411			false
10555			false
4409			false
10553			false
4407			false
20790			false
4406			false
10550			false
20789			false
20787			false
10545			false
10544			false
6446			false
10542			false
6445			false
4396			false
6444			false
4395			false
6442			false
20777			false
4393			false
10537			false
10536			false
4391			false
6439			false
10535			false
4390			false
10534			false
4389			false
10533			false
4388			false
4384			false
6431			false
4381			false
10525			false
6428			false
10524			false
10522			false
4377			false
20759			false
4373			false
20753			false
10513			false
20751			false
6412			false
6411			false
10507			false
10505			false
20744			false
10502			false
20741			false
6405			false
20740			false
4356			false
6404			false
10500			false
10498			false
10497			false
20735			false
4351			false
6399			false
20734			false
20733			false
10492			false
20731			false
6395			false
10491			false
20728			false
4344			false
10487			false
4342			false
4341			false
6389			false
20724			false
10483			false
4337			false
20719			false
10476			false
6377			false
6376			false
10469			false
20708			false
20707			false
20705			false
6368			false
4318			false
20701			false
10461			false
4316			false
4315			false
10459			false
6361			false
10456			false
6359			false
10455			false
4309			false
20691			false
10450			false
20689			false
4305			false
4303			false
6351			false
6350			false
8396			false
4299			false
6347			false
20680			false
4296			false
8392			false
4295			false
8391			false
20678			false
20674			false
10434			false
20673			false
8385			false
6337			false
8383			false
6334			false
8381			false
4284			false
6331			false
4282			false
10426			false
20665			false
8377			false
4280			false
8375			false
10422			false
8373			false
20660			false
14513			false
14512			false
4272			false
8368			false
8367			false
14510			false
10414			false
10413			false
14508			false
10412			false
20651			false
14507			false
10411			false
4266			false
6312			false
4263			false
8359			false
6311			false
8358			false
8357			false
20644			false
4259			false
10403			false
6302			false
10398			false
8349			false
4252			false
8348			false
4251			false
4250			false
8346			false
14489			false
10393			false
20632			false
10392			false
14487			false
10391			false
20630			false
8342			false
6294			false
10390			false
4245			false
20628			false
14484			false
10388			false
14483			false
4243			false
8339			false
6291			false
10387			false
8338			false
6290			false
10385			false
4240			false
4239			false
20620			false
10380			false
14474			false
10378			false
14473			false
4233			false
10376			false
8326			false
4229			false
20612			false
14468			false
8324			false
10372			false
14467			false
4227			false
6275			false
20609			false
4225			false
14464			false
14463			false
8318			false
4221			false
20604			false
20603			false
14459			false
4219			false
8315			false
10363			false
4218			false
10362			false
8313			false
6265			false
10361			false
10360			false
20599			false
8311			false
10357			false
20596			false
10355			false
8304			false
6256			false
14447			false
6255			false
8302			false
8300			false
6252			false
10348			false
10346			false
20584			false
14440			false
20583			false
10343			false
8294			false
6245			false
14436			false
8291			false
20577			false
8289			false
14432			false
6240			false
10336			false
10335			false
8285			false
6237			false
10332			false
14427			false
14426			false
8282			false
8280			false
20567			false
14423			false
10327			false
6230			false
20565			false
10325			false
20564			false
14420			false
6228			false
20563			false
14418			false
20561			false
6225			false
14416			false
8272			false
20559			false
14415			false
6221			false
8268			false
10316			false
14411			false
20553			false
8265			false
10313			false
14408			false
8263			false
20550			false
6214			false
20549			false
6213			false
10309			false
6211			false
10306			false
14400			false
10302			false
14397			false
20540			false
8252			false
14393			false
14392			false
14391			false
6199			false
8245			false
6195			false
14386			false
20529			false
8241			false
10289			false
20528			false
14384			false
20527			false
8239			false
20525			false
8237			false
10285			false
10284			false
14379			false
8235			false
20521			false
8233			false
6185			false
6184			false
20519			false
8230			false
20517			false
6181			false
10277			false
6180			false
6178			false
14368			false
10271			false
14366			false
20508			false
6169			false
14360			false
10264			false
20503			false
6167			false
20502			false
6166			false
14356			false
10258			false
20497			false
14353			false
10257			false
14350			false
14348			false
14347			false
14346			false
8202			false
14345			false
6153			false
14344			false
8199			false
6151			false
8198			false
14341			false
6149			false
6148			false
8195			false
10243			false
20482			false
8193			false
10241			false
20480			false
6143			false
10239			false
14333			false
8189			false
6141			false
20476			false
14332			false
8188			false
8184			false
20471			false
6134			false
10230			false
8181			false
20468			false
8180			false
14322			false
10226			false
20464			false
20463			false
14319			false
6127			false
10223			false
8174			false
6126			false
20461			false
8173			false
8172			false
10220			false
8171			false
8170			false
14313			false
8168			false
6120			false
8167			false
20453			false
8163			false
14306			false
8162			false
6114			false
6113			false
10209			false
10208			false
20447			false
10206			false
14301			false
14298			false
8154			false
10202			false
20441			false
6104			false
10200			false
14295			false
10199			false
20437			false
6101			false
10196			false
8147			false
14290			false
20433			false
10193			false
20432			false
14288			false
8144			false
8143			false
14286			false
8142			false
14285			false
8141			false
10189			false
14284			false
6092			false
10187			false
20426			false
10186			false
20425			false
6089			false
8136			false
6088			false
8135			false
6086			false
14276			false
14275			false
8131			false
10179			false
14274			false
8128			false
20415			false
6079			false
6078			false
6077			false
10172			false
6075			false
10171			false
10170			false
8121			false
6072			false
8119			false
8117			false
6069			false
6067			false
6066			false
20401			false
6064			false
8111			false
14254			false
20397			false
14253			false
10157			false
6059			false
8106			false
20393			false
6057			false
10153			false
8104			false
6056			false
20391			false
10151			false
20390			false
14246			false
10150			false
14244			false
8100			false
10147			false
8098			false
6050			false
10146			false
8096			false
10144			false
6047			false
20379			false
6041			false
8088			false
20374			false
20372			false
6036			false
20371			false
8083			false
6035			false
6033			false
8080			false
6031			false
6030			false
10126			false
6029			false
10125			false
10124			false
20363			false
8075			false
10123			false
20362			false
10122			false
8073			false
10120			false
10119			false
20358			false
8070			false
10118			false
8069			false
10117			false
6019			false
20353			false
6016			false
20351			false
6015			false
10111			false
20350			false
20348			false
6011			false
10107			false
10104			false
6003			false
20336			false
8048			false
6000			false
10096			false
8047			false
8046			false
8045			false
5996			false
10090			false
8041			false
5993			false
10089			false
20328			false
5991			false
8038			false
20324			false
5987			false
20322			false
5986			false
10082			false
8033			false
20319			false
5981			false
8028			false
10076			false
8027			false
20312			false
20311			false
8023			false
5975			false
5974			false
10070			false
8021			false
5972			false
10066			false
20304			false
5966			false
5965			false
10061			false
20300			false
8012			false
5964			false
20298			false
10058			false
20295			false
10053			false
8003			false
5955			false
10051			false
8001			false
10048			false
20287			false
5951			false
20285			false
7996			false
7995			false
20281			false
7993			false
10040			false
10038			false
20277			false
7986			false
10031			false
7980			false
20266			false
7977			false
10025			false
20264			false
20262			false
7974			false
20259			false
20258			false
10018			false
7969			false
10017			false
10016			false
10014			false
20252			false
7963			false
7962			false
20249			false
10009			false
7957			false
20244			false
7956			false
10004			false
20240			false
7952			false
20238			false
20237			false
9996			false
20235			false
20232			false
7942			false
9990			false
7940			false
7939			false
20226			false
7938			false
9986			false
7937			false
20224			false
9984			false
20223			false
9983			false
20221			false
9981			false
7930			false
20213			false
9972			false
9969			false
7919			false
9967			false
20206			false
7918			false
20204			false
20202			false
7914			false
9961			false
20200			false
7911			false
9959			false
7909			false
7908			false
7904			false
7900			false
9947			false
7898			false
7897			false
7896			false
9942			false
7893			false
9941			false
9939			false
7890			false
20176			false
20175			false
7887			false
7886			false
7884			false
20169			false
7880			false
20167			false
20166			false
20163			false
20162			false
7874			false
9922			false
9920			false
20159			false
9919			false
9918			false
7868			false
20150			false
9908			false
7859			false
20146			false
7858			false
7854			false
7853			false
7850			false
9897			false
7843			false
9891			false
9890			false
7841			false
9886			false
7830			false
7827			false
20114			false
7826			false
9874			false
20113			false
7825			false
7824			false
20111			false
7823			false
7822			false
20109			false
7821			false
20108			false
20106			false
9866			false
20105			false
9865			false
20104			false
20103			false
7814			false
9862			false
7809			false
20096			false
9856			false
9854			false
7805			false
20091			false
20089			false
9847			false
7798			false
9846			false
20082			false
7791			false
9839			false
9836			false
7787			false
9834			false
9831			false
20069			false
9823			false
7774			false
9821			false
20058			false
20057			false
7769			false
7767			false
9815			false
7762			false
20048			false
9805			false
20042			false
7754			false
9802			false
20037			false
7749			false
7747			false
7743			false
20029			false
7740			false
7738			false
9783			false
7734			false
20019			false
7730			false
9778			false
9777			false
9774			false
20013			false
7723			false
20010			false
9769			false
20007			false
7718			false
9763			false
20000			false
7712			false
7710			false
19997			false
7709			false
9757			false
19993			false
7705			false
9753			false
9750			false
19989			false
7701			false
9746			false
9745			false
7696			false
19983			false
19980			false
19977			false
7689			false
7687			false
9735			false
7686			false
7685			false
9730			false
7679			false
19966			false
7678			false
7675			false
9723			false
7674			false
19961			false
9716			false
9714			false
19953			false
7663			false
19950			false
7662			false
19948			false
7656			false
7655			false
9702			false
9701			false
19940			false
9700			false
19938			false
19936			false
9696			false
19933			false
7644			false
19929			false
9688			false
9687			false
7638			false
7637			false
9685			false
7633			false
9681			false
19920			false
9680			false
7628			false
9676			false
9674			false
19912			false
19909			false
7621			false
9669			false
7620			false
9667			false
9666			false
19903			false
9663			false
7613			false
9660			false
7611			false
19897			false
9657			false
9656			false
7607			false
9655			false
7605			false
7604			false
7602			false
9650			false
19888			false
9648			false
9647			false
19886			false
9646			false
9645			false
7596			false
19882			false
7592			false
9640			false
7591			false
9639			false
19878			false
9638			false
19877			false
7586			false
9634			false
7585			false
9632			false
19870			false
9628			false
7579			false
19866			false
13719			false
9622			false
13717			false
7573			false
7572			false
13715			false
9619			false
7570			false
9618			false
9617			false
19856			false
13712			false
7567			false
19852			false
19850			false
13705			false
13704			false
9608			false
7558			false
9606			false
13701			false
19844			false
7553			false
9601			false
19840			false
13696			false
9600			false
19839			false
19838			false
7550			false
19837			false
13693			false
9597			false
7547			false
9592			false
7541			false
13684			false
9588			false
9586			false
19824			false
9582			false
13676			false
7532			false
13675			false
9579			false
19818			false
13674			false
9578			false
13673			false
7529			false
13672			false
9574			false
7525			false
13666			false
19808			false
19807			false
13663			false
13661			false
7517			false
19803			false
19802			false
7514			false
13655			false
7511			false
7508			false
13649			false
7504			false
19790			false
13646			false
7498			false
7497			false
7495			false
7494			false
13637			false
7491			false
7488			false
19775			false
19773			false
13628			false
7483			false
7482			false
19769			false
7480			false
19766			false
13621			false
13617			false
13615			false
7469			false
19756			false
13609			false
7464			false
19751			false
13607			false
7462			false
13605			false
7460			false
7457			false
13599			false
7455			false
13598			false
13597			false
13596			false
13594			false
7450			false
7449			false
13592			false
7448			false
13590			false
7446			false
19732			false
13588			false
19731			false
7443			false
7442			false
7441			false
13584			false
7435			false
19720			false
19719			false
7428			false
7427			false
19714			false
7424			false
7423			false
19710			false
7419			false
7416			false
19701			false
7408			false
7407			false
7404			false
7401			false
7399			false
19686			false
7398			false
19685			false
7395			false
19680			false
7390			false
7389			false
7386			false
7385			false
19670			false
7382			false
19668			false
7379			false
19666			false
7378			false
7373			false
7372			false
7370			false
7369			false
19656			false
19654			false
19653			false
7363			false
7362			false
19649			false
7360			false
7359			false
7356			false
7354			false
7353			false
19637			false
19634			false
7346			false
7345			false
7344			false
19631			false
7342			false
7341			false
7339			false
7337			false
19623			false
7332			false
7331			false
7329			false
19613			false
19611			false
7320			false
19601			false
7305			false
19588			false
7300			false
19586			false
19585			false
7296			false
7295			false
19581			false
7293			false
7292			false
7287			false
7286			false
7285			false
7283			false
7281			false
19567			false
7277			false
19555			false
7266			false
7265			false
7263			false
19547			false
7259			false
19546			false
19543			false
7250			false
19535			false
7242			false
19528			false
7240			false
19525			false
7236			false
7230			false
19514			false
7226			false
19512			false
19508			false
19505			false
7217			false
7211			false
19498			false
19497			false
19495			false
7201			false
7199			false
7194			false
19481			false
19475			false
7185			false
15376			false
11280			false
11275			false
15369			false
15367			false
11270			false
11269			false
15364			false
15363			false
15362			false
11266			false
15361			false
15359			false
11263			false
15356			false
15352			false
15351			false
11255			false
15350			false
15348			false
15344			false
11246			false
15341			false
11244			false
11242			false
15337			false
15333			false
11236			false
15331			false
15330			false
15329			false
11231			false
11230			false
11229			false
15321			false
11224			false
15318			false
15317			false
11221			false
15314			false
15313			false
11217			false
11216			false
11215			false
15310			false
11214			false
15309			false
15306			false
11208			false
11207			false
15302			false
11206			false
15301			false
15300			false
15299			false
11203			false
15298			false
15297			false
11200			false
15294			false
15293			false
15292			false
11196			false
15289			false
11190			false
15285			false
11189			false
15283			false
11186			false
15278			false
11181			false
11179			false
15273			false
15271			false
11174			false
15269			false
15268			false
15264			false
11168			false
11164			false
15259			false
15258			false
11162			false
15254			false
15252			false
15250			false
11153			false
15248			false
15247			false
11151			false
15240			false
15239			false
15237			false
11139			false
15233			false
15232			false
15230			false
11134			false
11133			false
15226			false
15225			false
11129			false
11127			false
15222			false
11126			false
11125			false
15220			false
15218			false
15216			false
15214			false
11118			false
11117			false
11116			false
15210			false
15208			false
11112			false
15206			false
15205			false
11108			false
15201			false
13153			false
13152			false
11102			false
11101			false
15195			false
11099			false
15194			false
15192			false
11096			false
15191			false
15190			false
11093			false
15188			false
15186			false
11090			false
11089			false
15184			false
15180			false
15179			false
15178			false
11082			false
11081			false
11080			false
15175			false
11078			false
15169			false
11073			false
15168			false
15167			false
11070			false
15165			false
15163			false
15162			false
15161			false
15160			false
9014			false
11062			false
9012			false
11060			false
15151			false
11055			false
15149			false
15148			false
15147			false
11048			false
15143			false
15141			false
11039			false
15132			false
11036			false
15129			false
11031			false
11029			false
11027			false
11025			false
11023			false
15117			false
11021			false
15116			false
11019			false
11017			false
15111			false
15109			false
15108			false
11010			false
15104			false
11008			false
11007			false
15101			false
15100			false
15098			false
10999			false
15094			false
10992			false
10990			false
15085			false
15082			false
10986			false
15081			false
15080			false
10984			false
10983			false
15076			false
15075			false
10979			false
15074			false
15073			false
15072			false
15069			false
10972			false
10970			false
10969			false
10967			false
10966			false
10965			false
15057			false
15055			false
15054			false
15052			false
15051			false
15048			false
15047			false
10949			false
15044			false
15042			false
10946			false
10945			false
10944			false
15039			false
10942			false
15037			false
15030			false
15028			false
10932			false
10931			false
15026			false
15024			false
15020			false
10921			false
15016			false
10920			false
15015			false
15013			false
15011			false
10915			false
12962			false
10911			false
15003			false
12955			false
12953			false
12951			false
12949			false
10901			false
14995			false
12946			false
12945			false
10896			false
12943			false
10895			false
12942			false
10893			false
12940			false
10891			false
14985			false
14984			false
12936			false
14983			false
12935			false
12934			false
12933			false
14980			false
12932			false
12931			false
14978			false
14977			false
10881			false
14976			false
12927			false
14974			false
12926			false
14973			false
14970			false
12920			false
14967			false
14966			false
12918			false
12917			false
14963			false
12915			false
12914			false
10866			false
12913			false
14960			false
10864			false
12911			false
12910			false
10862			false
14957			false
14956			false
12908			false
14955			false
12907			false
12904			false
14951			false
14949			false
14948			false
14946			false
10849			false
14944			false
12896			false
14943			false
12895			false
12894			false
10846			false
10845			false
14939			false
10843			false
14938			false
14937			false
12889			false
12887			false
14933			false
10836			false
14931			false
14930			false
12882			false
12881			false
12880			false
14927			false
12878			false
10830			false
14925			false
12877			false
14924			false
10828			false
14923			false
14922			false
12874			false
10826			false
14920			false
14919			false
12871			false
14918			false
12870			false
14917			false
14916			false
12868			false
14915			false
14913			false
12865			false
10817			false
14911			false
14909			false
14904			false
10808			false
14903			false
10807			false
14901			false
10803			false
14898			false
14897			false
14896			false
14895			false
10798			false
14891			false
14890			false
14889			false
14884			false
14883			false
14882			false
14881			false
14880			false
14878			false
10782			false
14874			false
10777			false
14871			false
10775			false
14870			false
10773			false
14862			false
14860			false
14859			false
10763			false
14856			false
10760			false
14853			false
10756			false
14851			false
10755			false
10754			false
14849			false
14847			false
10751			false
14846			false
10749			false
14841			false
10745			false
10742			false
10741			false
14835			false
14834			false
14833			false
14832			false
14828			false
14827			false
14826			false
14824			false
14822			false
10725			false
14819			false
14817			false
10721			false
14816			false
14813			false
14812			false
14811			false
10715			false
14810			false
10714			false
10712			false
14807			false
10709			false
14803			false
10707			false
14801			false
14798			false
14797			false
14794			false
10698			false
14793			false
10697			false
14792			false
10696			false
10694			false
14787			false
14786			false
10690			false
10688			false
14781			false
14779			false
10681			false
10679			false
14772			false
14771			false
14770			false
14769			false
10673			false
14767			false
14766			false
14765			false
14761			false
14758			false
14757			false
10661			false
14755			false
14754			false
10658			false
14752			false
10650			false
14738			false
10640			false
14734			false
14731			false
10633			false
14728			false
14727			false
10625			false
10623			false
10622			false
14717			false
14716			false
10619			false
14714			false
14713			false
14711			false
10612			false
10609			false
14703			false
10607			false
14701			false
14700			false
10604			false
14698			false
10602			false
10601			false
14695			false
14694			false
10598			false
10596			false
14690			false
14689			false
14688			false
14687			false
14683			false
10576			false
14537			false
14536			false
14533			false
14532			false
14531			false
14530			false
14528			false
14525			false
14522			false
14521			false
14519			false
14515			false
8228			false
8226			false
5944			false
5939			false
5938			false
5935			false
5928			false
5920			false
5917			false
5912			false
5905			false
5903			false
5900			false
5898			false
5897			false
5893			false
5892			false
5889			false
5887			false
5883			false
5882			false
5881			false
5879			false
5878			false
5871			false
5870			false
5867			false
5864			false
5860			false
5858			false
5856			false
5854			false
5853			false
5852			false
5851			false
5850			false
5848			false
5837			false
5834			false
5833			false
5832			false
5831			false
5828			false
5824			false
5823			false
5813			false
[truncated: 13,091 more rows]
