# Supplementary material for: Regulatory network analysis of Paneth cell and goblet cell enriched gut organoids using transcriptomics approaches
Source: Royal Society of Chemistry journal article supplement (doi:10.1039/c9mo00130a), 2019-12-10
Supplement: c9mo00130a2.cys [file c9mo00130a2.cys › CytoscapeSession-2019_09_26-21_57/tables/36-Gob_network_lfc1.txt/LOCAL_ATTRS-org.cytoscape.model.CyNode-36+default+node.cytable]

CyCSV-Version	1
SUID	name	selected
java.lang.Long	java.lang.String	java.lang.Boolean
36 default node
667		false
1691		false
1178		false
1689		false
1176		false
1687		false
1685		false
1170		false
2192		false
2187		false
2183		false
2179		false
2178		false
1665		false
2177		false
1149		false
1659		false
1658		false
2169		false
1142		false
2164		false
2162		false
2161		false
1136		false
2158		false
1645		false
2157		false
2155		false
1635		false
2146		false
2142		false
2141		false
2135		false
2133		false
2132		false
2131		false
1617		false
2127		false
589		false
1610		false
2120		false
1608		false
2118		false
1606		false
2116		false
2114		false
577		false
2113		false
1599		false
574		false
1596		false
2108		false
2107		false
1083		false
2106		false
2104		false
2103		false
2100		false
2099		false
1075		false
2098		false
2097		false
2096		false
2095		false
1580		false
2090		false
1577		false
2088		false
2087		false
2086		false
2081		false
2077		false
1562		false
2073		false
1557		false
1556		false
2066		false
2064		false
2062		false
2061		false
2060		false
2059		false
2056		false
1543		false
2054		false
2053		false
1028		false
2050		false
2049		false
2048		false
2045		false
2041		false
2040		false
1015		false
1526		false
2036		false
1523		false
2034		false
2033		false
1520		false
2032		false
2031		false
2030		false
2027		false
2021		false
2020		false
2016		false
2015		false
2012		false
2011		false
1499		false
2010		false
1497		false
1496		false
2008		false
2006		false
2004		false
1491		false
2002		false
2001		false
2000		false
1999		false
1997		false
1482		false
1992		false
1991		false
1988		false
1985		false
1472		false
1981		false
1980		false
1464		false
1976		false
1974		false
949		false
1971		false
1970		false
946		false
1964		false
1963		false
1962		false
938		false
1960		false
1448		false
1959		false
1958		false
1953		false
1952		false
1949		false
1947		false
1944		false
1432		false
1430		false
1941		false
1932		false
1931		false
1926		false
1413		false
1410		false
1921		false
1409		false
1916		false
891		false
1913		false
1912		false
1909		false
883		false
1906		false
1904		false
1903		false
1899		false
1383		false
1894		false
1893		false
1378		false
1890		false
866		false
1889		false
863		false
1375		false
1886		false
859		false
1883		false
1877		false
1363		false
1362		false
1872		false
1871		false
1869		false
1868		false
1866		false
1354		false
841		false
1861		false
1859		false
1344		false
829		false
828		false
1850		false
1847		false
1335		false
1845		false
1844		false
1841		false
1838		false
1837		false
1324		false
1835		false
1834		false
810		false
803		false
802		false
1314		false
1825		false
1824		false
799		false
1822		false
1310		false
1821		false
1820		false
1816		false
1304		false
1300		false
1299		false
1809		false
1296		false
1292		false
1288		false
1796		false
260		false
771		false
1282		false
1791		false
1790		false
763		false
1275		false
1272		false
1783		false
1268		false
1778		false
1777		false
1776		false
1772		false
1768		false
1254		false
1252		false
1758		false
1244		false
1756		false
1755		false
1242		false
1752		false
1239		false
1237		false
1748		false
1747		false
1746		false
1234		false
1745		false
1744		false
1231		false
1742		false
1230		false
1740		false
1218		false
1729		false
1727		false
1725		false
1212		false
1721		false
1209		false
1719		false
1206		false
1205		false
1717		false
1712		false
1199		false
1197		false
685		false
1703		false
1188		false
1187		false
1186		false
1698		false
1697		false
1696		false
1695		false
1693		false
1692		false
1177		false
664		false
1175		false
1174		false
1686		false
1172		false
1681		false
1680		false
655		false
1677		false
653		false
2188		false
1675		false
650		false
1160		false
1158		false
1154		false
1153		false
1661		false
1660		false
2170		false
1146		false
1143		false
1652		false
1140		false
627		false
1138		false
1649		false
1135		false
1134		false
622		false
621		false
1644		false
2154		false
1126		false
2150		false
2149		false
1636		false
612		false
2145		false
2144		false
2143		false
1630		false
1118		false
1629		false
1628		false
604		false
1627		false
2137		false
2136		false
599		false
1622		false
2134		false
1110		false
598		false
1109		false
1618		false
591		false
1102		false
1613		false
2124		false
2122		false
1609		false
2119		false
580		false
1603		false
2112		false
2110		false
1594		false
570		false
1081		false
2105		false
2102		false
1590		false
563		false
1074		false
1584		false
1072		false
1582		false
2093		false
1069		false
1068		false
554		false
1578		false
2089		false
1576		false
1063		false
2085		false
1061		false
1573		false
2083		false
1056		false
2080		false
1567		false
1566		false
1565		false
2075		false
1047		false
2070		false
534		false
1045		false
2069		false
2068		false
2065		false
1553		false
2063		false
1037		false
525		false
524		false
1034		false
519		false
2055		false
2052		false
1540		false
1539		false
1027		false
2051		false
515		false
1538		false
1535		false
1534		false
1022		false
1533		false
1020		false
1532		false
2042		false
506		false
1529		false
1528		false
1016		false
2039		false
502		false
2037		false
2035		false
1521		false
1008		false
1517		false
2028		false
1003		false
1515		false
1514		false
489		false
1001		false
2025		false
2023		false
999		false
2022		false
1510		false
2019		false
481		false
1504		false
1502		false
1501		false
1498		false
2009		false
2007		false
982		false
2005		false
1493		false
1492		false
1489		false
977		false
1487		false
1998		false
1486		false
1484		false
972		false
1996		false
1995		false
1479		false
1987		false
1986		false
1474		false
1982		false
957		false
1978		false
1977		false
1465		false
1463		false
1972		false
947		false
1458		false
1969		false
1455		false
1966		false
940		false
1450		false
1961		false
1449		false
1957		false
1956		false
1955		false
1438		false
1436		false
924		false
1946		false
1434		false
1945		false
920		false
1943		false
1942		false
915		false
1421		false
1419		false
907		false
1929		false
1416		false
1928		false
904		false
900		false
898		false
1408		false
1407		false
1918		false
1406		false
1404		false
1915		false
1403		false
1401		false
1399		false
1908		false
1395		false
1393		false
1390		false
1387		false
1385		false
1384		false
1895		false
868		false
1379		false
867		false
865		false
1888		false
1374		false
861		false
1369		false
1880		false
1368		false
1876		false
1873		false
1361		false
1359		false
1358		false
1356		false
842		false
1865		false
1352		false
1864		false
1350		false
1862		false
838		false
1860		false
1347		false
1858		false
834		false
1857		false
1345		false
833		false
830		false
1853		false
1340		false
1337		false
1848		false
1336		false
1846		false
1333		false
819		false
1842		false
1840		false
813		false
1323		false
1830		false
1829		false
1828		false
804		false
1315		false
801		false
796		false
1303		false
1301		false
1813		false
1812		false
787		false
1807		false
1295		false
1805		false
1291		false
1287		false
773		false
1795		false
1281		false
256		false
255		false
1789		false
253		false
764		false
1269		false
245		false
244		false
243		false
1267		false
1266		false
1265		false
1264		false
750		false
1771		false
746		false
1257		false
1765		false
229		false
737		false
1760		false
1248		false
1247		false
1757		false
221		false
1754		false
728		false
1751		false
1749		false
1232		false
719		false
1229		false
716		false
1739		false
714		false
1736		false
1735		false
1734		false
1733		false
709		false
1220		false
1731		false
705		false
1723		false
1722		false
1720		false
1718		false
691		false
1714		false
1202		false
690		false
1713		false
688		false
1710		false
1709		false
1195		false
1707		false
1704		false
679		false
1702		false
678		false
1189		false
1701		false
1700		false
671		false
1182		false
2140		false
1979		false
1819		false
1307		false
2074		false
2038		false
2166		false
1360		false
1743		false
1806		false
2190		false
1804		false
2186		false
2121		false
2185		false
2182		false
1925		false
1699		false
1761		false
1759		false
2174		false
2014		false
1788		false
1371		false
1881		false
1305		false
1201		false
1297		false
1327		false
2094		false
747		false
2091		false
1129		false
1321		false
583		false
1217		false
702		false
1930		false
1786		false
2153		false
2148		false
2082		false
304		false
1775		false
1372		false
1131		false
1593		false
1792		false
203		false
210		false
1641		false
735		false
1678		false
1679		false
1683		false
1684		false
673		false
1705		false
1711		false
689		false
695		false
699		false
700		false
708		false
712		false
1738		false
1741		false
722		false
726		false
1753		false
1763		false
742		false
743		false
1769		false
748		false
1773		false
1780		false
759		false
1784		false
1785		false
1793		false
772		false
1808		false
788		false
1815		false
1817		false
800		false
1827		false
808		false
1833		false
1836		false
815		false
816		false
1843		false
820		false
822		false
1849		false
1851		false
1855		false
836		false
1867		false
1870		false
847		false
850		false
1874		false
853		false
1892		false
871		false
1898		false
1900		false
880		false
1905		false
1907		false
887		false
890		false
1920		false
1938		false
927		false
928		false
930		false
932		false
943		false
1975		false
1983		false
1990		false
967		false
973		false
980		false
981		false
984		false
987		false
2013		false
2017		false
994		false
998		false
2026		false
2029		false
1007		false
1011		false
1012		false
1014		false
2044		false
1031		false
2057		false
2058		false
1042		false
2079		false
1058		false
1079		false
1084		false
2109		false
1095		false
1098		false
2125		false
1104		false
2130		false
2138		false
2139		false
1119		false
1121		false
1122		false
2152		false
2167		false
2171		false
1161		false
2194		false
1171		false
1190		false
1191		false
1192		false
1208		false
1211		false
1219		false
1221		false
1226		false
1228		false
1236		false
226		false
1255		false
1256		false
1258		false
239		false
1276		false
258		false
1283		false
1284		false
1311		false
1320		false
1322		false
1328		false
1330		false
1334		false
1341		false
1346		false
1351		false
1355		false
1367		false
1370		false
1386		false
1389		false
1391		false
1392		false
1405		false
1411		false
1415		false
1420		false
1423		false
1426		false
1431		false
1433		false
1437		false
1439		false
1443		false
1461		false
1473		false
1490		false
479		false
1522		false
499		false
501		false
1527		false
505		false
517		false
1542		false
1546		false
1549		false
526		false
1552		false
1561		false
1563		false
1572		false
549		false
1585		false
1592		false
1595		false
576		false
1604		false
1611		false
1615		false
1625		false
1626		false
1634		false
613		false
1637		false
1640		false
1646		false
624		false
626		false
628		false
1655		false
1656		false
634		false
1663		false
641		false
646		false
648		false
656		false
657		false
1688		false
1694		false
675		false
1706		false
682		false
683		false
1716		false
692		false
696		false
697		false
1726		false
1728		false
704		false
706		false
1730		false
1732		false
711		false
725		false
1750		false
732		false
733		false
1764		false
1766		false
745		false
749		false
1774		false
754		false
1779		false
762		false
766		false
768		false
769		false
1794		false
1798		false
776		false
1801		false
1803		false
780		false
782		false
1811		false
789		false
790		false
793		false
1818		false
797		false
1826		false
805		false
1831		false
807		false
1832		false
812		false
814		false
1839		false
824		false
1856		false
832		false
839		false
1863		false
1875		false
852		false
1882		false
1887		false
864		false
869		false
1896		false
879		false
881		false
893		false
1919		false
895		false
896		false
1922		false
1923		false
899		false
1924		false
905		false
906		false
909		false
1935		false
911		false
914		false
1940		false
921		false
923		false
1948		false
925		false
1950		false
929		false
1954		false
935		false
936		false
939		false
1968		false
945		false
1973		false
952		false
953		false
955		false
960		false
1989		false
979		false
985		false
986		false
988		false
993		false
2018		false
995		false
996		false
2024		false
1000		false
1005		false
1009		false
1013		false
1018		false
1019		false
1021		false
2046		false
2047		false
1025		false
1030		false
1035		false
1039		false
1041		false
2071		false
2072		false
1051		false
2076		false
1053		false
2078		false
1054		false
2084		false
1066		false
1071		false
1076		false
1078		false
1080		false
2111		false
1087		false
1089		false
2115		false
1096		false
2123		false
2126		false
1103		false
2128		false
2129		false
1106		false
1120		false
2147		false
1123		false
1128		false
1132		false
2172		false
1148		false
1155		false
2180		false
1157		false
1164		false
1165		false
2189		false
1166		false
2193		false
1179		false
1184		false
1194		false
1196		false
1204		false
1213		false
1223		false
1235		false
1238		false
1240		false
1246		false
223		false
1253		false
230		false
236		false
250		false
252		false
1279		false
259		false
1286		false
1290		false
1308		false
1309		false
1312		false
1313		false
1318		false
1325		false
1332		false
1342		false
1343		false
1348		false
1366		false
1373		false
1377		false
1400		false
1402		false
388		false
389		false
1418		false
1425		false
1429		false
410		false
1435		false
1440		false
1442		false
1444		false
1446		false
1447		false
1451		false
427		false
1454		false
1456		false
1457		false
1460		false
1466		false
444		false
1469		false
1475		false
1477		false
454		false
1478		false
1481		false
1485		false
1488		false
466		false
467		false
1494		false
1495		false
1500		false
477		false
1507		false
485		false
1509		false
1511		false
1512		false
1513		false
491		false
1518		false
497		false
498		false
1524		false
1530		false
510		false
1536		false
1537		false
521		false
1555		false
535		false
536		false
1564		false
541		false
543		false
544		false
1568		false
548		false
1574		false
1575		false
1579		false
557		false
559		false
564		false
566		false
571		false
572		false
1597		false
1605		false
582		false
1614		false
592		false
595		false
596		false
1621		false
597		false
1623		false
1624		false
607		false
1632		false
611		false
615		false
1639		false
616		false
617		false
620		false
1647		false
1648		false
625		false
1651		false
1653		false
1654		false
1662		false
1664		false
1666		false
642		false
1667		false
1669		false
1671		false
651		false
1934		false
1810		false
1261		false
1329		false
1601		false
1620		false
1077		false
1879		false
843		false
1249		false
484		false
1060		false
933		false
752		false
1394		false
1598		false
1550		false
405		false
666		false
694		false
701		false
720		false
741		false
755		false
757		false
761		false
778		false
784		false
795		false
798		false
845		false
855		false
877		false
885		false
886		false
908		false
944		false
966		false
970		false
1017		false
1067		false
1107		false
1137		false
1147		false
1152		false
1203		false
1207		false
1224		false
1225		false
1243		false
1250		false
1285		false
1289		false
1293		false
1294		false
1316		false
1331		false
1376		false
1388		false
1452		false
1462		false
1480		false
1541		false
1587		false
1591		false
1602		false
1612		false
1616		false
1668		false
1672		false
1682		false
1737		false
1770		false
1787		false
1797		false
1823		false
1878		false
1901		false
1911		false
1967		false
232		false
443		false
461		false
470		false
486		false
488		false
537		false
565		false
569		false
585		false
587		false
618		false
619		false
631		false
662		false
663		false
677		false
703		false
707		false
710		false
724		false
727		false
729		false
731		false
736		false
738		false
740		false
756		false
758		false
779		false
786		false
791		false
794		false
826		false
844		false
846		false
848		false
858		false
884		false
888		false
894		false
913		false
919		false
937		false
942		false
951		false
961		false
965		false
968		false
989		false
1010		false
1023		false
1024		false
1026		false
1029		false
1043		false
1048		false
1049		false
1064		false
1065		false
1085		false
1088		false
1100		false
1105		false
1116		false
1145		false
1150		false
1151		false
1180		false
1181		false
1193		false
1198		false
1215		false
1216		false
1222		false
1227		false
1260		false
1262		false
1277		false
1280		false
1298		false
1302		false
1326		false
1382		false
1398		false
1417		false
1422		false
1427		false
1441		false
1459		false
1468		false
1471		false
1506		false
1519		false
1531		false
1544		false
1548		false
1569		false
1581		false
1583		false
1589		false
1607		false
1631		false
1657		false
1673		false
1708		false
1724		false
1767		false
1800		false
1884		false
1891		false
1897		false
1910		false
1917		false
2151		false
2165		false
2184		false
228		false
235		false
247		false
248		false
316		false
336		false
354		false
377		false
394		false
396		false
401		false
402		false
408		false
409		false
413		false
416		false
419		false
429		false
452		false
464		false
468		false
475		false
490		false
492		false
507		false
508		false
509		false
512		false
514		false
516		false
518		false
522		false
528		false
530		false
539		false
551		false
552		false
555		false
558		false
560		false
579		false
588		false
608		false
636		false
638		false
645		false
652		false
658		false
670		false
674		false
681		false
687		false
721		false
739		false
751		false
760		false
770		false
774		false
775		false
777		false
785		false
792		false
825		false
831		false
837		false
862		false
873		false
889		false
897		false
901		false
910		false
912		false
918		false
931		false
948		false
950		false
954		false
964		false
969		false
971		false
976		false
990		false
1036		false
1055		false
1057		false
1073		false
1082		false
1093		false
1108		false
1111		false
1114		false
1124		false
1156		false
1163		false
1167		false
1169		false
1185		false
1259		false
1273		false
1319		false
1339		false
1349		false
1380		false
1414		false
1453		false
1467		false
1483		false
1508		false
1551		false
1586		false
1588		false
1690		false
1914		false
1933		false
1984		false
2101		false
225		false
233		false
237		false
242		false
331		false
343		false
384		false
387		false
390		false
392		false
395		false
400		false
415		false
422		false
423		false
424		false
432		false
433		false
438		false
445		false
447		false
451		false
453		false
459		false
460		false
462		false
463		false
469		false
473		false
478		false
483		false
493		false
500		false
532		false
533		false
540		false
542		false
547		false
550		false
553		false
556		false
567		false
584		false
594		false
603		false
605		false
609		false
610		false
614		false
630		false
637		false
647		false
649		false
660		false
661		false
668		false
684		false
698		false
730		false
875		false
878		false
963		false
975		false
997		false
1052		false
1086		false
1092		false
1141		false
1214		false
1245		false
1278		false
1306		false
1338		false
1365		false
1381		false
1396		false
1476		false
1503		false
1545		false
1547		false
1600		false
1619		false
1642		false
1782		false
1939		false
1993		false
2043		false
254		false
274		false
328		false
404		false
411		false
431		false
503		false
520		false
531		false
546		false
568		false
575		false
581		false
623		false
635		false
669		false
