# Supplementary material for: Regulatory network analysis of Paneth cell and goblet cell enriched gut organoids using transcriptomics approaches
Source: Royal Society of Chemistry journal article supplement (doi:10.1039/c9mo00130a), 2019-12-10
Supplement: c9mo00130a2.cys [file c9mo00130a2.cys › CytoscapeSession-2019_09_26-21_57/tables/36-Gob_network_lfc1.txt/SHARED_ATTRS-org.cytoscape.model.CyEdge-36+shared+edge.cytable]

CyCSV-Version	1
SUID	isInPath	Module_Edge_Color	shared interaction	shared name
java.lang.Long	java.lang.Boolean	java.lang.Integer	java.lang.String	java.lang.String
		mutable
36 shared edge
7182	false	-1	TF-TG	ENSMUSG00000032035 (TF-TG) ENSMUSG00000020846
19467	false	-1	TF-TG	ENSMUSG00000022346 (TF-TG) ENSMUSG00000056050
7177	false	-1	TF-TG	ENSMUSG00000032035 (TF-TG) ENSMUSG00000020900
7176	false	-1	TF-TG	ENSMUSG00000032035 (TF-TG) ENSMUSG00000020901
19463	false	-1	TF-TG	ENSMUSG00000022346 (TF-TG) ENSMUSG00000056531
19462	false	-1	TF-TG	ENSMUSG00000022346 (TF-TG) ENSMUSG00000056602
7173	false	-1	TF-TG	ENSMUSG00000032035 (TF-TG) ENSMUSG00000021061
19458	false	-1	TF-TG	ENSMUSG00000022346 (TF-TG) ENSMUSG00000056888
19457	false	-1	TF-TG	ENSMUSG00000022346 (TF-TG) ENSMUSG00000057069
19455	false	-1	TF-TG	ENSMUSG00000022346 (TF-TG) ENSMUSG00000057137
7161	false	-1	TF-TG	ENSMUSG00000032035 (TF-TG) ENSMUSG00000021391
7160	false	-1	TF-TG	ENSMUSG00000032035 (TF-TG) ENSMUSG00000021396
19446	false	-1	TF-TG	ENSMUSG00000022346 (TF-TG) ENSMUSG00000057897
19444	false	-1	TF-TG	ENSMUSG00000022346 (TF-TG) ENSMUSG00000058006
7155	false	-1	TF-TG	ENSMUSG00000032035 (TF-TG) ENSMUSG00000021572
19442	false	-1	TF-TG	ENSMUSG00000022346 (TF-TG) ENSMUSG00000058070
7143	false	-1	TF-TG	ENSMUSG00000032035 (TF-TG) ENSMUSG00000021831
7141	false	-1	TF-TG	ENSMUSG00000032035 (TF-TG) ENSMUSG00000021846
7140	false	-1	TF-TG	ENSMUSG00000032035 (TF-TG) ENSMUSG00000021876
7138	false	-1	TF-TG	ENSMUSG00000032035 (TF-TG) ENSMUSG00000021986
19425	false	-1	TF-TG	ENSMUSG00000022346 (TF-TG) ENSMUSG00000059493
7136	false	-1	TF-TG	ENSMUSG00000032035 (TF-TG) ENSMUSG00000022003
19423	false	-1	TF-TG	ENSMUSG00000022346 (TF-TG) ENSMUSG00000059713
7134	false	-1	TF-TG	ENSMUSG00000032035 (TF-TG) ENSMUSG00000022021
19421	false	-1	TF-TG	ENSMUSG00000022346 (TF-TG) ENSMUSG00000059939
19420	false	-1	TF-TG	ENSMUSG00000022346 (TF-TG) ENSMUSG00000059991
7130	false	-1	TF-TG	ENSMUSG00000032035 (TF-TG) ENSMUSG00000022148
7127	false	-1	TF-TG	ENSMUSG00000032035 (TF-TG) ENSMUSG00000022211
19414	false	-1	TF-TG	ENSMUSG00000022346 (TF-TG) ENSMUSG00000060550
7126	false	-1	TF-TG	ENSMUSG00000032035 (TF-TG) ENSMUSG00000022253
7124	false	-1	TF-TG	ENSMUSG00000032035 (TF-TG) ENSMUSG00000022346
19411	false	-1	TF-TG	ENSMUSG00000022346 (TF-TG) ENSMUSG00000060671
19404	false	-1	TF-TG	ENSMUSG00000022346 (TF-TG) ENSMUSG00000061607
19399	false	-1	TF-TG	ENSMUSG00000022346 (TF-TG) ENSMUSG00000062210
19398	false	-1	TF-TG	ENSMUSG00000022346 (TF-TG) ENSMUSG00000062248
19395	false	-1	TF-TG	ENSMUSG00000022346 (TF-TG) ENSMUSG00000062760
7107	false	-1	TF-TG	ENSMUSG00000032035 (TF-TG) ENSMUSG00000022762
7106	false	-1	TF-TG	ENSMUSG00000032035 (TF-TG) ENSMUSG00000022769
7105	false	-1	TF-TG	ENSMUSG00000032035 (TF-TG) ENSMUSG00000022773
7103	false	-1	TF-TG	ENSMUSG00000032035 (TF-TG) ENSMUSG00000022840
7100	false	-1	TF-TG	ENSMUSG00000032035 (TF-TG) ENSMUSG00000022881
19387	false	-1	TF-TG	ENSMUSG00000022346 (TF-TG) ENSMUSG00000063810
7098	false	-1	TF-TG	ENSMUSG00000032035 (TF-TG) ENSMUSG00000022912
7096	false	-1	TF-TG	ENSMUSG00000032035 (TF-TG) ENSMUSG00000022945
19383	false	-1	TF-TG	ENSMUSG00000022346 (TF-TG) ENSMUSG00000064090
7088	false	-1	TF-TG	ENSMUSG00000032035 (TF-TG) ENSMUSG00000023066
19375	false	-1	TF-TG	ENSMUSG00000022346 (TF-TG) ENSMUSG00000064267
19372	false	-1	TF-TG	ENSMUSG00000022346 (TF-TG) ENSMUSG00000065952
7083	false	-1	TF-TG	ENSMUSG00000032035 (TF-TG) ENSMUSG00000023247
7082	false	-1	TF-TG	ENSMUSG00000032035 (TF-TG) ENSMUSG00000023272
19363	false	-1	TF-TG	ENSMUSG00000022346 (TF-TG) ENSMUSG00000067813
19359	false	-1	TF-TG	ENSMUSG00000022346 (TF-TG) ENSMUSG00000068154
19358	false	-1	TF-TG	ENSMUSG00000022346 (TF-TG) ENSMUSG00000068196
19356	false	-1	TF-TG	ENSMUSG00000022346 (TF-TG) ENSMUSG00000068735
19352	false	-1	TF-TG	ENSMUSG00000022346 (TF-TG) ENSMUSG00000069227
7064	false	-1	TF-TG	ENSMUSG00000032035 (TF-TG) ENSMUSG00000024175
7062	false	-1	TF-TG	ENSMUSG00000032035 (TF-TG) ENSMUSG00000024193
7060	false	-1	TF-TG	ENSMUSG00000032035 (TF-TG) ENSMUSG00000024299
19347	false	-1	TF-TG	ENSMUSG00000022346 (TF-TG) ENSMUSG00000069805
19346	false	-1	TF-TG	ENSMUSG00000022346 (TF-TG) ENSMUSG00000069814
19345	false	-1	TF-TG	ENSMUSG00000022346 (TF-TG) ENSMUSG00000069910
7057	false	-1	TF-TG	ENSMUSG00000032035 (TF-TG) ENSMUSG00000024366
7055	false	-1	TF-TG	ENSMUSG00000032035 (TF-TG) ENSMUSG00000024423
19340	false	-1	TF-TG	ENSMUSG00000022346 (TF-TG) ENSMUSG00000070287
7052	false	-1	TF-TG	ENSMUSG00000032035 (TF-TG) ENSMUSG00000024512
7051	false	-1	TF-TG	ENSMUSG00000032035 (TF-TG) ENSMUSG00000024516
7049	false	-1	TF-TG	ENSMUSG00000032035 (TF-TG) ENSMUSG00000024533
19334	false	-1	TF-TG	ENSMUSG00000022346 (TF-TG) ENSMUSG00000070498
19330	false	-1	TF-TG	ENSMUSG00000022346 (TF-TG) ENSMUSG00000070687
7041	false	-1	TF-TG	ENSMUSG00000032035 (TF-TG) ENSMUSG00000024613
19328	false	-1	TF-TG	ENSMUSG00000022346 (TF-TG) ENSMUSG00000070802
19327	false	-1	TF-TG	ENSMUSG00000022346 (TF-TG) ENSMUSG00000070867
19325	false	-1	TF-TG	ENSMUSG00000022346 (TF-TG) ENSMUSG00000071226
7034	false	-1	TF-TG	ENSMUSG00000032035 (TF-TG) ENSMUSG00000024777
19317	false	-1	TF-TG	ENSMUSG00000022346 (TF-TG) ENSMUSG00000071984
7028	false	-1	TF-TG	ENSMUSG00000032035 (TF-TG) ENSMUSG00000024891
19315	false	-1	TF-TG	ENSMUSG00000022346 (TF-TG) ENSMUSG00000072115
19314	false	-1	TF-TG	ENSMUSG00000022346 (TF-TG) ENSMUSG00000072235
7025	false	-1	TF-TG	ENSMUSG00000032035 (TF-TG) ENSMUSG00000024912
7022	false	-1	TF-TG	ENSMUSG00000032035 (TF-TG) ENSMUSG00000024989
19309	false	-1	TF-TG	ENSMUSG00000022346 (TF-TG) ENSMUSG00000072849
7021	false	-1	TF-TG	ENSMUSG00000032035 (TF-TG) ENSMUSG00000025001
19304	false	-1	TF-TG	ENSMUSG00000022346 (TF-TG) ENSMUSG00000073409
7016	false	-1	TF-TG	ENSMUSG00000032035 (TF-TG) ENSMUSG00000025064
7015	false	-1	TF-TG	ENSMUSG00000032035 (TF-TG) ENSMUSG00000025075
19297	false	-1	TF-TG	ENSMUSG00000022346 (TF-TG) ENSMUSG00000074183
7008	false	-1	TF-TG	ENSMUSG00000032035 (TF-TG) ENSMUSG00000025351
19291	false	-1	TF-TG	ENSMUSG00000022346 (TF-TG) ENSMUSG00000074651
13147	false	-1	TF-TG	ENSMUSG00000030199 (TF-TG) ENSMUSG00000013698
19290	false	-1	TF-TG	ENSMUSG00000022346 (TF-TG) ENSMUSG00000074652
19287	false	-1	TF-TG	ENSMUSG00000022346 (TF-TG) ENSMUSG00000074802
19283	false	-1	TF-TG	ENSMUSG00000022346 (TF-TG) ENSMUSG00000074892
6995	false	-1	TF-TG	ENSMUSG00000032035 (TF-TG) ENSMUSG00000025608
19282	false	-1	TF-TG	ENSMUSG00000022346 (TF-TG) ENSMUSG00000074896
19281	false	-1	TF-TG	ENSMUSG00000022346 (TF-TG) ENSMUSG00000075012
6993	false	-1	TF-TG	ENSMUSG00000032035 (TF-TG) ENSMUSG00000025742
6988	false	-1	TF-TG	ENSMUSG00000032035 (TF-TG) ENSMUSG00000025876
6986	false	-1	TF-TG	ENSMUSG00000032035 (TF-TG) ENSMUSG00000025938
6985	false	-1	TF-TG	ENSMUSG00000032035 (TF-TG) ENSMUSG00000025969
13128	false	-1	TF-TG	ENSMUSG00000030199 (TF-TG) ENSMUSG00000027661
19271	false	-1	TF-TG	ENSMUSG00000022346 (TF-TG) ENSMUSG00000078349
19265	false	-1	TF-TG	ENSMUSG00000022346 (TF-TG) ENSMUSG00000078773
19263	false	-1	TF-TG	ENSMUSG00000022346 (TF-TG) ENSMUSG00000078949
13118	false	-1	TF-TG	ENSMUSG00000030199 (TF-TG) ENSMUSG00000031981
6973	false	-1	TF-TG	ENSMUSG00000032035 (TF-TG) ENSMUSG00000026303
19259	false	-1	TF-TG	ENSMUSG00000022346 (TF-TG) ENSMUSG00000079038
13114	false	-1	TF-TG	ENSMUSG00000030199 (TF-TG) ENSMUSG00000033970
6970	false	-1	TF-TG	ENSMUSG00000032035 (TF-TG) ENSMUSG00000026355
6968	false	-1	TF-TG	ENSMUSG00000032035 (TF-TG) ENSMUSG00000026380
13110	false	-1	TF-TG	ENSMUSG00000030199 (TF-TG) ENSMUSG00000039234
6966	false	-1	TF-TG	ENSMUSG00000032035 (TF-TG) ENSMUSG00000026398
13108	false	-1	TF-TG	ENSMUSG00000030199 (TF-TG) ENSMUSG00000039384
19251	false	-1	TF-TG	ENSMUSG00000022346 (TF-TG) ENSMUSG00000079685
19250	false	-1	TF-TG	ENSMUSG00000022346 (TF-TG) ENSMUSG00000081769
13103	false	-1	TF-TG	ENSMUSG00000030199 (TF-TG) ENSMUSG00000041688
6959	false	-1	TF-TG	ENSMUSG00000032035 (TF-TG) ENSMUSG00000026483
19246	false	-1	TF-TG	ENSMUSG00000022346 (TF-TG) ENSMUSG00000089789
6957	false	-1	TF-TG	ENSMUSG00000032035 (TF-TG) ENSMUSG00000026504
13098	false	-1	TF-TG	ENSMUSG00000030199 (TF-TG) ENSMUSG00000044005
6952	false	-1	TF-TG	ENSMUSG00000032035 (TF-TG) ENSMUSG00000026546
19239	false	-1	TF-TG	ENSMUSG00000022346 (TF-TG) ENSMUSG00000092486
19236	false	-1	TF-TG	ENSMUSG00000022346 (TF-TG) ENSMUSG00000094928
6948	false	-1	TF-TG	ENSMUSG00000032035 (TF-TG) ENSMUSG00000026646
19235	false	-1	TF-TG	ENSMUSG00000022346 (TF-TG) ENSMUSG00000095567
13091	false	-1	TF-TG	ENSMUSG00000030199 (TF-TG) ENSMUSG00000053580
6947	false	-1	TF-TG	ENSMUSG00000032035 (TF-TG) ENSMUSG00000026683
6946	false	-1	TF-TG	ENSMUSG00000032035 (TF-TG) ENSMUSG00000026700
19231	false	-1	TF-TG	ENSMUSG00000022346 (TF-TG) ENSMUSG00000096847
19230	false	-1	TF-TG	ENSMUSG00000022346 (TF-TG) ENSMUSG00000098557
19225	false	-1	TF-TG	ENSMUSG00000022346 (TF-TG) ENSMUSG00000110206
6936	false	-1	TF-TG	ENSMUSG00000032035 (TF-TG) ENSMUSG00000026833
19220	false	-1	TF-lincRNA	ENSMUSG00000022346 (TF-lincRNA) ENSMUSG00000085183
19219	false	-1	TF-lincRNA	ENSMUSG00000022346 (TF-lincRNA) ENSMUSG00000103043
19218	false	-1	TF-lincRNA	ENSMUSG00000022346 (TF-lincRNA) ENSMUSG00000097561
6929	false	-1	TF-TG	ENSMUSG00000032035 (TF-TG) ENSMUSG00000027006
6926	false	-1	TF-TG	ENSMUSG00000032035 (TF-TG) ENSMUSG00000027075
19212	false	-1	TF-lincRNA	ENSMUSG00000022346 (TF-lincRNA) ENSMUSG00000097932
19211	false	-1	TF-lincRNA	ENSMUSG00000022346 (TF-lincRNA) ENSMUSG00000099552
6923	false	-1	TF-TG	ENSMUSG00000032035 (TF-TG) ENSMUSG00000027230
19210	false	-1	TF-lincRNA	ENSMUSG00000022346 (TF-lincRNA) ENSMUSG00000097284
6921	false	-1	TF-TG	ENSMUSG00000032035 (TF-TG) ENSMUSG00000027273
19200	false	-1	TF-lincRNA	ENSMUSG00000022346 (TF-lincRNA) ENSMUSG00000097632
6911	false	-1	TF-TG	ENSMUSG00000032035 (TF-TG) ENSMUSG00000027420
6910	false	-1	TF-TG	ENSMUSG00000032035 (TF-TG) ENSMUSG00000027435
19193	false	-1	TF-miRNA	ENSMUSG00000022346 (TF-miRNA) mmu-miR-1945
6901	false	-1	TF-TG	ENSMUSG00000032035 (TF-TG) ENSMUSG00000027533
6898	false	-1	TF-TG	ENSMUSG00000032035 (TF-TG) ENSMUSG00000027611
6896	false	-1	TF-TG	ENSMUSG00000032035 (TF-TG) ENSMUSG00000027635
6893	false	-1	TF-TG	ENSMUSG00000032035 (TF-TG) ENSMUSG00000027661
6887	false	-1	TF-TG	ENSMUSG00000032035 (TF-TG) ENSMUSG00000027797
6886	false	-1	TF-TG	ENSMUSG00000032035 (TF-TG) ENSMUSG00000027834
6883	false	-1	TF-TG	ENSMUSG00000032035 (TF-TG) ENSMUSG00000027931
6880	false	-1	TF-TG	ENSMUSG00000032035 (TF-TG) ENSMUSG00000028039
6870	false	-1	TF-TG	ENSMUSG00000032035 (TF-TG) ENSMUSG00000028282
6869	false	-1	TF-TG	ENSMUSG00000032035 (TF-TG) ENSMUSG00000028312
6867	false	-1	TF-TG	ENSMUSG00000032035 (TF-TG) ENSMUSG00000028356
6864	false	-1	TF-TG	ENSMUSG00000032035 (TF-TG) ENSMUSG00000028403
6863	false	-1	TF-TG	ENSMUSG00000032035 (TF-TG) ENSMUSG00000028415
6859	false	-1	TF-TG	ENSMUSG00000032035 (TF-TG) ENSMUSG00000028532
6857	false	-1	TF-TG	ENSMUSG00000032035 (TF-TG) ENSMUSG00000028555
6852	false	-1	TF-TG	ENSMUSG00000032035 (TF-TG) ENSMUSG00000028602
6848	false	-1	TF-TG	ENSMUSG00000032035 (TF-TG) ENSMUSG00000028634
6846	false	-1	TF-TG	ENSMUSG00000032035 (TF-TG) ENSMUSG00000028693
6845	false	-1	TF-TG	ENSMUSG00000032035 (TF-TG) ENSMUSG00000028699
6840	false	-1	TF-TG	ENSMUSG00000032035 (TF-TG) ENSMUSG00000028763
6838	false	-1	TF-TG	ENSMUSG00000032035 (TF-TG) ENSMUSG00000028825
6833	false	-1	TF-TG	ENSMUSG00000032035 (TF-TG) ENSMUSG00000028909
6831	false	-1	TF-TG	ENSMUSG00000032035 (TF-TG) ENSMUSG00000028927
6829	false	-1	TF-TG	ENSMUSG00000032035 (TF-TG) ENSMUSG00000028949
6827	false	-1	TF-TG	ENSMUSG00000032035 (TF-TG) ENSMUSG00000028986
6822	false	-1	TF-TG	ENSMUSG00000032035 (TF-TG) ENSMUSG00000029154
6814	false	-1	TF-TG	ENSMUSG00000032035 (TF-TG) ENSMUSG00000029312
6813	false	-1	TF-TG	ENSMUSG00000032035 (TF-TG) ENSMUSG00000029343
6811	false	-1	TF-TG	ENSMUSG00000032035 (TF-TG) ENSMUSG00000029408
6810	false	-1	TF-TG	ENSMUSG00000032035 (TF-TG) ENSMUSG00000029420
6790	false	-1	TF-TG	ENSMUSG00000032035 (TF-TG) ENSMUSG00000029875
6789	false	-1	TF-TG	ENSMUSG00000032035 (TF-TG) ENSMUSG00000029910
6785	false	-1	TF-TG	ENSMUSG00000032035 (TF-TG) ENSMUSG00000030107
6783	false	-1	TF-TG	ENSMUSG00000032035 (TF-TG) ENSMUSG00000030137
6782	false	-1	TF-TG	ENSMUSG00000032035 (TF-TG) ENSMUSG00000030199
6779	false	-1	TF-TG	ENSMUSG00000032035 (TF-TG) ENSMUSG00000030287
6778	false	-1	TF-TG	ENSMUSG00000032035 (TF-TG) ENSMUSG00000030329
6775	false	-1	TF-TG	ENSMUSG00000032035 (TF-TG) ENSMUSG00000030353
6767	false	-1	TF-TG	ENSMUSG00000032035 (TF-TG) ENSMUSG00000030659
6764	false	-1	TF-TG	ENSMUSG00000032035 (TF-TG) ENSMUSG00000030772
6743	false	-1	TF-TG	ENSMUSG00000032035 (TF-TG) ENSMUSG00000031629
6741	false	-1	TF-TG	ENSMUSG00000032035 (TF-TG) ENSMUSG00000031668
6739	false	-1	TF-TG	ENSMUSG00000032035 (TF-TG) ENSMUSG00000031730
6737	false	-1	TF-TG	ENSMUSG00000032035 (TF-TG) ENSMUSG00000031757
6736	false	-1	TF-TG	ENSMUSG00000032035 (TF-TG) ENSMUSG00000031760
6734	false	-1	TF-TG	ENSMUSG00000032035 (TF-TG) ENSMUSG00000031788
6733	false	-1	TF-TG	ENSMUSG00000032035 (TF-TG) ENSMUSG00000031790
6732	false	-1	TF-TG	ENSMUSG00000032035 (TF-TG) ENSMUSG00000031791
6731	false	-1	TF-TG	ENSMUSG00000032035 (TF-TG) ENSMUSG00000031844
6724	false	-1	TF-TG	ENSMUSG00000032035 (TF-TG) ENSMUSG00000031981
4674	false	-1	TF-TG	ENSMUSG00000068154 (TF-TG) ENSMUSG00000001525
4673	false	-1	TF-TG	ENSMUSG00000068154 (TF-TG) ENSMUSG00000002565
4672	false	-1	TF-TG	ENSMUSG00000068154 (TF-TG) ENSMUSG00000002835
6720	false	-1	TF-TG	ENSMUSG00000032035 (TF-TG) ENSMUSG00000032092
4670	false	-1	TF-TG	ENSMUSG00000068154 (TF-TG) ENSMUSG00000003411
4669	false	-1	TF-TG	ENSMUSG00000068154 (TF-TG) ENSMUSG00000003436
6716	false	-1	TF-TG	ENSMUSG00000032035 (TF-TG) ENSMUSG00000032232
6707	false	-1	TF-TG	ENSMUSG00000032035 (TF-TG) ENSMUSG00000032350
4656	false	-1	TF-TG	ENSMUSG00000068154 (TF-TG) ENSMUSG00000007989
4653	false	-1	TF-TG	ENSMUSG00000068154 (TF-TG) ENSMUSG00000009292
4649	false	-1	TF-TG	ENSMUSG00000068154 (TF-TG) ENSMUSG00000010830
6697	false	-1	TF-TG	ENSMUSG00000032035 (TF-TG) ENSMUSG00000032531
6696	false	-1	TF-TG	ENSMUSG00000032035 (TF-TG) ENSMUSG00000032532
4646	false	-1	TF-TG	ENSMUSG00000068154 (TF-TG) ENSMUSG00000013523
4637	false	-1	TF-TG	ENSMUSG00000068154 (TF-TG) ENSMUSG00000017493
6680	false	-1	TF-TG	ENSMUSG00000032035 (TF-TG) ENSMUSG00000032902
4628	false	-1	TF-TG	ENSMUSG00000068154 (TF-TG) ENSMUSG00000018554
4623	false	-1	TF-TG	ENSMUSG00000068154 (TF-TG) ENSMUSG00000019796
4620	false	-1	TF-TG	ENSMUSG00000068154 (TF-TG) ENSMUSG00000019945
6668	false	-1	TF-TG	ENSMUSG00000032035 (TF-TG) ENSMUSG00000033307
4614	false	-1	TF-TG	ENSMUSG00000068154 (TF-TG) ENSMUSG00000020226
6661	false	-1	TF-TG	ENSMUSG00000032035 (TF-TG) ENSMUSG00000033825
4611	false	-1	TF-TG	ENSMUSG00000068154 (TF-TG) ENSMUSG00000020571
6657	false	-1	TF-TG	ENSMUSG00000032035 (TF-TG) ENSMUSG00000033970
6654	false	-1	TF-TG	ENSMUSG00000032035 (TF-TG) ENSMUSG00000034118
4605	false	-1	TF-TG	ENSMUSG00000068154 (TF-TG) ENSMUSG00000020846
4603	false	-1	TF-TG	ENSMUSG00000068154 (TF-TG) ENSMUSG00000020901
6651	false	-1	TF-TG	ENSMUSG00000032035 (TF-TG) ENSMUSG00000034265
6646	false	-1	TF-TG	ENSMUSG00000032035 (TF-TG) ENSMUSG00000034579
4595	false	-1	TF-TG	ENSMUSG00000068154 (TF-TG) ENSMUSG00000021831
4594	false	-1	TF-TG	ENSMUSG00000068154 (TF-TG) ENSMUSG00000021838
6642	false	-1	TF-TG	ENSMUSG00000032035 (TF-TG) ENSMUSG00000034656
4593	false	-1	TF-TG	ENSMUSG00000068154 (TF-TG) ENSMUSG00000021876
6638	false	-1	TF-TG	ENSMUSG00000032035 (TF-TG) ENSMUSG00000034768
4589	false	-1	TF-TG	ENSMUSG00000068154 (TF-TG) ENSMUSG00000022346
6634	false	-1	TF-TG	ENSMUSG00000032035 (TF-TG) ENSMUSG00000034818
4585	false	-1	TF-TG	ENSMUSG00000068154 (TF-TG) ENSMUSG00000022489
4581	false	-1	TF-TG	ENSMUSG00000068154 (TF-TG) ENSMUSG00000022762
4579	false	-1	TF-TG	ENSMUSG00000068154 (TF-TG) ENSMUSG00000022945
6627	false	-1	TF-TG	ENSMUSG00000032035 (TF-TG) ENSMUSG00000035164
6623	false	-1	TF-TG	ENSMUSG00000032035 (TF-TG) ENSMUSG00000035273
4574	false	-1	TF-TG	ENSMUSG00000068154 (TF-TG) ENSMUSG00000023247
6621	false	-1	TF-TG	ENSMUSG00000032035 (TF-TG) ENSMUSG00000035357
4565	false	-1	TF-TG	ENSMUSG00000068154 (TF-TG) ENSMUSG00000024175
4564	false	-1	TF-TG	ENSMUSG00000068154 (TF-TG) ENSMUSG00000024193
6610	false	-1	TF-TG	ENSMUSG00000032035 (TF-TG) ENSMUSG00000035683
4560	false	-1	TF-TG	ENSMUSG00000068154 (TF-TG) ENSMUSG00000024366
4558	false	-1	TF-TG	ENSMUSG00000068154 (TF-TG) ENSMUSG00000024516
4556	false	-1	TF-TG	ENSMUSG00000068154 (TF-TG) ENSMUSG00000024533
6604	false	-1	TF-TG	ENSMUSG00000032035 (TF-TG) ENSMUSG00000035849
4551	false	-1	TF-TG	ENSMUSG00000068154 (TF-TG) ENSMUSG00000024777
6598	false	-1	TF-TG	ENSMUSG00000032035 (TF-TG) ENSMUSG00000036036
4549	false	-1	TF-TG	ENSMUSG00000068154 (TF-TG) ENSMUSG00000024891
6595	false	-1	TF-TG	ENSMUSG00000032035 (TF-TG) ENSMUSG00000036223
6594	false	-1	TF-TG	ENSMUSG00000032035 (TF-TG) ENSMUSG00000036256
4542	false	-1	TF-TG	ENSMUSG00000068154 (TF-TG) ENSMUSG00000025351
6588	false	-1	TF-TG	ENSMUSG00000032035 (TF-TG) ENSMUSG00000036745
4538	false	-1	TF-TG	ENSMUSG00000068154 (TF-TG) ENSMUSG00000025969
6586	false	-1	TF-TG	ENSMUSG00000032035 (TF-TG) ENSMUSG00000036777
6585	false	-1	TF-TG	ENSMUSG00000032035 (TF-TG) ENSMUSG00000036863
6583	false	-1	TF-TG	ENSMUSG00000032035 (TF-TG) ENSMUSG00000036887
4531	false	-1	TF-TG	ENSMUSG00000068154 (TF-TG) ENSMUSG00000026355
6579	false	-1	TF-TG	ENSMUSG00000032035 (TF-TG) ENSMUSG00000036944
4527	false	-1	TF-TG	ENSMUSG00000068154 (TF-TG) ENSMUSG00000026483
4525	false	-1	TF-TG	ENSMUSG00000068154 (TF-TG) ENSMUSG00000026669
4524	false	-1	TF-TG	ENSMUSG00000068154 (TF-TG) ENSMUSG00000026683
6572	false	-1	TF-TG	ENSMUSG00000032035 (TF-TG) ENSMUSG00000037159
4520	false	-1	TF-TG	ENSMUSG00000068154 (TF-TG) ENSMUSG00000027075
6566	false	-1	TF-TG	ENSMUSG00000032035 (TF-TG) ENSMUSG00000037509
4517	false	-1	TF-TG	ENSMUSG00000068154 (TF-TG) ENSMUSG00000027273
6564	false	-1	TF-TG	ENSMUSG00000032035 (TF-TG) ENSMUSG00000037580
4512	false	-1	TF-TG	ENSMUSG00000068154 (TF-TG) ENSMUSG00000027420
6558	false	-1	TF-TG	ENSMUSG00000032035 (TF-TG) ENSMUSG00000037643
4508	false	-1	TF-TG	ENSMUSG00000068154 (TF-TG) ENSMUSG00000027533
4507	false	-1	TF-TG	ENSMUSG00000068154 (TF-TG) ENSMUSG00000027661
6555	false	-1	TF-TG	ENSMUSG00000032035 (TF-TG) ENSMUSG00000037820
4502	false	-1	TF-TG	ENSMUSG00000068154 (TF-TG) ENSMUSG00000027931
4500	false	-1	TF-TG	ENSMUSG00000068154 (TF-TG) ENSMUSG00000028282
6548	false	-1	TF-TG	ENSMUSG00000032035 (TF-TG) ENSMUSG00000038005
4498	false	-1	TF-TG	ENSMUSG00000068154 (TF-TG) ENSMUSG00000028356
6546	false	-1	TF-TG	ENSMUSG00000032035 (TF-TG) ENSMUSG00000038068
4497	false	-1	TF-TG	ENSMUSG00000068154 (TF-TG) ENSMUSG00000028415
4496	false	-1	TF-TG	ENSMUSG00000068154 (TF-TG) ENSMUSG00000028634
4495	false	-1	TF-TG	ENSMUSG00000068154 (TF-TG) ENSMUSG00000028699
4493	false	-1	TF-TG	ENSMUSG00000068154 (TF-TG) ENSMUSG00000028825
6541	false	-1	TF-TG	ENSMUSG00000032035 (TF-TG) ENSMUSG00000038241
4492	false	-1	TF-TG	ENSMUSG00000068154 (TF-TG) ENSMUSG00000028927
6537	false	-1	TF-TG	ENSMUSG00000032035 (TF-TG) ENSMUSG00000038319
6536	false	-1	TF-TG	ENSMUSG00000032035 (TF-TG) ENSMUSG00000038349
6529	false	-1	TF-TG	ENSMUSG00000032035 (TF-TG) ENSMUSG00000038486
6526	false	-1	TF-TG	ENSMUSG00000032035 (TF-TG) ENSMUSG00000038578
4476	false	-1	TF-TG	ENSMUSG00000068154 (TF-TG) ENSMUSG00000031629
4475	false	-1	TF-TG	ENSMUSG00000068154 (TF-TG) ENSMUSG00000031668
4473	false	-1	TF-TG	ENSMUSG00000068154 (TF-TG) ENSMUSG00000031790
4471	false	-1	TF-TG	ENSMUSG00000068154 (TF-TG) ENSMUSG00000031981
6518	false	-1	TF-TG	ENSMUSG00000032035 (TF-TG) ENSMUSG00000038903
20850	false	-1	TF-TG	ENSMUSG00000022346 (TF-TG) ENSMUSG00000000125
6513	false	-1	TF-TG	ENSMUSG00000032035 (TF-TG) ENSMUSG00000039145
20846	false	-1	TF-TG	ENSMUSG00000022346 (TF-TG) ENSMUSG00000000214
20845	false	-1	TF-TG	ENSMUSG00000022346 (TF-TG) ENSMUSG00000000253
4461	false	-1	TF-TG	ENSMUSG00000068154 (TF-TG) ENSMUSG00000032350
6506	false	-1	TF-TG	ENSMUSG00000032035 (TF-TG) ENSMUSG00000039234
20839	false	-1	TF-TG	ENSMUSG00000022346 (TF-TG) ENSMUSG00000000555
6503	false	-1	TF-TG	ENSMUSG00000032035 (TF-TG) ENSMUSG00000039323
6502	false	-1	TF-TG	ENSMUSG00000032035 (TF-TG) ENSMUSG00000039372
20837	false	-1	TF-TG	ENSMUSG00000022346 (TF-TG) ENSMUSG00000000594
6501	false	-1	TF-TG	ENSMUSG00000032035 (TF-TG) ENSMUSG00000039384
6500	false	-1	TF-TG	ENSMUSG00000032035 (TF-TG) ENSMUSG00000039395
20835	false	-1	TF-TG	ENSMUSG00000022346 (TF-TG) ENSMUSG00000001025
20834	false	-1	TF-TG	ENSMUSG00000022346 (TF-TG) ENSMUSG00000001120
20829	false	-1	TF-TG	ENSMUSG00000022346 (TF-TG) ENSMUSG00000001525
20828	false	-1	TF-TG	ENSMUSG00000022346 (TF-TG) ENSMUSG00000001761
4443	false	-1	TF-TG	ENSMUSG00000068154 (TF-TG) ENSMUSG00000034768
6489	false	-1	TF-TG	ENSMUSG00000032035 (TF-TG) ENSMUSG00000039831
20824	false	-1	TF-TG	ENSMUSG00000022346 (TF-TG) ENSMUSG00000001985
20822	false	-1	TF-TG	ENSMUSG00000022346 (TF-TG) ENSMUSG00000002055
4436	false	-1	TF-TG	ENSMUSG00000068154 (TF-TG) ENSMUSG00000035164
6483	false	-1	TF-TG	ENSMUSG00000032035 (TF-TG) ENSMUSG00000040046
4431	false	-1	TF-TG	ENSMUSG00000068154 (TF-TG) ENSMUSG00000035849
20814	false	-1	TF-TG	ENSMUSG00000022346 (TF-TG) ENSMUSG00000002565
20812	false	-1	TF-TG	ENSMUSG00000022346 (TF-TG) ENSMUSG00000002835
20811	false	-1	TF-TG	ENSMUSG00000022346 (TF-TG) ENSMUSG00000002870
6475	false	-1	TF-TG	ENSMUSG00000032035 (TF-TG) ENSMUSG00000040276
6474	false	-1	TF-TG	ENSMUSG00000032035 (TF-TG) ENSMUSG00000040339
4425	false	-1	TF-TG	ENSMUSG00000068154 (TF-TG) ENSMUSG00000036777
6472	false	-1	TF-TG	ENSMUSG00000032035 (TF-TG) ENSMUSG00000040433
6471	false	-1	TF-TG	ENSMUSG00000032035 (TF-TG) ENSMUSG00000040462
4422	false	-1	TF-TG	ENSMUSG00000068154 (TF-TG) ENSMUSG00000036944
20804	false	-1	TF-TG	ENSMUSG00000022346 (TF-TG) ENSMUSG00000003283
20803	false	-1	TF-TG	ENSMUSG00000022346 (TF-TG) ENSMUSG00000003355
20802	false	-1	TF-TG	ENSMUSG00000022346 (TF-TG) ENSMUSG00000003411
20800	false	-1	TF-TG	ENSMUSG00000022346 (TF-TG) ENSMUSG00000003436
4416	false	-1	TF-TG	ENSMUSG00000068154 (TF-TG) ENSMUSG00000037580
20798	false	-1	TF-TG	ENSMUSG00000022346 (TF-TG) ENSMUSG00000003545
10558	false	-1	TF-TG	ENSMUSG00000036036 (TF-TG) ENSMUSG00000000125
20797	false	-1	TF-TG	ENSMUSG00000022346 (TF-TG) ENSMUSG00000003992
4413	false	-1	TF-TG	ENSMUSG00000068154 (TF-TG) ENSMUSG00000037820
6461	false	-1	TF-TG	ENSMUSG00000032035 (TF-TG) ENSMUSG00000040717
4411	false	-1	TF-TG	ENSMUSG00000068154 (TF-TG) ENSMUSG00000038005
10555	false	-1	TF-TG	ENSMUSG00000036036 (TF-TG) ENSMUSG00000000214
4409	false	-1	TF-TG	ENSMUSG00000068154 (TF-TG) ENSMUSG00000038241
10553	false	-1	TF-TG	ENSMUSG00000036036 (TF-TG) ENSMUSG00000000555
4407	false	-1	TF-TG	ENSMUSG00000068154 (TF-TG) ENSMUSG00000038319
20790	false	-1	TF-TG	ENSMUSG00000022346 (TF-TG) ENSMUSG00000004709
4406	false	-1	TF-TG	ENSMUSG00000068154 (TF-TG) ENSMUSG00000038349
10550	false	-1	TF-TG	ENSMUSG00000036036 (TF-TG) ENSMUSG00000001120
20789	false	-1	TF-TG	ENSMUSG00000022346 (TF-TG) ENSMUSG00000004951
20787	false	-1	TF-TG	ENSMUSG00000022346 (TF-TG) ENSMUSG00000005267
10545	false	-1	TF-TG	ENSMUSG00000036036 (TF-TG) ENSMUSG00000001985
10544	false	-1	TF-TG	ENSMUSG00000036036 (TF-TG) ENSMUSG00000002055
6446	false	-1	TF-TG	ENSMUSG00000032035 (TF-TG) ENSMUSG00000041168
10542	false	-1	TF-TG	ENSMUSG00000036036 (TF-TG) ENSMUSG00000002565
6445	false	-1	TF-TG	ENSMUSG00000032035 (TF-TG) ENSMUSG00000041202
4396	false	-1	TF-TG	ENSMUSG00000068154 (TF-TG) ENSMUSG00000038903
6444	false	-1	TF-TG	ENSMUSG00000032035 (TF-TG) ENSMUSG00000041268
4395	false	-1	TF-TG	ENSMUSG00000068154 (TF-TG) ENSMUSG00000039115
6442	false	-1	TF-TG	ENSMUSG00000032035 (TF-TG) ENSMUSG00000041351
20777	false	-1	TF-TG	ENSMUSG00000022346 (TF-TG) ENSMUSG00000006386
4393	false	-1	TF-TG	ENSMUSG00000068154 (TF-TG) ENSMUSG00000039145
10537	false	-1	TF-TG	ENSMUSG00000036036 (TF-TG) ENSMUSG00000003283
10536	false	-1	TF-TG	ENSMUSG00000036036 (TF-TG) ENSMUSG00000003411
4391	false	-1	TF-TG	ENSMUSG00000068154 (TF-TG) ENSMUSG00000039234
6439	false	-1	TF-TG	ENSMUSG00000032035 (TF-TG) ENSMUSG00000041420
10535	false	-1	TF-TG	ENSMUSG00000036036 (TF-TG) ENSMUSG00000003436
4390	false	-1	TF-TG	ENSMUSG00000068154 (TF-TG) ENSMUSG00000039372
10534	false	-1	TF-TG	ENSMUSG00000036036 (TF-TG) ENSMUSG00000003469
4389	false	-1	TF-TG	ENSMUSG00000068154 (TF-TG) ENSMUSG00000039384
10533	false	-1	TF-TG	ENSMUSG00000036036 (TF-TG) ENSMUSG00000003545
4388	false	-1	TF-TG	ENSMUSG00000068154 (TF-TG) ENSMUSG00000039395
4384	false	-1	TF-TG	ENSMUSG00000068154 (TF-TG) ENSMUSG00000039831
6431	false	-1	TF-TG	ENSMUSG00000032035 (TF-TG) ENSMUSG00000041688
4381	false	-1	TF-TG	ENSMUSG00000068154 (TF-TG) ENSMUSG00000040046
10525	false	-1	TF-TG	ENSMUSG00000036036 (TF-TG) ENSMUSG00000004709
6428	false	-1	TF-TG	ENSMUSG00000032035 (TF-TG) ENSMUSG00000041801
10524	false	-1	TF-TG	ENSMUSG00000036036 (TF-TG) ENSMUSG00000004951
10522	false	-1	TF-TG	ENSMUSG00000036036 (TF-TG) ENSMUSG00000005267
4377	false	-1	TF-TG	ENSMUSG00000068154 (TF-TG) ENSMUSG00000040276
20759	false	-1	TF-TG	ENSMUSG00000022346 (TF-TG) ENSMUSG00000007989
4373	false	-1	TF-TG	ENSMUSG00000068154 (TF-TG) ENSMUSG00000040717
20753	false	-1	TF-TG	ENSMUSG00000022346 (TF-TG) ENSMUSG00000009108
10513	false	-1	TF-TG	ENSMUSG00000036036 (TF-TG) ENSMUSG00000007989
20751	false	-1	TF-TG	ENSMUSG00000022346 (TF-TG) ENSMUSG00000009292
6412	false	-1	TF-TG	ENSMUSG00000032035 (TF-TG) ENSMUSG00000042462
6411	false	-1	TF-TG	ENSMUSG00000032035 (TF-TG) ENSMUSG00000042489
10507	false	-1	TF-TG	ENSMUSG00000036036 (TF-TG) ENSMUSG00000009108
10505	false	-1	TF-TG	ENSMUSG00000036036 (TF-TG) ENSMUSG00000009292
20744	false	-1	TF-TG	ENSMUSG00000022346 (TF-TG) ENSMUSG00000010362
10502	false	-1	TF-TG	ENSMUSG00000036036 (TF-TG) ENSMUSG00000010021
20741	false	-1	TF-TG	ENSMUSG00000022346 (TF-TG) ENSMUSG00000010825
6405	false	-1	TF-TG	ENSMUSG00000032035 (TF-TG) ENSMUSG00000042804
20740	false	-1	TF-TG	ENSMUSG00000022346 (TF-TG) ENSMUSG00000010830
4356	false	-1	TF-TG	ENSMUSG00000068154 (TF-TG) ENSMUSG00000042462
6404	false	-1	TF-TG	ENSMUSG00000032035 (TF-TG) ENSMUSG00000042842
10500	false	-1	TF-TG	ENSMUSG00000036036 (TF-TG) ENSMUSG00000010362
10498	false	-1	TF-TG	ENSMUSG00000036036 (TF-TG) ENSMUSG00000010825
10497	false	-1	TF-TG	ENSMUSG00000036036 (TF-TG) ENSMUSG00000010830
20735	false	-1	TF-TG	ENSMUSG00000022346 (TF-TG) ENSMUSG00000013523
4351	false	-1	TF-TG	ENSMUSG00000068154 (TF-TG) ENSMUSG00000043015
6399	false	-1	TF-TG	ENSMUSG00000032035 (TF-TG) ENSMUSG00000043015
20734	false	-1	TF-TG	ENSMUSG00000022346 (TF-TG) ENSMUSG00000013698
20733	false	-1	TF-TG	ENSMUSG00000022346 (TF-TG) ENSMUSG00000013846
10492	false	-1	TF-TG	ENSMUSG00000036036 (TF-TG) ENSMUSG00000013523
20731	false	-1	TF-TG	ENSMUSG00000022346 (TF-TG) ENSMUSG00000014164
6395	false	-1	TF-TG	ENSMUSG00000032035 (TF-TG) ENSMUSG00000043154
10491	false	-1	TF-TG	ENSMUSG00000036036 (TF-TG) ENSMUSG00000013846
20728	false	-1	TF-TG	ENSMUSG00000022346 (TF-TG) ENSMUSG00000014786
4344	false	-1	TF-TG	ENSMUSG00000068154 (TF-TG) ENSMUSG00000044005
10487	false	-1	TF-TG	ENSMUSG00000036036 (TF-TG) ENSMUSG00000015468
4342	false	-1	TF-TG	ENSMUSG00000068154 (TF-TG) ENSMUSG00000044626
4341	false	-1	TF-TG	ENSMUSG00000068154 (TF-TG) ENSMUSG00000045007
6389	false	-1	TF-TG	ENSMUSG00000032035 (TF-TG) ENSMUSG00000044005
20724	false	-1	TF-TG	ENSMUSG00000022346 (TF-TG) ENSMUSG00000015468
10483	false	-1	TF-TG	ENSMUSG00000036036 (TF-TG) ENSMUSG00000016200
4337	false	-1	TF-TG	ENSMUSG00000068154 (TF-TG) ENSMUSG00000045790
20719	false	-1	TF-TG	ENSMUSG00000022346 (TF-TG) ENSMUSG00000016200
10476	false	-1	TF-TG	ENSMUSG00000036036 (TF-TG) ENSMUSG00000017607
6377	false	-1	TF-TG	ENSMUSG00000032035 (TF-TG) ENSMUSG00000044626
6376	false	-1	TF-TG	ENSMUSG00000032035 (TF-TG) ENSMUSG00000044646
10469	false	-1	TF-TG	ENSMUSG00000036036 (TF-TG) ENSMUSG00000018554
20708	false	-1	TF-TG	ENSMUSG00000022346 (TF-TG) ENSMUSG00000017493
20707	false	-1	TF-TG	ENSMUSG00000022346 (TF-TG) ENSMUSG00000017499
20705	false	-1	TF-TG	ENSMUSG00000022346 (TF-TG) ENSMUSG00000017607
6368	false	-1	TF-TG	ENSMUSG00000032035 (TF-TG) ENSMUSG00000045007
4318	false	-1	TF-TG	ENSMUSG00000068154 (TF-TG) ENSMUSG00000047963
20701	false	-1	TF-TG	ENSMUSG00000022346 (TF-TG) ENSMUSG00000017716
10461	false	-1	TF-TG	ENSMUSG00000036036 (TF-TG) ENSMUSG00000019235
4316	false	-1	TF-TG	ENSMUSG00000068154 (TF-TG) ENSMUSG00000048970
4315	false	-1	TF-TG	ENSMUSG00000068154 (TF-TG) ENSMUSG00000049154
10459	false	-1	TF-TG	ENSMUSG00000036036 (TF-TG) ENSMUSG00000019303
6361	false	-1	TF-TG	ENSMUSG00000032035 (TF-TG) ENSMUSG00000045518
10456	false	-1	TF-TG	ENSMUSG00000036036 (TF-TG) ENSMUSG00000019775
6359	false	-1	TF-TG	ENSMUSG00000032035 (TF-TG) ENSMUSG00000045751
10455	false	-1	TF-TG	ENSMUSG00000036036 (TF-TG) ENSMUSG00000019796
4309	false	-1	TF-TG	ENSMUSG00000068154 (TF-TG) ENSMUSG00000050824
20691	false	-1	TF-TG	ENSMUSG00000022346 (TF-TG) ENSMUSG00000018554
10450	false	-1	TF-TG	ENSMUSG00000036036 (TF-TG) ENSMUSG00000019945
20689	false	-1	TF-TG	ENSMUSG00000022346 (TF-TG) ENSMUSG00000018672
4305	false	-1	TF-TG	ENSMUSG00000068154 (TF-TG) ENSMUSG00000051314
4303	false	-1	TF-TG	ENSMUSG00000068154 (TF-TG) ENSMUSG00000052117
6351	false	-1	TF-TG	ENSMUSG00000032035 (TF-TG) ENSMUSG00000046204
6350	false	-1	TF-TG	ENSMUSG00000032035 (TF-TG) ENSMUSG00000046223
8396	false	-1	TF-TG	ENSMUSG00000024912 (TF-TG) ENSMUSG00000000555
4299	false	-1	TF-TG	ENSMUSG00000068154 (TF-TG) ENSMUSG00000053414
6347	false	-1	TF-TG	ENSMUSG00000032035 (TF-TG) ENSMUSG00000046410
20680	false	-1	TF-TG	ENSMUSG00000022346 (TF-TG) ENSMUSG00000019235
4296	false	-1	TF-TG	ENSMUSG00000068154 (TF-TG) ENSMUSG00000053765
8392	false	-1	TF-TG	ENSMUSG00000024912 (TF-TG) ENSMUSG00000004951
4295	false	-1	TF-TG	ENSMUSG00000068154 (TF-TG) ENSMUSG00000053963
8391	false	-1	TF-TG	ENSMUSG00000024912 (TF-TG) ENSMUSG00000005267
20678	false	-1	TF-TG	ENSMUSG00000022346 (TF-TG) ENSMUSG00000019303
20674	false	-1	TF-TG	ENSMUSG00000022346 (TF-TG) ENSMUSG00000019775
10434	false	-1	TF-TG	ENSMUSG00000036036 (TF-TG) ENSMUSG00000020226
20673	false	-1	TF-TG	ENSMUSG00000022346 (TF-TG) ENSMUSG00000019796
8385	false	-1	TF-TG	ENSMUSG00000024912 (TF-TG) ENSMUSG00000010021
6337	false	-1	TF-TG	ENSMUSG00000032035 (TF-TG) ENSMUSG00000046841
8383	false	-1	TF-TG	ENSMUSG00000024912 (TF-TG) ENSMUSG00000013846
6334	false	-1	TF-TG	ENSMUSG00000032035 (TF-TG) ENSMUSG00000047109
8381	false	-1	TF-TG	ENSMUSG00000024912 (TF-TG) ENSMUSG00000014786
4284	false	-1	TF-TG	ENSMUSG00000068154 (TF-TG) ENSMUSG00000055567
6331	false	-1	TF-TG	ENSMUSG00000032035 (TF-TG) ENSMUSG00000047181
4282	false	-1	TF-TG	ENSMUSG00000068154 (TF-TG) ENSMUSG00000055805
10426	false	-1	TF-TG	ENSMUSG00000036036 (TF-TG) ENSMUSG00000020571
20665	false	-1	TF-TG	ENSMUSG00000022346 (TF-TG) ENSMUSG00000019945
8377	false	-1	TF-TG	ENSMUSG00000024912 (TF-TG) ENSMUSG00000017716
4280	false	-1	TF-TG	ENSMUSG00000068154 (TF-TG) ENSMUSG00000056050
8375	false	-1	TF-TG	ENSMUSG00000024912 (TF-TG) ENSMUSG00000019775
10422	false	-1	TF-TG	ENSMUSG00000036036 (TF-TG) ENSMUSG00000020649
8373	false	-1	TF-TG	ENSMUSG00000024912 (TF-TG) ENSMUSG00000020649
20660	false	-1	TF-TG	ENSMUSG00000022346 (TF-TG) ENSMUSG00000019992
14513	false	-1	TF-TG	ENSMUSG00000026398 (TF-TG) ENSMUSG00000000214
14512	false	-1	TF-TG	ENSMUSG00000026398 (TF-TG) ENSMUSG00000000594
4272	false	-1	TF-TG	ENSMUSG00000068154 (TF-TG) ENSMUSG00000058070
8368	false	-1	TF-TG	ENSMUSG00000024912 (TF-TG) ENSMUSG00000022003
8367	false	-1	TF-TG	ENSMUSG00000024912 (TF-TG) ENSMUSG00000022148
14510	false	-1	TF-TG	ENSMUSG00000026398 (TF-TG) ENSMUSG00000003355
10414	false	-1	TF-TG	ENSMUSG00000036036 (TF-TG) ENSMUSG00000020900
10413	false	-1	TF-TG	ENSMUSG00000036036 (TF-TG) ENSMUSG00000020901
14508	false	-1	TF-TG	ENSMUSG00000026398 (TF-TG) ENSMUSG00000004709
10412	false	-1	TF-TG	ENSMUSG00000036036 (TF-TG) ENSMUSG00000021061
20651	false	-1	TF-TG	ENSMUSG00000022346 (TF-TG) ENSMUSG00000020151
14507	false	-1	TF-TG	ENSMUSG00000026398 (TF-TG) ENSMUSG00000004951
10411	false	-1	TF-TG	ENSMUSG00000036036 (TF-TG) ENSMUSG00000021136
4266	false	-1	TF-TG	ENSMUSG00000068154 (TF-TG) ENSMUSG00000059713
6312	false	-1	TF-TG	ENSMUSG00000032035 (TF-TG) ENSMUSG00000047878
4263	false	-1	TF-TG	ENSMUSG00000068154 (TF-TG) ENSMUSG00000061607
8359	false	-1	TF-TG	ENSMUSG00000024912 (TF-TG) ENSMUSG00000023886
6311	false	-1	TF-TG	ENSMUSG00000032035 (TF-TG) ENSMUSG00000047963
8358	false	-1	TF-TG	ENSMUSG00000024912 (TF-TG) ENSMUSG00000024512
8357	false	-1	TF-TG	ENSMUSG00000024912 (TF-TG) ENSMUSG00000024516
20644	false	-1	TF-TG	ENSMUSG00000022346 (TF-TG) ENSMUSG00000020226
4259	false	-1	TF-TG	ENSMUSG00000068154 (TF-TG) ENSMUSG00000062760
10403	false	-1	TF-TG	ENSMUSG00000036036 (TF-TG) ENSMUSG00000021396
6302	false	-1	TF-TG	ENSMUSG00000032035 (TF-TG) ENSMUSG00000048349
10398	false	-1	TF-TG	ENSMUSG00000036036 (TF-TG) ENSMUSG00000021572
8349	false	-1	TF-TG	ENSMUSG00000024912 (TF-TG) ENSMUSG00000025064
4252	false	-1	TF-TG	ENSMUSG00000068154 (TF-TG) ENSMUSG00000068196
8348	false	-1	TF-TG	ENSMUSG00000024912 (TF-TG) ENSMUSG00000025075
4251	false	-1	TF-TG	ENSMUSG00000068154 (TF-TG) ENSMUSG00000068735
4250	false	-1	TF-TG	ENSMUSG00000068154 (TF-TG) ENSMUSG00000069227
8346	false	-1	TF-TG	ENSMUSG00000024912 (TF-TG) ENSMUSG00000025742
14489	false	-1	TF-TG	ENSMUSG00000026398 (TF-TG) ENSMUSG00000018672
10393	false	-1	TF-TG	ENSMUSG00000036036 (TF-TG) ENSMUSG00000021831
20632	false	-1	TF-TG	ENSMUSG00000022346 (TF-TG) ENSMUSG00000020462
10392	false	-1	TF-TG	ENSMUSG00000036036 (TF-TG) ENSMUSG00000021838
14487	false	-1	TF-TG	ENSMUSG00000026398 (TF-TG) ENSMUSG00000019303
10391	false	-1	TF-TG	ENSMUSG00000036036 (TF-TG) ENSMUSG00000021846
20630	false	-1	TF-TG	ENSMUSG00000022346 (TF-TG) ENSMUSG00000020471
8342	false	-1	TF-TG	ENSMUSG00000024912 (TF-TG) ENSMUSG00000026303
6294	false	-1	TF-TG	ENSMUSG00000032035 (TF-TG) ENSMUSG00000048970
10390	false	-1	TF-TG	ENSMUSG00000036036 (TF-TG) ENSMUSG00000021876
4245	false	-1	TF-TG	ENSMUSG00000068154 (TF-TG) ENSMUSG00000070498
20628	false	-1	TF-TG	ENSMUSG00000022346 (TF-TG) ENSMUSG00000020571
14484	false	-1	TF-TG	ENSMUSG00000026398 (TF-TG) ENSMUSG00000019945
10388	false	-1	TF-TG	ENSMUSG00000036036 (TF-TG) ENSMUSG00000021986
14483	false	-1	TF-TG	ENSMUSG00000026398 (TF-TG) ENSMUSG00000019992
4243	false	-1	TF-TG	ENSMUSG00000068154 (TF-TG) ENSMUSG00000070867
8339	false	-1	TF-TG	ENSMUSG00000024912 (TF-TG) ENSMUSG00000026646
6291	false	-1	TF-TG	ENSMUSG00000032035 (TF-TG) ENSMUSG00000049154
10387	false	-1	TF-TG	ENSMUSG00000036036 (TF-TG) ENSMUSG00000022003
8338	false	-1	TF-TG	ENSMUSG00000024912 (TF-TG) ENSMUSG00000026683
6290	false	-1	TF-TG	ENSMUSG00000032035 (TF-TG) ENSMUSG00000049288
10385	false	-1	TF-TG	ENSMUSG00000036036 (TF-TG) ENSMUSG00000022021
4240	false	-1	TF-TG	ENSMUSG00000068154 (TF-TG) ENSMUSG00000072115
4239	false	-1	TF-TG	ENSMUSG00000068154 (TF-TG) ENSMUSG00000072235
20620	false	-1	TF-TG	ENSMUSG00000022346 (TF-TG) ENSMUSG00000020649
10380	false	-1	TF-TG	ENSMUSG00000036036 (TF-TG) ENSMUSG00000022148
14474	false	-1	TF-TG	ENSMUSG00000026398 (TF-TG) ENSMUSG00000020901
10378	false	-1	TF-TG	ENSMUSG00000036036 (TF-TG) ENSMUSG00000022211
14473	false	-1	TF-TG	ENSMUSG00000026398 (TF-TG) ENSMUSG00000021136
4233	false	-1	TF-TG	ENSMUSG00000068154 (TF-TG) ENSMUSG00000074892
10376	false	-1	TF-TG	ENSMUSG00000036036 (TF-TG) ENSMUSG00000022346
8326	false	-1	TF-TG	ENSMUSG00000024912 (TF-TG) ENSMUSG00000028555
4229	false	-1	TF-TG	ENSMUSG00000068154 (TF-TG) ENSMUSG00000078773
20612	false	-1	TF-TG	ENSMUSG00000022346 (TF-TG) ENSMUSG00000020788
14468	false	-1	TF-TG	ENSMUSG00000026398 (TF-TG) ENSMUSG00000021831
8324	false	-1	TF-TG	ENSMUSG00000024912 (TF-TG) ENSMUSG00000028602
10372	false	-1	TF-TG	ENSMUSG00000036036 (TF-TG) ENSMUSG00000022489
14467	false	-1	TF-TG	ENSMUSG00000026398 (TF-TG) ENSMUSG00000021876
4227	false	-1	TF-TG	ENSMUSG00000068154 (TF-TG) ENSMUSG00000079038
6275	false	-1	TF-TG	ENSMUSG00000032035 (TF-TG) ENSMUSG00000050335
20609	false	-1	TF-TG	ENSMUSG00000022346 (TF-TG) ENSMUSG00000020846
4225	false	-1	TF-TG	ENSMUSG00000068154 (TF-TG) ENSMUSG00000089789
14464	false	-1	TF-TG	ENSMUSG00000026398 (TF-TG) ENSMUSG00000022211
14463	false	-1	TF-TG	ENSMUSG00000026398 (TF-TG) ENSMUSG00000022253
8318	false	-1	TF-TG	ENSMUSG00000024912 (TF-TG) ENSMUSG00000030329
4221	false	-1	TF-TG	ENSMUSG00000068154 (TF-TG) ENSMUSG00000092486
20604	false	-1	TF-TG	ENSMUSG00000022346 (TF-TG) ENSMUSG00000020900
20603	false	-1	TF-TG	ENSMUSG00000022346 (TF-TG) ENSMUSG00000020901
14459	false	-1	TF-TG	ENSMUSG00000026398 (TF-TG) ENSMUSG00000022840
4219	false	-1	TF-TG	ENSMUSG00000068154 (TF-TG) ENSMUSG00000094928
8315	false	-1	TF-TG	ENSMUSG00000024912 (TF-TG) ENSMUSG00000031757
10363	false	-1	TF-TG	ENSMUSG00000036036 (TF-TG) ENSMUSG00000022762
4218	false	-1	TF-TG	ENSMUSG00000068154 (TF-TG) ENSMUSG00000096847
10362	false	-1	TF-TG	ENSMUSG00000036036 (TF-TG) ENSMUSG00000022769
8313	false	-1	TF-TG	ENSMUSG00000024912 (TF-TG) ENSMUSG00000031788
6265	false	-1	TF-TG	ENSMUSG00000032035 (TF-TG) ENSMUSG00000050824
10361	false	-1	TF-TG	ENSMUSG00000036036 (TF-TG) ENSMUSG00000022773
10360	false	-1	TF-TG	ENSMUSG00000036036 (TF-TG) ENSMUSG00000022840
20599	false	-1	TF-TG	ENSMUSG00000022346 (TF-TG) ENSMUSG00000021061
8311	false	-1	TF-TG	ENSMUSG00000024912 (TF-TG) ENSMUSG00000032035
10357	false	-1	TF-TG	ENSMUSG00000036036 (TF-TG) ENSMUSG00000022912
20596	false	-1	TF-TG	ENSMUSG00000022346 (TF-TG) ENSMUSG00000021136
10355	false	-1	TF-TG	ENSMUSG00000036036 (TF-TG) ENSMUSG00000022945
8304	false	-1	TF-TG	ENSMUSG00000024912 (TF-TG) ENSMUSG00000033825
6256	false	-1	TF-TG	ENSMUSG00000032035 (TF-TG) ENSMUSG00000051251
14447	false	-1	TF-TG	ENSMUSG00000026398 (TF-TG) ENSMUSG00000024891
6255	false	-1	TF-TG	ENSMUSG00000032035 (TF-TG) ENSMUSG00000051314
8302	false	-1	TF-TG	ENSMUSG00000024912 (TF-TG) ENSMUSG00000034579
8300	false	-1	TF-TG	ENSMUSG00000024912 (TF-TG) ENSMUSG00000034656
6252	false	-1	TF-TG	ENSMUSG00000032035 (TF-TG) ENSMUSG00000051457
10348	false	-1	TF-TG	ENSMUSG00000036036 (TF-TG) ENSMUSG00000023066
10346	false	-1	TF-TG	ENSMUSG00000036036 (TF-TG) ENSMUSG00000023247
20584	false	-1	TF-TG	ENSMUSG00000022346 (TF-TG) ENSMUSG00000021391
14440	false	-1	TF-TG	ENSMUSG00000026398 (TF-TG) ENSMUSG00000025969
20583	false	-1	TF-TG	ENSMUSG00000022346 (TF-TG) ENSMUSG00000021396
10343	false	-1	TF-TG	ENSMUSG00000036036 (TF-TG) ENSMUSG00000023886
8294	false	-1	TF-TG	ENSMUSG00000024912 (TF-TG) ENSMUSG00000036777
6245	false	-1	TF-TG	ENSMUSG00000032035 (TF-TG) ENSMUSG00000052117
14436	false	-1	TF-TG	ENSMUSG00000026398 (TF-TG) ENSMUSG00000026380
8291	false	-1	TF-TG	ENSMUSG00000024912 (TF-TG) ENSMUSG00000037820
20577	false	-1	TF-TG	ENSMUSG00000022346 (TF-TG) ENSMUSG00000021572
8289	false	-1	TF-TG	ENSMUSG00000024912 (TF-TG) ENSMUSG00000038241
14432	false	-1	TF-TG	ENSMUSG00000026398 (TF-TG) ENSMUSG00000026669
6240	false	-1	TF-TG	ENSMUSG00000032035 (TF-TG) ENSMUSG00000052384
10336	false	-1	TF-TG	ENSMUSG00000036036 (TF-TG) ENSMUSG00000024175
10335	false	-1	TF-TG	ENSMUSG00000036036 (TF-TG) ENSMUSG00000024193
8285	false	-1	TF-TG	ENSMUSG00000024912 (TF-TG) ENSMUSG00000038903
6237	false	-1	TF-TG	ENSMUSG00000032035 (TF-TG) ENSMUSG00000052921
10332	false	-1	TF-TG	ENSMUSG00000036036 (TF-TG) ENSMUSG00000024299
14427	false	-1	TF-TG	ENSMUSG00000026398 (TF-TG) ENSMUSG00000027075
14426	false	-1	TF-TG	ENSMUSG00000026398 (TF-TG) ENSMUSG00000027230
8282	false	-1	TF-TG	ENSMUSG00000024912 (TF-TG) ENSMUSG00000039145
8280	false	-1	TF-TG	ENSMUSG00000024912 (TF-TG) ENSMUSG00000040433
20567	false	-1	TF-TG	ENSMUSG00000022346 (TF-TG) ENSMUSG00000021831
14423	false	-1	TF-TG	ENSMUSG00000026398 (TF-TG) ENSMUSG00000027931
10327	false	-1	TF-TG	ENSMUSG00000036036 (TF-TG) ENSMUSG00000024516
6230	false	-1	TF-TG	ENSMUSG00000032035 (TF-TG) ENSMUSG00000053414
20565	false	-1	TF-TG	ENSMUSG00000022346 (TF-TG) ENSMUSG00000021838
10325	false	-1	TF-TG	ENSMUSG00000036036 (TF-TG) ENSMUSG00000024533
20564	false	-1	TF-TG	ENSMUSG00000022346 (TF-TG) ENSMUSG00000021846
14420	false	-1	TF-TG	ENSMUSG00000026398 (TF-TG) ENSMUSG00000028415
6228	false	-1	TF-TG	ENSMUSG00000032035 (TF-TG) ENSMUSG00000053580
20563	false	-1	TF-TG	ENSMUSG00000022346 (TF-TG) ENSMUSG00000021876
14418	false	-1	TF-TG	ENSMUSG00000026398 (TF-TG) ENSMUSG00000028532
20561	false	-1	TF-TG	ENSMUSG00000022346 (TF-TG) ENSMUSG00000021986
6225	false	-1	TF-TG	ENSMUSG00000032035 (TF-TG) ENSMUSG00000053765
14416	false	-1	TF-TG	ENSMUSG00000026398 (TF-TG) ENSMUSG00000028763
8272	false	-1	TF-TG	ENSMUSG00000024912 (TF-TG) ENSMUSG00000042842
20559	false	-1	TF-TG	ENSMUSG00000022346 (TF-TG) ENSMUSG00000022003
14415	false	-1	TF-TG	ENSMUSG00000026398 (TF-TG) ENSMUSG00000028825
6221	false	-1	TF-TG	ENSMUSG00000032035 (TF-TG) ENSMUSG00000053963
8268	false	-1	TF-TG	ENSMUSG00000024912 (TF-TG) ENSMUSG00000044626
10316	false	-1	TF-TG	ENSMUSG00000036036 (TF-TG) ENSMUSG00000024777
14411	false	-1	TF-TG	ENSMUSG00000026398 (TF-TG) ENSMUSG00000028909
20553	false	-1	TF-TG	ENSMUSG00000022346 (TF-TG) ENSMUSG00000022148
8265	false	-1	TF-TG	ENSMUSG00000024912 (TF-TG) ENSMUSG00000046223
10313	false	-1	TF-TG	ENSMUSG00000036036 (TF-TG) ENSMUSG00000024891
14408	false	-1	TF-TG	ENSMUSG00000026398 (TF-TG) ENSMUSG00000029343
8263	false	-1	TF-TG	ENSMUSG00000024912 (TF-TG) ENSMUSG00000047963
20550	false	-1	TF-TG	ENSMUSG00000022346 (TF-TG) ENSMUSG00000022211
6214	false	-1	TF-TG	ENSMUSG00000032035 (TF-TG) ENSMUSG00000054555
20549	false	-1	TF-TG	ENSMUSG00000022346 (TF-TG) ENSMUSG00000022253
6213	false	-1	TF-TG	ENSMUSG00000032035 (TF-TG) ENSMUSG00000054582
10309	false	-1	TF-TG	ENSMUSG00000036036 (TF-TG) ENSMUSG00000024912
6211	false	-1	TF-TG	ENSMUSG00000032035 (TF-TG) ENSMUSG00000054630
10306	false	-1	TF-TG	ENSMUSG00000036036 (TF-TG) ENSMUSG00000024989
14400	false	-1	TF-TG	ENSMUSG00000026398 (TF-TG) ENSMUSG00000030353
10302	false	-1	TF-TG	ENSMUSG00000036036 (TF-TG) ENSMUSG00000025064
14397	false	-1	TF-TG	ENSMUSG00000026398 (TF-TG) ENSMUSG00000030659
20540	false	-1	TF-TG	ENSMUSG00000022346 (TF-TG) ENSMUSG00000022489
8252	false	-1	TF-TG	ENSMUSG00000024912 (TF-TG) ENSMUSG00000052921
14393	false	-1	TF-TG	ENSMUSG00000026398 (TF-TG) ENSMUSG00000031629
14392	false	-1	TF-TG	ENSMUSG00000026398 (TF-TG) ENSMUSG00000031668
14391	false	-1	TF-TG	ENSMUSG00000026398 (TF-TG) ENSMUSG00000031730
6199	false	-1	TF-TG	ENSMUSG00000032035 (TF-TG) ENSMUSG00000055567
8245	false	-1	TF-TG	ENSMUSG00000024912 (TF-TG) ENSMUSG00000062760
6195	false	-1	TF-TG	ENSMUSG00000032035 (TF-TG) ENSMUSG00000055805
14386	false	-1	TF-TG	ENSMUSG00000026398 (TF-TG) ENSMUSG00000031981
20529	false	-1	TF-TG	ENSMUSG00000022346 (TF-TG) ENSMUSG00000022762
8241	false	-1	TF-TG	ENSMUSG00000024912 (TF-TG) ENSMUSG00000064090
10289	false	-1	TF-TG	ENSMUSG00000036036 (TF-TG) ENSMUSG00000025608
20528	false	-1	TF-TG	ENSMUSG00000022346 (TF-TG) ENSMUSG00000022769
14384	false	-1	TF-TG	ENSMUSG00000026398 (TF-TG) ENSMUSG00000032092
20527	false	-1	TF-TG	ENSMUSG00000022346 (TF-TG) ENSMUSG00000022773
8239	false	-1	TF-TG	ENSMUSG00000024912 (TF-TG) ENSMUSG00000069227
20525	false	-1	TF-TG	ENSMUSG00000022346 (TF-TG) ENSMUSG00000022840
8237	false	-1	TF-TG	ENSMUSG00000024912 (TF-TG) ENSMUSG00000072849
10285	false	-1	TF-TG	ENSMUSG00000036036 (TF-TG) ENSMUSG00000025876
10284	false	-1	TF-TG	ENSMUSG00000036036 (TF-TG) ENSMUSG00000025969
14379	false	-1	TF-TG	ENSMUSG00000026398 (TF-TG) ENSMUSG00000033032
8235	false	-1	TF-TG	ENSMUSG00000024912 (TF-TG) ENSMUSG00000074183
20521	false	-1	TF-TG	ENSMUSG00000022346 (TF-TG) ENSMUSG00000022881
8233	false	-1	TF-TG	ENSMUSG00000024912 (TF-TG) ENSMUSG00000078773
6185	false	-1	TF-TG	ENSMUSG00000032035 (TF-TG) ENSMUSG00000056531
6184	false	-1	TF-TG	ENSMUSG00000032035 (TF-TG) ENSMUSG00000056602
20519	false	-1	TF-TG	ENSMUSG00000022346 (TF-TG) ENSMUSG00000022912
8230	false	-1	TF-lincRNA	ENSMUSG00000024912 (TF-lincRNA) ENSMUSG00000085183
20517	false	-1	TF-TG	ENSMUSG00000022346 (TF-TG) ENSMUSG00000022945
6181	false	-1	TF-TG	ENSMUSG00000032035 (TF-TG) ENSMUSG00000056888
10277	false	-1	TF-TG	ENSMUSG00000036036 (TF-TG) ENSMUSG00000026303
6180	false	-1	TF-TG	ENSMUSG00000032035 (TF-TG) ENSMUSG00000057069
6178	false	-1	TF-TG	ENSMUSG00000032035 (TF-TG) ENSMUSG00000057137
14368	false	-1	TF-TG	ENSMUSG00000026398 (TF-TG) ENSMUSG00000035683
10271	false	-1	TF-TG	ENSMUSG00000036036 (TF-TG) ENSMUSG00000026398
14366	false	-1	TF-TG	ENSMUSG00000026398 (TF-TG) ENSMUSG00000035849
20508	false	-1	TF-TG	ENSMUSG00000022346 (TF-TG) ENSMUSG00000023066
6169	false	-1	TF-TG	ENSMUSG00000032035 (TF-TG) ENSMUSG00000057897
14360	false	-1	TF-TG	ENSMUSG00000026398 (TF-TG) ENSMUSG00000036887
10264	false	-1	TF-TG	ENSMUSG00000036036 (TF-TG) ENSMUSG00000026483
20503	false	-1	TF-TG	ENSMUSG00000022346 (TF-TG) ENSMUSG00000023247
6167	false	-1	TF-TG	ENSMUSG00000032035 (TF-TG) ENSMUSG00000058006
20502	false	-1	TF-TG	ENSMUSG00000022346 (TF-TG) ENSMUSG00000023272
6166	false	-1	TF-TG	ENSMUSG00000032035 (TF-TG) ENSMUSG00000058070
14356	false	-1	TF-TG	ENSMUSG00000026398 (TF-TG) ENSMUSG00000037580
10258	false	-1	TF-TG	ENSMUSG00000036036 (TF-TG) ENSMUSG00000026669
20497	false	-1	TF-TG	ENSMUSG00000022346 (TF-TG) ENSMUSG00000023886
14353	false	-1	TF-TG	ENSMUSG00000026398 (TF-TG) ENSMUSG00000037643
10257	false	-1	TF-TG	ENSMUSG00000036036 (TF-TG) ENSMUSG00000026683
14350	false	-1	TF-TG	ENSMUSG00000026398 (TF-TG) ENSMUSG00000038903
14348	false	-1	TF-TG	ENSMUSG00000026398 (TF-TG) ENSMUSG00000039115
14347	false	-1	TF-TG	ENSMUSG00000026398 (TF-TG) ENSMUSG00000039234
14346	false	-1	TF-TG	ENSMUSG00000026398 (TF-TG) ENSMUSG00000039323
8202	false	-1	TF-TG	ENSMUSG00000030353 (TF-TG) ENSMUSG00000000125
14345	false	-1	TF-TG	ENSMUSG00000026398 (TF-TG) ENSMUSG00000039395
6153	false	-1	TF-TG	ENSMUSG00000032035 (TF-TG) ENSMUSG00000059493
14344	false	-1	TF-TG	ENSMUSG00000026398 (TF-TG) ENSMUSG00000039831
8199	false	-1	TF-TG	ENSMUSG00000030353 (TF-TG) ENSMUSG00000000214
6151	false	-1	TF-TG	ENSMUSG00000032035 (TF-TG) ENSMUSG00000059713
8198	false	-1	TF-TG	ENSMUSG00000030353 (TF-TG) ENSMUSG00000000253
14341	false	-1	TF-TG	ENSMUSG00000026398 (TF-TG) ENSMUSG00000040433
6149	false	-1	TF-TG	ENSMUSG00000032035 (TF-TG) ENSMUSG00000059939
6148	false	-1	TF-TG	ENSMUSG00000032035 (TF-TG) ENSMUSG00000059991
8195	false	-1	TF-TG	ENSMUSG00000030353 (TF-TG) ENSMUSG00000000555
10243	false	-1	TF-TG	ENSMUSG00000036036 (TF-TG) ENSMUSG00000027075
20482	false	-1	TF-TG	ENSMUSG00000022346 (TF-TG) ENSMUSG00000024175
8193	false	-1	TF-TG	ENSMUSG00000030353 (TF-TG) ENSMUSG00000000594
10241	false	-1	TF-TG	ENSMUSG00000036036 (TF-TG) ENSMUSG00000027230
20480	false	-1	TF-TG	ENSMUSG00000022346 (TF-TG) ENSMUSG00000024193
6143	false	-1	TF-TG	ENSMUSG00000032035 (TF-TG) ENSMUSG00000060550
10239	false	-1	TF-TG	ENSMUSG00000036036 (TF-TG) ENSMUSG00000027273
14333	false	-1	TF-TG	ENSMUSG00000026398 (TF-TG) ENSMUSG00000041268
8189	false	-1	TF-TG	ENSMUSG00000030353 (TF-TG) ENSMUSG00000001525
6141	false	-1	TF-TG	ENSMUSG00000032035 (TF-TG) ENSMUSG00000060671
20476	false	-1	TF-TG	ENSMUSG00000022346 (TF-TG) ENSMUSG00000024299
14332	false	-1	TF-TG	ENSMUSG00000026398 (TF-TG) ENSMUSG00000041351
8188	false	-1	TF-TG	ENSMUSG00000030353 (TF-TG) ENSMUSG00000001761
8184	false	-1	TF-TG	ENSMUSG00000030353 (TF-TG) ENSMUSG00000001985
20471	false	-1	TF-TG	ENSMUSG00000022346 (TF-TG) ENSMUSG00000024366
6134	false	-1	TF-TG	ENSMUSG00000032035 (TF-TG) ENSMUSG00000061607
10230	false	-1	TF-TG	ENSMUSG00000036036 (TF-TG) ENSMUSG00000027533
8181	false	-1	TF-TG	ENSMUSG00000030353 (TF-TG) ENSMUSG00000002835
20468	false	-1	TF-TG	ENSMUSG00000022346 (TF-TG) ENSMUSG00000024423
8180	false	-1	TF-TG	ENSMUSG00000030353 (TF-TG) ENSMUSG00000002870
14322	false	-1	TF-TG	ENSMUSG00000026398 (TF-TG) ENSMUSG00000044005
10226	false	-1	TF-TG	ENSMUSG00000036036 (TF-TG) ENSMUSG00000027611
20464	false	-1	TF-TG	ENSMUSG00000022346 (TF-TG) ENSMUSG00000024512
20463	false	-1	TF-TG	ENSMUSG00000022346 (TF-TG) ENSMUSG00000024516
14319	false	-1	TF-TG	ENSMUSG00000026398 (TF-TG) ENSMUSG00000044646
6127	false	-1	TF-TG	ENSMUSG00000032035 (TF-TG) ENSMUSG00000062210
10223	false	-1	TF-TG	ENSMUSG00000036036 (TF-TG) ENSMUSG00000027661
8174	false	-1	TF-TG	ENSMUSG00000030353 (TF-TG) ENSMUSG00000003283
6126	false	-1	TF-TG	ENSMUSG00000032035 (TF-TG) ENSMUSG00000062248
20461	false	-1	TF-TG	ENSMUSG00000022346 (TF-TG) ENSMUSG00000024533
8173	false	-1	TF-TG	ENSMUSG00000030353 (TF-TG) ENSMUSG00000003355
8172	false	-1	TF-TG	ENSMUSG00000030353 (TF-TG) ENSMUSG00000003411
10220	false	-1	TF-TG	ENSMUSG00000036036 (TF-TG) ENSMUSG00000027797
8171	false	-1	TF-TG	ENSMUSG00000030353 (TF-TG) ENSMUSG00000003436
8170	false	-1	TF-TG	ENSMUSG00000030353 (TF-TG) ENSMUSG00000003469
14313	false	-1	TF-TG	ENSMUSG00000026398 (TF-TG) ENSMUSG00000046223
8168	false	-1	TF-TG	ENSMUSG00000030353 (TF-TG) ENSMUSG00000003545
6120	false	-1	TF-TG	ENSMUSG00000032035 (TF-TG) ENSMUSG00000062760
8167	false	-1	TF-TG	ENSMUSG00000030353 (TF-TG) ENSMUSG00000003992
20453	false	-1	TF-TG	ENSMUSG00000022346 (TF-TG) ENSMUSG00000024613
8163	false	-1	TF-TG	ENSMUSG00000030353 (TF-TG) ENSMUSG00000004709
14306	false	-1	TF-TG	ENSMUSG00000026398 (TF-TG) ENSMUSG00000047109
8162	false	-1	TF-TG	ENSMUSG00000030353 (TF-TG) ENSMUSG00000004951
6114	false	-1	TF-TG	ENSMUSG00000032035 (TF-TG) ENSMUSG00000063810
6113	false	-1	TF-TG	ENSMUSG00000032035 (TF-TG) ENSMUSG00000064090
10209	false	-1	TF-TG	ENSMUSG00000036036 (TF-TG) ENSMUSG00000028403
10208	false	-1	TF-TG	ENSMUSG00000036036 (TF-TG) ENSMUSG00000028415
20447	false	-1	TF-TG	ENSMUSG00000022346 (TF-TG) ENSMUSG00000024777
10206	false	-1	TF-TG	ENSMUSG00000036036 (TF-TG) ENSMUSG00000028532
14301	false	-1	TF-TG	ENSMUSG00000026398 (TF-TG) ENSMUSG00000049154
14298	false	-1	TF-TG	ENSMUSG00000026398 (TF-TG) ENSMUSG00000050335
8154	false	-1	TF-TG	ENSMUSG00000030353 (TF-TG) ENSMUSG00000006386
10202	false	-1	TF-TG	ENSMUSG00000036036 (TF-TG) ENSMUSG00000028634
20441	false	-1	TF-TG	ENSMUSG00000022346 (TF-TG) ENSMUSG00000024891
6104	false	-1	TF-TG	ENSMUSG00000032035 (TF-TG) ENSMUSG00000064267
10200	false	-1	TF-TG	ENSMUSG00000036036 (TF-TG) ENSMUSG00000028693
14295	false	-1	TF-TG	ENSMUSG00000026398 (TF-TG) ENSMUSG00000052117
10199	false	-1	TF-TG	ENSMUSG00000036036 (TF-TG) ENSMUSG00000028699
20437	false	-1	TF-TG	ENSMUSG00000022346 (TF-TG) ENSMUSG00000024912
6101	false	-1	TF-TG	ENSMUSG00000032035 (TF-TG) ENSMUSG00000065952
10196	false	-1	TF-TG	ENSMUSG00000036036 (TF-TG) ENSMUSG00000028763
8147	false	-1	TF-TG	ENSMUSG00000030353 (TF-TG) ENSMUSG00000007989
14290	false	-1	TF-TG	ENSMUSG00000026398 (TF-TG) ENSMUSG00000053963
20433	false	-1	TF-TG	ENSMUSG00000022346 (TF-TG) ENSMUSG00000024989
10193	false	-1	TF-TG	ENSMUSG00000036036 (TF-TG) ENSMUSG00000028825
20432	false	-1	TF-TG	ENSMUSG00000022346 (TF-TG) ENSMUSG00000025001
14288	false	-1	TF-TG	ENSMUSG00000026398 (TF-TG) ENSMUSG00000054630
8144	false	-1	TF-TG	ENSMUSG00000030353 (TF-TG) ENSMUSG00000009108
8143	false	-1	TF-TG	ENSMUSG00000030353 (TF-TG) ENSMUSG00000010021
14286	false	-1	TF-TG	ENSMUSG00000026398 (TF-TG) ENSMUSG00000055805
8142	false	-1	TF-TG	ENSMUSG00000030353 (TF-TG) ENSMUSG00000010362
14285	false	-1	TF-TG	ENSMUSG00000026398 (TF-TG) ENSMUSG00000056602
8141	false	-1	TF-TG	ENSMUSG00000030353 (TF-TG) ENSMUSG00000010825
10189	false	-1	TF-TG	ENSMUSG00000036036 (TF-TG) ENSMUSG00000028909
14284	false	-1	TF-TG	ENSMUSG00000026398 (TF-TG) ENSMUSG00000057069
6092	false	-1	TF-TG	ENSMUSG00000032035 (TF-TG) ENSMUSG00000067813
10187	false	-1	TF-TG	ENSMUSG00000036036 (TF-TG) ENSMUSG00000028927
20426	false	-1	TF-TG	ENSMUSG00000022346 (TF-TG) ENSMUSG00000025064
10186	false	-1	TF-TG	ENSMUSG00000036036 (TF-TG) ENSMUSG00000028949
20425	false	-1	TF-TG	ENSMUSG00000022346 (TF-TG) ENSMUSG00000025075
6089	false	-1	TF-TG	ENSMUSG00000032035 (TF-TG) ENSMUSG00000068154
8136	false	-1	TF-TG	ENSMUSG00000030353 (TF-TG) ENSMUSG00000013846
6088	false	-1	TF-TG	ENSMUSG00000032035 (TF-TG) ENSMUSG00000068196
8135	false	-1	TF-TG	ENSMUSG00000030353 (TF-TG) ENSMUSG00000014164
6086	false	-1	TF-TG	ENSMUSG00000032035 (TF-TG) ENSMUSG00000068735
14276	false	-1	TF-TG	ENSMUSG00000026398 (TF-TG) ENSMUSG00000059713
14275	false	-1	TF-TG	ENSMUSG00000026398 (TF-TG) ENSMUSG00000059939
8131	false	-1	TF-TG	ENSMUSG00000030353 (TF-TG) ENSMUSG00000015468
10179	false	-1	TF-TG	ENSMUSG00000036036 (TF-TG) ENSMUSG00000029154
14274	false	-1	TF-TG	ENSMUSG00000026398 (TF-TG) ENSMUSG00000059991
8128	false	-1	TF-TG	ENSMUSG00000030353 (TF-TG) ENSMUSG00000016200
20415	false	-1	TF-TG	ENSMUSG00000022346 (TF-TG) ENSMUSG00000025351
6079	false	-1	TF-TG	ENSMUSG00000032035 (TF-TG) ENSMUSG00000069805
6078	false	-1	TF-TG	ENSMUSG00000032035 (TF-TG) ENSMUSG00000069814
6077	false	-1	TF-TG	ENSMUSG00000032035 (TF-TG) ENSMUSG00000069910
10172	false	-1	TF-TG	ENSMUSG00000036036 (TF-TG) ENSMUSG00000029312
6075	false	-1	TF-TG	ENSMUSG00000032035 (TF-TG) ENSMUSG00000070287
10171	false	-1	TF-TG	ENSMUSG00000036036 (TF-TG) ENSMUSG00000029343
10170	false	-1	TF-TG	ENSMUSG00000036036 (TF-TG) ENSMUSG00000029420
8121	false	-1	TF-TG	ENSMUSG00000030353 (TF-TG) ENSMUSG00000017493
6072	false	-1	TF-TG	ENSMUSG00000032035 (TF-TG) ENSMUSG00000070498
8119	false	-1	TF-TG	ENSMUSG00000030353 (TF-TG) ENSMUSG00000017607
8117	false	-1	TF-TG	ENSMUSG00000030353 (TF-TG) ENSMUSG00000017716
6069	false	-1	TF-TG	ENSMUSG00000032035 (TF-TG) ENSMUSG00000070687
6067	false	-1	TF-TG	ENSMUSG00000032035 (TF-TG) ENSMUSG00000070802
6066	false	-1	TF-TG	ENSMUSG00000032035 (TF-TG) ENSMUSG00000070867
20401	false	-1	TF-TG	ENSMUSG00000022346 (TF-TG) ENSMUSG00000025608
6064	false	-1	TF-TG	ENSMUSG00000032035 (TF-TG) ENSMUSG00000071226
8111	false	-1	TF-TG	ENSMUSG00000030353 (TF-TG) ENSMUSG00000018672
14254	false	-1	TF-TG	ENSMUSG00000026398 (TF-TG) ENSMUSG00000072115
20397	false	-1	TF-TG	ENSMUSG00000022346 (TF-TG) ENSMUSG00000025742
14253	false	-1	TF-TG	ENSMUSG00000026398 (TF-TG) ENSMUSG00000072235
10157	false	-1	TF-TG	ENSMUSG00000036036 (TF-TG) ENSMUSG00000029910
6059	false	-1	TF-TG	ENSMUSG00000032035 (TF-TG) ENSMUSG00000071984
8106	false	-1	TF-TG	ENSMUSG00000030353 (TF-TG) ENSMUSG00000019235
20393	false	-1	TF-TG	ENSMUSG00000022346 (TF-TG) ENSMUSG00000025876
6057	false	-1	TF-TG	ENSMUSG00000032035 (TF-TG) ENSMUSG00000072115
10153	false	-1	TF-TG	ENSMUSG00000036036 (TF-TG) ENSMUSG00000030107
8104	false	-1	TF-TG	ENSMUSG00000030353 (TF-TG) ENSMUSG00000019303
6056	false	-1	TF-TG	ENSMUSG00000032035 (TF-TG) ENSMUSG00000072235
20391	false	-1	TF-TG	ENSMUSG00000022346 (TF-TG) ENSMUSG00000025938
10151	false	-1	TF-TG	ENSMUSG00000036036 (TF-TG) ENSMUSG00000030137
20390	false	-1	TF-TG	ENSMUSG00000022346 (TF-TG) ENSMUSG00000025969
14246	false	-1	TF-TG	ENSMUSG00000026398 (TF-TG) ENSMUSG00000079038
10150	false	-1	TF-TG	ENSMUSG00000036036 (TF-TG) ENSMUSG00000030199
14244	false	-1	TF-TG	ENSMUSG00000026398 (TF-TG) ENSMUSG00000089789
8100	false	-1	TF-TG	ENSMUSG00000030353 (TF-TG) ENSMUSG00000019775
10147	false	-1	TF-TG	ENSMUSG00000036036 (TF-TG) ENSMUSG00000030287
8098	false	-1	TF-TG	ENSMUSG00000030353 (TF-TG) ENSMUSG00000019945
6050	false	-1	TF-TG	ENSMUSG00000032035 (TF-TG) ENSMUSG00000072849
10146	false	-1	TF-TG	ENSMUSG00000036036 (TF-TG) ENSMUSG00000030329
8096	false	-1	TF-TG	ENSMUSG00000030353 (TF-TG) ENSMUSG00000019992
10144	false	-1	TF-TG	ENSMUSG00000036036 (TF-TG) ENSMUSG00000030353
6047	false	-1	TF-TG	ENSMUSG00000032035 (TF-TG) ENSMUSG00000073409
20379	false	-1	TF-TG	ENSMUSG00000022346 (TF-TG) ENSMUSG00000026303
6041	false	-1	TF-TG	ENSMUSG00000032035 (TF-TG) ENSMUSG00000074183
8088	false	-1	TF-TG	ENSMUSG00000030353 (TF-TG) ENSMUSG00000020226
20374	false	-1	TF-TG	ENSMUSG00000022346 (TF-TG) ENSMUSG00000026355
20372	false	-1	TF-TG	ENSMUSG00000022346 (TF-TG) ENSMUSG00000026380
6036	false	-1	TF-TG	ENSMUSG00000032035 (TF-TG) ENSMUSG00000074651
20371	false	-1	TF-TG	ENSMUSG00000022346 (TF-TG) ENSMUSG00000026398
8083	false	-1	TF-TG	ENSMUSG00000030353 (TF-TG) ENSMUSG00000020471
6035	false	-1	TF-TG	ENSMUSG00000032035 (TF-TG) ENSMUSG00000074652
6033	false	-1	TF-TG	ENSMUSG00000032035 (TF-TG) ENSMUSG00000074802
8080	false	-1	TF-TG	ENSMUSG00000030353 (TF-TG) ENSMUSG00000020649
6031	false	-1	TF-TG	ENSMUSG00000032035 (TF-TG) ENSMUSG00000074892
6030	false	-1	TF-TG	ENSMUSG00000032035 (TF-TG) ENSMUSG00000074896
10126	false	-1	TF-TG	ENSMUSG00000036036 (TF-TG) ENSMUSG00000031629
6029	false	-1	TF-TG	ENSMUSG00000032035 (TF-TG) ENSMUSG00000075012
10125	false	-1	TF-TG	ENSMUSG00000036036 (TF-TG) ENSMUSG00000031668
10124	false	-1	TF-TG	ENSMUSG00000036036 (TF-TG) ENSMUSG00000031730
20363	false	-1	TF-TG	ENSMUSG00000022346 (TF-TG) ENSMUSG00000026483
8075	false	-1	TF-TG	ENSMUSG00000030353 (TF-TG) ENSMUSG00000020788
10123	false	-1	TF-TG	ENSMUSG00000036036 (TF-TG) ENSMUSG00000031757
20362	false	-1	TF-TG	ENSMUSG00000022346 (TF-TG) ENSMUSG00000026504
10122	false	-1	TF-TG	ENSMUSG00000036036 (TF-TG) ENSMUSG00000031760
8073	false	-1	TF-TG	ENSMUSG00000030353 (TF-TG) ENSMUSG00000020846
10120	false	-1	TF-TG	ENSMUSG00000036036 (TF-TG) ENSMUSG00000031788
10119	false	-1	TF-TG	ENSMUSG00000036036 (TF-TG) ENSMUSG00000031790
20358	false	-1	TF-TG	ENSMUSG00000022346 (TF-TG) ENSMUSG00000026546
8070	false	-1	TF-TG	ENSMUSG00000030353 (TF-TG) ENSMUSG00000020900
10118	false	-1	TF-TG	ENSMUSG00000036036 (TF-TG) ENSMUSG00000031791
8069	false	-1	TF-TG	ENSMUSG00000030353 (TF-TG) ENSMUSG00000020901
10117	false	-1	TF-TG	ENSMUSG00000036036 (TF-TG) ENSMUSG00000031844
6019	false	-1	TF-TG	ENSMUSG00000032035 (TF-TG) ENSMUSG00000078349
20353	false	-1	TF-TG	ENSMUSG00000022346 (TF-TG) ENSMUSG00000026646
6016	false	-1	TF-TG	ENSMUSG00000032035 (TF-TG) ENSMUSG00000078773
20351	false	-1	TF-TG	ENSMUSG00000022346 (TF-TG) ENSMUSG00000026669
6015	false	-1	TF-TG	ENSMUSG00000032035 (TF-TG) ENSMUSG00000078949
10111	false	-1	TF-TG	ENSMUSG00000036036 (TF-TG) ENSMUSG00000031981
20350	false	-1	TF-TG	ENSMUSG00000022346 (TF-TG) ENSMUSG00000026683
20348	false	-1	TF-TG	ENSMUSG00000022346 (TF-TG) ENSMUSG00000026700
6011	false	-1	TF-TG	ENSMUSG00000032035 (TF-TG) ENSMUSG00000079038
10107	false	-1	TF-TG	ENSMUSG00000036036 (TF-TG) ENSMUSG00000032092
10104	false	-1	TF-TG	ENSMUSG00000036036 (TF-TG) ENSMUSG00000032232
6003	false	-1	TF-TG	ENSMUSG00000032035 (TF-TG) ENSMUSG00000079685
20336	false	-1	TF-TG	ENSMUSG00000022346 (TF-TG) ENSMUSG00000026833
8048	false	-1	TF-TG	ENSMUSG00000030353 (TF-TG) ENSMUSG00000021838
6000	false	-1	TF-TG	ENSMUSG00000032035 (TF-TG) ENSMUSG00000089789
10096	false	-1	TF-TG	ENSMUSG00000036036 (TF-TG) ENSMUSG00000032350
8047	false	-1	TF-TG	ENSMUSG00000030353 (TF-TG) ENSMUSG00000021846
8046	false	-1	TF-TG	ENSMUSG00000030353 (TF-TG) ENSMUSG00000021876
8045	false	-1	TF-TG	ENSMUSG00000030353 (TF-TG) ENSMUSG00000022003
5996	false	-1	TF-TG	ENSMUSG00000032035 (TF-TG) ENSMUSG00000092486
10090	false	-1	TF-TG	ENSMUSG00000036036 (TF-TG) ENSMUSG00000032531
8041	false	-1	TF-TG	ENSMUSG00000030353 (TF-TG) ENSMUSG00000022148
5993	false	-1	TF-TG	ENSMUSG00000032035 (TF-TG) ENSMUSG00000094928
10089	false	-1	TF-TG	ENSMUSG00000036036 (TF-TG) ENSMUSG00000032532
20328	false	-1	TF-TG	ENSMUSG00000022346 (TF-TG) ENSMUSG00000027006
5991	false	-1	TF-TG	ENSMUSG00000032035 (TF-TG) ENSMUSG00000095567
8038	false	-1	TF-TG	ENSMUSG00000030353 (TF-TG) ENSMUSG00000022253
20324	false	-1	TF-TG	ENSMUSG00000022346 (TF-TG) ENSMUSG00000027075
5987	false	-1	TF-TG	ENSMUSG00000032035 (TF-TG) ENSMUSG00000096847
20322	false	-1	TF-TG	ENSMUSG00000022346 (TF-TG) ENSMUSG00000027230
5986	false	-1	TF-TG	ENSMUSG00000032035 (TF-TG) ENSMUSG00000098557
10082	false	-1	TF-TG	ENSMUSG00000036036 (TF-TG) ENSMUSG00000032773
8033	false	-1	TF-TG	ENSMUSG00000030353 (TF-TG) ENSMUSG00000022489
20319	false	-1	TF-TG	ENSMUSG00000022346 (TF-TG) ENSMUSG00000027273
5981	false	-1	TF-TG	ENSMUSG00000032035 (TF-TG) ENSMUSG00000110206
8028	false	-1	TF-TG	ENSMUSG00000030353 (TF-TG) ENSMUSG00000022769
10076	false	-1	TF-TG	ENSMUSG00000036036 (TF-TG) ENSMUSG00000033032
8027	false	-1	TF-TG	ENSMUSG00000030353 (TF-TG) ENSMUSG00000022773
20312	false	-1	TF-TG	ENSMUSG00000022346 (TF-TG) ENSMUSG00000027420
20311	false	-1	TF-TG	ENSMUSG00000022346 (TF-TG) ENSMUSG00000027435
8023	false	-1	TF-TG	ENSMUSG00000030353 (TF-TG) ENSMUSG00000022912
5975	false	-1	TF-lincRNA	ENSMUSG00000032035 (TF-lincRNA) ENSMUSG00000085183
5974	false	-1	TF-lincRNA	ENSMUSG00000032035 (TF-lincRNA) ENSMUSG00000103043
10070	false	-1	TF-TG	ENSMUSG00000036036 (TF-TG) ENSMUSG00000033307
8021	false	-1	TF-TG	ENSMUSG00000030353 (TF-TG) ENSMUSG00000022945
5972	false	-1	TF-lincRNA	ENSMUSG00000032035 (TF-lincRNA) ENSMUSG00000097561
10066	false	-1	TF-TG	ENSMUSG00000036036 (TF-TG) ENSMUSG00000033825
20304	false	-1	TF-TG	ENSMUSG00000022346 (TF-TG) ENSMUSG00000027533
5966	false	-1	TF-lincRNA	ENSMUSG00000032035 (TF-lincRNA) ENSMUSG00000097932
5965	false	-1	TF-lincRNA	ENSMUSG00000032035 (TF-lincRNA) ENSMUSG00000099552
10061	false	-1	TF-TG	ENSMUSG00000036036 (TF-TG) ENSMUSG00000034118
20300	false	-1	TF-TG	ENSMUSG00000022346 (TF-TG) ENSMUSG00000027611
8012	false	-1	TF-TG	ENSMUSG00000030353 (TF-TG) ENSMUSG00000023886
5964	false	-1	TF-lincRNA	ENSMUSG00000032035 (TF-lincRNA) ENSMUSG00000097284
20298	false	-1	TF-TG	ENSMUSG00000022346 (TF-TG) ENSMUSG00000027635
10058	false	-1	TF-TG	ENSMUSG00000036036 (TF-TG) ENSMUSG00000034265
20295	false	-1	TF-TG	ENSMUSG00000022346 (TF-TG) ENSMUSG00000027661
10053	false	-1	TF-TG	ENSMUSG00000036036 (TF-TG) ENSMUSG00000034579
8003	false	-1	TF-TG	ENSMUSG00000030353 (TF-TG) ENSMUSG00000024193
5955	false	-1	TF-lincRNA	ENSMUSG00000032035 (TF-lincRNA) ENSMUSG00000097632
10051	false	-1	TF-TG	ENSMUSG00000036036 (TF-TG) ENSMUSG00000034656
8001	false	-1	TF-TG	ENSMUSG00000030353 (TF-TG) ENSMUSG00000024299
10048	false	-1	TF-TG	ENSMUSG00000036036 (TF-TG) ENSMUSG00000034768
20287	false	-1	TF-TG	ENSMUSG00000022346 (TF-TG) ENSMUSG00000027797
5951	false	-1	TF-miRNA	ENSMUSG00000032035 (TF-miRNA) mmu-miR-1945
20285	false	-1	TF-TG	ENSMUSG00000022346 (TF-TG) ENSMUSG00000027834
7996	false	-1	TF-TG	ENSMUSG00000030353 (TF-TG) ENSMUSG00000024366
7995	false	-1	TF-TG	ENSMUSG00000030353 (TF-TG) ENSMUSG00000024512
20281	false	-1	TF-TG	ENSMUSG00000022346 (TF-TG) ENSMUSG00000027931
7993	false	-1	TF-TG	ENSMUSG00000030353 (TF-TG) ENSMUSG00000024533
10040	false	-1	TF-TG	ENSMUSG00000036036 (TF-TG) ENSMUSG00000035273
10038	false	-1	TF-TG	ENSMUSG00000036036 (TF-TG) ENSMUSG00000035357
20277	false	-1	TF-TG	ENSMUSG00000022346 (TF-TG) ENSMUSG00000028039
7986	false	-1	TF-TG	ENSMUSG00000030353 (TF-TG) ENSMUSG00000024613
10031	false	-1	TF-TG	ENSMUSG00000036036 (TF-TG) ENSMUSG00000035683
7980	false	-1	TF-TG	ENSMUSG00000030353 (TF-TG) ENSMUSG00000024891
20266	false	-1	TF-TG	ENSMUSG00000022346 (TF-TG) ENSMUSG00000028282
7977	false	-1	TF-TG	ENSMUSG00000030353 (TF-TG) ENSMUSG00000024912
10025	false	-1	TF-TG	ENSMUSG00000036036 (TF-TG) ENSMUSG00000036256
20264	false	-1	TF-TG	ENSMUSG00000022346 (TF-TG) ENSMUSG00000028312
20262	false	-1	TF-TG	ENSMUSG00000022346 (TF-TG) ENSMUSG00000028356
7974	false	-1	TF-TG	ENSMUSG00000030353 (TF-TG) ENSMUSG00000025064
20259	false	-1	TF-TG	ENSMUSG00000022346 (TF-TG) ENSMUSG00000028403
20258	false	-1	TF-TG	ENSMUSG00000022346 (TF-TG) ENSMUSG00000028415
10018	false	-1	TF-TG	ENSMUSG00000036036 (TF-TG) ENSMUSG00000036745
7969	false	-1	TF-TG	ENSMUSG00000030353 (TF-TG) ENSMUSG00000025351
10017	false	-1	TF-TG	ENSMUSG00000036036 (TF-TG) ENSMUSG00000036777
10016	false	-1	TF-TG	ENSMUSG00000036036 (TF-TG) ENSMUSG00000036863
10014	false	-1	TF-TG	ENSMUSG00000036036 (TF-TG) ENSMUSG00000036887
20252	false	-1	TF-TG	ENSMUSG00000022346 (TF-TG) ENSMUSG00000028532
7963	false	-1	TF-TG	ENSMUSG00000030353 (TF-TG) ENSMUSG00000025608
7962	false	-1	TF-TG	ENSMUSG00000030353 (TF-TG) ENSMUSG00000025742
20249	false	-1	TF-TG	ENSMUSG00000022346 (TF-TG) ENSMUSG00000028555
10009	false	-1	TF-TG	ENSMUSG00000036036 (TF-TG) ENSMUSG00000037159
7957	false	-1	TF-TG	ENSMUSG00000030353 (TF-TG) ENSMUSG00000025938
20244	false	-1	TF-TG	ENSMUSG00000022346 (TF-TG) ENSMUSG00000028602
7956	false	-1	TF-TG	ENSMUSG00000030353 (TF-TG) ENSMUSG00000025969
10004	false	-1	TF-TG	ENSMUSG00000036036 (TF-TG) ENSMUSG00000037509
20240	false	-1	TF-TG	ENSMUSG00000022346 (TF-TG) ENSMUSG00000028634
7952	false	-1	TF-TG	ENSMUSG00000030353 (TF-TG) ENSMUSG00000026303
20238	false	-1	TF-TG	ENSMUSG00000022346 (TF-TG) ENSMUSG00000028693
20237	false	-1	TF-TG	ENSMUSG00000022346 (TF-TG) ENSMUSG00000028699
9996	false	-1	TF-TG	ENSMUSG00000036036 (TF-TG) ENSMUSG00000037820
20235	false	-1	TF-TG	ENSMUSG00000022346 (TF-TG) ENSMUSG00000028763
20232	false	-1	TF-TG	ENSMUSG00000022346 (TF-TG) ENSMUSG00000028825
7942	false	-1	TF-TG	ENSMUSG00000030353 (TF-TG) ENSMUSG00000026546
9990	false	-1	TF-TG	ENSMUSG00000036036 (TF-TG) ENSMUSG00000038068
7940	false	-1	TF-TG	ENSMUSG00000030353 (TF-TG) ENSMUSG00000026646
7939	false	-1	TF-TG	ENSMUSG00000030353 (TF-TG) ENSMUSG00000026669
20226	false	-1	TF-TG	ENSMUSG00000022346 (TF-TG) ENSMUSG00000028909
7938	false	-1	TF-TG	ENSMUSG00000030353 (TF-TG) ENSMUSG00000026683
9986	false	-1	TF-TG	ENSMUSG00000036036 (TF-TG) ENSMUSG00000038241
7937	false	-1	TF-TG	ENSMUSG00000030353 (TF-TG) ENSMUSG00000026700
20224	false	-1	TF-TG	ENSMUSG00000022346 (TF-TG) ENSMUSG00000028927
9984	false	-1	TF-TG	ENSMUSG00000036036 (TF-TG) ENSMUSG00000038319
20223	false	-1	TF-TG	ENSMUSG00000022346 (TF-TG) ENSMUSG00000028949
9983	false	-1	TF-TG	ENSMUSG00000036036 (TF-TG) ENSMUSG00000038349
20221	false	-1	TF-TG	ENSMUSG00000022346 (TF-TG) ENSMUSG00000028986
9981	false	-1	TF-TG	ENSMUSG00000036036 (TF-TG) ENSMUSG00000038486
7930	false	-1	TF-TG	ENSMUSG00000030353 (TF-TG) ENSMUSG00000026833
20213	false	-1	TF-TG	ENSMUSG00000022346 (TF-TG) ENSMUSG00000029154
9972	false	-1	TF-TG	ENSMUSG00000036036 (TF-TG) ENSMUSG00000038903
9969	false	-1	TF-TG	ENSMUSG00000036036 (TF-TG) ENSMUSG00000039115
7919	false	-1	TF-TG	ENSMUSG00000030353 (TF-TG) ENSMUSG00000027420
9967	false	-1	TF-TG	ENSMUSG00000036036 (TF-TG) ENSMUSG00000039145
20206	false	-1	TF-TG	ENSMUSG00000022346 (TF-TG) ENSMUSG00000029312
7918	false	-1	TF-TG	ENSMUSG00000030353 (TF-TG) ENSMUSG00000027435
20204	false	-1	TF-TG	ENSMUSG00000022346 (TF-TG) ENSMUSG00000029343
20202	false	-1	TF-TG	ENSMUSG00000022346 (TF-TG) ENSMUSG00000029408
7914	false	-1	TF-TG	ENSMUSG00000030353 (TF-TG) ENSMUSG00000027533
9961	false	-1	TF-TG	ENSMUSG00000036036 (TF-TG) ENSMUSG00000039234
20200	false	-1	TF-TG	ENSMUSG00000022346 (TF-TG) ENSMUSG00000029420
7911	false	-1	TF-TG	ENSMUSG00000030353 (TF-TG) ENSMUSG00000027611
9959	false	-1	TF-TG	ENSMUSG00000036036 (TF-TG) ENSMUSG00000039372
7909	false	-1	TF-TG	ENSMUSG00000030353 (TF-TG) ENSMUSG00000027635
7908	false	-1	TF-TG	ENSMUSG00000030353 (TF-TG) ENSMUSG00000027797
7904	false	-1	TF-TG	ENSMUSG00000030353 (TF-TG) ENSMUSG00000028039
7900	false	-1	TF-TG	ENSMUSG00000030353 (TF-TG) ENSMUSG00000028282
9947	false	-1	TF-TG	ENSMUSG00000036036 (TF-TG) ENSMUSG00000040046
7898	false	-1	TF-TG	ENSMUSG00000030353 (TF-TG) ENSMUSG00000028356
7897	false	-1	TF-TG	ENSMUSG00000030353 (TF-TG) ENSMUSG00000028403
7896	false	-1	TF-TG	ENSMUSG00000030353 (TF-TG) ENSMUSG00000028415
9942	false	-1	TF-TG	ENSMUSG00000036036 (TF-TG) ENSMUSG00000040276
7893	false	-1	TF-TG	ENSMUSG00000030353 (TF-TG) ENSMUSG00000028555
9941	false	-1	TF-TG	ENSMUSG00000036036 (TF-TG) ENSMUSG00000040339
9939	false	-1	TF-TG	ENSMUSG00000036036 (TF-TG) ENSMUSG00000040433
7890	false	-1	TF-TG	ENSMUSG00000030353 (TF-TG) ENSMUSG00000028602
20176	false	-1	TF-TG	ENSMUSG00000022346 (TF-TG) ENSMUSG00000029875
20175	false	-1	TF-TG	ENSMUSG00000022346 (TF-TG) ENSMUSG00000029910
7887	false	-1	TF-TG	ENSMUSG00000030353 (TF-TG) ENSMUSG00000028634
7886	false	-1	TF-TG	ENSMUSG00000030353 (TF-TG) ENSMUSG00000028699
7884	false	-1	TF-TG	ENSMUSG00000030353 (TF-TG) ENSMUSG00000028763
20169	false	-1	TF-TG	ENSMUSG00000022346 (TF-TG) ENSMUSG00000030107
7880	false	-1	TF-TG	ENSMUSG00000030353 (TF-TG) ENSMUSG00000028927
20167	false	-1	TF-TG	ENSMUSG00000022346 (TF-TG) ENSMUSG00000030137
20166	false	-1	TF-TG	ENSMUSG00000022346 (TF-TG) ENSMUSG00000030199
20163	false	-1	TF-TG	ENSMUSG00000022346 (TF-TG) ENSMUSG00000030287
20162	false	-1	TF-TG	ENSMUSG00000022346 (TF-TG) ENSMUSG00000030329
7874	false	-1	TF-TG	ENSMUSG00000030353 (TF-TG) ENSMUSG00000029154
9922	false	-1	TF-TG	ENSMUSG00000036036 (TF-TG) ENSMUSG00000041202
9920	false	-1	TF-TG	ENSMUSG00000036036 (TF-TG) ENSMUSG00000041268
20159	false	-1	TF-TG	ENSMUSG00000022346 (TF-TG) ENSMUSG00000030353
9919	false	-1	TF-TG	ENSMUSG00000036036 (TF-TG) ENSMUSG00000041351
9918	false	-1	TF-TG	ENSMUSG00000036036 (TF-TG) ENSMUSG00000041420
7868	false	-1	TF-TG	ENSMUSG00000030353 (TF-TG) ENSMUSG00000029420
20150	false	-1	TF-TG	ENSMUSG00000022346 (TF-TG) ENSMUSG00000030659
9908	false	-1	TF-TG	ENSMUSG00000036036 (TF-TG) ENSMUSG00000041801
7859	false	-1	TF-TG	ENSMUSG00000030353 (TF-TG) ENSMUSG00000029875
20146	false	-1	TF-TG	ENSMUSG00000022346 (TF-TG) ENSMUSG00000030772
7858	false	-1	TF-TG	ENSMUSG00000030353 (TF-TG) ENSMUSG00000029910
7854	false	-1	TF-TG	ENSMUSG00000030353 (TF-TG) ENSMUSG00000030137
7853	false	-1	TF-TG	ENSMUSG00000030353 (TF-TG) ENSMUSG00000030199
7850	false	-1	TF-TG	ENSMUSG00000030353 (TF-TG) ENSMUSG00000030287
9897	false	-1	TF-TG	ENSMUSG00000036036 (TF-TG) ENSMUSG00000042489
7843	false	-1	TF-TG	ENSMUSG00000030353 (TF-TG) ENSMUSG00000030659
9891	false	-1	TF-TG	ENSMUSG00000036036 (TF-TG) ENSMUSG00000042804
9890	false	-1	TF-TG	ENSMUSG00000036036 (TF-TG) ENSMUSG00000042842
7841	false	-1	TF-TG	ENSMUSG00000030353 (TF-TG) ENSMUSG00000030772
9886	false	-1	TF-TG	ENSMUSG00000036036 (TF-TG) ENSMUSG00000043015
7830	false	-1	TF-TG	ENSMUSG00000030353 (TF-TG) ENSMUSG00000031629
7827	false	-1	TF-TG	ENSMUSG00000030353 (TF-TG) ENSMUSG00000031730
20114	false	-1	TF-TG	ENSMUSG00000022346 (TF-TG) ENSMUSG00000031629
7826	false	-1	TF-TG	ENSMUSG00000030353 (TF-TG) ENSMUSG00000031757
9874	false	-1	TF-TG	ENSMUSG00000036036 (TF-TG) ENSMUSG00000044005
20113	false	-1	TF-TG	ENSMUSG00000022346 (TF-TG) ENSMUSG00000031668
7825	false	-1	TF-TG	ENSMUSG00000030353 (TF-TG) ENSMUSG00000031760
7824	false	-1	TF-TG	ENSMUSG00000030353 (TF-TG) ENSMUSG00000031788
20111	false	-1	TF-TG	ENSMUSG00000022346 (TF-TG) ENSMUSG00000031730
7823	false	-1	TF-TG	ENSMUSG00000030353 (TF-TG) ENSMUSG00000031790
7822	false	-1	TF-TG	ENSMUSG00000030353 (TF-TG) ENSMUSG00000031791
20109	false	-1	TF-TG	ENSMUSG00000022346 (TF-TG) ENSMUSG00000031757
7821	false	-1	TF-TG	ENSMUSG00000030353 (TF-TG) ENSMUSG00000031844
20108	false	-1	TF-TG	ENSMUSG00000022346 (TF-TG) ENSMUSG00000031760
20106	false	-1	TF-TG	ENSMUSG00000022346 (TF-TG) ENSMUSG00000031788
9866	false	-1	TF-TG	ENSMUSG00000036036 (TF-TG) ENSMUSG00000044626
20105	false	-1	TF-TG	ENSMUSG00000022346 (TF-TG) ENSMUSG00000031790
9865	false	-1	TF-TG	ENSMUSG00000036036 (TF-TG) ENSMUSG00000044646
20104	false	-1	TF-TG	ENSMUSG00000022346 (TF-TG) ENSMUSG00000031791
20103	false	-1	TF-TG	ENSMUSG00000022346 (TF-TG) ENSMUSG00000031844
7814	false	-1	TF-TG	ENSMUSG00000030353 (TF-TG) ENSMUSG00000032035
9862	false	-1	TF-TG	ENSMUSG00000036036 (TF-TG) ENSMUSG00000045007
7809	false	-1	TF-TG	ENSMUSG00000030353 (TF-TG) ENSMUSG00000032232
20096	false	-1	TF-TG	ENSMUSG00000022346 (TF-TG) ENSMUSG00000031981
9856	false	-1	TF-TG	ENSMUSG00000036036 (TF-TG) ENSMUSG00000045518
9854	false	-1	TF-TG	ENSMUSG00000036036 (TF-TG) ENSMUSG00000045790
7805	false	-1	TF-TG	ENSMUSG00000030353 (TF-TG) ENSMUSG00000032350
20091	false	-1	TF-TG	ENSMUSG00000022346 (TF-TG) ENSMUSG00000032035
20089	false	-1	TF-TG	ENSMUSG00000022346 (TF-TG) ENSMUSG00000032092
9847	false	-1	TF-TG	ENSMUSG00000036036 (TF-TG) ENSMUSG00000046204
7798	false	-1	TF-TG	ENSMUSG00000030353 (TF-TG) ENSMUSG00000032531
9846	false	-1	TF-TG	ENSMUSG00000036036 (TF-TG) ENSMUSG00000046242
20082	false	-1	TF-TG	ENSMUSG00000022346 (TF-TG) ENSMUSG00000032232
7791	false	-1	TF-TG	ENSMUSG00000030353 (TF-TG) ENSMUSG00000032902
9839	false	-1	TF-TG	ENSMUSG00000036036 (TF-TG) ENSMUSG00000046841
9836	false	-1	TF-TG	ENSMUSG00000036036 (TF-TG) ENSMUSG00000047109
7787	false	-1	TF-TG	ENSMUSG00000030353 (TF-TG) ENSMUSG00000033032
9834	false	-1	TF-TG	ENSMUSG00000036036 (TF-TG) ENSMUSG00000047181
9831	false	-1	TF-TG	ENSMUSG00000036036 (TF-TG) ENSMUSG00000047473
20069	false	-1	TF-TG	ENSMUSG00000022346 (TF-TG) ENSMUSG00000032350
9823	false	-1	TF-TG	ENSMUSG00000036036 (TF-TG) ENSMUSG00000047878
7774	false	-1	TF-TG	ENSMUSG00000030353 (TF-TG) ENSMUSG00000033970
9821	false	-1	TF-TG	ENSMUSG00000036036 (TF-TG) ENSMUSG00000047963
20058	false	-1	TF-TG	ENSMUSG00000022346 (TF-TG) ENSMUSG00000032531
20057	false	-1	TF-TG	ENSMUSG00000022346 (TF-TG) ENSMUSG00000032532
7769	false	-1	TF-TG	ENSMUSG00000030353 (TF-TG) ENSMUSG00000034768
7767	false	-1	TF-TG	ENSMUSG00000030353 (TF-TG) ENSMUSG00000034818
9815	false	-1	TF-TG	ENSMUSG00000036036 (TF-TG) ENSMUSG00000048349
7762	false	-1	TF-TG	ENSMUSG00000030353 (TF-TG) ENSMUSG00000035164
20048	false	-1	TF-TG	ENSMUSG00000022346 (TF-TG) ENSMUSG00000032773
9805	false	-1	TF-TG	ENSMUSG00000036036 (TF-TG) ENSMUSG00000049288
20042	false	-1	TF-TG	ENSMUSG00000022346 (TF-TG) ENSMUSG00000032902
7754	false	-1	TF-TG	ENSMUSG00000030353 (TF-TG) ENSMUSG00000035683
9802	false	-1	TF-TG	ENSMUSG00000036036 (TF-TG) ENSMUSG00000049436
20037	false	-1	TF-TG	ENSMUSG00000022346 (TF-TG) ENSMUSG00000033032
7749	false	-1	TF-TG	ENSMUSG00000030353 (TF-TG) ENSMUSG00000036036
7747	false	-1	TF-TG	ENSMUSG00000030353 (TF-TG) ENSMUSG00000036223
7743	false	-1	TF-TG	ENSMUSG00000030353 (TF-TG) ENSMUSG00000036777
20029	false	-1	TF-TG	ENSMUSG00000022346 (TF-TG) ENSMUSG00000033307
7740	false	-1	TF-TG	ENSMUSG00000030353 (TF-TG) ENSMUSG00000036887
7738	false	-1	TF-TG	ENSMUSG00000030353 (TF-TG) ENSMUSG00000036944
9783	false	-1	TF-TG	ENSMUSG00000036036 (TF-TG) ENSMUSG00000050824
7734	false	-1	TF-TG	ENSMUSG00000030353 (TF-TG) ENSMUSG00000037159
20019	false	-1	TF-TG	ENSMUSG00000022346 (TF-TG) ENSMUSG00000033825
7730	false	-1	TF-TG	ENSMUSG00000030353 (TF-TG) ENSMUSG00000037509
9778	false	-1	TF-TG	ENSMUSG00000036036 (TF-TG) ENSMUSG00000051251
9777	false	-1	TF-TG	ENSMUSG00000036036 (TF-TG) ENSMUSG00000051314
9774	false	-1	TF-TG	ENSMUSG00000036036 (TF-TG) ENSMUSG00000051457
20013	false	-1	TF-TG	ENSMUSG00000022346 (TF-TG) ENSMUSG00000033970
7723	false	-1	TF-TG	ENSMUSG00000030353 (TF-TG) ENSMUSG00000037643
20010	false	-1	TF-TG	ENSMUSG00000022346 (TF-TG) ENSMUSG00000034118
9769	false	-1	TF-TG	ENSMUSG00000036036 (TF-TG) ENSMUSG00000052117
20007	false	-1	TF-TG	ENSMUSG00000022346 (TF-TG) ENSMUSG00000034265
7718	false	-1	TF-TG	ENSMUSG00000030353 (TF-TG) ENSMUSG00000037820
9763	false	-1	TF-TG	ENSMUSG00000036036 (TF-TG) ENSMUSG00000052921
20000	false	-1	TF-TG	ENSMUSG00000022346 (TF-TG) ENSMUSG00000034579
7712	false	-1	TF-TG	ENSMUSG00000030353 (TF-TG) ENSMUSG00000038241
7710	false	-1	TF-TG	ENSMUSG00000030353 (TF-TG) ENSMUSG00000038319
19997	false	-1	TF-TG	ENSMUSG00000022346 (TF-TG) ENSMUSG00000034656
7709	false	-1	TF-TG	ENSMUSG00000030353 (TF-TG) ENSMUSG00000038349
9757	false	-1	TF-TG	ENSMUSG00000036036 (TF-TG) ENSMUSG00000053414
19993	false	-1	TF-TG	ENSMUSG00000022346 (TF-TG) ENSMUSG00000034768
7705	false	-1	TF-TG	ENSMUSG00000030353 (TF-TG) ENSMUSG00000038486
9753	false	-1	TF-TG	ENSMUSG00000036036 (TF-TG) ENSMUSG00000053765
9750	false	-1	TF-TG	ENSMUSG00000036036 (TF-TG) ENSMUSG00000053963
19989	false	-1	TF-TG	ENSMUSG00000022346 (TF-TG) ENSMUSG00000034818
7701	false	-1	TF-TG	ENSMUSG00000030353 (TF-TG) ENSMUSG00000038578
9746	false	-1	TF-TG	ENSMUSG00000036036 (TF-TG) ENSMUSG00000054555
9745	false	-1	TF-TG	ENSMUSG00000036036 (TF-TG) ENSMUSG00000054582
7696	false	-1	TF-TG	ENSMUSG00000030353 (TF-TG) ENSMUSG00000038903
19983	false	-1	TF-TG	ENSMUSG00000022346 (TF-TG) ENSMUSG00000035164
19980	false	-1	TF-TG	ENSMUSG00000022346 (TF-TG) ENSMUSG00000035273
19977	false	-1	TF-TG	ENSMUSG00000022346 (TF-TG) ENSMUSG00000035357
7689	false	-1	TF-TG	ENSMUSG00000030353 (TF-TG) ENSMUSG00000039234
7687	false	-1	TF-TG	ENSMUSG00000030353 (TF-TG) ENSMUSG00000039323
9735	false	-1	TF-TG	ENSMUSG00000036036 (TF-TG) ENSMUSG00000055567
7686	false	-1	TF-TG	ENSMUSG00000030353 (TF-TG) ENSMUSG00000039384
7685	false	-1	TF-TG	ENSMUSG00000030353 (TF-TG) ENSMUSG00000039395
9730	false	-1	TF-TG	ENSMUSG00000036036 (TF-TG) ENSMUSG00000055805
7679	false	-1	TF-TG	ENSMUSG00000030353 (TF-TG) ENSMUSG00000039831
19966	false	-1	TF-TG	ENSMUSG00000022346 (TF-TG) ENSMUSG00000035683
7678	false	-1	TF-TG	ENSMUSG00000030353 (TF-TG) ENSMUSG00000040046
7675	false	-1	TF-TG	ENSMUSG00000030353 (TF-TG) ENSMUSG00000040339
9723	false	-1	TF-TG	ENSMUSG00000036036 (TF-TG) ENSMUSG00000056602
7674	false	-1	TF-TG	ENSMUSG00000030353 (TF-TG) ENSMUSG00000040462
19961	false	-1	TF-TG	ENSMUSG00000022346 (TF-TG) ENSMUSG00000035849
9716	false	-1	TF-TG	ENSMUSG00000036036 (TF-TG) ENSMUSG00000057897
9714	false	-1	TF-TG	ENSMUSG00000036036 (TF-TG) ENSMUSG00000058070
19953	false	-1	TF-TG	ENSMUSG00000022346 (TF-TG) ENSMUSG00000036036
7663	false	-1	TF-TG	ENSMUSG00000030353 (TF-TG) ENSMUSG00000041202
19950	false	-1	TF-TG	ENSMUSG00000022346 (TF-TG) ENSMUSG00000036223
7662	false	-1	TF-TG	ENSMUSG00000030353 (TF-TG) ENSMUSG00000041268
19948	false	-1	TF-TG	ENSMUSG00000022346 (TF-TG) ENSMUSG00000036256
7656	false	-1	TF-TG	ENSMUSG00000030353 (TF-TG) ENSMUSG00000041688
7655	false	-1	TF-TG	ENSMUSG00000030353 (TF-TG) ENSMUSG00000041801
9702	false	-1	TF-TG	ENSMUSG00000036036 (TF-TG) ENSMUSG00000059713
9701	false	-1	TF-TG	ENSMUSG00000036036 (TF-TG) ENSMUSG00000059939
19940	false	-1	TF-TG	ENSMUSG00000022346 (TF-TG) ENSMUSG00000036745
9700	false	-1	TF-TG	ENSMUSG00000036036 (TF-TG) ENSMUSG00000059991
19938	false	-1	TF-TG	ENSMUSG00000022346 (TF-TG) ENSMUSG00000036777
19936	false	-1	TF-TG	ENSMUSG00000022346 (TF-TG) ENSMUSG00000036863
9696	false	-1	TF-TG	ENSMUSG00000036036 (TF-TG) ENSMUSG00000060550
19933	false	-1	TF-TG	ENSMUSG00000022346 (TF-TG) ENSMUSG00000036887
7644	false	-1	TF-TG	ENSMUSG00000030353 (TF-TG) ENSMUSG00000042489
19929	false	-1	TF-TG	ENSMUSG00000022346 (TF-TG) ENSMUSG00000036944
9688	false	-1	TF-TG	ENSMUSG00000036036 (TF-TG) ENSMUSG00000062210
9687	false	-1	TF-TG	ENSMUSG00000036036 (TF-TG) ENSMUSG00000062248
7638	false	-1	TF-TG	ENSMUSG00000030353 (TF-TG) ENSMUSG00000042804
7637	false	-1	TF-TG	ENSMUSG00000030353 (TF-TG) ENSMUSG00000042842
9685	false	-1	TF-TG	ENSMUSG00000036036 (TF-TG) ENSMUSG00000062760
7633	false	-1	TF-TG	ENSMUSG00000030353 (TF-TG) ENSMUSG00000043154
9681	false	-1	TF-TG	ENSMUSG00000036036 (TF-TG) ENSMUSG00000063810
19920	false	-1	TF-TG	ENSMUSG00000022346 (TF-TG) ENSMUSG00000037159
9680	false	-1	TF-TG	ENSMUSG00000036036 (TF-TG) ENSMUSG00000064090
7628	false	-1	TF-TG	ENSMUSG00000030353 (TF-TG) ENSMUSG00000044005
9676	false	-1	TF-TG	ENSMUSG00000036036 (TF-TG) ENSMUSG00000064267
9674	false	-1	TF-TG	ENSMUSG00000036036 (TF-TG) ENSMUSG00000065952
19912	false	-1	TF-TG	ENSMUSG00000022346 (TF-TG) ENSMUSG00000037509
19909	false	-1	TF-TG	ENSMUSG00000022346 (TF-TG) ENSMUSG00000037580
7621	false	-1	TF-TG	ENSMUSG00000030353 (TF-TG) ENSMUSG00000044626
9669	false	-1	TF-TG	ENSMUSG00000036036 (TF-TG) ENSMUSG00000067813
7620	false	-1	TF-TG	ENSMUSG00000030353 (TF-TG) ENSMUSG00000044646
9667	false	-1	TF-TG	ENSMUSG00000036036 (TF-TG) ENSMUSG00000068154
9666	false	-1	TF-TG	ENSMUSG00000036036 (TF-TG) ENSMUSG00000068196
19903	false	-1	TF-TG	ENSMUSG00000022346 (TF-TG) ENSMUSG00000037643
9663	false	-1	TF-TG	ENSMUSG00000036036 (TF-TG) ENSMUSG00000068735
7613	false	-1	TF-TG	ENSMUSG00000030353 (TF-TG) ENSMUSG00000045518
9660	false	-1	TF-TG	ENSMUSG00000036036 (TF-TG) ENSMUSG00000069227
7611	false	-1	TF-TG	ENSMUSG00000030353 (TF-TG) ENSMUSG00000045790
19897	false	-1	TF-TG	ENSMUSG00000022346 (TF-TG) ENSMUSG00000037820
9657	false	-1	TF-TG	ENSMUSG00000036036 (TF-TG) ENSMUSG00000069814
9656	false	-1	TF-TG	ENSMUSG00000036036 (TF-TG) ENSMUSG00000069910
7607	false	-1	TF-TG	ENSMUSG00000030353 (TF-TG) ENSMUSG00000046204
9655	false	-1	TF-TG	ENSMUSG00000036036 (TF-TG) ENSMUSG00000070287
7605	false	-1	TF-TG	ENSMUSG00000030353 (TF-TG) ENSMUSG00000046223
7604	false	-1	TF-TG	ENSMUSG00000030353 (TF-TG) ENSMUSG00000046242
7602	false	-1	TF-TG	ENSMUSG00000030353 (TF-TG) ENSMUSG00000046410
9650	false	-1	TF-TG	ENSMUSG00000036036 (TF-TG) ENSMUSG00000070498
19888	false	-1	TF-TG	ENSMUSG00000022346 (TF-TG) ENSMUSG00000038005
9648	false	-1	TF-TG	ENSMUSG00000036036 (TF-TG) ENSMUSG00000070687
9647	false	-1	TF-TG	ENSMUSG00000036036 (TF-TG) ENSMUSG00000070802
19886	false	-1	TF-TG	ENSMUSG00000022346 (TF-TG) ENSMUSG00000038068
9646	false	-1	TF-TG	ENSMUSG00000036036 (TF-TG) ENSMUSG00000070867
9645	false	-1	TF-TG	ENSMUSG00000036036 (TF-TG) ENSMUSG00000071226
7596	false	-1	TF-TG	ENSMUSG00000030353 (TF-TG) ENSMUSG00000046841
19882	false	-1	TF-TG	ENSMUSG00000022346 (TF-TG) ENSMUSG00000038241
7592	false	-1	TF-TG	ENSMUSG00000030353 (TF-TG) ENSMUSG00000047181
9640	false	-1	TF-TG	ENSMUSG00000036036 (TF-TG) ENSMUSG00000071984
7591	false	-1	TF-TG	ENSMUSG00000030353 (TF-TG) ENSMUSG00000047473
9639	false	-1	TF-TG	ENSMUSG00000036036 (TF-TG) ENSMUSG00000072115
19878	false	-1	TF-TG	ENSMUSG00000022346 (TF-TG) ENSMUSG00000038319
9638	false	-1	TF-TG	ENSMUSG00000036036 (TF-TG) ENSMUSG00000072235
19877	false	-1	TF-TG	ENSMUSG00000022346 (TF-TG) ENSMUSG00000038349
7586	false	-1	TF-TG	ENSMUSG00000030353 (TF-TG) ENSMUSG00000047878
9634	false	-1	TF-TG	ENSMUSG00000036036 (TF-TG) ENSMUSG00000072849
7585	false	-1	TF-TG	ENSMUSG00000030353 (TF-TG) ENSMUSG00000047963
9632	false	-1	TF-TG	ENSMUSG00000036036 (TF-TG) ENSMUSG00000073409
19870	false	-1	TF-TG	ENSMUSG00000022346 (TF-TG) ENSMUSG00000038486
9628	false	-1	TF-TG	ENSMUSG00000036036 (TF-TG) ENSMUSG00000074183
7579	false	-1	TF-TG	ENSMUSG00000030353 (TF-TG) ENSMUSG00000048349
19866	false	-1	TF-TG	ENSMUSG00000022346 (TF-TG) ENSMUSG00000038578
13719	false	-1	TF-TG	ENSMUSG00000003545 (TF-TG) ENSMUSG00000010830
9622	false	-1	TF-TG	ENSMUSG00000036036 (TF-TG) ENSMUSG00000074652
13717	false	-1	TF-TG	ENSMUSG00000003545 (TF-TG) ENSMUSG00000014164
7573	false	-1	TF-TG	ENSMUSG00000030353 (TF-TG) ENSMUSG00000048970
7572	false	-1	TF-TG	ENSMUSG00000030353 (TF-TG) ENSMUSG00000049154
13715	false	-1	TF-TG	ENSMUSG00000003545 (TF-TG) ENSMUSG00000014786
9619	false	-1	TF-TG	ENSMUSG00000036036 (TF-TG) ENSMUSG00000074802
7570	false	-1	TF-TG	ENSMUSG00000030353 (TF-TG) ENSMUSG00000049288
9618	false	-1	TF-TG	ENSMUSG00000036036 (TF-TG) ENSMUSG00000074892
9617	false	-1	TF-TG	ENSMUSG00000036036 (TF-TG) ENSMUSG00000075012
19856	false	-1	TF-TG	ENSMUSG00000022346 (TF-TG) ENSMUSG00000038903
13712	false	-1	TF-TG	ENSMUSG00000003545 (TF-TG) ENSMUSG00000019796
7567	false	-1	TF-TG	ENSMUSG00000030353 (TF-TG) ENSMUSG00000049436
19852	false	-1	TF-TG	ENSMUSG00000022346 (TF-TG) ENSMUSG00000039115
19850	false	-1	TF-TG	ENSMUSG00000022346 (TF-TG) ENSMUSG00000039145
13705	false	-1	TF-TG	ENSMUSG00000003545 (TF-TG) ENSMUSG00000021831
13704	false	-1	TF-TG	ENSMUSG00000003545 (TF-TG) ENSMUSG00000021846
9608	false	-1	TF-TG	ENSMUSG00000036036 (TF-TG) ENSMUSG00000078773
7558	false	-1	TF-TG	ENSMUSG00000030353 (TF-TG) ENSMUSG00000050335
9606	false	-1	TF-TG	ENSMUSG00000036036 (TF-TG) ENSMUSG00000078949
13701	false	-1	TF-TG	ENSMUSG00000003545 (TF-TG) ENSMUSG00000022769
19844	false	-1	TF-TG	ENSMUSG00000022346 (TF-TG) ENSMUSG00000039234
7553	false	-1	TF-TG	ENSMUSG00000030353 (TF-TG) ENSMUSG00000050824
9601	false	-1	TF-TG	ENSMUSG00000036036 (TF-TG) ENSMUSG00000079685
19840	false	-1	TF-TG	ENSMUSG00000022346 (TF-TG) ENSMUSG00000039323
13696	false	-1	TF-TG	ENSMUSG00000003545 (TF-TG) ENSMUSG00000024516
9600	false	-1	TF-TG	ENSMUSG00000036036 (TF-TG) ENSMUSG00000081769
19839	false	-1	TF-TG	ENSMUSG00000022346 (TF-TG) ENSMUSG00000039372
19838	false	-1	TF-TG	ENSMUSG00000022346 (TF-TG) ENSMUSG00000039384
7550	false	-1	TF-TG	ENSMUSG00000030353 (TF-TG) ENSMUSG00000051251
19837	false	-1	TF-TG	ENSMUSG00000022346 (TF-TG) ENSMUSG00000039395
13693	false	-1	TF-TG	ENSMUSG00000003545 (TF-TG) ENSMUSG00000025064
9597	false	-1	TF-TG	ENSMUSG00000036036 (TF-TG) ENSMUSG00000089789
7547	false	-1	TF-TG	ENSMUSG00000030353 (TF-TG) ENSMUSG00000051457
9592	false	-1	TF-TG	ENSMUSG00000036036 (TF-TG) ENSMUSG00000092486
7541	false	-1	TF-TG	ENSMUSG00000030353 (TF-TG) ENSMUSG00000052117
13684	false	-1	TF-TG	ENSMUSG00000003545 (TF-TG) ENSMUSG00000027273
9588	false	-1	TF-TG	ENSMUSG00000036036 (TF-TG) ENSMUSG00000096847
9586	false	-1	TF-TG	ENSMUSG00000036036 (TF-TG) ENSMUSG00000110206
19824	false	-1	TF-TG	ENSMUSG00000022346 (TF-TG) ENSMUSG00000039831
9582	false	-1	TF-lincRNA	ENSMUSG00000036036 (TF-lincRNA) ENSMUSG00000103043
13676	false	-1	TF-TG	ENSMUSG00000003545 (TF-TG) ENSMUSG00000031629
7532	false	-1	TF-TG	ENSMUSG00000030353 (TF-TG) ENSMUSG00000053580
13675	false	-1	TF-TG	ENSMUSG00000003545 (TF-TG) ENSMUSG00000031757
9579	false	-1	TF-lincRNA	ENSMUSG00000036036 (TF-lincRNA) ENSMUSG00000097932
19818	false	-1	TF-TG	ENSMUSG00000022346 (TF-TG) ENSMUSG00000040046
13674	false	-1	TF-TG	ENSMUSG00000003545 (TF-TG) ENSMUSG00000031760
9578	false	-1	TF-lincRNA	ENSMUSG00000036036 (TF-lincRNA) ENSMUSG00000099552
13673	false	-1	TF-TG	ENSMUSG00000003545 (TF-TG) ENSMUSG00000031788
7529	false	-1	TF-TG	ENSMUSG00000030353 (TF-TG) ENSMUSG00000053765
13672	false	-1	TF-TG	ENSMUSG00000003545 (TF-TG) ENSMUSG00000031791
9574	false	-1	TF-lincRNA	ENSMUSG00000036036 (TF-lincRNA) ENSMUSG00000097632
7525	false	-1	TF-TG	ENSMUSG00000030353 (TF-TG) ENSMUSG00000054555
13666	false	-1	TF-TG	ENSMUSG00000003545 (TF-TG) ENSMUSG00000033307
19808	false	-1	TF-TG	ENSMUSG00000022346 (TF-TG) ENSMUSG00000040276
19807	false	-1	TF-TG	ENSMUSG00000022346 (TF-TG) ENSMUSG00000040339
13663	false	-1	TF-TG	ENSMUSG00000003545 (TF-TG) ENSMUSG00000034265
13661	false	-1	TF-TG	ENSMUSG00000003545 (TF-TG) ENSMUSG00000034579
7517	false	-1	TF-TG	ENSMUSG00000030353 (TF-TG) ENSMUSG00000055567
19803	false	-1	TF-TG	ENSMUSG00000022346 (TF-TG) ENSMUSG00000040433
19802	false	-1	TF-TG	ENSMUSG00000022346 (TF-TG) ENSMUSG00000040462
7514	false	-1	TF-TG	ENSMUSG00000030353 (TF-TG) ENSMUSG00000055805
13655	false	-1	TF-TG	ENSMUSG00000003545 (TF-TG) ENSMUSG00000035357
7511	false	-1	TF-TG	ENSMUSG00000030353 (TF-TG) ENSMUSG00000056050
7508	false	-1	TF-TG	ENSMUSG00000030353 (TF-TG) ENSMUSG00000056602
13649	false	-1	TF-TG	ENSMUSG00000003545 (TF-TG) ENSMUSG00000037159
7504	false	-1	TF-TG	ENSMUSG00000030353 (TF-TG) ENSMUSG00000057897
19790	false	-1	TF-TG	ENSMUSG00000022346 (TF-TG) ENSMUSG00000040717
13646	false	-1	TF-TG	ENSMUSG00000003545 (TF-TG) ENSMUSG00000037580
7498	false	-1	TF-TG	ENSMUSG00000030353 (TF-TG) ENSMUSG00000059493
7497	false	-1	TF-TG	ENSMUSG00000030353 (TF-TG) ENSMUSG00000059713
7495	false	-1	TF-TG	ENSMUSG00000030353 (TF-TG) ENSMUSG00000059939
7494	false	-1	TF-TG	ENSMUSG00000030353 (TF-TG) ENSMUSG00000059991
13637	false	-1	TF-TG	ENSMUSG00000003545 (TF-TG) ENSMUSG00000039372
7491	false	-1	TF-TG	ENSMUSG00000030353 (TF-TG) ENSMUSG00000060550
7488	false	-1	TF-TG	ENSMUSG00000030353 (TF-TG) ENSMUSG00000061607
19775	false	-1	TF-TG	ENSMUSG00000022346 (TF-TG) ENSMUSG00000041168
19773	false	-1	TF-TG	ENSMUSG00000022346 (TF-TG) ENSMUSG00000041268
13628	false	-1	TF-TG	ENSMUSG00000003545 (TF-TG) ENSMUSG00000042489
7483	false	-1	TF-TG	ENSMUSG00000030353 (TF-TG) ENSMUSG00000062210
7482	false	-1	TF-TG	ENSMUSG00000030353 (TF-TG) ENSMUSG00000062248
19769	false	-1	TF-TG	ENSMUSG00000022346 (TF-TG) ENSMUSG00000041351
7480	false	-1	TF-TG	ENSMUSG00000030353 (TF-TG) ENSMUSG00000062760
19766	false	-1	TF-TG	ENSMUSG00000022346 (TF-TG) ENSMUSG00000041420
13621	false	-1	TF-TG	ENSMUSG00000003545 (TF-TG) ENSMUSG00000046242
13617	false	-1	TF-TG	ENSMUSG00000003545 (TF-TG) ENSMUSG00000048970
13615	false	-1	TF-TG	ENSMUSG00000003545 (TF-TG) ENSMUSG00000050335
7469	false	-1	TF-TG	ENSMUSG00000030353 (TF-TG) ENSMUSG00000065952
19756	false	-1	TF-TG	ENSMUSG00000022346 (TF-TG) ENSMUSG00000041688
13609	false	-1	TF-TG	ENSMUSG00000003545 (TF-TG) ENSMUSG00000053963
7464	false	-1	TF-TG	ENSMUSG00000030353 (TF-TG) ENSMUSG00000067813
19751	false	-1	TF-TG	ENSMUSG00000022346 (TF-TG) ENSMUSG00000041801
13607	false	-1	TF-TG	ENSMUSG00000003545 (TF-TG) ENSMUSG00000055805
7462	false	-1	TF-TG	ENSMUSG00000030353 (TF-TG) ENSMUSG00000068154
13605	false	-1	TF-TG	ENSMUSG00000003545 (TF-TG) ENSMUSG00000056531
7460	false	-1	TF-TG	ENSMUSG00000030353 (TF-TG) ENSMUSG00000068735
7457	false	-1	TF-TG	ENSMUSG00000030353 (TF-TG) ENSMUSG00000069814
13599	false	-1	TF-TG	ENSMUSG00000003545 (TF-TG) ENSMUSG00000059939
7455	false	-1	TF-TG	ENSMUSG00000030353 (TF-TG) ENSMUSG00000070287
13598	false	-1	TF-TG	ENSMUSG00000003545 (TF-TG) ENSMUSG00000059991
13597	false	-1	TF-TG	ENSMUSG00000003545 (TF-TG) ENSMUSG00000061607
13596	false	-1	TF-TG	ENSMUSG00000003545 (TF-TG) ENSMUSG00000062760
13594	false	-1	TF-TG	ENSMUSG00000003545 (TF-TG) ENSMUSG00000064090
7450	false	-1	TF-TG	ENSMUSG00000030353 (TF-TG) ENSMUSG00000070687
7449	false	-1	TF-TG	ENSMUSG00000030353 (TF-TG) ENSMUSG00000070802
13592	false	-1	TF-TG	ENSMUSG00000003545 (TF-TG) ENSMUSG00000067813
7448	false	-1	TF-TG	ENSMUSG00000030353 (TF-TG) ENSMUSG00000070867
13590	false	-1	TF-TG	ENSMUSG00000003545 (TF-TG) ENSMUSG00000070287
7446	false	-1	TF-TG	ENSMUSG00000030353 (TF-TG) ENSMUSG00000071226
19732	false	-1	TF-TG	ENSMUSG00000022346 (TF-TG) ENSMUSG00000042462
13588	false	-1	TF-TG	ENSMUSG00000003545 (TF-TG) ENSMUSG00000070802
19731	false	-1	TF-TG	ENSMUSG00000022346 (TF-TG) ENSMUSG00000042489
7443	false	-1	TF-TG	ENSMUSG00000030353 (TF-TG) ENSMUSG00000071984
7442	false	-1	TF-TG	ENSMUSG00000030353 (TF-TG) ENSMUSG00000072115
7441	false	-1	TF-TG	ENSMUSG00000030353 (TF-TG) ENSMUSG00000072235
13584	false	-1	TF-lincRNA	ENSMUSG00000003545 (TF-lincRNA) ENSMUSG00000099552
7435	false	-1	TF-TG	ENSMUSG00000030353 (TF-TG) ENSMUSG00000073409
19720	false	-1	TF-TG	ENSMUSG00000022346 (TF-TG) ENSMUSG00000042804
19719	false	-1	TF-TG	ENSMUSG00000022346 (TF-TG) ENSMUSG00000042842
7428	false	-1	TF-TG	ENSMUSG00000030353 (TF-TG) ENSMUSG00000074651
7427	false	-1	TF-TG	ENSMUSG00000030353 (TF-TG) ENSMUSG00000074652
19714	false	-1	TF-TG	ENSMUSG00000022346 (TF-TG) ENSMUSG00000043015
7424	false	-1	TF-TG	ENSMUSG00000030353 (TF-TG) ENSMUSG00000074892
7423	false	-1	TF-TG	ENSMUSG00000030353 (TF-TG) ENSMUSG00000075012
19710	false	-1	TF-TG	ENSMUSG00000022346 (TF-TG) ENSMUSG00000043154
7419	false	-1	TF-TG	ENSMUSG00000030353 (TF-TG) ENSMUSG00000078349
7416	false	-1	TF-TG	ENSMUSG00000030353 (TF-TG) ENSMUSG00000078949
19701	false	-1	TF-TG	ENSMUSG00000022346 (TF-TG) ENSMUSG00000044005
7408	false	-1	TF-TG	ENSMUSG00000030353 (TF-TG) ENSMUSG00000079685
7407	false	-1	TF-TG	ENSMUSG00000030353 (TF-TG) ENSMUSG00000089789
7404	false	-1	TF-TG	ENSMUSG00000030353 (TF-TG) ENSMUSG00000094928
7401	false	-1	TF-TG	ENSMUSG00000030353 (TF-TG) ENSMUSG00000096847
7399	false	-1	TF-TG	ENSMUSG00000030353 (TF-TG) ENSMUSG00000098557
19686	false	-1	TF-TG	ENSMUSG00000022346 (TF-TG) ENSMUSG00000044626
7398	false	-1	TF-TG	ENSMUSG00000030353 (TF-TG) ENSMUSG00000110206
19685	false	-1	TF-TG	ENSMUSG00000022346 (TF-TG) ENSMUSG00000044646
7395	false	-1	TF-lincRNA	ENSMUSG00000030353 (TF-lincRNA) ENSMUSG00000085183
19680	false	-1	TF-TG	ENSMUSG00000022346 (TF-TG) ENSMUSG00000045007
7390	false	-1	TF-lincRNA	ENSMUSG00000030353 (TF-lincRNA) ENSMUSG00000097932
7389	false	-1	TF-lincRNA	ENSMUSG00000030353 (TF-lincRNA) ENSMUSG00000097284
7386	false	-1	TF-lincRNA	ENSMUSG00000030353 (TF-lincRNA) ENSMUSG00000097632
7385	false	-1	TF-miRNA	ENSMUSG00000030353 (TF-miRNA) mmu-miR-1945
19670	false	-1	TF-TG	ENSMUSG00000022346 (TF-TG) ENSMUSG00000045518
7382	false	-1	TF-TG	ENSMUSG00000032035 (TF-TG) ENSMUSG00000000125
19668	false	-1	TF-TG	ENSMUSG00000022346 (TF-TG) ENSMUSG00000045751
7379	false	-1	TF-TG	ENSMUSG00000032035 (TF-TG) ENSMUSG00000000214
19666	false	-1	TF-TG	ENSMUSG00000022346 (TF-TG) ENSMUSG00000045790
7378	false	-1	TF-TG	ENSMUSG00000032035 (TF-TG) ENSMUSG00000000253
7373	false	-1	TF-TG	ENSMUSG00000032035 (TF-TG) ENSMUSG00000000555
7372	false	-1	TF-TG	ENSMUSG00000032035 (TF-TG) ENSMUSG00000000594
7370	false	-1	TF-TG	ENSMUSG00000032035 (TF-TG) ENSMUSG00000001025
7369	false	-1	TF-TG	ENSMUSG00000032035 (TF-TG) ENSMUSG00000001120
19656	false	-1	TF-TG	ENSMUSG00000022346 (TF-TG) ENSMUSG00000046204
19654	false	-1	TF-TG	ENSMUSG00000022346 (TF-TG) ENSMUSG00000046223
19653	false	-1	TF-TG	ENSMUSG00000022346 (TF-TG) ENSMUSG00000046242
7363	false	-1	TF-TG	ENSMUSG00000032035 (TF-TG) ENSMUSG00000001525
7362	false	-1	TF-TG	ENSMUSG00000032035 (TF-TG) ENSMUSG00000001761
19649	false	-1	TF-TG	ENSMUSG00000022346 (TF-TG) ENSMUSG00000046410
7360	false	-1	TF-TG	ENSMUSG00000032035 (TF-TG) ENSMUSG00000001985
7359	false	-1	TF-TG	ENSMUSG00000032035 (TF-TG) ENSMUSG00000002055
7356	false	-1	TF-TG	ENSMUSG00000032035 (TF-TG) ENSMUSG00000002565
7354	false	-1	TF-TG	ENSMUSG00000032035 (TF-TG) ENSMUSG00000002835
7353	false	-1	TF-TG	ENSMUSG00000032035 (TF-TG) ENSMUSG00000002870
19637	false	-1	TF-TG	ENSMUSG00000022346 (TF-TG) ENSMUSG00000046841
19634	false	-1	TF-TG	ENSMUSG00000022346 (TF-TG) ENSMUSG00000047109
7346	false	-1	TF-TG	ENSMUSG00000032035 (TF-TG) ENSMUSG00000003283
7345	false	-1	TF-TG	ENSMUSG00000032035 (TF-TG) ENSMUSG00000003355
7344	false	-1	TF-TG	ENSMUSG00000032035 (TF-TG) ENSMUSG00000003411
19631	false	-1	TF-TG	ENSMUSG00000022346 (TF-TG) ENSMUSG00000047181
7342	false	-1	TF-TG	ENSMUSG00000032035 (TF-TG) ENSMUSG00000003436
7341	false	-1	TF-TG	ENSMUSG00000032035 (TF-TG) ENSMUSG00000003469
7339	false	-1	TF-TG	ENSMUSG00000032035 (TF-TG) ENSMUSG00000003545
7337	false	-1	TF-TG	ENSMUSG00000032035 (TF-TG) ENSMUSG00000003992
19623	false	-1	TF-TG	ENSMUSG00000022346 (TF-TG) ENSMUSG00000047473
7332	false	-1	TF-TG	ENSMUSG00000032035 (TF-TG) ENSMUSG00000004709
7331	false	-1	TF-TG	ENSMUSG00000032035 (TF-TG) ENSMUSG00000004951
7329	false	-1	TF-TG	ENSMUSG00000032035 (TF-TG) ENSMUSG00000005267
19613	false	-1	TF-TG	ENSMUSG00000022346 (TF-TG) ENSMUSG00000047878
19611	false	-1	TF-TG	ENSMUSG00000022346 (TF-TG) ENSMUSG00000047963
7320	false	-1	TF-TG	ENSMUSG00000032035 (TF-TG) ENSMUSG00000006386
19601	false	-1	TF-TG	ENSMUSG00000022346 (TF-TG) ENSMUSG00000048349
7305	false	-1	TF-TG	ENSMUSG00000032035 (TF-TG) ENSMUSG00000007989
19588	false	-1	TF-TG	ENSMUSG00000022346 (TF-TG) ENSMUSG00000048970
7300	false	-1	TF-TG	ENSMUSG00000032035 (TF-TG) ENSMUSG00000009292
19586	false	-1	TF-TG	ENSMUSG00000022346 (TF-TG) ENSMUSG00000049154
19585	false	-1	TF-TG	ENSMUSG00000022346 (TF-TG) ENSMUSG00000049288
7296	false	-1	TF-TG	ENSMUSG00000032035 (TF-TG) ENSMUSG00000010021
7295	false	-1	TF-TG	ENSMUSG00000032035 (TF-TG) ENSMUSG00000010362
19581	false	-1	TF-TG	ENSMUSG00000022346 (TF-TG) ENSMUSG00000049436
7293	false	-1	TF-TG	ENSMUSG00000032035 (TF-TG) ENSMUSG00000010825
7292	false	-1	TF-TG	ENSMUSG00000032035 (TF-TG) ENSMUSG00000010830
7287	false	-1	TF-TG	ENSMUSG00000032035 (TF-TG) ENSMUSG00000013523
7286	false	-1	TF-TG	ENSMUSG00000032035 (TF-TG) ENSMUSG00000013698
7285	false	-1	TF-TG	ENSMUSG00000032035 (TF-TG) ENSMUSG00000013846
7283	false	-1	TF-TG	ENSMUSG00000032035 (TF-TG) ENSMUSG00000014164
7281	false	-1	TF-TG	ENSMUSG00000032035 (TF-TG) ENSMUSG00000014786
19567	false	-1	TF-TG	ENSMUSG00000022346 (TF-TG) ENSMUSG00000050335
7277	false	-1	TF-TG	ENSMUSG00000032035 (TF-TG) ENSMUSG00000015468
19555	false	-1	TF-TG	ENSMUSG00000022346 (TF-TG) ENSMUSG00000050824
7266	false	-1	TF-TG	ENSMUSG00000032035 (TF-TG) ENSMUSG00000017493
7265	false	-1	TF-TG	ENSMUSG00000032035 (TF-TG) ENSMUSG00000017499
7263	false	-1	TF-TG	ENSMUSG00000032035 (TF-TG) ENSMUSG00000017607
19547	false	-1	TF-TG	ENSMUSG00000022346 (TF-TG) ENSMUSG00000051251
7259	false	-1	TF-TG	ENSMUSG00000032035 (TF-TG) ENSMUSG00000017716
19546	false	-1	TF-TG	ENSMUSG00000022346 (TF-TG) ENSMUSG00000051314
19543	false	-1	TF-TG	ENSMUSG00000022346 (TF-TG) ENSMUSG00000051457
7250	false	-1	TF-TG	ENSMUSG00000032035 (TF-TG) ENSMUSG00000018672
19535	false	-1	TF-TG	ENSMUSG00000022346 (TF-TG) ENSMUSG00000052117
7242	false	-1	TF-TG	ENSMUSG00000032035 (TF-TG) ENSMUSG00000019235
19528	false	-1	TF-TG	ENSMUSG00000022346 (TF-TG) ENSMUSG00000052384
7240	false	-1	TF-TG	ENSMUSG00000032035 (TF-TG) ENSMUSG00000019303
19525	false	-1	TF-TG	ENSMUSG00000022346 (TF-TG) ENSMUSG00000052921
7236	false	-1	TF-TG	ENSMUSG00000032035 (TF-TG) ENSMUSG00000019796
7230	false	-1	TF-TG	ENSMUSG00000032035 (TF-TG) ENSMUSG00000019945
19514	false	-1	TF-TG	ENSMUSG00000022346 (TF-TG) ENSMUSG00000053414
7226	false	-1	TF-TG	ENSMUSG00000032035 (TF-TG) ENSMUSG00000019992
19512	false	-1	TF-TG	ENSMUSG00000022346 (TF-TG) ENSMUSG00000053580
19508	false	-1	TF-TG	ENSMUSG00000022346 (TF-TG) ENSMUSG00000053765
19505	false	-1	TF-TG	ENSMUSG00000022346 (TF-TG) ENSMUSG00000053963
7217	false	-1	TF-TG	ENSMUSG00000032035 (TF-TG) ENSMUSG00000020151
7211	false	-1	TF-TG	ENSMUSG00000032035 (TF-TG) ENSMUSG00000020226
19498	false	-1	TF-TG	ENSMUSG00000022346 (TF-TG) ENSMUSG00000054555
19497	false	-1	TF-TG	ENSMUSG00000022346 (TF-TG) ENSMUSG00000054582
19495	false	-1	TF-TG	ENSMUSG00000022346 (TF-TG) ENSMUSG00000054630
7201	false	-1	TF-TG	ENSMUSG00000032035 (TF-TG) ENSMUSG00000020462
7199	false	-1	TF-TG	ENSMUSG00000032035 (TF-TG) ENSMUSG00000020471
7194	false	-1	TF-TG	ENSMUSG00000032035 (TF-TG) ENSMUSG00000020649
19481	false	-1	TF-TG	ENSMUSG00000022346 (TF-TG) ENSMUSG00000055567
19475	false	-1	TF-TG	ENSMUSG00000022346 (TF-TG) ENSMUSG00000055805
7185	false	-1	TF-TG	ENSMUSG00000032035 (TF-TG) ENSMUSG00000020788
15376	false	-1	TF-TG	ENSMUSG00000026565 (TF-TG) ENSMUSG00000021281
11280	false	-1	TF-TG	ENSMUSG00000026815 (TF-TG) ENSMUSG00000027544
11275	false	-1	TF-TG	ENSMUSG00000026815 (TF-TG) ENSMUSG00000027654
15369	false	-1	TF-TG	ENSMUSG00000026565 (TF-TG) ENSMUSG00000022136
15367	false	-1	TF-TG	ENSMUSG00000026565 (TF-TG) ENSMUSG00000022177
11270	false	-1	TF-TG	ENSMUSG00000026815 (TF-TG) ENSMUSG00000027878
11269	false	-1	TF-TG	ENSMUSG00000026815 (TF-TG) ENSMUSG00000027890
15364	false	-1	TF-TG	ENSMUSG00000026565 (TF-TG) ENSMUSG00000022360
15363	false	-1	TF-TG	ENSMUSG00000026565 (TF-TG) ENSMUSG00000022385
15362	false	-1	TF-TG	ENSMUSG00000026565 (TF-TG) ENSMUSG00000022436
11266	false	-1	TF-TG	ENSMUSG00000026815 (TF-TG) ENSMUSG00000027994
15361	false	-1	TF-TG	ENSMUSG00000026565 (TF-TG) ENSMUSG00000022519
15359	false	-1	TF-TG	ENSMUSG00000026565 (TF-TG) ENSMUSG00000022748
11263	false	-1	TF-TG	ENSMUSG00000026815 (TF-TG) ENSMUSG00000028076
15356	false	-1	TF-TG	ENSMUSG00000026565 (TF-TG) ENSMUSG00000022900
15352	false	-1	TF-TG	ENSMUSG00000026565 (TF-TG) ENSMUSG00000023004
15351	false	-1	TF-TG	ENSMUSG00000026565 (TF-TG) ENSMUSG00000023008
11255	false	-1	TF-TG	ENSMUSG00000026815 (TF-TG) ENSMUSG00000028341
15350	false	-1	TF-TG	ENSMUSG00000026565 (TF-TG) ENSMUSG00000023009
15348	false	-1	TF-TG	ENSMUSG00000026565 (TF-TG) ENSMUSG00000023032
15344	false	-1	TF-TG	ENSMUSG00000026565 (TF-TG) ENSMUSG00000023940
11246	false	-1	TF-TG	ENSMUSG00000026815 (TF-TG) ENSMUSG00000028560
15341	false	-1	TF-TG	ENSMUSG00000026565 (TF-TG) ENSMUSG00000024063
11244	false	-1	TF-TG	ENSMUSG00000026815 (TF-TG) ENSMUSG00000028614
11242	false	-1	TF-TG	ENSMUSG00000026815 (TF-TG) ENSMUSG00000028633
15337	false	-1	TF-TG	ENSMUSG00000026565 (TF-TG) ENSMUSG00000024301
15333	false	-1	TF-TG	ENSMUSG00000026565 (TF-TG) ENSMUSG00000024525
11236	false	-1	TF-TG	ENSMUSG00000026815 (TF-TG) ENSMUSG00000028718
15331	false	-1	TF-TG	ENSMUSG00000026565 (TF-TG) ENSMUSG00000024542
15330	false	-1	TF-TG	ENSMUSG00000026565 (TF-TG) ENSMUSG00000024575
15329	false	-1	TF-TG	ENSMUSG00000026565 (TF-TG) ENSMUSG00000024644
11231	false	-1	TF-TG	ENSMUSG00000026815 (TF-TG) ENSMUSG00000028832
11230	false	-1	TF-TG	ENSMUSG00000026815 (TF-TG) ENSMUSG00000028874
11229	false	-1	TF-TG	ENSMUSG00000026815 (TF-TG) ENSMUSG00000028884
15321	false	-1	TF-TG	ENSMUSG00000026565 (TF-TG) ENSMUSG00000025154
11224	false	-1	TF-TG	ENSMUSG00000026815 (TF-TG) ENSMUSG00000028972
15318	false	-1	TF-TG	ENSMUSG00000026565 (TF-TG) ENSMUSG00000025584
15317	false	-1	TF-TG	ENSMUSG00000026565 (TF-TG) ENSMUSG00000025758
11221	false	-1	TF-TG	ENSMUSG00000026815 (TF-TG) ENSMUSG00000029096
15314	false	-1	TF-TG	ENSMUSG00000026565 (TF-TG) ENSMUSG00000026102
15313	false	-1	TF-TG	ENSMUSG00000026565 (TF-TG) ENSMUSG00000026255
11217	false	-1	TF-TG	ENSMUSG00000026815 (TF-TG) ENSMUSG00000029163
11216	false	-1	TF-TG	ENSMUSG00000026815 (TF-TG) ENSMUSG00000029166
11215	false	-1	TF-TG	ENSMUSG00000026815 (TF-TG) ENSMUSG00000029177
15310	false	-1	TF-TG	ENSMUSG00000026565 (TF-TG) ENSMUSG00000026360
11214	false	-1	TF-TG	ENSMUSG00000026815 (TF-TG) ENSMUSG00000029185
15309	false	-1	TF-TG	ENSMUSG00000026565 (TF-TG) ENSMUSG00000026429
15306	false	-1	TF-TG	ENSMUSG00000026565 (TF-TG) ENSMUSG00000026605
11208	false	-1	TF-TG	ENSMUSG00000026815 (TF-TG) ENSMUSG00000029436
11207	false	-1	TF-TG	ENSMUSG00000026815 (TF-TG) ENSMUSG00000029470
15302	false	-1	TF-TG	ENSMUSG00000026565 (TF-TG) ENSMUSG00000026785
11206	false	-1	TF-TG	ENSMUSG00000026815 (TF-TG) ENSMUSG00000029516
15301	false	-1	TF-TG	ENSMUSG00000026565 (TF-TG) ENSMUSG00000026864
15300	false	-1	TF-TG	ENSMUSG00000026565 (TF-TG) ENSMUSG00000026879
15299	false	-1	TF-TG	ENSMUSG00000026565 (TF-TG) ENSMUSG00000026921
11203	false	-1	TF-TG	ENSMUSG00000026815 (TF-TG) ENSMUSG00000029650
15298	false	-1	TF-TG	ENSMUSG00000026565 (TF-TG) ENSMUSG00000026930
15297	false	-1	TF-TG	ENSMUSG00000026565 (TF-TG) ENSMUSG00000026955
11200	false	-1	TF-TG	ENSMUSG00000026815 (TF-TG) ENSMUSG00000029847
15294	false	-1	TF-TG	ENSMUSG00000026565 (TF-TG) ENSMUSG00000027326
15293	false	-1	TF-TG	ENSMUSG00000026565 (TF-TG) ENSMUSG00000027454
15292	false	-1	TF-TG	ENSMUSG00000026565 (TF-TG) ENSMUSG00000027456
11196	false	-1	TF-TG	ENSMUSG00000026815 (TF-TG) ENSMUSG00000030029
15289	false	-1	TF-TG	ENSMUSG00000026565 (TF-TG) ENSMUSG00000027514
11190	false	-1	TF-TG	ENSMUSG00000026815 (TF-TG) ENSMUSG00000030263
15285	false	-1	TF-TG	ENSMUSG00000026565 (TF-TG) ENSMUSG00000027878
11189	false	-1	TF-TG	ENSMUSG00000026815 (TF-TG) ENSMUSG00000030275
15283	false	-1	TF-TG	ENSMUSG00000026565 (TF-TG) ENSMUSG00000028341
11186	false	-1	TF-TG	ENSMUSG00000026815 (TF-TG) ENSMUSG00000030340
15278	false	-1	TF-TG	ENSMUSG00000026565 (TF-TG) ENSMUSG00000028560
11181	false	-1	TF-TG	ENSMUSG00000026815 (TF-TG) ENSMUSG00000030483
11179	false	-1	TF-TG	ENSMUSG00000026815 (TF-TG) ENSMUSG00000030543
15273	false	-1	TF-TG	ENSMUSG00000026565 (TF-TG) ENSMUSG00000028718
15271	false	-1	TF-TG	ENSMUSG00000026565 (TF-TG) ENSMUSG00000028832
11174	false	-1	TF-TG	ENSMUSG00000026815 (TF-TG) ENSMUSG00000030935
15269	false	-1	TF-TG	ENSMUSG00000026565 (TF-TG) ENSMUSG00000028874
15268	false	-1	TF-TG	ENSMUSG00000026565 (TF-TG) ENSMUSG00000028884
15264	false	-1	TF-TG	ENSMUSG00000026565 (TF-TG) ENSMUSG00000029185
11168	false	-1	TF-TG	ENSMUSG00000026815 (TF-TG) ENSMUSG00000031367
11164	false	-1	TF-TG	ENSMUSG00000026815 (TF-TG) ENSMUSG00000031453
15259	false	-1	TF-TG	ENSMUSG00000026565 (TF-TG) ENSMUSG00000029470
15258	false	-1	TF-TG	ENSMUSG00000026565 (TF-TG) ENSMUSG00000029516
11162	false	-1	TF-TG	ENSMUSG00000026815 (TF-TG) ENSMUSG00000031586
15254	false	-1	TF-TG	ENSMUSG00000026565 (TF-TG) ENSMUSG00000029650
15252	false	-1	TF-TG	ENSMUSG00000026565 (TF-TG) ENSMUSG00000029847
15250	false	-1	TF-TG	ENSMUSG00000026565 (TF-TG) ENSMUSG00000030029
11153	false	-1	TF-TG	ENSMUSG00000026815 (TF-TG) ENSMUSG00000031849
15248	false	-1	TF-TG	ENSMUSG00000026565 (TF-TG) ENSMUSG00000030263
15247	false	-1	TF-TG	ENSMUSG00000026565 (TF-TG) ENSMUSG00000030275
11151	false	-1	TF-TG	ENSMUSG00000026815 (TF-TG) ENSMUSG00000031903
15240	false	-1	TF-TG	ENSMUSG00000026565 (TF-TG) ENSMUSG00000031367
15239	false	-1	TF-TG	ENSMUSG00000026565 (TF-TG) ENSMUSG00000031453
15237	false	-1	TF-TG	ENSMUSG00000026565 (TF-TG) ENSMUSG00000031586
11139	false	-1	TF-TG	ENSMUSG00000026815 (TF-TG) ENSMUSG00000032120
15233	false	-1	TF-TG	ENSMUSG00000026565 (TF-TG) ENSMUSG00000031903
15232	false	-1	TF-TG	ENSMUSG00000026565 (TF-TG) ENSMUSG00000032120
15230	false	-1	TF-TG	ENSMUSG00000026565 (TF-TG) ENSMUSG00000032254
11134	false	-1	TF-TG	ENSMUSG00000026815 (TF-TG) ENSMUSG00000032254
11133	false	-1	TF-TG	ENSMUSG00000026815 (TF-TG) ENSMUSG00000032278
15226	false	-1	TF-TG	ENSMUSG00000026565 (TF-TG) ENSMUSG00000032640
15225	false	-1	TF-TG	ENSMUSG00000026565 (TF-TG) ENSMUSG00000032656
11129	false	-1	TF-TG	ENSMUSG00000026815 (TF-TG) ENSMUSG00000032338
11127	false	-1	TF-TG	ENSMUSG00000026815 (TF-TG) ENSMUSG00000032356
15222	false	-1	TF-TG	ENSMUSG00000026565 (TF-TG) ENSMUSG00000032783
11126	false	-1	TF-TG	ENSMUSG00000026815 (TF-TG) ENSMUSG00000032373
11125	false	-1	TF-TG	ENSMUSG00000026815 (TF-TG) ENSMUSG00000032380
15220	false	-1	TF-TG	ENSMUSG00000026565 (TF-TG) ENSMUSG00000032965
15218	false	-1	TF-TG	ENSMUSG00000026565 (TF-TG) ENSMUSG00000033222
15216	false	-1	TF-TG	ENSMUSG00000026565 (TF-TG) ENSMUSG00000033530
15214	false	-1	TF-TG	ENSMUSG00000026565 (TF-TG) ENSMUSG00000034116
11118	false	-1	TF-TG	ENSMUSG00000026815 (TF-TG) ENSMUSG00000032549
11117	false	-1	TF-TG	ENSMUSG00000026815 (TF-TG) ENSMUSG00000032640
11116	false	-1	TF-TG	ENSMUSG00000026815 (TF-TG) ENSMUSG00000032656
15210	false	-1	TF-TG	ENSMUSG00000026565 (TF-TG) ENSMUSG00000034317
15208	false	-1	TF-TG	ENSMUSG00000026565 (TF-TG) ENSMUSG00000034773
11112	false	-1	TF-TG	ENSMUSG00000026815 (TF-TG) ENSMUSG00000032783
15206	false	-1	TF-TG	ENSMUSG00000026565 (TF-TG) ENSMUSG00000034883
15205	false	-1	TF-TG	ENSMUSG00000026565 (TF-TG) ENSMUSG00000035158
11108	false	-1	TF-TG	ENSMUSG00000026815 (TF-TG) ENSMUSG00000032965
15201	false	-1	TF-TG	ENSMUSG00000026565 (TF-TG) ENSMUSG00000035561
13153	false	-1	TF-TG	ENSMUSG00000027878 (TF-TG) ENSMUSG00000022528
13152	false	-1	TF-TG	ENSMUSG00000027878 (TF-TG) ENSMUSG00000038146
11102	false	-1	TF-TG	ENSMUSG00000026815 (TF-TG) ENSMUSG00000033222
11101	false	-1	TF-TG	ENSMUSG00000026815 (TF-TG) ENSMUSG00000033287
15195	false	-1	TF-TG	ENSMUSG00000026565 (TF-TG) ENSMUSG00000036526
11099	false	-1	TF-TG	ENSMUSG00000026815 (TF-TG) ENSMUSG00000033530
15194	false	-1	TF-TG	ENSMUSG00000026565 (TF-TG) ENSMUSG00000036995
15192	false	-1	TF-TG	ENSMUSG00000026565 (TF-TG) ENSMUSG00000037235
11096	false	-1	TF-TG	ENSMUSG00000026815 (TF-TG) ENSMUSG00000033684
15191	false	-1	TF-TG	ENSMUSG00000026565 (TF-TG) ENSMUSG00000037306
15190	false	-1	TF-TG	ENSMUSG00000026565 (TF-TG) ENSMUSG00000037447
11093	false	-1	TF-TG	ENSMUSG00000026815 (TF-TG) ENSMUSG00000033871
15188	false	-1	TF-TG	ENSMUSG00000026565 (TF-TG) ENSMUSG00000037583
15186	false	-1	TF-TG	ENSMUSG00000026565 (TF-TG) ENSMUSG00000037628
11090	false	-1	TF-TG	ENSMUSG00000026815 (TF-TG) ENSMUSG00000034112
11089	false	-1	TF-TG	ENSMUSG00000026815 (TF-TG) ENSMUSG00000034116
15184	false	-1	TF-TG	ENSMUSG00000026565 (TF-TG) ENSMUSG00000037664
15180	false	-1	TF-TG	ENSMUSG00000026565 (TF-TG) ENSMUSG00000038039
15179	false	-1	TF-TG	ENSMUSG00000026565 (TF-TG) ENSMUSG00000038146
15178	false	-1	TF-TG	ENSMUSG00000026565 (TF-TG) ENSMUSG00000038175
11082	false	-1	TF-TG	ENSMUSG00000026815 (TF-TG) ENSMUSG00000034317
11081	false	-1	TF-TG	ENSMUSG00000026815 (TF-TG) ENSMUSG00000034353
11080	false	-1	TF-TG	ENSMUSG00000026815 (TF-TG) ENSMUSG00000034472
15175	false	-1	TF-TG	ENSMUSG00000026565 (TF-TG) ENSMUSG00000038451
11078	false	-1	TF-TG	ENSMUSG00000026815 (TF-TG) ENSMUSG00000034586
15169	false	-1	TF-TG	ENSMUSG00000026565 (TF-TG) ENSMUSG00000039050
11073	false	-1	TF-TG	ENSMUSG00000026815 (TF-TG) ENSMUSG00000034773
15168	false	-1	TF-TG	ENSMUSG00000026565 (TF-TG) ENSMUSG00000039157
15167	false	-1	TF-TG	ENSMUSG00000026565 (TF-TG) ENSMUSG00000039158
11070	false	-1	TF-TG	ENSMUSG00000026815 (TF-TG) ENSMUSG00000034883
15165	false	-1	TF-TG	ENSMUSG00000026565 (TF-TG) ENSMUSG00000039270
15163	false	-1	TF-TG	ENSMUSG00000026565 (TF-TG) ENSMUSG00000039621
15162	false	-1	TF-TG	ENSMUSG00000026565 (TF-TG) ENSMUSG00000039814
15161	false	-1	TF-TG	ENSMUSG00000026565 (TF-TG) ENSMUSG00000039943
15160	false	-1	TF-TG	ENSMUSG00000026565 (TF-TG) ENSMUSG00000039982
9014	false	-1	TF-TG	ENSMUSG00000038146 (TF-TG) ENSMUSG00000022528
11062	false	-1	TF-TG	ENSMUSG00000026815 (TF-TG) ENSMUSG00000035486
9012	false	-1	TF-TG	ENSMUSG00000038146 (TF-TG) ENSMUSG00000078202
11060	false	-1	TF-TG	ENSMUSG00000026815 (TF-TG) ENSMUSG00000035561
15151	false	-1	TF-TG	ENSMUSG00000026565 (TF-TG) ENSMUSG00000040710
11055	false	-1	TF-TG	ENSMUSG00000026815 (TF-TG) ENSMUSG00000035901
15149	false	-1	TF-TG	ENSMUSG00000026565 (TF-TG) ENSMUSG00000040860
15148	false	-1	TF-TG	ENSMUSG00000026565 (TF-TG) ENSMUSG00000040918
15147	false	-1	TF-TG	ENSMUSG00000026565 (TF-TG) ENSMUSG00000041064
11048	false	-1	TF-TG	ENSMUSG00000026815 (TF-TG) ENSMUSG00000036526
15143	false	-1	TF-TG	ENSMUSG00000026565 (TF-TG) ENSMUSG00000041431
15141	false	-1	TF-TG	ENSMUSG00000026565 (TF-TG) ENSMUSG00000041498
11039	false	-1	TF-TG	ENSMUSG00000026815 (TF-TG) ENSMUSG00000036913
15132	false	-1	TF-TG	ENSMUSG00000026565 (TF-TG) ENSMUSG00000043004
11036	false	-1	TF-TG	ENSMUSG00000026815 (TF-TG) ENSMUSG00000036995
15129	false	-1	TF-TG	ENSMUSG00000026565 (TF-TG) ENSMUSG00000043953
11031	false	-1	TF-TG	ENSMUSG00000026815 (TF-TG) ENSMUSG00000037235
11029	false	-1	TF-TG	ENSMUSG00000026815 (TF-TG) ENSMUSG00000037306
11027	false	-1	TF-TG	ENSMUSG00000026815 (TF-TG) ENSMUSG00000037447
11025	false	-1	TF-TG	ENSMUSG00000026815 (TF-TG) ENSMUSG00000037579
11023	false	-1	TF-TG	ENSMUSG00000026815 (TF-TG) ENSMUSG00000037583
15117	false	-1	TF-TG	ENSMUSG00000026565 (TF-TG) ENSMUSG00000045817
11021	false	-1	TF-TG	ENSMUSG00000026815 (TF-TG) ENSMUSG00000037621
15116	false	-1	TF-TG	ENSMUSG00000026565 (TF-TG) ENSMUSG00000045932
11019	false	-1	TF-TG	ENSMUSG00000026815 (TF-TG) ENSMUSG00000037628
11017	false	-1	TF-TG	ENSMUSG00000026815 (TF-TG) ENSMUSG00000037664
15111	false	-1	TF-TG	ENSMUSG00000026565 (TF-TG) ENSMUSG00000046711
15109	false	-1	TF-TG	ENSMUSG00000026565 (TF-TG) ENSMUSG00000047003
15108	false	-1	TF-TG	ENSMUSG00000026565 (TF-TG) ENSMUSG00000047044
11010	false	-1	TF-TG	ENSMUSG00000026815 (TF-TG) ENSMUSG00000038039
15104	false	-1	TF-TG	ENSMUSG00000026565 (TF-TG) ENSMUSG00000047534
11008	false	-1	TF-TG	ENSMUSG00000026815 (TF-TG) ENSMUSG00000038146
11007	false	-1	TF-TG	ENSMUSG00000026815 (TF-TG) ENSMUSG00000038175
15101	false	-1	TF-TG	ENSMUSG00000026565 (TF-TG) ENSMUSG00000048058
15100	false	-1	TF-TG	ENSMUSG00000026565 (TF-TG) ENSMUSG00000048148
15098	false	-1	TF-TG	ENSMUSG00000026565 (TF-TG) ENSMUSG00000048965
10999	false	-1	TF-TG	ENSMUSG00000026815 (TF-TG) ENSMUSG00000038451
15094	false	-1	TF-TG	ENSMUSG00000026565 (TF-TG) ENSMUSG00000049907
10992	false	-1	TF-TG	ENSMUSG00000026815 (TF-TG) ENSMUSG00000038745
10990	false	-1	TF-TG	ENSMUSG00000026815 (TF-TG) ENSMUSG00000039050
15085	false	-1	TF-TG	ENSMUSG00000026565 (TF-TG) ENSMUSG00000051498
15082	false	-1	TF-TG	ENSMUSG00000026565 (TF-TG) ENSMUSG00000052087
10986	false	-1	TF-TG	ENSMUSG00000026815 (TF-TG) ENSMUSG00000039126
15081	false	-1	TF-TG	ENSMUSG00000026565 (TF-TG) ENSMUSG00000052135
15080	false	-1	TF-TG	ENSMUSG00000026565 (TF-TG) ENSMUSG00000052331
10984	false	-1	TF-TG	ENSMUSG00000026815 (TF-TG) ENSMUSG00000039157
10983	false	-1	TF-TG	ENSMUSG00000026815 (TF-TG) ENSMUSG00000039158
15076	false	-1	TF-TG	ENSMUSG00000026565 (TF-TG) ENSMUSG00000054200
15075	false	-1	TF-TG	ENSMUSG00000026565 (TF-TG) ENSMUSG00000054321
10979	false	-1	TF-TG	ENSMUSG00000026815 (TF-TG) ENSMUSG00000039270
15074	false	-1	TF-TG	ENSMUSG00000026565 (TF-TG) ENSMUSG00000054342
15073	false	-1	TF-TG	ENSMUSG00000026565 (TF-TG) ENSMUSG00000054612
15072	false	-1	TF-TG	ENSMUSG00000026565 (TF-TG) ENSMUSG00000054717
15069	false	-1	TF-TG	ENSMUSG00000026565 (TF-TG) ENSMUSG00000054920
10972	false	-1	TF-TG	ENSMUSG00000026815 (TF-TG) ENSMUSG00000039621
10970	false	-1	TF-TG	ENSMUSG00000026815 (TF-TG) ENSMUSG00000039676
10969	false	-1	TF-TG	ENSMUSG00000026815 (TF-TG) ENSMUSG00000039683
10967	false	-1	TF-TG	ENSMUSG00000026815 (TF-TG) ENSMUSG00000039814
10966	false	-1	TF-TG	ENSMUSG00000026815 (TF-TG) ENSMUSG00000039943
10965	false	-1	TF-TG	ENSMUSG00000026815 (TF-TG) ENSMUSG00000039982
15057	false	-1	TF-TG	ENSMUSG00000026565 (TF-TG) ENSMUSG00000057406
15055	false	-1	TF-TG	ENSMUSG00000026565 (TF-TG) ENSMUSG00000058145
15054	false	-1	TF-TG	ENSMUSG00000026565 (TF-TG) ENSMUSG00000058216
15052	false	-1	TF-TG	ENSMUSG00000026565 (TF-TG) ENSMUSG00000058799
15051	false	-1	TF-TG	ENSMUSG00000026565 (TF-TG) ENSMUSG00000059013
15048	false	-1	TF-TG	ENSMUSG00000026565 (TF-TG) ENSMUSG00000060063
15047	false	-1	TF-TG	ENSMUSG00000026565 (TF-TG) ENSMUSG00000060519
10949	false	-1	TF-TG	ENSMUSG00000026815 (TF-TG) ENSMUSG00000040710
15044	false	-1	TF-TG	ENSMUSG00000026565 (TF-TG) ENSMUSG00000061718
15042	false	-1	TF-TG	ENSMUSG00000026565 (TF-TG) ENSMUSG00000062078
10946	false	-1	TF-TG	ENSMUSG00000026815 (TF-TG) ENSMUSG00000040723
10945	false	-1	TF-TG	ENSMUSG00000026815 (TF-TG) ENSMUSG00000040860
10944	false	-1	TF-TG	ENSMUSG00000026815 (TF-TG) ENSMUSG00000040918
15039	false	-1	TF-TG	ENSMUSG00000026565 (TF-TG) ENSMUSG00000062859
10942	false	-1	TF-TG	ENSMUSG00000026815 (TF-TG) ENSMUSG00000041064
15037	false	-1	TF-TG	ENSMUSG00000026565 (TF-TG) ENSMUSG00000064215
15030	false	-1	TF-TG	ENSMUSG00000026565 (TF-TG) ENSMUSG00000070407
15028	false	-1	TF-TG	ENSMUSG00000026565 (TF-TG) ENSMUSG00000071547
10932	false	-1	TF-TG	ENSMUSG00000026815 (TF-TG) ENSMUSG00000041431
10931	false	-1	TF-TG	ENSMUSG00000026815 (TF-TG) ENSMUSG00000041498
15026	false	-1	TF-TG	ENSMUSG00000026565 (TF-TG) ENSMUSG00000072620
15024	false	-1	TF-TG	ENSMUSG00000026565 (TF-TG) ENSMUSG00000074476
15020	false	-1	TF-TG	ENSMUSG00000026565 (TF-TG) ENSMUSG00000075502
10921	false	-1	TF-TG	ENSMUSG00000026815 (TF-TG) ENSMUSG00000042109
15016	false	-1	TF-TG	ENSMUSG00000026565 (TF-TG) ENSMUSG00000078984
10920	false	-1	TF-TG	ENSMUSG00000026815 (TF-TG) ENSMUSG00000042115
15015	false	-1	TF-TG	ENSMUSG00000026565 (TF-TG) ENSMUSG00000079037
15013	false	-1	TF-TG	ENSMUSG00000026565 (TF-TG) ENSMUSG00000079442
15011	false	-1	TF-TG	ENSMUSG00000026565 (TF-TG) ENSMUSG00000079654
10915	false	-1	TF-TG	ENSMUSG00000026815 (TF-TG) ENSMUSG00000042429
12962	false	-1	TF-TG	ENSMUSG00000027544 (TF-TG) ENSMUSG00000006784
10911	false	-1	TF-TG	ENSMUSG00000026815 (TF-TG) ENSMUSG00000042532
15003	false	-1	TF-lincRNA	ENSMUSG00000026565 (TF-lincRNA) ENSMUSG00000084797
12955	false	-1	TF-TG	ENSMUSG00000027544 (TF-TG) ENSMUSG00000020741
12953	false	-1	TF-TG	ENSMUSG00000027544 (TF-TG) ENSMUSG00000020894
12951	false	-1	TF-TG	ENSMUSG00000027544 (TF-TG) ENSMUSG00000021281
12949	false	-1	TF-TG	ENSMUSG00000027544 (TF-TG) ENSMUSG00000021725
10901	false	-1	TF-TG	ENSMUSG00000026815 (TF-TG) ENSMUSG00000043004
14995	false	-1	TF-TG	ENSMUSG00000026923 (TF-TG) ENSMUSG00000078202
12946	false	-1	TF-TG	ENSMUSG00000027544 (TF-TG) ENSMUSG00000022900
12945	false	-1	TF-TG	ENSMUSG00000027544 (TF-TG) ENSMUSG00000024063
10896	false	-1	TF-TG	ENSMUSG00000026815 (TF-TG) ENSMUSG00000043391
12943	false	-1	TF-TG	ENSMUSG00000027544 (TF-TG) ENSMUSG00000024552
10895	false	-1	TF-TG	ENSMUSG00000026815 (TF-TG) ENSMUSG00000043419
12942	false	-1	TF-TG	ENSMUSG00000027544 (TF-TG) ENSMUSG00000024621
10893	false	-1	TF-TG	ENSMUSG00000026815 (TF-TG) ENSMUSG00000043639
12940	false	-1	TF-TG	ENSMUSG00000027544 (TF-TG) ENSMUSG00000025059
10891	false	-1	TF-TG	ENSMUSG00000026815 (TF-TG) ENSMUSG00000043953
14985	false	-1	TF-TG	ENSMUSG00000022528 (TF-TG) ENSMUSG00000005370
14984	false	-1	TF-TG	ENSMUSG00000022528 (TF-TG) ENSMUSG00000005533
12936	false	-1	TF-TG	ENSMUSG00000027544 (TF-TG) ENSMUSG00000026360
14983	false	-1	TF-TG	ENSMUSG00000022528 (TF-TG) ENSMUSG00000006784
12935	false	-1	TF-TG	ENSMUSG00000027544 (TF-TG) ENSMUSG00000026429
12934	false	-1	TF-TG	ENSMUSG00000027544 (TF-TG) ENSMUSG00000026480
12933	false	-1	TF-TG	ENSMUSG00000027544 (TF-TG) ENSMUSG00000026921
14980	false	-1	TF-TG	ENSMUSG00000022528 (TF-TG) ENSMUSG00000015745
12932	false	-1	TF-TG	ENSMUSG00000027544 (TF-TG) ENSMUSG00000027009
12931	false	-1	TF-TG	ENSMUSG00000027544 (TF-TG) ENSMUSG00000027456
14978	false	-1	TF-TG	ENSMUSG00000022528 (TF-TG) ENSMUSG00000019982
14977	false	-1	TF-TG	ENSMUSG00000022528 (TF-TG) ENSMUSG00000020185
10881	false	-1	TF-TG	ENSMUSG00000026815 (TF-TG) ENSMUSG00000044456
14976	false	-1	TF-TG	ENSMUSG00000022528 (TF-TG) ENSMUSG00000020230
12927	false	-1	TF-TG	ENSMUSG00000027544 (TF-TG) ENSMUSG00000028614
14974	false	-1	TF-TG	ENSMUSG00000022528 (TF-TG) ENSMUSG00000020894
12926	false	-1	TF-TG	ENSMUSG00000027544 (TF-TG) ENSMUSG00000029096
14973	false	-1	TF-TG	ENSMUSG00000022528 (TF-TG) ENSMUSG00000020897
14970	false	-1	TF-TG	ENSMUSG00000022528 (TF-TG) ENSMUSG00000021725
12920	false	-1	TF-TG	ENSMUSG00000027544 (TF-TG) ENSMUSG00000032356
14967	false	-1	TF-TG	ENSMUSG00000022528 (TF-TG) ENSMUSG00000022018
14966	false	-1	TF-TG	ENSMUSG00000022528 (TF-TG) ENSMUSG00000022136
12918	false	-1	TF-TG	ENSMUSG00000027544 (TF-TG) ENSMUSG00000032549
12917	false	-1	TF-TG	ENSMUSG00000027544 (TF-TG) ENSMUSG00000032656
14963	false	-1	TF-TG	ENSMUSG00000022528 (TF-TG) ENSMUSG00000022360
12915	false	-1	TF-TG	ENSMUSG00000027544 (TF-TG) ENSMUSG00000033530
12914	false	-1	TF-TG	ENSMUSG00000027544 (TF-TG) ENSMUSG00000034858
10866	false	-1	TF-TG	ENSMUSG00000026815 (TF-TG) ENSMUSG00000045817
12913	false	-1	TF-TG	ENSMUSG00000027544 (TF-TG) ENSMUSG00000034883
14960	false	-1	TF-TG	ENSMUSG00000022528 (TF-TG) ENSMUSG00000023009
10864	false	-1	TF-TG	ENSMUSG00000026815 (TF-TG) ENSMUSG00000045932
12911	false	-1	TF-TG	ENSMUSG00000027544 (TF-TG) ENSMUSG00000036526
12910	false	-1	TF-TG	ENSMUSG00000027544 (TF-TG) ENSMUSG00000037447
10862	false	-1	TF-TG	ENSMUSG00000026815 (TF-TG) ENSMUSG00000046070
14957	false	-1	TF-TG	ENSMUSG00000022528 (TF-TG) ENSMUSG00000024597
14956	false	-1	TF-TG	ENSMUSG00000022528 (TF-TG) ENSMUSG00000024743
12908	false	-1	TF-TG	ENSMUSG00000027544 (TF-TG) ENSMUSG00000038175
14955	false	-1	TF-TG	ENSMUSG00000022528 (TF-TG) ENSMUSG00000025584
12907	false	-1	TF-TG	ENSMUSG00000027544 (TF-TG) ENSMUSG00000038451
12904	false	-1	TF-TG	ENSMUSG00000027544 (TF-TG) ENSMUSG00000039158
14951	false	-1	TF-TG	ENSMUSG00000022528 (TF-TG) ENSMUSG00000026102
14949	false	-1	TF-TG	ENSMUSG00000022528 (TF-TG) ENSMUSG00000026321
14948	false	-1	TF-TG	ENSMUSG00000022528 (TF-TG) ENSMUSG00000026565
14946	false	-1	TF-TG	ENSMUSG00000022528 (TF-TG) ENSMUSG00000026785
10849	false	-1	TF-TG	ENSMUSG00000026815 (TF-TG) ENSMUSG00000046711
14944	false	-1	TF-TG	ENSMUSG00000022528 (TF-TG) ENSMUSG00000026879
12896	false	-1	TF-TG	ENSMUSG00000027544 (TF-TG) ENSMUSG00000043419
14943	false	-1	TF-TG	ENSMUSG00000022528 (TF-TG) ENSMUSG00000027381
12895	false	-1	TF-TG	ENSMUSG00000027544 (TF-TG) ENSMUSG00000043953
12894	false	-1	TF-TG	ENSMUSG00000027544 (TF-TG) ENSMUSG00000044456
10846	false	-1	TF-TG	ENSMUSG00000026815 (TF-TG) ENSMUSG00000047003
10845	false	-1	TF-TG	ENSMUSG00000026815 (TF-TG) ENSMUSG00000047044
14939	false	-1	TF-TG	ENSMUSG00000022528 (TF-TG) ENSMUSG00000028341
10843	false	-1	TF-TG	ENSMUSG00000026815 (TF-TG) ENSMUSG00000047139
14938	false	-1	TF-TG	ENSMUSG00000022528 (TF-TG) ENSMUSG00000028560
14937	false	-1	TF-TG	ENSMUSG00000022528 (TF-TG) ENSMUSG00000028633
12889	false	-1	TF-TG	ENSMUSG00000027544 (TF-TG) ENSMUSG00000049807
12887	false	-1	TF-TG	ENSMUSG00000027544 (TF-TG) ENSMUSG00000050395
14933	false	-1	TF-TG	ENSMUSG00000022528 (TF-TG) ENSMUSG00000031367
10836	false	-1	TF-TG	ENSMUSG00000026815 (TF-TG) ENSMUSG00000047534
14931	false	-1	TF-TG	ENSMUSG00000022528 (TF-TG) ENSMUSG00000032278
14930	false	-1	TF-TG	ENSMUSG00000022528 (TF-TG) ENSMUSG00000032338
12882	false	-1	TF-TG	ENSMUSG00000027544 (TF-TG) ENSMUSG00000053581
12881	false	-1	TF-TG	ENSMUSG00000027544 (TF-TG) ENSMUSG00000054342
12880	false	-1	TF-TG	ENSMUSG00000027544 (TF-TG) ENSMUSG00000054920
14927	false	-1	TF-TG	ENSMUSG00000022528 (TF-TG) ENSMUSG00000033222
12878	false	-1	TF-TG	ENSMUSG00000027544 (TF-TG) ENSMUSG00000055629
10830	false	-1	TF-TG	ENSMUSG00000026815 (TF-TG) ENSMUSG00000047986
14925	false	-1	TF-TG	ENSMUSG00000022528 (TF-TG) ENSMUSG00000033871
12877	false	-1	TF-TG	ENSMUSG00000027544 (TF-TG) ENSMUSG00000058624
14924	false	-1	TF-TG	ENSMUSG00000022528 (TF-TG) ENSMUSG00000034317
10828	false	-1	TF-TG	ENSMUSG00000026815 (TF-TG) ENSMUSG00000048058
14923	false	-1	TF-TG	ENSMUSG00000022528 (TF-TG) ENSMUSG00000034472
14922	false	-1	TF-TG	ENSMUSG00000022528 (TF-TG) ENSMUSG00000034773
12874	false	-1	TF-TG	ENSMUSG00000027544 (TF-TG) ENSMUSG00000062078
10826	false	-1	TF-TG	ENSMUSG00000026815 (TF-TG) ENSMUSG00000048148
14920	false	-1	TF-TG	ENSMUSG00000022528 (TF-TG) ENSMUSG00000035901
14919	false	-1	TF-TG	ENSMUSG00000022528 (TF-TG) ENSMUSG00000036913
12871	false	-1	TF-TG	ENSMUSG00000027544 (TF-TG) ENSMUSG00000069515
14918	false	-1	TF-TG	ENSMUSG00000022528 (TF-TG) ENSMUSG00000037235
12870	false	-1	TF-TG	ENSMUSG00000027544 (TF-TG) ENSMUSG00000070407
14917	false	-1	TF-TG	ENSMUSG00000022528 (TF-TG) ENSMUSG00000037447
14916	false	-1	TF-TG	ENSMUSG00000022528 (TF-TG) ENSMUSG00000037579
12868	false	-1	TF-TG	ENSMUSG00000027544 (TF-TG) ENSMUSG00000072620
14915	false	-1	TF-TG	ENSMUSG00000022528 (TF-TG) ENSMUSG00000037664
14913	false	-1	TF-TG	ENSMUSG00000022528 (TF-TG) ENSMUSG00000039126
12865	false	-1	TF-lincRNA	ENSMUSG00000027544 (TF-lincRNA) ENSMUSG00000084797
10817	false	-1	TF-TG	ENSMUSG00000026815 (TF-TG) ENSMUSG00000048965
14911	false	-1	TF-TG	ENSMUSG00000022528 (TF-TG) ENSMUSG00000039683
14909	false	-1	TF-TG	ENSMUSG00000022528 (TF-TG) ENSMUSG00000040710
14904	false	-1	TF-TG	ENSMUSG00000022528 (TF-TG) ENSMUSG00000043004
10808	false	-1	TF-TG	ENSMUSG00000026815 (TF-TG) ENSMUSG00000049723
14903	false	-1	TF-TG	ENSMUSG00000022528 (TF-TG) ENSMUSG00000043391
10807	false	-1	TF-TG	ENSMUSG00000026815 (TF-TG) ENSMUSG00000049807
14901	false	-1	TF-TG	ENSMUSG00000022528 (TF-TG) ENSMUSG00000043639
10803	false	-1	TF-TG	ENSMUSG00000026815 (TF-TG) ENSMUSG00000049907
14898	false	-1	TF-TG	ENSMUSG00000022528 (TF-TG) ENSMUSG00000045817
14897	false	-1	TF-TG	ENSMUSG00000022528 (TF-TG) ENSMUSG00000046711
14896	false	-1	TF-TG	ENSMUSG00000022528 (TF-TG) ENSMUSG00000047003
14895	false	-1	TF-TG	ENSMUSG00000022528 (TF-TG) ENSMUSG00000047044
10798	false	-1	TF-TG	ENSMUSG00000026815 (TF-TG) ENSMUSG00000050395
14891	false	-1	TF-TG	ENSMUSG00000022528 (TF-TG) ENSMUSG00000052135
14890	false	-1	TF-TG	ENSMUSG00000022528 (TF-TG) ENSMUSG00000054321
14889	false	-1	TF-TG	ENSMUSG00000022528 (TF-TG) ENSMUSG00000054342
14884	false	-1	TF-TG	ENSMUSG00000022528 (TF-TG) ENSMUSG00000057406
14883	false	-1	TF-TG	ENSMUSG00000022528 (TF-TG) ENSMUSG00000059013
14882	false	-1	TF-TG	ENSMUSG00000022528 (TF-TG) ENSMUSG00000060548
14881	false	-1	TF-TG	ENSMUSG00000022528 (TF-TG) ENSMUSG00000061718
14880	false	-1	TF-TG	ENSMUSG00000022528 (TF-TG) ENSMUSG00000062078
14878	false	-1	TF-TG	ENSMUSG00000022528 (TF-TG) ENSMUSG00000062859
10782	false	-1	TF-TG	ENSMUSG00000026815 (TF-TG) ENSMUSG00000051498
14874	false	-1	TF-TG	ENSMUSG00000022528 (TF-TG) ENSMUSG00000071547
10777	false	-1	TF-TG	ENSMUSG00000026815 (TF-TG) ENSMUSG00000052087
14871	false	-1	TF-TG	ENSMUSG00000022528 (TF-TG) ENSMUSG00000074715
10775	false	-1	TF-TG	ENSMUSG00000026815 (TF-TG) ENSMUSG00000052135
14870	false	-1	TF-TG	ENSMUSG00000022528 (TF-TG) ENSMUSG00000079654
10773	false	-1	TF-TG	ENSMUSG00000026815 (TF-TG) ENSMUSG00000052331
14862	false	-1	TF-TG	ENSMUSG00000035158 (TF-TG) ENSMUSG00000002489
14860	false	-1	TF-TG	ENSMUSG00000035158 (TF-TG) ENSMUSG00000002885
14859	false	-1	TF-TG	ENSMUSG00000035158 (TF-TG) ENSMUSG00000002997
10763	false	-1	TF-TG	ENSMUSG00000026815 (TF-TG) ENSMUSG00000053334
14856	false	-1	TF-TG	ENSMUSG00000035158 (TF-TG) ENSMUSG00000005370
10760	false	-1	TF-TG	ENSMUSG00000026815 (TF-TG) ENSMUSG00000053581
14853	false	-1	TF-TG	ENSMUSG00000035158 (TF-TG) ENSMUSG00000006784
10756	false	-1	TF-TG	ENSMUSG00000026815 (TF-TG) ENSMUSG00000054200
14851	false	-1	TF-TG	ENSMUSG00000035158 (TF-TG) ENSMUSG00000017466
10755	false	-1	TF-TG	ENSMUSG00000026815 (TF-TG) ENSMUSG00000054321
10754	false	-1	TF-TG	ENSMUSG00000026815 (TF-TG) ENSMUSG00000054342
14849	false	-1	TF-TG	ENSMUSG00000035158 (TF-TG) ENSMUSG00000017652
14847	false	-1	TF-TG	ENSMUSG00000035158 (TF-TG) ENSMUSG00000019302
10751	false	-1	TF-TG	ENSMUSG00000026815 (TF-TG) ENSMUSG00000054612
14846	false	-1	TF-TG	ENSMUSG00000035158 (TF-TG) ENSMUSG00000019773
10749	false	-1	TF-TG	ENSMUSG00000026815 (TF-TG) ENSMUSG00000054717
14841	false	-1	TF-TG	ENSMUSG00000035158 (TF-TG) ENSMUSG00000020712
10745	false	-1	TF-TG	ENSMUSG00000026815 (TF-TG) ENSMUSG00000054920
10742	false	-1	TF-TG	ENSMUSG00000026815 (TF-TG) ENSMUSG00000055612
10741	false	-1	TF-TG	ENSMUSG00000026815 (TF-TG) ENSMUSG00000055629
14835	false	-1	TF-TG	ENSMUSG00000035158 (TF-TG) ENSMUSG00000022136
14834	false	-1	TF-TG	ENSMUSG00000035158 (TF-TG) ENSMUSG00000022385
14833	false	-1	TF-TG	ENSMUSG00000035158 (TF-TG) ENSMUSG00000022528
14832	false	-1	TF-TG	ENSMUSG00000035158 (TF-TG) ENSMUSG00000022864
14828	false	-1	TF-TG	ENSMUSG00000035158 (TF-TG) ENSMUSG00000024301
14827	false	-1	TF-TG	ENSMUSG00000035158 (TF-TG) ENSMUSG00000024590
14826	false	-1	TF-TG	ENSMUSG00000035158 (TF-TG) ENSMUSG00000024597
14824	false	-1	TF-TG	ENSMUSG00000035158 (TF-TG) ENSMUSG00000024897
14822	false	-1	TF-TG	ENSMUSG00000035158 (TF-TG) ENSMUSG00000025584
10725	false	-1	TF-TG	ENSMUSG00000026815 (TF-TG) ENSMUSG00000057092
14819	false	-1	TF-TG	ENSMUSG00000035158 (TF-TG) ENSMUSG00000026281
14817	false	-1	TF-TG	ENSMUSG00000035158 (TF-TG) ENSMUSG00000026429
10721	false	-1	TF-TG	ENSMUSG00000026815 (TF-TG) ENSMUSG00000057406
14816	false	-1	TF-TG	ENSMUSG00000035158 (TF-TG) ENSMUSG00000026480
14813	false	-1	TF-TG	ENSMUSG00000035158 (TF-TG) ENSMUSG00000026864
14812	false	-1	TF-TG	ENSMUSG00000035158 (TF-TG) ENSMUSG00000026879
14811	false	-1	TF-TG	ENSMUSG00000035158 (TF-TG) ENSMUSG00000026921
10715	false	-1	TF-TG	ENSMUSG00000026815 (TF-TG) ENSMUSG00000058145
14810	false	-1	TF-TG	ENSMUSG00000035158 (TF-TG) ENSMUSG00000027009
10714	false	-1	TF-TG	ENSMUSG00000026815 (TF-TG) ENSMUSG00000058216
10712	false	-1	TF-TG	ENSMUSG00000026815 (TF-TG) ENSMUSG00000058624
14807	false	-1	TF-TG	ENSMUSG00000035158 (TF-TG) ENSMUSG00000027381
10709	false	-1	TF-TG	ENSMUSG00000026815 (TF-TG) ENSMUSG00000058799
14803	false	-1	TF-TG	ENSMUSG00000035158 (TF-TG) ENSMUSG00000027878
10707	false	-1	TF-TG	ENSMUSG00000026815 (TF-TG) ENSMUSG00000059013
14801	false	-1	TF-TG	ENSMUSG00000035158 (TF-TG) ENSMUSG00000028341
14798	false	-1	TF-TG	ENSMUSG00000035158 (TF-TG) ENSMUSG00000028560
14797	false	-1	TF-TG	ENSMUSG00000035158 (TF-TG) ENSMUSG00000028614
14794	false	-1	TF-TG	ENSMUSG00000035158 (TF-TG) ENSMUSG00000029177
10698	false	-1	TF-TG	ENSMUSG00000026815 (TF-TG) ENSMUSG00000060063
14793	false	-1	TF-TG	ENSMUSG00000035158 (TF-TG) ENSMUSG00000029436
10697	false	-1	TF-TG	ENSMUSG00000026815 (TF-TG) ENSMUSG00000060519
14792	false	-1	TF-TG	ENSMUSG00000035158 (TF-TG) ENSMUSG00000029470
10696	false	-1	TF-TG	ENSMUSG00000026815 (TF-TG) ENSMUSG00000060548
10694	false	-1	TF-TG	ENSMUSG00000026815 (TF-TG) ENSMUSG00000061414
14787	false	-1	TF-TG	ENSMUSG00000035158 (TF-TG) ENSMUSG00000030275
14786	false	-1	TF-TG	ENSMUSG00000035158 (TF-TG) ENSMUSG00000030340
10690	false	-1	TF-TG	ENSMUSG00000026815 (TF-TG) ENSMUSG00000061718
10688	false	-1	TF-TG	ENSMUSG00000026815 (TF-TG) ENSMUSG00000062078
14781	false	-1	TF-TG	ENSMUSG00000035158 (TF-TG) ENSMUSG00000031367
14779	false	-1	TF-TG	ENSMUSG00000035158 (TF-TG) ENSMUSG00000031903
10681	false	-1	TF-TG	ENSMUSG00000026815 (TF-TG) ENSMUSG00000062859
10679	false	-1	TF-TG	ENSMUSG00000026815 (TF-TG) ENSMUSG00000063568
14772	false	-1	TF-TG	ENSMUSG00000035158 (TF-TG) ENSMUSG00000032640
14771	false	-1	TF-TG	ENSMUSG00000035158 (TF-TG) ENSMUSG00000032783
14770	false	-1	TF-TG	ENSMUSG00000035158 (TF-TG) ENSMUSG00000033530
14769	false	-1	TF-TG	ENSMUSG00000035158 (TF-TG) ENSMUSG00000033684
10673	false	-1	TF-TG	ENSMUSG00000026815 (TF-TG) ENSMUSG00000064215
14767	false	-1	TF-TG	ENSMUSG00000035158 (TF-TG) ENSMUSG00000034116
14766	false	-1	TF-TG	ENSMUSG00000035158 (TF-TG) ENSMUSG00000034317
14765	false	-1	TF-TG	ENSMUSG00000035158 (TF-TG) ENSMUSG00000034586
14761	false	-1	TF-TG	ENSMUSG00000035158 (TF-TG) ENSMUSG00000037235
14758	false	-1	TF-TG	ENSMUSG00000035158 (TF-TG) ENSMUSG00000038175
14757	false	-1	TF-TG	ENSMUSG00000035158 (TF-TG) ENSMUSG00000038451
10661	false	-1	TF-TG	ENSMUSG00000026815 (TF-TG) ENSMUSG00000068877
14755	false	-1	TF-TG	ENSMUSG00000035158 (TF-TG) ENSMUSG00000039050
14754	false	-1	TF-TG	ENSMUSG00000035158 (TF-TG) ENSMUSG00000039158
10658	false	-1	TF-TG	ENSMUSG00000026815 (TF-TG) ENSMUSG00000069515
14752	false	-1	TF-TG	ENSMUSG00000035158 (TF-TG) ENSMUSG00000039621
10650	false	-1	TF-TG	ENSMUSG00000026815 (TF-TG) ENSMUSG00000070407
14738	false	-1	TF-TG	ENSMUSG00000035158 (TF-TG) ENSMUSG00000043004
10640	false	-1	TF-TG	ENSMUSG00000026815 (TF-TG) ENSMUSG00000071547
14734	false	-1	TF-TG	ENSMUSG00000035158 (TF-TG) ENSMUSG00000045817
14731	false	-1	TF-TG	ENSMUSG00000035158 (TF-TG) ENSMUSG00000047003
10633	false	-1	TF-TG	ENSMUSG00000026815 (TF-TG) ENSMUSG00000072620
14728	false	-1	TF-TG	ENSMUSG00000035158 (TF-TG) ENSMUSG00000047986
14727	false	-1	TF-TG	ENSMUSG00000035158 (TF-TG) ENSMUSG00000048058
10625	false	-1	TF-TG	ENSMUSG00000026815 (TF-TG) ENSMUSG00000074217
10623	false	-1	TF-TG	ENSMUSG00000026815 (TF-TG) ENSMUSG00000074476
10622	false	-1	TF-TG	ENSMUSG00000026815 (TF-TG) ENSMUSG00000074604
14717	false	-1	TF-TG	ENSMUSG00000035158 (TF-TG) ENSMUSG00000052087
14716	false	-1	TF-TG	ENSMUSG00000035158 (TF-TG) ENSMUSG00000052331
10619	false	-1	TF-TG	ENSMUSG00000026815 (TF-TG) ENSMUSG00000074715
14714	false	-1	TF-TG	ENSMUSG00000035158 (TF-TG) ENSMUSG00000054321
14713	false	-1	TF-TG	ENSMUSG00000035158 (TF-TG) ENSMUSG00000054342
14711	false	-1	TF-TG	ENSMUSG00000035158 (TF-TG) ENSMUSG00000054920
10612	false	-1	TF-TG	ENSMUSG00000026815 (TF-TG) ENSMUSG00000075502
10609	false	-1	TF-TG	ENSMUSG00000026815 (TF-TG) ENSMUSG00000075702
14703	false	-1	TF-TG	ENSMUSG00000035158 (TF-TG) ENSMUSG00000058145
10607	false	-1	TF-TG	ENSMUSG00000026815 (TF-TG) ENSMUSG00000078202
14701	false	-1	TF-TG	ENSMUSG00000035158 (TF-TG) ENSMUSG00000059013
14700	false	-1	TF-TG	ENSMUSG00000035158 (TF-TG) ENSMUSG00000061414
10604	false	-1	TF-TG	ENSMUSG00000026815 (TF-TG) ENSMUSG00000078650
14698	false	-1	TF-TG	ENSMUSG00000035158 (TF-TG) ENSMUSG00000062078
10602	false	-1	TF-TG	ENSMUSG00000026815 (TF-TG) ENSMUSG00000078984
10601	false	-1	TF-TG	ENSMUSG00000026815 (TF-TG) ENSMUSG00000079037
14695	false	-1	TF-TG	ENSMUSG00000035158 (TF-TG) ENSMUSG00000063568
14694	false	-1	TF-TG	ENSMUSG00000035158 (TF-TG) ENSMUSG00000064215
10598	false	-1	TF-TG	ENSMUSG00000026815 (TF-TG) ENSMUSG00000079442
10596	false	-1	TF-TG	ENSMUSG00000026815 (TF-TG) ENSMUSG00000079654
14690	false	-1	TF-TG	ENSMUSG00000035158 (TF-TG) ENSMUSG00000074217
14689	false	-1	TF-TG	ENSMUSG00000035158 (TF-TG) ENSMUSG00000074604
14688	false	-1	TF-TG	ENSMUSG00000035158 (TF-TG) ENSMUSG00000074715
14687	false	-1	TF-TG	ENSMUSG00000035158 (TF-TG) ENSMUSG00000079037
14683	false	-1	TF-lincRNA	ENSMUSG00000035158 (TF-lincRNA) ENSMUSG00000084797
10576	false	-1	TF-lincRNA	ENSMUSG00000026815 (TF-lincRNA) ENSMUSG00000084797
14537	false	-1	TF-TG	ENSMUSG00000037583 (TF-TG) ENSMUSG00000019066
14536	false	-1	TF-TG	ENSMUSG00000037583 (TF-TG) ENSMUSG00000020712
14533	false	-1	TF-TG	ENSMUSG00000037583 (TF-TG) ENSMUSG00000024301
14532	false	-1	TF-TG	ENSMUSG00000037583 (TF-TG) ENSMUSG00000024590
14531	false	-1	TF-TG	ENSMUSG00000037583 (TF-TG) ENSMUSG00000026321
14530	false	-1	TF-TG	ENSMUSG00000037583 (TF-TG) ENSMUSG00000026509
14528	false	-1	TF-TG	ENSMUSG00000037583 (TF-TG) ENSMUSG00000027878
14525	false	-1	TF-TG	ENSMUSG00000037583 (TF-TG) ENSMUSG00000028560
14522	false	-1	TF-TG	ENSMUSG00000037583 (TF-TG) ENSMUSG00000034858
14521	false	-1	TF-TG	ENSMUSG00000037583 (TF-TG) ENSMUSG00000034883
14519	false	-1	TF-TG	ENSMUSG00000037583 (TF-TG) ENSMUSG00000038175
14515	false	-1	TF-TG	ENSMUSG00000037583 (TF-TG) ENSMUSG00000071547
8228	false	-1	TF-TG	ENSMUSG00000026610 (TF-TG) ENSMUSG00000020897
8226	false	-1	TF-TG	ENSMUSG00000026610 (TF-TG) ENSMUSG00000060063
5944	false	-1	TF-TG	ENSMUSG00000032238 (TF-TG) ENSMUSG00000002885
5939	false	-1	TF-TG	ENSMUSG00000032238 (TF-TG) ENSMUSG00000004151
5938	false	-1	TF-TG	ENSMUSG00000032238 (TF-TG) ENSMUSG00000004366
5935	false	-1	TF-TG	ENSMUSG00000032238 (TF-TG) ENSMUSG00000005410
5928	false	-1	TF-TG	ENSMUSG00000032238 (TF-TG) ENSMUSG00000006784
5920	false	-1	TF-TG	ENSMUSG00000032238 (TF-TG) ENSMUSG00000015396
5917	false	-1	TF-TG	ENSMUSG00000032238 (TF-TG) ENSMUSG00000016526
5912	false	-1	TF-TG	ENSMUSG00000032238 (TF-TG) ENSMUSG00000017446
5905	false	-1	TF-TG	ENSMUSG00000032238 (TF-TG) ENSMUSG00000018486
5903	false	-1	TF-TG	ENSMUSG00000032238 (TF-TG) ENSMUSG00000019188
5900	false	-1	TF-TG	ENSMUSG00000032238 (TF-TG) ENSMUSG00000019302
5898	false	-1	TF-TG	ENSMUSG00000032238 (TF-TG) ENSMUSG00000019564
5897	false	-1	TF-TG	ENSMUSG00000032238 (TF-TG) ENSMUSG00000019773
5893	false	-1	TF-TG	ENSMUSG00000032238 (TF-TG) ENSMUSG00000019947
5892	false	-1	TF-TG	ENSMUSG00000032238 (TF-TG) ENSMUSG00000019986
5889	false	-1	TF-TG	ENSMUSG00000032238 (TF-TG) ENSMUSG00000020135
5887	false	-1	TF-TG	ENSMUSG00000032238 (TF-TG) ENSMUSG00000020472
5883	false	-1	TF-TG	ENSMUSG00000032238 (TF-TG) ENSMUSG00000020668
5882	false	-1	TF-TG	ENSMUSG00000032238 (TF-TG) ENSMUSG00000020712
5881	false	-1	TF-TG	ENSMUSG00000032238 (TF-TG) ENSMUSG00000020741
5879	false	-1	TF-TG	ENSMUSG00000032238 (TF-TG) ENSMUSG00000020894
5878	false	-1	TF-TG	ENSMUSG00000032238 (TF-TG) ENSMUSG00000020897
5871	false	-1	TF-TG	ENSMUSG00000032238 (TF-TG) ENSMUSG00000021221
5870	false	-1	TF-TG	ENSMUSG00000032238 (TF-TG) ENSMUSG00000021281
5867	false	-1	TF-TG	ENSMUSG00000032238 (TF-TG) ENSMUSG00000021539
5864	false	-1	TF-TG	ENSMUSG00000032238 (TF-TG) ENSMUSG00000021725
5860	false	-1	TF-TG	ENSMUSG00000032238 (TF-TG) ENSMUSG00000022136
5858	false	-1	TF-TG	ENSMUSG00000032238 (TF-TG) ENSMUSG00000022177
5856	false	-1	TF-TG	ENSMUSG00000032238 (TF-TG) ENSMUSG00000022332
5854	false	-1	TF-TG	ENSMUSG00000032238 (TF-TG) ENSMUSG00000022360
5853	false	-1	TF-TG	ENSMUSG00000032238 (TF-TG) ENSMUSG00000022385
5852	false	-1	TF-TG	ENSMUSG00000032238 (TF-TG) ENSMUSG00000022436
5851	false	-1	TF-TG	ENSMUSG00000032238 (TF-TG) ENSMUSG00000022528
5850	false	-1	TF-TG	ENSMUSG00000032238 (TF-TG) ENSMUSG00000022748
5848	false	-1	TF-TG	ENSMUSG00000032238 (TF-TG) ENSMUSG00000022864
5837	false	-1	TF-TG	ENSMUSG00000032238 (TF-TG) ENSMUSG00000024301
5834	false	-1	TF-TG	ENSMUSG00000032238 (TF-TG) ENSMUSG00000024525
5833	false	-1	TF-TG	ENSMUSG00000032238 (TF-TG) ENSMUSG00000024590
5832	false	-1	TF-TG	ENSMUSG00000032238 (TF-TG) ENSMUSG00000024621
5831	false	-1	TF-TG	ENSMUSG00000032238 (TF-TG) ENSMUSG00000024644
5828	false	-1	TF-TG	ENSMUSG00000032238 (TF-TG) ENSMUSG00000024795
5824	false	-1	TF-TG	ENSMUSG00000032238 (TF-TG) ENSMUSG00000025019
5823	false	-1	TF-TG	ENSMUSG00000032238 (TF-TG) ENSMUSG00000025059
[truncated: 17,178 more rows]
