# Supplementary material for: Regulatory network analysis of Paneth cell and goblet cell enriched gut organoids using transcriptomics approaches
Source: Royal Society of Chemistry journal article supplement (doi:10.1039/c9mo00130a), 2019-12-10
Supplement: c9mo00130a2.cys [file c9mo00130a2.cys › CytoscapeSession-2019_09_26-21_57/tables/36-Gob_network_lfc1.txt/SHARED_ATTRS-org.cytoscape.model.CyNetwork-36+shared+network.cytable]

CyCSV-Version	1
SUID	shared name
java.lang.Long	java.lang.String
36 shared network
62	Gob_network_lfc1.txt
36
21371	1: Cluster 3 (Score: 5.923)
21381	1: Cluster 1 (Score: 8.022)
21391	1: Cluster 2 (Score: 7.429)
21401	1: Cluster 4 (Score: 3.714)
21411	1: Cluster 5 (Score: 3.333)
21421	1: Cluster 6 (Score: 2.667)
21431	1: Cluster 7 (Score: 2.667)
