# Supplementary material for: Regulatory network analysis of Paneth cell and goblet cell enriched gut organoids using transcriptomics approaches
Source: Royal Society of Chemistry journal article supplement (doi:10.1039/c9mo00130a), 2019-12-10
Supplement: c9mo00130a2.cys [file c9mo00130a2.cys › CytoscapeSession-2019_09_26-21_57/tables/36-Gob_network_lfc1.txt/SHARED_ATTRS-org.cytoscape.model.CyNode-36+shared+node.cytable]

"CyCSV-Version","1"
"SUID","chea3_Library","chea3_Overlapping_Genes","chea3_Rank","chea3_Score","Cluster","genesymbol","isExcludedFromPaths","isInPath","MCODE_Cluster","MCODE_Node_Status","MCODE_Score","Node_Status","Score","shared name"
"java.lang.Long","java.lang.String","java.lang.String","java.lang.Integer","java.lang.Double","java.util.List<java.lang.String>","java.lang.String","java.lang.Boolean","java.lang.Boolean","java.util.List<java.lang.String>","java.lang.String","java.lang.Double","java.lang.String","java.lang.Double","java.lang.String"
"","mutable","mutable","mutable","mutable","mutable","mutable","","","mutable","mutable","mutable","mutable","mutable",""
"36 shared node",""
"667","","",,,"Cluster 1","Igfals","false","false","Cluster 3","Clustered","8.181818181818182","Clustered","9.833333333333334","ENSMUSG00000046070"
"1691","","",,,"Cluster 1","Kbtbd6","false","false","Cluster 3","Clustered","9.0","Clustered","10.0","ENSMUSG00000075502"
"1178","","",,,"Cluster 1","Rgcc","false","false","Cluster 3","Clustered","7.822222222222222","Clustered","8.345454545454546","ENSMUSG00000022018"
"1689","","",,,"Cluster 1","Nrarp","false","false","Cluster 3","Clustered","8.836363636363636","Clustered","8.717948717948719","ENSMUSG00000078202"
"1176","","",,,"Cluster 2","Apba1","false","false","Cluster 3","Clustered","7.418181818181818","Clustered","7.909090909090909","ENSMUSG00000024897"
"1687","","",,,"Cluster 1","G6pc","false","false","Cluster 3","Clustered","7.418181818181818","Clustered","8.787878787878787","ENSMUSG00000078650"
"1685","","",,,"Cluster 1","Prnp","false","false","Cluster 3","Clustered","7.5636363636363635","Clustered","10.0","ENSMUSG00000079037"
"1170","","",,,"Cluster 1","Hcn4","false","false","Cluster 3","Clustered","8.672727272727272","Clustered","10.166666666666666","ENSMUSG00000032338"
"2192","Literature ChIP-seq,122;ARCHS4 Coexpression,40;ENCODE ChIP-seq,106;Enrichr Queries,2;ReMap ChIP-seq,97;GTEx Coexpression,9","MDC1,NOC2L,SMC4,CLDN1,SMC2,SPIB,MYC,LIPH,CREB3L2,MYB,STMN1,GTSE1,HOXA4,IER3,CUBN,SYTL1,RNASE4,KNSTRN,WDR76,GPR162,EID2,SERPING1,PRR11,TSPYL4,ASF1B,PIF1,CDCA3,SHMT2,SHMT1,CDCA7,AGAP2,NCAPG,SKA3,IQGAP3,NCAPH,SKA1,ADAMTS10,FIGNL1,PDGFC,S100A13,ST3GAL2,NKX2-2,PLK4,BARD1,PLK1,RMDN2,CDC7,CDC6,NR0B2,FOSL1,MOV10,UCK2,TNFSF4,XKR5,WDR47,PHF1,NCAPG2,ATF7IP2,JPH4,CHAF1B,TUBA1B,CHAF1A,TUBA1A,MECOM,IMPA2,NUF2,PBK,TK1,CEP55,NDC1,TCF19,CEP68,TEAD4,HELLS,DENND2C,RMI2,CLUH,ARG1,KCND3,ELOVL2,WDR31,PAX6,F2,DDB2,CIT,TUBB2A,KIFC1,INCENP,CKS2,KIFC3,GPRC5C,GART,VAMP2,PKN3,SEZ6,HOXD13,AFP,CENPA,FGD1,UNG,SLC17A9,TCOF1,USP1,METTL7B,MBNL3,TAF9B,CENPU,CASP8AP2,CDKN2C,ATAD5,GK,GPR55,ATAD2,SYVN1,RRP1B,AGT,CENPE,SPSB2,CENPF,CENPH,CENPI,CENPM,CENPN,CENPP,YPEL3,CDKN3,NRROS,IRS1,GMNN,TNFRSF8,PIM2,SH2D6,ZFP37,RNF43,MYLIP,IGFBP3,IGFBP2,VRK1,CDC25C,TRAIP,MSH6,TPST1,MELK,MSH2,HAT1,BLM,DNMT1,SEMA7A,CPB2,TROAP,HVCN1,GLIS3,ITPR2,PKMYT1,RAD51AP1,NEUROD1,BCL2L11,ZFP57,ORC1,MDN1,FANCI,CCDC18,AMBP,OSBPL5,BDNF,CCDC15,ZBTB10,FANCB,CDK6,GGCX,LHX1,CDK1,CPE,PLEKHM3,KCNK6,CNTNAP2,MCM8,MCM10,LRMP,FOXM1,SPN,DUSP10,EXO1,ITGB7,SPDL1,RFC5,SLC36A1,RFC3,RFC4,ITGA4,GPX3,KCNAB3,MMS22L,ASPM,DBF4,ESPL1,SAPCD2,MCM3,MCM4,BIRC5,MCM5,ANG,MCM6,MTFR2,DTL,DCTPP1,MCM2,ACSS2,UHRF1,CCDC68,SEMA3G,TTK,NSL1,E2F1,E2F7,E2F8,DUT,SPAG5,MND1,DHODH,RAD51,PRC1,IMPDH2,SLC25A30,INSM1,IFITM3,LRR1,CCNF,DIXDC1,MKI67,CDC20,CHEK2,CHEK1,LONP1,FBXO5,SKP2,TIPIN,ENTPD3,IL1R1,PAQR5,ESCO2,KNL1,P3H3,MIF,NEIL3,GSAP,DNA2,ZG16,KDELR3,KIF20B,SDC4,ARX,TSHZ2,MGST2,DSN1,RACGAP1,STC2,PCK1,TMEM184C,DDIAS,XRCC2,SLC33A1,OSGIN1,RAB27A,PYCR2,SMARCA1,TPX2,POLA1,ANLN,SPATS2L,C2CD2L,TOP2A,TENM4,SUV39H1,KIF14,BRCA1,KIF11,BRCA2,CX3CL1,KIF15,SERP1,SH3PXD2A,MIS18BP1,FFAR3,FFAR1,WARS,APOBEC2,KIF23,KIF22,IL17RD,RAD51B,RNF144B,B3GNT9,CLDN14,KIF2C,SGK2,DTYMK,PCNA,STX17,INPP1,PRIM1,SLC43A1,TYMS,RAD54B,PSMC3IP,RAD54L,MSX1,GINS1,RPA2,SORBS3,ALDH4A1,RIT1,MIS18A,KBTBD6,GSTA4,KRT15,CACHD1,GHRL,TRIP13,SPC24,MAD2L1,KLB,FOXA1,ERCC6L,ZWILCH,DSCC1,BUB1B,TTF2,TMEM140,CELSR3,RDM1,SCGN,CCND1,KNTC1,ENPP3,PDE8A,GEN1,PDIA3,G6PC,LIG1,ZGRF1,ARID5B,PDIA6,RUNDC3A,PROCR,ERN2,CCNE2,FAM185A,GEMIN5,LMX1B,ARHGAP19,ZFP36L2,CCNB2,CCNB1,PODXL,CLSPN,FAM83D,ECT2,STIL,POU2F1,CBX5,HSPA5,UBE2C,HMGA1,HMGA2,ARHGAP24,SYT7,BMP4,IFT20,EFNA3,DIAPH3,NASP,CPS1,UBE2T,DNAJC10,MXD4,HMGB2,CHTF18,LMNB1,ADGRE5,NETO1,MYBL2,TOPBP1,MYBL1,POLE,CFAP45,HIST1H1C,CKAP2,TBC1D8,AXIN2,MASTL,GPCPD1,ETV4,CCNA2,FGR,RBL1,VGF,RASA4,DOCK2,USP18,AURKB,AURKA,DLL3,CHSY1,SV2A,POLD1,NT5DC2,POLD2,LRIG1,KLRG2,HES1,PDE6A,BUB1,RRM1,RRM2,TICRR,FMNL2,PIK3IP1,SNTB1","14","62.67","Cluster 1","Mybl2","false","false","Cluster 3","Clustered","7.813186813186814","Clustered","9.428571428571429","ENSMUSG00000017861"
"2187","","",,,"Cluster 1","Bcl2l11","false","false","Cluster 3","Clustered","7.912087912087912","Clustered","9.67032967032967","ENSMUSG00000027381"
"2183","","",,,"Cluster 2","Cyp2b10","false","false","Cluster 3","Clustered","7.644444444444445","Clustered","8.181818181818182","ENSMUSG00000030483"
"2179","ARCHS4 Coexpression,627;Enrichr Queries,970;ReMap ChIP-seq,265;GTEx Coexpression,633","IFITM3,DSCC1,RORA,NR3C1,MKI67,SOGA1,ETS1,IFIT3,IFIT2,IGF1R,ARHGAP40,CCND1,MYC,DPYSL2,CHEK2,MYB,STMN1,CHEK1,TNFSF10,CAPN2,PIM2,PDE8A,TLE2,MBNL1,RBFOX3,DNAAF3,ADPRHL1,VASH2,ARID5B,MITF,MYT1,MSH6,TIAM1,ACAP3,MSH2,RAB37,MAP1B,DNA2,SQSTM1,INTS6L,GRID2IP,NOTCH2,BLM,NOTCH1,NPR1,CACNA1A,ITPR2,ZFP36L2,NEUROD1,NEUROD2,CCNB2,BCL2L11,PODXL,MAP6,NPTX1,CLSPN,MYH10,MDN1,PRNP,STIL,FZD3,PLK5,CARMIL3,POU2F1,CBX5,FZD7,OSBPL2,SLC33A1,HMGA1,RAB27A,NFATC2,KLHL23,TRERF1,PALB2,XKR7,MOV10,FA2H,DAP,CDK6,NASP,UBE2T,DMXL2,LRRN1,SERPINI1,PAM,MAP3K12,ITM2C,BTG2,KCNC1,MCM8,NCAN,TGFB1I1,CELF2,PZP,ZC3H6,CTDSPL2,BRCA1,SYNE1,LMNB1,MMP24,C1QTNF1,MCF2L,TRIM3,ANXA6,TRIM67,BCAS1,HIST1H1C,TEAD4,NDC1,HELLS,KLF12,PRMT2,DST,ROM1,CKAP2,ETV1,PAX6,FAM219A,SLC35G2,NAV1,KCNAB3,IL17RD,RHOC,ETV6,DNAJC3,ADGRF1,MMP17,CKS2,LCOR,KIF2C,DTL,PRPS2,CRP,CD63,PHLPP1,ACSS2,GREB1L,NLRC3,NPL,AURKB,ADCY5,CECR2,ABLIM1,SV2A,LRIG1,DNAJB9,GCNT3,METTL7B,GABRD,RUNX1T1,GINS1,GDF11,SLC16A1,ATAD5,KLHL3,FBXL16,SUOX,KLF4,STXBP5L,BAIAP3,TICRR,RIT1,CENPF,TSPAN13,KBTBD6,GSTA4,ABI2,SYT11,PRC1,NFIB,FKBP1B,ALMS1,CFAP36,CACHD1,TRIM37,VIM,CBLN3,CCL28,FRYL","689","623.8","Cluster 2","Pou2f1","false","false","Cluster 3","Clustered","7.826086956521739","Clustered","7.826086956521739","ENSMUSG00000026565"
"2178","","",,,"Cluster 1","Lmnb1","false","false","Cluster 3","Seed","9.230769230769232","Clustered","9.79120879120879","ENSMUSG00000024590"
"1665","","",,,"Cluster 3","Sst","false","false","Cluster 3","Clustered","7.7142857142857135","Clustered","10.694444444444445","ENSMUSG00000004366"
"2177","","",,,"Cluster 1","Notch1","false","false","Cluster 3","Clustered","8.192307692307692","Clustered","9.636363636363637","ENSMUSG00000026923"
"1149","","",,,"Cluster 1","Msh2","false","false","Cluster 3","Clustered","8.0","Clustered","9.0","ENSMUSG00000024151"
"1659","","",,,"Cluster 1","Gip","false","false","Cluster 3","Clustered","8.0","Clustered","8.6","ENSMUSG00000014351"
"1658","","",,,"Cluster 1","Cd40","false","false","Cluster 3","Clustered","7.418181818181818","Clustered","10.0","ENSMUSG00000017652"
"2169","","",,,"Cluster 1","Cdk1","false","false","Cluster 3","Clustered","8.318181818181818","Clustered","8.351648351648352","ENSMUSG00000019942"
"1142","","",,,"Cluster 1","Notch3","false","false","Cluster 3","Clustered","8.192307692307692","Clustered","9.636363636363637","ENSMUSG00000038146"
"2164","","",,,"Cluster 3","Rpa2","false","false","Cluster 3","Clustered","8.318181818181818","Clustered","10.694444444444445","ENSMUSG00000028884"
"2162","","",,,"Cluster 1","Dapk2","false","false","Cluster 3","Clustered","7.5636363636363635","Clustered","9.454545454545455","ENSMUSG00000032380"
"2161","","",,,"Cluster 1","Ccnb1","false","false","Cluster 3","Clustered","7.418181818181818","Clustered","9.444444444444445","ENSMUSG00000041431"
"1136","","",,,"Cluster 1","Golga7b","false","false","Cluster 3","Clustered","8.0","Clustered","8.6","ENSMUSG00000042532"
"2158","ARCHS4 Coexpression,1240;Enrichr Queries,342;ReMap ChIP-seq,138;GTEx Coexpression,629","IFITM3,ANKRD35,IRS1,TRIL,ZC3HAV1L,CWH43,NR3C1,CLDN1,ETS1,GIMAP8,SYDE2,CDC20,LGALS3,RGS2,MCIDAS,ZFP30,CCND1,BASP1,RASSF5,MYC,CHEK2,LONP1,DENND5A,LIPK,TNS4,GLUL,TGM2,IER3,TMEM178B,IGFBP4,IGFBP3,DIO1,ARID5B,SLC51A,MAPK8IP2,SDCBP2,OVOL2,SYTL2,RAB30,LMX1A,S100A6,CYP2E1,COL17A1,NOTCH1,SDC4,PLA2G3,APCDD1,DTX4,ZFP36L2,CNN3,ALDH3B2,FAM221A,KLC3,RDH12,PCBP3,INPP5D,IGFBP7,WNT3,ZBTB7C,BARD1,NGFR,PRNP,EGR2,TGFB2,FZD3,FZD7,HMGA2,B3GALT5,POU2F3,PARP12,GADD45G,REEP1,FOSL1,BMP4,CXCL10,EFNA3,CDK6,GJB3,BAMBI,ID4,CDK1,SDC1,AMOTL2,ITM2C,TOP2A,CNTNAP2,NRP1,COL18A1,BTG2,CCDC120,FHL1,KIF14,HMGB2,HSPB1,NRARP,RND3,JPH1,PIK3CG,HERPUD1,TIMP2,TIMP3,PLEKHN1,HGFAC,TNFRSF19,PLAUR,IL17RE,NME5,PARP8,CCNA2,KIF9,GFOD1,IRF1,KIT,CKS2,RHOV,CHST4,C1QA,MAGEH1,SMARCD3,RGS16,THBS1,COCH,NSL1,CLCN1,AURKB,RASSF10,TCEAL1,RNF39,LRIG1,SPTSSB,METTL7B,MSX1,SLIT2,HES5,RRM2,GSN,PLEKHA2,KCNIP3,TPBG,IRX4,KRT10,KLF4,TPD52L1,KBTBD6,GSTA4,FABP5,NFIB,KRT15,AGBL3,CACHD1,ACKR3,FOSB,TRIM37,VIM,CENPP,CDO1","633","587.3","Cluster 1","Hes1","false","false","Cluster 3","Clustered","8.193548387096774","Clustered","9.557575757575759","ENSMUSG00000022528"
"1645","","",,,"Cluster 1","Slc14a2","false","false","Cluster 3","Clustered","9.0","Clustered","9.0","ENSMUSG00000024552"
"2157","Literature ChIP-seq,42;ARCHS4 Coexpression,609;Enrichr Queries,239;ReMap ChIP-seq,285;GTEx Coexpression,884","ENO3,SLC4A4,ELK3,ZC3H12C,PREX1,DPYSL2,MYC,STMN1,DPYSL3,LIPG,CREB3L2,AP1S2,PIP4K2A,IER3,GPR179,CHGB,CUBN,MBNL1,DNAAF3,DAPK1,CACNA2D1,HSPG2,SYTL2,DKK3,ZC2HC1C,EML6,CLPS,MAP1B,LGALS12,TYRO3,PADI2,MYL9,PADI1,ASF1B,LIPT1,SHMT2,AGAP2,ENDOD1,SLCO5A1,ABCB9,PLA2G7,IQGAP3,NCAPH,PRKAR2B,FIGNL1,PDGFC,ADAMTS17,S100A13,CEP72,RHBDL3,ST3GAL1,PPARGC1B,LHPP,ZBTB7C,SLC19A2,GSTM4,MYH7B,PLK5,AFAP1L1,GSDMA,CADM1,SIVA1,FZD7,PLK1,EIF2AK3,NFATC2,RMDN2,FOSL1,GJB2,UCK2,FXYD3,LYPD6B,TNFSF4,CYP1A1,PHF1,JPH1,ARHGAP6,ABCC12,MMP20,LFNG,TUBA1B,FAM102B,CHAF1A,C1QTNF1,FAM102A,MECOM,TMEM44,EFCAB1,TRIM3,TIMP2,TIMP3,GAST,CEP68,APC2,TEAD4,NDC1,KCND3,SLC2A10,MYOF,DENND2A,ROM1,COPZ2,WDR31,SERPINB9,WNT9A,F2,DDB2,CIT,BACE2,GPRC5B,TUBB2A,PLCB4,MMP15,INCENP,KIFC1,ANGPTL6,CDC42EP3,MMP17,ADSSL1,CKS2,KIFC3,SMTNL2,GAS6,PLCB1,GART,MGLL,SLC29A2,NBAS,PHLPP1,PKN3,PRUNE2,PELI2,COL11A2,FAM129A,SEZ6,SNX32,SNX33,CENPA,TMEM163,SLC7A2,FGD1,FSTL4,PTGS1,UNG,TMEM71,USP1,RUNX1T1,EGLN1,LRRC26,GSN,CDKN2C,SLC16A1,GK,KCNB1,LAPTM5,GPR4,TUBB4A,AGT,RFLNA,STXBP5L,TTLL7,SPSB2,CENPH,NFIB,FABP6,YPEL1,FOSB,CENPM,COQ8A,CENPP,YPEL3,FRYL,SEMA5A,RAB3C,NRROS,OLFML2B,CHRM1,RASL11B,ANKRD35,GPR68,NCF2,TUSC3,IRS1,PROS1,GMNN,RORA,FRY,CXCL13,SLC8A1,GRB10,TNFRSF8,CEP250,PLXNC1,PIM2,SH2D6,LZTS1,SH2D5,STK32B,PHLDA3,EPM2A,KCNH3,MYLIP,RNF43,MREG,IGFBP3,ZBTB38,ANKRD44,FRMD4A,MITF,MYT1,TLE6,MSH6,ACAP3,RAB30,OBSCN,MSH2,MAL,SQSTM1,SEMA7A,BLM,BRSK2,CPB2,KHDRBS3,NOTCH1,GMPR,ITPR2,AK7,RAP1GAP,RHOBTB1,GOLGA7B,ITPRIPL1,FGGY,IGFBP7,SRGAP1,RAB6B,DRD3,PLXNA4,MDN1,FN3K,ANKRD26,SDF2L1,OSBPL5,RBPMS,ATP8B2,RASL10B,ZBTB10,B3GALT5,FBXO32,MCC,CORO2B,PALB2,CXCL10,MFHAS1,CDK6,DMXL2,SPIRE1,MAP3K14,TUBA8,MAP3K12,TRIM72,PIWIL4,PSCA,CELF2,FHL1,RASGRF1,CELF5,NRARP,UNC80,GM2A,SCRN1,EFHD1,TRIM67,BCAS1,SLC36A1,TRIM62,PLEKHG1,DST,GPX3,TNFRSF19,DUSP22,NEMP2,ASPH,ADORA2A,TMBIM4,NEMP1,ASPA,MCM2,ITGA9,CRP,PLEKHH2,NTN4,SRL,MLLT3,CXXC5,CECR2,ABLIM1,P2RY6,SLC25A29,E2F1,RNF39,NHS,E2F8,JAZF1,ANGPT2,KCNJ11,RNF24,NCKAP5L,KCNIP3,SPAG4,IRX4,SYT14,FBXL16,SYT13,KLF4,TTC39A,BAIAP3,NFASC,DNAJA4,CROCC,IMPDH2,TRIM37,TRIM38,MYO1H,CD244,AQP7,LDLRAD3,IFIT3,IFIT2,LGALS3,SYNPR,CHEK2,LONP1,PIEZO1,DPF3,GLUL,SLC12A8,HABP2,EPHA4,ACSL6,ESCO2,MIF,CPT1C,OVOL2,TIAM1,IFI27,RRAGB,KCNQ1,HSBP1L1,RIN3,GSAP,MXRA7,KCTD12,KCTD17,CFTR,NUMBL,EPB42,SDC4,CAPSL,STXBP1,TSHZ2,EIF5A2,C2CD4C,APCDD1,PGBD5,MAP2,NHLH1,FAM43A,HIVEP3,KCNN4,PCK1,RIMKLA,TSPAN1,RAB11FIP4,ATP6V0A1,ZBED3,EGR2,TMEM86A,REG4,SLC35E4,SLC33A1,OSGIN1,RAB27A,FER1L6,DCLK1,POLA1,PM20D2,ANLN,PEX5L,PPP1R1B,PDE3A,SPATS2L,CALR,FBXL2,RGL1,C2CD2L,CD200,ITM2C,NRP1,COL18A1,SUV39H2,NRP2,TENM4,SH3KBP1,PTPRN,ZFAND2A,SUV39H1,GRIK3,ICA1,PTPRM,BRCA1,PCSK4,HERPUD1,LIMD2,SH3PXD2A,XPO4,CTSK,DNER,KIF1A,QSOX2,CTSF,TMED6,LMCD1,CC2D2A,TMED8,TMEM150A,PRMT2,SLC35G2,NME4,GFRA3,CBFA2T3,RENBP,VAV1,ZDHHC14,PARP8,RAD51B,RNF144B,HCK,MN1,CLDN14,PITPNM3,KIT,SYNC,PDZRN3,FJX1,SDCCAG8,CD63,DTYMK,SLC43A3,DERL3,SLC43A1,GREB1L,NEXN,NPL,TYMS,PHYHIP,GNAI1,NT5E,LY6G6F,CAP2,GINS1,GDF11,GABBR2,PLEKHA2,SUSD2,SUSD1,RPA1,FAM189A1,SORBS2,LHFPL2,SORBS3,ALDH4A1,RIT1,TTC8,TPPP3,KLHL5,CSDC2,QPCT,KLHL7,CACHD1,APBA1,TRIP13,RAMP1,SPC24,CD83,GDA,KLHL32,GXYLT2,NR3C1,TMEM140,ETS1,CELSR3,PLB1,IGF1R,CNDP2,SYDE2,SCGN,RGS2,CCND1,CAPN2,PDE8A,TGM2,RGS7,ZBP1,GAS2L3,LIG1,TTC7B,ARID5B,PDIA6,TANC2,PDIA5,DCTD,DKC1,FAM185A,GPRIN1,ADAM12,SIDT1,SCG5,NUPR1,LMX1B,CTTNBP2,HTRA3,SLC41A2,TCF7,CACNA1A,LPL,SLC1A3,FBLN2,ZFP36L2,CACNA1H,CNN3,SYCE2,KCNV2,CCNB1,SCUBE1,SCIN,GRK5,HRH3,NLRP6,KIF3C,MYH10,MFAP3L,PACSIN1,KLHL29,PRNP,TGFB2,CBX5,DENND4B,HMGA1,CRIM1,TRPV3,HMGA2,INHBC,ARHGAP24,ARHGAP23,GNAO1,ISG20,AHI1,SDK1,PYY,EFNA3,GCLC,PLCXD3,FGF14,NR4A3,DLG4,TAF4B,AMOTL2,LRP11,PNLIPRP2,HSPB8,TNFAIP2,HSPB1,YBX2,SOBP,SPRED3,MCF2L,MYBL2,A4GALT,SCARF2,MYBL1,DACT1,KLF12,TGIF2,TBC1D8,ETV1,NAV1,IQCD,MYRIP,MASTL,GPCPD1,ETV4,SPIDR,KLF15,ETV6,FGR,RBL1,VGF,SETBP1,RASA3,RASA4,ALDH1A1,ATP6V1B2,RBM20,GNB1L,DOCK2,RGS17,DDC,RGS14,ASAP3,PKD1L1,RSPH9,PRELP,ADD3,THBS1,AURKB,NCALD,ASB16,AGPAT4,DLL3,RASD2,GNG2,CHSY1,ALDH1B1,GNG4,POLD1,NT5DC2,SPOCK2,POLD2,ATOH8,LRIG1,MAN1C1,SLIT1,KLRG2,SPOCK1,HES1,SLIT2,NCAM2,CHGA,CADPS,ARID3A,ADGRD1,MLPH,FMNL2,PIK3IP1,BCL6B,FAM131A,RGS12,VIM,SNTB1","352","411.8","Cluster 2","Mitf","false","false","Cluster 3","Clustered","7.939784946236559","Clustered","7.939784946236559","ENSMUSG00000035158"
"2155","","",,,"Cluster 1","Nr0b2","false","false","Cluster 3","Clustered","7.565217391304348","Clustered","9.794117647058822","ENSMUSG00000037583"
"1635","ARCHS4 Coexpression,178;Enrichr Queries,171;GTEx Coexpression,566","NRROS,CD83,GFI1,RORA,NR3C1,MKI67,GIMAP6,ETS1,SLC8A1,GIMAP8,IGF1R,LGALS3,PREX1,RGS2,CCND1,DPYSL2,RASSF5,MYC,CHEK2,PLXNC1,TGM2,IER3,ZBP1,MBNL1,SP110,IGFBP4,ANKRD44,IGFBP3,ARID5A,ARID5B,MPEG1,ADAM19,TIAM1,RAB37,MFNG,GSAP,RIN3,KCTD12,CARD11,CSF1R,AKNA,NOTCH1,TCF7,CACNA1A,ZFP36L2,PIK3R5,BCL2L11,GRK2,INPP5D,HIVEP3,PRNP,EGR2,TGFB2,CARMIL2,CADM1,ATP8B2,CRIM1,NBEAL2,FBXO32,ISG20,CXCL10,NR4A3,ITM2C,DENND1C,NRP1,BTG2,SH3KBP1,DOCK8,CELF2,ATP2A3,ITGAL,RCSD1,PIK3CG,LIMD2,SYNE1,SPN,PSTPIP1,DUSP10,FAM102A,ADGRE5,SH3PXD2A,TIMP3,ITGB7,EMB,CD53,CAMK1D,ITGA4,DST,MYOF,PLAUR,NAV1,PARP8,APBB1IP,RASA3,MDFIC,IRF1,KIT,KCNMA1,DOCK2,HCST,PLCB2,MGLL,RGS16,CCDC69,FAM129A,NLRC3,THBS1,AURKB,FAM117A,FGD2,PTGS1,ABLIM1,SH3BP1,SPOCK2,LRIG1,GSN,PLEKHA2,GPR55,LAPTM5,KLF4,SORL1,FMNL1,FOSB,VIM,TRIM38,CD244","215","305.0","Cluster 2","Nfatc2","false","false","Cluster 3","Clustered","7.908496732026143","Clustered","7.908496732026143","ENSMUSG00000027544"
"2146","","",,,"Cluster 1","Tiam1","false","false","Cluster 3","Clustered","8.0","Clustered","10.0","ENSMUSG00000002489"
"2142","","",,,"Cluster 3","Adgre5","false","false","Cluster 3","Clustered","9.0","Clustered","10.694444444444445","ENSMUSG00000002885"
"2141","","",,,"Cluster 3","Prkar2b","false","false","Cluster 3","Clustered","9.0","Clustered","10.694444444444445","ENSMUSG00000002997"
"2135","ARCHS4 Coexpression,44;Enrichr Queries,97;ReMap ChIP-seq,243;GTEx Coexpression,130","STMN3,LDLRAD3,AQP4,NOC2L,SOGA1,ENO3,SAMD14,RINL,CREB3L4,DPYSL2,MYC,CHEK2,DPYSL3,LONP1,PIEZO1,HOXA4,IER3,TMEM88B,EPHA4,EPHA7,RBFOX3,CACNA2D1,SYTL1,MAPK8IP1,CLDN6,TIAM1,CLDN9,MAP1B,MAP1A,MXRA7,KCTD12,HOXB8,LIPT1,MAGED1,STXBP1,AGAP2,CRACR2B,MAP2,PDGFC,ST3GAL1,FZD3,PLK5,CARMIL3,DTNA,SPHKAP,CADM1,DCLK1,FOSL1,PKIB,XKR7,KLHDC8A,PPP1R1B,ID4,FXYD6,LRRN1,SERPINI1,CDK14,C2CD2L,ITM2C,TOP2A,NRP1,PTPRR,TMEM151B,KCNC1,NCAN,DIRAS2,GRIK3,PCSK4,JPH4,TUBA1B,MMP24,KCNT1,PCLO,SLC22A17,TRIM3,DNER,TIMP2,TIMP3,FFAR2,PLEKHN1,KIF1A,PSD,CD53,ELOVL2,ROM1,PAX6,MANEAL,PROX1,SYP,RHOC,RENBP,SYN1,CNKSR2,B3GNT9,GPRC5B,PLCB4,MMP16,MMP15,KIT,KCNMA1,PLCB1,GART,VAMP2,MGLL,CD63,PHLPP1,SLC43A1,PRUNE2,SNX33,PHYHIP,GNAI1,PSMC3IP,NT5E,CARNS1,APBB1,GABRD,RUNX1T1,LRRC26,CDKN2C,SYVN1,LAPTM5,KLHL3,SORBS2,PNMA2,TUBB4A,STXBP5L,ABI2,NFIB,KRT15,SMOC1,FOSB,SPC24,SEMA5A,CHPF,PROS1,RORA,NR3C1,ETS1,CELSR3,SLC8A1,RGS4,RGS2,CCND1,CDH2,KIF5C,BASP1,TGM2,TLE2,IGFBP4,IGFBP3,TMOD2,APLP1,ARID5B,MYT1,TLE6,DISP2,PLA2G15,CLIP3,ACAP3,SLC9A5,RAB37,ANKS6,SCG3,SQSTM1,RTN2,BRSK1,NDRG4,BRSK2,RNF180,CACNA1B,CACNA1A,SLC1A3,NREP,CPLX2,PKMYT1,NEUROD1,SLC9A3R2,IGSF21,NEUROD2,GRK2,NPTX1,KIF3C,RAB6B,PRNP,TGFB2,SDF2L1,DENND4B,SYT1,BDNF,CRIM1,HMGA2,ISG15,SSC5D,CORO2B,BMP4,GNAO1,CXCL10,CDK6,DLG4,BAMBI,REEP2,SP6,CPE,CSPG5,MAP3K12,SNAP25,RASGRF1,YBX2,RND3,SYNE1,UNC80,PIDD1,DUSP10,SCRN1,MCF2L,EMILIN1,TRIM67,PIANP,DST,TNFRSF19,PPP2R5B,ETV1,OLIG1,IQCD,KCNAB3,ETV4,SSTR5,CCNA2,SAPCD2,VGF,IRF1,NEMP1,DCTPP1,CAMK2B,ACSS2,LAMA4,THBS1,AURKB,ABLIM1,GNG2,SH3BP1,SV2A,SPOCK2,LRIG1,SPOCK1,HES1,SLIT2,PCDHGC4,ARID3A,FBXL16,KLF4,BAIAP3,NFASC,FMNL2,SYT11,BCL6B,RGS12,VIM,CBLN3","56","128.5","Cluster 1","Etv1","false","false","Cluster 3","Clustered","8.672727272727272","Clustered","10.166666666666666","ENSMUSG00000004151"
"2133","","",,,"Cluster 1","Msh6","false","false","Cluster 3","Clustered","8.307692307692308","Clustered","10.153846153846155","ENSMUSG00000005370"
"2132","","",,,"Cluster 1","Mcm5","false","false","Cluster 3","Clustered","8.192307692307692","Clustered","9.428571428571429","ENSMUSG00000005410"
"2131","","",,,"Cluster 1","Igf1r","false","false","Cluster 3","Clustered","8.952380952380953","Clustered","10.299999999999999","ENSMUSG00000005533"
"1617","","",,,"Cluster 1","BC030867","false","false","Cluster 3","Clustered","9.12087912087912","Clustered","10.0","ENSMUSG00000034773"
"2127","","",,,"Cluster 1","Ttc25","false","false","Cluster 3","Clustered","7.457142857142857","Clustered","9.73076923076923","ENSMUSG00000006784"
"589","","",,,"Cluster 1","B4galnt4","false","false","Cluster 3","Clustered","8.0","Clustered","9.0","ENSMUSG00000055629"
"1610","","",,,"Cluster 1","Trim67","false","false","Cluster 3","Clustered","7.418181818181818","Clustered","8.345454545454546","ENSMUSG00000036913"
"2120","","",,,"Cluster 1","Kif11","false","false","Cluster 3","Clustered","8.0","Clustered","10.0","ENSMUSG00000012443"
"1608","","",,,"Cluster 1","Cdkn1c","false","false","Cluster 3","Clustered","8.318181818181818","Clustered","9.454545454545455","ENSMUSG00000037664"
"2118","","",,,"Cluster 1","Plekho1","false","false","Cluster 3","Clustered","8.454545454545455","Clustered","9.393939393939394","ENSMUSG00000015745"
"1606","","",,,"Cluster 3","Spsb2","false","false","Cluster 3","Clustered","8.014705882352942","Clustered","11.076923076923077","ENSMUSG00000038451"
"2116","","",,,"Cluster 3","Dyrk3","false","false","Cluster 3","Clustered","9.0","Clustered","10.694444444444445","ENSMUSG00000016526"
"2114","","",,,"Cluster 1","C1qtnf1","false","false","Cluster 3","Clustered","8.318181818181818","Clustered","8.717948717948719","ENSMUSG00000017446"
"577","","",,,"Cluster 1","Fxyd3","false","false","Cluster 3","Clustered","7.644444444444445","Clustered","8.6","ENSMUSG00000057092"
"2113","","",,,"Cluster 3","Timp2","false","false","Cluster 3","Clustered","8.010989010989011","Clustered","11.076923076923077","ENSMUSG00000017466"
"1599","","",,,"Cluster 2","Adora1","false","false","Cluster 3","Clustered","8.0","Clustered","7.384615384615384","ENSMUSG00000042429"
"574","","",,,"Cluster 1","Whsc1","false","false","Cluster 3","Clustered","8.454545454545455","Clustered","10.166666666666666","ENSMUSG00000057406"
"1596","","",,,"Cluster 1","Rbm20","false","false","Cluster 3","Clustered","8.836363636363636","Clustered","9.871794871794872","ENSMUSG00000043639"
"2108","","",,,"Cluster 1","Slc25a35","false","false","Cluster 3","Clustered","8.076923076923077","Clustered","9.871794871794872","ENSMUSG00000018740"
"2107","","",,,"Cluster 1","Rab3d","false","false","Cluster 3","Clustered","8.454545454545455","Clustered","9.636363636363637","ENSMUSG00000019066"
"1083","","",,,"Cluster 1","Gsdma","false","false","Cluster 3","Clustered","8.0","Clustered","8.6","ENSMUSG00000017204"
"2106","","",,,"Cluster 1","Atp6v0a1","false","false","Cluster 3","Clustered","7.813186813186814","Clustered","9.73076923076923","ENSMUSG00000019302"
"2104","ARCHS4 Coexpression,1093;ENCODE ChIP-seq,97;Enrichr Queries,529;ReMap ChIP-seq,230;GTEx Coexpression,713","IFITM3,SLC46A3,MDC1,ANKLE1,ACSM3,LRR1,GDE1,GCC2,MKI67,ENO3,LGALS3,RPS6KA6,RINL,CREB3L4,MYC,DPYSL2,CHEK2,LIPH,CREB3L2,MYB,LONP1,PIEZO1,IER3,MBNL1,SP110,IL1R1,RNASE4,CPT1C,MAPK8IP1,CLDN6,CLDN9,TFR2,HOXB4,HOXB3,RIN3,HOXB2,MXRA7,HOXB8,PRR11,LIPT1,SDC4,GIPR,ENDOD1,MGST2,SLC5A3,PIK3R5,STRIP2,INPP5D,FIGNL1,ST8SIA4,S100A13,PCK1,ST3GAL2,PPARGC1B,EGR2,TMEM184C,XRCC2,PMM2,NBEAL2,ABCA7,PYCR2,CDC6,GADD45G,FOSL1,TPX2,ANLN,CALR,ITM2C,ATR,COL18A1,BTG2,ECM1,TMEM151B,NCAPG2,ATF7IP2,PTPRM,BRCA1,KIF11,LIMD2,HERPUD1,KIF15,JPH4,LFNG,SH3PXD2A,TMEM44,NUF2,TIMP2,ANXA6,CD53,PSD,CEP68,RMI2,TMED8,ACTL6B,MYOF,KIF24,KIF23,SERPINB9,IL17RE,RHOC,VAV1,APBB1IP,RAD51B,HCK,KIF9,TUBB2A,ANGPTL6,CDC42EP3,TLR6,VAMP2,PLPPR2,SLC43A2,PKN3,PRIM1,SEZ6,RHD,PSMC3IP,TCEAL8,SLC17A9,ALOX5,RAD54L,LY6G6F,GSN,CDKN2C,SLC16A1,GINS3,LAPTM5,SYVN1,RRP1B,KRT10,FMO5,TMCO3,ALDH4A1,TTLL7,GFI1B,KBTBD6,CCDC8,KLHL7,CENPM,FOSB,CENPN,YPEL3,FRYL,FOXA3,SPC24,NRROS,CHPF,NCF2,ZWILCH,RAB3D,RORA,NR3C1,ETS1,IGF1R,SLC25A48,RGS2,CCND1,BASP1,CAPN2,PLXNC1,PIM2,PDE8A,TGM2,ANKRD44,NPY1R,ARID5B,CDC25C,RUNDC3A,ADAM19,TPST1,PROCR,RAB30,MELK,MSH2,TEX9,HAT1,GEMIN5,SQSTM1,CARD11,INTS6L,RTN2,DNMT1,SEMA7A,NOTCH1,HVCN1,UBA5,TROAP,GPR85,FBXO48,CACNA1A,PKMYT1,ZFP36L2,NEUROD2,TMEM245,SCUBE1,SCIN,BAG2,PGK1,WNT3,FANCI,PRNP,STIL,SDF2L1,POU2F1,CBX5,DENND4B,HMGA1,HMGA2,ISG15,PALB2,ISG20,CXCL10,EFNA3,GCLC,CDK6,DIAPH3,GGCX,DLG4,CNIH2,MAP3K14,PLEKHM3,TRIM72,TNFAIP2,HMGB2,HSPB1,LRMP,DUSP18,PIK3CG,LMNB1,SPN,NADK2,PSTPIP1,DUSP10,EFHD1,EMILIN1,CEP170,HIST1H1C,SMIM14,RFC3,EGFL7,TNFRSF19,PLAUR,PPP2R5B,IQCD,GPCPD1,SYNGR4,SPIDR,GIP,FGR,CREB3,NEMP2,ESPL1,VGF,GFOD1,IRF1,IRF7,BIRC5,ANG,GNB1L,ITGA5,MCM6,MCTP2,DOCK2,DCTPP1,HEMGN,SMARCD3,RGS16,CXXC5,THBS1,AURKB,CECR2,PDE11A,ALDH1B1,LRIG1,HES1,WASF1,E2F7,CYB5A,GALNT5,RRM2,RNF24,QPCTL,PLCL1,ARID3A,SYT14,FBXL16,KLF4,TPD52L1,FMNL1,BCL6B,TRIM37,VIM,UNC79","555","532.4","Cluster 1","Arid3a","false","false","Cluster 3","Clustered","7.813186813186814","Clustered","9.871794871794872","ENSMUSG00000019564"
"2103","","",,,"Cluster 1","Fbxo5","false","false","Cluster 3","Clustered","7.7142857142857135","Clustered","10.0","ENSMUSG00000019773"
"2100","ARCHS4 Coexpression,968;Enrichr Queries,691;GTEx Coexpression,1118","IFITM3,NRP1,BTG2,IRS1,FHL1,HSPB1,RORA,GXYLT2,NR3C1,JPH1,ETS1,RND3,TMEM263,IGF1R,SYNE1,LMNB1,LGALS3,RGS2,CHAF1A,DUSP10,CCND1,DPYSL2,MYC,CREB3L2,TIMP2,LONP1,TIMP3,MYBL2,GLUL,TGM2,IER3,MYLIP,MBNL1,CLUH,DST,IL1R1,ZBTB38,IGFBP3,MYOF,COPZ2,MITF,PUS7,DNAJC3,RASA4,INCENP,KIFC1,IRF1,HAT1,CDC42EP3,GEMIN5,KDELR3,SYNC,SMTNL2,SDC4,FAM114A1,EIF5A2,FAM129A,TNFRSF11B,FAM214A,THBS1,AURKB,ZFP36L2,ABLIM1,POLD1,PDGFC,LRIG1,E2F1,ST3GAL1,SRGAP1,SLC19A2,EGLN1,PRNP,EGR2,GSN,CRIM1,FBXO32,KLF4,SORL1,PM20D2,CXCL10,RIT1,CDK6,NFIB,FOSB,VIM,ULBP1,ITM2C","1105","925.7","Cluster 1","Arid5b","false","false","Cluster 3","Clustered","7.813186813186814","Clustered","9.428571428571429","ENSMUSG00000019947"
"2099","Literature ChIP-seq,59;ARCHS4 Coexpression,196;ENCODE ChIP-seq,42;Enrichr Queries,20;ReMap ChIP-seq,26;GTEx Coexpression,229","STMN3,MRGPRE,ENO3,SMC4,SMC2,SPIB,MILR1,PREX1,SAMD14,CREB3L4,LIPH,DPYSL2,MYC,MYB,STMN1,IER3,MBNL1,CLDN4,TFR2,CLDN8,ASF1B,CDCA3,SHMT2,CDCA7,NCAPG,NCAPH,CRACR2B,ST3GAL1,PLK4,GPR17,GSTM1,PLK1,ABCA7,CDC7,CDC6,FOSL1,UCK2,FXYD3,FXYD2,LYPD6B,BTG2,NCAPG2,RCSD1,VSIR,LFNG,FAM102B,FAM102A,CHAF1A,NUF2,PBK,SH3BGRL3,TK1,EMB,CEP55,HELLS,RMI2,LEFTY1,TPSG1,ROM1,PAX4,F2,CIT,APBB1IP,BACE1,RIPPLY3,TUBB2A,KIFC1,ANGPTL6,CDC42EP3,CKS2,ADSSL1,HCST,VAMP2,MGLL,SLC29A2,PLPPR2,SNX32,CENPA,UNG,PTGS1,FAM117A,FGD2,PRSS50,SLC17A9,CARNS1,GCNT3,EGLN1,CENPU,CDKN2C,GSN,ATAD5,ATAD2,LAPTM5,FMO5,CENPE,CENPF,CENPM,FOSB,CENPP,FRYL,NUCB2,CDKN3,BRDT,NRROS,SH2D7,OLFML2B,GPR68,NCF2,RAB3D,GMNN,CEP128,TNFRSF8,PIM2,IL13RA1,KCNH2,RNF43,MREG,IGFBP4,IGFBP3,VRK1,MITF,TLE6,MSH6,MELK,RAB37,MFNG,MAL,SQSTM1,SEMA7A,BLM,DNMT1,NOTCH1,ILDR1,TNFRSF11A,RAP1GAP,RAD51AP1,GOLGA7B,BCL2L11,ORC1,CLCA1,MDN1,FANCI,SDF2L1,OSBPL2,B3GALT5,CXCL10,CDK6,CDK1,CNIH2,CDCA7L,CELF2,NRARP,MCM10,ITGAL,FOXM1,PIK3CG,SPN,PSTPIP1,HHEX,DUSP10,GM2A,EXO1,ITGB7,GAL3ST2,RFC3,RFC4,ITGA4,SH2D3C,ASPM,ESPL1,IMPAD1,MCM3,PECAM1,MCM4,BIRC5,MCM5,MCM6,ITGA5,NEMP1,DCTPP1,DTL,UHRF1,CCDC69,TTK,CXXC5,SH3BP1,E2F1,DNAJB9,E2F7,E2F8,SEC11C,JAZF1,CYB5A,DUT,FBXL16,KLF4,RAD51,P2RX4,PRC1,IMPDH2,SPAG1,PABPC1L,TRIM31,IFITM3,ACSM3,GFI1,SLC35B1,CCNF,AQP9,MKI67,CDC20,LGALS3,RINL,CHEK2,SPATA24,CHEK1,TNFSF10,LONP1,PIEZO1,FBXO5,TNS4,FBXO9,PDK1,RSAD2,KNL1,CPT1C,PLPP5,KCNQ1,ZG16,KCTD12,STXBP1,MGST2,RACGAP1,INPP5D,STC2,ST8SIA4,ST8SIA6,KCNN4,TSPAN1,ZBED3,EGR2,CARMIL2,XRCC2,RAB27A,NBEAL2,GNG13,TPX2,ANLN,CALR,RGL1,C2CD2L,ITM2C,TOP2A,TMEM151B,SH3KBP1,KIF14,BRCA1,KIF11,KRT20,BRCA2,HERPUD1,KIF15,GLIPR1,MIS18BP1,CTSK,STBD1,QSOX1,PSD,IZUMO4,KIF23,KIF22,CBFA2T3,RENBP,VAV1,PARP8,RAD51B,B3GNT6,KIT,KIF2C,DBN1,SDCCAG8,DTYMK,PCNA,PRIM1,HDC,TYMS,RAD54B,NT5E,RAD54L,MPZL2,GINS1,IL33,PLEKHA2,LHFPL2,RIT1,GFI1B,TRIP13,RAMP1,SPC24,MAD2L1,FOXA1,BUB1B,TTF2,NR3C1,ETS1,IGF1R,RGS2,ARHGAP40,CCND1,PALM,CAPN2,ZBP1,LIG1,CD93,ARID5A,ARID5B,KCTD1,PLA2G15,ERN2,SELENOM,CCNE2,ABCG1,EMID1,RTN2,AKNA,UBA5,TCF7,DTX4,FBLN2,ZFP36L2,FUT4,SYCE2,CCNB2,CCNB1,GRK2,GRK5,NLRP6,CLSPN,ECT2,MFAP3L,PRNP,STIL,DENND4B,UBE2C,VDR,HMGA1,ISG15,ARHGAP24,PYY,EFNA3,NR4A3,NASP,DLG4,FES,UBE2T,DNAJC10,TNFAIP8,DOCK8,HMGB2,TNFAIP2,ATP2A3,YBX2,RND3,LMNB1,PIDD1,MFSD6,ADGRE5,MCF2L,MYBL2,TOPBP1,MYBL1,POLE,EGFL7,URAD,PLAUR,NAV1,IQCD,SSTR3,ETV6,FGR,CCNA2,RASA3,IRF1,DOCK2,ATP2C2,THBS1,AURKB,AURKA,NWD1,MUC2,RASD1,CHSY1,POLD1,NT5DC2,LRIG1,HES1,NCAM2,BUB1,ATOH1,R3HDML,RRM1,RRM2,ARID3A,SLC4A8,FAM167A,FMNL1,PIK3IP1,XPNPEP2,BCL6B,ALOX5AP,VIM","33","95.33","Cluster 1","Myb","false","false","Cluster 3","Clustered","9.0","Clustered","9.0","ENSMUSG00000019982"
"1075","","",,,"Cluster 1","Wnt9b","false","false","Cluster 3","Clustered","8.50909090909091","Clustered","8.93939393939394","ENSMUSG00000018486"
"2098","","",,,"Cluster 1","Ahi1","false","false","Cluster 3","Clustered","9.0","Clustered","9.454545454545455","ENSMUSG00000019986"
"2097","","",,,"Cluster 1","Tcp11l2","false","false","Cluster 3","Clustered","8.076923076923077","Clustered","9.871794871794872","ENSMUSG00000020034"
"2096","Literature ChIP-seq,21;ARCHS4 Coexpression,3;Enrichr Queries,4;ReMap ChIP-seq,31;GTEx Coexpression,8","MDC1,LRR1,CCNF,MKI67,SMC4,ENO3,IFIT3,SMC2,CDC20,RINL,MCIDAS,CREB3L1,DPYSL2,MYC,CHEK2,CHEK1,CREB3L2,MYB,STMN1,FBXO5,SKP2,GTSE1,HOXA4,TIPIN,IL1R1,CTRB1,ESCO2,P3H3,KNL1,CPT1C,KNSTRN,WDR76,CLDN6,GPR162,NEIL3,CLDN9,MAP1A,HOXB4,HOXB3,HOXB2,DNA2,MXRA7,KIF20B,HOXB8,PRR11,MYL9,ASF1B,PIF1,SDC4,FICD,CDCA3,CDCA7,AGAP2,NCAPG,SKA3,IQGAP3,NCAPH,SKA1,DSN1,CRACR2B,RACGAP1,FIGNL1,STC2,ST3GAL2,B4GALNT4,PLK4,BARD1,DDIAS,XRCC2,SLC35E4,PLK1,CDC7,CDC6,FOSL1,TPX2,MOV10,POLA1,ANLN,FAT4,TOP2A,BTG2,TMEM151B,PTPRN,NCAPG2,KIF14,BRCA1,KIF11,BRCA2,KIF15,CHAF1B,TUBA1B,TUBA1A,CHAF1A,MIS18BP1,NUF2,PBK,TK1,CEP55,NDC1,TCF19,HELLS,RMI2,MYOF,KIF24,KIF23,KIF22,RHOC,CIT,TUBB2A,KIFC1,INCENP,CKS2,KIF2C,SYNC,GAS6,FJX1,GART,VAMP2,DBN1,CD63,PCNA,PLPPR2,PRIM1,TYMS,CENPA,RAD54B,UNG,NT5E,CAMK2N1,USP1,RAD54L,GINS1,GDF11,CENPU,CASP8AP2,CDKN2C,ATAD5,ATAD2,GPR55,RRP1B,CENPE,CENPF,MIS18A,CENPH,CENPI,CENPM,FOSB,CENPN,AUNIP,TRIP13,SPC24,MAD2L1,CDKN3,ERCC6L,IRS1,ZWILCH,DSCC1,RAB3D,GMNN,RTKN2,BUB1B,TTF2,CCND1,CAPN2,TNFRSF8,KNTC1,PHLDA3,GEN1,GAS2L3,LIG1,ZGRF1,VRK1,CDC25C,TRAIP,DISP2,CLIP3,MSH6,MELK,CCNE2,MSH2,TEX9,MFNG,S100A6,SQSTM1,RTN2,DNMT1,SEMA7A,BLM,NOTCH1,HTRA3,TROAP,PKMYT1,ZFP36L2,RAD51AP1,CCNB2,CCNB1,ORC1,CLSPN,ECT2,FAM83D,FANCI,CCDC18,STIL,CBX5,HSPA5,UBE2C,ARHGEF39,HMGA1,HMGA2,SSC5D,FANCB,CXCL10,DIAPH3,BFSP1,CDK6,GGCX,DLG4,UBE2T,REEP2,CDK1,AMOTL2,MCM8,CDCA7L,HMGB2,TNFAIP2,HSPB1,MCM10,CTDSPL2,FOXM1,SYNE4,CHTF18,LMNB1,SPRED3,PIDD1,DUSP10,EXO1,MYBL2,ITGB7,EMILIN1,SPDL1,TOPBP1,MYBL1,POLE,HIST1H1C,RFC5,RFC3,TRIM62,RFC4,PIANP,TGIF2,ITGA4,SH2D3C,CKAP2,PPP2R5B,PLAUR,MASTL,GIP,CCNA2,MMS22L,ASPM,RCN1,RBL1,DBF4,RASA3,VGF,ESPL1,SAPCD2,MCM3,MCM4,BIRC5,MCM5,TRIM59,MCM6,MTFR2,ITGA5,SPACA6,NEMP1,DTL,ST6GALNAC4,MCM2,UHRF1,TTK,THBS1,AURKB,AURKA,POLD1,NT5DC2,LRIG1,E2F1,BUB1,E2F8,RRM1,DUT,RRM2,SPAG5,AHNAK2,MND1,ARID3A,FBXL16,TICRR,RAD51,PRC1,VIM","4","13.4","Cluster 1","E2f7","false","false","Cluster 3","Clustered","8.454545454545455","Clustered","10.166666666666666","ENSMUSG00000020185"
"2095","","",,,"Cluster 1","Prmt2","false","false","Cluster 3","Clustered","8.0","Clustered","9.0","ENSMUSG00000020230"
"1580","","",,,"Cluster 1","Gda","false","false","Cluster 3","Clustered","7.822222222222222","Clustered","9.272727272727273","ENSMUSG00000058624"
"2090","","",,,"Cluster 2","Tspan13","false","false","Cluster 3","Clustered","7.822222222222222","Clustered","7.636363636363637","ENSMUSG00000020577"
"1577","","",,,"Cluster 1","Tcp11","false","false","Cluster 3","Clustered","8.318181818181818","Clustered","9.09090909090909","ENSMUSG00000062859"
"2088","","",,,"Cluster 1","Kif3c","false","false","Cluster 3","Clustered","8.0","Clustered","10.0","ENSMUSG00000020668"
"2087","","",,,"Cluster 1","Tcam1","false","false","Cluster 3","Clustered","8.454545454545455","Clustered","9.871794871794872","ENSMUSG00000020712"
"2086","","",,,"Cluster 1","Cluh","false","false","Cluster 3","Clustered","7.542857142857143","Clustered","9.21904761904762","ENSMUSG00000020741"
"2081","","",,,"Cluster 1","Aurkb","false","false","Cluster 3","Clustered","7.813186813186814","Clustered","9.871794871794872","ENSMUSG00000020897"
"2077","ARCHS4 Coexpression,620;Enrichr Queries,123;GTEx Coexpression,910","SEMA5A,RORA,FRY,ENO3,ETS1,SLC4A4,SLC8A1,PREX1,CCND1,DPYSL2,CREB3L1,DPYSL3,TMEM38A,PLXNC1,EPM2A,SEMA6C,EPHA4,ADPRHL1,IGFBP3,CACNA2D1,SHISA4,FRMD4A,OBSCN,ADAM12,LGALS12,KCTD12,RTN2,PFKFB1,KHDRBS3,GLIS3,GPR85,GMPR,CACNA1A,SLC1A3,CACNA1C,TRPM2,SCUBE1,PODXL,ST3GAL1,PLXNA4,PRNP,MYH7B,TGFB2,DTNA,CADM1,NEBL,ESRRG,FBXO32,CORO2B,ARHGAP24,REEP1,SDK1,CXCL10,CDK6,NR4A3,PKIA,TUBA8,ITM2C,CDKN1C,TRIM72,NRP1,BTG2,TENM4,FHL1,PTPRM,JPH1,SYNE1,DUSP10,MECOM,TIMP3,APOBEC2,DST,TNFRSF19,MYOF,GFRA1,PROX1,SPTB,MN1,SETBP1,KIT,KCNMA1,ADSSL1,SMTNL2,PDZRN3,MGLL,SLC29A2,CAMK2B,HCN4,SMPX,NEXN,SRL,THBS1,THSD4,AURKB,NCALD,CLCN1,ASB16,RHD,CECR2,ABLIM1,NT5E,SLIT1,LRIG1,SPOCK1,SLIT2,CAP2,RUNX1T1,KCNJ11,SORBS2,PPP2R3A,NFIB,COQ8A","589","551.0","Cluster 1","Dpf3","false","false","Cluster 3","Clustered","7.822222222222222","Clustered","10.0","ENSMUSG00000021221"
"1562","","",,,"Cluster 1","Klhdc8a","false","false","Cluster 3","Clustered","7.615384615384615","Clustered","9.833333333333334","ENSMUSG00000042115"
"2073","","",,,"Cluster 3","Parp8","false","false","Cluster 3","Clustered","9.12087912087912","Clustered","10.945054945054945","ENSMUSG00000021725"
"1557","","",,,"Cluster 1","Zkscan17","false","false","Cluster 3","Clustered","7.822222222222222","Clustered","9.272727272727273","ENSMUSG00000020472"
"1556","","",,,"Cluster 3","Vamp2","false","false","Cluster 3","Clustered","8.307692307692308","Clustered","10.5","ENSMUSG00000020894"
"2066","","",,,"Cluster 1","Dnajc3","false","false","Cluster 3","Clustered","9.010989010989011","Clustered","9.533333333333333","ENSMUSG00000022136"
"2064","","",,,"Cluster 1","Haus4","false","false","Cluster 3","Clustered","9.0","Clustered","10.166666666666666","ENSMUSG00000022177"
"2062","","",,,"Cluster 1","Atad2","false","false","Cluster 3","Clustered","7.813186813186814","Clustered","9.307692307692308","ENSMUSG00000022360"
"2061","","",,,"Cluster 2","Gtse1","false","false","Cluster 3","Clustered","7.466666666666667","Clustered","7.269230769230769","ENSMUSG00000022385"
"2060","","",,,"Cluster 1","Sh3bp1","false","false","Cluster 3","Clustered","9.0","Clustered","10.0","ENSMUSG00000022436"
"2059","","",,,"Cluster 1","Srl","false","false","Cluster 3","Clustered","8.0","Clustered","8.909090909090908","ENSMUSG00000022519"
"2056","","",,,"Cluster 1","Cmss1","false","false","Cluster 3","Clustered","8.836363636363636","Clustered","9.871794871794872","ENSMUSG00000022748"
"1543","","",,,"Cluster 1","Tlr6","false","false","Cluster 3","Clustered","8.0","Clustered","10.0","ENSMUSG00000051498"
"2054","","",,,"Cluster 1","D16Ertd472e","false","false","Cluster 3","Clustered","8.192307692307692","Clustered","9.871794871794872","ENSMUSG00000022864"
"2053","","",,,"Cluster 1","Ildr1","false","false","Cluster 3","Clustered","8.0","Clustered","10.0","ENSMUSG00000022900"
"1028","","",,,"Cluster 1","Lect2","false","false","Cluster 3","Clustered","7.822222222222222","Clustered","9.722222222222221","ENSMUSG00000021539"
"2050","","",,,"Cluster 3","Tuba1b","false","false","Cluster 3","Clustered","8.010989010989011","Clustered","11.076923076923077","ENSMUSG00000023004"
"2049","","",,,"Cluster 2","Fmnl3","false","false","Cluster 3","Clustered","8.0","Clustered","8.018181818181818","ENSMUSG00000023008"
"2048","","",,,"Cluster 1","Nckap5l","false","false","Cluster 3","Clustered","8.307692307692308","Clustered","9.67032967032967","ENSMUSG00000023009"
"2045","","",,,"Cluster 1","Slc4a8","false","false","Cluster 3","Clustered","9.0","Clustered","10.166666666666666","ENSMUSG00000023032"
"2041","","",,,"Cluster 1","Sgol1","false","false","Cluster 3","Clustered","8.076923076923077","Clustered","9.428571428571429","ENSMUSG00000023940"
"2040","","",,,"Cluster 1","Lbh","false","false","Cluster 3","Clustered","8.0","Clustered","10.0","ENSMUSG00000024063"
"1015","","",,,"Cluster 1","Khdrbs3","false","false","Cluster 3","Clustered","7.418181818181818","Clustered","8.345454545454546","ENSMUSG00000022332"
"1526","","",,,"Cluster 1","H13","false","false","Cluster 3","Clustered","8.590909090909092","Clustered","9.54945054945055","ENSMUSG00000019188"
"2036","","",,,"Cluster 1","Kifc5b","false","false","Cluster 3","Clustered","7.8431372549019605","Clustered","10.1","ENSMUSG00000024301"
"1523","","",,,"Cluster 1","Apc2","false","false","Cluster 3","Clustered","7.418181818181818","Clustered","9.444444444444445","ENSMUSG00000020135"
"2034","","",,,"Cluster 1","Impa2","false","false","Cluster 3","Clustered","8.181818181818182","Clustered","9.09090909090909","ENSMUSG00000024525"
"2033","","",,,"Cluster 1","Cep192","false","false","Cluster 3","Clustered","8.454545454545455","Clustered","9.871794871794872","ENSMUSG00000024542"
"1520","","",,,"Cluster 1","Gatsl3","false","false","Cluster 3","Clustered","7.644444444444445","Clustered","9.09090909090909","ENSMUSG00000020424"
"2032","","",,,"Cluster 1","Pde6a","false","false","Cluster 3","Clustered","7.5636363636363635","Clustered","8.787878787878787","ENSMUSG00000024575"
"2031","","",,,"Cluster 1","Slc12a2","false","false","Cluster 3","Clustered","9.0","Clustered","9.636363636363637","ENSMUSG00000024597"
"2030","","",,,"Cluster 1","Cndp2","false","false","Cluster 3","Clustered","8.672727272727272","Clustered","8.846153846153847","ENSMUSG00000024644"
"2027","","",,,"Cluster 3","Kif20b","false","false","Cluster 3","Clustered","9.0","Clustered","10.694444444444445","ENSMUSG00000024795"
"2021","ARCHS4 Coexpression,918;Enrichr Queries,1274;GTEx Coexpression,1201","GALNT12,CNTNAP2,BTG2,CELF2,RORA,NR3C1,MKI67,ETS1,IGF1R,ZC3H12C,TUBA1A,SH3PXD2A,CCND1,DPYSL2,CHEK2,STMN1,ANXA6,CEP170,CCDC92,PDK1,SLC36A1,MBNL1,KLF12,DST,ARID5B,DYNAP,ZDHHC15,MMS22L,NR5A2,TEX9,MAP1B,CDHR5,CFTR,NOTCH2,ILDR1,SLCO5A1,NREP,ADD3,THBS1,AURKB,MUC2,NLRP6,MAP2,LRIG1,GCNT3,TRPM5,ATOH1,NXNL2,RUNX1T1,POU2F1,CBX5,B3GALT5,KLF4,SORBS3,GUCA2A,P2RX4,CDK6,NFIB,ETNK1,ASXL3,MYO5C,FRYL,ITM2C","1327","1131.0","Cluster 1","Lcor","false","false","Cluster 3","Clustered","7.5636363636363635","Clustered","9.454545454545455","ENSMUSG00000025019"
"2020","","",,,"Cluster 1","Arhgap19","false","false","Cluster 3","Clustered","8.50909090909091","Clustered","8.93939393939394","ENSMUSG00000025154"
"2016","","",,,"Cluster 1","Pde8a","false","false","Cluster 3","Clustered","7.973856209150327","Clustered","9.568627450980394","ENSMUSG00000025584"
"2015","","",,,"Cluster 1","Plk4","false","false","Cluster 3","Clustered","8.0","Clustered","10.0","ENSMUSG00000025758"
"2012","","",,,"Cluster 1","Dtymk","false","false","Cluster 3","Clustered","7.418181818181818","Clustered","10.0","ENSMUSG00000026281"
"2011","","",,,"Cluster 3","Rgs2","false","false","Cluster 3","Clustered","8.416666666666666","Clustered","10.68131868131868","ENSMUSG00000026360"
"1499","","",,,"Cluster 2","Ncf2","false","false","Cluster 3","Clustered","7.644444444444445","Clustered","7.021978021978022","ENSMUSG00000026480"
"2010","","",,,"Cluster 1","Ube2t","false","false","Cluster 3","Clustered","7.542857142857143","Seed","10.333333333333334","ENSMUSG00000026429"
"1497","","",,,"Cluster 1","Hspa5","false","false","Cluster 3","Clustered","8.454545454545455","Clustered","8.461538461538462","ENSMUSG00000026864"
"1496","","",,,"Cluster 2","Gpsm1","false","false","Cluster 3","Clustered","7.5636363636363635","Clustered","7.5","ENSMUSG00000026930"
"2008","","",,,"Cluster 1","Capn2","false","false","Cluster 3","Clustered","7.644444444444445","Clustered","8.909090909090908","ENSMUSG00000026509"
"2006","","",,,"Cluster 2","Cenpf","false","false","Cluster 3","Clustered","7.644444444444445","Clustered","8.018181818181818","ENSMUSG00000026605"
"2004","","",,,"Cluster 1","Vim","false","false","Cluster 3","Clustered","8.192307692307692","Clustered","8.681318681318682","ENSMUSG00000026728"
"1491","","",,,"Cluster 1","Sdcbp2","false","false","Cluster 3","Clustered","7.644444444444445","Clustered","10.0","ENSMUSG00000027456"
"2002","","",,,"Cluster 1","Pkn3","false","false","Cluster 3","Clustered","7.5636363636363635","Clustered","8.93939393939394","ENSMUSG00000026785"
"2001","","",,,"Cluster 1","Apbb1ip","false","false","Cluster 3","Clustered","8.0","Clustered","10.0","ENSMUSG00000026786"
"2000","","",,,"Cluster 1","Gsn","false","false","Cluster 3","Clustered","8.672727272727272","Clustered","9.242424242424242","ENSMUSG00000026879"
"1999","","",,,"Cluster 1","Egfl7","false","false","Cluster 3","Clustered","8.0","Clustered","9.0","ENSMUSG00000026921"
"1997","","",,,"Cluster 1","Itga4","false","false","Cluster 3","Clustered","7.5636363636363635","Clustered","10.0","ENSMUSG00000027009"
"1482","ARCHS4 Coexpression,2;GTEx Coexpression,7","ERCC6L,DSCC1,CCNF,BUB1B,TTF2,MKI67,SMC4,SMC2,CEP128,CDC20,CHEK1,KNTC1,FBXO5,SKP2,GTSE1,TIPIN,GAS2L3,ZGRF1,VRK1,ESCO2,CDC25C,KNSTRN,WDR76,TRAIP,NEIL3,MELK,DNA2,KIF20B,PRR11,ASF1B,PIF1,CDCA3,TROAP,CDCA7,ARHGAP19,NCAPG,SKA3,PKMYT1,IQGAP3,NCAPH,SKA1,RAD51AP1,CCNB2,CCNB1,RACGAP1,ORC1,FIGNL1,PGK1,CLSPN,ECT2,FAM83D,PLK4,FANCI,CCDC18,STIL,DDIAS,UBE2C,XRCC2,PLK1,HMGA1,FANCB,CDC6,TPX2,ANLN,DIAPH3,UBE2T,CDK1,TOP2A,NCAPG2,KIF14,HMGB2,MCM10,BRCA1,KIF11,FOXM1,BRCA2,LMNB1,KIF15,TUBA1B,CHAF1A,EXO1,MIS18BP1,NUF2,PBK,MYBL2,SPDL1,TK1,TOPBP1,CEP55,RFC5,NDC1,TCF19,TEAD4,HELLS,RMI2,RFC3,RFC4,ITGA4,CKAP2,KIF23,KIF22,MASTL,CCNA2,MMS22L,ASPM,RBL1,DBF4,ESPL1,SAPCD2,INCENP,KIFC1,MCM3,CKS2,MCM4,BIRC5,TRIM59,MCM5,DNAJC9,KIF2C,MCM6,MTFR2,DTL,MCM2,DTYMK,PCNA,PKN3,UHRF1,PRIM1,TTK,TYMS,AURKB,AURKA,RAD54B,POLD1,E2F1,USP1,RAD54L,BUB1,E2F7,E2F8,GINS1,CENPU,RRM1,RRM2,CDKN2C,ATAD5,SPAG5,ATAD2,MND1,TICRR,CENPE,CENPF,MIS18A,RAD51,CENPH,CENPI,PRC1,CENPM,CENPN,TRIP13,SPC24,MAD2L1,CDKN3","1","4.5","Cluster 1","Cenpa","false","false","Cluster 3","Clustered","8.836363636363636","Clustered","8.974358974358974","ENSMUSG00000029177"
"1992","","",,,"Cluster 1","Knl1","false","false","Cluster 3","Clustered","7.813186813186814","Clustered","9.871794871794872","ENSMUSG00000027326"
"1991","","",,,"Cluster 1","Gins1","false","false","Cluster 3","Clustered","8.0","Clustered","10.0","ENSMUSG00000027454"
"1988","","",,,"Cluster 2","Zbp1","false","false","Cluster 3","Clustered","8.0","Clustered","8.181818181818182","ENSMUSG00000027514"
"1985","","",,,"Cluster 1","Fam83d","false","false","Cluster 3","Clustered","8.0","Clustered","8.6","ENSMUSG00000027654"
"1472","","",,,"Cluster 1","C2cd2l","false","false","Cluster 3","Clustered","8.0","Clustered","10.0","ENSMUSG00000032120"
"1981","","",,,"Cluster 1","Notch2","false","false","Cluster 3","Clustered","7.602339181286549","Clustered","9.411764705882353","ENSMUSG00000027878"
"1980","","",,,"Cluster 1","Ccdc109b","false","false","Cluster 3","Clustered","8.0","Clustered","8.6","ENSMUSG00000027994"
"1464","","",,,"Cluster 1","Ramp1","false","false","Cluster 3","Clustered","7.822222222222222","Clustered","10.0","ENSMUSG00000034353"
"1976","ARCHS4 Coexpression,648;Enrichr Queries,668;GTEx Coexpression,1034","FCGBP,CD83,NRROS,RORA,ETS1,IFIT3,IFIT2,LGALS3,RGS2,CCND1,BASP1,DPYSL2,MYC,SLCO2B1,GJA4,LONP1,DPF3,TGM2,IER3,RSAD2,IL1R1,IGFBP4,CACNA2D1,IGFBP3,ARID5A,ARID5B,VASH1,ADAM19,MYL7,PADI2,RIN3,CSF1R,SEMA7A,SDC4,LPL,STC1,SLCO5A1,PIK3R5,TRPM2,BCL2L11,SCIN,HIVEP3,SLC19A2,EGR2,TGFB2,BDNF,GADD45G,FOSL1,ISG20,CXCL10,PTPRE,RGCC,PAM,NRP1,BTG2,FHL1,TNFAIP2,RND3,DUSP10,STBD1,TIMP3,TNFAIP8L3,LMCD1,PLAUR,TBC1D8,APBB1IP,MN1,RNF144B,IRF1,B3GNT5,KIT,ADSSL1,PLCB2,C1QA,SMPX,RGS16,FAM129A,SRL,THBS1,SLC7A2,AURKB,NT5E,RASD1,CHSY1,LRIG1,GCH1,GK,LAPTM5,GPR4,LHFPL2,KLF4,FMNL3,P2RX4,ALOX5AP,ACKR3,FOSB,VIM","915","783.3","Cluster 3","Nr4a3","false","false","Cluster 3","Clustered","8.748538011695906","Clustered","11.761904761904763","ENSMUSG00000028341"
"1974","","",,,"Cluster 3","Usp1","false","false","Cluster 3","Clustered","9.010989010989011","Clustered","11.076923076923077","ENSMUSG00000028560"
"949","","",,,"Cluster 1","Efhd1","false","false","Cluster 3","Clustered","7.5636363636363635","Clustered","9.454545454545455","ENSMUSG00000026255"
"1971","","",,,"Cluster 1","Ndc1","false","false","Cluster 3","Clustered","8.318181818181818","Clustered","9.242424242424242","ENSMUSG00000028614"
"1970","","",,,"Cluster 1","Ctps","false","false","Cluster 3","Clustered","8.672727272727272","Clustered","9.636363636363637","ENSMUSG00000028633"
"946","","",,,"Cluster 1","Tnfrsf11a","false","false","Cluster 3","Clustered","9.0","Clustered","9.242424242424242","ENSMUSG00000026321"
"1964","","",,,"Cluster 1","Stil","false","false","Cluster 3","Clustered","9.0","Clustered","10.166666666666666","ENSMUSG00000028718"
"1963","","",,,"Cluster 1","Stmn1","false","false","Cluster 3","Clustered","8.076923076923077","Clustered","10.166666666666666","ENSMUSG00000028832"
"1962","","",,,"Cluster 1","Fgr","false","false","Cluster 3","Clustered","7.418181818181818","Clustered","9.272727272727273","ENSMUSG00000028874"
"938","ARCHS4 Coexpression,526;Enrichr Queries,189;GTEx Coexpression,509","SEMA5A,RAB3C,IRS1,RORA,SLC4A4,TMEM92,SLC8A1,HID1,IGF1R,CAPN8,CAPN9,MCIDAS,VSIG1,CDH2,LIPH,CREB3L1,CHEK2,RASSF6,PIEZO1,PLXNC1,EPHA4,EPHA7,CACNA2D1,TTC7B,ACSL6,ARID5B,ANXA10,ISL1,FAM227A,ERN2,RFX6,TEX9,KCNQ1,ADAM12,LGALS12,SCG5,SCG3,TSHZ2,GLIS3,CACNA1A,LPL,SLC38A11,CACNA1C,NREP,FAM221A,MAP2,GALR1,SCN3A,PLXNA4,NXNL2,TGFB2,FER1L4,DTNA,SYT1,CADM1,NEBL,BDNF,ANKRD22,NFATC2,MCC,FER1L6,DCLK1,GNAO1,SDK1,CXCL10,IRAK1BP1,AKR1B10,RCAN2,CPE,XKR4,SNAP25,CNTNAP2,BTG2,PSCA,TENM4,CELF2,PTPRM,SYNE1,UNC80,PCLO,TUBA1A,MECOM,DNER,NEFM,KLF12,RPS6KL1,ETV1,PAX6,SSTR1,PROX1,ZDHHC15,NR5A2,PLCB4,ALDH1A1,KIT,KCNMA1,TFF2,PLCB1,GPRC5C,PDZRN3,ASPA,RAPGEF4,CAMK2B,OPRD1,REP15,PALM3,PRUNE2,FAM129A,ADCY1,CXXC4,AURKB,NCALD,MFSD4A,AGR2,SLIT1,LRIG1,SLIT2,PDE6A,PAK3,RUNX1T1,KCNB1,CADPS,LHFPL5,SORBS2,PNMA2,KLF4,FMO5,SORL1,RFLNA,MLPH,ABI2,NFIB,SGSM3,A4GNT,GHRL,FOXA3","342","408.0","Cluster 1","Esrrg","false","false","Cluster 3","Clustered","7.644444444444445","Clustered","9.0","ENSMUSG00000026610"
"1960","","",,,"Cluster 3","Emilin1","false","false","Cluster 3","Clustered","8.307692307692308","Clustered","10.5","ENSMUSG00000029163"
"1448","","",,,"Cluster 1","Plcb4","false","false","Cluster 3","Clustered","7.418181818181818","Clustered","10.0","ENSMUSG00000039943"
"1959","","",,,"Cluster 1","Mapre3","false","false","Cluster 3","Clustered","7.644444444444445","Clustered","8.6","ENSMUSG00000029166"
"1958","","",,,"Cluster 1","Fam114a1","false","false","Cluster 3","Clustered","7.418181818181818","Clustered","9.272727272727273","ENSMUSG00000029185"
"1953","","",,,"Cluster 3","P2rx4","false","false","Cluster 3","Clustered","8.318181818181818","Clustered","10.694444444444445","ENSMUSG00000029470"
"1952","","",,,"Cluster 1","Cit","false","false","Cluster 3","Clustered","8.318181818181818","Clustered","8.351648351648352","ENSMUSG00000029516"
"1949","","",,,"Cluster 1","Slc46a3","false","false","Cluster 3","Clustered","7.822222222222222","Clustered","10.0","ENSMUSG00000029650"
"1947","","",,,"Cluster 1","Slc23a4","false","false","Cluster 3","Clustered","7.418181818181818","Clustered","8.787878787878787","ENSMUSG00000029847"
"1944","","",,,"Cluster 1","Lrig1","false","false","Cluster 3","Clustered","7.5636363636363635","Clustered","9.454545454545455","ENSMUSG00000030029"
"1432","","",,,"Cluster 3","Arhgap23","false","false","Cluster 3","Clustered","7.912087912087912","Clustered","10.5","ENSMUSG00000049807"
"1430","","",,,"Cluster 1","Tnfsf15","false","false","Cluster 3","Clustered","9.0","Clustered","10.0","ENSMUSG00000050395"
"1941","","",,,"Cluster 1","Etnk1","false","false","Cluster 3","Clustered","8.076923076923077","Clustered","9.871794871794872","ENSMUSG00000030275"
"1932","","",,,"Cluster 1","Ap1s2","false","false","Cluster 3","Clustered","9.0","Clustered","9.636363636363637","ENSMUSG00000031367"
"1931","","",,,"Cluster 3","Rasa3","false","false","Cluster 3","Clustered","7.822222222222222","Clustered","10.694444444444445","ENSMUSG00000031453"
"1926","","",,,"Cluster 3","Pla2g15","false","false","Cluster 3","Clustered","8.333333333333334","Clustered","10.68131868131868","ENSMUSG00000031903"
"1413","","",,,"Cluster 1","Hs3st3b1","false","false","Cluster 3","Clustered","7.813186813186814","Clustered","9.54945054945055","ENSMUSG00000070407"
"1410","","",,,"Cluster 1","Slfn2","false","false","Cluster 3","Clustered","8.836363636363636","Clustered","9.871794871794872","ENSMUSG00000072620"
"1921","","",,,"Cluster 1","Kif23","false","false","Cluster 3","Clustered","8.0","Clustered","9.09090909090909","ENSMUSG00000032254"
"1409","","",,,"Cluster 1","Selenom","false","false","Cluster 3","Clustered","8.836363636363636","Clustered","9.818181818181818","ENSMUSG00000075702"
"1916","","",,,"Cluster 1","Car12","false","false","Cluster 3","Clustered","8.0","Clustered","8.4","ENSMUSG00000032373"
"891","","",,,"Cluster 1","Htra3","false","false","Cluster 3","Clustered","8.836363636363636","Clustered","9.818181818181818","ENSMUSG00000029096"
"1913","","",,,"Cluster 1","Chsy1","false","false","Cluster 3","Clustered","8.590909090909092","Clustered","10.012820512820513","ENSMUSG00000032640"
"1912","","",,,"Cluster 3","37681","false","false","Cluster 3","Clustered","8.010989010989011","Clustered","10.5","ENSMUSG00000032656"
"1909","","",,,"Cluster 1","Troap","false","false","Cluster 3","Clustered","8.318181818181818","Clustered","8.351648351648352","ENSMUSG00000032783"
"883","","",,,"Cluster 1","Mmp17","false","false","Cluster 3","Clustered","7.418181818181818","Clustered","8.345454545454546","ENSMUSG00000029436"
"1906","","",,,"Cluster 1","Ift57","false","false","Cluster 3","Clustered","8.0","Clustered","9.09090909090909","ENSMUSG00000032965"
"1904","","",,,"Cluster 1","Kctd17","false","false","Cluster 3","Clustered","8.181818181818182","Clustered","8.351648351648352","ENSMUSG00000033287"
"1903","","",,,"Cluster 1","Ttc7b","false","false","Cluster 3","Clustered","9.0","Clustered","8.93939393939394","ENSMUSG00000033530"
"1899","","",,,"Cluster 1","Vav1","false","false","Cluster 3","Clustered","8.0","Clustered","10.0","ENSMUSG00000034116"
"1383","","",,,"Cluster 1","Syt7","false","false","Cluster 3","Clustered","9.0","Clustered","9.454545454545455","ENSMUSG00000024743"
"1894","","",,,"Cluster 3","Trim59","false","false","Cluster 3","Clustered","8.666666666666668","Clustered","10.742857142857144","ENSMUSG00000034317"
"1893","","",,,"Cluster 1","Hid1","false","false","Cluster 3","Clustered","8.0","Clustered","8.6","ENSMUSG00000034586"
"1378","","",,,"Cluster 3","Rbpms","false","false","Cluster 3","Clustered","8.318181818181818","Clustered","10.694444444444445","ENSMUSG00000031586"
"1890","","",,,"Cluster 1","Fam214a","false","false","Cluster 3","Clustered","7.644444444444445","Clustered","8.4","ENSMUSG00000034858"
"866","","",,,"Cluster 1","Scnn1a","false","false","Cluster 3","Clustered","7.822222222222222","Clustered","8.799999999999999","ENSMUSG00000030340"
"1889","","",,,"Cluster 1","Lrr1","false","false","Cluster 3","Clustered","7.912087912087912","Clustered","10.166666666666666","ENSMUSG00000034883"
"863","ARCHS4 Coexpression,1223;Enrichr Queries,255;GTEx Coexpression,225","FOXA1,FCGBP,EHF,CHRM1,ANKLE1,STMN3,DACH2,RIMS4,CCND1,CREB3L1,CHEK2,PALM,MYB,SH2D6,SH2D5,RGS7,IER3,RNF43,IGFBP4,IGFBP3,SYTL1,KCTD1,ISL1,OVOL2,FAM227A,CLDN4,MAP1A,LGALS12,NUPR1,LMX1B,BRSK1,CACNA1A,RAP1GAP,SKA1,TRPM2,FAM221A,NUAK1,HRH1,KLC3,SCIN,MAP2,STC2,KIF3C,RIMKLA,RAB6B,WNT3,PACSIN1,FN3K,NGFR,PRNP,EGR2,MAGEE1,VDR,TRPV3,POU2F3,GADD45G,FOSL1,BMP4,CXCL10,PKIB,GJB2,EFNA3,BFSP1,XKR9,DLG4,PPP1R1B,ALPL,FGFR3,LRP11,ITM2C,RET,CNTNAP2,COL18A1,BTG2,ATP2A3,CELF5,HSPB1,TFCP2L1,LFNG,C1QTNF1,NETO1,GDAP1L1,IDS,KIF1A,SULT4A1,KRT222,PIANP,TNFRSF19,SYP,AXIN2,SYN2,ETV4,SYN1,CIT,TUBB2A,SAPCD2,KIT,IRF7,ARHGEF4,BIRC5,ASPA,MGLL,NIM1K,LAMA4,SNX32,ASCL2,THBS1,PPM1E,AURKB,DLL3,RASD2,RASD1,SV2A,CAMK2N1,ATOH8,LRIG1,MSX1,GABRA2,GABBR2,GINS3,LHFPL5,PNMA2,FBXL16,KLF4,GRIN1,DHODH,TTC9,MORN4,FKBP1B,FOSB,APBA1","611","567.7","Cluster 1","Mesp2","false","false","Cluster 3","Clustered","8.672727272727272","Clustered","9.636363636363637","ENSMUSG00000030543"
"1375","","",,,"Cluster 2","Rasgrf1","false","false","Cluster 3","Clustered","7.418181818181818","Clustered","7.636363636363637","ENSMUSG00000032356"
"1886","","",,,"Cluster 2","Plk5","false","false","Cluster 3","Clustered","7.644444444444445","Clustered","8.181818181818182","ENSMUSG00000035486"
"859","","",,,"Cluster 1","Acsm3","false","false","Cluster 3","Clustered","8.0","Clustered","8.6","ENSMUSG00000030935"
"1883","","",,,"Cluster 1","Dennd5a","false","false","Cluster 3","Clustered","8.836363636363636","Clustered","10.333333333333334","ENSMUSG00000035901"
"1877","","",,,"Cluster 1","Card11","false","false","Cluster 3","Clustered","9.0","Clustered","10.0","ENSMUSG00000036526"
"1363","","",,,"Cluster 3","Qk","false","false","Cluster 3","Clustered","8.455882352941176","Clustered","12.142857142857142","ENSMUSG00000062078"
"1362","ARCHS4 Coexpression,414;Enrichr Queries,155;GTEx Coexpression,364","NCF2,DIXDC1,RORA,FRY,NR3C1,ETS1,SLC8A1,IGF1R,LGALS3,RGS2,CCND1,CDH2,BASP1,DPYSL2,MYC,CHEK2,DPYSL3,PIP4K2A,PLXNC1,FBXO9,TGM2,TRIQK,ARID5B,FRMD4A,RUNDC3A,MPEG1,OVOL2,ADAM19,SELENOM,MAP1B,SCNN1A,SCG5,KCNQ4,SCG3,MXRA7,KCTD12,MYL9,NOTCH2,AKNA,EPB42,ARHGEF25,STXBP1,GLIS3,CACNA1A,LPL,ITPR2,CACNA1C,NREP,CACNA1H,BAG2,PRKAR2B,PDGFC,PRNP,EGR2,TGFB2,RBPMS,ATP8B2,FZD7,CRIM1,KLHL23,DCLK1,REEP1,CXCL10,CDK6,RCAN2,IGSF9B,CDK14,PAM,FERMT2,ITM2C,NRP1,BTG2,TGFB1I1,CELF2,ATP2A3,SOBP,SYNE1,LBH,ADGRE5,TIMP2,TIMP3,TCP11L2,IDS,FFAR2,CC2D2A,KLF12,CAMK1D,PPP2R5B,NME4,GPCPD1,SPTB,OOEP,ZDHHC15,FGR,HCK,SETBP1,IRF1,KCNMA1,CDC42EP3,ATP6V1B2,MCM3,PLEKHO1,SPACA6,PLCB1,PDZRN3,MGLL,VAMP2,HEMGN,PLPPR2,CCDC69,PRUNE2,FAM129A,NEXN,TYMS,THBS1,AURKB,NCALD,NT5E,GNG2,ALOX5,TCEAL1,LRIG1,APBB1,SLC36A4,RUNX1T1,PLCL1,SORBS2,LHFPL2,KLF4,SORL1,FMNL1,WEE2,SYT11,NFIB,QPCT,IMPDH2,SARM1,VIM,YPEL3,MEGF9","223","311.0","Cluster 1","Jazf1","false","false","Cluster 3","Clustered","8.50909090909091","Clustered","9.09090909090909","ENSMUSG00000063568"
"1872","ARCHS4 Coexpression,1393;Enrichr Queries,553;GTEx Coexpression,213","IFITM3,SOGA1,ETS1,CELSR3,HID1,LGALS3,RGS2,CCND1,DPYSL2,MYC,LONP1,PIEZO1,GLUL,TGM2,IER3,MYLIP,TLE2,RBFOX3,IGFBP4,IGFBP3,ARID5B,MYT1,DISP2,TIAM1,ACAP3,GPR162,RAB37,S100A6,ANKS6,KCTD12,NUPR1,SQSTM1,NOTCH1,SDC4,STXBP1,CACNA1A,NREP,ZFP36L2,NEUROD1,SLC9A3R2,IGSF21,NEUROD2,NUAK1,GRK2,PCBP3,NPTX1,PRNP,PLK5,CARMIL3,OSBPL5,NBEAL2,ABCA7,FBXO32,GADD45G,PKIB,XKR7,MAP3K12,ITM2C,NRP1,BTG2,TMEM151B,KCNC1,HSPB1,SYNE1,UNC80,LFNG,MMP24,KCNT1,PCLO,TUBA1A,FAM102A,SH3PXD2A,MCF2L,TRIM3,TIMP2,ANXA6,TCP11L2,TIMP3,QSOX2,CTSF,TRIM67,HIST1H1C,SMIM14,ABCC8,PPP2R5B,ETV1,PAX6,KCNAB3,IRF1,GAS6,MGLL,SLC43A2,PLPPR2,LRP3,CXXC5,FAM214A,THBS1,AURKB,CAMK2N1,LRIG1,GABRD,RUNX1T1,GSN,KLHL3,KLF4,SORBS3,STXBP5L,PIK3IP1,CROCC,INSM1,COQ8A,VIM,CBLN3,UNC79,YPEL3","817","719.7","Cluster 1","Mxd4","false","false","Cluster 3","Clustered","7.813186813186814","Clustered","9.428571428571429","ENSMUSG00000037235"
"1871","","",,,"Cluster 1","Man1c1","false","false","Cluster 3","Clustered","8.590909090909092","Clustered","10.012820512820513","ENSMUSG00000037306"
"1869","ARCHS4 Coexpression,377;GTEx Coexpression,778","DENND1C,NRROS,CD83,DOCK8,ITGAL,RCSD1,LIMD2,PSTPIP1,GLIPR1,ADGRE5,RASSF5,PIM2,CD53,SP110,ANKRD44,PLAUR,VAV1,ETV6,ADAM19,APBB1IP,FGR,HCK,RASA3,IRF1,MFNG,IRF7,RIN3,PLEKHO1,DOCK2,HCST,PLCB2,CARD11,C1QA,CSF1R,AKNA,TMEM71,PIK3R5,GRK2,GRK5,CHSY1,SH3BP1,SPOCK2,ALOX5,INPP5D,ST8SIA4,SARAF,CARMIL2,RNF24,LAPTM5,RAB27A,BMX,ISG20,FMNL3,PTPRE,RIT1,FMNL1,PIK3IP1,FES,TRIM38","621","577.5","Cluster 3","Arid5a","false","false","Cluster 3","Clustered","9.12087912087912","Clustered","11.23076923076923","ENSMUSG00000037447"
"1868","","",,,"Cluster 3","Kcnh3","false","false","Cluster 3","Clustered","9.12087912087912","Clustered","10.945054945054945","ENSMUSG00000037579"
"1866","","",,,"Cluster 1","Cdkn3","false","false","Cluster 3","Clustered","7.644444444444445","Clustered","9.09090909090909","ENSMUSG00000037628"
"1354","ARCHS4 Coexpression,303;Enrichr Queries,42;ReMap ChIP-seq,281;GTEx Coexpression,57","MDC1,GLDC,CCNF,MKI67,SMC4,ENO3,CLDN1,CDC20,LGALS3,SAMD14,CHEK2,DPYSL2,MYC,CHEK1,DPYSL3,MYB,FBXO5,GTSE1,IER3,TMEM88B,SERPINF2,RNASE4,ESCO2,HSPG2,CLDN6,NEIL3,CLDN9,MXRA7,KIF20B,PRR11,SDC4,CDCA3,SHMT2,CDCA7,NCAPG,STC1,SKA3,SKA1,CRACR2B,FIGNL1,STC2,PCK1,KCNN4,EGR2,XRCC2,SLC35E4,FZD7,PLK1,CDC6,SMARCA1,NR0B2,FOSL1,TPX2,ANLN,UCK2,SDC1,C2CD2L,ITM2C,TOP2A,COL18A1,TMEM151B,PHF1,SUV39H1,NCAPG2,KIF14,KIF11,BRCA1,BRCA2,JPH4,CHAF1A,NUF2,TMED3,PBK,TIMP3,TK1,CEP55,NDC1,PSD,TEAD4,HELLS,RMI2,TMEM150A,KIF23,NME4,IL17RE,RHOC,F2,RENBP,DDB2,KIFC1,ADSSL1,KIF2C,GART,GPRC5C,FJX1,VAMP2,DTYMK,PCNA,SLC43A3,SNX33,AFP,TYMS,CENPA,RAD54B,UNG,NT5E,SLC17A9,CAMK2N1,MBNL3,SLC16A1,ATAD2,SYVN1,AGT,CENPE,CENPF,CENPI,FOSB,TRIP13,YPEL3,FOXA3,MAD2L1,ERCC6L,CHPF,PROS1,ZC3HAV1L,BUB1B,TTF2,ETS1,CCND1,LZTS1,TGM2,IGFBP4,IGFBP3,IGFBP2,PDIA6,PLA2G15,VMAC,ACAP3,MELK,MSH2,DKC1,S100A6,RTN2,AK4,PKMYT1,ZFP36L2,RAD51AP1,SLC9A3R2,CCNB2,CCNB1,GRK2,GRK5,PODXL,ECT2,PRNP,STIL,TGFB2,AMBP,UBE2C,HMGA1,HMGA2,SSC5D,FANCB,BMP4,CXCL10,CDK6,PROC,GGCX,DLG4,CDK1,FGFR3,TNFAIP2,HSPB1,MCM10,FOXM1,LMNB1,PIDD1,EXO1,EMILIN1,MYBL2,HIST1H1C,HS3ST3B1,PLAUR,ETV1,AXIN2,MASTL,CKAP4,GIP,SSTR5,CCNA2,ASPM,CREB3,MCM3,MCM4,BIRC5,ANG,MCM5,ITGA5,MCM6,DTL,UHRF1,RGS16,TTK,THBS1,AURKB,AURKA,SH3BP1,NT5DC2,POLD2,LRIG1,E2F1,HES1,BUB1,E2F7,LRRC8E,E2F8,RRM1,RRM2,SPAG5,ARID3A,KLF4,TICRR,PRC1,IMPDH2,VIM,SNTB1","79","170.8","Cluster 1","Etv4","false","false","Cluster 3","Clustered","8.836363636363636","Clustered","8.974358974358974","ENSMUSG00000017724"
"841","","",,,"Cluster 1","Comp","false","false","Cluster 3","Clustered","7.822222222222222","Clustered","8.799999999999999","ENSMUSG00000031849"
"1861","","",,,"Cluster 1","Gcc2","false","false","Cluster 3","Clustered","7.644444444444445","Clustered","8.636363636363637","ENSMUSG00000038039"
"1859","","",,,"Cluster 1","Mylip","false","false","Cluster 3","Clustered","8.0","Clustered","10.0","ENSMUSG00000038175"
"1344","","",,,"Cluster 3","Rasa4","false","false","Cluster 3","Clustered","8.672727272727272","Clustered","10.694444444444445","ENSMUSG00000004952"
"829","ARCHS4 Coexpression,635;Enrichr Queries,224;GTEx Coexpression,602","SEMA5A,ANKRD35,CWH43,FRY,NR3C1,CLDN1,ETS1,SLC8A1,IGF1R,LGALS3,RGS2,CCND1,DPYSL2,MYC,RASSF5,LONP1,GRB10,LIPK,PLXNC1,TNS4,GLUL,IER3,EPHA4,MBNL1,DAPK1,CACNA2D1,IGFBP3,ANKRD44,ARID5B,FRMD4A,SYTL2,TIAM1,COL17A1,AKNA,TCF7,ZFP36L2,ALDH3B2,KLC3,RDH12,SARAF,HIVEP3,ST3GAL1,WNT3,BARD1,PRNP,TMEM86A,EGR2,TGFB2,GSDMA,CADM1,NEBL,CRIM1,TRPV3,NFATC2,ESRRG,FBXO32,MCC,POU2F3,DCLK1,GNG13,TPX2,EFNA3,CDK6,RGCC,GJB3,LYPD6B,RCAN3,SP6,SDC1,ITM2C,NRP1,BTG2,PTPRR,CELF2,DOCK8,PTPRM,ITGAL,SYNE1,SDR16C5,TUBA1B,TIMP3,TCP11L2,PLEKHN1,EMB,DENND2C,KLF12,CAMK1D,DST,ITGA4,TNFRSF19,NME4,IL17RE,PARP8,PLCB4,SETBP1,IRF1,KIT,KCNMA1,PLCB1,FAM129A,NLRC3,ADD3,THBS1,AURKB,NCALD,ABLIM1,SPOCK2,NT5DC2,RNF39,LRIG1,SPTSSB,RUNX1T1,PLA2G2F,GSN,AHNAK2,KRT10,KLF4,SORL1,PIK3IP1,NFIB,IMPDH2,TRIM35,FOSB,VIM,CENPP","478","487.0","Cluster 1","Rora","false","false","Cluster 3","Clustered","8.935064935064934","Clustered","8.434782608695652","ENSMUSG00000032238"
"828","","",,,"Cluster 1","Paqr5","false","false","Cluster 3","Clustered","8.0","Clustered","9.0","ENSMUSG00000032278"
"1850","","",,,"Cluster 1","Osbpl2","false","false","Cluster 3","Clustered","8.672727272727272","Clustered","10.166666666666666","ENSMUSG00000039050"
"1847","","",,,"Cluster 1","Prune2","false","false","Cluster 3","Clustered","8.836363636363636","Clustered","9.871794871794872","ENSMUSG00000039126"
"1335","","",,,"Cluster 1","Cd83","false","false","Cluster 3","Clustered","7.418181818181818","Clustered","8.787878787878787","ENSMUSG00000015396"
"1845","","",,,"Cluster 1","Fam102a","false","false","Cluster 3","Clustered","7.5636363636363635","Clustered","8.93939393939394","ENSMUSG00000039157"
"1844","ARCHS4 Coexpression,286;Enrichr Queries,151;GTEx Coexpression,492","IFITM3,NRROS,CD83,NCF2,GFI1,ETS1,IFIT3,GIMAP8,IFIT2,PREX1,RGS2,RINL,BASP1,DPYSL2,RASSF5,MYC,LONP1,PIP4K2A,PLXNC1,ZBP1,SP110,ANKRD44,ARID5A,ARID5B,MPEG1,ADAM19,MFNG,RIN3,CARD11,CSF1R,NOTCH1,HVCN1,TCF7,ZFP36L2,PIK3R5,GRK2,INPP5D,ST8SIA4,ST3GAL1,CARMIL2,DENND4B,NFATC2,NBEAL2,ABCA7,ISG20,PTPRE,CXCL10,ITM2C,DENND1C,BTG2,SH3KBP1,DOCK8,CELF2,TNFAIP2,ATP2A3,ITGAL,RCSD1,PIK3CG,LIMD2,HERPUD1,LFNG,PSTPIP1,ADGRE5,ITGB7,FFAR2,EMB,CD53,ITGA4,SH2D3C,PLAUR,VAV1,PARP8,APBB1IP,FGR,HCK,RASA3,IRF1,TLR6,DOCK2,HCST,PLCB2,RGS14,CCDC69,FAM129A,NLRC3,THBS1,AURKB,FGD2,SH3BP1,ALOX5,LRIG1,LAPTM5,KLF4,SORL1,FMNL1,KLHL7,ALOX5AP,VIM,CD244,YPEL3","222","309.7","Cluster 1","Akna","false","false","Cluster 3","Clustered","9.0","Clustered","9.454545454545455","ENSMUSG00000039158"
"1841","","",,,"Cluster 1","Megf9","false","false","Cluster 3","Clustered","8.0","Clustered","10.0","ENSMUSG00000039270"
"1838","","",,,"Cluster 3","Prex1","false","false","Cluster 3","Clustered","9.0","Clustered","10.694444444444445","ENSMUSG00000039621"
"1837","","",,,"Cluster 1","Sdk1","false","false","Cluster 3","Clustered","8.454545454545455","Clustered","10.333333333333334","ENSMUSG00000039683"
"1324","","",,,"Cluster 1","Tnfaip2","false","false","Cluster 3","Clustered","8.076923076923077","Clustered","9.73076923076923","ENSMUSG00000021281"
"1835","","",,,"Cluster 1","Xkr5","false","false","Cluster 3","Clustered","8.0","Clustered","8.4","ENSMUSG00000039814"
"1834","","",,,"Cluster 1","Dtx4","false","false","Cluster 3","Clustered","8.0","Clustered","10.0","ENSMUSG00000039982"
"810","","",,,"Cluster 2","Ttf2","false","false","Cluster 3","Clustered","8.0","Clustered","8.181818181818182","ENSMUSG00000033222"
"803","","",,,"Cluster 1","Ppargc1b","false","false","Cluster 3","Clustered","9.0","Clustered","10.0","ENSMUSG00000033871"
"802","","",,,"Cluster 2","Atp2c2","false","false","Cluster 3","Clustered","7.644444444444445","Clustered","8.181818181818182","ENSMUSG00000034112"
"1314","","",,,"Cluster 2","Csf1r","false","false","Cluster 3","Clustered","8.0","Clustered","7.636363636363637","ENSMUSG00000024621"
"1825","","",,,"Cluster 1","St8sia4","false","false","Cluster 3","Clustered","9.0","Clustered","10.0","ENSMUSG00000040710"
"1824","","",,,"Cluster 1","Rcsd1","false","false","Cluster 3","Clustered","9.0","Clustered","9.636363636363637","ENSMUSG00000040723"
"799","","",,,"Cluster 1","Rasd2","false","false","Cluster 3","Clustered","8.672727272727272","Clustered","9.636363636363637","ENSMUSG00000034472"
"1822","","",,,"Cluster 1","Crocc","false","false","Cluster 3","Clustered","7.644444444444445","Clustered","9.09090909090909","ENSMUSG00000040860"
"1310","","",,,"Cluster 1","Gk","false","false","Cluster 3","Clustered","8.0","Clustered","10.0","ENSMUSG00000025059"
"1821","","",,,"Cluster 1","Slc19a2","false","false","Cluster 3","Clustered","7.542857142857143","Clustered","9.54945054945055","ENSMUSG00000040918"
"1820","","",,,"Cluster 1","Pif1","false","false","Cluster 3","Clustered","8.192307692307692","Clustered","9.428571428571429","ENSMUSG00000041064"
"1816","","",,,"Cluster 1","Kif14","false","false","Cluster 3","Clustered","8.672727272727272","Clustered","10.166666666666666","ENSMUSG00000041498"
"1304","","",,,"Cluster 1","Inpp1","false","false","Cluster 3","Clustered","9.0","Clustered","9.636363636363637","ENSMUSG00000026102"
"1300","Literature ChIP-seq,97;ARCHS4 Coexpression,573;Enrichr Queries,130;ReMap ChIP-seq,70;GTEx Coexpression,849","IFITM3,MDC1,ANKLE1,FAM89A,GFI1,AQP7,GCC2,NOC2L,MKI67,ENO3,IFIT3,LGALS3,SAMD14,CREB3L1,MYC,CHEK2,MYB,STMN1,LONP1,PIEZO1,CCDC92,GLUL,IER3,PDK1,MBNL1,DNAAF3,RSAD2,SP110,DAPK1,SYTL1,RNASE4,SLC51A,CPT1C,HSPG2,SYTL4,WDR76,CLDN6,PLPP5,TFR2,CLDN9,LGALS12,HOXB4,TYRO3,HOXB3,RIN3,HOXB2,MXRA7,DNA2,HOXB8,STX1A,TSPYL4,ASF1B,PIF1,RWDD2A,EPB42,CDCA3,GIPR,SLC35D3,ENDOD1,CDCA7,MGST2,ADAMTS10,PIK3R5,CRACR2B,PRKAR2B,SARAF,ST8SIA6,KCNN4,RHBDL3,LHPP,ATP6V0A1,SLC19A2,EGR2,GSTM1,FZD7,RAB27A,ABCA7,RAB27B,PYCR2,CDC7,GADD45G,FOSL1,XKR7,TNFSF4,CALR,C2CD2L,ITM2C,DENND1C,CDKN1C,ACVRL1,TOP2A,COL18A1,BTG2,WDR47,TMEM151B,PHF1,PTPRN,BRCA1,RCSD1,BRCA2,ARHGAP6,VSIR,PCSK4,LIMD2,KIF15,TUBA1B,FAM102A,MECOM,MMP28,TCP11L2,SH3BGRL3,FFAR2,PLEKHN1,TK1,FFAR1,CEP55,APC2,PSD,RMI2,PCYT1B,ACTL6B,IZUMO1,NME4,KIF22,IL17RD,RHOC,CBFA2T3,VAV1,APBB1IP,RAD51B,HCK,B3GNT9,TUBB2A,KIFC1,MMP15,KIT,CKS2,ARHGEF4,PLEKHO1,HCST,VAMP2,DBN1,MGLL,CD63,PHLPP1,PLPPR2,SLC43A3,PKN3,PTGER3,COL11A2,PAPLN,FAM129A,NPL,CENPA,FAM117A,TMEM71,RHD,PTGS1,MFSD4A,WIF1,ALOX5,LY6G6F,SLC16A1,SLC31A2,GINS3,SUSD1,GPR55,LAPTM5,TUBB4A,TMCO3,SPSB2,CYP2W1,ABI2,CCDC8,ETNK1,KLHL7,AGBL3,YPEL1,FOSB,RAMP1,YPEL3,FOXA3,CDKN3,CHPF,NCF2,TUSC3,RAB3D,TMEM140,GIMAP6,ETS1,CELSR3,CCND1,CEP250,TMEM38A,PIM2,SH2D6,PDE8A,PHLDA3,TGM2,ZBP1,KCNH2,RNF43,TLE2,TTC7B,ARID5A,MSH6,DCTD,ACAP3,OBSCN,MSH2,RAB36,RAB37,FAM185A,S100A6,ABCG1,RTN2,NOTCH2,NOTCH1,HPCA,GMPR,CACNA1A,PKMYT1,DTX4,FUT1,RAP1GAP,ZFP36L2,RHOBTB1,CCNB2,CCNB1,GRK2,BCL2L11,CALHM2,ZFP57,PGK1,FAM83D,MFAP3L,SLC14A1,CCDC18,STIL,SDF2L1,CBX5,DENND4B,HSPA5,UBE2C,VDR,OSBPL2,HMGA1,CRIM1,ISG15,SSC5D,ESRRG,ISG20,IFT20,CXCL10,EFNA3,GCLC,RGCC,CDK6,DLG4,BAMBI,UBE2T,RCAN2,CDK1,TAF4B,GNB5,TUBA8,LRP11,SNAP25,ONECUT3,DOCK8,TNFAIP2,ATP2A3,HMGB2,YBX2,NRARP,CELF6,ZC3H6,CTDSPL2,ITGAL,PIK3CG,NRGN,LMNB1,SPN,PIDD1,PSTPIP1,HHEX,LBH,ADGRE5,GM2A,EMILIN1,MYBL2,TOPBP1,HGFAC,HIST1H1C,EGFL7,SH2D3C,IQCD,SPTB,FGR,CCNA2,CREB3,IMPACT,NEMP2,TMBIM4,IRF1,ALDH1A1,IRF7,ATP6V1B2,BIRC5,LANCL3,SPACA6,NEMP1,CDH16,ST6GALNAC4,DTL,HEMGN,ACSS2,RGS14,PALM3,RSPH9,CXXC5,ADD3,THBS1,USP18,AURKB,NSL1,DLL3,AURKA,DLL4,E2F1,LRIG1,HES1,LRRC8E,E2F8,PLA2G2F,TRIM40,RRM1,DUT,LINGO3,RRM2,QPCTL,PLCL1,ARID3A,FBXL16,KLF4,MAPK11,FMNL1,RAD51,P2RX4,ALOX5AP,TRIM35,VIM,CD244","258","343.8","Cluster 2","Gfi1b","false","false","Cluster 3","Clustered","7.424987199180747","Clustered","7.327876984126984","ENSMUSG00000026815"
"1299","","",,,"Cluster 1","Sapcd2","false","false","Cluster 3","Clustered","8.0","Clustered","9.09090909090909","ENSMUSG00000026955"
"1809","","",,,"Cluster 3","Gng2","false","false","Cluster 3","Clustered","7.425","Clustered","11.733333333333333","ENSMUSG00000043004"
"1296","","",,,"Cluster 1","Gstm4","false","false","Cluster 3","Clustered","8.0","Clustered","10.0","ENSMUSG00000027890"
"1292","","",,,"Cluster 1","Cd1d1","false","false","Cluster 3","Clustered","7.822222222222222","Clustered","10.0","ENSMUSG00000028076"
"1288","","",,,"Cluster 3","Car6","false","false","Cluster 3","Clustered","7.5636363636363635","Clustered","10.694444444444445","ENSMUSG00000028972"
"1796","","",,,"Cluster 1","Ifit2","false","false","Cluster 3","Clustered","8.0","Clustered","10.0","ENSMUSG00000045932"
"260","","",,,"Cluster 2","Gm14321","false","false","Cluster 3","Clustered","7.418181818181818","Clustered","8.181818181818182","ENSMUSG00000084797"
"771","","",,,"Cluster 1","Asap3","false","false","Cluster 3","Clustered","8.318181818181818","Clustered","8.846153846153847","ENSMUSG00000036995"
"1282","","",,,"Cluster 1","Lrmp","false","false","Cluster 3","Clustered","7.5636363636363635","Clustered","9.454545454545455","ENSMUSG00000030263"
"1791","ARCHS4 Coexpression,1598;Enrichr Queries,234;GTEx Coexpression,155","CCNF,STMN3,MKI67,SOGA1,IGF1R,CCND1,KIF5C,DPYSL2,MYC,CHEK2,STMN1,PALM,GRB10,CEP250,PIEZO1,GTSE1,CD93,IGFBP4,VASH1,MAPK8IP2,CPT1C,RUNDC3A,TMEM130,CLIP3,TIAM1,ACAP3,CCNE2,GPRIN1,MAP1A,TYRO3,TSPYL4,ASF1B,BRSK1,NOTCH3,BEX2,DNMT1,NOTCH1,CACNA1B,CDCA7,CACNA1A,ABCB9,NREP,NUAK1,BCL2L11,MAP2,FIGNL1,MAP6,KIF3C,RAB6B,ST3GAL1,MAP9,B4GALNT4,ATP6V0A1,PACSIN1,NGFR,PRNP,MAGEE1,CADM1,VDR,FZD7,PLK1,CDC6,FBXO32,CDK6,UBE2T,REEP2,ITM2C,TOP2A,GPSM1,COL18A1,BTG2,HMGB2,NRARP,BRCA1,LMNB1,MAP1LC3A,FAM102A,SLC22A17,MCF2L,GDAP1L1,PBK,MYBL2,KIF1A,SULT4A1,APC2,CLUH,NAV1,SYP,MANEAL,SYN1,TUBB2A,ESPL1,INCENP,IRF1,ARHGEF4,BIRC5,MAPRE3,MCM5,MCM6,VAMP2,UHRF1,PELI3,CRMP1,LRP3,THBS1,AURKB,TCEAL5,SV2A,NT5DC2,LRIG1,APBB1,CCDC184,E2F7,GABBR2,RRM2,KCNIP3,ATAD2,SYT13,KLF4,SORL1,KBTBD6,MORN4,NFIB,PRC1,TRIM37,APBA1,VIM","748","662.3","Cluster 3","Zfp41","false","false","Cluster 3","Clustered","8.666666666666668","Clustered","12.142857142857142","ENSMUSG00000047003"
"1790","","",,,"Cluster 3","D030056L22Rik","false","false","Cluster 3","Clustered","9.230769230769232","Clustered","10.628571428571428","ENSMUSG00000047044"
"763","ARCHS4 Coexpression,261;Enrichr Queries,294;GTEx Coexpression,340","CHPF,IRS1,PROS1,GALNT18,AQP7,ETS1,RGS2,CCND1,DPYSL2,MYC,GJA4,CREB3L2,PDE8B,TGM2,IER3,PHLDA3,IL1R1,IGFBP4,IGFBP3,IGFBP2,ARID5B,P3H3,HSPG2,ADAM12,SIDT1,SERPING1,RELL2,MXRA7,MYL9,SDC4,NPR1,LPL,FBLN2,SLC9A3R2,NUAK1,CALHM2,GRK5,IGFBP7,ST3GAL1,RAI2,EGR2,TGFB2,AFAP1L1,CAV2,CRIM1,RAB39B,ARHGAP29,CDC7,INHBB,SSC5D,FBXO32,TRERF1,CORO2B,GADD45G,BMP4,CXCL10,NR4A3,RCAN2,ID4,ALPL,RGL3,AMOTL2,FGFR3,FERMT2,ITM2C,MXD4,CDKN1C,COL18A1,NRP1,BTG2,HSPB8,TGFB1I1,FHL1,TNFAIP2,PTPRM,HSPB1,ARHGAP6,LFNG,C1QTNF1,SH3PXD2A,TIMP2,ANXA6,TIMP3,EMILIN1,SCARF2,LMCD1,GPX3,MYOF,COPZ2,KLF15,CKAP4,PARD3B,MN1,MRAS,PLSCR4,ALDH1A1,ITGA5,GAS6,MGLL,LAMA4,GREB1L,NTN4,SEMA3G,PRELP,SNX33,CXXC5,THBS1,SLC7A2,AURKB,RASD1,SLIT1,LRIG1,GSN,NCKAP5L,CYP4B1,SORBS2,FMO2,KLF4,SORBS3,SLC4A8,NFIB,ACKR3,FOSB,VIM","205","298.3","Cluster 1","Atoh8","false","false","Cluster 3","Clustered","8.672727272727272","Clustered","8.351648351648352","ENSMUSG00000037621"
"1275","","",,,"Cluster 1","Rab6b","false","false","Cluster 3","Clustered","8.0","Clustered","10.0","ENSMUSG00000032549"
"1272","","",,,"Cluster 1","Qsox1","false","false","Cluster 3","Clustered","8.672727272727272","Clustered","8.846153846153847","ENSMUSG00000033684"
"1783","","",,,"Cluster 1","Mis18bp1","false","false","Cluster 3","Clustered","7.912087912087912","Clustered","9.21904761904762","ENSMUSG00000047534"
"1268","","",,,"Cluster 1","Aldh1b1","false","false","Cluster 3","Clustered","7.822222222222222","Clustered","10.0","ENSMUSG00000035561"
"1778","","",,,"Cluster 1","Palm3","false","false","Cluster 3","Clustered","8.0","Clustered","8.6","ENSMUSG00000047986"
"1777","","",,,"Cluster 1","Ldlrad3","false","false","Cluster 3","Clustered","8.076923076923077","Clustered","9.871794871794872","ENSMUSG00000048058"
"1776","","",,,"Cluster 1","Nwd1","false","false","Cluster 3","Clustered","7.822222222222222","Clustered","10.0","ENSMUSG00000048148"
"1772","","",,,"Cluster 1","Mrgpre","false","false","Cluster 3","Clustered","8.0","Clustered","8.6","ENSMUSG00000048965"
"1768","","",,,"Cluster 2","Rasl11b","false","false","Cluster 3","Clustered","7.822222222222222","Clustered","7.909090909090909","ENSMUSG00000049907"
"1254","","",,,"Cluster 1","Nlrp6","false","false","Cluster 3","Clustered","9.0","Clustered","9.242424242424242","ENSMUSG00000038745"
"1252","","",,,"Cluster 1","Capsl","false","false","Cluster 3","Clustered","8.0","Clustered","10.0","ENSMUSG00000039676"
"1758","","",,,"Cluster 1","Rgs14","false","false","Cluster 3","Clustered","8.0","Clustered","9.0","ENSMUSG00000052087"
"1244","","",,,"Cluster 1","Csdc2","false","false","Cluster 3","Clustered","8.836363636363636","Clustered","9.818181818181818","ENSMUSG00000042109"
"1756","ARCHS4 Coexpression,1383;Enrichr Queries,55;GTEx Coexpression,389","RAB3B,FOXA1,RORA,ETS1,CELSR3,PREX1,RGS2,CCND1,DPYSL2,CREB3L1,CHEK2,ADORA1,TCP11,CHGB,KCNH2,EPHA4,KCNH3,UNC5A,KCNH6,DNAAF3,IGFBP4,IGFBP3,IGFBP2,P3H3,TMEM130,FAM227A,OLFM1,RAB36,LMX1A,LGALS12,SCG5,SCG2,NUMBL,BEX2,MAGED1,CACNA1A,CACNA1H,RAP1GAP,GHRHR,NUAK1,PGBD5,MAP6,HIVEP3,NPTX1,RHBDL3,NPTX2,PLXNA4,ZBTB7C,KLHL29,NGFR,MYH7B,EGR2,TGFB2,CADM1,BDNF,LRRN2,FZD7,NFATC2,INHBB,ESRRG,FBXO32,CORO2B,SYT7,GADD45G,GNAO1,AHI1,NR4A3,PPP1R1B,ID4,SP6,MAGED2,FBXL2,FAT4,FGFR3,ITM2C,CDKN1C,PTPRU,BTG2,TENM4,PHF1,PTPRN,GRIK3,CELF5,HSPB1,CELF6,YBX2,NRARP,PCSK4,LFNG,SLC22A17,MCF2L,AVPR1B,WNT9A,PROX1,CBFA2T3,MN1,B3GNT9,VGF,KIT,MGLL,CAMK2B,HCN4,SMARCD3,COL11A2,CRMP1,ADCY1,CXXC5,THBS1,AURKB,RASD2,CAMK2N1,ATOH8,MAN1C1,LRIG1,SPOCK1,PAK3,P4HTM,RUNX1T1,RIC3,KCNB1,PCDH8,SYT13,KLF4,SORL1,SORBS3,GCK,BAIAP3,SLC4A8,TTC8,NFIB,RIMBP2,CFAP36,ACKR3,FOSB,INSM1,UNC79","675","609.0","Cluster 1","Foxo6","false","false","Cluster 3","Clustered","7.5636363636363635","Clustered","9.454545454545455","ENSMUSG00000052135"
"1755","","",,,"Cluster 1","Ankrd44","false","false","Cluster 3","Clustered","7.5636363636363635","Clustered","9.454545454545455","ENSMUSG00000052331"
"1242","","",,,"Cluster 1","2510009E07Rik","false","false","Cluster 3","Clustered","8.454545454545455","Clustered","10.333333333333334","ENSMUSG00000043391"
"1752","","",,,"Cluster 1","Ficd","false","false","Cluster 3","Clustered","7.822222222222222","Clustered","10.0","ENSMUSG00000053334"
"1239","","",,,"Cluster 1","Ccrl2","false","false","Cluster 3","Clustered","9.0","Clustered","10.0","ENSMUSG00000043953"
"1237","","",,,"Cluster 3","Rin3","false","false","Cluster 3","Clustered","9.0","Clustered","10.694444444444445","ENSMUSG00000044456"
"1748","","",,,"Cluster 1","Zfand2a","false","false","Cluster 3","Clustered","8.0","Clustered","9.0","ENSMUSG00000053581"
"1747","","",,,"Cluster 1","Taf4b","false","false","Cluster 3","Clustered","8.454545454545455","Clustered","9.428571428571429","ENSMUSG00000054321"
"1746","","",,,"Cluster 1","Kcnn4","false","false","Cluster 3","Clustered","9.0","Clustered","10.166666666666666","ENSMUSG00000054342"
"1234","","",,,"Cluster 1","Zfp36l2","false","false","Cluster 3","Clustered","8.308823529411764","Clustered","10.299999999999999","ENSMUSG00000045817"
"1745","","",,,"Cluster 1","Mgmt","false","false","Cluster 3","Clustered","8.0","Clustered","10.0","ENSMUSG00000054612"
"1744","","",,,"Cluster 3","Hmgb2","false","false","Cluster 3","Clustered","7.425","Clustered","11.076923076923077","ENSMUSG00000054717"
"1231","ARCHS4 Coexpression,487;Enrichr Queries,226;GTEx Coexpression,14","MDC1,ERCC6L,CCNF,BUB1B,MKI67,NOC2L,SMC4,SMC2,CDC20,LGALS3,CCND1,DPYSL2,MYC,CHEK1,STMN1,LONP1,FBXO5,GTSE1,TGM2,IER3,TIPIN,ESCO2,WDR76,TRAIP,CLDN6,NEIL3,MELK,DKC1,S100A6,KIF20B,PRR11,SQSTM1,PIF1,DNMT1,SHMT2,TROAP,CDCA7,NCAPG,SKA3,PKMYT1,IQGAP3,NCAPH,SKA1,RAD51AP1,CCNB2,CCNB1,RACGAP1,ORC1,PODXL,FIGNL1,PGK1,CLSPN,ECT2,PLK4,FANCI,PRNP,STIL,HSPA5,DDIAS,UBE2C,XRCC2,FZD7,PLK1,HMGA2,FANCB,CDC6,PALB2,FOSL1,TPX2,ANLN,UCK2,DIAPH3,NASP,UBE2T,CDK1,CALR,ITM2C,TOP2A,NCAPG2,KIF14,HMGB2,HSPB1,MCM10,BRCA1,KIF11,FOXM1,BRCA2,KIF15,LMNB1,TUBA1B,CHAF1A,TUBA1A,EXO1,NUF2,MYBL2,SH3BGRL3,SPDL1,TK1,TOPBP1,CEP55,HIST1H1C,NDC1,TCF19,TEAD4,HELLS,RMI2,RFC3,RFC4,CLUH,CKAP2,PLAUR,KIF23,MASTL,ETV4,CCNA2,MMS22L,ASPM,TUBB2A,INCENP,KIFC1,CKS2,MCM3,MCM4,BIRC5,MCM5,KIF2C,MCM6,MTFR2,GART,DTL,DBN1,MCM2,DTYMK,PCNA,UHRF1,PKN3,PRIM1,TTK,TYMS,CENPA,THBS1,AURKB,AURKA,NT5E,TCOF1,POLD1,NT5DC2,POLD2,LRIG1,E2F1,RAD54L,BUB1,E2F7,GINS1,RRM1,RRM2,MND1,NAP1L1,TICRR,CENPE,CENPF,MIS18A,RAD51,CENPH,CENPI,PRC1,IMPDH2,CENPM,TRIP13,VIM,SPC24,MAD2L1","152","242.3","Cluster 3","Hmga1","false","false","Cluster 3","Clustered","8.307692307692308","Clustered","11.733333333333333","ENSMUSG00000046711"
"1742","","",,,"Cluster 1","Klhl5","false","false","Cluster 3","Clustered","7.615384615384615","Clustered","8.461538461538462","ENSMUSG00000054920"
"1230","","",,,"Cluster 1","Cd24a","false","false","Cluster 3","Clustered","9.0","Clustered","8.461538461538462","ENSMUSG00000047139"
"1740","","",,,"Cluster 3","Cdca7","false","false","Cluster 3","Clustered","8.318181818181818","Clustered","10.694444444444445","ENSMUSG00000055612"
"1218","","",,,"Cluster 1","Mmp12","false","false","Cluster 3","Clustered","8.836363636363636","Clustered","9.818181818181818","ENSMUSG00000049723"
"1729","","",,,"Cluster 1","Adamts17","false","false","Cluster 3","Clustered","8.672727272727272","Clustered","9.09090909090909","ENSMUSG00000058145"
"1727","","",,,"Cluster 1","Nap1l1","false","false","Cluster 3","Clustered","7.912087912087912","Clustered","9.871794871794872","ENSMUSG00000058799"
"1725","","",,,"Cluster 3","Sh2d3c","false","false","Cluster 3","Clustered","8.748538011695906","Clustered","11.761904761904763","ENSMUSG00000059013"
"1212","","",,,"Cluster 1","Ffar4","false","false","Cluster 3","Clustered","9.0","Clustered","9.09090909090909","ENSMUSG00000054200"
"1721","","",,,"Cluster 1","Alox5ap","false","false","Cluster 3","Clustered","7.418181818181818","Clustered","10.0","ENSMUSG00000060063"
"1209","","",,,"Cluster 1","Gstp3","false","false","Cluster 3","Clustered","7.822222222222222","Clustered","10.0","ENSMUSG00000058216"
"1719","","",,,"Cluster 1","Cracr2a","false","false","Cluster 3","Clustered","8.318181818181818","Clustered","9.242424242424242","ENSMUSG00000061414"
"1206","","",,,"Cluster 1","Tor3a","false","false","Cluster 3","Clustered","7.644444444444445","Clustered","10.0","ENSMUSG00000060519"
"1205","","",,,"Cluster 1","Tnfrsf19","false","false","Cluster 3","Clustered","9.0","Clustered","10.0","ENSMUSG00000060548"
"1717","","",,,"Cluster 3","Ppp1r1b","false","false","Cluster 3","Clustered","9.230769230769232","Clustered","10.628571428571428","ENSMUSG00000061718"
"1712","","",,,"Cluster 1","Ifi27","false","false","Cluster 3","Clustered","7.615384615384615","Clustered","9.833333333333334","ENSMUSG00000064215"
"1199","","",,,"Cluster 1","Selenbp2","false","false","Cluster 3","Clustered","8.0","Clustered","10.0","ENSMUSG00000068877"
"1197","","",,,"Cluster 1","Lyz1","false","false","Cluster 3","Clustered","7.822222222222222","Clustered","10.0","ENSMUSG00000069515"
"685","","",,,"Cluster 1","Chd3os","false","false","Cluster 3","Clustered","9.0","Clustered","9.272727272727273","ENSMUSG00000043419"
"1703","","",,,"Cluster 1","Nt5dc2","false","false","Cluster 3","Clustered","7.425","Clustered","9.428571428571429","ENSMUSG00000071547"
"1188","","",,,"Cluster 1","Gm11027","false","false","Cluster 3","Clustered","7.5636363636363635","Clustered","9.454545454545455","ENSMUSG00000078984"
"1187","","",,,"Cluster 1","St6galnac4","false","false","Cluster 3","Clustered","8.0","Clustered","10.0","ENSMUSG00000079442"
"1186","","",,,"Cluster 1","Prrt4","false","false","Cluster 3","Clustered","7.822222222222222","Clustered","9.722222222222221","ENSMUSG00000079654"
"1698","","",,,"Cluster 1","2210011C24Rik","false","false","Cluster 3","Clustered","8.0","Clustered","9.0","ENSMUSG00000074217"
"1697","","",,,"Cluster 2","Spc24","false","false","Cluster 3","Clustered","7.5636363636363635","Clustered","7.909090909090909","ENSMUSG00000074476"
"1696","","",,,"Cluster 2","Mgst2","false","false","Cluster 3","Clustered","7.644444444444445","Clustered","7.636363636363637","ENSMUSG00000074604"
"1695","","",,,"Cluster 1","Ccl28","false","false","Cluster 3","Clustered","8.836363636363636","Clustered","9.871794871794872","ENSMUSG00000074715"
"1693","","",,,"Cluster 2","Gas2l3","false","false","Cluster 1","Clustered","7.0","Clustered","8.0","ENSMUSG00000074802"
"1692","","",,,"Cluster 1","B3galt5","false","false","Cluster 1","Clustered","6.805555555555555","Clustered","8.678571428571429","ENSMUSG00000074892"
"1177","","",,,"Cluster 2","Tekt4","false","false","Cluster 1","Clustered","7.0","Clustered","6.611111111111111","ENSMUSG00000024175"
"664","","",,,"Cluster 2","Pnma2","false","false","Cluster 1","Clustered","7.0","Clustered","7.555555555555555","ENSMUSG00000046204"
"1175","","",,,"Cluster 1","Unc5a","false","false","Cluster 1","Clustered","6.805555555555555","Clustered","9.0","ENSMUSG00000025876"
"1174","","",,,"Cluster 1","Rimbp2","false","false","Cluster 1","Clustered","7.0","Clustered","9.0","ENSMUSG00000029420"
"1686","","",,,"Cluster 1","Rad54b","false","false","Cluster 1","Clustered","6.533333333333333","Clustered","8.4","ENSMUSG00000078773"
"1172","","",,,"Cluster 1","Mmp15","false","false","Cluster 1","Clustered","7.151515151515151","Clustered","8.787878787878787","ENSMUSG00000031790"
"1681","","",,,"Cluster 1","1700122O11Rik","false","false","Cluster 1","Clustered","6.769230769230769","Clustered","8.787878787878787","ENSMUSG00000094928"
"1680","","",,,"Cluster 1","Tmem151b","false","false","Cluster 1","Clustered","6.533333333333333","Clustered","8.4","ENSMUSG00000096847"
"655","","",,,"Cluster 1","Ckap4","false","false","Cluster 1","Clustered","6.805555555555555","Clustered","9.0","ENSMUSG00000046841"
"1677","","",,,"Cluster 1","Flt3l","false","false","Cluster 1","Clustered","7.0","Clustered","9.0","ENSMUSG00000110206"
"653","ARCHS4 Coexpression,980;Enrichr Queries,276;GTEx Coexpression,535","IRS1,DIXDC1,RORA,SOGA1,IFIT3,IGF1R,MTBP,RGS2,CCND1,CDH2,KIF5C,DPYSL2,MYC,CHEK2,DPYSL3,STMN1,GRB10,RTTN,ZFP37,IER3,EPHA4,RBFOX3,IGFBP4,IGFBP3,ARID5B,MYT1,FAM227A,TIAM1,EML5,MAP1B,CACNA1A,NREP,NEUROD1,FAM221A,NUAK1,NPTX1,MYH10,NXNL2,PRNP,EGR2,TGFB2,FZD3,CADM1,FZD7,ZBTB10,CRIM1,ARHGAP29,BMP4,XKR7,CXCL10,IRAK1BP1,CDK6,XKR9,PKIA,ID4,XAF1,XKR4,MAP3K12,ITM2C,NRP1,TRIM72,BTG2,KCNC1,DIRAS2,HSPB1,RND3,UNC80,MMP24,PCLO,TUBA1A,SCRN1,CEP170,TRIM67,KLF12,HUNK,ETV1,PAX6,EMP2,ZDHHC15,MMS22L,TUBB2A,SETBP1,LCOR,DNAJC9,ASPA,OPRD1,RGS17,MLLT3,ADD3,THBS1,AURKB,NCALD,NT5E,CAMK2N1,USP1,LRIG1,SPOCK1,GABRD,RUNX1T1,CASP8AP2,KCNJ5,PCDHGC4,LHFPL5,KLHL3,KLF4,STXBP5L,MGAT4C,GPAM,GSTA4,SYT11,NFIB,FOSB,VIM,SSBP2,CBLN3","653","597.0","Cluster 2","Zfp30","false","false","Cluster 1","Clustered","7.0","Clustered","7.555555555555555","ENSMUSG00000047473"
"2188","Literature ChIP-seq,51;ARCHS4 Coexpression,842;ENCODE ChIP-seq,68;Enrichr Queries,243;ReMap ChIP-seq,251;GTEx Coexpression,959","MDC1,ANKLE1,STMN3,NOC2L,HTR4,CLDN1,ENO3,FAM122B,MILR1,MTBP,SAMD14,CREB3L4,MYC,MYB,STMN1,LIPG,CREB3L2,LIPK,GTSE1,IER3,UNC5A,BHLHA15,ISL1,SYTL2,CLDN6,EML5,GPR162,CLDN9,CLDN8,HOXB3,HOXB8,PRR11,PADI1,TSPYL4,PIF1,CDCA3,SHMT2,AGAP2,CDCA7,ENDOD1,SLCO5A1,IQGAP3,CRACR2B,RDH12,FIGNL1,ADAMTS17,S100A14,LHPP,BARD1,PLK4,GSTM3,GPR17,SIVA1,PLK1,EDEM2,PMM2,NFATC2,FOSL1,PKIB,XKR7,GJB2,GJB3,LYPD6B,CDK14,XKR5,BTG2,TGFB1I1,WFIKKN2,ATF7IP2,JPH1,LFNG,TUBA1B,CHAF1B,FAM102A,TUBA1A,MMP24,MECOM,TMEM44,PBK,TIMP3,SH3BGRL3,PLEKHN1,RSPO4,APC2,TCF19,TEAD4,HELLS,RMI2,CLUH,ARG1,SLC2A10,ROM1,MYOF,COPZ2,SERPINB9,F2,DDB2,TUBB2A,ANGPTL6,INCENP,KIFC1,CKS2,HCST,VAMP2,MGLL,PKN3,PELI2,SNX33,FSTL4,RHD,PROKR1,SLC17A9,TCOF1,CARNS1,USP1,GABRA2,LRRC26,CASP8AP2,SLC16A1,GSN,ATAD5,SYVN1,LAPTM5,CENPE,SMOC2,ABI2,CENPI,NFIB,FOSB,CENPN,CENPP,YPEL3,FRYL,NUCB2,UOX,RAB3B,SEMA5A,NRROS,TUSC3,RAB3D,GMNN,FRY,ALDH1L2,SLC8A1,ZFP30,CEP250,EPM2A,RNF43,TOR3A,IGFBP3,DIO1,IGFBP2,MITF,MYT1,TRAIP,ARMCX3,ACAP3,SLC9A5,OBSCN,ZFP41,S100A6,IGFALS,SLC25A53,SQSTM1,INTS6L,COL17A1,DNMT1,BLM,NOTCH1,HVCN1,FBXO48,AK4,PKMYT1,SLC9A3R2,NEUROD2,KLC3,BCL2L11,ITPRIPL1,ORC1,CLCA1,DRD3,MDN1,PLXNA4,FANCI,SLC14A1,SDF2L1,BTN2A2,AMBP,CCDC15,CXCL10,PTPRE,IRAK1BP1,CDK6,RGCC,REEP5,LHX1,RCAN2,CDK1,CPE,RNF183,CNIH2,CELF2,NRARP,MCM10,DUSP18,FOXM1,DUSP10,EMILIN1,ITGB7,CEP170,GAL3ST2,INSL5,BCAS1,RFC4,SH2D3C,HAUS4,KCNAB3,NEMP2,SAPCD2,ESPL1,ASPH,MCM3,BIRC5,MCM4,MCM5,MCM6,NEMP1,DCTPP1,ST6GALNAC4,DTL,MCM2,PRPS2,SMARCD3,UHRF1,SEMA3G,TTK,SLC5A10,CXXC5,PPM1E,NSL1,ABLIM1,P2RY2,RNF39,E2F1,LRRC8E,SEC11C,AHNAK2,IRX4,SYT16,FBXL16,KLF4,TSPAN13,PRC1,SYT11,RAB15,IMPDH2,TRIM35,TRIM37,SLC25A35,IFITM3,LRR1,GFI1,SLC35B1,CCNF,MKI67,CDC20,LGALS3,SYNPR,C1GALT1C1,RINL,CHEK2,NIPAL2,CHEK1,LONP1,TNFSF10,PIEZO1,DPF3,TNS4,GLUL,HABP2,FBXO9,IL1R1,P3H3,CPT1C,MAPK8IP1,MXRA7,ZG16,DNA2,STX1A,SDC4,MGST2,APCDD1,TRPM2,PGBD5,INPP5D,STC2,FAM43A,ZBED3,EGR2,SLC33A1,NBEAL2,RAB27B,GADD45G,TPX2,ANLN,PDE3A,LRRN1,CALR,C2CD2L,TOP2A,SUV39H2,COL18A1,NRP2,CD40,PTPRR,TMEM151B,TENM4,ZFAND2A,DIRAS2,BRCA1,BRCA2,CX3CL1,SLC22A15,MIS18BP1,CLDN23,DNER,IDS,QSOX2,PSD,IZUMO4,WARS,KIF22,TUBG2,IL17RD,RENBP,SYN2,VAV1,RAD51B,RNF144B,MDFIC,ARHGEF4,KIF2C,TLR6,SYNC,PDZRN3,SGK2,DBN1,PCNA,SLC43A3,PRIM1,TYMS,PHYHIP,PSMC3IP,WIF1,RPRML,SLC31A2,SUSD1,KRT10,ALDH4A1,CYP2W1,CMSS1,TRIP13,MAD2L1,MEGF9,ERCC6L,DSCC1,GALNT18,BUB1B,OTP,TTF2,NR3C1,ETS1,IGF1R,CNDP2,RDM1,RGS2,CCND1,TGM2,LIG1,ARID5A,ARID5B,MUC3A,MPEG1,TANC2,PLA2G15,PROCR,ERN2,DKC1,SIDT1,GEMIN5,CARD11,RTN2,NDRG4,NPR1,SLC41A2,ARHGAP19,LPL,FUT2,ZFP36L2,SYCE2,CCNB2,CCNB1,TMEM245,GRK2,SCUBE1,HRH3,GRK5,CLSPN,ECT2,MARK1,PRNP,STIL,TGFB2,CBX5,DENND4B,HSPA5,UBE2C,HMGA1,CRIM1,HMGA2,ARHGAP29,ISG15,SSC5D,MT4,POU2F3,ARHGAP24,IFT20,ISG20,AHI1,SDK1,EFNA3,DLG4,FES,TAF4B,MXD4,HMGB2,ATP2A3,HSPB1,YBX2,RND3,LMNB1,PIDD1,ADGRE5,MYBL2,SCARF2,EGFL7,TGIF2,MMP7,ABCC8,PLAUR,PPP2R5B,NAV1,AXIN2,UPK3B,KLF15,PRODH2,CCNA2,FGR,CREB3,CCNA1,ADGRF1,VGF,IRF1,GNB1L,CDHR5,DOCK2,DDC,RGS14,RGS16,ASAP3,ADD3,THBS1,AURKB,NCALD,AURKA,DLL4,MUC2,CHSY1,POLD1,POLD2,LRIG1,SLIT1,NRIP3,HES1,NCAM2,ATOH1,GALNT5,RRM2,ARID3A,TICRR,MLPH,ALOX5AP,VIM,TEK","330","402.3","Cluster 2","Myc","false","false","Cluster 1","Clustered","7.311653116531165","Clustered","7.161790017211704","ENSMUSG00000022346"
"1675","","",,,"Cluster 2","Th","false","false","Cluster 1","Clustered","6.805555555555555","Clustered","8.0","ENSMUSG00000000214"
"650","","",,,"Cluster 2","Stbd1","false","false","Cluster 1","Clustered","7.0","Clustered","7.555555555555555","ENSMUSG00000047963"
"1160","","",,,"Cluster 2","Fam183b","false","false","Cluster 1","Clustered","6.805555555555555","Clustered","7.288888888888889","ENSMUSG00000049154"
"1158","","",,,"Cluster 2","Eml1","false","false","Cluster 1","Clustered","7.0","Clustered","7.111111111111111","ENSMUSG00000058070"
"1154","","",,,"Cluster 1","Wnt3","false","false","Cluster 1","Clustered","6.533333333333333","Clustered","8.4","ENSMUSG00000000125"
"1153","","",,,"Cluster 2","Spag5","false","false","Cluster 1","Clustered","6.533333333333333","Clustered","6.9818181818181815","ENSMUSG00000002055"
"1661","","",,,"Cluster 1","Kdelr3","false","false","Cluster 1","Clustered","7.151515151515151","Clustered","8.345454545454546","ENSMUSG00000010830"
"1660","","",,,"Cluster 1","Klhl3","false","false","Cluster 1","Clustered","6.871794871794871","Clustered","10.0","ENSMUSG00000014164"
"2170","","",,,"Cluster 1","Cdc6","false","false","Cluster 1","Clustered","6.805555555555555","Clustered","9.0","ENSMUSG00000017499"
"1146","","",,,"Cluster 1","Nasp","false","false","Cluster 1","Clustered","7.0","Clustered","9.0","ENSMUSG00000028693"
"1143","","",,,"Cluster 1","Celf5","false","false","Cluster 1","Clustered","7.0","Clustered","9.0","ENSMUSG00000034818"
"1652","","",,,"Cluster 2","Peli2","false","false","Cluster 1","Clustered","7.03030303030303","Clustered","7.909090909090909","ENSMUSG00000021846"
"1140","","",,,"Cluster 2","Tph1","false","false","Cluster 1","Clustered","6.805555555555555","Clustered","8.2","ENSMUSG00000040046"
"627","","",,,"Cluster 2","Sstr5","false","false","Cluster 1","Clustered","7.0","Clustered","7.555555555555555","ENSMUSG00000050824"
"1138","","",,,"Cluster 1","Lonp1","false","false","Cluster 1","Clustered","6.805555555555555","Clustered","9.0","ENSMUSG00000041168"
"1649","","",,,"Cluster 1","Sdf2l1","false","false","Cluster 1","Clustered","6.533333333333333","Clustered","8.678571428571429","ENSMUSG00000022769"
"1135","","",,,"Cluster 1","Pabpc1l","false","false","Cluster 1","Clustered","7.0","Clustered","9.0","ENSMUSG00000054582"
"1134","","",,,"Cluster 2","Alms1","false","false","Cluster 1","Clustered","6.805555555555555","Clustered","8.2","ENSMUSG00000063810"
"622","ARCHS4 Coexpression,100;Enrichr Queries,92;GTEx Coexpression,565","CNTFR,NCF2,GFI1,AQP9,STMN3,CELSR3,RGS4,PREX1,RINL,IL18RAP,KIF5C,BASP1,DPYSL2,MYC,DPYSL3,MYB,PALM,PLXNC1,THSD7A,CHGB,EPHA4,SEMA6C,KCNH7,IGFBP2,APLP1,ISL1,RUNDC3A,MYT1,OLFM1,CLDN9,MFNG,MAP1B,LGALS12,RBP1,SCG2,NUMBL,BRSK2,KHDRBS3,CACNA1A,NREP,PKMYT1,CPLX2,NEUROD1,TRPM2,NEUROD2,SCUBE1,MAP2,MAP6,RHBDL3,NPTX2,SCN3A,ST3GAL2,ASIC1,NGFR,EGR2,TGFB2,CARMIL3,BTBD17,BDNF,ESRRG,CORO2B,SYT7,ST18,GADD45G,XKR7,EFNA3,NR4A3,KLHDC8A,LHX1,REEP2,ID4,ALPL,XKR4,CNIH2,FGFR3,GPR27,CDKN1C,SNAP25,BTG2,KCNC1,TENM4,ONECUT3,NCAN,CELF5,VSIR,PIK3CG,LIMD2,GRM2,PSTPIP1,TUBA1A,GDAP1L1,DNER,FFAR3,FFAR2,NEFM,CD53,APC2,TMED8,TPSG1,PPP2R5B,PAX6,NAV1,FAM219A,SYP,PROX1,MANEAL,ETV4,CBFA2T3,VAV1,APBB1IP,FGR,HCK,KIT,TLR6,DBN1,RGS16,LENG9,GREB1L,CRMP1,NPL,THBS1,TMEM163,AURKB,DLL3,AGPAT4,RASD2,CECR2,GPR153,ALOX5,SPOCK2,E2F1,LRIG1,SLIT1,MSX1,LY6G6F,HES5,RUNX1T1,CHGA,GDF11,LINGO3,SLC31A2,PCDH8,LAPTM5,ARID3A,SYT13,KLF4,SORL1,POU4F1,DLK1,MAB21L3,CENPF,NFASC,TPPP3,MORN4,NFIB,RAB15,NOVA2,ALOX5AP,FOSB,VIM,INSM1","158","252.3","Cluster 1","Nhlh1","false","false","Cluster 1","Clustered","7.0","Clustered","9.0","ENSMUSG00000051251"
"621","","",,,"Cluster 2","Ffar2","false","false","Cluster 1","Clustered","6.611111111111111","Clustered","7.555555555555555","ENSMUSG00000051314"
"1644","","",,,"Cluster 1","Col17a1","false","false","Cluster 1","Clustered","7.2727272727272725","Clustered","9.454545454545455","ENSMUSG00000025064"
"2154","ARCHS4 Coexpression,868;Enrichr Queries,376;ReMap ChIP-seq,143;GTEx Coexpression,339","EHF,AQP7,STMN3,SLC4A4,CLDN1,TMEM92,LGALS3,MCIDAS,CREB3L4,CHEK2,MYC,LIPH,MYB,RASSF6,LONP1,PIEZO1,PIP4K2A,EPHA4,UNC5A,IL1R1,CTRB1,KCNK16,BHLHA15,SLC51A,PLPP5,CLPS,CLDN9,RBP1,CFTR,SDC4,STXBP1,PLA2G3,STC1,NCAPH,FAM221A,CRACR2B,INPP5D,S100A13,S100A14,KCNN4,TSPAN1,EGR2,SIVA1,CADM1,FZD7,SLC33A1,EIF2AK3,SLC16A12,OSGIN1,CDC6,FA2H,MYO5C,SPATS2L,C2CD2L,FKBP11,MESP2,NRP1,COL18A1,BTG2,KCNC1,ICA1,TFCP2L1,HERPUD1,SERP1,UCN3,MECOM,IMPA2,TIMP3,TMED6,AVPR1B,KCND3,PAX6,PROX1,VAV1,BACE1,B3GNT6,PITPNM3,KIT,KCNMA1,TFF2,CHST4,PLPPR2,PELI2,SLC43A1,FAM129A,CENPA,PTGS1,HSD17B2,GCNT3,SPTSSB,CAP2,RUNX1T1,LRRC26,SYVN1,LHFPL5,GCG,FMO5,GUCA2A,ALDH4A1,GSTA4,NFIB,GSTA2,KRT15,GSTA1,NUCB2,FOXA3,YPEL3,FOXA1,KLB,STEAP3,CHRM1,ANKRD35,ZWILCH,IRS1,RAB3D,GMNN,RORA,NR3C1,ETS1,HID1,SYDE2,RGS2,ARHGAP40,CCND1,GRB10,TGM2,SPINK4,CPA2,RNF43,KIRREL2,G6PC,IGFBP4,IGFBP3,IGFBP2,TTC7B,ARID5B,OLFM4,TANC2,SELENOM,RAB36,SIDT1,NUPR1,CPB2,NOTCH1,GPR119,UBA5,SLC1A1,GLIS3,FUT2,FUT1,GRK2,CALHM2,ITPRIPL1,PRNP,TGFB2,AMBP,VDR,HMGA1,HMGA2,INHBB,ESRRG,IFT20,BMP4,CXCL10,DAP,EFNA3,REEP5,PNLIPRP1,PNLIPRP2,PSCA,CELF2,CHTF18,RND3,HHEX,BDKRB2,ITGB7,A4GALT,HGFAC,BCAS1,KLF12,TGIF2,LIX1L,ETV1,SSTR3,DNAJC3,IRF1,GNB1L,LTK,DDC,ACSS2,PRELP,HSD17B13,THBS1,THSD4,AURKB,CHSY1,ATOH8,SLITRK6,LRIG1,DNAJB9,HES1,SLIT2,CYB5A,DUT,KCNIP3,SPAG4,KLF4,SORL1,TTC39A,TRIM37,VIM,KCNK2","390","431.5","Cluster 4","Nr5a2","false","false","Cluster 1","Clustered","6.4735632183908045","Clustered","6.2924731182795695","ENSMUSG00000026398"
"1126","","",,,"Cluster 1","Gmpr","false","false","Cluster 1","Clustered","7.0","Clustered","9.0","ENSMUSG00000000253"
"2150","","",,,"Cluster 1","Gm2a","false","false","Cluster 1","Clustered","7.2727272727272725","Clustered","8.58974358974359","ENSMUSG00000000594"
"2149","","",,,"Cluster 2","Pcbp3","false","false","Cluster 1","Clustered","7.0","Clustered","7.111111111111111","ENSMUSG00000001120"
"1636","","",,,"Cluster 2","Snap25","false","false","Cluster 1","Clustered","7.0","Clustered","8.0","ENSMUSG00000027273"
"612","","",,,"Cluster 1","Arhgef15","false","false","Cluster 1","Clustered","7.0","Clustered","9.0","ENSMUSG00000052921"
"2145","","",,,"Cluster 1","Scin","false","false","Cluster 1","Clustered","7.0","Clustered","9.0","ENSMUSG00000002565"
"2144","","",,,"Cluster 1","Chaf1a","false","false","Cluster 1","Clustered","6.9485294117647065","Clustered","8.8","ENSMUSG00000002835"
"2143","","",,,"Cluster 1","Mcm2","false","false","Cluster 1","Clustered","6.805555555555555","Clustered","9.0","ENSMUSG00000002870"
"1630","","",,,"Cluster 1","Mt4","false","false","Cluster 1","Clustered","6.9743589743589745","Clustered","9.09090909090909","ENSMUSG00000031757"
"1118","","",,,"Cluster 2","Tubb5","false","false","Cluster 1","Clustered","7.0","Clustered","7.555555555555555","ENSMUSG00000001525"
"1629","","",,,"Cluster 1","Mt3","false","false","Cluster 1","Clustered","6.805555555555555","Clustered","9.0","ENSMUSG00000031760"
"1628","","",,,"Cluster 1","Kifc3","false","false","Cluster 1","Seed","8.0","Clustered","9.444444444444445","ENSMUSG00000031788"
"604","","",,,"Cluster 1","Oas1f","false","false","Cluster 1","Clustered","6.533333333333333","Clustered","8.4","ENSMUSG00000053765"
"1627","","",,,"Cluster 2","Tmem38a","false","false","Cluster 1","Clustered","6.533333333333333","Clustered","7.466666666666667","ENSMUSG00000031791"
"2137","ARCHS4 Coexpression,665;Enrichr Queries,594;GTEx Coexpression,626","IFITM3,CD83,NRROS,FAM89A,ETS1,IFIT3,IFIT2,LGALS3,RGS2,CCND1,BASP1,MYC,DPYSL2,LONP1,LIPK,IER3,TGM2,MYLIP,CD93,RSAD2,IGFBP4,IGFBP3,ARID5A,ARID5B,FRMD4A,KCNQ1,S100A6,RIN3,NUPR1,AKNA,SDC4,NPR1,NOTCH4,LPL,APCDD1,ZFP36L2,FUT4,KLC3,GRK2,INPP5D,FAM43A,WNT3,SLC19A2,PRNP,EGR2,HSPA5,DENND4B,NFATC2,ISG15,NBEAL2,POU2F3,GADD45G,FOSL1,ISG20,CXCL10,PTPRE,NR4A3,RGCC,GJB3,LYPD6B,ID4,ITM2C,BTG2,PHF1,DOCK8,TNFAIP2,ATP2A3,HSPB1,NRARP,RND3,TUBA1A,ADGRE5,BDKRB2,TIMP3,EMB,HIST1H1C,GPX3,TNFRSF19,PLAUR,GPBAR1,IRF1,ALDH1A1,IRF7,DOCK2,PLCB2,MCM2,RGS16,NLRC3,THBS1,AURKB,RASD1,CHSY1,RNF39,LRIG1,SPTSSB,RRM2,GSN,KRT10,KLF4,FMNL1,VIM","700","628.3","Cluster 2","Fosb","false","false","Cluster 1","Clustered","6.987987987987988","Clustered","6.987987987987988","ENSMUSG00000003545"
"2136","","",,,"Cluster 1","Ssbp2","false","false","Cluster 1","Clustered","7.0","Clustered","10.0","ENSMUSG00000003992"
"599","","",,,"Cluster 1","Adam12","false","false","Cluster 1","Clustered","7.0","Clustered","9.0","ENSMUSG00000054555"
"1622","","",,,"Cluster 1","Mif","false","false","Cluster 1","Clustered","7.0","Clustered","9.0","ENSMUSG00000033307"
"2134","","",,,"Cluster 1","Zfp287","false","false","Cluster 1","Clustered","6.805555555555555","Clustered","10.0","ENSMUSG00000005267"
"1110","","",,,"Cluster 2","Fkbp11","false","false","Cluster 1","Clustered","7.0","Clustered","7.0","ENSMUSG00000003355"
"598","","",,,"Cluster 1","Ugt2b5","false","false","Cluster 1","Clustered","7.0","Clustered","9.0","ENSMUSG00000054630"
"1109","","",,,"Cluster 2","Rab3b","false","false","Cluster 1","Clustered","7.0","Clustered","7.555555555555555","ENSMUSG00000003411"
"1618","","",,,"Cluster 1","Pla2g3","false","false","Cluster 1","Clustered","7.03030303030303","Clustered","8.636363636363637","ENSMUSG00000034579"
"591","","",,,"Cluster 2","Unc80","false","false","Cluster 1","Clustered","6.805555555555555","Clustered","7.777777777777778","ENSMUSG00000055567"
"1102","","",,,"Cluster 1","Tek","false","false","Cluster 1","Clustered","7.0","Clustered","9.0","ENSMUSG00000006386"
"1613","","",,,"","Pdzrn3","false","false","Cluster 1","Clustered","6.611111111111111","Unclustered","5.8545454545454545","ENSMUSG00000035357"
"2124","","",,,"Cluster 2","Trpm2","false","false","Cluster 1","Clustered","7.0","Clustered","7.555555555555555","ENSMUSG00000009292"
"2122","","",,,"Cluster 1","Rdm1","false","false","Cluster 1","Clustered","6.805555555555555","Clustered","9.0","ENSMUSG00000010362"
"1609","","",,,"Cluster 2","Gch1","false","false","Cluster 1","Clustered","6.564102564102564","Clustered","7.021978021978022","ENSMUSG00000037580"
"2119","","",,,"Cluster 2","Slc9a5","false","false","Cluster 1","Clustered","6.593406593406593","Seed","8.241758241758241","ENSMUSG00000014786"
"580","","",,,"Cluster 2","Mia3","false","false","Cluster 1","Clustered","6.805555555555555","Clustered","6.836363636363636","ENSMUSG00000056050"
"1603","","",,,"Cluster 1","38047","false","false","Cluster 1","Clustered","6.805555555555555","Clustered","9.0","ENSMUSG00000039372"
"2112","","",,,"Cluster 1","Igfbp4","false","false","Cluster 1","Clustered","7.0","Clustered","9.0","ENSMUSG00000017493"
"2110","","",,,"Cluster 1","Birc5","false","false","Cluster 1","Clustered","6.871794871794871","Clustered","8.93939393939394","ENSMUSG00000017716"
"1594","","",,,"Cluster 1","Nme9","false","false","Cluster 1","Clustered","6.805555555555555","Clustered","9.0","ENSMUSG00000046242"
"570","","",,,"Cluster 1","Camk2b","false","false","Cluster 1","Clustered","7.0","Clustered","9.0","ENSMUSG00000057897"
"1081","","",,,"Cluster 1","Tns4","false","false","Cluster 1","Clustered","6.805555555555555","Clustered","9.0","ENSMUSG00000017607"
"2105","","",,,"Cluster 2","Psmc3ip","false","false","Cluster 1","Clustered","7.2727272727272725","Clustered","8.181818181818182","ENSMUSG00000019303"
"2102","","",,,"Cluster 1","Lrp11","false","false","Cluster 1","Clustered","7.275","Clustered","9.871794871794872","ENSMUSG00000019796"
"1590","","",,,"Cluster 1","C1galt1c1","false","false","Cluster 1","Clustered","6.533333333333333","Clustered","9.0","ENSMUSG00000048970"
"563","","",,,"Cluster 1","Nhs","false","false","Cluster 1","Clustered","7.0","Clustered","9.0","ENSMUSG00000059493"
"1074","ARCHS4 Coexpression,1401;Enrichr Queries,70;GTEx Coexpression,1442","ZFAND4,MKI67,ENO3,CELSR3,CDC20,CCND1,KIF5C,DPYSL2,MYC,CHEK2,PALM,MYB,LONP1,TCP11,IER3,TLE2,IGFBP4,IGFBP3,IGFBP2,ZC2HC1C,LGALS12,S100A6,NGEF,ASF1B,CDCA3,CACNA1A,LPL,FOXO6,CACNA1H,RAP1GAP,CCNB1,STC2,NPTX2,PACSIN1,MYH7B,NGFR,EGR2,UBE2C,PLK1,SYT7,GADD45G,TPX2,CXCL10,ANLN,MYO5C,PPP1R1B,CDK1,ALPL,FGFR3,ITM2C,TTC25,TOP2A,RET,ATP2A3,HMGB2,HSPB1,NRARP,KIF11,PCSK4,IMPA2,EFHD1,MYBL2,TK1,KIF1A,IZUMO4,CLUH,GPX3,ELOVL2,IQCD,SYNGR4,ETV4,KLF15,CCNA2,ASPM,VGF,MMP15,KIT,BIRC5,KIF2C,CDHR5,CAMK2B,UHRF1,RGS16,THBS1,AURKB,AURKA,RASD2,RASD1,CAMK2N1,LRIG1,RRM2,GSN,KLF4,SORL1,SORBS3,CENPF,ALMS1,VIM,BRDT,CDKN3","1152","971.0","Cluster 2","Ybx2","false","false","Cluster 1","Clustered","7.0","Clustered","7.0","ENSMUSG00000018554"
"1584","","",,,"Cluster 1","Stum","false","false","Cluster 1","Clustered","6.805555555555555","Clustered","9.0","ENSMUSG00000053963"
"1072","","",,,"Cluster 1","Copz2","false","false","Cluster 1","Clustered","7.0","Clustered","9.0","ENSMUSG00000018672"
"1582","","",,,"Cluster 1","Ccdc18","false","false","Cluster 1","Clustered","6.805555555555555","Clustered","9.0","ENSMUSG00000056531"
"2093","","",,,"Cluster 1","Pold2","false","false","Cluster 1","Clustered","7.0","Clustered","9.0","ENSMUSG00000020471"
"1069","","",,,"Cluster 1","Rps6kl1","false","false","Cluster 1","Clustered","7.0","Clustered","9.0","ENSMUSG00000019235"
"1068","","",,,"","Rgs17","false","false","Cluster 1","Clustered","7.0","Unclustered","6.416666666666666","ENSMUSG00000019775"
"554","","",,,"Cluster 1","Tnfaip8","false","false","Cluster 1","Clustered","7.0","Clustered","9.0","ENSMUSG00000062210"
"1578","","",,,"Cluster 2","Nptx2","false","false","Cluster 1","Clustered","6.805555555555555","Clustered","8.0","ENSMUSG00000059991"
"2089","","",,,"Cluster 1","Rrm2","false","false","Cluster 1","Clustered","6.417582417582418","Clustered","8.787878787878787","ENSMUSG00000020649"
"1576","","",,,"Cluster 2","Vrk2","false","false","Cluster 1","Clustered","7.0","Clustered","7.555555555555555","ENSMUSG00000064090"
"1063","","",,,"Cluster 2","1700040L02Rik","false","false","Cluster 1","Clustered","6.805555555555555","Clustered","6.836363636363636","ENSMUSG00000019945"
"2085","","",,,"Cluster 1","Atp2a3","false","false","Cluster 1","Clustered","7.0","Clustered","9.0","ENSMUSG00000020788"
"1061","","",,,"Cluster 2","Mtfr2","false","false","Cluster 1","Clustered","7.0","Clustered","7.333333333333333","ENSMUSG00000019992"
"1573","","",,,"Cluster 1","Slc35g2","false","false","Cluster 1","Clustered","6.805555555555555","Clustered","9.0","ENSMUSG00000070287"
"2083","","",,,"Cluster 1","Rflnb","false","false","Cluster 1","Clustered","7.2727272727272725","Clustered","10.0","ENSMUSG00000020846"
"1056","","",,,"Cluster 1","Ptprr","false","false","Cluster 1","Clustered","7.0","Clustered","9.0","ENSMUSG00000020151"
"2080","","",,,"Cluster 1","Pik3r5","false","false","Cluster 1","Clustered","6.9743589743589745","Clustered","8.717948717948719","ENSMUSG00000020901"
"1567","","",,,"Cluster 1","Slco5a1","false","false","Cluster 1","Clustered","7.0","Clustered","9.0","ENSMUSG00000025938"
"1566","","",,,"Cluster 3","Nrp2","false","false","Cluster 1","Clustered","6.9743589743589745","Clustered","10.694444444444445","ENSMUSG00000025969"
"1565","","",,,"Cluster 1","Olfm1","false","false","Cluster 1","Clustered","7.0","Clustered","9.0","ENSMUSG00000026833"
"2075","","",,,"Cluster 1","Cenpp","false","false","Cluster 1","Clustered","6.805555555555555","Clustered","10.0","ENSMUSG00000021391"
"1047","","",,,"Cluster 1","Cfap36","false","false","Cluster 1","Clustered","7.0","Clustered","9.0","ENSMUSG00000020462"
"2070","","",,,"Cluster 2","Ero1l","false","false","Cluster 1","Clustered","6.4","Clustered","8.241758241758241","ENSMUSG00000021831"
"534","ARCHS4 Coexpression,11;Enrichr Queries,31;GTEx Coexpression,172","GFI1,STMN3,SOGA1,DPYSL2,MYC,CHEK2,DPYSL3,MYB,THSD7A,CHGB,EPHA4,CACNA2D1,KCNK16,P3H3,CPT1C,VWA5B2,ISL1,MAPK8IP1,CLDN9,MAP1B,LGALS12,KCTD12,MXRA7,STX1A,BEX2,MAGED1,STXBP1,GHRHR,TRPM2,PCBP3,MAP2,NHLH1,MAP6,RHBDL3,SCN3A,NKX2-2,EGR2,FZD3,CARMIL3,CADM1,BTBD17,DCLK1,ST18,GADD45G,XKR7,KLHDC8A,ID4,FXYD6,CD200,CDKN1C,PTPRU,PCSK1,BTG2,TENM3,KCNC1,PTPRN,GRIK3,PCLO,TUBA1A,UCN3,SLC22A17,DNER,FFAR4,NEFM,QSOX2,KIF1A,FFAR1,APC2,RPS6KL1,ACTL6B,AVPR1B,TPSG1,PAX6,MANEAL,PROX1,SYP,CBFA2T3,MN1,KIT,KCNMA1,PDZRN3,COL11A2,CRYBA2,SEZ6,ADCY1,TMEM163,TCEAL5,GPR153,CAMK2N1,PAK3,P4HTM,RUNX1T1,RIC3,GDF11,LHFPL4,PNMA2,POU4F1,GCK,NFIB,RIMBP2,SARM1,FOSB,RAB3B,FOXA1,TUSC3,CELSR3,SCGN,RGS2,CDH2,KIF5C,BASP1,PLXNC1,KCNH2,CASR,KIRREL2,KCNH6,TMEM178B,IGFBP3,APLP1,ANXA10,MYT1,RUNDC3A,ACAP3,OLFM1,LMX1A,GPRIN1,SCG5,SCG3,SCG2,BRSK2,CACNA1B,FOXO6,CACNA1A,LPL,NREP,PKMYT1,CPLX2,CACNA1H,NEUROD1,IGSF21,NPTX1,NPTX2,TAC1,ASIC1,PRNP,SYT1,BDNF,INHBB,ESRRG,SYT7,GNAO1,AHI1,CXCL10,PLCXD3,LHX1,CPE,CNIH2,FGFR3,MXD4,SNAP25,ATP2A3,CELF5,SYNE4,UNC80,MCF2L,GDAP1L1,ABCC8,NAV1,SSTR3,VGF,RASA4,CAMK2B,DDC,RGS16,CRMP1,THBS1,PPM1E,AURKB,DLL3,RASD1,GNG4,SPOCK2,LRIG1,SPOCK1,SEC11C,CHGA,RRM2,PCDH8,CADPS,SYT14,SYT13,KLF4,DLK1,BAIAP3,SLC4A8,NFASC,SST,NOVA2,UNC79","22","71.33","Cluster 2","Insm1","false","false","Cluster 1","Clustered","6.916073968705548","Clustered","6.916073968705548","ENSMUSG00000068154"
"1045","","",,,"Cluster 2","Pdia6","false","false","Cluster 1","Clustered","6.805555555555555","Clustered","7.111111111111111","ENSMUSG00000020571"
"2069","","",,,"Cluster 1","Rnase4","false","false","Cluster 1","Clustered","7.080882352941177","Clustered","8.654411764705882","ENSMUSG00000021876"
"2068","","",,,"Cluster 1","Slc25a30","false","false","Cluster 1","Clustered","6.769230769230769","Clustered","8.461538461538462","ENSMUSG00000022003"
"2065","","",,,"Cluster 3","Fyb","false","false","Cluster 1","Clustered","7.2727272727272725","Clustered","10.694444444444445","ENSMUSG00000022148"
"1553","","",,,"Cluster 2","Padi2","false","false","Cluster 1","Clustered","7.0","Clustered","8.0","ENSMUSG00000028927"
"2063","","",,,"Cluster 1","Nadk2","false","false","Cluster 1","Clustered","6.871794871794871","Clustered","8.93939393939394","ENSMUSG00000022253"
"1037","","",,,"Cluster 1","Myh10","false","false","Cluster 1","Clustered","6.533333333333333","Clustered","8.678571428571429","ENSMUSG00000020900"
"525","","",,,"Cluster 1","Htr1d","false","false","Cluster 1","Clustered","6.805555555555555","Clustered","9.0","ENSMUSG00000070687"
"524","","",,,"Cluster 2","Cecr2","false","false","Cluster 1","Clustered","6.533333333333333","Clustered","7.777777777777778","ENSMUSG00000071226"
"1034","","",,,"Cluster 2","Smoc1","false","false","Cluster 1","Clustered","6.805555555555555","Clustered","7.777777777777778","ENSMUSG00000021136"
"519","","",,,"Cluster 1","Fndc1","false","false","Cluster 1","Clustered","7.0","Clustered","9.0","ENSMUSG00000071984"
"2055","","",,,"Cluster 1","Ncam2","false","false","Cluster 1","Clustered","6.611111111111111","Clustered","9.0","ENSMUSG00000022762"
"2052","","",,,"Cluster 1","Pros1","false","false","Cluster 1","Clustered","6.805555555555555","Clustered","9.0","ENSMUSG00000022912"
"1540","","",,,"Cluster 2","Gprin1","false","false","Cluster 1","Clustered","7.0","Clustered","8.0","ENSMUSG00000069227"
"1539","","",,,"Cluster 1","Ccdc92b","false","false","Cluster 1","Clustered","7.0","Clustered","9.0","ENSMUSG00000069814"
"1027","","",,,"Cluster 1","Cep72","false","false","Cluster 1","Clustered","7.0","Clustered","9.0","ENSMUSG00000021572"
"2051","","",,,"Cluster 1","Chaf1b","false","false","Cluster 1","Clustered","7.03030303030303","Clustered","9.642857142857142","ENSMUSG00000022945"
"515","","",,,"Cluster 1","Serpina1e","false","false","Cluster 1","Clustered","6.533333333333333","Clustered","8.4","ENSMUSG00000072849"
"1538","","",,,"Cluster 1","Gsta1","false","false","Cluster 1","Clustered","7.0","Clustered","9.0","ENSMUSG00000074183"
"1535","","",,,"Cluster 1","S100a6","false","false","Cluster 1","Clustered","7.0","Clustered","9.0","ENSMUSG00000001025"
"1534","","",,,"Cluster 1","Hck","false","false","Cluster 1","Clustered","7.0","Clustered","9.0","ENSMUSG00000003283"
"1022","","",,,"Cluster 1","Samd4","false","false","Cluster 1","Clustered","6.805555555555555","Clustered","8.678571428571429","ENSMUSG00000021838"
"1533","","",,,"Cluster 1","Dll3","false","false","Cluster 1","Clustered","6.533333333333333","Clustered","8.4","ENSMUSG00000003436"
"1020","","",,,"Cluster 1","Amer2","false","false","Cluster 1","Clustered","6.805555555555555","Clustered","9.0","ENSMUSG00000021986"
"1532","","",,,"Cluster 1","Hspb1","false","false","Cluster 1","Clustered","6.9743589743589745","Clustered","9.09090909090909","ENSMUSG00000004951"
"2042","","",,,"Cluster 1","Creld2","false","false","Cluster 1","Clustered","7.0","Clustered","9.0","ENSMUSG00000023272"
"506","","",,,"Cluster 2","Mcidas","false","false","Cluster 1","Clustered","7.0","Clustered","7.555555555555555","ENSMUSG00000074651"
"1529","","",,,"Cluster 2","Fzd3","false","false","Cluster 1","Clustered","7.0","Clustered","8.0","ENSMUSG00000007989"
"1528","","",,,"Cluster 1","St3gal1","false","false","Cluster 1","Clustered","7.2727272727272725","Clustered","9.09090909090909","ENSMUSG00000013846"
"1016","","",,,"","Carmil3","false","false","Cluster 1","Clustered","7.0","Unclustered","6.066666666666666","ENSMUSG00000022211"
"2039","ARCHS4 Coexpression,1120;GTEx Coexpression,1240","TTC25,MDC1,AKNA,YBX2,PCSK4,LIMD2,GRK2,FAM102A,ADGRE5,SPOCK2,IFT57,TCP11,GSTM3,MYH7B,CARMIL2,IZUMO4,DENND4B,MFSD6L,NBEAL2,ABCA7,IQCD,SYNGR4,SORBS3,ZC2HC1C,FMNL1,RASA3,ASXL3,ALMS1,CFAP36,RIN3,YPEL3,CARD11","1387","1180.0","Cluster 1","Phf1","false","false","Cluster 1","Clustered","7.2727272727272725","Clustered","9.454545454545455","ENSMUSG00000024193"
"502","","",,,"Cluster 1","Fjx1","false","false","Cluster 1","Clustered","7.0","Clustered","9.0","ENSMUSG00000075012"
"2037","","",,,"Cluster 2","Adamts10","false","false","Cluster 1","Clustered","7.0","Clustered","7.111111111111111","ENSMUSG00000024299"
"2035","","",,,"Cluster 1","Sec11c","false","false","Cluster 1","Clustered","6.9485294117647065","Clustered","9.54945054945055","ENSMUSG00000024516"
"1521","","",,,"Cluster 1","Slc5a4b","false","false","Cluster 1","Clustered","6.805555555555555","Clustered","8.678571428571429","ENSMUSG00000020226"
"1008","","",,,"Cluster 2","Ypel1","false","false","Cluster 1","Clustered","7.0","Clustered","7.0","ENSMUSG00000022773"
"1517","","",,,"","Diaph3","false","false","Cluster 1","Clustered","6.533333333333333","Unclustered","6.545454545454546","ENSMUSG00000022021"
"2028","","",,,"Cluster 1","Ppp2r5b","false","false","Cluster 1","Clustered","6.681318681318682","Clustered","8.717948717948719","ENSMUSG00000024777"
"1003","","",,,"Cluster 1","Rttn","false","false","Cluster 1","Clustered","7.0","Clustered","9.0","ENSMUSG00000023066"
"1515","","",,,"Cluster 1","Adcy5","false","false","Cluster 1","Clustered","7.0","Clustered","9.0","ENSMUSG00000022840"
"1514","","",,,"Cluster 1","Rfc4","false","false","Cluster 1","Clustered","6.533333333333333","Clustered","10.0","ENSMUSG00000022881"
"489","","",,,"Cluster 2","Gm12216","false","false","Cluster 1","Clustered","7.0","Clustered","7.0","ENSMUSG00000081769"
"1001","","",,,"Cluster 1","Guca2a","false","false","Cluster 1","Clustered","7.0","Clustered","9.0","ENSMUSG00000023247"
"2025","","",,,"Cluster 1","Slc29a2","false","false","Cluster 1","Clustered","7.2727272727272725","Clustered","9.09090909090909","ENSMUSG00000024891"
"2023","","",,,"Cluster 1","Cep55","false","false","Cluster 1","Clustered","7.0","Clustered","10.0","ENSMUSG00000024989"
"999","","",,,"Cluster 2","Smoc2","false","false","Cluster 1","Clustered","6.805555555555555","Clustered","7.777777777777778","ENSMUSG00000023886"
"2022","","",,,"Cluster 1","Hells","false","false","Cluster 1","Clustered","7.0","Clustered","9.0","ENSMUSG00000025001"
"1510","","",,,"Cluster 2","Impact","false","false","Cluster 1","Clustered","7.0","Clustered","7.333333333333333","ENSMUSG00000024423"
"2019","","",,,"Cluster 1","Cd63","false","false","Cluster 1","Clustered","7.0","Clustered","9.0","ENSMUSG00000025351"
"481","","",,,"Cluster 1","Noc2l","false","false","Cluster 1","Clustered","7.0","Clustered","9.0","ENSMUSG00000095567"
"1504","","",,,"Cluster 1","Prps2","false","false","Cluster 1","Clustered","7.0","Clustered","9.0","ENSMUSG00000025742"
"1502","","",,,"Cluster 1","Mcm6","false","false","Cluster 1","Clustered","7.0","Clustered","9.0","ENSMUSG00000026355"
"1501","ARCHS4 Coexpression,405;Enrichr Queries,299;GTEx Coexpression,568","FCGBP,EHF,CWH43,MKI67,ETS1,SLC4A4,CLDN1,LGALS3,RGS2,CAPN8,CCND1,DPYSL2,MYC,CREB3L1,CHEK2,LIPG,DPYSL3,CAPN2,TNS4,GLUL,SLC12A8,TGM2,IER3,PDIA3,EPHA4,PRKCI,IGFBP3,DIO1,IGFBP2,KNSTRN,SDCBP2,OVOL2,ERN2,CLDN4,CLDN8,SCNN1A,LGALS12,PADI2,NUPR1,ZG16,PADI1,COL17A1,SDC4,ILDR1,LPL,SLC1A3,AK4,TNFRSF11A,FUT2,CRACR2A,PODXL,S100A14,KCNN4,TSPAN1,ZBTB7C,MYH7B,PRNP,TGFB2,ARHGEF37,NEBL,INHBB,FBXO32,FER1L6,GADD45G,CXCL10,GJB2,GCLC,FXYD3,GJB3,MYO5C,SDC1,RGL3,FGFR3,ITM2C,NRP1,PTPRU,BTG2,HSPB1,KRT20,HPF1,MMP28,TMED3,TIMP3,A4GALT,CGNL1,FGFBP1,MMP7,GPX3,MYOF,IL17RE,RNF144B,ADGRF1,KIT,ALDH1A1,KCNMA1,TFF3,CDH16,GPRC5C,MGLL,LAMA4,FAM129A,ATP2C2,SNX33,THBS1,SLC7A2,AURKB,PTHLH,CAMK2N1,SLITRK6,KLRG2,LRIG1,MPZL2,SLC12A2,LRRC26,GSN,AHNAK2,CYP4B1,SORBS2,KLF4,SORL1,MLPH,KRT15,FOSB,CCL28","374","424.0","Cluster 1","Tfcp2l1","false","false","Cluster 1","Clustered","6.805555555555555","Clustered","9.0","ENSMUSG00000026380"
"1498","","",,,"Cluster 1","Mcm10","false","false","Cluster 1","Clustered","7.151515151515151","Clustered","8.93939393939394","ENSMUSG00000026669"
"2009","","",,,"Cluster 1","Sdccag8","false","false","Cluster 1","Clustered","7.151515151515151","Clustered","10.0","ENSMUSG00000026504"
"2007","","",,,"Cluster 1","Cfap45","false","false","Cluster 1","Clustered","7.0","Clustered","9.0","ENSMUSG00000026546"
"982","","",,,"Cluster 2","Dynap","false","false","Cluster 1","Clustered","7.0","Clustered","8.0","ENSMUSG00000024512"
"2005","","",,,"Cluster 1","Nuf2","false","false","Cluster 1","Clustered","6.473684210526316","Clustered","8.573529411764707","ENSMUSG00000026683"
"1493","","",,,"Cluster 1","Bfsp1","false","false","Cluster 1","Clustered","7.2727272727272725","Clustered","10.0","ENSMUSG00000027420"
"1492","","",,,"Cluster 1","Cd93","false","false","Cluster 1","Clustered","7.0","Clustered","9.0","ENSMUSG00000027435"
"1489","","",,,"Cluster 2","Slc2a10","false","false","Cluster 1","Clustered","6.805555555555555","Clustered","8.2","ENSMUSG00000027661"
"977","ARCHS4 Coexpression,300;ENCODE ChIP-seq,26;Enrichr Queries,103;ReMap ChIP-seq,149;GTEx Coexpression,985","EHF,SLC35B1,MKI67,NOC2L,ENO3,IFIT3,ELK3,CDC20,LGALS3,MYC,LIPH,CREB3L1,MYB,CREB3L2,LONP1,PIEZO1,PIP4K2A,TNS4,IER3,IL1R1,P3H3,HSPG2,CLDN6,TIAM1,CLDN4,CLDN9,MXRA7,MYL9,PADI1,STX1A,SDC4,NCAPG,STC1,IQGAP3,PRKAR2B,STC2,PDGFC,KCNN4,EGR2,NEBL,LRRN2,PMM2,PLK1,NFATC2,CDC6,FOSL1,TPX2,ANLN,UCK2,GJB3,SPATS2L,ATR,CDKN1C,TOP2A,NRP1,BTG2,KCNC1,TGFB1I1,ATF7IP2,KIF11,PBK,TIMP3,SH3BGRL3,QSOX1,TK1,CEP55,MYOF,KIF23,PAX6,RHOC,TUBB2A,INCENP,KIFC1,CKS2,ADSSL1,KIF2C,TLR6,KIFC3,GAS6,FJX1,GART,GPRC5C,DBN1,DTYMK,SLC43A3,NT5E,PLEKHA2,LAPTM5,GPR4,CENPE,TMEM158,KRT15,FOSB,TRIP13,CDKN3,STEAP3,IRS1,ETS1,CAPN8,RGS2,CCND1,SLCO2B1,CAPN2,TNFRSF8,ENPP3,TGM2,PHLDA3,KCNH2,RNF43,CHRNB4,IGFBP4,ZBTB38,IGFBP3,ARID5A,SHISA4,ACAP3,PROCR,SLC9A5,MELK,DKC1,ADAM12,S100A6,SCG3,NUPR1,SQSTM1,GMPR,LIN7A,FBLN2,ZFP36L2,SLC9A3R2,CCNB2,TMEM245,CCNB1,KIF3C,ECT2,SRGAP1,PRNP,ARHGEF37,UBE2C,RASL10B,CAV2,HMGA1,CRIM1,HMGA2,ARHGAP29,ISG15,FBXO32,SYT7,ARHGAP23,ISG20,CXCL10,DAP,BFSP1,PROC,NR4A3,DLG4,FES,SP6,CDK1,AMOTL2,ULBP1,MAP3K14,LRP11,CNTNAP2,TNFAIP2,HSPB1,FOXM1,RND3,LMNB1,SPRED3,ADGRE5,MYBL2,CFAP45,HIST1H1C,SMIM14,DST,PLAUR,IQCD,ETV4,CKAP4,CCNA2,RCN1,VGF,ASPH,IRF1,BIRC5,MCM4,ITGA5,NEMP1,ST6GALNAC4,DTL,HEMGN,UHRF1,RGS16,CXXC5,THBS1,AURKB,AGPAT4,AURKA,ABLIM1,LRIG1,HES1,LRRC8E,E2F7,ANGPT2,RRM2,AHNAK2,ARID3A,KLF4,MEIS3,FAM167A,FMNL1,MLPH,PIK3IP1,PRC1,CROCC,TRIM35,VIM,SSBP2","224","312.6","Cluster 4","Fosl1","false","false","Cluster 1","Clustered","6.583743842364532","Seed","6.583743842364532","ENSMUSG00000024912"
"1487","","",,,"Cluster 1","Hspg2","false","false","Cluster 1","Clustered","7.2727272727272725","Clustered","9.09090909090909","ENSMUSG00000028763"
"1998","","",,,"Cluster 1","Dnajc10","false","false","Cluster 1","Clustered","6.533333333333333","Clustered","10.0","ENSMUSG00000027006"
"1486","","",,,"Cluster 1","Rhd","false","false","Cluster 1","Clustered","6.533333333333333","Clustered","8.4","ENSMUSG00000028825"
"1484","","",,,"Cluster 1","Smarcd3","false","false","Cluster 1","Clustered","7.0","Clustered","10.0","ENSMUSG00000028949"
"972","","",,,"Cluster 1","Habp2","false","false","Cluster 1","Clustered","7.0","Clustered","9.0","ENSMUSG00000025075"
"1996","","",,,"Cluster 1","Slc43a1","false","false","Cluster 1","Clustered","7.151515151515151","Clustered","8.93939393939394","ENSMUSG00000027075"
"1995","ARCHS4 Coexpression,203;Enrichr Queries,432;ReMap ChIP-seq,219;GTEx Coexpression,198","IFITM3,MDC1,CCNF,STMN3,TMEM92,LGALS3,MCIDAS,VSIG1,CREB3L4,LIPH,DPYSL2,MYC,RASSF6,CREB3L2,DPYSL3,LONP1,PIEZO1,IER3,DNAAF3,IL1R1,P3H1,BHLHA15,P3H3,CPT1C,HSPG2,DKK3,PLPP5,RFX6,HOXB4,HOXB3,KDELR3,MXRA7,HOXB8,MYL9,CFTR,STX1A,SDC4,AGAP2,IQGAP3,SLC5A3,CRACR2A,NUAK1,CRACR2B,STC2,PDGFC,CEP192,PMM2,SLC33A1,EIF2AK3,NBEAL2,ABCA7,NR0B2,GADD45G,FOSL1,SDC1,CALR,FERMT2,ITM2C,FKBP11,NRP1,COL18A1,BTG2,ECM1,TMEM151B,PHF1,TGFB1I1,MIA3,KIF11,HERPUD1,SERP1,FAM102A,MECOM,SH3PXD2A,TMED3,TIMP2,TIMP3,QSOX1,PLEKHN1,QSOX2,TMED6,PSD,RMI2,SLC2A10,IZUMO1,ROM1,MYOF,COPZ2,RHOC,CBFA2T3,RENBP,BACE2,B3GNT9,TUBB2A,ANGPTL6,KIT,TFF2,GAS6,GPRC5C,VAMP2,MGLL,COL11A2,SNX33,PSMC3IP,NT5E,OS9,CARNS1,AGR2,LY6G6F,CDKN2C,GSN,TMCO3,FMO5,SORBS3,RFLNA,GRIN1,SGSM3,A4GNT,KRT15,FOSB,FOXA3,FOXA1,OLFML2B,CHPF,IRS1,ALDH1L2,ETS1,CAPN8,RGS2,CAPN9,CCND1,BASP1,CAPN2,PIM2,TGM2,PHLDA3,KCNH2,POSTN,IGFBP4,IGFBP3,ANXA10,PDIA6,PDIA5,DISP2,ADAM19,ERN2,SLC9A5,SELENOS,ZFP41,ADAM12,S100A6,NUPR1,RTN2,BRSK1,NOTCH3,CEMIP,FAM114A1,UBA5,TNFRSF11B,FUT1,FBLN2,FUT4,ZFP36L2,SLC9A3R2,SYCE2,IGFBP7,PRNP,TGFB2,SDF2L1,CBX5,DENND4B,HMGA1,CRIM1,ISG15,SSC5D,ARHGAP23,CXCL10,DAP,EFNA3,DLG4,FES,SP6,AMOTL2,PSCA,TNFAIP2,HSPB1,NRARP,PIDD1,BDKRB2,EMILIN1,SCARF2,HIST1H1C,EGFL7,GPX3,PLAUR,SYNGR4,CKAP4,RCN1,IRF1,ITGA5,RGS14,LAMA4,PALM3,NTN4,RSPH9,CXXC5,THBS1,AURKB,DLL3,LRIG1,GALNT5,ARID3A,FBXL16,KLF4,MLPH,BCL6B,IMPDH2,FAM131A,VIM","168","263.0","Cluster 1","Creb3l1","false","false","Cluster 1","Clustered","7.0","Clustered","9.0","ENSMUSG00000027230"
"1479","","",,,"Cluster 1","Nucb2","false","false","Cluster 1","Clustered","6.871794871794871","Clustered","8.58974358974359","ENSMUSG00000030659"
"1987","","",,,"Cluster 1","Fabp5","false","false","Cluster 1","Clustered","6.9743589743589745","Clustered","10.0","ENSMUSG00000027533"
"1986","","",,,"Cluster 1","Procr","false","false","Cluster 1","Clustered","6.533333333333333","Clustered","8.4","ENSMUSG00000027611"
"1474","","",,,"Cluster 1","Dhodh","false","false","Cluster 1","Clustered","6.533333333333333","Clustered","9.0","ENSMUSG00000031730"
"1982","","",,,"Cluster 1","Serpini1","false","false","Cluster 1","Clustered","7.0","Clustered","9.0","ENSMUSG00000027834"
"957","","",,,"Cluster 1","Podxl","false","false","Cluster 1","Clustered","7.0","Clustered","9.0","ENSMUSG00000025608"
"1978","","",,,"Cluster 1","Casp8ap2","false","false","Cluster 1","Clustered","7.03030303030303","Clustered","9.09090909090909","ENSMUSG00000028282"
"1977","","",,,"Cluster 1","Smc2","false","false","Cluster 1","Clustered","6.611111111111111","Clustered","10.0","ENSMUSG00000028312"
"1465","","",,,"Cluster 2","Rfc3","false","false","Cluster 1","Clustered","6.805555555555555","Clustered","6.836363636363636","ENSMUSG00000033970"
"1463","","",,,"Cluster 1","Asb16","false","false","Cluster 1","Clustered","7.151515151515151","Clustered","9.272727272727273","ENSMUSG00000034768"
"1972","","",,,"Cluster 2","Tnfrsf8","false","false","Cluster 1","Clustered","6.805555555555555","Clustered","7.111111111111111","ENSMUSG00000028602"
"947","","",,,"Cluster 1","Mlph","false","false","Cluster 1","Clustered","7.2727272727272725","Clustered","9.454545454545455","ENSMUSG00000026303"
"1458","","",,,"Cluster 1","Krt222","false","false","Cluster 1","Clustered","7.0","Clustered","9.0","ENSMUSG00000035849"
"1969","ARCHS4 Coexpression,320;Enrichr Queries,175;GTEx Coexpression,554","CD83,NRROS,ANKRD35,LDLRAD3,RORA,CWH43,CLDN1,ETS1,SLC8A1,IGF1R,PREX1,RGS2,CCND1,BASP1,DPYSL2,MYC,SLCO2B1,RASSF5,LIPK,TNS4,TGM2,IER3,EPHA4,MREG,ANKRD44,ARID5A,ARID5B,FRMD4A,VASH1,ADAM19,TIAM1,KCNQ1,ADAM12,SLC9A9,RIN3,KCTD12,COL17A1,CSF1R,SEMA7A,GLIS3,PLA2G3,CACNA1A,ITPR2,CACNA1C,PIK3R5,GOLGA7B,ALDH3B2,TRPM2,KLC3,RDH12,KCNN4,ST3GAL1,WNT3,PRNP,EGR2,CARMIL2,CARMIL3,SIVA1,CADM1,DENND4B,CRIM1,NFATC2,POU2F3,SDK1,PTPRE,CXCL10,EFNA3,CDK6,NR4A3,GJB3,LYPD6B,SP6,SDC1,RGL1,ITM2C,NRP1,BTG2,TNFAIP8,CCDC120,TENM4,CELF2,DOCK8,TNFAIP2,SYNE1,SPN,SDR16C5,DUSP10,GM2A,SH3PXD2A,TIMP2,FFAR4,TNFAIP8L3,PLEKHN1,CD53,TRIM62,CAMK1D,DST,TNFRSF19,MYOF,PLAUR,NAV1,ETV6,APBB1IP,GFOD1,SETBP1,RASA3,B3GNT5,KCNMA1,PLEKHO1,RHOV,DOCK2,PLCB2,MGLL,C1QA,SLC43A2,SLC43A3,RGS16,FAM129A,NPL,THBS1,AURKB,ABLIM1,CHSY1,RNF39,MAN1C1,LRIG1,SPTSSB,GSN,LAPTM5,SORBS2,KRT10,LHFPL2,KLF4,SORL1,FMNL3,FMNL2,P2RX4,NFIB,TRIM35,VIM,CENPP","265","349.7","Cluster 1","Hivep3","false","false","Cluster 1","Clustered","7.151515151515151","Clustered","8.93939393939394","ENSMUSG00000028634"
"1455","","",,,"Cluster 1","Ska1","false","false","Cluster 1","Clustered","6.805555555555555","Clustered","10.0","ENSMUSG00000036223"
"1966","","",,,"Cluster 1","Tspan1","false","false","Cluster 1","Clustered","6.533333333333333","Clustered","8.4","ENSMUSG00000028699"
"940","","",,,"Cluster 1","Fam129a","false","false","Cluster 1","Clustered","6.805555555555555","Clustered","9.0","ENSMUSG00000026483"
"1450","","",,,"Cluster 1","Igfbp2","false","false","Cluster 1","Clustered","7.0","Clustered","9.0","ENSMUSG00000039323"
"1961","","",,,"Cluster 1","Ptpru","false","false","Cluster 1","Clustered","6.805555555555555","Clustered","9.0","ENSMUSG00000028909"
"1449","","",,,"Cluster 1","Mreg","false","false","Cluster 1","Clustered","6.9743589743589745","Clustered","8.717948717948719","ENSMUSG00000039395"
"1957","","",,,"Cluster 2","Klhl8","false","false","Cluster 1","Clustered","7.0","Clustered","8.0","ENSMUSG00000029312"
"1956","","",,,"Cluster 1","Crybb1","false","false","Cluster 1","Clustered","6.805555555555555","Clustered","10.0","ENSMUSG00000029343"
"1955","","",,,"Cluster 1","Abcb9","false","false","Cluster 1","Clustered","7.0","Clustered","9.0","ENSMUSG00000029408"
"1438","","",,,"Cluster 2","Tubg2","false","false","Cluster 1","Clustered","6.533333333333333","Clustered","7.8545454545454545","ENSMUSG00000045007"
"1436","","",,,"Cluster 1","Mms22l","false","false","Cluster 1","Clustered","6.611111111111111","Clustered","10.0","ENSMUSG00000045751"
"924","","",,,"Cluster 1","Dsn1","false","false","Cluster 1","Clustered","6.805555555555555","Clustered","9.0","ENSMUSG00000027635"
"1946","","",,,"Cluster 1","Ccdc184","false","false","Cluster 1","Clustered","7.0","Clustered","9.0","ENSMUSG00000029875"
"1434","","",,,"Cluster 1","A4galt","false","false","Cluster 1","Clustered","7.0","Clustered","9.0","ENSMUSG00000047878"
"1945","","",,,"Cluster 1","Mad2l1","false","false","Cluster 1","Clustered","6.533333333333333","Clustered","8.678571428571429","ENSMUSG00000029910"
"920","","",,,"Cluster 2","Dclk1","false","false","Cluster 1","Clustered","7.0","Clustered","8.0","ENSMUSG00000027797"
"1943","","",,,"Cluster 1","Usp18","false","false","Cluster 1","Clustered","7.0","Clustered","9.0","ENSMUSG00000030107"
"1942","ARCHS4 Coexpression,348;Enrichr Queries,775;ReMap ChIP-seq,78;GTEx Coexpression,1156","IFITM3,MDC1,ENO3,SOGA1,ELK3,MILR1,ZC3H12C,SYNPR,PREX1,RINL,CREB3L4,DPYSL2,MYC,CREB3L2,MYB,LONP1,TNFSF10,DPF3,PDK1,IER3,TMEM88B,MBNL1,DNAAF3,SP110,RNASE4,CPT1C,TFR2,RIN3,SDC4,PIK3R5,PGBD5,INPP5D,HIVEP3,ST8SIA6,KCNN4,PCK1,ST3GAL1,NBEAL2,FAM111A,C2CD2L,ITM2C,NRP1,BTG2,CD40,TMEM151B,RCSD1,HERPUD1,SH3PXD2A,FFAR3,FFAR2,FFAR1,EMB,PSD,CD53,DENND2C,IZUMO4,TMEM150A,ACTL6B,KCND3,MYOF,CBFA2T3,VAV1,DDB2,APBB1IP,RNF144B,HCK,ANGPTL6,MAPRE3,PLEKHO1,PLCB2,DBN1,SLC43A3,HDC,FAM129A,SNX33,FAM117A,FGD2,TCEAL5,GCH1,GPR55,LAPTM5,GFI1B,KBTBD6,MORN4,KLHL5,NFIB,FOSB,YPEL3,NRROS,CD83,NCF2,RORA,NR3C1,ETS1,IGF1R,IL18RAP,CCND1,BASP1,TNFRSF8,TGM2,ZBP1,MYLIP,MREG,ARID5A,ARID5B,FRMD4A,TANC2,MPEG1,ADAM19,SLC9A5,ZFP41,RAB37,SCNN1A,RELL2,RTN2,NOTCH2,NOTCH1,AKNA,ILDR1,ITPR2,ZFP36L2,FUT4,ITPRIPL1,BCL2L11,GRK2,CYP11A1,FN3K,PRNP,SDF2L1,OSBPL5,DENND4B,HMGA1,CRIM1,PTPRE,CXCL10,CDK6,REEP5,FES,XAF1,MAP3K14,KCNK6,TNFAIP8,CELF2,DOCK8,TNFAIP2,ATP2A3,ITGAL,PIK3CG,LMNB1,SPN,DUSP10,ADGRE5,SCRN1,ITGB7,BCAS1,HIST1H1C,SMIM14,PIANP,CAMK1D,DST,ITGA4,PLAUR,ETV6,DUSP22,RASA3,IRF1,ANG,MCTP2,DOCK2,CAMK2B,RGS14,RGS16,RSPH9,CXXC5,PPM1E,THBS1,AURKB,DLL4,ABLIM1,CHSY1,LRIG1,HES1,RNF24,CADPS,ARID3A,KLF4,SORL1,FMNL3,FAM167A,FMNL1,ALOX5AP,TRIM35,ACKR3,TRIM37,TRIM38,VIM","639","589.3","Cluster 2","Etv6","false","false","Cluster 1","Clustered","7.016129032258065","Clustered","7.016129032258065","ENSMUSG00000030199"
"915","","",,,"Cluster 1","Efna3","false","false","Cluster 1","Clustered","6.533333333333333","Clustered","8.4","ENSMUSG00000028039"
"1421","","",,,"Cluster 1","Atp8b2","false","false","Cluster 1","Clustered","7.0","Clustered","10.0","ENSMUSG00000060671"
"1419","","",,,"Cluster 1","Hvcn1","false","false","Cluster 1","Clustered","7.0","Clustered","9.0","ENSMUSG00000064267"
"907","","",,,"Cluster 1","Ambp","false","false","Cluster 1","Clustered","7.0","Clustered","9.0","ENSMUSG00000028356"
"1929","","",,,"Cluster 1","Cenpu","false","false","Cluster 1","Clustered","7.315789473684211","Clustered","8.982456140350877","ENSMUSG00000031629"
"1416","","",,,"Cluster 1","Trp53i11","false","false","Cluster 1","Clustered","6.533333333333333","Clustered","8.4","ENSMUSG00000068735"
"1928","","",,,"Cluster 1","Eif2ak3","false","false","Cluster 1","Clustered","7.2727272727272725","Clustered","8.58974358974359","ENSMUSG00000031668"
"904","","",,,"Cluster 2","Spink4","false","false","Cluster 1","Clustered","6.805555555555555","Clustered","7.288888888888889","ENSMUSG00000028415"
"900","","",,,"Cluster 1","Cachd1","false","false","Cluster 1","Clustered","6.533333333333333","Clustered","8.4","ENSMUSG00000028532"
"898","","",,,"Cluster 1","Ttc39a","false","false","Cluster 1","Clustered","6.805555555555555","Clustered","9.0","ENSMUSG00000028555"
"1408","","",,,"Cluster 1","AW011738","false","false","Cluster 1","Clustered","6.805555555555555","Clustered","10.0","ENSMUSG00000078349"
"1407","","",,,"Cluster 1","R3hdml","false","false","Cluster 1","Clustered","6.805555555555555","Clustered","9.0","ENSMUSG00000078949"
"1918","","",,,"Cluster 1","Gclc","false","false","Cluster 1","Clustered","6.764705882352941","Clustered","9.323809523809524","ENSMUSG00000032350"
"1406","","",,,"Cluster 2","D130040H23Rik","false","false","Cluster 1","Clustered","7.0","Clustered","8.0","ENSMUSG00000079038"
"1404","","",,,"Cluster 1","Ulbp1","false","false","Cluster 1","Clustered","6.805555555555555","Clustered","9.0","ENSMUSG00000079685"
"1915","","",,,"Cluster 1","Amotl2","false","false","Cluster 1","Clustered","6.533333333333333","Clustered","8.4","ENSMUSG00000032531"
"1403","","",,,"Cluster 1","Rdh1","false","false","Cluster 1","Clustered","7.151515151515151","Clustered","9.272727272727273","ENSMUSG00000089789"
"1401","","",,,"Cluster 1","2610524H06Rik","false","false","Cluster 1","Clustered","6.611111111111111","Clustered","9.0","ENSMUSG00000092486"
"1399","","",,,"Cluster 1","Kctd12","false","false","Cluster 1","Clustered","6.871794871794871","Clustered","10.0","ENSMUSG00000098557"
"1908","","",,,"Cluster 1","Slc16a1","false","false","Cluster 1","Clustered","6.805555555555555","Clustered","9.0","ENSMUSG00000032902"
"1395","","",,,"Cluster 1","Grik3","false","false","Cluster 1","Clustered","6.805555555555555","Clustered","9.0","ENSMUSG00000001985"
"1393","","",,,"Cluster 2","Kif19a","false","false","Cluster 1","Clustered","6.533333333333333","Clustered","7.466666666666667","ENSMUSG00000010021"
"1390","","",,,"Cluster 1","Sptb","false","false","Cluster 1","Clustered","7.0","Clustered","10.0","ENSMUSG00000021061"
"1387","","",,,"Cluster 1","Pde1b","false","false","Cluster 1","Clustered","6.533333333333333","Clustered","8.4","ENSMUSG00000022489"
"1385","","",,,"Cluster 1","Gfra3","false","false","Cluster 1","Clustered","6.611111111111111","Clustered","9.0","ENSMUSG00000024366"
"1384","","",,,"Cluster 2","Spire1","false","false","Cluster 1","Clustered","6.533333333333333","Clustered","7.466666666666667","ENSMUSG00000024533"
"1895","","",,,"Cluster 1","Zdhhc14","false","false","Cluster 1","Clustered","6.871794871794871","Clustered","8.461538461538462","ENSMUSG00000034265"
"868","","",,,"Cluster 1","Tuba8","false","false","Cluster 1","Clustered","7.0","Clustered","9.0","ENSMUSG00000030137"
"1379","","",,,"Cluster 1","Klhl7","false","false","Cluster 1","Clustered","7.0","Clustered","9.0","ENSMUSG00000028986"
"867","","",,,"Cluster 1","Itpr2","false","false","Cluster 1","Clustered","6.805555555555555","Clustered","9.0","ENSMUSG00000030287"
"865","Literature ChIP-seq,41;ARCHS4 Coexpression,398;ENCODE ChIP-seq,27;Enrichr Queries,56;ReMap ChIP-seq,103;GTEx Coexpression,1057","MDC1,ANKLE1,FRMPD1,NOC2L,ENO3,CREB3L4,MYC,CREB3L1,DPYSL2,STMN1,CREB3L2,MYB,IER3,CHGB,CUBN,PRKCI,CACNA2D1,RNASE4,HSPG2,WDR76,DKK3,CLDN6,EML5,EML6,CLDN9,HOXB4,HOXB3,HOXB2,HOXB8,PRR11,PADI1,ASF1B,CDCA3,SHMT1,CDCA7,ABCB9,PLA2G7,LYPD6,CRACR2B,PRKAR2B,PDGFC,S100A13,CEP72,S100A14,PPARGC1B,PLK4,BARD1,FZD3,DNAH11,AFAP1L1,CADM1,PLK1,EDEM2,ABCA7,CDC6,FOSL1,UCK2,H2AFY2,GJB3,FAT4,XKR4,CDK14,FERMT2,WDR47,RCSD1,JPH1,CHAF1B,FAM102A,CHAF1A,PBK,TIMP3,TK1,EMB,CEP55,TEAD4,CLUH,ARG1,MYOF,COPZ2,DDB2,MRAS,PLCB4,INCENP,KIFC1,MMP17,KCNMA1,ADSSL1,CKS2,SMTNL2,PLCB1,VAMP2,MGLL,SLC29A2,RAPGEF4,PHLPP1,PLPPR2,PKN3,FAM129A,SEZ6,AFP,TMEM163,UNG,TMEM71,TCOF1,EGLN1,ATAD5,ATAD2,SYVN1,BMP8A,TMEM62,GUCA2A,SMOC2,CENPF,MORN4,NFIB,FOSB,COQ8A,YPEL3,FRYL,NUCB2,CDKN3,RAB3B,SEMA5A,ZC3HAV1L,RORA,FRY,CDH2,SLCO2B1,CEP250,KCNH2,TLE2,IGFBP3,ZBTB38,ANKRD44,FRMD4A,OBSCN,MELK,HAT1,S100A6,NOTCH2,SEMA7A,DNMT1,GLIS3,ITPR2,PKMYT1,AK7,IGSF21,FGGY,PLXNA4,ANKRD26,RBPMS,TMEM132B,HTR1D,CCDC15,ESRRG,KY,REEP1,CXCL10,CDK6,GGCX,CDK1,PLEKHM3,TRIM72,CELF2,RASGRF1,MCM10,ZC3H6,FOXM1,PSTPIP1,EXO1,INSL5,BCAS1,PLEKHG1,HAUS4,SPTB,PARD3B,NEMP2,MCM3,PECAM1,MCM4,BIRC5,ANG,MCM5,TRIM59,ITGA5,MCM6,NEMP1,DTL,ITGA9,PLEKHH2,UHRF1,GLS2,CCDC69,CXXC5,PPM1E,THSD4,SH3BP1,P2RY2,E2F1,WASF1,E2F7,JAZF1,CYB5A,KCNJ11,RNF24,PCDH8,SYT14,FBXL16,KLF4,TPD52L1,SORL1,PRC1,IMPDH2,ASXL3,TRIM37,IFITM3,LRR1,CCNF,GDE1,DIXDC1,MKI67,CDC20,LGALS3,CHEK2,LONP1,PIEZO1,TNS4,CCDC92,SLC12A8,FBXO9,EPHA4,P3H1,KNL1,P3H3,TIAM1,MXRA7,ZG16,SDC4,GIPR,MAGED1,TSHZ2,STC1,NUAK1,STRIP2,RACGAP1,STC2,SARAF,EGR2,DTNA,NBEAL2,DCLK1,GADD45G,TPX2,ANLN,PM20D2,PDE3A,CALR,SPRR1A,C2CD2L,ITM2C,TOP2A,NRP2,DIRAS2,KIF14,PTPRM,KIF11,PCSK4,SH3PXD2A,STBD1,CTSK,LMCD1,PSD,APOBEC2,TMEM150A,IZUMO1,KIF24,KIF23,NME4,KIF22,TUBG2,IL17RD,VAV1,RNF144B,NR5A2,KIF2C,FJX1,PDZRN3,DBN1,SDCCAG8,OPRD1,INPP1,SERTAD4,EXOSC8,CAP2,GINS1,PLEKHA2,FAM189A1,PNMA2,GRIN1,ETNPPL,TTC8,CYP2W1,KLHL5,GSTA4,GPAM,KRT15,QPCT,CACHD1,APBA1,TRIP13,SPC24,MAD2L1,ETS1,CELSR3,COMP,SYDE2,ARHGAP44,SCGN,CCND1,KIF5C,CAPN2,KNTC1,TMEM38A,PDE8A,TGM2,CASR,GAS2L3,ARID5B,KCTD1,PLA2G15,DCTD,SCNN1A,ADAM12,ANKS6,LMX1B,CARD11,RTN2,HTRA3,SLC41A2,CACNA1A,SLC1A3,CACNA1C,FUT1,ZFP36L2,CNN3,CCNB1,PODXL,NXPH1,ECT2,FAM83D,MARK1,KLHL29,PRNP,STIL,CBX5,POU2F1,UBE2C,HMGA1,CRIM1,HMGA2,ISG15,ARHGAP24,IFT20,BMP4,SDK1,GCLC,NR4A3,CPS1,DLG4,FAM151A,AMOTL2,LRP11,TNFAIP8,TNFAIP2,HMGB2,HSPB1,RND3,LMNB1,PIDD1,MYBL2,TOPBP1,A4GALT,CFAP45,HIST1H1C,TGIF2,CAMK1D,PLAUR,MYRIP,ETV4,ETV6,CCNA2,VGF,TBC1D4,RASA4,IRF1,ADGRF5,RBM20,RGS16,LAMA4,PALM3,ADD3,THBS1,CLCN1,AURKB,ASB16,AURKA,DLL4,PDE11A,POLD1,NT5DC2,POLD2,LRIG1,KLRG2,MAN1C1,SPOCK1,HES1,PDE6A,BUB1,RRM2,CADPS,ARID3A,TICRR,FMNL2,VIM,SSBP2,SNTB1,HCN1","188","280.3","Cluster 2","Tead4","false","false","Cluster 1","Clustered","6.658536585365853","Clustered","6.658536585365853","ENSMUSG00000030353"
"1888","","",,,"Cluster 1","Hpse","false","false","Cluster 1","Clustered","7.0","Clustered","10.0","ENSMUSG00000035273"
"1374","","",,,"Cluster 1","Chrm1","false","false","Cluster 1","Clustered","7.0","Clustered","9.0","ENSMUSG00000032773"
"861","","",,,"Cluster 1","Dkk3","false","false","Cluster 1","Clustered","6.805555555555555","Clustered","9.0","ENSMUSG00000030772"
"1369","ARCHS4 Coexpression,667;Enrichr Queries,341;GTEx Coexpression,1286","FOXA1,ANKLE1,GFI1,OTP,RORA,ETS1,KIF5C,CREB3L1,PLXNC1,TCP11,EPHA4,TTC7B,CPT1C,ISL1,FAM227A,DISP2,LMX1A,MAP1B,HOXB3,LMX1B,GLIS3,CACNA1A,PKMYT1,CPLX2,FUT2,TRPM2,NEUROD2,FAM221A,GALR1,MAP6,NPTX1,RHBDL3,NPTX2,ZBTB7C,GSTM3,NGFR,EGR2,SLC14A2,CADM1,MFSD6L,NFATC2,HMGA2,INHBB,ESRRG,SYT7,BMP4,EFNA3,LHX1,ID4,XKR4,TTC25,CDKN1C,RET,COL18A1,TRIM72,TENM4,GRIK3,CELF5,YBX2,NRARP,PCSK4,SPRED3,TUBA1A,MECOM,ANXA6,GAST,NEFM,RPS6KL1,IZUMO4,KIF24,PAX6,IQCD,PROX1,SYNGR4,CBFA2T3,ZDHHC15,MN1,NR5A2,VGF,KCNMA1,ASPA,CAMK2B,OPRD1,SEZ6,AURKB,DLL4,PDE11A,CAMK2N1,MSX1,KCNJ5,PCDH8,IRX4,LHFPL5,ARID3A,KLF4,POU4F1,DLK1,MAB21L3,MGAT4C,NFIB,NOVA2,INSM1,BRDT","889","764.7","Cluster 2","Onecut3","false","false","Cluster 1","Clustered","6.611111111111111","Clustered","7.555555555555555","ENSMUSG00000045518"
"1880","","",,,"Cluster 1","Igfbp7","false","false","Cluster 1","Clustered","7.0","Clustered","9.0","ENSMUSG00000036256"
"1368","ARCHS4 Coexpression,78;Enrichr Queries,106;GTEx Coexpression,309","FOXA1,CNTFR,GFI1,BUB1B,STMN3,RORA,TTF2,MKI67,CELSR3,AMOT,CCND1,CDH2,KIF5C,BASP1,DPYSL2,MYC,CHEK2,DPYSL3,MYB,PALM,STMN1,TNFRSF8,RTTN,TMEM38A,PLXNC1,THSD7A,EPHA4,TIPIN,KCNH6,TMEM178B,IGFBP3,CACNA2D1,VASH2,ARID5B,VRK1,ESCO2,ISL1,MYT1,TRAIP,OLFM1,GPRIN1,MAP1B,LGALS12,LMX1B,ASF1B,SEMA7A,BRSK2,HVCN1,CACNA1B,CACNA1A,SLCO5A1,NREP,NCAPH,RAD51AP1,NEUROD1,ORC1,MAP2,NHLH1,MAP6,NPTX1,KIF3C,RHBDL3,NPTX2,SCN3A,B4GALNT4,ASIC1,PLK4,FANCI,NGFR,CCDC18,STIL,EGR2,TGFB2,FZD3,CADM1,BDNF,XRCC2,HMGA2,ESRRG,DCLK1,GADD45G,BMP4,REEP1,CXCL10,SDK1,XKR7,CDK6,NR4A3,H2AFY2,UBE2T,LHX1,PKIA,ID4,FGFR3,CDKN1C,RET,TRIM72,SNAP25,CNTNAP2,PTPRU,TENM4,MCM8,ONECUT3,CELF5,SOBP,GRM2,CHAF1B,CHAF1A,TUBA1A,MECOM,GDAP1L1,MYBL2,NEFM,CEP170,KIF1A,TRIM67,APC2,HELLS,KLF12,ACTL6B,PAX6,FAM219A,PROX1,MN1,KIT,KCNMA1,MTFR2,DTL,DBN1,MCM2,CAMK2B,RGS16,GREB1L,CRMP1,HOXD13,ADCY1,TMEM163,COCH,AURKB,NCALD,ASB16,AGPAT4,GNG2,SERTAD4,GPR153,GNG4,CAMK2N1,NT5DC2,LRIG1,RAD54L,MSX1,SLIT2,BUB1,CCDC184,E2F7,E2F8,RUNX1T1,ATAD2,GPR55,PCDH8,RPA2,MND1,SYT13,KLF4,DLK1,RAD51,CENPH,ABI2,NFIB,ASXL3,NOVA2,YPEL1,FOSB,INSM1,LGR5","74","164.3","Cluster 1","Pou4f1","false","false","Cluster 1","Clustered","6.805555555555555","Clustered","9.0","ENSMUSG00000048349"
"1876","","",,,"Cluster 1","Syde2","false","false","Cluster 1","Clustered","7.0","Clustered","9.0","ENSMUSG00000036863"
"1873","","",,,"Cluster 2","Wee2","false","false","Cluster 1","Clustered","6.805555555555555","Clustered","7.777777777777778","ENSMUSG00000037159"
"1361","","",,,"Cluster 1","Col8a1","false","false","Cluster 1","Clustered","7.0","Clustered","9.0","ENSMUSG00000068196"
"1359","","",,,"Cluster 2","Trabd2b","false","false","Cluster 1","Clustered","7.0","Clustered","7.555555555555555","ENSMUSG00000070867"
"1358","","",,,"Cluster 1","Myh7b","false","false","Cluster 1","Clustered","7.0","Clustered","9.0","ENSMUSG00000074652"
"1356","","",,,"Cluster 1","Notch4","false","false","Cluster 1","Clustered","6.533333333333333","Clustered","8.678571428571429","ENSMUSG00000015468"
"842","","",,,"Cluster 1","Hsd17b2","false","false","Cluster 1","Clustered","6.533333333333333","Clustered","8.4","ENSMUSG00000031844"
"1865","","",,,"Cluster 1","Prkci","false","false","Cluster 1","Clustered","6.417582417582418","Clustered","9.09090909090909","ENSMUSG00000037643"
"1352","","",,,"Cluster 3","Itga5","false","false","Cluster 1","Clustered","7.2727272727272725","Clustered","10.694444444444445","ENSMUSG00000000555"
"1864","","",,,"Cluster 1","Tgm2","false","false","Cluster 1","Clustered","6.681318681318682","Clustered","9.833333333333334","ENSMUSG00000037820"
"1350","","",,,"Cluster 1","Smo","false","false","Cluster 1","Clustered","7.0","Clustered","10.0","ENSMUSG00000001761"
"1862","","",,,"Cluster 2","Hpf1","false","false","Cluster 1","Clustered","7.2727272727272725","Clustered","8.131868131868131","ENSMUSG00000038005"
"838","","",,,"Cluster 1","Capn9","false","false","Cluster 1","Clustered","7.151515151515151","Clustered","8.787878787878787","ENSMUSG00000031981"
"1860","","",,,"Cluster 1","Rnf144b","false","false","Cluster 1","Clustered","6.805555555555555","Clustered","9.0","ENSMUSG00000038068"
"1347","","",,,"Cluster 2","Phyhip","false","false","Cluster 1","Clustered","7.0","Clustered","8.0","ENSMUSG00000003469"
"1858","","",,,"Cluster 1","Cep250","false","false","Cluster 1","Clustered","6.871794871794871","Clustered","8.93939393939394","ENSMUSG00000038241"
"834","Literature ChIP-seq,163;ARCHS4 Coexpression,222;ENCODE ChIP-seq,31;Enrichr Queries,457;ReMap ChIP-seq,206;GTEx Coexpression,367","IFITM3,SLC46A3,EHF,ANKLE1,SLC35B1,AQP9,MRGPRE,NOC2L,ENO3,IFIT3,ELK3,MILR1,LGALS3,PREX1,SAMD14,RINL,GNAT2,CREB3L4,MYC,DPYSL2,RASSF5,CHEK2,LONP1,PIEZO1,RTTN,SKP2,HOXA4,IER3,PDK1,FBXO9,MBNL1,PRKCI,DNAAF3,RSAD2,IL1R1,RNASE4,ESCO2,CPT1C,HSPG2,CLDN6,CLDN9,TFR2,KCNQ1,HOXB4,HOXB3,RIN3,HOXB8,MYL9,STX1A,PIF1,CDCA3,SDC4,STXBP1,AGAP2,ADAMTS10,CRACR2B,RACGAP1,INPP5D,STC2,FAM43A,KCNN4,ST3GAL1,ST3GAL2,ATP6V0A1,EGR2,TMEM86A,CARMIL2,EDEM2,PMM2,SLC33A1,NFATC2,NBEAL2,ABCA7,CDC6,TRERF1,PARP12,GADD45G,MANF,FOSL1,MOV10,XKR9,ARTN,CALR,C2CD2L,ITM2C,ACVRL1,DENND1C,NRP1,SUV39H2,BTG2,TMEM151B,SH3KBP1,SUV39H1,NCAPG2,KIF11,RCSD1,LIMD2,KIF15,LFNG,MAP1LC3A,SLC22A15,FAM102A,SERP1,MIS18BP1,NUF2,TIMP2,ANXA6,TIMP3,TCP11L2,PLEKHN1,EMB,CEP55,APC2,PSD,APOBEC1,CD53,NDC1,DENND2C,LEFTY1,TMEM150A,WARS,IZUMO1,ROM1,MYOF,KIF24,KIF23,SERPINB9,KIF22,RHOC,F2,RENBP,CBFA2T3,VAV1,ZDHHC14,APBB1IP,RAD51B,RIPPLY3,PLCB4,MDFIC,KIFC1,INCENP,CDC42EP3,ADSSL1,CKS2,PLCB2,VAMP2,DBN1,MGLL,SDCCAG8,CD63,DTYMK,SLC43A2,PKN3,SLC43A3,FAM129A,SNX32,SNX33,CENPA,HSPA13,FGD2,FAM117A,TMEM71,RHD,PSMC3IP,NT5E,PRSS50,CARNS1,LY6G6F,MPZL2,GSN,GCH1,PLEKHA2,GINS3,LAPTM5,SYVN1,RPA2,GPR4,KBTBD6,CENPH,KLHL8,FOSB,CENPP,YPEL3,NRROS,CD83,CHPF,BUB1B,RORA,GIMAP6,NR3C1,TMEM140,GIMAP8,IGF1R,RDM1,RGS2,CCND1,BASP1,CCRL2,CAPN2,TGM2,SPINK4,MYLIP,CD93,LIG1,IGFBP4,IGFBP3,ANKRD44,ZBTB38,ARID5A,ARID5B,VRK1,MPEG1,TLE6,ADAM19,MSH6,DISP2,ARMCX3,RAB30,SLC9A5,SELENOS,MFNG,SLC9A9,S100A6,NUPR1,SLC25A53,SQSTM1,CARD11,INTS6L,RTN2,BRSK1,CALCRL,AKNA,NOTCH1,NOTCH4,TCF7,FBXO48,FUT1,ZFP36L2,SLC9A3R2,GRK2,BCL2L11,GRK5,CLCA1,IGFBP7,ECT2,FAM83D,CCDC141,MYH10,PACSIN1,FN3K,PRNP,SDF2L1,POU2F1,DENND4B,ATP8B2,CAV2,ARHGEF39,OSBPL2,HMGA1,CRIM1,ARHGAP29,HMGA2,DNAJC12,ISG15,IFT20,ISG20,CXCL10,CDK6,GGCX,DLG4,RCAN3,SPIRE1,AMOTL2,CNIH2,XAF1,MAP3K14,MAP3K12,KCNK6,TNFAIP8,DOCK8,CELF2,PDE3B,TNFAIP2,ATP2A3,HMGB2,HSPB1,YBX2,NRARP,LRMP,MCM10,CTDSPL2,ITGAL,RND3,NRGN,SPN,PIDD1,NADK2,MFSD6,PSTPIP1,DUSP10,LBH,ADGRE5,EXO1,EMILIN1,ITGB7,MYBL1,HIST1H1C,SMIM14,PLEKHG1,EGFL7,TGIF2,CAMK1D,ITGA4,ARHGEF15,SH2D3C,PLAUR,HAUS4,PPP2R5B,NAV1,SPTB,CREB3,IMPACT,RCN1,RBL1,RASA3,SAPCD2,VGF,GFOD1,IRF1,OAS3,ADGRF5,MCM3,BIRC5,ANG,DNAJC9,ITGA5,DOCK2,NEMP1,DCTPP1,HEMGN,RGS14,CCDC69,NLRC3,ADD3,MLLT3,THBS1,AURKB,DLL4,ABLIM1,NWD1,SH3BP1,SPOCK2,LRIG1,E2F1,HES1,WASF1,SEC11C,CYB5A,RRM1,CYP4B1,ARID3A,FBXL16,SYT13,KLF4,SORL1,TTC39A,FMNL1,PIK3IP1,DNAJA4,BCL6B,IMPDH2,FAM131A,TRIM38,TEK,VIM","148","241.0","Cluster 3","Ets1","false","false","Cluster 1","Clustered","7.004091174751607","Clustered","10.523809523809524","ENSMUSG00000032035"
"1857","","",,,"Cluster 2","Kcnh2","false","false","Cluster 1","Clustered","6.871794871794871","Clustered","7.73076923076923","ENSMUSG00000038319"
"1345","","",,,"Cluster 1","Cd244","false","false","Cluster 1","Clustered","6.9743589743589745","Clustered","9.454545454545455","ENSMUSG00000004709"
"833","","",,,"Cluster 1","Mpzl2","false","false","Cluster 1","Clustered","6.805555555555555","Clustered","9.0","ENSMUSG00000032092"
"830","","",,,"Cluster 1","Cgnl1","false","false","Cluster 1","Clustered","7.0","Clustered","9.0","ENSMUSG00000032232"
"1853","","",,,"Cluster 1","Susd1","false","false","Cluster 1","Clustered","7.151515151515151","Clustered","8.333333333333334","ENSMUSG00000038578"
"1340","","",,,"Cluster 1","Gnat2","false","false","Cluster 1","Clustered","7.0","Clustered","9.0","ENSMUSG00000009108"
"1337","","",,,"Cluster 1","Bcas1","false","false","Cluster 1","Clustered","7.2727272727272725","Clustered","8.909090909090908","ENSMUSG00000013523"
"1848","","",,,"Cluster 2","Itga9","false","false","Cluster 1","Clustered","6.611111111111111","Clustered","7.111111111111111","ENSMUSG00000039115"
"1336","","",,,"Cluster 2","Pea15a","false","false","Cluster 1","Clustered","7.0","Clustered","8.0","ENSMUSG00000013698"
"1846","","",,,"Cluster 1","Camk1d","false","false","Cluster 1","Clustered","7.0","Clustered","9.0","ENSMUSG00000039145"
"1333","","",,,"Cluster 1","Syt14","false","false","Cluster 1","Clustered","6.805555555555555","Clustered","9.0","ENSMUSG00000016200"
"819","","",,,"Cluster 1","Cck","false","false","Cluster 1","Clustered","7.0","Clustered","9.0","ENSMUSG00000032532"
"1842","","",,,"Cluster 1","Sec24d","false","false","Cluster 1","Clustered","7.080882352941177","Clustered","9.323809523809524","ENSMUSG00000039234"
"1840","","",,,"Cluster 2","Dusp10","false","false","Cluster 1","Clustered","6.805555555555555","Clustered","7.777777777777778","ENSMUSG00000039384"
"813","","",,,"Cluster 2","Afap1l1","false","false","Cluster 1","Clustered","7.0","Clustered","8.0","ENSMUSG00000033032"
"1323","","",,,"Cluster 2","Nxnl2","false","false","Cluster 1","Clustered","7.0","Clustered","7.555555555555555","ENSMUSG00000021396"
"1830","","",,,"Cluster 1","Pacsin1","false","false","Cluster 1","Clustered","6.611111111111111","Clustered","9.0","ENSMUSG00000040276"
"1829","","",,,"Cluster 1","Fam102b","false","false","Cluster 1","Clustered","7.35","Clustered","9.67032967032967","ENSMUSG00000040339"
"1828","","",,,"Cluster 1","Os9","false","false","Cluster 1","Clustered","6.805555555555555","Clustered","9.0","ENSMUSG00000040462"
"804","","",,,"Cluster 1","Tpsb2","false","false","Cluster 1","Clustered","7.0","Clustered","9.0","ENSMUSG00000033825"
"1315","","",,,"Cluster 1","Tcof1","false","false","Cluster 1","Clustered","6.805555555555555","Clustered","10.0","ENSMUSG00000024613"
"801","","",,,"Cluster 1","Tpst1","false","false","Cluster 1","Clustered","7.0","Clustered","9.0","ENSMUSG00000034118"
"796","","",,,"Cluster 1","Cacna1a","false","false","Cluster 1","Clustered","6.805555555555555","Clustered","9.0","ENSMUSG00000034656"
"1303","","",,,"Cluster 1","Suv39h2","false","false","Cluster 1","Clustered","7.151515151515151","Clustered","8.93939393939394","ENSMUSG00000026646"
"1301","","",,,"Cluster 1","Tnfsf4","false","false","Cluster 1","Clustered","7.0","Clustered","10.0","ENSMUSG00000026700"
"1813","","",,,"Cluster 1","Dctpp1","false","false","Cluster 1","Clustered","6.416666666666666","Clustered","9.0","ENSMUSG00000042462"
"1812","","",,,"Cluster 3","Clspn","false","false","Cluster 1","Clustered","7.2727272727272725","Clustered","10.694444444444445","ENSMUSG00000042489"
"787","","",,,"Cluster 2","Melk","false","false","Cluster 1","Clustered","6.805555555555555","Clustered","7.777777777777778","ENSMUSG00000035683"
"1807","","",,,"Cluster 1","Ppp2r3a","false","false","Cluster 1","Clustered","6.533333333333333","Clustered","9.0","ENSMUSG00000043154"
"1295","","",,,"Cluster 1","Npr1","false","false","Cluster 1","Clustered","7.03030303030303","Clustered","8.333333333333334","ENSMUSG00000027931"
"1805","","",,,"Cluster 1","Gls2","false","false","Cluster 1","Clustered","6.681318681318682","Clustered","8.351648351648352","ENSMUSG00000044005"
"1291","","",,,"Cluster 1","Zdhhc21","false","false","Cluster 1","Clustered","7.0","Clustered","9.0","ENSMUSG00000028403"
"1287","","",,,"Cluster 1","Cwh43","false","false","Cluster 1","Clustered","6.533333333333333","Clustered","9.642857142857142","ENSMUSG00000029154"
"773","","",,,"Cluster 1","Tmem71","false","false","Cluster 1","Clustered","7.0","Clustered","9.0","ENSMUSG00000036944"
"1795","","",,,"Cluster 2","Plaur","false","false","Cluster 1","Clustered","6.593406593406593","Clustered","8.241758241758241","ENSMUSG00000046223"
"1281","","",,,"Cluster 1","Pianp","false","false","Cluster 1","Clustered","6.533333333333333","Clustered","10.0","ENSMUSG00000030329"
"256","","",,,"Cluster 1","Gm12603","false","false","Cluster 1","Clustered","7.0","Clustered","9.0","ENSMUSG00000085183"
"255","","",,,"Cluster 1","Gm37306","false","false","Cluster 1","Clustered","6.805555555555555","Clustered","10.0","ENSMUSG00000103043"
"1789","","",,,"Cluster 1","Cldn14","false","false","Cluster 1","Clustered","6.533333333333333","Clustered","8.4","ENSMUSG00000047109"
"253","","",,,"Cluster 1","4632411P08Rik","false","false","Cluster 1","Clustered","7.2727272727272725","Clustered","9.09090909090909","ENSMUSG00000097561"
"764","","",,,"Cluster 1","Arhgef4","false","false","Cluster 1","Clustered","7.0","Clustered","9.0","ENSMUSG00000037509"
"1269","","",,,"Cluster 1","Zc3h12c","false","false","Cluster 1","Clustered","6.9743589743589745","Clustered","8.717948717948719","ENSMUSG00000035164"
"245","","",,,"Cluster 2","C430039J16Rik","false","false","Cluster 1","Clustered","7.0","Clustered","7.619047619047619","ENSMUSG00000097932"
"244","","",,,"Cluster 1","9830004L10Rik","false","false","Cluster 1","Clustered","6.805555555555555","Clustered","10.0","ENSMUSG00000099552"
"243","","",,,"Cluster 1","4930480K23Rik","false","false","Cluster 1","Clustered","6.805555555555555","Clustered","10.0","ENSMUSG00000097284"
"1267","ARCHS4 Coexpression,715;Enrichr Queries,219;GTEx Coexpression,622","IFITM3,KLHL32,MKI67,LGALS3,CCND1,GNAT2,BASP1,DPYSL2,MYC,CHEK2,DPYSL3,STMN1,MYB,ADORA1,LONP1,GRB10,PIP4K2A,DENND5A,PIM2,TGM2,IER3,TMEM88B,EPHA4,POSTN,RSAD2,IGFBP4,IGFBP3,APLP1,IGFBP2,ARID5B,VASH1,ADAM19,CLDN4,RAB37,MFNG,ADAM12,LGALS12,SERPING1,HOXB2,NUPR1,MYL9,EMID1,PDE1C,CACNA1A,LPL,ZFP36L2,CCNB1,CALHM2,INPP5D,IGFBP7,NPTX2,RAB11FIP4,LHPP,NKX2-2,EGR2,ST18,BMP4,ANLN,FA2H,CXCL10,PEX5L,FES,ALPL,CD200,CDKN1C,TOP2A,NRP1,COL18A1,BTG2,HSPB1,LRMP,TFCP2L1,RCSD1,LIMD2,SPN,HHEX,SLC22A15,TUBA1A,TIMP3,MYBL2,CEP55,BCAS1,CD53,EGFL7,AVPR1B,GPX3,ROM1,MYOF,PLAUR,OLIG1,ETV4,CBFA2T3,ZDHHC14,GPRC5B,KIT,MCM5,ITGA5,ASPA,AMER2,UHRF1,SLC43A3,RGS16,FAM129A,ADD3,THBS1,ASCL2,NSL1,AURKB,AGPAT4,FAM117A,SLC17A9,CARNS1,PRRG1,LRIG1,KLRG2,GDF11,IL33,DUT,RRM2,PLCL1,LAPTM5,KLF4,GFI1B,FMNL2,NFIB,FOSB,VIM,TMEM229A","531","518.7","Cluster 1","Zfp57","false","false","Cluster 1","Clustered","6.484962406015038","Clustered","9.441441441441441","ENSMUSG00000036036"
"1266","","",,,"Cluster 1","Ttll7","false","false","Cluster 1","Clustered","6.533333333333333","Clustered","10.0","ENSMUSG00000036745"
"1265","","",,,"Cluster 3","Anln","false","false","Cluster 1","Clustered","7.147058823529411","Clustered","10.68131868131868","ENSMUSG00000036777"
"1264","","",,,"Cluster 1","C1qa","false","false","Cluster 1","Clustered","7.2727272727272725","Clustered","10.0","ENSMUSG00000036887"
"750","","",,,"Cluster 2","Plcl1","false","false","Cluster 1","Clustered","6.611111111111111","Clustered","7.555555555555555","ENSMUSG00000038349"
"1771","","",,,"Cluster 1","Lix1l","false","false","Cluster 1","Clustered","6.805555555555555","Clustered","9.0","ENSMUSG00000049288"
"746","","",,,"Cluster 1","Ccdc68","false","false","Cluster 1","Clustered","7.644444444444445","Clustered","8.6","ENSMUSG00000038903"
"1257","","",,,"Cluster 1","Sv2a","false","false","Cluster 1","Clustered","7.0","Clustered","9.0","ENSMUSG00000038486"
"1765","","",,,"Cluster 2","Lgals3","false","false","Cluster 1","Clustered","6.6838235294117645","Clustered","7.666666666666667","ENSMUSG00000050335"
"229","","",,,"Cluster 1","4930552P12Rik","false","false","Cluster 1","Clustered","7.0","Clustered","9.0","ENSMUSG00000097632"
"737","","",,,"Cluster 2","Arhgap29","false","false","Cluster 1","Clustered","7.0","Clustered","7.555555555555555","ENSMUSG00000039831"
"1760","","",,,"Cluster 1","Spn","false","false","Cluster 1","Clustered","7.2727272727272725","Clustered","9.454545454545455","ENSMUSG00000051457"
"1248","","",,,"Cluster 1","Il17rd","false","false","Cluster 1","Clustered","7.0","Clustered","10.0","ENSMUSG00000040717"
"1247","","",,,"Cluster 2","Pla2g2d","false","false","Cluster 1","Clustered","7.0","Clustered","8.0","ENSMUSG00000041202"
"1757","","",,,"Cluster 1","D630039A03Rik","false","false","Cluster 1","Clustered","6.9743589743589745","Clustered","9.833333333333334","ENSMUSG00000052117"
"221","","",,,"Cluster 1","#N/A","false","false","Cluster 1","Clustered","6.533333333333333","Clustered","10.0","mmu-miR-1945"
"1754","","",,,"Cluster 1","Nrros","false","false","Cluster 1","Clustered","6.533333333333333","Clustered","10.0","ENSMUSG00000052384"
"728","ARCHS4 Coexpression,757;Enrichr Queries,724;GTEx Coexpression,1344","NRP1,BTG2,IRS1,CELF2,PTPRM,RORA,NR3C1,MKI67,ETS1,RND3,ALDH1L2,IGF1R,ELK3,SYNE1,LGALS3,ZC3H12C,RGS2,SH3PXD2A,CCND1,DPYSL2,MYC,CREB3L2,CAPN2,TIMP2,ANXA6,TIMP3,ITGB7,IER3,MBNL1,KLF12,DST,MYOF,ARID5B,NAV1,ASPH,MDFIC,IMPAD1,MAP1B,CDC42EP3,KCNMA1,GEMIN5,LCOR,GART,VGLL3,NOTCH2,SEMA7A,SDC4,FAM114A1,LAMA4,FAM129A,THBS1,AURKB,ZFP36L2,ABLIM1,NT5E,NUAK1,LRIG1,CHML,ST3GAL1,CASP8AP2,PRNP,GSN,ATP8B2,CAV2,AHNAK2,CRIM1,FBXO32,KLF4,SORL1,CDK6,NFIB,FAT4,VIM,ULBP1,ITM2C","1119","941.7","Cluster 1","Zbtb38","false","false","Cluster 1","Clustered","6.5054945054945055","Clustered","8.636363636363637","ENSMUSG00000040433"
"1751","","",,,"Cluster 2","Hunk","false","false","Cluster 1","Clustered","7.0","Clustered","8.0","ENSMUSG00000053414"
"1749","","",,,"Cluster 1","Tanc2","false","false","Cluster 1","Clustered","6.805555555555555","Clustered","9.0","ENSMUSG00000053580"
"1232","","",,,"Cluster 2","Kcnk6","false","false","Cluster 1","Clustered","6.805555555555555","Clustered","8.2","ENSMUSG00000046410"
"719","","",,,"Cluster 2","Dmxl2","false","false","Cluster 1","Clustered","7.0","Clustered","7.0","ENSMUSG00000041268"
"1229","","",,,"Cluster 1","Samd14","false","false","Cluster 1","Clustered","6.805555555555555","Clustered","9.642857142857142","ENSMUSG00000047181"
"716","","",,,"Cluster 1","Rap1gap","false","false","Cluster 1","Clustered","6.805555555555555","Clustered","9.0","ENSMUSG00000041351"
"1739","","",,,"Cluster 1","Fmnl1","false","false","Cluster 1","Clustered","7.05","Clustered","9.833333333333334","ENSMUSG00000055805"
"714","ARCHS4 Coexpression,20;Enrichr Queries,76;GTEx Coexpression,90","CNTFR,IRS1,STMN3,ETS1,CELSR3,RGS4,PREX1,RGS2,RIMS4,SAMD14,CCND1,CDH2,KIF5C,BASP1,DPYSL2,CREB3L1,PALM,DPYSL3,TNR,CCDC92,TGM2,IER3,KCNH3,TLE2,POSTN,UNC5A,TMEM178B,IGFBP4,IGFBP3,APLP1,TTC7B,MAPK8IP2,CPT1C,RUNDC3A,HSPG2,DKK3,MAPK8IP1,CLIP3,ADAM19,OLFM1,ACAP3,GPRIN1,MAP1B,MAP1A,ADAM12,SCG3,MYL9,STX1A,RTN2,BRSK1,NOTCH3,NUMBL,BRSK2,NDRG4,MAGED1,ARHGEF25,STXBP1,GLIS3,CACNA1A,C2CD4C,NREP,CACNA1H,PDZD4,PGBD5,MAP2,MAP6,KIF3C,SCN3B,RAB6B,B4GALNT4,PACSIN1,PRNP,EGR2,TGFB2,SYT1,CADM1,CORO2B,DCLK1,SYT7,GNAO1,CXCL10,DLG4,REEP2,CPE,FXYD6,CNIH2,CDK14,ITM2C,CDKN1C,GPSM1,NRP1,COL18A1,PTPRU,BTG2,TMEM151B,PTPRN,CELF5,HSPB1,JPH4,LFNG,C1QTNF1,TUBA1A,SCRN1,SLC22A17,GDAP1L1,TIMP2,IDS,TIMP3,KIF1A,SULT4A1,STUM,DACT1,PSD,APC2,PIANP,PLAUR,PPP2R5B,FAM219A,SYP,MYRIP,SYN2,SYN1,MN1,TUBB2A,MMP17,KCNMA1,ARHGEF4,MAPRE3,GAS6,PDZRN3,VAMP2,DBN1,RAPGEF4,SMARCD3,SLC43A2,PLPPR2,PRUNE2,CRMP1,LRP3,ADCY1,CXXC5,THBS1,AURKB,NCALD,GNG2,CAMK2N1,SV2A,SLIT1,LRIG1,SPOCK1,NCAM2,MSX1,APBB1,CCDC184,RUNX1T1,GABBR2,GSN,KCNIP3,FAM189A1,CCK,SYT13,PNMA2,KLF4,GRIN1,MAPK11,NFASC,MORN4,ABI2,SYT11,NOVA2,FOSB,APBA1,VIM","12","62.0","Cluster 1","Meis3","false","false","Cluster 1","Clustered","7.0","Clustered","9.0","ENSMUSG00000041420"
"1736","","",,,"Cluster 1","Fry","false","false","Cluster 1","Clustered","6.871794871794871","Clustered","8.58974358974359","ENSMUSG00000056602"
"1735","","",,,"Cluster 1","Glipr1","false","false","Cluster 1","Clustered","6.533333333333333","Clustered","10.0","ENSMUSG00000056888"
"1734","","",,,"Cluster 1","Ero1lb","false","false","Cluster 1","Clustered","6.611111111111111","Clustered","9.0","ENSMUSG00000057069"
"1733","","",,,"Cluster 1","Tmem140","false","false","Cluster 1","Clustered","6.611111111111111","Clustered","10.0","ENSMUSG00000057137"
"709","","",,,"Cluster 1","Amot","false","false","Cluster 1","Clustered","6.533333333333333","Clustered","8.4","ENSMUSG00000041688"
"1220","","",,,"Cluster 1","Upk1b","false","false","Cluster 1","Clustered","7.0","Clustered","9.0","ENSMUSG00000049436"
"1731","","",,,"Cluster 1","Mdn1","false","false","Cluster 1","Clustered","6.805555555555555","Clustered","8.678571428571429","ENSMUSG00000058006"
"705","","",,,"Cluster 1","Phlda3","false","false","Cluster 1","Clustered","6.805555555555555","Clustered","9.0","ENSMUSG00000041801"
"1723","","",,,"Cluster 2","Rcan3","false","false","Cluster 1","Clustered","7.2727272727272725","Clustered","8.181818181818182","ENSMUSG00000059713"
"1722","","",,,"Cluster 1","9430015G10Rik","false","false","Cluster 1","Clustered","7.014705882352941","Clustered","9.54945054945055","ENSMUSG00000059939"
"1720","","",,,"Cluster 1","H2-Q7","false","false","Cluster 1","Clustered","7.0","Clustered","9.0","ENSMUSG00000060550"
"1718","","",,,"Cluster 1","Mdc1","false","false","Cluster 1","Clustered","6.417582417582418","Clustered","10.0","ENSMUSG00000061607"
"691","","",,,"Cluster 1","Gpr153","false","false","Cluster 1","Clustered","6.805555555555555","Clustered","9.0","ENSMUSG00000042804"
"1714","","",,,"Cluster 1","Cks2","false","false","Cluster 1","Clustered","6.764705882352941","Clustered","9.67032967032967","ENSMUSG00000062248"
"1202","","",,,"Cluster 1","C330021F23Rik","false","false","Cluster 1","Clustered","6.533333333333333","Clustered","9.642857142857142","ENSMUSG00000065952"
"690","","",,,"Cluster 1","Serpinb6b","false","false","Cluster 1","Clustered","8.0","Clustered","9.0","ENSMUSG00000042842"
"1713","","",,,"Cluster 2","1810041L15Rik","false","false","Cluster 1","Clustered","7.03030303030303","Clustered","8.181818181818182","ENSMUSG00000062760"
"688","","",,,"Cluster 2","Nemp2","false","false","Cluster 1","Clustered","6.805555555555555","Clustered","8.2","ENSMUSG00000043015"
"1710","","",,,"Cluster 1","Xkr9","false","false","Cluster 1","Clustered","6.533333333333333","Clustered","9.0","ENSMUSG00000067813"
"1709","","",,,"Cluster 1","Spdl1","false","false","Cluster 1","Clustered","6.805555555555555","Clustered","9.0","ENSMUSG00000069910"
"1195","","",,,"Cluster 1","Fbp1","false","false","Cluster 1","Clustered","7.0","Clustered","10.0","ENSMUSG00000069805"
"1707","","",,,"Cluster 2","Tmem132b","false","false","Cluster 1","Clustered","7.0","Clustered","7.555555555555555","ENSMUSG00000070498"
"1704","","",,,"Cluster 1","Pnmal2","false","false","Cluster 1","Clustered","6.533333333333333","Clustered","9.0","ENSMUSG00000070802"
"679","","",,,"Cluster 1","Liph","false","false","Cluster 1","Clustered","8.0","Clustered","8.6","ENSMUSG00000044626"
"1702","","",,,"Cluster 1","Ang","false","false","Cluster 1","Clustered","7.080882352941177","Clustered","8.654411764705882","ENSMUSG00000072115"
"678","ARCHS4 Coexpression,511;Enrichr Queries,96;GTEx Coexpression,853","SEMA5A,GALNT12,EHF,RORA,CWH43,SLC4A4,LGALS3,RGS2,CAPN9,NIPAL2,DPYSL2,CREB3L1,CHEK2,TGM2,EPHA4,IGFBP4,IGFBP3,IGFBP2,ARID5B,SDCBP2,ERN2,CLDN8,ADAM12,LGALS12,SCNN1A,MAL,ZG16,PADI1,NGEF,CAPSL,TSHZ2,ALOX15,GLIS3,PLA2G3,CACNA1A,APCDD1,DTX4,FBLN2,RAP1GAP,ALDH3B2,TRPM2,S100A14,ST3GAL1,TSPAN1,EGR2,TGFB2,CADM1,ARHGEF37,NEBL,BDNF,RAB27B,INHBB,FER1L6,DCLK1,GADD45G,SDK1,CXCL10,GJB2,RAET1E,GJB3,FXYD3,ID4,SDC1,ALPL,SPRR1A,FGFR3,CDKN1C,NRP1,COL18A1,CCDC120,TENM4,LRRC10B,TFCP2L1,KRT20,SDR16C5,MFSD6,MECOM,SH3PXD2A,EFCAB1,CLDN23,TIMP3,PLEKHN1,CNGA4,CGNL1,CFAP45,FGFBP1,CAMK1D,TNFRSF19,MYOF,NAV1,GFRA1,MN1,GPRC5B,PLCB4,ADGRF1,KIT,KCNMA1,TFF3,CCDC190,RHOV,GPRC5C,PDZRN3,MGLL,ITGA9,RGS16,FAM129A,ADCY1,ATP2C2,THBS1,THSD4,AURKB,NCALD,ABLIM1,NWD1,RASSF10,CAMK2N1,KLRG2,SLIT1,LRIG1,AGR2,SLIT2,MPZL2,RUNX1T1,GSN,IRX4,CYP4B1,KLF4,SORL1,MAPK15,SMOC2,RSPH1,TPPP3,FABP5,NFIB,KRT15","477","486.7","Cluster 1","Zbtb7c","false","false","Cluster 1","Clustered","6.9743589743589745","Clustered","9.09090909090909","ENSMUSG00000044646"
"1189","","",,,"Cluster 1","Ifit3","false","false","Cluster 1","Clustered","7.0","Clustered","10.0","ENSMUSG00000074896"
"1701","","",,,"Cluster 1","Tuba1a","false","false","Cluster 1","Clustered","6.769230769230769","Clustered","9.272727272727273","ENSMUSG00000072235"
"1700","","",,,"Cluster 1","H2-Q6","false","false","Cluster 1","Clustered","7.0","Clustered","9.0","ENSMUSG00000073409"
"671","","",,,"Cluster 1","Ccdc149","false","false","Cluster 1","Clustered","6.805555555555555","Clustered","8.678571428571429","ENSMUSG00000045790"
"1182","","",,,"Cluster 1","Grid2ip","false","false","Cluster 1","Clustered","7.0","Clustered","9.0","ENSMUSG00000010825"
"2140","Literature ChIP-seq,52;ARCHS4 Coexpression,531;Enrichr Queries,418;ReMap ChIP-seq,174;GTEx Coexpression,481","IFITM3,GCC2,CWH43,NOC2L,CLDN1,ENO3,IFIT3,IFIT2,CDC20,SPIB,LGALS3,MYC,DPYSL2,STMN1,MYB,CHEK1,LONP1,PIEZO1,LIPK,TNS4,GLUL,IER3,HOXA4,TMEM88B,DNAAF3,RSAD2,SYTL1,MIF,HSPG2,SYTL2,CLDN6,CLDN9,KCNQ1,HOXB4,HOXB3,KCTD12,ZG16,PADI1,NUMBL,SDC4,GIPR,AGAP2,CDCA7,PLA2G3,APCDD1,DSN1,CRACR2B,RDH12,STC2,PDGFC,S100A13,S100A14,KCNN4,ZBTB7C,NKX2-2,BARD1,TMEM86A,EGR2,GSDMA,NBEAL2,ABCA7,CDC6,GADD45G,FOSL1,ANLN,UCK2,XKR9,GJB3,FXYD3,ARTN,LYPD6B,MYO5C,SDC1,CALR,ITM2C,PTPRU,NRP1,COL18A1,BTG2,NRP2,TENM4,ZFAND2A,ICA1,KRT20,PCSK4,HERPUD1,LIMD2,TUBA1B,TUBA1A,CLDN23,NUF2,TIMP2,TIMP3,NEFM,PLEKHN1,CEP55,PSD,HELLS,IZUMO1,MYOF,ROM1,COPZ2,GFRA1,PAX6,IL17RE,KIF22,PROX1,NME5,VAV1,RNF144B,BACE2,MMP16,MMP15,B3GNT5,ADSSL1,ARHGEF4,RHOV,PLCB2,FJX1,VAMP2,DBN1,MGLL,CD63,C1QA,PCNA,PKN3,FAM129A,SEZ6,HOXD13,SNX33,ASCL2,FGD2,TCEAL8,GBX1,ALOX5,USP1,SPTSSB,MSX1,LRRC26,GSN,CDKN2C,ATAD5,SYVN1,GPR4,KRT10,POU4F1,GRIN1,MPHOSPH9,FABP5,NFIB,FOSB,CENPP,FOXA3,MEGF9,FOXA1,FCGBP,CD83,ANKRD35,CHPF,RASL11B,ZWILCH,ZC3HAV1L,RORA,NR3C1,ETS1,RGS2,CCND1,BASP1,KIF5C,SLCO2B1,PDE8A,TGM2,PHLDA3,IL13RA1,MYLIP,KIRREL2,MREG,CD93,IGFBP4,IGFBP3,IGFBP2,ARID5B,SDCBP2,MPEG1,PLA2G15,MSH6,DISP2,DCTD,ACAP3,ERN2,CCNE2,LMX1A,HAT1,S100A6,NUPR1,IGFALS,RELL2,LMX1B,COL17A1,RTN2,NOTCH3,NOTCH1,NOTCH4,FOXO6,LPL,TNFRSF11A,PKMYT1,FUT2,FUT1,ZFP36L2,FUT4,CNN3,SLC9A3R2,NEUROD1,RAD51AP1,ALDH3B2,KLC3,CCNB1,BCL2L11,PODXL,CLCA1,IGFBP7,NPTX1,ECT2,WNT3,FANCI,PRNP,TGFB2,HSPA5,UBE2C,VDR,BDNF,HMGA1,TRPV3,ISG15,INHBB,POU2F3,PALB2,SYT7,ISG20,GNAO1,CXCL10,PTPRE,EFNA3,BFSP1,RGCC,NR4A3,GGCX,NASP,DLG4,LHX1,FEV,SP6,CSPG5,AMOTL2,FGFR3,KCNK6,DYRK3,ONECUT3,DOCK8,TNFAIP2,ATP2A3,HSPB1,YBX2,MCM10,RND3,SDR16C5,PIDD1,ITGB7,MYBL2,MYBL1,CFAP45,HIST1H1C,HS3ST3B1,CAMK1D,DST,GPX3,TNFRSF19,PPP2R5B,PLAUR,ETV1,OLIG1,SSTR1,KLF15,CCNA2,IMPACT,RCN1,VGF,IRF1,ALDH1A1,BIRC5,TRIM59,ITGA5,SPACA6,NEMP1,DTL,MCM2,UHRF1,CRMP1,ATP2C2,CXXC5,MLLT3,THBS1,CXXC4,AURKB,COCH,ASB16,DLL4,SH3BP1,P2RY2,RNF39,LRIG1,HES1,SLIT2,SLC36A4,LRRC8E,JAZF1,PLA2G2F,CYB5A,RRM1,IRX4,AHNAK2,PCDH8,ARID3A,FBXL16,SUOX,KLF4,DLK1,MAPK11,BCL6B,FAM131A,TRIM35,ACKR3,VIM,INSM1,TRIM31","240","331.2","Cluster 3","Klf4","false","false","Cluster 2","Clustered","9.35897435897436","Clustered","10.813186813186814","ENSMUSG00000003032"
"1979","","",,,"Cluster 3","Ccne2","false","false","Cluster 2","Clustered","9.35897435897436","Clustered","11.23076923076923","ENSMUSG00000028212"
"1819","","",,,"Cluster 3","Fzd7","false","false","Cluster 2","Clustered","10.576923076923077","Clustered","12.142857142857142","ENSMUSG00000041075"
"1307","","",,,"Cluster 3","Nrp1","false","false","Cluster 2","Clustered","9.35897435897436","Clustered","11.076923076923077","ENSMUSG00000025810"
"2074","","",,,"Cluster 3","Gadd45g","false","false","Cluster 2","Clustered","10.0","Clustered","11.733333333333333","ENSMUSG00000021453"
"2038","","",,,"Cluster 3","Bambi","false","false","Cluster 2","Clustered","9.696969696969697","Clustered","10.4","ENSMUSG00000024232"
"2166","","",,,"Cluster 3","Rbl1","false","false","Cluster 2","Clustered","10.0","Clustered","11.0","ENSMUSG00000027641"
"1360","","",,,"Cluster 3","Dusp22","false","false","Cluster 2","Clustered","9.696969696969697","Clustered","11.733333333333333","ENSMUSG00000069255"
"1743","","",,,"Cluster 3","Zfp667","false","false","Cluster 2","Clustered","9.848484848484848","Clustered","11.384615384615383","ENSMUSG00000054893"
"1806","","",,,"Cluster 1","E130012A19Rik","false","false","Cluster 2","Clustered","9.35897435897436","Clustered","9.428571428571429","ENSMUSG00000043439"
"2190","Literature ChIP-seq,109;ARCHS4 Coexpression,401;ENCODE ChIP-seq,108;Enrichr Queries,571;ReMap ChIP-seq,187;GTEx Coexpression,403","MDC1,EHF,ANKLE1,NOC2L,SMC4,SMC2,FAM122B,PREX1,CREB3L4,MYC,CREB3L1,MYB,STMN1,AP1S2,PIP4K2A,GTSE1,IER3,MBNL1,DNAAF3,SYTL2,CLDN6,EID2,CLDN9,LGALS12,HOXB4,HOXB3,SERPING1,HOXB2,HOXB8,PRR11,PADI1,CDCA3,SHMT1,ENDOD1,NCAPG,ABCB9,SKA3,IQGAP3,SKA1,CRACR2B,FIGNL1,PDGFC,S100A13,CEP72,LHPP,GSTM4,PLK4,BARD1,SIVA1,EDEM2,ABCA7,CDC6,FOSL1,MOV10,FAM111A,CYP1A1,DENND1C,BTG2,WDR47,ATF7IP2,RCSD1,VSIR,LFNG,CHAF1B,NUF2,TK1,CEP55,HELLS,RMI2,ACTL6B,MYOF,ROM1,COPZ2,WDR31,SERPINB9,APBB1IP,TUBB2A,MMP17,HCST,PLCB2,PLPPR2,FAM129A,FGD2,UNG,ALOX5,METTL7B,TAF9B,GSN,CDKN2C,LAPTM5,SYVN1,BMP8A,TMEM62,RRP1B,STXBP5L,SPSB2,CENPF,TMEM158,FABP5,ETNK1,CCDC8,FOSB,COQ8A,NUCB2,YPEL3,CDKN3,RAB3B,RASL11B,NCF2,RAB3D,GMNN,TNFRSF8,PIM2,SLC16A9,MYLIP,RNF43,TOR3A,ZBTB38,IGFBP3,VRK1,CDC25C,TLE6,TRAIP,MSH6,MELK,ZFP41,TEX9,MFNG,HAT1,S100A6,SLC25A53,XIST,SQSTM1,BLM,SEMA7A,NOTCH1,FAM114A1,TROAP,GMPR,PKMYT1,SLC9A3R2,RAD51AP1,ORC1,ANKRD26,SDF2L1,CCDC15,ZBTB10,PALB2,PTPRE,CXCL10,MFHAS1,CDK6,GGCX,REEP5,CDK1,XAF1,PLEKHM3,KCNK6,SNAP25,MCM8,ONECUT3,MCM10,ITGAL,PIK3CG,NADK2,PSTPIP1,HHEX,DUSP10,LBH,EXO1,ITGB7,SLC36A1,RFC5,TRIM62,TRPC1,SH2D3C,LIX1L,HAUS4,ASPM,IMPACT,ASPH,TMBIM4,BIRC5,TRIM59,DNAJC9,MCM6,NEMP1,DCTPP1,ST6GALNAC4,MCM2,PRPS2,CCDC69,TTK,CXXC5,COCH,NSL1,SLC25A29,SH3BP1,E2F1,AHNAK2,MND1,KLF4,TPD52L1,BAIAP3,DHODH,TSPAN13,SYT11,IMPDH2,TRIM35,SLC25A30,SPAG1,TRIM37,TRIM38,UNC79,IFITM3,SLC46A3,FAM89A,AQP9,GCC2,IFIT3,IFIT2,LGALS3,C1GALT1C1,CHEK2,RASSF5,SPATA24,TNFSF10,LONP1,PIEZO1,SKP2,PDK1,TIPIN,RSAD2,SP110,KNL1,NEIL3,IFI27,RRAGB,RIN3,KIF20B,STX1A,RWDD2A,SDC4,GIPR,ARX,PIK3R5,INPP5D,ST8SIA4,CEP192,KCNN4,ATP6V0A1,EGR2,SLC35E4,XRCC2,OSGIN1,RAB27A,NBEAL2,PYCR2,PARP12,CALR,C2CD2L,ITM2C,ATR,SUV39H2,CD40,ECM1,ZFAND2A,SUV39H1,BRCA1,KIF11,LIMD2,KIF15,SCML2,XPO4,IDS,FFAR2,CD53,PSD,WARS,TMEM150A,IZUMO1,KIF24,KIF23,RHOC,CBFA2T3,VAV1,ZDHHC14,PARP8,RAD51B,HCK,KIF2C,TLR6,CD63,DTYMK,PCNA,STX17,SLC43A3,PRIM1,PTGER3,TYMS,PSMC3IP,OS9,RAD54L,MSX1,GINS1,GCH1,LHFPL5,RPA2,KRT10,ALDH4A1,GFI1B,MIS18A,GPAM,KLHL7,SGSM3,KLHL8,TRIP13,MEGF9,GALNT12,STEAP3,CD83,ZFAND4,ZWILCH,DSCC1,KLHL32,BUB1B,TMEM140,ETS1,GIMAP8,CNDP2,RDM1,SYDE2,RGS2,CCND1,CCRL2,DENND5A,ENPP3,TGM2,ZBP1,PDIA3,LIG1,RUNDC3A,PDIA6,ADAM19,SELENOS,DKC1,GPRIN1,FAM185A,SCNN1A,ANKS6,GEMIN5,NUPR1,RELL2,RTN2,AKNA,FUT1,ZFP36L2,SYCE2,CCNB2,GRK2,NLRP6,NPHP3,FAM83D,PRNP,STIL,TGFB2,DENND4B,CAV2,VDR,HMGA1,ARHGAP29,ISG15,SSC5D,KLHL23,ARHGAP23,ISG20,GCLC,DIAPH3,CPS1,FES,DLG4,BAMBI,DNAJC10,TAF4B,AMOTL2,FGFR3,LRP11,DOCK8,PDE3B,TNFAIP2,ATP2A3,HSPB1,CTDSPL2,CHTF18,PIDD1,ADGRE5,MYBL2,IFT57,CFAP45,HIST1H1C,EGFL7,PPP2R5B,PLAUR,CKAP2,IQCD,GPCPD1,SPIDR,FGR,ADGRF1,RBL1,RASA3,GFOD1,IRF1,OAS3,IRF7,ATP6V1B2,MCTP2,DOCK2,LTK,RGS14,RGS13,RGS16,THBS1,USP18,AURKB,AGPAT4,DLL4,POLD2,LRIG1,NRIP3,HES1,BUB1,QPCTL,ARID3A,SUOX,FMNL1,MLPH,ALOX5AP,CFAP36,VIM,SSBP2,SNTB1","201","296.5","Cluster 1","Irf1","false","false","Cluster 2","Clustered","10.766550522648084","Clustered","10.272727272727273","ENSMUSG00000018899"
"1804","","",,,"Cluster 3","Cep68","false","false","Cluster 2","Clustered","10.0","Clustered","11.076923076923077","ENSMUSG00000044066"
"2186","Literature ChIP-seq,64;ARCHS4 Coexpression,94;ENCODE ChIP-seq,16;Enrichr Queries,6;ReMap ChIP-seq,195;GTEx Coexpression,5","MDC1,NOC2L,SMC4,ENO3,SMC2,ZC3H12C,PREX1,CREB3L4,MYC,DPYSL2,STMN1,MYB,AP1S2,PIP4K2A,RTTN,GTSE1,HOXA4,IER3,MBNL1,DAPK1,CACNA2D1,SYTL1,RNASE4,KNSTRN,EML1,WDR76,CLDN6,ZC2HC1C,EML5,CLDN9,TYRO3,PRR11,ASF1B,PIF1,CDCA3,SHMT2,SHMT1,AGAP2,CDCA7,NCAPG,SKA3,IQGAP3,SLC5A3,NCAPH,SKA1,CRACR2B,FIGNL1,S100A13,CEP72,PLK4,BARD1,SIVA1,PLK1,ABCA7,CDC7,CDC6,FOSL1,FAM111A,FA2H,XKR9,FERMT2,NCAPG2,JPH1,CHAF1B,TUBA1B,CHAF1A,TMEM44,IMPA2,NUF2,PBK,TK1,PLEKHN1,CEP55,TCF19,APC2,TEAD4,CEP68,HELLS,RMI2,CLUH,ROM1,COPZ2,EMP2,WNT9A,MANEAL,DDB2,CIT,TUBB2A,KIFC1,INCENP,PLSCR4,CKS2,KIFC3,GAS6,HCST,GART,VAMP2,SLC29A2,PHLPP1,PKN3,SNX32,SNX33,ADCY1,CENPA,SLC7A2,UNG,FGD2,TCOF1,MBNL3,P4HTM,LRRC26,CENPU,CASP8AP2,CDKN2C,SLC16A1,ATAD5,GPR55,ATAD2,SYVN1,TMEM62,RRP1B,AGT,TTLL7,CENPE,SPSB2,CENPF,CENPH,FABP5,CENPI,NFIB,CENPM,FOSB,CENPN,YPEL3,NUCB2,CDKN3,IRS1,GMNN,ZFP30,TNFRSF8,ANKRD44,IGFBP3,VRK1,CDC25C,TRAIP,MSH6,ACAP3,MELK,MSH2,TEX9,SQSTM1,BLM,DNMT1,SEMA7A,KHDRBS3,FAM114A1,TROAP,HVCN1,PKMYT1,RAD51AP1,BCL2L11,ORC1,FANCI,CCDC18,SDF2L1,OSBPL5,FANCB,PALB2,BFSP1,CDK6,LHX1,DMXL2,CDK1,HPSE,MAP3K14,MCM8,CDCA7L,MCM10,ZC3H6,FOXM1,SPN,NADK2,SCRN1,EXO1,ITGB7,SPDL1,TRIM67,RFC5,RFC3,RFC4,ITGA4,HAUS4,MMS22L,ASPM,DBF4,NEMP2,SAPCD2,ESPL1,TMBIM4,ASPH,MCM3,MCM4,BIRC5,LCOR,TRIM59,MCM5,DNAJC9,MCM6,MTFR2,NEMP1,DTL,DCTPP1,MCM2,UHRF1,TTK,CXXC5,SLC25A29,E2F1,DNAJB9,SLC36A4,E2F7,E2F8,DUT,SPAG5,MND1,FBXL16,KLF4,RAD51,PRC1,IMPDH2,TRIM35,TRIM37,LRR1,CCNF,MKI67,CDC20,MCIDAS,CHEK2,NIPAL2,CHEK1,LONP1,DZIP1L,PIEZO1,FBXO5,SKP2,FBXO9,TIPIN,KNL1,ESCO2,MIF,NEIL3,DNA2,KIF20B,SDC4,STXBP1,EIF5A2,DSN1,STRIP2,RACGAP1,STC2,KCNN4,SCN3B,DDIAS,STAC,XRCC2,SLC33A1,NBEAL2,PYCR2,TPX2,POLA1,ANLN,PM20D2,CALR,C2CD2L,ATR,TOP2A,SUV39H2,NRP2,SH3KBP1,SUV39H1,KIF14,BRCA1,KIF11,BRCA2,PCSK4,KIF15,SLC22A15,XPO4,MIS18BP1,SLC22A17,CLDN23,TMED3,QSOX2,PSD,TMEM150A,KIF24,KIF23,SYP,KIF22,TUBG2,RENBP,B3GNT9,PITPNM3,KIT,KIF2C,CRELD2,DBN1,VGLL3,CD63,DTYMK,PCNA,PRIM1,ZDHHC23,GREB1L,TYMS,PSMC3IP,EXOSC8,RAD54L,GINS1,GDF11,GCH1,PLEKHA2,GINS3,RPA1,RPA2,MIS18A,KBTBD6,AUNIP,TRIP13,SPC24,MAD2L1,MEGF9,ERCC6L,ZWILCH,DSCC1,BUB1B,ETS1,SYDE2,CCND1,KNTC1,PDE8A,LIG1,KCTD1,PLA2G15,CCNE2,DKC1,RTN2,ARHGAP19,ZFP36L2,CCNB2,SYCE2,CCNB1,GRK2,CLSPN,ECT2,FAM83D,MARK1,PRNP,STIL,CBX5,DENND4B,UBE2C,ARHGEF39,HMGA1,HMGA2,DNAJC12,ISG15,AHI1,SDK1,EFNA3,DAP,DIAPH3,NASP,DLG4,UBE2T,AMOTL2,GPSM1,DYRK3,TNFAIP8,PDE3B,HMGB2,HSPB1,YBX2,CTDSPL2,CHTF18,LMNB1,PIDD1,MFSD6,MYBL2,TOPBP1,MYBL1,POLE,HIST1H1C,CKAP2,TBC1D8,MASTL,SYNGR4,SPIDR,CCNA2,RBL1,VGF,IRF1,OAS3,GNB1L,DOCK2,HCN4,DDC,THBS1,USP18,AURKB,AURKA,CHSY1,POLD1,NT5DC2,POLD2,LRIG1,HES1,BUB1,RRM1,RRM2,QPCTL,ARID3A,NAP1L1,TICRR,FMNL3,MLPH,BCL6B,FAM131A","15","63.33","Cluster 3","E2f1","false","false","Cluster 2","Seed","11.586206896551724","Clustered","11.586206896551724","ENSMUSG00000027490"
"2121","","",,,"Cluster 1","Adssl1","false","false","Cluster 2","Clustered","10.0","Clustered","9.323809523809524","ENSMUSG00000011148"
"2185","Literature ChIP-seq,62;ARCHS4 Coexpression,681;Enrichr Queries,422;ReMap ChIP-seq,269;GTEx Coexpression,747","EHF,ANKLE1,GFI1,AQP9,CWH43,MKI67,ENO3,SMC4,IFIT3,IFIT2,CDC20,LGALS3,PREX1,CREB3L4,RASSF5,MYC,CREB3L1,DPYSL2,CHEK2,NIPAL2,MYB,TNFSF10,LONP1,AP1S2,PIEZO1,DPF3,THSD7A,IER3,MBNL1,IL1R1,RNASE4,CLDN6,CLDN4,IFI27,CLDN9,KCNQ1,HOXB2,ZG16,KCTD12,SDC4,PDE1B,CDCA7,SLCO5A1,TRPM2,CRACR2B,PGBD5,INPP5D,PDGFC,FAM43A,HIVEP3,KCNN4,ST3GAL1,TSPAN1,ST3GAL2,PPARGC1B,EGR2,REG4,EIF2AK3,RAB27A,NFATC2,ABCA7,FER1L6,TRERF1,FOSL1,TPX2,MOV10,FXYD3,GJB3,ARTN,SDC1,CALR,ITM2C,TOP2A,RET,NRP1,PCSK1,BTG2,ZFAND2A,KRT20,RCSD1,HERPUD1,LIMD2,LFNG,TUBA1B,SLC22A15,SH3PXD2A,CLDN23,TIMP2,TIMP3,PLEKHN1,TK1,EMB,APC2,PSD,APOBEC1,NDC1,ROM1,MYOF,IL17RE,KIF22,RHOC,RENBP,VAV1,ZDHHC14,HCK,ANGPTL6,CDC42EP3,TFF3,KIF2C,GAS6,PLCB2,VAMP2,DBN1,MGLL,PHLPP1,SLC43A2,COL11A2,FAM129A,SNX33,ASCL2,GNAI1,PTGS1,FAM117A,FGD2,RAD54B,NT5E,CARNS1,GCNT3,CHML,RUNX1T1,CDKN2C,GSN,GK,SYVN1,LAPTM5,GUCA2B,SORBS3,GUCA2A,RFLNA,RIT1,TTC8,FABP6,KRT15,SGSM3,FOSB,COQ8A,MAD2L1,FOXA1,FCGBP,NRROS,IRS1,RAB3D,RORA,NR3C1,FRY,ETS1,PLB1,RGS2,CCND1,BASP1,TNR,LZTS1,TGM2,IL13RA1,SPINK4,RNF43,CHRNB4,CD93,IGFBP4,IGFBP3,MITF,SDCBP2,MUC3A,PDIA5,PLA2G15,ADAM19,DCTD,PROCR,OBSCN,RAB37,SCNN1A,S100A6,NUPR1,SCG2,CARD11,INTS6L,COL17A1,SEMA7A,BLM,CPB2,NOTCH1,CCDC149,ARHGAP19,LPL,SLC1A3,TNFRSF11A,PKMYT1,CPLX2,FBLN2,ZFP36L2,FUT4,SLC9A3R2,KLC3,GRK2,FGGY,BCL2L11,NLRP6,GRK5,CLCA1,IGFBP7,PRNP,SLC14A1,CBX5,VDR,HMGA1,B3GALT5,CORO2B,SYT7,IFT20,BMP4,PYY,CXCL10,PTPRE,DIAPH3,CDK6,GGCX,DLG4,FES,UBE2T,SP6,MAP3K12,PIWIL4,CELF2,TNFAIP2,HSPB1,YBX2,LMNB1,SPN,PIDD1,DUSP10,ADGRE5,ITGB7,CFAP45,HIST1H1C,SLC36A1,SLC13A1,GPX3,URAD,PLAUR,IQCD,SSTR5,ETV6,DUSP22,SAPCD2,MEP1B,IRF1,CDHR5,ANG,ITGA5,MTFR2,MCTP2,FBP1,PRPS2,UHRF1,RGS16,LENG9,ATP2C2,CXXC5,THBS1,AURKB,AGPAT4,MUC2,SV2C,SH3BP1,CHSY1,P2RY2,LRIG1,HES1,NCAM2,ATOH1,GALNT5,RRM2,KCNIP3,ARID3A,FBXL16,PPP2R3A,KLF4,TTC39A,XPNPEP2,IMPDH2,FAM131A,TRIM35,VIM,TRIM38,MYO1H,SNTB1","399","436.2","Cluster 1","Vdr","false","false","Cluster 2","Clustered","9.522267206477732","Clustered","8.440579710144927","ENSMUSG00000022479"
"2182","Literature ChIP-seq,37;ARCHS4 Coexpression,533;ENCODE ChIP-seq,57;Enrichr Queries,885;ReMap ChIP-seq,276;GTEx Coexpression,906","EHF,AQP9,KLHDC7A,ENO3,ZC3H12C,PREX1,RINL,CREB3L4,DPYSL2,MYC,RASSF5,CREB3L2,STMN1,DPYSL3,PIEZO1,TNS4,SKP2,IER3,CHGB,MBNL1,RSAD2,IL1R1,DAPK2,HSPG2,ISL1,DKK3,CLDN6,CLDN9,MAP1B,KCTD12,STX1A,SDC4,CDCA7,MGST2,SKA3,PIK3R5,TRPM2,CRACR2B,RACGAP1,PCBP3,PDGFC,S100A13,FAM43A,S100A14,SCN3B,ST3GAL1,TSPAN1,PPARGC1B,SLC19A2,NGFR,NFATC2,ABCA7,FOSL1,POLA1,TPX2,FA2H,PEX5L,H2AFY2,TH,PKIA,PDE3A,CALR,RGL1,FERMT2,ITM2C,RET,NRP1,CD40,BTG2,KCNC1,SH3KBP1,ICA1,BRCA1,RCSD1,HERPUD1,GLIPR1,C1QTNF1,TUBA1A,IMPA2,ANXA6,TIMP2,TIMP3,TK1,EMB,CEP68,CD53,LEFTY1,TMEM150A,MYOF,COPZ2,GFRA1,IL17RE,CNKSR2,RIPPLY3,PLCB4,MDFIC,CDC42EP3,PLSCR4,KCNMA1,KIF2C,CRELD2,VAMP2,MGLL,PAPLN,FAM129A,SNX33,GNAI1,GPR153,RAD54L,METTL7B,CASP8AP2,GSN,GCH1,PLEKHA2,RPA1,LAPTM5,GPR4,SORBS3,GUCA2A,SPSB2,TTC8,NFIB,KRT15,RIMBP2,FOSB,SPC24,NUCB2,MEGF9,SEMA5A,RAB3C,ERCC6L,CD83,IRS1,DSCC1,RAB3D,RORA,ETS1,HID1,IGF1R,RGS2,CCND1,CDH2,SLCO2B1,CCRL2,CAPN2,GRB10,TNFRSF8,TNR,SH2D6,LZTS1,TGM2,PHLDA3,SPINK4,KCNH2,MREG,KCNH6,IGFBP4,ZBTB38,IGFBP3,ARID5B,MITF,VRK2,DISP2,OLFM1,FAM185A,SCNN1A,S100A6,GEMIN5,ANKS6,SQSTM1,SCG2,RTN2,SEMA7A,FBXO48,ITPR2,ZFP36L2,SLC9A3R2,TMEM245,SCUBE1,PODXL,PRNP,POU2F1,HSPA5,SYT1,ARHGEF39,TMEM132B,HTR1D,CRIM1,ARHGAP29,FANCB,TMPRSS15,ISG20,EFNA3,BFSP1,CDK6,FGF14,DLG4,BAMBI,CPE,SPIRE1,AMOTL2,KCNK6,SNAP25,TRIM72,TNFAIP8,PSCA,CELF2,DOCK8,RASGRF1,HSPB1,CTDSPL2,RND3,SYNE1,PIDD1,MCF2L,SPDL1,A4GALT,IFT57,CFAP45,HIST1H1C,SLC36A1,DST,ITGA4,PLAUR,IQCD,AXIN2,SSTR1,UPK3B,KLF15,SPTB,RCN1,RBL1,VGF,ASPH,ADORA2A,GFOD1,IRF1,IMPAD1,ITGA5,DOCK2,DDC,CCDC69,CRMP1,LRP3,CXXC5,ADD3,USP18,THBS1,AURKB,NT5DC2,ATOH8,LRIG1,NHS,DNAJB9,NRIP3,HES1,PDE6A,SLIT2,BUB1,E2F7,CHGA,CYB5A,TPBG,CADPS,MND1,FBXL16,SYT13,KLF4,SORL1,MAPK11,SLC4A8,FAM167A,NFASC,MLPH,PIK3IP1,TRIM35,VIM,HCN1","414","449.0","Cluster 1","Nr3c1","false","false","Cluster 2","Clustered","10.23764705882353","Clustered","10.07315233785822","ENSMUSG00000024431"
"1925","","",,,"Cluster 1","Egln1","false","false","Cluster 2","Clustered","9.696969696969697","Clustered","9.899999999999999","ENSMUSG00000031987"
"1699","","",,,"Cluster 3","Osgin1","false","false","Cluster 2","Clustered","9.544117647058824","Seed","12.933333333333334","ENSMUSG00000074063"
"1761","","",,,"Cluster 3","Gfod1","false","false","Cluster 2","Clustered","10.0","Clustered","11.23076923076923","ENSMUSG00000051335"
"1759","","",,,"","Dock8","false","false","Cluster 2","Clustered","9.487179487179487","Unclustered","11.23076923076923","ENSMUSG00000052085"
"2174","","",,,"Cluster 3","Ccnd1","false","false","Cluster 2","Clustered","9.382352941176471","Clustered","11.375","ENSMUSG00000070348"
"2014","Literature ChIP-seq,142;ARCHS4 Coexpression,125;Enrichr Queries,12;GTEx Coexpression,661","GFI1,CCNF,MKI67,SMC4,SMC2,CDC20,PREX1,DPYSL2,MYC,CHEK2,MYB,STMN1,CHEK1,PIEZO1,FBXO5,SKP2,GTSE1,IER3,MBNL1,KNL1,ESCO2,WDR76,NEIL3,DNA2,KIF20B,PRR11,ASF1B,CDCA3,CDCA7,NCAPG,SKA3,IQGAP3,NCAPH,SKA1,PIK3R5,RACGAP1,INPP5D,FIGNL1,STC2,PLK4,BARD1,EGR2,DDIAS,PLK1,CDC7,CDC6,FOSL1,POLA1,TPX2,ANLN,DENND1C,TOP2A,BTG2,NCAPG2,KIF14,BRCA1,KIF11,SERPINA9,BRCA2,LIMD2,KIF15,GLIPR1,CHAF1B,CHAF1A,NUF2,PBK,ANXA6,TK1,EMB,CEP55,TCF19,HELLS,MYOF,KIF23,PARP8,CIT,KIFC1,INCENP,CKS2,KIF2C,HCST,PLCB2,PCNA,PRIM1,FAM129A,TYMS,CENPA,FAM117A,NT5E,RAD54L,GINS1,CENPU,CDKN2C,ATAD5,SUSD1,ATAD2,CENPE,CENPF,CENPI,CENPM,CENPN,TRIP13,SPC24,CDKN3,MAD2L1,ERCC6L,ZWILCH,DSCC1,GMNN,BUB1B,ETS1,RGS2,CCND1,CAPN2,KNTC1,TGM2,ZBP1,ANKRD44,IGFBP3,VRK1,CDC25C,MELK,CCNE2,CARD11,TRABD2B,NOTCH2,BLM,AKNA,TROAP,TCF7,ARHGAP19,LIN7A,PKMYT1,RAD51AP1,CCNB2,CCNB1,BAG2,CLSPN,ECT2,FAM83D,FANCI,STIL,ATP8B2,UBE2C,ARHGEF39,CRIM1,ARHGAP29,ISG20,CXCL10,DIAPH3,CDK6,UBE2T,CDK1,PIWIL4,HMGB2,MCM10,LRMP,ITGAL,FOXM1,RND3,LMNB1,PSTPIP1,ADGRE5,EXO1,ITGB7,MYBL2,SPDL1,TOPBP1,HIST1H1C,KLF12,RFC3,RFC4,ITGA4,PLAUR,CKAP2,MASTL,KCNAB3,SYNGR4,CCNA2,ASPM,RBL1,DBF4,ESPL1,RASA3,MCM3,MCM4,BIRC5,MCM5,TRIM59,MCM6,DOCK2,DTL,FBP1,UHRF1,NLRC3,TTK,THBS1,AURKB,AURKA,E2F1,LRIG1,BUB1,E2F7,E2F8,RRM1,RRM2,SPAG5,KLF4,FMNL1,RAD51,PRC1,TRIM38,VIM,CD244","140","235.0","Cluster 3","Mybl1","false","false","Cluster 2","Clustered","11.255172413793103","Clustered","11.255172413793103","ENSMUSG00000025912"
"1788","","",,,"Cluster 2","Fam221a","false","false","Cluster 4","Clustered","5.5","Clustered","7.333333333333333","ENSMUSG00000047115"
"1371","","",,,"Cluster 2","Cnr1","false","false","Cluster 4","Clustered","5.5","Clustered","7.333333333333333","ENSMUSG00000044288"
"1881","","",,,"Cluster 1","Hist1h1c","false","false","Cluster 4","Clustered","5.2","Clustered","10.0","ENSMUSG00000036181"
"1305","","",,,"Cluster 2","Il1r1","false","false","Cluster 4","Clustered","5.2","Clustered","7.333333333333333","ENSMUSG00000026072"
"1201","","",,,"","Impad1","false","false","Cluster 4","Clustered","4.761904761904762","Unclustered","8.0","ENSMUSG00000066324"
"1297","","",,,"Cluster 1","Postn","false","false","Cluster 4","Clustered","5.066666666666666","Clustered","9.0","ENSMUSG00000027750"
"1327","","",,,"Cluster 1","Agr2","false","false","Cluster 4","Clustered","4.761904761904762","Clustered","9.0","ENSMUSG00000020581"
"2094","","",,,"Cluster 1","Slc36a1","false","false","Cluster 4","Clustered","5.4743589743589745","Clustered","9.0","ENSMUSG00000020261"
"747","Literature ChIP-seq,160;ARCHS4 Coexpression,829;Enrichr Queries,627;GTEx Coexpression,401","FOXA1,MDC1,ERCC6L,SLC35B1,AQP9,NOC2L,ETS1,SMC4,IFIT3,IFIT2,SYDE2,RDM1,LGALS3,RGS2,CCND1,MYC,CHEK2,DPYSL3,CHEK1,LONP1,PIEZO1,FBXO5,HOXA4,TGM2,IER3,FBXO9,KCNH2,EPHA4,EPHA7,IGFBP4,IGFBP3,ARID5A,ARID5B,RNASE4,HSPG2,EML1,ADAM19,MSH6,PLA2G15,SELENOM,CCNE2,ADAM12,S100A6,KCNQ4,HOXB3,HOXB2,KCTD12,HOXB8,MYL9,PRR11,ASF1B,BLM,NOTCH1,RWDD2A,ARHGEF25,NPR1,CACNA1A,CACNA1C,IQGAP3,CACNA1H,ASIC5,BAG2,RACGAP1,PRKAR2B,SARAF,CLSPN,FAM83D,MDN1,ATP6V0A1,ZBED3,ASIC1,PLK4,NGFR,EGR2,TGFB2,GSTM1,POU2F1,OSBPL5,RBPMS,FZD7,PMM2,HMGA1,EIF2AK3,HMGA2,RAB27A,KLHL23,SSC5D,RAB27B,FANCB,CDC6,FOSL1,BMP4,BMP3,CXCL10,TPX2,CDK6,DNAJC10,CALR,FERMT2,ITM2C,XKR5,TOP2A,NRP1,COL18A1,NRP2,DYRK3,TGFB1I1,ZFAND2A,DOCK8,NCAPG2,HSPB1,LRMP,PIK3CG,LMNB1,NRGN,SPN,GMPPB,HHEX,GLIPR1,C1QTNF1,CHAF1A,MECOM,EXO1,DNER,NUF2,TIMP3,TCP11L2,EMILIN1,IFT57,CC2D2A,POLE,CD53,PLAUR,CKAP2,NME4,PAX6,KIF22,NME5,KCNAB3,RAD51B,ASPM,IMPACT,INCENP,KIFC1,IRF1,B3GNT5,KCNMA1,MCM3,PECAM1,CKS2,PLEKHO1,KIF2C,PDZRN3,DTL,MGLL,SDCCAG8,OPRD1,DTYMK,ACSS2,PKN3,CCDC69,LAMA4,PRUNE2,FAM129A,MLLT3,THBS1,CENPA,HSPA13,AURKB,POLD1,SLIT1,LRIG1,SLIT2,MSX1,BUB1,RUNX1T1,CYB5A,GSN,CDKN2C,SLC16A1,TPBG,SYVN1,TMEM62,KLF4,TICRR,DHODH,RAD51,ABI2,FOSB,VIM,MAD2L1","510","504.3","","Hoxb4","false","false","Cluster 4","Clustered","4.606060606060606","Unclustered","4.606060606060606","ENSMUSG00000038692"
"2091","","",,,"Cluster 2","Pik3cg","false","false","Cluster 4","Clustered","5.2","Clustered","7.333333333333333","ENSMUSG00000020573"
"1129","Literature ChIP-seq,29;ARCHS4 Coexpression,538;ENCODE ChIP-seq,51;Enrichr Queries,344;ReMap ChIP-seq,47;GTEx Coexpression,351","EHF,CLDN1,SLC4A4,TMEM92,ELK3,MTBP,PREX1,CREB3L4,LIPH,CREB3L1,MYC,MYB,HOXA4,IER3,PRKCI,MBNL1,UNC5A,RBFOX3,DAPK1,SERPINF2,RNASE4,HSPG2,SYTL2,CLDN4,RBP4,CLDN8,PRR11,MYL9,NGEF,ASF1B,PIF1,LIPT1,TPH1,SHMT2,CDCA7,ENDOD1,SLCO5A1,LYPD6,CRACR2A,CRACR2B,S100A13,CEP72,SLC19A2,FZD3,DNAH11,GSDMA,CADM1,NEBL,EIF2AK3,NFATC2,NR0B2,GJB2,UCK2,XKR9,FXYD3,PKIA,FXYD6,CDK14,FERMT2,MESP2,RET,BTG2,TFCP2L1,JPH1,LFNG,TUBA1B,FAM102A,CHAF1A,MECOM,UCN3,IMPA2,TCP11L2,TK1,CGNL1,CEP68,TEAD4,DENND2C,RMI2,LEFTY1,KCND3,ARG1,ELOVL2,MYOF,EMP2,F2,DDB2,BACE1,BACE2,GPRC5B,PLCB4,PLCB1,GPRC5C,VAMP2,SLC29A2,RAPGEF4,PHLPP1,PRUNE2,PELI2,FAM129A,AFP,FAM214A,HSPA13,SLC7A2,RASSF10,AGR2,GCNT3,MBNL3,SPDEF,EGLN1,CENPU,GSN,ATAD5,MGMT,ATAD2,SYVN1,FMO5,AGT,GUCA2A,RFLNA,CENPE,FABP5,NFIB,FOSB,CENPN,COQ8A,TMEM229A,LGR5,YPEL3,FRYL,RAB3C,OLFML2B,IRS1,PROS1,HID1,ZFP30,GRB10,PIM2,IL13RA1,CD177,KCNH2,RNF43,KCNH6,IGFBP4,IGFBP3,IGFBP2,MITF,FRMD4A,CDC25C,SDCBP2,MYT1,RAB30,MTNR1A,MELK,MSH2,RAB36,SLCO2A1,S100A6,IGFALS,SQSTM1,PFKFB1,CPB2,CEMIP,GPR85,ITPR2,LIN7A,PKMYT1,SLC9A3R2,BCL2L11,BAG2,PGK1,IGFBP7,SRGAP1,DRD3,SLC14A2,SDF2L1,AMBP,BTN2A2,OSBPL2,ZBTB10,FANCB,FBXO32,PALB2,CXCL10,PTPRE,BFSP1,GGCX,REEP5,RCAN3,DMXL2,CDK1,PLEKHM3,PSCA,CDCA7L,NRARP,CELF6,ZC3H6,SYNE4,NADK2,DUSP10,LBH,EXO1,BCAS1,SMIM14,PEG3,DUSP22,DBF4,NEMP2,ASPH,SAPCD2,MCM3,MCM4,ANG,TRIM59,MCM6,AGXT,NEMP1,ASPA,PLEKHH2,ACSS2,CCDC68,NTN4,LRP3,MLLT3,CXXC5,CXXC4,THSD4,NSL1,ABLIM1,RNF39,E2F1,SLC12A2,CYB5A,DUT,ANGPT2,TRPA1,RNF24,KCNJ11,AHNAK2,MBOAT4,KLF4,TPD52L1,SORL1,TTC39A,BAIAP3,MAB21L3,TSPAN13,SLC25A30,SPAG1,TRIM37,CBLN3,CPNE4,DIXDC1,KLHDC7A,GCC2,MKI67,LGALS3,SYNPR,RPS6KA6,MCIDAS,VSIG1,NIPAL2,CHEK2,RASSF6,TNFSF10,PIEZO1,THSD7A,SKP2,GLUL,HABP2,SP110,OVOL2,PLPP5,IFI27,KIF20B,SDC4,EPB42,GIPR,PDE1B,CAPSL,STXBP1,MGST2,STC1,STRIP2,RACGAP1,MAP2,STC2,FAM43A,PCK1,TSPAN1,MAP9,CARMIL2,FER1L4,DTNA,TNFSF15,XRCC2,RAB27B,RASSF9,SMARCA1,TRERF1,GADD45G,TPX2,PM20D2,AKR1B10,RAET1E,KLHDC8A,MYO5C,ID4,SPATS2L,SDC1,MAGED2,C2CD2L,ITM2C,NRP1,PTPRR,SH3KBP1,MIA3,KIF11,CX3CL1,HERPUD1,PCLO,SH3PXD2A,CTSK,TMED3,QSOX1,FFAR2,CTSF,LMCD1,WARS,KIF24,GFRA1,PROX1,SYP,GFRA3,RNF144B,KIF9,NR5A2,B3GNT6,KIT,TFF3,TFF2,ARHGEF4,SGK2,PDZRN3,PRIM1,SLC43A1,GNAI1,MFSD4A,OS9,CAMK2N1,HSD17B2,SPTSSB,IL33,KLHL3,SORBS2,SORBS3,KLHL5,SGSM3,KRT15,QPCT,KLHL8,FKBP1B,GHRL,RAMP1,FOXA3,SPC24,MEGF9,FOXA1,GALNT12,FCGBP,ZFAND4,ZWILCH,GALNT18,TMEM140,ETS1,IGF1R,SYDE2,RGS4,SCGN,CAPN8,RGS2,CAPN9,CCND1,KIF5C,CCRL2,CAPN2,PDE8B,TGM2,POSTN,G6PC,TTC7B,ARID5A,ARID5B,ANXA10,PDIA5,ERN2,CCNE2,SELENOS,DKC1,SCNN1A,SIDT1,LMX1B,NUPR1,AKNA,NPR1,SLC41A2,ZFP36L2,CACNA1H,CNN3,ALDH3B2,TMEM245,GRK2,GRK5,MYH10,ASIC1,PRNP,TGFB2,STIL,POU2F1,ARHGEF37,CRIM1,DNAJC12,HMGA2,INHBB,KLHL23,ARHGAP24,SYT7,ARHGAP23,BMP4,IFT20,ISG20,GCLC,PROC,BAMBI,TAF4B,FGFR3,LRP11,MXD4,PNLIPRP1,HMGB2,HSPB1,CTDSPL2,RND3,NETO1,IFT57,CFAP45,HIST1H1C,HUNK,ETV1,OLIG1,IQCD,AXIN2,GPCPD1,KLF15,CKAP4,ETV6,CCNA2,CREB3,IRF1,ALDH1A1,CAMK2B,REP15,LAMA4,PALM3,ATP2C2,ADD3,THBS1,AURKB,PTHLH,ASB16,AGPAT4,ALDH1B1,GNG4,ATOH8,LRIG1,HES1,PDE6A,CHGA,PLA2G2F,GALNT5,RRM2,CADPS,PPP2R3A,MAPK15,SLC4A8,RSPH1,MLPH,FMNL2,PIK3IP1,VIM,SNTB1","129","226.7","Cluster 3","Foxa1","false","false","Cluster 4","Clustered","4.580676328502415","Clustered","10.857142857142858","ENSMUSG00000035451"
"1321","","",,,"","Rnf180","false","false","Cluster 4","Clustered","4.909090909090909","Unclustered","6.545454545454546","ENSMUSG00000021720"
"583","","",,,"Cluster 1","Fut2","false","false","Cluster 4","Clustered","5.5","Clustered","9.0","ENSMUSG00000055978"
"1217","","",,,"Cluster 2","Zfp697","false","false","Cluster 4","Clustered","5.5","Clustered","7.333333333333333","ENSMUSG00000050064"
"702","","",,,"","2010003K11Rik","false","false","Cluster 4","Clustered","4.761904761904762","Unclustered","5.7142857142857135","ENSMUSG00000042041"
"1930","","",,,"","Tmem184c","false","false","Cluster 5","Clustered","3.0","Unclustered","2.4000000000000004","ENSMUSG00000031617"
"1786","","",,,"","Fam185a","false","false","Cluster 5","Clustered","2.888888888888889","Unclustered","5.142857142857142","ENSMUSG00000047221"
"2153","Literature ChIP-seq,53;ARCHS4 Coexpression,211;Enrichr Queries,335;ReMap ChIP-seq,221;GTEx Coexpression,698","IFITM3,MDC1,GFI1,SLC35B1,LRR1,LDLRAD3,MRGPRE,LGALS3,PREX1,RINL,DPYSL2,RASSF5,MYC,NIPAL2,STMN1,MYB,LONP1,TNS4,CCDC92,IER3,GPR179,CUBN,MBNL1,UNC5A,SP110,DAPK1,DAPK2,SYTL1,CACNA2D2,TIAM1,KCNQ1,HOXB4,HOXB3,RIN3,ZG16,HOXB8,KCTD17,PIK3R5,TRPM2,CRACR2A,CRACR2B,INPP5D,GALR1,ADAMTS17,CEP192,KCNN4,RHBDL3,ST3GAL1,ST3GAL2,RAB11FIP4,NXNL2,LHPP,MYH7B,EGR2,CARMIL2,AFAP1L1,CARMIL3,CADM1,SLC35E4,NFATC2,NBEAL2,ABCA7,MANF,FOSL1,XKR7,UCK2,SDC1,RGL1,ITM2C,DENND1C,RET,ECM1,BTG2,TMEM151B,LRRC10B,GPR20,RCSD1,CX3CL1,LIMD2,LFNG,FAM102A,MMP24,KCNT1,SLC22A15,TMEM44,MMP28,PLEKHN1,TK1,EMB,CD53,PSD,APOBEC2,ACTL6B,SERPINB9,NME4,KIF22,WNT9A,SYP,CBFA2T3,RENBP,VAV1,PARP8,APBB1IP,RAD51B,RIPPLY3,TUBB2A,CLDN14,KIT,KCNMA1,ADSSL1,SLC29A4,KIF2C,PLEKHO1,RHOV,HCST,PLCB2,VAMP2,SDCCAG8,PHLPP1,PKN3,SLC43A3,FAM129A,ADCY1,TMEM163,RAD54B,NT5E,ALOX5,P4HTM,LY6G6F,GABBR2,SUSD1,GPR55,LAPTM5,BMP8A,RFLNB,LHFPL5,RPA1,LHFPL4,LHFPL2,KRT10,FMO5,GCK,GRIN1,ALDH4A1,CYP2W1,CENPI,NFIB,KLHL7,KLHL8,YPEL1,FOSB,RAMP1,YPEL3,NRROS,CD83,ANKRD35,RORA,NR3C1,GIMAP6,ETS1,GIMAP8,IGF1R,SYDE2,RGS2,IL18RAP,CCND1,ARHGAP40,BASP1,CCRL2,CAPN2,TNFRSF8,PIM2,PLXNC1,TGM2,ZBP1,KCNH2,RNF43,MREG,IGFBP4,ANKRD44,ZBTB38,IGFBP3,DIO1,ARID5B,MITF,VRK2,CDC25C,TLE6,MPEG1,ADAM19,DCTD,VMAC,MFNG,S100A6,CARD11,EMID1,NOTCH2,SEMA7A,BRSK2,AKNA,NOTCH1,CTTNBP2,HVCN1,TCF7,HPCA,ARHGAP19,GMPR,ITPR2,CACNA1C,PKMYT1,ZFP36L2,BCL2L11,GRK2,HRH3,PGK1,MDN1,PRNP,SDF2L1,DENND4B,ATP8B2,OSBPL5,RBPMS,HMGA1,ZBTB10,HMGA2,ISG15,ISG20,CXCL10,PTPRE,CDK6,RGCC,DLG4,RCAN3,ALPL,CNIH2,MAP3K14,TNFAIP8,DOCK8,PDE3B,ATP2A3,HSPB1,CELF5,YBX2,ZC3H6,ITGAL,PIK3CG,LMNB1,SPN,PIDD1,PSTPIP1,DUSP10,LBH,ADGRE5,ITGB7,HGFAC,SMIM14,TRPC7,TRIM62,EGFL7,CAMK1D,DST,ITGA4,TNFRSF19,SH2D3C,PLAUR,PPP2R5B,TBC1D8,AXIN2,IQCD,GIP,DUSP22,FGR,RBL1,VGF,RASA3,TMBIM4,GFOD1,IRF1,MCM4,GNB1L,ITGA5,MTFR2,DOCK2,NEMP1,ITGA9,MCM2,HEMGN,LTK,RGS14,GLS2,RGS16,CCDC69,SEMA3G,NLRC3,CXXC5,THBS1,NSL1,AURKB,ABLIM1,SV2C,SH3BP1,SPOCK2,ATOH8,LRIG1,MAN1C1,NRIP3,HES1,LINGO3,SGTB,QPCTL,PLCL1,ARID3A,FBXL16,KLF4,SORL1,ADGRD1,MAPK11,FMNL1,FAM167A,FMNL2,PIK3IP1,IMPDH2,ALOX5AP,SPAG1,ACKR3,RGS12,VIM,SSBP2,CBLN3,CD244,SLC25A35","213","303.6","Cluster 2","Tcf7","false","false","Cluster 5","Clustered","2.5373737373737373","Clustered","8.018181818181818","ENSMUSG00000000782"
"2148","","",,,"","Ube2c","false","false","Cluster 5","Clustered","3.0476190476190474","Unclustered","2.4444444444444446","ENSMUSG00000001403"
"2082","","",,,"","Slc35b1","false","false","Cluster 5","Clustered","2.5555555555555554","Unclustered","2.311111111111111","ENSMUSG00000020873"
"304","","",,,"","Nkx2-2","false","false","Cluster 5","Clustered","2.6645161290322577","Unclustered","2.6645161290322577","ENSMUSG00000027434"
"1775","ARCHS4 Coexpression,908;Enrichr Queries,381;GTEx Coexpression,232","IFITM3,FAM89A,ETS1,CLDN1,TMEM263,ELK3,LGALS3,SLC25A48,RGS2,RPS6KA6,CCND1,CDH2,DPYSL2,MYC,LIPH,GJA4,CREB3L2,DPYSL3,TGM2,IER3,EPHA4,POSTN,CD93,IL1R1,IGFBP4,IGFBP3,IGFBP2,P3H3,SLC51A,PROCR,LMX1A,MYL9,NUMBL,SDC4,NPR1,NOTCH4,GPR85,LPL,SLC1A3,CACNA1A,APCDD1,FBLN2,NEUROD2,CALHM2,SCUBE1,PODXL,STC2,IGFBP7,RAI2,WNT3,PRNP,EGR2,TGFB2,AFAP1L1,CADM1,CAV2,ARHGAP29,INHBB,POU2F3,DCLK1,GADD45G,FOSL1,BMP4,CXCL10,BAMBI,ID4,FGFR3,ITM2C,CDKN1C,NRP1,COL18A1,TRIM72,BTG2,HSPB8,PTPRM,HSPB1,CELF5,RND3,C1QTNF1,MECOM,ANXA6,TIMP3,PLEKHG1,EGFL7,ARHGEF15,NAV1,SLC35G2,PAX6,RCN1,KIF9,RASA3,ASPH,MDFIC,IRF1,PLSCR4,GAS6,DBN1,PKN3,SEMA3G,FAM129A,THBS1,AURKB,NCALD,RHD,DLL4,NT5E,PDE11A,RASD1,SRPX2,CHSY1,CAMK2N1,LRIG1,HES1,SLIT2,GSN,TPBG,GPR4,ARID3A,KLF4,BCL6B,CACHD1,ACKR3,FOSB,VIM,CDO1","516","507.0","Cluster 1","Msx1","false","false","Cluster 5","Clustered","3.0888066604995377","Clustered","10.0","ENSMUSG00000048450"
"1372","ARCHS4 Coexpression,23;Enrichr Queries,78;GTEx Coexpression,411","FOXA1,RAB3B,RAB3C,TUSC3,ETS1,RGS4,SCGN,CAPN8,RGS2,MCIDAS,VSIG1,CCND1,CDH2,CREB3L4,KIF5C,BASP1,CREB3L1,DPYSL2,CHEK2,RASSF6,DPYSL3,MYB,CHGB,EPHA4,EPHA7,CASR,TRIQK,KCNH6,ENTPD3,IGFBP3,IGFBP2,ANXA10,KCNK16,TM4SF4,VWA5B2,EML1,OLFM1,EML5,PLPP5,SELENOM,SMO,RFX6,MAP1B,SCG5,HOXB3,SCG3,KCTD12,SCG2,STX1A,BEX2,KHDRBS3,GIPR,GPR119,SLC41A2,ARX,CACNA1A,SLC38A11,NEUROD1,NPTX2,TAC1,RAI2,NKX2-2,EGR2,TGFB2,FER1L4,SYT1,CADM1,BDNF,ST8SIA3,SLC16A12,DNAJC12,SSC5D,ESRRG,SYT7,ST18,GADD45G,BMP4,CXCL10,PLCXD3,BAMBI,PKIA,FXYD2,RCAN2,FEV,RCAN3,ID4,CPE,PAM,ITM2C,LRP11,CDKN1C,SNAP25,NRP1,PCSK1,BTG2,PSCA,PTPRN,PDE3B,ICA1,RND3,MECOM,UCN3,DNER,TIMP3,NEFM,FFAR1,TMED6,CGNL1,TMED8,EDN3,GPX3,ABCC8,NME4,ETV1,GFRA1,PAX6,SLC35G2,PROX1,SSTR1,SYNGR4,SSTR3,DNAJC3,SETBP1,ALDH1A1,KIT,KCNMA1,TFF2,PDZRN3,DDC,CRYBA2,CRMP1,HOXD13,THBS1,CXXC4,AURKB,SLC7A2,GNAI1,MFSD4A,GNG4,CAMK2N1,LRIG1,SLITRK6,SPOCK1,MSX1,SLIT2,PAK3,SLC36A4,SPDEF,RUNX1T1,SEC11C,CHGA,GCH1,KCNB2,PCDH8,CADPS,SYT14,GCG,SYT13,MBOAT4,KLF4,POU4F1,DLK1,TTC39A,GCK,RFLNA,TTC8,FAM167A,MLPH,SST,NFIB,SGSM3,A4GNT,ETNK1,ASXL3,QPCT,CACHD1,RIMBP2,GHRL,VIM,INSM1,UNC79","78","170.7","Cluster 4","Isl1","false","false","Cluster 6","Clustered","5.333333333333333","Clustered","5.333333333333333","ENSMUSG00000042258"
"1131","ARCHS4 Coexpression,181;Enrichr Queries,236;GTEx Coexpression,350","GALNT12,FOXA1,FCGBP,SH2D7,CHPF,IRS1,GFI1,HTR4,SLC4A4,LGALS3,DPYSL2,MYC,CREB3L1,CHEK2,MYB,CHGB,SPINK4,EPHA4,EPHA7,KCNH6,IGFBP4,IGFBP3,OLFM4,MUC3A,ISL1,SDCBP2,ERN2,LMX1A,GPRIN1,LGALS12,SCNN1A,ZG16,LMX1B,SQSTM1,HTRA3,CACNA1A,FOXO6,TNFRSF11A,RAP1GAP,NEUROD1,TRPM2,SCIN,CRACR2B,NLRP6,CLCA1,TRPM5,TAC1,TSPAN1,EGR2,CADM1,ATP8B2,VDR,BDNF,REG4,HMGA1,ESRRG,SSC5D,B3GALT5,FBXO32,CORO2B,GADD45G,ARHGAP23,BMP4,PYY,CXCL10,FXYD3,ID4,FGFR3,CDKN1C,PCSK1,NRP1,BTG2,TFCP2L1,KRT20,MECOM,SH3PXD2A,BDKRB2,EMILIN1,GAL3ST2,APOBEC1,SLC13A1,LEFTY1,TPSG1,PEG3,URAD,PAX4,ETV1,GFRA1,PAX6,PROX1,WNT9A,B3GNT9,NR5A2,MEP1B,B3GNT6,KIT,TFF3,CDHR5,PDZRN3,DDC,REP15,HOXD13,ATP2C2,CXXC5,ASCL2,AURKB,RASD2,MUC2,GPR153,CAMK2N1,HSD17B2,AGR2,LRIG1,GCNT3,SPOCK1,MSX1,SLIT2,RUNX1T1,CHGA,R3HDML,CDKN2C,PCDH8,AHNAK2,GUCA2B,KLF4,POU4F1,GUCA2A,SMOC2,TMEM158,XPNPEP2,NFIB,FABP6,INSM1,TRIM31,LGR5,KCNK2,FRYL,NEUROG3","160","255.7","Cluster 4","Atoh1","false","false","Cluster 6","Clustered","5.978021978021978","Clustered","5.714285714285714","ENSMUSG00000073043"
"1593","","",,,"Cluster 1","Fam43a","false","false","Cluster 6","Clustered","5.647058823529412","Clustered","9.272727272727273","ENSMUSG00000046546"
"1792","ARCHS4 Coexpression,86;GTEx Coexpression,105","CNTFR,CHPF,STMN3,SOGA1,CELSR3,HID1,SAMD14,KIF5C,PALM,ADORA1,RBFOX3,IGFBP2,APLP1,SHISA4,MAPK8IP2,MYT1,MAPK8IP1,DISP2,CLIP3,TIAM1,ACAP3,GPR162,OLFM1,RAB37,MAP1A,BRSK1,BRSK2,NDRG4,ARHGEF25,STXBP1,CACNA1B,CACNA1A,NREP,CPLX2,CACNA1H,GOLGA7B,NEUROD1,IGSF21,NEUROD2,PDZD4,NPTX1,RAB6B,B4GALNT4,PACSIN1,PLK5,CARMIL3,CORO2B,MT3,ST18,SYT7,GNAO1,PKIB,XKR7,DLG4,CNIH2,MXD4,ITM2C,GPSM1,SNAP25,PTPRR,TMEM151B,KCNC1,RASGRF1,DIRAS2,HSPB1,UNC80,JPH4,MMP24,KCNT1,PCLO,SCRN1,SLC22A17,MCF2L,TRIM3,KIF1A,CTSF,TRIM67,APC2,RPS6KL1,PPP2R5B,ETV1,PAX6,FAM219A,GFRA1,NME4,SYP,KCNAB3,CBFA2T3,SYN1,GPRC5B,MAPRE3,VAMP2,CAMK2B,SMARCD3,LRP3,ADCY1,TMEM163,PHYHIP,SLC25A29,SV2A,APBB1,GABRD,PCDHGC4,KLHL3,TUBB4A,STXBP5L,ALDH4A1,MAPK11,RAB15,SYT11,TRIM37,CBLN3,UNC79","34","95.5","Cluster 1","Cxxc5","false","false","Cluster 6","Clustered","5.933333333333334","Clustered","8.461538461538462","ENSMUSG00000046668"
"203","","",,,"","#N/A","false","false","Cluster 7","Clustered","3.55","Unclustered","3.55","mmu-miR-101a-3p"
"210","","",,,"","#N/A","false","false","Cluster 7","Clustered","3.466666666666667","Unclustered","3.466666666666667","mmu-miR-7a-5p"
"1641","","",,,"","Pam","false","false","Cluster 7","Clustered","3.888888888888889","Unclustered","4.666666666666667","ENSMUSG00000026335"
"735","","",,,"","Cacna2d1","false","false","Cluster 7","Clustered","4.0","Unclustered","4.0","ENSMUSG00000040118"
"2197","ARCHS4 Coexpression,372;Enrichr Queries,79;ReMap ChIP-seq,52;GTEx Coexpression,823","EHF,CLDN1,SLC4A4,ELK3,LGALS3,SYNPR,MYC,DPYSL2,RASSF6,SPATA24,DPYSL3,TNS4,HABP2,FBXO9,HOXA4,EPHA4,EPHA7,SERPINF2,TM4SF4,CLDN6,RBP4,CLDN4,TFR2,CLDN9,MAP1B,LGALS12,HOXB4,HOXB3,CYP2E1,KCTD12,HOXB8,PADI1,SDC4,TSHZ2,ENDOD1,APCDD1,ADAMTS17,S100A13,HIVEP3,S100A14,PCK1,ZBTB7C,MYH7B,EGR2,GSDMA,CADM1,NEBL,SLC33A1,RAB39B,RASSF9,NR0B2,ST18,GADD45G,FOSL1,TPX2,ANLN,FXYD3,FXYD2,ID4,FAT4,ITM2C,CDKN1C,NRP1,NRP2,ECM1,BTG2,TENM4,MIA3,RCSD1,LFNG,C1QTNF1,MECOM,SH3PXD2A,TIMP3,CEP55,WARS,ACTL6B,ARG1,MYOF,GFRA1,PAX6,PROX1,IL17RE,F2,BACE2,NR5A2,CLDN14,KCNMA1,KIT,TFF3,TFF2,KIF2C,RHOV,PLCB1,GPRC5C,PDZRN3,VAMP2,CD63,AFP,PHYHIP,TMEM163,SLC7A2,CAMK2N1,HSD17B2,MPZL2,RUNX1T1,GSN,LAPTM5,GUCA2B,SORBS2,FMO5,GUCA2A,AGT,NFIB,QPCT,KRT15,CACHD1,LGR5,OTC,SEMA5A,KLB,STEAP3,GDA,IRS1,RORA,ETS1,SLC8A1,HID1,AMOT,IGF1R,CAPN8,RGS2,CCND1,CDH2,CAPN2,PLXNC1,PHLDA3,RNF43,G6PC,IGFBP4,IGFBP3,IGFBP2,DIO1,ARID5B,ADAM19,SCNN1A,S100A6,SCG5,SCG3,IGFALS,SCG2,CPB2,NOTCH1,GLIS3,CACNA1A,LPL,PKMYT1,FUT2,FUT4,ZFP36L2,GOLGA7B,TMEM245,PLXNA4,PRNP,TGFB2,AMBP,SYT1,BDNF,ESRRG,FBXO32,INHBC,MT3,REEP1,PTPRE,CXCL10,EFNA3,PLCXD3,PROC,BFSP1,CDK6,NR4A3,FGF14,GGCX,CPS1,BAMBI,CPE,PIWIL4,CELF2,LECT2,HSPB1,RND3,SYNE1,NADK2,SDR16C5,GAL3ST2,HGFAC,DST,PEG3,LIX1L,URAD,PLAUR,ETV1,NAV1,AXIN2,IQCD,SSTR1,PRODH2,RASA3,VGF,ASPH,SETBP1,IRF1,RBM20,ANG,GNB1L,AGXT,DDC,GLS2,RGS16,HSD17B13,ADD3,CXXC5,THBS1,AURKB,NCALD,ABLIM1,LRIG1,SLIT1,SLIT2,PCDH8,KLF4,SORL1,DHODH,RSPH1,FMNL1,NFASC,TRIM35,INSM1,SNTB1","241","331.5","","Prox1","false","false","","Unclustered","0.2857142857142857","Unclustered","0.2857142857142857","ENSMUSG00000010175"
"2196","ARCHS4 Coexpression,238;Enrichr Queries,312;GTEx Coexpression,504","IFITM3,NRROS,CD83,RORA,MKI67,ETS1,IFIT3,IFIT2,CDC20,LGALS3,RGS2,RINL,IL18RAP,CCND1,DPYSL2,MYC,RASSF5,MYB,TNFSF10,LONP1,PIEZO1,IER3,ZBP1,MBNL1,RSAD2,SP110,ANKRD44,ARID5B,MFNG,RIN3,CARD11,AKNA,TCF7,PLA2G7,FUT4,PIK3R5,TRPM2,GRK2,INPP5D,ST8SIA4,HIVEP3,EGR2,CARMIL2,DENND4B,NFATC2,RAB27A,ISG15,NBEAL2,ISG20,CXCL10,CDK6,NR4A3,FES,CALR,ITM2C,DENND1C,TOP2A,BTG2,SH3KBP1,DOCK8,ATP2A3,LRMP,ITGAL,RCSD1,PIK3CG,LIMD2,LMNB1,SPN,PSTPIP1,HHEX,ADGRE5,ITGB7,EMB,TOPBP1,POLE,CD53,ITGA4,PLAUR,CBFA2T3,VAV1,PARP8,FGR,APBB1IP,HCK,IRF1,KIT,IRF7,BIRC5,MCTP2,DOCK2,HCST,ST6GALNAC4,PLCB2,RGS16,FAM129A,NLRC3,THBS1,AURKB,FAM117A,TMEM71,SLC17A9,SH3BP1,POLD1,P2RY2,LRIG1,ATOH1,RRM2,GCH1,LAPTM5,ARID3A,KLF4,SORL1,FMNL1,ALOX5AP,FOSB,VIM,INSM1,CD244","267","351.3","","Gfi1","false","false","","Unclustered","0.6666666666666666","Unclustered","2.0","ENSMUSG00000029275"
"2195","","",,,"","Brca1","false","false","","Unclustered","0.9285714285714286","Unclustered","0.9285714285714286","ENSMUSG00000017146"
"2194","","",,,"Cluster 1","Rad51","false","false","","Unclustered","5.785714285714286","Clustered","9.0","ENSMUSG00000027323"
"2193","","",,,"Cluster 2","Brca2","false","false","","Unclustered","5.0","Clustered","7.0","ENSMUSG00000041147"
"2191","","",,,"","Ccna1","false","false","","Unclustered","0.0","Unclustered","0.0","ENSMUSG00000027793"
"2189","","",,,"Cluster 2","Isg20","false","false","","Unclustered","4.464285714285714","Clustered","7.0","ENSMUSG00000039236"
"2184","","",,,"","Cyp3a13","false","false","","Unclustered","4.761904761904762","Unclustered","7.0","ENSMUSG00000029727"
"2181","","",,,"","Calr","false","false","","Unclustered","3.0","Unclustered","2.4000000000000004","ENSMUSG00000003814"
"2180","","",,,"Cluster 2","Syt1","false","false","","Unclustered","3.888888888888889","Clustered","6.666666666666666","ENSMUSG00000035864"
"2176","","",,,"","Dll4","false","false","","Unclustered","0.0","Unclustered","0.0","ENSMUSG00000027314"
"2175","ARCHS4 Coexpression,1092;Enrichr Queries,329;GTEx Coexpression,262","CNTFR,STMN3,AQP4,RIMS4,CCND1,DPYSL2,MYC,CHEK2,PALM,DPYSL3,ADORA1,TNR,KIRREL2,IGFBP3,IGFBP2,ACSL6,RUNDC3A,DKK3,SCG3,NUPR1,NGEF,NOTCH2,BRSK1,BEX2,NOTCH1,GPR85,SLC1A3,CACNA1A,C2CD4C,APCDD1,DTX4,RAP1GAP,NEUROD2,MAP6,NPTX1,RHBDL3,NPTX2,B4GALNT4,ASIC1,EGR2,TGFB2,FZD3,BTBD17,MT3,GADD45G,GNAO1,CXCL10,GJB2,NR4A3,H2AFY2,DLG4,KLHDC8A,REEP2,PPP1R1B,ID4,CSPG5,CPE,ALPL,FGFR3,ITM2C,CDKN1C,BTG2,NCAN,GRIK3,CELF5,HSPB1,NRARP,LFNG,MAP1LC3A,TIMP3,KIF1A,APC2,PSD,PIANP,OLIG1,PAX6,NME4,IL17RD,ETV4,TUBB2A,MMP17,KIT,ARHGEF4,AGXT,FJX1,DBN1,PHLPP1,LENG9,SNX32,THBS1,AURKB,DLL3,NWD1,RASD1,CAMK2N1,LRIG1,RPRML,HES1,GABRA2,GDF11,PCDH8,KLF4,DLK1,ETNPPL,MAB21L3,CENPF,ABI2,MORN4,SYT11,SMOC1,FOSB,APBA1,VIM,INSM1","604","561.0","","Hes5","false","false","","Unclustered","0.6666666666666666","Unclustered","0.6666666666666666","ENSMUSG00000048001"
"2173","","",,,"","Ddb2","false","false","","Unclustered","2.0","Unclustered","3.0","ENSMUSG00000002109"
"2172","","",,,"Cluster 2","Cdc20","false","false","","Unclustered","5.9393939393939394","Clustered","8.2","ENSMUSG00000006398"
"2171","","",,,"Cluster 1","Pola1","false","false","","Unclustered","5.9818181818181815","Clustered","9.0","ENSMUSG00000006678"
"2168","","",,,"","Pcna","false","false","","Unclustered","1.6666666666666667","Unclustered","1.6666666666666667","ENSMUSG00000027342"
"2167","","",,,"Cluster 1","Map1lc3a","false","false","","Unclustered","7.644444444444445","Clustered","8.6","ENSMUSG00000027602"
"2165","","",,,"","Ccna2","false","false","","Unclustered","4.909090909090909","Unclustered","6.066666666666666","ENSMUSG00000027715"
"2163","","",,,"","Chek2","false","false","","Unclustered","3.4285714285714284","Unclustered","6.0","ENSMUSG00000029521"
"2160","","",,,"","Skp2","false","false","","Unclustered","0.6666666666666666","Unclustered","0.6666666666666666","ENSMUSG00000054115"
"2159","","",,,"","Tle2","false","false","","Unclustered","1.6666666666666667","Unclustered","1.6666666666666667","ENSMUSG00000034771"
"2156","Literature ChIP-seq,70;ARCHS4 Coexpression,62;Enrichr Queries,107;ReMap ChIP-seq,291;GTEx Coexpression,107","LRR1,SLC35B1,MRGPRE,SOGA1,ENO3,HS6ST2,IFIT2,SMC2,SAMD14,CREB3L4,DPYSL2,MYC,CHEK2,DPYSL3,MYB,RASSF6,CHGB,TMEM88B,EPHA4,TRIQK,RBFOX3,ENTPD3,CTRB1,KCNK16,TM4SF4,VWA5B2,ISL1,RNASE1,CLDN6,TIAM1,GPR162,NEIL3,RFX6,CLDN9,MAP1B,CLDN8,LGALS12,HOXB4,HOXB3,BEX2,RWDD2A,CDCA3,FICD,GIPR,STXBP1,ARX,SLC5A3,IQGAP3,TRPM2,CRACR2B,S100A13,NKX2-2,EGR2,PLK5,CARMIL3,DTNA,GSTM1,CADM1,STAC,TNFSF15,FZD7,ST8SIA3,EDEM2,SLC16A12,ABCA7,CDC6,ST18,MANF,FOSL1,PKIB,XKR7,MOV10,GJB2,ARTN,FXYD2,ID4,PAM,CDKN1C,NRP1,PCSK1,PTPRR,BTG2,NRP2,TMEM151B,KCNC1,TENM4,PTPRN,DIRAS2,TUBA1B,MMP24,KCNT1,PCLO,TUBA1A,MECOM,UCN3,TRIM3,DNER,NUF2,TIMP3,GAST,NEFM,FFAR1,HELLS,ACTL6B,EDN3,MYOF,GFRA1,SLC35G2,PAX6,PROX1,RHOC,F2,IL17RD,CNKSR2,NR5A2,ANGPTL6,MMP15,KIT,KCNMA1,KIF2C,DBN1,OPRD1,SEZ6,HOXD13,SLC7A2,CAMK2N1,TCEAL1,APBB1,MSX1,PAK3,MBNL3,GABRD,P4HTM,RUNX1T1,EGLN1,GCH1,KCNB2,SYVN1,KLHL3,GCG,TUBB4A,POU4F1,GCK,STXBP5L,SPSB2,TTC8,NFIB,CENPI,KRT15,ETNK1,QPCT,KLHL7,RIMBP2,CENPN,TRIP13,YPEL3,FOXA1,RAB3B,RAB3C,TPSB2,RASL11B,TUSC3,ZWILCH,RORA,NR3C1,ETS1,ALDH1L2,CELSR3,SLC8A1,IGF1R,RGS4,SCGN,RGS2,CCND1,CDH2,KIF5C,CAPN2,GRB10,TGM2,PHLDA3,TOR3A,TLE2,CASR,KIRREL2,IGFBP3,ZBTB38,ARID5B,MITF,MYT1,DISP2,PLA2G15,ARMCX3,ACAP3,OLFM1,SLC9A5,RAB37,DKC1,SLC9A9,ARMCX6,SCG5,SCG3,IGFALS,SQSTM1,SCG2,BRSK1,BRSK2,NDRG4,NOTCH1,KHDRBS3,GPR119,SLC41A2,CACNA1B,CACNA1A,SLC1A3,NREP,CPLX2,ZFP36L2,CNN3,GOLGA7B,NEUROD1,IGSF21,NEUROD2,BAG2,HRH3,NPTX1,NXPH1,ECT2,PACSIN1,PRNP,TGFB2,STIL,CBX5,POU2F1,HSPA5,SYT1,BDNF,ARHGEF39,HMGA1,HMGA2,DNAJC12,INHBB,ESRRG,FANCB,SYT7,ARHGAP24,BMP4,MFHAS1,PLCXD3,CDK6,GGCX,DLG4,LHX1,REEP2,CPE,CNIH2,FGFR3,LRP11,SNAP25,RASGRF1,LECT2,SYNE4,SYNE1,UNC80,SPRED3,PIDD1,LBH,SCRN1,MCF2L,GDAP1L1,CNGA4,A4GALT,TRIM67,HIST1H1C,GPX3,ABCC8,PPP2R5B,HAUS4,GPX7,ETV1,NAV1,SSTR1,KCNAB3,GPCPD1,SYNGR4,SSTR3,DNAJC3,RCN1,ALDH1A1,TRIM59,MCM5,SPACA6,AGXT,ASPA,CAMK2B,RGS17,RGS13,CRMP1,SLC5A10,MLLT3,THBS1,CXXC4,AURKB,ABLIM1,SLC25A29,GNG2,SV2A,GNG4,SPOCK2,NT5DC2,LRIG1,SPOCK1,SLIT2,SLC36A4,SEC11C,PCDHGC4,SPAG4,PCDH8,CADPS,SYT14,FBXL16,SYT13,MBOAT4,KLF4,DLK1,TTC39A,NFASC,FAM167A,MLPH,SYT11,IMPDH2,ASXL3,SPAG1,VIM,INSM1,CBLN3,UNC79","54","127.4","","Pax6","false","false","","Unclustered","3.1764705882352944","Unclustered","3.1764705882352944","ENSMUSG00000027168"
"2152","","",,,"Cluster 1","Axin2","false","false","","Unclustered","6.0","Clustered","9.0","ENSMUSG00000000142"
"2151","ARCHS4 Coexpression,162;Enrichr Queries,290;GTEx Coexpression,271","IFITM3,GALNT18,AQP7,GIMAP6,ETS1,GIMAP8,ELK3,CCND1,DPYSL2,MYC,GJA4,DPYSL3,TNFSF10,GRB10,TGM2,IER3,POSTN,CD93,RSAD2,IL1R1,IGFBP4,IGFBP3,VASH1,HSPG2,PROCR,IFI27,SLCO2A1,S100A6,COL8A1,KCTD12,MYL9,NOTCH3,CALCRL,NPR1,NOTCH4,HTRA3,LPL,STC1,FBLN2,SLC9A3R2,GRK5,PODXL,FAM43A,IGFBP7,EGR2,AFAP1L1,CAV2,CRIM1,ARHGAP29,INHBB,BMX,GADD45G,CXCL10,RGCC,NR4A3,ALPL,XAF1,FERMT2,ACVRL1,NRP1,COL18A1,NRP2,TNFAIP2,PTPRM,HSPB1,NRARP,CX3CL1,HHEX,TMEM44,TIMP3,CGNL1,PLEKHG1,EGFL7,WARS,ARHGEF15,GPX3,SH2D3C,PLAUR,RHOC,SHROOM4,BACE2,ADGRF5,KIT,PLSCR4,PECAM1,ITGA5,ITGA9,PKN3,LAMA4,RGS16,SEMA3G,NTN4,PKD1L1,THBS1,AURKB,DLL4,LRIG1,ANGPT2,GPR4,FMO2,KLF4,LYVE1,MAPK11,NFIB,ACKR3,FOSB,TEK,VIM","149","241.0","","Bcl6b","false","false","","Unclustered","5.0","Unclustered","6.0","ENSMUSG00000000317"
"2147","","",,,"Cluster 2","Mov10","false","false","","Unclustered","4.761904761904762","Clustered","8.0","ENSMUSG00000002227"
"2139","","",,,"Cluster 1","Tbc1d8","false","false","","Unclustered","6.236363636363636","Clustered","10.0","ENSMUSG00000003134"
"2138","","",,,"Cluster 1","Car11","false","false","","Unclustered","6.0","Clustered","9.0","ENSMUSG00000003273"
"2130","","",,,"Cluster 1","Rcn1","false","false","","Unclustered","5.564102564102564","Clustered","10.0","ENSMUSG00000005973"
"2129","","",,,"Cluster 2","Pdk1","false","false","","Unclustered","5.823529411764706","Clustered","7.583333333333333","ENSMUSG00000006494"
"2128","","",,,"Cluster 2","Gmnn","false","false","","Unclustered","5.653846153846154","Clustered","7.636363636363637","ENSMUSG00000006715"
"2126","","",,,"Cluster 2","Stx1a","false","false","","Unclustered","6.236363636363636","Clustered","6.666666666666667","ENSMUSG00000007207"
"2125","","",,,"Cluster 1","Ankrd26","false","false","","Unclustered","5.0","Clustered","9.0","ENSMUSG00000007827"
"2123","","",,,"Cluster 2","Cbx5","false","false","","Unclustered","5.5","Clustered","7.333333333333333","ENSMUSG00000009575"
"2117","","",,,"","Ncapg","false","false","","Unclustered","2.7","Unclustered","3.6","ENSMUSG00000015880"
"2115","","",,,"Cluster 2","Gast","false","false","","Unclustered","6.377777777777777","Clustered","8.2","ENSMUSG00000017165"
"2111","","",,,"Cluster 2","Atad5","false","false","","Unclustered","5.066666666666666","Clustered","8.2","ENSMUSG00000017550"
"2109","","",,,"Cluster 1","Anxa6","false","false","","Unclustered","5.5","Clustered","9.0","ENSMUSG00000018340"
"2101","","",,,"","Wasf1","false","false","","Unclustered","4.027777777777778","Unclustered","5.142857142857142","ENSMUSG00000019831"
"2092","","",,,"","Prr11","false","false","","Unclustered","2.4000000000000004","Unclustered","2.4000000000000004","ENSMUSG00000020493"
"2084","","",,,"Cluster 2","Mxra7","false","false","","Unclustered","6.0","Clustered","7.0","ENSMUSG00000020814"
"2079","","",,,"Cluster 1","Top2a","false","false","","Unclustered","5.5","Clustered","9.0","ENSMUSG00000020914"
"2078","","",,,"Cluster 2","Vrk1","false","false","","Unclustered","4.783333333333333","Clustered","7.8545454545454545","ENSMUSG00000021115"
"2076","","",,,"Cluster 2","Papln","false","false","","Unclustered","6.0","Clustered","7.0","ENSMUSG00000021223"
"2072","","",,,"Cluster 2","Emb","false","false","","Unclustered","4.0","Clustered","7.0","ENSMUSG00000021728"
"2071","","",,,"Cluster 2","Dnajc9","false","false","","Unclustered","5.0","Clustered","7.0","ENSMUSG00000021811"
"2067","","",,,"","Dpysl2","false","false","","Unclustered","0.4","Unclustered","0.4","ENSMUSG00000022048"
"2058","","",,,"Cluster 1","Mapk8ip2","false","false","","Unclustered","5.785714285714286","Clustered","9.0","ENSMUSG00000022619"
"2057","","",,,"Cluster 1","Mcm4","false","false","","Unclustered","5.785714285714286","Clustered","9.0","ENSMUSG00000022673"
"2047","","",,,"Cluster 2","Racgap1","false","false","","Unclustered","6.377777777777777","Clustered","6.836363636363636","ENSMUSG00000023015"
"2046","","",,,"Cluster 2","Asic1","false","false","","Unclustered","8.0","Clustered","8.181818181818182","ENSMUSG00000023017"
"2044","","",,,"Cluster 1","Serping1","false","false","","Unclustered","5.3076923076923075","Clustered","10.0","ENSMUSG00000023224"
"2043","","",,,"","Scg5","false","false","","Unclustered","3.7333333333333334","Unclustered","4.666666666666667","ENSMUSG00000023236"
"2029","","",,,"Cluster 1","Ankrd22","false","false","","Unclustered","5.9393939393939394","Clustered","10.0","ENSMUSG00000024774"
"2026","","",,,"Cluster 1","Grk2","false","false","","Unclustered","6.0","Clustered","9.0","ENSMUSG00000024858"
"2024","","",,,"Cluster 2","Gpam","false","false","","Unclustered","6.3238095238095235","Clustered","7.904761904761904","ENSMUSG00000024978"
"2018","","",,,"Cluster 2","Gdf11","false","false","","Unclustered","4.464285714285714","Clustered","7.0","ENSMUSG00000025352"
"2017","","",,,"Cluster 1","Rbfox3","false","false","","Unclustered","5.785714285714286","Clustered","9.0","ENSMUSG00000025576"
"2013","","",,,"Cluster 1","Bard1","false","false","","Unclustered","5.5","Clustered","9.0","ENSMUSG00000026196"
"2003","","",,,"","Mastl","false","false","","Unclustered","1.6666666666666667","Unclustered","3.0","ENSMUSG00000026779"
"1994","","",,,"","Wdr76","false","false","","Unclustered","1.4","Unclustered","1.4","ENSMUSG00000027242"
"1993","","",,,"","F2","false","false","","Unclustered","3.7333333333333334","Unclustered","4.666666666666667","ENSMUSG00000027249"
"1990","","",,,"Cluster 1","Tpx2","false","false","","Unclustered","5.785714285714286","Clustered","9.0","ENSMUSG00000027469"
"1989","","",,,"Cluster 2","Pck1","false","false","","Unclustered","5.2","Clustered","7.333333333333333","ENSMUSG00000027513"
"1984","","",,,"","Exosc8","false","false","","Unclustered","4.0","Unclustered","5.0","ENSMUSG00000027752"
"1983","","",,,"Cluster 1","Mbnl1","false","false","","Unclustered","6.0","Clustered","9.0","ENSMUSG00000027763"
"1975","","",,,"Cluster 1","Fam219a","false","false","","Unclustered","6.0","Clustered","9.0","ENSMUSG00000028439"
"1973","","",,,"Cluster 2","Laptm5","false","false","","Unclustered","5.785714285714286","Clustered","6.75","ENSMUSG00000028581"
"1968","","",,,"Cluster 2","P3h1","false","false","","Unclustered","3.7333333333333334","Clustered","7.0","ENSMUSG00000028641"
"1967","","",,,"","Kif2c","false","false","","Unclustered","6.0","Unclustered","6.0","ENSMUSG00000028678"
"1965","","",,,"","Rad54l","false","false","","Unclustered","3.4285714285714284","Unclustered","5.0","ENSMUSG00000028702"
"1954","","",,,"Cluster 2","Kntc1","false","false","","Unclustered","4.464285714285714","Clustered","7.0","ENSMUSG00000029414"
"1951","","",,,"","Iqcd","false","false","","Unclustered","1.4","Unclustered","2.5","ENSMUSG00000029601"
"1950","","",,,"Cluster 2","Cyp3a25","false","false","","Unclustered","3.7333333333333334","Clustered","7.0","ENSMUSG00000029630"
"1948","","",,,"Cluster 2","4921507P07Rik","false","false","","Unclustered","5.5","Clustered","7.619047619047619","ENSMUSG00000029828"
"1940","","",,,"Cluster 2","Rad51ap1","false","false","","Unclustered","4.761904761904762","Clustered","7.0","ENSMUSG00000030346"
"1939","","",,,"","Qpctl","false","false","","Unclustered","3.7333333333333334","Unclustered","3.238095238095238","ENSMUSG00000030407"
"1938","","",,,"Cluster 1","Blm","false","false","","Unclustered","5.066666666666666","Clustered","9.0","ENSMUSG00000030528"
"1937","","",,,"","Rab30","false","false","","Unclustered","2.1999999999999997","Unclustered","1.8571428571428572","ENSMUSG00000030643"
"1936","","",,,"","Pde3b","false","false","","Unclustered","2.4000000000000004","Unclustered","2.4000000000000004","ENSMUSG00000030671"
"1935","","",,,"Cluster 2","Itgal","false","false","","Unclustered","3.7333333333333334","Clustered","7.0","ENSMUSG00000030830"
"1934","","",,,"Cluster 3","Mki67","false","false","","Unclustered","8.307692307692308","Clustered","11.076923076923077","ENSMUSG00000031004"
"1933","","",,,"","Slc9a9","false","false","","Unclustered","4.0","Unclustered","5.0","ENSMUSG00000031129"
"1927","","",,,"","Cdh16","false","false","","Unclustered","0.6666666666666666","Unclustered","0.6666666666666666","ENSMUSG00000031881"
"1924","","",,,"Cluster 2","Rab27a","false","false","","Unclustered","6.236363636363636","Clustered","8.2","ENSMUSG00000032202"
"1923","","",,,"Cluster 2","Ccnb2","false","false","","Unclustered","4.0","Clustered","7.0","ENSMUSG00000032218"
"1922","","",,,"Cluster 2","Gcnt3","false","false","","Unclustered","7.644444444444445","Clustered","7.7727272727272725","ENSMUSG00000032226"
"1920","","",,,"Cluster 1","Pstpip1","false","false","","Unclustered","6.0","Clustered","9.0","ENSMUSG00000032322"
"1919","","",,,"Cluster 2","Mb21d1","false","false","","Unclustered","4.464285714285714","Clustered","7.0","ENSMUSG00000032344"
"1917","","",,,"","Tmed3","false","false","","Unclustered","4.523809523809524","Unclustered","5.428571428571429","ENSMUSG00000032353"
"1914","","",,,"","Topbp1","false","false","","Unclustered","4.0","Unclustered","4.0","ENSMUSG00000032555"
"1911","","",,,"","Trpa1","false","false","","Unclustered","6.0","Unclustered","6.5","ENSMUSG00000032769"
"1910","","",,,"","Mctp2","false","false","","Unclustered","4.761904761904762","Unclustered","5.7142857142857135","ENSMUSG00000032776"
"1907","","",,,"Cluster 1","Hspa13","false","false","","Unclustered","5.621212121212121","Clustered","9.0","ENSMUSG00000032932"
"1905","","",,,"Cluster 1","Slc22a15","false","false","","Unclustered","8.672727272727272","Clustered","9.636363636363637","ENSMUSG00000033147"
"1902","","",,,"","Zdhhc15","false","false","","Unclustered","1.6666666666666667","Unclustered","3.0","ENSMUSG00000033906"
"1901","","",,,"","Gde1","false","false","","Unclustered","5.5","Unclustered","6.416666666666666","ENSMUSG00000033917"
"1900","","",,,"Cluster 1","Aspm","false","false","","Unclustered","8.0","Clustered","9.0","ENSMUSG00000033952"
"1898","","",,,"Cluster 1","Emid1","false","false","","Unclustered","5.5","Clustered","9.0","ENSMUSG00000034164"
"1897","","",,,"","Rnf43","false","false","","Unclustered","5.0","Unclustered","6.0","ENSMUSG00000034177"
"1896","","",,,"Cluster 2","Rhov","false","false","","Unclustered","6.0","Clustered","8.0","ENSMUSG00000034226"
"1892","","",,,"Cluster 1","Tle6","false","false","","Unclustered","4.464285714285714","Clustered","9.0","ENSMUSG00000034758"
"1891","","",,,"","Nrip3","false","false","","Unclustered","5.0","Unclustered","6.0","ENSMUSG00000034825"
"1887","","",,,"Cluster 2","Fignl1","false","false","","Unclustered","5.9393939393939394","Clustered","8.018181818181818","ENSMUSG00000035455"
"1885","","",,,"","Abca7","false","false","","Unclustered","2.7","Unclustered","5.0","ENSMUSG00000035722"
"1884","","",,,"","Ids","false","false","","Unclustered","4.464285714285714","Unclustered","6.25","ENSMUSG00000035847"
"1882","","",,,"Cluster 2","Fam122b","false","false","","Unclustered","7.0","Clustered","6.933333333333334","ENSMUSG00000036022"
"1879","","",,,"Cluster 4","Lzts1","false","false","","Unclustered","6.377777777777777","Clustered","5.714285714285714","ENSMUSG00000036306"
"1878","","",,,"","Rmdn2","false","false","","Unclustered","5.785714285714286","Unclustered","6.222222222222221","ENSMUSG00000036368"
"1875","","",,,"Cluster 2","Dna2","false","false","","Unclustered","5.785714285714286","Clustered","7.0","ENSMUSG00000036875"
"1874","","",,,"Cluster 1","Xpnpep2","false","false","","Unclustered","5.5","Clustered","9.0","ENSMUSG00000037005"
"1870","","",,,"Cluster 1","Vgf","false","false","","Unclustered","6.236363636363636","Clustered","8.4","ENSMUSG00000037428"
"1867","","",,,"Cluster 1","Osbpl5","false","false","","Unclustered","6.236363636363636","Clustered","8.4","ENSMUSG00000037606"
"1863","","",,,"Cluster 2","Rtkn2","false","false","","Unclustered","5.0","Clustered","7.0","ENSMUSG00000037846"
"1856","","",,,"Cluster 2","Ankrd35","false","false","","Unclustered","5.0","Clustered","7.0","ENSMUSG00000038354"
"1855","","",,,"Cluster 1","Ttk","false","false","","Unclustered","5.564102564102564","Clustered","10.0","ENSMUSG00000038379"
"1854","","",,,"","Tmco3","false","false","","Unclustered","0.0","Unclustered","0.0","ENSMUSG00000038497"
"1852","","",,,"","Pold1","false","false","","Unclustered","3.142857142857143","Unclustered","5.142857142857142","ENSMUSG00000038644"
"1851","","",,,"Cluster 1","Agbl3","false","false","","Unclustered","4.384615384615384","Clustered","9.0","ENSMUSG00000038836"
"1849","","",,,"Cluster 1","Hrh3","false","false","","Unclustered","7.644444444444445","Clustered","8.6","ENSMUSG00000039059"
"1843","","",,,"Cluster 1","Dap","false","false","","Unclustered","6.171428571428572","Clustered","8.787878787878787","ENSMUSG00000039168"
"1839","","",,,"Cluster 2","Tusc3","false","false","","Unclustered","6.0","Clustered","7.0","ENSMUSG00000039530"
"1836","","",,,"Cluster 1","Galnt12","false","false","","Unclustered","6.0","Clustered","9.0","ENSMUSG00000039774"
"1833","","",,,"Cluster 1","Plcb2","false","false","","Unclustered","5.3076923076923075","Clustered","9.0","ENSMUSG00000040061"
"1832","","",,,"Cluster 2","Bub1b","false","false","","Unclustered","5.9818181818181815","Clustered","7.333333333333333","ENSMUSG00000040084"
"1831","","",,,"Cluster 2","Zfp704","false","false","","Unclustered","8.0","Clustered","8.181818181818182","ENSMUSG00000040209"
"1827","","",,,"Cluster 1","Xaf1","false","false","","Unclustered","6.377777777777777","Clustered","9.0","ENSMUSG00000040483"
"1826","","",,,"Cluster 2","Chrm4","false","false","","Unclustered","6.236363636363636","Clustered","7.5","ENSMUSG00000040495"
"1823","","",,,"","Dlk1","false","false","","Unclustered","6.0","Unclustered","5.571428571428571","ENSMUSG00000040856"
"1818","","",,,"Cluster 2","Ccdc8","false","false","","Unclustered","5.2","Clustered","7.333333333333333","ENSMUSG00000041117"
"1817","","",,,"Cluster 1","Adgrf1","false","false","","Unclustered","5.066666666666666","Clustered","10.0","ENSMUSG00000041293"
"1815","","",,,"Cluster 1","Ncapg2","false","false","","Unclustered","5.333333333333333","Clustered","9.0","ENSMUSG00000042029"
"1814","","",,,"","Zfand4","false","false","","Unclustered","2.0","Unclustered","2.0","ENSMUSG00000042213"
"1811","","",,,"Cluster 2","Npl","false","false","","Unclustered","6.236363636363636","Clustered","7.5","ENSMUSG00000042684"
"1810","","",,,"Cluster 3","Upk3b","false","false","","Unclustered","7.822222222222222","Clustered","10.694444444444445","ENSMUSG00000042985"
"1808","","",,,"Cluster 1","Il17re","false","false","","Unclustered","7.644444444444445","Clustered","9.444444444444445","ENSMUSG00000043088"
"1803","","",,,"Cluster 2","Wfikkn2","false","false","","Unclustered","8.0","Clustered","7.7727272727272725","ENSMUSG00000044177"
"1802","","",,,"","Cdc25c","false","false","","Unclustered","1.4","Unclustered","2.5","ENSMUSG00000044201"
"1801","","",,,"Cluster 2","Slc25a53","false","false","","Unclustered","5.5","Clustered","7.333333333333333","ENSMUSG00000044348"
"1800","","",,,"","Dact1","false","false","","Unclustered","4.761904761904762","Unclustered","5.7142857142857135","ENSMUSG00000044548"
"1799","","",,,"","Fbxo48","false","false","","Unclustered","2.0","Unclustered","2.0","ENSMUSG00000044966"
"1798","","",,,"Cluster 2","AI467606","false","false","","Unclustered","6.1090909090909085","Clustered","7.8545454545454545","ENSMUSG00000045165"
"1797","","",,,"","Sh2d5","false","false","","Unclustered","5.2","Unclustered","5.6000000000000005","ENSMUSG00000045349"
"1794","","",,,"Cluster 2","Camk2n1","false","false","","Unclustered","6.171428571428572","Clustered","7.714285714285714","ENSMUSG00000046447"
"1793","","",,,"Cluster 1","Ticrr","false","false","","Unclustered","6.1090909090909085","Clustered","9.0","ENSMUSG00000046591"
"1787","","",,,"","Dusp18","false","false","","Unclustered","5.571428571428571","Unclustered","6.027777777777779","ENSMUSG00000047205"
"1785","","",,,"Cluster 1","Cldn4","false","false","","Unclustered","7.644444444444445","Clustered","9.09090909090909","ENSMUSG00000047501"
"1784","","",,,"Cluster 1","Baiap3","false","false","","Unclustered","8.0","Clustered","9.0","ENSMUSG00000047507"
"1782","","",,,"","D930020B18Rik","false","false","","Unclustered","3.7333333333333334","Unclustered","4.333333333333334","ENSMUSG00000047642"
"1781","","",,,"","Fancb","false","false","","Unclustered","3.0","Unclustered","2.0","ENSMUSG00000047757"
"1780","","",,,"Cluster 1","Diras2","false","false","","Unclustered","6.0","Clustered","9.0","ENSMUSG00000047842"
"1779","","",,,"Cluster 2","Gimap6","false","false","","Unclustered","4.761904761904762","Clustered","7.0","ENSMUSG00000047867"
"1774","","",,,"Cluster 2","Sult6b2","false","false","","Unclustered","5.785714285714286","Clustered","8.0","ENSMUSG00000048473"
"1773","","",,,"Cluster 1","P2ry6","false","false","","Unclustered","5.785714285714286","Clustered","9.0","ENSMUSG00000048779"
"1770","","",,,"","Zg16","false","false","","Unclustered","5.785714285714286","Unclustered","6.222222222222221","ENSMUSG00000049350"
"1769","","",,,"Cluster 1","Rasd1","false","false","","Unclustered","7.5636363636363635","Clustered","9.454545454545455","ENSMUSG00000049892"
"1767","","",,,"","Tdrp","false","false","","Unclustered","5.0","Unclustered","6.0","ENSMUSG00000050052"
"1766","","",,,"Cluster 2","Sarm1","false","false","","Unclustered","4.761904761904762","Clustered","7.0","ENSMUSG00000050132"
"1764","","",,,"Cluster 2","Carmil2","false","false","","Unclustered","6.0","Clustered","7.0","ENSMUSG00000050357"
"1763","","",,,"Cluster 1","Ercc6l","false","false","","Unclustered","5.833333333333334","Clustered","10.0","ENSMUSG00000051220"
"1762","","",,,"","Zgrf1","false","false","","Unclustered","0.6666666666666666","Unclustered","0.6666666666666666","ENSMUSG00000051278"
"1753","","",,,"Cluster 1","Mapk11","false","false","","Unclustered","6.0","Clustered","9.0","ENSMUSG00000053137"
"1750","","",,,"Cluster 2","Ggcx","false","false","","Unclustered","5.2","Clustered","7.333333333333333","ENSMUSG00000053460"
"1741","","",,,"Cluster 1","Tmem245","false","false","","Unclustered","5.2","Clustered","9.0","ENSMUSG00000055296"
"1738","","",,,"Cluster 1","Fam105a","false","false","","Unclustered","5.8545454545454545","Clustered","9.0","ENSMUSG00000056069"
"1737","","",,,"","Snx32","false","false","","Unclustered","6.377777777777777","Unclustered","6.303030303030303","ENSMUSG00000056185"
"1732","","",,,"Cluster 2","Cep170","false","false","","Unclustered","4.285714285714286","Clustered","7.0","ENSMUSG00000057335"
"1730","","",,,"Cluster 2","Gstm1","false","false","","Unclustered","5.5","Clustered","7.333333333333333","ENSMUSG00000058135"
"1728","","",,,"Cluster 2","Espl1","false","false","","Unclustered","6.236363636363636","Clustered","8.2","ENSMUSG00000058290"
"1726","","",,,"Cluster 2","Kcnc1","false","false","","Unclustered","6.329670329670329","Clustered","7.1208791208791204","ENSMUSG00000058975"
"1724","","",,,"","Slc14a1","false","false","","Unclustered","4.761904761904762","Unclustered","6.0","ENSMUSG00000059336"
"1716","","",,,"Cluster 2","Pgk1","false","false","","Unclustered","6.066666666666666","Clustered","7.583333333333333","ENSMUSG00000062070"
"1715","ARCHS4 Coexpression,55;Enrichr Queries,44;ReMap ChIP-seq,214;GTEx Coexpression,502","MDC1,GLDC,GFI1,LRR1,MKI67,ENO3,SPIB,CDC20,CREB3L4,DPYSL2,MYC,CHEK2,MYB,STMN1,CHEK1,LONP1,PIEZO1,SKP2,IER3,TMEM88B,SP110,SERPINF2,CLDN6,MXRA7,DNA2,KIF20B,PIF1,SDC4,STXBP1,CDCA7,NCAPG,SKA3,CRACR2B,STC2,BARD1,EGR2,SIVA1,FZD7,PLK1,OSGIN1,RMDN2,CDC7,CDC6,PARP12,FOSL1,TPX2,SDC1,SPATS2L,LRRN1,C2CD2L,ITM2C,TOP2A,CD40,BTG2,TGFB1I1,BRCA1,KIF11,PCSK4,KIF15,LFNG,TUBA1B,CHAF1A,C1QTNF1,MIS18BP1,NUF2,PBK,TIMP3,IDS,TK1,CEP55,PSD,NDC1,HELLS,RMI2,TMEM150A,SERPINB9,KIF23,KIF22,IL17RE,DDB2,B3GNT9,TUBB2A,KCNMA1,CKS2,MAPRE3,KIF2C,CRELD2,SGK2,DTYMK,PCNA,PRIM1,COL11A2,TYMS,UNG,RAD54B,PSMC3IP,SLC17A9,EXOSC8,LY6G6F,GINS1,CENPU,CDKN2C,SLC16A1,PLEKHA2,GPR55,ATAD2,SYVN1,RRP1B,ALDH4A1,CYP2W1,CENPF,MIS18A,ABI2,FKBP1B,FOSB,TRIP13,LGR5,FOXA3,MAD2L1,NRROS,IRS1,BUB1B,TTF2,ETS1,CELSR3,IGF1R,CCND1,CAPN2,TNFRSF8,KNTC1,PIM2,PDE8A,TGM2,RNF43,IGFBP4,ANKRD44,TTC7B,VASH2,ARID5B,VRK1,CDC25C,PLA2G15,MSH6,MELK,MSH2,IGFALS,CARD11,RTN2,BLM,NOTCH1,AK4,ZFP36L2,CCNB2,CCNB1,ORC1,ECT2,FAM83D,FN3K,FANCI,PRNP,TGFB2,CBX5,BTN2A2,DENND4B,AMBP,UBE2C,HMGA1,HMGA2,INHBB,INHBC,ISG20,CXCL10,CDK6,GGCX,NASP,DLG4,BAMBI,CDK1,TNFAIP8,CDCA7L,HMGB2,LRMP,MCM10,FOXM1,LMNB1,SPN,PIDD1,EXO1,ITGB7,MYBL2,EMILIN1,GAL3ST2,HIST1H1C,HS3ST3B1,RFC3,TGIF2,ITGA4,PPP2R5B,FAM219A,AXIN2,ETV4,SSTR5,DUSP22,CCNA2,ASPM,DBF4,IRF1,MCM3,BIRC5,MCM4,MCM5,GNB1L,TRIM59,MCM6,NEMP1,DOCK2,AGXT,DCTPP1,DTL,UHRF1,RSPH9,TTK,CXXC5,THBS1,AURKB,ASB16,AURKA,CECR2,POLD1,E2F1,LRIG1,HES1,BUB1,E2F7,E2F8,RRM2,SPAG5,SPAG4,ARID3A,NAP1L1,KLF4,TICRR,PRC1,IMPDH2,SLC25A30,VIM,SNTB1","104","203.8","","Tgif2","false","false","","Unclustered","0.6666666666666666","Unclustered","0.6666666666666666","ENSMUSG00000062175"
"1711","","",,,"Cluster 1","Gimap8","false","false","","Unclustered","4.909090909090909","Clustered","9.0","ENSMUSG00000064262"
"1708","","",,,"","Gmppb","false","false","","Unclustered","4.464285714285714","Unclustered","5.7142857142857135","ENSMUSG00000070284"
"1706","","",,,"Cluster 2","Mn1","false","false","","Unclustered","5.653846153846154","Clustered","7.269230769230769","ENSMUSG00000070576"
"1705","","",,,"Cluster 1","Fryl","false","false","","Unclustered","6.0","Clustered","9.0","ENSMUSG00000070733"
"1694","","",,,"Cluster 2","Plxnc1","false","false","","Unclustered","6.0","Clustered","8.0","ENSMUSG00000074785"
"1690","","",,,"","Urad","false","false","","Unclustered","4.0","Unclustered","5.0","ENSMUSG00000075543"
"1688","","",,,"Cluster 2","1700024P16Rik","false","false","","Unclustered","6.0","Clustered","7.0","ENSMUSG00000078612"
"1684","","",,,"Cluster 1","Ifit1bl1","false","false","","Unclustered","5.2","Clustered","9.0","ENSMUSG00000079339"
"1683","","",,,"Cluster 1","Kifc1","false","false","","Unclustered","6.1090909090909085","Clustered","10.0","ENSMUSG00000079553"
"1682","","",,,"","1500009L16Rik","false","false","","Unclustered","5.5","Unclustered","6.416666666666666","ENSMUSG00000087651"
"1679","","",,,"Cluster 1","Gm42372","false","false","","Unclustered","7.822222222222222","Clustered","9.272727272727273","ENSMUSG00000108348"
"1678","","",,,"Cluster 1","Vmn2r29","false","false","","Unclustered","5.2","Clustered","9.0","ENSMUSG00000110105"
"1676","ARCHS4 Coexpression,873;Enrichr Queries,650;GTEx Coexpression,330","FOXA1,CHPF,DIXDC1,ETS1,AMOT,SYDE2,RGS2,DPYSL2,DPYSL3,DPF3,IER3,EPM2A,EPHA4,SEMA6C,EPHA7,POSTN,IGFBP3,SHISA4,MITF,EML1,TPST1,SELENOM,LGALS12,RBP1,HOXB4,KCNQ4,HOXB3,HOXB2,NUPR1,HOXB8,MYL9,ARHGEF25,CACNA1A,CACNA1H,ZFP36L2,SCUBE1,BAG2,STC2,IGFBP7,FAM83D,NGFR,EGR2,TGFB2,RBPMS,VDR,FZD7,KLHL23,SSC5D,MT3,FOSL1,BMP4,CXCL10,ID4,FERMT2,CDKN1C,NRP1,NRP2,BTG2,TGFB1I1,HSPB8,FHL1,JPH1,C1QTNF1,MECOM,TIMP3,GPX3,DENND2A,COPZ2,GFRA1,NME4,WNT9A,PROX1,MN1,NR5A2,KCNMA1,KIT,PLEKHO1,SYNC,SMTNL2,PDZRN3,MGLL,CCDC69,LAMA4,PRUNE2,FAM129A,HOXD13,THBS1,AURKB,CLCN1,ALDH1B1,CAMK2N1,NT5DC2,ATOH8,POLD2,SLIT1,LRIG1,SLIT2,MSX1,TAF9B,RUNX1T1,EGLN1,CDKN2C,TPBG,KLF4,DLK1,NFIB,FOSB,COQ8A,TMEM229A","685","617.7","","Hoxa4","false","false","","Unclustered","0.0","Unclustered","0.0","ENSMUSG00000000942"
"1674","Literature ChIP-seq,7;ARCHS4 Coexpression,53;ENCODE ChIP-seq,3;Enrichr Queries,5;ReMap ChIP-seq,6;GTEx Coexpression,1","MDC1,EHF,LRR1,CCNF,KLHDC7A,MKI67,NOC2L,SMC4,ENO3,SOGA1,SMC2,CDC20,LGALS3,CREB3L4,MYC,CHEK2,CHEK1,MYB,STMN1,LONP1,FBXO5,SKP2,GTSE1,IER3,TIPIN,MBNL1,KNL1,ESCO2,KNSTRN,WDR76,CLDN6,NEIL3,CLDN9,HOXB3,ZG16,DNA2,KIF20B,PRR11,ASF1B,PIF1,CDCA3,SDC4,SHMT2,CDCA7,NCAPG,SKA3,IQGAP3,NCAPH,SKA1,DSN1,RACGAP1,FIGNL1,CEP72,CEP192,KCNN4,LHPP,PLK4,BARD1,DDIAS,XRCC2,PLK1,EIF2AK3,RMDN2,CDC7,CDC6,FOSL1,TPX2,ANLN,POLA1,FAM111A,CALR,C2CD2L,ATR,TOP2A,SUV39H2,TMEM151B,SUV39H1,NCAPG2,KIF14,BRCA1,KIF11,BRCA2,KIF15,HERPUD1,CHAF1B,TUBA1B,CHAF1A,FAM102A,MIS18BP1,NUF2,PBK,TK1,CEP55,NDC1,TCF19,TEAD4,HELLS,RMI2,CLUH,MYOF,KIF24,KIF23,KIF22,CIT,TUBB2A,MDFIC,INCENP,KIFC1,ANGPTL6,CKS2,KIF2C,VAMP2,DTYMK,PCNA,PLPPR2,PKN3,PRIM1,TYMS,CENPA,HSPA13,UNG,RAD54B,PSMC3IP,NT5E,TCOF1,USP1,RAD54L,SPTSSB,GINS1,CENPU,CDKN2C,ATAD5,GINS3,ATAD2,GPR55,SYVN1,RRP1B,CENPE,CENPF,MIS18A,CENPH,CENPI,CENPM,FOSB,AUNIP,CENPN,TRIP13,SPC24,CDKN3,MAD2L1,ERCC6L,ZWILCH,RAB3D,DSCC1,GMNN,BUB1B,TTF2,CEP128,CCND1,KNTC1,PHLDA3,GEN1,GAS2L3,LIG1,VRK1,CDC25C,TRAIP,PLA2G15,MELK,CCNE2,SCNN1A,DNMT1,BLM,NOTCH1,TROAP,ARHGAP19,PKMYT1,RAD51AP1,CCNB2,SYCE2,CCNB1,ITPRIPL1,ORC1,CLSPN,ECT2,FAM83D,FANCI,CCDC18,STIL,SDF2L1,CBX5,ARHGEF37,UBE2C,ARHGEF39,HMGA1,HMGA2,FANCB,ARHGAP24,CXCL10,DIAPH3,NR4A3,GGCX,NASP,DLG4,UBE2T,CDK1,AMOTL2,PLEKHM3,PSCA,MCM8,HMGB2,HSPB1,MCM10,FOXM1,CHTF18,LMNB1,EXO1,MYBL2,SPDL1,TOPBP1,MYBL1,POLE,HIST1H1C,RFC5,SMIM14,RFC3,RFC4,PIANP,TGIF2,CKAP2,MASTL,UPK3B,ETV4,SPTB,CCNA2,MMS22L,ASPM,CCNA1,DBF4,RBL1,ADGRF1,ESPL1,SAPCD2,TMBIM4,ASPH,MCM3,MCM4,BIRC5,TRIM59,MCM5,MCM6,MTFR2,NEMP1,DTL,MCM2,UHRF1,TTK,RSPH9,CXXC5,THBS1,AURKB,AURKA,SV2A,POLD1,NT5DC2,POLD2,E2F1,LRIG1,HES1,PDE6A,BUB1,E2F7,E2F8,RRM1,DUT,RRM2,SPAG5,MND1,TICRR,RAD51,MLPH,PRC1,VIM,SNTB1","2","12.5","","Foxm1","false","false","","Unclustered","1.4","Unclustered","3.0","ENSMUSG00000001517"
"1673","","",,,"","Lama4","false","false","","Unclustered","5.0","Unclustered","7.0","ENSMUSG00000019846"
"1672","Literature ChIP-seq,65;ARCHS4 Coexpression,619;Enrichr Queries,830;GTEx Coexpression,320","FOXA1,MDC1,RAB3C,DIXDC1,RORA,NOC2L,ETS1,AMOT,IGF1R,SYDE2,COMP,SCGN,RGS2,CCND1,MYC,DPYSL3,MYB,PIEZO1,HOXA4,FBXO9,KCNH2,EPHA7,IGFBP3,IGFBP2,FRMD4A,ISL1,EML1,TIAM1,SELENOM,SMO,RAB37,HOXB4,KCNQ4,HOXB3,HOXB2,LMX1B,HOXB8,MYL9,FAM114A1,ARHGEF25,CACNA1A,LPL,CACNA1C,IQGAP3,CACNA1H,BAG2,RACGAP1,MDN1,FANCI,EGR2,DTNA,OSBPL5,BDNF,FZD7,PLK1,HMGA2,KLHL23,SSC5D,FOSL1,BMP4,BMP3,CXCL10,CDK6,DIAPH3,LHX1,FEV,ID4,FXYD6,FGFR3,RET,PTPRU,COL18A1,NRP2,BTG2,TGFB1I1,PDE3B,NCAPG2,MCM10,FOXM1,ARHGAP6,LMNB1,CHAF1A,MECOM,EXO1,TIMP3,EMILIN1,MYBL2,CC2D2A,POLE,CLUH,NME4,ETV1,GFRA1,PAX6,IL17RD,ETV4,NR5A2,SETBP1,ESPL1,INCENP,KCNMA1,KIT,CDC42EP3,MCM3,LANCL3,BIRC5,MCM4,PLEKHO1,NEMP1,PDZRN3,DTL,PCNA,PKN3,CCDC69,PRUNE2,NTN4,LRP3,TTK,THBS1,AURKB,PTGS1,GNG2,TCOF1,POLD1,NT5DC2,LRIG1,E2F1,MSX1,SLIT2,JAZF1,GINS1,CENPU,SORBS2,NAP1L1,RRP1B,KLF4,POU4F1,TICRR,CENPF,KLHL5,ABI2,PRC1,CENPI,FOSB,INSM1","429","458.5","","Hoxd13","false","false","","Unclustered","5.5","Unclustered","6.416666666666666","ENSMUSG00000001819"
"1671","","",,,"Cluster 2","Bmp4","false","false","","Unclustered","5.785714285714286","Clustered","7.111111111111111","ENSMUSG00000021835"
"1670","","",,,"","Lefty1","false","false","","Unclustered","2.0","Unclustered","2.0","ENSMUSG00000038793"
"1669","","",,,"Cluster 2","Wnt9a","false","false","","Unclustered","6.3238095238095235","Clustered","7.904761904761904","ENSMUSG00000000126"
"1668","","",,,"","Gcg","false","false","","Unclustered","6.0","Unclustered","6.027777777777779","ENSMUSG00000000394"
"1667","","",,,"Cluster 2","Gabra2","false","false","","Unclustered","5.785714285714286","Clustered","7.0","ENSMUSG00000000560"
"1666","","",,,"Cluster 2","Cacna1b","false","false","","Unclustered","5.785714285714286","Clustered","8.0","ENSMUSG00000004113"
"1664","","",,,"Cluster 2","Slc1a3","false","false","","Unclustered","4.285714285714286","Clustered","7.0","ENSMUSG00000005360"
"1663","","",,,"Cluster 1","Neurl1a","false","false","","Unclustered","4.800000000000001","Clustered","9.0","ENSMUSG00000006435"
"1662","ARCHS4 Coexpression,21;Enrichr Queries,35;GTEx Coexpression,87","RAB3C,CNTFR,STMN3,RORA,SOGA1,CELSR3,SLC8A1,SAMD14,CDH2,KIF5C,BASP1,DPYSL2,DPYSL3,PALM,TNR,CHGB,KCNH2,TLE2,RBFOX3,UNC5A,TMEM178B,APLP1,CACNA2D2,MAPK8IP2,RUNDC3A,MAPK8IP1,DISP2,CLIP3,TIAM1,ACAP3,GPR162,OLFM1,RAB37,GPRIN1,MAP1B,LGALS12,SCG5,SCG3,SCG2,BRSK1,BRSK2,NDRG4,KHDRBS3,STXBP1,CACNA1B,CACNA1A,NREP,CACNA1C,CPLX2,CACNA1H,RAP1GAP,GOLGA7B,NEUROD1,IGSF21,NEUROD2,TRPM2,MAP2,NHLH1,MAP6,NPTX1,KIF3C,RHBDL3,NPTX2,SCN3B,SCN3A,RAB6B,PLXNA4,B4GALNT4,ASIC1,PLK5,CARMIL3,SYT1,CADM1,ST8SIA3,ESRRG,CORO2B,SYT7,DCLK1,ST18,GNG13,GADD45G,GNAO1,REEP1,PKIB,XKR7,PKIA,REEP2,CPE,FXYD6,XKR4,CNIH2,FGFR3,MAP3K12,CDKN1C,SNAP25,CNTNAP2,PCSK1,PTPRR,BTG2,TMEM151B,KCNC1,TENM4,NCAN,RASGRF1,DIRAS2,GRIK3,CELF5,DOC2B,SYNE1,UNC80,JPH4,MMP24,KCNT1,PCLO,TUBA1A,SLC22A17,MCF2L,TRIM3,GDAP1L1,DNER,NEFM,CEP170,KIF1A,SULT4A1,TRIM67,APC2,RPS6KL1,PIANP,ACTL6B,ABCC8,PPP2R5B,ETV1,PAX6,NAV1,OLIG1,FAM219A,SYP,PROX1,MANEAL,KCNAB3,CBFA2T3,CNKSR2,TUBB2A,SETBP1,KCNMA1,CAMK2B,DDC,SEZ6,CRMP1,ADCY1,PPM1E,CXXC4,AURKB,NCALD,DLL3,ABLIM1,GNG2,GNG4,SV2A,SPOCK2,LRIG1,SLIT1,SPOCK1,APBB1,PAK3,GABRD,CCDC184,RUNX1T1,CHGA,KCNB1,PCDHGC4,PCDH8,CADPS,KLHL3,SORBS2,SYT13,TUBB4A,STXBP5L,MAB21L3,SLC4A8,NFASC,NFIB,SYT11,NOVA2,RIMBP2,INSM1,CBLN3,UNC79","7","47.67","Cluster 2","Myt1","false","false","","Unclustered","6.1090909090909085","Clustered","8.0","ENSMUSG00000010505"
"1657","","",,,"","Krt10","false","false","","Unclustered","5.0","Unclustered","5.0","ENSMUSG00000019761"
"1656","","",,,"Cluster 1","Srgap1","false","false","","Unclustered","6.236363636363636","Clustered","8.4","ENSMUSG00000020121"
"1655","","",,,"Cluster 1","Stc2","false","false","","Unclustered","5.9393939393939394","Clustered","9.0","ENSMUSG00000020303"
"1654","","",,,"Cluster 2","Fam64a","false","false","","Unclustered","4.761904761904762","Clustered","8.0","ENSMUSG00000020808"
"1653","","",,,"Cluster 2","Scgn","false","false","","Unclustered","5.333333333333333","Clustered","7.0","ENSMUSG00000021337"
"1651","","",,,"Cluster 2","Cpb2","false","false","","Unclustered","5.166666666666667","Clustered","7.0","ENSMUSG00000021999"
"1650","","",,,"","Nefm","false","false","","Unclustered","2.7","Unclustered","2.7","ENSMUSG00000022054"
"1648","","",,,"Cluster 2","Gart","false","false","","Unclustered","5.166666666666667","Clustered","7.0","ENSMUSG00000022962"
"1647","","",,,"Cluster 2","Pla2g7","false","false","","Unclustered","4.761904761904762","Clustered","7.0","ENSMUSG00000023913"
"1646","","",,,"Cluster 1","Rsph1","false","false","","Unclustered","7.822222222222222","Clustered","10.0","ENSMUSG00000024033"
"1643","","",,,"","Pnliprp2","false","false","","Unclustered","2.7","Unclustered","2.7","ENSMUSG00000025091"
"1642","","",,,"","Fgf14","false","false","","Unclustered","3.7333333333333334","Unclustered","5.0","ENSMUSG00000025551"
"1640","","",,,"Cluster 1","Lrrn2","false","false","","Unclustered","7.418181818181818","Clustered","9.0","ENSMUSG00000026443"
"1639","","",,,"Cluster 2","Kif5c","false","false","","Unclustered","6.1090909090909085","Clustered","7.288888888888889","ENSMUSG00000026764"
"1638","","",,,"","Lrrc26","false","false","","Unclustered","1.4","Unclustered","1.4","ENSMUSG00000026961"
"1637","","",,,"Cluster 1","Map1a","false","false","","Unclustered","8.0","Clustered","9.0","ENSMUSG00000027254"
"1634","","",,,"Cluster 1","Uox","false","false","","Unclustered","7.822222222222222","Clustered","9.272727272727273","ENSMUSG00000028186"
"1633","","",,,"","Sh3bgrl3","false","false","","Unclustered","3.0","Unclustered","3.0","ENSMUSG00000028843"
"1632","","",,,"Cluster 2","Gxylt2","false","false","","Unclustered","5.5","Clustered","6.75","ENSMUSG00000030074"
"1631","","",,,"","Gipr","false","false","","Unclustered","5.0","Unclustered","5.0","ENSMUSG00000030406"
"1626","","",,,"Cluster 1","Cadm1","false","false","","Unclustered","6.236363636363636","Clustered","8.678571428571429","ENSMUSG00000032076"
"1625","","",,,"Cluster 1","Celf6","false","false","","Unclustered","5.785714285714286","Clustered","9.0","ENSMUSG00000032297"
"1624","","",,,"Cluster 2","Slco2a1","false","false","","Unclustered","4.690909090909091","Clustered","7.0","ENSMUSG00000032548"
"1623","","",,,"Cluster 2","Resp18","false","false","","Unclustered","4.464285714285714","Clustered","7.0","ENSMUSG00000033061"
"1621","ARCHS4 Coexpression,15;Enrichr Queries,32;GTEx Coexpression,314","SEMA5A,RAB3B,RAB3C,TUSC3,KLHL32,RORA,SLC8A1,RGS4,SCGN,RGS2,CDH2,KIF5C,BASP1,DPYSL2,STMN1,PIP4K2A,THSD7A,PLXNC1,CHGB,TMEM88B,EPHA4,EPHA7,CHRNB4,CACNA2D1,DAPK2,APLP1,FRMD4A,KCNK16,TM4SF4,VWA5B2,MYT1,ISL1,TIAM1,OLFM1,RFX6,MAP1B,LGALS12,RBP1,SCG5,PADI2,SCG3,KCTD12,SCG2,STX1A,BEX2,PDE1C,STXBP1,ARX,CACNA1B,CACNA1A,LPL,NREP,PKMYT1,CPLX2,NEUROD1,TRPM2,FAM221A,MAP2,NHLH1,ST8SIA4,MAP6,NPTX1,NPTX2,SCN3B,SCN3A,RAB11FIP4,LHPP,NKX2-2,TGFB2,SYT1,CADM1,NEBL,ST8SIA3,RAB39B,DNAJC12,ESRRG,CORO2B,DCLK1,SYT7,GADD45G,GNAO1,ANLN,FA2H,CXCL10,PEX5L,PLCXD3,RCAN2,CPE,XKR4,PAM,CD200,CDKN1C,SNAP25,NRP1,CNTNAP2,PTPRU,PCSK1,BTG2,TENM4,CELF2,PTPRN,RASGRF1,DIRAS2,RND3,SYNE1,UNC80,PCLO,TUBA1A,SCRN1,UCN3,DNER,IDS,CEP170,NEFM,KIF1A,FFAR1,TRIM67,BCAS1,APC2,DST,ABCC8,PAX6,ETV1,NAV1,PROX1,RHOC,SYNGR4,ZDHHC14,BACE1,GPRC5B,KIT,ALDH1A1,KCNMA1,PLCB1,ASPA,RAPGEF4,CAMK2B,AMER2,RGS17,DDC,RGS16,PRUNE2,CRYBA2,CRMP1,ADCY1,CXXC5,THBS1,CXXC4,TMEM163,AURKB,NCALD,AGPAT4,GNG2,GNG4,SPOCK2,CARNS1,PRRG1,LRIG1,SPOCK1,APBB1,PAK3,RUNX1T1,SEC11C,CHGA,GSN,KCNB2,PLCL1,CADPS,SORBS2,SYT14,GCG,SYT13,PNMA2,TUBB4A,SORL1,GCK,STXBP5L,TTLL7,SLC4A8,NFASC,FAM167A,FMNL2,GSTA4,SYT11,NFIB,ASXL3,QPCT,RIMBP2,VIM,INSM1,UNC79","45","120.3","Cluster 2","St18","false","false","","Unclustered","5.0","Clustered","7.0","ENSMUSG00000033740"
"1620","","",,,"Cluster 4","Map9","false","false","","Unclustered","5.076923076923077","Clustered","5.714285714285714","ENSMUSG00000033900"
"1619","","",,,"","Igsf9b","false","false","","Unclustered","3.7333333333333334","Unclustered","3.7333333333333334","ENSMUSG00000034275"
"1616","","",,,"","Dsg1c","false","false","","Unclustered","6.0","Unclustered","6.5","ENSMUSG00000034774"
"1615","","",,,"Cluster 1","Rims4","false","false","","Unclustered","7.418181818181818","Clustered","9.0","ENSMUSG00000035226"
"1614","","",,,"Cluster 2","Ssc5d","false","false","","Unclustered","6.236363636363636","Clustered","7.127272727272727","ENSMUSG00000035279"
"1612","","",,,"","Fbxl21","false","false","","Unclustered","5.571428571428571","Unclustered","6.027777777777779","ENSMUSG00000035509"
"1611","","",,,"Cluster 1","Ky","false","false","","Unclustered","5.833333333333334","Clustered","8.4","ENSMUSG00000035606"
"1607","Literature ChIP-seq,63;ARCHS4 Coexpression,910;Enrichr Queries,113;GTEx Coexpression,61","SLC46A3,CNTFR,STMN3,LDLRAD3,SOGA1,SPIB,PREX1,SAMD14,RPS6KA6,DPYSL2,LIPH,RASSF6,PIEZO1,GTSE1,SLC12A8,CHGB,PDK1,EPHA4,UNC5A,RBFOX3,RSAD2,ACSL6,MAPK8IP2,TIAM1,GPR162,EML6,MYL7,PLPP4,COL8A1,KCTD12,NGEF,PADI1,TSPYL4,RWDD2A,PDE1C,SHMT2,STXBP1,AGAP2,LYPD6,NCAPH,TRPM2,PGBD5,FAM43A,SCN3A,NKX2-2,EGR2,PLK5,CARMIL3,SPHKAP,CADM1,TNFSF15,FZD7,PLK1,EIF2AK3,CDC6,NR0B2,ST18,GNG13,PKIB,XKR7,KLHDC8A,PPP1R1B,ID4,RGL3,CALR,IGSF9B,CDK14,FERMT2,CDKN1C,PTPRU,PTPRR,NRP2,CD40,TMEM151B,KCNC1,PTPRN,ZFAND2A,DIRAS2,SERPINA9,LFNG,TUBA1B,SCML2,MMP24,KCNT1,PCLO,TMEM44,TRIM3,PBK,NEFM,PLEKHN1,QSOX2,PSD,APC2,FOXD2,ACTL6B,SLC2A10,PAX6,PROX1,MANEAL,SYN2,ZDHHC14,CNKSR2,RNF144B,MN1,CLDN14,B3GNT5,KCNMA1,SLC29A4,SYNC,GAS6,DBN1,SDCCAG8,CD63,TMPRSS7,SLC43A2,SEZ6,SNX32,ZDHHC21,ADCY1,NPL,PHYHIP,RHD,ADCY5,TMEM71,HSD17B2,AGR2,RPRML,APBB1,MSX1,GABRD,RUNX1T1,GABRA2,GINS1,GABRA1,GABBR2,RIC3,SLC16A1,KCNB1,SUSD2,RPA1,KLHL3,TUBB4A,LYVE1,GCK,AGT,STXBP5L,TTC8,FABP5,NFIB,YPEL1,COQ8A,FOXA1,SEMA5A,GPR68,IRS1,RAB3D,DSCC1,RORA,OTP,CELSR3,GIMAP8,SLC25A48,SCGN,CAPN9,BASP1,ADORA1,TEKT4,PLXNC1,SLC16A9,EPM2A,KCNH3,TLE2,MREG,DIO1,IGFBP2,TTC7B,MYT1,DISP2,ACAP3,OLFM1,PROCR,OBSCN,RAB37,GPRIN1,ADAM12,BRSK2,NDRG4,NOTCH1,CTTNBP2,CACNA1B,GPR85,CACNA1A,NREP,CPLX2,PKMYT1,FBLN2,CACNA1H,FUT4,ZFP36L2,GOLGA7B,NEUROD1,IGSF21,SCUBE1,CALHM2,BAG2,CLCA1,NPTX1,KIF3C,NXPH1,NPTX2,TAC1,FAM83D,ASIC1,SDF2L1,SYT1,BDNF,OSBPL2,ZBTB10,MT3,SYT7,PYY,EFNA3,DAP,CPS1,SP6,SLC26A4,CNIH2,MAP3K12,GPSM1,PNLIPRP1,SNAP25,TRIM72,ONECUT3,RASGRF1,LECT2,TNFAIP2,CELF5,NRGN,LMNB1,UNC80,GRM2,SCRN1,MCF2L,GDAP1L1,IFT57,SULT4A1,TRIM67,DACT1,SLC36A1,TRPC7,TGIF2,RFC4,PPP2R5B,HUNK,TBC1D8,ETV1,OLIG1,NAV1,KCNAB3,UPK3B,SSTR5,FGR,VGF,GFOD1,TMBIM4,OAS3,ATP6V1B2,CAMK2B,RGS14,ASAP3,SEMA3G,CRMP1,NLRC3,CXXC5,SRL,PPM1E,CLCN1,NCALD,PDE11A,GNG4,SPOCK2,SPOCK1,HES1,HES5,CHGA,TRIM40,ANGPT2,SPAG5,RNF24,PCDHGC4,PCDH8,CCK,SYT14,ARID3A,MND1,NAP1L1,SYT13,FBXL16,MAB21L3,RAB15,NOVA2,BCL6B,INSM1,PABPC1L,CBLN3","196","286.8","","Neurod2","false","false","","Unclustered","4.726467331118494","Unclustered","4.726467331118494","ENSMUSG00000038255"
"1605","","",,,"Cluster 2","Dennd2a","false","false","","Unclustered","4.230769230769231","Clustered","8.0","ENSMUSG00000038456"
"1604","","",,,"Cluster 1","Nipal2","false","false","","Unclustered","5.066666666666666","Clustered","9.0","ENSMUSG00000038879"
"1602","","",,,"","Gsap","false","false","","Unclustered","5.7272727272727275","Unclustered","6.424242424242424","ENSMUSG00000039934"
"1601","","",,,"Cluster 4","Plekhh2","false","false","","Unclustered","4.800000000000001","Clustered","5.911111111111111","ENSMUSG00000040852"
"1600","","",,,"","Kctd12b","false","false","","Unclustered","3.7333333333333334","Unclustered","5.0","ENSMUSG00000041633"
"1598","","",,,"","Ttc9","false","false","","Unclustered","5.785714285714286","Unclustered","6.5","ENSMUSG00000042734"
"1597","","",,,"Cluster 2","Fam89a","false","false","","Unclustered","6.171428571428572","Clustered","7.21978021978022","ENSMUSG00000043068"
"1595","","",,,"Cluster 1","A430105I19Rik","false","false","","Unclustered","6.1090909090909085","Clustered","9.0","ENSMUSG00000045838"
"1592","","",,,"Cluster 1","Kcnv2","false","false","","Unclustered","6.377777777777777","Clustered","9.0","ENSMUSG00000047298"
"1591","ARCHS4 Coexpression,1034;Enrichr Queries,170;GTEx Coexpression,688","SEMA5A,PROS1,AQP7,RORA,NR3C1,ETS1,SLC4A4,ELK3,CDH2,DPYSL2,DPYSL3,THSD7A,PLXNC1,EPHA4,POSTN,IGFBP4,IL1R1,CACNA2D1,IGFBP3,TTC7B,ARID5B,RNASE4,SYTL4,PDIA6,FAM227A,DISP2,PROCR,MAP1B,ADAM12,LGALS12,SERPING1,KCTD12,NOTCH4,CACNA1A,NREP,FAM221A,CALHM2,PRKAR2B,NPHP3,IGFBP7,RAI2,EGR2,TGFB2,CADM1,HMGA1,ARHGAP29,INHBB,ESRRG,MCC,FBXO32,DCLK1,ARHGAP24,SDK1,CXCL10,LYPD6B,CPE,FAT4,XKR4,ITM2C,CDKN1C,NRP1,COL18A1,CNTNAP2,TENM4,CELF2,PTPRM,SYNE1,LMNB1,MECOM,TIMP3,CGNL1,PLEKHG1,ARHGEF15,DST,PROX1,ZDHHC15,MDFIC,SETBP1,KIFC1,PLSCR4,KIT,ALDH1A1,KCNMA1,PDZRN3,ASPA,PLEKHH2,LAMA4,PAPLN,ASAP3,SEMA3G,FAM129A,SLC5A10,THBS1,AURKB,NCALD,DLL4,ABLIM1,SRPX2,SLIT1,LRIG1,SLIT2,RUNX1T1,GSN,KCNB1,SORBS2,LHFPL2,KLF4,LYVE1,SORL1,MAB21L3,MGAT4C,NFIB,CSDC2,CACHD1","702","630.7","","Tshz2","false","false","","Unclustered","5.785714285714286","Unclustered","5.785714285714286","ENSMUSG00000047907"
"1589","","",,,"","Plcxd3","false","false","","Unclustered","5.0","Unclustered","4.523809523809524","ENSMUSG00000049148"
"1588","","",,,"","Sv2c","false","false","","Unclustered","4.0","Unclustered","4.0","ENSMUSG00000051111"
"1587","","",,,"","Eml5","false","false","","Unclustered","5.066666666666666","Unclustered","5.911111111111111","ENSMUSG00000051166"
"1586","","",,,"","Plcb1","false","false","","Unclustered","4.0","Unclustered","5.0","ENSMUSG00000051177"
"1585","","",,,"Cluster 1","Btn2a2","false","false","","Unclustered","7.5636363636363635","Clustered","9.272727272727273","ENSMUSG00000053216"
"1583","","",,,"","Spock1","false","false","","Unclustered","4.761904761904762","Unclustered","5.7142857142857135","ENSMUSG00000056222"
"1581","","",,,"","Spock2","false","false","","Unclustered","4.464285714285714","Unclustered","5.7142857142857135","ENSMUSG00000058297"
"1579","","",,,"Cluster 2","Kcnh7","false","false","","Unclustered","4.464285714285714","Clustered","7.0","ENSMUSG00000059742"
"1575","","",,,"Cluster 2","Myo1h","false","false","","Unclustered","7.418181818181818","Clustered","7.909090909090909","ENSMUSG00000066952"
"1574","","",,,"Cluster 2","Cxx1a","false","false","","Unclustered","4.761904761904762","Clustered","7.0","ENSMUSG00000067925"
"1572","","",,,"Cluster 1","Ccdc190","false","false","","Unclustered","6.377777777777777","Clustered","8.357142857142858","ENSMUSG00000070532"
"1571","","",,,"","Gal3st2","false","false","","Unclustered","2.7","Unclustered","2.7","ENSMUSG00000094651"
"1570","ARCHS4 Coexpression,183;GTEx Coexpression,4","ERCC6L,ZWILCH,LRR1,CCNF,BUB1B,MKI67,SMC4,SMC2,CDC20,MTBP,GNAT2,CHEK1,RTTN,KNTC1,FBXO5,SKP2,PDE8B,GTSE1,TIPIN,LIG1,ZGRF1,VRK1,KNL1,ESCO2,CDC25C,WDR76,TLE6,TRAIP,TIAM1,NEIL3,MELK,MSH2,GEMIN5,KIF20B,PRR11,ASF1B,SEMA7A,CDCA3,TROAP,NCAPG,PKMYT1,SKA3,IQGAP3,NCAPH,SKA1,RAD51AP1,CCNB2,DSN1,CCNB1,RACGAP1,ORC1,CEP72,CLSPN,ECT2,PLK4,FANCI,CCDC18,STIL,DDIAS,UBE2C,XRCC2,PLK1,CCDC15,CDC7,FANCB,CDC6,TPX2,DIAPH3,NASP,CDK1,TOP2A,SUV39H2,MCM8,NCAPG2,KIF14,MCM10,BRCA1,KIF11,FOXM1,BRCA2,CHTF18,KIF15,LMNB1,HPF1,CHAF1A,EXO1,NUF2,PBK,MYBL2,SPDL1,TOPBP1,POLE,CEP55,NDC1,TCF19,HELLS,RMI2,RFC3,RFC4,CKAP2,KIF23,OOEP,CCNA2,MMS22L,ASPM,DBF4,ESPL1,INCENP,KIFC1,MCM3,CKS2,MCM4,BIRC5,MCM5,KIF2C,DNAJC9,MCM6,MTFR2,DTL,MCM2,PCNA,UHRF1,PRIM1,TTK,TYMS,CENPA,AURKB,AURKA,PSMC3IP,TCOF1,POLD1,USP1,E2F1,RAD54L,BUB1,E2F7,GINS1,CENPU,RRM2,ATAD5,SPAG5,ATAD2,MND1,TICRR,CENPE,CENPF,MPHOSPH9,MIS18A,RAD51,WEE2,CENPH,CENPI,PRC1,CENPM,AUNIP,TRIP13,SPC24,MAD2L1","32","93.5","","Dnmt1","false","false","","Unclustered","1.4727272727272727","Unclustered","1.4727272727272727","ENSMUSG00000004099"
"1569","","",,,"","Tmem27","false","false","","Unclustered","4.761904761904762","Unclustered","8.0","ENSMUSG00000015401"
"1568","","",,,"Cluster 2","Rdh12","false","false","","Unclustered","5.0","Clustered","7.0","ENSMUSG00000021123"
"1564","","",,,"Cluster 2","Hspb8","false","false","","Unclustered","5.785714285714286","Clustered","6.75","ENSMUSG00000041548"
"1563","","",,,"Cluster 1","Ptpre","false","false","","Unclustered","8.0","Clustered","10.0","ENSMUSG00000041836"
"1561","","",,,"Cluster 1","Lhfpl4","false","false","","Unclustered","5.785714285714286","Clustered","9.0","ENSMUSG00000042873"
"1560","","",,,"","Cbfa2t3","false","false","","Unclustered","0.0","Unclustered","0.0","ENSMUSG00000006362"
"1559","","",,,"","Epb42","false","false","","Unclustered","2.0","Unclustered","3.0","ENSMUSG00000023216"
"1558","ARCHS4 Coexpression,748;Enrichr Queries,746;ReMap ChIP-seq,19;GTEx Coexpression,285","IFITM3,EHF,GFI1,MKI67,SOGA1,IFIT3,SPIB,PREX1,LGALS3,RINL,MYC,CREB3L2,MYB,RASSF6,TNFSF10,PIP4K2A,RSAD2,SP110,DAPK2,ESCO2,RNASE1,PADI2,PIF1,GIPR,AGAP2,PLA2G7,PIK3R5,FAM221A,INPP5D,KCNN4,ST3GAL2,FAM120AOS,EGR2,CARMIL2,NBEAL2,ABCA7,RGL1,ITM2C,DENND1C,CD40,NRP2,BTG2,TMEM151B,TENM4,SH3KBP1,KIF14,RCSD1,CX3CL1,HERPUD1,LIMD2,GLIPR1,SH3BGRL3,FFAR2,FFAR1,CEP68,CD53,HELLS,IZUMO4,TMEM150A,MYOF,WDR31,GPBAR1,SERPINB9,MANEAL,CBFA2T3,VAV1,APBB1IP,HCK,MDFIC,ANGPTL6,B3GNT6,KCNMA1,KIT,PLEKHO1,KIF2C,PCNA,SLC43A3,PRIM1,DERL3,PRUNE2,PAPLN,TYMS,FAM214A,RAD54B,TMEM71,FGD2,ALOX5,CARNS1,ATAD5,PLEKHA2,GPR55,LAPTM5,TUBB4A,NFIB,CENPM,FOSB,NRROS,CD83,NCF2,TTF2,NR3C1,CXCL13,ALDH1L2,ETS1,CNDP2,RGS2,CCRL2,TNFRSF8,PIM2,PDE8A,ANKRD44,MPEG1,ADAM19,SIDT1,RELL2,CARD11,RTN2,BRSK1,SEMA7A,AKNA,HVCN1,SLC41A2,TCF7,ITPR2,FBXO48,FUT2,ZFP36L2,RAD51AP1,KCNV2,ORC1,NLRP6,CYP11A1,PLXNA4,STIL,BTN2A2,ISG15,GNAO1,ISG20,CXCL10,REEP5,GGCX,MAP3K14,TRIM72,TNFAIP8,CDCA7L,HMGB2,TNFAIP2,ATP2A3,LRMP,ITGAL,PIK3CG,LMNB1,NRGN,SPN,GM2A,MCF2L,ITGB7,MYBL2,PIANP,TGIF2,ITGA4,SH2D3C,PLAUR,SSTR3,DUSP22,FGR,ADORA2A,RASA3,OAS3,IRF1,MCM3,IRF7,BIRC5,MCM5,MTFR2,DOCK2,SPACA6,MCTP2,ST6GALNAC4,MCM2,CCDC69,NLRC3,CXXC5,THBS1,AURKB,SH3BP1,POLD1,E2F7,PLA2G2D,RRM2,QPCTL,ARID3A,KLF4,SORL1,FMNL3,RSPH1,FAM167A,ALOX5AP,TRIM38","415","449.5","","Spib","false","false","","Unclustered","0.4991596638655462","Unclustered","0.4991596638655462","ENSMUSG00000008193"
"1555","","",,,"Cluster 2","Chga","false","false","","Unclustered","8.0","Clustered","8.181818181818182","ENSMUSG00000021194"
"1554","ARCHS4 Coexpression,376;Enrichr Queries,736;GTEx Coexpression,546","IFITM3,NRROS,CD83,NCF2,GFI1,AQP9,TMEM140,IFIT3,IFIT2,LGALS3,RGS2,RINL,CCND1,MYC,TNFSF10,LONP1,TGM2,IER3,ZBP1,RSAD2,SP110,ANKRD44,IGFBP3,MPEG1,IFI27,MFNG,S100A6,SERPING1,RIN3,NUPR1,CARD11,AKNA,TCF7,PIK3R5,GRK2,INPP5D,ST8SIA4,PRNP,EGR2,ISG15,NBEAL2,ABCA7,PARP12,ISG20,CXCL10,XAF1,ITM2C,DENND1C,BTG2,CD40,TNFAIP2,HSPB1,LRMP,ITGAL,LMNB1,LIMD2,SPN,LFNG,PSTPIP1,ADGRE5,ITGB7,FFAR2,CD53,WARS,PLAUR,GPBAR1,SERPINB9,VAV1,APBB1IP,FGR,HCK,ADORA2A,OAS3,IRF1,PLEKHO1,TLR6,MCTP2,DOCK2,HCST,C1QA,SLC43A2,RGS14,NLRC3,THBS1,USP18,AURKB,FGD2,SH3BP1,ALOX5,GSN,GCH1,LAPTM5,ARID3A,KLF4,FMNL1,ALOX5AP,FOSB,VIM,CD244,YPEL3","592","552.7","","Irf7","false","false","","Unclustered","1.6764705882352942","Unclustered","4.0476190476190474","ENSMUSG00000025498"
"1552","","",,,"Cluster 1","Guca2b","false","false","","Unclustered","6.329670329670329","Clustered","9.444444444444445","ENSMUSG00000032978"
"1551","","",,,"","Vash2","false","false","","Unclustered","4.0","Unclustered","4.0","ENSMUSG00000037568"
"1550","","",,,"","Abcc8","false","false","","Unclustered","6.0","Unclustered","6.0","ENSMUSG00000040136"
"1549","","",,,"Cluster 1","Dennd4b","false","false","","Unclustered","5.5","Clustered","10.0","ENSMUSG00000042404"
"1548","","",,,"","Jph1","false","false","","Unclustered","5.0","Unclustered","6.0","ENSMUSG00000042686"
"1547","","",,,"","Sh2d7","false","false","","Unclustered","3.7333333333333334","Unclustered","6.0","ENSMUSG00000046460"
"1546","","",,,"Cluster 1","Mpeg1","false","false","","Unclustered","5.5","Clustered","10.0","ENSMUSG00000046805"
"1545","","",,,"","Gpr68","false","false","","Unclustered","3.7333333333333334","Unclustered","6.0","ENSMUSG00000047415"
"1544","","",,,"","Amica1","false","false","","Unclustered","5.0","Unclustered","6.0","ENSMUSG00000048534"
"1542","","",,,"Cluster 1","Tmem158","false","false","","Unclustered","6.377777777777777","Clustered","9.0","ENSMUSG00000054871"
"1541","","",,,"","Slc31a2","false","false","","Unclustered","6.0","Unclustered","6.027777777777779","ENSMUSG00000066152"
"1537","Literature ChIP-seq,93;ARCHS4 Coexpression,507;Enrichr Queries,521;GTEx Coexpression,547","IFITM3,FAM89A,NOC2L,MKI67,ELK3,LGALS3,PREX1,DPYSL2,MYC,CHEK1,LONP1,PIEZO1,CCDC92,HABP2,IER3,HOXA4,EPHA4,MBNL1,IL1R1,P3H1,RNASE4,P3H3,HSPG2,EML6,LGALS12,MAP1A,HOXB3,RIN3,HOXB2,KCTD12,KDELR3,CYP2E1,KIF20B,HOXB8,STX1A,SDC4,GIPR,ENDOD1,CRACR2B,PRKAR2B,STC2,INPP5D,ST8SIA4,ST3GAL1,TSPAN1,ST3GAL2,ATP6V0A1,SLC19A2,FZD7,OSGIN1,RASSF9,RAB27B,ABCA7,FOSL1,MOV10,XKR7,ARTN,TNFSF4,FXYD2,SDC1,SPATS2L,C2CD2L,ITM2C,XKR5,CDKN1C,ACVRL1,NRP1,COL18A1,BTG2,NRP2,ECM1,LRRC10B,TGFB1I1,ICA1,PTPRM,MIA3,KIF11,ARHGAP6,HERPUD1,LFNG,GLIPR1,TUBA1B,FAM102B,STBD1,TIMP2,TIMP3,SH3BGRL3,TEAD4,FOXD2,MYOF,PAX6,MANEAL,PROX1,RHOC,IL17RD,DDB2,CIT,GPRC5B,NR5A2,MDFIC,CDC42EP3,ADSSL1,MAPRE3,MGLL,DBN1,VGLL3,SLC43A3,SLC43A1,FAM129A,HOXD13,SNX33,NPL,PTGS1,NT5E,SRPX2,AGR2,RAD54L,LY6G6F,SPDEF,GABBR2,GDF11,GSN,SLC16A1,SUSD1,LAPTM5,SYVN1,LHFPL5,GPR4,LHFPL2,PNMA2,GFI1B,RIT1,TMEM158,KRT15,FKBP1B,COQ8A,NUCB2,STEAP3,NRROS,CHPF,IRS1,PROS1,CHRM4,RTKN2,NR3C1,TMEM140,ETS1,CELSR3,GIMAP8,RGS2,CCND1,CAPN2,SH2D6,TGM2,CD93,IGFBP4,IGFBP3,ARID5A,ARID5B,SDCBP2,ADAM19,PROCR,ACAP3,RAB37,MFNG,GPRIN1,ADAM12,S100A6,INTS6L,BRSK2,NDRG4,DNMT1,NOTCH1,AKNA,FAM114A1,HTRA3,GMPR,FBLN2,FUT1,AK7,ZFP36L2,CNN3,SLC9A3R2,NEUROD1,CALHM2,GRK2,ITPRIPL1,GRK5,ORC1,CYP11A1,IGFBP7,CLSPN,ECT2,MFAP3L,PRNP,STIL,TGFB2,ATP8B2,CAV2,BDNF,CRIM1,ARHGAP29,HMGA2,ISG15,INHBB,SSC5D,B3GALT5,CORO2B,INHBC,SYT7,ARHGAP23,BMP4,DAP,EFNA3,CDK6,NR4A3,DLG4,FEV,SPIRE1,AMOTL2,XAF1,TUBA8,KCNK6,HSPB1,NRARP,RND3,LMNB1,PIDD1,PSTPIP1,DUSP10,ADGRE5,EMILIN1,HS3ST3B1,PLEKHG1,EGFL7,ARHGEF15,GPX3,PLAUR,NAV1,CKAP4,ETV6,GIP,RCN1,ASPH,RASA3,ADORA2A,IRF1,PECAM1,ITGA5,FBP1,SMARCD3,RGS14,UHRF1,LAMA4,THBS1,AURKB,NSL1,PTHLH,MUC2,LRIG1,HES1,SLIT2,TRIM40,RRM1,RRM2,AHNAK2,KLF4,TTC39A,FMNL3,SYT11,TEK,VIM","363","417.0","Cluster 2","Elk3","false","false","","Unclustered","6.0","Clustered","7.0","ENSMUSG00000008398"
"1536","ARCHS4 Coexpression,530;Enrichr Queries,281;GTEx Coexpression,807","IFITM3,ANKRD35,NCF2,RAB3D,GFI1,CWH43,CLDN1,ETS1,IFIT3,IFIT2,LGALS3,PREX1,RGS2,CCND1,DPYSL2,MYC,CHEK2,MYB,TNFSF10,LIPK,TGM2,IER3,RNF43,RSAD2,IGFBP4,IGFBP3,IGFBP2,SYTL1,IFI27,KCNQ1,LGALS12,S100A6,RIN3,NUPR1,COL17A1,AKNA,CDCA7,CACNA1A,KLC3,GRK2,RDH12,STC2,WNT3,PRNP,EGR2,GSDMA,CADM1,UBE2C,VDR,ANKRD22,OSBPL2,NBEAL2,ISG15,ABCA7,POU2F3,PARP12,GADD45G,FOSL1,ISG20,CXCL10,EFNA3,GJB2,GJB3,LYPD6B,PPP1R1B,SP6,HPSE,FGFR3,ITM2C,CDKN1C,RET,DENND1C,BTG2,TNFAIP2,ATP2A3,HSPB1,ITGAL,LIMD2,LFNG,ADGRE5,SH3BGRL3,FFAR2,EMB,CD53,MYOF,GPBAR1,IL17RE,APBB1IP,FGR,HCK,GFOD1,IRF1,ALDH1A1,IRF7,TFF3,BIRC5,FBP1,HCST,PLCB2,SLC43A2,RGS14,RGS16,THBS1,AURKB,RASD1,SH3BP1,ALOX5,RNF39,LRIG1,RRM2,LAPTM5,KRT10,KLF4,FMNL1,TRIM35,FOSB,VIM,INSM1,YPEL3","569","539.3","Cluster 2","Ascl2","false","false","","Unclustered","2.896551724137931","Clustered","6.836363636363636","ENSMUSG00000009248"
"1531","","",,,"","Rundc3a","false","false","","Unclustered","4.800000000000001","Unclustered","5.6000000000000005","ENSMUSG00000006575"
"1530","","",,,"Cluster 2","Hap1","false","false","","Unclustered","5.0","Clustered","7.0","ENSMUSG00000006930"
"1527","","",,,"Cluster 1","Mfng","false","false","","Unclustered","6.0","Clustered","9.0","ENSMUSG00000018169"
"1525","","",,,"","Chtf18","false","false","","Unclustered","1.6666666666666667","Unclustered","1.6666666666666667","ENSMUSG00000019214"
"1524","","",,,"Cluster 2","Pcsk4","false","false","","Unclustered","4.464285714285714","Clustered","7.0","ENSMUSG00000020131"
"1522","","",,,"Cluster 1","Ddc","false","false","","Unclustered","8.0","Clustered","9.0","ENSMUSG00000020182"
"1519","","",,,"","Rsad2","false","false","","Unclustered","4.909090909090909","Unclustered","6.545454545454546","ENSMUSG00000020641"
"1518","","",,,"Cluster 2","Dapk1","false","false","","Unclustered","6.1090909090909085","Clustered","8.2","ENSMUSG00000021559"
"1516","","",,,"","B3gnt5","false","false","","Unclustered","3.0","Unclustered","5.0","ENSMUSG00000022686"
"1513","","",,,"Cluster 2","Slc17a9","false","false","","Unclustered","5.0","Clustered","7.0","ENSMUSG00000023393"
"1512","","",,,"Cluster 2","Fgd2","false","false","","Unclustered","8.0","Clustered","7.7727272727272725","ENSMUSG00000024013"
"1511","","",,,"Cluster 2","Abcg1","false","false","","Unclustered","6.0","Clustered","8.0","ENSMUSG00000024030"
"1509","","",,,"Cluster 2","Syvn1","false","false","","Unclustered","6.0","Clustered","8.0","ENSMUSG00000024807"
"1508","","",,,"","Gldc","false","false","","Unclustered","4.0","Unclustered","4.0","ENSMUSG00000024827"
"1507","","",,,"Cluster 2","Slc1a1","false","false","","Unclustered","5.785714285714286","Clustered","6.75","ENSMUSG00000024935"
"1506","","",,,"","Maged1","false","false","","Unclustered","4.761904761904762","Unclustered","5.7142857142857135","ENSMUSG00000025151"
"1505","","",,,"","Agap2","false","false","","Unclustered","2.4000000000000004","Unclustered","3.6","ENSMUSG00000025422"
"1503","","",,,"","Tyms","false","false","","Unclustered","3.7333333333333334","Unclustered","6.0","ENSMUSG00000025747"
"1500","","",,,"Cluster 2","Rassf5","false","false","","Unclustered","5.5","Clustered","7.333333333333333","ENSMUSG00000026430"
"1495","","",,,"Cluster 2","Hat1","false","false","","Unclustered","5.785714285714286","Clustered","7.619047619047619","ENSMUSG00000027018"
"1494","","",,,"Cluster 2","Gpcpd1","false","false","","Unclustered","4.0","Clustered","7.0","ENSMUSG00000027346"
"1490","","",,,"Cluster 1","Pkia","false","false","","Unclustered","6.236363636363636","Clustered","9.642857142857142","ENSMUSG00000027499"
"1488","","",,,"Cluster 2","Fggy","false","false","","Unclustered","5.785714285714286","Clustered","8.0","ENSMUSG00000028573"
"1485","","",,,"Cluster 2","Cdk14","false","false","","Unclustered","6.0","Clustered","7.0","ENSMUSG00000028926"
"1483","","",,,"","Hgfac","false","false","","Unclustered","4.0","Unclustered","5.0","ENSMUSG00000029102"
"1481","","",,,"Cluster 2","Mfsd7a","false","false","","Unclustered","4.761904761904762","Clustered","8.0","ENSMUSG00000029490"
"1480","","",,,"","Nova2","false","false","","Unclustered","5.785714285714286","Unclustered","5.7555555555555555","ENSMUSG00000030411"
"1478","","",,,"Cluster 2","Kif22","false","false","","Unclustered","3.7333333333333334","Clustered","7.0","ENSMUSG00000030677"
"1477","","",,,"Cluster 2","Ern2","false","false","","Unclustered","6.0","Clustered","7.0","ENSMUSG00000030866"
"1476","","",,,"","Pim2","false","false","","Unclustered","3.7333333333333334","Unclustered","4.666666666666667","ENSMUSG00000031155"
"1475","","",,,"Cluster 2","Adprhl1","false","false","","Unclustered","5.0","Clustered","7.0","ENSMUSG00000031448"
"1473","","",,,"Cluster 1","Ctrb1","false","false","","Unclustered","7.822222222222222","Clustered","8.799999999999999","ENSMUSG00000031957"
"1471","","",,,"","Irak1bp1","false","false","","Unclustered","4.761904761904762","Unclustered","5.142857142857142","ENSMUSG00000032251"
"1470","","",,,"","Zwilch","false","false","","Unclustered","0.4","Unclustered","0.4","ENSMUSG00000032400"
"1469","","",,,"Cluster 2","Mras","false","false","","Unclustered","6.0","Clustered","7.0","ENSMUSG00000032470"
"1468","","",,,"","Kif9","false","false","","Unclustered","5.0","Unclustered","3.9285714285714284","ENSMUSG00000032489"
"1467","","",,,"","Snx33","false","false","","Unclustered","4.166666666666667","Unclustered","6.533333333333333","ENSMUSG00000032733"
"1466","","",,,"Cluster 2","Mnd1","false","false","","Unclustered","5.571428571428571","Clustered","8.0","ENSMUSG00000033752"
"1462","","",,,"","Ncaph","false","false","","Unclustered","6.0","Unclustered","6.5","ENSMUSG00000034906"
"1461","","",,,"Cluster 1","Fam167a","false","false","","Unclustered","6.1090909090909085","Clustered","9.0","ENSMUSG00000035095"
"1460","","",,,"Cluster 2","Slc12a8","false","false","","Unclustered","5.0","Clustered","7.0","ENSMUSG00000035506"
"1459","","",,,"","Isg15","false","false","","Unclustered","5.0","Unclustered","5.428571428571429","ENSMUSG00000035692"
"1457","","",,,"Cluster 2","Palm","false","false","","Unclustered","5.0","Clustered","7.0","ENSMUSG00000035863"
"1456","","",,,"Cluster 2","Ints6l","false","false","","Unclustered","5.0","Clustered","7.0","ENSMUSG00000035967"
"1454","","",,,"Cluster 2","Prodh2","false","false","","Unclustered","4.166666666666667","Clustered","7.0","ENSMUSG00000036892"
"1453","","",,,"","Gpr162","false","false","","Unclustered","4.0","Unclustered","5.0","ENSMUSG00000038390"
"1452","ARCHS4 Coexpression,463;Enrichr Queries,516;GTEx Coexpression,432","SEMA5A,RAB3B,OLFML2B,CHPF,GXYLT2,ETS1,ALDH1L2,TMEM263,IGF1R,ELK3,SCGN,RPS6KA6,RGS2,CCND1,DPYSL2,MYC,CREB3L1,LONP1,CAPN2,TGM2,IER3,CHGB,PDIA3,IL1R1,IGFBP4,IGFBP3,ZBTB38,ACSL6,ARID5B,P3H3,HSPG2,DCTD,ADAM19,FNDC1,MAP1B,SCG5,MXRA7,NOTCH2,FAM114A1,SDC4,GLIS3,ZFP36L2,CNN3,GOLGA7B,PDGFC,NPHP3,IGFBP7,ST3GAL1,PRNP,TGFB2,ATP8B2,HSPA5,CAV2,CRIM1,SSC5D,DAP,CDK6,DNAJC10,MAGED2,RGL3,FAT4,CALR,SLC26A4,PAM,C2CD2L,ITM2C,COL18A1,NRP1,PCSK1,WDR47,BTG2,HSPB1,PTPRM,ARHGAP6,RND3,HERPUD1,SH3PXD2A,TIMP2,TIMP3,EMILIN1,SCARF2,DST,GPX3,ABCC8,MYOF,CKAP4,B3GNT9,ASPH,IMPAD1,PLSCR4,CDC42EP3,MAPRE3,MGLL,ITGA9,CD63,LAMA4,FAM129A,SNX33,THBS1,AURKB,SLC7A2,ABLIM1,NT5E,LRIG1,GSN,GCG,LHFPL2,KLF4,SORL1,FAM167A,NFIB,CCDC8,FOSB,VIM,SEC24D","448","470.3","","Creb3l2","false","false","","Unclustered","6.0","Unclustered","6.027777777777779","ENSMUSG00000038648"
"1451","","",,,"Cluster 2","Tnfsf10","false","false","","Unclustered","5.5","Clustered","7.333333333333333","ENSMUSG00000039304"
"1447","","",,,"Cluster 2","Disp2","false","false","","Unclustered","5.0","Clustered","7.0","ENSMUSG00000040035"
"1446","","",,,"Cluster 2","Plppr2","false","false","","Unclustered","5.0","Clustered","7.0","ENSMUSG00000040563"
"1445","","",,,"","Sh3kbp1","false","false","","Unclustered","3.142857142857143","Unclustered","4.285714285714286","ENSMUSG00000040990"
"1444","","",,,"Cluster 2","Mdfic","false","false","","Unclustered","5.5","Clustered","8.0","ENSMUSG00000041390"
"1443","","",,,"Cluster 1","Eml6","false","false","","Unclustered","5.3076923076923075","Clustered","10.0","ENSMUSG00000044072"
"1442","","",,,"Cluster 2","Ackr3","false","false","","Unclustered","6.0","Clustered","7.0","ENSMUSG00000044337"
"1441","","",,,"","Phlpp1","false","false","","Unclustered","4.464285714285714","Unclustered","6.25","ENSMUSG00000044340"
"1440","","",,,"Cluster 2","Serpinb1a","false","false","","Unclustered","5.0","Clustered","7.0","ENSMUSG00000044734"
"1439","","",,,"Cluster 1","Sstr3","false","false","","Unclustered","5.2","Clustered","9.0","ENSMUSG00000044933"
"1437","","",,,"Cluster 1","Smtnl2","false","false","","Unclustered","8.0","Clustered","9.0","ENSMUSG00000045667"
"1435","","",,,"Cluster 2","Cldn2","false","false","","Unclustered","4.761904761904762","Clustered","7.0","ENSMUSG00000047230"
"1433","","",,,"Cluster 1","Gpr55","false","false","","Unclustered","5.333333333333333","Clustered","9.0","ENSMUSG00000049608"
"1431","","",,,"Cluster 1","Suox","false","false","","Unclustered","8.0","Clustered","10.0","ENSMUSG00000049858"
"1429","","",,,"Cluster 2","Rgs13","false","false","","Unclustered","6.0","Clustered","7.0","ENSMUSG00000051079"
"1428","","",,,"","Plekhm3","false","false","","Unclustered","2.7","Unclustered","4.0","ENSMUSG00000051344"
"1427","","",,,"","Ncald","false","false","","Unclustered","4.761904761904762","Unclustered","5.7142857142857135","ENSMUSG00000051359"
"1426","","",,,"Cluster 1","Lipg","false","false","","Unclustered","7.5636363636363635","Clustered","8.50909090909091","ENSMUSG00000053846"
"1425","","",,,"Cluster 2","Slc8a1","false","false","","Unclustered","4.166666666666667","Clustered","7.0","ENSMUSG00000054640"
"1424","","",,,"","Map6","false","false","","Unclustered","3.0","Unclustered","3.0","ENSMUSG00000055407"
"1423","","",,,"Cluster 1","Rad51b","false","false","","Unclustered","6.0","Clustered","9.0","ENSMUSG00000059060"
"1422","","",,,"","Fxyd2","false","false","","Unclustered","5.0","Unclustered","5.0","ENSMUSG00000059412"
"1420","","",,,"Cluster 1","Stx17","false","false","","Unclustered","6.0","Clustered","9.0","ENSMUSG00000061455"
"1418","","",,,"Cluster 2","Fxyd6","false","false","","Unclustered","5.785714285714286","Clustered","6.75","ENSMUSG00000066705"
"1417","","",,,"","Cenpm","false","false","","Unclustered","5.0","Unclustered","6.0","ENSMUSG00000068101"
"1415","ARCHS4 Coexpression,1534;Enrichr Queries,669;GTEx Coexpression,944","FOXA1,COL18A1,BTG2,CD83,DIXDC1,RORA,FRY,NR3C1,ETS1,RND3,IGF1R,ZC3H12C,RGS2,DUSP10,GM2A,CCND1,DPYSL2,MYC,GJA4,LONP1,GRB10,TIMP3,SH3BGRL3,DACT1,IER3,MYLIP,EPHA4,KLF12,MBNL1,DST,TRPC1,ARID5B,ZDHHC15,SETBP1,SAPCD2,MAP1B,IRF1,PLSCR4,CDC42EP3,LCOR,TRABD2B,MCM2,RNF180,PELI2,FAM129A,ZDHHC21,THBS1,AURKB,ZFP36L2,BCL2L11,GRK5,SH3BP1,LRIG1,IGFBP7,CEP192,ST3GAL1,RUNX1T1,PRNP,EGR2,CBX5,RBPMS,ATP8B2,CRIM1,RAB27B,NBEAL2,FBXO32,KLF4,SORL1,GADD45G,SMOC2,CXCL10,CDK6,NR4A3,NFIB,ALMS1,ID4,FOSB,AMOTL2,VIM,FERMT2,FRYL,ITM2C","1236","1049.0","Cluster 1","Zbtb10","false","false","","Unclustered","5.7272727272727275","Clustered","8.678571428571429","ENSMUSG00000069114"
"1414","","",,,"","Gpr179","false","false","","Unclustered","4.0","Unclustered","4.0","ENSMUSG00000070337"
"1412","","",,,"","Tmem28","false","false","","Unclustered","2.7","Unclustered","4.0","ENSMUSG00000071719"
"1411","","",,,"Cluster 1","Ccnf","false","false","","Unclustered","7.822222222222222","Clustered","8.799999999999999","ENSMUSG00000072082"
"1405","","",,,"Cluster 1","Gm7325","false","false","","Unclustered","5.9818181818181815","Clustered","9.0","ENSMUSG00000079471"
"1402","","",,,"Cluster 2","Tex9","false","false","","Unclustered","5.785714285714286","Clustered","8.0","ENSMUSG00000090626"
"1400","","",,,"Cluster 2","Syne1","false","false","","Unclustered","6.0","Clustered","7.0","ENSMUSG00000096054"
"1398","","",,,"","Rgs4","false","false","","Unclustered","4.761904761904762","Unclustered","5.7142857142857135","ENSMUSG00000038530"
"1397","","",,,"","Calcrl","false","false","","Unclustered","3.4285714285714284","Unclustered","6.0","ENSMUSG00000059588"
"1396","ARCHS4 Coexpression,626;Enrichr Queries,497;ReMap ChIP-seq,53;GTEx Coexpression,800","RAB3B,FOXA1,CWH43,MKI67,CLDN1,IFIT3,LGALS3,RGS2,CCND1,LIPH,MYC,CHEK2,MYB,TNFSF10,CAPN2,TNS4,TGM2,IER3,MREG,IGFBP3,ARID5B,SDCBP2,OVOL2,CLDN4,IFI27,CLDN8,SCNN1A,HOXB4,S100A6,MAL,HOXB3,NUPR1,HOXB8,PADI1,COL17A1,SDC4,FUT2,NEUROD2,S100A14,TSPAN1,ZBTB7C,PRNP,GSDMA,ARHGEF37,NEBL,PMM2,RAB27B,FBXO32,FER1L6,TPX2,CXCL10,GJB2,GCLC,RAET1E,AKR1B10,FXYD3,GJB3,PPP1R1B,MYO5C,SDC1,SPRR1A,LRP11,ECM1,BTG2,CCDC120,TNFAIP2,TFCP2L1,SDR16C5,MFSD6,TMED3,TIMP3,PLEKHN1,FGFBP1,MMP7,GPX3,MYOF,PLAUR,DYNAP,ADGRF1,ESPL1,RHOV,CHST4,MGLL,FAM129A,ATP2C2,THBS1,THSD4,AURKB,ABLIM1,NT5E,AGR2,LRIG1,RNF39,MPZL2,SLC12A2,RRM2,GSN,CYP4B1,KLF4,SORL1,MAB21L3,TTC9,CYP2W1,TSPAN13,MLPH,FABP5,NFIB,KRT15,FAM131A,VIM","502","494.0","","Ehf","false","false","","Unclustered","3.8306878306878307","Unclustered","3.8306878306878307","ENSMUSG00000012350"
"1394","","",,,"","Runx1t1","false","false","","Unclustered","6.0","Unclustered","6.5","ENSMUSG00000006586"
"1392","","",,,"Cluster 1","Etnppl","false","false","","Unclustered","5.785714285714286","Clustered","9.0","ENSMUSG00000019232"
"1391","","",,,"Cluster 1","Igfbp3","false","false","","Unclustered","6.0","Clustered","9.0","ENSMUSG00000020427"
"1389","ARCHS4 Coexpression,269;Enrichr Queries,859;GTEx Coexpression,184","RAB3B,FOXA1,RAB3C,GFI1,DACH2,SCGN,KIF5C,BASP1,DPYSL2,DPYSL3,STMN1,HOXA4,UNC5A,IGFBP2,TMEM130,ISL1,OLFM1,PLPP4,ZFP41,LMX1A,MAP1B,LGALS12,HOXB3,HOXB2,LMX1B,HOXB8,SCG2,TSPYL4,BEX2,BRSK2,CACNA1A,C2CD4C,NREP,NEUROD1,NEUROD2,MAP2,NHLH1,SARAF,MAP6,NPTX1,NXPH1,NPTX2,TAC1,SCN3B,SCN3A,MAP9,KLHL29,EGR2,DTNA,MAGEE1,BDNF,ESRRG,ST18,REEP1,XKR9,H2AFY2,KLHDC8A,LHX1,PKIA,ID4,LRRN1,XKR4,CNIH2,FGFR3,CD200,GPR27,PCSK1,NRP2,ONECUT3,PTPRN,CELF5,CELF6,RND3,HPF1,TUBA1A,MECOM,SLC22A17,DNER,GDAP1L1,TRIM67,TRPC7,APC2,PIANP,TMED8,PEG3,TPSG1,PAX6,SYP,MANEAL,PROX1,IMPACT,TUBB2A,NR5A2,VGF,KCNMA1,MAPRE3,HAP1,HCN4,MAGEH1,CRMP1,HOXD13,CXXC4,HSPA13,AURKB,GNG2,SV2A,GNG4,SLIT1,MSX1,SLIT2,APBB1,PAK3,CCDC184,ATOH1,RUNX1T1,PCDH8,IRX4,SYT13,PNMA2,POU4F1,DLK1,KBTBD6,MORN4,GSTA4,SST,NFIB,NOVA2,APBA1,INSM1","401","437.3","Cluster 1","Otp","false","false","","Unclustered","5.9393939393939394","Clustered","8.4","ENSMUSG00000021685"
"1388","","",,,"","Dscc1","false","false","","Unclustered","6.0","Unclustered","6.5","ENSMUSG00000022422"
"1386","","",,,"Cluster 1","Fhl1","false","false","","Unclustered","6.0","Clustered","9.0","ENSMUSG00000023092"
"1382","","",,,"","Rgs7","false","false","","Unclustered","5.0","Unclustered","7.0","ENSMUSG00000026527"
"1381","","",,,"","Grin1","false","false","","Unclustered","3.7333333333333334","Unclustered","3.7333333333333334","ENSMUSG00000026959"
"1380","","",,,"","Edn3","false","false","","Unclustered","4.0","Unclustered","5.0","ENSMUSG00000027524"
"1377","","",,,"Cluster 2","Cenpn","false","false","","Unclustered","6.0","Clustered","8.0","ENSMUSG00000031756"
"1376","","",,,"","Dnaja4","false","false","","Unclustered","5.333333333333333","Unclustered","6.222222222222221","ENSMUSG00000032285"
"1373","","",,,"Cluster 2","Ptprm","false","false","","Unclustered","5.785714285714286","Clustered","6.75","ENSMUSG00000033278"
"1370","","",,,"Cluster 1","Lhfpl2","false","false","","Unclustered","6.0","Clustered","9.0","ENSMUSG00000045312"
"1367","","",,,"Cluster 1","Cemip","false","false","","Unclustered","5.9393939393939394","Clustered","8.4","ENSMUSG00000052353"
"1366","","",,,"Cluster 2","Soga1","false","false","","Unclustered","6.377777777777777","Clustered","7.288888888888889","ENSMUSG00000055485"
"1365","","",,,"","Tmem178b","false","false","","Unclustered","3.7333333333333334","Unclustered","4.666666666666667","ENSMUSG00000057716"
"1364","","",,,"","Slc38a11","false","false","","Unclustered","0.0","Unclustered","0.0","ENSMUSG00000061171"
"1357","","",,,"","Kcnb2","false","false","","Unclustered","3.333333333333333","Unclustered","4.533333333333333","ENSMUSG00000092083"
"1355","ARCHS4 Coexpression,80;Enrichr Queries,67;GTEx Coexpression,82","ERCC6L,IRS1,BUB1B,MKI67,ALDH1L2,ETS1,SMC4,SMC2,IGF1R,CDC20,RGS2,CCND1,CDH2,DPYSL2,MYC,CHEK2,CHEK1,DPYSL3,STMN1,GRB10,FBXO5,GTSE1,TGM2,IER3,IGFBP4,IGFBP3,P3H1,P3H3,PDIA6,ADAM19,NEIL3,MELK,CCNE2,SMO,MAP1B,ADAM12,KDELR3,KIF20B,PRR11,MYL9,NCAPG,STC1,SKA3,IQGAP3,SKA1,CNN3,CCNB2,CCNB1,PODXL,STC2,PDGFC,CLSPN,ECT2,SRGAP1,MYH10,PRNP,TGFB2,CBX5,CADM1,UBE2C,BDNF,FZD7,PLK1,HMGA1,CRIM1,ARHGAP29,FANCB,CDC6,SMARCA1,FOSL1,BMP4,TPX2,ANLN,DIAPH3,CDK6,NASP,CDK1,AMOTL2,LRRN1,ULBP1,FERMT2,TOP2A,NRP1,COL18A1,TENM3,DOCK8,NCAPG2,KIF14,HMGB2,MCM10,KIF11,FOXM1,RND3,LMNB1,MECOM,EXO1,TIMP2,PBK,TIMP3,MYBL2,SPDL1,TK1,CEP55,CD53,HELLS,ARHGEF15,MYOF,CKAP2,PLAUR,KIF23,ETV1,IL17RD,ETV4,CKAP4,CCNA2,ASPM,RCN1,KIFC1,MCM3,BIRC5,KIF2C,ITGA5,DOCK2,GART,DTL,DBN1,VGLL3,DTYMK,UHRF1,CCDC69,CENPA,THBS1,AURKB,AURKA,CECR2,NT5E,NT5DC2,LRIG1,CHML,SLIT2,BUB1,E2F7,GINS1,RRM2,SLC16A1,TRPA1,TPBG,LAPTM5,NAP1L1,KLF4,CENPE,CENPF,TMEM158,CENPI,PRC1,NFIB,CACHD1,TRIP13,VIM,KCNK2,SPC24","26","76.33","Cluster 1","Hmga2","false","false","","Unclustered","6.236363636363636","Clustered","8.4","ENSMUSG00000056758"
"1353","","",,,"","Mmp7","false","false","","Unclustered","0.0","Unclustered","0.0","ENSMUSG00000018623"
"1351","","",,,"Cluster 1","Itgb7","false","false","","Unclustered","5.785714285714286","Clustered","10.0","ENSMUSG00000001281"
"1349","","",,,"","Dennd1c","false","false","","Unclustered","4.0","Unclustered","6.0","ENSMUSG00000002668"
"1348","","",,,"Cluster 2","Grk5","false","false","","Unclustered","5.785714285714286","Clustered","8.0","ENSMUSG00000003228"
"1346","","",,,"Cluster 1","Ier3","false","false","","Unclustered","5.9393939393939394","Clustered","10.0","ENSMUSG00000003541"
"1343","","",,,"Cluster 2","Reep5","false","false","","Unclustered","6.133333333333334","Clustered","7.279411764705882","ENSMUSG00000005873"
"1342","","",,,"Cluster 2","Cryba2","false","false","","Unclustered","6.0","Clustered","8.0","ENSMUSG00000006546"
"1341","","",,,"Cluster 1","Derl3","false","false","","Unclustered","8.0","Clustered","9.642857142857142","ENSMUSG00000009092"
"1339","","",,,"","Trpm5","false","false","","Unclustered","4.166666666666667","Unclustered","5.833333333333334","ENSMUSG00000009246"
"1338","","",,,"","Scarf2","false","false","","Unclustered","3.7333333333333334","Unclustered","4.666666666666667","ENSMUSG00000012017"
"1334","","",,,"Cluster 1","1700016C15Rik","false","false","","Unclustered","8.0","Clustered","10.0","ENSMUSG00000015962"
"1332","","",,,"Cluster 2","Sdc4","false","false","","Unclustered","4.166666666666667","Clustered","8.0","ENSMUSG00000017009"
"1331","","",,,"","Il13ra1","false","false","","Unclustered","5.5","Unclustered","6.416666666666666","ENSMUSG00000017057"
"1330","","",,,"Cluster 1","Rnd3","false","false","","Unclustered","6.1090909090909085","Clustered","10.0","ENSMUSG00000017144"
"1329","","",,,"Cluster 4","Sgk2","false","false","","Unclustered","4.464285714285714","Clustered","6.25","ENSMUSG00000017868"
"1328","","",,,"Cluster 1","Wif1","false","false","","Unclustered","8.672727272727272","Clustered","10.166666666666666","ENSMUSG00000020218"
"1326","","",,,"","Abca8b","false","false","","Unclustered","5.0","Unclustered","7.0","ENSMUSG00000020620"
"1325","","",,,"Cluster 2","Vash1","false","false","","Unclustered","5.5","Clustered","8.0","ENSMUSG00000021256"
"1322","","",,,"Cluster 1","Pcsk1","false","false","","Unclustered","6.0","Clustered","10.0","ENSMUSG00000021587"
"1320","","",,,"Cluster 1","Jph4","false","false","","Unclustered","7.5636363636363635","Clustered","8.93939393939394","ENSMUSG00000022208"
"1319","","",,,"","Map3k12","false","false","","Unclustered","4.0","Unclustered","7.0","ENSMUSG00000023050"
"1318","","",,,"Cluster 2","Celsr3","false","false","","Unclustered","5.785714285714286","Clustered","8.0","ENSMUSG00000023473"
"1317","","",,,"","Agpat4","false","false","","Unclustered","2.1999999999999997","Unclustered","5.0","ENSMUSG00000023827"
"1316","","",,,"","Pkmyt1","false","false","","Unclustered","5.571428571428571","Unclustered","6.027777777777779","ENSMUSG00000023908"
"1313","","",,,"Cluster 2","Cyb5a","false","false","","Unclustered","4.783333333333333","Clustered","6.725274725274725","ENSMUSG00000024646"
"1312","","",,,"Cluster 2","Il33","false","false","","Unclustered","5.2","Clustered","7.333333333333333","ENSMUSG00000024810"
"1311","","",,,"Cluster 1","Peli3","false","false","","Unclustered","8.0","Clustered","10.0","ENSMUSG00000024901"
"1309","","",,,"Cluster 2","Ifitm3","false","false","","Unclustered","4.464285714285714","Clustered","7.0","ENSMUSG00000025492"
"1308","","",,,"Cluster 2","Pidd1","false","false","","Unclustered","4.761904761904762","Clustered","7.0","ENSMUSG00000025507"
"1306","","",,,"","Il18rap","false","false","","Unclustered","3.7333333333333334","Unclustered","6.0","ENSMUSG00000026068"
"1302","","",,,"","Frmd4a","false","false","","Unclustered","5.0","Unclustered","7.0","ENSMUSG00000026657"
"1298","","",,,"","Mal","false","false","","Unclustered","5.0","Unclustered","8.0","ENSMUSG00000027375"
"1294","ARCHS4 Coexpression,478;Enrichr Queries,43;GTEx Coexpression,832","FOXA1,EHF,CPNE4,RAB3D,MKI67,HID1,CDC20,RGS2,CCND1,CREB3L1,DPYSL2,MYC,CHEK2,MYB,STMN1,CHEK1,IER3,KCNH6,IGFBP2,SYTL1,OVOL2,SYTL2,DKK3,VMAC,PLPP5,MELK,CLDN8,LGALS12,S100A6,NUPR1,ASF1B,CDCA7,NCAPG,PKMYT1,RAP1GAP,CCNB2,ALDH3B2,CRACR2A,CCNB1,CRACR2B,KCNN4,ECT2,FAM83D,TSPAN1,PRNP,UBE2C,PLK1,ISG15,INHBB,CDC6,FBXO32,GADD45G,ISG20,FAM111A,CXCL10,EFNA3,FXYD3,BAMBI,UBE2T,RCAN3,MYO5C,CDK1,ITM2C,TOP2A,BTG2,ICA1,ATP2A3,HMGB2,HSPB1,MIA3,SYNE4,ABCC12,HERPUD1,LMNB1,IMPA2,NUF2,TMED3,PBK,IDS,EFHD1,MYBL2,TK1,CEP55,BCAS1,HIST1H1C,SMIM14,RMI2,SLC2A10,TBC1D8,EMP2,CCNA2,BACE2,ASPM,SAPCD2,RASA3,KIT,CKS2,IRF7,TFF3,BIRC5,FBP1,DTL,SLC29A2,UHRF1,FAM129A,ATP2C2,TYMS,CENPA,THBS1,FAM214A,AURKB,AURKA,UNG,PDE11A,SLC25A29,AGR2,LRIG1,SPTSSB,SPDEF,LRRC26,RRM2,GSN,TPD52L1,KLF4,SORL1,TTC39A,CENPF,MLPH,TSPAN13,PIK3IP1,PRC1,SGSM3,CENPN,TRIM37,COQ8A,VIM,CCL28,YPEL3,CDKN3","418","451.0","","Creb3l4","false","false","","Unclustered","7.0","Unclustered","8.0","ENSMUSG00000027938"
"1293","","",,,"","Rit1","false","false","","Unclustered","6.0","Unclustered","8.0","ENSMUSG00000028057"
"1290","","",,,"Cluster 2","Cdkn2c","false","false","","Unclustered","4.761904761904762","Clustered","8.0","ENSMUSG00000028551"
"1289","","",,,"","Pla2g2f","false","false","","Unclustered","6.0","Unclustered","8.0","ENSMUSG00000028749"
"1286","","",,,"Cluster 2","Rassf6","false","false","","Unclustered","5.2","Clustered","7.333333333333333","ENSMUSG00000029370"
"1285","","",,,"","Oasl2","false","false","","Unclustered","6.0","Unclustered","8.0","ENSMUSG00000029561"
"1284","ARCHS4 Coexpression,1226;Enrichr Queries,37;GTEx Coexpression,358","GALNT12,RAB3B,FOXA1,SH2D7,ANKLE1,FRMPD1,GFI1,AVIL,ETS1,SLC8A1,IGF1R,LGALS3,SCGN,RGS2,CDH2,KIF5C,MYC,CHEK2,MYB,RASSF6,SH2D6,CHGB,SPINK4,CASR,CHRNB4,ENTPD3,VWA5B2,MUC3A,ISL1,DISP2,ERN2,RAB30,CLDN4,RFX6,LMX1A,LGALS12,SCG5,ZG16,SCG2,CFTR,TPH1,SLC35D3,CACNA1A,FBXO48,SLC38A11,TNFRSF11A,CACNA1C,PKMYT1,CNN3,NEUROD1,TRPM2,NEUROD2,KLC3,SCIN,NLRP6,GALR1,CLCA1,TRPM5,PCK1,TAC1,TSPAN1,SCN3A,WNT3,ST3GAL2,NXNL2,PRNP,EGR2,SLC14A2,CADM1,VDR,BDNF,REG4,SLC16A12,TRPV3,ESRRG,B3GALT5,ST18,PYY,CXCL10,PLCXD3,TH,FXYD3,FEV,PDE3A,CPE,CNIH2,SLC26A4,SNAP25,PCSK1,TENM4,PTPRN,KRT20,FOXM1,UNC80,C1QTNF1,MECOM,NEFM,GAST,GAL3ST2,APOBEC1,LEFTY1,APOBEC2,TPSG1,ARHGEF15,IZUMO1,URAD,ETV1,PAX6,PROX1,DYNAP,B3GNT6,IRF1,TFF3,CDHR5,DDC,REP15,RGS16,PRUNE2,ZDHHC23,CRYBA2,HSD17B13,ATP2C2,ASCL2,CXXC4,AURKB,MUC2,RASD1,GNG4,HSD17B2,LRIG1,GCNT3,ATOH1,SPDEF,RUNX1T1,CHGA,R3HDML,KCNJ5,KCNB1,CADPS,LHFPL5,GUCA2B,GCG,KLF4,TTC39A,GUCA2A,DLK1,MGAT4C,SST,INSM1,TRIM31,FRYL,FOXA3,NEUROG3","572","540.3","Cluster 1","Pax4","false","false","","Unclustered","6.377777777777777","Clustered","9.0","ENSMUSG00000029706"
"1283","","",,,"Cluster 1","Hpgds","false","false","","Unclustered","6.0","Clustered","10.0","ENSMUSG00000029919"
"1280","","",,,"","Pzp","false","false","","Unclustered","4.761904761904762","Unclustered","8.0","ENSMUSG00000030359"
"1279","","",,,"Cluster 2","Nupr1","false","false","","Unclustered","5.7272727272727275","Clustered","8.2","ENSMUSG00000030717"
"1278","","",,,"","Otc","false","false","","Unclustered","3.7333333333333334","Unclustered","7.0","ENSMUSG00000031173"
"1277","","",,,"","Dkc1","false","false","","Unclustered","5.0","Unclustered","8.0","ENSMUSG00000031403"
"1276","","",,,"Cluster 1","Gas6","false","false","","Unclustered","9.0","Clustered","10.0","ENSMUSG00000031451"
"1274","","",,,"","Oas3","false","false","","Unclustered","3.0","Unclustered","3.0","ENSMUSG00000032661"
"1273","","",,,"","Trpc1","false","false","","Unclustered","4.0","Unclustered","7.0","ENSMUSG00000032839"
"1271","","",,,"","Smc4","false","false","","Unclustered","1.6666666666666667","Unclustered","3.0","ENSMUSG00000034349"
"1270","","",,,"","Cxcl10","false","false","","Unclustered","0.0","Unclustered","0.0","ENSMUSG00000034855"
"1263","","",,,"","Apbb1","false","false","","Unclustered","2.7","Unclustered","4.0","ENSMUSG00000037032"
"1262","","",,,"","Endod1","false","false","","Unclustered","5.0","Unclustered","6.0","ENSMUSG00000037419"
"1261","ARCHS4 Coexpression,454;Enrichr Queries,525;GTEx Coexpression,595","SEMA5A,IFITM3,CD83,NRROS,PROS1,MKI67,ETS1,IFIT3,IFIT2,RGS4,SLC25A48,LGALS3,RGS2,CCND1,BASP1,CHEK2,DPYSL2,MYC,SLCO2B1,LONP1,THSD7A,PHLDA3,TGM2,IER3,GAS2L3,POSTN,RSAD2,IL1R1,IGFBP4,IGFBP3,ARID5A,VASH1,MAPK8IP1,PLA2G15,S100A6,RIN3,NUPR1,CSF1R,SEMA7A,SDC4,ARHGAP19,LPL,PLA2G7,PIK3R5,IGSF21,TRPM2,SCIN,INPP5D,HIVEP3,NGFR,PRNP,ARHGEF37,BDNF,TRPV3,ISG15,GADD45G,FOSL1,CXCL10,PTPRE,RGCC,NR4A3,RGL1,ITM2C,TOP2A,PTPRU,NRP1,BTG2,GRIK3,TNFAIP2,RND3,DUSP10,SH3PXD2A,FFAR4,TIMP3,TNFAIP8L3,A4GALT,DACT1,CD53,FOXD2,TGIF2,PLAUR,SERPINB9,GFRA3,APBB1IP,IRF1,B3GNT5,PLSCR4,ALDH1A1,IRF7,ATP6V1B2,ITGA5,C1QA,RGS16,PAPLN,NPL,ADD3,THBS1,AURKB,RASD1,CHSY1,KLRG2,LRIG1,IL33,GSN,RRM2,SLC31A2,LAPTM5,CYP4B1,LHFPL2,KLF4,LYVE1,FMNL3,ADGRD1,CYP2W1,P2RX4,ALOX5AP,FOSB,VIM,CDO1,RAMP1","548","524.7","Cluster 3","Egr2","false","false","","Unclustered","4.865882352941177","Clustered","12.142857142857142","ENSMUSG00000037868"
"1260","","",,,"","Rmi2","false","false","","Unclustered","5.0","Unclustered","8.0","ENSMUSG00000037991"
"1259","","",,,"","Spag4","false","false","","Unclustered","4.0","Unclustered","6.0","ENSMUSG00000038180"
"1258","","",,,"Cluster 1","Olfml2b","false","false","","Unclustered","7.644444444444445","Clustered","10.0","ENSMUSG00000038463"
"1256","","",,,"Cluster 1","Sct","false","false","","Unclustered","6.377777777777777","Clustered","10.0","ENSMUSG00000038580"
"1255","","",,,"Cluster 1","Capn8","false","false","","Unclustered","8.318181818181818","Clustered","9.307692307692308","ENSMUSG00000038599"
"1253","","",,,"Cluster 2","Sema6c","false","false","","Unclustered","6.0","Clustered","8.0","ENSMUSG00000038777"
"1251","","",,,"","Cbln3","false","false","","Unclustered","2.7","Unclustered","5.0","ENSMUSG00000040380"
"1250","","",,,"","Milr1","false","false","","Unclustered","6.0","Unclustered","6.0","ENSMUSG00000040528"
"1249","","",,,"","Plekhg1","false","false","","Unclustered","6.0","Unclustered","8.0","ENSMUSG00000040624"
"1246","","",,,"Cluster 2","Mfsd6","false","false","","Unclustered","5.5","Clustered","7.333333333333333","ENSMUSG00000041439"
"1245","","",,,"","Mcm3","false","false","","Unclustered","3.7333333333333334","Unclustered","6.0","ENSMUSG00000041859"
"1243","","",,,"","Fam227a","false","false","","Unclustered","5.571428571428571","Unclustered","6.027777777777779","ENSMUSG00000042564"
"1241","","",,,"","Leng9","false","false","","Unclustered","2.0","Unclustered","3.0","ENSMUSG00000043432"
"1240","","",,,"Cluster 2","Slc36a4","false","false","","Unclustered","6.377777777777777","Clustered","6.836363636363636","ENSMUSG00000043885"
"1238","","",,,"Cluster 2","Gpr4","false","false","","Unclustered","6.0","Clustered","8.0","ENSMUSG00000044317"
"1236","","",,,"Cluster 1","Arhgef37","false","false","","Unclustered","8.0","Clustered","10.0","ENSMUSG00000045094"
"1235","","",,,"Cluster 2","Cenpe","false","false","","Unclustered","5.333333333333333","Clustered","8.0","ENSMUSG00000045328"
"1233","","",,,"","Serpinb9","false","false","","Unclustered","2.7","Unclustered","4.0","ENSMUSG00000045827"
"1228","","",,,"Cluster 1","Tmem229a","false","false","","Unclustered","5.785714285714286","Clustered","9.0","ENSMUSG00000048022"
"1227","","",,,"","Gpr85","false","false","","Unclustered","4.761904761904762","Unclustered","7.0","ENSMUSG00000048216"
"1226","","",,,"Cluster 1","Mfsd6l","false","false","","Unclustered","8.0","Clustered","10.0","ENSMUSG00000048329"
"1225","","",,,"","Fgfbp1","false","false","","Unclustered","5.333333333333333","Unclustered","6.222222222222221","ENSMUSG00000048373"
"1224","","",,,"","Myof","false","false","","Unclustered","6.0","Unclustered","8.0","ENSMUSG00000048612"
"1223","","",,,"Cluster 2","Prss50","false","false","","Unclustered","4.0","Clustered","7.0","ENSMUSG00000048752"
"1222","","",,,"","Scn3b","false","false","","Unclustered","4.761904761904762","Unclustered","5.7142857142857135","ENSMUSG00000049281"
"1221","","",,,"Cluster 1","Sorl1","false","false","","Unclustered","9.0","Clustered","10.0","ENSMUSG00000049313"
"1219","","",,,"Cluster 1","Ccdc69","false","false","","Unclustered","7.5636363636363635","Clustered","8.93939393939394","ENSMUSG00000049588"
"1216","","",,,"","Ces2b","false","false","","Unclustered","4.761904761904762","Unclustered","6.0","ENSMUSG00000050097"
"1215","","",,,"","Sh2d6","false","false","","Unclustered","4.464285714285714","Unclustered","8.0","ENSMUSG00000052631"
"1214","","",,,"","Gm609","false","false","","Unclustered","3.7333333333333334","Unclustered","4.666666666666667","ENSMUSG00000053182"
"1213","","",,,"Cluster 2","Sh3pxd2a","false","false","","Unclustered","5.9393939393939394","Clustered","7.636363636363637","ENSMUSG00000053617"
"1211","","",,,"Cluster 1","Cldn23","false","false","","Unclustered","5.785714285714286","Clustered","10.0","ENSMUSG00000055976"
"1210","","",,,"","Zfp658","false","false","","Unclustered","2.0","Unclustered","3.0","ENSMUSG00000056592"
"1208","","",,,"Cluster 1","Tubb2a","false","false","","Unclustered","6.236363636363636","Clustered","10.0","ENSMUSG00000058672"
"1207","","",,,"","Sntb1","false","false","","Unclustered","5.785714285714286","Unclustered","8.0","ENSMUSG00000060429"
"1204","","",,,"Cluster 2","Lilrb4a","false","false","","Unclustered","5.5","Clustered","7.619047619047619","ENSMUSG00000062593"
"1203","","",,,"","Trim38","false","false","","Unclustered","5.571428571428571","Unclustered","8.0","ENSMUSG00000064140"
"1200","","",,,"","Ifit1bl2","false","false","","Unclustered","3.0","Unclustered","3.0","ENSMUSG00000067297"
"1198","","",,,"","Zfp72","false","false","","Unclustered","5.0","Unclustered","6.0","ENSMUSG00000069184"
"1196","","",,,"Cluster 2","Slfn9","false","false","","Unclustered","6.0","Clustered","8.0","ENSMUSG00000069793"
"1194","","",,,"Cluster 2","1700029J07Rik","false","false","","Unclustered","6.0","Clustered","8.0","ENSMUSG00000071103"
"1193","","",,,"","Naip5","false","false","","Unclustered","5.0","Unclustered","7.0","ENSMUSG00000071203"
"1192","","",,,"Cluster 1","Klrg2","false","false","","Unclustered","7.5636363636363635","Clustered","9.454545454545455","ENSMUSG00000071537"
"1191","","",,,"Cluster 1","Ccdc160","false","false","","Unclustered","5.785714285714286","Clustered","10.0","ENSMUSG00000073207"
"1190","","",,,"Cluster 1","Tnfaip8l3","false","false","","Unclustered","5.9393939393939394","Clustered","10.0","ENSMUSG00000074345"
"1185","","",,,"","Gm17555","false","false","","Unclustered","4.0","Unclustered","6.0","ENSMUSG00000090353"
"1184","","",,,"Cluster 2","Ace3","false","false","","Unclustered","6.0","Clustered","8.0","ENSMUSG00000101605"
"1183","ARCHS4 Coexpression,24;Enrichr Queries,50;GTEx Coexpression,138","KLB,FOXA1,RAB3B,RAB3C,GDA,TUSC3,CXCL13,SLC4A4,TMEM92,TMEM263,HID1,RGS4,SCGN,RGS2,MCIDAS,VSIG1,CDH2,CREB3L1,DPYSL2,RASSF6,CREB3L2,PDE8B,CHGB,CPA2,POSTN,EPHA7,CASR,KIRREL2,TRIQK,ENTPD3,CACNA2D1,CTRB1,KCNK16,ANXA10,RNASE4,BHLHA15,TM4SF4,OLFM4,VWA5B2,ISL1,PLPP5,CLPS,LMX1A,KCNQ1,CLDN8,LGALS12,SCG5,SCG3,KCTD12,SCG2,CFTR,STX1A,CEMIP,BEX2,GPR119,CTTNBP2,GIPR,SLC41A2,UBA5,ARX,CACNA1A,APCDD1,CPLX2,FUT1,NEUROD1,TRPM2,CRACR2B,PCK1,NPTX2,TAC1,SCN3A,RAI2,NKX2-2,TGFB2,SLC33A1,ST8SIA3,EIF2AK3,SLC16A12,DNAJC12,ESRRG,ST18,SYT7,CXCL10,DAP,PLCXD3,TH,FEV,FXYD2,RCAN2,RCAN3,ID4,CPE,PAM,LRP11,FKBP11,PNLIPRP1,CDKN1C,RET,CNTNAP2,PCSK1,PSCA,PTPRN,PDE3B,ICA1,HERPUD1,UNC80,SERP1,C1QTNF1,MECOM,UCN3,NEFM,FFAR1,TMED6,TMED8,EDN3,GPX3,ABCC8,ETV1,PAX6,SLC35G2,PROX1,SSTR1,SYNGR4,SSTR3,DNAJC3,NR5A2,ALDH1A1,KIT,KCNMA1,TFF2,GPRC5C,RGS17,DDC,LAMA4,SLC43A1,PALM3,CRYBA2,ATP2C2,CXXC4,SLC7A2,GNAI1,AURKB,MFSD4A,RASD1,GNG4,WIF1,HSD17B2,PAK3,SLC36A4,RUNX1T1,SEC11C,CHGA,TRPA1,GCH1,KCNB2,CADPS,SYVN1,LHFPL5,GCG,SORBS2,SYT13,MBOAT4,KLF4,FMO5,TTC39A,GCK,RFLNA,TTC8,FAM167A,GPR142,SST,SGSM3,A4GNT,ASXL3,QPCT,RIMBP2,GHRL,INSM1,SEC24D,LGR5,RAMP1,FOXA3,UNC79","20","70.67","","Rfx6","false","false","","Unclustered","2.051282051282051","Unclustered","2.051282051282051","ENSMUSG00000019900"
"1181","","",,,"","Scrn1","false","false","","Unclustered","5.0","Unclustered","7.0","ENSMUSG00000019124"
"1180","","",,,"","Unc79","false","false","","Unclustered","5.0","Unclustered","7.0","ENSMUSG00000021198"
"1179","","",,,"Cluster 2","Gng4","false","false","","Unclustered","7.644444444444445","Clustered","8.181818181818182","ENSMUSG00000021303"
"1173","","",,,"","Cnga4","false","false","","Unclustered","3.0","Unclustered","5.0","ENSMUSG00000030897"
"1171","","",,,"Cluster 1","BC021891","false","false","","Unclustered","5.785714285714286","Clustered","9.0","ENSMUSG00000031853"
"1169","","",,,"","Fbxl2","false","false","","Unclustered","4.0","Unclustered","5.0","ENSMUSG00000032507"
"1168","","",,,"","Dnajc12","false","false","","Unclustered","2.0","Unclustered","2.0","ENSMUSG00000036764"
"1167","","",,,"","Kirrel2","false","false","","Unclustered","4.0","Unclustered","3.466666666666667","ENSMUSG00000036915"
"1166","","",,,"Cluster 2","A4gnt","false","false","","Unclustered","5.785714285714286","Clustered","6.75","ENSMUSG00000037953"
"1165","","",,,"Cluster 2","Pitpnm3","false","false","","Unclustered","8.0","Clustered","8.181818181818182","ENSMUSG00000040543"
"1164","","",,,"Cluster 2","Pnmal1","false","false","","Unclustered","6.0","Clustered","7.0","ENSMUSG00000041141"
"1163","","",,,"","Gck","false","false","","Unclustered","4.0","Unclustered","3.8095238095238093","ENSMUSG00000041798"
"1162","","",,,"","Ucn3","false","false","","Unclustered","3.0","Unclustered","5.0","ENSMUSG00000044988"
"1161","","",,,"Cluster 1","Ptgs1","false","false","","Unclustered","6.0","Clustered","9.0","ENSMUSG00000047250"
"1159","ARCHS4 Coexpression,30;Enrichr Queries,58;GTEx Coexpression,149","RAB3B,FOXA1,RAB3C,CPNE4,TUSC3,GFI1,RGS4,SCGN,CCND1,CREB3L4,RESP18,MYB,CHGB,RGS7,CHRNB4,KCNH6,UNC5A,IGFBP3,IGFBP2,APLP1,CACNA2D2,KCNK16,TM4SF4,VWA5B2,ISL1,TANC2,OLFM1,EML5,PLPP5,RFX6,LMX1A,GPRIN1,LGALS12,SCG5,SCG3,LMX1B,SCG2,STX1A,BEX2,FICD,MAGED1,GPR119,UBA5,SLC35D3,ARX,FOXO6,CACNA1A,LPL,SLC38A11,CACNA1C,CPLX2,RAP1GAP,NEUROD1,TRPM2,NEUROD2,GALR1,SARAF,MAP6,NPTX1,NPTX2,TAC1,WNT3,RAI2,NKX2-2,PRNP,EGR2,BDNF,SLC16A12,DNAJC12,ESRRG,SYT7,ST18,PYY,CXCL10,PLCXD3,TH,LHX1,FXYD2,RCAN2,ALPL,CPE,FXYD6,RGL3,SLC26A4,PAM,PRRT4,ITM2C,LRP11,RET,PCSK1,SNAP25,BTG2,LRRC10B,PTPRN,ICA1,HSPB1,C1QTNF1,UCN3,MECOM,DNER,FFAR4,NEFM,KIF1A,FFAR1,TRPC7,AVPR1B,ACTL6B,ABCC8,GPX3,PAX6,MANEAL,PROX1,SSTR1,SYNGR4,SSTR3,NR5A2,TUBB2A,VGF,IRF1,ALDH1A1,CAMK2B,RGS17,DDC,PLPPR2,RGS16,CRYBA2,SEZ6,CRMP1,HOXD13,AURKB,SLC7A2,GNAI1,RASD1,GNG4,CAMK2N1,NT5DC2,MSX1,PAK3,P4HTM,CCDC184,SPDEF,SEC11C,CHGA,GCH1,PCDH8,IRX4,CCK,GCG,SYT13,MBOAT4,KLF4,DLK1,TTC39A,GCK,BAIAP3,NFASC,TTC8,FAM167A,TSPAN13,GPR142,NFIB,SGSM3,SMOC1,QPCT,RIMBP2,FOSB,INSM1,VIM,CDO1,SEC24D,UNC79,NEUROG3","28","79.0","","Fev","false","false","","Unclustered","2.142857142857143","Unclustered","2.142857142857143","ENSMUSG00000055197"
"1157","","",,,"Cluster 2","Gpbar1","false","false","","Unclustered","6.236363636363636","Clustered","8.018181818181818","ENSMUSG00000064272"
"1156","","",,,"","Cldn9","false","false","","Unclustered","4.0","Unclustered","7.0","ENSMUSG00000066720"
"1155","","",,,"Cluster 2","Cecr6","false","false","","Unclustered","7.644444444444445","Clustered","7.644444444444445","ENSMUSG00000094626"
"1152","","",,,"","Kit","false","false","","Unclustered","5.5","Unclustered","6.416666666666666","ENSMUSG00000005672"
"1151","","",,,"","Kcnq1","false","false","","Unclustered","4.909090909090909","Unclustered","6.545454545454546","ENSMUSG00000009545"
"1150","","",,,"","Tmprss15","false","false","","Unclustered","4.761904761904762","Unclustered","7.0","ENSMUSG00000022857"
"1148","","",,,"Cluster 2","Agxt","false","false","","Unclustered","5.653846153846154","Clustered","7.636363636363637","ENSMUSG00000026272"
"1147","","",,,"","Ak4","false","false","","Unclustered","6.0","Unclustered","6.5","ENSMUSG00000028527"
"1145","","",,,"","Saraf","false","false","","Unclustered","4.464285714285714","Unclustered","6.25","ENSMUSG00000031532"
"1144","","",,,"","1700088E04Rik","false","false","","Unclustered","2.0","Unclustered","2.0","ENSMUSG00000033029"
"1141","","",,,"","Siglecf","false","false","","Unclustered","3.888888888888889","Unclustered","5.833333333333334","ENSMUSG00000039013"
"1139","","",,,"","Syngr4","false","false","","Unclustered","2.0","Unclustered","2.0","ENSMUSG00000040231"
"1137","","",,,"","Klhl23","false","false","","Unclustered","5.066666666666666","Unclustered","6.222222222222221","ENSMUSG00000042155"
"1133","","",,,"","Gm9994","false","false","","Unclustered","2.0","Unclustered","2.0","ENSMUSG00000093805"
"1132","","",,,"Cluster 2","Btg2","false","false","","Unclustered","5.333333333333333","Clustered","7.111111111111111","ENSMUSG00000020423"
"1130","","",,,"","Id4","false","false","","Unclustered","2.0","Unclustered","2.0","ENSMUSG00000021379"
"1128","","",,,"Cluster 2","Ngfr","false","false","","Unclustered","6.0","Clustered","7.0","ENSMUSG00000000120"
"1127","","",,,"","Btbd17","false","false","","Unclustered","2.0","Unclustered","2.0","ENSMUSG00000000202"
"1125","","",,,"","Tpd52l1","false","false","","Unclustered","2.0","Unclustered","3.0","ENSMUSG00000000296"
"1124","","",,,"","Cttnbp2","false","false","","Unclustered","4.0","Unclustered","7.0","ENSMUSG00000000416"
"1123","","",,,"Cluster 2","Acvrl1","false","false","","Unclustered","5.0","Clustered","7.0","ENSMUSG00000000530"
"1122","","",,,"Cluster 1","Gnb1l","false","false","","Unclustered","5.785714285714286","Clustered","9.0","ENSMUSG00000000884"
"1121","","",,,"Cluster 1","Uhrf1","false","false","","Unclustered","5.785714285714286","Clustered","9.0","ENSMUSG00000001228"
"1120","","",,,"Cluster 2","Sync","false","false","","Unclustered","5.785714285714286","Clustered","6.75","ENSMUSG00000001333"
"1119","","",,,"Cluster 1","Col18a1","false","false","","Unclustered","8.0","Clustered","9.0","ENSMUSG00000001435"
"1117","","",,,"","Lrp3","false","false","","Unclustered","3.0","Unclustered","3.0","ENSMUSG00000001802"
"1116","","",,,"","Kcnh6","false","false","","Unclustered","5.0","Unclustered","6.0","ENSMUSG00000001901"
"1115","","",,,"","Pdzd4","false","false","","Unclustered","3.0","Unclustered","5.0","ENSMUSG00000002006"
"1114","","",,,"","Celf2","false","false","","Unclustered","4.0","Unclustered","5.0","ENSMUSG00000002107"
"1113","","",,,"","Rhoc","false","false","","Unclustered","3.0","Unclustered","5.0","ENSMUSG00000002233"
"1112","","",,,"","Ncan","false","false","","Unclustered","0.6666666666666666","Unclustered","0.6666666666666666","ENSMUSG00000002341"
"1111","","",,,"","Slc9a3r2","false","false","","Unclustered","4.0","Unclustered","5.0","ENSMUSG00000002504"
"1108","","",,,"","St8sia6","false","false","","Unclustered","4.0","Unclustered","7.0","ENSMUSG00000003418"
"1107","","",,,"","Gstm3","false","false","","Unclustered","6.0","Unclustered","6.5","ENSMUSG00000004038"
"1106","","",,,"Cluster 2","Pde1c","false","false","","Unclustered","5.0","Clustered","7.0","ENSMUSG00000004347"
"1105","","",,,"","Ghrhr","false","false","","Unclustered","5.0","Unclustered","7.0","ENSMUSG00000004654"
"1104","","",,,"Cluster 1","Asf1b","false","false","","Unclustered","6.236363636363636","Clustered","8.4","ENSMUSG00000005470"
"1103","","",,,"Cluster 2","Susd2","false","false","","Unclustered","4.761904761904762","Clustered","7.0","ENSMUSG00000006342"
"1101","","",,,"","Aplp1","false","false","","Unclustered","3.0","Unclustered","5.0","ENSMUSG00000006651"
"1100","","",,,"","P4htm","false","false","","Unclustered","4.761904761904762","Unclustered","7.0","ENSMUSG00000006675"
"1099","","",,,"","Pole","false","false","","Unclustered","0.0","Unclustered","0.0","ENSMUSG00000007080"
"1098","","",,,"Cluster 1","Dennd2c","false","false","","Unclustered","6.0","Clustered","9.0","ENSMUSG00000007379"
"1097","","",,,"","Cpt1c","false","false","","Unclustered","3.0","Unclustered","5.0","ENSMUSG00000007783"
"1096","","",,,"Cluster 2","Fut1","false","false","","Unclustered","4.909090909090909","Clustered","7.333333333333333","ENSMUSG00000008461"
"1095","","",,,"Cluster 1","Gprc5b","false","false","","Unclustered","5.785714285714286","Clustered","9.0","ENSMUSG00000008734"
"1094","","",,,"","Slc16a12","false","false","","Unclustered","2.7","Unclustered","5.0","ENSMUSG00000009378"
"1093","","",,,"","Kcnd1","false","false","","Unclustered","4.0","Unclustered","4.333333333333334","ENSMUSG00000009731"
"1092","","",,,"","Cacna2d2","false","false","","Unclustered","3.7333333333333334","Unclustered","6.0","ENSMUSG00000010066"
"1091","","",,,"","Tmem86a","false","false","","Unclustered","3.0","Unclustered","3.0","ENSMUSG00000010307"
"1090","","",,,"","Gabra1","false","false","","Unclustered","2.0","Unclustered","3.0","ENSMUSG00000010803"
"1089","","",,,"Cluster 2","Adam19","false","false","","Unclustered","5.0","Clustered","7.0","ENSMUSG00000011256"
"1088","","",,,"","Clip3","false","false","","Unclustered","5.0","Unclustered","6.0","ENSMUSG00000013921"
"1087","","",,,"Cluster 2","Kif1a","false","false","","Unclustered","4.761904761904762","Clustered","7.0","ENSMUSG00000014602"
"1086","","",,,"","Map2","false","false","","Unclustered","3.7333333333333334","Unclustered","4.666666666666667","ENSMUSG00000015222"
"1085","","",,,"","Lpl","false","false","","Unclustered","5.0","Unclustered","5.428571428571429","ENSMUSG00000015568"
"1084","","",,,"Cluster 1","Scube1","false","false","","Unclustered","8.0","Clustered","8.6","ENSMUSG00000016763"
"1082","","",,,"","Gsdma2","false","false","","Unclustered","4.0","Unclustered","4.333333333333334","ENSMUSG00000017211"
"1080","","",,,"Cluster 2","Rab11fip4","false","false","","Unclustered","5.785714285714286","Clustered","6.75","ENSMUSG00000017639"
"1079","","",,,"Cluster 1","Rhbdl3","false","false","","Unclustered","8.0","Clustered","9.0","ENSMUSG00000017692"
"1078","","",,,"Cluster 2","Gdap1l1","false","false","","Unclustered","5.785714285714286","Clustered","6.75","ENSMUSG00000017943"
"1077","","",,,"Cluster 4","Gpx3","false","false","","Unclustered","5.785714285714286","Clustered","6.5","ENSMUSG00000018339"
"1076","","",,,"Cluster 2","Kcnab3","false","false","","Unclustered","5.0","Clustered","7.0","ENSMUSG00000018470"
"1073","","",,,"","Mmp20","false","false","","Unclustered","4.0","Unclustered","5.0","ENSMUSG00000018620"
"1071","","",,,"Cluster 2","Sult4a1","false","false","","Unclustered","5.0","Clustered","7.0","ENSMUSG00000018865"
"1070","","",,,"","Ccl9","false","false","","Unclustered","2.0","Unclustered","3.0","ENSMUSG00000019122"
"1067","","",,,"","Pkib","false","false","","Unclustered","6.0","Unclustered","7.0","ENSMUSG00000019876"
"1066","","",,,"Cluster 2","Nts","false","false","","Unclustered","3.7333333333333334","Clustered","7.0","ENSMUSG00000019890"
"1065","","",,,"","Lin7a","false","false","","Unclustered","5.0","Unclustered","7.0","ENSMUSG00000019906"
"1064","","",,,"","Rhobtb1","false","false","","Unclustered","5.0","Unclustered","4.285714285714286","ENSMUSG00000019944"
"1062","","",,,"","Enpp3","false","false","","Unclustered","2.7","Unclustered","5.0","ENSMUSG00000019989"
"1060","","",,,"","Ntn4","false","false","","Unclustered","6.0","Unclustered","7.0","ENSMUSG00000020019"
"1059","","",,,"","Timp3","false","false","","Unclustered","0.4","Unclustered","0.4","ENSMUSG00000020044"
"1058","","",,,"Cluster 1","H2afy2","false","false","","Unclustered","6.0","Clustered","9.0","ENSMUSG00000020086"
"1057","","",,,"","Lgr5","false","false","","Unclustered","4.0","Unclustered","5.0","ENSMUSG00000020140"
"1055","","",,,"","Rab36","false","false","","Unclustered","4.0","Unclustered","5.0","ENSMUSG00000020175"
"1054","","",,,"Cluster 2","Grb10","false","false","","Unclustered","6.0","Clustered","7.0","ENSMUSG00000020176"
"1053","","",,,"Cluster 2","Adora2a","false","false","","Unclustered","6.0","Clustered","7.0","ENSMUSG00000020178"
"1052","","",,,"","Aldh1l2","false","false","","Unclustered","3.7333333333333334","Unclustered","7.0","ENSMUSG00000020256"
"1051","","",,,"Cluster 2","Acsl6","false","false","","Unclustered","6.0","Clustered","7.0","ENSMUSG00000020333"
"1050","","",,,"","3010026O09Rik","false","false","","Unclustered","0.0","Unclustered","0.0","ENSMUSG00000020381"
"1049","","",,,"","Fabp6","false","false","","Unclustered","5.0","Unclustered","5.0","ENSMUSG00000020405"
"1048","","",,,"","Adcy1","false","false","","Unclustered","4.761904761904762","Unclustered","7.0","ENSMUSG00000020431"
"1046","","",,,"","Myl7","false","false","","Unclustered","3.0","Unclustered","5.0","ENSMUSG00000020469"
"1044","","",,,"","Nbas","false","false","","Unclustered","2.7","Unclustered","3.6","ENSMUSG00000020576"
"1043","","",,,"","Fkbp1b","false","false","","Unclustered","5.0","Unclustered","5.0","ENSMUSG00000020635"
"1042","","",,,"Cluster 1","Mmp28","false","false","","Unclustered","8.672727272727272","Clustered","9.636363636363637","ENSMUSG00000020682"
"1041","","",,,"Cluster 2","Rasl10b","false","false","","Unclustered","5.0","Clustered","7.0","ENSMUSG00000020684"
"1040","","",,,"","Pecam1","false","false","","Unclustered","3.0","Unclustered","5.0","ENSMUSG00000020717"
"1039","","",,,"Cluster 2","Rab37","false","false","","Unclustered","6.1090909090909085","Clustered","8.2","ENSMUSG00000020732"
"1038","","",,,"","Dlg4","false","false","","Unclustered","2.4000000000000004","Unclustered","5.0","ENSMUSG00000020886"
"1036","","",,,"","Coch","false","false","","Unclustered","4.0","Unclustered","5.0","ENSMUSG00000020953"
"1035","","",,,"Cluster 2","Ttc8","false","false","","Unclustered","5.0","Clustered","7.0","ENSMUSG00000021013"
"1033","","",,,"","Cdca7l","false","false","","Unclustered","3.0","Unclustered","3.0","ENSMUSG00000021175"
"1032","","",,,"","Slc25a29","false","false","","Unclustered","2.7","Unclustered","3.6","ENSMUSG00000021265"
"1031","","",,,"Cluster 1","Elovl2","false","false","","Unclustered","8.0","Clustered","8.6","ENSMUSG00000021364"
"1030","","",,,"Cluster 2","Serpinb9b","false","false","","Unclustered","5.0","Clustered","7.0","ENSMUSG00000021403"
"1029","","",,,"","Slc25a48","false","false","","Unclustered","5.0","Unclustered","5.0","ENSMUSG00000021509"
"1026","ARCHS4 Coexpression,558;Enrichr Queries,410;GTEx Coexpression,598","FOXA1,ANKRD35,IRS1,CWH43,CLDN1,SOGA1,CCND1,BASP1,MYC,CHEK2,PIEZO1,LIPK,TNS4,PHLDA3,PRKCI,IGFBP3,IGFBP2,SYTL1,ISL1,MYT1,OLFM1,MYL7,LGALS12,SCNN1A,LMX1B,COL17A1,NOTCH3,CTTNBP2,TSHZ2,CACNA1B,PLA2G3,CACNA1A,ALDH3B2,TRPM2,KLC3,RDH12,STC2,S100A14,KCNN4,NPTX2,TAC1,WNT3,ZBTB7C,EGR2,BDNF,NEBL,INHBB,ESRRG,FBXO32,POU2F3,BMP4,SDK1,CXCL10,EFNA3,GJB2,GJB3,FXYD3,ARTN,LYPD6B,LHX1,SP6,ID4,SDC1,FGFR3,NRP1,COL18A1,CNTNAP2,PTPRU,CCDC120,HSPB8,HSPB1,TFCP2L1,SDR16C5,C1QTNF1,GM2A,MMP28,PLEKHN1,DENND2C,FGFBP1,CLUH,TNFRSF19,PAX6,ETV4,CBFA2T3,MN1,MMP15,KCNMA1,ARHGEF4,RHOV,GPRC5C,HCN4,CRMP1,THBS1,PTHLH,AURKB,RASD1,GPR153,RASSF10,RNF39,LRIG1,SPOCK1,SPTSSB,MSX1,SLIT2,AHNAK2,PCDH8,KRT10,KLF4,SMOC2,NFIB,KRT15,FOSB,INSM1,CENPP","538","522.0","","Irx4","false","false","","Unclustered","4.464285714285714","Unclustered","7.0","ENSMUSG00000021604"
"1025","","",,,"Cluster 2","Pde8b","false","false","","Unclustered","6.0","Clustered","7.0","ENSMUSG00000021684"
"1024","","",,,"","Rab3c","false","false","","Unclustered","4.761904761904762","Unclustered","7.0","ENSMUSG00000021700"
"1023","","",,,"","Hcn1","false","false","","Unclustered","5.0","Unclustered","7.0","ENSMUSG00000021730"
"1021","","",,,"Cluster 2","Sema3g","false","false","","Unclustered","6.0","Clustered","7.0","ENSMUSG00000021904"
"1019","","",,,"Cluster 2","Olfm4","false","false","","Unclustered","5.0","Clustered","7.0","ENSMUSG00000022026"
"1018","","",,,"Cluster 2","Pbk","false","false","","Unclustered","6.377777777777777","Clustered","7.288888888888889","ENSMUSG00000022033"
"1017","","",,,"","Esco2","false","false","","Unclustered","6.0","Unclustered","6.027777777777779","ENSMUSG00000022034"
"1014","","",,,"Cluster 1","37865","false","false","","Unclustered","8.0","Clustered","8.6","ENSMUSG00000022456"
"1013","","",,,"Cluster 2","Emp2","false","false","","Unclustered","5.066666666666666","Clustered","6.7555555555555555","ENSMUSG00000022505"
"1012","","",,,"Cluster 1","Cldn1","false","false","","Unclustered","6.0","Clustered","9.0","ENSMUSG00000022512"
"1011","","",,,"Cluster 1","Tmem44","false","false","","Unclustered","8.0","Clustered","9.0","ENSMUSG00000022537"
"1010","","",,,"","Psca","false","false","","Unclustered","5.0","Unclustered","5.428571428571429","ENSMUSG00000022598"
"1009","","",,,"Cluster 2","Sidt1","false","false","","Unclustered","5.0","Clustered","7.0","ENSMUSG00000022696"
"1007","","",,,"Cluster 1","Stxbp5l","false","false","","Unclustered","5.785714285714286","Clustered","9.0","ENSMUSG00000022829"
"1006","","",,,"","Pdia5","false","false","","Unclustered","3.0","Unclustered","3.75","ENSMUSG00000022844"
"1005","","",,,"Cluster 2","Ripply3","false","false","","Unclustered","6.0","Clustered","7.0","ENSMUSG00000022941"
"1004","","",,,"","Mis18a","false","false","","Unclustered","2.0","Unclustered","3.0","ENSMUSG00000022978"
"1002","","",,,"","P3h3","false","false","","Unclustered","3.0","Unclustered","5.0","ENSMUSG00000023191"
"1000","","",,,"Cluster 2","Kcnk16","false","false","","Unclustered","4.761904761904762","Clustered","7.0","ENSMUSG00000023387"
"998","","",,,"Cluster 1","Cyp39a1","false","false","","Unclustered","5.9393939393939394","Clustered","8.909090909090908","ENSMUSG00000023963"
"997","","",,,"","Rsph9","false","false","","Unclustered","3.7333333333333334","Unclustered","4.0476190476190474","ENSMUSG00000023966"
"996","","",,,"Cluster 2","Tff2","false","false","","Unclustered","6.0","Clustered","7.0","ENSMUSG00000024028"
"995","","",,,"Cluster 2","Tff3","false","false","","Unclustered","4.800000000000001","Clustered","7.111111111111111","ENSMUSG00000024029"
"994","","",,,"Cluster 1","Crim1","false","false","","Unclustered","5.785714285714286","Clustered","9.0","ENSMUSG00000024074"
"993","","",,,"Cluster 2","Cacna1h","false","false","","Unclustered","8.0","Clustered","7.7727272727272725","ENSMUSG00000024112"
"992","","",,,"","Nme4","false","false","","Unclustered","3.0","Unclustered","5.0","ENSMUSG00000024177"
"991","ARCHS4 Coexpression,550;Enrichr Queries,104;GTEx Coexpression,468","FOXA1,FCGBP,EHF,CHRM1,CPNE4,CWH43,ETS1,HID1,CDC20,LGALS3,PREX1,RGS2,CAPN9,CCND1,CREB3L4,CREB3L1,MYC,CHEK2,MYB,PIEZO1,CCDC160,TGM2,IER3,KCNH6,IGFBP3,SYTL1,OVOL2,SYTL2,ERN2,TIAM1,PLPP5,CLDN4,MELK,SCNN1A,SIDT1,NUPR1,LMX1B,MYL9,FUT2,RAP1GAP,CACNA1H,SLC9A3R2,CCNB2,ALDH3B2,CRACR2A,CRACR2B,STC2,KCNN4,TSPAN1,ST3GAL1,PRNP,TNFSF15,UBE2C,PLK1,HMGA2,RAB27B,INHBB,SYT7,GADD45G,FOSL1,ISG20,BMP4,FAM111A,CXCL10,FXYD3,BAMBI,RCAN3,MYO5C,CDK1,TOP2A,KIF14,ATP2A3,HSPB1,MIA3,TFCP2L1,SYNE4,HERPUD1,LFNG,FAM102A,TRIM3,TMED3,TIMP2,EFHD1,MYBL2,BCAS1,SMIM14,SLC2A10,ETV1,GFRA1,EMP2,CCNA2,BACE2,SAPCD2,KCNMA1,TFF3,BIRC5,FBP1,SLC29A2,ATP2C2,THBS1,AURKB,PDE11A,CAMK2N1,AGR2,SLITRK6,LRIG1,SPTSSB,LRRC26,RRM2,KLF4,TTC39A,CENPE,MLPH,TSPAN13,NFIB,SGSM3,TRIM37,CCL28,NUCB2","302","374.0","","Spdef","false","false","","Unclustered","2.7","Unclustered","2.7","ENSMUSG00000024215"
"990","","",,,"","Clps","false","false","","Unclustered","4.0","Unclustered","4.0","ENSMUSG00000024225"
"989","","",,,"","Dtna","false","false","","Unclustered","5.0","Unclustered","5.428571428571429","ENSMUSG00000024302"
"988","","",,,"Cluster 2","Cdh2","false","false","","Unclustered","5.0","Clustered","7.0","ENSMUSG00000024304"
"987","","",,,"Cluster 1","Spata24","false","false","","Unclustered","6.0","Clustered","9.0","ENSMUSG00000024352"
"986","","",,,"Cluster 2","Proc","false","false","","Unclustered","6.1090909090909085","Clustered","8.2","ENSMUSG00000024386"
"985","","",,,"Cluster 2","Aqp4","false","false","","Unclustered","5.0","Clustered","7.0","ENSMUSG00000024411"
"984","","",,,"Cluster 1","Dpysl3","false","false","","Unclustered","6.0","Clustered","9.0","ENSMUSG00000024501"
"983","","",,,"","Rab27b","false","false","","Unclustered","3.0","Unclustered","3.0","ENSMUSG00000024511"
"981","ARCHS4 Coexpression,199;Enrichr Queries,129;GTEx Coexpression,465","SEMA5A,MDC1,CNTFR,IRS1,DIXDC1,RORA,FRY,NR3C1,ETS1,SLC4A4,SLC8A1,IGF1R,RGS2,CDH2,KIF5C,DPYSL2,DPYSL3,STMN1,PLXNC1,EPHA4,MBNL1,EPHA7,TMEM178B,DAPK1,CACNA2D1,ARID5B,FRMD4A,HSPG2,SELENOM,MAP1B,LGALS12,KCNQ4,KCTD12,MYL9,TRABD2B,ARHGEF25,MAGED1,RNF180,TSHZ2,ITPR2,SLCO5A1,CACNA1C,NREP,NUAK1,BAG2,MAP2,MAP6,HIVEP3,ST3GAL1,SCN3A,RAI2,PLXNA4,MARK1,PRNP,TGFB2,FZD3,CBX5,OSBPL5,RBPMS,ATP8B2,CADM1,ARHGEF39,FZD7,ZBTB10,CRIM1,MCC,DCLK1,ARHGAP24,ST18,REEP1,SDK1,CXCL10,H2AFY2,PKIA,ID4,CPE,FXYD6,FAT4,CDK14,FERMT2,ITM2C,GPSM1,COL18A1,NRP1,CNTNAP2,BTG2,TENM4,TGFB1I1,CELF2,FHL1,GPR20,PTPRM,ARHGAP6,SYNE1,TUBA1A,SH3PXD2A,GDAP1L1,TIMP3,EMILIN1,CEP170,CC2D2A,KLF12,DST,MYOF,NAV1,PARD3B,MN1,TUBB2A,KCNMA1,KIT,LCOR,PLCB1,PDZRN3,PRUNE2,FAM129A,CRMP1,HOXD13,SNX33,MLLT3,THBS1,CXXC4,AURKB,NCALD,ABLIM1,GNG2,ALDH1B1,TCEAL1,MAN1C1,SLIT1,LRIG1,SLIT2,PAK3,WASF1,RUNX1T1,GSN,SORBS2,PNMA2,KLF4,SORL1,KBTBD6,GSTA4,ABI2,NFIB,SYT11,ASXL3,NOVA2,SSBP2,CDO1","170","264.3","Cluster 1","Setbp1","false","false","","Unclustered","7.5636363636363635","Clustered","9.272727272727273","ENSMUSG00000024548"
"980","","",,,"Cluster 1","Galr1","false","false","","Unclustered","5.785714285714286","Clustered","9.0","ENSMUSG00000024553"
"979","","",,,"Cluster 2","Cnih2","false","false","","Unclustered","4.0","Clustered","7.0","ENSMUSG00000024873"
"978","","",,,"","Mtl5","false","false","","Unclustered","3.142857142857143","Unclustered","3.9285714285714284","ENSMUSG00000024905"
"976","","",,,"","Lgals12","false","false","","Unclustered","4.0","Unclustered","5.0","ENSMUSG00000024972"
"975","","",,,"","Cyp2c55","false","false","","Unclustered","3.7333333333333334","Unclustered","7.0","ENSMUSG00000025002"
"974","","",,,"","Slit1","false","false","","Unclustered","0.0","Unclustered","0.0","ENSMUSG00000025020"
"973","","",,,"Cluster 1","Add3","false","false","","Unclustered","5.785714285714286","Clustered","9.0","ENSMUSG00000025026"
"971","","",,,"","Ablim1","false","false","","Unclustered","4.0","Unclustered","5.0","ENSMUSG00000025085"
"970","","",,,"","Gfra1","false","false","","Unclustered","5.2","Unclustered","6.066666666666666","ENSMUSG00000025089"
"969","","",,,"","Fn3k","false","false","","Unclustered","4.0","Unclustered","5.0","ENSMUSG00000025175"
"968","","",,,"","Fgd1","false","false","","Unclustered","5.0","Unclustered","7.0","ENSMUSG00000025265"
"967","","",,,"Cluster 1","Maged2","false","false","","Unclustered","5.0","Clustered","9.0","ENSMUSG00000025268"
"966","","",,,"","Padi1","false","false","","Unclustered","6.0","Unclustered","5.0","ENSMUSG00000025329"
"965","","",,,"","Mettl7b","false","false","","Unclustered","4.464285714285714","Unclustered","5.357142857142858","ENSMUSG00000025347"
"964","","",,,"","Prim1","false","false","","Unclustered","4.0","Unclustered","5.0","ENSMUSG00000025395"
"963","","",,,"","Inhbc","false","false","","Unclustered","3.7333333333333334","Unclustered","7.0","ENSMUSG00000025405"
"962","","",,,"","Avil","false","false","","Unclustered","3.0","Unclustered","5.0","ENSMUSG00000025432"
"961","","",,,"","Cyp2e1","false","false","","Unclustered","4.464285714285714","Unclustered","7.0","ENSMUSG00000025479"
"960","","",,,"Cluster 2","Muc2","false","false","","Unclustered","4.761904761904762","Clustered","7.0","ENSMUSG00000025515"
"959","","",,,"","Nptx1","false","false","","Unclustered","3.0","Unclustered","3.0","ENSMUSG00000025582"
"958","","",,,"","Zfp202","false","false","","Unclustered","3.142857142857143","Unclustered","5.142857142857142","ENSMUSG00000025602"
"956","","",,,"","Cnksr2","false","false","","Unclustered","2.7","Unclustered","5.0","ENSMUSG00000025658"
"955","","",,,"Cluster 2","Alox5","false","false","","Unclustered","4.0","Clustered","7.0","ENSMUSG00000025701"
"954","","",,,"","Gng13","false","false","","Unclustered","4.0","Unclustered","4.333333333333334","ENSMUSG00000025739"
"953","","",,,"Cluster 2","Cplx2","false","false","","Unclustered","6.0","Clustered","7.0","ENSMUSG00000025867"
"952","","",,,"Cluster 2","Cps1","false","false","","Unclustered","4.523809523809524","Clustered","7.0","ENSMUSG00000025991"
"951","","",,,"","Dst","false","false","","Unclustered","4.761904761904762","Unclustered","5.7142857142857135","ENSMUSG00000026131"
"950","","",,,"","Sphkap","false","false","","Unclustered","4.0","Unclustered","7.0","ENSMUSG00000026163"
"948","","",,,"","Inpp5d","false","false","","Unclustered","4.0","Unclustered","5.0","ENSMUSG00000026288"
"945","","",,,"Cluster 2","Htr4","false","false","","Unclustered","5.5","Clustered","7.333333333333333","ENSMUSG00000026322"
"944","","",,,"","Tmem163","false","false","","Unclustered","5.571428571428571","Unclustered","6.5","ENSMUSG00000026347"
"943","","",,,"Cluster 1","Nfasc","false","false","","Unclustered","5.785714285714286","Clustered","9.0","ENSMUSG00000026442"
"942","","",,,"","Rgs16","false","false","","Unclustered","4.761904761904762","Unclustered","5.7142857142857135","ENSMUSG00000026475"
"941","","",,,"","Rgl1","false","false","","Unclustered","0.5","Unclustered","0.5","ENSMUSG00000026482"
"939","","",,,"Cluster 2","Pycr2","false","false","","Unclustered","6.1090909090909085","Clustered","8.2","ENSMUSG00000026520"
"937","","",,,"","Mark1","false","false","","Unclustered","4.761904761904762","Unclustered","7.0","ENSMUSG00000026620"
"936","ARCHS4 Coexpression,655;Enrichr Queries,439;GTEx Coexpression,266","RAB3B,FOXA1,TUSC3,DIXDC1,RORA,CELSR3,CDH2,BASP1,DPYSL2,STMN1,CHGB,RGS7,KCNH2,EPHA4,EPHA7,KCNH6,IGFBP3,P3H3,SLC51A,ISL1,FAM227A,RAB36,CLDN9,LGALS12,SCG5,LMX1B,SCG2,NUMBL,MAGED1,CAPSL,TSHZ2,ARX,GLIS3,FOXO6,CACNA1A,TNFRSF11A,NREP,APCDD1,NEUROD1,GHRHR,IGSF21,TRPM2,MAP2,GALR1,MAP6,NPTX2,TAC1,SCN3A,TGFB2,FZD3,CADM1,BDNF,LRRN2,ABCA7,SSC5D,ESRRG,ST18,AHI1,SDK1,CXCL10,LHX1,FEV,MAGED2,XKR4,RET,CNTNAP2,TENM4,PTPRN,GRIK3,CELF6,SOBP,C1QTNF1,MECOM,DNER,FFAR4,NEFM,QSOX2,TRPC7,AVPR1B,ABCC8,NAV1,GFRA1,PAX6,PROX1,NR5A2,KCNMA1,CKS2,SPACA6,DDC,RGS16,COL11A2,CRMP1,CXXC4,FSTL4,AURKB,NCALD,RASD1,SV2C,SLIT1,SPOCK1,HES1,MSX1,SLIT2,PAK3,P4HTM,RUNX1T1,TPBG,PCDH8,CADPS,SYT13,KLF4,POU4F1,GCK,DLK1,BAIAP3,MGAT4C,SLC4A8,SMOC2,TTC8,NFASC,ABI2,NFIB,RIMBP2,INSM1,CDO1,KCNK2,UNC79","422","453.3","Cluster 2","Lmx1a","false","false","","Unclustered","4.761904761904762","Clustered","7.0","ENSMUSG00000026686"
"935","","",,,"Cluster 2","Cubn","false","false","","Unclustered","6.0","Clustered","7.0","ENSMUSG00000026726"
"934","","",,,"","Pip4k2a","false","false","","Unclustered","2.0","Unclustered","3.0","ENSMUSG00000026737"
"933","","",,,"","Lypd6b","false","false","","Unclustered","5.785714285714286","Unclustered","6.75","ENSMUSG00000026765"
"932","","",,,"Cluster 1","Abi2","false","false","","Unclustered","7.644444444444445","Clustered","8.6","ENSMUSG00000026782"
"931","","",,,"","Galnt5","false","false","","Unclustered","4.0","Unclustered","7.0","ENSMUSG00000026828"
"930","","",,,"Cluster 1","Slc43a3","false","false","","Unclustered","6.0","Clustered","9.0","ENSMUSG00000027074"
"929","","",,,"Cluster 2","Dut","false","false","","Unclustered","4.761904761904762","Clustered","7.0","ENSMUSG00000027203"
"928","","",,,"Cluster 1","Hdc","false","false","","Unclustered","6.0","Clustered","9.0","ENSMUSG00000027360"
"927","","",,,"Cluster 1","Bub1","false","false","","Unclustered","6.0","Clustered","9.0","ENSMUSG00000027379"
"926","","",,,"","Stmn3","false","false","","Unclustered","3.0","Unclustered","3.0","ENSMUSG00000027581"
"925","","",,,"Cluster 2","Mmp24","false","false","","Unclustered","6.0","Clustered","7.0","ENSMUSG00000027612"
"923","","",,,"Cluster 2","Pex5l","false","false","","Unclustered","4.761904761904762","Clustered","7.0","ENSMUSG00000027674"
"922","Literature ChIP-seq,105;ARCHS4 Coexpression,765;GTEx Coexpression,197","IFITM3,SLC46A3,AQP9,SMC4,TMEM92,MCIDAS,VSIG1,GNAT2,LIPH,CREB3L1,RASSF6,TNFSF10,PIP4K2A,SKP2,MBNL1,RNASE4,TIAM1,GPR162,RFX6,TFR2,RRAGB,KCNQ1,PIF1,GIPR,SHMT2,MGST2,FAM221A,CRACR2B,RDH12,PRKAR2B,TSPAN6,INPP5D,ST8SIA4,SARAF,ST3GAL1,ZBTB7C,ATP6V0A1,SLC19A2,DNAH11,FER1L4,CADM1,EDEM2,EIF2AK3,RAB27A,RASSF9,PYCR2,FER1L6,GADD45G,UCK2,AKR1B10,MYO5C,CDK14,ITM2C,ACVRL1,DENND1C,BTG2,PTPRN,RCSD1,HERPUD1,LFNG,GLIPR1,SERP1,TUBA1A,MECOM,IMPA2,CLDN23,QSOX1,TMED6,CD53,PCYT1B,EMP2,KIF23,PROX1,KIF22,CBFA2T3,ZDHHC14,ZDHHC15,APBB1IP,BACE2,INCENP,PITPNM3,CKS2,TFF2,PLEKHO1,KIFC3,TLR6,GPRC5C,HCST,SDCCAG8,SLC29A2,PHLPP1,INPP1,PTGER3,SLC43A1,CENPA,PTGS1,TMEM71,MFSD4A,PROKR1,AGR2,RAD54L,GABRA2,PLEKHA2,ATAD2,GPR55,LAPTM5,FMO5,RFLNA,RIT1,GFI1B,CMSS1,ABI2,ETNK1,SGSM3,A4GNT,FKBP1B,GHRL,CENPN,FOXA3,FRYL,NUCB2,FOXA1,GALNT12,NRROS,NCF2,TUSC3,TMEM140,CAPN8,RGS2,CAPN9,IL18RAP,CCRL2,CAPN2,DENND5A,MYLIP,GAS2L3,CD93,IGFBP4,ANKRD44,IGFBP2,TTC7B,ARID5A,ANXA10,FRMD4A,VASH1,PLA2G15,ERN2,ACAP3,SELENOM,TEX9,MFNG,SCNN1A,SLC9A9,NUPR1,CSF1R,BLM,CALCRL,AKNA,SLC41A2,ITPR2,FUT1,CALHM2,GRK5,NLRP6,CYP11A1,ECT2,FAM83D,MYH10,PLXNA4,SLC14A1,SLC14A2,DENND4B,ATP8B2,ANKRD22,OSBPL2,CCDC15,HMGA2,ESRRG,DAP,FES,DNAJC10,TTC25,KCNK6,PSCA,ONECUT3,TNFAIP2,ATP2A3,LRMP,ITGAL,PIK3CG,NRGN,SYNE1,SPN,PSTPIP1,LBH,ADGRE5,ITGB7,MYBL2,TOPBP1,EGFL7,ITGA4,SH2D3C,LIX1L,SSTR1,ETV6,RCN1,ADGRF1,GFOD1,RASA3,ALDH1A1,ADGRF5,PECAM1,IRF7,GNB1L,MCM6,MCTP2,HEMGN,RGS14,REP15,PALM3,ADD3,USP18,NWD1,GNG2,SH3BP1,SLC36A4,SEC11C,KCNJ5,CYB5A,RRM2,CYP4B1,ARID3A,MLPH,P2RX4,PIK3IP1,BCL6B,ALOX5AP,TRIM35,SLC25A30,VIM,MYO1H,CD244,SLC25A35","276","355.7","","Mecom","false","false","","Unclustered","3.0","Unclustered","5.0","ENSMUSG00000027684"
"921","","",,,"Cluster 2","Trpc4","false","false","","Unclustered","6.0","Clustered","7.0","ENSMUSG00000027748"
"919","","",,,"","Tm4sf4","false","false","","Unclustered","5.0","Unclustered","6.0","ENSMUSG00000027801"
"918","","",,,"","Reg4","false","false","","Unclustered","4.0","Unclustered","5.0","ENSMUSG00000027876"
"917","","",,,"","Asic5","false","false","","Unclustered","3.0","Unclustered","3.0","ENSMUSG00000028008"
"916","","",,,"","Pdgfc","false","false","","Unclustered","3.0","Unclustered","5.0","ENSMUSG00000028019"
"914","","",,,"Cluster 2","Iqgap3","false","false","","Unclustered","5.0","Clustered","7.0","ENSMUSG00000028068"
"913","","",,,"","Fmo5","false","false","","Unclustered","4.464285714285714","Unclustered","7.0","ENSMUSG00000028088"
"912","","",,,"","Ctsk","false","false","","Unclustered","4.0","Unclustered","5.0","ENSMUSG00000028111"
"911","","",,,"Cluster 2","Mmp16","false","false","","Unclustered","5.0","Clustered","7.0","ENSMUSG00000028226"
"910","","",,,"","Sdr16c5","false","false","","Unclustered","4.0","Unclustered","7.0","ENSMUSG00000028236"
"909","","",,,"Cluster 2","Clca1","false","false","","Unclustered","6.0","Clustered","7.0","ENSMUSG00000028255"
"908","","",,,"","Epha7","false","false","","Unclustered","6.0","Unclustered","5.6000000000000005","ENSMUSG00000028289"
"906","ARCHS4 Coexpression,459;Enrichr Queries,98;GTEx Coexpression,914","RASL11B,IRS1,RORA,NR3C1,SOGA1,CELSR3,IFIT3,IFIT2,MTBP,RGS2,ZFP30,CCND1,CDH2,KIF5C,BASP1,DPYSL2,CHEK2,DPYSL3,STMN1,GRB10,PIEZO1,IER3,EPHA4,RSAD2,IGFBP4,IGFBP3,ARID5B,CPT1C,MYT1,EML1,FAM227A,EML5,TIAM1,OLFM1,PROCR,MAP1B,LGALS12,KCTD12,PDE1C,CACNA1A,LPL,NREP,FAM221A,GRK2,MAP2,PDGFC,NXPH1,SCN3A,NXNL2,PRNP,ANKRD26,EGR2,TGFB2,FZD3,CADM1,BDNF,ARHGAP29,SMARCA1,DCLK1,BMP4,REEP1,XKR7,CXCL10,PKIA,ID4,FXYD6,GNB5,XKR4,CD200,MAP3K12,ITM2C,NRP1,BTG2,HSPB1,RND3,UNC80,TUBA1A,SCRN1,TIMP3,CEP170,TRIM67,KLF12,CLUH,DST,PEG3,ACTL6B,TRPC1,PAX6,ETV1,NAV1,ZDHHC15,MN1,PLCB4,MMP16,KCNMA1,RGS17,NIM1K,PRUNE2,NEXN,CRMP1,THBS1,GNAI1,AURKB,NCALD,GNG2,CAMK2N1,SLIT1,LRIG1,SPOCK1,NRIP3,PAK3,RUNX1T1,CASP8AP2,PCDHGC4,LHFPL5,SORBS2,SYT14,KLF4,STXBP5L,TTLL7,KBTBD6,GSTA4,NFIB,QPCT,ETNK1,KLHL7,ASXL3,YPEL1,FOSB,RGS12,VIM,CDO1,SSBP2","490","490.3","Cluster 2","Zfp37","false","false","","Unclustered","4.0","Clustered","7.0","ENSMUSG00000028389"
"905","","",,,"Cluster 2","Wdr31","false","false","","Unclustered","4.761904761904762","Clustered","7.0","ENSMUSG00000028391"
"903","","",,,"","Aqp7","false","false","","Unclustered","2.0","Unclustered","2.0","ENSMUSG00000028427"
"902","","",,,"","Cntfr","false","false","","Unclustered","2.7","Unclustered","5.0","ENSMUSG00000028444"
"901","","",,,"","Atp8b5","false","false","","Unclustered","4.0","Unclustered","5.0","ENSMUSG00000028457"
"899","","",,,"Cluster 2","Artn","false","false","","Unclustered","4.0","Clustered","7.0","ENSMUSG00000028539"
"897","","",,,"","Gpx7","false","false","","Unclustered","4.0","Unclustered","7.0","ENSMUSG00000028597"
"896","","",,,"Cluster 2","Kcnq4","false","false","","Unclustered","5.0","Clustered","7.0","ENSMUSG00000028631"
"895","","",,,"Cluster 2","Alpl","false","false","","Unclustered","8.0","Clustered","8.018181818181818","ENSMUSG00000028766"
"894","","",,,"","Hpca","false","false","","Unclustered","5.0","Unclustered","5.428571428571429","ENSMUSG00000028785"
"893","","",,,"Cluster 2","Sytl1","false","false","","Unclustered","3.7333333333333334","Clustered","7.0","ENSMUSG00000028860"
"892","","",,,"","Gabrd","false","false","","Unclustered","3.0","Unclustered","3.0","ENSMUSG00000029054"
"890","","",,,"Cluster 1","Rgs12","false","false","","Unclustered","6.0","Clustered","9.0","ENSMUSG00000029101"
"889","","",,,"","Crmp1","false","false","","Unclustered","4.166666666666667","Unclustered","7.0","ENSMUSG00000029121"
"888","","",,,"","Stk32b","false","false","","Unclustered","5.0","Unclustered","5.428571428571429","ENSMUSG00000029123"
"887","","",,,"Cluster 1","Plb1","false","false","","Unclustered","8.0","Clustered","9.0","ENSMUSG00000029134"
"886","","",,,"","Klb","false","false","","Unclustered","5.5","Unclustered","6.416666666666666","ENSMUSG00000029195"
"885","","",,,"","Brdt","false","false","","Unclustered","6.0","Unclustered","7.0","ENSMUSG00000029279"
"884","","",,,"","Bmp3","false","false","","Unclustered","5.0","Unclustered","5.428571428571429","ENSMUSG00000029335"
"882","","",,,"","Cyp2w1","false","false","","Unclustered","3.0","Unclustered","3.0","ENSMUSG00000029541"
"881","","",,,"Cluster 2","Lfng","false","false","","Unclustered","5.785714285714286","Clustered","6.75","ENSMUSG00000029570"
"880","","",,,"Cluster 1","Ung","false","false","","Unclustered","6.0","Clustered","9.0","ENSMUSG00000029591"
"879","","",,,"Cluster 2","Sdsl","false","false","","Unclustered","5.785714285714286","Clustered","6.75","ENSMUSG00000029596"
"878","","",,,"","Slc13a1","false","false","","Unclustered","3.7333333333333334","Unclustered","6.0","ENSMUSG00000029700"
"877","","",,,"","Actl6b","false","false","","Unclustered","6.0","Unclustered","6.5","ENSMUSG00000029712"
"876","","",,,"","Tfr2","false","false","","Unclustered","3.0","Unclustered","3.0","ENSMUSG00000029716"
"875","","",,,"","Akr1b8","false","false","","Unclustered","3.555555555555556","Unclustered","4.266666666666667","ENSMUSG00000029762"
"874","","",,,"","Plxna4","false","false","","Unclustered","3.4285714285714284","Unclustered","6.0","ENSMUSG00000029765"
"873","","",,,"","Clcn1","false","false","","Unclustered","4.0","Unclustered","4.333333333333334","ENSMUSG00000029862"
"872","","",,,"","Sval1","false","false","","Unclustered","3.0","Unclustered","5.0","ENSMUSG00000029865"
"871","","",,,"Cluster 1","Gkn3","false","false","","Unclustered","7.644444444444445","Clustered","8.6","ENSMUSG00000030048"
"870","ARCHS4 Coexpression,900;Enrichr Queries,486;GTEx Coexpression,758","IFITM3,IRS1,PROS1,GALNT18,RORA,MKI67,SLC4A4,LGALS3,RGS2,RPS6KA6,IL18RAP,CCND1,DPYSL2,MYC,CHEK2,LONP1,GLUL,TGM2,IER3,LIG1,IGFBP3,IGFBP2,SERPINF2,ARID5B,RNASE4,FAM185A,LGALS12,SERPING1,KCNQ4,NUPR1,CYP2E1,PFKFB1,SDC4,ARHGEF25,GPR85,LPL,SLC1A3,GRK2,STC2,PCK1,SCN3A,RAI2,SLC19A2,PRNP,EGR2,GSTM1,SIVA1,ZBTB10,CDC7,RMDN2,FBXO32,TRERF1,INHBC,GADD45G,CXCL10,RGCC,PROC,ID4,FGFR3,FERMT2,ITM2C,BTG2,HSPB8,FHL1,HSPB1,HERPUD1,NADK2,TIMP3,STUM,HGFAC,RMI2,TMEM150A,GPX3,COPZ2,PRODH2,PARD3B,GPRC5B,ALDH1A1,AGXT,DCTPP1,SCN4B,MGLL,MCM2,SLC43A1,NEXN,PRELP,THBS1,SLC7A2,AURKB,RASD1,SH3BP1,TCEAL1,ATOH8,LRIG1,IL33,GSN,CYP4B1,KLF4,ALDH4A1,NFIB,ACKR3,FOSB,COQ8A,CDO1","814","714.7","","Klf15","false","false","","Unclustered","3.076923076923077","Unclustered","3.076923076923077","ENSMUSG00000030087"
"869","","",,,"Cluster 2","Ret","false","false","","Unclustered","6.0","Clustered","7.0","ENSMUSG00000030110"
"864","","",,,"Cluster 2","Rtn2","false","false","","Unclustered","4.285714285714286","Clustered","7.0","ENSMUSG00000030401"
"862","","",,,"","Sytl2","false","false","","Unclustered","4.0","Unclustered","7.0","ENSMUSG00000030616"
"860","","",,,"","Lyve1","false","false","","Unclustered","2.4000000000000004","Unclustered","4.166666666666667","ENSMUSG00000030787"
"858","","",,,"","Rrm1","false","false","","Unclustered","5.0","Unclustered","7.0","ENSMUSG00000030978"
"857","","",,,"","Syp","false","false","","Unclustered","2.0","Unclustered","3.0","ENSMUSG00000031144"
"856","","",,,"","Ccdc120","false","false","","Unclustered","2.0","Unclustered","3.0","ENSMUSG00000031150"
"855","","",,,"","Awat2","false","false","","Unclustered","6.0","Unclustered","6.0","ENSMUSG00000031220"
"854","","",,,"","Magee1","false","false","","Unclustered","2.0","Unclustered","3.0","ENSMUSG00000031227"
"853","","",,,"Cluster 1","Cenpi","false","false","","Unclustered","6.0","Clustered","9.0","ENSMUSG00000031262"
"852","","",,,"Cluster 2","Pak3","false","false","","Unclustered","3.7333333333333334","Clustered","7.0","ENSMUSG00000031284"
"851","","",,,"","Arhgap6","false","false","","Unclustered","2.0","Unclustered","3.0","ENSMUSG00000031355"
"850","","",,,"Cluster 1","Car5b","false","false","","Unclustered","5.0","Clustered","9.0","ENSMUSG00000031373"
"849","","",,,"","Renbp","false","false","","Unclustered","2.0","Unclustered","3.0","ENSMUSG00000031387"
"848","","",,,"","Nxf7","false","false","","Unclustered","5.0","Unclustered","6.0","ENSMUSG00000031410"
"847","","",,,"Cluster 1","Slit2","false","false","","Unclustered","5.785714285714286","Clustered","9.0","ENSMUSG00000031558"
"846","","",,,"","Dctd","false","false","","Unclustered","5.0","Unclustered","5.428571428571429","ENSMUSG00000031562"
"845","","",,,"","Sorbs2","false","false","","Unclustered","6.0","Unclustered","6.5","ENSMUSG00000031626"
"844","","",,,"","Gins3","false","false","","Unclustered","4.761904761904762","Unclustered","5.7142857142857135","ENSMUSG00000031669"
"843","","",,,"Cluster 4","Cx3cl1","false","false","","Unclustered","6.377777777777777","Clustered","6.051282051282051","ENSMUSG00000031778"
"840","","",,,"","Tmed6","false","false","","Unclustered","3.0","Unclustered","2.4000000000000004","ENSMUSG00000031919"
"839","","",,,"Cluster 2","Agt","false","false","","Unclustered","6.1090909090909085","Clustered","7.288888888888889","ENSMUSG00000031980"
"837","ARCHS4 Coexpression,813;Enrichr Queries,173;GTEx Coexpression,483","FOXA1,FCGBP,EHF,ANKRD35,RORA,CWH43,NR3C1,CLDN1,ETS1,CCND1,LIPH,CHEK2,DPYSL3,MYB,LIPK,TNS4,SH2D6,TGM2,IGFBP3,TTC7B,FAM227A,ZC2HC1C,CLDN4,SCNN1A,LGALS12,PADI2,COL17A1,SDC4,ILDR1,GPR85,PLA2G3,CACNA1A,LPL,FBXO48,APCDD1,FUT2,ALDH3B2,TRPM2,FAM221A,KLC3,SCIN,SCUBE1,RDH12,GALR1,WNT3,RAB11FIP4,NXNL2,ZBTB7C,BARD1,PRNP,TMEM86A,EGR2,TGFB2,SLC14A2,GSDMA,CADM1,VDR,TRPV3,ESRRG,DCLK1,FOSL1,CXCL10,EFNA3,GJB2,GJB3,LYPD6B,SP6,ID4,SDC1,ALPL,XAF1,FGFR3,TRIM72,BTG2,ATP2A3,HSPB1,TFCP2L1,SDR16C5,C1QTNF1,MECOM,PLEKHN1,FGFBP1,GPX3,TNFRSF19,PAX6,IL17RE,PROX1,ETV4,ZDHHC15,RIPPLY3,IRF1,KIT,ASPA,OPRD1,ASCL2,THBS1,AURKB,PTGS1,RHD,ABLIM1,NT5E,PDE11A,RNF39,SPTSSB,MPZL2,PLA2G2F,GCH1,SUSD2,IRX4,AHNAK2,LHFPL5,KRT10,KLF4,SORL1,MGAT4C,NFIB,KRT15,TRIM35,FOSB,CENPP","489","489.7","","Pou2f3","false","false","","Unclustered","4.0","Unclustered","5.0","ENSMUSG00000032015"
"836","","",,,"Cluster 1","Grik4","false","false","","Unclustered","5.5","Clustered","9.0","ENSMUSG00000032017"
"835","","",,,"","Kcnj5","false","false","","Unclustered","2.7","Unclustered","5.0","ENSMUSG00000032034"
"832","","",,,"Cluster 2","Chek1","false","false","","Unclustered","5.0","Clustered","7.0","ENSMUSG00000032113"
"831","","",,,"","Tmod2","false","false","","Unclustered","4.0","Unclustered","4.0","ENSMUSG00000032186"
"827","","",,,"","Thsd4","false","false","","Unclustered","2.7","Unclustered","2.7","ENSMUSG00000032289"
"826","","",,,"","Cyp1a1","false","false","","Unclustered","5.0","Unclustered","5.0","ENSMUSG00000032315"
"825","","",,,"","Ooep","false","false","","Unclustered","4.0","Unclustered","7.0","ENSMUSG00000032346"
"824","","",,,"Cluster 2","Tipin","false","false","","Unclustered","5.785714285714286","Clustered","6.75","ENSMUSG00000032397"
"823","","",,,"","Rwdd2a","false","false","","Unclustered","0.0","Unclustered","0.0","ENSMUSG00000032417"
"822","","",,,"Cluster 1","Nt5e","false","false","","Unclustered","5.0","Clustered","9.0","ENSMUSG00000032420"
"821","","",,,"","Cspg5","false","false","","Unclustered","3.0","Unclustered","5.0","ENSMUSG00000032482"
"820","","",,,"Cluster 1","Stac","false","false","","Unclustered","4.761904761904762","Clustered","9.0","ENSMUSG00000032502"
"818","","",,,"","Nphp3","false","false","","Unclustered","2.0","Unclustered","3.0","ENSMUSG00000032558"
"817","","",,,"","Traip","false","false","","Unclustered","3.0","Unclustered","3.0","ENSMUSG00000032586"
"816","","",,,"Cluster 1","Rspo4","false","false","","Unclustered","6.0","Clustered","9.0","ENSMUSG00000032852"
"815","","",,,"Cluster 1","Ugt8a","false","false","","Unclustered","6.0","Clustered","9.0","ENSMUSG00000032854"
"814","","",,,"Cluster 2","Cdo1","false","false","","Unclustered","6.0","Clustered","7.0","ENSMUSG00000033022"
"812","","",,,"Cluster 2","Tmprss7","false","false","","Unclustered","5.785714285714286","Clustered","6.75","ENSMUSG00000033177"
"811","","",,,"","Tpsg1","false","false","","Unclustered","3.0","Unclustered","3.0","ENSMUSG00000033200"
"809","","",,,"","Arhgap44","false","false","","Unclustered","2.0","Unclustered","3.0","ENSMUSG00000033389"
"808","","",,,"Cluster 1","Fa2h","false","false","","Unclustered","5.2","Clustered","9.0","ENSMUSG00000033579"
"807","","",,,"Cluster 2","Myo5c","false","false","","Unclustered","5.0","Clustered","7.0","ENSMUSG00000033590"
"806","","",,,"","Nat8f2","false","false","","Unclustered","0.0","Unclustered","0.0","ENSMUSG00000033634"
"805","","",,,"Cluster 2","Mtss1l","false","false","","Unclustered","5.0","Clustered","7.0","ENSMUSG00000033763"
"800","","",,,"Cluster 1","Ccdc15","false","false","","Unclustered","5.5","Clustered","9.0","ENSMUSG00000034303"
"798","","",,,"","Hsd17b13","false","false","","Unclustered","6.0","Unclustered","5.357142857142858","ENSMUSG00000034528"
"797","","",,,"Cluster 2","Lrrn1","false","false","","Unclustered","5.5","Clustered","7.333333333333333","ENSMUSG00000034648"
"795","","",,,"","Dbn1","false","false","","Unclustered","6.0","Unclustered","6.0","ENSMUSG00000034675"
"794","","",,,"","Gpr142","false","false","","Unclustered","5.0","Unclustered","7.0","ENSMUSG00000034677"
"793","","",,,"Cluster 2","Dio1","false","false","","Unclustered","3.4285714285714284","Clustered","7.0","ENSMUSG00000034785"
"792","","",,,"","Chrnb4","false","false","","Unclustered","4.0","Unclustered","7.0","ENSMUSG00000035200"
"791","ARCHS4 Coexpression,65;Enrichr Queries,88;GTEx Coexpression,680","FOXA1,RAB3B,RAB3C,RASL11B,ACSM3,TUSC3,RORA,ETS1,HS6ST2,RGS4,NUDT10,SCGN,RGS2,DPYSL2,DPYSL3,STMN1,AP1S2,DPF3,PLXNC1,CHGB,EPHA4,TMEM178B,DAPK1,IGFBP3,KCNK16,TM4SF4,SYTL4,ISL1,MSH6,EML5,RFX6,LMX1A,MAP1B,RBP1,LGALS12,TYRO3,SCG5,SCG3,LMX1B,SCG2,BEX2,GIPR,MAGED1,GPR119,CACNA1A,NREP,CPLX2,CACNA1H,NEUROD1,MAP2,NXPH1,NPTX2,TAC1,RAI2,NKX2-2,MARK1,GSTM4,FZD3,EGR2,SYT1,CADM1,SPHKAP,BDNF,SLC16A12,DNAJC12,INHBB,ESRRG,MCC,DCLK1,ST18,GADD45G,REEP1,CXCL10,KLHDC8A,BAMBI,ID4,CPE,FXYD6,GNB5,XKR4,PAM,CD200,ITM2C,SNAP25,CNTNAP2,PCSK1,BTG2,TENM4,CELF2,PTPRN,WFIKKN2,SCML2,C1QTNF1,TUBA1A,MECOM,UCN3,DNER,TIMP3,NEFM,FFAR1,PEG3,TRPC4,GPX3,ETV1,PAX6,PROX1,CBFA2T3,SYNGR4,CNKSR2,VGF,KIT,ALDH1A1,KCNMA1,CAMK2B,RGS17,CRMP1,LRP3,ADCY1,THBS1,CXXC4,SLC7A2,AURKB,RASD1,GNG2,GNG4,CAMK2N1,TCEAL1,LRIG1,SPOCK1,MSX1,SLIT2,PAK3,HES5,RUNX1T1,CHGA,GCH1,KCNB1,PCDH8,CADPS,SYT14,GCG,PNMA2,MBOAT4,KLF4,DLK1,TTC39A,TTC8,GSTA4,ABI2,MORN4,SST,NFIB,ASXL3,IMPDH2,SMOC1,KLHL7,QPCT,RIMBP2,FOSB,VIM,INSM1,SSBP2","185","277.7","","Arx","false","false","","Unclustered","4.464285714285714","Unclustered","5.357142857142858","ENSMUSG00000035277"
"790","","",,,"Cluster 2","Brsk1","false","false","","Unclustered","5.5","Clustered","7.333333333333333","ENSMUSG00000035390"
"789","","",,,"Cluster 2","Sstr1","false","false","","Unclustered","5.066666666666666","Clustered","6.7555555555555555","ENSMUSG00000035431"
"788","","",,,"Cluster 1","Frmpd1","false","false","","Unclustered","5.785714285714286","Clustered","9.0","ENSMUSG00000035615"
"786","","",,,"","Slc51a","false","false","","Unclustered","5.0","Unclustered","7.0","ENSMUSG00000035699"
"785","","",,,"","Krt20","false","false","","Unclustered","4.0","Unclustered","5.0","ENSMUSG00000035775"
"784","","",,,"","Rnase1","false","false","","Unclustered","6.0","Unclustered","7.0","ENSMUSG00000035896"
"783","","",,,"","Nme5","false","false","","Unclustered","2.4000000000000004","Unclustered","3.6","ENSMUSG00000035984"
"782","","",,,"Cluster 2","Fmnl2","false","false","","Unclustered","4.166666666666667","Clustered","7.0","ENSMUSG00000036053"
"781","","",,,"","Kctd1","false","false","","Unclustered","3.0","Unclustered","5.0","ENSMUSG00000036225"
"780","","",,,"Cluster 2","Zdhhc23","false","false","","Unclustered","6.0","Clustered","7.0","ENSMUSG00000036304"
"779","","",,,"","Qsox2","false","false","","Unclustered","4.761904761904762","Unclustered","7.0","ENSMUSG00000036327"
"778","","",,,"","Npy1r","false","false","","Unclustered","6.0","Unclustered","6.0","ENSMUSG00000036437"
"777","","",,,"","Rnf39","false","false","","Unclustered","4.0","Unclustered","3.466666666666667","ENSMUSG00000036492"
"776","","",,,"Cluster 2","Dner","false","false","","Unclustered","4.761904761904762","Clustered","7.0","ENSMUSG00000036766"
"775","","",,,"","Klhl13","false","false","","Unclustered","4.0","Unclustered","5.0","ENSMUSG00000036782"
"774","","",,,"","Abcc12","false","false","","Unclustered","4.0","Unclustered","5.0","ENSMUSG00000036872"
"772","","",,,"Cluster 1","Trim3","false","false","","Unclustered","6.0","Clustered","9.0","ENSMUSG00000036989"
"770","","",,,"","Clca3b","false","false","","Unclustered","4.0","Unclustered","7.0","ENSMUSG00000037033"
"769","","",,,"Cluster 2","Inhbb","false","false","","Unclustered","5.0","Clustered","7.0","ENSMUSG00000037035"
"768","","",,,"Cluster 2","Fer1l6","false","false","","Unclustered","5.2","Clustered","7.333333333333333","ENSMUSG00000037106"
"767","","",,,"","Psd","false","false","","Unclustered","0.0","Unclustered","0.0","ENSMUSG00000037126"
"766","","",,,"Cluster 2","Gemin5","false","false","","Unclustered","4.0","Clustered","7.0","ENSMUSG00000037275"
"765","","",,,"","Dtl","false","false","","Unclustered","0.0","Unclustered","0.0","ENSMUSG00000037474"
"762","","",,,"Cluster 2","Kcnk2","false","false","","Unclustered","6.236363636363636","Clustered","8.018181818181818","ENSMUSG00000037624"
"761","","",,,"","Fermt2","false","false","","Unclustered","6.0","Unclustered","6.5","ENSMUSG00000037712"
"760","","",,,"","Ckap2","false","false","","Unclustered","4.0","Unclustered","5.0","ENSMUSG00000037725"
"759","","",,,"Cluster 1","Slc16a9","false","false","","Unclustered","6.0","Clustered","9.0","ENSMUSG00000037762"
"758","","",,,"","Dzip1l","false","false","","Unclustered","5.0","Unclustered","5.0","ENSMUSG00000037784"
"757","","",,,"","Cpe","false","false","","Unclustered","6.0","Unclustered","7.0","ENSMUSG00000037852"
"756","","",,,"","Crp","false","false","","Unclustered","5.0","Unclustered","7.0","ENSMUSG00000037942"
"755","","",,,"","Rflna","false","false","","Unclustered","6.0","Unclustered","6.5","ENSMUSG00000037962"
"754","","",,,"Cluster 2","Ccdc129","false","false","","Unclustered","5.0","Clustered","7.0","ENSMUSG00000037973"
"753","","",,,"","Itln1","false","false","","Unclustered","3.0","Unclustered","3.0","ENSMUSG00000038209"
"752","","",,,"","Galnt18","false","false","","Unclustered","5.571428571428571","Unclustered","6.027777777777779","ENSMUSG00000038296"
"751","","",,,"","Spats2l","false","false","","Unclustered","4.0","Unclustered","7.0","ENSMUSG00000038305"
"749","","",,,"Cluster 2","Reep2","false","false","","Unclustered","5.785714285714286","Clustered","6.75","ENSMUSG00000038555"
"748","ARCHS4 Coexpression,752;Enrichr Queries,590;GTEx Coexpression,543","ANKRD35,RORA,CWH43,CLDN1,CCND1,DPYSL2,MYC,CREB3L1,CHEK2,LIPG,LIPK,TNS4,TGM2,IER3,PDIA3,IGFBP4,IGFBP3,CLDN4,LGALS12,SLCO2A1,TYRO3,NUPR1,COL17A1,SEMA7A,SDC4,PLA2G3,CACNA1A,FOXO6,APCDD1,FUT4,RHOBTB1,ALDH3B2,KLC3,RDH12,PODXL,CYP11A1,STC2,WNT3,MYH7B,NGFR,TMEM86A,EGR2,TGFB2,GSDMA,VDR,TRPV3,MT4,POU2F3,GADD45G,ARHGAP23,FOSL1,BMP4,CXCL10,EFNA3,GJB2,GJB3,BAMBI,LYPD6B,SDC1,AMOTL2,FGFR3,CDKN1C,KCNK6,PTPRU,BTG2,CCDC120,HSPB8,TDRP,NRARP,LFNG,SDR16C5,C1QTNF1,MYBL2,PLEKHN1,A4GALT,TEAD4,CLUH,PLAUR,IL17RE,WNT9A,AXIN2,ETV4,SAPCD2,MMP15,KIFC1,RHOV,GPRC5C,MGLL,LAMA4,RGS16,THBS1,AURKB,NT5E,P2RY6,RASD1,RNF39,LRIG1,KLRG2,SPTSSB,MSX1,MPZL2,PLA2G2F,IRX4,AHNAK2,ARID3A,KRT10,KLF4,TRIM35,FOSB,CENPP","699","628.3","Cluster 1","Sp6","false","false","","Unclustered","8.0","Clustered","9.0","ENSMUSG00000038560"
"745","","",,,"Cluster 2","Fanci","false","false","","Unclustered","6.0","Clustered","7.0","ENSMUSG00000039187"
"744","","",,,"","Atf7ip2","false","false","","Unclustered","3.0","Unclustered","3.0","ENSMUSG00000039200"
"743","","",,,"Cluster 1","Neil3","false","false","","Unclustered","5.785714285714286","Clustered","9.0","ENSMUSG00000039396"
"742","","",,,"Cluster 1","Rcan2","false","false","","Unclustered","4.761904761904762","Clustered","9.0","ENSMUSG00000039601"
"741","","",,,"","Strip2","false","false","","Unclustered","6.0","Unclustered","6.0","ENSMUSG00000039629"
"740","","",,,"","Exo1","false","false","","Unclustered","4.464285714285714","Unclustered","7.0","ENSMUSG00000039748"
"739","","",,,"","Cc2d2a","false","false","","Unclustered","4.0","Unclustered","5.0","ENSMUSG00000039765"
"738","","",,,"","Gabbr2","false","false","","Unclustered","4.761904761904762","Unclustered","7.0","ENSMUSG00000039809"
"736","","",,,"","Ptger3","false","false","","Unclustered","5.0","Unclustered","7.0","ENSMUSG00000040016"
"734","","",,,"","Rep15","false","false","","Unclustered","2.0","Unclustered","3.0","ENSMUSG00000040121"
"733","","",,,"Cluster 2","Thbs1","false","false","","Unclustered","6.0","Clustered","7.0","ENSMUSG00000040152"
"732","","",,,"Cluster 2","Fmo2","false","false","","Unclustered","4.285714285714286","Clustered","7.0","ENSMUSG00000040170"
"731","","",,,"","Fmo1","false","false","","Unclustered","5.0","Unclustered","7.0","ENSMUSG00000040181"
"730","","",,,"","Klhl32","false","false","","Unclustered","3.7333333333333334","Unclustered","4.666666666666667","ENSMUSG00000040387"
"729","","",,,"","Wdr47","false","false","","Unclustered","5.0","Unclustered","7.0","ENSMUSG00000040389"
"727","","",,,"","Abcb1a","false","false","","Unclustered","5.0","Unclustered","7.0","ENSMUSG00000040584"
"726","","",,,"Cluster 1","Apobec1","false","false","","Unclustered","5.785714285714286","Clustered","9.0","ENSMUSG00000040613"
"725","","",,,"Cluster 2","Apobec2","false","false","","Unclustered","6.0","Clustered","7.0","ENSMUSG00000040694"
"724","","",,,"","Klc3","false","false","","Unclustered","4.761904761904762","Unclustered","5.7142857142857135","ENSMUSG00000040714"
"723","ARCHS4 Coexpression,481;Enrichr Queries,359;GTEx Coexpression,175","FOXA1,STEAP3,EHF,ACSM3,GLDC,RORA,ETS1,TMEM92,LGALS3,CCND1,CREB3L1,MYC,CHEK2,RASSF6,HABP2,TGM2,IER3,SPINK4,CPA2,KIRREL2,G6PC,IGFBP4,IGFBP3,CTRB1,SERPINF2,IGFBP2,DIO1,ANXA10,RNASE4,BHLHA15,TM4SF4,SDCBP2,PDIA5,OVOL2,CLDN6,PLPP5,CLDN4,RBP4,CLPS,TFR2,IGFALS,CYP2E1,ZG16,CFTR,NGEF,CPB2,SDC4,SLC41A2,UBA5,FUT1,CRACR2B,CLCA1,PCK1,PRNP,AMBP,SLC33A1,EIF2AK3,NR0B2,INHBC,FOSL1,CXCL10,DAP,GJB2,PROC,GGCX,BAMBI,LYPD6B,PPP1R1B,CYP1A1,SDC1,ALPL,FGFR3,ITM2C,FKBP11,PNLIPRP1,COL18A1,HSPB1,TFCP2L1,KRT20,HERPUD1,NADK2,HHEX,SERP1,C1QTNF1,MECOM,TMED6,HGFAC,ARG1,F2,ETV4,PRODH2,NR5A2,TUBB2A,MMP15,ALDH1A1,KIT,TFF3,BIRC5,ANG,CDHR5,CHST4,AGXT,FBP1,GPRC5C,SGK2,DDC,GLS2,SLC43A1,PALM3,FAM129A,AURKB,RASD1,SLC17A9,HSD17B2,AGR2,LRIG1,SPDEF,MPZL2,CYB5A,GCH1,SYVN1,KLF4,FMO5,DLK1,GUCA2A,AGT,ALDH4A1,SGSM3,GSTA2,A4GNT,SMOC1,GSTA1,FOSB,OTC","248","338.3","","Foxa3","false","false","","Unclustered","1.7058823529411764","Unclustered","1.7058823529411764","ENSMUSG00000040891"
"722","","",,,"Cluster 1","Igsf21","false","false","","Unclustered","6.377777777777777","Clustered","9.0","ENSMUSG00000040972"
"721","","",,,"","Trim62","false","false","","Unclustered","4.166666666666667","Unclustered","5.0","ENSMUSG00000041000"
"720","","",,,"","Car8","false","false","","Unclustered","6.0","Unclustered","6.0","ENSMUSG00000041261"
"718","","",,,"","Cftr","false","false","","Unclustered","2.0","Unclustered","3.0","ENSMUSG00000041301"
"717","","",,,"","Ak7","false","false","","Unclustered","2.0","Unclustered","3.0","ENSMUSG00000041323"
"715","","",,,"","BC055324","false","false","","Unclustered","2.0","Unclustered","3.0","ENSMUSG00000041406"
"713","","",,,"","Smpx","false","false","","Unclustered","2.7","Unclustered","2.7","ENSMUSG00000041476"
"712","","",,,"Cluster 1","Prelp","false","false","","Unclustered","5.5","Clustered","9.0","ENSMUSG00000041577"
"711","","",,,"Cluster 2","Entpd3","false","false","","Unclustered","5.0","Clustered","7.0","ENSMUSG00000041608"
"710","","",,,"","Rragb","false","false","","Unclustered","4.464285714285714","Unclustered","5.357142857142858","ENSMUSG00000041658"
"708","","",,,"Cluster 1","Coro2b","false","false","","Unclustered","8.0","Clustered","8.6","ENSMUSG00000041729"
"707","","",,,"","Kirrel","false","false","","Unclustered","5.0","Unclustered","7.0","ENSMUSG00000041734"
"706","","",,,"Cluster 2","Myrip","false","false","","Unclustered","4.464285714285714","Clustered","7.0","ENSMUSG00000041794"
"704","","",,,"Cluster 2","Shisa4","false","false","","Unclustered","6.0","Clustered","7.0","ENSMUSG00000041889"
"703","","",,,"","Spidr","false","false","","Unclustered","5.0","Unclustered","7.0","ENSMUSG00000041974"
"701","","",,,"","Pnliprp1","false","false","","Unclustered","5.785714285714286","Unclustered","6.222222222222221","ENSMUSG00000042179"
"700","","",,,"Cluster 1","Bag2","false","false","","Unclustered","6.0","Clustered","9.0","ENSMUSG00000042215"
"699","","",,,"Cluster 1","Sgsm3","false","false","","Unclustered","7.418181818181818","Clustered","8.6","ENSMUSG00000042303"
"698","","",,,"","S100a14","false","false","","Unclustered","3.7333333333333334","Unclustered","7.0","ENSMUSG00000042306"
"697","","",,,"Cluster 2","Slc5a10","false","false","","Unclustered","3.7333333333333334","Clustered","7.0","ENSMUSG00000042371"
"696","","",,,"Cluster 2","Mum1l1","false","false","","Unclustered","4.0","Clustered","7.0","ENSMUSG00000042515"
"695","","",,,"Cluster 1","Xkr7","false","false","","Unclustered","5.5","Clustered","9.0","ENSMUSG00000042631"
"694","","",,,"","Wbp5","false","false","","Unclustered","6.0","Unclustered","6.5","ENSMUSG00000042712"
"693","","",,,"","Bex2","false","false","","Unclustered","0.0","Unclustered","0.0","ENSMUSG00000042750"
"692","","",,,"Cluster 2","Maneal","false","false","","Unclustered","6.377777777777777","Clustered","7.288888888888889","ENSMUSG00000042763"
"689","","",,,"Cluster 1","Greb1l","false","false","","Unclustered","5.0","Clustered","9.0","ENSMUSG00000042942"
"687","","",,,"","Trpv3","false","false","","Unclustered","4.0","Unclustered","5.0","ENSMUSG00000043029"
"686","","",,,"","Tmem130","false","false","","Unclustered","3.0","Unclustered","3.0","ENSMUSG00000043388"
"684","","",,,"","Sptssb","false","false","","Unclustered","3.888888888888889","Unclustered","4.666666666666667","ENSMUSG00000043461"
"683","","",,,"Cluster 2","Adgrd1","false","false","","Unclustered","5.0","Clustered","7.0","ENSMUSG00000044017"
"682","","",,,"Cluster 2","Ccdc141","false","false","","Unclustered","5.0","Clustered","7.0","ENSMUSG00000044033"
"681","","",,,"","Mab21l3","false","false","","Unclustered","4.0","Unclustered","7.0","ENSMUSG00000044313"
"680","","",,,"","Fam46c","false","false","","Unclustered","3.0","Unclustered","4.0","ENSMUSG00000044468"
"677","","",,,"","Syt16","false","false","","Unclustered","4.761904761904762","Unclustered","7.0","ENSMUSG00000044912"
"676","","",,,"","Zc2hc1c","false","false","","Unclustered","2.0","Unclustered","2.0","ENSMUSG00000045064"
"675","","",,,"Cluster 2","Asxl3","false","false","","Unclustered","7.466666666666667","Clustered","8.018181818181818","ENSMUSG00000045215"
"674","","",,,"","Cenph","false","false","","Unclustered","4.0","Unclustered","5.0","ENSMUSG00000045273"
"673","","",,,"Cluster 1","Gpr20","false","false","","Unclustered","6.0","Clustered","9.0","ENSMUSG00000045281"
"672","","",,,"","Basp1","false","false","","Unclustered","2.0","Unclustered","2.0","ENSMUSG00000045763"
"670","","",,,"","Slitrk6","false","false","","Unclustered","4.0","Unclustered","5.0","ENSMUSG00000045871"
"669","","",,,"","C2cd4c","false","false","","Unclustered","3.466666666666667","Unclustered","3.466666666666667","ENSMUSG00000045912"
"668","","",,,"","Eid2","false","false","","Unclustered","4.166666666666667","Unclustered","6.25","ENSMUSG00000046058"
"666","ARCHS4 Coexpression,130;Enrichr Queries,95;GTEx Coexpression,510","IFITM3,SEMA5A,CD83,KLHL32,AQP4,IFIT3,LGALS3,PREX1,RGS2,CCND1,KIF5C,BASP1,DPYSL2,PALM,DPYSL3,ADORA1,TNR,PIP4K2A,DENND5A,PLXNC1,LZTS1,GLUL,IER3,IGFBP3,APLP1,IGFBP2,SHISA4,MYT1,MAPK8IP1,CLIP3,OLFM1,ACAP3,PLPP4,TYRO3,PADI2,SCG2,TSPYL4,CSF1R,KHDRBS3,NOTCH1,GPR85,CACNA1A,LPL,SLC1A3,APCDD1,PLA2G7,RAP1GAP,IGSF21,KIF3C,NPTX2,TAC1,RAB11FIP4,LHPP,NKX2-2,ASIC1,PRNP,GPR17,EGR2,DTNA,SYT1,MT3,GADD45G,GNAO1,CXCL10,FA2H,PEX5L,RCAN2,ID4,CSPG5,FXYD6,LRRN1,FGFR3,ITM2C,CDKN1C,BTG2,GRIK3,GRIK4,HSPB1,NRGN,TUBA1A,SLC22A17,DNER,TIMP2,TIMP3,EFHD1,KIF1A,CTSF,BCAS1,APC2,PCYT1B,PIANP,ROM1,FAM219A,ETV1,NAV1,ZDHHC14,GPRC5B,TUBB2A,VGF,MMP16,ALDH1A1,MMP17,ARHGEF4,AGXT,MGLL,CAMK2B,AMER2,PHLPP1,RGS16,CRMP1,AURKB,NCALD,DLL3,CAMK2N1,CARNS1,LRIG1,SLIT1,SPOCK1,NRIP3,NCAM2,HES5,GDF11,GSN,LINGO3,KCNIP3,PCDHGC4,PCDH8,LAPTM5,KLF4,SORL1,TUBB4A,TPPP3,NFASC,FMNL2,SYT11,SMOC1,FOSB,VIM,INSM1,TMEM229A,RAMP1","154","245.0","","Olig1","false","false","","Unclustered","6.0","Unclustered","6.5","ENSMUSG00000046160"
"665","","",,,"","Nxph1","false","false","","Unclustered","3.0","Unclustered","3.0","ENSMUSG00000046178"
"663","","",,,"","Rprml","false","false","","Unclustered","5.785714285714286","Unclustered","6.222222222222221","ENSMUSG00000046215"
"662","","",,,"","Ankle1","false","false","","Unclustered","6.0","Unclustered","6.027777777777779","ENSMUSG00000046295"
"661","","",,,"","Gjb2","false","false","","Unclustered","4.0","Unclustered","4.0","ENSMUSG00000046352"
"660","","",,,"","Rbp1","false","false","","Unclustered","4.0","Unclustered","7.0","ENSMUSG00000046402"
"659","","",,,"","Ppm1e","false","false","","Unclustered","3.0","Unclustered","5.0","ENSMUSG00000046442"
"658","","",,,"","Scn4b","false","false","","Unclustered","5.0","Unclustered","5.0","ENSMUSG00000046480"
"657","","",,,"Cluster 2","Lrrc8e","false","false","","Unclustered","5.0","Clustered","7.0","ENSMUSG00000046589"
"656","","",,,"Cluster 2","Vwa5b2","false","false","","Unclustered","4.761904761904762","Clustered","7.0","ENSMUSG00000046613"
"654","","",,,"","Lancl3","false","false","","Unclustered","3.0","Unclustered","5.0","ENSMUSG00000047344"
"652","","",,,"","Olfr1388","false","false","","Unclustered","4.761904761904762","Unclustered","7.0","ENSMUSG00000047702"
"651","","",,,"Cluster 2","Fcgbp","false","false","","Unclustered","5.0","Clustered","7.0","ENSMUSG00000047730"
"649","","",,,"","Prrg1","false","false","","Unclustered","4.0","Unclustered","7.0","ENSMUSG00000047996"
"648","","",,,"Cluster 1","Tenm4","false","false","","Unclustered","6.0","Clustered","9.0","ENSMUSG00000048078"
"647","","",,,"","Cracr2b","false","false","","Unclustered","4.0","Unclustered","5.0","ENSMUSG00000048200"
"646","","",,,"Cluster 1","Ric3","false","false","","Unclustered","6.0","Clustered","9.0","ENSMUSG00000048330"
"645","","",,,"","Pthlh","false","false","","Unclustered","4.761904761904762","Unclustered","4.761904761904762","ENSMUSG00000048776"
"644","","",,,"","Slc35e4","false","false","","Unclustered","2.0","Unclustered","3.0","ENSMUSG00000048807"
"643","","",,,"","Rimkla","false","false","","Unclustered","2.0","Unclustered","3.0","ENSMUSG00000048899"
"642","","",,,"Cluster 2","4930539E08Rik","false","false","","Unclustered","6.0","Clustered","7.0","ENSMUSG00000048905"
"641","","",,,"Cluster 1","Rnf24","false","false","","Unclustered","6.377777777777777","Clustered","9.0","ENSMUSG00000048911"
"640","","",,,"","Fut4","false","false","","Unclustered","2.7","Unclustered","5.0","ENSMUSG00000049307"
"639","","",,,"","Tceal1","false","false","","Unclustered","2.0","Unclustered","3.0","ENSMUSG00000049536"
"638","","",,,"","Gja4","false","false","","Unclustered","5.0","Unclustered","6.0","ENSMUSG00000050234"
"637","","",,,"","Neto1","false","false","","Unclustered","4.0","Unclustered","5.0","ENSMUSG00000050321"
"636","","",,,"","Sprr1a","false","false","","Unclustered","4.761904761904762","Unclustered","5.7142857142857135","ENSMUSG00000050359"
"635","","",,,"","Tcf19","false","false","","Unclustered","3.7333333333333334","Unclustered","5.0","ENSMUSG00000050410"
"634","","",,,"Cluster 1","Lypd6","false","false","","Unclustered","5.785714285714286","Clustered","9.0","ENSMUSG00000050447"
"633","","",,,"","Slc35d3","false","false","","Unclustered","2.0","Unclustered","2.0","ENSMUSG00000050473"
"632","","",,,"","Pcdh20","false","false","","Unclustered","2.7","Unclustered","3.6","ENSMUSG00000050505"
"631","","",,,"","Oprd1","false","false","","Unclustered","6.0","Unclustered","6.0","ENSMUSG00000050511"
"630","","",,,"","Cldn8","false","false","","Unclustered","4.0","Unclustered","4.0","ENSMUSG00000050520"
"629","","",,,"","Scg2","false","false","","Unclustered","2.7","Unclustered","5.0","ENSMUSG00000050711"
"628","","",,,"Cluster 1","Pgbd5","false","false","","Unclustered","5.785714285714286","Clustered","9.0","ENSMUSG00000050751"
"626","","",,,"Cluster 1","Olfr161","false","false","","Unclustered","5.0","Clustered","9.0","ENSMUSG00000051003"
"625","","",,,"Cluster 2","Gprc5c","false","false","","Unclustered","5.9393939393939394","Clustered","8.018181818181818","ENSMUSG00000051043"
"624","","",,,"Cluster 1","Lingo3","false","false","","Unclustered","5.785714285714286","Clustered","9.0","ENSMUSG00000051067"
"623","","",,,"","Gpr119","false","false","","Unclustered","3.7333333333333334","Unclustered","4.666666666666667","ENSMUSG00000051209"
"620","","",,,"Cluster 2","Arhgef39","false","false","","Unclustered","5.0","Clustered","7.0","ENSMUSG00000051517"
"619","","",,,"","Xkr4","false","false","","Unclustered","5.5","Unclustered","6.416666666666666","ENSMUSG00000051951"
"618","","",,,"","Casr","false","false","","Unclustered","5.785714285714286","Unclustered","6.5","ENSMUSG00000051980"
"617","","",,,"Cluster 2","Pard3b","false","false","","Unclustered","6.0","Clustered","7.0","ENSMUSG00000052062"
"616","","",,,"Cluster 2","Cd177","false","false","","Unclustered","5.0","Clustered","7.0","ENSMUSG00000052212"
"615","ARCHS4 Coexpression,1139;GTEx Coexpression,377","FKBP11,PNLIPRP1,PNLIPRP2,GMNN,ICA1,NOC2L,SLC4A4,HERPUD1,LFNG,SERP1,IMPA2,GRB10,LONP1,ITGB7,TMED6,CPA2,KIRREL2,CLUH,CTRB1,WDR31,KCNK16,PDIA6,DNAJC3,BACE1,PLPP5,NR5A2,CLPS,INCENP,RBP1,CHST4,CFTR,GPR119,SHMT2,UBA5,DERL3,SLC43A1,CRACR2B,DNAJB9,SPAG4,SLC33A1,EIF2AK3,SYVN1,LHFPL5,SLC16A12,GCG,MANF,IFT20,SLC4A8,DAP,GSTA2,CALR,NUCB2,FOXA3","879","758.0","Cluster 2","Bhlha15","false","false","","Unclustered","3.1619047619047618","Clustered","7.0285714285714285","ENSMUSG00000052271"
"614","","",,,"","B630019K06Rik","false","false","","Unclustered","4.0","Unclustered","4.0","ENSMUSG00000052364"
"613","","",,,"Cluster 1","Reep1","false","false","","Unclustered","6.0","Clustered","9.0","ENSMUSG00000052852"
"611","","",,,"Cluster 2","Hrh1","false","false","","Unclustered","5.0","Clustered","7.0","ENSMUSG00000053004"
"610","","",,,"","Brsk2","false","false","","Unclustered","4.0","Unclustered","5.0","ENSMUSG00000053046"
"609","","",,,"","Fes","false","false","","Unclustered","4.0","Unclustered","5.0","ENSMUSG00000053158"
"608","","",,,"","Raet1e","false","false","","Unclustered","5.0","Unclustered","4.285714285714286","ENSMUSG00000053219"
"607","","",,,"Cluster 2","Aldh1a1","false","false","","Unclustered","4.523809523809524","Clustered","7.0","ENSMUSG00000053279"
"606","","",,,"","Nrgn","false","false","","Unclustered","1.4","Unclustered","2.5","ENSMUSG00000053310"
"605","","",,,"","Nebl","false","false","","Unclustered","4.0","Unclustered","5.0","ENSMUSG00000053702"
"603","","",,,"","Adgrg4","false","false","","Unclustered","4.0","Unclustered","7.0","ENSMUSG00000053852"
"602","","",,,"","Tceal5","false","false","","Unclustered","2.0","Unclustered","3.0","ENSMUSG00000054034"
"601","","",,,"","Krt15","false","false","","Unclustered","2.7","Unclustered","5.0","ENSMUSG00000054146"
"600","","",,,"","Tmem62","false","false","","Unclustered","1.6666666666666667","Unclustered","3.0","ENSMUSG00000054484"
"597","","",,,"Cluster 2","Pm20d2","false","false","","Unclustered","5.785714285714286","Clustered","6.75","ENSMUSG00000054659"
"596","","",,,"Cluster 2","Mtnr1a","false","false","","Unclustered","5.5","Clustered","7.333333333333333","ENSMUSG00000054764"
"595","","",,,"Cluster 2","Afp","false","false","","Unclustered","5.785714285714286","Clustered","6.75","ENSMUSG00000054932"
"594","","",,,"","C1ra","false","false","","Unclustered","4.0","Unclustered","7.0","ENSMUSG00000055172"
"593","ARCHS4 Coexpression,1050;Enrichr Queries,523;GTEx Coexpression,614","SEMA5A,FOXA1,PROS1,GFI1,RORA,ETS1,SLC25A48,RGS2,RPS6KA6,CCND1,DPYSL2,MYC,CREB3L1,LIPH,MYB,THSD7A,PHLDA3,IER3,GAS2L3,IGFBP4,IGFBP3,ARID5B,HSPG2,ZC2HC1C,ADAM12,S100A6,HOXB3,ZG16,LMX1B,ENDOD1,ARHGAP19,GPR85,CACNA1A,IQGAP3,NEUROD1,NEUROD2,HRH1,NUAK1,SCUBE1,SCIN,IGFBP7,CLSPN,TSPAN1,SRGAP1,NGFR,PRNP,EGR2,CADM1,NFATC2,HMGA2,FOSL1,BMP4,CXCL10,ID4,FGFR3,ITM2C,CDKN1C,PTPRU,NRP1,BTG2,HSPB1,KRT20,C1QTNF1,SH3PXD2A,MECOM,TIMP2,GAL3ST2,SCARF2,DACT1,URAD,PAX6,PROX1,GFRA3,RHOC,ETV4,PARD3B,NR5A2,PLSCR4,GPRC5C,RGS16,PAPLN,FAM129A,LENG9,PRELP,ASCL2,THBS1,AURKB,RHD,PDE11A,CAMK2N1,ATOH8,NHS,LRIG1,MSX1,E2F8,CDKN2C,SYT14,ARID3A,KLF4,SORBS3,FMNL3,NOVA2,FOSB,VIM,FRYL","836","729.0","","Foxd2","false","false","","Unclustered","3.142857142857143","Unclustered","4.666666666666667","ENSMUSG00000055210"
"592","","",,,"Cluster 2","Epm2a","false","false","","Unclustered","4.761904761904762","Clustered","7.0","ENSMUSG00000055493"
"590","","",,,"","Olfr307","false","false","","Unclustered","3.0","Unclustered","4.0","ENSMUSG00000055610"
"588","","",,,"","Ces2a","false","false","","Unclustered","4.464285714285714","Unclustered","7.0","ENSMUSG00000055730"
"587","","",,,"","Ldoc1l","false","false","","Unclustered","6.0","Unclustered","6.027777777777779","ENSMUSG00000055745"
"586","","",,,"","Dnaaf3","false","false","","Unclustered","3.0","Unclustered","3.0","ENSMUSG00000055809"
"585","","",,,"","Izumo4","false","false","","Unclustered","6.0","Unclustered","6.5","ENSMUSG00000055862"
"584","","",,,"","Tmem150a","false","false","","Unclustered","4.0","Unclustered","4.333333333333334","ENSMUSG00000055912"
"582","","",,,"Cluster 2","Irs1","false","false","","Unclustered","5.2","Clustered","7.333333333333333","ENSMUSG00000055980"
"581","","",,,"","Cyp3a11","false","false","","Unclustered","3.7333333333333334","Unclustered","4.666666666666667","ENSMUSG00000056035"
"579","ARCHS4 Coexpression,838;Enrichr Queries,519;GTEx Coexpression,550","FOXA1,MDC1,IRS1,KLHL32,NOC2L,ETS1,SOGA1,CELSR3,LGALS3,RGS2,CCND1,DPYSL2,MYC,CHEK2,LIPG,DPYSL3,PIP4K2A,PDE8A,HOXA4,TGM2,IER3,TMEM88B,IGFBP4,IGFBP3,APLP1,IGFBP2,VASH1,ISL1,GPRIN1,ADAM12,RBP1,S100A6,HOXB4,PADI2,HOXB3,HOXB2,LMX1B,CACNA1A,DTX4,SCIN,STC2,PDGFC,RHBDL3,LHPP,NKX2-2,B4GALNT4,NGFR,PRNP,EGR2,TGFB2,BDNF,HMGA1,HMGA2,ST18,FOSL1,BMP4,ANLN,FA2H,CXCL10,PEX5L,BAMBI,FXYD2,LHX1,CDKN1C,GPSM1,CNTNAP2,NRP1,BTG2,HSPB1,FOXM1,LMNB1,TUBA1A,C1QTNF1,MECOM,DNER,TIMP3,BCAS1,CLUH,ROM1,PAX6,PROX1,AXIN2,ETV4,ZDHHC14,BACE1,VGF,SAPCD2,INCENP,KIFC1,CDH16,DBN1,PKN3,THBS1,GNAI1,AURKB,AGPAT4,NT5E,RASD1,CAMK2N1,NT5DC2,CARNS1,PRRG1,LRIG1,MSX1,GSN,KLF4,FMNL2,FOSB,VIM,FRYL","706","635.7","","Hoxb8","false","false","","Unclustered","4.464285714285714","Unclustered","6.25","ENSMUSG00000056648"
"578","","",,,"","Nbeal2","false","false","","Unclustered","3.0","Unclustered","5.0","ENSMUSG00000056724"
"576","","",,,"Cluster 1","Scn3a","false","false","","Unclustered","6.0","Clustered","9.0","ENSMUSG00000057182"
"575","","",,,"","Ces1c","false","false","","Unclustered","3.7333333333333334","Unclustered","7.0","ENSMUSG00000057400"
"573","","",,,"","Pus7","false","false","","Unclustered","3.0","Unclustered","5.0","ENSMUSG00000057541"
"572","","",,,"Cluster 2","Lmcd1","false","false","","Unclustered","3.4545454545454546","Clustered","7.0","ENSMUSG00000057604"
"571","","",,,"Cluster 2","Gnai1","false","false","","Unclustered","5.5","Clustered","6.75","ENSMUSG00000057614"
"569","","",,,"","Gsta2","false","false","","Unclustered","6.0","Unclustered","6.5","ENSMUSG00000057933"
"568","","",,,"","Trim31","false","false","","Unclustered","3.7333333333333334","Unclustered","4.666666666666667","ENSMUSG00000058063"
"567","","",,,"","Rrp1b","false","false","","Unclustered","4.0","Unclustered","5.0","ENSMUSG00000058392"
"566","","",,,"Cluster 2","Kcnt1","false","false","","Unclustered","6.0","Clustered","7.0","ENSMUSG00000058740"
"565","","",,,"","Mfsd4a","false","false","","Unclustered","5.785714285714286","Unclustered","6.222222222222221","ENSMUSG00000059149"
"564","","",,,"Cluster 2","Tmprss9","false","false","","Unclustered","6.0","Clustered","7.0","ENSMUSG00000059406"
"562","","",,,"","Defa17","false","false","","Unclustered","2.0","Unclustered","3.0","ENSMUSG00000060208"
"561","","",,,"","Eno3","false","false","","Unclustered","2.0","Unclustered","3.0","ENSMUSG00000060600"
"560","","",,,"","Ang4","false","false","","Unclustered","4.761904761904762","Unclustered","7.0","ENSMUSG00000060615"
"559","","",,,"Cluster 2","Slc4a4","false","false","","Unclustered","5.0","Clustered","7.0","ENSMUSG00000060961"
"558","","",,,"","Cyp3a59","false","false","","Unclustered","4.761904761904762","Unclustered","7.0","ENSMUSG00000061292"
"557","","",,,"Cluster 2","Obscn","false","false","","Unclustered","5.0","Clustered","7.0","ENSMUSG00000061462"
"556","","",,,"","Pclo","false","false","","Unclustered","4.0","Unclustered","5.0","ENSMUSG00000061601"
"555","","",,,"","Hs6st2","false","false","","Unclustered","5.0","Unclustered","7.0","ENSMUSG00000062184"
"553","","",,,"","Lhfpl5","false","false","","Unclustered","4.0","Unclustered","5.0","ENSMUSG00000062252"
"552","","",,,"","Hsd3b3","false","false","","Unclustered","4.761904761904762","Unclustered","7.0","ENSMUSG00000062410"
"551","","",,,"","Ces2f","false","false","","Unclustered","5.0","Unclustered","5.0","ENSMUSG00000062826"
"550","","",,,"","Ica1","false","false","","Unclustered","4.285714285714286","Unclustered","6.0","ENSMUSG00000062995"
"549","","",,,"Cluster 1","Kcnma1","false","false","","Unclustered","6.0","Clustered","9.0","ENSMUSG00000063142"
"548","","",,,"Cluster 2","Mapk15","false","false","","Unclustered","6.0","Clustered","7.0","ENSMUSG00000063704"
"547","","",,,"","Tnfrsf11b","false","false","","Unclustered","4.0","Unclustered","7.0","ENSMUSG00000063727"
"546","","",,,"","Rnf183","false","false","","Unclustered","3.7333333333333334","Unclustered","4.666666666666667","ENSMUSG00000063851"
"545","","",,,"","Cyp4a32","false","false","","Unclustered","2.7","Unclustered","3.6","ENSMUSG00000063929"
"544","","",,,"Cluster 2","Fbln2","false","false","","Unclustered","6.0","Clustered","7.0","ENSMUSG00000064080"
"543","","",,,"Cluster 2","Hcst","false","false","","Unclustered","4.761904761904762","Clustered","7.0","ENSMUSG00000064109"
"542","","",,,"","Izumo1","false","false","","Unclustered","4.0","Unclustered","5.0","ENSMUSG00000064158"
"541","","",,,"Cluster 2","Krt39","false","false","","Unclustered","6.0","Clustered","7.0","ENSMUSG00000064165"
"540","","",,,"","Ghrl","false","false","","Unclustered","4.0","Unclustered","4.0","ENSMUSG00000064177"
"539","","",,,"","Siva1","false","false","","Unclustered","4.761904761904762","Unclustered","6.533333333333333","ENSMUSG00000064326"
"538","","",,,"","Anks6","false","false","","Unclustered","3.238095238095238","Unclustered","4.0476190476190474","ENSMUSG00000066191"
"537","","",,,"","6030419C18Rik","false","false","","Unclustered","5.5","Unclustered","6.416666666666666","ENSMUSG00000066607"
"536","","",,,"Cluster 2","Khdc1a","false","false","","Unclustered","5.0","Clustered","7.0","ENSMUSG00000067750"
"535","","",,,"Cluster 2","Myl9","false","false","","Unclustered","5.785714285714286","Clustered","6.75","ENSMUSG00000067818"
"533","","",,,"","Shroom4","false","false","","Unclustered","4.0","Unclustered","4.0","ENSMUSG00000068270"
"532","","",,,"","Wfdc17","false","false","","Unclustered","4.0","Unclustered","5.0","ENSMUSG00000069792"
"531","","",,,"","B3gnt9","false","false","","Unclustered","3.7333333333333334","Unclustered","7.0","ENSMUSG00000069920"
"530","","",,,"","Ces3a","false","false","","Unclustered","5.0","Unclustered","4.928571428571429","ENSMUSG00000069922"
"529","ARCHS4 Coexpression,278;Enrichr Queries,682;GTEx Coexpression,486","DENND1C,IFITM3,CD40,NRROS,CD83,NCF2,DOCK8,AQP9,TNFAIP2,ITGAL,TMEM140,RCSD1,GIMAP6,ETS1,PIK3CG,IFIT3,GIMAP8,LIMD2,IFIT2,MILR1,LGALS3,PSTPIP1,RGS2,GLIPR1,RINL,ADGRE5,RASSF5,TNFSF10,FFAR2,TGM2,IER3,CD53,ZBP1,WARS,RSAD2,ANKRD44,MYOF,PLAUR,ARID5A,SERPINB9,VAV1,MPEG1,APBB1IP,FGR,HCK,IFI27,MFNG,OAS3,IRF1,IRF7,SERPING1,RIN3,TLR6,NUPR1,MCTP2,DOCK2,HCST,PLCB2,CARD11,AKNA,CCDC69,HVCN1,FAM129A,GMPR,NLRC3,THBS1,USP18,AURKB,TMEM71,PIK3R5,FGD2,ALOX5,INPP5D,ST8SIA4,GCH1,LAPTM5,ARID3A,ISG15,KLF4,SORL1,PARP12,ISG20,MOV10,CXCL10,FMNL1,ALOX5AP,VIM,TRIM38,XAF1,CD244,ITM2C","468","482.0","","Sp110","false","false","","Unclustered","0.0","Unclustered","0.0","ENSMUSG00000070034"
"528","","",,,"","Plpp4","false","false","","Unclustered","5.0","Unclustered","5.0","ENSMUSG00000070366"
"527","","",,,"","Olfr558","false","false","","Unclustered","0.6666666666666666","Unclustered","0.6666666666666666","ENSMUSG00000070423"
"526","","",,,"Cluster 1","Gm572","false","false","","Unclustered","5.0","Clustered","9.0","ENSMUSG00000070577"
"523","","",,,"","Akr1c19","false","false","","Unclustered","3.0","Unclustered","5.0","ENSMUSG00000071551"
"522","","",,,"","Cpa2","false","false","","Unclustered","5.0","Unclustered","5.428571428571429","ENSMUSG00000071553"
"521","","",,,"Cluster 2","Apcdd1","false","false","","Unclustered","6.0","Clustered","7.0","ENSMUSG00000071847"
"520","","",,,"","Mcc","false","false","","Unclustered","3.7333333333333334","Unclustered","4.666666666666667","ENSMUSG00000071856"
"518","ARCHS4 Coexpression,366;Enrichr Queries,187;GTEx Coexpression,685","SEMA5A,IRS1,DIXDC1,RORA,FRY,NR3C1,GIMAP6,ETS1,SLC4A4,SLC8A1,IGF1R,RGS2,CDH2,BASP1,DPYSL2,DPYSL3,GRB10,PLXNC1,EPHA4,MBNL1,CACNA2D1,ANKRD44,TMOD2,ARID5B,FRMD4A,TANC2,OVOL2,TIAM1,MAP1B,SCNN1A,LGALS12,COL8A1,KCTD12,MYL9,TRABD2B,CARD11,AKNA,ARHGEF25,RNF180,TCF7,GLIS3,ITPR2,CACNA1C,NREP,BAG2,MAP2,PDGFC,ST3GAL1,SCN3A,PRNP,FZD3,ATP8B2,CADM1,ZBTB10,CRIM1,DCLK1,ARHGAP24,FGF14,CDK6,RCAN2,PKIA,RCAN3,PDE3A,FAT4,IGSF9B,CDK14,FERMT2,ITM2C,NRP1,TENM4,CELF2,DOCK8,PDE3B,GPR20,PTPRM,SOBP,ITGAL,SYNE1,LBH,TUBA1A,SH3PXD2A,ANXA6,CEP170,CC2D2A,CAMK1D,DST,ITGA4,TRPC1,ETV1,NAV1,RHOC,PARD3B,PARP8,PLCB4,MMP16,SETBP1,TBC1D4,RASA3,KCNMA1,CDC42EP3,LCOR,PLCB1,CD63,FAM129A,NEXN,CRMP1,NLRC3,ADD3,THBS1,AURKB,ABLIM1,NT5E,GNG2,ALDH1B1,SPOCK2,LRIG1,SLIT2,RUNX1T1,CASP8AP2,SORBS2,KLF4,SORL1,GSTA4,ABI2,PIK3IP1,NFIB,SYT11,FRYL","356","412.7","","Klf12","false","false","","Unclustered","5.0","Unclustered","5.428571428571429","ENSMUSG00000072294"
"517","","",,,"Cluster 1","Zfp9","false","false","","Unclustered","6.0","Clustered","9.0","ENSMUSG00000072623"
"516","","",,,"","Ahnak2","false","false","","Unclustered","5.0","Unclustered","6.0","ENSMUSG00000072812"
"514","","",,,"","Gpr27","false","false","","Unclustered","5.0","Unclustered","7.0","ENSMUSG00000072875"
"513","","",,,"","Nudt10","false","false","","Unclustered","2.0","Unclustered","3.0","ENSMUSG00000073293"
"512","","",,,"","Pappa2","false","false","","Unclustered","4.464285714285714","Unclustered","5.357142857142858","ENSMUSG00000073530"
"511","","",,,"","Tmem88b","false","false","","Unclustered","3.0","Unclustered","5.0","ENSMUSG00000073680"
"510","","",,,"Cluster 2","Apitd1","false","false","","Unclustered","4.0","Clustered","7.0","ENSMUSG00000073705"
"509","","",,,"","Il11ra1","false","false","","Unclustered","5.0","Unclustered","4.285714285714286","ENSMUSG00000073889"
"508","","",,,"","B3gnt6","false","false","","Unclustered","5.0","Unclustered","7.0","ENSMUSG00000074004"
"507","","",,,"","Arhgap40","false","false","","Unclustered","4.761904761904762","Unclustered","6.533333333333333","ENSMUSG00000074625"
"505","","",,,"Cluster 1","Itpripl1","false","false","","Unclustered","4.761904761904762","Clustered","9.0","ENSMUSG00000074825"
"504","","",,,"","Zfp808","false","false","","Unclustered","0.0","Unclustered","0.0","ENSMUSG00000074867"
"503","","",,,"","Cyp2c68","false","false","","Unclustered","3.7333333333333334","Unclustered","4.666666666666667","ENSMUSG00000074882"
"501","","",,,"Cluster 1","Pde11a","false","false","","Unclustered","5.785714285714286","Clustered","9.0","ENSMUSG00000075270"
"500","","",,,"","Carns1","false","false","","Unclustered","4.0","Unclustered","5.0","ENSMUSG00000075289"
"499","","",,,"Cluster 1","Tmem92","false","false","","Unclustered","5.785714285714286","Clustered","9.0","ENSMUSG00000075610"
"498","","",,,"Cluster 2","Chml","false","false","","Unclustered","5.0","Clustered","7.0","ENSMUSG00000078185"
"497","","",,,"Cluster 2","Klhdc7a","false","false","","Unclustered","4.909090909090909","Clustered","6.933333333333334","ENSMUSG00000078234"
"496","","",,,"","Plekhn1","false","false","","Unclustered","3.0","Unclustered","2.4000000000000004","ENSMUSG00000078485"
"495","","",,,"","Gm13212","false","false","","Unclustered","3.0","Unclustered","4.0","ENSMUSG00000078502"
"494","","",,,"","Aunip","false","false","","Unclustered","0.0","Unclustered","0.0","ENSMUSG00000078521"
"493","","",,,"","9530053A07Rik","false","false","","Unclustered","4.0","Unclustered","5.0","ENSMUSG00000078776"
"492","","",,,"","Serpina1c","false","false","","Unclustered","5.0","Unclustered","5.0","ENSMUSG00000079015"
"491","ARCHS4 Coexpression,25;GTEx Coexpression,89","CHRM1,STMN3,RGS4,RIMS4,KIF5C,PALM,ADORA1,TNR,CCDC92,LZTS1,KCNH3,UNC5A,RBFOX3,TMOD2,APLP1,MAPK8IP2,RUNDC3A,TMEM130,MAPK8IP1,DKK3,CLIP3,OLFM1,ACAP3,MAP1A,SCG3,STX1A,NGEF,BRSK1,BRSK2,NDRG4,ARHGEF25,STXBP1,HPCA,AGAP2,C2CD4C,CPLX2,RAP1GAP,PDZD4,HRH3,MAP2,KIF3C,NPTX1,RAB6B,PACSIN1,TMEM132B,SYT7,GNAO1,DLG4,REEP2,CSPG5,FXYD6,FBXL2,SERPINI1,CNTNAP2,TMEM151B,NCAN,RASGRF1,DIRAS2,NRGN,JPH4,KCNT1,SLC22A17,GDAP1L1,IDS,KIF1A,SULT4A1,STUM,PSD,PCYT1B,PIANP,OLIG1,FAM219A,TUBG2,SYP,SYN2,SYN1,CIT,GPRC5B,PITPNM3,MMP17,ARHGEF4,MAPRE3,VAMP2,RAPGEF4,CAMK2B,NIM1K,SNX32,LRP3,ADCY1,PHYHIP,CAMK2N1,SV2A,SPOCK1,NCAM2,APBB1,GABRD,GABRA2,GABBR2,FAM189A1,CCK,FBXL16,MEIS3,TUBB4A,GRIN1,ABI2,MORN4,SYT11,NOVA2,APBA1","10","57.0","Cluster 2","Kcnip3","false","false","","Unclustered","5.0","Clustered","7.0","ENSMUSG00000079056"
"490","","",,,"","Gm13420","false","false","","Unclustered","5.0","Unclustered","6.0","ENSMUSG00000079497"
"488","","",,,"","Ctsf","false","false","","Unclustered","6.0","Unclustered","7.0","ENSMUSG00000083282"
"487","","",,,"","Mroh3","false","false","","Unclustered","3.0","Unclustered","5.0","ENSMUSG00000087230"
"486","","",,,"","Gm8113","false","false","","Unclustered","5.785714285714286","Unclustered","6.222222222222221","ENSMUSG00000089901"
"485","","",,,"Cluster 2","Lrrc10b","false","false","","Unclustered","4.761904761904762","Clustered","7.0","ENSMUSG00000090291"
"484","","",,,"","Vgll3","false","false","","Unclustered","5.785714285714286","Unclustered","6.222222222222221","ENSMUSG00000091243"
"483","","",,,"","Gimd1","false","false","","Unclustered","4.0","Unclustered","5.0","ENSMUSG00000091721"
"482","","",,,"","Scgb2b20","false","false","","Unclustered","0.0","Unclustered","0.0","ENSMUSG00000094305"
"480","","",,,"","Nim1k","false","false","","Unclustered","0.0","Unclustered","0.0","ENSMUSG00000095930"
"479","","",,,"Cluster 1","Kcnj11","false","false","","Unclustered","6.0","Clustered","9.0","ENSMUSG00000096146"
"478","","",,,"","Gm38303","false","false","","Unclustered","4.0","Unclustered","7.0","ENSMUSG00000103392"
"477","","",,,"Cluster 2","Gm3776","false","false","","Unclustered","4.761904761904762","Clustered","7.0","ENSMUSG00000111709"
"476","","",,,"","Sez6","false","false","","Unclustered","2.0","Unclustered","2.0","ENSMUSG00000000632"
"475","Literature ChIP-seq,91;ARCHS4 Coexpression,264;Enrichr Queries,222;GTEx Coexpression,475","IFITM3,EHF,ANKLE1,FAM89A,MKI67,C1GALT1C1,DPYSL2,MYC,GJA4,DPYSL3,STMN1,THSD7A,GLUL,CHGB,EPHA4,MBNL1,EPHA7,DAPK1,CACNA2D1,RNASE4,EML1,DKK3,MAP1B,SERPING1,HOXB3,KCTD12,ASF1B,TSHZ2,MGST2,SLCO5A1,NUAK1,RACGAP1,MAP2,FIGNL1,PDGFC,FAM43A,NXNL2,AFAP1L1,CADM1,DDIAS,TNFSF15,CDC7,DCLK1,ST18,UCK2,ID4,FXYD6,FAT4,FERMT2,ITM2C,TOP2A,NRP1,BTG2,WDR47,NRP2,TENM4,GRIK3,PTPRM,CX3CL1,TUBA1A,MECOM,EFCAB1,TIMP2,TIMP3,ZDHHC15,APBB1IP,BACE2,MN1,PLSCR4,KIT,KCNMA1,CKS2,SYNC,SMTNL2,GART,PDZRN3,MGLL,AMER2,PKN3,PELI2,SEZ6,SNX33,CAMK2N1,RAD54L,RUNX1T1,CENPU,GSN,MGMT,SUSD1,SORBS2,LHFPL2,MPHOSPH9,GSTA4,ETNK1,SGSM3,QPCT,AUNIP,COQ8A,CD83,IRS1,CHRM4,RORA,NR3C1,ETS1,IGF1R,AMOT,CCND1,CDH2,GRB10,PDE8A,TCP11,MYLIP,CASR,IGFBP4,KCNH7,IGFBP3,ARID5B,VRK1,FRMD4A,SDCBP2,SCNN1A,NOTCH3,CTTNBP2,NOTCH4,HTRA3,LPL,SLC1A3,NREP,ZFP36L2,CNN3,BCL2L11,IGFBP7,MYH10,SRGAP1,RAI2,MARK1,PRNP,TGFB2,CBX5,POU2F1,CAV2,VDR,CRIM1,HMGA1,ARHGAP29,CORO2B,DAP,CDK6,UBE2T,CPE,SPIRE1,AMOTL2,CNTNAP2,SNAP25,CELF2,HSPB1,RND3,LMNB1,CEP170,EGFL7,ARHGEF15,DST,HUNK,ETV1,NAV1,AXIN2,DYNAP,MMS22L,SETBP1,LCOR,LANCL3,SEMA3G,ADD3,THBS1,AURKB,DLL4,ABLIM1,CNR1,GNG4,ATOH8,E2F1,LRIG1,SLIT2,CYB5A,ARID3A,SYT14,KLF4,MAPK11,FAM167A,RAD51,ASXL3,NOVA2,VIM,SSBP2,UNC79","167","263.0","","Nfib","false","false","","Unclustered","5.0","Unclustered","5.0","ENSMUSG00000008575"
"474","","",,,"","Tppp3","false","false","","Unclustered","3.0","Unclustered","4.0","ENSMUSG00000014846"
"473","","",,,"","Tnr","false","false","","Unclustered","4.0","Unclustered","5.0","ENSMUSG00000015829"
"472","","",,,"","Dnah11","false","false","","Unclustered","2.7","Unclustered","2.7","ENSMUSG00000018581"
"471","","",,,"","Arhgef25","false","false","","Unclustered","0.0","Unclustered","0.0","ENSMUSG00000019467"
"470","","",,,"","Dock2","false","false","","Unclustered","5.785714285714286","Unclustered","6.75","ENSMUSG00000020143"
"469","","",,,"","Slc26a4","false","false","","Unclustered","4.0","Unclustered","5.0","ENSMUSG00000020651"
"468","","",,,"","Trpc7","false","false","","Unclustered","4.761904761904762","Unclustered","7.0","ENSMUSG00000021541"
"467","","",,,"Cluster 2","BC067074","false","false","","Unclustered","5.0","Clustered","7.0","ENSMUSG00000021763"
"466","","",,,"Cluster 2","Drd3","false","false","","Unclustered","5.571428571428571","Clustered","7.0","ENSMUSG00000022705"
"465","","",,,"","Cxcl13","false","false","","Unclustered","2.4000000000000004","Unclustered","3.6","ENSMUSG00000023078"
"464","","",,,"","Cldn6","false","false","","Unclustered","4.761904761904762","Unclustered","5.428571428571429","ENSMUSG00000023906"
"463","","",,,"","Qpct","false","false","","Unclustered","4.0","Unclustered","7.0","ENSMUSG00000024084"
"462","","",,,"","Ms4a8a","false","false","","Unclustered","4.0","Unclustered","5.0","ENSMUSG00000024730"
"461","","",,,"","Rbp4","false","false","","Unclustered","6.0","Unclustered","6.0","ENSMUSG00000024990"
"460","","",,,"","Shmt2","false","false","","Unclustered","4.0","Unclustered","5.0","ENSMUSG00000025403"
"459","","",,,"","Cdhr5","false","false","","Unclustered","4.0","Unclustered","5.0","ENSMUSG00000025497"
"458","","",,,"","2010106E10Rik","false","false","","Unclustered","3.0","Unclustered","5.0","ENSMUSG00000025528"
"457","ARCHS4 Coexpression,63;Enrichr Queries,138;GTEx Coexpression,237","SEMA5A,RAB3C,CHRM1,STMN3,SLC8A1,HS6ST2,RGS4,SYNPR,SCGN,RIMS4,KIF5C,DPYSL2,CHEK2,STMN1,THSD7A,SH2D5,RGS7,CASR,ENTPD3,CACNA2D1,TMOD2,ACSL6,CPT1C,TMEM130,RUNDC3A,DISP2,MAP1B,MAP1A,LGALS12,SCG3,TSPYL4,BEX2,STXBP1,TSHZ2,CACNA1B,CACNA1A,LPL,CACNA1C,KLHL13,NREP,MAP2,MAP6,KIF3C,SCN3B,NPTX2,TAC1,RAB6B,SCN3A,PACSIN1,ATP6V0A1,FZD3,MAGEE1,SPHKAP,SYT1,CADM1,BDNF,ST8SIA3,DNAJC12,ESRRG,DCLK1,ST18,GNAO1,REEP1,SDK1,PEX5L,PLCXD3,FGF14,DLG4,PKIA,RCAN2,CPE,FXYD6,SERPINI1,XKR4,CD200,CNTNAP2,SNAP25,PTPRU,PCSK1,TENM4,CELF2,PTPRN,CELF5,ARHGAP6,JPH4,UNC80,PCLO,TUBA1A,NETO1,MECOM,GDAP1L1,DNER,IDS,NEFM,SULT4A1,PSD,KRT222,PIANP,ACTL6B,ABCC8,PAX6,SYN2,CIT,CNKSR2,MN1,TUBB2A,MMP17,KIT,KCNMA1,PLCB1,PDZRN3,RAPGEF4,CAMK2B,PRUNE2,CRMP1,SNX32,ADCY1,PPM1E,AURKB,NCALD,DLL3,GNG2,GNG4,WIF1,SV2A,CAMK2N1,LRIG1,NCAM2,SLIT2,WASF1,PAK3,CCDC184,RUNX1T1,GABRA2,CHGA,PCDH8,CADPS,SYT16,SYT14,PNMA2,FBXL16,SYT13,DLK1,GRIN1,STXBP5L,MGAT4C,SLC4A8,ABI2,MORN4,GSTA4,SYT11,FKBP1B,APBA1,INSM1,SSBP2,KCNK2","66","146.0","","Dach2","false","false","","Unclustered","2.0","Unclustered","3.0","ENSMUSG00000025592"
"456","","",,,"","Rps6ka6","false","false","","Unclustered","3.0","Unclustered","5.0","ENSMUSG00000025665"
"455","","",,,"","Ptprn","false","false","","Unclustered","3.0","Unclustered","3.0","ENSMUSG00000026204"
"454","","",,,"Cluster 2","Itm2c","false","false","","Unclustered","6.0","Clustered","7.0","ENSMUSG00000026223"
"453","","",,,"","Steap3","false","false","","Unclustered","4.0","Unclustered","5.0","ENSMUSG00000026389"
"452","","",,,"","Avpr1b","false","false","","Unclustered","5.0","Unclustered","6.0","ENSMUSG00000026432"
"451","","",,,"","Coq8a","false","false","","Unclustered","4.0","Unclustered","5.0","ENSMUSG00000026489"
"450","","",,,"","Mptx1","false","false","","Unclustered","3.0","Unclustered","5.0","ENSMUSG00000026531"
"449","","",,,"","Ltk","false","false","","Unclustered","0.0","Unclustered","0.0","ENSMUSG00000027297"
"448","","",,,"","Chgb","false","false","","Unclustered","3.0","Unclustered","2.4000000000000004","ENSMUSG00000027350"
"447","","",,,"","Clca3a2","false","false","","Unclustered","4.0","Unclustered","5.0","ENSMUSG00000028262"
"446","","",,,"","Kif24","false","false","","Unclustered","1.7142857142857142","Unclustered","1.7142857142857142","ENSMUSG00000028438"
"445","","",,,"","Cyp4b1","false","false","","Unclustered","4.0","Unclustered","5.0","ENSMUSG00000028713"
"444","","",,,"Cluster 2","Xrcc2","false","false","","Unclustered","5.0","Clustered","7.0","ENSMUSG00000028933"
"443","","",,,"","Cdc7","false","false","","Unclustered","6.0","Unclustered","6.5","ENSMUSG00000029283"
"442","","",,,"","Dfna5","false","false","","Unclustered","3.0","Unclustered","5.0","ENSMUSG00000029821"
"441","","",,,"","Fam189a1","false","false","","Unclustered","1.6666666666666667","Unclustered","1.6666666666666667","ENSMUSG00000030518"
"440","","",,,"","Srpx2","false","false","","Unclustered","2.0","Unclustered","3.0","ENSMUSG00000031253"
"439","","",,,"","Vsig1","false","false","","Unclustered","3.0","Unclustered","3.0","ENSMUSG00000031430"
"438","","",,,"","Anxa10","false","false","","Unclustered","4.0","Unclustered","6.0","ENSMUSG00000031635"
"437","","",,,"","Bace1","false","false","","Unclustered","3.0","Unclustered","3.0","ENSMUSG00000032086"
"436","","",,,"","Scg3","false","false","","Unclustered","2.7","Unclustered","3.6","ENSMUSG00000032181"
"435","","",,,"","Gnb5","false","false","","Unclustered","2.0","Unclustered","3.0","ENSMUSG00000032192"
"434","","",,,"","Gsta4","false","false","","Unclustered","0.0","Unclustered","0.0","ENSMUSG00000032348"
"433","","",,,"","Plscr4","false","false","","Unclustered","4.0","Unclustered","5.0","ENSMUSG00000032377"
"432","","",,,"","Cpne4","false","false","","Unclustered","4.0","Unclustered","6.0","ENSMUSG00000032564"
"431","","",,,"","Thsd7a","false","false","","Unclustered","3.7333333333333334","Unclustered","4.666666666666667","ENSMUSG00000032625"
"430","","",,,"","Cd59a","false","false","","Unclustered","3.0","Unclustered","3.0","ENSMUSG00000032679"
"429","","",,,"","Bmp8a","false","false","","Unclustered","5.0","Unclustered","6.0","ENSMUSG00000032726"
"428","","",,,"","Calhm2","false","false","","Unclustered","2.0","Unclustered","3.0","ENSMUSG00000033033"
"427","","",,,"Cluster 2","Tbc1d4","false","false","","Unclustered","5.785714285714286","Clustered","7.0","ENSMUSG00000033083"
"426","","",,,"","Slc41a2","false","false","","Unclustered","2.7","Unclustered","5.0","ENSMUSG00000034591"
"425","","",,,"","Fam151a","false","false","","Unclustered","2.7","Unclustered","5.0","ENSMUSG00000034871"
"424","","",,,"","Chst4","false","false","","Unclustered","4.0","Unclustered","4.0","ENSMUSG00000035930"
"423","","",,,"","Piwil4","false","false","","Unclustered","4.0","Unclustered","5.0","ENSMUSG00000036912"
"422","","",,,"","Syn1","false","false","","Unclustered","4.0","Unclustered","5.0","ENSMUSG00000037217"
"421","","",,,"","Spag1","false","false","","Unclustered","3.0","Unclustered","4.0","ENSMUSG00000037617"
"420","","",,,"","AW551984","false","false","","Unclustered","3.0","Unclustered","5.0","ENSMUSG00000038112"
"419","","",,,"","Edem2","false","false","","Unclustered","5.0","Unclustered","7.0","ENSMUSG00000038312"
"418","","",,,"","Nexn","false","false","","Unclustered","3.0","Unclustered","5.0","ENSMUSG00000039103"
"417","","",,,"","Cntnap2","false","false","","Unclustered","2.0","Unclustered","1.3333333333333333","ENSMUSG00000039419"
"416","","",,,"","Bace2","false","false","","Unclustered","5.0","Unclustered","4.523809523809524","ENSMUSG00000040605"
"415","","",,,"","Cd53","false","false","","Unclustered","4.0","Unclustered","4.0","ENSMUSG00000040747"
"414","","",,,"","Mill2","false","false","","Unclustered","3.0","Unclustered","5.0","ENSMUSG00000040987"
"413","ARCHS4 Coexpression,686;Enrichr Queries,101;GTEx Coexpression,677","KLB,MDC1,FAM89A,AQP7,MKI67,ETS1,SOGA1,IFIT3,IGF1R,IFIT2,RGS2,CCND1,DPYSL2,MYC,CHEK2,STMN1,MYB,CREB3L2,LONP1,GRB10,CEP250,PIM2,PDE8B,IER3,EPHA4,IGFBP4,IGFBP3,ARID5B,RNASE4,MAP1B,LGALS12,HOXB3,NUPR1,SDC4,NPR1,CDCA7,LPL,CACNA1A,NREP,ZFP36L2,CCNB1,RACGAP1,PRKAR2B,STC2,RAI2,PLXNA4,PRNP,EGR2,TGFB2,CAV2,INHBB,FBXO32,GADD45G,ISG20,CXCL10,CDK6,BAMBI,UBE2T,AMOTL2,PRRT4,ITM2C,MXD4,CDKN1C,TOP2A,BTG2,PDE3B,HMGB2,PTPRM,BRCA1,BRCA2,FOXM1,LMNB1,HHEX,C1QTNF1,DUSP10,SH3PXD2A,NETO1,MIS18BP1,TIMP2,TIMP3,SH3BGRL3,TK1,CD53,TMED8,CLUH,GPX3,GPBAR1,NAV1,NME4,ASPH,MDFIC,IRF1,IMPAD1,MCM3,SLC29A4,MCM6,GAS6,DTL,SLC43A2,UHRF1,PRIM1,RGS16,PTGER3,SEMA3G,FAM129A,LRP3,CXXC5,THBS1,AURKB,ABLIM1,SLC25A29,SERTAD4,SH3BP1,LRIG1,CYB5A,GSN,RRM2,SLC16A1,SYVN1,KLF4,SORL1,SORBS3,ALDH4A1,RAD51,GPAM,NFIB,VIM,TRIP13,SNTB1,CDKN3","479","488.0","","Zbed3","false","false","","Unclustered","5.0","Unclustered","5.0","ENSMUSG00000041995"
"412","","",,,"","Ypel3","false","false","","Unclustered","2.7","Unclustered","2.7","ENSMUSG00000042675"
"411","","",,,"","Krt87","false","false","","Unclustered","3.7333333333333334","Unclustered","4.666666666666667","ENSMUSG00000047641"
"410","","",,,"Cluster 2","Zc3hav1l","false","false","","Unclustered","6.0","Clustered","7.0","ENSMUSG00000047749"
"409","","",,,"","Rapgef4","false","false","","Unclustered","5.0","Unclustered","5.0","ENSMUSG00000049044"
"408","","",,,"","Prokr1","false","false","","Unclustered","4.761904761904762","Unclustered","6.0","ENSMUSG00000049409"
"407","","",,,"","Morn4","false","false","","Unclustered","1.6666666666666667","Unclustered","3.0","ENSMUSG00000049670"
"406","","",,,"","Fam131a","false","false","","Unclustered","2.0","Unclustered","3.0","ENSMUSG00000050821"
"405","","",,,"","Slc29a4","false","false","","Unclustered","6.0","Unclustered","6.25","ENSMUSG00000050822"
"404","","",,,"","Tceal8","false","false","","Unclustered","3.7333333333333334","Unclustered","5.0","ENSMUSG00000051579"
"403","","",,,"","Cyp2j5","false","false","","Unclustered","2.7","Unclustered","4.0","ENSMUSG00000052520"
"402","","",,,"","1700016K19Rik","false","false","","Unclustered","5.0","Unclustered","6.0","ENSMUSG00000053783"
"401","","",,,"","Ceacam10","false","false","","Unclustered","5.0","Unclustered","6.0","ENSMUSG00000054169"
"400","","",,,"","Cadps","false","false","","Unclustered","4.0","Unclustered","5.0","ENSMUSG00000054423"
"399","","",,,"","Triqk","false","false","","Unclustered","3.0","Unclustered","5.0","ENSMUSG00000055963"
"398","","",,,"","Apol9a","false","false","","Unclustered","3.0","Unclustered","3.0","ENSMUSG00000057346"
"397","","",,,"","Akap17b","false","false","","Unclustered","2.7","Unclustered","3.6","ENSMUSG00000059708"
"396","","",,,"","Tac1","false","false","","Unclustered","5.0","Unclustered","6.0","ENSMUSG00000061762"
"395","","",,,"","Tubb4a","false","false","","Unclustered","4.0","Unclustered","5.0","ENSMUSG00000062591"
"394","","",,,"","Chil1","false","false","","Unclustered","5.0","Unclustered","6.0","ENSMUSG00000064246"
"393","","",,,"","Insl5","false","false","","Unclustered","2.0","Unclustered","3.0","ENSMUSG00000066090"
"392","","",,,"","Cyp2c66","false","false","","Unclustered","4.0","Unclustered","5.0","ENSMUSG00000067229"
"391","ARCHS4 Coexpression,871;Enrichr Queries,714;GTEx Coexpression,1075","CDKN1C,FOXA1,RET,TRIM72,GFI1,HSPB8,FHL1,RORA,DOC2B,JPH1,ENO3,AMOT,C1QTNF1,XPO4,MECOM,MCIDAS,DPF3,TMEM38A,SEMA6C,FOXD2,APOBEC2,UNC5A,ADPRHL1,SHISA4,PAX6,CBFA2T3,MN1,OBSCN,NR5A2,LMX1A,RASA4,LGALS12,ADSSL1,HOXB3,LMX1B,SMTNL2,SCN4B,RTN2,CAMK2B,PFKFB1,SMPX,GLIS3,GMPR,CACNA1A,SRL,CLCN1,RHOBTB1,AURKB,ASB16,DLL4,IGSF21,ATOH8,MSX1,NPTX1,RHBDL3,NPTX2,HES5,ZBTB7C,NGFR,MYH7B,EGR2,KCNJ11,BDNF,SLC35E4,BMP8A,ESRRG,PPP2R3A,POU4F1,GADD45G,CXCL10,FA2H,GJB2,NR4A3,PKIA,LHX1,LYPD6B,FEV,PPP1R1B,ID4,FOSB,INSM1,COQ8A,FGFR3","1051","886.7","","Gbx1","false","false","","Unclustered","3.0","Unclustered","5.0","ENSMUSG00000067724"
"390","","",,,"","Efcab1","false","false","","Unclustered","4.0","Unclustered","5.0","ENSMUSG00000068617"
"389","","",,,"Cluster 2","Trim6","false","false","","Unclustered","6.0","Clustered","7.0","ENSMUSG00000072244"
"388","","",,,"Cluster 2","Selenos","false","false","","Unclustered","3.7333333333333334","Clustered","7.0","ENSMUSG00000075701"
"387","","",,,"","Hsbp1l1","false","false","","Unclustered","4.0","Unclustered","5.0","ENSMUSG00000078963"
"386","","",,,"","Mptx2","false","false","","Unclustered","3.0","Unclustered","5.0","ENSMUSG00000079180"
"385","","",,,"","Gm11549","false","false","","Unclustered","2.0","Unclustered","3.0","ENSMUSG00000085007"
"384","","",,,"","Olfr859","false","false","","Unclustered","4.0","Unclustered","6.0","ENSMUSG00000095448"
"383","","",,,"","2610528A11Rik","false","false","","Unclustered","3.0","Unclustered","5.0","ENSMUSG00000096001"
"382","","",,,"","RP23-383B20.1","false","false","","Unclustered","2.0","Unclustered","3.0","ENSMUSG00000110573"
"381","","",,,"","Nrep","false","false","","Unclustered","2.0","Unclustered","2.0","ENSMUSG00000042834"
"380","","",,,"","Scml2","false","false","","Unclustered","2.0","Unclustered","3.0","ENSMUSG00000000037"
"379","","",,,"","Fbxo9","false","false","","Unclustered","1.6666666666666667","Unclustered","2.5","ENSMUSG00000001366"
"378","","",,,"","Dbf4","false","false","","Unclustered","0.0","Unclustered","0.0","ENSMUSG00000002297"
"377","","",,,"","Syce2","false","false","","Unclustered","5.0","Unclustered","5.0","ENSMUSG00000003824"
"376","","",,,"","Psg17","false","false","","Unclustered","2.0","Unclustered","2.0","ENSMUSG00000004540"
"375","","",,,"","Pyy","false","false","","Unclustered","0.0","Unclustered","0.0","ENSMUSG00000017311"
"374","","",,,"","Alox15","false","false","","Unclustered","3.0","Unclustered","4.0","ENSMUSG00000018924"
"373","","",,,"","Mgat4c","false","false","","Unclustered","2.0","Unclustered","3.0","ENSMUSG00000019888"
"372","","",,,"","Arg1","false","false","","Unclustered","2.0","Unclustered","2.0","ENSMUSG00000019987"
"371","","",,,"","Nuak1","false","false","","Unclustered","1.6666666666666667","Unclustered","1.6666666666666667","ENSMUSG00000020032"
"370","","",,,"","Shmt1","false","false","","Unclustered","2.0","Unclustered","3.0","ENSMUSG00000020534"
"369","","",,,"","Klhl29","false","false","","Unclustered","0.0","Unclustered","0.0","ENSMUSG00000020627"
"368","","",,,"","Bdkrb2","false","false","","Unclustered","2.0","Unclustered","3.0","ENSMUSG00000021070"
"367","","",,,"","Slc22a17","false","false","","Unclustered","0.0","Unclustered","0.0","ENSMUSG00000022199"
"366","","",,,"","Cd200","false","false","","Unclustered","0.0","Unclustered","0.0","ENSMUSG00000022661"
"365","","",,,"","Grm2","false","false","","Unclustered","3.0","Unclustered","3.0","ENSMUSG00000023192"
"364","","",,,"","Mep1b","false","false","","Unclustered","0.0","Unclustered","0.0","ENSMUSG00000024313"
"363","","",,,"","Col11a2","false","false","","Unclustered","2.0","Unclustered","2.0","ENSMUSG00000024330"
"362","","",,,"","Incenp","false","false","","Unclustered","2.0","Unclustered","2.0","ENSMUSG00000024660"
"361","","",,,"","Lipk","false","false","","Unclustered","3.0","Unclustered","3.0","ENSMUSG00000024771"
"360","","",,,"","Tyro3","false","false","","Unclustered","2.0","Unclustered","3.0","ENSMUSG00000027298"
"359","","",,,"","Knstrn","false","false","","Unclustered","2.0","Unclustered","3.0","ENSMUSG00000027331"
"358","","",,,"","Aurka","false","false","","Unclustered","0.5","Unclustered","0.5","ENSMUSG00000027496"
"357","","",,,"","Hemgn","false","false","","Unclustered","2.0","Unclustered","3.0","ENSMUSG00000028332"
"356","","",,,"","Rfc5","false","false","","Unclustered","0.0","Unclustered","0.0","ENSMUSG00000029363"
"355","","",,,"","Ddias","false","false","","Unclustered","2.0","Unclustered","3.0","ENSMUSG00000030641"
"354","","",,,"","Tgfb1i1","false","false","","Unclustered","5.0","Unclustered","4.523809523809524","ENSMUSG00000030782"
"353","","",,,"","Smarca1","false","false","","Unclustered","3.0","Unclustered","4.0","ENSMUSG00000031099"
"352","","",,,"","Sytl4","false","false","","Unclustered","2.0","Unclustered","3.0","ENSMUSG00000031255"
"351","","",,,"","Bmx","false","false","","Unclustered","1.6666666666666667","Unclustered","2.5","ENSMUSG00000031377"
"350","","",,,"","Plpp5","false","false","","Unclustered","2.0","Unclustered","2.0","ENSMUSG00000031570"
"349","","",,,"","Dixdc1","false","false","","Unclustered","0.0","Unclustered","0.0","ENSMUSG00000032064"
"348","","",,,"","P2ry2","false","false","","Unclustered","3.0","Unclustered","3.0","ENSMUSG00000032860"
"347","","",,,"","Ly6g6f","false","false","","Unclustered","0.0","Unclustered","0.0","ENSMUSG00000034923"
"346","","",,,"","Pcyt1b","false","false","","Unclustered","3.0","Unclustered","4.0","ENSMUSG00000035246"
"345","","",,,"","Hmha1","false","false","","Unclustered","3.0","Unclustered","3.0","ENSMUSG00000035697"
"344","","",,,"","Mbnl3","false","false","","Unclustered","0.0","Unclustered","0.0","ENSMUSG00000036109"
"343","","",,,"","Fstl4","false","false","","Unclustered","4.0","Unclustered","4.0","ENSMUSG00000036264"
"342","","",,,"","Lipt1","false","false","","Unclustered","0.0","Unclustered","0.0","ENSMUSG00000037216"
"341","","",,,"","Suv39h1","false","false","","Unclustered","3.0","Unclustered","4.0","ENSMUSG00000039231"
"340","","",,,"","Cdk6","false","false","","Unclustered","2.0","Unclustered","2.0","ENSMUSG00000040274"
"339","","",,,"","S100a13","false","false","","Unclustered","0.6666666666666666","Unclustered","0.6666666666666666","ENSMUSG00000042312"
"338","","",,,"","Rai2","false","false","","Unclustered","1.6666666666666667","Unclustered","1.6666666666666667","ENSMUSG00000043518"
"337","","",,,"","Rassf9","false","false","","Unclustered","2.7","Unclustered","3.6","ENSMUSG00000044921"
"336","","",,,"","Pkd1l1","false","false","","Unclustered","5.0","Unclustered","5.0","ENSMUSG00000046634"
"335","","",,,"","Taf9b","false","false","","Unclustered","3.0","Unclustered","3.0","ENSMUSG00000047242"
"334","ARCHS4 Coexpression,1048;Enrichr Queries,655;GTEx Coexpression,400","FOXA1,MDC1,RORA,ETS1,SOGA1,SYDE2,LGALS3,CCND1,CDH2,DPYSL2,MYC,CHEK2,DPYSL3,PIEZO1,HOXA4,TGM2,IER3,EPHA4,EPHA7,POSTN,IGFBP4,IGFBP3,ARID5B,FRMD4A,HSPG2,EML1,ADAM19,SELENOM,ADAM12,HOXB4,KCNQ4,HOXB2,HOXB8,MYL9,ARHGEF25,CACNA1A,CACNA1C,CACNA1H,BAG2,STC2,FAM83D,EGR2,TGFB2,OSBPL5,RBPMS,FZD7,HMGA2,KLHL23,SSC5D,BMP4,BMP3,CXCL10,CDK6,FERMT2,CDKN1C,GPSM1,COL18A1,NRP2,TGFB1I1,TNFAIP2,NRARP,PCSK4,LFNG,C1QTNF1,MECOM,TIMP2,TIMP3,EMILIN1,SCARF2,CC2D2A,POLE,TPSG1,GFRA1,NME4,PAX6,KCNMA1,PLEKHO1,GAS6,PDZRN3,PKN3,CCDC69,LAMA4,PRUNE2,FAM129A,THBS1,THSD4,AURKB,SLIT1,LRIG1,MSX1,RUNX1T1,GALNT5,GSN,KLF4,SORBS3,NFIB,FOSB,VIM","800","701.0","","Hoxb3","false","false","","Unclustered","0.6666666666666666","Unclustered","0.6666666666666666","ENSMUSG00000048763"
"333","","",,,"","Armcx3","false","false","","Unclustered","3.0","Unclustered","5.0","ENSMUSG00000049047"
"332","","",,,"","Nlrc3","false","false","","Unclustered","3.0","Unclustered","3.0","ENSMUSG00000049871"
"331","","",,,"","Eif5a2","false","false","","Unclustered","4.0","Unclustered","3.466666666666667","ENSMUSG00000050192"
"330","","",,,"","38961","false","false","","Unclustered","3.0","Unclustered","3.0","ENSMUSG00000050379"
"329","","",,,"","Armcx6","false","false","","Unclustered","0.0","Unclustered","0.0","ENSMUSG00000050394"
"328","","",,,"","Adgrf5","false","false","","Unclustered","3.7333333333333334","Unclustered","3.7333333333333334","ENSMUSG00000056492"
"327","","",,,"","Serpina9","false","false","","Unclustered","3.0","Unclustered","4.0","ENSMUSG00000058260"
"326","","",,,"","Akr1b10","false","false","","Unclustered","2.7","Unclustered","3.6","ENSMUSG00000061758"
"325","","",,,"","Nsl1","false","false","","Unclustered","3.0","Unclustered","5.0","ENSMUSG00000062510"
"324","","",,,"","Defa24","false","false","","Unclustered","0.0","Unclustered","0.0","ENSMUSG00000064213"
"323","","",,,"","Serpina1a","false","false","","Unclustered","1.6666666666666667","Unclustered","1.6666666666666667","ENSMUSG00000066366"
"322","","",,,"","Apol9b","false","false","","Unclustered","2.0","Unclustered","2.0","ENSMUSG00000068246"
"321","","",,,"","Mboat4","false","false","","Unclustered","2.0","Unclustered","2.0","ENSMUSG00000071113"
"320","","",,,"","Gspt2","false","false","","Unclustered","2.0","Unclustered","3.0","ENSMUSG00000071723"
"319","","",,,"","Trim40","false","false","","Unclustered","2.0","Unclustered","2.0","ENSMUSG00000073399"
"318","","",,,"","Gm12888","false","false","","Unclustered","2.0","Unclustered","2.0","ENSMUSG00000073764"
"317","","",,,"","Aldh3b2","false","false","","Unclustered","0.0","Unclustered","0.0","ENSMUSG00000075296"
"316","","",,,"","Rassf10","false","false","","Unclustered","5.0","Unclustered","5.0","ENSMUSG00000098132"
"315","","",,,"","Ecm1","false","false","","Unclustered","0.6666666666666666","Unclustered","0.6666666666666666","ENSMUSG00000028108"
"314","ARCHS4 Coexpression,413;Enrichr Queries,330;ReMap ChIP-seq,48;GTEx Coexpression,653","IFITM3,MDC1,ACSM3,AQP7,STMN3,MKI67,CLDN1,IFIT3,IFIT2,LGALS3,DPYSL2,MYC,LIPG,CREB3L2,MYB,TNFSF10,LONP1,RTTN,SKP2,GLUL,SLC12A8,CHGB,IER3,TMEM88B,RSAD2,IL1R1,DAPK2,SERPINF2,RNASE4,MAPK8IP2,RBP4,FNDC1,GSAP,RIN3,KCTD12,SDC4,MGST2,INPP5D,PCK1,ST3GAL1,FZD3,EGR2,SLC33A1,NBEAL2,ABCA7,NR0B2,GADD45G,XKR7,TPX2,ID4,SPATS2L,RGL3,CALR,C2CD2L,ITM2C,TOP2A,NRP1,BTG2,ATF7IP2,TDRP,BRCA1,SERPINA9,KIF11,RCSD1,CX3CL1,HERPUD1,LIMD2,SH3PXD2A,MIS18BP1,TCP11L2,TIMP3,TK1,LMCD1,CD53,MANEAL,F2,CBFA2T3,PARP8,RNF144B,HCK,MMP15,B3GNT6,KIT,TFF3,TFF2,GPRC5C,PLCB2,PCNA,SLC43A3,SLC43A1,FAM129A,AFP,PTGS1,FAM117A,SLC17A9,RASSF10,ALOX5,LY6G6F,EGLN1,CENPU,GK,GCH1,BMP8A,LAPTM5,LHFPL2,SORBS3,AGT,GFI1B,FKBP1B,SARM1,LGR5,YPEL3,MEGF9,RAB3B,CD83,NRROS,IRS1,NCF2,ETS1,CELSR3,RGS2,CAPN9,ARHGAP40,CCND1,BASP1,PDE8B,TGM2,PDIA3,G6PC,KCNH6,CD93,IGFBP4,ZBTB38,IGFBP3,DIO1,IGFBP2,SDCBP2,TLE6,MPEG1,RAB37,MFNG,SLCO2A1,S100A6,NUPR1,EMID1,CSF1R,NOTCH1,HPCA,GLIS3,AK4,CPLX2,RAP1GAP,ZFP36L2,TMEM245,BCL2L11,GRK2,PRNP,SDF2L1,AMBP,ZBTB10,HMGA2,DNAJC12,SYT7,ARHGAP24,PYY,CXCL10,RGCC,FES,BAMBI,SLC26A4,PLEKHM3,PNLIPRP1,SNAP25,TNFAIP2,ATP2A3,HSPB1,ZC3H6,PIK3CG,SPN,TOPBP1,GAL3ST2,BCAS1,HIST1H1C,HS3ST3B1,EGFL7,ITGA4,HAUS4,PLAUR,AXIN2,CKAP4,SSTR5,FGR,RCN1,ADGRF1,TBC1D4,IRF1,ALDH1A1,PECAM1,CCDC190,ANG,DOCK2,DCTPP1,RGS14,CCDC68,NTN4,SLC5A10,ADD3,CXXC5,THBS1,AURKB,AURKA,SLC25A29,GNG4,SPOCK2,LRIG1,HES1,TRIM40,RRM2,ARID3A,KLF4,SORL1,DHODH,FMNL1,SST,ALOX5AP,TRIM35,SLC25A30,PABPC1L,VIM,SNTB1","289","361.0","","Hhex","false","false","","Unclustered","0.6666666666666666","Unclustered","0.6666666666666666","ENSMUSG00000024986"
"313","","",,,"","Ndrg4","false","false","","Unclustered","2.0","Unclustered","2.0","ENSMUSG00000036564"
"312","","",,,"","Cyp11a1","false","false","","Unclustered","0.0","Unclustered","0.0","ENSMUSG00000032323"
"311","","",,,"","Cep128","false","false","","Unclustered","2.7","Unclustered","2.7","ENSMUSG00000061533"
"310","","",,,"","Fer1l4","false","false","","Unclustered","1.6666666666666667","Unclustered","1.6666666666666667","ENSMUSG00000013338"
"309","","",,,"","Syne4","false","false","","Unclustered","2.0","Unclustered","3.0","ENSMUSG00000019737"
"308","","",,,"","Mllt3","false","false","","Unclustered","3.0","Unclustered","3.0","ENSMUSG00000028496"
"307","","",,,"","Rell2","false","false","","Unclustered","2.0","Unclustered","2.0","ENSMUSG00000044024"
"306","","",,,"","Fgf15","false","false","","Unclustered","2.0","Unclustered","2.0","ENSMUSG00000031073"
"305","","",,,"","Tgfb2","false","false","","Unclustered","2.0","Unclustered","2.0","ENSMUSG00000039239"
"303","ARCHS4 Coexpression,91;Enrichr Queries,36;ReMap ChIP-seq,45;GTEx Coexpression,143","MDC1,ANKLE1,NOC2L,SOGA1,ENO3,SAMD14,RPS6KA6,CREB3L4,MYC,CREB3L1,DPYSL2,CHEK2,LIPH,MYB,DPYSL3,PIEZO1,IER3,CHGB,EPHA4,TRIQK,RBFOX3,DNAAF3,UNC5A,CACNA2D1,SYTL1,KCNK16,TM4SF4,HSPG2,ISL1,CLDN6,TIAM1,RFX6,TFR2,CLDN9,MAP1B,LGALS12,HOXB4,HOXB3,HOXB2,HOXB8,STX1A,BEX2,SHMT2,GIPR,STXBP1,ARX,ABCB9,CRACR2B,PCBP3,KCNN4,SCN3B,SCN3A,NKX2-2,EGR2,PLK5,CARMIL3,SPHKAP,CADM1,ST8SIA3,SLC16A12,ABCA7,ST18,GADD45G,FOSL1,PKIB,XKR7,FXYD2,ID4,FXYD6,SERPINI1,PAM,C2CD2L,CDKN1C,NRP1,PCSK1,PTPRR,BTG2,TMEM151B,KCNC1,PHF1,TGFB1I1,PTPRN,DIRAS2,ICA1,MMP24,KCNT1,PCLO,FAM102A,UCN3,TRIM3,DNER,SH3BGRL3,NEFM,PLEKHN1,QSOX2,FFAR1,APC2,PSD,ACTL6B,EDN3,IZUMO1,ROM1,PAX6,NME4,SYP,PROX1,CBFA2T3,RENBP,VAV1,CNKSR2,B3GNT9,KIFC1,ANGPTL6,KIT,KCNMA1,PLCB2,VAMP2,DBN1,CD63,NBAS,PLPPR2,COL11A2,SEZ6,CRYBA2,ADCY1,PHYHIP,SLC7A2,CARNS1,PAK3,GABRD,LY6G6F,RUNX1T1,GCH1,KCNB1,KCNB2,LAPTM5,KLHL3,GCG,TUBB4A,POU4F1,STXBP5L,TTC8,NFIB,KRT15,QPCT,RIMBP2,FOSB,RAB3B,RAB3C,TUSC3,RAB3D,CHRM4,CELSR3,RGS4,SCGN,SLC25A48,CDH2,KIF5C,TNFRSF8,PIM2,SH2D6,KCNH2,TLE2,CASR,APLP1,MYT1,DISP2,ACAP3,OLFM1,RAB36,ZFP41,RAB37,SCG5,ANKS6,SCG3,SQSTM1,SCG2,RTN2,GPR119,CACNA1B,CACNA1A,NREP,CPLX2,PKMYT1,FUT1,IGSF21,NEUROD2,SCIN,NPTX1,NPTX2,TAC1,ASIC1,PRNP,TGFB2,SDF2L1,DENND4B,SYT1,BDNF,HMGA1,DNAJC12,ISG15,SSC5D,ESRRG,INHBC,SYT7,GNAO1,CXCL10,EFNA3,PLCXD3,FGF14,DLG4,FES,LHX1,FEV,SP6,CPE,MAP3K12,LRP11,SNAP25,CNTNAP2,RASGRF1,TNFAIP2,YBX2,NRARP,SYNE1,UNC80,SPRED3,PIDD1,ADGRE5,MCF2L,EMILIN1,TRIM67,EGFL7,ITGA4,ABCC8,GPX3,SH2D3C,PPP2R5B,ETV1,KCNAB3,SYNGR4,SSTR3,FGR,VGF,ALDH1A1,GNB1L,NEMP1,ST6GALNAC4,CAMK2B,DDC,PALM3,CRMP1,CXXC5,THBS1,PPM1E,CXXC4,AURKB,NCALD,DLL3,ABLIM1,GNG2,RASD1,GNG4,POLD1,E2F1,SPOCK1,HES1,HES5,LRRC8E,SEC11C,CHGA,LINGO3,PCDHGC4,PCDH8,CADPS,ARID3A,CCK,SYT14,FBXL16,SYT13,MBOAT4,KLF4,TTC39A,NFASC,SST,FAM131A,VIM,INSM1,CBLN3","27","78.75","","Neurod1","false","false","","Unclustered","2.130624092888244","Unclustered","2.090845562543676","ENSMUSG00000034701"
"302","","",,,"","Tk1","false","false","","Unclustered","0.0","Unclustered","0.0","ENSMUSG00000025574"
"301","","",,,"","Mcm8","false","false","","Unclustered","0.0","Unclustered","0.0","ENSMUSG00000027353"
"300","","",,,"","Mphosph9","false","false","","Unclustered","0.0","Unclustered","0.0","ENSMUSG00000038126"
"299","","",,,"","Kcnb1","false","false","","Unclustered","0.6666666666666666","Unclustered","0.6666666666666666","ENSMUSG00000050556"
"298","ARCHS4 Coexpression,1288;Enrichr Queries,816;ReMap ChIP-seq,90;GTEx Coexpression,855","IFITM3,GALNT12,EHF,NRROS,FAM89A,SLC35B1,GMNN,BUB1B,TMEM140,ETS1,CNDP2,SYDE2,LGALS3,RGS2,IL18RAP,CCND1,CREB3L1,DPYSL2,MYC,CCRL2,MYB,TNFSF10,CAPN2,PIEZO1,PIM2,CCDC92,SH2D6,TGM2,IER3,KCNH2,TOR3A,MBNL1,IL1R1,DAPK1,DAPK2,SERPINF2,MITF,RNASE1,ADAM19,SELENOM,SELENOS,CLDN9,SCNN1A,LGALS12,HOXB4,S100A6,HOXB3,HOXB2,NUPR1,KDELR3,HOXB8,SQSTM1,RWDD2A,NOTCH1,SDC4,FAM114A1,EIF5A2,FBXO48,GMPR,SLC5A3,RAP1GAP,ALDH3B2,PRKAR2B,CYP11A1,S100A13,MAP6,SARAF,ST8SIA6,PCK1,MAP9,ST3GAL2,B4GALNT4,PRNP,SDF2L1,CBX5,HSPA5,NEBL,ARHGEF39,HMGA1,NBEAL2,PYCR2,CDC7,ISG15,GADD45G,MANF,REEP1,FOSL1,ISG20,CXCL10,DAP,FES,SDC1,MAGED2,FBXL2,CALR,PLEKHM3,C2CD2L,ITM2C,DYRK3,BTG2,PHF1,ATF7IP2,TNFAIP2,HSPB1,ZC3H6,SOBP,RCSD1,VSIR,PIK3CG,HERPUD1,SPN,DUSP10,TUBA1A,PBK,TIMP2,TMED3,ANXA6,TIMP3,SH3BGRL3,PLEKHN1,FFAR1,IFT57,CFAP45,HIST1H1C,CD53,DENND2C,LEFTY1,GPX3,LIX1L,PLAUR,NME4,NME5,IQCD,RHOC,CBFA2T3,CKAP4,CREB3,TUBB2A,ASPH,KIFC1,IRF1,IRF7,PLEKHO1,MAPRE3,MTFR2,SPACA6,DCTPP1,HEMGN,MAGEH1,CD63,NBAS,PKN3,INPP1,SLC43A3,HDC,PRUNE2,COL11A2,RSPH9,SRL,CXXC5,THBS1,AURKB,POLD1,LRIG1,DNAJB9,HES1,PDE6A,HES5,LY6G6F,GALNT5,GSN,SUSD1,LAPTM5,KLF4,CFAP36,VIM,CENPP,SSBP2,RAMP1","888","762.3","","Creb3","false","false","","Unclustered","0.0","Unclustered","0.0","ENSMUSG00000028466"
"297","","",,,"","Herpud1","false","false","","Unclustered","0.0","Unclustered","0.0","ENSMUSG00000031770"
"296","","",,,"","Ffar3","false","false","","Unclustered","0.0","Unclustered","0.0","ENSMUSG00000019429"
"295","","",,,"","Mapk8ip1","false","false","","Unclustered","3.0","Unclustered","3.0","ENSMUSG00000027223"
"294","","",,,"","Ccdc92","false","false","","Unclustered","2.0","Unclustered","2.0","ENSMUSG00000037979"
"293","","",,,"","Angpt2","false","false","","Unclustered","0.0","Unclustered","0.0","ENSMUSG00000031465"
"292","","",,,"","Kif15","false","false","","Unclustered","0.0","Unclustered","0.0","ENSMUSG00000036768"
"291","","",,,"","Sgtb","false","false","","Unclustered","0.0","Unclustered","0.0","ENSMUSG00000042743"
"290","","",,,"","Palb2","false","false","","Unclustered","0.0","Unclustered","0.0","ENSMUSG00000044702"
"289","","",,,"","Gm1123","false","false","","Unclustered","0.6666666666666666","Unclustered","0.6666666666666666","ENSMUSG00000044860"
"288","","",,,"","BC048546","false","false","","Unclustered","0.0","Unclustered","0.0","ENSMUSG00000047228"
"287","","",,,"","Rinl","false","false","","Unclustered","0.0","Unclustered","0.0","ENSMUSG00000051735"
"286","","",,,"","Sytl5","false","false","","Unclustered","0.0","Unclustered","0.0","ENSMUSG00000054453"
"285","","",,,"","Rom1","false","false","","Unclustered","0.0","Unclustered","0.0","ENSMUSG00000071648"
"284","","",,,"","Ffar1","false","false","","Unclustered","0.0","Unclustered","0.0","ENSMUSG00000044453"
"283","","",,,"","Sdc1","false","false","","Unclustered","0.6666666666666666","Unclustered","0.6666666666666666","ENSMUSG00000020592"
"282","","",,,"","Ska3","false","false","","Unclustered","0.0","Unclustered","0.0","ENSMUSG00000021965"
"281","","",,,"","40422","false","false","","Unclustered","0.0","Unclustered","0.0","ENSMUSG00000019917"
"280","","",,,"","Angptl6","false","false","","Unclustered","0.6666666666666666","Unclustered","0.6666666666666666","ENSMUSG00000038742"
"279","","",,,"","Aspa","false","false","","Unclustered","0.0","Unclustered","0.0","ENSMUSG00000020774"
"278","","",,,"","Syt13","false","false","","Unclustered","1.6666666666666667","Unclustered","1.6666666666666667","ENSMUSG00000027220"
"277","","",,,"","9330182L06Rik","false","false","","Unclustered","0.0","Unclustered","0.0","ENSMUSG00000056004"
"276","","",,,"","Defa30","false","false","","Unclustered","0.0","Unclustered","0.0","ENSMUSG00000074444"
"275","","",,,"","Muc3a","false","false","","Unclustered","0.0","Unclustered","0.0","ENSMUSG00000094840"
"274","ARCHS4 Coexpression,1143;Enrichr Queries,657;ReMap ChIP-seq,296;GTEx Coexpression,608","FOXA1,RET,CNTNAP2,EHF,CCDC120,KCNC1,ZWILCH,RORA,CWH43,TFCP2L1,SDR16C5,PREX1,MECOM,CCND1,NIPAL2,LIPH,CHEK2,LIPG,MYB,TMED3,EFHD1,PLEKHN1,TNS4,APOBEC1,RNF43,EPHA4,KCND3,IGFBP3,IGFBP2,URAD,SYTL1,IL17RE,SDCBP2,ISL1,OLFM1,CLDN4,RIPPLY3,SCNN1A,KIT,LGALS12,RHOV,GPRC5C,GRID2IP,COL17A1,SDC4,LAMA4,HPCA,CACNA1A,ATP2C2,THBS1,AURKB,ALDH3B2,KLC3,NUAK1,RASD1,PRSS50,RDH12,RASSF10,CAMK2N1,STC2,ATOH8,RNF39,LRIG1,AGR2,KLRG2,CEP72,SPTSSB,TSPAN1,ZBTB7C,MPZL2,MYH7B,PRNP,CADM1,ANKRD22,OSBPL2,IRX4,RAB27B,KLF4,CXCL10,FA2H,MLPH,FXYD3,GJB3,NFIB,BAMBI,FAM151A,LYPD6B,MYO5C,PPP1R1B,SDC1,INSM1,FGFR3,FOXA3,PLEKHM3,ITM2C,BRDT","762","676.0","","Ovol2","false","false","","Unclustered","3.4444444444444446","Unclustered","3.4444444444444446","ENSMUSG00000037279"
"273","","",,,"","Cdca3","false","false","","Unclustered","0.0","Unclustered","0.0","ENSMUSG00000023505"
"272","","",,,"","Orc1","false","false","","Unclustered","0.6666666666666666","Unclustered","0.6666666666666666","ENSMUSG00000028587"
"271","","",,,"","Impdh2","false","false","","Unclustered","0.0","Unclustered","0.0","ENSMUSG00000062867"
"270","ARCHS4 Coexpression,1199;Enrichr Queries,320;GTEx Coexpression,452","IFITM3,ETS1,SYDE2,RGS4,RGS2,CCND1,CDH2,BASP1,DPYSL2,MYC,CREB3L1,DPYSL3,PIEZO1,HOXA4,TGM2,IER3,EPHA4,EPHA7,POSTN,IGFBP4,IGFBP3,IGFBP2,HSPG2,EML1,ADAM19,SELENOM,MFNG,ADAM12,HOXB4,S100A6,KCNQ4,HOXB3,MXRA7,HOXB8,MYL9,BEX2,FAM114A1,ARHGEF25,SLC1A3,CACNA1C,CACNA1H,ZFP36L2,NUAK1,BAG2,STC2,IGFBP7,FAM83D,PRNP,EGR2,TGFB2,OSBPL5,RBPMS,CADM1,FZD7,SSC5D,ISG15,BMP4,CXCL10,RGCC,CDK6,BAMBI,FERMT2,ITM2C,NRP1,COL18A1,NRP2,BTG2,TGFB1I1,TNFAIP2,HSPB1,RND3,LIMD2,SPN,HHEX,MECOM,ANXA6,TIMP3,EMILIN1,SH3BGRL3,SCARF2,CC2D2A,EGFL7,PLAUR,NME4,MN1,KCNMA1,PLEKHO1,PDZRN3,HCST,CCDC69,LAMA4,PRUNE2,FAM129A,THBS1,AURKB,FAM117A,LRIG1,MSX1,SLIT2,TPBG,KLF4,DLK1,ACKR3,FOSB,VIM","740","657.0","","Hoxb2","false","false","","Unclustered","0.0","Unclustered","0.0","ENSMUSG00000075588"
"269","","",,,"","Synpr","false","false","","Unclustered","0.0","Unclustered","0.0","ENSMUSG00000056296"
"268","","",,,"","Hist2h3c2","false","false","","Unclustered","0.0","Unclustered","0.0","ENSMUSG00000081058"
"267","","",,,"","Gen1","false","false","","Unclustered","0.0","Unclustered","0.0","ENSMUSG00000051235"
"266","ARCHS4 Coexpression,195;Enrichr Queries,140;GTEx Coexpression,247","FOXA1,RAB3B,GALNT12,SH2D7,OLFML2B,CPNE4,GFI1,CELSR3,SPIB,ARHGAP44,RGS4,RGS2,DPYSL2,CHGB,SPINK4,EPM2A,IGFBP2,VWA5B2,MUC3A,ISL1,OVOL2,CLDN4,LMX1A,GPRIN1,LGALS12,ZG16,LMX1B,GRID2IP,BRSK2,SLC1A1,CDCA7,CACNA1B,CACNA1A,TNFRSF11A,C2CD4C,CPLX2,NEUROD1,NEUROD2,IGSF21,TRPM2,PGBD5,TSPAN6,GALR1,CLCA1,CEP72,NPTX1,SCN3B,NPTX2,TAC1,TRPM5,RHBDL3,TSPAN1,WNT3,B4GALNT4,NKX2-2,NGFR,CARMIL2,EGR2,BDNF,REG4,PCDH20,ESRRG,NBEAL2,B3GALT5,ST18,GADD45G,BMP4,PYY,CXCL10,SDK1,LHX1,FEV,ID4,RGL3,RNF183,CNIH2,SLC26A4,CDKN1C,RET,SNAP25,PCSK1,BTG2,GRIK3,KRT20,C1QTNF1,NETO1,MECOM,NEFM,QSOX2,GAL3ST2,STUM,APOBEC1,PSD,SLC36A1,URAD,PAX4,GPBAR1,GFRA1,PAX6,PROX1,SSTR1,CBFA2T3,SYN1,GIP,NR5A2,VGF,B3GNT5,MMP17,KIT,KCNMA1,TFF3,CDHR5,CAMK2B,RGS17,DDC,PLPPR2,RGS16,SEZ6,CRYBA2,CRMP1,MLLT3,ASCL2,CXXC4,TMEM163,AURKB,DLL3,MUC2,RASD1,GCNT3,NRIP3,MSX1,WASF1,ATOH1,HES5,RUNX1T1,SEC11C,CHGA,KCNB2,PLCL1,PCDH8,IRX4,CADPS,FAM189A1,SYT13,KLF4,POU4F1,GUCA2A,DLK1,SMOC2,GSTA4,SST,FKBP1B,GHRL,RGS12,INSM1,LGR5,FRYL","93","194.0","","Neurog3","false","false","","Unclustered","3.0","Unclustered","3.0","ENSMUSG00000044312"
"265","ARCHS4 Coexpression,1;Enrichr Queries,1;GTEx Coexpression,882","MDC1,LRR1,CCNF,MKI67,ENO3,SMC4,SMC2,CDC20,MYC,CHEK2,MYB,STMN1,CHEK1,FBXO5,SKP2,GTSE1,TIPIN,KNL1,ESCO2,KNSTRN,WDR76,NEIL3,DNA2,KIF20B,PRR11,ASF1B,PIF1,CDCA3,CDCA7,NCAPG,SLCO5A1,SKA3,IQGAP3,NCAPH,SKA1,DSN1,RACGAP1,FIGNL1,PLK4,BARD1,DDIAS,XRCC2,PLK1,CDC7,CDC6,FAM111A,POLA1,TPX2,ANLN,PKIA,TOP2A,NCAPG2,KIF14,BRCA1,KIF11,BRCA2,JPH1,KIF15,CHAF1B,TUBA1B,CHAF1A,XPO4,MIS18BP1,NUF2,PBK,TK1,CEP55,NDC1,TCF19,DENND2C,HELLS,RMI2,APOBEC2,KIF24,KIF23,KIF22,CIT,TUBB2A,INCENP,KIFC1,ADSSL1,CKS2,KIF2C,SMTNL2,PCNA,PRIM1,TYMS,CENPA,UNG,RAD54B,PSMC3IP,USP1,RAD54L,GINS1,CENPU,CDKN2C,ATAD5,GINS3,ATAD2,CENPE,CENPF,MIS18A,CENPH,CENPI,CENPM,CENPN,AUNIP,TRIP13,SPC24,CDKN3,MAD2L1,ERCC6L,ZWILCH,DSCC1,GMNN,BUB1B,TTF2,CCND1,KNTC1,TMEM38A,GEN1,SEMA6C,GAS2L3,LIG1,VRK1,CDC25C,TRAIP,MSH6,MELK,CCNE2,MSH2,HAT1,BLM,DNMT1,TROAP,ARHGAP19,PKMYT1,RAD51AP1,CCNB2,CCNB1,ORC1,CLSPN,ECT2,FAM83D,FANCI,STIL,UBE2C,CXCL10,DIAPH3,NASP,UBE2T,CDK1,TRIM72,MCM8,CDCA7L,HMGB2,MCM10,FOXM1,CHTF18,LMNB1,EXO1,MYBL2,SPDL1,TOPBP1,MYBL1,POLE,RFC5,RFC3,RFC4,CKAP2,MASTL,SPTB,CCNA2,MMS22L,ASPM,RBL1,DBF4,ESPL1,SAPCD2,MCM3,MCM4,BIRC5,TRIM59,MCM5,DNAJC9,MCM6,MTFR2,NEMP1,DCTPP1,DTL,MCM2,HEMGN,UHRF1,TTK,THBS1,CLCN1,AURKB,ASB16,AURKA,P2RY2,POLD1,E2F1,LRIG1,BUB1,E2F7,RRM1,DUT,RRM2,SPAG5,MND1,PPP2R3A,TICRR,RAD51,PRC1","199","294.7","","E2f8","false","false","","Unclustered","2.0","Unclustered","2.0","ENSMUSG00000046179"
"264","ARCHS4 Coexpression,114;Enrichr Queries,296;GTEx Coexpression,395","SEMA5A,RAB3B,CHPF,IRS1,TUSC3,RORA,ETS1,SLC4A4,CLDN1,TMEM263,IGF1R,LGALS3,SCGN,CCND1,CDH2,LIPG,CREB3L2,DPYSL3,CAPN2,PDE8B,SLC12A8,TGM2,IER3,PDIA3,EPHA4,CASR,IL1R1,IGFBP3,DIO1,ARID5B,FRMD4A,PDIA6,TLE6,TANC2,DCTD,ADAM19,MAP1B,ADAM12,COL8A1,SCG3,NUPR1,MXRA7,CFTR,SDC4,FAM114A1,ITPR2,CNN3,GRK2,INPP5D,PDGFC,IGFBP7,SRGAP1,ST3GAL1,PPARGC1B,TMEM184C,EGR2,TGFB2,DTNA,CADM1,NEBL,BDNF,SLC33A1,CRIM1,FBXO32,MCC,MANF,CXCL10,SDK1,DAP,PLCXD3,CDK6,FXYD2,DNAJC10,ID4,CPE,RGL3,CALR,SLC26A4,CDK14,PAM,FERMT2,LRP11,NRP1,PCSK1,TENM3,TENM4,PTPRN,TDRP,PTPRM,RCSD1,SYNE1,LIMD2,SPN,HHEX,MECOM,SCRN1,UCN3,TIMP2,TIMP3,CD53,MMP7,DST,SLC2A10,ABCC8,MYOF,NAV1,GFRA1,PAX6,CKAP4,PARD3B,DNAJC3,BACE1,B3GNT9,RCN1,ASPH,PLSCR4,KCNMA1,MCM3,CRELD2,DOCK2,SDCCAG8,CD63,SLC43A3,LAMA4,FAM129A,THBS1,THSD4,AURKB,SLC25A29,NT5E,SLIT1,LRIG1,SPOCK1,SLIT2,TPBG,BMP8A,SORBS2,KLF4,SORL1,TMCO3,FAM167A,NFIB,PABPC1L,VIM,SEC24D","173","268.3","","Glis3","false","false","","Unclustered","0.0","Unclustered","0.0","ENSMUSG00000052942"
"263","ARCHS4 Coexpression,305;Enrichr Queries,217;GTEx Coexpression,301","FOXA1,SEMA5A,ANKRD35,IRS1,FRMPD1,RORA,CLDN1,IGF1R,HID1,PREX1,ARHGAP40,CCND1,BASP1,MYB,DPYSL3,LIPK,TNS4,EPHA4,UNC5A,TMEM178B,CACNA2D2,MYT1,OVOL2,FAM227A,DISP2,OLFM1,LMX1A,CLDN8,LGALS12,HOXB8,COL17A1,SDC4,CACNA1A,CACNA1C,NREP,APCDD1,FUT1,CACNA1H,RAP1GAP,ALDH3B2,TRPM2,FAM221A,KLC3,RDH12,STC2,MAP6,ST8SIA6,NPTX1,NPTX2,SCN3B,WNT3,PLXNA4,B4GALNT4,NGFR,TMEM86A,EGR2,GSDMA,CADM1,BDNF,NFATC2,HMGA2,INHBB,ESRRG,POU2F3,SYT7,DCLK1,SDK1,CXCL10,EFNA3,GJB3,LYPD6B,LHX1,MYO5C,SP6,XKR4,FGFR3,CDKN1C,RET,COL18A1,CNTNAP2,PTPRU,TENM4,GRIK3,CELF5,TFCP2L1,CX3CL1,LFNG,SPRED3,C1QTNF1,TUBA1A,MECOM,EFHD1,KIF1A,TRIM67,APC2,SMIM14,RPS6KL1,DST,TPSG1,TNFRSF19,DENND2A,GFRA1,PAX6,EMP2,PROX1,ETV6,MN1,NR5A2,KIT,KCNMA1,SPACA6,CRMP1,ADCY1,THBS1,THSD4,AURKB,SERTAD4,RASSF10,RNF39,SLIT1,LRIG1,SPOCK1,HES1,SPTSSB,MSX1,PAK3,SPDEF,SLC12A2,PLA2G2F,KCNB1,IRX4,AHNAK2,KRT10,SYT13,KLF4,TPD52L1,POU4F1,DLK1,SMOC2,SLC4A8,NFASC,MLPH,ABI2,NFIB,KRT15,TRIM37,INSM1","180","274.3","","Lmx1b","false","false","","Unclustered","0.0","Unclustered","0.0","ENSMUSG00000038765"
"262","","",,,"","Rgl3","false","false","","Unclustered","0.0","Unclustered","0.0","ENSMUSG00000040146"
"261","","",,,"","Cacna1c","false","false","","Unclustered","0.6666666666666666","Unclustered","0.6666666666666666","ENSMUSG00000051331"
"259","","",,,"Cluster 2","Gm30173","false","false","","Unclustered","6.0","Clustered","7.0","ENSMUSG00000103965"
"258","","",,,"Cluster 1","Gm43861","false","false","","Unclustered","5.785714285714286","Clustered","9.0","ENSMUSG00000105146"
"257","","",,,"","Gm12511","false","false","","Unclustered","3.4285714285714284","Unclustered","4.285714285714286","ENSMUSG00000066176"
"254","","",,,"","Gm42426","false","false","","Unclustered","3.7333333333333334","Unclustered","6.0","ENSMUSG00000106658"
"252","","",,,"Cluster 2","Gm30414","false","false","","Unclustered","5.0","Clustered","7.0","ENSMUSG00000103067"
"251","","",,,"","RP23-145I16.5","false","false","","Unclustered","0.0","Unclustered","0.0","ENSMUSG00000109936"
"250","","",,,"Cluster 2","RP23-128A23.2","false","false","","Unclustered","4.761904761904762","Clustered","7.0","ENSMUSG00000111043"
"249","","",,,"","Dbpht2","false","false","","Unclustered","2.7","Unclustered","3.6","ENSMUSG00000029878"
"248","","",,,"","2810429I04Rik","false","false","","Unclustered","4.761904761904762","Unclustered","5.7142857142857135","ENSMUSG00000097709"
"247","","",,,"","Gm29590","false","false","","Unclustered","5.0","Unclustered","7.0","ENSMUSG00000100022"
"246","","",,,"","Fam120aos","false","false","","Unclustered","2.0","Unclustered","2.0","ENSMUSG00000097059"
"242","","",,,"","Gm45330","false","false","","Unclustered","4.0","Unclustered","4.333333333333334","ENSMUSG00000110276"
"241","","",,,"","9330102E08Rik","false","false","","Unclustered","0.6666666666666666","Unclustered","0.6666666666666666","ENSMUSG00000107879"
"240","","",,,"","Gm43949","false","false","","Unclustered","0.0","Unclustered","0.0","ENSMUSG00000107728"
"239","","",,,"Cluster 1","AU020206","false","false","","Unclustered","5.785714285714286","Clustered","9.0","ENSMUSG00000097415"
"238","","",,,"","4933406P04Rik","false","false","","Unclustered","0.0","Unclustered","0.0","ENSMUSG00000069713"
"237","","",,,"","RP23-212C9.3","false","false","","Unclustered","4.0","Unclustered","5.0","ENSMUSG00000110866"
"236","","",,,"Cluster 2","Gm27162","false","false","","Unclustered","6.0","Clustered","7.0","ENSMUSG00000099025"
"235","","",,,"","RP24-499N24.6","false","false","","Unclustered","4.464285714285714","Unclustered","7.0","ENSMUSG00000111528"
"234","","",,,"","RP23-392I13.13","false","false","","Unclustered","2.0","Unclustered","3.0","ENSMUSG00000111857"
"233","","",,,"","Gm11496","false","false","","Unclustered","4.0","Unclustered","5.0","ENSMUSG00000085152"
"232","","",,,"","Gm4319","false","false","","Unclustered","5.571428571428571","Unclustered","6.5","ENSMUSG00000102123"
"231","","",,,"","5730419F03Rik","false","false","","Unclustered","3.4285714285714284","Unclustered","4.285714285714286","ENSMUSG00000099364"
"230","","",,,"Cluster 2","AW112010","false","false","","Unclustered","4.761904761904762","Clustered","8.0","ENSMUSG00000075010"
"228","","",,,"","Gm13373","false","false","","Unclustered","5.0","Unclustered","5.0","ENSMUSG00000087196"
"227","","",,,"","9030622O22Rik","false","false","","Unclustered","3.0","Unclustered","3.0","ENSMUSG00000086141"
"226","","",,,"Cluster 1","2810404F17Rik","false","false","","Unclustered","8.836363636363636","Clustered","10.333333333333334","ENSMUSG00000085329"
"225","","",,,"","1700040D17Rik","false","false","","Unclustered","4.0","Unclustered","4.333333333333334","ENSMUSG00000097515"
"224","","",,,"","Gm43042","false","false","","Unclustered","2.0","Unclustered","3.0","ENSMUSG00000106634"
"223","","",,,"Cluster 2","Tbx3os2","false","false","","Unclustered","4.761904761904762","Clustered","7.0","ENSMUSG00000086847"
"222","","",,,"","#N/A","false","false","","Unclustered","3.0","Unclustered","3.0","mmu-miR-101c"
"220","","",,,"","1700001L05Rik","false","false","","Unclustered","0.0","Unclustered","0.0","ENSMUSG00000075511"
"219","","",,,"","Xist","false","false","","Unclustered","0.2222222222222222","Unclustered","0.2222222222222222","ENSMUSG00000086503"
"218","","",,,"","Gdap10","false","false","","Unclustered","0.5","Unclustered","0.5","ENSMUSG00000096954"
"217","","",,,"","#N/A","false","false","","Unclustered","1.2","Unclustered","1.2","mmu-miR-222-3p"
"216","","",,,"","Gm26722","false","false","","Unclustered","0.6666666666666666","Unclustered","0.6666666666666666","ENSMUSG00000096944"
"215","","",,,"","Gm29253","false","false","","Unclustered","0.25","Unclustered","0.25","ENSMUSG00000099519"
"214","ARCHS4 Coexpression,474;Enrichr Queries,191;GTEx Coexpression,1053","NRROS,IRS1,NCF2,RORA,FRY,NR3C1,MKI67,ETS1,SLC8A1,IGF1R,PREX1,CCND1,BASP1,NIPAL2,DPYSL2,MYC,CHEK2,RASSF5,MYB,LONP1,CEP250,PLXNC1,EPHA4,LIG1,DAPK1,IGFBP4,SYTL1,ARID5B,FRMD4A,MPEG1,ADAM19,TIAM1,RIN3,CARD11,NOTCH1,AKNA,TCF7,CACNA1A,ZFP36L2,BCL2L11,GRK2,INPP5D,HIVEP3,S100A14,ST3GAL1,ZBTB7C,CARMIL2,CADM1,DENND4B,CRIM1,NFATC2,HMGA2,NBEAL2,ABCA7,FBXO32,RAET1E,CDK6,RGL1,ITM2C,TOP2A,DENND1C,NRP1,BTG2,CCDC120,TENM4,CELF2,DOCK8,ATP2A3,CHTF18,ITGAL,LMNB1,SYNE1,LIMD2,LFNG,PSTPIP1,DUSP10,GM2A,SH3PXD2A,ADGRE5,PLEKHN1,EMB,RMI2,KLF12,CAMK1D,DST,MYOF,NAV1,KLF15,ETV6,CIT,APBB1IP,FGR,HCK,ESPL1,SETBP1,RASA3,TBC1D4,KCNMA1,RHOV,DOCK2,PLCB2,MGLL,RGS14,FAM129A,NLRC3,ADD3,CXXC5,ASCL2,THBS1,AURKB,ABLIM1,SH3BP1,ALOX5,LRIG1,SORBS2,KLF4,SORL1,FMNL1,FABP5,NFIB,KRT15","617","572.7","","Trerf1","false","false","","Unclustered","0.4","Unclustered","0.4","ENSMUSG00000064043"
"213","","",,,"","Peg13","false","false","","Unclustered","0.4","Unclustered","0.4","ENSMUSG00000106847"
"212","","",,,"","#N/A","false","false","","Unclustered","0.6666666666666666","Unclustered","0.6666666666666666","mmu-miR-497a-5p"
"211","","",,,"","1500011B03Rik","false","false","","Unclustered","0.4","Unclustered","0.4","ENSMUSG00000072694"
"209","","",,,"","Gm20634","false","false","","Unclustered","0.5","Unclustered","0.5","ENSMUSG00000070392"
"208","","",,,"","#N/A","false","false","","Unclustered","0.2855631940772078","Unclustered","0.2855631940772078","mmu-miR-677-5p"
"207","","",,,"","#N/A","false","false","","Unclustered","1.0476190476190477","Unclustered","1.0476190476190477","mmu-miR-210-3p"
"206","","",,,"","#N/A","false","false","","Unclustered","0.7111111111111111","Unclustered","0.7111111111111111","mmu-miR-130a-3p"
"205","","",,,"","#N/A","false","false","","Unclustered","0.0","Unclustered","0.0","mmu-miR-195a-5p"
"204","","",,,"","#N/A","false","false","","Unclustered","1.3636363636363635","Unclustered","1.2307692307692308","mmu-let-7e-5p"
"202","","",,,"","2810025M15Rik","false","false","","Unclustered","0.0","Unclustered","0.0","ENSMUSG00000049881"
"201","","",,,"","1810034E14Rik","false","false","","Unclustered","0.0","Unclustered","0.0","ENSMUSG00000097101"
"200","","",,,"","#N/A","false","false","","Unclustered","2.708333333333333","Unclustered","2.536764705882353","mmu-miR-218-5p"
"199","","",,,"","#N/A","false","false","","Unclustered","2.1025641025641026","Unclustered","2.1025641025641026","mmu-miR-152-3p"
"198","","",,,"","D230017M19Rik","false","false","","Unclustered","0.0","Unclustered","0.0","ENSMUSG00000097131"
"197","","",,,"","#N/A","false","false","","Unclustered","0.0","Unclustered","0.0","mmu-miR-127-3p"
"196","","",,,"","#N/A","false","false","","Unclustered","0.0","Unclustered","0.0","mmu-miR-574-3p"
"195","","",,,"","#N/A","false","false","","Unclustered","0.0","Unclustered","0.0","mmu-miR-411-5p"
"194","","",,,"","#N/A","false","false","","Unclustered","0.6666666666666666","Unclustered","0.6666666666666666","mmu-miR-434-3p"
"193","","",,,"","Trim37","false","false","","Unclustered","0.6666666666666666","Unclustered","0.6666666666666666","ENSMUSG00000018548"
"192","","",,,"","Trim35","false","false","","Unclustered","0.6666666666666666","Unclustered","0.6666666666666666","ENSMUSG00000022043"
"191","","",,,"","Xpo4","false","false","","Unclustered","0.3333333333333333","Unclustered","0.3333333333333333","ENSMUSG00000021952"
"190","","",,,"","Slc33a1","false","false","","Unclustered","0.0","Unclustered","0.0","ENSMUSG00000027822"
"189","","",,,"","Tmed8","false","false","","Unclustered","0.5","Unclustered","0.5","ENSMUSG00000034111"
"188","","",,,"","Slc7a2","false","false","","Unclustered","0.4","Unclustered","0.4","ENSMUSG00000031596"
"187","","",,,"","Smim14","false","false","","Unclustered","0.5","Unclustered","0.5","ENSMUSG00000037822"
"186","","",,,"","Pde3a","false","false","","Unclustered","0.3333333333333333","Unclustered","0.3333333333333333","ENSMUSG00000041741"
"185","","",,,"","Vmac","false","false","","Unclustered","0.0","Unclustered","0.0","ENSMUSG00000054723"
"184","","",,,"","#N/A","false","false","","Unclustered","0.0","Unclustered","0.0","mmu-miR-540-3p"
"183","ARCHS4 Coexpression,76;GTEx Coexpression,160","RAB3C,TUSC3,STMN3,DACH2,HS6ST2,NUDT10,SYNPR,KIF5C,TMOD2,SERPINF2,CPT1C,TMEM130,RUNDC3A,MAPK8IP1,EML5,OLFM1,MAP1A,SCG2,TSPYL4,NGEF,BRSK1,BEX2,NDRG4,STXBP1,ARX,HPCA,CPLX2,RAP1GAP,MAP2,CYP11A1,SARAF,MAP6,NXPH1,KIF3C,SCN3A,RAB6B,MAP9,RAB11FIP4,PACSIN1,FZD3,MAGEE1,SYT1,ST8SIA3,SYT7,DCLK1,GNAO1,PEX5L,KLHDC8A,DLG4,GNB5,CD200,SNAP25,TMEM151B,TENM4,PTPRN,RASGRF1,DIRAS2,GRIK4,CELF5,CELF6,SYNE1,UNC80,JPH4,KCNT1,PCLO,SLC22A17,DNER,IDS,KIF1A,SULT4A1,PSD,PIANP,MANEAL,SYP,SYN2,SYN1,CNKSR2,KCNMA1,MAPRE3,HAP1,PLCB1,SCN4B,VAMP2,RAPGEF4,CAMK2B,MAGEH1,CRMP1,ADCY1,CXXC4,PHYHIP,TCEAL5,SV2A,GNG4,CAMK2N1,MBNL3,CCDC184,GABBR2,GABRA1,CADPS,SYT16,LHFPL4,PNMA2,GRIN1,STXBP5L,TTLL7,SLC4A8,TTC8,KBTBD6,FMNL2,ABI2,MORN4,SYT11,APBA1,HCN1","43","118.0","","Peg3","false","false","","Unclustered","0.4","Unclustered","0.4","ENSMUSG00000002265"
"182","","",,,"","Serp1","false","false","","Unclustered","0.5","Unclustered","0.5","ENSMUSG00000027808"
"181","","",,,"","Plekha2","false","false","","Unclustered","0.6666666666666666","Unclustered","0.6666666666666666","ENSMUSG00000031557"
"180","","",,,"","Atp6v1b2","false","false","","Unclustered","0.6666666666666666","Unclustered","0.6666666666666666","ENSMUSG00000006273"
"179","","",,,"","Tmbim4","false","false","","Unclustered","0.6666666666666666","Unclustered","0.6666666666666666","ENSMUSG00000020225"
"178","","",,,"","Acss2","false","false","","Unclustered","0.0","Unclustered","0.0","ENSMUSG00000027605"
"177","","",,,"","Zfp367","false","false","","Unclustered","0.6666666666666666","Unclustered","0.6666666666666666","ENSMUSG00000044934"
"176","","",,,"","#N/A","false","false","","Unclustered","2.0","Unclustered","2.0","mmu-miR-350-5p"
"175","","",,,"","Cyp2c29","false","false","","Unclustered","0.0","Unclustered","0.0","ENSMUSG00000003053"
"174","","",,,"","Aqp9","false","false","","Unclustered","0.0","Unclustered","0.0","ENSMUSG00000032204"
"173","","",,,"","Dnajb9","false","false","","Unclustered","0.6666666666666666","Unclustered","0.6666666666666666","ENSMUSG00000014905"
"172","","",,,"","Map3k14","false","false","","Unclustered","0.0","Unclustered","0.0","ENSMUSG00000020941"
"171","","",,,"","Fbxo32","false","false","","Unclustered","0.5","Unclustered","0.5","ENSMUSG00000022358"
"170","","",,,"","Trip13","false","false","","Unclustered","0.0","Unclustered","0.0","ENSMUSG00000021569"
"169","","",,,"","Pfkfb1","false","false","","Unclustered","0.0","Unclustered","0.0","ENSMUSG00000025271"
"168","","",,,"","Plk1","false","false","","Unclustered","0.0","Unclustered","0.0","ENSMUSG00000030867"
"167","","",,,"","Slco2b1","false","false","","Unclustered","0.0","Unclustered","0.0","ENSMUSG00000030737"
"166","","",,,"","Pik3ip1","false","false","","Unclustered","0.0","Unclustered","0.0","ENSMUSG00000034614"
"165","","",,,"","Ctdspl2","false","false","","Unclustered","0.6666666666666666","Unclustered","0.6666666666666666","ENSMUSG00000033411"
"164","","",,,"","Atr","false","false","","Unclustered","0.0","Unclustered","0.0","ENSMUSG00000032409"
[truncated: 12,411 more chars]
