# Supplementary material for: Regulatory network analysis of Paneth cell and goblet cell enriched gut organoids using transcriptomics approaches
Source: Royal Society of Chemistry journal article supplement (doi:10.1039/c9mo00130a), 2019-12-10
Supplement: c9mo00130a2.cys [file c9mo00130a2.cys › CytoscapeSession-2019_09_26-21_57/tables/62-Gob_network_lfc1.txt/LOCAL_ATTRS-org.cytoscape.model.CyEdge-Gob_network_lfc1.txt+default+edge.cytable]

CyCSV-Version	1
SUID	interaction	name	selected
java.lang.Long	java.lang.String	java.lang.String	java.lang.Boolean
Gob_network_lfc1.txt default edge
2198	miRNA-mRNA	mmu-miR-125b-1-3p (miRNA-mRNA) ENSMUSG00000068923	false
2199	miRNA-mRNA	mmu-miR-125b-1-3p (miRNA-mRNA) ENSMUSG00000029516	false
2200	miRNA-mRNA	mmu-miR-125b-1-3p (miRNA-mRNA) ENSMUSG00000025352	false
2201	miRNA-mRNA	mmu-miR-125b-1-3p (miRNA-mRNA) ENSMUSG00000049858	false
2202	miRNA-mRNA	mmu-miR-125b-1-3p (miRNA-mRNA) ENSMUSG00000013698	false
2203	miRNA-mRNA	mmu-miR-125b-1-3p (miRNA-mRNA) ENSMUSG00000055296	false
2204	miRNA-mRNA	mmu-miR-125b-1-3p (miRNA-mRNA) ENSMUSG00000031004	false
2205	miRNA-mRNA	mmu-miR-125b-1-3p (miRNA-mRNA) ENSMUSG00000027797	false
2206	miRNA-mRNA	mmu-miR-125b-1-3p (miRNA-mRNA) ENSMUSG00000024302	false
2207	miRNA-mRNA	mmu-miR-125b-1-3p (miRNA-mRNA) ENSMUSG00000039485	false
2208	miRNA-mRNA	mmu-miR-221-5p (miRNA-mRNA) ENSMUSG00000080316	false
2209	miRNA-mRNA	mmu-miR-134-5p (miRNA-mRNA) ENSMUSG00000008575	false
2210	miRNA-mRNA	mmu-miR-676-3p (miRNA-mRNA) ENSMUSG00000016526	false
2211	miRNA-mRNA	mmu-miR-125a-5p (miRNA-mRNA) ENSMUSG00000026473	false
2212	miRNA-mRNA	mmu-miR-125a-5p (miRNA-mRNA) ENSMUSG00000033684	false
2213	miRNA-mRNA	mmu-miR-125a-5p (miRNA-mRNA) ENSMUSG00000030029	false
2214	miRNA-mRNA	mmu-miR-125a-5p (miRNA-mRNA) ENSMUSG00000028108	false
2215	miRNA-mRNA	mmu-miR-125a-5p (miRNA-mRNA) ENSMUSG00000039231	false
2216	miRNA-mRNA	mmu-miR-125a-5p (miRNA-mRNA) ENSMUSG00000027242	false
2217	miRNA-mRNA	mmu-miR-125a-5p (miRNA-mRNA) ENSMUSG00000027947	false
2218	miRNA-mRNA	mmu-miR-125a-5p (miRNA-mRNA) ENSMUSG00000032238	false
2219	miRNA-mRNA	mmu-miR-125a-5p (miRNA-mRNA) ENSMUSG00000029570	false
2220	miRNA-mRNA	mmu-miR-125a-5p (miRNA-mRNA) ENSMUSG00000021136	false
2221	miRNA-mRNA	mmu-miR-125a-5p (miRNA-mRNA) ENSMUSG00000020534	false
2222	miRNA-mRNA	mmu-miR-125a-5p (miRNA-mRNA) ENSMUSG00000009575	false
2223	miRNA-mRNA	mmu-miR-125a-5p (miRNA-mRNA) ENSMUSG00000020592	false
2224	miRNA-mRNA	mmu-miR-125a-5p (miRNA-mRNA) ENSMUSG00000021364	false
2225	miRNA-mRNA	mmu-miR-125a-5p (miRNA-mRNA) ENSMUSG00000018899	false
2226	miRNA-mRNA	mmu-miR-125a-5p (miRNA-mRNA) ENSMUSG00000001435	false
2227	miRNA-mRNA	mmu-miR-125a-5p (miRNA-mRNA) ENSMUSG00000021952	false
2228	miRNA-mRNA	mmu-miR-125a-5p (miRNA-mRNA) ENSMUSG00000026072	false
2229	miRNA-mRNA	mmu-miR-125a-5p (miRNA-mRNA) ENSMUSG00000020423	false
2230	miRNA-mRNA	mmu-miR-125a-5p (miRNA-mRNA) ENSMUSG00000000751	false
2231	miRNA-mRNA	mmu-miR-410-3p (miRNA-mRNA) ENSMUSG00000023050	false
2232	miRNA-mRNA	mmu-miR-153-3p (miRNA-mRNA) ENSMUSG00000056812	false
2233	miRNA-mRNA	mmu-miR-153-3p (miRNA-mRNA) ENSMUSG00000047139	false
2234	miRNA-mRNA	mmu-miR-153-3p (miRNA-mRNA) ENSMUSG00000049858	false
2235	miRNA-mRNA	mmu-miR-153-3p (miRNA-mRNA) ENSMUSG00000049044	false
2236	miRNA-mRNA	mmu-miR-153-3p (miRNA-mRNA) ENSMUSG00000049281	false
2237	miRNA-mRNA	mmu-miR-153-3p (miRNA-mRNA) ENSMUSG00000062078	false
2238	miRNA-mRNA	mmu-miR-153-3p (miRNA-mRNA) ENSMUSG00000046352	false
2239	miRNA-mRNA	mmu-miR-153-3p (miRNA-mRNA) ENSMUSG00000046613	false
2240	miRNA-mRNA	mmu-miR-153-3p (miRNA-mRNA) ENSMUSG00000040896	false
2241	miRNA-mRNA	mmu-miR-153-3p (miRNA-mRNA) ENSMUSG00000055745	false
2242	miRNA-mRNA	mmu-miR-153-3p (miRNA-mRNA) ENSMUSG00000051111	false
2243	miRNA-mRNA	mmu-miR-153-3p (miRNA-mRNA) ENSMUSG00000048373	false
2244	miRNA-mRNA	mmu-miR-153-3p (miRNA-mRNA) ENSMUSG00000053963	false
2245	miRNA-mRNA	mmu-miR-153-3p (miRNA-mRNA) ENSMUSG00000052727	false
2246	miRNA-mRNA	mmu-miR-153-3p (miRNA-mRNA) ENSMUSG00000040209	false
2247	miRNA-mRNA	mmu-miR-153-3p (miRNA-mRNA) ENSMUSG00000051951	false
2248	miRNA-mRNA	mmu-miR-153-3p (miRNA-mRNA) ENSMUSG00000050556	false
2249	miRNA-mRNA	mmu-miR-153-3p (miRNA-mRNA) ENSMUSG00000059742	false
2250	miRNA-mRNA	mmu-miR-153-3p (miRNA-mRNA) ENSMUSG00000060961	false
2251	miRNA-mRNA	mmu-miR-153-3p (miRNA-mRNA) ENSMUSG00000031647	false
2252	miRNA-mRNA	mmu-miR-153-3p (miRNA-mRNA) ENSMUSG00000038264	false
2253	miRNA-mRNA	mmu-miR-153-3p (miRNA-mRNA) ENSMUSG00000032575	false
2254	miRNA-mRNA	mmu-miR-153-3p (miRNA-mRNA) ENSMUSG00000035967	false
2255	miRNA-mRNA	mmu-miR-153-3p (miRNA-mRNA) ENSMUSG00000037712	false
2256	miRNA-mRNA	mmu-miR-153-3p (miRNA-mRNA) ENSMUSG00000032549	false
2257	miRNA-mRNA	mmu-miR-153-3p (miRNA-mRNA) ENSMUSG00000038555	false
2258	miRNA-mRNA	mmu-miR-153-3p (miRNA-mRNA) ENSMUSG00000030353	false
2259	miRNA-mRNA	mmu-miR-153-3p (miRNA-mRNA) ENSMUSG00000037852	false
2260	miRNA-mRNA	mmu-miR-153-3p (miRNA-mRNA) ENSMUSG00000031442	false
2261	miRNA-mRNA	mmu-miR-153-3p (miRNA-mRNA) ENSMUSG00000032902	false
2262	miRNA-mRNA	mmu-miR-153-3p (miRNA-mRNA) ENSMUSG00000032854	false
2263	miRNA-mRNA	mmu-miR-153-3p (miRNA-mRNA) ENSMUSG00000031749	false
2264	miRNA-mRNA	mmu-miR-153-3p (miRNA-mRNA) ENSMUSG00000036745	false
2265	miRNA-mRNA	mmu-miR-153-3p (miRNA-mRNA) ENSMUSG00000036422	false
2266	miRNA-mRNA	mmu-miR-153-3p (miRNA-mRNA) ENSMUSG00000034701	false
2267	miRNA-mRNA	mmu-miR-153-3p (miRNA-mRNA) ENSMUSG00000038255	false
2268	miRNA-mRNA	mmu-miR-153-3p (miRNA-mRNA) ENSMUSG00000026473	false
2269	miRNA-mRNA	mmu-miR-153-3p (miRNA-mRNA) ENSMUSG00000025738	false
2270	miRNA-mRNA	mmu-miR-153-3p (miRNA-mRNA) ENSMUSG00000026235	false
2271	miRNA-mRNA	mmu-miR-153-3p (miRNA-mRNA) ENSMUSG00000024302	false
2272	miRNA-mRNA	mmu-miR-153-3p (miRNA-mRNA) ENSMUSG00000026764	false
2273	miRNA-mRNA	mmu-miR-153-3p (miRNA-mRNA) ENSMUSG00000023036	false
2274	miRNA-mRNA	mmu-miR-153-3p (miRNA-mRNA) ENSMUSG00000026360	false
2275	miRNA-mRNA	mmu-miR-153-3p (miRNA-mRNA) ENSMUSG00000025867	false
2276	miRNA-mRNA	mmu-miR-153-3p (miRNA-mRNA) ENSMUSG00000029121	false
2277	miRNA-mRNA	mmu-miR-153-3p (miRNA-mRNA) ENSMUSG00000030275	false
2278	miRNA-mRNA	mmu-miR-153-3p (miRNA-mRNA) ENSMUSG00000024411	false
2279	miRNA-mRNA	mmu-miR-153-3p (miRNA-mRNA) ENSMUSG00000026833	false
2280	miRNA-mRNA	mmu-miR-153-3p (miRNA-mRNA) ENSMUSG00000029033	false
2281	miRNA-mRNA	mmu-miR-153-3p (miRNA-mRNA) ENSMUSG00000027273	false
2282	miRNA-mRNA	mmu-miR-153-3p (miRNA-mRNA) ENSMUSG00000010175	false
2283	miRNA-mRNA	mmu-miR-153-3p (miRNA-mRNA) ENSMUSG00000003814	false
2284	miRNA-mRNA	mmu-miR-153-3p (miRNA-mRNA) ENSMUSG00000022505	false
2285	miRNA-mRNA	mmu-miR-153-3p (miRNA-mRNA) ENSMUSG00000015222	false
2286	miRNA-mRNA	mmu-miR-153-3p (miRNA-mRNA) ENSMUSG00000020044	false
2287	miRNA-mRNA	mmu-miR-153-3p (miRNA-mRNA) ENSMUSG00000000416	false
2288	miRNA-mRNA	mmu-miR-153-3p (miRNA-mRNA) ENSMUSG00000002265	false
2289	miRNA-mRNA	mmu-miR-153-3p (miRNA-mRNA) ENSMUSG00000006386	false
2290	miRNA-mRNA	mmu-miR-153-3p (miRNA-mRNA) ENSMUSG00000002107	false
2291	miRNA-mRNA	mmu-miR-153-3p (miRNA-mRNA) ENSMUSG00000020576	false
2292	miRNA-mRNA	mmu-miR-153-3p (miRNA-mRNA) ENSMUSG00000002341	false
2293	miRNA-mRNA	mmu-miR-153-3p (miRNA-mRNA) ENSMUSG00000020894	false
2294	miRNA-mRNA	mmu-miR-153-3p (miRNA-mRNA) ENSMUSG00000022048	false
2295	miRNA-mRNA	mmu-miR-153-3p (miRNA-mRNA) ENSMUSG00000000594	false
2296	miRNA-mRNA	mmu-miR-153-3p (miRNA-mRNA) ENSMUSG00000010307	false
2297	miRNA-mRNA	mmu-miR-153-3p (miRNA-mRNA) ENSMUSG00000009394	false
2298	miRNA-mRNA	mmu-miR-153-3p (miRNA-mRNA) ENSMUSG00000020431	false
2299	miRNA-mRNA	mmu-miR-153-3p (miRNA-mRNA) ENSMUSG00000005533	false
2300	miRNA-mRNA	mmu-miR-153-3p (miRNA-mRNA) ENSMUSG00000007989	false
2301	miRNA-mRNA	mmu-miR-350-5p (miRNA-mRNA) ENSMUSG00000026398	false
2302	miRNA-mRNA	mmu-miR-350-5p (miRNA-mRNA) ENSMUSG00000030087	false
2303	miRNA-mRNA	mmu-miR-350-5p (miRNA-mRNA) ENSMUSG00000032204	false
2304	miRNA-mRNA	mmu-miR-350-5p (miRNA-mRNA) ENSMUSG00000021876	false
2305	miRNA-mRNA	mmu-miR-350-5p (miRNA-mRNA) ENSMUSG00000003053	false
2306	miRNA-mRNA	mmu-miR-350-5p (miRNA-mRNA) ENSMUSG00000034349	false
2307	miRNA-mRNA	mmu-miR-540-3p (miRNA-mRNA) ENSMUSG00000040274	false
2308	miRNA-mRNA	mmu-miR-434-3p (miRNA-mRNA) ENSMUSG00000020741	false
2309	miRNA-mRNA	mmu-miR-434-3p (miRNA-mRNA) ENSMUSG00000050052	false
2310	miRNA-mRNA	mmu-miR-411-5p (miRNA-mRNA) ENSMUSG00000007379	false
2311	miRNA-mRNA	mmu-miR-574-3p (miRNA-mRNA) ENSMUSG00000021831	false
2312	lincRNA-miRNA	ENSMUSG00000097131 (lincRNA-miRNA) mmu-miR-127-3p	false
2313	miRNA-mRNA	mmu-miR-152-3p (miRNA-mRNA) ENSMUSG00000060671	false
2314	miRNA-mRNA	mmu-miR-152-3p (miRNA-mRNA) ENSMUSG00000058672	false
2315	miRNA-mRNA	mmu-miR-152-3p (miRNA-mRNA) ENSMUSG00000071547	false
2316	miRNA-mRNA	mmu-miR-152-3p (miRNA-mRNA) ENSMUSG00000068196	false
2317	miRNA-mRNA	mmu-miR-152-3p (miRNA-mRNA) ENSMUSG00000058799	false
2318	miRNA-mRNA	mmu-miR-152-3p (miRNA-mRNA) ENSMUSG00000074825	false
2319	miRNA-mRNA	mmu-miR-152-3p (miRNA-mRNA) ENSMUSG00000072082	false
2320	miRNA-mRNA	mmu-miR-152-3p (miRNA-mRNA) ENSMUSG00000062078	false
2321	miRNA-mRNA	mmu-miR-152-3p (miRNA-mRNA) ENSMUSG00000059493	false
2322	miRNA-mRNA	mmu-miR-152-3p (miRNA-mRNA) ENSMUSG00000051579	false
2323	miRNA-mRNA	mmu-miR-152-3p (miRNA-mRNA) ENSMUSG00000053460	false
2324	miRNA-mRNA	mmu-miR-152-3p (miRNA-mRNA) ENSMUSG00000049044	false
2325	miRNA-mRNA	mmu-miR-152-3p (miRNA-mRNA) ENSMUSG00000049807	false
2326	miRNA-mRNA	mmu-miR-152-3p (miRNA-mRNA) ENSMUSG00000052520	false
2327	miRNA-mRNA	mmu-miR-152-3p (miRNA-mRNA) ENSMUSG00000047963	false
2328	miRNA-mRNA	mmu-miR-152-3p (miRNA-mRNA) ENSMUSG00000047003	false
2329	miRNA-mRNA	mmu-miR-152-3p (miRNA-mRNA) ENSMUSG00000048970	false
2330	miRNA-mRNA	mmu-miR-152-3p (miRNA-mRNA) ENSMUSG00000054252	false
2331	miRNA-mRNA	mmu-miR-152-3p (miRNA-mRNA) ENSMUSG00000055296	false
2332	miRNA-mRNA	mmu-miR-152-3p (miRNA-mRNA) ENSMUSG00000042686	false
2333	miRNA-mRNA	mmu-miR-152-3p (miRNA-mRNA) ENSMUSG00000041995	false
2334	miRNA-mRNA	mmu-miR-152-3p (miRNA-mRNA) ENSMUSG00000041688	false
2335	miRNA-mRNA	mmu-miR-152-3p (miRNA-mRNA) ENSMUSG00000041741	false
2336	miRNA-mRNA	mmu-miR-152-3p (miRNA-mRNA) ENSMUSG00000044068	false
2337	miRNA-mRNA	mmu-miR-152-3p (miRNA-mRNA) ENSMUSG00000045838	false
2338	miRNA-mRNA	mmu-miR-152-3p (miRNA-mRNA) ENSMUSG00000042515	false
2339	miRNA-mRNA	mmu-miR-152-3p (miRNA-mRNA) ENSMUSG00000044005	false
2340	miRNA-mRNA	mmu-miR-152-3p (miRNA-mRNA) ENSMUSG00000044337	false
2341	miRNA-mRNA	mmu-miR-152-3p (miRNA-mRNA) ENSMUSG00000040717	false
2342	miRNA-mRNA	mmu-miR-152-3p (miRNA-mRNA) ENSMUSG00000040433	false
2343	miRNA-mRNA	mmu-miR-152-3p (miRNA-mRNA) ENSMUSG00000043154	false
2344	miRNA-mRNA	mmu-miR-152-3p (miRNA-mRNA) ENSMUSG00000042834	false
2345	miRNA-mRNA	mmu-miR-152-3p (miRNA-mRNA) ENSMUSG00000042675	false
2346	miRNA-mRNA	mmu-miR-152-3p (miRNA-mRNA) ENSMUSG00000039126	false
2347	miRNA-mRNA	mmu-miR-152-3p (miRNA-mRNA) ENSMUSG00000039831	false
2348	miRNA-mRNA	mmu-miR-152-3p (miRNA-mRNA) ENSMUSG00000038039	false
2349	miRNA-mRNA	mmu-miR-152-3p (miRNA-mRNA) ENSMUSG00000040118	false
2350	miRNA-mRNA	mmu-miR-152-3p (miRNA-mRNA) ENSMUSG00000037643	false
2351	miRNA-mRNA	mmu-miR-152-3p (miRNA-mRNA) ENSMUSG00000039384	false
2352	miRNA-mRNA	mmu-miR-152-3p (miRNA-mRNA) ENSMUSG00000038793	false
2353	miRNA-mRNA	mmu-miR-152-3p (miRNA-mRNA) ENSMUSG00000037942	false
2354	miRNA-mRNA	mmu-miR-152-3p (miRNA-mRNA) ENSMUSG00000038146	false
2355	miRNA-mRNA	mmu-miR-152-3p (miRNA-mRNA) ENSMUSG00000038648	false
2356	miRNA-mRNA	mmu-miR-152-3p (miRNA-mRNA) ENSMUSG00000037035	false
2357	miRNA-mRNA	mmu-miR-152-3p (miRNA-mRNA) ENSMUSG00000033684	false
2358	miRNA-mRNA	mmu-miR-152-3p (miRNA-mRNA) ENSMUSG00000033032	false
2359	miRNA-mRNA	mmu-miR-152-3p (miRNA-mRNA) ENSMUSG00000035164	false
2360	miRNA-mRNA	mmu-miR-152-3p (miRNA-mRNA) ENSMUSG00000034111	false
2361	miRNA-mRNA	mmu-miR-152-3p (miRNA-mRNA) ENSMUSG00000034591	false
2362	miRNA-mRNA	mmu-miR-152-3p (miRNA-mRNA) ENSMUSG00000033763	false
2363	miRNA-mRNA	mmu-miR-152-3p (miRNA-mRNA) ENSMUSG00000035158	false
2364	miRNA-mRNA	mmu-miR-152-3p (miRNA-mRNA) ENSMUSG00000032086	false
2365	miRNA-mRNA	mmu-miR-152-3p (miRNA-mRNA) ENSMUSG00000032733	false
2366	miRNA-mRNA	mmu-miR-152-3p (miRNA-mRNA) ENSMUSG00000032656	false
2367	miRNA-mRNA	mmu-miR-152-3p (miRNA-mRNA) ENSMUSG00000032397	false
2368	miRNA-mRNA	mmu-miR-152-3p (miRNA-mRNA) ENSMUSG00000032575	false
2369	miRNA-mRNA	mmu-miR-152-3p (miRNA-mRNA) ENSMUSG00000031903	false
2370	miRNA-mRNA	mmu-miR-152-3p (miRNA-mRNA) ENSMUSG00000030978	false
2371	miRNA-mRNA	mmu-miR-152-3p (miRNA-mRNA) ENSMUSG00000030353	false
2372	miRNA-mRNA	mmu-miR-152-3p (miRNA-mRNA) ENSMUSG00000030087	false
2373	miRNA-mRNA	mmu-miR-152-3p (miRNA-mRNA) ENSMUSG00000031561	false
2374	miRNA-mRNA	mmu-miR-152-3p (miRNA-mRNA) ENSMUSG00000032640	false
2375	miRNA-mRNA	mmu-miR-152-3p (miRNA-mRNA) ENSMUSG00000030946	false
2376	miRNA-mRNA	mmu-miR-152-3p (miRNA-mRNA) ENSMUSG00000031129	false
2377	miRNA-mRNA	mmu-miR-152-3p (miRNA-mRNA) ENSMUSG00000030275	false
2378	miRNA-mRNA	mmu-miR-152-3p (miRNA-mRNA) ENSMUSG00000032076	false
2379	miRNA-mRNA	mmu-miR-152-3p (miRNA-mRNA) ENSMUSG00000027346	false
2380	miRNA-mRNA	mmu-miR-152-3p (miRNA-mRNA) ENSMUSG00000027878	false
2381	miRNA-mRNA	mmu-miR-152-3p (miRNA-mRNA) ENSMUSG00000029195	false
2382	miRNA-mRNA	mmu-miR-152-3p (miRNA-mRNA) ENSMUSG00000028693	false
2383	miRNA-mRNA	mmu-miR-152-3p (miRNA-mRNA) ENSMUSG00000028737	false
2384	miRNA-mRNA	mmu-miR-152-3p (miRNA-mRNA) ENSMUSG00000028403	false
2385	miRNA-mRNA	mmu-miR-152-3p (miRNA-mRNA) ENSMUSG00000028926	false
2386	miRNA-mRNA	mmu-miR-152-3p (miRNA-mRNA) ENSMUSG00000027248	false
2387	miRNA-mRNA	mmu-miR-152-3p (miRNA-mRNA) ENSMUSG00000028207	false
2388	miRNA-mRNA	mmu-miR-152-3p (miRNA-mRNA) ENSMUSG00000027381	false
2389	miRNA-mRNA	mmu-miR-152-3p (miRNA-mRNA) ENSMUSG00000024512	false
2390	miRNA-mRNA	mmu-miR-152-3p (miRNA-mRNA) ENSMUSG00000024660	false
2391	miRNA-mRNA	mmu-miR-152-3p (miRNA-mRNA) ENSMUSG00000026683	false
2392	miRNA-mRNA	mmu-miR-152-3p (miRNA-mRNA) ENSMUSG00000026482	false
2393	miRNA-mRNA	mmu-miR-152-3p (miRNA-mRNA) ENSMUSG00000025969	false
2394	miRNA-mRNA	mmu-miR-152-3p (miRNA-mRNA) ENSMUSG00000026605	false
2395	miRNA-mRNA	mmu-miR-152-3p (miRNA-mRNA) ENSMUSG00000026131	false
2396	miRNA-mRNA	mmu-miR-152-3p (miRNA-mRNA) ENSMUSG00000024501	false
2397	miRNA-mRNA	mmu-miR-152-3p (miRNA-mRNA) ENSMUSG00000026235	false
2398	miRNA-mRNA	mmu-miR-152-3p (miRNA-mRNA) ENSMUSG00000026657	false
2399	miRNA-mRNA	mmu-miR-152-3p (miRNA-mRNA) ENSMUSG00000026782	false
2400	miRNA-mRNA	mmu-miR-152-3p (miRNA-mRNA) ENSMUSG00000024302	false
2401	miRNA-mRNA	mmu-miR-152-3p (miRNA-mRNA) ENSMUSG00000025582	false
2402	miRNA-mRNA	mmu-miR-152-3p (miRNA-mRNA) ENSMUSG00000025810	false
2403	miRNA-mRNA	mmu-miR-152-3p (miRNA-mRNA) ENSMUSG00000023009	false
2404	miRNA-mRNA	mmu-miR-152-3p (miRNA-mRNA) ENSMUSG00000022231	false
2405	miRNA-mRNA	mmu-miR-152-3p (miRNA-mRNA) ENSMUSG00000021952	false
2406	miRNA-mRNA	mmu-miR-152-3p (miRNA-mRNA) ENSMUSG00000021453	false
2407	miRNA-mRNA	mmu-miR-152-3p (miRNA-mRNA) ENSMUSG00000022528	false
2408	miRNA-mRNA	mmu-miR-152-3p (miRNA-mRNA) ENSMUSG00000015745	false
2409	miRNA-mRNA	mmu-miR-152-3p (miRNA-mRNA) ENSMUSG00000014905	false
2410	miRNA-mRNA	mmu-miR-152-3p (miRNA-mRNA) ENSMUSG00000020225	false
2411	miRNA-mRNA	mmu-miR-152-3p (miRNA-mRNA) ENSMUSG00000020101	false
2412	miRNA-mRNA	mmu-miR-152-3p (miRNA-mRNA) ENSMUSG00000002265	false
2413	miRNA-mRNA	mmu-miR-152-3p (miRNA-mRNA) ENSMUSG00000004038	false
2414	miRNA-mRNA	mmu-miR-152-3p (miRNA-mRNA) ENSMUSG00000002107	false
2415	miRNA-mRNA	mmu-miR-152-3p (miRNA-mRNA) ENSMUSG00000008734	false
2416	miRNA-mRNA	mmu-miR-152-3p (miRNA-mRNA) ENSMUSG00000009575	false
2417	miRNA-mRNA	mmu-miR-152-3p (miRNA-mRNA) ENSMUSG00000008575	false
2418	miRNA-mRNA	mmu-miR-152-3p (miRNA-mRNA) ENSMUSG00000003814	false
2419	miRNA-mRNA	mmu-miR-152-3p (miRNA-mRNA) ENSMUSG00000004099	false
2420	miRNA-mRNA	mmu-miR-152-3p (miRNA-mRNA) ENSMUSG00000003032	false
2421	miRNA-mRNA	mmu-miR-152-3p (miRNA-mRNA) ENSMUSG00000000555	false
2422	miRNA-mRNA	mmu-miR-218-5p (miRNA-mRNA) ENSMUSG00000055485	false
2423	miRNA-mRNA	mmu-miR-218-5p (miRNA-mRNA) ENSMUSG00000058006	false
2424	miRNA-mRNA	mmu-miR-218-5p (miRNA-mRNA) ENSMUSG00000057315	false
2425	miRNA-mRNA	mmu-miR-218-5p (miRNA-mRNA) ENSMUSG00000067818	false
2426	miRNA-mRNA	mmu-miR-218-5p (miRNA-mRNA) ENSMUSG00000057406	false
2427	miRNA-mRNA	mmu-miR-218-5p (miRNA-mRNA) ENSMUSG00000055980	false
2428	miRNA-mRNA	mmu-miR-218-5p (miRNA-mRNA) ENSMUSG00000061455	false
2429	miRNA-mRNA	mmu-miR-218-5p (miRNA-mRNA) ENSMUSG00000064080	false
2430	miRNA-mRNA	mmu-miR-218-5p (miRNA-mRNA) ENSMUSG00000063160	false
2431	miRNA-mRNA	mmu-miR-218-5p (miRNA-mRNA) ENSMUSG00000055296	false
2432	miRNA-mRNA	mmu-miR-218-5p (miRNA-mRNA) ENSMUSG00000054555	false
2433	miRNA-mRNA	mmu-miR-218-5p (miRNA-mRNA) ENSMUSG00000066324	false
2434	miRNA-mRNA	mmu-miR-218-5p (miRNA-mRNA) ENSMUSG00000046743	false
2435	miRNA-mRNA	mmu-miR-218-5p (miRNA-mRNA) ENSMUSG00000053617	false
2436	miRNA-mRNA	mmu-miR-218-5p (miRNA-mRNA) ENSMUSG00000052331	false
2437	miRNA-mRNA	mmu-miR-218-5p (miRNA-mRNA) ENSMUSG00000046179	false
2438	miRNA-mRNA	mmu-miR-218-5p (miRNA-mRNA) ENSMUSG00000050064	false
2439	miRNA-mRNA	mmu-miR-218-5p (miRNA-mRNA) ENSMUSG00000047205	false
2440	miRNA-mRNA	mmu-miR-218-5p (miRNA-mRNA) ENSMUSG00000046668	false
2441	miRNA-mRNA	mmu-miR-218-5p (miRNA-mRNA) ENSMUSG00000045838	false
2442	miRNA-mRNA	mmu-miR-218-5p (miRNA-mRNA) ENSMUSG00000048911	false
2443	miRNA-mRNA	mmu-miR-218-5p (miRNA-mRNA) ENSMUSG00000053580	false
2444	miRNA-mRNA	mmu-miR-218-5p (miRNA-mRNA) ENSMUSG00000042686	false
2445	miRNA-mRNA	mmu-miR-218-5p (miRNA-mRNA) ENSMUSG00000041995	false
2446	miRNA-mRNA	mmu-miR-218-5p (miRNA-mRNA) ENSMUSG00000041688	false
2447	miRNA-mRNA	mmu-miR-218-5p (miRNA-mRNA) ENSMUSG00000040433	false
2448	miRNA-mRNA	mmu-miR-218-5p (miRNA-mRNA) ENSMUSG00000042675	false
2449	miRNA-mRNA	mmu-miR-218-5p (miRNA-mRNA) ENSMUSG00000039943	false
2450	miRNA-mRNA	mmu-miR-218-5p (miRNA-mRNA) ENSMUSG00000044646	false
2451	miRNA-mRNA	mmu-miR-218-5p (miRNA-mRNA) ENSMUSG00000043639	false
2452	miRNA-mRNA	mmu-miR-218-5p (miRNA-mRNA) ENSMUSG00000043154	false
2453	miRNA-mRNA	mmu-miR-218-5p (miRNA-mRNA) ENSMUSG00000045312	false
2454	miRNA-mRNA	mmu-miR-218-5p (miRNA-mRNA) ENSMUSG00000041741	false
2455	miRNA-mRNA	mmu-miR-218-5p (miRNA-mRNA) ENSMUSG00000041577	false
2456	miRNA-mRNA	mmu-miR-218-5p (miRNA-mRNA) ENSMUSG00000044066	false
2457	miRNA-mRNA	mmu-miR-218-5p (miRNA-mRNA) ENSMUSG00000042115	false
2458	miRNA-mRNA	mmu-miR-218-5p (miRNA-mRNA) ENSMUSG00000040990	false
2459	miRNA-mRNA	mmu-miR-218-5p (miRNA-mRNA) ENSMUSG00000043391	false
2460	miRNA-mRNA	mmu-miR-218-5p (miRNA-mRNA) ENSMUSG00000039384	false
2461	miRNA-mRNA	mmu-miR-218-5p (miRNA-mRNA) ENSMUSG00000038178	false
2462	miRNA-mRNA	mmu-miR-218-5p (miRNA-mRNA) ENSMUSG00000036745	false
2463	miRNA-mRNA	mmu-miR-218-5p (miRNA-mRNA) ENSMUSG00000037820	false
2464	miRNA-mRNA	mmu-miR-218-5p (miRNA-mRNA) ENSMUSG00000037235	false
2465	miRNA-mRNA	mmu-miR-218-5p (miRNA-mRNA) ENSMUSG00000039126	false
2466	miRNA-mRNA	mmu-miR-218-5p (miRNA-mRNA) ENSMUSG00000037035	false
2467	miRNA-mRNA	mmu-miR-218-5p (miRNA-mRNA) ENSMUSG00000036181	false
2468	miRNA-mRNA	mmu-miR-218-5p (miRNA-mRNA) ENSMUSG00000034591	false
2469	miRNA-mRNA	mmu-miR-218-5p (miRNA-mRNA) ENSMUSG00000036564	false
2470	miRNA-mRNA	mmu-miR-218-5p (miRNA-mRNA) ENSMUSG00000032625	false
2471	miRNA-mRNA	mmu-miR-218-5p (miRNA-mRNA) ENSMUSG00000033174	false
2472	miRNA-mRNA	mmu-miR-218-5p (miRNA-mRNA) ENSMUSG00000032640	false
2473	miRNA-mRNA	mmu-miR-218-5p (miRNA-mRNA) ENSMUSG00000035158	false
2474	miRNA-mRNA	mmu-miR-218-5p (miRNA-mRNA) ENSMUSG00000032035	false
2475	miRNA-mRNA	mmu-miR-218-5p (miRNA-mRNA) ENSMUSG00000031558	false
2476	miRNA-mRNA	mmu-miR-218-5p (miRNA-mRNA) ENSMUSG00000031903	false
2477	miRNA-mRNA	mmu-miR-218-5p (miRNA-mRNA) ENSMUSG00000031004	false
2478	miRNA-mRNA	mmu-miR-218-5p (miRNA-mRNA) ENSMUSG00000032557	false
2479	miRNA-mRNA	mmu-miR-218-5p (miRNA-mRNA) ENSMUSG00000030275	false
2480	miRNA-mRNA	mmu-miR-218-5p (miRNA-mRNA) ENSMUSG00000032507	false
2481	miRNA-mRNA	mmu-miR-218-5p (miRNA-mRNA) ENSMUSG00000031668	false
2482	miRNA-mRNA	mmu-miR-218-5p (miRNA-mRNA) ENSMUSG00000028763	false
2483	miRNA-mRNA	mmu-miR-218-5p (miRNA-mRNA) ENSMUSG00000027326	false
2484	miRNA-mRNA	mmu-miR-218-5p (miRNA-mRNA) ENSMUSG00000027699	false
2485	miRNA-mRNA	mmu-miR-218-5p (miRNA-mRNA) ENSMUSG00000026923	false
2486	miRNA-mRNA	mmu-miR-218-5p (miRNA-mRNA) ENSMUSG00000028927	false
2487	miRNA-mRNA	mmu-miR-218-5p (miRNA-mRNA) ENSMUSG00000027254	false
2488	miRNA-mRNA	mmu-miR-218-5p (miRNA-mRNA) ENSMUSG00000027878	false
2489	miRNA-mRNA	mmu-miR-218-5p (miRNA-mRNA) ENSMUSG00000027230	false
2490	miRNA-mRNA	mmu-miR-218-5p (miRNA-mRNA) ENSMUSG00000027808	false
2491	miRNA-mRNA	mmu-miR-218-5p (miRNA-mRNA) ENSMUSG00000028631	false
2492	miRNA-mRNA	mmu-miR-218-5p (miRNA-mRNA) ENSMUSG00000027220	false
2493	miRNA-mRNA	mmu-miR-218-5p (miRNA-mRNA) ENSMUSG00000026072	false
2494	miRNA-mRNA	mmu-miR-218-5p (miRNA-mRNA) ENSMUSG00000025085	false
2495	miRNA-mRNA	mmu-miR-218-5p (miRNA-mRNA) ENSMUSG00000025969	false
2496	miRNA-mRNA	mmu-miR-218-5p (miRNA-mRNA) ENSMUSG00000026605	false
2497	miRNA-mRNA	mmu-miR-218-5p (miRNA-mRNA) ENSMUSG00000024501	false
2498	miRNA-mRNA	mmu-miR-218-5p (miRNA-mRNA) ENSMUSG00000025810	false
2499	miRNA-mRNA	mmu-miR-218-5p (miRNA-mRNA) ENSMUSG00000024978	false
2500	miRNA-mRNA	mmu-miR-218-5p (miRNA-mRNA) ENSMUSG00000025265	false
2501	miRNA-mRNA	mmu-miR-218-5p (miRNA-mRNA) ENSMUSG00000026355	false
2502	miRNA-mRNA	mmu-miR-218-5p (miRNA-mRNA) ENSMUSG00000026797	false
2503	miRNA-mRNA	mmu-miR-218-5p (miRNA-mRNA) ENSMUSG00000024431	false
2504	miRNA-mRNA	mmu-miR-218-5p (miRNA-mRNA) ENSMUSG00000026782	false
2505	miRNA-mRNA	mmu-miR-218-5p (miRNA-mRNA) ENSMUSG00000025019	false
2506	miRNA-mRNA	mmu-miR-218-5p (miRNA-mRNA) ENSMUSG00000024989	false
2507	miRNA-mRNA	mmu-miR-218-5p (miRNA-mRNA) ENSMUSG00000024533	false
2508	miRNA-mRNA	mmu-miR-218-5p (miRNA-mRNA) ENSMUSG00000026657	false
2509	miRNA-mRNA	mmu-miR-218-5p (miRNA-mRNA) ENSMUSG00000024597	false
2510	miRNA-mRNA	mmu-miR-218-5p (miRNA-mRNA) ENSMUSG00000024304	false
2511	miRNA-mRNA	mmu-miR-218-5p (miRNA-mRNA) ENSMUSG00000025089	false
2512	miRNA-mRNA	mmu-miR-218-5p (miRNA-mRNA) ENSMUSG00000026223	false
2513	miRNA-mRNA	mmu-miR-218-5p (miRNA-mRNA) ENSMUSG00000022034	false
2514	miRNA-mRNA	mmu-miR-218-5p (miRNA-mRNA) ENSMUSG00000022346	false
2515	miRNA-mRNA	mmu-miR-218-5p (miRNA-mRNA) ENSMUSG00000022360	false
2516	miRNA-mRNA	mmu-miR-218-5p (miRNA-mRNA) ENSMUSG00000022136	false
2517	miRNA-mRNA	mmu-miR-218-5p (miRNA-mRNA) ENSMUSG00000021175	false
2518	miRNA-mRNA	mmu-miR-218-5p (miRNA-mRNA) ENSMUSG00000019564	false
2519	miRNA-mRNA	mmu-miR-218-5p (miRNA-mRNA) ENSMUSG00000019947	false
2520	miRNA-mRNA	mmu-miR-218-5p (miRNA-mRNA) ENSMUSG00000015745	false
2521	miRNA-mRNA	mmu-miR-218-5p (miRNA-mRNA) ENSMUSG00000020256	false
2522	miRNA-mRNA	mmu-miR-218-5p (miRNA-mRNA) ENSMUSG00000017499	false
2523	miRNA-mRNA	mmu-miR-218-5p (miRNA-mRNA) ENSMUSG00000019944	false
2524	miRNA-mRNA	mmu-miR-218-5p (miRNA-mRNA) ENSMUSG00000020019	false
2525	miRNA-mRNA	mmu-miR-218-5p (miRNA-mRNA) ENSMUSG00000016262	false
2526	miRNA-mRNA	mmu-miR-218-5p (miRNA-mRNA) ENSMUSG00000001525	false
2527	miRNA-mRNA	mmu-miR-218-5p (miRNA-mRNA) ENSMUSG00000009418	false
2528	miRNA-mRNA	mmu-miR-218-5p (miRNA-mRNA) ENSMUSG00000001105	false
2529	miRNA-mRNA	mmu-miR-218-5p (miRNA-mRNA) ENSMUSG00000006678	false
2530	miRNA-mRNA	mmu-miR-218-5p (miRNA-mRNA) ENSMUSG00000009575	false
2531	lincRNA-miRNA	ENSMUSG00000097101 (lincRNA-miRNA) mmu-miR-101c	false
2532	lincRNA-miRNA	ENSMUSG00000049881 (lincRNA-miRNA) mmu-miR-101a-3p	false
2533	miRNA-mRNA	mmu-miR-101a-3p (miRNA-mRNA) ENSMUSG00000089774	false
2534	miRNA-mRNA	mmu-miR-101a-3p (miRNA-mRNA) ENSMUSG00000069114	false
2535	miRNA-mRNA	mmu-miR-101a-3p (miRNA-mRNA) ENSMUSG00000067377	false
2536	miRNA-mRNA	mmu-miR-101a-3p (miRNA-mRNA) ENSMUSG00000060935	false
2537	miRNA-mRNA	mmu-miR-101a-3p (miRNA-mRNA) ENSMUSG00000068196	false
2538	miRNA-mRNA	mmu-miR-101a-3p (miRNA-mRNA) ENSMUSG00000062078	false
2539	miRNA-mRNA	mmu-miR-101a-3p (miRNA-mRNA) ENSMUSG00000059742	false
2540	miRNA-mRNA	mmu-miR-101a-3p (miRNA-mRNA) ENSMUSG00000053279	false
2541	miRNA-mRNA	mmu-miR-101a-3p (miRNA-mRNA) ENSMUSG00000057315	false
2542	miRNA-mRNA	mmu-miR-101a-3p (miRNA-mRNA) ENSMUSG00000052727	false
2543	miRNA-mRNA	mmu-miR-101a-3p (miRNA-mRNA) ENSMUSG00000055567	false
2544	miRNA-mRNA	mmu-miR-101a-3p (miRNA-mRNA) ENSMUSG00000053310	false
2545	miRNA-mRNA	mmu-miR-101a-3p (miRNA-mRNA) ENSMUSG00000056602	false
2546	miRNA-mRNA	mmu-miR-101a-3p (miRNA-mRNA) ENSMUSG00000058070	false
2547	miRNA-mRNA	mmu-miR-101a-3p (miRNA-mRNA) ENSMUSG00000055912	false
2548	miRNA-mRNA	mmu-miR-101a-3p (miRNA-mRNA) ENSMUSG00000053617	false
2549	miRNA-mRNA	mmu-miR-101a-3p (miRNA-mRNA) ENSMUSG00000057406	false
2550	miRNA-mRNA	mmu-miR-101a-3p (miRNA-mRNA) ENSMUSG00000058799	false
2551	miRNA-mRNA	mmu-miR-101a-3p (miRNA-mRNA) ENSMUSG00000053931	false
2552	miRNA-mRNA	mmu-miR-101a-3p (miRNA-mRNA) ENSMUSG00000058975	false
2553	miRNA-mRNA	mmu-miR-101a-3p (miRNA-mRNA) ENSMUSG00000053580	false
2554	miRNA-mRNA	mmu-miR-101a-3p (miRNA-mRNA) ENSMUSG00000048911	false
2555	miRNA-mRNA	mmu-miR-101a-3p (miRNA-mRNA) ENSMUSG00000051335	false
2556	miRNA-mRNA	mmu-miR-101a-3p (miRNA-mRNA) ENSMUSG00000048022	false
2557	miRNA-mRNA	mmu-miR-101a-3p (miRNA-mRNA) ENSMUSG00000052229	false
2558	miRNA-mRNA	mmu-miR-101a-3p (miRNA-mRNA) ENSMUSG00000049281	false
2559	miRNA-mRNA	mmu-miR-101a-3p (miRNA-mRNA) ENSMUSG00000050379	false
2560	miRNA-mRNA	mmu-miR-101a-3p (miRNA-mRNA) ENSMUSG00000051331	false
2561	miRNA-mRNA	mmu-miR-101a-3p (miRNA-mRNA) ENSMUSG00000048078	false
2562	miRNA-mRNA	mmu-miR-101a-3p (miRNA-mRNA) ENSMUSG00000049858	false
2563	miRNA-mRNA	mmu-miR-101a-3p (miRNA-mRNA) ENSMUSG00000049313	false
2564	miRNA-mRNA	mmu-miR-101a-3p (miRNA-mRNA) ENSMUSG00000050192	false
2565	miRNA-mRNA	mmu-miR-101a-3p (miRNA-mRNA) ENSMUSG00000049670	false
2566	miRNA-mRNA	mmu-miR-101a-3p (miRNA-mRNA) ENSMUSG00000048216	false
2567	miRNA-mRNA	mmu-miR-101a-3p (miRNA-mRNA) ENSMUSG00000047238	false
2568	miRNA-mRNA	mmu-miR-101a-3p (miRNA-mRNA) ENSMUSG00000044340	false
2569	miRNA-mRNA	mmu-miR-101a-3p (miRNA-mRNA) ENSMUSG00000046442	false
2570	miRNA-mRNA	mmu-miR-101a-3p (miRNA-mRNA) ENSMUSG00000046387	false
2571	miRNA-mRNA	mmu-miR-101a-3p (miRNA-mRNA) ENSMUSG00000045827	false
2572	miRNA-mRNA	mmu-miR-101a-3p (miRNA-mRNA) ENSMUSG00000043496	false
2573	miRNA-mRNA	mmu-miR-101a-3p (miRNA-mRNA) ENSMUSG00000046447	false
2574	miRNA-mRNA	mmu-miR-101a-3p (miRNA-mRNA) ENSMUSG00000044548	false
2575	miRNA-mRNA	mmu-miR-101a-3p (miRNA-mRNA) ENSMUSG00000044288	false
2576	miRNA-mRNA	mmu-miR-101a-3p (miRNA-mRNA) ENSMUSG00000043885	false
2577	miRNA-mRNA	mmu-miR-101a-3p (miRNA-mRNA) ENSMUSG00000046668	false
2578	miRNA-mRNA	mmu-miR-101a-3p (miRNA-mRNA) ENSMUSG00000046179	false
2579	miRNA-mRNA	mmu-miR-101a-3p (miRNA-mRNA) ENSMUSG00000046743	false
2580	miRNA-mRNA	mmu-miR-101a-3p (miRNA-mRNA) ENSMUSG00000044934	false
2581	miRNA-mRNA	mmu-miR-101a-3p (miRNA-mRNA) ENSMUSG00000044646	false
2582	miRNA-mRNA	mmu-miR-101a-3p (miRNA-mRNA) ENSMUSG00000044365	false
2583	miRNA-mRNA	mmu-miR-101a-3p (miRNA-mRNA) ENSMUSG00000045817	false
2584	miRNA-mRNA	mmu-miR-101a-3p (miRNA-mRNA) ENSMUSG00000042155	false
2585	miRNA-mRNA	mmu-miR-101a-3p (miRNA-mRNA) ENSMUSG00000041147	false
2586	miRNA-mRNA	mmu-miR-101a-3p (miRNA-mRNA) ENSMUSG00000041741	false
2587	miRNA-mRNA	mmu-miR-101a-3p (miRNA-mRNA) ENSMUSG00000042029	false
2588	miRNA-mRNA	mmu-miR-101a-3p (miRNA-mRNA) ENSMUSG00000040274	false
2589	miRNA-mRNA	mmu-miR-101a-3p (miRNA-mRNA) ENSMUSG00000042215	false
2590	miRNA-mRNA	mmu-miR-101a-3p (miRNA-mRNA) ENSMUSG00000042686	false
2591	miRNA-mRNA	mmu-miR-101a-3p (miRNA-mRNA) ENSMUSG00000040433	false
2592	miRNA-mRNA	mmu-miR-101a-3p (miRNA-mRNA) ENSMUSG00000040918	false
2593	miRNA-mRNA	mmu-miR-101a-3p (miRNA-mRNA) ENSMUSG00000038648	false
2594	miRNA-mRNA	mmu-miR-101a-3p (miRNA-mRNA) ENSMUSG00000040118	false
2595	miRNA-mRNA	mmu-miR-101a-3p (miRNA-mRNA) ENSMUSG00000038555	false
2596	miRNA-mRNA	mmu-miR-101a-3p (miRNA-mRNA) ENSMUSG00000039601	false
2597	miRNA-mRNA	mmu-miR-101a-3p (miRNA-mRNA) ENSMUSG00000040170	false
2598	miRNA-mRNA	mmu-miR-101a-3p (miRNA-mRNA) ENSMUSG00000039126	false
2599	miRNA-mRNA	mmu-miR-101a-3p (miRNA-mRNA) ENSMUSG00000039395	false
2600	miRNA-mRNA	mmu-miR-101a-3p (miRNA-mRNA) ENSMUSG00000040209	false
2601	miRNA-mRNA	mmu-miR-101a-3p (miRNA-mRNA) ENSMUSG00000040136	false
2602	miRNA-mRNA	mmu-miR-101a-3p (miRNA-mRNA) ENSMUSG00000039485	false
2603	miRNA-mRNA	mmu-miR-101a-3p (miRNA-mRNA) ENSMUSG00000039270	false
2604	miRNA-mRNA	mmu-miR-101a-3p (miRNA-mRNA) ENSMUSG00000038264	false
2605	miRNA-mRNA	mmu-miR-101a-3p (miRNA-mRNA) ENSMUSG00000037712	false
2606	miRNA-mRNA	mmu-miR-101a-3p (miRNA-mRNA) ENSMUSG00000037852	false
2607	miRNA-mRNA	mmu-miR-101a-3p (miRNA-mRNA) ENSMUSG00000036564	false
2608	miRNA-mRNA	mmu-miR-101a-3p (miRNA-mRNA) ENSMUSG00000037306	false
2609	miRNA-mRNA	mmu-miR-101a-3p (miRNA-mRNA) ENSMUSG00000038178	false
2610	miRNA-mRNA	mmu-miR-101a-3p (miRNA-mRNA) ENSMUSG00000036745	false
2611	miRNA-mRNA	mmu-miR-101a-3p (miRNA-mRNA) ENSMUSG00000038248	false
2612	miRNA-mRNA	mmu-miR-101a-3p (miRNA-mRNA) ENSMUSG00000037580	false
2613	miRNA-mRNA	mmu-miR-101a-3p (miRNA-mRNA) ENSMUSG00000036533	false
2614	miRNA-mRNA	mmu-miR-101a-3p (miRNA-mRNA) ENSMUSG00000038039	false
2615	miRNA-mRNA	mmu-miR-101a-3p (miRNA-mRNA) ENSMUSG00000034118	false
2616	miRNA-mRNA	mmu-miR-101a-3p (miRNA-mRNA) ENSMUSG00000034317	false
2617	miRNA-mRNA	mmu-miR-101a-3p (miRNA-mRNA) ENSMUSG00000033871	false
2618	miRNA-mRNA	mmu-miR-101a-3p (miRNA-mRNA) ENSMUSG00000035901	false
2619	miRNA-mRNA	mmu-miR-101a-3p (miRNA-mRNA) ENSMUSG00000036036	false
2620	miRNA-mRNA	mmu-miR-101a-3p (miRNA-mRNA) ENSMUSG00000034906	false
2621	miRNA-mRNA	mmu-miR-101a-3p (miRNA-mRNA) ENSMUSG00000034111	false
2622	miRNA-mRNA	mmu-miR-101a-3p (miRNA-mRNA) ENSMUSG00000035847	false
2623	miRNA-mRNA	mmu-miR-101a-3p (miRNA-mRNA) ENSMUSG00000034858	false
2624	miRNA-mRNA	mmu-miR-101a-3p (miRNA-mRNA) ENSMUSG00000035164	false
2625	miRNA-mRNA	mmu-miR-101a-3p (miRNA-mRNA) ENSMUSG00000035158	false
2626	miRNA-mRNA	mmu-miR-101a-3p (miRNA-mRNA) ENSMUSG00000034648	false
2627	miRNA-mRNA	mmu-miR-101a-3p (miRNA-mRNA) ENSMUSG00000031748	false
2628	miRNA-mRNA	mmu-miR-101a-3p (miRNA-mRNA) ENSMUSG00000032902	false
2629	miRNA-mRNA	mmu-miR-101a-3p (miRNA-mRNA) ENSMUSG00000032035	false
2630	miRNA-mRNA	mmu-miR-101a-3p (miRNA-mRNA) ENSMUSG00000033530	false
2631	miRNA-mRNA	mmu-miR-101a-3p (miRNA-mRNA) ENSMUSG00000031790	false
2632	miRNA-mRNA	mmu-miR-101a-3p (miRNA-mRNA) ENSMUSG00000033740	false
2633	miRNA-mRNA	mmu-miR-101a-3p (miRNA-mRNA) ENSMUSG00000032350	false
2634	miRNA-mRNA	mmu-miR-101a-3p (miRNA-mRNA) ENSMUSG00000032092	false
2635	miRNA-mRNA	mmu-miR-101a-3p (miRNA-mRNA) ENSMUSG00000030772	false
2636	miRNA-mRNA	mmu-miR-101a-3p (miRNA-mRNA) ENSMUSG00000031647	false
2637	miRNA-mRNA	mmu-miR-101a-3p (miRNA-mRNA) ENSMUSG00000031532	false
2638	miRNA-mRNA	mmu-miR-101a-3p (miRNA-mRNA) ENSMUSG00000031596	false
2639	miRNA-mRNA	mmu-miR-101a-3p (miRNA-mRNA) ENSMUSG00000031367	false
2640	miRNA-mRNA	mmu-miR-101a-3p (miRNA-mRNA) ENSMUSG00000030643	false
2641	miRNA-mRNA	mmu-miR-101a-3p (miRNA-mRNA) ENSMUSG00000031442	false
2642	miRNA-mRNA	mmu-miR-101a-3p (miRNA-mRNA) ENSMUSG00000031561	false
2643	miRNA-mRNA	mmu-miR-101a-3p (miRNA-mRNA) ENSMUSG00000031004	false
2644	miRNA-mRNA	mmu-miR-101a-3p (miRNA-mRNA) ENSMUSG00000030401	false
2645	miRNA-mRNA	mmu-miR-101a-3p (miRNA-mRNA) ENSMUSG00000030671	false
2646	miRNA-mRNA	mmu-miR-101a-3p (miRNA-mRNA) ENSMUSG00000030275	false
2647	miRNA-mRNA	mmu-miR-101a-3p (miRNA-mRNA) ENSMUSG00000030978	false
2648	miRNA-mRNA	mmu-miR-101a-3p (miRNA-mRNA) ENSMUSG00000031202	false
2649	miRNA-mRNA	mmu-miR-101a-3p (miRNA-mRNA) ENSMUSG00000029716	false
2650	miRNA-mRNA	mmu-miR-101a-3p (miRNA-mRNA) ENSMUSG00000029033	false
2651	miRNA-mRNA	mmu-miR-101a-3p (miRNA-mRNA) ENSMUSG00000030087	false
2652	miRNA-mRNA	mmu-miR-101a-3p (miRNA-mRNA) ENSMUSG00000029570	false
2653	miRNA-mRNA	mmu-miR-101a-3p (miRNA-mRNA) ENSMUSG00000029096	false
2654	miRNA-mRNA	mmu-miR-101a-3p (miRNA-mRNA) ENSMUSG00000028926	false
2655	miRNA-mRNA	mmu-miR-101a-3p (miRNA-mRNA) ENSMUSG00000028312	false
2656	miRNA-mRNA	mmu-miR-101a-3p (miRNA-mRNA) ENSMUSG00000027435	false
2657	miRNA-mRNA	mmu-miR-101a-3p (miRNA-mRNA) ENSMUSG00000028289	false
2658	miRNA-mRNA	mmu-miR-101a-3p (miRNA-mRNA) ENSMUSG00000027699	false
2659	miRNA-mRNA	mmu-miR-101a-3p (miRNA-mRNA) ENSMUSG00000028496	false
2660	miRNA-mRNA	mmu-miR-101a-3p (miRNA-mRNA) ENSMUSG00000027834	false
2661	miRNA-mRNA	mmu-miR-101a-3p (miRNA-mRNA) ENSMUSG00000027641	false
2662	miRNA-mRNA	mmu-miR-101a-3p (miRNA-mRNA) ENSMUSG00000028463	false
2663	miRNA-mRNA	mmu-miR-101a-3p (miRNA-mRNA) ENSMUSG00000027381	false
2664	miRNA-mRNA	mmu-miR-101a-3p (miRNA-mRNA) ENSMUSG00000027763	false
2665	miRNA-mRNA	mmu-miR-101a-3p (miRNA-mRNA) ENSMUSG00000028634	false
2666	miRNA-mRNA	mmu-miR-101a-3p (miRNA-mRNA) ENSMUSG00000028403	false
2667	miRNA-mRNA	mmu-miR-101a-3p (miRNA-mRNA) ENSMUSG00000027346	false
2668	miRNA-mRNA	mmu-miR-101a-3p (miRNA-mRNA) ENSMUSG00000027254	false
2669	miRNA-mRNA	mmu-miR-101a-3p (miRNA-mRNA) ENSMUSG00000026833	false
2670	miRNA-mRNA	mmu-miR-101a-3p (miRNA-mRNA) ENSMUSG00000027074	false
2671	miRNA-mRNA	mmu-miR-101a-3p (miRNA-mRNA) ENSMUSG00000026430	false
2672	miRNA-mRNA	mmu-miR-101a-3p (miRNA-mRNA) ENSMUSG00000026489	false
2673	miRNA-mRNA	mmu-miR-101a-3p (miRNA-mRNA) ENSMUSG00000027248	false
2674	miRNA-mRNA	mmu-miR-101a-3p (miRNA-mRNA) ENSMUSG00000026473	false
2675	miRNA-mRNA	mmu-miR-101a-3p (miRNA-mRNA) ENSMUSG00000026380	false
2676	miRNA-mRNA	mmu-miR-101a-3p (miRNA-mRNA) ENSMUSG00000027220	false
2677	miRNA-mRNA	mmu-miR-101a-3p (miRNA-mRNA) ENSMUSG00000027006	false
2678	miRNA-mRNA	mmu-miR-101a-3p (miRNA-mRNA) ENSMUSG00000026737	false
2679	miRNA-mRNA	mmu-miR-101a-3p (miRNA-mRNA) ENSMUSG00000026657	false
2680	miRNA-mRNA	mmu-miR-101a-3p (miRNA-mRNA) ENSMUSG00000026442	false
2681	miRNA-mRNA	mmu-miR-101a-3p (miRNA-mRNA) ENSMUSG00000026558	false
2682	miRNA-mRNA	mmu-miR-101a-3p (miRNA-mRNA) ENSMUSG00000026509	false
2683	miRNA-mRNA	mmu-miR-101a-3p (miRNA-mRNA) ENSMUSG00000026782	false
2684	miRNA-mRNA	mmu-miR-101a-3p (miRNA-mRNA) ENSMUSG00000026620	false
2685	miRNA-mRNA	mmu-miR-101a-3p (miRNA-mRNA) ENSMUSG00000024691	false
2686	miRNA-mRNA	mmu-miR-101a-3p (miRNA-mRNA) ENSMUSG00000026360	false
2687	miRNA-mRNA	mmu-miR-101a-3p (miRNA-mRNA) ENSMUSG00000025019	false
2688	miRNA-mRNA	mmu-miR-101a-3p (miRNA-mRNA) ENSMUSG00000026335	false
2689	miRNA-mRNA	mmu-miR-101a-3p (miRNA-mRNA) ENSMUSG00000025001	false
2690	miRNA-mRNA	mmu-miR-101a-3p (miRNA-mRNA) ENSMUSG00000026223	false
2691	miRNA-mRNA	mmu-miR-101a-3p (miRNA-mRNA) ENSMUSG00000026131	false
2692	miRNA-mRNA	mmu-miR-101a-3p (miRNA-mRNA) ENSMUSG00000025969	false
2693	miRNA-mRNA	mmu-miR-101a-3p (miRNA-mRNA) ENSMUSG00000025154	false
2694	miRNA-mRNA	mmu-miR-101a-3p (miRNA-mRNA) ENSMUSG00000025810	false
2695	miRNA-mRNA	mmu-miR-101a-3p (miRNA-mRNA) ENSMUSG00000025582	false
2696	miRNA-mRNA	mmu-miR-101a-3p (miRNA-mRNA) ENSMUSG00000024597	false
2697	miRNA-mRNA	mmu-miR-101a-3p (miRNA-mRNA) ENSMUSG00000023017	false
2698	miRNA-mRNA	mmu-miR-101a-3p (miRNA-mRNA) ENSMUSG00000024302	false
2699	miRNA-mRNA	mmu-miR-101a-3p (miRNA-mRNA) ENSMUSG00000024533	false
2700	miRNA-mRNA	mmu-miR-101a-3p (miRNA-mRNA) ENSMUSG00000024548	false
2701	miRNA-mRNA	mmu-miR-101a-3p (miRNA-mRNA) ENSMUSG00000024299	false
2702	miRNA-mRNA	mmu-miR-101a-3p (miRNA-mRNA) ENSMUSG00000024411	false
2703	miRNA-mRNA	mmu-miR-101a-3p (miRNA-mRNA) ENSMUSG00000023827	false
2704	miRNA-mRNA	mmu-miR-101a-3p (miRNA-mRNA) ENSMUSG00000023092	false
2705	miRNA-mRNA	mmu-miR-101a-3p (miRNA-mRNA) ENSMUSG00000024511	false
2706	miRNA-mRNA	mmu-miR-101a-3p (miRNA-mRNA) ENSMUSG00000022840	false
2707	miRNA-mRNA	mmu-miR-101a-3p (miRNA-mRNA) ENSMUSG00000024431	false
2708	miRNA-mRNA	mmu-miR-101a-3p (miRNA-mRNA) ENSMUSG00000022369	false
2709	miRNA-mRNA	mmu-miR-101a-3p (miRNA-mRNA) ENSMUSG00000021730	false
2710	miRNA-mRNA	mmu-miR-101a-3p (miRNA-mRNA) ENSMUSG00000022136	false
2711	miRNA-mRNA	mmu-miR-101a-3p (miRNA-mRNA) ENSMUSG00000022332	false
2712	miRNA-mRNA	mmu-miR-101a-3p (miRNA-mRNA) ENSMUSG00000021831	false
2713	miRNA-mRNA	mmu-miR-101a-3p (miRNA-mRNA) ENSMUSG00000022505	false
2714	miRNA-mRNA	mmu-miR-101a-3p (miRNA-mRNA) ENSMUSG00000021700	false
2715	miRNA-mRNA	mmu-miR-101a-3p (miRNA-mRNA) ENSMUSG00000020576	false
2716	miRNA-mRNA	mmu-miR-101a-3p (miRNA-mRNA) ENSMUSG00000020472	false
2717	miRNA-mRNA	mmu-miR-101a-3p (miRNA-mRNA) ENSMUSG00000021266	false
2718	miRNA-mRNA	mmu-miR-101a-3p (miRNA-mRNA) ENSMUSG00000021175	false
2719	miRNA-mRNA	mmu-miR-101a-3p (miRNA-mRNA) ENSMUSG00000020431	false
2720	miRNA-mRNA	mmu-miR-101a-3p (miRNA-mRNA) ENSMUSG00000020577	false
2721	miRNA-mRNA	mmu-miR-101a-3p (miRNA-mRNA) ENSMUSG00000020848	false
2722	miRNA-mRNA	mmu-miR-101a-3p (miRNA-mRNA) ENSMUSG00000021062	false
2723	miRNA-mRNA	mmu-miR-101a-3p (miRNA-mRNA) ENSMUSG00000020423	false
2724	miRNA-mRNA	mmu-miR-101a-3p (miRNA-mRNA) ENSMUSG00000021379	false
2725	miRNA-mRNA	mmu-miR-101a-3p (miRNA-mRNA) ENSMUSG00000020493	false
2726	miRNA-mRNA	mmu-miR-101a-3p (miRNA-mRNA) ENSMUSG00000017639	false
2727	miRNA-mRNA	mmu-miR-101a-3p (miRNA-mRNA) ENSMUSG00000020032	false
2728	miRNA-mRNA	mmu-miR-101a-3p (miRNA-mRNA) ENSMUSG00000019124	false
2729	miRNA-mRNA	mmu-miR-101a-3p (miRNA-mRNA) ENSMUSG00000019947	false
2730	miRNA-mRNA	mmu-miR-101a-3p (miRNA-mRNA) ENSMUSG00000020044	false
2731	miRNA-mRNA	mmu-miR-101a-3p (miRNA-mRNA) ENSMUSG00000018698	false
2732	miRNA-mRNA	mmu-miR-101a-3p (miRNA-mRNA) ENSMUSG00000009394	false
2733	miRNA-mRNA	mmu-miR-101a-3p (miRNA-mRNA) ENSMUSG00000015222	false
2734	miRNA-mRNA	mmu-miR-101a-3p (miRNA-mRNA) ENSMUSG00000015837	false
2735	miRNA-mRNA	mmu-miR-101a-3p (miRNA-mRNA) ENSMUSG00000006678	false
2736	miRNA-mRNA	mmu-miR-101a-3p (miRNA-mRNA) ENSMUSG00000006273	false
2737	miRNA-mRNA	mmu-miR-101a-3p (miRNA-mRNA) ENSMUSG00000014602	false
2738	miRNA-mRNA	mmu-miR-101a-3p (miRNA-mRNA) ENSMUSG00000008734	false
2739	miRNA-mRNA	mmu-miR-101a-3p (miRNA-mRNA) ENSMUSG00000011256	false
2740	miRNA-mRNA	mmu-miR-101a-3p (miRNA-mRNA) ENSMUSG00000007379	false
2741	miRNA-mRNA	mmu-miR-101a-3p (miRNA-mRNA) ENSMUSG00000010505	false
2742	miRNA-mRNA	mmu-miR-101a-3p (miRNA-mRNA) ENSMUSG00000010803	false
2743	miRNA-mRNA	mmu-miR-101a-3p (miRNA-mRNA) ENSMUSG00000008398	false
2744	miRNA-mRNA	mmu-miR-101a-3p (miRNA-mRNA) ENSMUSG00000008575	false
2745	miRNA-mRNA	mmu-miR-101a-3p (miRNA-mRNA) ENSMUSG00000010175	false
2746	miRNA-mRNA	mmu-miR-101a-3p (miRNA-mRNA) ENSMUSG00000014813	false
2747	miRNA-mRNA	mmu-miR-101a-3p (miRNA-mRNA) ENSMUSG00000000782	false
2748	miRNA-mRNA	mmu-miR-101a-3p (miRNA-mRNA) ENSMUSG00000003469	false
2749	miRNA-mRNA	mmu-miR-101a-3p (miRNA-mRNA) ENSMUSG00000002107	false
2750	miRNA-mRNA	mmu-miR-101a-3p (miRNA-mRNA) ENSMUSG00000005410	false
2751	miRNA-mRNA	mmu-miR-101a-3p (miRNA-mRNA) ENSMUSG00000001517	false
2752	miRNA-mRNA	mmu-miR-101a-3p (miRNA-mRNA) ENSMUSG00000003992	false
2753	miRNA-mRNA	mmu-miR-101a-3p (miRNA-mRNA) ENSMUSG00000000416	false
2754	miRNA-mRNA	mmu-let-7e-5p (miRNA-mRNA) ENSMUSG00000057335	false
2755	miRNA-mRNA	mmu-let-7e-5p (miRNA-mRNA) ENSMUSG00000056050	false
2756	miRNA-mRNA	mmu-let-7e-5p (miRNA-mRNA) ENSMUSG00000056394	false
2757	miRNA-mRNA	mmu-let-7e-5p (miRNA-mRNA) ENSMUSG00000056724	false
2758	miRNA-mRNA	mmu-let-7e-5p (miRNA-mRNA) ENSMUSG00000057406	false
2759	miRNA-mRNA	mmu-let-7e-5p (miRNA-mRNA) ENSMUSG00000078234	false
2760	miRNA-mRNA	mmu-let-7e-5p (miRNA-mRNA) ENSMUSG00000062410	false
2761	miRNA-mRNA	mmu-let-7e-5p (miRNA-mRNA) ENSMUSG00000072082	false
2762	miRNA-mRNA	mmu-let-7e-5p (miRNA-mRNA) ENSMUSG00000066152	false
2763	miRNA-mRNA	mmu-let-7e-5p (miRNA-mRNA) ENSMUSG00000058392	false
2764	miRNA-mRNA	mmu-let-7e-5p (miRNA-mRNA) ENSMUSG00000046668	false
2765	miRNA-mRNA	mmu-let-7e-5p (miRNA-mRNA) ENSMUSG00000049858	false
2766	miRNA-mRNA	mmu-let-7e-5p (miRNA-mRNA) ENSMUSG00000046070	false
2767	miRNA-mRNA	mmu-let-7e-5p (miRNA-mRNA) ENSMUSG00000051166	false
2768	miRNA-mRNA	mmu-let-7e-5p (miRNA-mRNA) ENSMUSG00000053617	false
2769	miRNA-mRNA	mmu-let-7e-5p (miRNA-mRNA) ENSMUSG00000052331	false
2770	miRNA-mRNA	mmu-let-7e-5p (miRNA-mRNA) ENSMUSG00000052384	false
2771	miRNA-mRNA	mmu-let-7e-5p (miRNA-mRNA) ENSMUSG00000044468	false
2772	miRNA-mRNA	mmu-let-7e-5p (miRNA-mRNA) ENSMUSG00000052085	false
2773	miRNA-mRNA	mmu-let-7e-5p (miRNA-mRNA) ENSMUSG00000051043	false
2774	miRNA-mRNA	mmu-let-7e-5p (miRNA-mRNA) ENSMUSG00000048012	false
2775	miRNA-mRNA	mmu-let-7e-5p (miRNA-mRNA) ENSMUSG00000047749	false
2776	miRNA-mRNA	mmu-let-7e-5p (miRNA-mRNA) ENSMUSG00000042312	false
2777	miRNA-mRNA	mmu-let-7e-5p (miRNA-mRNA) ENSMUSG00000039168	false
2778	miRNA-mRNA	mmu-let-7e-5p (miRNA-mRNA) ENSMUSG00000039748	false
2779	miRNA-mRNA	mmu-let-7e-5p (miRNA-mRNA) ENSMUSG00000038943	false
2780	miRNA-mRNA	mmu-let-7e-5p (miRNA-mRNA) ENSMUSG00000041995	false
2781	miRNA-mRNA	mmu-let-7e-5p (miRNA-mRNA) ENSMUSG00000039158	false
2782	miRNA-mRNA	mmu-let-7e-5p (miRNA-mRNA) ENSMUSG00000040699	false
2783	miRNA-mRNA	mmu-let-7e-5p (miRNA-mRNA) ENSMUSG00000040462	false
2784	miRNA-mRNA	mmu-let-7e-5p (miRNA-mRNA) ENSMUSG00000041498	false
2785	miRNA-mRNA	mmu-let-7e-5p (miRNA-mRNA) ENSMUSG00000040195	false
2786	miRNA-mRNA	mmu-let-7e-5p (miRNA-mRNA) ENSMUSG00000038507	false
2787	miRNA-mRNA	mmu-let-7e-5p (miRNA-mRNA) ENSMUSG00000038530	false
2788	miRNA-mRNA	mmu-let-7e-5p (miRNA-mRNA) ENSMUSG00000038178	false
2789	miRNA-mRNA	mmu-let-7e-5p (miRNA-mRNA) ENSMUSG00000038224	false
2790	miRNA-mRNA	mmu-let-7e-5p (miRNA-mRNA) ENSMUSG00000037235	false
2791	miRNA-mRNA	mmu-let-7e-5p (miRNA-mRNA) ENSMUSG00000035864	false
2792	miRNA-mRNA	mmu-let-7e-5p (miRNA-mRNA) ENSMUSG00000031570	false
2793	miRNA-mRNA	mmu-let-7e-5p (miRNA-mRNA) ENSMUSG00000032409	false
2794	miRNA-mRNA	mmu-let-7e-5p (miRNA-mRNA) ENSMUSG00000034349	false
2795	miRNA-mRNA	mmu-let-7e-5p (miRNA-mRNA) ENSMUSG00000032420	false
2796	miRNA-mRNA	mmu-let-7e-5p (miRNA-mRNA) ENSMUSG00000034591	false
2797	miRNA-mRNA	mmu-let-7e-5p (miRNA-mRNA) ENSMUSG00000033411	false
2798	miRNA-mRNA	mmu-let-7e-5p (miRNA-mRNA) ENSMUSG00000031903	false
2799	miRNA-mRNA	mmu-let-7e-5p (miRNA-mRNA) ENSMUSG00000034614	false
2800	miRNA-mRNA	mmu-let-7e-5p (miRNA-mRNA) ENSMUSG00000031844	false
2801	miRNA-mRNA	mmu-let-7e-5p (miRNA-mRNA) ENSMUSG00000030737	false
2802	miRNA-mRNA	mmu-let-7e-5p (miRNA-mRNA) ENSMUSG00000028527	false
2803	miRNA-mRNA	mmu-let-7e-5p (miRNA-mRNA) ENSMUSG00000030867	false
2804	miRNA-mRNA	mmu-let-7e-5p (miRNA-mRNA) ENSMUSG00000030830	false
2805	miRNA-mRNA	mmu-let-7e-5p (miRNA-mRNA) ENSMUSG00000028403	false
2806	miRNA-mRNA	mmu-let-7e-5p (miRNA-mRNA) ENSMUSG00000030275	false
2807	miRNA-mRNA	mmu-let-7e-5p (miRNA-mRNA) ENSMUSG00000028212	false
2808	miRNA-mRNA	mmu-let-7e-5p (miRNA-mRNA) ENSMUSG00000029408	false
2809	miRNA-mRNA	mmu-let-7e-5p (miRNA-mRNA) ENSMUSG00000027346	false
2810	miRNA-mRNA	mmu-let-7e-5p (miRNA-mRNA) ENSMUSG00000026398	false
2811	miRNA-mRNA	mmu-let-7e-5p (miRNA-mRNA) ENSMUSG00000028076	false
2812	miRNA-mRNA	mmu-let-7e-5p (miRNA-mRNA) ENSMUSG00000027878	false
2813	miRNA-mRNA	mmu-let-7e-5p (miRNA-mRNA) ENSMUSG00000027715	false
2814	miRNA-mRNA	mmu-let-7e-5p (miRNA-mRNA) ENSMUSG00000027381	false
2815	miRNA-mRNA	mmu-let-7e-5p (miRNA-mRNA) ENSMUSG00000026223	false
2816	miRNA-mRNA	mmu-let-7e-5p (miRNA-mRNA) ENSMUSG00000025271	false
2817	miRNA-mRNA	mmu-let-7e-5p (miRNA-mRNA) ENSMUSG00000026131	false
2818	miRNA-mRNA	mmu-let-7e-5p (miRNA-mRNA) ENSMUSG00000026475	false
2819	miRNA-mRNA	mmu-let-7e-5p (miRNA-mRNA) ENSMUSG00000025969	false
2820	miRNA-mRNA	mmu-let-7e-5p (miRNA-mRNA) ENSMUSG00000024590	false
2821	miRNA-mRNA	mmu-let-7e-5p (miRNA-mRNA) ENSMUSG00000022346	false
2822	miRNA-mRNA	mmu-let-7e-5p (miRNA-mRNA) ENSMUSG00000021952	false
2823	miRNA-mRNA	mmu-let-7e-5p (miRNA-mRNA) ENSMUSG00000024807	false
2824	miRNA-mRNA	mmu-let-7e-5p (miRNA-mRNA) ENSMUSG00000024989	false
2825	miRNA-mRNA	mmu-let-7e-5p (miRNA-mRNA) ENSMUSG00000021559	false
2826	miRNA-mRNA	mmu-let-7e-5p (miRNA-mRNA) ENSMUSG00000024063	false
2827	miRNA-mRNA	mmu-let-7e-5p (miRNA-mRNA) ENSMUSG00000021569	false
2828	miRNA-mRNA	mmu-let-7e-5p (miRNA-mRNA) ENSMUSG00000022358	false
2829	miRNA-mRNA	mmu-let-7e-5p (miRNA-mRNA) ENSMUSG00000020941	false
2830	miRNA-mRNA	mmu-let-7e-5p (miRNA-mRNA) ENSMUSG00000021364	false
2831	miRNA-mRNA	mmu-let-7e-5p (miRNA-mRNA) ENSMUSG00000019188	false
2832	miRNA-mRNA	mmu-let-7e-5p (miRNA-mRNA) ENSMUSG00000019944	false
2833	miRNA-mRNA	mmu-let-7e-5p (miRNA-mRNA) ENSMUSG00000020423	false
2834	miRNA-mRNA	mmu-let-7e-5p (miRNA-mRNA) ENSMUSG00000019564	false
2835	miRNA-mRNA	mmu-let-7e-5p (miRNA-mRNA) ENSMUSG00000009378	false
2836	miRNA-mRNA	mmu-let-7e-5p (miRNA-mRNA) ENSMUSG00000002107	false
2837	miRNA-mRNA	mmu-let-7e-5p (miRNA-mRNA) ENSMUSG00000012443	false
2838	miRNA-mRNA	mmu-let-7e-5p (miRNA-mRNA) ENSMUSG00000014905	false
2839	miRNA-mRNA	mmu-let-7e-5p (miRNA-mRNA) ENSMUSG00000009575	false
2840	miRNA-mRNA	mmu-let-7e-5p (miRNA-mRNA) ENSMUSG00000015745	false
2841	miRNA-mRNA	mmu-miR-130a-3p (miRNA-mRNA) ENSMUSG00000053460	false
2842	miRNA-mRNA	mmu-miR-130a-3p (miRNA-mRNA) ENSMUSG00000033684	false
2843	miRNA-mRNA	mmu-miR-130a-3p (miRNA-mRNA) ENSMUSG00000064215	false
2844	miRNA-mRNA	mmu-miR-130a-3p (miRNA-mRNA) ENSMUSG00000030087	false
2845	miRNA-mRNA	mmu-miR-130a-3p (miRNA-mRNA) ENSMUSG00000034349	false
2846	miRNA-mRNA	mmu-miR-130a-3p (miRNA-mRNA) ENSMUSG00000038793	false
2847	miRNA-mRNA	mmu-miR-130a-3p (miRNA-mRNA) ENSMUSG00000044934	false
2848	miRNA-mRNA	mmu-miR-130a-3p (miRNA-mRNA) ENSMUSG00000019302	false
2849	miRNA-mRNA	mmu-miR-130a-3p (miRNA-mRNA) ENSMUSG00000005672	false
2850	miRNA-mRNA	mmu-miR-130a-3p (miRNA-mRNA) ENSMUSG00000018899	false
2851	miRNA-mRNA	mmu-miR-130a-3p (miRNA-mRNA) ENSMUSG00000027605	false
2852	miRNA-mRNA	mmu-miR-130a-3p (miRNA-mRNA) ENSMUSG00000020225	false
2853	miRNA-mRNA	mmu-miR-130a-3p (miRNA-mRNA) ENSMUSG00000026131	false
2854	miRNA-mRNA	mmu-miR-130a-3p (miRNA-mRNA) ENSMUSG00000017009	false
2855	miRNA-mRNA	mmu-miR-130a-3p (miRNA-mRNA) ENSMUSG00000006678	false
2856	miRNA-mRNA	mmu-miR-130a-3p (miRNA-mRNA) ENSMUSG00000006273	false
2857	miRNA-mRNA	mmu-miR-130a-3p (miRNA-mRNA) ENSMUSG00000003545	false
2858	miRNA-mRNA	mmu-miR-130a-3p (miRNA-mRNA) ENSMUSG00000027381	false
2859	miRNA-mRNA	mmu-miR-210-3p (miRNA-mRNA) ENSMUSG00000040433	false
2860	miRNA-mRNA	mmu-miR-210-3p (miRNA-mRNA) ENSMUSG00000041741	false
2861	miRNA-mRNA	mmu-miR-210-3p (miRNA-mRNA) ENSMUSG00000049807	false
2862	miRNA-mRNA	mmu-miR-210-3p (miRNA-mRNA) ENSMUSG00000050064	false
2863	miRNA-mRNA	mmu-miR-210-3p (miRNA-mRNA) ENSMUSG00000055296	false
2864	miRNA-mRNA	mmu-miR-210-3p (miRNA-mRNA) ENSMUSG00000040852	false
2865	miRNA-mRNA	mmu-miR-210-3p (miRNA-mRNA) ENSMUSG00000040181	false
2866	miRNA-mRNA	mmu-miR-210-3p (miRNA-mRNA) ENSMUSG00000052331	false
2867	miRNA-mRNA	mmu-miR-210-3p (miRNA-mRNA) ENSMUSG00000054555	false
2868	miRNA-mRNA	mmu-miR-210-3p (miRNA-mRNA) ENSMUSG00000037822	false
2869	miRNA-mRNA	mmu-miR-210-3p (miRNA-mRNA) ENSMUSG00000035357	false
2870	miRNA-mRNA	mmu-miR-210-3p (miRNA-mRNA) ENSMUSG00000031557	false
2871	miRNA-mRNA	mmu-miR-210-3p (miRNA-mRNA) ENSMUSG00000034349	false
2872	miRNA-mRNA	mmu-miR-210-3p (miRNA-mRNA) ENSMUSG00000038175	false
2873	miRNA-mRNA	mmu-miR-210-3p (miRNA-mRNA) ENSMUSG00000032238	false
2874	miRNA-mRNA	mmu-miR-210-3p (miRNA-mRNA) ENSMUSG00000024777	false
2875	miRNA-mRNA	mmu-miR-210-3p (miRNA-mRNA) ENSMUSG00000028403	false
2876	miRNA-mRNA	mmu-miR-210-3p (miRNA-mRNA) ENSMUSG00000027808	false
2877	miRNA-mRNA	mmu-miR-210-3p (miRNA-mRNA) ENSMUSG00000028076	false
2878	miRNA-mRNA	mmu-miR-210-3p (miRNA-mRNA) ENSMUSG00000024304	false
2879	miRNA-mRNA	mmu-miR-210-3p (miRNA-mRNA) ENSMUSG00000025867	false
2880	miRNA-mRNA	mmu-miR-210-3p (miRNA-mRNA) ENSMUSG00000028718	false
2881	miRNA-mRNA	mmu-miR-210-3p (miRNA-mRNA) ENSMUSG00000028693	false
2882	miRNA-mRNA	mmu-miR-210-3p (miRNA-mRNA) ENSMUSG00000028631	false
2883	miRNA-mRNA	mmu-miR-210-3p (miRNA-mRNA) ENSMUSG00000024533	false
2884	miRNA-mRNA	mmu-miR-210-3p (miRNA-mRNA) ENSMUSG00000027763	false
2885	miRNA-mRNA	mmu-miR-210-3p (miRNA-mRNA) ENSMUSG00000028634	false
2886	miRNA-mRNA	mmu-miR-210-3p (miRNA-mRNA) ENSMUSG00000020886	false
2887	miRNA-mRNA	mmu-miR-210-3p (miRNA-mRNA) ENSMUSG00000008575	false
2888	miRNA-mRNA	mmu-miR-210-3p (miRNA-mRNA) ENSMUSG00000020256	false
2889	miRNA-mRNA	mmu-miR-210-3p (miRNA-mRNA) ENSMUSG00000020261	false
2890	miRNA-mRNA	mmu-miR-210-3p (miRNA-mRNA) ENSMUSG00000002265	false
2891	miRNA-mRNA	mmu-miR-677-5p (miRNA-mRNA) ENSMUSG00000062078	false
2892	miRNA-mRNA	mmu-miR-677-5p (miRNA-mRNA) ENSMUSG00000066324	false
2893	miRNA-mRNA	mmu-miR-677-5p (miRNA-mRNA) ENSMUSG00000072812	false
2894	miRNA-mRNA	mmu-miR-677-5p (miRNA-mRNA) ENSMUSG00000057406	false
2895	miRNA-mRNA	mmu-miR-677-5p (miRNA-mRNA) ENSMUSG00000056050	false
2896	miRNA-mRNA	mmu-miR-677-5p (miRNA-mRNA) ENSMUSG00000070733	false
2897	miRNA-mRNA	mmu-miR-677-5p (miRNA-mRNA) ENSMUSG00000071984	false
2898	miRNA-mRNA	mmu-miR-677-5p (miRNA-mRNA) ENSMUSG00000059708	false
2899	miRNA-mRNA	mmu-miR-677-5p (miRNA-mRNA) ENSMUSG00000058297	false
2900	miRNA-mRNA	mmu-miR-677-5p (miRNA-mRNA) ENSMUSG00000060935	false
2901	miRNA-mRNA	mmu-miR-677-5p (miRNA-mRNA) ENSMUSG00000048482	false
2902	miRNA-mRNA	mmu-miR-677-5p (miRNA-mRNA) ENSMUSG00000049047	false
2903	miRNA-mRNA	mmu-miR-677-5p (miRNA-mRNA) ENSMUSG00000047250	false
2904	miRNA-mRNA	mmu-miR-677-5p (miRNA-mRNA) ENSMUSG00000047963	false
2905	miRNA-mRNA	mmu-miR-677-5p (miRNA-mRNA) ENSMUSG00000048970	false
2906	miRNA-mRNA	mmu-miR-677-5p (miRNA-mRNA) ENSMUSG00000047044	false
2907	miRNA-mRNA	mmu-miR-677-5p (miRNA-mRNA) ENSMUSG00000053617	false
2908	miRNA-mRNA	mmu-miR-677-5p (miRNA-mRNA) ENSMUSG00000054484	false
2909	miRNA-mRNA	mmu-miR-677-5p (miRNA-mRNA) ENSMUSG00000050447	false
2910	miRNA-mRNA	mmu-miR-677-5p (miRNA-mRNA) ENSMUSG00000045328	false
2911	miRNA-mRNA	mmu-miR-677-5p (miRNA-mRNA) ENSMUSG00000055296	false
2912	miRNA-mRNA	mmu-miR-677-5p (miRNA-mRNA) ENSMUSG00000047749	false
2913	miRNA-mRNA	mmu-miR-677-5p (miRNA-mRNA) ENSMUSG00000044066	false
2914	miRNA-mRNA	mmu-miR-677-5p (miRNA-mRNA) ENSMUSG00000039239	false
2915	miRNA-mRNA	mmu-miR-677-5p (miRNA-mRNA) ENSMUSG00000040584	false
2916	miRNA-mRNA	mmu-miR-677-5p (miRNA-mRNA) ENSMUSG00000041688	false
2917	miRNA-mRNA	mmu-miR-677-5p (miRNA-mRNA) ENSMUSG00000039831	false
2918	miRNA-mRNA	mmu-miR-677-5p (miRNA-mRNA) ENSMUSG00000041577	false
2919	miRNA-mRNA	mmu-miR-677-5p (miRNA-mRNA) ENSMUSG00000043154	false
2920	miRNA-mRNA	mmu-miR-677-5p (miRNA-mRNA) ENSMUSG00000040195	false
2921	miRNA-mRNA	mmu-miR-677-5p (miRNA-mRNA) ENSMUSG00000040852	false
2922	miRNA-mRNA	mmu-miR-677-5p (miRNA-mRNA) ENSMUSG00000040433	false
2923	miRNA-mRNA	mmu-miR-677-5p (miRNA-mRNA) ENSMUSG00000041995	false
2924	miRNA-mRNA	mmu-miR-677-5p (miRNA-mRNA) ENSMUSG00000039126	false
2925	miRNA-mRNA	mmu-miR-677-5p (miRNA-mRNA) ENSMUSG00000044033	false
2926	miRNA-mRNA	mmu-miR-677-5p (miRNA-mRNA) ENSMUSG00000037643	false
2927	miRNA-mRNA	mmu-miR-677-5p (miRNA-mRNA) ENSMUSG00000037306	false
2928	miRNA-mRNA	mmu-miR-677-5p (miRNA-mRNA) ENSMUSG00000038175	false
2929	miRNA-mRNA	mmu-miR-677-5p (miRNA-mRNA) ENSMUSG00000036875	false
2930	miRNA-mRNA	mmu-miR-677-5p (miRNA-mRNA) ENSMUSG00000038648	false
2931	miRNA-mRNA	mmu-miR-677-5p (miRNA-mRNA) ENSMUSG00000035164	false
2932	miRNA-mRNA	mmu-miR-677-5p (miRNA-mRNA) ENSMUSG00000036777	false
2933	miRNA-mRNA	mmu-miR-677-5p (miRNA-mRNA) ENSMUSG00000031903	false
2934	miRNA-mRNA	mmu-miR-677-5p (miRNA-mRNA) ENSMUSG00000032035	false
2935	miRNA-mRNA	mmu-miR-677-5p (miRNA-mRNA) ENSMUSG00000031561	false
2936	miRNA-mRNA	mmu-miR-677-5p (miRNA-mRNA) ENSMUSG00000033917	false
2937	miRNA-mRNA	mmu-miR-677-5p (miRNA-mRNA) ENSMUSG00000032218	false
2938	miRNA-mRNA	mmu-miR-677-5p (miRNA-mRNA) ENSMUSG00000031647	false
2939	miRNA-mRNA	mmu-miR-677-5p (miRNA-mRNA) ENSMUSG00000032902	false
2940	miRNA-mRNA	mmu-miR-677-5p (miRNA-mRNA) ENSMUSG00000032507	false
2941	miRNA-mRNA	mmu-miR-677-5p (miRNA-mRNA) ENSMUSG00000033411	false
2942	miRNA-mRNA	mmu-miR-677-5p (miRNA-mRNA) ENSMUSG00000032350	false
2943	miRNA-mRNA	mmu-miR-677-5p (miRNA-mRNA) ENSMUSG00000029516	false
2944	miRNA-mRNA	mmu-miR-677-5p (miRNA-mRNA) ENSMUSG00000031284	false
2945	miRNA-mRNA	mmu-miR-677-5p (miRNA-mRNA) ENSMUSG00000031004	false
2946	miRNA-mRNA	mmu-miR-677-5p (miRNA-mRNA) ENSMUSG00000028718	false
2947	miRNA-mRNA	mmu-miR-677-5p (miRNA-mRNA) ENSMUSG00000030671	false
2948	miRNA-mRNA	mmu-miR-677-5p (miRNA-mRNA) ENSMUSG00000028403	false
2949	miRNA-mRNA	mmu-miR-677-5p (miRNA-mRNA) ENSMUSG00000028463	false
2950	miRNA-mRNA	mmu-miR-677-5p (miRNA-mRNA) ENSMUSG00000029185	false
2951	miRNA-mRNA	mmu-miR-677-5p (miRNA-mRNA) ENSMUSG00000031129	false
2952	miRNA-mRNA	mmu-miR-677-5p (miRNA-mRNA) ENSMUSG00000028926	false
2953	miRNA-mRNA	mmu-miR-677-5p (miRNA-mRNA) ENSMUSG00000027808	false
2954	miRNA-mRNA	mmu-miR-677-5p (miRNA-mRNA) ENSMUSG00000026683	false
2955	miRNA-mRNA	mmu-miR-677-5p (miRNA-mRNA) ENSMUSG00000026605	false
2956	miRNA-mRNA	mmu-miR-677-5p (miRNA-mRNA) ENSMUSG00000027254	false
2957	miRNA-mRNA	mmu-miR-677-5p (miRNA-mRNA) ENSMUSG00000027797	false
2958	miRNA-mRNA	mmu-miR-677-5p (miRNA-mRNA) ENSMUSG00000025867	false
2959	miRNA-mRNA	mmu-miR-677-5p (miRNA-mRNA) ENSMUSG00000027878	false
2960	miRNA-mRNA	mmu-miR-677-5p (miRNA-mRNA) ENSMUSG00000027499	false
2961	miRNA-mRNA	mmu-miR-677-5p (miRNA-mRNA) ENSMUSG00000026360	false
2962	miRNA-mRNA	mmu-miR-677-5p (miRNA-mRNA) ENSMUSG00000024691	false
2963	miRNA-mRNA	mmu-miR-677-5p (miRNA-mRNA) ENSMUSG00000023272	false
2964	miRNA-mRNA	mmu-miR-677-5p (miRNA-mRNA) ENSMUSG00000022136	false
2965	miRNA-mRNA	mmu-miR-677-5p (miRNA-mRNA) ENSMUSG00000022346	false
2966	miRNA-mRNA	mmu-miR-677-5p (miRNA-mRNA) ENSMUSG00000024548	false
2967	miRNA-mRNA	mmu-miR-677-5p (miRNA-mRNA) ENSMUSG00000022231	false
2968	miRNA-mRNA	mmu-miR-677-5p (miRNA-mRNA) ENSMUSG00000023008	false
2969	miRNA-mRNA	mmu-miR-677-5p (miRNA-mRNA) ENSMUSG00000024533	false
2970	miRNA-mRNA	mmu-miR-677-5p (miRNA-mRNA) ENSMUSG00000022711	false
2971	miRNA-mRNA	mmu-miR-677-5p (miRNA-mRNA) ENSMUSG00000022358	false
2972	miRNA-mRNA	mmu-miR-677-5p (miRNA-mRNA) ENSMUSG00000020886	false
2973	miRNA-mRNA	mmu-miR-677-5p (miRNA-mRNA) ENSMUSG00000018548	false
2974	miRNA-mRNA	mmu-miR-677-5p (miRNA-mRNA) ENSMUSG00000019944	false
2975	miRNA-mRNA	mmu-miR-677-5p (miRNA-mRNA) ENSMUSG00000020846	false
2976	miRNA-mRNA	mmu-miR-677-5p (miRNA-mRNA) ENSMUSG00000020032	false
2977	miRNA-mRNA	mmu-miR-677-5p (miRNA-mRNA) ENSMUSG00000021373	false
2978	miRNA-mRNA	mmu-miR-677-5p (miRNA-mRNA) ENSMUSG00000020256	false
2979	miRNA-mRNA	mmu-miR-677-5p (miRNA-mRNA) ENSMUSG00000017550	false
2980	miRNA-mRNA	mmu-miR-677-5p (miRNA-mRNA) ENSMUSG00000005973	false
2981	miRNA-mRNA	mmu-miR-677-5p (miRNA-mRNA) ENSMUSG00000009418	false
2982	miRNA-mRNA	mmu-miR-677-5p (miRNA-mRNA) ENSMUSG00000000058	false
2983	miRNA-mRNA	mmu-miR-677-5p (miRNA-mRNA) ENSMUSG00000008575	false
2984	lincRNA-miRNA	ENSMUSG00000070392 (lincRNA-miRNA) mmu-miR-101a-3p	false
2985	lincRNA-miRNA	ENSMUSG00000070392 (lincRNA-miRNA) mmu-miR-677-5p	false
2986	lincRNA-miRNA	ENSMUSG00000070392 (lincRNA-miRNA) mmu-miR-7a-5p	false
2987	miRNA-mRNA	mmu-miR-7a-5p (miRNA-mRNA) ENSMUSG00000058006	false
2988	miRNA-mRNA	mmu-miR-7a-5p (miRNA-mRNA) ENSMUSG00000058392	false
2989	miRNA-mRNA	mmu-miR-7a-5p (miRNA-mRNA) ENSMUSG00000071984	false
2990	miRNA-mRNA	mmu-miR-7a-5p (miRNA-mRNA) ENSMUSG00000070056	false
2991	miRNA-mRNA	mmu-miR-7a-5p (miRNA-mRNA) ENSMUSG00000061455	false
2992	miRNA-mRNA	mmu-miR-7a-5p (miRNA-mRNA) ENSMUSG00000062070	false
2993	miRNA-mRNA	mmu-miR-7a-5p (miRNA-mRNA) ENSMUSG00000070733	false
2994	miRNA-mRNA	mmu-miR-7a-5p (miRNA-mRNA) ENSMUSG00000061462	false
2995	miRNA-mRNA	mmu-miR-7a-5p (miRNA-mRNA) ENSMUSG00000072235	false
2996	miRNA-mRNA	mmu-miR-7a-5p (miRNA-mRNA) ENSMUSG00000070867	false
2997	miRNA-mRNA	mmu-miR-7a-5p (miRNA-mRNA) ENSMUSG00000072623	false
2998	miRNA-mRNA	mmu-miR-7a-5p (miRNA-mRNA) ENSMUSG00000069114	false
2999	miRNA-mRNA	mmu-miR-7a-5p (miRNA-mRNA) ENSMUSG00000060961	false
3000	miRNA-mRNA	mmu-miR-7a-5p (miRNA-mRNA) ENSMUSG00000056050	false
3001	miRNA-mRNA	mmu-miR-7a-5p (miRNA-mRNA) ENSMUSG00000052384	false
3002	miRNA-mRNA	mmu-miR-7a-5p (miRNA-mRNA) ENSMUSG00000057335	false
3003	miRNA-mRNA	mmu-miR-7a-5p (miRNA-mRNA) ENSMUSG00000052135	false
3004	miRNA-mRNA	mmu-miR-7a-5p (miRNA-mRNA) ENSMUSG00000055980	false
3005	miRNA-mRNA	mmu-miR-7a-5p (miRNA-mRNA) ENSMUSG00000054321	false
3006	miRNA-mRNA	mmu-miR-7a-5p (miRNA-mRNA) ENSMUSG00000056758	false
3007	miRNA-mRNA	mmu-miR-7a-5p (miRNA-mRNA) ENSMUSG00000050064	false
3008	miRNA-mRNA	mmu-miR-7a-5p (miRNA-mRNA) ENSMUSG00000055296	false
3009	miRNA-mRNA	mmu-miR-7a-5p (miRNA-mRNA) ENSMUSG00000054115	false
3010	miRNA-mRNA	mmu-miR-7a-5p (miRNA-mRNA) ENSMUSG00000051177	false
3011	miRNA-mRNA	mmu-miR-7a-5p (miRNA-mRNA) ENSMUSG00000049288	false
3012	miRNA-mRNA	mmu-miR-7a-5p (miRNA-mRNA) ENSMUSG00000044340	false
3013	miRNA-mRNA	mmu-miR-7a-5p (miRNA-mRNA) ENSMUSG00000047749	false
3014	miRNA-mRNA	mmu-miR-7a-5p (miRNA-mRNA) ENSMUSG00000047205	false
3015	miRNA-mRNA	mmu-miR-7a-5p (miRNA-mRNA) ENSMUSG00000044456	false
3016	miRNA-mRNA	mmu-miR-7a-5p (miRNA-mRNA) ENSMUSG00000049670	false
3017	miRNA-mRNA	mmu-miR-7a-5p (miRNA-mRNA) ENSMUSG00000045312	false
3018	miRNA-mRNA	mmu-miR-7a-5p (miRNA-mRNA) ENSMUSG00000044288	false
3019	miRNA-mRNA	mmu-miR-7a-5p (miRNA-mRNA) ENSMUSG00000045838	false
3020	miRNA-mRNA	mmu-miR-7a-5p (miRNA-mRNA) ENSMUSG00000045763	false
3021	miRNA-mRNA	mmu-miR-7a-5p (miRNA-mRNA) ENSMUSG00000046841	false
3022	miRNA-mRNA	mmu-miR-7a-5p (miRNA-mRNA) ENSMUSG00000041688	false
3023	miRNA-mRNA	mmu-miR-7a-5p (miRNA-mRNA) ENSMUSG00000042828	false
3024	miRNA-mRNA	mmu-miR-7a-5p (miRNA-mRNA) ENSMUSG00000040118	false
3025	miRNA-mRNA	mmu-miR-7a-5p (miRNA-mRNA) ENSMUSG00000041390	false
3026	miRNA-mRNA	mmu-miR-7a-5p (miRNA-mRNA) ENSMUSG00000042367	false
3027	miRNA-mRNA	mmu-miR-7a-5p (miRNA-mRNA) ENSMUSG00000042851	false
3028	miRNA-mRNA	mmu-miR-7a-5p (miRNA-mRNA) ENSMUSG00000040274	false
3029	miRNA-mRNA	mmu-miR-7a-5p (miRNA-mRNA) ENSMUSG00000040918	false
3030	miRNA-mRNA	mmu-miR-7a-5p (miRNA-mRNA) ENSMUSG00000040433	false
3031	miRNA-mRNA	mmu-miR-7a-5p (miRNA-mRNA) ENSMUSG00000040717	false
3032	miRNA-mRNA	mmu-miR-7a-5p (miRNA-mRNA) ENSMUSG00000039982	false
3033	miRNA-mRNA	mmu-miR-7a-5p (miRNA-mRNA) ENSMUSG00000041577	false
3034	miRNA-mRNA	mmu-miR-7a-5p (miRNA-mRNA) ENSMUSG00000043885	false
3035	miRNA-mRNA	mmu-miR-7a-5p (miRNA-mRNA) ENSMUSG00000040195	false
3036	miRNA-mRNA	mmu-miR-7a-5p (miRNA-mRNA) ENSMUSG00000040389	false
3037	miRNA-mRNA	mmu-miR-7a-5p (miRNA-mRNA) ENSMUSG00000042834	false
3038	miRNA-mRNA	mmu-miR-7a-5p (miRNA-mRNA) ENSMUSG00000037606	false
3039	miRNA-mRNA	mmu-miR-7a-5p (miRNA-mRNA) ENSMUSG00000038893	false
3040	miRNA-mRNA	mmu-miR-7a-5p (miRNA-mRNA) ENSMUSG00000038463	false
3041	miRNA-mRNA	mmu-miR-7a-5p (miRNA-mRNA) ENSMUSG00000038178	false
3042	miRNA-mRNA	mmu-miR-7a-5p (miRNA-mRNA) ENSMUSG00000038224	false
3043	miRNA-mRNA	mmu-miR-7a-5p (miRNA-mRNA) ENSMUSG00000038175	false
3044	miRNA-mRNA	mmu-miR-7a-5p (miRNA-mRNA) ENSMUSG00000037643	false
3045	miRNA-mRNA	mmu-miR-7a-5p (miRNA-mRNA) ENSMUSG00000038248	false
3046	miRNA-mRNA	mmu-miR-7a-5p (miRNA-mRNA) ENSMUSG00000037822	false
3047	miRNA-mRNA	mmu-miR-7a-5p (miRNA-mRNA) ENSMUSG00000039126	false
3048	miRNA-mRNA	mmu-miR-7a-5p (miRNA-mRNA) ENSMUSG00000038068	false
3049	miRNA-mRNA	mmu-miR-7a-5p (miRNA-mRNA) ENSMUSG00000035615	false
3050	miRNA-mRNA	mmu-miR-7a-5p (miRNA-mRNA) ENSMUSG00000035158	false
3051	miRNA-mRNA	mmu-miR-7a-5p (miRNA-mRNA) ENSMUSG00000035164	false
3052	miRNA-mRNA	mmu-miR-7a-5p (miRNA-mRNA) ENSMUSG00000037447	false
3053	miRNA-mRNA	mmu-miR-7a-5p (miRNA-mRNA) ENSMUSG00000035901	false
3054	miRNA-mRNA	mmu-miR-7a-5p (miRNA-mRNA) ENSMUSG00000036887	false
3055	miRNA-mRNA	mmu-miR-7a-5p (miRNA-mRNA) ENSMUSG00000036053	false
3056	miRNA-mRNA	mmu-miR-7a-5p (miRNA-mRNA) ENSMUSG00000036745	false
3057	miRNA-mRNA	mmu-miR-7a-5p (miRNA-mRNA) ENSMUSG00000035274	false
3058	miRNA-mRNA	mmu-miR-7a-5p (miRNA-mRNA) ENSMUSG00000037239	false
3059	miRNA-mRNA	mmu-miR-7a-5p (miRNA-mRNA) ENSMUSG00000035847	false
3060	miRNA-mRNA	mmu-miR-7a-5p (miRNA-mRNA) ENSMUSG00000032733	false
3061	miRNA-mRNA	mmu-miR-7a-5p (miRNA-mRNA) ENSMUSG00000032531	false
3062	miRNA-mRNA	mmu-miR-7a-5p (miRNA-mRNA) ENSMUSG00000032902	false
3063	miRNA-mRNA	mmu-miR-7a-5p (miRNA-mRNA) ENSMUSG00000032625	false
3064	miRNA-mRNA	mmu-miR-7a-5p (miRNA-mRNA) ENSMUSG00000033174	false
3065	miRNA-mRNA	mmu-miR-7a-5p (miRNA-mRNA) ENSMUSG00000032997	false
3066	miRNA-mRNA	mmu-miR-7a-5p (miRNA-mRNA) ENSMUSG00000032350	false
3067	miRNA-mRNA	mmu-miR-7a-5p (miRNA-mRNA) ENSMUSG00000033763	false
3068	miRNA-mRNA	mmu-miR-7a-5p (miRNA-mRNA) ENSMUSG00000032285	false
3069	miRNA-mRNA	mmu-miR-7a-5p (miRNA-mRNA) ENSMUSG00000033871	false
3070	miRNA-mRNA	mmu-miR-7a-5p (miRNA-mRNA) ENSMUSG00000032373	false
3071	miRNA-mRNA	mmu-miR-7a-5p (miRNA-mRNA) ENSMUSG00000031284	false
3072	miRNA-mRNA	mmu-miR-7a-5p (miRNA-mRNA) ENSMUSG00000031596	false
3073	miRNA-mRNA	mmu-miR-7a-5p (miRNA-mRNA) ENSMUSG00000029716	false
3074	miRNA-mRNA	mmu-miR-7a-5p (miRNA-mRNA) ENSMUSG00000031262	false
3075	miRNA-mRNA	mmu-miR-7a-5p (miRNA-mRNA) ENSMUSG00000030353	false
3076	miRNA-mRNA	mmu-miR-7a-5p (miRNA-mRNA) ENSMUSG00000031557	false
3077	miRNA-mRNA	mmu-miR-7a-5p (miRNA-mRNA) ENSMUSG00000030830	false
3078	miRNA-mRNA	mmu-miR-7a-5p (miRNA-mRNA) ENSMUSG00000031570	false
3079	miRNA-mRNA	mmu-miR-7a-5p (miRNA-mRNA) ENSMUSG00000030359	false
3080	miRNA-mRNA	mmu-miR-7a-5p (miRNA-mRNA) ENSMUSG00000031561	false
3081	miRNA-mRNA	mmu-miR-7a-5p (miRNA-mRNA) ENSMUSG00000031669	false
3082	miRNA-mRNA	mmu-miR-7a-5p (miRNA-mRNA) ENSMUSG00000031129	false
3083	miRNA-mRNA	mmu-miR-7a-5p (miRNA-mRNA) ENSMUSG00000031004	false
3084	miRNA-mRNA	mmu-miR-7a-5p (miRNA-mRNA) ENSMUSG00000030772	false
3085	miRNA-mRNA	mmu-miR-7a-5p (miRNA-mRNA) ENSMUSG00000028312	false
3086	miRNA-mRNA	mmu-miR-7a-5p (miRNA-mRNA) ENSMUSG00000027797	false
3087	miRNA-mRNA	mmu-miR-7a-5p (miRNA-mRNA) ENSMUSG00000028282	false
3088	miRNA-mRNA	mmu-miR-7a-5p (miRNA-mRNA) ENSMUSG00000027641	false
3089	miRNA-mRNA	mmu-miR-7a-5p (miRNA-mRNA) ENSMUSG00000029101	false
3090	miRNA-mRNA	mmu-miR-7a-5p (miRNA-mRNA) ENSMUSG00000028019	false
3091	miRNA-mRNA	mmu-miR-7a-5p (miRNA-mRNA) ENSMUSG00000028633	false
3092	miRNA-mRNA	mmu-miR-7a-5p (miRNA-mRNA) ENSMUSG00000028403	false
3093	miRNA-mRNA	mmu-miR-7a-5p (miRNA-mRNA) ENSMUSG00000026473	false
3094	miRNA-mRNA	mmu-miR-7a-5p (miRNA-mRNA) ENSMUSG00000026923	false
3095	miRNA-mRNA	mmu-miR-7a-5p (miRNA-mRNA) ENSMUSG00000026259	false
3096	miRNA-mRNA	mmu-miR-7a-5p (miRNA-mRNA) ENSMUSG00000026482	false
3097	miRNA-mRNA	mmu-miR-7a-5p (miRNA-mRNA) ENSMUSG00000027513	false
3098	miRNA-mRNA	mmu-miR-7a-5p (miRNA-mRNA) ENSMUSG00000026335	false
3099	miRNA-mRNA	mmu-miR-7a-5p (miRNA-mRNA) ENSMUSG00000026272	false
3100	miRNA-mRNA	mmu-miR-7a-5p (miRNA-mRNA) ENSMUSG00000027496	false
3101	miRNA-mRNA	mmu-miR-7a-5p (miRNA-mRNA) ENSMUSG00000026131	false
3102	miRNA-mRNA	mmu-miR-7a-5p (miRNA-mRNA) ENSMUSG00000026605	false
3103	miRNA-mRNA	mmu-miR-7a-5p (miRNA-mRNA) ENSMUSG00000026657	false
3104	miRNA-mRNA	mmu-miR-7a-5p (miRNA-mRNA) ENSMUSG00000026072	false
3105	miRNA-mRNA	mmu-miR-7a-5p (miRNA-mRNA) ENSMUSG00000026737	false
3106	miRNA-mRNA	mmu-miR-7a-5p (miRNA-mRNA) ENSMUSG00000027006	false
3107	miRNA-mRNA	mmu-miR-7a-5p (miRNA-mRNA) ENSMUSG00000026782	false
3108	miRNA-mRNA	mmu-miR-7a-5p (miRNA-mRNA) ENSMUSG00000027499	false
3109	miRNA-mRNA	mmu-miR-7a-5p (miRNA-mRNA) ENSMUSG00000025810	false
3110	miRNA-mRNA	mmu-miR-7a-5p (miRNA-mRNA) ENSMUSG00000025019	false
3111	miRNA-mRNA	mmu-miR-7a-5p (miRNA-mRNA) ENSMUSG00000024548	false
3112	miRNA-mRNA	mmu-miR-7a-5p (miRNA-mRNA) ENSMUSG00000025867	false
3113	miRNA-mRNA	mmu-miR-7a-5p (miRNA-mRNA) ENSMUSG00000025403	false
3114	miRNA-mRNA	mmu-miR-7a-5p (miRNA-mRNA) ENSMUSG00000025085	false
3115	miRNA-mRNA	mmu-miR-7a-5p (miRNA-mRNA) ENSMUSG00000024501	false
3116	miRNA-mRNA	mmu-miR-7a-5p (miRNA-mRNA) ENSMUSG00000024807	false
3117	miRNA-mRNA	mmu-miR-7a-5p (miRNA-mRNA) ENSMUSG00000022091	false
3118	miRNA-mRNA	mmu-miR-7a-5p (miRNA-mRNA) ENSMUSG00000022043	false
3119	miRNA-mRNA	mmu-miR-7a-5p (miRNA-mRNA) ENSMUSG00000021952	false
3120	miRNA-mRNA	mmu-miR-7a-5p (miRNA-mRNA) ENSMUSG00000021846	false
3121	miRNA-mRNA	mmu-miR-7a-5p (miRNA-mRNA) ENSMUSG00000022358	false
3122	miRNA-mRNA	mmu-miR-7a-5p (miRNA-mRNA) ENSMUSG00000022048	false
3123	miRNA-mRNA	mmu-miR-7a-5p (miRNA-mRNA) ENSMUSG00000022505	false
3124	miRNA-mRNA	mmu-miR-7a-5p (miRNA-mRNA) ENSMUSG00000020649	false
3125	miRNA-mRNA	mmu-miR-7a-5p (miRNA-mRNA) ENSMUSG00000020668	false
3126	miRNA-mRNA	mmu-miR-7a-5p (miRNA-mRNA) ENSMUSG00000019944	false
3127	miRNA-mRNA	mmu-miR-7a-5p (miRNA-mRNA) ENSMUSG00000020333	false
3128	miRNA-mRNA	mmu-miR-7a-5p (miRNA-mRNA) ENSMUSG00000021265	false
3129	miRNA-mRNA	mmu-miR-7a-5p (miRNA-mRNA) ENSMUSG00000019564	false
3130	miRNA-mRNA	mmu-miR-7a-5p (miRNA-mRNA) ENSMUSG00000019124	false
3131	miRNA-mRNA	mmu-miR-7a-5p (miRNA-mRNA) ENSMUSG00000019232	false
3132	miRNA-mRNA	mmu-miR-7a-5p (miRNA-mRNA) ENSMUSG00000008734	false
3133	miRNA-mRNA	mmu-miR-7a-5p (miRNA-mRNA) ENSMUSG00000014786	false
3134	miRNA-mRNA	mmu-miR-7a-5p (miRNA-mRNA) ENSMUSG00000017009	false
3135	miRNA-mRNA	mmu-miR-7a-5p (miRNA-mRNA) ENSMUSG00000018899	false
3136	miRNA-mRNA	mmu-miR-7a-5p (miRNA-mRNA) ENSMUSG00000014444	false
3137	miRNA-mRNA	mmu-miR-7a-5p (miRNA-mRNA) ENSMUSG00000015837	false
3138	miRNA-mRNA	mmu-miR-7a-5p (miRNA-mRNA) ENSMUSG00000009418	false
3139	miRNA-mRNA	mmu-miR-7a-5p (miRNA-mRNA) ENSMUSG00000013846	false
3140	miRNA-mRNA	mmu-miR-7a-5p (miRNA-mRNA) ENSMUSG00000001333	false
3141	miRNA-mRNA	mmu-miR-7a-5p (miRNA-mRNA) ENSMUSG00000005533	false
3142	miRNA-mRNA	mmu-miR-7a-5p (miRNA-mRNA) ENSMUSG00000001525	false
3143	miRNA-mRNA	mmu-miR-7a-5p (miRNA-mRNA) ENSMUSG00000002265	false
3144	miRNA-mRNA	mmu-miR-7a-5p (miRNA-mRNA) ENSMUSG00000003032	false
3145	lincRNA-miRNA	ENSMUSG00000072694 (lincRNA-miRNA) mmu-miR-152-3p	false
3146	lincRNA-miRNA	ENSMUSG00000072694 (lincRNA-miRNA) mmu-miR-101a-3p	false
3147	lincRNA-miRNA	ENSMUSG00000072694 (lincRNA-miRNA) mmu-miR-677-5p	false
3148	lincRNA-miRNA	ENSMUSG00000072694 (lincRNA-miRNA) mmu-miR-7a-5p	false
3149	lincRNA-miRNA	ENSMUSG00000106847 (lincRNA-miRNA) mmu-miR-101a-3p	false
3150	lincRNA-miRNA	ENSMUSG00000106847 (lincRNA-miRNA) mmu-miR-195a-5p	false
3151	lincRNA-miRNA	ENSMUSG00000106847 (lincRNA-miRNA) mmu-miR-7a-5p	false
3152	lincRNA-miRNA	ENSMUSG00000106847 (lincRNA-miRNA) mmu-miR-497a-5p	false
3153	lincRNA-miRNA	ENSMUSG00000064043 (lincRNA-miRNA) mmu-miR-152-3p	false
3154	lincRNA-miRNA	ENSMUSG00000064043 (lincRNA-miRNA) mmu-miR-101a-3p	false
3155	lincRNA-miRNA	ENSMUSG00000064043 (lincRNA-miRNA) mmu-miR-677-5p	false
3156	lincRNA-miRNA	ENSMUSG00000064043 (lincRNA-miRNA) mmu-miR-222-3p	false
3157	lincRNA-miRNA	ENSMUSG00000099519 (lincRNA-miRNA) mmu-miR-101c	false
3158	lincRNA-miRNA	ENSMUSG00000099519 (lincRNA-miRNA) mmu-let-7e-5p	false
3159	lincRNA-miRNA	ENSMUSG00000099519 (lincRNA-miRNA) mmu-miR-130a-3p	false
3160	lincRNA-miRNA	ENSMUSG00000099519 (lincRNA-miRNA) mmu-miR-210-3p	false
3161	lincRNA-miRNA	ENSMUSG00000099519 (lincRNA-miRNA) mmu-miR-7a-5p	false
3162	lincRNA-miRNA	ENSMUSG00000099519 (lincRNA-miRNA) mmu-miR-497a-5p	false
3163	lincRNA-miRNA	ENSMUSG00000099519 (lincRNA-miRNA) mmu-miR-222-3p	false
3164	lincRNA-miRNA	ENSMUSG00000096944 (lincRNA-miRNA) mmu-miR-7a-5p	false
3165	lincRNA-miRNA	ENSMUSG00000096944 (lincRNA-miRNA) mmu-miR-222-3p	false
3166	miRNA-mRNA	mmu-miR-222-3p (miRNA-mRNA) ENSMUSG00000051579	false
3167	miRNA-mRNA	mmu-miR-222-3p (miRNA-mRNA) ENSMUSG00000053580	false
3168	miRNA-mRNA	mmu-miR-222-3p (miRNA-mRNA) ENSMUSG00000049044	false
3169	miRNA-mRNA	mmu-miR-222-3p (miRNA-mRNA) ENSMUSG00000049807	false
3170	miRNA-mRNA	mmu-miR-222-3p (miRNA-mRNA) ENSMUSG00000054723	false
3171	miRNA-mRNA	mmu-miR-222-3p (miRNA-mRNA) ENSMUSG00000069255	false
3172	miRNA-mRNA	mmu-miR-222-3p (miRNA-mRNA) ENSMUSG00000052331	false
3173	miRNA-mRNA	mmu-miR-222-3p (miRNA-mRNA) ENSMUSG00000056492	false
3174	miRNA-mRNA	mmu-miR-222-3p (miRNA-mRNA) ENSMUSG00000053279	false
3175	miRNA-mRNA	mmu-miR-222-3p (miRNA-mRNA) ENSMUSG00000060961	false
3176	miRNA-mRNA	mmu-miR-222-3p (miRNA-mRNA) ENSMUSG00000072623	false
3177	miRNA-mRNA	mmu-miR-222-3p (miRNA-mRNA) ENSMUSG00000070867	false
3178	miRNA-mRNA	mmu-miR-222-3p (miRNA-mRNA) ENSMUSG00000041741	false
3179	miRNA-mRNA	mmu-miR-222-3p (miRNA-mRNA) ENSMUSG00000041168	false
3180	miRNA-mRNA	mmu-miR-222-3p (miRNA-mRNA) ENSMUSG00000041147	false
3181	miRNA-mRNA	mmu-miR-222-3p (miRNA-mRNA) ENSMUSG00000042675	false
3182	miRNA-mRNA	mmu-miR-222-3p (miRNA-mRNA) ENSMUSG00000044288	false
3183	miRNA-mRNA	mmu-miR-222-3p (miRNA-mRNA) ENSMUSG00000040389	false
3184	miRNA-mRNA	mmu-miR-222-3p (miRNA-mRNA) ENSMUSG00000043391	false
3185	miRNA-mRNA	mmu-miR-222-3p (miRNA-mRNA) ENSMUSG00000037822	false
3186	miRNA-mRNA	mmu-miR-222-3p (miRNA-mRNA) ENSMUSG00000032086	false
3187	miRNA-mRNA	mmu-miR-222-3p (miRNA-mRNA) ENSMUSG00000031596	false
3188	miRNA-mRNA	mmu-miR-222-3p (miRNA-mRNA) ENSMUSG00000032902	false
3189	miRNA-mRNA	mmu-miR-222-3p (miRNA-mRNA) ENSMUSG00000032035	false
3190	miRNA-mRNA	mmu-miR-222-3p (miRNA-mRNA) ENSMUSG00000031558	false
3191	miRNA-mRNA	mmu-miR-222-3p (miRNA-mRNA) ENSMUSG00000031532	false
3192	miRNA-mRNA	mmu-miR-222-3p (miRNA-mRNA) ENSMUSG00000035164	false
3193	miRNA-mRNA	mmu-miR-222-3p (miRNA-mRNA) ENSMUSG00000038146	false
3194	miRNA-mRNA	mmu-miR-222-3p (miRNA-mRNA) ENSMUSG00000032377	false
3195	miRNA-mRNA	mmu-miR-222-3p (miRNA-mRNA) ENSMUSG00000034111	false
3196	miRNA-mRNA	mmu-miR-222-3p (miRNA-mRNA) ENSMUSG00000034675	false
3197	miRNA-mRNA	mmu-miR-222-3p (miRNA-mRNA) ENSMUSG00000029516	false
3198	miRNA-mRNA	mmu-miR-222-3p (miRNA-mRNA) ENSMUSG00000030353	false
3199	miRNA-mRNA	mmu-miR-222-3p (miRNA-mRNA) ENSMUSG00000030782	false
3200	miRNA-mRNA	mmu-miR-222-3p (miRNA-mRNA) ENSMUSG00000027822	false
3201	miRNA-mRNA	mmu-miR-222-3p (miRNA-mRNA) ENSMUSG00000028282	false
3202	miRNA-mRNA	mmu-miR-222-3p (miRNA-mRNA) ENSMUSG00000028403	false
3203	miRNA-mRNA	mmu-miR-222-3p (miRNA-mRNA) ENSMUSG00000021831	false
3204	miRNA-mRNA	mmu-miR-222-3p (miRNA-mRNA) ENSMUSG00000025085	false
3205	miRNA-mRNA	mmu-miR-222-3p (miRNA-mRNA) ENSMUSG00000024431	false
3206	miRNA-mRNA	mmu-miR-222-3p (miRNA-mRNA) ENSMUSG00000025026	false
3207	miRNA-mRNA	mmu-miR-222-3p (miRNA-mRNA) ENSMUSG00000021952	false
3208	miRNA-mRNA	mmu-miR-222-3p (miRNA-mRNA) ENSMUSG00000026272	false
3209	miRNA-mRNA	mmu-miR-222-3p (miRNA-mRNA) ENSMUSG00000025938	false
3210	miRNA-mRNA	mmu-miR-222-3p (miRNA-mRNA) ENSMUSG00000025089	false
3211	miRNA-mRNA	mmu-miR-222-3p (miRNA-mRNA) ENSMUSG00000022043	false
3212	miRNA-mRNA	mmu-miR-222-3p (miRNA-mRNA) ENSMUSG00000025403	false
3213	miRNA-mRNA	mmu-miR-222-3p (miRNA-mRNA) ENSMUSG00000013846	false
3214	miRNA-mRNA	mmu-miR-222-3p (miRNA-mRNA) ENSMUSG00000018548	false
3215	miRNA-mRNA	mmu-miR-222-3p (miRNA-mRNA) ENSMUSG00000019942	false
3216	miRNA-mRNA	mmu-miR-222-3p (miRNA-mRNA) ENSMUSG00000017009	false
3217	miRNA-mRNA	mmu-miR-222-3p (miRNA-mRNA) ENSMUSG00000002107	false
3218	miRNA-mRNA	mmu-miR-222-3p (miRNA-mRNA) ENSMUSG00000019831	false
3219	miRNA-mRNA	mmu-miR-222-3p (miRNA-mRNA) ENSMUSG00000020044	false
3220	miRNA-mRNA	mmu-miR-222-3p (miRNA-mRNA) ENSMUSG00000020423	false
3221	lincRNA-miRNA	ENSMUSG00000096954 (lincRNA-miRNA) mmu-miR-101c	false
3222	lincRNA-miRNA	ENSMUSG00000096954 (lincRNA-miRNA) mmu-miR-101a-3p	false
3223	lincRNA-miRNA	ENSMUSG00000096954 (lincRNA-miRNA) mmu-miR-222-3p	false
3224	lincRNA-miRNA	ENSMUSG00000086503 (lincRNA-miRNA) mmu-miR-152-3p	false
3225	lincRNA-miRNA	ENSMUSG00000086503 (lincRNA-miRNA) mmu-miR-218-5p	false
3226	lincRNA-miRNA	ENSMUSG00000086503 (lincRNA-miRNA) mmu-miR-101a-3p	false
3227	lincRNA-miRNA	ENSMUSG00000086503 (lincRNA-miRNA) mmu-miR-210-3p	false
3228	lincRNA-miRNA	ENSMUSG00000086503 (lincRNA-miRNA) mmu-miR-677-5p	false
3229	lincRNA-miRNA	ENSMUSG00000086503 (lincRNA-miRNA) mmu-miR-7a-5p	false
3230	lincRNA-miRNA	ENSMUSG00000086503 (lincRNA-miRNA) mmu-miR-222-3p	false
3231	lincRNA-Protein	ENSMUSG00000086503 (lincRNA-Protein) ENSMUSG00000072244	false
3232	lincRNA-Protein	ENSMUSG00000075511 (lincRNA-Protein) ENSMUSG00000039231	false
3233	miRNA-mRNA	mmu-miR-101c (miRNA-mRNA) ENSMUSG00000031596	false
3234	miRNA-mRNA	mmu-miR-101c (miRNA-mRNA) ENSMUSG00000028076	false
3235	miRNA-mRNA	mmu-miR-101c (miRNA-mRNA) ENSMUSG00000020534	false
3236	miRNA-mRNA	mmu-miR-101c (miRNA-mRNA) ENSMUSG00000035451	false
3237	miRNA-mRNA	mmu-miR-101c (miRNA-mRNA) ENSMUSG00000032932	false
3238	miRNA-mRNA	mmu-miR-101c (miRNA-mRNA) ENSMUSG00000033530	false
3239	miRNA-mRNA	mmu-miR-101c (miRNA-mRNA) ENSMUSG00000020423	false
3240	lincRNA-miRNA	ENSMUSG00000075010 (lincRNA-miRNA) mmu-let-7e-5p	false
3241	lincRNA-miRNA	ENSMUSG00000099364 (lincRNA-miRNA) mmu-miR-152-3p	false
3242	lincRNA-miRNA	ENSMUSG00000099364 (lincRNA-miRNA) mmu-miR-218-5p	false
3243	lincRNA-miRNA	ENSMUSG00000099364 (lincRNA-miRNA) mmu-miR-677-5p	false
3244	lincRNA-miRNA	ENSMUSG00000099364 (lincRNA-miRNA) mmu-miR-7a-5p	false
3245	lincRNA-miRNA	ENSMUSG00000107879 (lincRNA-miRNA) mmu-miR-152-3p	false
3246	lincRNA-miRNA	ENSMUSG00000097059 (lincRNA-miRNA) mmu-miR-7a-5p	false
3247	TF-TG	ENSMUSG00000052942 (TF-TG) ENSMUSG00000044312	false
3248	TF-TG	ENSMUSG00000046179 (TF-TG) ENSMUSG00000070348	false
3249	TF-TG	ENSMUSG00000046179 (TF-TG) ENSMUSG00000027490	false
3250	TF-TG	ENSMUSG00000046179 (TF-TG) ENSMUSG00000020185	false
3251	TF-TG	ENSMUSG00000044312 (TF-TG) ENSMUSG00000068154	false
3252	TF-TG	ENSMUSG00000044312 (TF-TG) ENSMUSG00000051251	false
3253	TF-TG	ENSMUSG00000044312 (TF-TG) ENSMUSG00000037621	false
3254	TF-TG	ENSMUSG00000044312 (TF-TG) ENSMUSG00000034701	false
3255	TF-TG	ENSMUSG00000044312 (TF-TG) ENSMUSG00000029706	false
3256	TF-TG	ENSMUSG00000037279 (TF-TG) ENSMUSG00000089789	false
3257	TF-TG	ENSMUSG00000037279 (TF-TG) ENSMUSG00000079037	false
3258	TF-TG	ENSMUSG00000037279 (TF-TG) ENSMUSG00000078185	false
3259	TF-TG	ENSMUSG00000037279 (TF-TG) ENSMUSG00000074476	false
3260	TF-TG	ENSMUSG00000037279 (TF-TG) ENSMUSG00000072812	false
3261	TF-TG	ENSMUSG00000037279 (TF-TG) ENSMUSG00000067750	false
3262	TF-TG	ENSMUSG00000037279 (TF-TG) ENSMUSG00000062078	false
3263	TF-TG	ENSMUSG00000037279 (TF-TG) ENSMUSG00000059060	false
3264	TF-TG	ENSMUSG00000037279 (TF-TG) ENSMUSG00000056185	false
3265	TF-TG	ENSMUSG00000037279 (TF-TG) ENSMUSG00000054893	false
3266	TF-TG	ENSMUSG00000037279 (TF-TG) ENSMUSG00000049858	false
3267	TF-TG	ENSMUSG00000037279 (TF-TG) ENSMUSG00000049288	false
3268	TF-TG	ENSMUSG00000037279 (TF-TG) ENSMUSG00000048200	false
3269	TF-TG	ENSMUSG00000037279 (TF-TG) ENSMUSG00000043439	false
3270	TF-TG	ENSMUSG00000037279 (TF-TG) ENSMUSG00000042675	false
3271	TF-TG	ENSMUSG00000037279 (TF-TG) ENSMUSG00000041577	false
3272	TF-TG	ENSMUSG00000037279 (TF-TG) ENSMUSG00000040852	false
3273	TF-TG	ENSMUSG00000037279 (TF-TG) ENSMUSG00000040433	false
3274	TF-TG	ENSMUSG00000037279 (TF-TG) ENSMUSG00000039982	false
3275	TF-TG	ENSMUSG00000037279 (TF-TG) ENSMUSG00000039814	false
3276	TF-TG	ENSMUSG00000037279 (TF-TG) ENSMUSG00000038039	false
3277	TF-TG	ENSMUSG00000037279 (TF-TG) ENSMUSG00000037621	false
3278	TF-TG	ENSMUSG00000037279 (TF-TG) ENSMUSG00000033287	false
3279	TF-TG	ENSMUSG00000037279 (TF-TG) ENSMUSG00000031778	false
3280	TF-TG	ENSMUSG00000037279 (TF-TG) ENSMUSG00000029101	false
3281	TF-TG	ENSMUSG00000037279 (TF-TG) ENSMUSG00000028341	false
3282	TF-TG	ENSMUSG00000037279 (TF-TG) ENSMUSG00000027544	false
3283	TF-TG	ENSMUSG00000037279 (TF-TG) ENSMUSG00000027496	false
3284	TF-TG	ENSMUSG00000037279 (TF-TG) ENSMUSG00000026728	false
3285	TF-TG	ENSMUSG00000037279 (TF-TG) ENSMUSG00000026281	false
3286	TF-TG	ENSMUSG00000037279 (TF-TG) ENSMUSG00000025912	false
3287	TF-TG	ENSMUSG00000037279 (TF-TG) ENSMUSG00000024912	false
3288	TF-TG	ENSMUSG00000037279 (TF-TG) ENSMUSG00000024193	false
3289	TF-TG	ENSMUSG00000037279 (TF-TG) ENSMUSG00000023913	false
3290	TF-TG	ENSMUSG00000037279 (TF-TG) ENSMUSG00000023004	false
3291	TF-TG	ENSMUSG00000037279 (TF-TG) ENSMUSG00000022619	false
3292	TF-TG	ENSMUSG00000037279 (TF-TG) ENSMUSG00000022346	false
3293	TF-TG	ENSMUSG00000037279 (TF-TG) ENSMUSG00000020649	false
3294	TF-TG	ENSMUSG00000037279 (TF-TG) ENSMUSG00000020620	false
3295	TF-TG	ENSMUSG00000037279 (TF-TG) ENSMUSG00000020571	false
3296	TF-TG	ENSMUSG00000037279 (TF-TG) ENSMUSG00000019235	false
3297	TF-TG	ENSMUSG00000037279 (TF-TG) ENSMUSG00000018899	false
3298	TF-TG	ENSMUSG00000037279 (TF-TG) ENSMUSG00000017466	false
3299	TF-TG	ENSMUSG00000037279 (TF-TG) ENSMUSG00000017009	false
3300	TF-TG	ENSMUSG00000037279 (TF-TG) ENSMUSG00000014786	false
3301	TF-TG	ENSMUSG00000028466 (TF-TG) ENSMUSG00000031770	false
3302	TF-miRNA	ENSMUSG00000034701 (TF-miRNA) mmu-miR-1945	false
3303	TF-lincRNA	ENSMUSG00000034701 (TF-lincRNA) ENSMUSG00000097515	false
3304	TF-lincRNA	ENSMUSG00000034701 (TF-lincRNA) ENSMUSG00000085329	false
3305	TF-lincRNA	ENSMUSG00000034701 (TF-lincRNA) ENSMUSG00000087196	false
3306	TF-lincRNA	ENSMUSG00000034701 (TF-lincRNA) ENSMUSG00000075010	false
3307	TF-lincRNA	ENSMUSG00000034701 (TF-lincRNA) ENSMUSG00000099025	false
3308	TF-lincRNA	ENSMUSG00000034701 (TF-lincRNA) ENSMUSG00000097415	false
3309	TF-lincRNA	ENSMUSG00000034701 (TF-lincRNA) ENSMUSG00000110276	false
3310	TF-lincRNA	ENSMUSG00000034701 (TF-lincRNA) ENSMUSG00000097284	false
3311	TF-lincRNA	ENSMUSG00000034701 (TF-lincRNA) ENSMUSG00000099552	false
3312	TF-lincRNA	ENSMUSG00000034701 (TF-lincRNA) ENSMUSG00000097561	false
3313	TF-lincRNA	ENSMUSG00000034701 (TF-lincRNA) ENSMUSG00000105146	false
3314	TF-TG	ENSMUSG00000034701 (TF-TG) ENSMUSG00000098557	false
3315	TF-TG	ENSMUSG00000034701 (TF-TG) ENSMUSG00000098132	false
3316	TF-TG	ENSMUSG00000034701 (TF-TG) ENSMUSG00000096847	false
3317	TF-TG	ENSMUSG00000034701 (TF-TG) ENSMUSG00000094928	false
3318	TF-TG	ENSMUSG00000034701 (TF-TG) ENSMUSG00000094626	false
3319	TF-TG	ENSMUSG00000034701 (TF-TG) ENSMUSG00000092486	false
3320	TF-TG	ENSMUSG00000034701 (TF-TG) ENSMUSG00000092083	false
3321	TF-TG	ENSMUSG00000034701 (TF-TG) ENSMUSG00000089789	false
3322	TF-TG	ENSMUSG00000034701 (TF-TG) ENSMUSG00000087651	false
3323	TF-TG	ENSMUSG00000034701 (TF-TG) ENSMUSG00000079553	false
3324	TF-TG	ENSMUSG00000034701 (TF-TG) ENSMUSG00000079471	false
3325	TF-TG	ENSMUSG00000034701 (TF-TG) ENSMUSG00000079442	false
3326	TF-TG	ENSMUSG00000034701 (TF-TG) ENSMUSG00000079056	false
3327	TF-TG	ENSMUSG00000034701 (TF-TG) ENSMUSG00000079015	false
3328	TF-TG	ENSMUSG00000034701 (TF-TG) ENSMUSG00000075610	false
3329	TF-TG	ENSMUSG00000034701 (TF-TG) ENSMUSG00000075012	false
3330	TF-TG	ENSMUSG00000034701 (TF-TG) ENSMUSG00000074892	false
3331	TF-TG	ENSMUSG00000034701 (TF-TG) ENSMUSG00000074715	false
3332	TF-TG	ENSMUSG00000034701 (TF-TG) ENSMUSG00000074652	false
3333	TF-TG	ENSMUSG00000034701 (TF-TG) ENSMUSG00000074476	false
3334	TF-TG	ENSMUSG00000034701 (TF-TG) ENSMUSG00000074345	false
3335	TF-TG	ENSMUSG00000034701 (TF-TG) ENSMUSG00000074004	false
3336	TF-TG	ENSMUSG00000034701 (TF-TG) ENSMUSG00000073530	false
3337	TF-TG	ENSMUSG00000034701 (TF-TG) ENSMUSG00000073399	false
3338	TF-TG	ENSMUSG00000034701 (TF-TG) ENSMUSG00000073293	false
3339	TF-TG	ENSMUSG00000034701 (TF-TG) ENSMUSG00000073043	false
3340	TF-TG	ENSMUSG00000034701 (TF-TG) ENSMUSG00000072849	false
3341	TF-TG	ENSMUSG00000034701 (TF-TG) ENSMUSG00000072115	false
3342	TF-TG	ENSMUSG00000034701 (TF-TG) ENSMUSG00000072082	false
3343	TF-TG	ENSMUSG00000034701 (TF-TG) ENSMUSG00000071856	false
3344	TF-TG	ENSMUSG00000034701 (TF-TG) ENSMUSG00000071553	false
3345	TF-TG	ENSMUSG00000034701 (TF-TG) ENSMUSG00000071547	false
3346	TF-TG	ENSMUSG00000034701 (TF-TG) ENSMUSG00000071113	false
3347	TF-TG	ENSMUSG00000034701 (TF-TG) ENSMUSG00000070802	false
3348	TF-TG	ENSMUSG00000034701 (TF-TG) ENSMUSG00000070733	false
3349	TF-TG	ENSMUSG00000034701 (TF-TG) ENSMUSG00000070532	false
3350	TF-TG	ENSMUSG00000034701 (TF-TG) ENSMUSG00000070423	false
3351	TF-TG	ENSMUSG00000034701 (TF-TG) ENSMUSG00000070407	false
3352	TF-TG	ENSMUSG00000034701 (TF-TG) ENSMUSG00000070348	false
3353	TF-TG	ENSMUSG00000034701 (TF-TG) ENSMUSG00000070337	false
3354	TF-TG	ENSMUSG00000034701 (TF-TG) ENSMUSG00000070287	false
3355	TF-TG	ENSMUSG00000034701 (TF-TG) ENSMUSG00000069515	false
3356	TF-TG	ENSMUSG00000034701 (TF-TG) ENSMUSG00000069255	false
3357	TF-TG	ENSMUSG00000034701 (TF-TG) ENSMUSG00000069227	false
3358	TF-TG	ENSMUSG00000034701 (TF-TG) ENSMUSG00000068735	false
3359	TF-TG	ENSMUSG00000034701 (TF-TG) ENSMUSG00000068617	false
3360	TF-TG	ENSMUSG00000034701 (TF-TG) ENSMUSG00000068196	false
3361	TF-TG	ENSMUSG00000034701 (TF-TG) ENSMUSG00000068154	false
3362	TF-TG	ENSMUSG00000034701 (TF-TG) ENSMUSG00000067724	false
3363	TF-TG	ENSMUSG00000034701 (TF-TG) ENSMUSG00000066952	false
3364	TF-TG	ENSMUSG00000034701 (TF-TG) ENSMUSG00000066705	false
3365	TF-TG	ENSMUSG00000034701 (TF-TG) ENSMUSG00000066324	false
3366	TF-TG	ENSMUSG00000034701 (TF-TG) ENSMUSG00000066191	false
3367	TF-TG	ENSMUSG00000034701 (TF-TG) ENSMUSG00000066152	false
3368	TF-TG	ENSMUSG00000034701 (TF-TG) ENSMUSG00000066090	false
3369	TF-TG	ENSMUSG00000034701 (TF-TG) ENSMUSG00000064272	false
3370	TF-TG	ENSMUSG00000034701 (TF-TG) ENSMUSG00000064262	false
3371	TF-TG	ENSMUSG00000034701 (TF-TG) ENSMUSG00000064215	false
3372	TF-TG	ENSMUSG00000034701 (TF-TG) ENSMUSG00000063929	false
3373	TF-TG	ENSMUSG00000034701 (TF-TG) ENSMUSG00000063851	false
3374	TF-TG	ENSMUSG00000034701 (TF-TG) ENSMUSG00000063810	false
3375	TF-TG	ENSMUSG00000034701 (TF-TG) ENSMUSG00000063568	false
3376	TF-TG	ENSMUSG00000034701 (TF-TG) ENSMUSG00000062859	false
3377	TF-TG	ENSMUSG00000034701 (TF-TG) ENSMUSG00000062826	false
3378	TF-TG	ENSMUSG00000034701 (TF-TG) ENSMUSG00000062760	false
3379	TF-TG	ENSMUSG00000034701 (TF-TG) ENSMUSG00000062070	false
3380	TF-TG	ENSMUSG00000034701 (TF-TG) ENSMUSG00000061607	false
3381	TF-TG	ENSMUSG00000034701 (TF-TG) ENSMUSG00000061601	false
3382	TF-TG	ENSMUSG00000034701 (TF-TG) ENSMUSG00000061533	false
3383	TF-TG	ENSMUSG00000034701 (TF-TG) ENSMUSG00000061462	false
3384	TF-TG	ENSMUSG00000034701 (TF-TG) ENSMUSG00000060961	false
3385	TF-TG	ENSMUSG00000034701 (TF-TG) ENSMUSG00000060063	false
3386	TF-TG	ENSMUSG00000034701 (TF-TG) ENSMUSG00000059713	false
3387	TF-TG	ENSMUSG00000034701 (TF-TG) ENSMUSG00000059708	false
3388	TF-TG	ENSMUSG00000034701 (TF-TG) ENSMUSG00000059013	false
3389	TF-TG	ENSMUSG00000034701 (TF-TG) ENSMUSG00000058975	false
3390	TF-TG	ENSMUSG00000034701 (TF-TG) ENSMUSG00000058799	false
3391	TF-TG	ENSMUSG00000034701 (TF-TG) ENSMUSG00000058740	false
3392	TF-TG	ENSMUSG00000034701 (TF-TG) ENSMUSG00000058297	false
3393	TF-TG	ENSMUSG00000034701 (TF-TG) ENSMUSG00000058145	false
3394	TF-TG	ENSMUSG00000034701 (TF-TG) ENSMUSG00000058063	false
3395	TF-TG	ENSMUSG00000034701 (TF-TG) ENSMUSG00000058006	false
3396	TF-TG	ENSMUSG00000034701 (TF-TG) ENSMUSG00000057933	false
3397	TF-TG	ENSMUSG00000034701 (TF-TG) ENSMUSG00000057614	false
3398	TF-TG	ENSMUSG00000034701 (TF-TG) ENSMUSG00000057604	false
3399	TF-TG	ENSMUSG00000034701 (TF-TG) ENSMUSG00000057406	false
3400	TF-TG	ENSMUSG00000034701 (TF-TG) ENSMUSG00000057182	false
3401	TF-TG	ENSMUSG00000034701 (TF-TG) ENSMUSG00000056222	false
3402	TF-TG	ENSMUSG00000034701 (TF-TG) ENSMUSG00000056185	false
3403	TF-TG	ENSMUSG00000034701 (TF-TG) ENSMUSG00000056069	false
3404	TF-TG	ENSMUSG00000034701 (TF-TG) ENSMUSG00000055980	false
3405	TF-TG	ENSMUSG00000034701 (TF-TG) ENSMUSG00000055745	false
3406	TF-TG	ENSMUSG00000034701 (TF-TG) ENSMUSG00000055612	false
3407	TF-TG	ENSMUSG00000034701 (TF-TG) ENSMUSG00000055485	false
3408	TF-TG	ENSMUSG00000034701 (TF-TG) ENSMUSG00000055407	false
3409	TF-TG	ENSMUSG00000034701 (TF-TG) ENSMUSG00000054764	false
3410	TF-TG	ENSMUSG00000034701 (TF-TG) ENSMUSG00000054717	false
3411	TF-TG	ENSMUSG00000034701 (TF-TG) ENSMUSG00000054640	false
3412	TF-TG	ENSMUSG00000034701 (TF-TG) ENSMUSG00000054582	false
3413	TF-TG	ENSMUSG00000034701 (TF-TG) ENSMUSG00000054484	false
3414	TF-TG	ENSMUSG00000034701 (TF-TG) ENSMUSG00000054342	false
3415	TF-TG	ENSMUSG00000034701 (TF-TG) ENSMUSG00000054200	false
3416	TF-TG	ENSMUSG00000034701 (TF-TG) ENSMUSG00000054034	false
3417	TF-TG	ENSMUSG00000034701 (TF-TG) ENSMUSG00000053963	false
3418	TF-TG	ENSMUSG00000034701 (TF-TG) ENSMUSG00000053783	false
3419	TF-TG	ENSMUSG00000034701 (TF-TG) ENSMUSG00000053765	false
3420	TF-TG	ENSMUSG00000034701 (TF-TG) ENSMUSG00000053617	false
3421	TF-TG	ENSMUSG00000034701 (TF-TG) ENSMUSG00000053414	false
3422	TF-TG	ENSMUSG00000034701 (TF-TG) ENSMUSG00000053334	false
3423	TF-TG	ENSMUSG00000034701 (TF-TG) ENSMUSG00000053219	false
3424	TF-TG	ENSMUSG00000034701 (TF-TG) ENSMUSG00000053046	false
3425	TF-TG	ENSMUSG00000034701 (TF-TG) ENSMUSG00000052384	false
3426	TF-TG	ENSMUSG00000034701 (TF-TG) ENSMUSG00000052135	false
3427	TF-TG	ENSMUSG00000034701 (TF-TG) ENSMUSG00000052117	false
3428	TF-TG	ENSMUSG00000034701 (TF-TG) ENSMUSG00000051980	false
3429	TF-TG	ENSMUSG00000034701 (TF-TG) ENSMUSG00000051951	false
3430	TF-TG	ENSMUSG00000034701 (TF-TG) ENSMUSG00000051344	false
3431	TF-TG	ENSMUSG00000034701 (TF-TG) ENSMUSG00000051335	false
3432	TF-TG	ENSMUSG00000034701 (TF-TG) ENSMUSG00000051314	false
3433	TF-TG	ENSMUSG00000034701 (TF-TG) ENSMUSG00000051278	false
3434	TF-TG	ENSMUSG00000034701 (TF-TG) ENSMUSG00000051251	false
3435	TF-TG	ENSMUSG00000034701 (TF-TG) ENSMUSG00000051220	false
3436	TF-TG	ENSMUSG00000034701 (TF-TG) ENSMUSG00000051209	false
3437	TF-TG	ENSMUSG00000034701 (TF-TG) ENSMUSG00000051079	false
3438	TF-TG	ENSMUSG00000034701 (TF-TG) ENSMUSG00000051043	false
3439	TF-TG	ENSMUSG00000034701 (TF-TG) ENSMUSG00000050824	false
3440	TF-TG	ENSMUSG00000034701 (TF-TG) ENSMUSG00000050822	false
3441	TF-TG	ENSMUSG00000034701 (TF-TG) ENSMUSG00000050711	false
3442	TF-TG	ENSMUSG00000034701 (TF-TG) ENSMUSG00000050473	false
3443	TF-TG	ENSMUSG00000034701 (TF-TG) ENSMUSG00000050410	false
3444	TF-TG	ENSMUSG00000034701 (TF-TG) ENSMUSG00000050359	false
3445	TF-TG	ENSMUSG00000034701 (TF-TG) ENSMUSG00000050335	false
3446	TF-TG	ENSMUSG00000034701 (TF-TG) ENSMUSG00000050321	false
3447	TF-TG	ENSMUSG00000034701 (TF-TG) ENSMUSG00000050064	false
3448	TF-TG	ENSMUSG00000034701 (TF-TG) ENSMUSG00000049892	false
3449	TF-TG	ENSMUSG00000034701 (TF-TG) ENSMUSG00000049723	false
3450	TF-TG	ENSMUSG00000034701 (TF-TG) ENSMUSG00000049350	false
3451	TF-TG	ENSMUSG00000034701 (TF-TG) ENSMUSG00000049288	false
3452	TF-TG	ENSMUSG00000034701 (TF-TG) ENSMUSG00000049154	false
3453	TF-TG	ENSMUSG00000034701 (TF-TG) ENSMUSG00000048970	false
3454	TF-TG	ENSMUSG00000034701 (TF-TG) ENSMUSG00000048911	false
3455	TF-TG	ENSMUSG00000034701 (TF-TG) ENSMUSG00000048329	false
3456	TF-TG	ENSMUSG00000034701 (TF-TG) ENSMUSG00000048058	false
3457	TF-TG	ENSMUSG00000034701 (TF-TG) ENSMUSG00000048022	false
3458	TF-TG	ENSMUSG00000034701 (TF-TG) ENSMUSG00000047996	false
3459	TF-TG	ENSMUSG00000034701 (TF-TG) ENSMUSG00000047963	false
3460	TF-TG	ENSMUSG00000034701 (TF-TG) ENSMUSG00000047907	false
3461	TF-TG	ENSMUSG00000034701 (TF-TG) ENSMUSG00000047730	false
3462	TF-TG	ENSMUSG00000034701 (TF-TG) ENSMUSG00000047642	false
3463	TF-TG	ENSMUSG00000034701 (TF-TG) ENSMUSG00000047534	false
3464	TF-TG	ENSMUSG00000034701 (TF-TG) ENSMUSG00000047507	false
3465	TF-TG	ENSMUSG00000034701 (TF-TG) ENSMUSG00000047501	false
3466	TF-TG	ENSMUSG00000034701 (TF-TG) ENSMUSG00000047344	false
3467	TF-TG	ENSMUSG00000034701 (TF-TG) ENSMUSG00000047230	false
3468	TF-TG	ENSMUSG00000034701 (TF-TG) ENSMUSG00000047205	false
3469	TF-TG	ENSMUSG00000034701 (TF-TG) ENSMUSG00000047139	false
3470	TF-TG	ENSMUSG00000034701 (TF-TG) ENSMUSG00000047115	false
3471	TF-TG	ENSMUSG00000034701 (TF-TG) ENSMUSG00000047044	false
3472	TF-TG	ENSMUSG00000034701 (TF-TG) ENSMUSG00000047003	false
3473	TF-TG	ENSMUSG00000034701 (TF-TG) ENSMUSG00000046668	false
3474	TF-TG	ENSMUSG00000034701 (TF-TG) ENSMUSG00000046613	false
3475	TF-TG	ENSMUSG00000034701 (TF-TG) ENSMUSG00000046591	false
3476	TF-TG	ENSMUSG00000034701 (TF-TG) ENSMUSG00000046589	false
3477	TF-TG	ENSMUSG00000034701 (TF-TG) ENSMUSG00000046546	false
3478	TF-TG	ENSMUSG00000034701 (TF-TG) ENSMUSG00000046447	false
3479	TF-TG	ENSMUSG00000034701 (TF-TG) ENSMUSG00000046215	false
3480	TF-TG	ENSMUSG00000034701 (TF-TG) ENSMUSG00000046070	false
3481	TF-TG	ENSMUSG00000034701 (TF-TG) ENSMUSG00000045912	false
3482	TF-TG	ENSMUSG00000034701 (TF-TG) ENSMUSG00000045838	false
3483	TF-TG	ENSMUSG00000034701 (TF-TG) ENSMUSG00000045817	false
3484	TF-TG	ENSMUSG00000034701 (TF-TG) ENSMUSG00000045790	false
3485	TF-TG	ENSMUSG00000034701 (TF-TG) ENSMUSG00000045165	false
3486	TF-TG	ENSMUSG00000034701 (TF-TG) ENSMUSG00000045007	false
3487	TF-TG	ENSMUSG00000034701 (TF-TG) ENSMUSG00000044933	false
3488	TF-TG	ENSMUSG00000034701 (TF-TG) ENSMUSG00000044921	false
3489	TF-TG	ENSMUSG00000034701 (TF-TG) ENSMUSG00000044860	false
3490	TF-TG	ENSMUSG00000034701 (TF-TG) ENSMUSG00000044626	false
3491	TF-TG	ENSMUSG00000034701 (TF-TG) ENSMUSG00000044548	false
3492	TF-TG	ENSMUSG00000034701 (TF-TG) ENSMUSG00000044453	false
3493	TF-TG	ENSMUSG00000034701 (TF-TG) ENSMUSG00000044313	false
3494	TF-TG	ENSMUSG00000034701 (TF-TG) ENSMUSG00000044072	false
3495	TF-TG	ENSMUSG00000034701 (TF-TG) ENSMUSG00000044066	false
3496	TF-TG	ENSMUSG00000034701 (TF-TG) ENSMUSG00000044017	false
3497	TF-TG	ENSMUSG00000034701 (TF-TG) ENSMUSG00000044005	false
3498	TF-TG	ENSMUSG00000034701 (TF-TG) ENSMUSG00000043518	false
3499	TF-TG	ENSMUSG00000034701 (TF-TG) ENSMUSG00000043461	false
3500	TF-TG	ENSMUSG00000034701 (TF-TG) ENSMUSG00000043391	false
3501	TF-TG	ENSMUSG00000034701 (TF-TG) ENSMUSG00000043154	false
3502	TF-TG	ENSMUSG00000034701 (TF-TG) ENSMUSG00000043088	false
3503	TF-TG	ENSMUSG00000034701 (TF-TG) ENSMUSG00000043068	false
3504	TF-TG	ENSMUSG00000034701 (TF-TG) ENSMUSG00000043004	false
3505	TF-TG	ENSMUSG00000034701 (TF-TG) ENSMUSG00000042763	false
3506	TF-TG	ENSMUSG00000034701 (TF-TG) ENSMUSG00000042734	false
3507	TF-TG	ENSMUSG00000034701 (TF-TG) ENSMUSG00000042684	false
3508	TF-TG	ENSMUSG00000034701 (TF-TG) ENSMUSG00000042631	false
3509	TF-TG	ENSMUSG00000034701 (TF-TG) ENSMUSG00000042462	false
3510	TF-TG	ENSMUSG00000034701 (TF-TG) ENSMUSG00000042429	false
3511	TF-TG	ENSMUSG00000034701 (TF-TG) ENSMUSG00000042371	false
3512	TF-TG	ENSMUSG00000034701 (TF-TG) ENSMUSG00000042258	false
3513	TF-TG	ENSMUSG00000034701 (TF-TG) ENSMUSG00000042215	false
3514	TF-TG	ENSMUSG00000034701 (TF-TG) ENSMUSG00000042213	false
3515	TF-TG	ENSMUSG00000034701 (TF-TG) ENSMUSG00000042115	false
3516	TF-TG	ENSMUSG00000034701 (TF-TG) ENSMUSG00000041836	false
3517	TF-TG	ENSMUSG00000034701 (TF-TG) ENSMUSG00000041798	false
3518	TF-TG	ENSMUSG00000034701 (TF-TG) ENSMUSG00000041729	false
3519	TF-TG	ENSMUSG00000034701 (TF-TG) ENSMUSG00000041658	false
3520	TF-TG	ENSMUSG00000034701 (TF-TG) ENSMUSG00000041608	false
3521	TF-TG	ENSMUSG00000034701 (TF-TG) ENSMUSG00000041498	false
3522	TF-TG	ENSMUSG00000034701 (TF-TG) ENSMUSG00000041439	false
3523	TF-TG	ENSMUSG00000034701 (TF-TG) ENSMUSG00000041351	false
3524	TF-TG	ENSMUSG00000034701 (TF-TG) ENSMUSG00000041293	false
3525	TF-TG	ENSMUSG00000034701 (TF-TG) ENSMUSG00000041141	false
3526	TF-TG	ENSMUSG00000034701 (TF-TG) ENSMUSG00000041117	false
3527	TF-TG	ENSMUSG00000034701 (TF-TG) ENSMUSG00000041064	false
3528	TF-TG	ENSMUSG00000034701 (TF-TG) ENSMUSG00000041000	false
3529	TF-TG	ENSMUSG00000034701 (TF-TG) ENSMUSG00000040860	false
3530	TF-TG	ENSMUSG00000034701 (TF-TG) ENSMUSG00000040856	false
3531	TF-TG	ENSMUSG00000034701 (TF-TG) ENSMUSG00000040852	false
3532	TF-TG	ENSMUSG00000034701 (TF-TG) ENSMUSG00000040543	false
3533	TF-TG	ENSMUSG00000034701 (TF-TG) ENSMUSG00000040495	false
3534	TF-TG	ENSMUSG00000034701 (TF-TG) ENSMUSG00000040483	false
3535	TF-TG	ENSMUSG00000034701 (TF-TG) ENSMUSG00000040462	false
3536	TF-TG	ENSMUSG00000034701 (TF-TG) ENSMUSG00000040389	false
3537	TF-TG	ENSMUSG00000034701 (TF-TG) ENSMUSG00000040209	false
3538	TF-TG	ENSMUSG00000034701 (TF-TG) ENSMUSG00000040170	false
3539	TF-TG	ENSMUSG00000034701 (TF-TG) ENSMUSG00000040136	false
3540	TF-TG	ENSMUSG00000034701 (TF-TG) ENSMUSG00000040061	false
3541	TF-TG	ENSMUSG00000034701 (TF-TG) ENSMUSG00000040046	false
3542	TF-TG	ENSMUSG00000034701 (TF-TG) ENSMUSG00000040016	false
3543	TF-TG	ENSMUSG00000034701 (TF-TG) ENSMUSG00000039943	false
3544	TF-TG	ENSMUSG00000034701 (TF-TG) ENSMUSG00000039934	false
3545	TF-TG	ENSMUSG00000034701 (TF-TG) ENSMUSG00000039831	false
3546	TF-TG	ENSMUSG00000034701 (TF-TG) ENSMUSG00000039683	false
3547	TF-TG	ENSMUSG00000034701 (TF-TG) ENSMUSG00000039676	false
3548	TF-TG	ENSMUSG00000034701 (TF-TG) ENSMUSG00000039621	false
3549	TF-TG	ENSMUSG00000034701 (TF-TG) ENSMUSG00000039395	false
3550	TF-TG	ENSMUSG00000034701 (TF-TG) ENSMUSG00000039384	false
3551	TF-TG	ENSMUSG00000034701 (TF-TG) ENSMUSG00000039372	false
3552	TF-TG	ENSMUSG00000034701 (TF-TG) ENSMUSG00000039270	false
3553	TF-TG	ENSMUSG00000034701 (TF-TG) ENSMUSG00000039234	false
3554	TF-TG	ENSMUSG00000034701 (TF-TG) ENSMUSG00000039168	false
3555	TF-TG	ENSMUSG00000034701 (TF-TG) ENSMUSG00000039157	false
3556	TF-TG	ENSMUSG00000034701 (TF-TG) ENSMUSG00000039145	false
3557	TF-TG	ENSMUSG00000034701 (TF-TG) ENSMUSG00000039115	false
3558	TF-TG	ENSMUSG00000034701 (TF-TG) ENSMUSG00000039050	false
3559	TF-TG	ENSMUSG00000034701 (TF-TG) ENSMUSG00000038903	false
3560	TF-TG	ENSMUSG00000034701 (TF-TG) ENSMUSG00000038836	false
3561	TF-TG	ENSMUSG00000034701 (TF-TG) ENSMUSG00000038777	false
3562	TF-TG	ENSMUSG00000034701 (TF-TG) ENSMUSG00000038599	false
3563	TF-TG	ENSMUSG00000034701 (TF-TG) ENSMUSG00000038580	false
3564	TF-TG	ENSMUSG00000034701 (TF-TG) ENSMUSG00000038530	false
3565	TF-TG	ENSMUSG00000034701 (TF-TG) ENSMUSG00000038456	false
3566	TF-TG	ENSMUSG00000034701 (TF-TG) ENSMUSG00000038451	false
3567	TF-TG	ENSMUSG00000034701 (TF-TG) ENSMUSG00000038379	false
3568	TF-TG	ENSMUSG00000034701 (TF-TG) ENSMUSG00000038349	false
3569	TF-TG	ENSMUSG00000034701 (TF-TG) ENSMUSG00000038312	false
3570	TF-TG	ENSMUSG00000034701 (TF-TG) ENSMUSG00000038255	false
3571	TF-TG	ENSMUSG00000034701 (TF-TG) ENSMUSG00000038209	false
3572	TF-TG	ENSMUSG00000034701 (TF-TG) ENSMUSG00000038146	false
3573	TF-TG	ENSMUSG00000034701 (TF-TG) ENSMUSG00000037942	false
3574	TF-TG	ENSMUSG00000034701 (TF-TG) ENSMUSG00000037762	false
3575	TF-TG	ENSMUSG00000034701 (TF-TG) ENSMUSG00000037664	false
3576	TF-TG	ENSMUSG00000034701 (TF-TG) ENSMUSG00000037643	false
3577	TF-TG	ENSMUSG00000034701 (TF-TG) ENSMUSG00000037628	false
3578	TF-TG	ENSMUSG00000034701 (TF-TG) ENSMUSG00000037624	false
3579	TF-TG	ENSMUSG00000034701 (TF-TG) ENSMUSG00000037621	false
3580	TF-TG	ENSMUSG00000034701 (TF-TG) ENSMUSG00000037606	false
3581	TF-TG	ENSMUSG00000034701 (TF-TG) ENSMUSG00000037580	false
3582	TF-TG	ENSMUSG00000034701 (TF-TG) ENSMUSG00000037306	false
3583	TF-TG	ENSMUSG00000034701 (TF-TG) ENSMUSG00000037235	false
3584	TF-TG	ENSMUSG00000034701 (TF-TG) ENSMUSG00000037159	false
3585	TF-TG	ENSMUSG00000034701 (TF-TG) ENSMUSG00000037106	false
3586	TF-TG	ENSMUSG00000034701 (TF-TG) ENSMUSG00000036995	false
3587	TF-TG	ENSMUSG00000034701 (TF-TG) ENSMUSG00000036915	false
3588	TF-TG	ENSMUSG00000034701 (TF-TG) ENSMUSG00000036913	false
3589	TF-TG	ENSMUSG00000034701 (TF-TG) ENSMUSG00000036887	false
3590	TF-TG	ENSMUSG00000034701 (TF-TG) ENSMUSG00000036777	false
3591	TF-TG	ENSMUSG00000034701 (TF-TG) ENSMUSG00000036437	false
3592	TF-TG	ENSMUSG00000034701 (TF-TG) ENSMUSG00000036327	false
3593	TF-TG	ENSMUSG00000034701 (TF-TG) ENSMUSG00000036225	false
3594	TF-TG	ENSMUSG00000034701 (TF-TG) ENSMUSG00000036223	false
3595	TF-TG	ENSMUSG00000034701 (TF-TG) ENSMUSG00000036181	false
3596	TF-TG	ENSMUSG00000034701 (TF-TG) ENSMUSG00000036053	false
3597	TF-TG	ENSMUSG00000034701 (TF-TG) ENSMUSG00000035930	false
3598	TF-TG	ENSMUSG00000034701 (TF-TG) ENSMUSG00000035849	false
3599	TF-TG	ENSMUSG00000034701 (TF-TG) ENSMUSG00000035847	false
3600	TF-TG	ENSMUSG00000034701 (TF-TG) ENSMUSG00000035606	false
3601	TF-TG	ENSMUSG00000034701 (TF-TG) ENSMUSG00000035561	false
3602	TF-TG	ENSMUSG00000034701 (TF-TG) ENSMUSG00000035506	false
3603	TF-TG	ENSMUSG00000034701 (TF-TG) ENSMUSG00000035486	false
3604	TF-TG	ENSMUSG00000034701 (TF-TG) ENSMUSG00000035431	false
3605	TF-TG	ENSMUSG00000034701 (TF-TG) ENSMUSG00000035277	false
3606	TF-TG	ENSMUSG00000034701 (TF-TG) ENSMUSG00000035273	false
3607	TF-TG	ENSMUSG00000034701 (TF-TG) ENSMUSG00000035164	false
3608	TF-TG	ENSMUSG00000034701 (TF-TG) ENSMUSG00000035095	false
3609	TF-TG	ENSMUSG00000034701 (TF-TG) ENSMUSG00000034883	false
3610	TF-TG	ENSMUSG00000034701 (TF-TG) ENSMUSG00000034785	false
3611	TF-TG	ENSMUSG00000034701 (TF-TG) ENSMUSG00000034774	false
3612	TF-TG	ENSMUSG00000034701 (TF-TG) ENSMUSG00000034773	false
3613	TF-TG	ENSMUSG00000034701 (TF-TG) ENSMUSG00000034768	false
3614	TF-TG	ENSMUSG00000034701 (TF-TG) ENSMUSG00000034758	false
3615	TF-TG	ENSMUSG00000034701 (TF-TG) ENSMUSG00000034586	false
3616	TF-TG	ENSMUSG00000034701 (TF-TG) ENSMUSG00000034528	false
3617	TF-TG	ENSMUSG00000034701 (TF-TG) ENSMUSG00000034472	false
3618	TF-TG	ENSMUSG00000034701 (TF-TG) ENSMUSG00000034116	false
3619	TF-TG	ENSMUSG00000034701 (TF-TG) ENSMUSG00000033917	false
3620	TF-TG	ENSMUSG00000034701 (TF-TG) ENSMUSG00000033752	false
3621	TF-TG	ENSMUSG00000034701 (TF-TG) ENSMUSG00000033740	false
3622	TF-TG	ENSMUSG00000034701 (TF-TG) ENSMUSG00000033530	false
3623	TF-TG	ENSMUSG00000034701 (TF-TG) ENSMUSG00000033307	false
3624	TF-TG	ENSMUSG00000034701 (TF-TG) ENSMUSG00000033287	false
3625	TF-TG	ENSMUSG00000034701 (TF-TG) ENSMUSG00000033222	false
3626	TF-TG	ENSMUSG00000034701 (TF-TG) ENSMUSG00000033177	false
3627	TF-TG	ENSMUSG00000034701 (TF-TG) ENSMUSG00000033061	false
3628	TF-TG	ENSMUSG00000034701 (TF-TG) ENSMUSG00000033022	false
3629	TF-TG	ENSMUSG00000034701 (TF-TG) ENSMUSG00000032978	false
3630	TF-TG	ENSMUSG00000034701 (TF-TG) ENSMUSG00000032965	false
3631	TF-TG	ENSMUSG00000034701 (TF-TG) ENSMUSG00000032932	false
3632	TF-TG	ENSMUSG00000034701 (TF-TG) ENSMUSG00000032769	false
3633	TF-TG	ENSMUSG00000034701 (TF-TG) ENSMUSG00000032640	false
3634	TF-TG	ENSMUSG00000034701 (TF-TG) ENSMUSG00000032625	false
3635	TF-TG	ENSMUSG00000034701 (TF-TG) ENSMUSG00000032564	false
3636	TF-TG	ENSMUSG00000034701 (TF-TG) ENSMUSG00000032507	false
3637	TF-TG	ENSMUSG00000034701 (TF-TG) ENSMUSG00000032400	false
3638	TF-TG	ENSMUSG00000034701 (TF-TG) ENSMUSG00000032353	false
3639	TF-TG	ENSMUSG00000034701 (TF-TG) ENSMUSG00000032350	false
3640	TF-TG	ENSMUSG00000034701 (TF-TG) ENSMUSG00000032338	false
3641	TF-TG	ENSMUSG00000034701 (TF-TG) ENSMUSG00000032315	false
3642	TF-TG	ENSMUSG00000034701 (TF-TG) ENSMUSG00000032297	false
3643	TF-TG	ENSMUSG00000034701 (TF-TG) ENSMUSG00000032254	false
3644	TF-TG	ENSMUSG00000034701 (TF-TG) ENSMUSG00000032238	false
3645	TF-TG	ENSMUSG00000034701 (TF-TG) ENSMUSG00000032232	false
3646	TF-TG	ENSMUSG00000034701 (TF-TG) ENSMUSG00000032226	false
3647	TF-TG	ENSMUSG00000034701 (TF-TG) ENSMUSG00000032181	false
3648	TF-TG	ENSMUSG00000034701 (TF-TG) ENSMUSG00000032076	false
3649	TF-TG	ENSMUSG00000034701 (TF-TG) ENSMUSG00000032034	false
3650	TF-TG	ENSMUSG00000034701 (TF-TG) ENSMUSG00000031957	false
3651	TF-TG	ENSMUSG00000034701 (TF-TG) ENSMUSG00000031903	false
3652	TF-TG	ENSMUSG00000034701 (TF-TG) ENSMUSG00000031790	false
3653	TF-TG	ENSMUSG00000034701 (TF-TG) ENSMUSG00000031778	false
3654	TF-TG	ENSMUSG00000034701 (TF-TG) ENSMUSG00000031760	false
3655	TF-TG	ENSMUSG00000034701 (TF-TG) ENSMUSG00000031756	false
3656	TF-TG	ENSMUSG00000034701 (TF-TG) ENSMUSG00000031730	false
3657	TF-TG	ENSMUSG00000034701 (TF-TG) ENSMUSG00000031668	false
3658	TF-TG	ENSMUSG00000034701 (TF-TG) ENSMUSG00000031635	false
3659	TF-TG	ENSMUSG00000034701 (TF-TG) ENSMUSG00000031629	false
3660	TF-TG	ENSMUSG00000034701 (TF-TG) ENSMUSG00000031626	false
3661	TF-TG	ENSMUSG00000034701 (TF-TG) ENSMUSG00000031562	false
3662	TF-TG	ENSMUSG00000034701 (TF-TG) ENSMUSG00000031558	false
3663	TF-TG	ENSMUSG00000034701 (TF-TG) ENSMUSG00000031532	false
3664	TF-TG	ENSMUSG00000034701 (TF-TG) ENSMUSG00000031453	false
3665	TF-TG	ENSMUSG00000034701 (TF-TG) ENSMUSG00000031448	false
3666	TF-TG	ENSMUSG00000034701 (TF-TG) ENSMUSG00000031367	false
3667	TF-TG	ENSMUSG00000034701 (TF-TG) ENSMUSG00000031173	false
3668	TF-TG	ENSMUSG00000034701 (TF-TG) ENSMUSG00000031004	false
3669	TF-TG	ENSMUSG00000034701 (TF-TG) ENSMUSG00000030866	false
3670	TF-TG	ENSMUSG00000034701 (TF-TG) ENSMUSG00000030787	false
3671	TF-TG	ENSMUSG00000034701 (TF-TG) ENSMUSG00000030717	false
3672	TF-TG	ENSMUSG00000034701 (TF-TG) ENSMUSG00000030659	false
3673	TF-TG	ENSMUSG00000034701 (TF-TG) ENSMUSG00000030543	false
3674	TF-TG	ENSMUSG00000034701 (TF-TG) ENSMUSG00000030483	false
3675	TF-TG	ENSMUSG00000034701 (TF-TG) ENSMUSG00000030411	false
3676	TF-TG	ENSMUSG00000034701 (TF-TG) ENSMUSG00000030346	false
3677	TF-TG	ENSMUSG00000034701 (TF-TG) ENSMUSG00000030329	false
3678	TF-TG	ENSMUSG00000034701 (TF-TG) ENSMUSG00000030199	false
3679	TF-TG	ENSMUSG00000034701 (TF-TG) ENSMUSG00000030110	false
3680	TF-TG	ENSMUSG00000034701 (TF-TG) ENSMUSG00000030107	false
3681	TF-TG	ENSMUSG00000034701 (TF-TG) ENSMUSG00000030029	false
3682	TF-TG	ENSMUSG00000034701 (TF-TG) ENSMUSG00000029847	false
3683	TF-TG	ENSMUSG00000034701 (TF-TG) ENSMUSG00000029765	false
3684	TF-TG	ENSMUSG00000034701 (TF-TG) ENSMUSG00000029762	false
3685	TF-TG	ENSMUSG00000034701 (TF-TG) ENSMUSG00000029712	false
3686	TF-TG	ENSMUSG00000034701 (TF-TG) ENSMUSG00000029706	false
3687	TF-TG	ENSMUSG00000034701 (TF-TG) ENSMUSG00000029650	false
3688	TF-TG	ENSMUSG00000034701 (TF-TG) ENSMUSG00000029601	false
3689	TF-TG	ENSMUSG00000034701 (TF-TG) ENSMUSG00000029591	false
3690	TF-TG	ENSMUSG00000034701 (TF-TG) ENSMUSG00000029521	false
3691	TF-TG	ENSMUSG00000034701 (TF-TG) ENSMUSG00000029516	false
3692	TF-TG	ENSMUSG00000034701 (TF-TG) ENSMUSG00000029470	false
3693	TF-TG	ENSMUSG00000034701 (TF-TG) ENSMUSG00000029420	false
3694	TF-TG	ENSMUSG00000034701 (TF-TG) ENSMUSG00000029408	false
3695	TF-TG	ENSMUSG00000034701 (TF-TG) ENSMUSG00000029163	false
3696	TF-TG	ENSMUSG00000034701 (TF-TG) ENSMUSG00000029101	false
3697	TF-TG	ENSMUSG00000034701 (TF-TG) ENSMUSG00000028986	false
3698	TF-TG	ENSMUSG00000034701 (TF-TG) ENSMUSG00000028909	false
3699	TF-TG	ENSMUSG00000034701 (TF-TG) ENSMUSG00000028884	false
3700	TF-TG	ENSMUSG00000034701 (TF-TG) ENSMUSG00000028874	false
3701	TF-TG	ENSMUSG00000034701 (TF-TG) ENSMUSG00000028825	false
3702	TF-TG	ENSMUSG00000034701 (TF-TG) ENSMUSG00000028785	false
3703	TF-TG	ENSMUSG00000034701 (TF-TG) ENSMUSG00000028766	false
3704	TF-TG	ENSMUSG00000034701 (TF-TG) ENSMUSG00000028763	false
3705	TF-TG	ENSMUSG00000034701 (TF-TG) ENSMUSG00000028718	false
3706	TF-TG	ENSMUSG00000034701 (TF-TG) ENSMUSG00000028702	false
3707	TF-TG	ENSMUSG00000034701 (TF-TG) ENSMUSG00000028634	false
3708	TF-TG	ENSMUSG00000034701 (TF-TG) ENSMUSG00000028633	false
3709	TF-TG	ENSMUSG00000034701 (TF-TG) ENSMUSG00000028614	false
3710	TF-TG	ENSMUSG00000034701 (TF-TG) ENSMUSG00000028602	false
3711	TF-TG	ENSMUSG00000034701 (TF-TG) ENSMUSG00000028573	false
3712	TF-TG	ENSMUSG00000034701 (TF-TG) ENSMUSG00000028560	false
3713	TF-TG	ENSMUSG00000034701 (TF-TG) ENSMUSG00000028555	false
3714	TF-TG	ENSMUSG00000034701 (TF-TG) ENSMUSG00000028438	false
3715	TF-TG	ENSMUSG00000034701 (TF-TG) ENSMUSG00000028415	false
3716	TF-TG	ENSMUSG00000034701 (TF-TG) ENSMUSG00000028391	false
3717	TF-TG	ENSMUSG00000034701 (TF-TG) ENSMUSG00000028356	false
3718	TF-TG	ENSMUSG00000034701 (TF-TG) ENSMUSG00000028341	false
3719	TF-TG	ENSMUSG00000034701 (TF-TG) ENSMUSG00000028312	false
3720	TF-TG	ENSMUSG00000034701 (TF-TG) ENSMUSG00000028289	false
3721	TF-TG	ENSMUSG00000034701 (TF-TG) ENSMUSG00000028282	false
3722	TF-TG	ENSMUSG00000034701 (TF-TG) ENSMUSG00000028186	false
3723	TF-TG	ENSMUSG00000034701 (TF-TG) ENSMUSG00000028088	false
3724	TF-TG	ENSMUSG00000034701 (TF-TG) ENSMUSG00000028057	false
3725	TF-TG	ENSMUSG00000034701 (TF-TG) ENSMUSG00000027878	false
3726	TF-TG	ENSMUSG00000034701 (TF-TG) ENSMUSG00000027834	false
3727	TF-TG	ENSMUSG00000034701 (TF-TG) ENSMUSG00000027801	false
3728	TF-TG	ENSMUSG00000034701 (TF-TG) ENSMUSG00000027674	false
3729	TF-TG	ENSMUSG00000034701 (TF-TG) ENSMUSG00000027661	false
3730	TF-TG	ENSMUSG00000034701 (TF-TG) ENSMUSG00000027654	false
3731	TF-TG	ENSMUSG00000034701 (TF-TG) ENSMUSG00000027533	false
3732	TF-TG	ENSMUSG00000034701 (TF-TG) ENSMUSG00000027524	false
3733	TF-TG	ENSMUSG00000034701 (TF-TG) ENSMUSG00000027469	false
3734	TF-TG	ENSMUSG00000034701 (TF-TG) ENSMUSG00000027435	false
3735	TF-TG	ENSMUSG00000034701 (TF-TG) ENSMUSG00000027381	false
3736	TF-TG	ENSMUSG00000034701 (TF-TG) ENSMUSG00000027350	false
3737	TF-TG	ENSMUSG00000034701 (TF-TG) ENSMUSG00000027326	false
3738	TF-TG	ENSMUSG00000034701 (TF-TG) ENSMUSG00000027273	false
3739	TF-TG	ENSMUSG00000034701 (TF-TG) ENSMUSG00000027249	false
3740	TF-TG	ENSMUSG00000034701 (TF-TG) ENSMUSG00000027230	false
3741	TF-TG	ENSMUSG00000034701 (TF-TG) ENSMUSG00000027203	false
3742	TF-TG	ENSMUSG00000034701 (TF-TG) ENSMUSG00000027168	false
3743	TF-TG	ENSMUSG00000034701 (TF-TG) ENSMUSG00000027075	false
3744	TF-TG	ENSMUSG00000034701 (TF-TG) ENSMUSG00000027018	false
3745	TF-TG	ENSMUSG00000034701 (TF-TG) ENSMUSG00000027006	false
3746	TF-TG	ENSMUSG00000034701 (TF-TG) ENSMUSG00000026930	false
3747	TF-TG	ENSMUSG00000034701 (TF-TG) ENSMUSG00000026923	false
3748	TF-TG	ENSMUSG00000034701 (TF-TG) ENSMUSG00000026879	false
3749	TF-TG	ENSMUSG00000034701 (TF-TG) ENSMUSG00000026815	false
3750	TF-TG	ENSMUSG00000034701 (TF-TG) ENSMUSG00000026786	false
3751	TF-TG	ENSMUSG00000034701 (TF-TG) ENSMUSG00000026785	false
3752	TF-TG	ENSMUSG00000034701 (TF-TG) ENSMUSG00000026764	false
3753	TF-TG	ENSMUSG00000034701 (TF-TG) ENSMUSG00000026726	false
3754	TF-TG	ENSMUSG00000034701 (TF-TG) ENSMUSG00000026686	false
3755	TF-TG	ENSMUSG00000034701 (TF-TG) ENSMUSG00000026683	false
3756	TF-TG	ENSMUSG00000034701 (TF-TG) ENSMUSG00000026520	false
3757	TF-TG	ENSMUSG00000034701 (TF-TG) ENSMUSG00000026483	false
3758	TF-TG	ENSMUSG00000034701 (TF-TG) ENSMUSG00000026480	false
3759	TF-TG	ENSMUSG00000034701 (TF-TG) ENSMUSG00000026432	false
3760	TF-TG	ENSMUSG00000034701 (TF-TG) ENSMUSG00000026429	false
3761	TF-TG	ENSMUSG00000034701 (TF-TG) ENSMUSG00000026355	false
3762	TF-TG	ENSMUSG00000034701 (TF-TG) ENSMUSG00000026223	false
3763	TF-TG	ENSMUSG00000034701 (TF-TG) ENSMUSG00000026072	false
3764	TF-TG	ENSMUSG00000034701 (TF-TG) ENSMUSG00000025969	false
3765	TF-TG	ENSMUSG00000034701 (TF-TG) ENSMUSG00000025876	false
3766	TF-TG	ENSMUSG00000034701 (TF-TG) ENSMUSG00000025867	false
3767	TF-TG	ENSMUSG00000034701 (TF-TG) ENSMUSG00000025602	false
3768	TF-TG	ENSMUSG00000034701 (TF-TG) ENSMUSG00000025584	false
3769	TF-TG	ENSMUSG00000034701 (TF-TG) ENSMUSG00000025352	false
3770	TF-TG	ENSMUSG00000034701 (TF-TG) ENSMUSG00000025351	false
3771	TF-TG	ENSMUSG00000034701 (TF-TG) ENSMUSG00000025329	false
3772	TF-TG	ENSMUSG00000034701 (TF-TG) ENSMUSG00000025175	false
3773	TF-TG	ENSMUSG00000034701 (TF-TG) ENSMUSG00000025154	false
3774	TF-TG	ENSMUSG00000034701 (TF-TG) ENSMUSG00000025089	false
3775	TF-TG	ENSMUSG00000034701 (TF-TG) ENSMUSG00000024978	false
3776	TF-TG	ENSMUSG00000034701 (TF-TG) ENSMUSG00000024897	false
3777	TF-TG	ENSMUSG00000034701 (TF-TG) ENSMUSG00000024827	false
3778	TF-TG	ENSMUSG00000034701 (TF-TG) ENSMUSG00000024810	false
3779	TF-TG	ENSMUSG00000034701 (TF-TG) ENSMUSG00000024777	false
3780	TF-TG	ENSMUSG00000034701 (TF-TG) ENSMUSG00000024743	false
3781	TF-TG	ENSMUSG00000034701 (TF-TG) ENSMUSG00000024646	false
3782	TF-TG	ENSMUSG00000034701 (TF-TG) ENSMUSG00000024644	false
3783	TF-TG	ENSMUSG00000034701 (TF-TG) ENSMUSG00000024597	false
3784	TF-TG	ENSMUSG00000034701 (TF-TG) ENSMUSG00000024590	false
3785	TF-TG	ENSMUSG00000034701 (TF-TG) ENSMUSG00000024575	false
3786	TF-TG	ENSMUSG00000034701 (TF-TG) ENSMUSG00000024553	false
3787	TF-TG	ENSMUSG00000034701 (TF-TG) ENSMUSG00000024548	false
3788	TF-TG	ENSMUSG00000034701 (TF-TG) ENSMUSG00000024525	false
3789	TF-TG	ENSMUSG00000034701 (TF-TG) ENSMUSG00000024516	false
3790	TF-TG	ENSMUSG00000034701 (TF-TG) ENSMUSG00000024386	false
3791	TF-TG	ENSMUSG00000034701 (TF-TG) ENSMUSG00000024366	false
3792	TF-TG	ENSMUSG00000034701 (TF-TG) ENSMUSG00000024301	false
3793	TF-TG	ENSMUSG00000034701 (TF-TG) ENSMUSG00000024299	false
3794	TF-TG	ENSMUSG00000034701 (TF-TG) ENSMUSG00000024232	false
3795	TF-TG	ENSMUSG00000034701 (TF-TG) ENSMUSG00000024175	false
3796	TF-TG	ENSMUSG00000034701 (TF-TG) ENSMUSG00000024112	false
3797	TF-TG	ENSMUSG00000034701 (TF-TG) ENSMUSG00000024063	false
3798	TF-TG	ENSMUSG00000034701 (TF-TG) ENSMUSG00000024030	false
3799	TF-TG	ENSMUSG00000034701 (TF-TG) ENSMUSG00000024029	false
3800	TF-TG	ENSMUSG00000034701 (TF-TG) ENSMUSG00000023908	false
3801	TF-TG	ENSMUSG00000034701 (TF-TG) ENSMUSG00000023827	false
3802	TF-TG	ENSMUSG00000034701 (TF-TG) ENSMUSG00000023473	false
3803	TF-TG	ENSMUSG00000034701 (TF-TG) ENSMUSG00000023387	false
3804	TF-TG	ENSMUSG00000034701 (TF-TG) ENSMUSG00000023272	false
3805	TF-TG	ENSMUSG00000034701 (TF-TG) ENSMUSG00000023247	false
3806	TF-TG	ENSMUSG00000034701 (TF-TG) ENSMUSG00000023224	false
3807	TF-TG	ENSMUSG00000034701 (TF-TG) ENSMUSG00000023078	false
3808	TF-TG	ENSMUSG00000034701 (TF-TG) ENSMUSG00000023050	false
3809	TF-TG	ENSMUSG00000034701 (TF-TG) ENSMUSG00000023017	false
3810	TF-TG	ENSMUSG00000034701 (TF-TG) ENSMUSG00000023009	false
3811	TF-TG	ENSMUSG00000034701 (TF-TG) ENSMUSG00000023008	false
3812	TF-TG	ENSMUSG00000034701 (TF-TG) ENSMUSG00000022945	false
3813	TF-TG	ENSMUSG00000034701 (TF-TG) ENSMUSG00000022864	false
3814	TF-TG	ENSMUSG00000034701 (TF-TG) ENSMUSG00000022844	false
3815	TF-TG	ENSMUSG00000034701 (TF-TG) ENSMUSG00000022840	false
3816	TF-TG	ENSMUSG00000034701 (TF-TG) ENSMUSG00000022829	false
3817	TF-TG	ENSMUSG00000034701 (TF-TG) ENSMUSG00000022748	false
3818	TF-TG	ENSMUSG00000034701 (TF-TG) ENSMUSG00000022705	false
3819	TF-TG	ENSMUSG00000034701 (TF-TG) ENSMUSG00000022673	false
3820	TF-TG	ENSMUSG00000034701 (TF-TG) ENSMUSG00000022619	false
3821	TF-TG	ENSMUSG00000034701 (TF-TG) ENSMUSG00000022528	false
3822	TF-TG	ENSMUSG00000034701 (TF-TG) ENSMUSG00000022456	false
3823	TF-TG	ENSMUSG00000034701 (TF-TG) ENSMUSG00000022385	false
3824	TF-TG	ENSMUSG00000034701 (TF-TG) ENSMUSG00000022360	false
3825	TF-TG	ENSMUSG00000034701 (TF-TG) ENSMUSG00000022332	false
3826	TF-TG	ENSMUSG00000034701 (TF-TG) ENSMUSG00000022211	false
3827	TF-TG	ENSMUSG00000034701 (TF-TG) ENSMUSG00000022177	false
3828	TF-TG	ENSMUSG00000034701 (TF-TG) ENSMUSG00000022033	false
3829	TF-TG	ENSMUSG00000034701 (TF-TG) ENSMUSG00000022026	false
3830	TF-TG	ENSMUSG00000034701 (TF-TG) ENSMUSG00000022021	false
3831	TF-TG	ENSMUSG00000034701 (TF-TG) ENSMUSG00000021876	false
3832	TF-TG	ENSMUSG00000034701 (TF-TG) ENSMUSG00000021831	false
3833	TF-TG	ENSMUSG00000034701 (TF-TG) ENSMUSG00000021811	false
3834	TF-TG	ENSMUSG00000034701 (TF-TG) ENSMUSG00000021720	false
3835	TF-TG	ENSMUSG00000034701 (TF-TG) ENSMUSG00000021604	false
3836	TF-TG	ENSMUSG00000034701 (TF-TG) ENSMUSG00000021572	false
3837	TF-TG	ENSMUSG00000034701 (TF-TG) ENSMUSG00000021453	false
3838	TF-TG	ENSMUSG00000034701 (TF-TG) ENSMUSG00000021391	false
3839	TF-TG	ENSMUSG00000034701 (TF-TG) ENSMUSG00000021337	false
3840	TF-TG	ENSMUSG00000034701 (TF-TG) ENSMUSG00000021303	false
3841	TF-TG	ENSMUSG00000034701 (TF-TG) ENSMUSG00000021281	false
3842	TF-TG	ENSMUSG00000034701 (TF-TG) ENSMUSG00000021221	false
3843	TF-TG	ENSMUSG00000034701 (TF-TG) ENSMUSG00000021194	false
3844	TF-TG	ENSMUSG00000034701 (TF-TG) ENSMUSG00000021115	false
3845	TF-TG	ENSMUSG00000034701 (TF-TG) ENSMUSG00000021061	false
3846	TF-TG	ENSMUSG00000034701 (TF-TG) ENSMUSG00000021013	false
3847	TF-TG	ENSMUSG00000034701 (TF-TG) ENSMUSG00000020953	false
3848	TF-TG	ENSMUSG00000034701 (TF-TG) ENSMUSG00000020914	false
3849	TF-TG	ENSMUSG00000034701 (TF-TG) ENSMUSG00000020900	false
3850	TF-TG	ENSMUSG00000034701 (TF-TG) ENSMUSG00000020897	false
3851	TF-TG	ENSMUSG00000034701 (TF-TG) ENSMUSG00000020873	false
3852	TF-TG	ENSMUSG00000034701 (TF-TG) ENSMUSG00000020846	false
3853	TF-TG	ENSMUSG00000034701 (TF-TG) ENSMUSG00000020814	false
3854	TF-TG	ENSMUSG00000034701 (TF-TG) ENSMUSG00000020741	false
3855	TF-TG	ENSMUSG00000034701 (TF-TG) ENSMUSG00000020732	false
3856	TF-TG	ENSMUSG00000034701 (TF-TG) ENSMUSG00000020668	false
3857	TF-TG	ENSMUSG00000034701 (TF-TG) ENSMUSG00000020649	false
3858	TF-TG	ENSMUSG00000034701 (TF-TG) ENSMUSG00000020641	false
3859	TF-TG	ENSMUSG00000034701 (TF-TG) ENSMUSG00000020577	false
3860	TF-TG	ENSMUSG00000034701 (TF-TG) ENSMUSG00000020576	false
3861	TF-TG	ENSMUSG00000034701 (TF-TG) ENSMUSG00000020472	false
3862	TF-TG	ENSMUSG00000034701 (TF-TG) ENSMUSG00000020462	false
3863	TF-TG	ENSMUSG00000034701 (TF-TG) ENSMUSG00000020261	false
3864	TF-TG	ENSMUSG00000034701 (TF-TG) ENSMUSG00000020226	false
3865	TF-TG	ENSMUSG00000034701 (TF-TG) ENSMUSG00000020185	false
3866	TF-TG	ENSMUSG00000034701 (TF-TG) ENSMUSG00000020143	false
3867	TF-TG	ENSMUSG00000034701 (TF-TG) ENSMUSG00000020121	false
3868	TF-TG	ENSMUSG00000034701 (TF-TG) ENSMUSG00000020034	false
3869	TF-TG	ENSMUSG00000034701 (TF-TG) ENSMUSG00000020019	false
3870	TF-TG	ENSMUSG00000034701 (TF-TG) ENSMUSG00000019947	false
3871	TF-TG	ENSMUSG00000034701 (TF-TG) ENSMUSG00000019945	false
3872	TF-TG	ENSMUSG00000034701 (TF-TG) ENSMUSG00000019944	false
3873	TF-TG	ENSMUSG00000034701 (TF-TG) ENSMUSG00000019942	false
3874	TF-TG	ENSMUSG00000034701 (TF-TG) ENSMUSG00000019900	false
3875	TF-TG	ENSMUSG00000034701 (TF-TG) ENSMUSG00000019890	false
3876	TF-TG	ENSMUSG00000034701 (TF-TG) ENSMUSG00000019846	false
3877	TF-TG	ENSMUSG00000034701 (TF-TG) ENSMUSG00000019796	false
3878	TF-TG	ENSMUSG00000034701 (TF-TG) ENSMUSG00000019773	false
3879	TF-TG	ENSMUSG00000034701 (TF-TG) ENSMUSG00000019564	false
3880	TF-TG	ENSMUSG00000034701 (TF-TG) ENSMUSG00000019302	false
3881	TF-TG	ENSMUSG00000034701 (TF-TG) ENSMUSG00000019235	false
3882	TF-TG	ENSMUSG00000034701 (TF-TG) ENSMUSG00000018899	false
3883	TF-TG	ENSMUSG00000034701 (TF-TG) ENSMUSG00000018620	false
3884	TF-TG	ENSMUSG00000034701 (TF-TG) ENSMUSG00000018554	false
3885	TF-TG	ENSMUSG00000034701 (TF-TG) ENSMUSG00000018470	false
3886	TF-TG	ENSMUSG00000034701 (TF-TG) ENSMUSG00000018339	false
3887	TF-TG	ENSMUSG00000034701 (TF-TG) ENSMUSG00000017943	false
3888	TF-TG	ENSMUSG00000034701 (TF-TG) ENSMUSG00000017861	false
3889	TF-TG	ENSMUSG00000034701 (TF-TG) ENSMUSG00000017716	false
3890	TF-TG	ENSMUSG00000034701 (TF-TG) ENSMUSG00000017652	false
3891	TF-TG	ENSMUSG00000034701 (TF-TG) ENSMUSG00000017550	false
3892	TF-TG	ENSMUSG00000034701 (TF-TG) ENSMUSG00000017466	false
3893	TF-TG	ENSMUSG00000034701 (TF-TG) ENSMUSG00000017446	false
3894	TF-TG	ENSMUSG00000034701 (TF-TG) ENSMUSG00000017165	false
3895	TF-TG	ENSMUSG00000034701 (TF-TG) ENSMUSG00000015829	false
3896	TF-TG	ENSMUSG00000034701 (TF-TG) ENSMUSG00000014846	false
3897	TF-TG	ENSMUSG00000034701 (TF-TG) ENSMUSG00000013921	false
3898	TF-TG	ENSMUSG00000034701 (TF-TG) ENSMUSG00000013523	false
3899	TF-TG	ENSMUSG00000034701 (TF-TG) ENSMUSG00000013338	false
3900	TF-TG	ENSMUSG00000034701 (TF-TG) ENSMUSG00000012443	false
3901	TF-TG	ENSMUSG00000034701 (TF-TG) ENSMUSG00000012350	false
3902	TF-TG	ENSMUSG00000034701 (TF-TG) ENSMUSG00000011148	false
3903	TF-TG	ENSMUSG00000034701 (TF-TG) ENSMUSG00000010830	false
3904	TF-TG	ENSMUSG00000034701 (TF-TG) ENSMUSG00000010505	false
3905	TF-TG	ENSMUSG00000034701 (TF-TG) ENSMUSG00000010362	false
3906	TF-TG	ENSMUSG00000034701 (TF-TG) ENSMUSG00000010066	false
3907	TF-TG	ENSMUSG00000034701 (TF-TG) ENSMUSG00000010021	false
3908	TF-TG	ENSMUSG00000034701 (TF-TG) ENSMUSG00000009545	false
3909	TF-TG	ENSMUSG00000034701 (TF-TG) ENSMUSG00000009292	false
3910	TF-TG	ENSMUSG00000034701 (TF-TG) ENSMUSG00000009092	false
3911	TF-TG	ENSMUSG00000034701 (TF-TG) ENSMUSG00000008461	false
3912	TF-TG	ENSMUSG00000034701 (TF-TG) ENSMUSG00000007989	false
3913	TF-TG	ENSMUSG00000034701 (TF-TG) ENSMUSG00000007207	false
3914	TF-TG	ENSMUSG00000034701 (TF-TG) ENSMUSG00000006586	false
3915	TF-TG	ENSMUSG00000034701 (TF-TG) ENSMUSG00000006575	false
3916	TF-TG	ENSMUSG00000034701 (TF-TG) ENSMUSG00000006546	false
3917	TF-TG	ENSMUSG00000034701 (TF-TG) ENSMUSG00000006494	false
3918	TF-TG	ENSMUSG00000034701 (TF-TG) ENSMUSG00000006435	false
3919	TF-TG	ENSMUSG00000034701 (TF-TG) ENSMUSG00000005973	false
3920	TF-TG	ENSMUSG00000034701 (TF-TG) ENSMUSG00000005873	false
3921	TF-TG	ENSMUSG00000034701 (TF-TG) ENSMUSG00000005672	false
3922	TF-TG	ENSMUSG00000034701 (TF-TG) ENSMUSG00000005533	false
3923	TF-TG	ENSMUSG00000034701 (TF-TG) ENSMUSG00000005470	false
3924	TF-TG	ENSMUSG00000034701 (TF-TG) ENSMUSG00000005410	false
3925	TF-TG	ENSMUSG00000034701 (TF-TG) ENSMUSG00000004709	false
3926	TF-TG	ENSMUSG00000034701 (TF-TG) ENSMUSG00000004654	false
3927	TF-TG	ENSMUSG00000034701 (TF-TG) ENSMUSG00000004038	false
3928	TF-TG	ENSMUSG00000034701 (TF-TG) ENSMUSG00000003545	false
3929	TF-TG	ENSMUSG00000034701 (TF-TG) ENSMUSG00000003436	false
3930	TF-TG	ENSMUSG00000034701 (TF-TG) ENSMUSG00000003418	false
3931	TF-TG	ENSMUSG00000034701 (TF-TG) ENSMUSG00000003283	false
3932	TF-TG	ENSMUSG00000034701 (TF-TG) ENSMUSG00000003273	false
3933	TF-TG	ENSMUSG00000034701 (TF-TG) ENSMUSG00000003032	false
3934	TF-TG	ENSMUSG00000034701 (TF-TG) ENSMUSG00000002835	false
3935	TF-TG	ENSMUSG00000034701 (TF-TG) ENSMUSG00000002055	false
3936	TF-TG	ENSMUSG00000034701 (TF-TG) ENSMUSG00000001901	false
3937	TF-TG	ENSMUSG00000034701 (TF-TG) ENSMUSG00000001525	false
3938	TF-TG	ENSMUSG00000034701 (TF-TG) ENSMUSG00000001403	false
3939	TF-TG	ENSMUSG00000034701 (TF-TG) ENSMUSG00000001333	false
3940	TF-TG	ENSMUSG00000034701 (TF-TG) ENSMUSG00000001120	false
3941	TF-TG	ENSMUSG00000034701 (TF-TG) ENSMUSG00000000394	false
3942	TF-TG	ENSMUSG00000034701 (TF-TG) ENSMUSG00000000253	false
3943	TF-TG	ENSMUSG00000034701 (TF-TG) ENSMUSG00000000142	false
3944	TF-lincRNA	ENSMUSG00000027434 (TF-lincRNA) ENSMUSG00000086847	false
3945	TF-lincRNA	ENSMUSG00000027434 (TF-lincRNA) ENSMUSG00000086141	false
3946	TF-lincRNA	ENSMUSG00000027434 (TF-lincRNA) ENSMUSG00000097632	false
3947	TF-lincRNA	ENSMUSG00000027434 (TF-lincRNA) ENSMUSG00000097561	false
3948	TF-TG	ENSMUSG00000027434 (TF-TG) ENSMUSG00000096146	false
3949	TF-TG	ENSMUSG00000027434 (TF-TG) ENSMUSG00000094626	false
3950	TF-TG	ENSMUSG00000027434 (TF-TG) ENSMUSG00000087230	false
3951	TF-TG	ENSMUSG00000027434 (TF-TG) ENSMUSG00000079553	false
3952	TF-TG	ENSMUSG00000027434 (TF-TG) ENSMUSG00000079442	false
3953	TF-TG	ENSMUSG00000027434 (TF-TG) ENSMUSG00000079037	false
3954	TF-TG	ENSMUSG00000027434 (TF-TG) ENSMUSG00000074882	false
3955	TF-TG	ENSMUSG00000027434 (TF-TG) ENSMUSG00000074785	false
3956	TF-TG	ENSMUSG00000027434 (TF-TG) ENSMUSG00000074217	false
3957	TF-TG	ENSMUSG00000027434 (TF-TG) ENSMUSG00000073207	false
3958	TF-TG	ENSMUSG00000027434 (TF-TG) ENSMUSG00000072115	false
3959	TF-TG	ENSMUSG00000027434 (TF-TG) ENSMUSG00000072082	false
3960	TF-TG	ENSMUSG00000027434 (TF-TG) ENSMUSG00000071847	false
3961	TF-TG	ENSMUSG00000027434 (TF-TG) ENSMUSG00000071553	false
3962	TF-TG	ENSMUSG00000027434 (TF-TG) ENSMUSG00000071547	false
3963	TF-TG	ENSMUSG00000027434 (TF-TG) ENSMUSG00000070867	false
3964	TF-TG	ENSMUSG00000027434 (TF-TG) ENSMUSG00000070576	false
3965	TF-TG	ENSMUSG00000027434 (TF-TG) ENSMUSG00000070407	false
3966	TF-TG	ENSMUSG00000027434 (TF-TG) ENSMUSG00000070348	false
3967	TF-TG	ENSMUSG00000027434 (TF-TG) ENSMUSG00000069805	false
3968	TF-TG	ENSMUSG00000027434 (TF-TG) ENSMUSG00000068154	false
3969	TF-TG	ENSMUSG00000027434 (TF-TG) ENSMUSG00000066152	false
3970	TF-TG	ENSMUSG00000027434 (TF-TG) ENSMUSG00000062859	false
3971	TF-TG	ENSMUSG00000027434 (TF-TG) ENSMUSG00000062248	false
3972	TF-TG	ENSMUSG00000027434 (TF-TG) ENSMUSG00000062184	false
3973	TF-TG	ENSMUSG00000027434 (TF-TG) ENSMUSG00000062078	false
3974	TF-TG	ENSMUSG00000027434 (TF-TG) ENSMUSG00000062070	false
3975	TF-TG	ENSMUSG00000027434 (TF-TG) ENSMUSG00000061718	false
3976	TF-TG	ENSMUSG00000027434 (TF-TG) ENSMUSG00000061533	false
3977	TF-TG	ENSMUSG00000027434 (TF-TG) ENSMUSG00000060063	false
3978	TF-TG	ENSMUSG00000027434 (TF-TG) ENSMUSG00000059939	false
3979	TF-TG	ENSMUSG00000027434 (TF-TG) ENSMUSG00000058135	false
3980	TF-TG	ENSMUSG00000027434 (TF-TG) ENSMUSG00000058070	false
3981	TF-TG	ENSMUSG00000027434 (TF-TG) ENSMUSG00000057604	false
3982	TF-TG	ENSMUSG00000027434 (TF-TG) ENSMUSG00000056648	false
3983	TF-TG	ENSMUSG00000027434 (TF-TG) ENSMUSG00000056602	false
3984	TF-TG	ENSMUSG00000027434 (TF-TG) ENSMUSG00000056069	false
3985	TF-TG	ENSMUSG00000027434 (TF-TG) ENSMUSG00000055612	false
3986	TF-TG	ENSMUSG00000027434 (TF-TG) ENSMUSG00000055210	false
3987	TF-TG	ENSMUSG00000027434 (TF-TG) ENSMUSG00000054893	false
3988	TF-TG	ENSMUSG00000027434 (TF-TG) ENSMUSG00000054321	false
3989	TF-TG	ENSMUSG00000027434 (TF-TG) ENSMUSG00000054200	false
3990	TF-TG	ENSMUSG00000027434 (TF-TG) ENSMUSG00000053460	false
3991	TF-TG	ENSMUSG00000027434 (TF-TG) ENSMUSG00000053046	false
3992	TF-TG	ENSMUSG00000027434 (TF-TG) ENSMUSG00000052135	false
3993	TF-TG	ENSMUSG00000027434 (TF-TG) ENSMUSG00000052117	false
3994	TF-TG	ENSMUSG00000027434 (TF-TG) ENSMUSG00000052062	false
3995	TF-TG	ENSMUSG00000027434 (TF-TG) ENSMUSG00000051220	false
3996	TF-TG	ENSMUSG00000027434 (TF-TG) ENSMUSG00000048763	false
3997	TF-TG	ENSMUSG00000027434 (TF-TG) ENSMUSG00000048450	false
3998	TF-TG	ENSMUSG00000027434 (TF-TG) ENSMUSG00000048349	false
3999	TF-TG	ENSMUSG00000027434 (TF-TG) ENSMUSG00000048058	false
4000	TF-TG	ENSMUSG00000027434 (TF-TG) ENSMUSG00000047986	false
4001	TF-TG	ENSMUSG00000027434 (TF-TG) ENSMUSG00000047534	false
4002	TF-TG	ENSMUSG00000027434 (TF-TG) ENSMUSG00000047242	false
4003	TF-TG	ENSMUSG00000027434 (TF-TG) ENSMUSG00000047221	false
4004	TF-TG	ENSMUSG00000027434 (TF-TG) ENSMUSG00000047205	false
4005	TF-TG	ENSMUSG00000027434 (TF-TG) ENSMUSG00000047139	false
4006	TF-TG	ENSMUSG00000027434 (TF-TG) ENSMUSG00000047044	false
4007	TF-TG	ENSMUSG00000027434 (TF-TG) ENSMUSG00000047003	false
4008	TF-TG	ENSMUSG00000027434 (TF-TG) ENSMUSG00000046668	false
4009	TF-TG	ENSMUSG00000027434 (TF-TG) ENSMUSG00000046591	false
4010	TF-TG	ENSMUSG00000027434 (TF-TG) ENSMUSG00000046546	false
4011	TF-TG	ENSMUSG00000027434 (TF-TG) ENSMUSG00000046447	false
4012	TF-TG	ENSMUSG00000027434 (TF-TG) ENSMUSG00000046242	false
4013	TF-TG	ENSMUSG00000027434 (TF-TG) ENSMUSG00000045751	false
4014	TF-TG	ENSMUSG00000027434 (TF-TG) ENSMUSG00000045215	false
4015	TF-TG	ENSMUSG00000027434 (TF-TG) ENSMUSG00000044921	false
4016	TF-TG	ENSMUSG00000027434 (TF-TG) ENSMUSG00000044348	false
4017	TF-TG	ENSMUSG00000027434 (TF-TG) ENSMUSG00000043154	false
4018	TF-TG	ENSMUSG00000027434 (TF-TG) ENSMUSG00000043004	false
4019	TF-TG	ENSMUSG00000027434 (TF-TG) ENSMUSG00000042734	false
4020	TF-TG	ENSMUSG00000027434 (TF-TG) ENSMUSG00000042462	false
4021	TF-TG	ENSMUSG00000027434 (TF-TG) ENSMUSG00000042215	false
4022	TF-TG	ENSMUSG00000027434 (TF-TG) ENSMUSG00000042115	false
4023	TF-TG	ENSMUSG00000027434 (TF-TG) ENSMUSG00000042029	false
4024	TF-TG	ENSMUSG00000027434 (TF-TG) ENSMUSG00000041859	false
4025	TF-TG	ENSMUSG00000027434 (TF-TG) ENSMUSG00000041548	false
4026	TF-TG	ENSMUSG00000027434 (TF-TG) ENSMUSG00000041498	false
4027	TF-TG	ENSMUSG00000027434 (TF-TG) ENSMUSG00000041420	false
4028	TF-TG	ENSMUSG00000027434 (TF-TG) ENSMUSG00000041268	false
4029	TF-TG	ENSMUSG00000027434 (TF-TG) ENSMUSG00000041075	false
4030	TF-TG	ENSMUSG00000027434 (TF-TG) ENSMUSG00000040605	false
4031	TF-TG	ENSMUSG00000027434 (TF-TG) ENSMUSG00000040483	false
4032	TF-TG	ENSMUSG00000027434 (TF-TG) ENSMUSG00000040462	false
4033	TF-TG	ENSMUSG00000027434 (TF-TG) ENSMUSG00000040209	false
4034	TF-TG	ENSMUSG00000027434 (TF-TG) ENSMUSG00000040170	false
4035	TF-TG	ENSMUSG00000027434 (TF-TG) ENSMUSG00000040084	false
4036	TF-TG	ENSMUSG00000027434 (TF-TG) ENSMUSG00000040046	false
4037	TF-TG	ENSMUSG00000027434 (TF-TG) ENSMUSG00000039982	false
4038	TF-TG	ENSMUSG00000027434 (TF-TG) ENSMUSG00000039943	false
4039	TF-TG	ENSMUSG00000027434 (TF-TG) ENSMUSG00000039831	false
4040	TF-TG	ENSMUSG00000027434 (TF-TG) ENSMUSG00000039814	false
4041	TF-TG	ENSMUSG00000027434 (TF-TG) ENSMUSG00000039748	false
4042	TF-TG	ENSMUSG00000027434 (TF-TG) ENSMUSG00000039601	false
4043	TF-TG	ENSMUSG00000027434 (TF-TG) ENSMUSG00000039323	false
4044	TF-TG	ENSMUSG00000027434 (TF-TG) ENSMUSG00000039270	false
4045	TF-TG	ENSMUSG00000027434 (TF-TG) ENSMUSG00000039158	false
4046	TF-TG	ENSMUSG00000027434 (TF-TG) ENSMUSG00000039145	false
4047	TF-TG	ENSMUSG00000027434 (TF-TG) ENSMUSG00000039126	false
4048	TF-TG	ENSMUSG00000027434 (TF-TG) ENSMUSG00000039050	false
4049	TF-TG	ENSMUSG00000027434 (TF-TG) ENSMUSG00000038599	false
4050	TF-TG	ENSMUSG00000027434 (TF-TG) ENSMUSG00000038456	false
4051	TF-TG	ENSMUSG00000027434 (TF-TG) ENSMUSG00000038349	false
4052	TF-TG	ENSMUSG00000027434 (TF-TG) ENSMUSG00000038319	false
4053	TF-TG	ENSMUSG00000027434 (TF-TG) ENSMUSG00000038005	false
4054	TF-TG	ENSMUSG00000027434 (TF-TG) ENSMUSG00000037868	false
4055	TF-TG	ENSMUSG00000027434 (TF-TG) ENSMUSG00000037664	false
4056	TF-TG	ENSMUSG00000027434 (TF-TG) ENSMUSG00000037643	false
4057	TF-TG	ENSMUSG00000027434 (TF-TG) ENSMUSG00000037306	false
4058	TF-TG	ENSMUSG00000027434 (TF-TG) ENSMUSG00000037159	false
4059	TF-TG	ENSMUSG00000027434 (TF-TG) ENSMUSG00000036875	false
4060	TF-TG	ENSMUSG00000027434 (TF-TG) ENSMUSG00000036766	false
4061	TF-TG	ENSMUSG00000027434 (TF-TG) ENSMUSG00000036225	false
4062	TF-TG	ENSMUSG00000027434 (TF-TG) ENSMUSG00000036036	false
4063	TF-TG	ENSMUSG00000027434 (TF-TG) ENSMUSG00000035864	false
4064	TF-TG	ENSMUSG00000027434 (TF-TG) ENSMUSG00000035509	false
4065	TF-TG	ENSMUSG00000027434 (TF-TG) ENSMUSG00000035455	false
4066	TF-TG	ENSMUSG00000027434 (TF-TG) ENSMUSG00000035431	false
4067	TF-TG	ENSMUSG00000027434 (TF-TG) ENSMUSG00000035277	false
4068	TF-TG	ENSMUSG00000027434 (TF-TG) ENSMUSG00000035158	false
4069	TF-TG	ENSMUSG00000027434 (TF-TG) ENSMUSG00000034883	false
4070	TF-TG	ENSMUSG00000027434 (TF-TG) ENSMUSG00000034858	false
4071	TF-TG	ENSMUSG00000027434 (TF-TG) ENSMUSG00000034701	false
4072	TF-TG	ENSMUSG00000027434 (TF-TG) ENSMUSG00000034317	false
4073	TF-TG	ENSMUSG00000027434 (TF-TG) ENSMUSG00000034265	false
4074	TF-TG	ENSMUSG00000027434 (TF-TG) ENSMUSG00000034177	false
4075	TF-TG	ENSMUSG00000027434 (TF-TG) ENSMUSG00000033900	false
4076	TF-TG	ENSMUSG00000027434 (TF-TG) ENSMUSG00000033287	false
4077	TF-TG	ENSMUSG00000027434 (TF-TG) ENSMUSG00000033177	false
4078	TF-TG	ENSMUSG00000027434 (TF-TG) ENSMUSG00000032783	false
4079	TF-TG	ENSMUSG00000027434 (TF-TG) ENSMUSG00000032640	false
4080	TF-TG	ENSMUSG00000027434 (TF-TG) ENSMUSG00000032625	false
4081	TF-TG	ENSMUSG00000027434 (TF-TG) ENSMUSG00000032489	false
4082	TF-TG	ENSMUSG00000027434 (TF-TG) ENSMUSG00000032254	false
4083	TF-TG	ENSMUSG00000027434 (TF-TG) ENSMUSG00000032120	false
4084	TF-TG	ENSMUSG00000027434 (TF-TG) ENSMUSG00000032017	false
4085	TF-TG	ENSMUSG00000027434 (TF-TG) ENSMUSG00000032015	false
4086	TF-TG	ENSMUSG00000027434 (TF-TG) ENSMUSG00000031730	false
4087	TF-TG	ENSMUSG00000027434 (TF-TG) ENSMUSG00000031668	false
4088	TF-TG	ENSMUSG00000027434 (TF-TG) ENSMUSG00000031629	false
4089	TF-TG	ENSMUSG00000027434 (TF-TG) ENSMUSG00000031617	false
4090	TF-TG	ENSMUSG00000027434 (TF-TG) ENSMUSG00000031586	false
4091	TF-TG	ENSMUSG00000027434 (TF-TG) ENSMUSG00000031220	false
4092	TF-TG	ENSMUSG00000027434 (TF-TG) ENSMUSG00000030643	false
4093	TF-TG	ENSMUSG00000027434 (TF-TG) ENSMUSG00000030407	false
4094	TF-TG	ENSMUSG00000027434 (TF-TG) ENSMUSG00000030340	false
4095	TF-TG	ENSMUSG00000027434 (TF-TG) ENSMUSG00000030029	false
4096	TF-TG	ENSMUSG00000027434 (TF-TG) ENSMUSG00000029847	false
4097	TF-TG	ENSMUSG00000027434 (TF-TG) ENSMUSG00000029650	false
4098	TF-TG	ENSMUSG00000027434 (TF-TG) ENSMUSG00000029570	false
4099	TF-TG	ENSMUSG00000027434 (TF-TG) ENSMUSG00000029436	false
4100	TF-TG	ENSMUSG00000027434 (TF-TG) ENSMUSG00000029414	false
4101	TF-TG	ENSMUSG00000027434 (TF-TG) ENSMUSG00000029195	false
4102	TF-TG	ENSMUSG00000027434 (TF-TG) ENSMUSG00000029101	false
4103	TF-TG	ENSMUSG00000027434 (TF-TG) ENSMUSG00000028884	false
4104	TF-TG	ENSMUSG00000027434 (TF-TG) ENSMUSG00000028785	false
4105	TF-TG	ENSMUSG00000027434 (TF-TG) ENSMUSG00000028718	false
4106	TF-TG	ENSMUSG00000027434 (TF-TG) ENSMUSG00000028702	false
4107	TF-TG	ENSMUSG00000027434 (TF-TG) ENSMUSG00000028633	false
4108	TF-TG	ENSMUSG00000027434 (TF-TG) ENSMUSG00000028573	false
4109	TF-TG	ENSMUSG00000027434 (TF-TG) ENSMUSG00000028438	false
4110	TF-TG	ENSMUSG00000027434 (TF-TG) ENSMUSG00000028341	false
4111	TF-TG	ENSMUSG00000027434 (TF-TG) ENSMUSG00000028282	false
4112	TF-TG	ENSMUSG00000027434 (TF-TG) ENSMUSG00000027654	false
4113	TF-TG	ENSMUSG00000027434 (TF-TG) ENSMUSG00000027641	false
4114	TF-TG	ENSMUSG00000027434 (TF-TG) ENSMUSG00000027544	false
4115	TF-TG	ENSMUSG00000027434 (TF-TG) ENSMUSG00000027499	false
4116	TF-TG	ENSMUSG00000027434 (TF-TG) ENSMUSG00000027420	false
4117	TF-TG	ENSMUSG00000027434 (TF-TG) ENSMUSG00000027381	false
4118	TF-TG	ENSMUSG00000027434 (TF-TG) ENSMUSG00000027326	false
4119	TF-TG	ENSMUSG00000027434 (TF-TG) ENSMUSG00000026786	false
4120	TF-TG	ENSMUSG00000027434 (TF-TG) ENSMUSG00000026669	false
4121	TF-TG	ENSMUSG00000027434 (TF-TG) ENSMUSG00000026483	false
4122	TF-TG	ENSMUSG00000027434 (TF-TG) ENSMUSG00000026355	false
4123	TF-TG	ENSMUSG00000027434 (TF-TG) ENSMUSG00000025969	false
4124	TF-TG	ENSMUSG00000027434 (TF-TG) ENSMUSG00000025912	false
4125	TF-TG	ENSMUSG00000027434 (TF-TG) ENSMUSG00000025602	false
4126	TF-TG	ENSMUSG00000027434 (TF-TG) ENSMUSG00000025151	false
4127	TF-TG	ENSMUSG00000027434 (TF-TG) ENSMUSG00000025026	false
4128	TF-TG	ENSMUSG00000027434 (TF-TG) ENSMUSG00000024897	false
4129	TF-TG	ENSMUSG00000027434 (TF-TG) ENSMUSG00000024807	false
4130	TF-TG	ENSMUSG00000027434 (TF-TG) ENSMUSG00000024777	false
4131	TF-TG	ENSMUSG00000027434 (TF-TG) ENSMUSG00000024743	false
4132	TF-TG	ENSMUSG00000027434 (TF-TG) ENSMUSG00000024646	false
4133	TF-TG	ENSMUSG00000027434 (TF-TG) ENSMUSG00000024533	false
4134	TF-TG	ENSMUSG00000027434 (TF-TG) ENSMUSG00000024516	false
4135	TF-TG	ENSMUSG00000027434 (TF-TG) ENSMUSG00000024501	false
4136	TF-TG	ENSMUSG00000027434 (TF-TG) ENSMUSG00000024301	false
4137	TF-TG	ENSMUSG00000027434 (TF-TG) ENSMUSG00000024232	false
4138	TF-TG	ENSMUSG00000027434 (TF-TG) ENSMUSG00000024193	false
4139	TF-TG	ENSMUSG00000027434 (TF-TG) ENSMUSG00000024175	false
4140	TF-TG	ENSMUSG00000027434 (TF-TG) ENSMUSG00000023473	false
4141	TF-TG	ENSMUSG00000027434 (TF-TG) ENSMUSG00000023272	false
4142	TF-TG	ENSMUSG00000027434 (TF-TG) ENSMUSG00000023092	false
4143	TF-TG	ENSMUSG00000027434 (TF-TG) ENSMUSG00000023066	false
4144	TF-TG	ENSMUSG00000027434 (TF-TG) ENSMUSG00000023017	false
4145	TF-TG	ENSMUSG00000027434 (TF-TG) ENSMUSG00000023015	false
4146	TF-TG	ENSMUSG00000027434 (TF-TG) ENSMUSG00000022945	false
4147	TF-TG	ENSMUSG00000027434 (TF-TG) ENSMUSG00000022881	false
4148	TF-TG	ENSMUSG00000027434 (TF-TG) ENSMUSG00000022829	false
4149	TF-TG	ENSMUSG00000027434 (TF-TG) ENSMUSG00000022773	false
4150	TF-TG	ENSMUSG00000027434 (TF-TG) ENSMUSG00000022673	false
4151	TF-TG	ENSMUSG00000027434 (TF-TG) ENSMUSG00000022528	false
4152	TF-TG	ENSMUSG00000027434 (TF-TG) ENSMUSG00000022489	false
4153	TF-TG	ENSMUSG00000027434 (TF-TG) ENSMUSG00000022253	false
4154	TF-TG	ENSMUSG00000027434 (TF-TG) ENSMUSG00000022026	false
4155	TF-TG	ENSMUSG00000027434 (TF-TG) ENSMUSG00000022021	false
4156	TF-TG	ENSMUSG00000027434 (TF-TG) ENSMUSG00000021876	false
4157	TF-TG	ENSMUSG00000027434 (TF-TG) ENSMUSG00000021846	false
4158	TF-TG	ENSMUSG00000027434 (TF-TG) ENSMUSG00000021685	false
4159	TF-TG	ENSMUSG00000027434 (TF-TG) ENSMUSG00000021453	false
4160	TF-TG	ENSMUSG00000027434 (TF-TG) ENSMUSG00000021391	false
4161	TF-TG	ENSMUSG00000027434 (TF-TG) ENSMUSG00000021194	false
4162	TF-TG	ENSMUSG00000027434 (TF-TG) ENSMUSG00000021115	false
4163	TF-TG	ENSMUSG00000027434 (TF-TG) ENSMUSG00000020901	false
4164	TF-TG	ENSMUSG00000027434 (TF-TG) ENSMUSG00000020897	false
4165	TF-TG	ENSMUSG00000027434 (TF-TG) ENSMUSG00000020873	false
4166	TF-TG	ENSMUSG00000027434 (TF-TG) ENSMUSG00000020814	false
4167	TF-TG	ENSMUSG00000027434 (TF-TG) ENSMUSG00000020808	false
4168	TF-TG	ENSMUSG00000027434 (TF-TG) ENSMUSG00000020741	false
4169	TF-TG	ENSMUSG00000027434 (TF-TG) ENSMUSG00000020577	false
4170	TF-TG	ENSMUSG00000027434 (TF-TG) ENSMUSG00000020261	false
4171	TF-TG	ENSMUSG00000027434 (TF-TG) ENSMUSG00000020140	false
4172	TF-TG	ENSMUSG00000027434 (TF-TG) ENSMUSG00000020121	false
4173	TF-TG	ENSMUSG00000027434 (TF-TG) ENSMUSG00000020019	false
4174	TF-TG	ENSMUSG00000027434 (TF-TG) ENSMUSG00000019947	false
4175	TF-TG	ENSMUSG00000027434 (TF-TG) ENSMUSG00000019831	false
4176	TF-TG	ENSMUSG00000027434 (TF-TG) ENSMUSG00000019564	false
4177	TF-TG	ENSMUSG00000027434 (TF-TG) ENSMUSG00000019302	false
4178	TF-TG	ENSMUSG00000027434 (TF-TG) ENSMUSG00000018486	false
4179	TF-TG	ENSMUSG00000027434 (TF-TG) ENSMUSG00000018339	false
4180	TF-TG	ENSMUSG00000027434 (TF-TG) ENSMUSG00000017861	false
4181	TF-TG	ENSMUSG00000027434 (TF-TG) ENSMUSG00000017724	false
4182	TF-TG	ENSMUSG00000027434 (TF-TG) ENSMUSG00000017550	false
4183	TF-TG	ENSMUSG00000027434 (TF-TG) ENSMUSG00000017446	false
4184	TF-TG	ENSMUSG00000027434 (TF-TG) ENSMUSG00000017165	false
4185	TF-TG	ENSMUSG00000027434 (TF-TG) ENSMUSG00000017144	false
4186	TF-TG	ENSMUSG00000027434 (TF-TG) ENSMUSG00000017057	false
4187	TF-TG	ENSMUSG00000027434 (TF-TG) ENSMUSG00000015962	false
4188	TF-TG	ENSMUSG00000027434 (TF-TG) ENSMUSG00000014786	false
4189	TF-TG	ENSMUSG00000027434 (TF-TG) ENSMUSG00000013523	false
4190	TF-TG	ENSMUSG00000027434 (TF-TG) ENSMUSG00000012350	false
4191	TF-TG	ENSMUSG00000027434 (TF-TG) ENSMUSG00000011256	false
4192	TF-TG	ENSMUSG00000027434 (TF-TG) ENSMUSG00000006586	false
4193	TF-TG	ENSMUSG00000027434 (TF-TG) ENSMUSG00000005533	false
[truncated: 17,177 more rows]
