# Supplementary material for: Regulatory network analysis of Paneth cell and goblet cell enriched gut organoids using transcriptomics approaches
Source: Royal Society of Chemistry journal article supplement (doi:10.1039/c9mo00130a), 2019-12-10
Supplement: c9mo00130a2.cys [file c9mo00130a2.cys › CytoscapeSession-2019_09_26-21_57/tables/62-Gob_network_lfc1.txt/LOCAL_ATTRS-org.cytoscape.model.CyNode-Gob_network_lfc1.txt+default+node.cytable]

CyCSV-Version	1
SUID	name	selected
java.lang.Long	java.lang.String	java.lang.Boolean
Gob_network_lfc1.txt default node
72	ENSMUSG00000089774	false
73	ENSMUSG00000067377	false
74	ENSMUSG00000053931	false
75	ENSMUSG00000052229	false
76	ENSMUSG00000047238	false
77	ENSMUSG00000046387	false
78	ENSMUSG00000043496	false
79	ENSMUSG00000044365	false
80	ENSMUSG00000036533	false
81	ENSMUSG00000031748	false
82	ENSMUSG00000031202	false
83	ENSMUSG00000026558	false
84	ENSMUSG00000022369	false
85	ENSMUSG00000021266	false
86	ENSMUSG00000020848	false
87	ENSMUSG00000021062	false
88	ENSMUSG00000018698	false
89	ENSMUSG00000014813	false
90	ENSMUSG00000060935	false
91	ENSMUSG00000048482	false
92	ENSMUSG00000028463	false
93	ENSMUSG00000024691	false
94	ENSMUSG00000022711	false
95	ENSMUSG00000021373	false
96	ENSMUSG00000000058	false
97	ENSMUSG00000068923	false
98	ENSMUSG00000039485	false
99	mmu-miR-125b-1-3p	false
100	ENSMUSG00000080316	false
101	mmu-miR-221-5p	false
102	mmu-miR-134-5p	false
103	ENSMUSG00000054252	false
104	ENSMUSG00000044068	false
105	ENSMUSG00000030946	false
106	ENSMUSG00000028737	false
107	ENSMUSG00000027248	false
108	ENSMUSG00000028207	false
109	ENSMUSG00000022231	false
110	ENSMUSG00000020101	false
111	ENSMUSG00000057315	false
112	ENSMUSG00000063160	false
113	ENSMUSG00000046743	false
114	ENSMUSG00000032557	false
115	ENSMUSG00000027699	false
116	ENSMUSG00000026797	false
117	ENSMUSG00000016262	false
118	ENSMUSG00000001105	false
119	mmu-miR-676-3p	false
120	ENSMUSG00000027947	false
121	ENSMUSG00000000751	false
122	mmu-miR-125a-5p	false
123	ENSMUSG00000070056	false
124	ENSMUSG00000042828	false
125	ENSMUSG00000042367	false
126	ENSMUSG00000042851	false
127	ENSMUSG00000038893	false
128	ENSMUSG00000038248	false
129	ENSMUSG00000035274	false
130	ENSMUSG00000037239	false
131	ENSMUSG00000033174	false
132	ENSMUSG00000032997	false
133	ENSMUSG00000031561	false
134	ENSMUSG00000026259	false
135	ENSMUSG00000022091	false
136	ENSMUSG00000014444	false
137	ENSMUSG00000015837	false
138	ENSMUSG00000009418	false
139	mmu-miR-410-3p	false
140	ENSMUSG00000056812	false
141	ENSMUSG00000040896	false
142	ENSMUSG00000052727	false
143	ENSMUSG00000031647	false
144	ENSMUSG00000038264	false
145	ENSMUSG00000032575	false
146	ENSMUSG00000031442	false
147	ENSMUSG00000031749	false
148	ENSMUSG00000036422	false
149	ENSMUSG00000026473	false
150	ENSMUSG00000025738	false
151	ENSMUSG00000026235	false
152	ENSMUSG00000023036	false
153	ENSMUSG00000029033	false
154	ENSMUSG00000009394	false
155	mmu-miR-153-3p	false
156	ENSMUSG00000056394	false
157	ENSMUSG00000048012	false
158	ENSMUSG00000038943	false
159	ENSMUSG00000040699	false
160	ENSMUSG00000040195	false
161	ENSMUSG00000038507	false
162	ENSMUSG00000038178	false
163	ENSMUSG00000038224	false
164	ENSMUSG00000032409	false
165	ENSMUSG00000033411	false
166	ENSMUSG00000034614	false
167	ENSMUSG00000030737	false
168	ENSMUSG00000030867	false
169	ENSMUSG00000025271	false
170	ENSMUSG00000021569	false
171	ENSMUSG00000022358	false
172	ENSMUSG00000020941	false
173	ENSMUSG00000014905	false
174	ENSMUSG00000032204	false
175	ENSMUSG00000003053	false
176	mmu-miR-350-5p	false
177	ENSMUSG00000044934	false
178	ENSMUSG00000027605	false
179	ENSMUSG00000020225	false
180	ENSMUSG00000006273	false
181	ENSMUSG00000031557	false
182	ENSMUSG00000027808	false
183	ENSMUSG00000002265	false
184	mmu-miR-540-3p	false
185	ENSMUSG00000054723	false
186	ENSMUSG00000041741	false
187	ENSMUSG00000037822	false
188	ENSMUSG00000031596	false
189	ENSMUSG00000034111	false
190	ENSMUSG00000027822	false
191	ENSMUSG00000021952	false
192	ENSMUSG00000022043	false
193	ENSMUSG00000018548	false
194	mmu-miR-434-3p	false
195	mmu-miR-411-5p	false
196	mmu-miR-574-3p	false
197	mmu-miR-127-3p	false
198	ENSMUSG00000097131	false
199	mmu-miR-152-3p	false
200	mmu-miR-218-5p	false
201	ENSMUSG00000097101	false
202	ENSMUSG00000049881	false
203	mmu-miR-101a-3p	false
204	mmu-let-7e-5p	false
205	mmu-miR-195a-5p	false
206	mmu-miR-130a-3p	false
207	mmu-miR-210-3p	false
208	mmu-miR-677-5p	false
209	ENSMUSG00000070392	false
210	mmu-miR-7a-5p	false
211	ENSMUSG00000072694	false
212	mmu-miR-497a-5p	false
213	ENSMUSG00000106847	false
214	ENSMUSG00000064043	false
215	ENSMUSG00000099519	false
216	ENSMUSG00000096944	false
217	mmu-miR-222-3p	false
218	ENSMUSG00000096954	false
219	ENSMUSG00000086503	false
220	ENSMUSG00000075511	false
221	mmu-miR-1945	false
222	mmu-miR-101c	false
223	ENSMUSG00000086847	false
224	ENSMUSG00000106634	false
225	ENSMUSG00000097515	false
226	ENSMUSG00000085329	false
227	ENSMUSG00000086141	false
228	ENSMUSG00000087196	false
229	ENSMUSG00000097632	false
230	ENSMUSG00000075010	false
231	ENSMUSG00000099364	false
232	ENSMUSG00000102123	false
233	ENSMUSG00000085152	false
234	ENSMUSG00000111857	false
235	ENSMUSG00000111528	false
236	ENSMUSG00000099025	false
237	ENSMUSG00000110866	false
238	ENSMUSG00000069713	false
239	ENSMUSG00000097415	false
240	ENSMUSG00000107728	false
241	ENSMUSG00000107879	false
242	ENSMUSG00000110276	false
243	ENSMUSG00000097284	false
244	ENSMUSG00000099552	false
245	ENSMUSG00000097932	false
246	ENSMUSG00000097059	false
247	ENSMUSG00000100022	false
248	ENSMUSG00000097709	false
249	ENSMUSG00000029878	false
250	ENSMUSG00000111043	false
251	ENSMUSG00000109936	false
252	ENSMUSG00000103067	false
253	ENSMUSG00000097561	false
254	ENSMUSG00000106658	false
255	ENSMUSG00000103043	false
256	ENSMUSG00000085183	false
257	ENSMUSG00000066176	false
258	ENSMUSG00000105146	false
259	ENSMUSG00000103965	false
260	ENSMUSG00000084797	false
261	ENSMUSG00000051331	false
262	ENSMUSG00000040146	false
263	ENSMUSG00000038765	false
264	ENSMUSG00000052942	false
265	ENSMUSG00000046179	false
266	ENSMUSG00000044312	false
267	ENSMUSG00000051235	false
268	ENSMUSG00000081058	false
269	ENSMUSG00000056296	false
270	ENSMUSG00000075588	false
271	ENSMUSG00000062867	false
272	ENSMUSG00000028587	false
273	ENSMUSG00000023505	false
274	ENSMUSG00000037279	false
275	ENSMUSG00000094840	false
276	ENSMUSG00000074444	false
277	ENSMUSG00000056004	false
278	ENSMUSG00000027220	false
279	ENSMUSG00000020774	false
280	ENSMUSG00000038742	false
281	ENSMUSG00000019917	false
282	ENSMUSG00000021965	false
283	ENSMUSG00000020592	false
284	ENSMUSG00000044453	false
285	ENSMUSG00000071648	false
286	ENSMUSG00000054453	false
287	ENSMUSG00000051735	false
288	ENSMUSG00000047228	false
289	ENSMUSG00000044860	false
290	ENSMUSG00000044702	false
291	ENSMUSG00000042743	false
292	ENSMUSG00000036768	false
293	ENSMUSG00000031465	false
294	ENSMUSG00000037979	false
295	ENSMUSG00000027223	false
296	ENSMUSG00000019429	false
297	ENSMUSG00000031770	false
298	ENSMUSG00000028466	false
299	ENSMUSG00000050556	false
300	ENSMUSG00000038126	false
301	ENSMUSG00000027353	false
302	ENSMUSG00000025574	false
303	ENSMUSG00000034701	false
304	ENSMUSG00000027434	false
305	ENSMUSG00000039239	false
306	ENSMUSG00000031073	false
307	ENSMUSG00000044024	false
308	ENSMUSG00000028496	false
309	ENSMUSG00000019737	false
310	ENSMUSG00000013338	false
311	ENSMUSG00000061533	false
312	ENSMUSG00000032323	false
313	ENSMUSG00000036564	false
314	ENSMUSG00000024986	false
315	ENSMUSG00000028108	false
316	ENSMUSG00000098132	false
317	ENSMUSG00000075296	false
318	ENSMUSG00000073764	false
319	ENSMUSG00000073399	false
320	ENSMUSG00000071723	false
321	ENSMUSG00000071113	false
322	ENSMUSG00000068246	false
323	ENSMUSG00000066366	false
324	ENSMUSG00000064213	false
325	ENSMUSG00000062510	false
326	ENSMUSG00000061758	false
327	ENSMUSG00000058260	false
328	ENSMUSG00000056492	false
329	ENSMUSG00000050394	false
330	ENSMUSG00000050379	false
331	ENSMUSG00000050192	false
332	ENSMUSG00000049871	false
333	ENSMUSG00000049047	false
334	ENSMUSG00000048763	false
335	ENSMUSG00000047242	false
336	ENSMUSG00000046634	false
337	ENSMUSG00000044921	false
338	ENSMUSG00000043518	false
339	ENSMUSG00000042312	false
340	ENSMUSG00000040274	false
341	ENSMUSG00000039231	false
342	ENSMUSG00000037216	false
343	ENSMUSG00000036264	false
344	ENSMUSG00000036109	false
345	ENSMUSG00000035697	false
346	ENSMUSG00000035246	false
347	ENSMUSG00000034923	false
348	ENSMUSG00000032860	false
349	ENSMUSG00000032064	false
350	ENSMUSG00000031570	false
351	ENSMUSG00000031377	false
352	ENSMUSG00000031255	false
353	ENSMUSG00000031099	false
354	ENSMUSG00000030782	false
355	ENSMUSG00000030641	false
356	ENSMUSG00000029363	false
357	ENSMUSG00000028332	false
358	ENSMUSG00000027496	false
359	ENSMUSG00000027331	false
360	ENSMUSG00000027298	false
361	ENSMUSG00000024771	false
362	ENSMUSG00000024660	false
363	ENSMUSG00000024330	false
364	ENSMUSG00000024313	false
365	ENSMUSG00000023192	false
366	ENSMUSG00000022661	false
367	ENSMUSG00000022199	false
368	ENSMUSG00000021070	false
369	ENSMUSG00000020627	false
370	ENSMUSG00000020534	false
371	ENSMUSG00000020032	false
372	ENSMUSG00000019987	false
373	ENSMUSG00000019888	false
374	ENSMUSG00000018924	false
375	ENSMUSG00000017311	false
376	ENSMUSG00000004540	false
377	ENSMUSG00000003824	false
378	ENSMUSG00000002297	false
379	ENSMUSG00000001366	false
380	ENSMUSG00000000037	false
381	ENSMUSG00000042834	false
382	ENSMUSG00000110573	false
383	ENSMUSG00000096001	false
384	ENSMUSG00000095448	false
385	ENSMUSG00000085007	false
386	ENSMUSG00000079180	false
387	ENSMUSG00000078963	false
388	ENSMUSG00000075701	false
389	ENSMUSG00000072244	false
390	ENSMUSG00000068617	false
391	ENSMUSG00000067724	false
392	ENSMUSG00000067229	false
393	ENSMUSG00000066090	false
394	ENSMUSG00000064246	false
395	ENSMUSG00000062591	false
396	ENSMUSG00000061762	false
397	ENSMUSG00000059708	false
398	ENSMUSG00000057346	false
399	ENSMUSG00000055963	false
400	ENSMUSG00000054423	false
401	ENSMUSG00000054169	false
402	ENSMUSG00000053783	false
403	ENSMUSG00000052520	false
404	ENSMUSG00000051579	false
405	ENSMUSG00000050822	false
406	ENSMUSG00000050821	false
407	ENSMUSG00000049670	false
408	ENSMUSG00000049409	false
409	ENSMUSG00000049044	false
410	ENSMUSG00000047749	false
411	ENSMUSG00000047641	false
412	ENSMUSG00000042675	false
413	ENSMUSG00000041995	false
414	ENSMUSG00000040987	false
415	ENSMUSG00000040747	false
416	ENSMUSG00000040605	false
417	ENSMUSG00000039419	false
418	ENSMUSG00000039103	false
419	ENSMUSG00000038312	false
420	ENSMUSG00000038112	false
421	ENSMUSG00000037617	false
422	ENSMUSG00000037217	false
423	ENSMUSG00000036912	false
424	ENSMUSG00000035930	false
425	ENSMUSG00000034871	false
426	ENSMUSG00000034591	false
427	ENSMUSG00000033083	false
428	ENSMUSG00000033033	false
429	ENSMUSG00000032726	false
430	ENSMUSG00000032679	false
431	ENSMUSG00000032625	false
432	ENSMUSG00000032564	false
433	ENSMUSG00000032377	false
434	ENSMUSG00000032348	false
435	ENSMUSG00000032192	false
436	ENSMUSG00000032181	false
437	ENSMUSG00000032086	false
438	ENSMUSG00000031635	false
439	ENSMUSG00000031430	false
440	ENSMUSG00000031253	false
441	ENSMUSG00000030518	false
442	ENSMUSG00000029821	false
443	ENSMUSG00000029283	false
444	ENSMUSG00000028933	false
445	ENSMUSG00000028713	false
446	ENSMUSG00000028438	false
447	ENSMUSG00000028262	false
448	ENSMUSG00000027350	false
449	ENSMUSG00000027297	false
450	ENSMUSG00000026531	false
451	ENSMUSG00000026489	false
452	ENSMUSG00000026432	false
453	ENSMUSG00000026389	false
454	ENSMUSG00000026223	false
455	ENSMUSG00000026204	false
456	ENSMUSG00000025665	false
457	ENSMUSG00000025592	false
458	ENSMUSG00000025528	false
459	ENSMUSG00000025497	false
460	ENSMUSG00000025403	false
461	ENSMUSG00000024990	false
462	ENSMUSG00000024730	false
463	ENSMUSG00000024084	false
464	ENSMUSG00000023906	false
465	ENSMUSG00000023078	false
466	ENSMUSG00000022705	false
467	ENSMUSG00000021763	false
468	ENSMUSG00000021541	false
469	ENSMUSG00000020651	false
470	ENSMUSG00000020143	false
471	ENSMUSG00000019467	false
472	ENSMUSG00000018581	false
473	ENSMUSG00000015829	false
474	ENSMUSG00000014846	false
475	ENSMUSG00000008575	false
476	ENSMUSG00000000632	false
477	ENSMUSG00000111709	false
478	ENSMUSG00000103392	false
479	ENSMUSG00000096146	false
480	ENSMUSG00000095930	false
481	ENSMUSG00000095567	false
482	ENSMUSG00000094305	false
483	ENSMUSG00000091721	false
484	ENSMUSG00000091243	false
485	ENSMUSG00000090291	false
486	ENSMUSG00000089901	false
487	ENSMUSG00000087230	false
488	ENSMUSG00000083282	false
489	ENSMUSG00000081769	false
490	ENSMUSG00000079497	false
491	ENSMUSG00000079056	false
492	ENSMUSG00000079015	false
493	ENSMUSG00000078776	false
494	ENSMUSG00000078521	false
495	ENSMUSG00000078502	false
496	ENSMUSG00000078485	false
497	ENSMUSG00000078234	false
498	ENSMUSG00000078185	false
499	ENSMUSG00000075610	false
500	ENSMUSG00000075289	false
501	ENSMUSG00000075270	false
502	ENSMUSG00000075012	false
503	ENSMUSG00000074882	false
504	ENSMUSG00000074867	false
505	ENSMUSG00000074825	false
506	ENSMUSG00000074651	false
507	ENSMUSG00000074625	false
508	ENSMUSG00000074004	false
509	ENSMUSG00000073889	false
510	ENSMUSG00000073705	false
511	ENSMUSG00000073680	false
512	ENSMUSG00000073530	false
513	ENSMUSG00000073293	false
514	ENSMUSG00000072875	false
515	ENSMUSG00000072849	false
516	ENSMUSG00000072812	false
517	ENSMUSG00000072623	false
518	ENSMUSG00000072294	false
519	ENSMUSG00000071984	false
520	ENSMUSG00000071856	false
521	ENSMUSG00000071847	false
522	ENSMUSG00000071553	false
523	ENSMUSG00000071551	false
524	ENSMUSG00000071226	false
525	ENSMUSG00000070687	false
526	ENSMUSG00000070577	false
527	ENSMUSG00000070423	false
528	ENSMUSG00000070366	false
529	ENSMUSG00000070034	false
530	ENSMUSG00000069922	false
531	ENSMUSG00000069920	false
532	ENSMUSG00000069792	false
533	ENSMUSG00000068270	false
534	ENSMUSG00000068154	false
535	ENSMUSG00000067818	false
536	ENSMUSG00000067750	false
537	ENSMUSG00000066607	false
538	ENSMUSG00000066191	false
539	ENSMUSG00000064326	false
540	ENSMUSG00000064177	false
541	ENSMUSG00000064165	false
542	ENSMUSG00000064158	false
543	ENSMUSG00000064109	false
544	ENSMUSG00000064080	false
545	ENSMUSG00000063929	false
546	ENSMUSG00000063851	false
547	ENSMUSG00000063727	false
548	ENSMUSG00000063704	false
549	ENSMUSG00000063142	false
550	ENSMUSG00000062995	false
551	ENSMUSG00000062826	false
552	ENSMUSG00000062410	false
553	ENSMUSG00000062252	false
554	ENSMUSG00000062210	false
555	ENSMUSG00000062184	false
556	ENSMUSG00000061601	false
557	ENSMUSG00000061462	false
558	ENSMUSG00000061292	false
559	ENSMUSG00000060961	false
560	ENSMUSG00000060615	false
561	ENSMUSG00000060600	false
562	ENSMUSG00000060208	false
563	ENSMUSG00000059493	false
564	ENSMUSG00000059406	false
565	ENSMUSG00000059149	false
566	ENSMUSG00000058740	false
567	ENSMUSG00000058392	false
568	ENSMUSG00000058063	false
569	ENSMUSG00000057933	false
570	ENSMUSG00000057897	false
571	ENSMUSG00000057614	false
572	ENSMUSG00000057604	false
573	ENSMUSG00000057541	false
574	ENSMUSG00000057406	false
575	ENSMUSG00000057400	false
576	ENSMUSG00000057182	false
577	ENSMUSG00000057092	false
578	ENSMUSG00000056724	false
579	ENSMUSG00000056648	false
580	ENSMUSG00000056050	false
581	ENSMUSG00000056035	false
582	ENSMUSG00000055980	false
583	ENSMUSG00000055978	false
584	ENSMUSG00000055912	false
585	ENSMUSG00000055862	false
586	ENSMUSG00000055809	false
587	ENSMUSG00000055745	false
588	ENSMUSG00000055730	false
589	ENSMUSG00000055629	false
590	ENSMUSG00000055610	false
591	ENSMUSG00000055567	false
592	ENSMUSG00000055493	false
593	ENSMUSG00000055210	false
594	ENSMUSG00000055172	false
595	ENSMUSG00000054932	false
596	ENSMUSG00000054764	false
597	ENSMUSG00000054659	false
598	ENSMUSG00000054630	false
599	ENSMUSG00000054555	false
600	ENSMUSG00000054484	false
601	ENSMUSG00000054146	false
602	ENSMUSG00000054034	false
603	ENSMUSG00000053852	false
604	ENSMUSG00000053765	false
605	ENSMUSG00000053702	false
606	ENSMUSG00000053310	false
607	ENSMUSG00000053279	false
608	ENSMUSG00000053219	false
609	ENSMUSG00000053158	false
610	ENSMUSG00000053046	false
611	ENSMUSG00000053004	false
612	ENSMUSG00000052921	false
613	ENSMUSG00000052852	false
614	ENSMUSG00000052364	false
615	ENSMUSG00000052271	false
616	ENSMUSG00000052212	false
617	ENSMUSG00000052062	false
618	ENSMUSG00000051980	false
619	ENSMUSG00000051951	false
620	ENSMUSG00000051517	false
621	ENSMUSG00000051314	false
622	ENSMUSG00000051251	false
623	ENSMUSG00000051209	false
624	ENSMUSG00000051067	false
625	ENSMUSG00000051043	false
626	ENSMUSG00000051003	false
627	ENSMUSG00000050824	false
628	ENSMUSG00000050751	false
629	ENSMUSG00000050711	false
630	ENSMUSG00000050520	false
631	ENSMUSG00000050511	false
632	ENSMUSG00000050505	false
633	ENSMUSG00000050473	false
634	ENSMUSG00000050447	false
635	ENSMUSG00000050410	false
636	ENSMUSG00000050359	false
637	ENSMUSG00000050321	false
638	ENSMUSG00000050234	false
639	ENSMUSG00000049536	false
640	ENSMUSG00000049307	false
641	ENSMUSG00000048911	false
642	ENSMUSG00000048905	false
643	ENSMUSG00000048899	false
644	ENSMUSG00000048807	false
645	ENSMUSG00000048776	false
646	ENSMUSG00000048330	false
647	ENSMUSG00000048200	false
648	ENSMUSG00000048078	false
649	ENSMUSG00000047996	false
650	ENSMUSG00000047963	false
651	ENSMUSG00000047730	false
652	ENSMUSG00000047702	false
653	ENSMUSG00000047473	false
654	ENSMUSG00000047344	false
655	ENSMUSG00000046841	false
656	ENSMUSG00000046613	false
657	ENSMUSG00000046589	false
658	ENSMUSG00000046480	false
659	ENSMUSG00000046442	false
660	ENSMUSG00000046402	false
661	ENSMUSG00000046352	false
662	ENSMUSG00000046295	false
663	ENSMUSG00000046215	false
664	ENSMUSG00000046204	false
665	ENSMUSG00000046178	false
666	ENSMUSG00000046160	false
667	ENSMUSG00000046070	false
668	ENSMUSG00000046058	false
669	ENSMUSG00000045912	false
670	ENSMUSG00000045871	false
671	ENSMUSG00000045790	false
672	ENSMUSG00000045763	false
673	ENSMUSG00000045281	false
674	ENSMUSG00000045273	false
675	ENSMUSG00000045215	false
676	ENSMUSG00000045064	false
677	ENSMUSG00000044912	false
678	ENSMUSG00000044646	false
679	ENSMUSG00000044626	false
680	ENSMUSG00000044468	false
681	ENSMUSG00000044313	false
682	ENSMUSG00000044033	false
683	ENSMUSG00000044017	false
684	ENSMUSG00000043461	false
685	ENSMUSG00000043419	false
686	ENSMUSG00000043388	false
687	ENSMUSG00000043029	false
688	ENSMUSG00000043015	false
689	ENSMUSG00000042942	false
690	ENSMUSG00000042842	false
691	ENSMUSG00000042804	false
692	ENSMUSG00000042763	false
693	ENSMUSG00000042750	false
694	ENSMUSG00000042712	false
695	ENSMUSG00000042631	false
696	ENSMUSG00000042515	false
697	ENSMUSG00000042371	false
698	ENSMUSG00000042306	false
699	ENSMUSG00000042303	false
700	ENSMUSG00000042215	false
701	ENSMUSG00000042179	false
702	ENSMUSG00000042041	false
703	ENSMUSG00000041974	false
704	ENSMUSG00000041889	false
705	ENSMUSG00000041801	false
706	ENSMUSG00000041794	false
707	ENSMUSG00000041734	false
708	ENSMUSG00000041729	false
709	ENSMUSG00000041688	false
710	ENSMUSG00000041658	false
711	ENSMUSG00000041608	false
712	ENSMUSG00000041577	false
713	ENSMUSG00000041476	false
714	ENSMUSG00000041420	false
715	ENSMUSG00000041406	false
716	ENSMUSG00000041351	false
717	ENSMUSG00000041323	false
718	ENSMUSG00000041301	false
719	ENSMUSG00000041268	false
720	ENSMUSG00000041261	false
721	ENSMUSG00000041000	false
722	ENSMUSG00000040972	false
723	ENSMUSG00000040891	false
724	ENSMUSG00000040714	false
725	ENSMUSG00000040694	false
726	ENSMUSG00000040613	false
727	ENSMUSG00000040584	false
728	ENSMUSG00000040433	false
729	ENSMUSG00000040389	false
730	ENSMUSG00000040387	false
731	ENSMUSG00000040181	false
732	ENSMUSG00000040170	false
733	ENSMUSG00000040152	false
734	ENSMUSG00000040121	false
735	ENSMUSG00000040118	false
736	ENSMUSG00000040016	false
737	ENSMUSG00000039831	false
738	ENSMUSG00000039809	false
739	ENSMUSG00000039765	false
740	ENSMUSG00000039748	false
741	ENSMUSG00000039629	false
742	ENSMUSG00000039601	false
743	ENSMUSG00000039396	false
744	ENSMUSG00000039200	false
745	ENSMUSG00000039187	false
746	ENSMUSG00000038903	false
747	ENSMUSG00000038692	false
748	ENSMUSG00000038560	false
749	ENSMUSG00000038555	false
750	ENSMUSG00000038349	false
751	ENSMUSG00000038305	false
752	ENSMUSG00000038296	false
753	ENSMUSG00000038209	false
754	ENSMUSG00000037973	false
755	ENSMUSG00000037962	false
756	ENSMUSG00000037942	false
757	ENSMUSG00000037852	false
758	ENSMUSG00000037784	false
759	ENSMUSG00000037762	false
760	ENSMUSG00000037725	false
761	ENSMUSG00000037712	false
762	ENSMUSG00000037624	false
763	ENSMUSG00000037621	false
764	ENSMUSG00000037509	false
765	ENSMUSG00000037474	false
766	ENSMUSG00000037275	false
767	ENSMUSG00000037126	false
768	ENSMUSG00000037106	false
769	ENSMUSG00000037035	false
770	ENSMUSG00000037033	false
771	ENSMUSG00000036995	false
772	ENSMUSG00000036989	false
773	ENSMUSG00000036944	false
774	ENSMUSG00000036872	false
775	ENSMUSG00000036782	false
776	ENSMUSG00000036766	false
777	ENSMUSG00000036492	false
778	ENSMUSG00000036437	false
779	ENSMUSG00000036327	false
780	ENSMUSG00000036304	false
781	ENSMUSG00000036225	false
782	ENSMUSG00000036053	false
783	ENSMUSG00000035984	false
784	ENSMUSG00000035896	false
785	ENSMUSG00000035775	false
786	ENSMUSG00000035699	false
787	ENSMUSG00000035683	false
788	ENSMUSG00000035615	false
789	ENSMUSG00000035431	false
790	ENSMUSG00000035390	false
791	ENSMUSG00000035277	false
792	ENSMUSG00000035200	false
793	ENSMUSG00000034785	false
794	ENSMUSG00000034677	false
795	ENSMUSG00000034675	false
796	ENSMUSG00000034656	false
797	ENSMUSG00000034648	false
798	ENSMUSG00000034528	false
799	ENSMUSG00000034472	false
800	ENSMUSG00000034303	false
801	ENSMUSG00000034118	false
802	ENSMUSG00000034112	false
803	ENSMUSG00000033871	false
804	ENSMUSG00000033825	false
805	ENSMUSG00000033763	false
806	ENSMUSG00000033634	false
807	ENSMUSG00000033590	false
808	ENSMUSG00000033579	false
809	ENSMUSG00000033389	false
810	ENSMUSG00000033222	false
811	ENSMUSG00000033200	false
812	ENSMUSG00000033177	false
813	ENSMUSG00000033032	false
814	ENSMUSG00000033022	false
815	ENSMUSG00000032854	false
816	ENSMUSG00000032852	false
817	ENSMUSG00000032586	false
818	ENSMUSG00000032558	false
819	ENSMUSG00000032532	false
820	ENSMUSG00000032502	false
821	ENSMUSG00000032482	false
822	ENSMUSG00000032420	false
823	ENSMUSG00000032417	false
824	ENSMUSG00000032397	false
825	ENSMUSG00000032346	false
826	ENSMUSG00000032315	false
827	ENSMUSG00000032289	false
828	ENSMUSG00000032278	false
829	ENSMUSG00000032238	false
830	ENSMUSG00000032232	false
831	ENSMUSG00000032186	false
832	ENSMUSG00000032113	false
833	ENSMUSG00000032092	false
834	ENSMUSG00000032035	false
835	ENSMUSG00000032034	false
836	ENSMUSG00000032017	false
837	ENSMUSG00000032015	false
838	ENSMUSG00000031981	false
839	ENSMUSG00000031980	false
840	ENSMUSG00000031919	false
841	ENSMUSG00000031849	false
842	ENSMUSG00000031844	false
843	ENSMUSG00000031778	false
844	ENSMUSG00000031669	false
845	ENSMUSG00000031626	false
846	ENSMUSG00000031562	false
847	ENSMUSG00000031558	false
848	ENSMUSG00000031410	false
849	ENSMUSG00000031387	false
850	ENSMUSG00000031373	false
851	ENSMUSG00000031355	false
852	ENSMUSG00000031284	false
853	ENSMUSG00000031262	false
854	ENSMUSG00000031227	false
855	ENSMUSG00000031220	false
856	ENSMUSG00000031150	false
857	ENSMUSG00000031144	false
858	ENSMUSG00000030978	false
859	ENSMUSG00000030935	false
860	ENSMUSG00000030787	false
861	ENSMUSG00000030772	false
862	ENSMUSG00000030616	false
863	ENSMUSG00000030543	false
864	ENSMUSG00000030401	false
865	ENSMUSG00000030353	false
866	ENSMUSG00000030340	false
867	ENSMUSG00000030287	false
868	ENSMUSG00000030137	false
869	ENSMUSG00000030110	false
870	ENSMUSG00000030087	false
871	ENSMUSG00000030048	false
872	ENSMUSG00000029865	false
873	ENSMUSG00000029862	false
874	ENSMUSG00000029765	false
875	ENSMUSG00000029762	false
876	ENSMUSG00000029716	false
877	ENSMUSG00000029712	false
878	ENSMUSG00000029700	false
879	ENSMUSG00000029596	false
880	ENSMUSG00000029591	false
881	ENSMUSG00000029570	false
882	ENSMUSG00000029541	false
883	ENSMUSG00000029436	false
884	ENSMUSG00000029335	false
885	ENSMUSG00000029279	false
886	ENSMUSG00000029195	false
887	ENSMUSG00000029134	false
888	ENSMUSG00000029123	false
889	ENSMUSG00000029121	false
890	ENSMUSG00000029101	false
891	ENSMUSG00000029096	false
892	ENSMUSG00000029054	false
893	ENSMUSG00000028860	false
894	ENSMUSG00000028785	false
895	ENSMUSG00000028766	false
896	ENSMUSG00000028631	false
897	ENSMUSG00000028597	false
898	ENSMUSG00000028555	false
899	ENSMUSG00000028539	false
900	ENSMUSG00000028532	false
901	ENSMUSG00000028457	false
902	ENSMUSG00000028444	false
903	ENSMUSG00000028427	false
904	ENSMUSG00000028415	false
905	ENSMUSG00000028391	false
906	ENSMUSG00000028389	false
907	ENSMUSG00000028356	false
908	ENSMUSG00000028289	false
909	ENSMUSG00000028255	false
910	ENSMUSG00000028236	false
911	ENSMUSG00000028226	false
912	ENSMUSG00000028111	false
913	ENSMUSG00000028088	false
914	ENSMUSG00000028068	false
915	ENSMUSG00000028039	false
916	ENSMUSG00000028019	false
917	ENSMUSG00000028008	false
918	ENSMUSG00000027876	false
919	ENSMUSG00000027801	false
920	ENSMUSG00000027797	false
921	ENSMUSG00000027748	false
922	ENSMUSG00000027684	false
923	ENSMUSG00000027674	false
924	ENSMUSG00000027635	false
925	ENSMUSG00000027612	false
926	ENSMUSG00000027581	false
927	ENSMUSG00000027379	false
928	ENSMUSG00000027360	false
929	ENSMUSG00000027203	false
930	ENSMUSG00000027074	false
931	ENSMUSG00000026828	false
932	ENSMUSG00000026782	false
933	ENSMUSG00000026765	false
934	ENSMUSG00000026737	false
935	ENSMUSG00000026726	false
936	ENSMUSG00000026686	false
937	ENSMUSG00000026620	false
938	ENSMUSG00000026610	false
939	ENSMUSG00000026520	false
940	ENSMUSG00000026483	false
941	ENSMUSG00000026482	false
942	ENSMUSG00000026475	false
943	ENSMUSG00000026442	false
944	ENSMUSG00000026347	false
945	ENSMUSG00000026322	false
946	ENSMUSG00000026321	false
947	ENSMUSG00000026303	false
948	ENSMUSG00000026288	false
949	ENSMUSG00000026255	false
950	ENSMUSG00000026163	false
951	ENSMUSG00000026131	false
952	ENSMUSG00000025991	false
953	ENSMUSG00000025867	false
954	ENSMUSG00000025739	false
955	ENSMUSG00000025701	false
956	ENSMUSG00000025658	false
957	ENSMUSG00000025608	false
958	ENSMUSG00000025602	false
959	ENSMUSG00000025582	false
960	ENSMUSG00000025515	false
961	ENSMUSG00000025479	false
962	ENSMUSG00000025432	false
963	ENSMUSG00000025405	false
964	ENSMUSG00000025395	false
965	ENSMUSG00000025347	false
966	ENSMUSG00000025329	false
967	ENSMUSG00000025268	false
968	ENSMUSG00000025265	false
969	ENSMUSG00000025175	false
970	ENSMUSG00000025089	false
971	ENSMUSG00000025085	false
972	ENSMUSG00000025075	false
973	ENSMUSG00000025026	false
974	ENSMUSG00000025020	false
975	ENSMUSG00000025002	false
976	ENSMUSG00000024972	false
977	ENSMUSG00000024912	false
978	ENSMUSG00000024905	false
979	ENSMUSG00000024873	false
980	ENSMUSG00000024553	false
981	ENSMUSG00000024548	false
982	ENSMUSG00000024512	false
983	ENSMUSG00000024511	false
984	ENSMUSG00000024501	false
985	ENSMUSG00000024411	false
986	ENSMUSG00000024386	false
987	ENSMUSG00000024352	false
988	ENSMUSG00000024304	false
989	ENSMUSG00000024302	false
990	ENSMUSG00000024225	false
991	ENSMUSG00000024215	false
992	ENSMUSG00000024177	false
993	ENSMUSG00000024112	false
994	ENSMUSG00000024074	false
995	ENSMUSG00000024029	false
996	ENSMUSG00000024028	false
997	ENSMUSG00000023966	false
998	ENSMUSG00000023963	false
999	ENSMUSG00000023886	false
1000	ENSMUSG00000023387	false
1001	ENSMUSG00000023247	false
1002	ENSMUSG00000023191	false
1003	ENSMUSG00000023066	false
1004	ENSMUSG00000022978	false
1005	ENSMUSG00000022941	false
1006	ENSMUSG00000022844	false
1007	ENSMUSG00000022829	false
1008	ENSMUSG00000022773	false
1009	ENSMUSG00000022696	false
1010	ENSMUSG00000022598	false
1011	ENSMUSG00000022537	false
1012	ENSMUSG00000022512	false
1013	ENSMUSG00000022505	false
1014	ENSMUSG00000022456	false
1015	ENSMUSG00000022332	false
1016	ENSMUSG00000022211	false
1017	ENSMUSG00000022034	false
1018	ENSMUSG00000022033	false
1019	ENSMUSG00000022026	false
1020	ENSMUSG00000021986	false
1021	ENSMUSG00000021904	false
1022	ENSMUSG00000021838	false
1023	ENSMUSG00000021730	false
1024	ENSMUSG00000021700	false
1025	ENSMUSG00000021684	false
1026	ENSMUSG00000021604	false
1027	ENSMUSG00000021572	false
1028	ENSMUSG00000021539	false
1029	ENSMUSG00000021509	false
1030	ENSMUSG00000021403	false
1031	ENSMUSG00000021364	false
1032	ENSMUSG00000021265	false
1033	ENSMUSG00000021175	false
1034	ENSMUSG00000021136	false
1035	ENSMUSG00000021013	false
1036	ENSMUSG00000020953	false
1037	ENSMUSG00000020900	false
1038	ENSMUSG00000020886	false
1039	ENSMUSG00000020732	false
1040	ENSMUSG00000020717	false
1041	ENSMUSG00000020684	false
1042	ENSMUSG00000020682	false
1043	ENSMUSG00000020635	false
1044	ENSMUSG00000020576	false
1045	ENSMUSG00000020571	false
1046	ENSMUSG00000020469	false
1047	ENSMUSG00000020462	false
1048	ENSMUSG00000020431	false
1049	ENSMUSG00000020405	false
1050	ENSMUSG00000020381	false
1051	ENSMUSG00000020333	false
1052	ENSMUSG00000020256	false
1053	ENSMUSG00000020178	false
1054	ENSMUSG00000020176	false
1055	ENSMUSG00000020175	false
1056	ENSMUSG00000020151	false
1057	ENSMUSG00000020140	false
1058	ENSMUSG00000020086	false
1059	ENSMUSG00000020044	false
1060	ENSMUSG00000020019	false
1061	ENSMUSG00000019992	false
1062	ENSMUSG00000019989	false
1063	ENSMUSG00000019945	false
1064	ENSMUSG00000019944	false
1065	ENSMUSG00000019906	false
1066	ENSMUSG00000019890	false
1067	ENSMUSG00000019876	false
1068	ENSMUSG00000019775	false
1069	ENSMUSG00000019235	false
1070	ENSMUSG00000019122	false
1071	ENSMUSG00000018865	false
1072	ENSMUSG00000018672	false
1073	ENSMUSG00000018620	false
1074	ENSMUSG00000018554	false
1075	ENSMUSG00000018486	false
1076	ENSMUSG00000018470	false
1077	ENSMUSG00000018339	false
1078	ENSMUSG00000017943	false
1079	ENSMUSG00000017692	false
1080	ENSMUSG00000017639	false
1081	ENSMUSG00000017607	false
1082	ENSMUSG00000017211	false
1083	ENSMUSG00000017204	false
1084	ENSMUSG00000016763	false
1085	ENSMUSG00000015568	false
1086	ENSMUSG00000015222	false
1087	ENSMUSG00000014602	false
1088	ENSMUSG00000013921	false
1089	ENSMUSG00000011256	false
1090	ENSMUSG00000010803	false
1091	ENSMUSG00000010307	false
1092	ENSMUSG00000010066	false
1093	ENSMUSG00000009731	false
1094	ENSMUSG00000009378	false
1095	ENSMUSG00000008734	false
1096	ENSMUSG00000008461	false
1097	ENSMUSG00000007783	false
1098	ENSMUSG00000007379	false
1099	ENSMUSG00000007080	false
1100	ENSMUSG00000006675	false
1101	ENSMUSG00000006651	false
1102	ENSMUSG00000006386	false
1103	ENSMUSG00000006342	false
1104	ENSMUSG00000005470	false
1105	ENSMUSG00000004654	false
1106	ENSMUSG00000004347	false
1107	ENSMUSG00000004038	false
1108	ENSMUSG00000003418	false
1109	ENSMUSG00000003411	false
1110	ENSMUSG00000003355	false
1111	ENSMUSG00000002504	false
1112	ENSMUSG00000002341	false
1113	ENSMUSG00000002233	false
1114	ENSMUSG00000002107	false
1115	ENSMUSG00000002006	false
1116	ENSMUSG00000001901	false
1117	ENSMUSG00000001802	false
1118	ENSMUSG00000001525	false
1119	ENSMUSG00000001435	false
1120	ENSMUSG00000001333	false
1121	ENSMUSG00000001228	false
1122	ENSMUSG00000000884	false
1123	ENSMUSG00000000530	false
1124	ENSMUSG00000000416	false
1125	ENSMUSG00000000296	false
1126	ENSMUSG00000000253	false
1127	ENSMUSG00000000202	false
1128	ENSMUSG00000000120	false
1129	ENSMUSG00000035451	false
1130	ENSMUSG00000021379	false
1131	ENSMUSG00000073043	false
1132	ENSMUSG00000020423	false
1133	ENSMUSG00000093805	false
1134	ENSMUSG00000063810	false
1135	ENSMUSG00000054582	false
1136	ENSMUSG00000042532	false
1137	ENSMUSG00000042155	false
1138	ENSMUSG00000041168	false
1139	ENSMUSG00000040231	false
1140	ENSMUSG00000040046	false
1141	ENSMUSG00000039013	false
1142	ENSMUSG00000038146	false
1143	ENSMUSG00000034818	false
1144	ENSMUSG00000033029	false
1145	ENSMUSG00000031532	false
1146	ENSMUSG00000028693	false
1147	ENSMUSG00000028527	false
1148	ENSMUSG00000026272	false
1149	ENSMUSG00000024151	false
1150	ENSMUSG00000022857	false
1151	ENSMUSG00000009545	false
1152	ENSMUSG00000005672	false
1153	ENSMUSG00000002055	false
1154	ENSMUSG00000000125	false
1155	ENSMUSG00000094626	false
1156	ENSMUSG00000066720	false
1157	ENSMUSG00000064272	false
1158	ENSMUSG00000058070	false
1159	ENSMUSG00000055197	false
1160	ENSMUSG00000049154	false
1161	ENSMUSG00000047250	false
1162	ENSMUSG00000044988	false
1163	ENSMUSG00000041798	false
1164	ENSMUSG00000041141	false
1165	ENSMUSG00000040543	false
1166	ENSMUSG00000037953	false
1167	ENSMUSG00000036915	false
1168	ENSMUSG00000036764	false
1169	ENSMUSG00000032507	false
1170	ENSMUSG00000032338	false
1171	ENSMUSG00000031853	false
1172	ENSMUSG00000031790	false
1173	ENSMUSG00000030897	false
1174	ENSMUSG00000029420	false
1175	ENSMUSG00000025876	false
1176	ENSMUSG00000024897	false
1177	ENSMUSG00000024175	false
1178	ENSMUSG00000022018	false
1179	ENSMUSG00000021303	false
1180	ENSMUSG00000021198	false
1181	ENSMUSG00000019124	false
1182	ENSMUSG00000010825	false
1183	ENSMUSG00000019900	false
1184	ENSMUSG00000101605	false
1185	ENSMUSG00000090353	false
1186	ENSMUSG00000079654	false
1187	ENSMUSG00000079442	false
1188	ENSMUSG00000078984	false
1189	ENSMUSG00000074896	false
1190	ENSMUSG00000074345	false
1191	ENSMUSG00000073207	false
1192	ENSMUSG00000071537	false
1193	ENSMUSG00000071203	false
1194	ENSMUSG00000071103	false
1195	ENSMUSG00000069805	false
1196	ENSMUSG00000069793	false
1197	ENSMUSG00000069515	false
1198	ENSMUSG00000069184	false
1199	ENSMUSG00000068877	false
1200	ENSMUSG00000067297	false
1201	ENSMUSG00000066324	false
1202	ENSMUSG00000065952	false
1203	ENSMUSG00000064140	false
1204	ENSMUSG00000062593	false
1205	ENSMUSG00000060548	false
1206	ENSMUSG00000060519	false
1207	ENSMUSG00000060429	false
1208	ENSMUSG00000058672	false
1209	ENSMUSG00000058216	false
1210	ENSMUSG00000056592	false
1211	ENSMUSG00000055976	false
1212	ENSMUSG00000054200	false
1213	ENSMUSG00000053617	false
1214	ENSMUSG00000053182	false
1215	ENSMUSG00000052631	false
1216	ENSMUSG00000050097	false
1217	ENSMUSG00000050064	false
1218	ENSMUSG00000049723	false
1219	ENSMUSG00000049588	false
1220	ENSMUSG00000049436	false
1221	ENSMUSG00000049313	false
1222	ENSMUSG00000049281	false
1223	ENSMUSG00000048752	false
1224	ENSMUSG00000048612	false
1225	ENSMUSG00000048373	false
1226	ENSMUSG00000048329	false
1227	ENSMUSG00000048216	false
1228	ENSMUSG00000048022	false
1229	ENSMUSG00000047181	false
1230	ENSMUSG00000047139	false
1231	ENSMUSG00000046711	false
1232	ENSMUSG00000046410	false
1233	ENSMUSG00000045827	false
1234	ENSMUSG00000045817	false
1235	ENSMUSG00000045328	false
1236	ENSMUSG00000045094	false
1237	ENSMUSG00000044456	false
1238	ENSMUSG00000044317	false
1239	ENSMUSG00000043953	false
1240	ENSMUSG00000043885	false
1241	ENSMUSG00000043432	false
1242	ENSMUSG00000043391	false
1243	ENSMUSG00000042564	false
1244	ENSMUSG00000042109	false
1245	ENSMUSG00000041859	false
1246	ENSMUSG00000041439	false
1247	ENSMUSG00000041202	false
1248	ENSMUSG00000040717	false
1249	ENSMUSG00000040624	false
1250	ENSMUSG00000040528	false
1251	ENSMUSG00000040380	false
1252	ENSMUSG00000039676	false
1253	ENSMUSG00000038777	false
1254	ENSMUSG00000038745	false
1255	ENSMUSG00000038599	false
1256	ENSMUSG00000038580	false
1257	ENSMUSG00000038486	false
1258	ENSMUSG00000038463	false
1259	ENSMUSG00000038180	false
1260	ENSMUSG00000037991	false
1261	ENSMUSG00000037868	false
1262	ENSMUSG00000037419	false
1263	ENSMUSG00000037032	false
1264	ENSMUSG00000036887	false
1265	ENSMUSG00000036777	false
1266	ENSMUSG00000036745	false
1267	ENSMUSG00000036036	false
1268	ENSMUSG00000035561	false
1269	ENSMUSG00000035164	false
1270	ENSMUSG00000034855	false
1271	ENSMUSG00000034349	false
1272	ENSMUSG00000033684	false
1273	ENSMUSG00000032839	false
1274	ENSMUSG00000032661	false
1275	ENSMUSG00000032549	false
1276	ENSMUSG00000031451	false
1277	ENSMUSG00000031403	false
1278	ENSMUSG00000031173	false
1279	ENSMUSG00000030717	false
1280	ENSMUSG00000030359	false
1281	ENSMUSG00000030329	false
1282	ENSMUSG00000030263	false
1283	ENSMUSG00000029919	false
1284	ENSMUSG00000029706	false
1285	ENSMUSG00000029561	false
1286	ENSMUSG00000029370	false
1287	ENSMUSG00000029154	false
1288	ENSMUSG00000028972	false
1289	ENSMUSG00000028749	false
1290	ENSMUSG00000028551	false
1291	ENSMUSG00000028403	false
1292	ENSMUSG00000028076	false
1293	ENSMUSG00000028057	false
1294	ENSMUSG00000027938	false
1295	ENSMUSG00000027931	false
1296	ENSMUSG00000027890	false
1297	ENSMUSG00000027750	false
1298	ENSMUSG00000027375	false
1299	ENSMUSG00000026955	false
1300	ENSMUSG00000026815	false
1301	ENSMUSG00000026700	false
1302	ENSMUSG00000026657	false
1303	ENSMUSG00000026646	false
1304	ENSMUSG00000026102	false
1305	ENSMUSG00000026072	false
1306	ENSMUSG00000026068	false
1307	ENSMUSG00000025810	false
1308	ENSMUSG00000025507	false
1309	ENSMUSG00000025492	false
1310	ENSMUSG00000025059	false
1311	ENSMUSG00000024901	false
1312	ENSMUSG00000024810	false
1313	ENSMUSG00000024646	false
1314	ENSMUSG00000024621	false
1315	ENSMUSG00000024613	false
1316	ENSMUSG00000023908	false
1317	ENSMUSG00000023827	false
1318	ENSMUSG00000023473	false
1319	ENSMUSG00000023050	false
1320	ENSMUSG00000022208	false
1321	ENSMUSG00000021720	false
1322	ENSMUSG00000021587	false
1323	ENSMUSG00000021396	false
1324	ENSMUSG00000021281	false
1325	ENSMUSG00000021256	false
1326	ENSMUSG00000020620	false
1327	ENSMUSG00000020581	false
1328	ENSMUSG00000020218	false
1329	ENSMUSG00000017868	false
1330	ENSMUSG00000017144	false
1331	ENSMUSG00000017057	false
1332	ENSMUSG00000017009	false
1333	ENSMUSG00000016200	false
1334	ENSMUSG00000015962	false
1335	ENSMUSG00000015396	false
1336	ENSMUSG00000013698	false
1337	ENSMUSG00000013523	false
1338	ENSMUSG00000012017	false
1339	ENSMUSG00000009246	false
1340	ENSMUSG00000009108	false
1341	ENSMUSG00000009092	false
1342	ENSMUSG00000006546	false
1343	ENSMUSG00000005873	false
1344	ENSMUSG00000004952	false
1345	ENSMUSG00000004709	false
1346	ENSMUSG00000003541	false
1347	ENSMUSG00000003469	false
1348	ENSMUSG00000003228	false
1349	ENSMUSG00000002668	false
1350	ENSMUSG00000001761	false
1351	ENSMUSG00000001281	false
1352	ENSMUSG00000000555	false
1353	ENSMUSG00000018623	false
1354	ENSMUSG00000017724	false
1355	ENSMUSG00000056758	false
1356	ENSMUSG00000015468	false
1357	ENSMUSG00000092083	false
1358	ENSMUSG00000074652	false
1359	ENSMUSG00000070867	false
1360	ENSMUSG00000069255	false
1361	ENSMUSG00000068196	false
1362	ENSMUSG00000063568	false
1363	ENSMUSG00000062078	false
1364	ENSMUSG00000061171	false
1365	ENSMUSG00000057716	false
1366	ENSMUSG00000055485	false
1367	ENSMUSG00000052353	false
1368	ENSMUSG00000048349	false
1369	ENSMUSG00000045518	false
1370	ENSMUSG00000045312	false
1371	ENSMUSG00000044288	false
1372	ENSMUSG00000042258	false
1373	ENSMUSG00000033278	false
1374	ENSMUSG00000032773	false
1375	ENSMUSG00000032356	false
1376	ENSMUSG00000032285	false
1377	ENSMUSG00000031756	false
1378	ENSMUSG00000031586	false
1379	ENSMUSG00000028986	false
1380	ENSMUSG00000027524	false
1381	ENSMUSG00000026959	false
1382	ENSMUSG00000026527	false
1383	ENSMUSG00000024743	false
1384	ENSMUSG00000024533	false
1385	ENSMUSG00000024366	false
1386	ENSMUSG00000023092	false
1387	ENSMUSG00000022489	false
1388	ENSMUSG00000022422	false
1389	ENSMUSG00000021685	false
1390	ENSMUSG00000021061	false
1391	ENSMUSG00000020427	false
1392	ENSMUSG00000019232	false
1393	ENSMUSG00000010021	false
1394	ENSMUSG00000006586	false
1395	ENSMUSG00000001985	false
1396	ENSMUSG00000012350	false
1397	ENSMUSG00000059588	false
1398	ENSMUSG00000038530	false
1399	ENSMUSG00000098557	false
1400	ENSMUSG00000096054	false
1401	ENSMUSG00000092486	false
1402	ENSMUSG00000090626	false
1403	ENSMUSG00000089789	false
1404	ENSMUSG00000079685	false
1405	ENSMUSG00000079471	false
1406	ENSMUSG00000079038	false
1407	ENSMUSG00000078949	false
1408	ENSMUSG00000078349	false
1409	ENSMUSG00000075702	false
1410	ENSMUSG00000072620	false
1411	ENSMUSG00000072082	false
1412	ENSMUSG00000071719	false
1413	ENSMUSG00000070407	false
1414	ENSMUSG00000070337	false
1415	ENSMUSG00000069114	false
1416	ENSMUSG00000068735	false
1417	ENSMUSG00000068101	false
1418	ENSMUSG00000066705	false
1419	ENSMUSG00000064267	false
1420	ENSMUSG00000061455	false
1421	ENSMUSG00000060671	false
1422	ENSMUSG00000059412	false
1423	ENSMUSG00000059060	false
1424	ENSMUSG00000055407	false
1425	ENSMUSG00000054640	false
1426	ENSMUSG00000053846	false
1427	ENSMUSG00000051359	false
1428	ENSMUSG00000051344	false
1429	ENSMUSG00000051079	false
1430	ENSMUSG00000050395	false
1431	ENSMUSG00000049858	false
1432	ENSMUSG00000049807	false
1433	ENSMUSG00000049608	false
1434	ENSMUSG00000047878	false
1435	ENSMUSG00000047230	false
1436	ENSMUSG00000045751	false
1437	ENSMUSG00000045667	false
1438	ENSMUSG00000045007	false
1439	ENSMUSG00000044933	false
1440	ENSMUSG00000044734	false
1441	ENSMUSG00000044340	false
1442	ENSMUSG00000044337	false
1443	ENSMUSG00000044072	false
1444	ENSMUSG00000041390	false
1445	ENSMUSG00000040990	false
1446	ENSMUSG00000040563	false
1447	ENSMUSG00000040035	false
1448	ENSMUSG00000039943	false
1449	ENSMUSG00000039395	false
1450	ENSMUSG00000039323	false
1451	ENSMUSG00000039304	false
1452	ENSMUSG00000038648	false
1453	ENSMUSG00000038390	false
1454	ENSMUSG00000036892	false
1455	ENSMUSG00000036223	false
1456	ENSMUSG00000035967	false
1457	ENSMUSG00000035863	false
1458	ENSMUSG00000035849	false
1459	ENSMUSG00000035692	false
1460	ENSMUSG00000035506	false
1461	ENSMUSG00000035095	false
1462	ENSMUSG00000034906	false
1463	ENSMUSG00000034768	false
1464	ENSMUSG00000034353	false
1465	ENSMUSG00000033970	false
1466	ENSMUSG00000033752	false
1467	ENSMUSG00000032733	false
1468	ENSMUSG00000032489	false
1469	ENSMUSG00000032470	false
1470	ENSMUSG00000032400	false
1471	ENSMUSG00000032251	false
1472	ENSMUSG00000032120	false
1473	ENSMUSG00000031957	false
1474	ENSMUSG00000031730	false
1475	ENSMUSG00000031448	false
1476	ENSMUSG00000031155	false
1477	ENSMUSG00000030866	false
1478	ENSMUSG00000030677	false
1479	ENSMUSG00000030659	false
1480	ENSMUSG00000030411	false
1481	ENSMUSG00000029490	false
1482	ENSMUSG00000029177	false
1483	ENSMUSG00000029102	false
1484	ENSMUSG00000028949	false
1485	ENSMUSG00000028926	false
1486	ENSMUSG00000028825	false
1487	ENSMUSG00000028763	false
1488	ENSMUSG00000028573	false
1489	ENSMUSG00000027661	false
1490	ENSMUSG00000027499	false
1491	ENSMUSG00000027456	false
1492	ENSMUSG00000027435	false
1493	ENSMUSG00000027420	false
1494	ENSMUSG00000027346	false
1495	ENSMUSG00000027018	false
1496	ENSMUSG00000026930	false
1497	ENSMUSG00000026864	false
1498	ENSMUSG00000026669	false
1499	ENSMUSG00000026480	false
1500	ENSMUSG00000026430	false
1501	ENSMUSG00000026380	false
1502	ENSMUSG00000026355	false
1503	ENSMUSG00000025747	false
1504	ENSMUSG00000025742	false
1505	ENSMUSG00000025422	false
1506	ENSMUSG00000025151	false
1507	ENSMUSG00000024935	false
1508	ENSMUSG00000024827	false
1509	ENSMUSG00000024807	false
1510	ENSMUSG00000024423	false
1511	ENSMUSG00000024030	false
1512	ENSMUSG00000024013	false
1513	ENSMUSG00000023393	false
1514	ENSMUSG00000022881	false
1515	ENSMUSG00000022840	false
1516	ENSMUSG00000022686	false
1517	ENSMUSG00000022021	false
1518	ENSMUSG00000021559	false
1519	ENSMUSG00000020641	false
1520	ENSMUSG00000020424	false
1521	ENSMUSG00000020226	false
1522	ENSMUSG00000020182	false
1523	ENSMUSG00000020135	false
1524	ENSMUSG00000020131	false
1525	ENSMUSG00000019214	false
1526	ENSMUSG00000019188	false
1527	ENSMUSG00000018169	false
1528	ENSMUSG00000013846	false
1529	ENSMUSG00000007989	false
1530	ENSMUSG00000006930	false
1531	ENSMUSG00000006575	false
1532	ENSMUSG00000004951	false
1533	ENSMUSG00000003436	false
1534	ENSMUSG00000003283	false
1535	ENSMUSG00000001025	false
1536	ENSMUSG00000009248	false
1537	ENSMUSG00000008398	false
1538	ENSMUSG00000074183	false
1539	ENSMUSG00000069814	false
1540	ENSMUSG00000069227	false
1541	ENSMUSG00000066152	false
1542	ENSMUSG00000054871	false
1543	ENSMUSG00000051498	false
1544	ENSMUSG00000048534	false
1545	ENSMUSG00000047415	false
1546	ENSMUSG00000046805	false
1547	ENSMUSG00000046460	false
1548	ENSMUSG00000042686	false
1549	ENSMUSG00000042404	false
1550	ENSMUSG00000040136	false
1551	ENSMUSG00000037568	false
1552	ENSMUSG00000032978	false
1553	ENSMUSG00000028927	false
1554	ENSMUSG00000025498	false
1555	ENSMUSG00000021194	false
1556	ENSMUSG00000020894	false
1557	ENSMUSG00000020472	false
1558	ENSMUSG00000008193	false
1559	ENSMUSG00000023216	false
1560	ENSMUSG00000006362	false
1561	ENSMUSG00000042873	false
1562	ENSMUSG00000042115	false
1563	ENSMUSG00000041836	false
1564	ENSMUSG00000041548	false
1565	ENSMUSG00000026833	false
1566	ENSMUSG00000025969	false
1567	ENSMUSG00000025938	false
1568	ENSMUSG00000021123	false
1569	ENSMUSG00000015401	false
1570	ENSMUSG00000004099	false
1571	ENSMUSG00000094651	false
1572	ENSMUSG00000070532	false
1573	ENSMUSG00000070287	false
1574	ENSMUSG00000067925	false
1575	ENSMUSG00000066952	false
1576	ENSMUSG00000064090	false
1577	ENSMUSG00000062859	false
1578	ENSMUSG00000059991	false
1579	ENSMUSG00000059742	false
1580	ENSMUSG00000058624	false
1581	ENSMUSG00000058297	false
1582	ENSMUSG00000056531	false
1583	ENSMUSG00000056222	false
1584	ENSMUSG00000053963	false
1585	ENSMUSG00000053216	false
1586	ENSMUSG00000051177	false
1587	ENSMUSG00000051166	false
1588	ENSMUSG00000051111	false
1589	ENSMUSG00000049148	false
1590	ENSMUSG00000048970	false
1591	ENSMUSG00000047907	false
1592	ENSMUSG00000047298	false
1593	ENSMUSG00000046546	false
1594	ENSMUSG00000046242	false
1595	ENSMUSG00000045838	false
1596	ENSMUSG00000043639	false
1597	ENSMUSG00000043068	false
1598	ENSMUSG00000042734	false
1599	ENSMUSG00000042429	false
1600	ENSMUSG00000041633	false
1601	ENSMUSG00000040852	false
1602	ENSMUSG00000039934	false
1603	ENSMUSG00000039372	false
1604	ENSMUSG00000038879	false
1605	ENSMUSG00000038456	false
1606	ENSMUSG00000038451	false
1607	ENSMUSG00000038255	false
1608	ENSMUSG00000037664	false
1609	ENSMUSG00000037580	false
1610	ENSMUSG00000036913	false
1611	ENSMUSG00000035606	false
1612	ENSMUSG00000035509	false
1613	ENSMUSG00000035357	false
1614	ENSMUSG00000035279	false
1615	ENSMUSG00000035226	false
1616	ENSMUSG00000034774	false
1617	ENSMUSG00000034773	false
1618	ENSMUSG00000034579	false
1619	ENSMUSG00000034275	false
1620	ENSMUSG00000033900	false
1621	ENSMUSG00000033740	false
1622	ENSMUSG00000033307	false
1623	ENSMUSG00000033061	false
1624	ENSMUSG00000032548	false
1625	ENSMUSG00000032297	false
1626	ENSMUSG00000032076	false
1627	ENSMUSG00000031791	false
1628	ENSMUSG00000031788	false
1629	ENSMUSG00000031760	false
1630	ENSMUSG00000031757	false
1631	ENSMUSG00000030406	false
1632	ENSMUSG00000030074	false
1633	ENSMUSG00000028843	false
1634	ENSMUSG00000028186	false
1635	ENSMUSG00000027544	false
1636	ENSMUSG00000027273	false
1637	ENSMUSG00000027254	false
1638	ENSMUSG00000026961	false
1639	ENSMUSG00000026764	false
1640	ENSMUSG00000026443	false
1641	ENSMUSG00000026335	false
1642	ENSMUSG00000025551	false
1643	ENSMUSG00000025091	false
1644	ENSMUSG00000025064	false
1645	ENSMUSG00000024552	false
1646	ENSMUSG00000024033	false
1647	ENSMUSG00000023913	false
1648	ENSMUSG00000022962	false
1649	ENSMUSG00000022769	false
1650	ENSMUSG00000022054	false
1651	ENSMUSG00000021999	false
1652	ENSMUSG00000021846	false
1653	ENSMUSG00000021337	false
1654	ENSMUSG00000020808	false
1655	ENSMUSG00000020303	false
1656	ENSMUSG00000020121	false
1657	ENSMUSG00000019761	false
1658	ENSMUSG00000017652	false
1659	ENSMUSG00000014351	false
1660	ENSMUSG00000014164	false
1661	ENSMUSG00000010830	false
1662	ENSMUSG00000010505	false
1663	ENSMUSG00000006435	false
1664	ENSMUSG00000005360	false
1665	ENSMUSG00000004366	false
1666	ENSMUSG00000004113	false
1667	ENSMUSG00000000560	false
1668	ENSMUSG00000000394	false
1669	ENSMUSG00000000126	false
1670	ENSMUSG00000038793	false
1671	ENSMUSG00000021835	false
1672	ENSMUSG00000001819	false
1673	ENSMUSG00000019846	false
1674	ENSMUSG00000001517	false
1675	ENSMUSG00000000214	false
1676	ENSMUSG00000000942	false
1677	ENSMUSG00000110206	false
1678	ENSMUSG00000110105	false
1679	ENSMUSG00000108348	false
1680	ENSMUSG00000096847	false
1681	ENSMUSG00000094928	false
1682	ENSMUSG00000087651	false
1683	ENSMUSG00000079553	false
1684	ENSMUSG00000079339	false
1685	ENSMUSG00000079037	false
1686	ENSMUSG00000078773	false
1687	ENSMUSG00000078650	false
1688	ENSMUSG00000078612	false
1689	ENSMUSG00000078202	false
1690	ENSMUSG00000075543	false
1691	ENSMUSG00000075502	false
1692	ENSMUSG00000074892	false
1693	ENSMUSG00000074802	false
1694	ENSMUSG00000074785	false
1695	ENSMUSG00000074715	false
1696	ENSMUSG00000074604	false
1697	ENSMUSG00000074476	false
1698	ENSMUSG00000074217	false
1699	ENSMUSG00000074063	false
1700	ENSMUSG00000073409	false
1701	ENSMUSG00000072235	false
1702	ENSMUSG00000072115	false
1703	ENSMUSG00000071547	false
1704	ENSMUSG00000070802	false
1705	ENSMUSG00000070733	false
1706	ENSMUSG00000070576	false
1707	ENSMUSG00000070498	false
1708	ENSMUSG00000070284	false
1709	ENSMUSG00000069910	false
1710	ENSMUSG00000067813	false
1711	ENSMUSG00000064262	false
1712	ENSMUSG00000064215	false
1713	ENSMUSG00000062760	false
1714	ENSMUSG00000062248	false
1715	ENSMUSG00000062175	false
1716	ENSMUSG00000062070	false
1717	ENSMUSG00000061718	false
1718	ENSMUSG00000061607	false
1719	ENSMUSG00000061414	false
1720	ENSMUSG00000060550	false
1721	ENSMUSG00000060063	false
1722	ENSMUSG00000059939	false
1723	ENSMUSG00000059713	false
1724	ENSMUSG00000059336	false
1725	ENSMUSG00000059013	false
1726	ENSMUSG00000058975	false
1727	ENSMUSG00000058799	false
1728	ENSMUSG00000058290	false
1729	ENSMUSG00000058145	false
1730	ENSMUSG00000058135	false
1731	ENSMUSG00000058006	false
1732	ENSMUSG00000057335	false
1733	ENSMUSG00000057137	false
1734	ENSMUSG00000057069	false
1735	ENSMUSG00000056888	false
1736	ENSMUSG00000056602	false
1737	ENSMUSG00000056185	false
1738	ENSMUSG00000056069	false
1739	ENSMUSG00000055805	false
1740	ENSMUSG00000055612	false
1741	ENSMUSG00000055296	false
1742	ENSMUSG00000054920	false
1743	ENSMUSG00000054893	false
1744	ENSMUSG00000054717	false
1745	ENSMUSG00000054612	false
1746	ENSMUSG00000054342	false
1747	ENSMUSG00000054321	false
1748	ENSMUSG00000053581	false
1749	ENSMUSG00000053580	false
1750	ENSMUSG00000053460	false
1751	ENSMUSG00000053414	false
1752	ENSMUSG00000053334	false
1753	ENSMUSG00000053137	false
1754	ENSMUSG00000052384	false
1755	ENSMUSG00000052331	false
1756	ENSMUSG00000052135	false
1757	ENSMUSG00000052117	false
1758	ENSMUSG00000052087	false
1759	ENSMUSG00000052085	false
1760	ENSMUSG00000051457	false
1761	ENSMUSG00000051335	false
1762	ENSMUSG00000051278	false
1763	ENSMUSG00000051220	false
1764	ENSMUSG00000050357	false
1765	ENSMUSG00000050335	false
1766	ENSMUSG00000050132	false
1767	ENSMUSG00000050052	false
1768	ENSMUSG00000049907	false
1769	ENSMUSG00000049892	false
1770	ENSMUSG00000049350	false
1771	ENSMUSG00000049288	false
1772	ENSMUSG00000048965	false
1773	ENSMUSG00000048779	false
1774	ENSMUSG00000048473	false
1775	ENSMUSG00000048450	false
1776	ENSMUSG00000048148	false
1777	ENSMUSG00000048058	false
1778	ENSMUSG00000047986	false
1779	ENSMUSG00000047867	false
1780	ENSMUSG00000047842	false
1781	ENSMUSG00000047757	false
1782	ENSMUSG00000047642	false
1783	ENSMUSG00000047534	false
1784	ENSMUSG00000047507	false
1785	ENSMUSG00000047501	false
1786	ENSMUSG00000047221	false
1787	ENSMUSG00000047205	false
1788	ENSMUSG00000047115	false
1789	ENSMUSG00000047109	false
1790	ENSMUSG00000047044	false
1791	ENSMUSG00000047003	false
1792	ENSMUSG00000046668	false
1793	ENSMUSG00000046591	false
1794	ENSMUSG00000046447	false
1795	ENSMUSG00000046223	false
1796	ENSMUSG00000045932	false
1797	ENSMUSG00000045349	false
1798	ENSMUSG00000045165	false
1799	ENSMUSG00000044966	false
1800	ENSMUSG00000044548	false
1801	ENSMUSG00000044348	false
1802	ENSMUSG00000044201	false
1803	ENSMUSG00000044177	false
1804	ENSMUSG00000044066	false
1805	ENSMUSG00000044005	false
1806	ENSMUSG00000043439	false
1807	ENSMUSG00000043154	false
1808	ENSMUSG00000043088	false
1809	ENSMUSG00000043004	false
1810	ENSMUSG00000042985	false
1811	ENSMUSG00000042684	false
1812	ENSMUSG00000042489	false
1813	ENSMUSG00000042462	false
1814	ENSMUSG00000042213	false
1815	ENSMUSG00000042029	false
1816	ENSMUSG00000041498	false
1817	ENSMUSG00000041293	false
1818	ENSMUSG00000041117	false
1819	ENSMUSG00000041075	false
1820	ENSMUSG00000041064	false
1821	ENSMUSG00000040918	false
1822	ENSMUSG00000040860	false
1823	ENSMUSG00000040856	false
1824	ENSMUSG00000040723	false
1825	ENSMUSG00000040710	false
1826	ENSMUSG00000040495	false
1827	ENSMUSG00000040483	false
1828	ENSMUSG00000040462	false
1829	ENSMUSG00000040339	false
1830	ENSMUSG00000040276	false
1831	ENSMUSG00000040209	false
1832	ENSMUSG00000040084	false
1833	ENSMUSG00000040061	false
1834	ENSMUSG00000039982	false
1835	ENSMUSG00000039814	false
1836	ENSMUSG00000039774	false
1837	ENSMUSG00000039683	false
1838	ENSMUSG00000039621	false
1839	ENSMUSG00000039530	false
1840	ENSMUSG00000039384	false
1841	ENSMUSG00000039270	false
1842	ENSMUSG00000039234	false
1843	ENSMUSG00000039168	false
1844	ENSMUSG00000039158	false
1845	ENSMUSG00000039157	false
1846	ENSMUSG00000039145	false
1847	ENSMUSG00000039126	false
1848	ENSMUSG00000039115	false
1849	ENSMUSG00000039059	false
1850	ENSMUSG00000039050	false
1851	ENSMUSG00000038836	false
1852	ENSMUSG00000038644	false
1853	ENSMUSG00000038578	false
1854	ENSMUSG00000038497	false
1855	ENSMUSG00000038379	false
1856	ENSMUSG00000038354	false
1857	ENSMUSG00000038319	false
1858	ENSMUSG00000038241	false
1859	ENSMUSG00000038175	false
1860	ENSMUSG00000038068	false
1861	ENSMUSG00000038039	false
1862	ENSMUSG00000038005	false
1863	ENSMUSG00000037846	false
1864	ENSMUSG00000037820	false
1865	ENSMUSG00000037643	false
1866	ENSMUSG00000037628	false
1867	ENSMUSG00000037606	false
1868	ENSMUSG00000037579	false
1869	ENSMUSG00000037447	false
1870	ENSMUSG00000037428	false
1871	ENSMUSG00000037306	false
1872	ENSMUSG00000037235	false
1873	ENSMUSG00000037159	false
1874	ENSMUSG00000037005	false
1875	ENSMUSG00000036875	false
1876	ENSMUSG00000036863	false
1877	ENSMUSG00000036526	false
1878	ENSMUSG00000036368	false
1879	ENSMUSG00000036306	false
1880	ENSMUSG00000036256	false
1881	ENSMUSG00000036181	false
1882	ENSMUSG00000036022	false
1883	ENSMUSG00000035901	false
1884	ENSMUSG00000035847	false
1885	ENSMUSG00000035722	false
1886	ENSMUSG00000035486	false
1887	ENSMUSG00000035455	false
1888	ENSMUSG00000035273	false
1889	ENSMUSG00000034883	false
1890	ENSMUSG00000034858	false
1891	ENSMUSG00000034825	false
1892	ENSMUSG00000034758	false
1893	ENSMUSG00000034586	false
1894	ENSMUSG00000034317	false
1895	ENSMUSG00000034265	false
1896	ENSMUSG00000034226	false
1897	ENSMUSG00000034177	false
1898	ENSMUSG00000034164	false
1899	ENSMUSG00000034116	false
1900	ENSMUSG00000033952	false
1901	ENSMUSG00000033917	false
1902	ENSMUSG00000033906	false
1903	ENSMUSG00000033530	false
1904	ENSMUSG00000033287	false
1905	ENSMUSG00000033147	false
1906	ENSMUSG00000032965	false
1907	ENSMUSG00000032932	false
1908	ENSMUSG00000032902	false
1909	ENSMUSG00000032783	false
1910	ENSMUSG00000032776	false
1911	ENSMUSG00000032769	false
1912	ENSMUSG00000032656	false
1913	ENSMUSG00000032640	false
1914	ENSMUSG00000032555	false
1915	ENSMUSG00000032531	false
1916	ENSMUSG00000032373	false
1917	ENSMUSG00000032353	false
1918	ENSMUSG00000032350	false
1919	ENSMUSG00000032344	false
1920	ENSMUSG00000032322	false
1921	ENSMUSG00000032254	false
1922	ENSMUSG00000032226	false
1923	ENSMUSG00000032218	false
1924	ENSMUSG00000032202	false
1925	ENSMUSG00000031987	false
1926	ENSMUSG00000031903	false
1927	ENSMUSG00000031881	false
1928	ENSMUSG00000031668	false
1929	ENSMUSG00000031629	false
1930	ENSMUSG00000031617	false
1931	ENSMUSG00000031453	false
1932	ENSMUSG00000031367	false
1933	ENSMUSG00000031129	false
1934	ENSMUSG00000031004	false
1935	ENSMUSG00000030830	false
1936	ENSMUSG00000030671	false
1937	ENSMUSG00000030643	false
1938	ENSMUSG00000030528	false
1939	ENSMUSG00000030407	false
1940	ENSMUSG00000030346	false
1941	ENSMUSG00000030275	false
1942	ENSMUSG00000030199	false
1943	ENSMUSG00000030107	false
1944	ENSMUSG00000030029	false
1945	ENSMUSG00000029910	false
1946	ENSMUSG00000029875	false
1947	ENSMUSG00000029847	false
1948	ENSMUSG00000029828	false
1949	ENSMUSG00000029650	false
1950	ENSMUSG00000029630	false
1951	ENSMUSG00000029601	false
1952	ENSMUSG00000029516	false
1953	ENSMUSG00000029470	false
1954	ENSMUSG00000029414	false
1955	ENSMUSG00000029408	false
1956	ENSMUSG00000029343	false
1957	ENSMUSG00000029312	false
1958	ENSMUSG00000029185	false
1959	ENSMUSG00000029166	false
1960	ENSMUSG00000029163	false
1961	ENSMUSG00000028909	false
1962	ENSMUSG00000028874	false
1963	ENSMUSG00000028832	false
1964	ENSMUSG00000028718	false
1965	ENSMUSG00000028702	false
1966	ENSMUSG00000028699	false
1967	ENSMUSG00000028678	false
1968	ENSMUSG00000028641	false
1969	ENSMUSG00000028634	false
1970	ENSMUSG00000028633	false
1971	ENSMUSG00000028614	false
1972	ENSMUSG00000028602	false
1973	ENSMUSG00000028581	false
1974	ENSMUSG00000028560	false
1975	ENSMUSG00000028439	false
1976	ENSMUSG00000028341	false
1977	ENSMUSG00000028312	false
1978	ENSMUSG00000028282	false
1979	ENSMUSG00000028212	false
1980	ENSMUSG00000027994	false
1981	ENSMUSG00000027878	false
1982	ENSMUSG00000027834	false
1983	ENSMUSG00000027763	false
1984	ENSMUSG00000027752	false
1985	ENSMUSG00000027654	false
1986	ENSMUSG00000027611	false
1987	ENSMUSG00000027533	false
1988	ENSMUSG00000027514	false
1989	ENSMUSG00000027513	false
1990	ENSMUSG00000027469	false
1991	ENSMUSG00000027454	false
1992	ENSMUSG00000027326	false
1993	ENSMUSG00000027249	false
1994	ENSMUSG00000027242	false
1995	ENSMUSG00000027230	false
1996	ENSMUSG00000027075	false
1997	ENSMUSG00000027009	false
1998	ENSMUSG00000027006	false
1999	ENSMUSG00000026921	false
2000	ENSMUSG00000026879	false
2001	ENSMUSG00000026786	false
2002	ENSMUSG00000026785	false
2003	ENSMUSG00000026779	false
2004	ENSMUSG00000026728	false
2005	ENSMUSG00000026683	false
2006	ENSMUSG00000026605	false
2007	ENSMUSG00000026546	false
2008	ENSMUSG00000026509	false
2009	ENSMUSG00000026504	false
2010	ENSMUSG00000026429	false
2011	ENSMUSG00000026360	false
2012	ENSMUSG00000026281	false
2013	ENSMUSG00000026196	false
2014	ENSMUSG00000025912	false
2015	ENSMUSG00000025758	false
2016	ENSMUSG00000025584	false
2017	ENSMUSG00000025576	false
2018	ENSMUSG00000025352	false
2019	ENSMUSG00000025351	false
2020	ENSMUSG00000025154	false
2021	ENSMUSG00000025019	false
2022	ENSMUSG00000025001	false
2023	ENSMUSG00000024989	false
2024	ENSMUSG00000024978	false
2025	ENSMUSG00000024891	false
2026	ENSMUSG00000024858	false
2027	ENSMUSG00000024795	false
2028	ENSMUSG00000024777	false
2029	ENSMUSG00000024774	false
2030	ENSMUSG00000024644	false
2031	ENSMUSG00000024597	false
2032	ENSMUSG00000024575	false
2033	ENSMUSG00000024542	false
2034	ENSMUSG00000024525	false
2035	ENSMUSG00000024516	false
2036	ENSMUSG00000024301	false
2037	ENSMUSG00000024299	false
2038	ENSMUSG00000024232	false
2039	ENSMUSG00000024193	false
2040	ENSMUSG00000024063	false
2041	ENSMUSG00000023940	false
2042	ENSMUSG00000023272	false
2043	ENSMUSG00000023236	false
2044	ENSMUSG00000023224	false
2045	ENSMUSG00000023032	false
2046	ENSMUSG00000023017	false
2047	ENSMUSG00000023015	false
2048	ENSMUSG00000023009	false
2049	ENSMUSG00000023008	false
2050	ENSMUSG00000023004	false
2051	ENSMUSG00000022945	false
2052	ENSMUSG00000022912	false
2053	ENSMUSG00000022900	false
2054	ENSMUSG00000022864	false
2055	ENSMUSG00000022762	false
2056	ENSMUSG00000022748	false
2057	ENSMUSG00000022673	false
2058	ENSMUSG00000022619	false
2059	ENSMUSG00000022519	false
2060	ENSMUSG00000022436	false
2061	ENSMUSG00000022385	false
2062	ENSMUSG00000022360	false
2063	ENSMUSG00000022253	false
2064	ENSMUSG00000022177	false
2065	ENSMUSG00000022148	false
2066	ENSMUSG00000022136	false
2067	ENSMUSG00000022048	false
[truncated: 130 more rows]
