# Supplementary material for: Regulatory network analysis of Paneth cell and goblet cell enriched gut organoids using transcriptomics approaches
Source: Royal Society of Chemistry journal article supplement (doi:10.1039/c9mo00130a), 2019-12-10
Supplement: c9mo00130a2.cys [file c9mo00130a2.cys › CytoscapeSession-2019_09_26-21_57/tables/21371-1%3A+Cluster+3+%28Score%3A+5.923%29/LOCAL_ATTRS-org.cytoscape.model.CyEdge-1%3A+Cluster+3+%28Score%3A+5.923%29+default+edge.cytable]

CyCSV-Version	1
SUID	interaction	name	selected
java.lang.Long	java.lang.String	java.lang.String	java.lang.Boolean
1: Cluster 3 (Score: 5.923) default edge
15376	TF-TG	ENSMUSG00000026565 (TF-TG) ENSMUSG00000021281	false
11280	TF-TG	ENSMUSG00000026815 (TF-TG) ENSMUSG00000027544	false
11275	TF-TG	ENSMUSG00000026815 (TF-TG) ENSMUSG00000027654	false
15369	TF-TG	ENSMUSG00000026565 (TF-TG) ENSMUSG00000022136	false
15367	TF-TG	ENSMUSG00000026565 (TF-TG) ENSMUSG00000022177	false
11270	TF-TG	ENSMUSG00000026815 (TF-TG) ENSMUSG00000027878	false
11269	TF-TG	ENSMUSG00000026815 (TF-TG) ENSMUSG00000027890	false
15364	TF-TG	ENSMUSG00000026565 (TF-TG) ENSMUSG00000022360	false
15363	TF-TG	ENSMUSG00000026565 (TF-TG) ENSMUSG00000022385	false
15362	TF-TG	ENSMUSG00000026565 (TF-TG) ENSMUSG00000022436	false
11266	TF-TG	ENSMUSG00000026815 (TF-TG) ENSMUSG00000027994	false
15361	TF-TG	ENSMUSG00000026565 (TF-TG) ENSMUSG00000022519	false
15359	TF-TG	ENSMUSG00000026565 (TF-TG) ENSMUSG00000022748	false
11263	TF-TG	ENSMUSG00000026815 (TF-TG) ENSMUSG00000028076	false
15356	TF-TG	ENSMUSG00000026565 (TF-TG) ENSMUSG00000022900	false
15352	TF-TG	ENSMUSG00000026565 (TF-TG) ENSMUSG00000023004	false
15351	TF-TG	ENSMUSG00000026565 (TF-TG) ENSMUSG00000023008	false
11255	TF-TG	ENSMUSG00000026815 (TF-TG) ENSMUSG00000028341	false
15350	TF-TG	ENSMUSG00000026565 (TF-TG) ENSMUSG00000023009	false
15348	TF-TG	ENSMUSG00000026565 (TF-TG) ENSMUSG00000023032	false
15344	TF-TG	ENSMUSG00000026565 (TF-TG) ENSMUSG00000023940	false
11246	TF-TG	ENSMUSG00000026815 (TF-TG) ENSMUSG00000028560	false
15341	TF-TG	ENSMUSG00000026565 (TF-TG) ENSMUSG00000024063	false
11244	TF-TG	ENSMUSG00000026815 (TF-TG) ENSMUSG00000028614	false
11242	TF-TG	ENSMUSG00000026815 (TF-TG) ENSMUSG00000028633	false
15337	TF-TG	ENSMUSG00000026565 (TF-TG) ENSMUSG00000024301	false
15333	TF-TG	ENSMUSG00000026565 (TF-TG) ENSMUSG00000024525	false
11236	TF-TG	ENSMUSG00000026815 (TF-TG) ENSMUSG00000028718	false
15331	TF-TG	ENSMUSG00000026565 (TF-TG) ENSMUSG00000024542	false
15330	TF-TG	ENSMUSG00000026565 (TF-TG) ENSMUSG00000024575	false
15329	TF-TG	ENSMUSG00000026565 (TF-TG) ENSMUSG00000024644	false
11231	TF-TG	ENSMUSG00000026815 (TF-TG) ENSMUSG00000028832	false
11230	TF-TG	ENSMUSG00000026815 (TF-TG) ENSMUSG00000028874	false
11229	TF-TG	ENSMUSG00000026815 (TF-TG) ENSMUSG00000028884	false
15321	TF-TG	ENSMUSG00000026565 (TF-TG) ENSMUSG00000025154	false
11224	TF-TG	ENSMUSG00000026815 (TF-TG) ENSMUSG00000028972	false
15318	TF-TG	ENSMUSG00000026565 (TF-TG) ENSMUSG00000025584	false
15317	TF-TG	ENSMUSG00000026565 (TF-TG) ENSMUSG00000025758	false
11221	TF-TG	ENSMUSG00000026815 (TF-TG) ENSMUSG00000029096	false
15314	TF-TG	ENSMUSG00000026565 (TF-TG) ENSMUSG00000026102	false
15313	TF-TG	ENSMUSG00000026565 (TF-TG) ENSMUSG00000026255	false
11217	TF-TG	ENSMUSG00000026815 (TF-TG) ENSMUSG00000029163	false
11216	TF-TG	ENSMUSG00000026815 (TF-TG) ENSMUSG00000029166	false
11215	TF-TG	ENSMUSG00000026815 (TF-TG) ENSMUSG00000029177	false
15310	TF-TG	ENSMUSG00000026565 (TF-TG) ENSMUSG00000026360	false
11214	TF-TG	ENSMUSG00000026815 (TF-TG) ENSMUSG00000029185	false
15309	TF-TG	ENSMUSG00000026565 (TF-TG) ENSMUSG00000026429	false
15306	TF-TG	ENSMUSG00000026565 (TF-TG) ENSMUSG00000026605	false
11208	TF-TG	ENSMUSG00000026815 (TF-TG) ENSMUSG00000029436	false
11207	TF-TG	ENSMUSG00000026815 (TF-TG) ENSMUSG00000029470	false
15302	TF-TG	ENSMUSG00000026565 (TF-TG) ENSMUSG00000026785	false
11206	TF-TG	ENSMUSG00000026815 (TF-TG) ENSMUSG00000029516	false
15301	TF-TG	ENSMUSG00000026565 (TF-TG) ENSMUSG00000026864	false
15300	TF-TG	ENSMUSG00000026565 (TF-TG) ENSMUSG00000026879	false
15299	TF-TG	ENSMUSG00000026565 (TF-TG) ENSMUSG00000026921	false
11203	TF-TG	ENSMUSG00000026815 (TF-TG) ENSMUSG00000029650	false
15298	TF-TG	ENSMUSG00000026565 (TF-TG) ENSMUSG00000026930	false
15297	TF-TG	ENSMUSG00000026565 (TF-TG) ENSMUSG00000026955	false
11200	TF-TG	ENSMUSG00000026815 (TF-TG) ENSMUSG00000029847	false
15294	TF-TG	ENSMUSG00000026565 (TF-TG) ENSMUSG00000027326	false
15293	TF-TG	ENSMUSG00000026565 (TF-TG) ENSMUSG00000027454	false
15292	TF-TG	ENSMUSG00000026565 (TF-TG) ENSMUSG00000027456	false
11196	TF-TG	ENSMUSG00000026815 (TF-TG) ENSMUSG00000030029	false
15289	TF-TG	ENSMUSG00000026565 (TF-TG) ENSMUSG00000027514	false
11190	TF-TG	ENSMUSG00000026815 (TF-TG) ENSMUSG00000030263	false
15285	TF-TG	ENSMUSG00000026565 (TF-TG) ENSMUSG00000027878	false
11189	TF-TG	ENSMUSG00000026815 (TF-TG) ENSMUSG00000030275	false
15283	TF-TG	ENSMUSG00000026565 (TF-TG) ENSMUSG00000028341	false
11186	TF-TG	ENSMUSG00000026815 (TF-TG) ENSMUSG00000030340	false
15278	TF-TG	ENSMUSG00000026565 (TF-TG) ENSMUSG00000028560	false
11181	TF-TG	ENSMUSG00000026815 (TF-TG) ENSMUSG00000030483	false
11179	TF-TG	ENSMUSG00000026815 (TF-TG) ENSMUSG00000030543	false
15273	TF-TG	ENSMUSG00000026565 (TF-TG) ENSMUSG00000028718	false
15271	TF-TG	ENSMUSG00000026565 (TF-TG) ENSMUSG00000028832	false
11174	TF-TG	ENSMUSG00000026815 (TF-TG) ENSMUSG00000030935	false
15269	TF-TG	ENSMUSG00000026565 (TF-TG) ENSMUSG00000028874	false
15268	TF-TG	ENSMUSG00000026565 (TF-TG) ENSMUSG00000028884	false
15264	TF-TG	ENSMUSG00000026565 (TF-TG) ENSMUSG00000029185	false
11168	TF-TG	ENSMUSG00000026815 (TF-TG) ENSMUSG00000031367	false
11164	TF-TG	ENSMUSG00000026815 (TF-TG) ENSMUSG00000031453	false
15259	TF-TG	ENSMUSG00000026565 (TF-TG) ENSMUSG00000029470	false
15258	TF-TG	ENSMUSG00000026565 (TF-TG) ENSMUSG00000029516	false
11162	TF-TG	ENSMUSG00000026815 (TF-TG) ENSMUSG00000031586	false
15254	TF-TG	ENSMUSG00000026565 (TF-TG) ENSMUSG00000029650	false
15252	TF-TG	ENSMUSG00000026565 (TF-TG) ENSMUSG00000029847	false
15250	TF-TG	ENSMUSG00000026565 (TF-TG) ENSMUSG00000030029	false
11153	TF-TG	ENSMUSG00000026815 (TF-TG) ENSMUSG00000031849	false
15248	TF-TG	ENSMUSG00000026565 (TF-TG) ENSMUSG00000030263	false
15247	TF-TG	ENSMUSG00000026565 (TF-TG) ENSMUSG00000030275	false
11151	TF-TG	ENSMUSG00000026815 (TF-TG) ENSMUSG00000031903	false
15240	TF-TG	ENSMUSG00000026565 (TF-TG) ENSMUSG00000031367	false
15239	TF-TG	ENSMUSG00000026565 (TF-TG) ENSMUSG00000031453	false
15237	TF-TG	ENSMUSG00000026565 (TF-TG) ENSMUSG00000031586	false
11139	TF-TG	ENSMUSG00000026815 (TF-TG) ENSMUSG00000032120	false
15233	TF-TG	ENSMUSG00000026565 (TF-TG) ENSMUSG00000031903	false
15232	TF-TG	ENSMUSG00000026565 (TF-TG) ENSMUSG00000032120	false
15230	TF-TG	ENSMUSG00000026565 (TF-TG) ENSMUSG00000032254	false
11134	TF-TG	ENSMUSG00000026815 (TF-TG) ENSMUSG00000032254	false
11133	TF-TG	ENSMUSG00000026815 (TF-TG) ENSMUSG00000032278	false
15226	TF-TG	ENSMUSG00000026565 (TF-TG) ENSMUSG00000032640	false
15225	TF-TG	ENSMUSG00000026565 (TF-TG) ENSMUSG00000032656	false
11129	TF-TG	ENSMUSG00000026815 (TF-TG) ENSMUSG00000032338	false
11127	TF-TG	ENSMUSG00000026815 (TF-TG) ENSMUSG00000032356	false
15222	TF-TG	ENSMUSG00000026565 (TF-TG) ENSMUSG00000032783	false
11126	TF-TG	ENSMUSG00000026815 (TF-TG) ENSMUSG00000032373	false
11125	TF-TG	ENSMUSG00000026815 (TF-TG) ENSMUSG00000032380	false
15220	TF-TG	ENSMUSG00000026565 (TF-TG) ENSMUSG00000032965	false
15218	TF-TG	ENSMUSG00000026565 (TF-TG) ENSMUSG00000033222	false
15216	TF-TG	ENSMUSG00000026565 (TF-TG) ENSMUSG00000033530	false
15214	TF-TG	ENSMUSG00000026565 (TF-TG) ENSMUSG00000034116	false
11118	TF-TG	ENSMUSG00000026815 (TF-TG) ENSMUSG00000032549	false
11117	TF-TG	ENSMUSG00000026815 (TF-TG) ENSMUSG00000032640	false
11116	TF-TG	ENSMUSG00000026815 (TF-TG) ENSMUSG00000032656	false
15210	TF-TG	ENSMUSG00000026565 (TF-TG) ENSMUSG00000034317	false
15208	TF-TG	ENSMUSG00000026565 (TF-TG) ENSMUSG00000034773	false
11112	TF-TG	ENSMUSG00000026815 (TF-TG) ENSMUSG00000032783	false
15206	TF-TG	ENSMUSG00000026565 (TF-TG) ENSMUSG00000034883	false
15205	TF-TG	ENSMUSG00000026565 (TF-TG) ENSMUSG00000035158	false
11108	TF-TG	ENSMUSG00000026815 (TF-TG) ENSMUSG00000032965	false
15201	TF-TG	ENSMUSG00000026565 (TF-TG) ENSMUSG00000035561	false
13153	TF-TG	ENSMUSG00000027878 (TF-TG) ENSMUSG00000022528	false
13152	TF-TG	ENSMUSG00000027878 (TF-TG) ENSMUSG00000038146	false
11102	TF-TG	ENSMUSG00000026815 (TF-TG) ENSMUSG00000033222	false
11101	TF-TG	ENSMUSG00000026815 (TF-TG) ENSMUSG00000033287	false
15195	TF-TG	ENSMUSG00000026565 (TF-TG) ENSMUSG00000036526	false
11099	TF-TG	ENSMUSG00000026815 (TF-TG) ENSMUSG00000033530	false
15194	TF-TG	ENSMUSG00000026565 (TF-TG) ENSMUSG00000036995	false
15192	TF-TG	ENSMUSG00000026565 (TF-TG) ENSMUSG00000037235	false
11096	TF-TG	ENSMUSG00000026815 (TF-TG) ENSMUSG00000033684	false
15191	TF-TG	ENSMUSG00000026565 (TF-TG) ENSMUSG00000037306	false
15190	TF-TG	ENSMUSG00000026565 (TF-TG) ENSMUSG00000037447	false
11093	TF-TG	ENSMUSG00000026815 (TF-TG) ENSMUSG00000033871	false
15188	TF-TG	ENSMUSG00000026565 (TF-TG) ENSMUSG00000037583	false
15186	TF-TG	ENSMUSG00000026565 (TF-TG) ENSMUSG00000037628	false
11090	TF-TG	ENSMUSG00000026815 (TF-TG) ENSMUSG00000034112	false
11089	TF-TG	ENSMUSG00000026815 (TF-TG) ENSMUSG00000034116	false
15184	TF-TG	ENSMUSG00000026565 (TF-TG) ENSMUSG00000037664	false
15180	TF-TG	ENSMUSG00000026565 (TF-TG) ENSMUSG00000038039	false
15179	TF-TG	ENSMUSG00000026565 (TF-TG) ENSMUSG00000038146	false
15178	TF-TG	ENSMUSG00000026565 (TF-TG) ENSMUSG00000038175	false
11082	TF-TG	ENSMUSG00000026815 (TF-TG) ENSMUSG00000034317	false
11081	TF-TG	ENSMUSG00000026815 (TF-TG) ENSMUSG00000034353	false
11080	TF-TG	ENSMUSG00000026815 (TF-TG) ENSMUSG00000034472	false
15175	TF-TG	ENSMUSG00000026565 (TF-TG) ENSMUSG00000038451	false
11078	TF-TG	ENSMUSG00000026815 (TF-TG) ENSMUSG00000034586	false
15169	TF-TG	ENSMUSG00000026565 (TF-TG) ENSMUSG00000039050	false
11073	TF-TG	ENSMUSG00000026815 (TF-TG) ENSMUSG00000034773	false
15168	TF-TG	ENSMUSG00000026565 (TF-TG) ENSMUSG00000039157	false
15167	TF-TG	ENSMUSG00000026565 (TF-TG) ENSMUSG00000039158	false
11070	TF-TG	ENSMUSG00000026815 (TF-TG) ENSMUSG00000034883	false
15165	TF-TG	ENSMUSG00000026565 (TF-TG) ENSMUSG00000039270	false
15163	TF-TG	ENSMUSG00000026565 (TF-TG) ENSMUSG00000039621	false
15162	TF-TG	ENSMUSG00000026565 (TF-TG) ENSMUSG00000039814	false
15161	TF-TG	ENSMUSG00000026565 (TF-TG) ENSMUSG00000039943	false
15160	TF-TG	ENSMUSG00000026565 (TF-TG) ENSMUSG00000039982	false
9014	TF-TG	ENSMUSG00000038146 (TF-TG) ENSMUSG00000022528	false
11062	TF-TG	ENSMUSG00000026815 (TF-TG) ENSMUSG00000035486	false
9012	TF-TG	ENSMUSG00000038146 (TF-TG) ENSMUSG00000078202	false
11060	TF-TG	ENSMUSG00000026815 (TF-TG) ENSMUSG00000035561	false
15151	TF-TG	ENSMUSG00000026565 (TF-TG) ENSMUSG00000040710	false
11055	TF-TG	ENSMUSG00000026815 (TF-TG) ENSMUSG00000035901	false
15149	TF-TG	ENSMUSG00000026565 (TF-TG) ENSMUSG00000040860	false
15148	TF-TG	ENSMUSG00000026565 (TF-TG) ENSMUSG00000040918	false
15147	TF-TG	ENSMUSG00000026565 (TF-TG) ENSMUSG00000041064	false
11048	TF-TG	ENSMUSG00000026815 (TF-TG) ENSMUSG00000036526	false
15143	TF-TG	ENSMUSG00000026565 (TF-TG) ENSMUSG00000041431	false
15141	TF-TG	ENSMUSG00000026565 (TF-TG) ENSMUSG00000041498	false
11039	TF-TG	ENSMUSG00000026815 (TF-TG) ENSMUSG00000036913	false
15132	TF-TG	ENSMUSG00000026565 (TF-TG) ENSMUSG00000043004	false
11036	TF-TG	ENSMUSG00000026815 (TF-TG) ENSMUSG00000036995	false
15129	TF-TG	ENSMUSG00000026565 (TF-TG) ENSMUSG00000043953	false
11031	TF-TG	ENSMUSG00000026815 (TF-TG) ENSMUSG00000037235	false
11029	TF-TG	ENSMUSG00000026815 (TF-TG) ENSMUSG00000037306	false
11027	TF-TG	ENSMUSG00000026815 (TF-TG) ENSMUSG00000037447	false
11025	TF-TG	ENSMUSG00000026815 (TF-TG) ENSMUSG00000037579	false
11023	TF-TG	ENSMUSG00000026815 (TF-TG) ENSMUSG00000037583	false
15117	TF-TG	ENSMUSG00000026565 (TF-TG) ENSMUSG00000045817	false
11021	TF-TG	ENSMUSG00000026815 (TF-TG) ENSMUSG00000037621	false
15116	TF-TG	ENSMUSG00000026565 (TF-TG) ENSMUSG00000045932	false
11019	TF-TG	ENSMUSG00000026815 (TF-TG) ENSMUSG00000037628	false
11017	TF-TG	ENSMUSG00000026815 (TF-TG) ENSMUSG00000037664	false
15111	TF-TG	ENSMUSG00000026565 (TF-TG) ENSMUSG00000046711	false
15109	TF-TG	ENSMUSG00000026565 (TF-TG) ENSMUSG00000047003	false
15108	TF-TG	ENSMUSG00000026565 (TF-TG) ENSMUSG00000047044	false
11010	TF-TG	ENSMUSG00000026815 (TF-TG) ENSMUSG00000038039	false
15104	TF-TG	ENSMUSG00000026565 (TF-TG) ENSMUSG00000047534	false
11008	TF-TG	ENSMUSG00000026815 (TF-TG) ENSMUSG00000038146	false
11007	TF-TG	ENSMUSG00000026815 (TF-TG) ENSMUSG00000038175	false
15101	TF-TG	ENSMUSG00000026565 (TF-TG) ENSMUSG00000048058	false
15100	TF-TG	ENSMUSG00000026565 (TF-TG) ENSMUSG00000048148	false
15098	TF-TG	ENSMUSG00000026565 (TF-TG) ENSMUSG00000048965	false
10999	TF-TG	ENSMUSG00000026815 (TF-TG) ENSMUSG00000038451	false
15094	TF-TG	ENSMUSG00000026565 (TF-TG) ENSMUSG00000049907	false
10992	TF-TG	ENSMUSG00000026815 (TF-TG) ENSMUSG00000038745	false
10990	TF-TG	ENSMUSG00000026815 (TF-TG) ENSMUSG00000039050	false
15085	TF-TG	ENSMUSG00000026565 (TF-TG) ENSMUSG00000051498	false
15082	TF-TG	ENSMUSG00000026565 (TF-TG) ENSMUSG00000052087	false
10986	TF-TG	ENSMUSG00000026815 (TF-TG) ENSMUSG00000039126	false
15081	TF-TG	ENSMUSG00000026565 (TF-TG) ENSMUSG00000052135	false
15080	TF-TG	ENSMUSG00000026565 (TF-TG) ENSMUSG00000052331	false
10984	TF-TG	ENSMUSG00000026815 (TF-TG) ENSMUSG00000039157	false
10983	TF-TG	ENSMUSG00000026815 (TF-TG) ENSMUSG00000039158	false
15076	TF-TG	ENSMUSG00000026565 (TF-TG) ENSMUSG00000054200	false
15075	TF-TG	ENSMUSG00000026565 (TF-TG) ENSMUSG00000054321	false
10979	TF-TG	ENSMUSG00000026815 (TF-TG) ENSMUSG00000039270	false
15074	TF-TG	ENSMUSG00000026565 (TF-TG) ENSMUSG00000054342	false
15073	TF-TG	ENSMUSG00000026565 (TF-TG) ENSMUSG00000054612	false
15072	TF-TG	ENSMUSG00000026565 (TF-TG) ENSMUSG00000054717	false
15069	TF-TG	ENSMUSG00000026565 (TF-TG) ENSMUSG00000054920	false
10972	TF-TG	ENSMUSG00000026815 (TF-TG) ENSMUSG00000039621	false
10970	TF-TG	ENSMUSG00000026815 (TF-TG) ENSMUSG00000039676	false
10969	TF-TG	ENSMUSG00000026815 (TF-TG) ENSMUSG00000039683	false
10967	TF-TG	ENSMUSG00000026815 (TF-TG) ENSMUSG00000039814	false
10966	TF-TG	ENSMUSG00000026815 (TF-TG) ENSMUSG00000039943	false
10965	TF-TG	ENSMUSG00000026815 (TF-TG) ENSMUSG00000039982	false
15057	TF-TG	ENSMUSG00000026565 (TF-TG) ENSMUSG00000057406	false
15055	TF-TG	ENSMUSG00000026565 (TF-TG) ENSMUSG00000058145	false
15054	TF-TG	ENSMUSG00000026565 (TF-TG) ENSMUSG00000058216	false
15052	TF-TG	ENSMUSG00000026565 (TF-TG) ENSMUSG00000058799	false
15051	TF-TG	ENSMUSG00000026565 (TF-TG) ENSMUSG00000059013	false
15048	TF-TG	ENSMUSG00000026565 (TF-TG) ENSMUSG00000060063	false
15047	TF-TG	ENSMUSG00000026565 (TF-TG) ENSMUSG00000060519	false
10949	TF-TG	ENSMUSG00000026815 (TF-TG) ENSMUSG00000040710	false
15044	TF-TG	ENSMUSG00000026565 (TF-TG) ENSMUSG00000061718	false
15042	TF-TG	ENSMUSG00000026565 (TF-TG) ENSMUSG00000062078	false
10946	TF-TG	ENSMUSG00000026815 (TF-TG) ENSMUSG00000040723	false
10945	TF-TG	ENSMUSG00000026815 (TF-TG) ENSMUSG00000040860	false
10944	TF-TG	ENSMUSG00000026815 (TF-TG) ENSMUSG00000040918	false
15039	TF-TG	ENSMUSG00000026565 (TF-TG) ENSMUSG00000062859	false
10942	TF-TG	ENSMUSG00000026815 (TF-TG) ENSMUSG00000041064	false
15037	TF-TG	ENSMUSG00000026565 (TF-TG) ENSMUSG00000064215	false
15030	TF-TG	ENSMUSG00000026565 (TF-TG) ENSMUSG00000070407	false
15028	TF-TG	ENSMUSG00000026565 (TF-TG) ENSMUSG00000071547	false
10932	TF-TG	ENSMUSG00000026815 (TF-TG) ENSMUSG00000041431	false
10931	TF-TG	ENSMUSG00000026815 (TF-TG) ENSMUSG00000041498	false
15026	TF-TG	ENSMUSG00000026565 (TF-TG) ENSMUSG00000072620	false
15024	TF-TG	ENSMUSG00000026565 (TF-TG) ENSMUSG00000074476	false
15020	TF-TG	ENSMUSG00000026565 (TF-TG) ENSMUSG00000075502	false
10921	TF-TG	ENSMUSG00000026815 (TF-TG) ENSMUSG00000042109	false
15016	TF-TG	ENSMUSG00000026565 (TF-TG) ENSMUSG00000078984	false
10920	TF-TG	ENSMUSG00000026815 (TF-TG) ENSMUSG00000042115	false
15015	TF-TG	ENSMUSG00000026565 (TF-TG) ENSMUSG00000079037	false
15013	TF-TG	ENSMUSG00000026565 (TF-TG) ENSMUSG00000079442	false
15011	TF-TG	ENSMUSG00000026565 (TF-TG) ENSMUSG00000079654	false
10915	TF-TG	ENSMUSG00000026815 (TF-TG) ENSMUSG00000042429	false
12962	TF-TG	ENSMUSG00000027544 (TF-TG) ENSMUSG00000006784	false
10911	TF-TG	ENSMUSG00000026815 (TF-TG) ENSMUSG00000042532	false
15003	TF-lincRNA	ENSMUSG00000026565 (TF-lincRNA) ENSMUSG00000084797	false
12955	TF-TG	ENSMUSG00000027544 (TF-TG) ENSMUSG00000020741	false
12953	TF-TG	ENSMUSG00000027544 (TF-TG) ENSMUSG00000020894	false
12951	TF-TG	ENSMUSG00000027544 (TF-TG) ENSMUSG00000021281	false
12949	TF-TG	ENSMUSG00000027544 (TF-TG) ENSMUSG00000021725	false
10901	TF-TG	ENSMUSG00000026815 (TF-TG) ENSMUSG00000043004	false
14995	TF-TG	ENSMUSG00000026923 (TF-TG) ENSMUSG00000078202	false
12946	TF-TG	ENSMUSG00000027544 (TF-TG) ENSMUSG00000022900	false
12945	TF-TG	ENSMUSG00000027544 (TF-TG) ENSMUSG00000024063	false
10896	TF-TG	ENSMUSG00000026815 (TF-TG) ENSMUSG00000043391	false
12943	TF-TG	ENSMUSG00000027544 (TF-TG) ENSMUSG00000024552	false
10895	TF-TG	ENSMUSG00000026815 (TF-TG) ENSMUSG00000043419	false
12942	TF-TG	ENSMUSG00000027544 (TF-TG) ENSMUSG00000024621	false
10893	TF-TG	ENSMUSG00000026815 (TF-TG) ENSMUSG00000043639	false
12940	TF-TG	ENSMUSG00000027544 (TF-TG) ENSMUSG00000025059	false
10891	TF-TG	ENSMUSG00000026815 (TF-TG) ENSMUSG00000043953	false
14985	TF-TG	ENSMUSG00000022528 (TF-TG) ENSMUSG00000005370	false
14984	TF-TG	ENSMUSG00000022528 (TF-TG) ENSMUSG00000005533	false
12936	TF-TG	ENSMUSG00000027544 (TF-TG) ENSMUSG00000026360	false
14983	TF-TG	ENSMUSG00000022528 (TF-TG) ENSMUSG00000006784	false
12935	TF-TG	ENSMUSG00000027544 (TF-TG) ENSMUSG00000026429	false
12934	TF-TG	ENSMUSG00000027544 (TF-TG) ENSMUSG00000026480	false
12933	TF-TG	ENSMUSG00000027544 (TF-TG) ENSMUSG00000026921	false
14980	TF-TG	ENSMUSG00000022528 (TF-TG) ENSMUSG00000015745	false
12932	TF-TG	ENSMUSG00000027544 (TF-TG) ENSMUSG00000027009	false
12931	TF-TG	ENSMUSG00000027544 (TF-TG) ENSMUSG00000027456	false
14978	TF-TG	ENSMUSG00000022528 (TF-TG) ENSMUSG00000019982	false
14977	TF-TG	ENSMUSG00000022528 (TF-TG) ENSMUSG00000020185	false
10881	TF-TG	ENSMUSG00000026815 (TF-TG) ENSMUSG00000044456	false
14976	TF-TG	ENSMUSG00000022528 (TF-TG) ENSMUSG00000020230	false
12927	TF-TG	ENSMUSG00000027544 (TF-TG) ENSMUSG00000028614	false
14974	TF-TG	ENSMUSG00000022528 (TF-TG) ENSMUSG00000020894	false
12926	TF-TG	ENSMUSG00000027544 (TF-TG) ENSMUSG00000029096	false
14973	TF-TG	ENSMUSG00000022528 (TF-TG) ENSMUSG00000020897	false
14970	TF-TG	ENSMUSG00000022528 (TF-TG) ENSMUSG00000021725	false
12920	TF-TG	ENSMUSG00000027544 (TF-TG) ENSMUSG00000032356	false
14967	TF-TG	ENSMUSG00000022528 (TF-TG) ENSMUSG00000022018	false
14966	TF-TG	ENSMUSG00000022528 (TF-TG) ENSMUSG00000022136	false
12918	TF-TG	ENSMUSG00000027544 (TF-TG) ENSMUSG00000032549	false
12917	TF-TG	ENSMUSG00000027544 (TF-TG) ENSMUSG00000032656	false
14963	TF-TG	ENSMUSG00000022528 (TF-TG) ENSMUSG00000022360	false
12915	TF-TG	ENSMUSG00000027544 (TF-TG) ENSMUSG00000033530	false
12914	TF-TG	ENSMUSG00000027544 (TF-TG) ENSMUSG00000034858	false
10866	TF-TG	ENSMUSG00000026815 (TF-TG) ENSMUSG00000045817	false
12913	TF-TG	ENSMUSG00000027544 (TF-TG) ENSMUSG00000034883	false
14960	TF-TG	ENSMUSG00000022528 (TF-TG) ENSMUSG00000023009	false
10864	TF-TG	ENSMUSG00000026815 (TF-TG) ENSMUSG00000045932	false
12911	TF-TG	ENSMUSG00000027544 (TF-TG) ENSMUSG00000036526	false
12910	TF-TG	ENSMUSG00000027544 (TF-TG) ENSMUSG00000037447	false
10862	TF-TG	ENSMUSG00000026815 (TF-TG) ENSMUSG00000046070	false
14957	TF-TG	ENSMUSG00000022528 (TF-TG) ENSMUSG00000024597	false
14956	TF-TG	ENSMUSG00000022528 (TF-TG) ENSMUSG00000024743	false
12908	TF-TG	ENSMUSG00000027544 (TF-TG) ENSMUSG00000038175	false
14955	TF-TG	ENSMUSG00000022528 (TF-TG) ENSMUSG00000025584	false
12907	TF-TG	ENSMUSG00000027544 (TF-TG) ENSMUSG00000038451	false
12904	TF-TG	ENSMUSG00000027544 (TF-TG) ENSMUSG00000039158	false
14951	TF-TG	ENSMUSG00000022528 (TF-TG) ENSMUSG00000026102	false
14949	TF-TG	ENSMUSG00000022528 (TF-TG) ENSMUSG00000026321	false
14948	TF-TG	ENSMUSG00000022528 (TF-TG) ENSMUSG00000026565	false
14946	TF-TG	ENSMUSG00000022528 (TF-TG) ENSMUSG00000026785	false
10849	TF-TG	ENSMUSG00000026815 (TF-TG) ENSMUSG00000046711	false
14944	TF-TG	ENSMUSG00000022528 (TF-TG) ENSMUSG00000026879	false
12896	TF-TG	ENSMUSG00000027544 (TF-TG) ENSMUSG00000043419	false
14943	TF-TG	ENSMUSG00000022528 (TF-TG) ENSMUSG00000027381	false
12895	TF-TG	ENSMUSG00000027544 (TF-TG) ENSMUSG00000043953	false
12894	TF-TG	ENSMUSG00000027544 (TF-TG) ENSMUSG00000044456	false
10846	TF-TG	ENSMUSG00000026815 (TF-TG) ENSMUSG00000047003	false
10845	TF-TG	ENSMUSG00000026815 (TF-TG) ENSMUSG00000047044	false
14939	TF-TG	ENSMUSG00000022528 (TF-TG) ENSMUSG00000028341	false
10843	TF-TG	ENSMUSG00000026815 (TF-TG) ENSMUSG00000047139	false
14938	TF-TG	ENSMUSG00000022528 (TF-TG) ENSMUSG00000028560	false
14937	TF-TG	ENSMUSG00000022528 (TF-TG) ENSMUSG00000028633	false
12889	TF-TG	ENSMUSG00000027544 (TF-TG) ENSMUSG00000049807	false
12887	TF-TG	ENSMUSG00000027544 (TF-TG) ENSMUSG00000050395	false
14933	TF-TG	ENSMUSG00000022528 (TF-TG) ENSMUSG00000031367	false
10836	TF-TG	ENSMUSG00000026815 (TF-TG) ENSMUSG00000047534	false
14931	TF-TG	ENSMUSG00000022528 (TF-TG) ENSMUSG00000032278	false
14930	TF-TG	ENSMUSG00000022528 (TF-TG) ENSMUSG00000032338	false
12882	TF-TG	ENSMUSG00000027544 (TF-TG) ENSMUSG00000053581	false
12881	TF-TG	ENSMUSG00000027544 (TF-TG) ENSMUSG00000054342	false
12880	TF-TG	ENSMUSG00000027544 (TF-TG) ENSMUSG00000054920	false
14927	TF-TG	ENSMUSG00000022528 (TF-TG) ENSMUSG00000033222	false
12878	TF-TG	ENSMUSG00000027544 (TF-TG) ENSMUSG00000055629	false
10830	TF-TG	ENSMUSG00000026815 (TF-TG) ENSMUSG00000047986	false
14925	TF-TG	ENSMUSG00000022528 (TF-TG) ENSMUSG00000033871	false
12877	TF-TG	ENSMUSG00000027544 (TF-TG) ENSMUSG00000058624	false
14924	TF-TG	ENSMUSG00000022528 (TF-TG) ENSMUSG00000034317	false
10828	TF-TG	ENSMUSG00000026815 (TF-TG) ENSMUSG00000048058	false
14923	TF-TG	ENSMUSG00000022528 (TF-TG) ENSMUSG00000034472	false
14922	TF-TG	ENSMUSG00000022528 (TF-TG) ENSMUSG00000034773	false
12874	TF-TG	ENSMUSG00000027544 (TF-TG) ENSMUSG00000062078	false
10826	TF-TG	ENSMUSG00000026815 (TF-TG) ENSMUSG00000048148	false
14920	TF-TG	ENSMUSG00000022528 (TF-TG) ENSMUSG00000035901	false
14919	TF-TG	ENSMUSG00000022528 (TF-TG) ENSMUSG00000036913	false
12871	TF-TG	ENSMUSG00000027544 (TF-TG) ENSMUSG00000069515	false
14918	TF-TG	ENSMUSG00000022528 (TF-TG) ENSMUSG00000037235	false
12870	TF-TG	ENSMUSG00000027544 (TF-TG) ENSMUSG00000070407	false
14917	TF-TG	ENSMUSG00000022528 (TF-TG) ENSMUSG00000037447	false
14916	TF-TG	ENSMUSG00000022528 (TF-TG) ENSMUSG00000037579	false
12868	TF-TG	ENSMUSG00000027544 (TF-TG) ENSMUSG00000072620	false
14915	TF-TG	ENSMUSG00000022528 (TF-TG) ENSMUSG00000037664	false
14913	TF-TG	ENSMUSG00000022528 (TF-TG) ENSMUSG00000039126	false
12865	TF-lincRNA	ENSMUSG00000027544 (TF-lincRNA) ENSMUSG00000084797	false
10817	TF-TG	ENSMUSG00000026815 (TF-TG) ENSMUSG00000048965	false
14911	TF-TG	ENSMUSG00000022528 (TF-TG) ENSMUSG00000039683	false
14909	TF-TG	ENSMUSG00000022528 (TF-TG) ENSMUSG00000040710	false
14904	TF-TG	ENSMUSG00000022528 (TF-TG) ENSMUSG00000043004	false
10808	TF-TG	ENSMUSG00000026815 (TF-TG) ENSMUSG00000049723	false
14903	TF-TG	ENSMUSG00000022528 (TF-TG) ENSMUSG00000043391	false
10807	TF-TG	ENSMUSG00000026815 (TF-TG) ENSMUSG00000049807	false
14901	TF-TG	ENSMUSG00000022528 (TF-TG) ENSMUSG00000043639	false
10803	TF-TG	ENSMUSG00000026815 (TF-TG) ENSMUSG00000049907	false
14898	TF-TG	ENSMUSG00000022528 (TF-TG) ENSMUSG00000045817	false
14897	TF-TG	ENSMUSG00000022528 (TF-TG) ENSMUSG00000046711	false
14896	TF-TG	ENSMUSG00000022528 (TF-TG) ENSMUSG00000047003	false
14895	TF-TG	ENSMUSG00000022528 (TF-TG) ENSMUSG00000047044	false
10798	TF-TG	ENSMUSG00000026815 (TF-TG) ENSMUSG00000050395	false
14891	TF-TG	ENSMUSG00000022528 (TF-TG) ENSMUSG00000052135	false
14890	TF-TG	ENSMUSG00000022528 (TF-TG) ENSMUSG00000054321	false
14889	TF-TG	ENSMUSG00000022528 (TF-TG) ENSMUSG00000054342	false
14884	TF-TG	ENSMUSG00000022528 (TF-TG) ENSMUSG00000057406	false
14883	TF-TG	ENSMUSG00000022528 (TF-TG) ENSMUSG00000059013	false
14882	TF-TG	ENSMUSG00000022528 (TF-TG) ENSMUSG00000060548	false
14881	TF-TG	ENSMUSG00000022528 (TF-TG) ENSMUSG00000061718	false
14880	TF-TG	ENSMUSG00000022528 (TF-TG) ENSMUSG00000062078	false
14878	TF-TG	ENSMUSG00000022528 (TF-TG) ENSMUSG00000062859	false
10782	TF-TG	ENSMUSG00000026815 (TF-TG) ENSMUSG00000051498	false
14874	TF-TG	ENSMUSG00000022528 (TF-TG) ENSMUSG00000071547	false
10777	TF-TG	ENSMUSG00000026815 (TF-TG) ENSMUSG00000052087	false
14871	TF-TG	ENSMUSG00000022528 (TF-TG) ENSMUSG00000074715	false
10775	TF-TG	ENSMUSG00000026815 (TF-TG) ENSMUSG00000052135	false
14870	TF-TG	ENSMUSG00000022528 (TF-TG) ENSMUSG00000079654	false
10773	TF-TG	ENSMUSG00000026815 (TF-TG) ENSMUSG00000052331	false
14862	TF-TG	ENSMUSG00000035158 (TF-TG) ENSMUSG00000002489	false
14860	TF-TG	ENSMUSG00000035158 (TF-TG) ENSMUSG00000002885	false
14859	TF-TG	ENSMUSG00000035158 (TF-TG) ENSMUSG00000002997	false
10763	TF-TG	ENSMUSG00000026815 (TF-TG) ENSMUSG00000053334	false
14856	TF-TG	ENSMUSG00000035158 (TF-TG) ENSMUSG00000005370	false
10760	TF-TG	ENSMUSG00000026815 (TF-TG) ENSMUSG00000053581	false
14853	TF-TG	ENSMUSG00000035158 (TF-TG) ENSMUSG00000006784	false
10756	TF-TG	ENSMUSG00000026815 (TF-TG) ENSMUSG00000054200	false
14851	TF-TG	ENSMUSG00000035158 (TF-TG) ENSMUSG00000017466	false
10755	TF-TG	ENSMUSG00000026815 (TF-TG) ENSMUSG00000054321	false
10754	TF-TG	ENSMUSG00000026815 (TF-TG) ENSMUSG00000054342	false
14849	TF-TG	ENSMUSG00000035158 (TF-TG) ENSMUSG00000017652	false
14847	TF-TG	ENSMUSG00000035158 (TF-TG) ENSMUSG00000019302	false
10751	TF-TG	ENSMUSG00000026815 (TF-TG) ENSMUSG00000054612	false
14846	TF-TG	ENSMUSG00000035158 (TF-TG) ENSMUSG00000019773	false
10749	TF-TG	ENSMUSG00000026815 (TF-TG) ENSMUSG00000054717	false
14841	TF-TG	ENSMUSG00000035158 (TF-TG) ENSMUSG00000020712	false
10745	TF-TG	ENSMUSG00000026815 (TF-TG) ENSMUSG00000054920	false
10742	TF-TG	ENSMUSG00000026815 (TF-TG) ENSMUSG00000055612	false
10741	TF-TG	ENSMUSG00000026815 (TF-TG) ENSMUSG00000055629	false
14835	TF-TG	ENSMUSG00000035158 (TF-TG) ENSMUSG00000022136	false
14834	TF-TG	ENSMUSG00000035158 (TF-TG) ENSMUSG00000022385	false
14833	TF-TG	ENSMUSG00000035158 (TF-TG) ENSMUSG00000022528	false
14832	TF-TG	ENSMUSG00000035158 (TF-TG) ENSMUSG00000022864	false
14828	TF-TG	ENSMUSG00000035158 (TF-TG) ENSMUSG00000024301	false
14827	TF-TG	ENSMUSG00000035158 (TF-TG) ENSMUSG00000024590	false
14826	TF-TG	ENSMUSG00000035158 (TF-TG) ENSMUSG00000024597	false
14824	TF-TG	ENSMUSG00000035158 (TF-TG) ENSMUSG00000024897	false
14822	TF-TG	ENSMUSG00000035158 (TF-TG) ENSMUSG00000025584	false
10725	TF-TG	ENSMUSG00000026815 (TF-TG) ENSMUSG00000057092	false
14819	TF-TG	ENSMUSG00000035158 (TF-TG) ENSMUSG00000026281	false
14817	TF-TG	ENSMUSG00000035158 (TF-TG) ENSMUSG00000026429	false
10721	TF-TG	ENSMUSG00000026815 (TF-TG) ENSMUSG00000057406	false
14816	TF-TG	ENSMUSG00000035158 (TF-TG) ENSMUSG00000026480	false
14813	TF-TG	ENSMUSG00000035158 (TF-TG) ENSMUSG00000026864	false
14812	TF-TG	ENSMUSG00000035158 (TF-TG) ENSMUSG00000026879	false
14811	TF-TG	ENSMUSG00000035158 (TF-TG) ENSMUSG00000026921	false
10715	TF-TG	ENSMUSG00000026815 (TF-TG) ENSMUSG00000058145	false
14810	TF-TG	ENSMUSG00000035158 (TF-TG) ENSMUSG00000027009	false
10714	TF-TG	ENSMUSG00000026815 (TF-TG) ENSMUSG00000058216	false
10712	TF-TG	ENSMUSG00000026815 (TF-TG) ENSMUSG00000058624	false
14807	TF-TG	ENSMUSG00000035158 (TF-TG) ENSMUSG00000027381	false
10709	TF-TG	ENSMUSG00000026815 (TF-TG) ENSMUSG00000058799	false
14803	TF-TG	ENSMUSG00000035158 (TF-TG) ENSMUSG00000027878	false
10707	TF-TG	ENSMUSG00000026815 (TF-TG) ENSMUSG00000059013	false
14801	TF-TG	ENSMUSG00000035158 (TF-TG) ENSMUSG00000028341	false
14798	TF-TG	ENSMUSG00000035158 (TF-TG) ENSMUSG00000028560	false
14797	TF-TG	ENSMUSG00000035158 (TF-TG) ENSMUSG00000028614	false
14794	TF-TG	ENSMUSG00000035158 (TF-TG) ENSMUSG00000029177	false
10698	TF-TG	ENSMUSG00000026815 (TF-TG) ENSMUSG00000060063	false
14793	TF-TG	ENSMUSG00000035158 (TF-TG) ENSMUSG00000029436	false
10697	TF-TG	ENSMUSG00000026815 (TF-TG) ENSMUSG00000060519	false
14792	TF-TG	ENSMUSG00000035158 (TF-TG) ENSMUSG00000029470	false
10696	TF-TG	ENSMUSG00000026815 (TF-TG) ENSMUSG00000060548	false
10694	TF-TG	ENSMUSG00000026815 (TF-TG) ENSMUSG00000061414	false
14787	TF-TG	ENSMUSG00000035158 (TF-TG) ENSMUSG00000030275	false
14786	TF-TG	ENSMUSG00000035158 (TF-TG) ENSMUSG00000030340	false
10690	TF-TG	ENSMUSG00000026815 (TF-TG) ENSMUSG00000061718	false
10688	TF-TG	ENSMUSG00000026815 (TF-TG) ENSMUSG00000062078	false
14781	TF-TG	ENSMUSG00000035158 (TF-TG) ENSMUSG00000031367	false
14779	TF-TG	ENSMUSG00000035158 (TF-TG) ENSMUSG00000031903	false
10681	TF-TG	ENSMUSG00000026815 (TF-TG) ENSMUSG00000062859	false
10679	TF-TG	ENSMUSG00000026815 (TF-TG) ENSMUSG00000063568	false
14772	TF-TG	ENSMUSG00000035158 (TF-TG) ENSMUSG00000032640	false
14771	TF-TG	ENSMUSG00000035158 (TF-TG) ENSMUSG00000032783	false
14770	TF-TG	ENSMUSG00000035158 (TF-TG) ENSMUSG00000033530	false
14769	TF-TG	ENSMUSG00000035158 (TF-TG) ENSMUSG00000033684	false
10673	TF-TG	ENSMUSG00000026815 (TF-TG) ENSMUSG00000064215	false
14767	TF-TG	ENSMUSG00000035158 (TF-TG) ENSMUSG00000034116	false
14766	TF-TG	ENSMUSG00000035158 (TF-TG) ENSMUSG00000034317	false
14765	TF-TG	ENSMUSG00000035158 (TF-TG) ENSMUSG00000034586	false
14761	TF-TG	ENSMUSG00000035158 (TF-TG) ENSMUSG00000037235	false
14758	TF-TG	ENSMUSG00000035158 (TF-TG) ENSMUSG00000038175	false
14757	TF-TG	ENSMUSG00000035158 (TF-TG) ENSMUSG00000038451	false
10661	TF-TG	ENSMUSG00000026815 (TF-TG) ENSMUSG00000068877	false
14755	TF-TG	ENSMUSG00000035158 (TF-TG) ENSMUSG00000039050	false
14754	TF-TG	ENSMUSG00000035158 (TF-TG) ENSMUSG00000039158	false
10658	TF-TG	ENSMUSG00000026815 (TF-TG) ENSMUSG00000069515	false
14752	TF-TG	ENSMUSG00000035158 (TF-TG) ENSMUSG00000039621	false
10650	TF-TG	ENSMUSG00000026815 (TF-TG) ENSMUSG00000070407	false
14738	TF-TG	ENSMUSG00000035158 (TF-TG) ENSMUSG00000043004	false
10640	TF-TG	ENSMUSG00000026815 (TF-TG) ENSMUSG00000071547	false
14734	TF-TG	ENSMUSG00000035158 (TF-TG) ENSMUSG00000045817	false
14731	TF-TG	ENSMUSG00000035158 (TF-TG) ENSMUSG00000047003	false
10633	TF-TG	ENSMUSG00000026815 (TF-TG) ENSMUSG00000072620	false
14728	TF-TG	ENSMUSG00000035158 (TF-TG) ENSMUSG00000047986	false
14727	TF-TG	ENSMUSG00000035158 (TF-TG) ENSMUSG00000048058	false
10625	TF-TG	ENSMUSG00000026815 (TF-TG) ENSMUSG00000074217	false
10623	TF-TG	ENSMUSG00000026815 (TF-TG) ENSMUSG00000074476	false
10622	TF-TG	ENSMUSG00000026815 (TF-TG) ENSMUSG00000074604	false
14717	TF-TG	ENSMUSG00000035158 (TF-TG) ENSMUSG00000052087	false
14716	TF-TG	ENSMUSG00000035158 (TF-TG) ENSMUSG00000052331	false
10619	TF-TG	ENSMUSG00000026815 (TF-TG) ENSMUSG00000074715	false
14714	TF-TG	ENSMUSG00000035158 (TF-TG) ENSMUSG00000054321	false
14713	TF-TG	ENSMUSG00000035158 (TF-TG) ENSMUSG00000054342	false
14711	TF-TG	ENSMUSG00000035158 (TF-TG) ENSMUSG00000054920	false
10612	TF-TG	ENSMUSG00000026815 (TF-TG) ENSMUSG00000075502	false
10609	TF-TG	ENSMUSG00000026815 (TF-TG) ENSMUSG00000075702	false
14703	TF-TG	ENSMUSG00000035158 (TF-TG) ENSMUSG00000058145	false
10607	TF-TG	ENSMUSG00000026815 (TF-TG) ENSMUSG00000078202	false
14701	TF-TG	ENSMUSG00000035158 (TF-TG) ENSMUSG00000059013	false
14700	TF-TG	ENSMUSG00000035158 (TF-TG) ENSMUSG00000061414	false
10604	TF-TG	ENSMUSG00000026815 (TF-TG) ENSMUSG00000078650	false
14698	TF-TG	ENSMUSG00000035158 (TF-TG) ENSMUSG00000062078	false
10602	TF-TG	ENSMUSG00000026815 (TF-TG) ENSMUSG00000078984	false
10601	TF-TG	ENSMUSG00000026815 (TF-TG) ENSMUSG00000079037	false
14695	TF-TG	ENSMUSG00000035158 (TF-TG) ENSMUSG00000063568	false
14694	TF-TG	ENSMUSG00000035158 (TF-TG) ENSMUSG00000064215	false
10598	TF-TG	ENSMUSG00000026815 (TF-TG) ENSMUSG00000079442	false
10596	TF-TG	ENSMUSG00000026815 (TF-TG) ENSMUSG00000079654	false
14690	TF-TG	ENSMUSG00000035158 (TF-TG) ENSMUSG00000074217	false
14689	TF-TG	ENSMUSG00000035158 (TF-TG) ENSMUSG00000074604	false
14688	TF-TG	ENSMUSG00000035158 (TF-TG) ENSMUSG00000074715	false
14687	TF-TG	ENSMUSG00000035158 (TF-TG) ENSMUSG00000079037	false
14683	TF-lincRNA	ENSMUSG00000035158 (TF-lincRNA) ENSMUSG00000084797	false
10576	TF-lincRNA	ENSMUSG00000026815 (TF-lincRNA) ENSMUSG00000084797	false
14537	TF-TG	ENSMUSG00000037583 (TF-TG) ENSMUSG00000019066	false
14536	TF-TG	ENSMUSG00000037583 (TF-TG) ENSMUSG00000020712	false
14533	TF-TG	ENSMUSG00000037583 (TF-TG) ENSMUSG00000024301	false
14532	TF-TG	ENSMUSG00000037583 (TF-TG) ENSMUSG00000024590	false
14531	TF-TG	ENSMUSG00000037583 (TF-TG) ENSMUSG00000026321	false
14530	TF-TG	ENSMUSG00000037583 (TF-TG) ENSMUSG00000026509	false
14528	TF-TG	ENSMUSG00000037583 (TF-TG) ENSMUSG00000027878	false
14525	TF-TG	ENSMUSG00000037583 (TF-TG) ENSMUSG00000028560	false
14522	TF-TG	ENSMUSG00000037583 (TF-TG) ENSMUSG00000034858	false
14521	TF-TG	ENSMUSG00000037583 (TF-TG) ENSMUSG00000034883	false
14519	TF-TG	ENSMUSG00000037583 (TF-TG) ENSMUSG00000038175	false
14515	TF-TG	ENSMUSG00000037583 (TF-TG) ENSMUSG00000071547	false
8228	TF-TG	ENSMUSG00000026610 (TF-TG) ENSMUSG00000020897	false
8226	TF-TG	ENSMUSG00000026610 (TF-TG) ENSMUSG00000060063	false
5944	TF-TG	ENSMUSG00000032238 (TF-TG) ENSMUSG00000002885	false
5939	TF-TG	ENSMUSG00000032238 (TF-TG) ENSMUSG00000004151	false
5938	TF-TG	ENSMUSG00000032238 (TF-TG) ENSMUSG00000004366	false
5935	TF-TG	ENSMUSG00000032238 (TF-TG) ENSMUSG00000005410	false
5928	TF-TG	ENSMUSG00000032238 (TF-TG) ENSMUSG00000006784	false
5920	TF-TG	ENSMUSG00000032238 (TF-TG) ENSMUSG00000015396	false
5917	TF-TG	ENSMUSG00000032238 (TF-TG) ENSMUSG00000016526	false
5912	TF-TG	ENSMUSG00000032238 (TF-TG) ENSMUSG00000017446	false
5905	TF-TG	ENSMUSG00000032238 (TF-TG) ENSMUSG00000018486	false
5903	TF-TG	ENSMUSG00000032238 (TF-TG) ENSMUSG00000019188	false
5900	TF-TG	ENSMUSG00000032238 (TF-TG) ENSMUSG00000019302	false
5898	TF-TG	ENSMUSG00000032238 (TF-TG) ENSMUSG00000019564	false
5897	TF-TG	ENSMUSG00000032238 (TF-TG) ENSMUSG00000019773	false
5893	TF-TG	ENSMUSG00000032238 (TF-TG) ENSMUSG00000019947	false
5892	TF-TG	ENSMUSG00000032238 (TF-TG) ENSMUSG00000019986	false
5889	TF-TG	ENSMUSG00000032238 (TF-TG) ENSMUSG00000020135	false
5887	TF-TG	ENSMUSG00000032238 (TF-TG) ENSMUSG00000020472	false
5883	TF-TG	ENSMUSG00000032238 (TF-TG) ENSMUSG00000020668	false
5882	TF-TG	ENSMUSG00000032238 (TF-TG) ENSMUSG00000020712	false
5881	TF-TG	ENSMUSG00000032238 (TF-TG) ENSMUSG00000020741	false
5879	TF-TG	ENSMUSG00000032238 (TF-TG) ENSMUSG00000020894	false
5878	TF-TG	ENSMUSG00000032238 (TF-TG) ENSMUSG00000020897	false
5871	TF-TG	ENSMUSG00000032238 (TF-TG) ENSMUSG00000021221	false
5870	TF-TG	ENSMUSG00000032238 (TF-TG) ENSMUSG00000021281	false
5867	TF-TG	ENSMUSG00000032238 (TF-TG) ENSMUSG00000021539	false
5864	TF-TG	ENSMUSG00000032238 (TF-TG) ENSMUSG00000021725	false
5860	TF-TG	ENSMUSG00000032238 (TF-TG) ENSMUSG00000022136	false
5858	TF-TG	ENSMUSG00000032238 (TF-TG) ENSMUSG00000022177	false
5856	TF-TG	ENSMUSG00000032238 (TF-TG) ENSMUSG00000022332	false
5854	TF-TG	ENSMUSG00000032238 (TF-TG) ENSMUSG00000022360	false
5853	TF-TG	ENSMUSG00000032238 (TF-TG) ENSMUSG00000022385	false
5852	TF-TG	ENSMUSG00000032238 (TF-TG) ENSMUSG00000022436	false
5851	TF-TG	ENSMUSG00000032238 (TF-TG) ENSMUSG00000022528	false
5850	TF-TG	ENSMUSG00000032238 (TF-TG) ENSMUSG00000022748	false
5848	TF-TG	ENSMUSG00000032238 (TF-TG) ENSMUSG00000022864	false
5837	TF-TG	ENSMUSG00000032238 (TF-TG) ENSMUSG00000024301	false
5834	TF-TG	ENSMUSG00000032238 (TF-TG) ENSMUSG00000024525	false
5833	TF-TG	ENSMUSG00000032238 (TF-TG) ENSMUSG00000024590	false
5832	TF-TG	ENSMUSG00000032238 (TF-TG) ENSMUSG00000024621	false
5831	TF-TG	ENSMUSG00000032238 (TF-TG) ENSMUSG00000024644	false
5828	TF-TG	ENSMUSG00000032238 (TF-TG) ENSMUSG00000024795	false
5824	TF-TG	ENSMUSG00000032238 (TF-TG) ENSMUSG00000025019	false
5823	TF-TG	ENSMUSG00000032238 (TF-TG) ENSMUSG00000025059	false
5813	TF-TG	ENSMUSG00000032238 (TF-TG) ENSMUSG00000025584	false
5812	TF-TG	ENSMUSG00000032238 (TF-TG) ENSMUSG00000025758	false
5805	TF-TG	ENSMUSG00000032238 (TF-TG) ENSMUSG00000026429	false
5803	TF-TG	ENSMUSG00000032238 (TF-TG) ENSMUSG00000026480	false
5798	TF-TG	ENSMUSG00000032238 (TF-TG) ENSMUSG00000026785	false
5797	TF-TG	ENSMUSG00000032238 (TF-TG) ENSMUSG00000026786	false
5796	TF-TG	ENSMUSG00000032238 (TF-TG) ENSMUSG00000026815	false
5795	TF-TG	ENSMUSG00000032238 (TF-TG) ENSMUSG00000026879	false
5794	TF-TG	ENSMUSG00000032238 (TF-TG) ENSMUSG00000026921	false
5792	TF-TG	ENSMUSG00000032238 (TF-TG) ENSMUSG00000027009	false
5789	TF-TG	ENSMUSG00000032238 (TF-TG) ENSMUSG00000027326	false
5787	TF-TG	ENSMUSG00000032238 (TF-TG) ENSMUSG00000027454	false
5786	TF-TG	ENSMUSG00000032238 (TF-TG) ENSMUSG00000027456	false
5782	TF-TG	ENSMUSG00000032238 (TF-TG) ENSMUSG00000027514	false
5778	TF-TG	ENSMUSG00000032238 (TF-TG) ENSMUSG00000027878	false
5777	TF-TG	ENSMUSG00000032238 (TF-TG) ENSMUSG00000027890	false
5775	TF-TG	ENSMUSG00000032238 (TF-TG) ENSMUSG00000028076	false
5771	TF-TG	ENSMUSG00000032238 (TF-TG) ENSMUSG00000028341	false
5769	TF-TG	ENSMUSG00000032238 (TF-TG) ENSMUSG00000028614	false
5767	TF-TG	ENSMUSG00000032238 (TF-TG) ENSMUSG00000028832	false
5766	TF-TG	ENSMUSG00000032238 (TF-TG) ENSMUSG00000028884	false
5765	TF-TG	ENSMUSG00000032238 (TF-TG) ENSMUSG00000028972	false
5764	TF-TG	ENSMUSG00000032238 (TF-TG) ENSMUSG00000029163	false
5763	TF-TG	ENSMUSG00000032238 (TF-TG) ENSMUSG00000029166	false
5762	TF-TG	ENSMUSG00000032238 (TF-TG) ENSMUSG00000029177	false
5761	TF-TG	ENSMUSG00000032238 (TF-TG) ENSMUSG00000029185	false
5757	TF-TG	ENSMUSG00000032238 (TF-TG) ENSMUSG00000029470	false
5752	TF-TG	ENSMUSG00000032238 (TF-TG) ENSMUSG00000029650	false
5745	TF-TG	ENSMUSG00000032238 (TF-TG) ENSMUSG00000030483	false
5744	TF-TG	ENSMUSG00000032238 (TF-TG) ENSMUSG00000030543	false
5739	TF-TG	ENSMUSG00000032238 (TF-TG) ENSMUSG00000030935	false
5736	TF-TG	ENSMUSG00000032238 (TF-TG) ENSMUSG00000031586	false
5731	TF-TG	ENSMUSG00000032238 (TF-TG) ENSMUSG00000031849	false
5729	TF-TG	ENSMUSG00000032238 (TF-TG) ENSMUSG00000031903	false
5726	TF-TG	ENSMUSG00000032238 (TF-TG) ENSMUSG00000032120	false
5722	TF-TG	ENSMUSG00000032238 (TF-TG) ENSMUSG00000032373	false
5721	TF-TG	ENSMUSG00000032238 (TF-TG) ENSMUSG00000032380	false
5716	TF-TG	ENSMUSG00000032238 (TF-TG) ENSMUSG00000032783	false
5713	TF-TG	ENSMUSG00000032238 (TF-TG) ENSMUSG00000033222	false
5712	TF-TG	ENSMUSG00000032238 (TF-TG) ENSMUSG00000033287	false
5711	TF-TG	ENSMUSG00000032238 (TF-TG) ENSMUSG00000033684	false
5709	TF-TG	ENSMUSG00000032238 (TF-TG) ENSMUSG00000034112	false
5704	TF-TG	ENSMUSG00000032238 (TF-TG) ENSMUSG00000034773	false
5703	TF-TG	ENSMUSG00000032238 (TF-TG) ENSMUSG00000034858	false
5702	TF-TG	ENSMUSG00000032238 (TF-TG) ENSMUSG00000034883	false
5700	TF-TG	ENSMUSG00000032238 (TF-TG) ENSMUSG00000035158	false
5697	TF-TG	ENSMUSG00000032238 (TF-TG) ENSMUSG00000035486	false
5688	TF-TG	ENSMUSG00000032238 (TF-TG) ENSMUSG00000036995	false
5687	TF-TG	ENSMUSG00000032238 (TF-TG) ENSMUSG00000037447	false
5685	TF-TG	ENSMUSG00000032238 (TF-TG) ENSMUSG00000037583	false
5683	TF-TG	ENSMUSG00000032238 (TF-TG) ENSMUSG00000037621	false
5680	TF-TG	ENSMUSG00000032238 (TF-TG) ENSMUSG00000038039	false
5677	TF-TG	ENSMUSG00000032238 (TF-TG) ENSMUSG00000038451	false
5674	TF-TG	ENSMUSG00000032238 (TF-TG) ENSMUSG00000038745	false
5672	TF-TG	ENSMUSG00000032238 (TF-TG) ENSMUSG00000039157	false
5669	TF-TG	ENSMUSG00000032238 (TF-TG) ENSMUSG00000039676	false
5666	TF-TG	ENSMUSG00000032238 (TF-TG) ENSMUSG00000039982	false
5656	TF-TG	ENSMUSG00000032238 (TF-TG) ENSMUSG00000040860	false
5655	TF-TG	ENSMUSG00000032238 (TF-TG) ENSMUSG00000040918	false
5654	TF-TG	ENSMUSG00000032238 (TF-TG) ENSMUSG00000041064	false
5651	TF-TG	ENSMUSG00000032238 (TF-TG) ENSMUSG00000042109	false
5650	TF-TG	ENSMUSG00000032238 (TF-TG) ENSMUSG00000042115	false
5647	TF-TG	ENSMUSG00000032238 (TF-TG) ENSMUSG00000042429	false
5645	TF-TG	ENSMUSG00000032238 (TF-TG) ENSMUSG00000043004	false
5640	TF-TG	ENSMUSG00000032238 (TF-TG) ENSMUSG00000044456	false
5637	TF-TG	ENSMUSG00000032238 (TF-TG) ENSMUSG00000045817	false
5636	TF-TG	ENSMUSG00000032238 (TF-TG) ENSMUSG00000045932	false
5635	TF-TG	ENSMUSG00000032238 (TF-TG) ENSMUSG00000046070	false
5627	TF-TG	ENSMUSG00000032238 (TF-TG) ENSMUSG00000046711	false
5625	TF-TG	ENSMUSG00000032238 (TF-TG) ENSMUSG00000047139	false
5622	TF-TG	ENSMUSG00000032238 (TF-TG) ENSMUSG00000047534	false
5617	TF-TG	ENSMUSG00000032238 (TF-TG) ENSMUSG00000049723	false
5616	TF-TG	ENSMUSG00000032238 (TF-TG) ENSMUSG00000049807	false
5615	TF-TG	ENSMUSG00000032238 (TF-TG) ENSMUSG00000049907	false
5608	TF-TG	ENSMUSG00000032238 (TF-TG) ENSMUSG00000051498	false
5602	TF-TG	ENSMUSG00000032238 (TF-TG) ENSMUSG00000053334	false
5597	TF-TG	ENSMUSG00000032238 (TF-TG) ENSMUSG00000054717	false
5595	TF-TG	ENSMUSG00000032238 (TF-TG) ENSMUSG00000054920	false
5593	TF-TG	ENSMUSG00000032238 (TF-TG) ENSMUSG00000055612	false
5583	TF-TG	ENSMUSG00000032238 (TF-TG) ENSMUSG00000057092	false
5579	TF-TG	ENSMUSG00000032238 (TF-TG) ENSMUSG00000058145	false
5578	TF-TG	ENSMUSG00000032238 (TF-TG) ENSMUSG00000058216	false
5577	TF-TG	ENSMUSG00000032238 (TF-TG) ENSMUSG00000058624	false
5576	TF-TG	ENSMUSG00000032238 (TF-TG) ENSMUSG00000059013	false
5566	TF-TG	ENSMUSG00000032238 (TF-TG) ENSMUSG00000061718	false
5564	TF-TG	ENSMUSG00000032238 (TF-TG) ENSMUSG00000062078	false
5561	TF-TG	ENSMUSG00000032238 (TF-TG) ENSMUSG00000062859	false
5555	TF-TG	ENSMUSG00000032238 (TF-TG) ENSMUSG00000064215	false
5549	TF-TG	ENSMUSG00000032238 (TF-TG) ENSMUSG00000068877	false
5547	TF-TG	ENSMUSG00000032238 (TF-TG) ENSMUSG00000069515	false
5542	TF-TG	ENSMUSG00000032238 (TF-TG) ENSMUSG00000070407	false
5537	TF-TG	ENSMUSG00000032238 (TF-TG) ENSMUSG00000071547	false
5529	TF-TG	ENSMUSG00000032238 (TF-TG) ENSMUSG00000074476	false
5527	TF-TG	ENSMUSG00000032238 (TF-TG) ENSMUSG00000075702	false
5524	TF-TG	ENSMUSG00000032238 (TF-TG) ENSMUSG00000078650	false
5521	TF-TG	ENSMUSG00000032238 (TF-TG) ENSMUSG00000079037	false
5519	TF-TG	ENSMUSG00000032238 (TF-TG) ENSMUSG00000079442	false
5510	TF-lincRNA	ENSMUSG00000032238 (TF-lincRNA) ENSMUSG00000084797	false
11650	TF-TG	ENSMUSG00000017724 (TF-TG) ENSMUSG00000026728	false
11630	TF-TG	ENSMUSG00000026815 (TF-TG) ENSMUSG00000002489	false
11625	TF-TG	ENSMUSG00000026815 (TF-TG) ENSMUSG00000002885	false
11624	TF-TG	ENSMUSG00000026815 (TF-TG) ENSMUSG00000002997	false
11611	TF-TG	ENSMUSG00000026815 (TF-TG) ENSMUSG00000004151	false
11610	TF-TG	ENSMUSG00000026815 (TF-TG) ENSMUSG00000004366	false
11607	TF-TG	ENSMUSG00000026815 (TF-TG) ENSMUSG00000004952	false
11605	TF-TG	ENSMUSG00000026815 (TF-TG) ENSMUSG00000005370	false
11604	TF-TG	ENSMUSG00000026815 (TF-TG) ENSMUSG00000005410	false
11602	TF-TG	ENSMUSG00000026815 (TF-TG) ENSMUSG00000005533	false
11591	TF-TG	ENSMUSG00000026815 (TF-TG) ENSMUSG00000006784	false
11574	TF-TG	ENSMUSG00000026815 (TF-TG) ENSMUSG00000012443	false
11569	TF-TG	ENSMUSG00000026815 (TF-TG) ENSMUSG00000014351	false
11566	TF-TG	ENSMUSG00000026815 (TF-TG) ENSMUSG00000015396	false
11564	TF-TG	ENSMUSG00000026815 (TF-TG) ENSMUSG00000015745	false
11560	TF-TG	ENSMUSG00000026815 (TF-TG) ENSMUSG00000016526	false
11557	TF-TG	ENSMUSG00000026815 (TF-TG) ENSMUSG00000017204	false
11556	TF-TG	ENSMUSG00000026815 (TF-TG) ENSMUSG00000017446	false
11555	TF-TG	ENSMUSG00000026815 (TF-TG) ENSMUSG00000017466	false
11550	TF-TG	ENSMUSG00000026815 (TF-TG) ENSMUSG00000017652	false
11547	TF-TG	ENSMUSG00000026815 (TF-TG) ENSMUSG00000017724	false
11546	TF-TG	ENSMUSG00000026815 (TF-TG) ENSMUSG00000017861	false
11543	TF-TG	ENSMUSG00000026815 (TF-TG) ENSMUSG00000018486	false
11540	TF-TG	ENSMUSG00000026815 (TF-TG) ENSMUSG00000018740	false
11537	TF-TG	ENSMUSG00000026815 (TF-TG) ENSMUSG00000019066	false
11536	TF-TG	ENSMUSG00000026815 (TF-TG) ENSMUSG00000019188	false
11533	TF-TG	ENSMUSG00000026815 (TF-TG) ENSMUSG00000019302	false
11531	TF-TG	ENSMUSG00000026815 (TF-TG) ENSMUSG00000019564	false
11529	TF-TG	ENSMUSG00000026815 (TF-TG) ENSMUSG00000019773	false
13576	TF-TG	ENSMUSG00000019982 (TF-TG) ENSMUSG00000004952	false
13575	TF-TG	ENSMUSG00000019982 (TF-TG) ENSMUSG00000005533	false
11525	TF-TG	ENSMUSG00000026815 (TF-TG) ENSMUSG00000019942	false
11524	TF-TG	ENSMUSG00000026815 (TF-TG) ENSMUSG00000019947	false
11523	TF-TG	ENSMUSG00000026815 (TF-TG) ENSMUSG00000019982	false
11522	TF-TG	ENSMUSG00000026815 (TF-TG) ENSMUSG00000019986	false
11521	TF-TG	ENSMUSG00000026815 (TF-TG) ENSMUSG00000020034	false
11518	TF-TG	ENSMUSG00000026815 (TF-TG) ENSMUSG00000020135	false
13565	TF-TG	ENSMUSG00000019982 (TF-TG) ENSMUSG00000019188	false
13563	TF-TG	ENSMUSG00000019982 (TF-TG) ENSMUSG00000019564	false
11514	TF-TG	ENSMUSG00000026815 (TF-TG) ENSMUSG00000020185	false
13561	TF-TG	ENSMUSG00000019982 (TF-TG) ENSMUSG00000019947	false
11511	TF-TG	ENSMUSG00000026815 (TF-TG) ENSMUSG00000020230	false
13558	TF-TG	ENSMUSG00000019982 (TF-TG) ENSMUSG00000020712	false
13557	TF-TG	ENSMUSG00000019982 (TF-TG) ENSMUSG00000020741	false
13555	TF-TG	ENSMUSG00000019982 (TF-TG) ENSMUSG00000021725	false
11507	TF-TG	ENSMUSG00000026815 (TF-TG) ENSMUSG00000020424	false
13552	TF-TG	ENSMUSG00000019982 (TF-TG) ENSMUSG00000022385	false
11503	TF-TG	ENSMUSG00000026815 (TF-TG) ENSMUSG00000020472	false
13550	TF-TG	ENSMUSG00000019982 (TF-TG) ENSMUSG00000022864	false
13549	TF-TG	ENSMUSG00000019982 (TF-TG) ENSMUSG00000024151	false
11501	TF-TG	ENSMUSG00000026815 (TF-TG) ENSMUSG00000020577	false
13548	TF-TG	ENSMUSG00000019982 (TF-TG) ENSMUSG00000024301	false
13545	TF-TG	ENSMUSG00000019982 (TF-TG) ENSMUSG00000024525	false
11497	TF-TG	ENSMUSG00000026815 (TF-TG) ENSMUSG00000020668	false
13544	TF-TG	ENSMUSG00000019982 (TF-TG) ENSMUSG00000024575	false
13543	TF-TG	ENSMUSG00000019982 (TF-TG) ENSMUSG00000024590	false
11495	TF-TG	ENSMUSG00000026815 (TF-TG) ENSMUSG00000020712	false
13542	TF-TG	ENSMUSG00000019982 (TF-TG) ENSMUSG00000024621	false
11493	TF-TG	ENSMUSG00000026815 (TF-TG) ENSMUSG00000020741	false
11490	TF-TG	ENSMUSG00000026815 (TF-TG) ENSMUSG00000020894	false
13537	TF-TG	ENSMUSG00000019982 (TF-TG) ENSMUSG00000025154	false
11489	TF-TG	ENSMUSG00000026815 (TF-TG) ENSMUSG00000020897	false
13534	TF-TG	ENSMUSG00000019982 (TF-TG) ENSMUSG00000026429	false
13533	TF-TG	ENSMUSG00000019982 (TF-TG) ENSMUSG00000026480	false
13531	TF-TG	ENSMUSG00000019982 (TF-TG) ENSMUSG00000026728	false
13530	TF-TG	ENSMUSG00000019982 (TF-TG) ENSMUSG00000026785	false
11482	TF-TG	ENSMUSG00000026815 (TF-TG) ENSMUSG00000021221	false
13529	TF-TG	ENSMUSG00000019982 (TF-TG) ENSMUSG00000026864	false
13528	TF-TG	ENSMUSG00000019982 (TF-TG) ENSMUSG00000026955	false
11480	TF-TG	ENSMUSG00000026815 (TF-TG) ENSMUSG00000021281	false
13526	TF-TG	ENSMUSG00000019982 (TF-TG) ENSMUSG00000027326	false
13525	TF-TG	ENSMUSG00000019982 (TF-TG) ENSMUSG00000027654	false
13524	TF-TG	ENSMUSG00000019982 (TF-TG) ENSMUSG00000027878	false
13523	TF-TG	ENSMUSG00000019982 (TF-TG) ENSMUSG00000027994	false
13521	TF-TG	ENSMUSG00000019982 (TF-TG) ENSMUSG00000028614	false
11473	TF-TG	ENSMUSG00000026815 (TF-TG) ENSMUSG00000021539	false
13518	TF-TG	ENSMUSG00000019982 (TF-TG) ENSMUSG00000028718	false
13517	TF-TG	ENSMUSG00000019982 (TF-TG) ENSMUSG00000029470	false
13516	TF-TG	ENSMUSG00000019982 (TF-TG) ENSMUSG00000029516	false
13515	TF-TG	ENSMUSG00000019982 (TF-TG) ENSMUSG00000030275	false
11467	TF-TG	ENSMUSG00000026815 (TF-TG) ENSMUSG00000021725	false
13509	TF-TG	ENSMUSG00000019982 (TF-TG) ENSMUSG00000031903	false
13505	TF-TG	ENSMUSG00000019982 (TF-TG) ENSMUSG00000032656	false
11457	TF-TG	ENSMUSG00000026815 (TF-TG) ENSMUSG00000022018	false
13503	TF-TG	ENSMUSG00000019982 (TF-TG) ENSMUSG00000033684	false
13501	TF-TG	ENSMUSG00000019982 (TF-TG) ENSMUSG00000034317	false
11453	TF-TG	ENSMUSG00000026815 (TF-TG) ENSMUSG00000022136	false
13500	TF-TG	ENSMUSG00000019982 (TF-TG) ENSMUSG00000034353	false
11451	TF-TG	ENSMUSG00000026815 (TF-TG) ENSMUSG00000022177	false
13498	TF-TG	ENSMUSG00000019982 (TF-TG) ENSMUSG00000034858	false
13497	TF-TG	ENSMUSG00000019982 (TF-TG) ENSMUSG00000035158	false
11448	TF-TG	ENSMUSG00000026815 (TF-TG) ENSMUSG00000022332	false
11446	TF-TG	ENSMUSG00000026815 (TF-TG) ENSMUSG00000022360	false
11445	TF-TG	ENSMUSG00000026815 (TF-TG) ENSMUSG00000022385	false
13492	TF-TG	ENSMUSG00000019982 (TF-TG) ENSMUSG00000038146	false
11444	TF-TG	ENSMUSG00000026815 (TF-TG) ENSMUSG00000022436	false
13488	TF-TG	ENSMUSG00000019982 (TF-TG) ENSMUSG00000039814	false
13487	TF-TG	ENSMUSG00000019982 (TF-TG) ENSMUSG00000039982	false
11439	TF-TG	ENSMUSG00000026815 (TF-TG) ENSMUSG00000022519	false
11438	TF-TG	ENSMUSG00000026815 (TF-TG) ENSMUSG00000022528	false
11433	TF-TG	ENSMUSG00000026815 (TF-TG) ENSMUSG00000022748	false
13478	TF-TG	ENSMUSG00000019982 (TF-TG) ENSMUSG00000040723	false
11428	TF-TG	ENSMUSG00000026815 (TF-TG) ENSMUSG00000022864	false
13475	TF-TG	ENSMUSG00000019982 (TF-TG) ENSMUSG00000042532	false
11426	TF-TG	ENSMUSG00000026815 (TF-TG) ENSMUSG00000022900	false
11423	TF-TG	ENSMUSG00000026815 (TF-TG) ENSMUSG00000023004	false
13470	TF-TG	ENSMUSG00000019982 (TF-TG) ENSMUSG00000046711	false
11422	TF-TG	ENSMUSG00000026815 (TF-TG) ENSMUSG00000023008	false
13469	TF-TG	ENSMUSG00000019982 (TF-TG) ENSMUSG00000047139	false
11421	TF-TG	ENSMUSG00000026815 (TF-TG) ENSMUSG00000023009	false
13467	TF-TG	ENSMUSG00000019982 (TF-TG) ENSMUSG00000047534	false
11419	TF-TG	ENSMUSG00000026815 (TF-TG) ENSMUSG00000023032	false
13466	TF-TG	ENSMUSG00000019982 (TF-TG) ENSMUSG00000048148	false
13465	TF-TG	ENSMUSG00000019982 (TF-TG) ENSMUSG00000048965	false
13464	TF-TG	ENSMUSG00000019982 (TF-TG) ENSMUSG00000049723	false
13461	TF-TG	ENSMUSG00000019982 (TF-TG) ENSMUSG00000052087	false
13458	TF-TG	ENSMUSG00000019982 (TF-TG) ENSMUSG00000054717	false
13457	TF-TG	ENSMUSG00000019982 (TF-TG) ENSMUSG00000054920	false
13456	TF-TG	ENSMUSG00000019982 (TF-TG) ENSMUSG00000055612	false
11408	TF-TG	ENSMUSG00000026815 (TF-TG) ENSMUSG00000023940	false
11403	TF-TG	ENSMUSG00000026815 (TF-TG) ENSMUSG00000024063	false
13450	TF-TG	ENSMUSG00000019982 (TF-TG) ENSMUSG00000058624	false
13448	TF-TG	ENSMUSG00000019982 (TF-TG) ENSMUSG00000061718	false
11399	TF-TG	ENSMUSG00000026815 (TF-TG) ENSMUSG00000024151	false
13445	TF-TG	ENSMUSG00000019982 (TF-TG) ENSMUSG00000062859	false
11395	TF-TG	ENSMUSG00000026815 (TF-TG) ENSMUSG00000024301	false
13440	TF-TG	ENSMUSG00000019982 (TF-TG) ENSMUSG00000072620	false
13439	TF-TG	ENSMUSG00000019982 (TF-TG) ENSMUSG00000074604	false
13438	TF-TG	ENSMUSG00000019982 (TF-TG) ENSMUSG00000075702	false
13437	TF-TG	ENSMUSG00000019982 (TF-TG) ENSMUSG00000078650	false
11386	TF-TG	ENSMUSG00000026815 (TF-TG) ENSMUSG00000024525	false
11384	TF-TG	ENSMUSG00000026815 (TF-TG) ENSMUSG00000024542	false
11382	TF-TG	ENSMUSG00000026815 (TF-TG) ENSMUSG00000024552	false
11380	TF-TG	ENSMUSG00000026815 (TF-TG) ENSMUSG00000024575	false
11379	TF-TG	ENSMUSG00000026815 (TF-TG) ENSMUSG00000024590	false
11378	TF-TG	ENSMUSG00000026815 (TF-TG) ENSMUSG00000024597	false
11376	TF-TG	ENSMUSG00000026815 (TF-TG) ENSMUSG00000024644	false
11375	TF-TG	ENSMUSG00000026815 (TF-TG) ENSMUSG00000024743	false
11371	TF-TG	ENSMUSG00000026815 (TF-TG) ENSMUSG00000024795	false
11367	TF-TG	ENSMUSG00000026815 (TF-TG) ENSMUSG00000024897	false
11361	TF-TG	ENSMUSG00000026815 (TF-TG) ENSMUSG00000025019	false
11359	TF-TG	ENSMUSG00000026815 (TF-TG) ENSMUSG00000025059	false
15454	TF-TG	ENSMUSG00000026565 (TF-TG) ENSMUSG00000024590	false
11355	TF-TG	ENSMUSG00000026815 (TF-TG) ENSMUSG00000025154	false
11350	TF-TG	ENSMUSG00000026815 (TF-TG) ENSMUSG00000025584	false
15442	TF-TG	ENSMUSG00000026565 (TF-TG) ENSMUSG00000004366	false
11346	TF-TG	ENSMUSG00000026815 (TF-TG) ENSMUSG00000025758	false
15441	TF-TG	ENSMUSG00000026565 (TF-TG) ENSMUSG00000005370	false
15440	TF-TG	ENSMUSG00000026565 (TF-TG) ENSMUSG00000005410	false
15439	TF-TG	ENSMUSG00000026565 (TF-TG) ENSMUSG00000005533	false
11340	TF-TG	ENSMUSG00000026815 (TF-TG) ENSMUSG00000026102	false
11337	TF-TG	ENSMUSG00000026815 (TF-TG) ENSMUSG00000026255	false
15432	TF-TG	ENSMUSG00000026565 (TF-TG) ENSMUSG00000006784	false
11335	TF-TG	ENSMUSG00000026815 (TF-TG) ENSMUSG00000026281	false
15429	TF-TG	ENSMUSG00000026565 (TF-TG) ENSMUSG00000012443	false
11333	TF-TG	ENSMUSG00000026815 (TF-TG) ENSMUSG00000026321	false
15426	TF-TG	ENSMUSG00000026565 (TF-TG) ENSMUSG00000014351	false
11329	TF-TG	ENSMUSG00000026815 (TF-TG) ENSMUSG00000026360	false
15424	TF-TG	ENSMUSG00000026565 (TF-TG) ENSMUSG00000015396	false
15422	TF-TG	ENSMUSG00000026565 (TF-TG) ENSMUSG00000016526	false
11326	TF-TG	ENSMUSG00000026815 (TF-TG) ENSMUSG00000026429	false
15421	TF-TG	ENSMUSG00000026565 (TF-TG) ENSMUSG00000017204	false
15420	TF-TG	ENSMUSG00000026565 (TF-TG) ENSMUSG00000017446	false
15419	TF-TG	ENSMUSG00000026565 (TF-TG) ENSMUSG00000017466	false
11320	TF-TG	ENSMUSG00000026815 (TF-TG) ENSMUSG00000026509	false
15414	TF-TG	ENSMUSG00000026565 (TF-TG) ENSMUSG00000017861	false
11317	TF-TG	ENSMUSG00000026815 (TF-TG) ENSMUSG00000026565	false
11316	TF-TG	ENSMUSG00000026815 (TF-TG) ENSMUSG00000026605	false
11315	TF-TG	ENSMUSG00000026815 (TF-TG) ENSMUSG00000026610	false
15410	TF-TG	ENSMUSG00000026565 (TF-TG) ENSMUSG00000018486	false
15409	TF-TG	ENSMUSG00000026565 (TF-TG) ENSMUSG00000018740	false
15407	TF-TG	ENSMUSG00000026565 (TF-TG) ENSMUSG00000019066	false
15406	TF-TG	ENSMUSG00000026565 (TF-TG) ENSMUSG00000019188	false
11309	TF-TG	ENSMUSG00000026815 (TF-TG) ENSMUSG00000026728	false
15403	TF-TG	ENSMUSG00000026565 (TF-TG) ENSMUSG00000019564	false
11307	TF-TG	ENSMUSG00000026815 (TF-TG) ENSMUSG00000026785	false
15402	TF-TG	ENSMUSG00000026565 (TF-TG) ENSMUSG00000019773	false
11306	TF-TG	ENSMUSG00000026815 (TF-TG) ENSMUSG00000026786	false
15399	TF-TG	ENSMUSG00000026565 (TF-TG) ENSMUSG00000019942	false
11303	TF-TG	ENSMUSG00000026815 (TF-TG) ENSMUSG00000026864	false
15398	TF-TG	ENSMUSG00000026565 (TF-TG) ENSMUSG00000019947	false
11302	TF-TG	ENSMUSG00000026815 (TF-TG) ENSMUSG00000026921	false
11301	TF-TG	ENSMUSG00000026815 (TF-TG) ENSMUSG00000026923	false
15396	TF-TG	ENSMUSG00000026565 (TF-TG) ENSMUSG00000020034	false
11300	TF-TG	ENSMUSG00000026815 (TF-TG) ENSMUSG00000026930	false
15394	TF-TG	ENSMUSG00000026565 (TF-TG) ENSMUSG00000020230	false
11298	TF-TG	ENSMUSG00000026815 (TF-TG) ENSMUSG00000027009	false
15391	TF-TG	ENSMUSG00000026565 (TF-TG) ENSMUSG00000020424	false
15388	TF-TG	ENSMUSG00000026565 (TF-TG) ENSMUSG00000020577	false
11291	TF-TG	ENSMUSG00000026815 (TF-TG) ENSMUSG00000027326	false
15385	TF-TG	ENSMUSG00000026565 (TF-TG) ENSMUSG00000020712	false
15384	TF-TG	ENSMUSG00000026565 (TF-TG) ENSMUSG00000020741	false
11288	TF-TG	ENSMUSG00000026815 (TF-TG) ENSMUSG00000027381	false
11285	TF-TG	ENSMUSG00000026815 (TF-TG) ENSMUSG00000027454	false
15380	TF-TG	ENSMUSG00000026565 (TF-TG) ENSMUSG00000020897	false
11284	TF-TG	ENSMUSG00000026815 (TF-TG) ENSMUSG00000027456	false
