# Supplementary material for: Regulatory network analysis of Paneth cell and goblet cell enriched gut organoids using transcriptomics approaches
Source: Royal Society of Chemistry journal article supplement (doi:10.1039/c9mo00130a), 2019-12-10
Supplement: c9mo00130a2.cys [file c9mo00130a2.cys › CytoscapeSession-2019_09_26-21_57/tables/21371-1%3A+Cluster+3+%28Score%3A+5.923%29/LOCAL_ATTRS-org.cytoscape.model.CyNetwork-1%3A+Cluster+3+%28Score%3A+5.923%29+default+network.cytable]

"CyCSV-Version","1"
"SUID","__Annotations","name","selected"
"java.lang.Long","java.util.List<java.lang.String>","java.lang.String","java.lang.Boolean"
"","mutable","",""
"1: Cluster 3 (Score: 5.923) default network",""
"21371","","1: Cluster 3 (Score: 5.923)","false"
