# Supplementary material for: Regulatory network analysis of Paneth cell and goblet cell enriched gut organoids using transcriptomics approaches
Source: Royal Society of Chemistry journal article supplement (doi:10.1039/c9mo00130a), 2019-12-10
Supplement: c9mo00130a2.cys [file c9mo00130a2.cys › CytoscapeSession-2019_09_26-21_57/tables/21371-1%3A+Cluster+3+%28Score%3A+5.923%29/LOCAL_ATTRS-org.cytoscape.model.CyNode-1%3A+Cluster+3+%28Score%3A+5.923%29+default+node.cytable]

CyCSV-Version	1
SUID	name	selected
java.lang.Long	java.lang.String	java.lang.Boolean
1: Cluster 3 (Score: 5.923) default node
667	ENSMUSG00000046070	false
1691	ENSMUSG00000075502	false
1178	ENSMUSG00000022018	false
1689	ENSMUSG00000078202	false
1176	ENSMUSG00000024897	false
1687	ENSMUSG00000078650	false
1685	ENSMUSG00000079037	false
1170	ENSMUSG00000032338	false
2192	ENSMUSG00000017861	false
2187	ENSMUSG00000027381	false
2183	ENSMUSG00000030483	false
2179	ENSMUSG00000026565	false
2178	ENSMUSG00000024590	false
1665	ENSMUSG00000004366	false
2177	ENSMUSG00000026923	false
1149	ENSMUSG00000024151	false
1659	ENSMUSG00000014351	false
1658	ENSMUSG00000017652	false
2169	ENSMUSG00000019942	false
1142	ENSMUSG00000038146	false
2164	ENSMUSG00000028884	false
2162	ENSMUSG00000032380	false
2161	ENSMUSG00000041431	false
1136	ENSMUSG00000042532	false
2158	ENSMUSG00000022528	false
1645	ENSMUSG00000024552	false
2157	ENSMUSG00000035158	false
2155	ENSMUSG00000037583	false
1635	ENSMUSG00000027544	false
2146	ENSMUSG00000002489	false
2142	ENSMUSG00000002885	false
2141	ENSMUSG00000002997	false
2135	ENSMUSG00000004151	false
2133	ENSMUSG00000005370	false
2132	ENSMUSG00000005410	false
2131	ENSMUSG00000005533	false
1617	ENSMUSG00000034773	false
2127	ENSMUSG00000006784	false
589	ENSMUSG00000055629	false
1610	ENSMUSG00000036913	false
2120	ENSMUSG00000012443	false
1608	ENSMUSG00000037664	false
2118	ENSMUSG00000015745	false
1606	ENSMUSG00000038451	false
2116	ENSMUSG00000016526	false
2114	ENSMUSG00000017446	false
577	ENSMUSG00000057092	false
2113	ENSMUSG00000017466	false
1599	ENSMUSG00000042429	false
574	ENSMUSG00000057406	false
1596	ENSMUSG00000043639	false
2108	ENSMUSG00000018740	false
2107	ENSMUSG00000019066	false
1083	ENSMUSG00000017204	false
2106	ENSMUSG00000019302	false
2104	ENSMUSG00000019564	false
2103	ENSMUSG00000019773	false
2100	ENSMUSG00000019947	false
2099	ENSMUSG00000019982	false
1075	ENSMUSG00000018486	false
2098	ENSMUSG00000019986	false
2097	ENSMUSG00000020034	false
2096	ENSMUSG00000020185	false
2095	ENSMUSG00000020230	false
1580	ENSMUSG00000058624	false
2090	ENSMUSG00000020577	false
1577	ENSMUSG00000062859	false
2088	ENSMUSG00000020668	false
2087	ENSMUSG00000020712	false
2086	ENSMUSG00000020741	false
2081	ENSMUSG00000020897	false
2077	ENSMUSG00000021221	false
1562	ENSMUSG00000042115	false
2073	ENSMUSG00000021725	false
1557	ENSMUSG00000020472	false
1556	ENSMUSG00000020894	false
2066	ENSMUSG00000022136	false
2064	ENSMUSG00000022177	false
2062	ENSMUSG00000022360	false
2061	ENSMUSG00000022385	false
2060	ENSMUSG00000022436	false
2059	ENSMUSG00000022519	false
2056	ENSMUSG00000022748	false
1543	ENSMUSG00000051498	false
2054	ENSMUSG00000022864	false
2053	ENSMUSG00000022900	false
1028	ENSMUSG00000021539	false
2050	ENSMUSG00000023004	false
2049	ENSMUSG00000023008	false
2048	ENSMUSG00000023009	false
2045	ENSMUSG00000023032	false
2041	ENSMUSG00000023940	false
2040	ENSMUSG00000024063	false
1015	ENSMUSG00000022332	false
1526	ENSMUSG00000019188	false
2036	ENSMUSG00000024301	false
1523	ENSMUSG00000020135	false
2034	ENSMUSG00000024525	false
2033	ENSMUSG00000024542	false
1520	ENSMUSG00000020424	false
2032	ENSMUSG00000024575	false
2031	ENSMUSG00000024597	false
2030	ENSMUSG00000024644	false
2027	ENSMUSG00000024795	false
2021	ENSMUSG00000025019	false
2020	ENSMUSG00000025154	false
2016	ENSMUSG00000025584	false
2015	ENSMUSG00000025758	false
2012	ENSMUSG00000026281	false
2011	ENSMUSG00000026360	false
1499	ENSMUSG00000026480	false
2010	ENSMUSG00000026429	false
1497	ENSMUSG00000026864	false
1496	ENSMUSG00000026930	false
2008	ENSMUSG00000026509	false
2006	ENSMUSG00000026605	false
2004	ENSMUSG00000026728	false
1491	ENSMUSG00000027456	false
2002	ENSMUSG00000026785	false
2001	ENSMUSG00000026786	false
2000	ENSMUSG00000026879	false
1999	ENSMUSG00000026921	false
1997	ENSMUSG00000027009	false
1482	ENSMUSG00000029177	false
1992	ENSMUSG00000027326	false
1991	ENSMUSG00000027454	false
1988	ENSMUSG00000027514	false
1985	ENSMUSG00000027654	false
1472	ENSMUSG00000032120	false
1981	ENSMUSG00000027878	false
1980	ENSMUSG00000027994	false
1464	ENSMUSG00000034353	false
1976	ENSMUSG00000028341	false
1974	ENSMUSG00000028560	false
949	ENSMUSG00000026255	false
1971	ENSMUSG00000028614	false
1970	ENSMUSG00000028633	false
946	ENSMUSG00000026321	false
1964	ENSMUSG00000028718	false
1963	ENSMUSG00000028832	false
1962	ENSMUSG00000028874	false
938	ENSMUSG00000026610	false
1960	ENSMUSG00000029163	false
1448	ENSMUSG00000039943	false
1959	ENSMUSG00000029166	false
1958	ENSMUSG00000029185	false
1953	ENSMUSG00000029470	false
1952	ENSMUSG00000029516	false
1949	ENSMUSG00000029650	false
1947	ENSMUSG00000029847	false
1944	ENSMUSG00000030029	false
1432	ENSMUSG00000049807	false
1430	ENSMUSG00000050395	false
1941	ENSMUSG00000030275	false
1932	ENSMUSG00000031367	false
1931	ENSMUSG00000031453	false
1926	ENSMUSG00000031903	false
1413	ENSMUSG00000070407	false
1410	ENSMUSG00000072620	false
1921	ENSMUSG00000032254	false
1409	ENSMUSG00000075702	false
1916	ENSMUSG00000032373	false
891	ENSMUSG00000029096	false
1913	ENSMUSG00000032640	false
1912	ENSMUSG00000032656	false
1909	ENSMUSG00000032783	false
883	ENSMUSG00000029436	false
1906	ENSMUSG00000032965	false
1904	ENSMUSG00000033287	false
1903	ENSMUSG00000033530	false
1899	ENSMUSG00000034116	false
1383	ENSMUSG00000024743	false
1894	ENSMUSG00000034317	false
1893	ENSMUSG00000034586	false
1378	ENSMUSG00000031586	false
1890	ENSMUSG00000034858	false
866	ENSMUSG00000030340	false
1889	ENSMUSG00000034883	false
863	ENSMUSG00000030543	false
1375	ENSMUSG00000032356	false
1886	ENSMUSG00000035486	false
859	ENSMUSG00000030935	false
1883	ENSMUSG00000035901	false
1877	ENSMUSG00000036526	false
1363	ENSMUSG00000062078	false
1362	ENSMUSG00000063568	false
1872	ENSMUSG00000037235	false
1871	ENSMUSG00000037306	false
1869	ENSMUSG00000037447	false
1868	ENSMUSG00000037579	false
1866	ENSMUSG00000037628	false
1354	ENSMUSG00000017724	false
841	ENSMUSG00000031849	false
1861	ENSMUSG00000038039	false
1859	ENSMUSG00000038175	false
1344	ENSMUSG00000004952	false
829	ENSMUSG00000032238	false
828	ENSMUSG00000032278	false
1850	ENSMUSG00000039050	false
1847	ENSMUSG00000039126	false
1335	ENSMUSG00000015396	false
1845	ENSMUSG00000039157	false
1844	ENSMUSG00000039158	false
1841	ENSMUSG00000039270	false
1838	ENSMUSG00000039621	false
1837	ENSMUSG00000039683	false
1324	ENSMUSG00000021281	false
1835	ENSMUSG00000039814	false
1834	ENSMUSG00000039982	false
810	ENSMUSG00000033222	false
803	ENSMUSG00000033871	false
802	ENSMUSG00000034112	false
1314	ENSMUSG00000024621	false
1825	ENSMUSG00000040710	false
1824	ENSMUSG00000040723	false
799	ENSMUSG00000034472	false
1822	ENSMUSG00000040860	false
1310	ENSMUSG00000025059	false
1821	ENSMUSG00000040918	false
1820	ENSMUSG00000041064	false
1816	ENSMUSG00000041498	false
1304	ENSMUSG00000026102	false
1300	ENSMUSG00000026815	false
1299	ENSMUSG00000026955	false
1809	ENSMUSG00000043004	false
1296	ENSMUSG00000027890	false
1292	ENSMUSG00000028076	false
1288	ENSMUSG00000028972	false
1796	ENSMUSG00000045932	false
260	ENSMUSG00000084797	false
771	ENSMUSG00000036995	false
1282	ENSMUSG00000030263	false
1791	ENSMUSG00000047003	false
1790	ENSMUSG00000047044	false
763	ENSMUSG00000037621	false
1275	ENSMUSG00000032549	false
1272	ENSMUSG00000033684	false
1783	ENSMUSG00000047534	false
1268	ENSMUSG00000035561	false
1778	ENSMUSG00000047986	false
1777	ENSMUSG00000048058	false
1776	ENSMUSG00000048148	false
1772	ENSMUSG00000048965	false
1768	ENSMUSG00000049907	false
1254	ENSMUSG00000038745	false
1252	ENSMUSG00000039676	false
1758	ENSMUSG00000052087	false
1244	ENSMUSG00000042109	false
1756	ENSMUSG00000052135	false
1755	ENSMUSG00000052331	false
1242	ENSMUSG00000043391	false
1752	ENSMUSG00000053334	false
1239	ENSMUSG00000043953	false
1237	ENSMUSG00000044456	false
1748	ENSMUSG00000053581	false
1747	ENSMUSG00000054321	false
1746	ENSMUSG00000054342	false
1234	ENSMUSG00000045817	false
1745	ENSMUSG00000054612	false
1744	ENSMUSG00000054717	false
1231	ENSMUSG00000046711	false
1742	ENSMUSG00000054920	false
1230	ENSMUSG00000047139	false
1740	ENSMUSG00000055612	false
1218	ENSMUSG00000049723	false
1729	ENSMUSG00000058145	false
1727	ENSMUSG00000058799	false
1725	ENSMUSG00000059013	false
1212	ENSMUSG00000054200	false
1721	ENSMUSG00000060063	false
1209	ENSMUSG00000058216	false
1719	ENSMUSG00000061414	false
1206	ENSMUSG00000060519	false
1205	ENSMUSG00000060548	false
1717	ENSMUSG00000061718	false
1712	ENSMUSG00000064215	false
1199	ENSMUSG00000068877	false
1197	ENSMUSG00000069515	false
685	ENSMUSG00000043419	false
1703	ENSMUSG00000071547	false
1188	ENSMUSG00000078984	false
1187	ENSMUSG00000079442	false
1186	ENSMUSG00000079654	false
1698	ENSMUSG00000074217	false
1697	ENSMUSG00000074476	false
1696	ENSMUSG00000074604	false
1695	ENSMUSG00000074715	false
