# Supplementary material for: Regulatory network analysis of Paneth cell and goblet cell enriched gut organoids using transcriptomics approaches
Source: Royal Society of Chemistry journal article supplement (doi:10.1039/c9mo00130a), 2019-12-10
Supplement: c9mo00130a2.cys [file c9mo00130a2.cys › CytoscapeSession-2019_09_26-21_57/tables/21381-1%3A+Cluster+1+%28Score%3A+8.022%29/LOCAL_ATTRS-org.cytoscape.model.CyEdge-1%3A+Cluster+1+%28Score%3A+8.022%29+default+edge.cytable]

CyCSV-Version	1
SUID	interaction	name	selected
java.lang.Long	java.lang.String	java.lang.String	java.lang.Boolean
1: Cluster 1 (Score: 8.022) default edge
7182	TF-TG	ENSMUSG00000032035 (TF-TG) ENSMUSG00000020846	false
19467	TF-TG	ENSMUSG00000022346 (TF-TG) ENSMUSG00000056050	false
7177	TF-TG	ENSMUSG00000032035 (TF-TG) ENSMUSG00000020900	false
7176	TF-TG	ENSMUSG00000032035 (TF-TG) ENSMUSG00000020901	false
19463	TF-TG	ENSMUSG00000022346 (TF-TG) ENSMUSG00000056531	false
19462	TF-TG	ENSMUSG00000022346 (TF-TG) ENSMUSG00000056602	false
7173	TF-TG	ENSMUSG00000032035 (TF-TG) ENSMUSG00000021061	false
19458	TF-TG	ENSMUSG00000022346 (TF-TG) ENSMUSG00000056888	false
19457	TF-TG	ENSMUSG00000022346 (TF-TG) ENSMUSG00000057069	false
19455	TF-TG	ENSMUSG00000022346 (TF-TG) ENSMUSG00000057137	false
7161	TF-TG	ENSMUSG00000032035 (TF-TG) ENSMUSG00000021391	false
7160	TF-TG	ENSMUSG00000032035 (TF-TG) ENSMUSG00000021396	false
19446	TF-TG	ENSMUSG00000022346 (TF-TG) ENSMUSG00000057897	false
19444	TF-TG	ENSMUSG00000022346 (TF-TG) ENSMUSG00000058006	false
7155	TF-TG	ENSMUSG00000032035 (TF-TG) ENSMUSG00000021572	false
19442	TF-TG	ENSMUSG00000022346 (TF-TG) ENSMUSG00000058070	false
7143	TF-TG	ENSMUSG00000032035 (TF-TG) ENSMUSG00000021831	false
7141	TF-TG	ENSMUSG00000032035 (TF-TG) ENSMUSG00000021846	false
7140	TF-TG	ENSMUSG00000032035 (TF-TG) ENSMUSG00000021876	false
7138	TF-TG	ENSMUSG00000032035 (TF-TG) ENSMUSG00000021986	false
19425	TF-TG	ENSMUSG00000022346 (TF-TG) ENSMUSG00000059493	false
7136	TF-TG	ENSMUSG00000032035 (TF-TG) ENSMUSG00000022003	false
19423	TF-TG	ENSMUSG00000022346 (TF-TG) ENSMUSG00000059713	false
7134	TF-TG	ENSMUSG00000032035 (TF-TG) ENSMUSG00000022021	false
19421	TF-TG	ENSMUSG00000022346 (TF-TG) ENSMUSG00000059939	false
19420	TF-TG	ENSMUSG00000022346 (TF-TG) ENSMUSG00000059991	false
7130	TF-TG	ENSMUSG00000032035 (TF-TG) ENSMUSG00000022148	false
7127	TF-TG	ENSMUSG00000032035 (TF-TG) ENSMUSG00000022211	false
19414	TF-TG	ENSMUSG00000022346 (TF-TG) ENSMUSG00000060550	false
7126	TF-TG	ENSMUSG00000032035 (TF-TG) ENSMUSG00000022253	false
7124	TF-TG	ENSMUSG00000032035 (TF-TG) ENSMUSG00000022346	false
19411	TF-TG	ENSMUSG00000022346 (TF-TG) ENSMUSG00000060671	false
19404	TF-TG	ENSMUSG00000022346 (TF-TG) ENSMUSG00000061607	false
19399	TF-TG	ENSMUSG00000022346 (TF-TG) ENSMUSG00000062210	false
19398	TF-TG	ENSMUSG00000022346 (TF-TG) ENSMUSG00000062248	false
19395	TF-TG	ENSMUSG00000022346 (TF-TG) ENSMUSG00000062760	false
7107	TF-TG	ENSMUSG00000032035 (TF-TG) ENSMUSG00000022762	false
7106	TF-TG	ENSMUSG00000032035 (TF-TG) ENSMUSG00000022769	false
7105	TF-TG	ENSMUSG00000032035 (TF-TG) ENSMUSG00000022773	false
7103	TF-TG	ENSMUSG00000032035 (TF-TG) ENSMUSG00000022840	false
7100	TF-TG	ENSMUSG00000032035 (TF-TG) ENSMUSG00000022881	false
19387	TF-TG	ENSMUSG00000022346 (TF-TG) ENSMUSG00000063810	false
7098	TF-TG	ENSMUSG00000032035 (TF-TG) ENSMUSG00000022912	false
7096	TF-TG	ENSMUSG00000032035 (TF-TG) ENSMUSG00000022945	false
19383	TF-TG	ENSMUSG00000022346 (TF-TG) ENSMUSG00000064090	false
7088	TF-TG	ENSMUSG00000032035 (TF-TG) ENSMUSG00000023066	false
19375	TF-TG	ENSMUSG00000022346 (TF-TG) ENSMUSG00000064267	false
19372	TF-TG	ENSMUSG00000022346 (TF-TG) ENSMUSG00000065952	false
7083	TF-TG	ENSMUSG00000032035 (TF-TG) ENSMUSG00000023247	false
7082	TF-TG	ENSMUSG00000032035 (TF-TG) ENSMUSG00000023272	false
19363	TF-TG	ENSMUSG00000022346 (TF-TG) ENSMUSG00000067813	false
19359	TF-TG	ENSMUSG00000022346 (TF-TG) ENSMUSG00000068154	false
19358	TF-TG	ENSMUSG00000022346 (TF-TG) ENSMUSG00000068196	false
19356	TF-TG	ENSMUSG00000022346 (TF-TG) ENSMUSG00000068735	false
19352	TF-TG	ENSMUSG00000022346 (TF-TG) ENSMUSG00000069227	false
7064	TF-TG	ENSMUSG00000032035 (TF-TG) ENSMUSG00000024175	false
7062	TF-TG	ENSMUSG00000032035 (TF-TG) ENSMUSG00000024193	false
7060	TF-TG	ENSMUSG00000032035 (TF-TG) ENSMUSG00000024299	false
19347	TF-TG	ENSMUSG00000022346 (TF-TG) ENSMUSG00000069805	false
19346	TF-TG	ENSMUSG00000022346 (TF-TG) ENSMUSG00000069814	false
19345	TF-TG	ENSMUSG00000022346 (TF-TG) ENSMUSG00000069910	false
7057	TF-TG	ENSMUSG00000032035 (TF-TG) ENSMUSG00000024366	false
7055	TF-TG	ENSMUSG00000032035 (TF-TG) ENSMUSG00000024423	false
19340	TF-TG	ENSMUSG00000022346 (TF-TG) ENSMUSG00000070287	false
7052	TF-TG	ENSMUSG00000032035 (TF-TG) ENSMUSG00000024512	false
7051	TF-TG	ENSMUSG00000032035 (TF-TG) ENSMUSG00000024516	false
7049	TF-TG	ENSMUSG00000032035 (TF-TG) ENSMUSG00000024533	false
19334	TF-TG	ENSMUSG00000022346 (TF-TG) ENSMUSG00000070498	false
19330	TF-TG	ENSMUSG00000022346 (TF-TG) ENSMUSG00000070687	false
7041	TF-TG	ENSMUSG00000032035 (TF-TG) ENSMUSG00000024613	false
19328	TF-TG	ENSMUSG00000022346 (TF-TG) ENSMUSG00000070802	false
19327	TF-TG	ENSMUSG00000022346 (TF-TG) ENSMUSG00000070867	false
19325	TF-TG	ENSMUSG00000022346 (TF-TG) ENSMUSG00000071226	false
7034	TF-TG	ENSMUSG00000032035 (TF-TG) ENSMUSG00000024777	false
19317	TF-TG	ENSMUSG00000022346 (TF-TG) ENSMUSG00000071984	false
7028	TF-TG	ENSMUSG00000032035 (TF-TG) ENSMUSG00000024891	false
19315	TF-TG	ENSMUSG00000022346 (TF-TG) ENSMUSG00000072115	false
19314	TF-TG	ENSMUSG00000022346 (TF-TG) ENSMUSG00000072235	false
7025	TF-TG	ENSMUSG00000032035 (TF-TG) ENSMUSG00000024912	false
7022	TF-TG	ENSMUSG00000032035 (TF-TG) ENSMUSG00000024989	false
19309	TF-TG	ENSMUSG00000022346 (TF-TG) ENSMUSG00000072849	false
7021	TF-TG	ENSMUSG00000032035 (TF-TG) ENSMUSG00000025001	false
19304	TF-TG	ENSMUSG00000022346 (TF-TG) ENSMUSG00000073409	false
7016	TF-TG	ENSMUSG00000032035 (TF-TG) ENSMUSG00000025064	false
7015	TF-TG	ENSMUSG00000032035 (TF-TG) ENSMUSG00000025075	false
19297	TF-TG	ENSMUSG00000022346 (TF-TG) ENSMUSG00000074183	false
7008	TF-TG	ENSMUSG00000032035 (TF-TG) ENSMUSG00000025351	false
19291	TF-TG	ENSMUSG00000022346 (TF-TG) ENSMUSG00000074651	false
13147	TF-TG	ENSMUSG00000030199 (TF-TG) ENSMUSG00000013698	false
19290	TF-TG	ENSMUSG00000022346 (TF-TG) ENSMUSG00000074652	false
19287	TF-TG	ENSMUSG00000022346 (TF-TG) ENSMUSG00000074802	false
19283	TF-TG	ENSMUSG00000022346 (TF-TG) ENSMUSG00000074892	false
6995	TF-TG	ENSMUSG00000032035 (TF-TG) ENSMUSG00000025608	false
19282	TF-TG	ENSMUSG00000022346 (TF-TG) ENSMUSG00000074896	false
19281	TF-TG	ENSMUSG00000022346 (TF-TG) ENSMUSG00000075012	false
6993	TF-TG	ENSMUSG00000032035 (TF-TG) ENSMUSG00000025742	false
6988	TF-TG	ENSMUSG00000032035 (TF-TG) ENSMUSG00000025876	false
6986	TF-TG	ENSMUSG00000032035 (TF-TG) ENSMUSG00000025938	false
6985	TF-TG	ENSMUSG00000032035 (TF-TG) ENSMUSG00000025969	false
13128	TF-TG	ENSMUSG00000030199 (TF-TG) ENSMUSG00000027661	false
19271	TF-TG	ENSMUSG00000022346 (TF-TG) ENSMUSG00000078349	false
19265	TF-TG	ENSMUSG00000022346 (TF-TG) ENSMUSG00000078773	false
19263	TF-TG	ENSMUSG00000022346 (TF-TG) ENSMUSG00000078949	false
13118	TF-TG	ENSMUSG00000030199 (TF-TG) ENSMUSG00000031981	false
6973	TF-TG	ENSMUSG00000032035 (TF-TG) ENSMUSG00000026303	false
19259	TF-TG	ENSMUSG00000022346 (TF-TG) ENSMUSG00000079038	false
13114	TF-TG	ENSMUSG00000030199 (TF-TG) ENSMUSG00000033970	false
6970	TF-TG	ENSMUSG00000032035 (TF-TG) ENSMUSG00000026355	false
6968	TF-TG	ENSMUSG00000032035 (TF-TG) ENSMUSG00000026380	false
13110	TF-TG	ENSMUSG00000030199 (TF-TG) ENSMUSG00000039234	false
6966	TF-TG	ENSMUSG00000032035 (TF-TG) ENSMUSG00000026398	false
13108	TF-TG	ENSMUSG00000030199 (TF-TG) ENSMUSG00000039384	false
19251	TF-TG	ENSMUSG00000022346 (TF-TG) ENSMUSG00000079685	false
19250	TF-TG	ENSMUSG00000022346 (TF-TG) ENSMUSG00000081769	false
13103	TF-TG	ENSMUSG00000030199 (TF-TG) ENSMUSG00000041688	false
6959	TF-TG	ENSMUSG00000032035 (TF-TG) ENSMUSG00000026483	false
19246	TF-TG	ENSMUSG00000022346 (TF-TG) ENSMUSG00000089789	false
6957	TF-TG	ENSMUSG00000032035 (TF-TG) ENSMUSG00000026504	false
13098	TF-TG	ENSMUSG00000030199 (TF-TG) ENSMUSG00000044005	false
6952	TF-TG	ENSMUSG00000032035 (TF-TG) ENSMUSG00000026546	false
19239	TF-TG	ENSMUSG00000022346 (TF-TG) ENSMUSG00000092486	false
19236	TF-TG	ENSMUSG00000022346 (TF-TG) ENSMUSG00000094928	false
6948	TF-TG	ENSMUSG00000032035 (TF-TG) ENSMUSG00000026646	false
19235	TF-TG	ENSMUSG00000022346 (TF-TG) ENSMUSG00000095567	false
13091	TF-TG	ENSMUSG00000030199 (TF-TG) ENSMUSG00000053580	false
6947	TF-TG	ENSMUSG00000032035 (TF-TG) ENSMUSG00000026683	false
6946	TF-TG	ENSMUSG00000032035 (TF-TG) ENSMUSG00000026700	false
19231	TF-TG	ENSMUSG00000022346 (TF-TG) ENSMUSG00000096847	false
19230	TF-TG	ENSMUSG00000022346 (TF-TG) ENSMUSG00000098557	false
19225	TF-TG	ENSMUSG00000022346 (TF-TG) ENSMUSG00000110206	false
6936	TF-TG	ENSMUSG00000032035 (TF-TG) ENSMUSG00000026833	false
19220	TF-lincRNA	ENSMUSG00000022346 (TF-lincRNA) ENSMUSG00000085183	false
19219	TF-lincRNA	ENSMUSG00000022346 (TF-lincRNA) ENSMUSG00000103043	false
19218	TF-lincRNA	ENSMUSG00000022346 (TF-lincRNA) ENSMUSG00000097561	false
6929	TF-TG	ENSMUSG00000032035 (TF-TG) ENSMUSG00000027006	false
6926	TF-TG	ENSMUSG00000032035 (TF-TG) ENSMUSG00000027075	false
19212	TF-lincRNA	ENSMUSG00000022346 (TF-lincRNA) ENSMUSG00000097932	false
19211	TF-lincRNA	ENSMUSG00000022346 (TF-lincRNA) ENSMUSG00000099552	false
6923	TF-TG	ENSMUSG00000032035 (TF-TG) ENSMUSG00000027230	false
19210	TF-lincRNA	ENSMUSG00000022346 (TF-lincRNA) ENSMUSG00000097284	false
6921	TF-TG	ENSMUSG00000032035 (TF-TG) ENSMUSG00000027273	false
19200	TF-lincRNA	ENSMUSG00000022346 (TF-lincRNA) ENSMUSG00000097632	false
6911	TF-TG	ENSMUSG00000032035 (TF-TG) ENSMUSG00000027420	false
6910	TF-TG	ENSMUSG00000032035 (TF-TG) ENSMUSG00000027435	false
19193	TF-miRNA	ENSMUSG00000022346 (TF-miRNA) mmu-miR-1945	false
6901	TF-TG	ENSMUSG00000032035 (TF-TG) ENSMUSG00000027533	false
6898	TF-TG	ENSMUSG00000032035 (TF-TG) ENSMUSG00000027611	false
6896	TF-TG	ENSMUSG00000032035 (TF-TG) ENSMUSG00000027635	false
6893	TF-TG	ENSMUSG00000032035 (TF-TG) ENSMUSG00000027661	false
6887	TF-TG	ENSMUSG00000032035 (TF-TG) ENSMUSG00000027797	false
6886	TF-TG	ENSMUSG00000032035 (TF-TG) ENSMUSG00000027834	false
6883	TF-TG	ENSMUSG00000032035 (TF-TG) ENSMUSG00000027931	false
6880	TF-TG	ENSMUSG00000032035 (TF-TG) ENSMUSG00000028039	false
6870	TF-TG	ENSMUSG00000032035 (TF-TG) ENSMUSG00000028282	false
6869	TF-TG	ENSMUSG00000032035 (TF-TG) ENSMUSG00000028312	false
6867	TF-TG	ENSMUSG00000032035 (TF-TG) ENSMUSG00000028356	false
6864	TF-TG	ENSMUSG00000032035 (TF-TG) ENSMUSG00000028403	false
6863	TF-TG	ENSMUSG00000032035 (TF-TG) ENSMUSG00000028415	false
6859	TF-TG	ENSMUSG00000032035 (TF-TG) ENSMUSG00000028532	false
6857	TF-TG	ENSMUSG00000032035 (TF-TG) ENSMUSG00000028555	false
6852	TF-TG	ENSMUSG00000032035 (TF-TG) ENSMUSG00000028602	false
6848	TF-TG	ENSMUSG00000032035 (TF-TG) ENSMUSG00000028634	false
6846	TF-TG	ENSMUSG00000032035 (TF-TG) ENSMUSG00000028693	false
6845	TF-TG	ENSMUSG00000032035 (TF-TG) ENSMUSG00000028699	false
6840	TF-TG	ENSMUSG00000032035 (TF-TG) ENSMUSG00000028763	false
6838	TF-TG	ENSMUSG00000032035 (TF-TG) ENSMUSG00000028825	false
6833	TF-TG	ENSMUSG00000032035 (TF-TG) ENSMUSG00000028909	false
6831	TF-TG	ENSMUSG00000032035 (TF-TG) ENSMUSG00000028927	false
6829	TF-TG	ENSMUSG00000032035 (TF-TG) ENSMUSG00000028949	false
6827	TF-TG	ENSMUSG00000032035 (TF-TG) ENSMUSG00000028986	false
6822	TF-TG	ENSMUSG00000032035 (TF-TG) ENSMUSG00000029154	false
6814	TF-TG	ENSMUSG00000032035 (TF-TG) ENSMUSG00000029312	false
6813	TF-TG	ENSMUSG00000032035 (TF-TG) ENSMUSG00000029343	false
6811	TF-TG	ENSMUSG00000032035 (TF-TG) ENSMUSG00000029408	false
6810	TF-TG	ENSMUSG00000032035 (TF-TG) ENSMUSG00000029420	false
6790	TF-TG	ENSMUSG00000032035 (TF-TG) ENSMUSG00000029875	false
6789	TF-TG	ENSMUSG00000032035 (TF-TG) ENSMUSG00000029910	false
6785	TF-TG	ENSMUSG00000032035 (TF-TG) ENSMUSG00000030107	false
6783	TF-TG	ENSMUSG00000032035 (TF-TG) ENSMUSG00000030137	false
6782	TF-TG	ENSMUSG00000032035 (TF-TG) ENSMUSG00000030199	false
6779	TF-TG	ENSMUSG00000032035 (TF-TG) ENSMUSG00000030287	false
6778	TF-TG	ENSMUSG00000032035 (TF-TG) ENSMUSG00000030329	false
6775	TF-TG	ENSMUSG00000032035 (TF-TG) ENSMUSG00000030353	false
6767	TF-TG	ENSMUSG00000032035 (TF-TG) ENSMUSG00000030659	false
6764	TF-TG	ENSMUSG00000032035 (TF-TG) ENSMUSG00000030772	false
6743	TF-TG	ENSMUSG00000032035 (TF-TG) ENSMUSG00000031629	false
6741	TF-TG	ENSMUSG00000032035 (TF-TG) ENSMUSG00000031668	false
6739	TF-TG	ENSMUSG00000032035 (TF-TG) ENSMUSG00000031730	false
6737	TF-TG	ENSMUSG00000032035 (TF-TG) ENSMUSG00000031757	false
6736	TF-TG	ENSMUSG00000032035 (TF-TG) ENSMUSG00000031760	false
6734	TF-TG	ENSMUSG00000032035 (TF-TG) ENSMUSG00000031788	false
6733	TF-TG	ENSMUSG00000032035 (TF-TG) ENSMUSG00000031790	false
6732	TF-TG	ENSMUSG00000032035 (TF-TG) ENSMUSG00000031791	false
6731	TF-TG	ENSMUSG00000032035 (TF-TG) ENSMUSG00000031844	false
6724	TF-TG	ENSMUSG00000032035 (TF-TG) ENSMUSG00000031981	false
4674	TF-TG	ENSMUSG00000068154 (TF-TG) ENSMUSG00000001525	false
4673	TF-TG	ENSMUSG00000068154 (TF-TG) ENSMUSG00000002565	false
4672	TF-TG	ENSMUSG00000068154 (TF-TG) ENSMUSG00000002835	false
6720	TF-TG	ENSMUSG00000032035 (TF-TG) ENSMUSG00000032092	false
4670	TF-TG	ENSMUSG00000068154 (TF-TG) ENSMUSG00000003411	false
4669	TF-TG	ENSMUSG00000068154 (TF-TG) ENSMUSG00000003436	false
6716	TF-TG	ENSMUSG00000032035 (TF-TG) ENSMUSG00000032232	false
6707	TF-TG	ENSMUSG00000032035 (TF-TG) ENSMUSG00000032350	false
4656	TF-TG	ENSMUSG00000068154 (TF-TG) ENSMUSG00000007989	false
4653	TF-TG	ENSMUSG00000068154 (TF-TG) ENSMUSG00000009292	false
4649	TF-TG	ENSMUSG00000068154 (TF-TG) ENSMUSG00000010830	false
6697	TF-TG	ENSMUSG00000032035 (TF-TG) ENSMUSG00000032531	false
6696	TF-TG	ENSMUSG00000032035 (TF-TG) ENSMUSG00000032532	false
4646	TF-TG	ENSMUSG00000068154 (TF-TG) ENSMUSG00000013523	false
4637	TF-TG	ENSMUSG00000068154 (TF-TG) ENSMUSG00000017493	false
6680	TF-TG	ENSMUSG00000032035 (TF-TG) ENSMUSG00000032902	false
4628	TF-TG	ENSMUSG00000068154 (TF-TG) ENSMUSG00000018554	false
4623	TF-TG	ENSMUSG00000068154 (TF-TG) ENSMUSG00000019796	false
4620	TF-TG	ENSMUSG00000068154 (TF-TG) ENSMUSG00000019945	false
6668	TF-TG	ENSMUSG00000032035 (TF-TG) ENSMUSG00000033307	false
4614	TF-TG	ENSMUSG00000068154 (TF-TG) ENSMUSG00000020226	false
6661	TF-TG	ENSMUSG00000032035 (TF-TG) ENSMUSG00000033825	false
4611	TF-TG	ENSMUSG00000068154 (TF-TG) ENSMUSG00000020571	false
6657	TF-TG	ENSMUSG00000032035 (TF-TG) ENSMUSG00000033970	false
6654	TF-TG	ENSMUSG00000032035 (TF-TG) ENSMUSG00000034118	false
4605	TF-TG	ENSMUSG00000068154 (TF-TG) ENSMUSG00000020846	false
4603	TF-TG	ENSMUSG00000068154 (TF-TG) ENSMUSG00000020901	false
6651	TF-TG	ENSMUSG00000032035 (TF-TG) ENSMUSG00000034265	false
6646	TF-TG	ENSMUSG00000032035 (TF-TG) ENSMUSG00000034579	false
4595	TF-TG	ENSMUSG00000068154 (TF-TG) ENSMUSG00000021831	false
4594	TF-TG	ENSMUSG00000068154 (TF-TG) ENSMUSG00000021838	false
6642	TF-TG	ENSMUSG00000032035 (TF-TG) ENSMUSG00000034656	false
4593	TF-TG	ENSMUSG00000068154 (TF-TG) ENSMUSG00000021876	false
6638	TF-TG	ENSMUSG00000032035 (TF-TG) ENSMUSG00000034768	false
4589	TF-TG	ENSMUSG00000068154 (TF-TG) ENSMUSG00000022346	false
6634	TF-TG	ENSMUSG00000032035 (TF-TG) ENSMUSG00000034818	false
4585	TF-TG	ENSMUSG00000068154 (TF-TG) ENSMUSG00000022489	false
4581	TF-TG	ENSMUSG00000068154 (TF-TG) ENSMUSG00000022762	false
4579	TF-TG	ENSMUSG00000068154 (TF-TG) ENSMUSG00000022945	false
6627	TF-TG	ENSMUSG00000032035 (TF-TG) ENSMUSG00000035164	false
6623	TF-TG	ENSMUSG00000032035 (TF-TG) ENSMUSG00000035273	false
4574	TF-TG	ENSMUSG00000068154 (TF-TG) ENSMUSG00000023247	false
6621	TF-TG	ENSMUSG00000032035 (TF-TG) ENSMUSG00000035357	false
4565	TF-TG	ENSMUSG00000068154 (TF-TG) ENSMUSG00000024175	false
4564	TF-TG	ENSMUSG00000068154 (TF-TG) ENSMUSG00000024193	false
6610	TF-TG	ENSMUSG00000032035 (TF-TG) ENSMUSG00000035683	false
4560	TF-TG	ENSMUSG00000068154 (TF-TG) ENSMUSG00000024366	false
4558	TF-TG	ENSMUSG00000068154 (TF-TG) ENSMUSG00000024516	false
4556	TF-TG	ENSMUSG00000068154 (TF-TG) ENSMUSG00000024533	false
6604	TF-TG	ENSMUSG00000032035 (TF-TG) ENSMUSG00000035849	false
4551	TF-TG	ENSMUSG00000068154 (TF-TG) ENSMUSG00000024777	false
6598	TF-TG	ENSMUSG00000032035 (TF-TG) ENSMUSG00000036036	false
4549	TF-TG	ENSMUSG00000068154 (TF-TG) ENSMUSG00000024891	false
6595	TF-TG	ENSMUSG00000032035 (TF-TG) ENSMUSG00000036223	false
6594	TF-TG	ENSMUSG00000032035 (TF-TG) ENSMUSG00000036256	false
4542	TF-TG	ENSMUSG00000068154 (TF-TG) ENSMUSG00000025351	false
6588	TF-TG	ENSMUSG00000032035 (TF-TG) ENSMUSG00000036745	false
4538	TF-TG	ENSMUSG00000068154 (TF-TG) ENSMUSG00000025969	false
6586	TF-TG	ENSMUSG00000032035 (TF-TG) ENSMUSG00000036777	false
6585	TF-TG	ENSMUSG00000032035 (TF-TG) ENSMUSG00000036863	false
6583	TF-TG	ENSMUSG00000032035 (TF-TG) ENSMUSG00000036887	false
4531	TF-TG	ENSMUSG00000068154 (TF-TG) ENSMUSG00000026355	false
6579	TF-TG	ENSMUSG00000032035 (TF-TG) ENSMUSG00000036944	false
4527	TF-TG	ENSMUSG00000068154 (TF-TG) ENSMUSG00000026483	false
4525	TF-TG	ENSMUSG00000068154 (TF-TG) ENSMUSG00000026669	false
4524	TF-TG	ENSMUSG00000068154 (TF-TG) ENSMUSG00000026683	false
6572	TF-TG	ENSMUSG00000032035 (TF-TG) ENSMUSG00000037159	false
4520	TF-TG	ENSMUSG00000068154 (TF-TG) ENSMUSG00000027075	false
6566	TF-TG	ENSMUSG00000032035 (TF-TG) ENSMUSG00000037509	false
4517	TF-TG	ENSMUSG00000068154 (TF-TG) ENSMUSG00000027273	false
6564	TF-TG	ENSMUSG00000032035 (TF-TG) ENSMUSG00000037580	false
4512	TF-TG	ENSMUSG00000068154 (TF-TG) ENSMUSG00000027420	false
6558	TF-TG	ENSMUSG00000032035 (TF-TG) ENSMUSG00000037643	false
4508	TF-TG	ENSMUSG00000068154 (TF-TG) ENSMUSG00000027533	false
4507	TF-TG	ENSMUSG00000068154 (TF-TG) ENSMUSG00000027661	false
6555	TF-TG	ENSMUSG00000032035 (TF-TG) ENSMUSG00000037820	false
4502	TF-TG	ENSMUSG00000068154 (TF-TG) ENSMUSG00000027931	false
4500	TF-TG	ENSMUSG00000068154 (TF-TG) ENSMUSG00000028282	false
6548	TF-TG	ENSMUSG00000032035 (TF-TG) ENSMUSG00000038005	false
4498	TF-TG	ENSMUSG00000068154 (TF-TG) ENSMUSG00000028356	false
6546	TF-TG	ENSMUSG00000032035 (TF-TG) ENSMUSG00000038068	false
4497	TF-TG	ENSMUSG00000068154 (TF-TG) ENSMUSG00000028415	false
4496	TF-TG	ENSMUSG00000068154 (TF-TG) ENSMUSG00000028634	false
4495	TF-TG	ENSMUSG00000068154 (TF-TG) ENSMUSG00000028699	false
4493	TF-TG	ENSMUSG00000068154 (TF-TG) ENSMUSG00000028825	false
6541	TF-TG	ENSMUSG00000032035 (TF-TG) ENSMUSG00000038241	false
4492	TF-TG	ENSMUSG00000068154 (TF-TG) ENSMUSG00000028927	false
6537	TF-TG	ENSMUSG00000032035 (TF-TG) ENSMUSG00000038319	false
6536	TF-TG	ENSMUSG00000032035 (TF-TG) ENSMUSG00000038349	false
6529	TF-TG	ENSMUSG00000032035 (TF-TG) ENSMUSG00000038486	false
6526	TF-TG	ENSMUSG00000032035 (TF-TG) ENSMUSG00000038578	false
4476	TF-TG	ENSMUSG00000068154 (TF-TG) ENSMUSG00000031629	false
4475	TF-TG	ENSMUSG00000068154 (TF-TG) ENSMUSG00000031668	false
4473	TF-TG	ENSMUSG00000068154 (TF-TG) ENSMUSG00000031790	false
4471	TF-TG	ENSMUSG00000068154 (TF-TG) ENSMUSG00000031981	false
6518	TF-TG	ENSMUSG00000032035 (TF-TG) ENSMUSG00000038903	false
20850	TF-TG	ENSMUSG00000022346 (TF-TG) ENSMUSG00000000125	false
6513	TF-TG	ENSMUSG00000032035 (TF-TG) ENSMUSG00000039145	false
20846	TF-TG	ENSMUSG00000022346 (TF-TG) ENSMUSG00000000214	false
20845	TF-TG	ENSMUSG00000022346 (TF-TG) ENSMUSG00000000253	false
4461	TF-TG	ENSMUSG00000068154 (TF-TG) ENSMUSG00000032350	false
6506	TF-TG	ENSMUSG00000032035 (TF-TG) ENSMUSG00000039234	false
20839	TF-TG	ENSMUSG00000022346 (TF-TG) ENSMUSG00000000555	false
6503	TF-TG	ENSMUSG00000032035 (TF-TG) ENSMUSG00000039323	false
6502	TF-TG	ENSMUSG00000032035 (TF-TG) ENSMUSG00000039372	false
20837	TF-TG	ENSMUSG00000022346 (TF-TG) ENSMUSG00000000594	false
6501	TF-TG	ENSMUSG00000032035 (TF-TG) ENSMUSG00000039384	false
6500	TF-TG	ENSMUSG00000032035 (TF-TG) ENSMUSG00000039395	false
20835	TF-TG	ENSMUSG00000022346 (TF-TG) ENSMUSG00000001025	false
20834	TF-TG	ENSMUSG00000022346 (TF-TG) ENSMUSG00000001120	false
20829	TF-TG	ENSMUSG00000022346 (TF-TG) ENSMUSG00000001525	false
20828	TF-TG	ENSMUSG00000022346 (TF-TG) ENSMUSG00000001761	false
4443	TF-TG	ENSMUSG00000068154 (TF-TG) ENSMUSG00000034768	false
6489	TF-TG	ENSMUSG00000032035 (TF-TG) ENSMUSG00000039831	false
20824	TF-TG	ENSMUSG00000022346 (TF-TG) ENSMUSG00000001985	false
20822	TF-TG	ENSMUSG00000022346 (TF-TG) ENSMUSG00000002055	false
4436	TF-TG	ENSMUSG00000068154 (TF-TG) ENSMUSG00000035164	false
6483	TF-TG	ENSMUSG00000032035 (TF-TG) ENSMUSG00000040046	false
4431	TF-TG	ENSMUSG00000068154 (TF-TG) ENSMUSG00000035849	false
20814	TF-TG	ENSMUSG00000022346 (TF-TG) ENSMUSG00000002565	false
20812	TF-TG	ENSMUSG00000022346 (TF-TG) ENSMUSG00000002835	false
20811	TF-TG	ENSMUSG00000022346 (TF-TG) ENSMUSG00000002870	false
6475	TF-TG	ENSMUSG00000032035 (TF-TG) ENSMUSG00000040276	false
6474	TF-TG	ENSMUSG00000032035 (TF-TG) ENSMUSG00000040339	false
4425	TF-TG	ENSMUSG00000068154 (TF-TG) ENSMUSG00000036777	false
6472	TF-TG	ENSMUSG00000032035 (TF-TG) ENSMUSG00000040433	false
6471	TF-TG	ENSMUSG00000032035 (TF-TG) ENSMUSG00000040462	false
4422	TF-TG	ENSMUSG00000068154 (TF-TG) ENSMUSG00000036944	false
20804	TF-TG	ENSMUSG00000022346 (TF-TG) ENSMUSG00000003283	false
20803	TF-TG	ENSMUSG00000022346 (TF-TG) ENSMUSG00000003355	false
20802	TF-TG	ENSMUSG00000022346 (TF-TG) ENSMUSG00000003411	false
20800	TF-TG	ENSMUSG00000022346 (TF-TG) ENSMUSG00000003436	false
4416	TF-TG	ENSMUSG00000068154 (TF-TG) ENSMUSG00000037580	false
20798	TF-TG	ENSMUSG00000022346 (TF-TG) ENSMUSG00000003545	false
10558	TF-TG	ENSMUSG00000036036 (TF-TG) ENSMUSG00000000125	false
20797	TF-TG	ENSMUSG00000022346 (TF-TG) ENSMUSG00000003992	false
4413	TF-TG	ENSMUSG00000068154 (TF-TG) ENSMUSG00000037820	false
6461	TF-TG	ENSMUSG00000032035 (TF-TG) ENSMUSG00000040717	false
4411	TF-TG	ENSMUSG00000068154 (TF-TG) ENSMUSG00000038005	false
10555	TF-TG	ENSMUSG00000036036 (TF-TG) ENSMUSG00000000214	false
4409	TF-TG	ENSMUSG00000068154 (TF-TG) ENSMUSG00000038241	false
10553	TF-TG	ENSMUSG00000036036 (TF-TG) ENSMUSG00000000555	false
4407	TF-TG	ENSMUSG00000068154 (TF-TG) ENSMUSG00000038319	false
20790	TF-TG	ENSMUSG00000022346 (TF-TG) ENSMUSG00000004709	false
4406	TF-TG	ENSMUSG00000068154 (TF-TG) ENSMUSG00000038349	false
10550	TF-TG	ENSMUSG00000036036 (TF-TG) ENSMUSG00000001120	false
20789	TF-TG	ENSMUSG00000022346 (TF-TG) ENSMUSG00000004951	false
20787	TF-TG	ENSMUSG00000022346 (TF-TG) ENSMUSG00000005267	false
10545	TF-TG	ENSMUSG00000036036 (TF-TG) ENSMUSG00000001985	false
10544	TF-TG	ENSMUSG00000036036 (TF-TG) ENSMUSG00000002055	false
6446	TF-TG	ENSMUSG00000032035 (TF-TG) ENSMUSG00000041168	false
10542	TF-TG	ENSMUSG00000036036 (TF-TG) ENSMUSG00000002565	false
6445	TF-TG	ENSMUSG00000032035 (TF-TG) ENSMUSG00000041202	false
4396	TF-TG	ENSMUSG00000068154 (TF-TG) ENSMUSG00000038903	false
6444	TF-TG	ENSMUSG00000032035 (TF-TG) ENSMUSG00000041268	false
4395	TF-TG	ENSMUSG00000068154 (TF-TG) ENSMUSG00000039115	false
6442	TF-TG	ENSMUSG00000032035 (TF-TG) ENSMUSG00000041351	false
20777	TF-TG	ENSMUSG00000022346 (TF-TG) ENSMUSG00000006386	false
4393	TF-TG	ENSMUSG00000068154 (TF-TG) ENSMUSG00000039145	false
10537	TF-TG	ENSMUSG00000036036 (TF-TG) ENSMUSG00000003283	false
10536	TF-TG	ENSMUSG00000036036 (TF-TG) ENSMUSG00000003411	false
4391	TF-TG	ENSMUSG00000068154 (TF-TG) ENSMUSG00000039234	false
6439	TF-TG	ENSMUSG00000032035 (TF-TG) ENSMUSG00000041420	false
10535	TF-TG	ENSMUSG00000036036 (TF-TG) ENSMUSG00000003436	false
4390	TF-TG	ENSMUSG00000068154 (TF-TG) ENSMUSG00000039372	false
10534	TF-TG	ENSMUSG00000036036 (TF-TG) ENSMUSG00000003469	false
4389	TF-TG	ENSMUSG00000068154 (TF-TG) ENSMUSG00000039384	false
10533	TF-TG	ENSMUSG00000036036 (TF-TG) ENSMUSG00000003545	false
4388	TF-TG	ENSMUSG00000068154 (TF-TG) ENSMUSG00000039395	false
4384	TF-TG	ENSMUSG00000068154 (TF-TG) ENSMUSG00000039831	false
6431	TF-TG	ENSMUSG00000032035 (TF-TG) ENSMUSG00000041688	false
4381	TF-TG	ENSMUSG00000068154 (TF-TG) ENSMUSG00000040046	false
10525	TF-TG	ENSMUSG00000036036 (TF-TG) ENSMUSG00000004709	false
6428	TF-TG	ENSMUSG00000032035 (TF-TG) ENSMUSG00000041801	false
10524	TF-TG	ENSMUSG00000036036 (TF-TG) ENSMUSG00000004951	false
10522	TF-TG	ENSMUSG00000036036 (TF-TG) ENSMUSG00000005267	false
4377	TF-TG	ENSMUSG00000068154 (TF-TG) ENSMUSG00000040276	false
20759	TF-TG	ENSMUSG00000022346 (TF-TG) ENSMUSG00000007989	false
4373	TF-TG	ENSMUSG00000068154 (TF-TG) ENSMUSG00000040717	false
20753	TF-TG	ENSMUSG00000022346 (TF-TG) ENSMUSG00000009108	false
10513	TF-TG	ENSMUSG00000036036 (TF-TG) ENSMUSG00000007989	false
20751	TF-TG	ENSMUSG00000022346 (TF-TG) ENSMUSG00000009292	false
6412	TF-TG	ENSMUSG00000032035 (TF-TG) ENSMUSG00000042462	false
6411	TF-TG	ENSMUSG00000032035 (TF-TG) ENSMUSG00000042489	false
10507	TF-TG	ENSMUSG00000036036 (TF-TG) ENSMUSG00000009108	false
10505	TF-TG	ENSMUSG00000036036 (TF-TG) ENSMUSG00000009292	false
20744	TF-TG	ENSMUSG00000022346 (TF-TG) ENSMUSG00000010362	false
10502	TF-TG	ENSMUSG00000036036 (TF-TG) ENSMUSG00000010021	false
20741	TF-TG	ENSMUSG00000022346 (TF-TG) ENSMUSG00000010825	false
6405	TF-TG	ENSMUSG00000032035 (TF-TG) ENSMUSG00000042804	false
20740	TF-TG	ENSMUSG00000022346 (TF-TG) ENSMUSG00000010830	false
4356	TF-TG	ENSMUSG00000068154 (TF-TG) ENSMUSG00000042462	false
6404	TF-TG	ENSMUSG00000032035 (TF-TG) ENSMUSG00000042842	false
10500	TF-TG	ENSMUSG00000036036 (TF-TG) ENSMUSG00000010362	false
10498	TF-TG	ENSMUSG00000036036 (TF-TG) ENSMUSG00000010825	false
10497	TF-TG	ENSMUSG00000036036 (TF-TG) ENSMUSG00000010830	false
20735	TF-TG	ENSMUSG00000022346 (TF-TG) ENSMUSG00000013523	false
4351	TF-TG	ENSMUSG00000068154 (TF-TG) ENSMUSG00000043015	false
6399	TF-TG	ENSMUSG00000032035 (TF-TG) ENSMUSG00000043015	false
20734	TF-TG	ENSMUSG00000022346 (TF-TG) ENSMUSG00000013698	false
20733	TF-TG	ENSMUSG00000022346 (TF-TG) ENSMUSG00000013846	false
10492	TF-TG	ENSMUSG00000036036 (TF-TG) ENSMUSG00000013523	false
20731	TF-TG	ENSMUSG00000022346 (TF-TG) ENSMUSG00000014164	false
6395	TF-TG	ENSMUSG00000032035 (TF-TG) ENSMUSG00000043154	false
10491	TF-TG	ENSMUSG00000036036 (TF-TG) ENSMUSG00000013846	false
20728	TF-TG	ENSMUSG00000022346 (TF-TG) ENSMUSG00000014786	false
4344	TF-TG	ENSMUSG00000068154 (TF-TG) ENSMUSG00000044005	false
10487	TF-TG	ENSMUSG00000036036 (TF-TG) ENSMUSG00000015468	false
4342	TF-TG	ENSMUSG00000068154 (TF-TG) ENSMUSG00000044626	false
4341	TF-TG	ENSMUSG00000068154 (TF-TG) ENSMUSG00000045007	false
6389	TF-TG	ENSMUSG00000032035 (TF-TG) ENSMUSG00000044005	false
20724	TF-TG	ENSMUSG00000022346 (TF-TG) ENSMUSG00000015468	false
10483	TF-TG	ENSMUSG00000036036 (TF-TG) ENSMUSG00000016200	false
4337	TF-TG	ENSMUSG00000068154 (TF-TG) ENSMUSG00000045790	false
20719	TF-TG	ENSMUSG00000022346 (TF-TG) ENSMUSG00000016200	false
10476	TF-TG	ENSMUSG00000036036 (TF-TG) ENSMUSG00000017607	false
6377	TF-TG	ENSMUSG00000032035 (TF-TG) ENSMUSG00000044626	false
6376	TF-TG	ENSMUSG00000032035 (TF-TG) ENSMUSG00000044646	false
10469	TF-TG	ENSMUSG00000036036 (TF-TG) ENSMUSG00000018554	false
20708	TF-TG	ENSMUSG00000022346 (TF-TG) ENSMUSG00000017493	false
20707	TF-TG	ENSMUSG00000022346 (TF-TG) ENSMUSG00000017499	false
20705	TF-TG	ENSMUSG00000022346 (TF-TG) ENSMUSG00000017607	false
6368	TF-TG	ENSMUSG00000032035 (TF-TG) ENSMUSG00000045007	false
4318	TF-TG	ENSMUSG00000068154 (TF-TG) ENSMUSG00000047963	false
20701	TF-TG	ENSMUSG00000022346 (TF-TG) ENSMUSG00000017716	false
10461	TF-TG	ENSMUSG00000036036 (TF-TG) ENSMUSG00000019235	false
4316	TF-TG	ENSMUSG00000068154 (TF-TG) ENSMUSG00000048970	false
4315	TF-TG	ENSMUSG00000068154 (TF-TG) ENSMUSG00000049154	false
10459	TF-TG	ENSMUSG00000036036 (TF-TG) ENSMUSG00000019303	false
6361	TF-TG	ENSMUSG00000032035 (TF-TG) ENSMUSG00000045518	false
10456	TF-TG	ENSMUSG00000036036 (TF-TG) ENSMUSG00000019775	false
6359	TF-TG	ENSMUSG00000032035 (TF-TG) ENSMUSG00000045751	false
10455	TF-TG	ENSMUSG00000036036 (TF-TG) ENSMUSG00000019796	false
4309	TF-TG	ENSMUSG00000068154 (TF-TG) ENSMUSG00000050824	false
20691	TF-TG	ENSMUSG00000022346 (TF-TG) ENSMUSG00000018554	false
10450	TF-TG	ENSMUSG00000036036 (TF-TG) ENSMUSG00000019945	false
20689	TF-TG	ENSMUSG00000022346 (TF-TG) ENSMUSG00000018672	false
4305	TF-TG	ENSMUSG00000068154 (TF-TG) ENSMUSG00000051314	false
4303	TF-TG	ENSMUSG00000068154 (TF-TG) ENSMUSG00000052117	false
6351	TF-TG	ENSMUSG00000032035 (TF-TG) ENSMUSG00000046204	false
6350	TF-TG	ENSMUSG00000032035 (TF-TG) ENSMUSG00000046223	false
8396	TF-TG	ENSMUSG00000024912 (TF-TG) ENSMUSG00000000555	false
4299	TF-TG	ENSMUSG00000068154 (TF-TG) ENSMUSG00000053414	false
6347	TF-TG	ENSMUSG00000032035 (TF-TG) ENSMUSG00000046410	false
20680	TF-TG	ENSMUSG00000022346 (TF-TG) ENSMUSG00000019235	false
4296	TF-TG	ENSMUSG00000068154 (TF-TG) ENSMUSG00000053765	false
8392	TF-TG	ENSMUSG00000024912 (TF-TG) ENSMUSG00000004951	false
4295	TF-TG	ENSMUSG00000068154 (TF-TG) ENSMUSG00000053963	false
8391	TF-TG	ENSMUSG00000024912 (TF-TG) ENSMUSG00000005267	false
20678	TF-TG	ENSMUSG00000022346 (TF-TG) ENSMUSG00000019303	false
20674	TF-TG	ENSMUSG00000022346 (TF-TG) ENSMUSG00000019775	false
10434	TF-TG	ENSMUSG00000036036 (TF-TG) ENSMUSG00000020226	false
20673	TF-TG	ENSMUSG00000022346 (TF-TG) ENSMUSG00000019796	false
8385	TF-TG	ENSMUSG00000024912 (TF-TG) ENSMUSG00000010021	false
6337	TF-TG	ENSMUSG00000032035 (TF-TG) ENSMUSG00000046841	false
8383	TF-TG	ENSMUSG00000024912 (TF-TG) ENSMUSG00000013846	false
6334	TF-TG	ENSMUSG00000032035 (TF-TG) ENSMUSG00000047109	false
8381	TF-TG	ENSMUSG00000024912 (TF-TG) ENSMUSG00000014786	false
4284	TF-TG	ENSMUSG00000068154 (TF-TG) ENSMUSG00000055567	false
6331	TF-TG	ENSMUSG00000032035 (TF-TG) ENSMUSG00000047181	false
4282	TF-TG	ENSMUSG00000068154 (TF-TG) ENSMUSG00000055805	false
10426	TF-TG	ENSMUSG00000036036 (TF-TG) ENSMUSG00000020571	false
20665	TF-TG	ENSMUSG00000022346 (TF-TG) ENSMUSG00000019945	false
8377	TF-TG	ENSMUSG00000024912 (TF-TG) ENSMUSG00000017716	false
4280	TF-TG	ENSMUSG00000068154 (TF-TG) ENSMUSG00000056050	false
8375	TF-TG	ENSMUSG00000024912 (TF-TG) ENSMUSG00000019775	false
10422	TF-TG	ENSMUSG00000036036 (TF-TG) ENSMUSG00000020649	false
8373	TF-TG	ENSMUSG00000024912 (TF-TG) ENSMUSG00000020649	false
20660	TF-TG	ENSMUSG00000022346 (TF-TG) ENSMUSG00000019992	false
14513	TF-TG	ENSMUSG00000026398 (TF-TG) ENSMUSG00000000214	false
14512	TF-TG	ENSMUSG00000026398 (TF-TG) ENSMUSG00000000594	false
4272	TF-TG	ENSMUSG00000068154 (TF-TG) ENSMUSG00000058070	false
8368	TF-TG	ENSMUSG00000024912 (TF-TG) ENSMUSG00000022003	false
8367	TF-TG	ENSMUSG00000024912 (TF-TG) ENSMUSG00000022148	false
14510	TF-TG	ENSMUSG00000026398 (TF-TG) ENSMUSG00000003355	false
10414	TF-TG	ENSMUSG00000036036 (TF-TG) ENSMUSG00000020900	false
10413	TF-TG	ENSMUSG00000036036 (TF-TG) ENSMUSG00000020901	false
14508	TF-TG	ENSMUSG00000026398 (TF-TG) ENSMUSG00000004709	false
10412	TF-TG	ENSMUSG00000036036 (TF-TG) ENSMUSG00000021061	false
20651	TF-TG	ENSMUSG00000022346 (TF-TG) ENSMUSG00000020151	false
14507	TF-TG	ENSMUSG00000026398 (TF-TG) ENSMUSG00000004951	false
10411	TF-TG	ENSMUSG00000036036 (TF-TG) ENSMUSG00000021136	false
4266	TF-TG	ENSMUSG00000068154 (TF-TG) ENSMUSG00000059713	false
6312	TF-TG	ENSMUSG00000032035 (TF-TG) ENSMUSG00000047878	false
4263	TF-TG	ENSMUSG00000068154 (TF-TG) ENSMUSG00000061607	false
8359	TF-TG	ENSMUSG00000024912 (TF-TG) ENSMUSG00000023886	false
6311	TF-TG	ENSMUSG00000032035 (TF-TG) ENSMUSG00000047963	false
8358	TF-TG	ENSMUSG00000024912 (TF-TG) ENSMUSG00000024512	false
8357	TF-TG	ENSMUSG00000024912 (TF-TG) ENSMUSG00000024516	false
20644	TF-TG	ENSMUSG00000022346 (TF-TG) ENSMUSG00000020226	false
4259	TF-TG	ENSMUSG00000068154 (TF-TG) ENSMUSG00000062760	false
10403	TF-TG	ENSMUSG00000036036 (TF-TG) ENSMUSG00000021396	false
6302	TF-TG	ENSMUSG00000032035 (TF-TG) ENSMUSG00000048349	false
10398	TF-TG	ENSMUSG00000036036 (TF-TG) ENSMUSG00000021572	false
8349	TF-TG	ENSMUSG00000024912 (TF-TG) ENSMUSG00000025064	false
4252	TF-TG	ENSMUSG00000068154 (TF-TG) ENSMUSG00000068196	false
8348	TF-TG	ENSMUSG00000024912 (TF-TG) ENSMUSG00000025075	false
4251	TF-TG	ENSMUSG00000068154 (TF-TG) ENSMUSG00000068735	false
4250	TF-TG	ENSMUSG00000068154 (TF-TG) ENSMUSG00000069227	false
8346	TF-TG	ENSMUSG00000024912 (TF-TG) ENSMUSG00000025742	false
14489	TF-TG	ENSMUSG00000026398 (TF-TG) ENSMUSG00000018672	false
10393	TF-TG	ENSMUSG00000036036 (TF-TG) ENSMUSG00000021831	false
20632	TF-TG	ENSMUSG00000022346 (TF-TG) ENSMUSG00000020462	false
10392	TF-TG	ENSMUSG00000036036 (TF-TG) ENSMUSG00000021838	false
14487	TF-TG	ENSMUSG00000026398 (TF-TG) ENSMUSG00000019303	false
10391	TF-TG	ENSMUSG00000036036 (TF-TG) ENSMUSG00000021846	false
20630	TF-TG	ENSMUSG00000022346 (TF-TG) ENSMUSG00000020471	false
8342	TF-TG	ENSMUSG00000024912 (TF-TG) ENSMUSG00000026303	false
6294	TF-TG	ENSMUSG00000032035 (TF-TG) ENSMUSG00000048970	false
10390	TF-TG	ENSMUSG00000036036 (TF-TG) ENSMUSG00000021876	false
4245	TF-TG	ENSMUSG00000068154 (TF-TG) ENSMUSG00000070498	false
20628	TF-TG	ENSMUSG00000022346 (TF-TG) ENSMUSG00000020571	false
14484	TF-TG	ENSMUSG00000026398 (TF-TG) ENSMUSG00000019945	false
10388	TF-TG	ENSMUSG00000036036 (TF-TG) ENSMUSG00000021986	false
14483	TF-TG	ENSMUSG00000026398 (TF-TG) ENSMUSG00000019992	false
4243	TF-TG	ENSMUSG00000068154 (TF-TG) ENSMUSG00000070867	false
8339	TF-TG	ENSMUSG00000024912 (TF-TG) ENSMUSG00000026646	false
6291	TF-TG	ENSMUSG00000032035 (TF-TG) ENSMUSG00000049154	false
10387	TF-TG	ENSMUSG00000036036 (TF-TG) ENSMUSG00000022003	false
8338	TF-TG	ENSMUSG00000024912 (TF-TG) ENSMUSG00000026683	false
6290	TF-TG	ENSMUSG00000032035 (TF-TG) ENSMUSG00000049288	false
10385	TF-TG	ENSMUSG00000036036 (TF-TG) ENSMUSG00000022021	false
4240	TF-TG	ENSMUSG00000068154 (TF-TG) ENSMUSG00000072115	false
4239	TF-TG	ENSMUSG00000068154 (TF-TG) ENSMUSG00000072235	false
20620	TF-TG	ENSMUSG00000022346 (TF-TG) ENSMUSG00000020649	false
10380	TF-TG	ENSMUSG00000036036 (TF-TG) ENSMUSG00000022148	false
14474	TF-TG	ENSMUSG00000026398 (TF-TG) ENSMUSG00000020901	false
10378	TF-TG	ENSMUSG00000036036 (TF-TG) ENSMUSG00000022211	false
14473	TF-TG	ENSMUSG00000026398 (TF-TG) ENSMUSG00000021136	false
4233	TF-TG	ENSMUSG00000068154 (TF-TG) ENSMUSG00000074892	false
10376	TF-TG	ENSMUSG00000036036 (TF-TG) ENSMUSG00000022346	false
8326	TF-TG	ENSMUSG00000024912 (TF-TG) ENSMUSG00000028555	false
4229	TF-TG	ENSMUSG00000068154 (TF-TG) ENSMUSG00000078773	false
20612	TF-TG	ENSMUSG00000022346 (TF-TG) ENSMUSG00000020788	false
14468	TF-TG	ENSMUSG00000026398 (TF-TG) ENSMUSG00000021831	false
8324	TF-TG	ENSMUSG00000024912 (TF-TG) ENSMUSG00000028602	false
10372	TF-TG	ENSMUSG00000036036 (TF-TG) ENSMUSG00000022489	false
14467	TF-TG	ENSMUSG00000026398 (TF-TG) ENSMUSG00000021876	false
4227	TF-TG	ENSMUSG00000068154 (TF-TG) ENSMUSG00000079038	false
6275	TF-TG	ENSMUSG00000032035 (TF-TG) ENSMUSG00000050335	false
20609	TF-TG	ENSMUSG00000022346 (TF-TG) ENSMUSG00000020846	false
4225	TF-TG	ENSMUSG00000068154 (TF-TG) ENSMUSG00000089789	false
14464	TF-TG	ENSMUSG00000026398 (TF-TG) ENSMUSG00000022211	false
14463	TF-TG	ENSMUSG00000026398 (TF-TG) ENSMUSG00000022253	false
8318	TF-TG	ENSMUSG00000024912 (TF-TG) ENSMUSG00000030329	false
4221	TF-TG	ENSMUSG00000068154 (TF-TG) ENSMUSG00000092486	false
20604	TF-TG	ENSMUSG00000022346 (TF-TG) ENSMUSG00000020900	false
20603	TF-TG	ENSMUSG00000022346 (TF-TG) ENSMUSG00000020901	false
14459	TF-TG	ENSMUSG00000026398 (TF-TG) ENSMUSG00000022840	false
4219	TF-TG	ENSMUSG00000068154 (TF-TG) ENSMUSG00000094928	false
8315	TF-TG	ENSMUSG00000024912 (TF-TG) ENSMUSG00000031757	false
10363	TF-TG	ENSMUSG00000036036 (TF-TG) ENSMUSG00000022762	false
4218	TF-TG	ENSMUSG00000068154 (TF-TG) ENSMUSG00000096847	false
10362	TF-TG	ENSMUSG00000036036 (TF-TG) ENSMUSG00000022769	false
8313	TF-TG	ENSMUSG00000024912 (TF-TG) ENSMUSG00000031788	false
6265	TF-TG	ENSMUSG00000032035 (TF-TG) ENSMUSG00000050824	false
10361	TF-TG	ENSMUSG00000036036 (TF-TG) ENSMUSG00000022773	false
10360	TF-TG	ENSMUSG00000036036 (TF-TG) ENSMUSG00000022840	false
20599	TF-TG	ENSMUSG00000022346 (TF-TG) ENSMUSG00000021061	false
8311	TF-TG	ENSMUSG00000024912 (TF-TG) ENSMUSG00000032035	false
10357	TF-TG	ENSMUSG00000036036 (TF-TG) ENSMUSG00000022912	false
20596	TF-TG	ENSMUSG00000022346 (TF-TG) ENSMUSG00000021136	false
10355	TF-TG	ENSMUSG00000036036 (TF-TG) ENSMUSG00000022945	false
8304	TF-TG	ENSMUSG00000024912 (TF-TG) ENSMUSG00000033825	false
6256	TF-TG	ENSMUSG00000032035 (TF-TG) ENSMUSG00000051251	false
14447	TF-TG	ENSMUSG00000026398 (TF-TG) ENSMUSG00000024891	false
6255	TF-TG	ENSMUSG00000032035 (TF-TG) ENSMUSG00000051314	false
8302	TF-TG	ENSMUSG00000024912 (TF-TG) ENSMUSG00000034579	false
8300	TF-TG	ENSMUSG00000024912 (TF-TG) ENSMUSG00000034656	false
6252	TF-TG	ENSMUSG00000032035 (TF-TG) ENSMUSG00000051457	false
10348	TF-TG	ENSMUSG00000036036 (TF-TG) ENSMUSG00000023066	false
10346	TF-TG	ENSMUSG00000036036 (TF-TG) ENSMUSG00000023247	false
20584	TF-TG	ENSMUSG00000022346 (TF-TG) ENSMUSG00000021391	false
14440	TF-TG	ENSMUSG00000026398 (TF-TG) ENSMUSG00000025969	false
20583	TF-TG	ENSMUSG00000022346 (TF-TG) ENSMUSG00000021396	false
10343	TF-TG	ENSMUSG00000036036 (TF-TG) ENSMUSG00000023886	false
8294	TF-TG	ENSMUSG00000024912 (TF-TG) ENSMUSG00000036777	false
6245	TF-TG	ENSMUSG00000032035 (TF-TG) ENSMUSG00000052117	false
14436	TF-TG	ENSMUSG00000026398 (TF-TG) ENSMUSG00000026380	false
8291	TF-TG	ENSMUSG00000024912 (TF-TG) ENSMUSG00000037820	false
20577	TF-TG	ENSMUSG00000022346 (TF-TG) ENSMUSG00000021572	false
8289	TF-TG	ENSMUSG00000024912 (TF-TG) ENSMUSG00000038241	false
14432	TF-TG	ENSMUSG00000026398 (TF-TG) ENSMUSG00000026669	false
6240	TF-TG	ENSMUSG00000032035 (TF-TG) ENSMUSG00000052384	false
10336	TF-TG	ENSMUSG00000036036 (TF-TG) ENSMUSG00000024175	false
10335	TF-TG	ENSMUSG00000036036 (TF-TG) ENSMUSG00000024193	false
8285	TF-TG	ENSMUSG00000024912 (TF-TG) ENSMUSG00000038903	false
6237	TF-TG	ENSMUSG00000032035 (TF-TG) ENSMUSG00000052921	false
10332	TF-TG	ENSMUSG00000036036 (TF-TG) ENSMUSG00000024299	false
14427	TF-TG	ENSMUSG00000026398 (TF-TG) ENSMUSG00000027075	false
14426	TF-TG	ENSMUSG00000026398 (TF-TG) ENSMUSG00000027230	false
8282	TF-TG	ENSMUSG00000024912 (TF-TG) ENSMUSG00000039145	false
8280	TF-TG	ENSMUSG00000024912 (TF-TG) ENSMUSG00000040433	false
20567	TF-TG	ENSMUSG00000022346 (TF-TG) ENSMUSG00000021831	false
14423	TF-TG	ENSMUSG00000026398 (TF-TG) ENSMUSG00000027931	false
10327	TF-TG	ENSMUSG00000036036 (TF-TG) ENSMUSG00000024516	false
6230	TF-TG	ENSMUSG00000032035 (TF-TG) ENSMUSG00000053414	false
20565	TF-TG	ENSMUSG00000022346 (TF-TG) ENSMUSG00000021838	false
10325	TF-TG	ENSMUSG00000036036 (TF-TG) ENSMUSG00000024533	false
20564	TF-TG	ENSMUSG00000022346 (TF-TG) ENSMUSG00000021846	false
14420	TF-TG	ENSMUSG00000026398 (TF-TG) ENSMUSG00000028415	false
6228	TF-TG	ENSMUSG00000032035 (TF-TG) ENSMUSG00000053580	false
20563	TF-TG	ENSMUSG00000022346 (TF-TG) ENSMUSG00000021876	false
14418	TF-TG	ENSMUSG00000026398 (TF-TG) ENSMUSG00000028532	false
20561	TF-TG	ENSMUSG00000022346 (TF-TG) ENSMUSG00000021986	false
6225	TF-TG	ENSMUSG00000032035 (TF-TG) ENSMUSG00000053765	false
14416	TF-TG	ENSMUSG00000026398 (TF-TG) ENSMUSG00000028763	false
8272	TF-TG	ENSMUSG00000024912 (TF-TG) ENSMUSG00000042842	false
20559	TF-TG	ENSMUSG00000022346 (TF-TG) ENSMUSG00000022003	false
14415	TF-TG	ENSMUSG00000026398 (TF-TG) ENSMUSG00000028825	false
6221	TF-TG	ENSMUSG00000032035 (TF-TG) ENSMUSG00000053963	false
8268	TF-TG	ENSMUSG00000024912 (TF-TG) ENSMUSG00000044626	false
10316	TF-TG	ENSMUSG00000036036 (TF-TG) ENSMUSG00000024777	false
14411	TF-TG	ENSMUSG00000026398 (TF-TG) ENSMUSG00000028909	false
20553	TF-TG	ENSMUSG00000022346 (TF-TG) ENSMUSG00000022148	false
8265	TF-TG	ENSMUSG00000024912 (TF-TG) ENSMUSG00000046223	false
10313	TF-TG	ENSMUSG00000036036 (TF-TG) ENSMUSG00000024891	false
14408	TF-TG	ENSMUSG00000026398 (TF-TG) ENSMUSG00000029343	false
8263	TF-TG	ENSMUSG00000024912 (TF-TG) ENSMUSG00000047963	false
20550	TF-TG	ENSMUSG00000022346 (TF-TG) ENSMUSG00000022211	false
6214	TF-TG	ENSMUSG00000032035 (TF-TG) ENSMUSG00000054555	false
20549	TF-TG	ENSMUSG00000022346 (TF-TG) ENSMUSG00000022253	false
6213	TF-TG	ENSMUSG00000032035 (TF-TG) ENSMUSG00000054582	false
10309	TF-TG	ENSMUSG00000036036 (TF-TG) ENSMUSG00000024912	false
6211	TF-TG	ENSMUSG00000032035 (TF-TG) ENSMUSG00000054630	false
10306	TF-TG	ENSMUSG00000036036 (TF-TG) ENSMUSG00000024989	false
14400	TF-TG	ENSMUSG00000026398 (TF-TG) ENSMUSG00000030353	false
10302	TF-TG	ENSMUSG00000036036 (TF-TG) ENSMUSG00000025064	false
14397	TF-TG	ENSMUSG00000026398 (TF-TG) ENSMUSG00000030659	false
20540	TF-TG	ENSMUSG00000022346 (TF-TG) ENSMUSG00000022489	false
8252	TF-TG	ENSMUSG00000024912 (TF-TG) ENSMUSG00000052921	false
14393	TF-TG	ENSMUSG00000026398 (TF-TG) ENSMUSG00000031629	false
14392	TF-TG	ENSMUSG00000026398 (TF-TG) ENSMUSG00000031668	false
14391	TF-TG	ENSMUSG00000026398 (TF-TG) ENSMUSG00000031730	false
6199	TF-TG	ENSMUSG00000032035 (TF-TG) ENSMUSG00000055567	false
8245	TF-TG	ENSMUSG00000024912 (TF-TG) ENSMUSG00000062760	false
6195	TF-TG	ENSMUSG00000032035 (TF-TG) ENSMUSG00000055805	false
14386	TF-TG	ENSMUSG00000026398 (TF-TG) ENSMUSG00000031981	false
20529	TF-TG	ENSMUSG00000022346 (TF-TG) ENSMUSG00000022762	false
8241	TF-TG	ENSMUSG00000024912 (TF-TG) ENSMUSG00000064090	false
10289	TF-TG	ENSMUSG00000036036 (TF-TG) ENSMUSG00000025608	false
20528	TF-TG	ENSMUSG00000022346 (TF-TG) ENSMUSG00000022769	false
14384	TF-TG	ENSMUSG00000026398 (TF-TG) ENSMUSG00000032092	false
20527	TF-TG	ENSMUSG00000022346 (TF-TG) ENSMUSG00000022773	false
8239	TF-TG	ENSMUSG00000024912 (TF-TG) ENSMUSG00000069227	false
20525	TF-TG	ENSMUSG00000022346 (TF-TG) ENSMUSG00000022840	false
8237	TF-TG	ENSMUSG00000024912 (TF-TG) ENSMUSG00000072849	false
10285	TF-TG	ENSMUSG00000036036 (TF-TG) ENSMUSG00000025876	false
10284	TF-TG	ENSMUSG00000036036 (TF-TG) ENSMUSG00000025969	false
14379	TF-TG	ENSMUSG00000026398 (TF-TG) ENSMUSG00000033032	false
8235	TF-TG	ENSMUSG00000024912 (TF-TG) ENSMUSG00000074183	false
20521	TF-TG	ENSMUSG00000022346 (TF-TG) ENSMUSG00000022881	false
8233	TF-TG	ENSMUSG00000024912 (TF-TG) ENSMUSG00000078773	false
6185	TF-TG	ENSMUSG00000032035 (TF-TG) ENSMUSG00000056531	false
6184	TF-TG	ENSMUSG00000032035 (TF-TG) ENSMUSG00000056602	false
20519	TF-TG	ENSMUSG00000022346 (TF-TG) ENSMUSG00000022912	false
8230	TF-lincRNA	ENSMUSG00000024912 (TF-lincRNA) ENSMUSG00000085183	false
20517	TF-TG	ENSMUSG00000022346 (TF-TG) ENSMUSG00000022945	false
6181	TF-TG	ENSMUSG00000032035 (TF-TG) ENSMUSG00000056888	false
10277	TF-TG	ENSMUSG00000036036 (TF-TG) ENSMUSG00000026303	false
6180	TF-TG	ENSMUSG00000032035 (TF-TG) ENSMUSG00000057069	false
6178	TF-TG	ENSMUSG00000032035 (TF-TG) ENSMUSG00000057137	false
14368	TF-TG	ENSMUSG00000026398 (TF-TG) ENSMUSG00000035683	false
10271	TF-TG	ENSMUSG00000036036 (TF-TG) ENSMUSG00000026398	false
14366	TF-TG	ENSMUSG00000026398 (TF-TG) ENSMUSG00000035849	false
20508	TF-TG	ENSMUSG00000022346 (TF-TG) ENSMUSG00000023066	false
6169	TF-TG	ENSMUSG00000032035 (TF-TG) ENSMUSG00000057897	false
14360	TF-TG	ENSMUSG00000026398 (TF-TG) ENSMUSG00000036887	false
10264	TF-TG	ENSMUSG00000036036 (TF-TG) ENSMUSG00000026483	false
20503	TF-TG	ENSMUSG00000022346 (TF-TG) ENSMUSG00000023247	false
6167	TF-TG	ENSMUSG00000032035 (TF-TG) ENSMUSG00000058006	false
20502	TF-TG	ENSMUSG00000022346 (TF-TG) ENSMUSG00000023272	false
6166	TF-TG	ENSMUSG00000032035 (TF-TG) ENSMUSG00000058070	false
14356	TF-TG	ENSMUSG00000026398 (TF-TG) ENSMUSG00000037580	false
10258	TF-TG	ENSMUSG00000036036 (TF-TG) ENSMUSG00000026669	false
20497	TF-TG	ENSMUSG00000022346 (TF-TG) ENSMUSG00000023886	false
14353	TF-TG	ENSMUSG00000026398 (TF-TG) ENSMUSG00000037643	false
10257	TF-TG	ENSMUSG00000036036 (TF-TG) ENSMUSG00000026683	false
14350	TF-TG	ENSMUSG00000026398 (TF-TG) ENSMUSG00000038903	false
14348	TF-TG	ENSMUSG00000026398 (TF-TG) ENSMUSG00000039115	false
14347	TF-TG	ENSMUSG00000026398 (TF-TG) ENSMUSG00000039234	false
14346	TF-TG	ENSMUSG00000026398 (TF-TG) ENSMUSG00000039323	false
8202	TF-TG	ENSMUSG00000030353 (TF-TG) ENSMUSG00000000125	false
14345	TF-TG	ENSMUSG00000026398 (TF-TG) ENSMUSG00000039395	false
6153	TF-TG	ENSMUSG00000032035 (TF-TG) ENSMUSG00000059493	false
14344	TF-TG	ENSMUSG00000026398 (TF-TG) ENSMUSG00000039831	false
8199	TF-TG	ENSMUSG00000030353 (TF-TG) ENSMUSG00000000214	false
6151	TF-TG	ENSMUSG00000032035 (TF-TG) ENSMUSG00000059713	false
8198	TF-TG	ENSMUSG00000030353 (TF-TG) ENSMUSG00000000253	false
14341	TF-TG	ENSMUSG00000026398 (TF-TG) ENSMUSG00000040433	false
6149	TF-TG	ENSMUSG00000032035 (TF-TG) ENSMUSG00000059939	false
6148	TF-TG	ENSMUSG00000032035 (TF-TG) ENSMUSG00000059991	false
8195	TF-TG	ENSMUSG00000030353 (TF-TG) ENSMUSG00000000555	false
10243	TF-TG	ENSMUSG00000036036 (TF-TG) ENSMUSG00000027075	false
20482	TF-TG	ENSMUSG00000022346 (TF-TG) ENSMUSG00000024175	false
8193	TF-TG	ENSMUSG00000030353 (TF-TG) ENSMUSG00000000594	false
10241	TF-TG	ENSMUSG00000036036 (TF-TG) ENSMUSG00000027230	false
20480	TF-TG	ENSMUSG00000022346 (TF-TG) ENSMUSG00000024193	false
6143	TF-TG	ENSMUSG00000032035 (TF-TG) ENSMUSG00000060550	false
10239	TF-TG	ENSMUSG00000036036 (TF-TG) ENSMUSG00000027273	false
14333	TF-TG	ENSMUSG00000026398 (TF-TG) ENSMUSG00000041268	false
8189	TF-TG	ENSMUSG00000030353 (TF-TG) ENSMUSG00000001525	false
6141	TF-TG	ENSMUSG00000032035 (TF-TG) ENSMUSG00000060671	false
20476	TF-TG	ENSMUSG00000022346 (TF-TG) ENSMUSG00000024299	false
14332	TF-TG	ENSMUSG00000026398 (TF-TG) ENSMUSG00000041351	false
8188	TF-TG	ENSMUSG00000030353 (TF-TG) ENSMUSG00000001761	false
8184	TF-TG	ENSMUSG00000030353 (TF-TG) ENSMUSG00000001985	false
20471	TF-TG	ENSMUSG00000022346 (TF-TG) ENSMUSG00000024366	false
6134	TF-TG	ENSMUSG00000032035 (TF-TG) ENSMUSG00000061607	false
10230	TF-TG	ENSMUSG00000036036 (TF-TG) ENSMUSG00000027533	false
8181	TF-TG	ENSMUSG00000030353 (TF-TG) ENSMUSG00000002835	false
20468	TF-TG	ENSMUSG00000022346 (TF-TG) ENSMUSG00000024423	false
8180	TF-TG	ENSMUSG00000030353 (TF-TG) ENSMUSG00000002870	false
14322	TF-TG	ENSMUSG00000026398 (TF-TG) ENSMUSG00000044005	false
10226	TF-TG	ENSMUSG00000036036 (TF-TG) ENSMUSG00000027611	false
20464	TF-TG	ENSMUSG00000022346 (TF-TG) ENSMUSG00000024512	false
20463	TF-TG	ENSMUSG00000022346 (TF-TG) ENSMUSG00000024516	false
14319	TF-TG	ENSMUSG00000026398 (TF-TG) ENSMUSG00000044646	false
6127	TF-TG	ENSMUSG00000032035 (TF-TG) ENSMUSG00000062210	false
10223	TF-TG	ENSMUSG00000036036 (TF-TG) ENSMUSG00000027661	false
8174	TF-TG	ENSMUSG00000030353 (TF-TG) ENSMUSG00000003283	false
6126	TF-TG	ENSMUSG00000032035 (TF-TG) ENSMUSG00000062248	false
20461	TF-TG	ENSMUSG00000022346 (TF-TG) ENSMUSG00000024533	false
8173	TF-TG	ENSMUSG00000030353 (TF-TG) ENSMUSG00000003355	false
8172	TF-TG	ENSMUSG00000030353 (TF-TG) ENSMUSG00000003411	false
10220	TF-TG	ENSMUSG00000036036 (TF-TG) ENSMUSG00000027797	false
8171	TF-TG	ENSMUSG00000030353 (TF-TG) ENSMUSG00000003436	false
8170	TF-TG	ENSMUSG00000030353 (TF-TG) ENSMUSG00000003469	false
14313	TF-TG	ENSMUSG00000026398 (TF-TG) ENSMUSG00000046223	false
8168	TF-TG	ENSMUSG00000030353 (TF-TG) ENSMUSG00000003545	false
6120	TF-TG	ENSMUSG00000032035 (TF-TG) ENSMUSG00000062760	false
8167	TF-TG	ENSMUSG00000030353 (TF-TG) ENSMUSG00000003992	false
20453	TF-TG	ENSMUSG00000022346 (TF-TG) ENSMUSG00000024613	false
8163	TF-TG	ENSMUSG00000030353 (TF-TG) ENSMUSG00000004709	false
14306	TF-TG	ENSMUSG00000026398 (TF-TG) ENSMUSG00000047109	false
8162	TF-TG	ENSMUSG00000030353 (TF-TG) ENSMUSG00000004951	false
6114	TF-TG	ENSMUSG00000032035 (TF-TG) ENSMUSG00000063810	false
6113	TF-TG	ENSMUSG00000032035 (TF-TG) ENSMUSG00000064090	false
10209	TF-TG	ENSMUSG00000036036 (TF-TG) ENSMUSG00000028403	false
10208	TF-TG	ENSMUSG00000036036 (TF-TG) ENSMUSG00000028415	false
20447	TF-TG	ENSMUSG00000022346 (TF-TG) ENSMUSG00000024777	false
10206	TF-TG	ENSMUSG00000036036 (TF-TG) ENSMUSG00000028532	false
14301	TF-TG	ENSMUSG00000026398 (TF-TG) ENSMUSG00000049154	false
14298	TF-TG	ENSMUSG00000026398 (TF-TG) ENSMUSG00000050335	false
8154	TF-TG	ENSMUSG00000030353 (TF-TG) ENSMUSG00000006386	false
10202	TF-TG	ENSMUSG00000036036 (TF-TG) ENSMUSG00000028634	false
20441	TF-TG	ENSMUSG00000022346 (TF-TG) ENSMUSG00000024891	false
6104	TF-TG	ENSMUSG00000032035 (TF-TG) ENSMUSG00000064267	false
10200	TF-TG	ENSMUSG00000036036 (TF-TG) ENSMUSG00000028693	false
14295	TF-TG	ENSMUSG00000026398 (TF-TG) ENSMUSG00000052117	false
10199	TF-TG	ENSMUSG00000036036 (TF-TG) ENSMUSG00000028699	false
20437	TF-TG	ENSMUSG00000022346 (TF-TG) ENSMUSG00000024912	false
6101	TF-TG	ENSMUSG00000032035 (TF-TG) ENSMUSG00000065952	false
10196	TF-TG	ENSMUSG00000036036 (TF-TG) ENSMUSG00000028763	false
8147	TF-TG	ENSMUSG00000030353 (TF-TG) ENSMUSG00000007989	false
14290	TF-TG	ENSMUSG00000026398 (TF-TG) ENSMUSG00000053963	false
20433	TF-TG	ENSMUSG00000022346 (TF-TG) ENSMUSG00000024989	false
10193	TF-TG	ENSMUSG00000036036 (TF-TG) ENSMUSG00000028825	false
20432	TF-TG	ENSMUSG00000022346 (TF-TG) ENSMUSG00000025001	false
14288	TF-TG	ENSMUSG00000026398 (TF-TG) ENSMUSG00000054630	false
8144	TF-TG	ENSMUSG00000030353 (TF-TG) ENSMUSG00000009108	false
8143	TF-TG	ENSMUSG00000030353 (TF-TG) ENSMUSG00000010021	false
14286	TF-TG	ENSMUSG00000026398 (TF-TG) ENSMUSG00000055805	false
8142	TF-TG	ENSMUSG00000030353 (TF-TG) ENSMUSG00000010362	false
14285	TF-TG	ENSMUSG00000026398 (TF-TG) ENSMUSG00000056602	false
8141	TF-TG	ENSMUSG00000030353 (TF-TG) ENSMUSG00000010825	false
10189	TF-TG	ENSMUSG00000036036 (TF-TG) ENSMUSG00000028909	false
14284	TF-TG	ENSMUSG00000026398 (TF-TG) ENSMUSG00000057069	false
6092	TF-TG	ENSMUSG00000032035 (TF-TG) ENSMUSG00000067813	false
10187	TF-TG	ENSMUSG00000036036 (TF-TG) ENSMUSG00000028927	false
20426	TF-TG	ENSMUSG00000022346 (TF-TG) ENSMUSG00000025064	false
10186	TF-TG	ENSMUSG00000036036 (TF-TG) ENSMUSG00000028949	false
20425	TF-TG	ENSMUSG00000022346 (TF-TG) ENSMUSG00000025075	false
6089	TF-TG	ENSMUSG00000032035 (TF-TG) ENSMUSG00000068154	false
8136	TF-TG	ENSMUSG00000030353 (TF-TG) ENSMUSG00000013846	false
6088	TF-TG	ENSMUSG00000032035 (TF-TG) ENSMUSG00000068196	false
8135	TF-TG	ENSMUSG00000030353 (TF-TG) ENSMUSG00000014164	false
6086	TF-TG	ENSMUSG00000032035 (TF-TG) ENSMUSG00000068735	false
14276	TF-TG	ENSMUSG00000026398 (TF-TG) ENSMUSG00000059713	false
14275	TF-TG	ENSMUSG00000026398 (TF-TG) ENSMUSG00000059939	false
8131	TF-TG	ENSMUSG00000030353 (TF-TG) ENSMUSG00000015468	false
10179	TF-TG	ENSMUSG00000036036 (TF-TG) ENSMUSG00000029154	false
14274	TF-TG	ENSMUSG00000026398 (TF-TG) ENSMUSG00000059991	false
8128	TF-TG	ENSMUSG00000030353 (TF-TG) ENSMUSG00000016200	false
20415	TF-TG	ENSMUSG00000022346 (TF-TG) ENSMUSG00000025351	false
6079	TF-TG	ENSMUSG00000032035 (TF-TG) ENSMUSG00000069805	false
6078	TF-TG	ENSMUSG00000032035 (TF-TG) ENSMUSG00000069814	false
6077	TF-TG	ENSMUSG00000032035 (TF-TG) ENSMUSG00000069910	false
10172	TF-TG	ENSMUSG00000036036 (TF-TG) ENSMUSG00000029312	false
6075	TF-TG	ENSMUSG00000032035 (TF-TG) ENSMUSG00000070287	false
10171	TF-TG	ENSMUSG00000036036 (TF-TG) ENSMUSG00000029343	false
10170	TF-TG	ENSMUSG00000036036 (TF-TG) ENSMUSG00000029420	false
8121	TF-TG	ENSMUSG00000030353 (TF-TG) ENSMUSG00000017493	false
6072	TF-TG	ENSMUSG00000032035 (TF-TG) ENSMUSG00000070498	false
8119	TF-TG	ENSMUSG00000030353 (TF-TG) ENSMUSG00000017607	false
8117	TF-TG	ENSMUSG00000030353 (TF-TG) ENSMUSG00000017716	false
6069	TF-TG	ENSMUSG00000032035 (TF-TG) ENSMUSG00000070687	false
6067	TF-TG	ENSMUSG00000032035 (TF-TG) ENSMUSG00000070802	false
6066	TF-TG	ENSMUSG00000032035 (TF-TG) ENSMUSG00000070867	false
20401	TF-TG	ENSMUSG00000022346 (TF-TG) ENSMUSG00000025608	false
6064	TF-TG	ENSMUSG00000032035 (TF-TG) ENSMUSG00000071226	false
8111	TF-TG	ENSMUSG00000030353 (TF-TG) ENSMUSG00000018672	false
14254	TF-TG	ENSMUSG00000026398 (TF-TG) ENSMUSG00000072115	false
20397	TF-TG	ENSMUSG00000022346 (TF-TG) ENSMUSG00000025742	false
14253	TF-TG	ENSMUSG00000026398 (TF-TG) ENSMUSG00000072235	false
10157	TF-TG	ENSMUSG00000036036 (TF-TG) ENSMUSG00000029910	false
6059	TF-TG	ENSMUSG00000032035 (TF-TG) ENSMUSG00000071984	false
8106	TF-TG	ENSMUSG00000030353 (TF-TG) ENSMUSG00000019235	false
20393	TF-TG	ENSMUSG00000022346 (TF-TG) ENSMUSG00000025876	false
6057	TF-TG	ENSMUSG00000032035 (TF-TG) ENSMUSG00000072115	false
10153	TF-TG	ENSMUSG00000036036 (TF-TG) ENSMUSG00000030107	false
8104	TF-TG	ENSMUSG00000030353 (TF-TG) ENSMUSG00000019303	false
6056	TF-TG	ENSMUSG00000032035 (TF-TG) ENSMUSG00000072235	false
20391	TF-TG	ENSMUSG00000022346 (TF-TG) ENSMUSG00000025938	false
10151	TF-TG	ENSMUSG00000036036 (TF-TG) ENSMUSG00000030137	false
20390	TF-TG	ENSMUSG00000022346 (TF-TG) ENSMUSG00000025969	false
14246	TF-TG	ENSMUSG00000026398 (TF-TG) ENSMUSG00000079038	false
10150	TF-TG	ENSMUSG00000036036 (TF-TG) ENSMUSG00000030199	false
14244	TF-TG	ENSMUSG00000026398 (TF-TG) ENSMUSG00000089789	false
8100	TF-TG	ENSMUSG00000030353 (TF-TG) ENSMUSG00000019775	false
10147	TF-TG	ENSMUSG00000036036 (TF-TG) ENSMUSG00000030287	false
8098	TF-TG	ENSMUSG00000030353 (TF-TG) ENSMUSG00000019945	false
6050	TF-TG	ENSMUSG00000032035 (TF-TG) ENSMUSG00000072849	false
10146	TF-TG	ENSMUSG00000036036 (TF-TG) ENSMUSG00000030329	false
8096	TF-TG	ENSMUSG00000030353 (TF-TG) ENSMUSG00000019992	false
10144	TF-TG	ENSMUSG00000036036 (TF-TG) ENSMUSG00000030353	false
6047	TF-TG	ENSMUSG00000032035 (TF-TG) ENSMUSG00000073409	false
20379	TF-TG	ENSMUSG00000022346 (TF-TG) ENSMUSG00000026303	false
6041	TF-TG	ENSMUSG00000032035 (TF-TG) ENSMUSG00000074183	false
8088	TF-TG	ENSMUSG00000030353 (TF-TG) ENSMUSG00000020226	false
20374	TF-TG	ENSMUSG00000022346 (TF-TG) ENSMUSG00000026355	false
20372	TF-TG	ENSMUSG00000022346 (TF-TG) ENSMUSG00000026380	false
6036	TF-TG	ENSMUSG00000032035 (TF-TG) ENSMUSG00000074651	false
20371	TF-TG	ENSMUSG00000022346 (TF-TG) ENSMUSG00000026398	false
8083	TF-TG	ENSMUSG00000030353 (TF-TG) ENSMUSG00000020471	false
6035	TF-TG	ENSMUSG00000032035 (TF-TG) ENSMUSG00000074652	false
6033	TF-TG	ENSMUSG00000032035 (TF-TG) ENSMUSG00000074802	false
8080	TF-TG	ENSMUSG00000030353 (TF-TG) ENSMUSG00000020649	false
6031	TF-TG	ENSMUSG00000032035 (TF-TG) ENSMUSG00000074892	false
6030	TF-TG	ENSMUSG00000032035 (TF-TG) ENSMUSG00000074896	false
10126	TF-TG	ENSMUSG00000036036 (TF-TG) ENSMUSG00000031629	false
6029	TF-TG	ENSMUSG00000032035 (TF-TG) ENSMUSG00000075012	false
10125	TF-TG	ENSMUSG00000036036 (TF-TG) ENSMUSG00000031668	false
10124	TF-TG	ENSMUSG00000036036 (TF-TG) ENSMUSG00000031730	false
20363	TF-TG	ENSMUSG00000022346 (TF-TG) ENSMUSG00000026483	false
8075	TF-TG	ENSMUSG00000030353 (TF-TG) ENSMUSG00000020788	false
10123	TF-TG	ENSMUSG00000036036 (TF-TG) ENSMUSG00000031757	false
20362	TF-TG	ENSMUSG00000022346 (TF-TG) ENSMUSG00000026504	false
10122	TF-TG	ENSMUSG00000036036 (TF-TG) ENSMUSG00000031760	false
8073	TF-TG	ENSMUSG00000030353 (TF-TG) ENSMUSG00000020846	false
10120	TF-TG	ENSMUSG00000036036 (TF-TG) ENSMUSG00000031788	false
10119	TF-TG	ENSMUSG00000036036 (TF-TG) ENSMUSG00000031790	false
20358	TF-TG	ENSMUSG00000022346 (TF-TG) ENSMUSG00000026546	false
8070	TF-TG	ENSMUSG00000030353 (TF-TG) ENSMUSG00000020900	false
10118	TF-TG	ENSMUSG00000036036 (TF-TG) ENSMUSG00000031791	false
8069	TF-TG	ENSMUSG00000030353 (TF-TG) ENSMUSG00000020901	false
10117	TF-TG	ENSMUSG00000036036 (TF-TG) ENSMUSG00000031844	false
6019	TF-TG	ENSMUSG00000032035 (TF-TG) ENSMUSG00000078349	false
20353	TF-TG	ENSMUSG00000022346 (TF-TG) ENSMUSG00000026646	false
6016	TF-TG	ENSMUSG00000032035 (TF-TG) ENSMUSG00000078773	false
20351	TF-TG	ENSMUSG00000022346 (TF-TG) ENSMUSG00000026669	false
6015	TF-TG	ENSMUSG00000032035 (TF-TG) ENSMUSG00000078949	false
10111	TF-TG	ENSMUSG00000036036 (TF-TG) ENSMUSG00000031981	false
20350	TF-TG	ENSMUSG00000022346 (TF-TG) ENSMUSG00000026683	false
20348	TF-TG	ENSMUSG00000022346 (TF-TG) ENSMUSG00000026700	false
6011	TF-TG	ENSMUSG00000032035 (TF-TG) ENSMUSG00000079038	false
10107	TF-TG	ENSMUSG00000036036 (TF-TG) ENSMUSG00000032092	false
10104	TF-TG	ENSMUSG00000036036 (TF-TG) ENSMUSG00000032232	false
6003	TF-TG	ENSMUSG00000032035 (TF-TG) ENSMUSG00000079685	false
20336	TF-TG	ENSMUSG00000022346 (TF-TG) ENSMUSG00000026833	false
8048	TF-TG	ENSMUSG00000030353 (TF-TG) ENSMUSG00000021838	false
6000	TF-TG	ENSMUSG00000032035 (TF-TG) ENSMUSG00000089789	false
10096	TF-TG	ENSMUSG00000036036 (TF-TG) ENSMUSG00000032350	false
8047	TF-TG	ENSMUSG00000030353 (TF-TG) ENSMUSG00000021846	false
8046	TF-TG	ENSMUSG00000030353 (TF-TG) ENSMUSG00000021876	false
8045	TF-TG	ENSMUSG00000030353 (TF-TG) ENSMUSG00000022003	false
5996	TF-TG	ENSMUSG00000032035 (TF-TG) ENSMUSG00000092486	false
10090	TF-TG	ENSMUSG00000036036 (TF-TG) ENSMUSG00000032531	false
8041	TF-TG	ENSMUSG00000030353 (TF-TG) ENSMUSG00000022148	false
5993	TF-TG	ENSMUSG00000032035 (TF-TG) ENSMUSG00000094928	false
10089	TF-TG	ENSMUSG00000036036 (TF-TG) ENSMUSG00000032532	false
20328	TF-TG	ENSMUSG00000022346 (TF-TG) ENSMUSG00000027006	false
5991	TF-TG	ENSMUSG00000032035 (TF-TG) ENSMUSG00000095567	false
8038	TF-TG	ENSMUSG00000030353 (TF-TG) ENSMUSG00000022253	false
20324	TF-TG	ENSMUSG00000022346 (TF-TG) ENSMUSG00000027075	false
5987	TF-TG	ENSMUSG00000032035 (TF-TG) ENSMUSG00000096847	false
20322	TF-TG	ENSMUSG00000022346 (TF-TG) ENSMUSG00000027230	false
5986	TF-TG	ENSMUSG00000032035 (TF-TG) ENSMUSG00000098557	false
10082	TF-TG	ENSMUSG00000036036 (TF-TG) ENSMUSG00000032773	false
8033	TF-TG	ENSMUSG00000030353 (TF-TG) ENSMUSG00000022489	false
20319	TF-TG	ENSMUSG00000022346 (TF-TG) ENSMUSG00000027273	false
5981	TF-TG	ENSMUSG00000032035 (TF-TG) ENSMUSG00000110206	false
8028	TF-TG	ENSMUSG00000030353 (TF-TG) ENSMUSG00000022769	false
10076	TF-TG	ENSMUSG00000036036 (TF-TG) ENSMUSG00000033032	false
8027	TF-TG	ENSMUSG00000030353 (TF-TG) ENSMUSG00000022773	false
20312	TF-TG	ENSMUSG00000022346 (TF-TG) ENSMUSG00000027420	false
20311	TF-TG	ENSMUSG00000022346 (TF-TG) ENSMUSG00000027435	false
8023	TF-TG	ENSMUSG00000030353 (TF-TG) ENSMUSG00000022912	false
5975	TF-lincRNA	ENSMUSG00000032035 (TF-lincRNA) ENSMUSG00000085183	false
5974	TF-lincRNA	ENSMUSG00000032035 (TF-lincRNA) ENSMUSG00000103043	false
10070	TF-TG	ENSMUSG00000036036 (TF-TG) ENSMUSG00000033307	false
8021	TF-TG	ENSMUSG00000030353 (TF-TG) ENSMUSG00000022945	false
5972	TF-lincRNA	ENSMUSG00000032035 (TF-lincRNA) ENSMUSG00000097561	false
10066	TF-TG	ENSMUSG00000036036 (TF-TG) ENSMUSG00000033825	false
20304	TF-TG	ENSMUSG00000022346 (TF-TG) ENSMUSG00000027533	false
5966	TF-lincRNA	ENSMUSG00000032035 (TF-lincRNA) ENSMUSG00000097932	false
5965	TF-lincRNA	ENSMUSG00000032035 (TF-lincRNA) ENSMUSG00000099552	false
10061	TF-TG	ENSMUSG00000036036 (TF-TG) ENSMUSG00000034118	false
20300	TF-TG	ENSMUSG00000022346 (TF-TG) ENSMUSG00000027611	false
8012	TF-TG	ENSMUSG00000030353 (TF-TG) ENSMUSG00000023886	false
5964	TF-lincRNA	ENSMUSG00000032035 (TF-lincRNA) ENSMUSG00000097284	false
20298	TF-TG	ENSMUSG00000022346 (TF-TG) ENSMUSG00000027635	false
10058	TF-TG	ENSMUSG00000036036 (TF-TG) ENSMUSG00000034265	false
20295	TF-TG	ENSMUSG00000022346 (TF-TG) ENSMUSG00000027661	false
10053	TF-TG	ENSMUSG00000036036 (TF-TG) ENSMUSG00000034579	false
8003	TF-TG	ENSMUSG00000030353 (TF-TG) ENSMUSG00000024193	false
5955	TF-lincRNA	ENSMUSG00000032035 (TF-lincRNA) ENSMUSG00000097632	false
10051	TF-TG	ENSMUSG00000036036 (TF-TG) ENSMUSG00000034656	false
8001	TF-TG	ENSMUSG00000030353 (TF-TG) ENSMUSG00000024299	false
10048	TF-TG	ENSMUSG00000036036 (TF-TG) ENSMUSG00000034768	false
20287	TF-TG	ENSMUSG00000022346 (TF-TG) ENSMUSG00000027797	false
5951	TF-miRNA	ENSMUSG00000032035 (TF-miRNA) mmu-miR-1945	false
20285	TF-TG	ENSMUSG00000022346 (TF-TG) ENSMUSG00000027834	false
7996	TF-TG	ENSMUSG00000030353 (TF-TG) ENSMUSG00000024366	false
7995	TF-TG	ENSMUSG00000030353 (TF-TG) ENSMUSG00000024512	false
20281	TF-TG	ENSMUSG00000022346 (TF-TG) ENSMUSG00000027931	false
7993	TF-TG	ENSMUSG00000030353 (TF-TG) ENSMUSG00000024533	false
10040	TF-TG	ENSMUSG00000036036 (TF-TG) ENSMUSG00000035273	false
10038	TF-TG	ENSMUSG00000036036 (TF-TG) ENSMUSG00000035357	false
20277	TF-TG	ENSMUSG00000022346 (TF-TG) ENSMUSG00000028039	false
7986	TF-TG	ENSMUSG00000030353 (TF-TG) ENSMUSG00000024613	false
10031	TF-TG	ENSMUSG00000036036 (TF-TG) ENSMUSG00000035683	false
7980	TF-TG	ENSMUSG00000030353 (TF-TG) ENSMUSG00000024891	false
20266	TF-TG	ENSMUSG00000022346 (TF-TG) ENSMUSG00000028282	false
7977	TF-TG	ENSMUSG00000030353 (TF-TG) ENSMUSG00000024912	false
10025	TF-TG	ENSMUSG00000036036 (TF-TG) ENSMUSG00000036256	false
20264	TF-TG	ENSMUSG00000022346 (TF-TG) ENSMUSG00000028312	false
20262	TF-TG	ENSMUSG00000022346 (TF-TG) ENSMUSG00000028356	false
7974	TF-TG	ENSMUSG00000030353 (TF-TG) ENSMUSG00000025064	false
20259	TF-TG	ENSMUSG00000022346 (TF-TG) ENSMUSG00000028403	false
20258	TF-TG	ENSMUSG00000022346 (TF-TG) ENSMUSG00000028415	false
10018	TF-TG	ENSMUSG00000036036 (TF-TG) ENSMUSG00000036745	false
7969	TF-TG	ENSMUSG00000030353 (TF-TG) ENSMUSG00000025351	false
10017	TF-TG	ENSMUSG00000036036 (TF-TG) ENSMUSG00000036777	false
10016	TF-TG	ENSMUSG00000036036 (TF-TG) ENSMUSG00000036863	false
10014	TF-TG	ENSMUSG00000036036 (TF-TG) ENSMUSG00000036887	false
20252	TF-TG	ENSMUSG00000022346 (TF-TG) ENSMUSG00000028532	false
7963	TF-TG	ENSMUSG00000030353 (TF-TG) ENSMUSG00000025608	false
7962	TF-TG	ENSMUSG00000030353 (TF-TG) ENSMUSG00000025742	false
20249	TF-TG	ENSMUSG00000022346 (TF-TG) ENSMUSG00000028555	false
10009	TF-TG	ENSMUSG00000036036 (TF-TG) ENSMUSG00000037159	false
7957	TF-TG	ENSMUSG00000030353 (TF-TG) ENSMUSG00000025938	false
20244	TF-TG	ENSMUSG00000022346 (TF-TG) ENSMUSG00000028602	false
7956	TF-TG	ENSMUSG00000030353 (TF-TG) ENSMUSG00000025969	false
10004	TF-TG	ENSMUSG00000036036 (TF-TG) ENSMUSG00000037509	false
20240	TF-TG	ENSMUSG00000022346 (TF-TG) ENSMUSG00000028634	false
7952	TF-TG	ENSMUSG00000030353 (TF-TG) ENSMUSG00000026303	false
20238	TF-TG	ENSMUSG00000022346 (TF-TG) ENSMUSG00000028693	false
20237	TF-TG	ENSMUSG00000022346 (TF-TG) ENSMUSG00000028699	false
9996	TF-TG	ENSMUSG00000036036 (TF-TG) ENSMUSG00000037820	false
20235	TF-TG	ENSMUSG00000022346 (TF-TG) ENSMUSG00000028763	false
20232	TF-TG	ENSMUSG00000022346 (TF-TG) ENSMUSG00000028825	false
7942	TF-TG	ENSMUSG00000030353 (TF-TG) ENSMUSG00000026546	false
9990	TF-TG	ENSMUSG00000036036 (TF-TG) ENSMUSG00000038068	false
7940	TF-TG	ENSMUSG00000030353 (TF-TG) ENSMUSG00000026646	false
7939	TF-TG	ENSMUSG00000030353 (TF-TG) ENSMUSG00000026669	false
20226	TF-TG	ENSMUSG00000022346 (TF-TG) ENSMUSG00000028909	false
7938	TF-TG	ENSMUSG00000030353 (TF-TG) ENSMUSG00000026683	false
9986	TF-TG	ENSMUSG00000036036 (TF-TG) ENSMUSG00000038241	false
7937	TF-TG	ENSMUSG00000030353 (TF-TG) ENSMUSG00000026700	false
20224	TF-TG	ENSMUSG00000022346 (TF-TG) ENSMUSG00000028927	false
9984	TF-TG	ENSMUSG00000036036 (TF-TG) ENSMUSG00000038319	false
20223	TF-TG	ENSMUSG00000022346 (TF-TG) ENSMUSG00000028949	false
9983	TF-TG	ENSMUSG00000036036 (TF-TG) ENSMUSG00000038349	false
20221	TF-TG	ENSMUSG00000022346 (TF-TG) ENSMUSG00000028986	false
9981	TF-TG	ENSMUSG00000036036 (TF-TG) ENSMUSG00000038486	false
7930	TF-TG	ENSMUSG00000030353 (TF-TG) ENSMUSG00000026833	false
20213	TF-TG	ENSMUSG00000022346 (TF-TG) ENSMUSG00000029154	false
9972	TF-TG	ENSMUSG00000036036 (TF-TG) ENSMUSG00000038903	false
9969	TF-TG	ENSMUSG00000036036 (TF-TG) ENSMUSG00000039115	false
7919	TF-TG	ENSMUSG00000030353 (TF-TG) ENSMUSG00000027420	false
9967	TF-TG	ENSMUSG00000036036 (TF-TG) ENSMUSG00000039145	false
20206	TF-TG	ENSMUSG00000022346 (TF-TG) ENSMUSG00000029312	false
7918	TF-TG	ENSMUSG00000030353 (TF-TG) ENSMUSG00000027435	false
20204	TF-TG	ENSMUSG00000022346 (TF-TG) ENSMUSG00000029343	false
20202	TF-TG	ENSMUSG00000022346 (TF-TG) ENSMUSG00000029408	false
7914	TF-TG	ENSMUSG00000030353 (TF-TG) ENSMUSG00000027533	false
9961	TF-TG	ENSMUSG00000036036 (TF-TG) ENSMUSG00000039234	false
20200	TF-TG	ENSMUSG00000022346 (TF-TG) ENSMUSG00000029420	false
7911	TF-TG	ENSMUSG00000030353 (TF-TG) ENSMUSG00000027611	false
9959	TF-TG	ENSMUSG00000036036 (TF-TG) ENSMUSG00000039372	false
7909	TF-TG	ENSMUSG00000030353 (TF-TG) ENSMUSG00000027635	false
7908	TF-TG	ENSMUSG00000030353 (TF-TG) ENSMUSG00000027797	false
7904	TF-TG	ENSMUSG00000030353 (TF-TG) ENSMUSG00000028039	false
7900	TF-TG	ENSMUSG00000030353 (TF-TG) ENSMUSG00000028282	false
9947	TF-TG	ENSMUSG00000036036 (TF-TG) ENSMUSG00000040046	false
7898	TF-TG	ENSMUSG00000030353 (TF-TG) ENSMUSG00000028356	false
7897	TF-TG	ENSMUSG00000030353 (TF-TG) ENSMUSG00000028403	false
7896	TF-TG	ENSMUSG00000030353 (TF-TG) ENSMUSG00000028415	false
9942	TF-TG	ENSMUSG00000036036 (TF-TG) ENSMUSG00000040276	false
7893	TF-TG	ENSMUSG00000030353 (TF-TG) ENSMUSG00000028555	false
9941	TF-TG	ENSMUSG00000036036 (TF-TG) ENSMUSG00000040339	false
9939	TF-TG	ENSMUSG00000036036 (TF-TG) ENSMUSG00000040433	false
7890	TF-TG	ENSMUSG00000030353 (TF-TG) ENSMUSG00000028602	false
20176	TF-TG	ENSMUSG00000022346 (TF-TG) ENSMUSG00000029875	false
20175	TF-TG	ENSMUSG00000022346 (TF-TG) ENSMUSG00000029910	false
7887	TF-TG	ENSMUSG00000030353 (TF-TG) ENSMUSG00000028634	false
7886	TF-TG	ENSMUSG00000030353 (TF-TG) ENSMUSG00000028699	false
7884	TF-TG	ENSMUSG00000030353 (TF-TG) ENSMUSG00000028763	false
20169	TF-TG	ENSMUSG00000022346 (TF-TG) ENSMUSG00000030107	false
7880	TF-TG	ENSMUSG00000030353 (TF-TG) ENSMUSG00000028927	false
20167	TF-TG	ENSMUSG00000022346 (TF-TG) ENSMUSG00000030137	false
20166	TF-TG	ENSMUSG00000022346 (TF-TG) ENSMUSG00000030199	false
20163	TF-TG	ENSMUSG00000022346 (TF-TG) ENSMUSG00000030287	false
20162	TF-TG	ENSMUSG00000022346 (TF-TG) ENSMUSG00000030329	false
7874	TF-TG	ENSMUSG00000030353 (TF-TG) ENSMUSG00000029154	false
9922	TF-TG	ENSMUSG00000036036 (TF-TG) ENSMUSG00000041202	false
9920	TF-TG	ENSMUSG00000036036 (TF-TG) ENSMUSG00000041268	false
20159	TF-TG	ENSMUSG00000022346 (TF-TG) ENSMUSG00000030353	false
9919	TF-TG	ENSMUSG00000036036 (TF-TG) ENSMUSG00000041351	false
9918	TF-TG	ENSMUSG00000036036 (TF-TG) ENSMUSG00000041420	false
7868	TF-TG	ENSMUSG00000030353 (TF-TG) ENSMUSG00000029420	false
20150	TF-TG	ENSMUSG00000022346 (TF-TG) ENSMUSG00000030659	false
9908	TF-TG	ENSMUSG00000036036 (TF-TG) ENSMUSG00000041801	false
7859	TF-TG	ENSMUSG00000030353 (TF-TG) ENSMUSG00000029875	false
20146	TF-TG	ENSMUSG00000022346 (TF-TG) ENSMUSG00000030772	false
7858	TF-TG	ENSMUSG00000030353 (TF-TG) ENSMUSG00000029910	false
7854	TF-TG	ENSMUSG00000030353 (TF-TG) ENSMUSG00000030137	false
7853	TF-TG	ENSMUSG00000030353 (TF-TG) ENSMUSG00000030199	false
7850	TF-TG	ENSMUSG00000030353 (TF-TG) ENSMUSG00000030287	false
9897	TF-TG	ENSMUSG00000036036 (TF-TG) ENSMUSG00000042489	false
7843	TF-TG	ENSMUSG00000030353 (TF-TG) ENSMUSG00000030659	false
9891	TF-TG	ENSMUSG00000036036 (TF-TG) ENSMUSG00000042804	false
9890	TF-TG	ENSMUSG00000036036 (TF-TG) ENSMUSG00000042842	false
7841	TF-TG	ENSMUSG00000030353 (TF-TG) ENSMUSG00000030772	false
9886	TF-TG	ENSMUSG00000036036 (TF-TG) ENSMUSG00000043015	false
7830	TF-TG	ENSMUSG00000030353 (TF-TG) ENSMUSG00000031629	false
7827	TF-TG	ENSMUSG00000030353 (TF-TG) ENSMUSG00000031730	false
20114	TF-TG	ENSMUSG00000022346 (TF-TG) ENSMUSG00000031629	false
7826	TF-TG	ENSMUSG00000030353 (TF-TG) ENSMUSG00000031757	false
9874	TF-TG	ENSMUSG00000036036 (TF-TG) ENSMUSG00000044005	false
20113	TF-TG	ENSMUSG00000022346 (TF-TG) ENSMUSG00000031668	false
7825	TF-TG	ENSMUSG00000030353 (TF-TG) ENSMUSG00000031760	false
7824	TF-TG	ENSMUSG00000030353 (TF-TG) ENSMUSG00000031788	false
20111	TF-TG	ENSMUSG00000022346 (TF-TG) ENSMUSG00000031730	false
7823	TF-TG	ENSMUSG00000030353 (TF-TG) ENSMUSG00000031790	false
7822	TF-TG	ENSMUSG00000030353 (TF-TG) ENSMUSG00000031791	false
20109	TF-TG	ENSMUSG00000022346 (TF-TG) ENSMUSG00000031757	false
7821	TF-TG	ENSMUSG00000030353 (TF-TG) ENSMUSG00000031844	false
20108	TF-TG	ENSMUSG00000022346 (TF-TG) ENSMUSG00000031760	false
20106	TF-TG	ENSMUSG00000022346 (TF-TG) ENSMUSG00000031788	false
9866	TF-TG	ENSMUSG00000036036 (TF-TG) ENSMUSG00000044626	false
20105	TF-TG	ENSMUSG00000022346 (TF-TG) ENSMUSG00000031790	false
9865	TF-TG	ENSMUSG00000036036 (TF-TG) ENSMUSG00000044646	false
20104	TF-TG	ENSMUSG00000022346 (TF-TG) ENSMUSG00000031791	false
20103	TF-TG	ENSMUSG00000022346 (TF-TG) ENSMUSG00000031844	false
7814	TF-TG	ENSMUSG00000030353 (TF-TG) ENSMUSG00000032035	false
9862	TF-TG	ENSMUSG00000036036 (TF-TG) ENSMUSG00000045007	false
7809	TF-TG	ENSMUSG00000030353 (TF-TG) ENSMUSG00000032232	false
20096	TF-TG	ENSMUSG00000022346 (TF-TG) ENSMUSG00000031981	false
9856	TF-TG	ENSMUSG00000036036 (TF-TG) ENSMUSG00000045518	false
9854	TF-TG	ENSMUSG00000036036 (TF-TG) ENSMUSG00000045790	false
7805	TF-TG	ENSMUSG00000030353 (TF-TG) ENSMUSG00000032350	false
20091	TF-TG	ENSMUSG00000022346 (TF-TG) ENSMUSG00000032035	false
20089	TF-TG	ENSMUSG00000022346 (TF-TG) ENSMUSG00000032092	false
9847	TF-TG	ENSMUSG00000036036 (TF-TG) ENSMUSG00000046204	false
7798	TF-TG	ENSMUSG00000030353 (TF-TG) ENSMUSG00000032531	false
9846	TF-TG	ENSMUSG00000036036 (TF-TG) ENSMUSG00000046242	false
20082	TF-TG	ENSMUSG00000022346 (TF-TG) ENSMUSG00000032232	false
7791	TF-TG	ENSMUSG00000030353 (TF-TG) ENSMUSG00000032902	false
9839	TF-TG	ENSMUSG00000036036 (TF-TG) ENSMUSG00000046841	false
9836	TF-TG	ENSMUSG00000036036 (TF-TG) ENSMUSG00000047109	false
7787	TF-TG	ENSMUSG00000030353 (TF-TG) ENSMUSG00000033032	false
9834	TF-TG	ENSMUSG00000036036 (TF-TG) ENSMUSG00000047181	false
9831	TF-TG	ENSMUSG00000036036 (TF-TG) ENSMUSG00000047473	false
20069	TF-TG	ENSMUSG00000022346 (TF-TG) ENSMUSG00000032350	false
9823	TF-TG	ENSMUSG00000036036 (TF-TG) ENSMUSG00000047878	false
7774	TF-TG	ENSMUSG00000030353 (TF-TG) ENSMUSG00000033970	false
9821	TF-TG	ENSMUSG00000036036 (TF-TG) ENSMUSG00000047963	false
20058	TF-TG	ENSMUSG00000022346 (TF-TG) ENSMUSG00000032531	false
20057	TF-TG	ENSMUSG00000022346 (TF-TG) ENSMUSG00000032532	false
7769	TF-TG	ENSMUSG00000030353 (TF-TG) ENSMUSG00000034768	false
7767	TF-TG	ENSMUSG00000030353 (TF-TG) ENSMUSG00000034818	false
9815	TF-TG	ENSMUSG00000036036 (TF-TG) ENSMUSG00000048349	false
7762	TF-TG	ENSMUSG00000030353 (TF-TG) ENSMUSG00000035164	false
20048	TF-TG	ENSMUSG00000022346 (TF-TG) ENSMUSG00000032773	false
9805	TF-TG	ENSMUSG00000036036 (TF-TG) ENSMUSG00000049288	false
20042	TF-TG	ENSMUSG00000022346 (TF-TG) ENSMUSG00000032902	false
7754	TF-TG	ENSMUSG00000030353 (TF-TG) ENSMUSG00000035683	false
9802	TF-TG	ENSMUSG00000036036 (TF-TG) ENSMUSG00000049436	false
20037	TF-TG	ENSMUSG00000022346 (TF-TG) ENSMUSG00000033032	false
7749	TF-TG	ENSMUSG00000030353 (TF-TG) ENSMUSG00000036036	false
7747	TF-TG	ENSMUSG00000030353 (TF-TG) ENSMUSG00000036223	false
7743	TF-TG	ENSMUSG00000030353 (TF-TG) ENSMUSG00000036777	false
20029	TF-TG	ENSMUSG00000022346 (TF-TG) ENSMUSG00000033307	false
7740	TF-TG	ENSMUSG00000030353 (TF-TG) ENSMUSG00000036887	false
7738	TF-TG	ENSMUSG00000030353 (TF-TG) ENSMUSG00000036944	false
9783	TF-TG	ENSMUSG00000036036 (TF-TG) ENSMUSG00000050824	false
7734	TF-TG	ENSMUSG00000030353 (TF-TG) ENSMUSG00000037159	false
20019	TF-TG	ENSMUSG00000022346 (TF-TG) ENSMUSG00000033825	false
7730	TF-TG	ENSMUSG00000030353 (TF-TG) ENSMUSG00000037509	false
9778	TF-TG	ENSMUSG00000036036 (TF-TG) ENSMUSG00000051251	false
9777	TF-TG	ENSMUSG00000036036 (TF-TG) ENSMUSG00000051314	false
9774	TF-TG	ENSMUSG00000036036 (TF-TG) ENSMUSG00000051457	false
20013	TF-TG	ENSMUSG00000022346 (TF-TG) ENSMUSG00000033970	false
7723	TF-TG	ENSMUSG00000030353 (TF-TG) ENSMUSG00000037643	false
20010	TF-TG	ENSMUSG00000022346 (TF-TG) ENSMUSG00000034118	false
9769	TF-TG	ENSMUSG00000036036 (TF-TG) ENSMUSG00000052117	false
20007	TF-TG	ENSMUSG00000022346 (TF-TG) ENSMUSG00000034265	false
7718	TF-TG	ENSMUSG00000030353 (TF-TG) ENSMUSG00000037820	false
9763	TF-TG	ENSMUSG00000036036 (TF-TG) ENSMUSG00000052921	false
20000	TF-TG	ENSMUSG00000022346 (TF-TG) ENSMUSG00000034579	false
7712	TF-TG	ENSMUSG00000030353 (TF-TG) ENSMUSG00000038241	false
7710	TF-TG	ENSMUSG00000030353 (TF-TG) ENSMUSG00000038319	false
19997	TF-TG	ENSMUSG00000022346 (TF-TG) ENSMUSG00000034656	false
7709	TF-TG	ENSMUSG00000030353 (TF-TG) ENSMUSG00000038349	false
9757	TF-TG	ENSMUSG00000036036 (TF-TG) ENSMUSG00000053414	false
19993	TF-TG	ENSMUSG00000022346 (TF-TG) ENSMUSG00000034768	false
7705	TF-TG	ENSMUSG00000030353 (TF-TG) ENSMUSG00000038486	false
9753	TF-TG	ENSMUSG00000036036 (TF-TG) ENSMUSG00000053765	false
9750	TF-TG	ENSMUSG00000036036 (TF-TG) ENSMUSG00000053963	false
19989	TF-TG	ENSMUSG00000022346 (TF-TG) ENSMUSG00000034818	false
7701	TF-TG	ENSMUSG00000030353 (TF-TG) ENSMUSG00000038578	false
9746	TF-TG	ENSMUSG00000036036 (TF-TG) ENSMUSG00000054555	false
9745	TF-TG	ENSMUSG00000036036 (TF-TG) ENSMUSG00000054582	false
7696	TF-TG	ENSMUSG00000030353 (TF-TG) ENSMUSG00000038903	false
19983	TF-TG	ENSMUSG00000022346 (TF-TG) ENSMUSG00000035164	false
19980	TF-TG	ENSMUSG00000022346 (TF-TG) ENSMUSG00000035273	false
19977	TF-TG	ENSMUSG00000022346 (TF-TG) ENSMUSG00000035357	false
7689	TF-TG	ENSMUSG00000030353 (TF-TG) ENSMUSG00000039234	false
7687	TF-TG	ENSMUSG00000030353 (TF-TG) ENSMUSG00000039323	false
9735	TF-TG	ENSMUSG00000036036 (TF-TG) ENSMUSG00000055567	false
7686	TF-TG	ENSMUSG00000030353 (TF-TG) ENSMUSG00000039384	false
7685	TF-TG	ENSMUSG00000030353 (TF-TG) ENSMUSG00000039395	false
9730	TF-TG	ENSMUSG00000036036 (TF-TG) ENSMUSG00000055805	false
7679	TF-TG	ENSMUSG00000030353 (TF-TG) ENSMUSG00000039831	false
19966	TF-TG	ENSMUSG00000022346 (TF-TG) ENSMUSG00000035683	false
7678	TF-TG	ENSMUSG00000030353 (TF-TG) ENSMUSG00000040046	false
7675	TF-TG	ENSMUSG00000030353 (TF-TG) ENSMUSG00000040339	false
9723	TF-TG	ENSMUSG00000036036 (TF-TG) ENSMUSG00000056602	false
7674	TF-TG	ENSMUSG00000030353 (TF-TG) ENSMUSG00000040462	false
19961	TF-TG	ENSMUSG00000022346 (TF-TG) ENSMUSG00000035849	false
9716	TF-TG	ENSMUSG00000036036 (TF-TG) ENSMUSG00000057897	false
9714	TF-TG	ENSMUSG00000036036 (TF-TG) ENSMUSG00000058070	false
19953	TF-TG	ENSMUSG00000022346 (TF-TG) ENSMUSG00000036036	false
7663	TF-TG	ENSMUSG00000030353 (TF-TG) ENSMUSG00000041202	false
19950	TF-TG	ENSMUSG00000022346 (TF-TG) ENSMUSG00000036223	false
7662	TF-TG	ENSMUSG00000030353 (TF-TG) ENSMUSG00000041268	false
19948	TF-TG	ENSMUSG00000022346 (TF-TG) ENSMUSG00000036256	false
7656	TF-TG	ENSMUSG00000030353 (TF-TG) ENSMUSG00000041688	false
7655	TF-TG	ENSMUSG00000030353 (TF-TG) ENSMUSG00000041801	false
9702	TF-TG	ENSMUSG00000036036 (TF-TG) ENSMUSG00000059713	false
9701	TF-TG	ENSMUSG00000036036 (TF-TG) ENSMUSG00000059939	false
19940	TF-TG	ENSMUSG00000022346 (TF-TG) ENSMUSG00000036745	false
9700	TF-TG	ENSMUSG00000036036 (TF-TG) ENSMUSG00000059991	false
19938	TF-TG	ENSMUSG00000022346 (TF-TG) ENSMUSG00000036777	false
19936	TF-TG	ENSMUSG00000022346 (TF-TG) ENSMUSG00000036863	false
9696	TF-TG	ENSMUSG00000036036 (TF-TG) ENSMUSG00000060550	false
19933	TF-TG	ENSMUSG00000022346 (TF-TG) ENSMUSG00000036887	false
7644	TF-TG	ENSMUSG00000030353 (TF-TG) ENSMUSG00000042489	false
19929	TF-TG	ENSMUSG00000022346 (TF-TG) ENSMUSG00000036944	false
9688	TF-TG	ENSMUSG00000036036 (TF-TG) ENSMUSG00000062210	false
9687	TF-TG	ENSMUSG00000036036 (TF-TG) ENSMUSG00000062248	false
7638	TF-TG	ENSMUSG00000030353 (TF-TG) ENSMUSG00000042804	false
7637	TF-TG	ENSMUSG00000030353 (TF-TG) ENSMUSG00000042842	false
9685	TF-TG	ENSMUSG00000036036 (TF-TG) ENSMUSG00000062760	false
7633	TF-TG	ENSMUSG00000030353 (TF-TG) ENSMUSG00000043154	false
9681	TF-TG	ENSMUSG00000036036 (TF-TG) ENSMUSG00000063810	false
19920	TF-TG	ENSMUSG00000022346 (TF-TG) ENSMUSG00000037159	false
9680	TF-TG	ENSMUSG00000036036 (TF-TG) ENSMUSG00000064090	false
7628	TF-TG	ENSMUSG00000030353 (TF-TG) ENSMUSG00000044005	false
9676	TF-TG	ENSMUSG00000036036 (TF-TG) ENSMUSG00000064267	false
9674	TF-TG	ENSMUSG00000036036 (TF-TG) ENSMUSG00000065952	false
19912	TF-TG	ENSMUSG00000022346 (TF-TG) ENSMUSG00000037509	false
19909	TF-TG	ENSMUSG00000022346 (TF-TG) ENSMUSG00000037580	false
7621	TF-TG	ENSMUSG00000030353 (TF-TG) ENSMUSG00000044626	false
9669	TF-TG	ENSMUSG00000036036 (TF-TG) ENSMUSG00000067813	false
7620	TF-TG	ENSMUSG00000030353 (TF-TG) ENSMUSG00000044646	false
9667	TF-TG	ENSMUSG00000036036 (TF-TG) ENSMUSG00000068154	false
9666	TF-TG	ENSMUSG00000036036 (TF-TG) ENSMUSG00000068196	false
19903	TF-TG	ENSMUSG00000022346 (TF-TG) ENSMUSG00000037643	false
9663	TF-TG	ENSMUSG00000036036 (TF-TG) ENSMUSG00000068735	false
7613	TF-TG	ENSMUSG00000030353 (TF-TG) ENSMUSG00000045518	false
9660	TF-TG	ENSMUSG00000036036 (TF-TG) ENSMUSG00000069227	false
7611	TF-TG	ENSMUSG00000030353 (TF-TG) ENSMUSG00000045790	false
19897	TF-TG	ENSMUSG00000022346 (TF-TG) ENSMUSG00000037820	false
9657	TF-TG	ENSMUSG00000036036 (TF-TG) ENSMUSG00000069814	false
9656	TF-TG	ENSMUSG00000036036 (TF-TG) ENSMUSG00000069910	false
7607	TF-TG	ENSMUSG00000030353 (TF-TG) ENSMUSG00000046204	false
9655	TF-TG	ENSMUSG00000036036 (TF-TG) ENSMUSG00000070287	false
7605	TF-TG	ENSMUSG00000030353 (TF-TG) ENSMUSG00000046223	false
7604	TF-TG	ENSMUSG00000030353 (TF-TG) ENSMUSG00000046242	false
7602	TF-TG	ENSMUSG00000030353 (TF-TG) ENSMUSG00000046410	false
9650	TF-TG	ENSMUSG00000036036 (TF-TG) ENSMUSG00000070498	false
19888	TF-TG	ENSMUSG00000022346 (TF-TG) ENSMUSG00000038005	false
9648	TF-TG	ENSMUSG00000036036 (TF-TG) ENSMUSG00000070687	false
9647	TF-TG	ENSMUSG00000036036 (TF-TG) ENSMUSG00000070802	false
19886	TF-TG	ENSMUSG00000022346 (TF-TG) ENSMUSG00000038068	false
9646	TF-TG	ENSMUSG00000036036 (TF-TG) ENSMUSG00000070867	false
9645	TF-TG	ENSMUSG00000036036 (TF-TG) ENSMUSG00000071226	false
7596	TF-TG	ENSMUSG00000030353 (TF-TG) ENSMUSG00000046841	false
19882	TF-TG	ENSMUSG00000022346 (TF-TG) ENSMUSG00000038241	false
7592	TF-TG	ENSMUSG00000030353 (TF-TG) ENSMUSG00000047181	false
9640	TF-TG	ENSMUSG00000036036 (TF-TG) ENSMUSG00000071984	false
7591	TF-TG	ENSMUSG00000030353 (TF-TG) ENSMUSG00000047473	false
9639	TF-TG	ENSMUSG00000036036 (TF-TG) ENSMUSG00000072115	false
19878	TF-TG	ENSMUSG00000022346 (TF-TG) ENSMUSG00000038319	false
9638	TF-TG	ENSMUSG00000036036 (TF-TG) ENSMUSG00000072235	false
19877	TF-TG	ENSMUSG00000022346 (TF-TG) ENSMUSG00000038349	false
7586	TF-TG	ENSMUSG00000030353 (TF-TG) ENSMUSG00000047878	false
9634	TF-TG	ENSMUSG00000036036 (TF-TG) ENSMUSG00000072849	false
7585	TF-TG	ENSMUSG00000030353 (TF-TG) ENSMUSG00000047963	false
9632	TF-TG	ENSMUSG00000036036 (TF-TG) ENSMUSG00000073409	false
19870	TF-TG	ENSMUSG00000022346 (TF-TG) ENSMUSG00000038486	false
9628	TF-TG	ENSMUSG00000036036 (TF-TG) ENSMUSG00000074183	false
7579	TF-TG	ENSMUSG00000030353 (TF-TG) ENSMUSG00000048349	false
19866	TF-TG	ENSMUSG00000022346 (TF-TG) ENSMUSG00000038578	false
13719	TF-TG	ENSMUSG00000003545 (TF-TG) ENSMUSG00000010830	false
9622	TF-TG	ENSMUSG00000036036 (TF-TG) ENSMUSG00000074652	false
13717	TF-TG	ENSMUSG00000003545 (TF-TG) ENSMUSG00000014164	false
7573	TF-TG	ENSMUSG00000030353 (TF-TG) ENSMUSG00000048970	false
7572	TF-TG	ENSMUSG00000030353 (TF-TG) ENSMUSG00000049154	false
13715	TF-TG	ENSMUSG00000003545 (TF-TG) ENSMUSG00000014786	false
9619	TF-TG	ENSMUSG00000036036 (TF-TG) ENSMUSG00000074802	false
7570	TF-TG	ENSMUSG00000030353 (TF-TG) ENSMUSG00000049288	false
9618	TF-TG	ENSMUSG00000036036 (TF-TG) ENSMUSG00000074892	false
9617	TF-TG	ENSMUSG00000036036 (TF-TG) ENSMUSG00000075012	false
19856	TF-TG	ENSMUSG00000022346 (TF-TG) ENSMUSG00000038903	false
13712	TF-TG	ENSMUSG00000003545 (TF-TG) ENSMUSG00000019796	false
7567	TF-TG	ENSMUSG00000030353 (TF-TG) ENSMUSG00000049436	false
19852	TF-TG	ENSMUSG00000022346 (TF-TG) ENSMUSG00000039115	false
19850	TF-TG	ENSMUSG00000022346 (TF-TG) ENSMUSG00000039145	false
13705	TF-TG	ENSMUSG00000003545 (TF-TG) ENSMUSG00000021831	false
13704	TF-TG	ENSMUSG00000003545 (TF-TG) ENSMUSG00000021846	false
9608	TF-TG	ENSMUSG00000036036 (TF-TG) ENSMUSG00000078773	false
7558	TF-TG	ENSMUSG00000030353 (TF-TG) ENSMUSG00000050335	false
9606	TF-TG	ENSMUSG00000036036 (TF-TG) ENSMUSG00000078949	false
13701	TF-TG	ENSMUSG00000003545 (TF-TG) ENSMUSG00000022769	false
19844	TF-TG	ENSMUSG00000022346 (TF-TG) ENSMUSG00000039234	false
7553	TF-TG	ENSMUSG00000030353 (TF-TG) ENSMUSG00000050824	false
9601	TF-TG	ENSMUSG00000036036 (TF-TG) ENSMUSG00000079685	false
19840	TF-TG	ENSMUSG00000022346 (TF-TG) ENSMUSG00000039323	false
13696	TF-TG	ENSMUSG00000003545 (TF-TG) ENSMUSG00000024516	false
9600	TF-TG	ENSMUSG00000036036 (TF-TG) ENSMUSG00000081769	false
19839	TF-TG	ENSMUSG00000022346 (TF-TG) ENSMUSG00000039372	false
19838	TF-TG	ENSMUSG00000022346 (TF-TG) ENSMUSG00000039384	false
7550	TF-TG	ENSMUSG00000030353 (TF-TG) ENSMUSG00000051251	false
19837	TF-TG	ENSMUSG00000022346 (TF-TG) ENSMUSG00000039395	false
13693	TF-TG	ENSMUSG00000003545 (TF-TG) ENSMUSG00000025064	false
9597	TF-TG	ENSMUSG00000036036 (TF-TG) ENSMUSG00000089789	false
7547	TF-TG	ENSMUSG00000030353 (TF-TG) ENSMUSG00000051457	false
9592	TF-TG	ENSMUSG00000036036 (TF-TG) ENSMUSG00000092486	false
7541	TF-TG	ENSMUSG00000030353 (TF-TG) ENSMUSG00000052117	false
13684	TF-TG	ENSMUSG00000003545 (TF-TG) ENSMUSG00000027273	false
9588	TF-TG	ENSMUSG00000036036 (TF-TG) ENSMUSG00000096847	false
9586	TF-TG	ENSMUSG00000036036 (TF-TG) ENSMUSG00000110206	false
19824	TF-TG	ENSMUSG00000022346 (TF-TG) ENSMUSG00000039831	false
9582	TF-lincRNA	ENSMUSG00000036036 (TF-lincRNA) ENSMUSG00000103043	false
13676	TF-TG	ENSMUSG00000003545 (TF-TG) ENSMUSG00000031629	false
7532	TF-TG	ENSMUSG00000030353 (TF-TG) ENSMUSG00000053580	false
13675	TF-TG	ENSMUSG00000003545 (TF-TG) ENSMUSG00000031757	false
9579	TF-lincRNA	ENSMUSG00000036036 (TF-lincRNA) ENSMUSG00000097932	false
19818	TF-TG	ENSMUSG00000022346 (TF-TG) ENSMUSG00000040046	false
13674	TF-TG	ENSMUSG00000003545 (TF-TG) ENSMUSG00000031760	false
9578	TF-lincRNA	ENSMUSG00000036036 (TF-lincRNA) ENSMUSG00000099552	false
13673	TF-TG	ENSMUSG00000003545 (TF-TG) ENSMUSG00000031788	false
7529	TF-TG	ENSMUSG00000030353 (TF-TG) ENSMUSG00000053765	false
13672	TF-TG	ENSMUSG00000003545 (TF-TG) ENSMUSG00000031791	false
9574	TF-lincRNA	ENSMUSG00000036036 (TF-lincRNA) ENSMUSG00000097632	false
7525	TF-TG	ENSMUSG00000030353 (TF-TG) ENSMUSG00000054555	false
13666	TF-TG	ENSMUSG00000003545 (TF-TG) ENSMUSG00000033307	false
19808	TF-TG	ENSMUSG00000022346 (TF-TG) ENSMUSG00000040276	false
19807	TF-TG	ENSMUSG00000022346 (TF-TG) ENSMUSG00000040339	false
13663	TF-TG	ENSMUSG00000003545 (TF-TG) ENSMUSG00000034265	false
13661	TF-TG	ENSMUSG00000003545 (TF-TG) ENSMUSG00000034579	false
7517	TF-TG	ENSMUSG00000030353 (TF-TG) ENSMUSG00000055567	false
19803	TF-TG	ENSMUSG00000022346 (TF-TG) ENSMUSG00000040433	false
19802	TF-TG	ENSMUSG00000022346 (TF-TG) ENSMUSG00000040462	false
7514	TF-TG	ENSMUSG00000030353 (TF-TG) ENSMUSG00000055805	false
13655	TF-TG	ENSMUSG00000003545 (TF-TG) ENSMUSG00000035357	false
7511	TF-TG	ENSMUSG00000030353 (TF-TG) ENSMUSG00000056050	false
7508	TF-TG	ENSMUSG00000030353 (TF-TG) ENSMUSG00000056602	false
13649	TF-TG	ENSMUSG00000003545 (TF-TG) ENSMUSG00000037159	false
7504	TF-TG	ENSMUSG00000030353 (TF-TG) ENSMUSG00000057897	false
19790	TF-TG	ENSMUSG00000022346 (TF-TG) ENSMUSG00000040717	false
13646	TF-TG	ENSMUSG00000003545 (TF-TG) ENSMUSG00000037580	false
7498	TF-TG	ENSMUSG00000030353 (TF-TG) ENSMUSG00000059493	false
7497	TF-TG	ENSMUSG00000030353 (TF-TG) ENSMUSG00000059713	false
7495	TF-TG	ENSMUSG00000030353 (TF-TG) ENSMUSG00000059939	false
7494	TF-TG	ENSMUSG00000030353 (TF-TG) ENSMUSG00000059991	false
13637	TF-TG	ENSMUSG00000003545 (TF-TG) ENSMUSG00000039372	false
7491	TF-TG	ENSMUSG00000030353 (TF-TG) ENSMUSG00000060550	false
7488	TF-TG	ENSMUSG00000030353 (TF-TG) ENSMUSG00000061607	false
19775	TF-TG	ENSMUSG00000022346 (TF-TG) ENSMUSG00000041168	false
19773	TF-TG	ENSMUSG00000022346 (TF-TG) ENSMUSG00000041268	false
13628	TF-TG	ENSMUSG00000003545 (TF-TG) ENSMUSG00000042489	false
7483	TF-TG	ENSMUSG00000030353 (TF-TG) ENSMUSG00000062210	false
7482	TF-TG	ENSMUSG00000030353 (TF-TG) ENSMUSG00000062248	false
19769	TF-TG	ENSMUSG00000022346 (TF-TG) ENSMUSG00000041351	false
7480	TF-TG	ENSMUSG00000030353 (TF-TG) ENSMUSG00000062760	false
19766	TF-TG	ENSMUSG00000022346 (TF-TG) ENSMUSG00000041420	false
13621	TF-TG	ENSMUSG00000003545 (TF-TG) ENSMUSG00000046242	false
13617	TF-TG	ENSMUSG00000003545 (TF-TG) ENSMUSG00000048970	false
13615	TF-TG	ENSMUSG00000003545 (TF-TG) ENSMUSG00000050335	false
7469	TF-TG	ENSMUSG00000030353 (TF-TG) ENSMUSG00000065952	false
19756	TF-TG	ENSMUSG00000022346 (TF-TG) ENSMUSG00000041688	false
13609	TF-TG	ENSMUSG00000003545 (TF-TG) ENSMUSG00000053963	false
7464	TF-TG	ENSMUSG00000030353 (TF-TG) ENSMUSG00000067813	false
19751	TF-TG	ENSMUSG00000022346 (TF-TG) ENSMUSG00000041801	false
13607	TF-TG	ENSMUSG00000003545 (TF-TG) ENSMUSG00000055805	false
7462	TF-TG	ENSMUSG00000030353 (TF-TG) ENSMUSG00000068154	false
13605	TF-TG	ENSMUSG00000003545 (TF-TG) ENSMUSG00000056531	false
7460	TF-TG	ENSMUSG00000030353 (TF-TG) ENSMUSG00000068735	false
7457	TF-TG	ENSMUSG00000030353 (TF-TG) ENSMUSG00000069814	false
13599	TF-TG	ENSMUSG00000003545 (TF-TG) ENSMUSG00000059939	false
7455	TF-TG	ENSMUSG00000030353 (TF-TG) ENSMUSG00000070287	false
13598	TF-TG	ENSMUSG00000003545 (TF-TG) ENSMUSG00000059991	false
13597	TF-TG	ENSMUSG00000003545 (TF-TG) ENSMUSG00000061607	false
13596	TF-TG	ENSMUSG00000003545 (TF-TG) ENSMUSG00000062760	false
13594	TF-TG	ENSMUSG00000003545 (TF-TG) ENSMUSG00000064090	false
7450	TF-TG	ENSMUSG00000030353 (TF-TG) ENSMUSG00000070687	false
7449	TF-TG	ENSMUSG00000030353 (TF-TG) ENSMUSG00000070802	false
13592	TF-TG	ENSMUSG00000003545 (TF-TG) ENSMUSG00000067813	false
7448	TF-TG	ENSMUSG00000030353 (TF-TG) ENSMUSG00000070867	false
13590	TF-TG	ENSMUSG00000003545 (TF-TG) ENSMUSG00000070287	false
7446	TF-TG	ENSMUSG00000030353 (TF-TG) ENSMUSG00000071226	false
19732	TF-TG	ENSMUSG00000022346 (TF-TG) ENSMUSG00000042462	false
13588	TF-TG	ENSMUSG00000003545 (TF-TG) ENSMUSG00000070802	false
19731	TF-TG	ENSMUSG00000022346 (TF-TG) ENSMUSG00000042489	false
7443	TF-TG	ENSMUSG00000030353 (TF-TG) ENSMUSG00000071984	false
7442	TF-TG	ENSMUSG00000030353 (TF-TG) ENSMUSG00000072115	false
7441	TF-TG	ENSMUSG00000030353 (TF-TG) ENSMUSG00000072235	false
13584	TF-lincRNA	ENSMUSG00000003545 (TF-lincRNA) ENSMUSG00000099552	false
7435	TF-TG	ENSMUSG00000030353 (TF-TG) ENSMUSG00000073409	false
19720	TF-TG	ENSMUSG00000022346 (TF-TG) ENSMUSG00000042804	false
19719	TF-TG	ENSMUSG00000022346 (TF-TG) ENSMUSG00000042842	false
7428	TF-TG	ENSMUSG00000030353 (TF-TG) ENSMUSG00000074651	false
7427	TF-TG	ENSMUSG00000030353 (TF-TG) ENSMUSG00000074652	false
19714	TF-TG	ENSMUSG00000022346 (TF-TG) ENSMUSG00000043015	false
7424	TF-TG	ENSMUSG00000030353 (TF-TG) ENSMUSG00000074892	false
7423	TF-TG	ENSMUSG00000030353 (TF-TG) ENSMUSG00000075012	false
19710	TF-TG	ENSMUSG00000022346 (TF-TG) ENSMUSG00000043154	false
7419	TF-TG	ENSMUSG00000030353 (TF-TG) ENSMUSG00000078349	false
7416	TF-TG	ENSMUSG00000030353 (TF-TG) ENSMUSG00000078949	false
19701	TF-TG	ENSMUSG00000022346 (TF-TG) ENSMUSG00000044005	false
7408	TF-TG	ENSMUSG00000030353 (TF-TG) ENSMUSG00000079685	false
7407	TF-TG	ENSMUSG00000030353 (TF-TG) ENSMUSG00000089789	false
7404	TF-TG	ENSMUSG00000030353 (TF-TG) ENSMUSG00000094928	false
7401	TF-TG	ENSMUSG00000030353 (TF-TG) ENSMUSG00000096847	false
7399	TF-TG	ENSMUSG00000030353 (TF-TG) ENSMUSG00000098557	false
19686	TF-TG	ENSMUSG00000022346 (TF-TG) ENSMUSG00000044626	false
7398	TF-TG	ENSMUSG00000030353 (TF-TG) ENSMUSG00000110206	false
19685	TF-TG	ENSMUSG00000022346 (TF-TG) ENSMUSG00000044646	false
7395	TF-lincRNA	ENSMUSG00000030353 (TF-lincRNA) ENSMUSG00000085183	false
19680	TF-TG	ENSMUSG00000022346 (TF-TG) ENSMUSG00000045007	false
7390	TF-lincRNA	ENSMUSG00000030353 (TF-lincRNA) ENSMUSG00000097932	false
7389	TF-lincRNA	ENSMUSG00000030353 (TF-lincRNA) ENSMUSG00000097284	false
7386	TF-lincRNA	ENSMUSG00000030353 (TF-lincRNA) ENSMUSG00000097632	false
7385	TF-miRNA	ENSMUSG00000030353 (TF-miRNA) mmu-miR-1945	false
19670	TF-TG	ENSMUSG00000022346 (TF-TG) ENSMUSG00000045518	false
7382	TF-TG	ENSMUSG00000032035 (TF-TG) ENSMUSG00000000125	false
19668	TF-TG	ENSMUSG00000022346 (TF-TG) ENSMUSG00000045751	false
7379	TF-TG	ENSMUSG00000032035 (TF-TG) ENSMUSG00000000214	false
19666	TF-TG	ENSMUSG00000022346 (TF-TG) ENSMUSG00000045790	false
7378	TF-TG	ENSMUSG00000032035 (TF-TG) ENSMUSG00000000253	false
7373	TF-TG	ENSMUSG00000032035 (TF-TG) ENSMUSG00000000555	false
7372	TF-TG	ENSMUSG00000032035 (TF-TG) ENSMUSG00000000594	false
7370	TF-TG	ENSMUSG00000032035 (TF-TG) ENSMUSG00000001025	false
7369	TF-TG	ENSMUSG00000032035 (TF-TG) ENSMUSG00000001120	false
19656	TF-TG	ENSMUSG00000022346 (TF-TG) ENSMUSG00000046204	false
19654	TF-TG	ENSMUSG00000022346 (TF-TG) ENSMUSG00000046223	false
19653	TF-TG	ENSMUSG00000022346 (TF-TG) ENSMUSG00000046242	false
7363	TF-TG	ENSMUSG00000032035 (TF-TG) ENSMUSG00000001525	false
7362	TF-TG	ENSMUSG00000032035 (TF-TG) ENSMUSG00000001761	false
19649	TF-TG	ENSMUSG00000022346 (TF-TG) ENSMUSG00000046410	false
7360	TF-TG	ENSMUSG00000032035 (TF-TG) ENSMUSG00000001985	false
7359	TF-TG	ENSMUSG00000032035 (TF-TG) ENSMUSG00000002055	false
7356	TF-TG	ENSMUSG00000032035 (TF-TG) ENSMUSG00000002565	false
7354	TF-TG	ENSMUSG00000032035 (TF-TG) ENSMUSG00000002835	false
7353	TF-TG	ENSMUSG00000032035 (TF-TG) ENSMUSG00000002870	false
19637	TF-TG	ENSMUSG00000022346 (TF-TG) ENSMUSG00000046841	false
19634	TF-TG	ENSMUSG00000022346 (TF-TG) ENSMUSG00000047109	false
7346	TF-TG	ENSMUSG00000032035 (TF-TG) ENSMUSG00000003283	false
7345	TF-TG	ENSMUSG00000032035 (TF-TG) ENSMUSG00000003355	false
7344	TF-TG	ENSMUSG00000032035 (TF-TG) ENSMUSG00000003411	false
19631	TF-TG	ENSMUSG00000022346 (TF-TG) ENSMUSG00000047181	false
7342	TF-TG	ENSMUSG00000032035 (TF-TG) ENSMUSG00000003436	false
7341	TF-TG	ENSMUSG00000032035 (TF-TG) ENSMUSG00000003469	false
7339	TF-TG	ENSMUSG00000032035 (TF-TG) ENSMUSG00000003545	false
7337	TF-TG	ENSMUSG00000032035 (TF-TG) ENSMUSG00000003992	false
19623	TF-TG	ENSMUSG00000022346 (TF-TG) ENSMUSG00000047473	false
7332	TF-TG	ENSMUSG00000032035 (TF-TG) ENSMUSG00000004709	false
7331	TF-TG	ENSMUSG00000032035 (TF-TG) ENSMUSG00000004951	false
7329	TF-TG	ENSMUSG00000032035 (TF-TG) ENSMUSG00000005267	false
19613	TF-TG	ENSMUSG00000022346 (TF-TG) ENSMUSG00000047878	false
19611	TF-TG	ENSMUSG00000022346 (TF-TG) ENSMUSG00000047963	false
7320	TF-TG	ENSMUSG00000032035 (TF-TG) ENSMUSG00000006386	false
19601	TF-TG	ENSMUSG00000022346 (TF-TG) ENSMUSG00000048349	false
7305	TF-TG	ENSMUSG00000032035 (TF-TG) ENSMUSG00000007989	false
19588	TF-TG	ENSMUSG00000022346 (TF-TG) ENSMUSG00000048970	false
7300	TF-TG	ENSMUSG00000032035 (TF-TG) ENSMUSG00000009292	false
19586	TF-TG	ENSMUSG00000022346 (TF-TG) ENSMUSG00000049154	false
19585	TF-TG	ENSMUSG00000022346 (TF-TG) ENSMUSG00000049288	false
7296	TF-TG	ENSMUSG00000032035 (TF-TG) ENSMUSG00000010021	false
7295	TF-TG	ENSMUSG00000032035 (TF-TG) ENSMUSG00000010362	false
19581	TF-TG	ENSMUSG00000022346 (TF-TG) ENSMUSG00000049436	false
7293	TF-TG	ENSMUSG00000032035 (TF-TG) ENSMUSG00000010825	false
7292	TF-TG	ENSMUSG00000032035 (TF-TG) ENSMUSG00000010830	false
7287	TF-TG	ENSMUSG00000032035 (TF-TG) ENSMUSG00000013523	false
7286	TF-TG	ENSMUSG00000032035 (TF-TG) ENSMUSG00000013698	false
7285	TF-TG	ENSMUSG00000032035 (TF-TG) ENSMUSG00000013846	false
7283	TF-TG	ENSMUSG00000032035 (TF-TG) ENSMUSG00000014164	false
7281	TF-TG	ENSMUSG00000032035 (TF-TG) ENSMUSG00000014786	false
19567	TF-TG	ENSMUSG00000022346 (TF-TG) ENSMUSG00000050335	false
7277	TF-TG	ENSMUSG00000032035 (TF-TG) ENSMUSG00000015468	false
19555	TF-TG	ENSMUSG00000022346 (TF-TG) ENSMUSG00000050824	false
7266	TF-TG	ENSMUSG00000032035 (TF-TG) ENSMUSG00000017493	false
7265	TF-TG	ENSMUSG00000032035 (TF-TG) ENSMUSG00000017499	false
7263	TF-TG	ENSMUSG00000032035 (TF-TG) ENSMUSG00000017607	false
19547	TF-TG	ENSMUSG00000022346 (TF-TG) ENSMUSG00000051251	false
7259	TF-TG	ENSMUSG00000032035 (TF-TG) ENSMUSG00000017716	false
19546	TF-TG	ENSMUSG00000022346 (TF-TG) ENSMUSG00000051314	false
19543	TF-TG	ENSMUSG00000022346 (TF-TG) ENSMUSG00000051457	false
7250	TF-TG	ENSMUSG00000032035 (TF-TG) ENSMUSG00000018672	false
19535	TF-TG	ENSMUSG00000022346 (TF-TG) ENSMUSG00000052117	false
7242	TF-TG	ENSMUSG00000032035 (TF-TG) ENSMUSG00000019235	false
19528	TF-TG	ENSMUSG00000022346 (TF-TG) ENSMUSG00000052384	false
7240	TF-TG	ENSMUSG00000032035 (TF-TG) ENSMUSG00000019303	false
19525	TF-TG	ENSMUSG00000022346 (TF-TG) ENSMUSG00000052921	false
7236	TF-TG	ENSMUSG00000032035 (TF-TG) ENSMUSG00000019796	false
7230	TF-TG	ENSMUSG00000032035 (TF-TG) ENSMUSG00000019945	false
19514	TF-TG	ENSMUSG00000022346 (TF-TG) ENSMUSG00000053414	false
7226	TF-TG	ENSMUSG00000032035 (TF-TG) ENSMUSG00000019992	false
19512	TF-TG	ENSMUSG00000022346 (TF-TG) ENSMUSG00000053580	false
19508	TF-TG	ENSMUSG00000022346 (TF-TG) ENSMUSG00000053765	false
19505	TF-TG	ENSMUSG00000022346 (TF-TG) ENSMUSG00000053963	false
7217	TF-TG	ENSMUSG00000032035 (TF-TG) ENSMUSG00000020151	false
7211	TF-TG	ENSMUSG00000032035 (TF-TG) ENSMUSG00000020226	false
19498	TF-TG	ENSMUSG00000022346 (TF-TG) ENSMUSG00000054555	false
19497	TF-TG	ENSMUSG00000022346 (TF-TG) ENSMUSG00000054582	false
19495	TF-TG	ENSMUSG00000022346 (TF-TG) ENSMUSG00000054630	false
7201	TF-TG	ENSMUSG00000032035 (TF-TG) ENSMUSG00000020462	false
7199	TF-TG	ENSMUSG00000032035 (TF-TG) ENSMUSG00000020471	false
7194	TF-TG	ENSMUSG00000032035 (TF-TG) ENSMUSG00000020649	false
19481	TF-TG	ENSMUSG00000022346 (TF-TG) ENSMUSG00000055567	false
19475	TF-TG	ENSMUSG00000022346 (TF-TG) ENSMUSG00000055805	false
7185	TF-TG	ENSMUSG00000032035 (TF-TG) ENSMUSG00000020788	false
