# Supplementary material for: Regulatory network analysis of Paneth cell and goblet cell enriched gut organoids using transcriptomics approaches
Source: Royal Society of Chemistry journal article supplement (doi:10.1039/c9mo00130a), 2019-12-10
Supplement: c9mo00130a2.cys [file c9mo00130a2.cys › CytoscapeSession-2019_09_26-21_57/tables/21381-1%3A+Cluster+1+%28Score%3A+8.022%29/LOCAL_ATTRS-org.cytoscape.model.CyNode-1%3A+Cluster+1+%28Score%3A+8.022%29+default+node.cytable]

CyCSV-Version	1
SUID	name	selected
java.lang.Long	java.lang.String	java.lang.Boolean
1: Cluster 1 (Score: 8.022) default node
1693	ENSMUSG00000074802	false
1692	ENSMUSG00000074892	false
1177	ENSMUSG00000024175	false
664	ENSMUSG00000046204	false
1175	ENSMUSG00000025876	false
1174	ENSMUSG00000029420	false
1686	ENSMUSG00000078773	false
1172	ENSMUSG00000031790	false
1681	ENSMUSG00000094928	false
1680	ENSMUSG00000096847	false
655	ENSMUSG00000046841	false
1677	ENSMUSG00000110206	false
653	ENSMUSG00000047473	false
2188	ENSMUSG00000022346	false
1675	ENSMUSG00000000214	false
650	ENSMUSG00000047963	false
1160	ENSMUSG00000049154	false
1158	ENSMUSG00000058070	false
1154	ENSMUSG00000000125	false
1153	ENSMUSG00000002055	false
1661	ENSMUSG00000010830	false
1660	ENSMUSG00000014164	false
2170	ENSMUSG00000017499	false
1146	ENSMUSG00000028693	false
1143	ENSMUSG00000034818	false
1652	ENSMUSG00000021846	false
1140	ENSMUSG00000040046	false
627	ENSMUSG00000050824	false
1138	ENSMUSG00000041168	false
1649	ENSMUSG00000022769	false
1135	ENSMUSG00000054582	false
1134	ENSMUSG00000063810	false
622	ENSMUSG00000051251	false
621	ENSMUSG00000051314	false
1644	ENSMUSG00000025064	false
2154	ENSMUSG00000026398	false
1126	ENSMUSG00000000253	false
2150	ENSMUSG00000000594	false
2149	ENSMUSG00000001120	false
1636	ENSMUSG00000027273	false
612	ENSMUSG00000052921	false
2145	ENSMUSG00000002565	false
2144	ENSMUSG00000002835	false
2143	ENSMUSG00000002870	false
1630	ENSMUSG00000031757	false
1118	ENSMUSG00000001525	false
1629	ENSMUSG00000031760	false
1628	ENSMUSG00000031788	false
604	ENSMUSG00000053765	false
1627	ENSMUSG00000031791	false
2137	ENSMUSG00000003545	false
2136	ENSMUSG00000003992	false
599	ENSMUSG00000054555	false
1622	ENSMUSG00000033307	false
2134	ENSMUSG00000005267	false
1110	ENSMUSG00000003355	false
598	ENSMUSG00000054630	false
1109	ENSMUSG00000003411	false
1618	ENSMUSG00000034579	false
591	ENSMUSG00000055567	false
1102	ENSMUSG00000006386	false
1613	ENSMUSG00000035357	false
2124	ENSMUSG00000009292	false
2122	ENSMUSG00000010362	false
1609	ENSMUSG00000037580	false
2119	ENSMUSG00000014786	false
580	ENSMUSG00000056050	false
1603	ENSMUSG00000039372	false
2112	ENSMUSG00000017493	false
2110	ENSMUSG00000017716	false
1594	ENSMUSG00000046242	false
570	ENSMUSG00000057897	false
1081	ENSMUSG00000017607	false
2105	ENSMUSG00000019303	false
2102	ENSMUSG00000019796	false
1590	ENSMUSG00000048970	false
563	ENSMUSG00000059493	false
1074	ENSMUSG00000018554	false
1584	ENSMUSG00000053963	false
1072	ENSMUSG00000018672	false
1582	ENSMUSG00000056531	false
2093	ENSMUSG00000020471	false
1069	ENSMUSG00000019235	false
1068	ENSMUSG00000019775	false
554	ENSMUSG00000062210	false
1578	ENSMUSG00000059991	false
2089	ENSMUSG00000020649	false
1576	ENSMUSG00000064090	false
1063	ENSMUSG00000019945	false
2085	ENSMUSG00000020788	false
1061	ENSMUSG00000019992	false
1573	ENSMUSG00000070287	false
2083	ENSMUSG00000020846	false
1056	ENSMUSG00000020151	false
2080	ENSMUSG00000020901	false
1567	ENSMUSG00000025938	false
1566	ENSMUSG00000025969	false
1565	ENSMUSG00000026833	false
2075	ENSMUSG00000021391	false
1047	ENSMUSG00000020462	false
2070	ENSMUSG00000021831	false
534	ENSMUSG00000068154	false
1045	ENSMUSG00000020571	false
2069	ENSMUSG00000021876	false
2068	ENSMUSG00000022003	false
2065	ENSMUSG00000022148	false
1553	ENSMUSG00000028927	false
2063	ENSMUSG00000022253	false
1037	ENSMUSG00000020900	false
525	ENSMUSG00000070687	false
524	ENSMUSG00000071226	false
1034	ENSMUSG00000021136	false
519	ENSMUSG00000071984	false
2055	ENSMUSG00000022762	false
2052	ENSMUSG00000022912	false
1540	ENSMUSG00000069227	false
1539	ENSMUSG00000069814	false
1027	ENSMUSG00000021572	false
2051	ENSMUSG00000022945	false
515	ENSMUSG00000072849	false
1538	ENSMUSG00000074183	false
1535	ENSMUSG00000001025	false
1534	ENSMUSG00000003283	false
1022	ENSMUSG00000021838	false
1533	ENSMUSG00000003436	false
1020	ENSMUSG00000021986	false
1532	ENSMUSG00000004951	false
2042	ENSMUSG00000023272	false
506	ENSMUSG00000074651	false
1529	ENSMUSG00000007989	false
1528	ENSMUSG00000013846	false
1016	ENSMUSG00000022211	false
2039	ENSMUSG00000024193	false
502	ENSMUSG00000075012	false
2037	ENSMUSG00000024299	false
2035	ENSMUSG00000024516	false
1521	ENSMUSG00000020226	false
1008	ENSMUSG00000022773	false
1517	ENSMUSG00000022021	false
2028	ENSMUSG00000024777	false
1003	ENSMUSG00000023066	false
1515	ENSMUSG00000022840	false
1514	ENSMUSG00000022881	false
489	ENSMUSG00000081769	false
1001	ENSMUSG00000023247	false
2025	ENSMUSG00000024891	false
2023	ENSMUSG00000024989	false
999	ENSMUSG00000023886	false
2022	ENSMUSG00000025001	false
1510	ENSMUSG00000024423	false
2019	ENSMUSG00000025351	false
481	ENSMUSG00000095567	false
1504	ENSMUSG00000025742	false
1502	ENSMUSG00000026355	false
1501	ENSMUSG00000026380	false
1498	ENSMUSG00000026669	false
2009	ENSMUSG00000026504	false
2007	ENSMUSG00000026546	false
982	ENSMUSG00000024512	false
2005	ENSMUSG00000026683	false
1493	ENSMUSG00000027420	false
1492	ENSMUSG00000027435	false
1489	ENSMUSG00000027661	false
977	ENSMUSG00000024912	false
1487	ENSMUSG00000028763	false
1998	ENSMUSG00000027006	false
1486	ENSMUSG00000028825	false
1484	ENSMUSG00000028949	false
972	ENSMUSG00000025075	false
1996	ENSMUSG00000027075	false
1995	ENSMUSG00000027230	false
1479	ENSMUSG00000030659	false
1987	ENSMUSG00000027533	false
1986	ENSMUSG00000027611	false
1474	ENSMUSG00000031730	false
1982	ENSMUSG00000027834	false
957	ENSMUSG00000025608	false
1978	ENSMUSG00000028282	false
1977	ENSMUSG00000028312	false
1465	ENSMUSG00000033970	false
1463	ENSMUSG00000034768	false
1972	ENSMUSG00000028602	false
947	ENSMUSG00000026303	false
1458	ENSMUSG00000035849	false
1969	ENSMUSG00000028634	false
1455	ENSMUSG00000036223	false
1966	ENSMUSG00000028699	false
940	ENSMUSG00000026483	false
1450	ENSMUSG00000039323	false
1961	ENSMUSG00000028909	false
1449	ENSMUSG00000039395	false
1957	ENSMUSG00000029312	false
1956	ENSMUSG00000029343	false
1955	ENSMUSG00000029408	false
1438	ENSMUSG00000045007	false
1436	ENSMUSG00000045751	false
924	ENSMUSG00000027635	false
1946	ENSMUSG00000029875	false
1434	ENSMUSG00000047878	false
1945	ENSMUSG00000029910	false
920	ENSMUSG00000027797	false
1943	ENSMUSG00000030107	false
1942	ENSMUSG00000030199	false
915	ENSMUSG00000028039	false
1421	ENSMUSG00000060671	false
1419	ENSMUSG00000064267	false
907	ENSMUSG00000028356	false
1929	ENSMUSG00000031629	false
1416	ENSMUSG00000068735	false
1928	ENSMUSG00000031668	false
904	ENSMUSG00000028415	false
900	ENSMUSG00000028532	false
898	ENSMUSG00000028555	false
1408	ENSMUSG00000078349	false
1407	ENSMUSG00000078949	false
1918	ENSMUSG00000032350	false
1406	ENSMUSG00000079038	false
1404	ENSMUSG00000079685	false
1915	ENSMUSG00000032531	false
1403	ENSMUSG00000089789	false
1401	ENSMUSG00000092486	false
1399	ENSMUSG00000098557	false
1908	ENSMUSG00000032902	false
1395	ENSMUSG00000001985	false
1393	ENSMUSG00000010021	false
1390	ENSMUSG00000021061	false
1387	ENSMUSG00000022489	false
1385	ENSMUSG00000024366	false
1384	ENSMUSG00000024533	false
1895	ENSMUSG00000034265	false
868	ENSMUSG00000030137	false
1379	ENSMUSG00000028986	false
867	ENSMUSG00000030287	false
865	ENSMUSG00000030353	false
1888	ENSMUSG00000035273	false
1374	ENSMUSG00000032773	false
861	ENSMUSG00000030772	false
1369	ENSMUSG00000045518	false
1880	ENSMUSG00000036256	false
1368	ENSMUSG00000048349	false
1876	ENSMUSG00000036863	false
1873	ENSMUSG00000037159	false
1361	ENSMUSG00000068196	false
1359	ENSMUSG00000070867	false
1358	ENSMUSG00000074652	false
1356	ENSMUSG00000015468	false
842	ENSMUSG00000031844	false
1865	ENSMUSG00000037643	false
1352	ENSMUSG00000000555	false
1864	ENSMUSG00000037820	false
1350	ENSMUSG00000001761	false
1862	ENSMUSG00000038005	false
838	ENSMUSG00000031981	false
1860	ENSMUSG00000038068	false
1347	ENSMUSG00000003469	false
1858	ENSMUSG00000038241	false
834	ENSMUSG00000032035	false
1857	ENSMUSG00000038319	false
1345	ENSMUSG00000004709	false
833	ENSMUSG00000032092	false
830	ENSMUSG00000032232	false
1853	ENSMUSG00000038578	false
1340	ENSMUSG00000009108	false
1337	ENSMUSG00000013523	false
1848	ENSMUSG00000039115	false
1336	ENSMUSG00000013698	false
1846	ENSMUSG00000039145	false
1333	ENSMUSG00000016200	false
819	ENSMUSG00000032532	false
1842	ENSMUSG00000039234	false
1840	ENSMUSG00000039384	false
813	ENSMUSG00000033032	false
1323	ENSMUSG00000021396	false
1830	ENSMUSG00000040276	false
1829	ENSMUSG00000040339	false
1828	ENSMUSG00000040462	false
804	ENSMUSG00000033825	false
1315	ENSMUSG00000024613	false
801	ENSMUSG00000034118	false
796	ENSMUSG00000034656	false
1303	ENSMUSG00000026646	false
1301	ENSMUSG00000026700	false
1813	ENSMUSG00000042462	false
1812	ENSMUSG00000042489	false
787	ENSMUSG00000035683	false
1807	ENSMUSG00000043154	false
1295	ENSMUSG00000027931	false
1805	ENSMUSG00000044005	false
1291	ENSMUSG00000028403	false
1287	ENSMUSG00000029154	false
773	ENSMUSG00000036944	false
1795	ENSMUSG00000046223	false
1281	ENSMUSG00000030329	false
256	ENSMUSG00000085183	false
255	ENSMUSG00000103043	false
1789	ENSMUSG00000047109	false
253	ENSMUSG00000097561	false
764	ENSMUSG00000037509	false
1269	ENSMUSG00000035164	false
245	ENSMUSG00000097932	false
244	ENSMUSG00000099552	false
243	ENSMUSG00000097284	false
1267	ENSMUSG00000036036	false
1266	ENSMUSG00000036745	false
1265	ENSMUSG00000036777	false
1264	ENSMUSG00000036887	false
750	ENSMUSG00000038349	false
1771	ENSMUSG00000049288	false
746	ENSMUSG00000038903	false
1257	ENSMUSG00000038486	false
1765	ENSMUSG00000050335	false
229	ENSMUSG00000097632	false
737	ENSMUSG00000039831	false
1760	ENSMUSG00000051457	false
1248	ENSMUSG00000040717	false
1247	ENSMUSG00000041202	false
1757	ENSMUSG00000052117	false
221	mmu-miR-1945	false
1754	ENSMUSG00000052384	false
728	ENSMUSG00000040433	false
1751	ENSMUSG00000053414	false
1749	ENSMUSG00000053580	false
1232	ENSMUSG00000046410	false
719	ENSMUSG00000041268	false
1229	ENSMUSG00000047181	false
716	ENSMUSG00000041351	false
1739	ENSMUSG00000055805	false
714	ENSMUSG00000041420	false
1736	ENSMUSG00000056602	false
1735	ENSMUSG00000056888	false
1734	ENSMUSG00000057069	false
1733	ENSMUSG00000057137	false
709	ENSMUSG00000041688	false
1220	ENSMUSG00000049436	false
1731	ENSMUSG00000058006	false
705	ENSMUSG00000041801	false
1723	ENSMUSG00000059713	false
1722	ENSMUSG00000059939	false
1720	ENSMUSG00000060550	false
1718	ENSMUSG00000061607	false
691	ENSMUSG00000042804	false
1714	ENSMUSG00000062248	false
1202	ENSMUSG00000065952	false
690	ENSMUSG00000042842	false
1713	ENSMUSG00000062760	false
688	ENSMUSG00000043015	false
1710	ENSMUSG00000067813	false
1709	ENSMUSG00000069910	false
1195	ENSMUSG00000069805	false
1707	ENSMUSG00000070498	false
1704	ENSMUSG00000070802	false
679	ENSMUSG00000044626	false
1702	ENSMUSG00000072115	false
678	ENSMUSG00000044646	false
1189	ENSMUSG00000074896	false
1701	ENSMUSG00000072235	false
1700	ENSMUSG00000073409	false
671	ENSMUSG00000045790	false
1182	ENSMUSG00000010825	false
