# Supplementary material for: Regulatory network analysis of Paneth cell and goblet cell enriched gut organoids using transcriptomics approaches
Source: Royal Society of Chemistry journal article supplement (doi:10.1039/c9mo00130a), 2019-12-10
Supplement: c9mo00130a2.cys [file c9mo00130a2.cys › CytoscapeSession-2019_09_26-21_57/tables/21391-1%3A+Cluster+2+%28Score%3A+7.429%29/LOCAL_ATTRS-org.cytoscape.model.CyEdge-1%3A+Cluster+2+%28Score%3A+7.429%29+default+edge.cytable]

CyCSV-Version	1
SUID	interaction	name	selected
java.lang.Long	java.lang.String	java.lang.String	java.lang.Boolean
1: Cluster 2 (Score: 7.429) default edge
13199	TF-TG	ENSMUSG00000025912 (TF-TG) ENSMUSG00000054893	false
21261	TF-TG	ENSMUSG00000018899 (TF-TG) ENSMUSG00000021453	false
13324	TF-TG	ENSMUSG00000025912 (TF-TG) ENSMUSG00000028212	false
21002	TF-TG	ENSMUSG00000018899 (TF-TG) ENSMUSG00000044066	false
18186	TF-TG	ENSMUSG00000022479 (TF-TG) ENSMUSG00000027490	false
18825	TF-TG	ENSMUSG00000027490 (TF-TG) ENSMUSG00000043439	false
18821	TF-TG	ENSMUSG00000027490 (TF-TG) ENSMUSG00000044066	false
16901	TF-TG	ENSMUSG00000024431 (TF-TG) ENSMUSG00000022479	false
16004	TF-TG	ENSMUSG00000024431 (TF-TG) ENSMUSG00000043439	false
15619	TF-TG	ENSMUSG00000024431 (TF-TG) ENSMUSG00000069255	false
16642	TF-TG	ENSMUSG00000024431 (TF-TG) ENSMUSG00000027490	false
18175	TF-TG	ENSMUSG00000022479 (TF-TG) ENSMUSG00000027641	false
21245	TF-TG	ENSMUSG00000018899 (TF-TG) ENSMUSG00000022479	false
15995	TF-TG	ENSMUSG00000024431 (TF-TG) ENSMUSG00000044066	false
17656	TF-TG	ENSMUSG00000022479 (TF-TG) ENSMUSG00000043439	false
17528	TF-TG	ENSMUSG00000022479 (TF-TG) ENSMUSG00000051335	false
15607	TF-TG	ENSMUSG00000024431 (TF-TG) ENSMUSG00000070348	false
13175	TF-TG	ENSMUSG00000025912 (TF-TG) ENSMUSG00000069255	false
16629	TF-TG	ENSMUSG00000024431 (TF-TG) ENSMUSG00000027641	false
13172	TF-TG	ENSMUSG00000025912 (TF-TG) ENSMUSG00000070348	false
17649	TF-TG	ENSMUSG00000022479 (TF-TG) ENSMUSG00000044066	false
18544	TF-TG	ENSMUSG00000022479 (TF-TG) ENSMUSG00000018899	false
17520	TF-TG	ENSMUSG00000022479 (TF-TG) ENSMUSG00000052085	false
19183	TF-TG	ENSMUSG00000027490 (TF-TG) ENSMUSG00000027641	false
13166	TF-TG	ENSMUSG00000025912 (TF-TG) ENSMUSG00000074063	false
18925	TF-TG	ENSMUSG00000027490 (TF-TG) ENSMUSG00000031987	false
21224	TF-TG	ENSMUSG00000018899 (TF-TG) ENSMUSG00000024431	false
18151	TF-TG	ENSMUSG00000022479 (TF-TG) ENSMUSG00000028212	false
19045	TF-TG	ENSMUSG00000027490 (TF-TG) ENSMUSG00000024232	false
18276	TF-TG	ENSMUSG00000022479 (TF-TG) ENSMUSG00000025810	false
19043	TF-TG	ENSMUSG00000027490 (TF-TG) ENSMUSG00000024431	false
16739	TF-TG	ENSMUSG00000024431 (TF-TG) ENSMUSG00000025810	false
18274	TF-TG	ENSMUSG00000022479 (TF-TG) ENSMUSG00000025912	false
21345	TF-TG	ENSMUSG00000018899 (TF-TG) ENSMUSG00000003032	false
16736	TF-TG	ENSMUSG00000024431 (TF-TG) ENSMUSG00000025912	false
18654	TF-TG	ENSMUSG00000022479 (TF-TG) ENSMUSG00000003032	false
18781	TF-TG	ENSMUSG00000027490 (TF-TG) ENSMUSG00000051335	false
17115	TF-TG	ENSMUSG00000024431 (TF-TG) ENSMUSG00000011148	false
16601	TF-TG	ENSMUSG00000024431 (TF-TG) ENSMUSG00000028212	false
20952	TF-TG	ENSMUSG00000018899 (TF-TG) ENSMUSG00000051335	false
15832	TF-TG	ENSMUSG00000024431 (TF-TG) ENSMUSG00000051335	false
20948	TF-TG	ENSMUSG00000018899 (TF-TG) ENSMUSG00000052085	false
18003	TF-TG	ENSMUSG00000022479 (TF-TG) ENSMUSG00000031987	false
21201	TF-TG	ENSMUSG00000018899 (TF-TG) ENSMUSG00000025810	false
18769	TF-TG	ENSMUSG00000027490 (TF-TG) ENSMUSG00000054893	false
17361	TF-TG	ENSMUSG00000022479 (TF-TG) ENSMUSG00000069255	false
21200	TF-TG	ENSMUSG00000018899 (TF-TG) ENSMUSG00000025912	false
19023	TF-TG	ENSMUSG00000027490 (TF-TG) ENSMUSG00000025810	false
15822	TF-TG	ENSMUSG00000024431 (TF-TG) ENSMUSG00000052085	false
19021	TF-TG	ENSMUSG00000027490 (TF-TG) ENSMUSG00000025912	false
15564	TF-TG	ENSMUSG00000024431 (TF-TG) ENSMUSG00000074063	false
16074	TF-TG	ENSMUSG00000024431 (TF-TG) ENSMUSG00000041075	false
20937	TF-TG	ENSMUSG00000018899 (TF-TG) ENSMUSG00000054893	false
17352	TF-TG	ENSMUSG00000022479 (TF-TG) ENSMUSG00000070348	false
21318	TF-TG	ENSMUSG00000018899 (TF-TG) ENSMUSG00000011148	false
17476	TF-TG	ENSMUSG00000022479 (TF-TG) ENSMUSG00000054893	false
16832	TF-TG	ENSMUSG00000024431 (TF-TG) ENSMUSG00000024232	false
19129	TF-TG	ENSMUSG00000027490 (TF-TG) ENSMUSG00000018899	false
17718	TF-TG	ENSMUSG00000022479 (TF-TG) ENSMUSG00000041075	false
18357	TF-TG	ENSMUSG00000022479 (TF-TG) ENSMUSG00000024232	false
13236	TF-TG	ENSMUSG00000025912 (TF-TG) ENSMUSG00000041075	false
16945	TF-TG	ENSMUSG00000024431 (TF-TG) ENSMUSG00000021453	false
21167	TF-TG	ENSMUSG00000018899 (TF-TG) ENSMUSG00000027490	false
13229	TF-TG	ENSMUSG00000025912 (TF-TG) ENSMUSG00000043439	false
21164	TF-TG	ENSMUSG00000018899 (TF-TG) ENSMUSG00000027641	false
18347	TF-TG	ENSMUSG00000022479 (TF-TG) ENSMUSG00000024431	false
17321	TF-TG	ENSMUSG00000022479 (TF-TG) ENSMUSG00000074063	false
18727	TF-TG	ENSMUSG00000027490 (TF-TG) ENSMUSG00000069255	false
20902	TF-TG	ENSMUSG00000018899 (TF-TG) ENSMUSG00000069255	false
18724	TF-TG	ENSMUSG00000027490 (TF-TG) ENSMUSG00000070348	false
20897	TF-TG	ENSMUSG00000018899 (TF-TG) ENSMUSG00000070348	false
18593	TF-TG	ENSMUSG00000022479 (TF-TG) ENSMUSG00000011148	false
17184	TF-TG	ENSMUSG00000024431 (TF-TG) ENSMUSG00000003032	false
17056	TF-TG	ENSMUSG00000024431 (TF-TG) ENSMUSG00000018899	false
18974	TF-TG	ENSMUSG00000027490 (TF-TG) ENSMUSG00000028212	false
21021	TF-TG	ENSMUSG00000018899 (TF-TG) ENSMUSG00000041075	false
15772	TF-TG	ENSMUSG00000024431 (TF-TG) ENSMUSG00000054893	false
18714	TF-TG	ENSMUSG00000027490 (TF-TG) ENSMUSG00000074063	false
16410	TF-TG	ENSMUSG00000024431 (TF-TG) ENSMUSG00000031987	false
18840	TF-TG	ENSMUSG00000027490 (TF-TG) ENSMUSG00000041075	false
20886	TF-TG	ENSMUSG00000018899 (TF-TG) ENSMUSG00000074063	false
18454	TF-TG	ENSMUSG00000022479 (TF-TG) ENSMUSG00000021453	false
19093	TF-TG	ENSMUSG00000027490 (TF-TG) ENSMUSG00000021453	false
