# Supplementary material for: Regulatory network analysis of Paneth cell and goblet cell enriched gut organoids using transcriptomics approaches
Source: Royal Society of Chemistry journal article supplement (doi:10.1039/c9mo00130a), 2019-12-10
Supplement: c9mo00130a2.cys [file c9mo00130a2.cys › CytoscapeSession-2019_09_26-21_57/tables/21391-1%3A+Cluster+2+%28Score%3A+7.429%29/LOCAL_ATTRS-org.cytoscape.model.CyNode-1%3A+Cluster+2+%28Score%3A+7.429%29+default+node.cytable]

CyCSV-Version	1
SUID	name	selected
java.lang.Long	java.lang.String	java.lang.Boolean
1: Cluster 2 (Score: 7.429) default node
2140	ENSMUSG00000003032	false
1979	ENSMUSG00000028212	false
1819	ENSMUSG00000041075	false
1307	ENSMUSG00000025810	false
2074	ENSMUSG00000021453	false
2038	ENSMUSG00000024232	false
2166	ENSMUSG00000027641	false
1360	ENSMUSG00000069255	false
1743	ENSMUSG00000054893	false
1806	ENSMUSG00000043439	false
2190	ENSMUSG00000018899	false
1804	ENSMUSG00000044066	false
2186	ENSMUSG00000027490	false
2121	ENSMUSG00000011148	false
2185	ENSMUSG00000022479	false
2182	ENSMUSG00000024431	false
1925	ENSMUSG00000031987	false
1699	ENSMUSG00000074063	false
1761	ENSMUSG00000051335	false
1759	ENSMUSG00000052085	false
2174	ENSMUSG00000070348	false
2014	ENSMUSG00000025912	false
