# Supplementary material for: Regulatory network analysis of Paneth cell and goblet cell enriched gut organoids using transcriptomics approaches
Source: Royal Society of Chemistry journal article supplement (doi:10.1039/c9mo00130a), 2019-12-10
Supplement: c9mo00130a2.cys [file c9mo00130a2.cys › CytoscapeSession-2019_09_26-21_57/tables/21401-1%3A+Cluster+4+%28Score%3A+3.714%29/LOCAL_ATTRS-org.cytoscape.model.CyEdge-1%3A+Cluster+4+%28Score%3A+3.714%29+default+edge.cytable]

CyCSV-Version	1
SUID	interaction	name	selected
java.lang.Long	java.lang.String	java.lang.String	java.lang.Boolean
1: Cluster 4 (Score: 3.714) default edge
5326	TF-TG	ENSMUSG00000038692 (TF-TG) ENSMUSG00000027750	false
8525	TF-TG	ENSMUSG00000035451 (TF-TG) ENSMUSG00000047115	false
8717	TF-TG	ENSMUSG00000035451 (TF-TG) ENSMUSG00000027750	false
5446	TF-TG	ENSMUSG00000038692 (TF-TG) ENSMUSG00000020261	false
5441	TF-TG	ENSMUSG00000038692 (TF-TG) ENSMUSG00000020573	false
5184	TF-TG	ENSMUSG00000038692 (TF-TG) ENSMUSG00000042041	false
5439	TF-TG	ENSMUSG00000038692 (TF-TG) ENSMUSG00000020581	false
8510	TF-TG	ENSMUSG00000035451 (TF-TG) ENSMUSG00000050064	false
8445	TF-TG	ENSMUSG00000035451 (TF-TG) ENSMUSG00000066324	false
8824	TF-TG	ENSMUSG00000035451 (TF-TG) ENSMUSG00000020261	false
5174	TF-TG	ENSMUSG00000038692 (TF-TG) ENSMUSG00000044288	false
5109	TF-TG	ENSMUSG00000038692 (TF-TG) ENSMUSG00000055978	false
5236	TF-TG	ENSMUSG00000038692 (TF-TG) ENSMUSG00000036181	false
8820	TF-TG	ENSMUSG00000035451 (TF-TG) ENSMUSG00000020573	false
5362	TF-TG	ENSMUSG00000038692 (TF-TG) ENSMUSG00000026072	false
5426	TF-TG	ENSMUSG00000038692 (TF-TG) ENSMUSG00000021720	false
8818	TF-TG	ENSMUSG00000035451 (TF-TG) ENSMUSG00000020581	false
8561	TF-TG	ENSMUSG00000035451 (TF-TG) ENSMUSG00000042041	false
8621	TF-TG	ENSMUSG00000035451 (TF-TG) ENSMUSG00000036181	false
8748	TF-TG	ENSMUSG00000035451 (TF-TG) ENSMUSG00000026072	false
5155	TF-TG	ENSMUSG00000038692 (TF-TG) ENSMUSG00000047115	false
8547	TF-TG	ENSMUSG00000035451 (TF-TG) ENSMUSG00000044288	false
8803	TF-TG	ENSMUSG00000035451 (TF-TG) ENSMUSG00000021720	false
8478	TF-TG	ENSMUSG00000035451 (TF-TG) ENSMUSG00000055978	false
5084	TF-TG	ENSMUSG00000038692 (TF-TG) ENSMUSG00000066324	false
5141	TF-TG	ENSMUSG00000038692 (TF-TG) ENSMUSG00000050064	false
