# Supplementary material for: Regulatory network analysis of Paneth cell and goblet cell enriched gut organoids using transcriptomics approaches
Source: Royal Society of Chemistry journal article supplement (doi:10.1039/c9mo00130a), 2019-12-10
Supplement: c9mo00130a2.cys [file c9mo00130a2.cys › CytoscapeSession-2019_09_26-21_57/tables/21401-1%3A+Cluster+4+%28Score%3A+3.714%29/LOCAL_ATTRS-org.cytoscape.model.CyNode-1%3A+Cluster+4+%28Score%3A+3.714%29+default+node.cytable]

CyCSV-Version	1
SUID	name	selected
java.lang.Long	java.lang.String	java.lang.Boolean
1: Cluster 4 (Score: 3.714) default node
1788	ENSMUSG00000047115	false
1371	ENSMUSG00000044288	false
1881	ENSMUSG00000036181	false
1305	ENSMUSG00000026072	false
1201	ENSMUSG00000066324	false
1297	ENSMUSG00000027750	false
1327	ENSMUSG00000020581	false
2094	ENSMUSG00000020261	false
747	ENSMUSG00000038692	false
2091	ENSMUSG00000020573	false
1129	ENSMUSG00000035451	false
1321	ENSMUSG00000021720	false
583	ENSMUSG00000055978	false
1217	ENSMUSG00000050064	false
702	ENSMUSG00000042041	false
