# Supplementary material for: Regulatory network analysis of Paneth cell and goblet cell enriched gut organoids using transcriptomics approaches
Source: Royal Society of Chemistry journal article supplement (doi:10.1039/c9mo00130a), 2019-12-10
Supplement: c9mo00130a2.cys [file c9mo00130a2.cys › CytoscapeSession-2019_09_26-21_57/tables/21411-1%3A+Cluster+5+%28Score%3A+3.333%29/LOCAL_ATTRS-org.cytoscape.model.CyEdge-1%3A+Cluster+5+%28Score%3A+3.333%29+default+edge.cytable]

"CyCSV-Version","1"
"SUID","interaction","name","selected"
"java.lang.Long","java.lang.String","java.lang.String","java.lang.Boolean"
"","","",""
"1: Cluster 5 (Score: 3.333) default edge",""
"14000","TF-TG","ENSMUSG00000000782 (TF-TG) ENSMUSG00000031617","false"
"13854","TF-TG","ENSMUSG00000000782 (TF-TG) ENSMUSG00000047221","false"
"3997","TF-TG","ENSMUSG00000027434 (TF-TG) ENSMUSG00000048450","false"
"4202","TF-TG","ENSMUSG00000027434 (TF-TG) ENSMUSG00000001403","false"
"14233","TF-TG","ENSMUSG00000000782 (TF-TG) ENSMUSG00000001403","false"
"4089","TF-TG","ENSMUSG00000027434 (TF-TG) ENSMUSG00000031617","false"
"4165","TF-TG","ENSMUSG00000027434 (TF-TG) ENSMUSG00000020873","false"
"13843","TF-TG","ENSMUSG00000000782 (TF-TG) ENSMUSG00000048450","false"
"4003","TF-TG","ENSMUSG00000027434 (TF-TG) ENSMUSG00000047221","false"
"14162","TF-TG","ENSMUSG00000000782 (TF-TG) ENSMUSG00000020873","false"
