# Supplementary material for: Regulatory network analysis of Paneth cell and goblet cell enriched gut organoids using transcriptomics approaches
Source: Royal Society of Chemistry journal article supplement (doi:10.1039/c9mo00130a), 2019-12-10
Supplement: c9mo00130a2.cys [file c9mo00130a2.cys › CytoscapeSession-2019_09_26-21_57/tables/21411-1%3A+Cluster+5+%28Score%3A+3.333%29/LOCAL_ATTRS-org.cytoscape.model.CyNode-1%3A+Cluster+5+%28Score%3A+3.333%29+default+node.cytable]

"CyCSV-Version","1"
"SUID","name","selected"
"java.lang.Long","java.lang.String","java.lang.Boolean"
"","",""
"1: Cluster 5 (Score: 3.333) default node",""
"1930","ENSMUSG00000031617","false"
"1786","ENSMUSG00000047221","false"
"2153","ENSMUSG00000000782","false"
"2148","ENSMUSG00000001403","false"
"2082","ENSMUSG00000020873","false"
"304","ENSMUSG00000027434","false"
"1775","ENSMUSG00000048450","false"
