# Supplementary material for: Regulatory network analysis of Paneth cell and goblet cell enriched gut organoids using transcriptomics approaches
Source: Royal Society of Chemistry journal article supplement (doi:10.1039/c9mo00130a), 2019-12-10
Supplement: c9mo00130a2.cys [file c9mo00130a2.cys › CytoscapeSession-2019_09_26-21_57/tables/21421-1%3A+Cluster+6+%28Score%3A+2.667%29/HIDDEN-org.cytoscape.model.CyNetwork-21421+hidden+network.cytable]

"CyCSV-Version","1"
"SUID"
"java.lang.Long"
""
"21421 hidden network",""
"21421"
