# Supplementary material for: Regulatory network analysis of Paneth cell and goblet cell enriched gut organoids using transcriptomics approaches
Source: Royal Society of Chemistry journal article supplement (doi:10.1039/c9mo00130a), 2019-12-10
Supplement: c9mo00130a2.cys [file c9mo00130a2.cys › CytoscapeSession-2019_09_26-21_57/tables/21421-1%3A+Cluster+6+%28Score%3A+2.667%29/LOCAL_ATTRS-org.cytoscape.model.CyEdge-1%3A+Cluster+6+%28Score%3A+2.667%29+default+edge.cytable]

"CyCSV-Version","1"
"SUID","interaction","name","selected"
"java.lang.Long","java.lang.String","java.lang.String","java.lang.Boolean"
"","","",""
"1: Cluster 6 (Score: 2.667) default edge",""
"11667","TF-TG","ENSMUSG00000042258 (TF-TG) ENSMUSG00000046546","false"
"11666","TF-TG","ENSMUSG00000042258 (TF-TG) ENSMUSG00000046668","false"
"8914","TF-TG","ENSMUSG00000073043 (TF-TG) ENSMUSG00000046546","false"
"8913","TF-TG","ENSMUSG00000073043 (TF-TG) ENSMUSG00000046668","false"
