# Supplementary material for: Regulatory network analysis of Paneth cell and goblet cell enriched gut organoids using transcriptomics approaches
Source: Royal Society of Chemistry journal article supplement (doi:10.1039/c9mo00130a), 2019-12-10
Supplement: c9mo00130a2.cys [file c9mo00130a2.cys › CytoscapeSession-2019_09_26-21_57/tables/21431-1%3A+Cluster+7+%28Score%3A+2.667%29/LOCAL_ATTRS-org.cytoscape.model.CyEdge-1%3A+Cluster+7+%28Score%3A+2.667%29+default+edge.cytable]

"CyCSV-Version","1"
"SUID","interaction","name","selected"
"java.lang.Long","java.lang.String","java.lang.String","java.lang.Boolean"
"","","",""
"1: Cluster 7 (Score: 2.667) default edge",""
"2688","miRNA-mRNA","mmu-miR-101a-3p (miRNA-mRNA) ENSMUSG00000026335","false"
"3024","miRNA-mRNA","mmu-miR-7a-5p (miRNA-mRNA) ENSMUSG00000040118","false"
"3098","miRNA-mRNA","mmu-miR-7a-5p (miRNA-mRNA) ENSMUSG00000026335","false"
"2594","miRNA-mRNA","mmu-miR-101a-3p (miRNA-mRNA) ENSMUSG00000040118","false"
