# Supplementary material for: Regulatory network analysis of Paneth cell and goblet cell enriched gut organoids using transcriptomics approaches
Source: Royal Society of Chemistry journal article supplement (doi:10.1039/c9mo00130a), 2019-12-10
Supplement: c9mo00130a2.cys [file c9mo00130a2.cys › CytoscapeSession-2019_09_26-21_57/tables/21431-1%3A+Cluster+7+%28Score%3A+2.667%29/LOCAL_ATTRS-org.cytoscape.model.CyNode-1%3A+Cluster+7+%28Score%3A+2.667%29+default+node.cytable]

"CyCSV-Version","1"
"SUID","name","selected"
"java.lang.Long","java.lang.String","java.lang.Boolean"
"","",""
"1: Cluster 7 (Score: 2.667) default node",""
"203","mmu-miR-101a-3p","false"
"210","mmu-miR-7a-5p","false"
"1641","ENSMUSG00000026335","false"
"735","ENSMUSG00000040118","false"
