# Supplementary material for: Regulatory network analysis of Paneth cell and goblet cell enriched gut organoids using transcriptomics approaches
Source: Royal Society of Chemistry journal article supplement (doi:10.1039/c9mo00130a), 2019-12-10
Supplement: c9mo00130a2.cys [file c9mo00130a2.cys › CytoscapeSession-2019_09_26-21_57/tables/cytables.xml]

<?xml version="1.0" encoding="UTF-8" standalone="yes"?>
<cyTables>
    <virtualColumns>
        <virtualColumn name="shared name" sourceColumn="shared name" sourceTable="36-Gob_network_lfc1.txt/SHARED_ATTRS-org.cytoscape.model.CyNode-36+shared+node.cytable" sourceJoinKey="SUID" targetTable="21421-1%3A+Cluster+6+%28Score%3A+2.667%29/LOCAL_ATTRS-org.cytoscape.model.CyNode-1%3A+Cluster+6+%28Score%3A+2.667%29+default+node.cytable" targetJoinKey="SUID" immutable="false"/>
        <virtualColumn name="isExcludedFromPaths" sourceColumn="isExcludedFromPaths" sourceTable="36-Gob_network_lfc1.txt/SHARED_ATTRS-org.cytoscape.model.CyNode-36+shared+node.cytable" sourceJoinKey="SUID" targetTable="21421-1%3A+Cluster+6+%28Score%3A+2.667%29/LOCAL_ATTRS-org.cytoscape.model.CyNode-1%3A+Cluster+6+%28Score%3A+2.667%29+default+node.cytable" targetJoinKey="SUID" immutable="false"/>
        <virtualColumn name="isInPath" sourceColumn="isInPath" sourceTable="36-Gob_network_lfc1.txt/SHARED_ATTRS-org.cytoscape.model.CyNode-36+shared+node.cytable" sourceJoinKey="SUID" targetTable="21421-1%3A+Cluster+6+%28Score%3A+2.667%29/LOCAL_ATTRS-org.cytoscape.model.CyNode-1%3A+Cluster+6+%28Score%3A+2.667%29+default+node.cytable" targetJoinKey="SUID" immutable="false"/>
        <virtualColumn name="MCODE_Cluster" sourceColumn="MCODE_Cluster" sourceTable="36-Gob_network_lfc1.txt/SHARED_ATTRS-org.cytoscape.model.CyNode-36+shared+node.cytable" sourceJoinKey="SUID" targetTable="21421-1%3A+Cluster+6+%28Score%3A+2.667%29/LOCAL_ATTRS-org.cytoscape.model.CyNode-1%3A+Cluster+6+%28Score%3A+2.667%29+default+node.cytable" targetJoinKey="SUID" immutable="false"/>
        <virtualColumn name="MCODE_Node_Status" sourceColumn="MCODE_Node_Status" sourceTable="36-Gob_network_lfc1.txt/SHARED_ATTRS-org.cytoscape.model.CyNode-36+shared+node.cytable" sourceJoinKey="SUID" targetTable="21421-1%3A+Cluster+6+%28Score%3A+2.667%29/LOCAL_ATTRS-org.cytoscape.model.CyNode-1%3A+Cluster+6+%28Score%3A+2.667%29+default+node.cytable" targetJoinKey="SUID" immutable="false"/>
        <virtualColumn name="MCODE_Score" sourceColumn="MCODE_Score" sourceTable="36-Gob_network_lfc1.txt/SHARED_ATTRS-org.cytoscape.model.CyNode-36+shared+node.cytable" sourceJoinKey="SUID" targetTable="21421-1%3A+Cluster+6+%28Score%3A+2.667%29/LOCAL_ATTRS-org.cytoscape.model.CyNode-1%3A+Cluster+6+%28Score%3A+2.667%29+default+node.cytable" targetJoinKey="SUID" immutable="false"/>
        <virtualColumn name="Cluster" sourceColumn="Cluster" sourceTable="36-Gob_network_lfc1.txt/SHARED_ATTRS-org.cytoscape.model.CyNode-36+shared+node.cytable" sourceJoinKey="SUID" targetTable="21421-1%3A+Cluster+6+%28Score%3A+2.667%29/LOCAL_ATTRS-org.cytoscape.model.CyNode-1%3A+Cluster+6+%28Score%3A+2.667%29+default+node.cytable" targetJoinKey="SUID" immutable="false"/>
        <virtualColumn name="Node_Status" sourceColumn="Node_Status" sourceTable="36-Gob_network_lfc1.txt/SHARED_ATTRS-org.cytoscape.model.CyNode-36+shared+node.cytable" sourceJoinKey="SUID" targetTable="21421-1%3A+Cluster+6+%28Score%3A+2.667%29/LOCAL_ATTRS-org.cytoscape.model.CyNode-1%3A+Cluster+6+%28Score%3A+2.667%29+default+node.cytable" targetJoinKey="SUID" immutable="false"/>
        <virtualColumn name="Score" sourceColumn="Score" sourceTable="36-Gob_network_lfc1.txt/SHARED_ATTRS-org.cytoscape.model.CyNode-36+shared+node.cytable" sourceJoinKey="SUID" targetTable="21421-1%3A+Cluster+6+%28Score%3A+2.667%29/LOCAL_ATTRS-org.cytoscape.model.CyNode-1%3A+Cluster+6+%28Score%3A+2.667%29+default+node.cytable" targetJoinKey="SUID" immutable="false"/>
        <virtualColumn name="genesymbol" sourceColumn="genesymbol" sourceTable="36-Gob_network_lfc1.txt/SHARED_ATTRS-org.cytoscape.model.CyNode-36+shared+node.cytable" sourceJoinKey="SUID" targetTable="21421-1%3A+Cluster+6+%28Score%3A+2.667%29/LOCAL_ATTRS-org.cytoscape.model.CyNode-1%3A+Cluster+6+%28Score%3A+2.667%29+default+node.cytable" targetJoinKey="SUID" immutable="false"/>
        <virtualColumn name="chea3_Rank" sourceColumn="chea3_Rank" sourceTable="36-Gob_network_lfc1.txt/SHARED_ATTRS-org.cytoscape.model.CyNode-36+shared+node.cytable" sourceJoinKey="SUID" targetTable="21421-1%3A+Cluster+6+%28Score%3A+2.667%29/LOCAL_ATTRS-org.cytoscape.model.CyNode-1%3A+Cluster+6+%28Score%3A+2.667%29+default+node.cytable" targetJoinKey="SUID" immutable="false"/>
        <virtualColumn name="chea3_Score" sourceColumn="chea3_Score" sourceTable="36-Gob_network_lfc1.txt/SHARED_ATTRS-org.cytoscape.model.CyNode-36+shared+node.cytable" sourceJoinKey="SUID" targetTable="21421-1%3A+Cluster+6+%28Score%3A+2.667%29/LOCAL_ATTRS-org.cytoscape.model.CyNode-1%3A+Cluster+6+%28Score%3A+2.667%29+default+node.cytable" targetJoinKey="SUID" immutable="false"/>
        <virtualColumn name="chea3_Library" sourceColumn="chea3_Library" sourceTable="36-Gob_network_lfc1.txt/SHARED_ATTRS-org.cytoscape.model.CyNode-36+shared+node.cytable" sourceJoinKey="SUID" targetTable="21421-1%3A+Cluster+6+%28Score%3A+2.667%29/LOCAL_ATTRS-org.cytoscape.model.CyNode-1%3A+Cluster+6+%28Score%3A+2.667%29+default+node.cytable" targetJoinKey="SUID" immutable="false"/>
        <virtualColumn name="chea3_Overlapping_Genes" sourceColumn="chea3_Overlapping_Genes" sourceTable="36-Gob_network_lfc1.txt/SHARED_ATTRS-org.cytoscape.model.CyNode-36+shared+node.cytable" sourceJoinKey="SUID" targetTable="21421-1%3A+Cluster+6+%28Score%3A+2.667%29/LOCAL_ATTRS-org.cytoscape.model.CyNode-1%3A+Cluster+6+%28Score%3A+2.667%29+default+node.cytable" targetJoinKey="SUID" immutable="false"/>
        <virtualColumn name="shared name" sourceColumn="shared name" sourceTable="36-Gob_network_lfc1.txt/SHARED_ATTRS-org.cytoscape.model.CyEdge-36+shared+edge.cytable" sourceJoinKey="SUID" targetTable="21391-1%3A+Cluster+2+%28Score%3A+7.429%29/LOCAL_ATTRS-org.cytoscape.model.CyEdge-1%3A+Cluster+2+%28Score%3A+7.429%29+default+edge.cytable" targetJoinKey="SUID" immutable="false"/>
        <virtualColumn name="shared interaction" sourceColumn="shared interaction" sourceTable="36-Gob_network_lfc1.txt/SHARED_ATTRS-org.cytoscape.model.CyEdge-36+shared+edge.cytable" sourceJoinKey="SUID" targetTable="21391-1%3A+Cluster+2+%28Score%3A+7.429%29/LOCAL_ATTRS-org.cytoscape.model.CyEdge-1%3A+Cluster+2+%28Score%3A+7.429%29+default+edge.cytable" targetJoinKey="SUID" immutable="false"/>
        <virtualColumn name="isInPath" sourceColumn="isInPath" sourceTable="36-Gob_network_lfc1.txt/SHARED_ATTRS-org.cytoscape.model.CyEdge-36+shared+edge.cytable" sourceJoinKey="SUID" targetTable="21391-1%3A+Cluster+2+%28Score%3A+7.429%29/LOCAL_ATTRS-org.cytoscape.model.CyEdge-1%3A+Cluster+2+%28Score%3A+7.429%29+default+edge.cytable" targetJoinKey="SUID" immutable="false"/>
        <virtualColumn name="Module_Edge_Color" sourceColumn="Module_Edge_Color" sourceTable="36-Gob_network_lfc1.txt/SHARED_ATTRS-org.cytoscape.model.CyEdge-36+shared+edge.cytable" sourceJoinKey="SUID" targetTable="21391-1%3A+Cluster+2+%28Score%3A+7.429%29/LOCAL_ATTRS-org.cytoscape.model.CyEdge-1%3A+Cluster+2+%28Score%3A+7.429%29+default+edge.cytable" targetJoinKey="SUID" immutable="false"/>
        <virtualColumn name="shared name" sourceColumn="shared name" sourceTable="36-Gob_network_lfc1.txt/SHARED_ATTRS-org.cytoscape.model.CyNode-36+shared+node.cytable" sourceJoinKey="SUID" targetTable="21381-1%3A+Cluster+1+%28Score%3A+8.022%29/LOCAL_ATTRS-org.cytoscape.model.CyNode-1%3A+Cluster+1+%28Score%3A+8.022%29+default+node.cytable" targetJoinKey="SUID" immutable="false"/>
        <virtualColumn name="isExcludedFromPaths" sourceColumn="isExcludedFromPaths" sourceTable="36-Gob_network_lfc1.txt/SHARED_ATTRS-org.cytoscape.model.CyNode-36+shared+node.cytable" sourceJoinKey="SUID" targetTable="21381-1%3A+Cluster+1+%28Score%3A+8.022%29/LOCAL_ATTRS-org.cytoscape.model.CyNode-1%3A+Cluster+1+%28Score%3A+8.022%29+default+node.cytable" targetJoinKey="SUID" immutable="false"/>
        <virtualColumn name="isInPath" sourceColumn="isInPath" sourceTable="36-Gob_network_lfc1.txt/SHARED_ATTRS-org.cytoscape.model.CyNode-36+shared+node.cytable" sourceJoinKey="SUID" targetTable="21381-1%3A+Cluster+1+%28Score%3A+8.022%29/LOCAL_ATTRS-org.cytoscape.model.CyNode-1%3A+Cluster+1+%28Score%3A+8.022%29+default+node.cytable" targetJoinKey="SUID" immutable="false"/>
        <virtualColumn name="MCODE_Cluster" sourceColumn="MCODE_Cluster" sourceTable="36-Gob_network_lfc1.txt/SHARED_ATTRS-org.cytoscape.model.CyNode-36+shared+node.cytable" sourceJoinKey="SUID" targetTable="21381-1%3A+Cluster+1+%28Score%3A+8.022%29/LOCAL_ATTRS-org.cytoscape.model.CyNode-1%3A+Cluster+1+%28Score%3A+8.022%29+default+node.cytable" targetJoinKey="SUID" immutable="false"/>
        <virtualColumn name="MCODE_Node_Status" sourceColumn="MCODE_Node_Status" sourceTable="36-Gob_network_lfc1.txt/SHARED_ATTRS-org.cytoscape.model.CyNode-36+shared+node.cytable" sourceJoinKey="SUID" targetTable="21381-1%3A+Cluster+1+%28Score%3A+8.022%29/LOCAL_ATTRS-org.cytoscape.model.CyNode-1%3A+Cluster+1+%28Score%3A+8.022%29+default+node.cytable" targetJoinKey="SUID" immutable="false"/>
        <virtualColumn name="MCODE_Score" sourceColumn="MCODE_Score" sourceTable="36-Gob_network_lfc1.txt/SHARED_ATTRS-org.cytoscape.model.CyNode-36+shared+node.cytable" sourceJoinKey="SUID" targetTable="21381-1%3A+Cluster+1+%28Score%3A+8.022%29/LOCAL_ATTRS-org.cytoscape.model.CyNode-1%3A+Cluster+1+%28Score%3A+8.022%29+default+node.cytable" targetJoinKey="SUID" immutable="false"/>
        <virtualColumn name="Cluster" sourceColumn="Cluster" sourceTable="36-Gob_network_lfc1.txt/SHARED_ATTRS-org.cytoscape.model.CyNode-36+shared+node.cytable" sourceJoinKey="SUID" targetTable="21381-1%3A+Cluster+1+%28Score%3A+8.022%29/LOCAL_ATTRS-org.cytoscape.model.CyNode-1%3A+Cluster+1+%28Score%3A+8.022%29+default+node.cytable" targetJoinKey="SUID" immutable="false"/>
        <virtualColumn name="Node_Status" sourceColumn="Node_Status" sourceTable="36-Gob_network_lfc1.txt/SHARED_ATTRS-org.cytoscape.model.CyNode-36+shared+node.cytable" sourceJoinKey="SUID" targetTable="21381-1%3A+Cluster+1+%28Score%3A+8.022%29/LOCAL_ATTRS-org.cytoscape.model.CyNode-1%3A+Cluster+1+%28Score%3A+8.022%29+default+node.cytable" targetJoinKey="SUID" immutable="false"/>
        <virtualColumn name="Score" sourceColumn="Score" sourceTable="36-Gob_network_lfc1.txt/SHARED_ATTRS-org.cytoscape.model.CyNode-36+shared+node.cytable" sourceJoinKey="SUID" targetTable="21381-1%3A+Cluster+1+%28Score%3A+8.022%29/LOCAL_ATTRS-org.cytoscape.model.CyNode-1%3A+Cluster+1+%28Score%3A+8.022%29+default+node.cytable" targetJoinKey="SUID" immutable="false"/>
        <virtualColumn name="genesymbol" sourceColumn="genesymbol" sourceTable="36-Gob_network_lfc1.txt/SHARED_ATTRS-org.cytoscape.model.CyNode-36+shared+node.cytable" sourceJoinKey="SUID" targetTable="21381-1%3A+Cluster+1+%28Score%3A+8.022%29/LOCAL_ATTRS-org.cytoscape.model.CyNode-1%3A+Cluster+1+%28Score%3A+8.022%29+default+node.cytable" targetJoinKey="SUID" immutable="false"/>
        <virtualColumn name="chea3_Rank" sourceColumn="chea3_Rank" sourceTable="36-Gob_network_lfc1.txt/SHARED_ATTRS-org.cytoscape.model.CyNode-36+shared+node.cytable" sourceJoinKey="SUID" targetTable="21381-1%3A+Cluster+1+%28Score%3A+8.022%29/LOCAL_ATTRS-org.cytoscape.model.CyNode-1%3A+Cluster+1+%28Score%3A+8.022%29+default+node.cytable" targetJoinKey="SUID" immutable="false"/>
        <virtualColumn name="chea3_Score" sourceColumn="chea3_Score" sourceTable="36-Gob_network_lfc1.txt/SHARED_ATTRS-org.cytoscape.model.CyNode-36+shared+node.cytable" sourceJoinKey="SUID" targetTable="21381-1%3A+Cluster+1+%28Score%3A+8.022%29/LOCAL_ATTRS-org.cytoscape.model.CyNode-1%3A+Cluster+1+%28Score%3A+8.022%29+default+node.cytable" targetJoinKey="SUID" immutable="false"/>
        <virtualColumn name="chea3_Library" sourceColumn="chea3_Library" sourceTable="36-Gob_network_lfc1.txt/SHARED_ATTRS-org.cytoscape.model.CyNode-36+shared+node.cytable" sourceJoinKey="SUID" targetTable="21381-1%3A+Cluster+1+%28Score%3A+8.022%29/LOCAL_ATTRS-org.cytoscape.model.CyNode-1%3A+Cluster+1+%28Score%3A+8.022%29+default+node.cytable" targetJoinKey="SUID" immutable="false"/>
        <virtualColumn name="chea3_Overlapping_Genes" sourceColumn="chea3_Overlapping_Genes" sourceTable="36-Gob_network_lfc1.txt/SHARED_ATTRS-org.cytoscape.model.CyNode-36+shared+node.cytable" sourceJoinKey="SUID" targetTable="21381-1%3A+Cluster+1+%28Score%3A+8.022%29/LOCAL_ATTRS-org.cytoscape.model.CyNode-1%3A+Cluster+1+%28Score%3A+8.022%29+default+node.cytable" targetJoinKey="SUID" immutable="false"/>
        <virtualColumn name="shared name" sourceColumn="shared name" sourceTable="36-Gob_network_lfc1.txt/SHARED_ATTRS-org.cytoscape.model.CyNetwork-36+shared+network.cytable" sourceJoinKey="SUID" targetTable="21421-1%3A+Cluster+6+%28Score%3A+2.667%29/LOCAL_ATTRS-org.cytoscape.model.CyNetwork-1%3A+Cluster+6+%28Score%3A+2.667%29+default+network.cytable" targetJoinKey="SUID" immutable="false"/>
        <virtualColumn name="shared name" sourceColumn="shared name" sourceTable="36-Gob_network_lfc1.txt/SHARED_ATTRS-org.cytoscape.model.CyNode-36+shared+node.cytable" sourceJoinKey="SUID" targetTable="21371-1%3A+Cluster+3+%28Score%3A+5.923%29/LOCAL_ATTRS-org.cytoscape.model.CyNode-1%3A+Cluster+3+%28Score%3A+5.923%29+default+node.cytable" targetJoinKey="SUID" immutable="false"/>
        <virtualColumn name="isExcludedFromPaths" sourceColumn="isExcludedFromPaths" sourceTable="36-Gob_network_lfc1.txt/SHARED_ATTRS-org.cytoscape.model.CyNode-36+shared+node.cytable" sourceJoinKey="SUID" targetTable="21371-1%3A+Cluster+3+%28Score%3A+5.923%29/LOCAL_ATTRS-org.cytoscape.model.CyNode-1%3A+Cluster+3+%28Score%3A+5.923%29+default+node.cytable" targetJoinKey="SUID" immutable="false"/>
        <virtualColumn name="isInPath" sourceColumn="isInPath" sourceTable="36-Gob_network_lfc1.txt/SHARED_ATTRS-org.cytoscape.model.CyNode-36+shared+node.cytable" sourceJoinKey="SUID" targetTable="21371-1%3A+Cluster+3+%28Score%3A+5.923%29/LOCAL_ATTRS-org.cytoscape.model.CyNode-1%3A+Cluster+3+%28Score%3A+5.923%29+default+node.cytable" targetJoinKey="SUID" immutable="false"/>
        <virtualColumn name="MCODE_Cluster" sourceColumn="MCODE_Cluster" sourceTable="36-Gob_network_lfc1.txt/SHARED_ATTRS-org.cytoscape.model.CyNode-36+shared+node.cytable" sourceJoinKey="SUID" targetTable="21371-1%3A+Cluster+3+%28Score%3A+5.923%29/LOCAL_ATTRS-org.cytoscape.model.CyNode-1%3A+Cluster+3+%28Score%3A+5.923%29+default+node.cytable" targetJoinKey="SUID" immutable="false"/>
        <virtualColumn name="MCODE_Node_Status" sourceColumn="MCODE_Node_Status" sourceTable="36-Gob_network_lfc1.txt/SHARED_ATTRS-org.cytoscape.model.CyNode-36+shared+node.cytable" sourceJoinKey="SUID" targetTable="21371-1%3A+Cluster+3+%28Score%3A+5.923%29/LOCAL_ATTRS-org.cytoscape.model.CyNode-1%3A+Cluster+3+%28Score%3A+5.923%29+default+node.cytable" targetJoinKey="SUID" immutable="false"/>
        <virtualColumn name="MCODE_Score" sourceColumn="MCODE_Score" sourceTable="36-Gob_network_lfc1.txt/SHARED_ATTRS-org.cytoscape.model.CyNode-36+shared+node.cytable" sourceJoinKey="SUID" targetTable="21371-1%3A+Cluster+3+%28Score%3A+5.923%29/LOCAL_ATTRS-org.cytoscape.model.CyNode-1%3A+Cluster+3+%28Score%3A+5.923%29+default+node.cytable" targetJoinKey="SUID" immutable="false"/>
        <virtualColumn name="Cluster" sourceColumn="Cluster" sourceTable="36-Gob_network_lfc1.txt/SHARED_ATTRS-org.cytoscape.model.CyNode-36+shared+node.cytable" sourceJoinKey="SUID" targetTable="21371-1%3A+Cluster+3+%28Score%3A+5.923%29/LOCAL_ATTRS-org.cytoscape.model.CyNode-1%3A+Cluster+3+%28Score%3A+5.923%29+default+node.cytable" targetJoinKey="SUID" immutable="false"/>
        <virtualColumn name="Node_Status" sourceColumn="Node_Status" sourceTable="36-Gob_network_lfc1.txt/SHARED_ATTRS-org.cytoscape.model.CyNode-36+shared+node.cytable" sourceJoinKey="SUID" targetTable="21371-1%3A+Cluster+3+%28Score%3A+5.923%29/LOCAL_ATTRS-org.cytoscape.model.CyNode-1%3A+Cluster+3+%28Score%3A+5.923%29+default+node.cytable" targetJoinKey="SUID" immutable="false"/>
        <virtualColumn name="Score" sourceColumn="Score" sourceTable="36-Gob_network_lfc1.txt/SHARED_ATTRS-org.cytoscape.model.CyNode-36+shared+node.cytable" sourceJoinKey="SUID" targetTable="21371-1%3A+Cluster+3+%28Score%3A+5.923%29/LOCAL_ATTRS-org.cytoscape.model.CyNode-1%3A+Cluster+3+%28Score%3A+5.923%29+default+node.cytable" targetJoinKey="SUID" immutable="false"/>
        <virtualColumn name="genesymbol" sourceColumn="genesymbol" sourceTable="36-Gob_network_lfc1.txt/SHARED_ATTRS-org.cytoscape.model.CyNode-36+shared+node.cytable" sourceJoinKey="SUID" targetTable="21371-1%3A+Cluster+3+%28Score%3A+5.923%29/LOCAL_ATTRS-org.cytoscape.model.CyNode-1%3A+Cluster+3+%28Score%3A+5.923%29+default+node.cytable" targetJoinKey="SUID" immutable="false"/>
        <virtualColumn name="chea3_Rank" sourceColumn="chea3_Rank" sourceTable="36-Gob_network_lfc1.txt/SHARED_ATTRS-org.cytoscape.model.CyNode-36+shared+node.cytable" sourceJoinKey="SUID" targetTable="21371-1%3A+Cluster+3+%28Score%3A+5.923%29/LOCAL_ATTRS-org.cytoscape.model.CyNode-1%3A+Cluster+3+%28Score%3A+5.923%29+default+node.cytable" targetJoinKey="SUID" immutable="false"/>
        <virtualColumn name="chea3_Score" sourceColumn="chea3_Score" sourceTable="36-Gob_network_lfc1.txt/SHARED_ATTRS-org.cytoscape.model.CyNode-36+shared+node.cytable" sourceJoinKey="SUID" targetTable="21371-1%3A+Cluster+3+%28Score%3A+5.923%29/LOCAL_ATTRS-org.cytoscape.model.CyNode-1%3A+Cluster+3+%28Score%3A+5.923%29+default+node.cytable" targetJoinKey="SUID" immutable="false"/>
        <virtualColumn name="chea3_Library" sourceColumn="chea3_Library" sourceTable="36-Gob_network_lfc1.txt/SHARED_ATTRS-org.cytoscape.model.CyNode-36+shared+node.cytable" sourceJoinKey="SUID" targetTable="21371-1%3A+Cluster+3+%28Score%3A+5.923%29/LOCAL_ATTRS-org.cytoscape.model.CyNode-1%3A+Cluster+3+%28Score%3A+5.923%29+default+node.cytable" targetJoinKey="SUID" immutable="false"/>
        <virtualColumn name="chea3_Overlapping_Genes" sourceColumn="chea3_Overlapping_Genes" sourceTable="36-Gob_network_lfc1.txt/SHARED_ATTRS-org.cytoscape.model.CyNode-36+shared+node.cytable" sourceJoinKey="SUID" targetTable="21371-1%3A+Cluster+3+%28Score%3A+5.923%29/LOCAL_ATTRS-org.cytoscape.model.CyNode-1%3A+Cluster+3+%28Score%3A+5.923%29+default+node.cytable" targetJoinKey="SUID" immutable="false"/>
        <virtualColumn name="shared name" sourceColumn="shared name" sourceTable="36-Gob_network_lfc1.txt/SHARED_ATTRS-org.cytoscape.model.CyNetwork-36+shared+network.cytable" sourceJoinKey="SUID" targetTable="36-Gob_network_lfc1.txt/LOCAL_ATTRS-org.cytoscape.model.CyNetwork-36+default+network.cytable" targetJoinKey="SUID" immutable="false"/>
        <virtualColumn name="shared name" sourceColumn="shared name" sourceTable="36-Gob_network_lfc1.txt/SHARED_ATTRS-org.cytoscape.model.CyNode-36+shared+node.cytable" sourceJoinKey="SUID" targetTable="62-Gob_network_lfc1.txt/LOCAL_ATTRS-org.cytoscape.model.CyNode-Gob_network_lfc1.txt+default+node.cytable" targetJoinKey="SUID" immutable="false"/>
        <virtualColumn name="isExcludedFromPaths" sourceColumn="isExcludedFromPaths" sourceTable="36-Gob_network_lfc1.txt/SHARED_ATTRS-org.cytoscape.model.CyNode-36+shared+node.cytable" sourceJoinKey="SUID" targetTable="62-Gob_network_lfc1.txt/LOCAL_ATTRS-org.cytoscape.model.CyNode-Gob_network_lfc1.txt+default+node.cytable" targetJoinKey="SUID" immutable="false"/>
        <virtualColumn name="isInPath" sourceColumn="isInPath" sourceTable="36-Gob_network_lfc1.txt/SHARED_ATTRS-org.cytoscape.model.CyNode-36+shared+node.cytable" sourceJoinKey="SUID" targetTable="62-Gob_network_lfc1.txt/LOCAL_ATTRS-org.cytoscape.model.CyNode-Gob_network_lfc1.txt+default+node.cytable" targetJoinKey="SUID" immutable="false"/>
        <virtualColumn name="MCODE_Cluster" sourceColumn="MCODE_Cluster" sourceTable="36-Gob_network_lfc1.txt/SHARED_ATTRS-org.cytoscape.model.CyNode-36+shared+node.cytable" sourceJoinKey="SUID" targetTable="62-Gob_network_lfc1.txt/LOCAL_ATTRS-org.cytoscape.model.CyNode-Gob_network_lfc1.txt+default+node.cytable" targetJoinKey="SUID" immutable="false"/>
        <virtualColumn name="MCODE_Node_Status" sourceColumn="MCODE_Node_Status" sourceTable="36-Gob_network_lfc1.txt/SHARED_ATTRS-org.cytoscape.model.CyNode-36+shared+node.cytable" sourceJoinKey="SUID" targetTable="62-Gob_network_lfc1.txt/LOCAL_ATTRS-org.cytoscape.model.CyNode-Gob_network_lfc1.txt+default+node.cytable" targetJoinKey="SUID" immutable="false"/>
        <virtualColumn name="MCODE_Score" sourceColumn="MCODE_Score" sourceTable="36-Gob_network_lfc1.txt/SHARED_ATTRS-org.cytoscape.model.CyNode-36+shared+node.cytable" sourceJoinKey="SUID" targetTable="62-Gob_network_lfc1.txt/LOCAL_ATTRS-org.cytoscape.model.CyNode-Gob_network_lfc1.txt+default+node.cytable" targetJoinKey="SUID" immutable="false"/>
        <virtualColumn name="Cluster" sourceColumn="Cluster" sourceTable="36-Gob_network_lfc1.txt/SHARED_ATTRS-org.cytoscape.model.CyNode-36+shared+node.cytable" sourceJoinKey="SUID" targetTable="62-Gob_network_lfc1.txt/LOCAL_ATTRS-org.cytoscape.model.CyNode-Gob_network_lfc1.txt+default+node.cytable" targetJoinKey="SUID" immutable="false"/>
        <virtualColumn name="Node_Status" sourceColumn="Node_Status" sourceTable="36-Gob_network_lfc1.txt/SHARED_ATTRS-org.cytoscape.model.CyNode-36+shared+node.cytable" sourceJoinKey="SUID" targetTable="62-Gob_network_lfc1.txt/LOCAL_ATTRS-org.cytoscape.model.CyNode-Gob_network_lfc1.txt+default+node.cytable" targetJoinKey="SUID" immutable="false"/>
        <virtualColumn name="Score" sourceColumn="Score" sourceTable="36-Gob_network_lfc1.txt/SHARED_ATTRS-org.cytoscape.model.CyNode-36+shared+node.cytable" sourceJoinKey="SUID" targetTable="62-Gob_network_lfc1.txt/LOCAL_ATTRS-org.cytoscape.model.CyNode-Gob_network_lfc1.txt+default+node.cytable" targetJoinKey="SUID" immutable="false"/>
        <virtualColumn name="genesymbol" sourceColumn="genesymbol" sourceTable="36-Gob_network_lfc1.txt/SHARED_ATTRS-org.cytoscape.model.CyNode-36+shared+node.cytable" sourceJoinKey="SUID" targetTable="62-Gob_network_lfc1.txt/LOCAL_ATTRS-org.cytoscape.model.CyNode-Gob_network_lfc1.txt+default+node.cytable" targetJoinKey="SUID" immutable="false"/>
        <virtualColumn name="chea3_Rank" sourceColumn="chea3_Rank" sourceTable="36-Gob_network_lfc1.txt/SHARED_ATTRS-org.cytoscape.model.CyNode-36+shared+node.cytable" sourceJoinKey="SUID" targetTable="62-Gob_network_lfc1.txt/LOCAL_ATTRS-org.cytoscape.model.CyNode-Gob_network_lfc1.txt+default+node.cytable" targetJoinKey="SUID" immutable="false"/>
        <virtualColumn name="chea3_Score" sourceColumn="chea3_Score" sourceTable="36-Gob_network_lfc1.txt/SHARED_ATTRS-org.cytoscape.model.CyNode-36+shared+node.cytable" sourceJoinKey="SUID" targetTable="62-Gob_network_lfc1.txt/LOCAL_ATTRS-org.cytoscape.model.CyNode-Gob_network_lfc1.txt+default+node.cytable" targetJoinKey="SUID" immutable="false"/>
        <virtualColumn name="chea3_Library" sourceColumn="chea3_Library" sourceTable="36-Gob_network_lfc1.txt/SHARED_ATTRS-org.cytoscape.model.CyNode-36+shared+node.cytable" sourceJoinKey="SUID" targetTable="62-Gob_network_lfc1.txt/LOCAL_ATTRS-org.cytoscape.model.CyNode-Gob_network_lfc1.txt+default+node.cytable" targetJoinKey="SUID" immutable="false"/>
        <virtualColumn name="chea3_Overlapping_Genes" sourceColumn="chea3_Overlapping_Genes" sourceTable="36-Gob_network_lfc1.txt/SHARED_ATTRS-org.cytoscape.model.CyNode-36+shared+node.cytable" sourceJoinKey="SUID" targetTable="62-Gob_network_lfc1.txt/LOCAL_ATTRS-org.cytoscape.model.CyNode-Gob_network_lfc1.txt+default+node.cytable" targetJoinKey="SUID" immutable="false"/>
        <virtualColumn name="shared name" sourceColumn="shared name" sourceTable="36-Gob_network_lfc1.txt/SHARED_ATTRS-org.cytoscape.model.CyNetwork-36+shared+network.cytable" sourceJoinKey="SUID" targetTable="52-52/LOCAL_ATTRS-org.cytoscape.model.CyNetwork-52+default+network.cytable" targetJoinKey="SUID" immutable="false"/>
        <virtualColumn name="shared name" sourceColumn="shared name" sourceTable="36-Gob_network_lfc1.txt/SHARED_ATTRS-org.cytoscape.model.CyNetwork-36+shared+network.cytable" sourceJoinKey="SUID" targetTable="21391-1%3A+Cluster+2+%28Score%3A+7.429%29/LOCAL_ATTRS-org.cytoscape.model.CyNetwork-1%3A+Cluster+2+%28Score%3A+7.429%29+default+network.cytable" targetJoinKey="SUID" immutable="false"/>
        <virtualColumn name="shared name" sourceColumn="shared name" sourceTable="36-Gob_network_lfc1.txt/SHARED_ATTRS-org.cytoscape.model.CyNode-36+shared+node.cytable" sourceJoinKey="SUID" targetTable="36-Gob_network_lfc1.txt/LOCAL_ATTRS-org.cytoscape.model.CyNode-36+default+node.cytable" targetJoinKey="SUID" immutable="false"/>
        <virtualColumn name="isExcludedFromPaths" sourceColumn="isExcludedFromPaths" sourceTable="36-Gob_network_lfc1.txt/SHARED_ATTRS-org.cytoscape.model.CyNode-36+shared+node.cytable" sourceJoinKey="SUID" targetTable="36-Gob_network_lfc1.txt/LOCAL_ATTRS-org.cytoscape.model.CyNode-36+default+node.cytable" targetJoinKey="SUID" immutable="false"/>
        <virtualColumn name="isInPath" sourceColumn="isInPath" sourceTable="36-Gob_network_lfc1.txt/SHARED_ATTRS-org.cytoscape.model.CyNode-36+shared+node.cytable" sourceJoinKey="SUID" targetTable="36-Gob_network_lfc1.txt/LOCAL_ATTRS-org.cytoscape.model.CyNode-36+default+node.cytable" targetJoinKey="SUID" immutable="false"/>
        <virtualColumn name="MCODE_Cluster" sourceColumn="MCODE_Cluster" sourceTable="36-Gob_network_lfc1.txt/SHARED_ATTRS-org.cytoscape.model.CyNode-36+shared+node.cytable" sourceJoinKey="SUID" targetTable="36-Gob_network_lfc1.txt/LOCAL_ATTRS-org.cytoscape.model.CyNode-36+default+node.cytable" targetJoinKey="SUID" immutable="false"/>
        <virtualColumn name="MCODE_Node_Status" sourceColumn="MCODE_Node_Status" sourceTable="36-Gob_network_lfc1.txt/SHARED_ATTRS-org.cytoscape.model.CyNode-36+shared+node.cytable" sourceJoinKey="SUID" targetTable="36-Gob_network_lfc1.txt/LOCAL_ATTRS-org.cytoscape.model.CyNode-36+default+node.cytable" targetJoinKey="SUID" immutable="false"/>
        <virtualColumn name="MCODE_Score" sourceColumn="MCODE_Score" sourceTable="36-Gob_network_lfc1.txt/SHARED_ATTRS-org.cytoscape.model.CyNode-36+shared+node.cytable" sourceJoinKey="SUID" targetTable="36-Gob_network_lfc1.txt/LOCAL_ATTRS-org.cytoscape.model.CyNode-36+default+node.cytable" targetJoinKey="SUID" immutable="false"/>
        <virtualColumn name="Cluster" sourceColumn="Cluster" sourceTable="36-Gob_network_lfc1.txt/SHARED_ATTRS-org.cytoscape.model.CyNode-36+shared+node.cytable" sourceJoinKey="SUID" targetTable="36-Gob_network_lfc1.txt/LOCAL_ATTRS-org.cytoscape.model.CyNode-36+default+node.cytable" targetJoinKey="SUID" immutable="false"/>
        <virtualColumn name="Node_Status" sourceColumn="Node_Status" sourceTable="36-Gob_network_lfc1.txt/SHARED_ATTRS-org.cytoscape.model.CyNode-36+shared+node.cytable" sourceJoinKey="SUID" targetTable="36-Gob_network_lfc1.txt/LOCAL_ATTRS-org.cytoscape.model.CyNode-36+default+node.cytable" targetJoinKey="SUID" immutable="false"/>
        <virtualColumn name="Score" sourceColumn="Score" sourceTable="36-Gob_network_lfc1.txt/SHARED_ATTRS-org.cytoscape.model.CyNode-36+shared+node.cytable" sourceJoinKey="SUID" targetTable="36-Gob_network_lfc1.txt/LOCAL_ATTRS-org.cytoscape.model.CyNode-36+default+node.cytable" targetJoinKey="SUID" immutable="false"/>
        <virtualColumn name="genesymbol" sourceColumn="genesymbol" sourceTable="36-Gob_network_lfc1.txt/SHARED_ATTRS-org.cytoscape.model.CyNode-36+shared+node.cytable" sourceJoinKey="SUID" targetTable="36-Gob_network_lfc1.txt/LOCAL_ATTRS-org.cytoscape.model.CyNode-36+default+node.cytable" targetJoinKey="SUID" immutable="false"/>
        <virtualColumn name="chea3_Rank" sourceColumn="chea3_Rank" sourceTable="36-Gob_network_lfc1.txt/SHARED_ATTRS-org.cytoscape.model.CyNode-36+shared+node.cytable" sourceJoinKey="SUID" targetTable="36-Gob_network_lfc1.txt/LOCAL_ATTRS-org.cytoscape.model.CyNode-36+default+node.cytable" targetJoinKey="SUID" immutable="false"/>
        <virtualColumn name="chea3_Score" sourceColumn="chea3_Score" sourceTable="36-Gob_network_lfc1.txt/SHARED_ATTRS-org.cytoscape.model.CyNode-36+shared+node.cytable" sourceJoinKey="SUID" targetTable="36-Gob_network_lfc1.txt/LOCAL_ATTRS-org.cytoscape.model.CyNode-36+default+node.cytable" targetJoinKey="SUID" immutable="false"/>
        <virtualColumn name="chea3_Library" sourceColumn="chea3_Library" sourceTable="36-Gob_network_lfc1.txt/SHARED_ATTRS-org.cytoscape.model.CyNode-36+shared+node.cytable" sourceJoinKey="SUID" targetTable="36-Gob_network_lfc1.txt/LOCAL_ATTRS-org.cytoscape.model.CyNode-36+default+node.cytable" targetJoinKey="SUID" immutable="false"/>
        <virtualColumn name="chea3_Overlapping_Genes" sourceColumn="chea3_Overlapping_Genes" sourceTable="36-Gob_network_lfc1.txt/SHARED_ATTRS-org.cytoscape.model.CyNode-36+shared+node.cytable" sourceJoinKey="SUID" targetTable="36-Gob_network_lfc1.txt/LOCAL_ATTRS-org.cytoscape.model.CyNode-36+default+node.cytable" targetJoinKey="SUID" immutable="false"/>
        <virtualColumn name="shared name" sourceColumn="shared name" sourceTable="36-Gob_network_lfc1.txt/SHARED_ATTRS-org.cytoscape.model.CyEdge-36+shared+edge.cytable" sourceJoinKey="SUID" targetTable="21371-1%3A+Cluster+3+%28Score%3A+5.923%29/LOCAL_ATTRS-org.cytoscape.model.CyEdge-1%3A+Cluster+3+%28Score%3A+5.923%29+default+edge.cytable" targetJoinKey="SUID" immutable="false"/>
        <virtualColumn name="shared interaction" sourceColumn="shared interaction" sourceTable="36-Gob_network_lfc1.txt/SHARED_ATTRS-org.cytoscape.model.CyEdge-36+shared+edge.cytable" sourceJoinKey="SUID" targetTable="21371-1%3A+Cluster+3+%28Score%3A+5.923%29/LOCAL_ATTRS-org.cytoscape.model.CyEdge-1%3A+Cluster+3+%28Score%3A+5.923%29+default+edge.cytable" targetJoinKey="SUID" immutable="false"/>
        <virtualColumn name="isInPath" sourceColumn="isInPath" sourceTable="36-Gob_network_lfc1.txt/SHARED_ATTRS-org.cytoscape.model.CyEdge-36+shared+edge.cytable" sourceJoinKey="SUID" targetTable="21371-1%3A+Cluster+3+%28Score%3A+5.923%29/LOCAL_ATTRS-org.cytoscape.model.CyEdge-1%3A+Cluster+3+%28Score%3A+5.923%29+default+edge.cytable" targetJoinKey="SUID" immutable="false"/>
        <virtualColumn name="Module_Edge_Color" sourceColumn="Module_Edge_Color" sourceTable="36-Gob_network_lfc1.txt/SHARED_ATTRS-org.cytoscape.model.CyEdge-36+shared+edge.cytable" sourceJoinKey="SUID" targetTable="21371-1%3A+Cluster+3+%28Score%3A+5.923%29/LOCAL_ATTRS-org.cytoscape.model.CyEdge-1%3A+Cluster+3+%28Score%3A+5.923%29+default+edge.cytable" targetJoinKey="SUID" immutable="false"/>
        <virtualColumn name="shared name" sourceColumn="shared name" sourceTable="36-Gob_network_lfc1.txt/SHARED_ATTRS-org.cytoscape.model.CyNetwork-36+shared+network.cytable" sourceJoinKey="SUID" targetTable="21371-1%3A+Cluster+3+%28Score%3A+5.923%29/LOCAL_ATTRS-org.cytoscape.model.CyNetwork-1%3A+Cluster+3+%28Score%3A+5.923%29+default+network.cytable" targetJoinKey="SUID" immutable="false"/>
        <virtualColumn name="shared name" sourceColumn="shared name" sourceTable="36-Gob_network_lfc1.txt/SHARED_ATTRS-org.cytoscape.model.CyEdge-36+shared+edge.cytable" sourceJoinKey="SUID" targetTable="21411-1%3A+Cluster+5+%28Score%3A+3.333%29/LOCAL_ATTRS-org.cytoscape.model.CyEdge-1%3A+Cluster+5+%28Score%3A+3.333%29+default+edge.cytable" targetJoinKey="SUID" immutable="false"/>
        <virtualColumn name="shared interaction" sourceColumn="shared interaction" sourceTable="36-Gob_network_lfc1.txt/SHARED_ATTRS-org.cytoscape.model.CyEdge-36+shared+edge.cytable" sourceJoinKey="SUID" targetTable="21411-1%3A+Cluster+5+%28Score%3A+3.333%29/LOCAL_ATTRS-org.cytoscape.model.CyEdge-1%3A+Cluster+5+%28Score%3A+3.333%29+default+edge.cytable" targetJoinKey="SUID" immutable="false"/>
        <virtualColumn name="isInPath" sourceColumn="isInPath" sourceTable="36-Gob_network_lfc1.txt/SHARED_ATTRS-org.cytoscape.model.CyEdge-36+shared+edge.cytable" sourceJoinKey="SUID" targetTable="21411-1%3A+Cluster+5+%28Score%3A+3.333%29/LOCAL_ATTRS-org.cytoscape.model.CyEdge-1%3A+Cluster+5+%28Score%3A+3.333%29+default+edge.cytable" targetJoinKey="SUID" immutable="false"/>
        <virtualColumn name="Module_Edge_Color" sourceColumn="Module_Edge_Color" sourceTable="36-Gob_network_lfc1.txt/SHARED_ATTRS-org.cytoscape.model.CyEdge-36+shared+edge.cytable" sourceJoinKey="SUID" targetTable="21411-1%3A+Cluster+5+%28Score%3A+3.333%29/LOCAL_ATTRS-org.cytoscape.model.CyEdge-1%3A+Cluster+5+%28Score%3A+3.333%29+default+edge.cytable" targetJoinKey="SUID" immutable="false"/>
        <virtualColumn name="shared name" sourceColumn="shared name" sourceTable="36-Gob_network_lfc1.txt/SHARED_ATTRS-org.cytoscape.model.CyEdge-36+shared+edge.cytable" sourceJoinKey="SUID" targetTable="52-52/LOCAL_ATTRS-org.cytoscape.model.CyEdge-52+default+edge.cytable" targetJoinKey="SUID" immutable="false"/>
        <virtualColumn name="shared interaction" sourceColumn="shared interaction" sourceTable="36-Gob_network_lfc1.txt/SHARED_ATTRS-org.cytoscape.model.CyEdge-36+shared+edge.cytable" sourceJoinKey="SUID" targetTable="52-52/LOCAL_ATTRS-org.cytoscape.model.CyEdge-52+default+edge.cytable" targetJoinKey="SUID" immutable="false"/>
        <virtualColumn name="isInPath" sourceColumn="isInPath" sourceTable="36-Gob_network_lfc1.txt/SHARED_ATTRS-org.cytoscape.model.CyEdge-36+shared+edge.cytable" sourceJoinKey="SUID" targetTable="52-52/LOCAL_ATTRS-org.cytoscape.model.CyEdge-52+default+edge.cytable" targetJoinKey="SUID" immutable="false"/>
        <virtualColumn name="Module_Edge_Color" sourceColumn="Module_Edge_Color" sourceTable="36-Gob_network_lfc1.txt/SHARED_ATTRS-org.cytoscape.model.CyEdge-36+shared+edge.cytable" sourceJoinKey="SUID" targetTable="52-52/LOCAL_ATTRS-org.cytoscape.model.CyEdge-52+default+edge.cytable" targetJoinKey="SUID" immutable="false"/>
        <virtualColumn name="shared name" sourceColumn="shared name" sourceTable="36-Gob_network_lfc1.txt/SHARED_ATTRS-org.cytoscape.model.CyNode-36+shared+node.cytable" sourceJoinKey="SUID" targetTable="21391-1%3A+Cluster+2+%28Score%3A+7.429%29/LOCAL_ATTRS-org.cytoscape.model.CyNode-1%3A+Cluster+2+%28Score%3A+7.429%29+default+node.cytable" targetJoinKey="SUID" immutable="false"/>
        <virtualColumn name="isExcludedFromPaths" sourceColumn="isExcludedFromPaths" sourceTable="36-Gob_network_lfc1.txt/SHARED_ATTRS-org.cytoscape.model.CyNode-36+shared+node.cytable" sourceJoinKey="SUID" targetTable="21391-1%3A+Cluster+2+%28Score%3A+7.429%29/LOCAL_ATTRS-org.cytoscape.model.CyNode-1%3A+Cluster+2+%28Score%3A+7.429%29+default+node.cytable" targetJoinKey="SUID" immutable="false"/>
        <virtualColumn name="isInPath" sourceColumn="isInPath" sourceTable="36-Gob_network_lfc1.txt/SHARED_ATTRS-org.cytoscape.model.CyNode-36+shared+node.cytable" sourceJoinKey="SUID" targetTable="21391-1%3A+Cluster+2+%28Score%3A+7.429%29/LOCAL_ATTRS-org.cytoscape.model.CyNode-1%3A+Cluster+2+%28Score%3A+7.429%29+default+node.cytable" targetJoinKey="SUID" immutable="false"/>
        <virtualColumn name="MCODE_Cluster" sourceColumn="MCODE_Cluster" sourceTable="36-Gob_network_lfc1.txt/SHARED_ATTRS-org.cytoscape.model.CyNode-36+shared+node.cytable" sourceJoinKey="SUID" targetTable="21391-1%3A+Cluster+2+%28Score%3A+7.429%29/LOCAL_ATTRS-org.cytoscape.model.CyNode-1%3A+Cluster+2+%28Score%3A+7.429%29+default+node.cytable" targetJoinKey="SUID" immutable="false"/>
        <virtualColumn name="MCODE_Node_Status" sourceColumn="MCODE_Node_Status" sourceTable="36-Gob_network_lfc1.txt/SHARED_ATTRS-org.cytoscape.model.CyNode-36+shared+node.cytable" sourceJoinKey="SUID" targetTable="21391-1%3A+Cluster+2+%28Score%3A+7.429%29/LOCAL_ATTRS-org.cytoscape.model.CyNode-1%3A+Cluster+2+%28Score%3A+7.429%29+default+node.cytable" targetJoinKey="SUID" immutable="false"/>
        <virtualColumn name="MCODE_Score" sourceColumn="MCODE_Score" sourceTable="36-Gob_network_lfc1.txt/SHARED_ATTRS-org.cytoscape.model.CyNode-36+shared+node.cytable" sourceJoinKey="SUID" targetTable="21391-1%3A+Cluster+2+%28Score%3A+7.429%29/LOCAL_ATTRS-org.cytoscape.model.CyNode-1%3A+Cluster+2+%28Score%3A+7.429%29+default+node.cytable" targetJoinKey="SUID" immutable="false"/>
        <virtualColumn name="Cluster" sourceColumn="Cluster" sourceTable="36-Gob_network_lfc1.txt/SHARED_ATTRS-org.cytoscape.model.CyNode-36+shared+node.cytable" sourceJoinKey="SUID" targetTable="21391-1%3A+Cluster+2+%28Score%3A+7.429%29/LOCAL_ATTRS-org.cytoscape.model.CyNode-1%3A+Cluster+2+%28Score%3A+7.429%29+default+node.cytable" targetJoinKey="SUID" immutable="false"/>
        <virtualColumn name="Node_Status" sourceColumn="Node_Status" sourceTable="36-Gob_network_lfc1.txt/SHARED_ATTRS-org.cytoscape.model.CyNode-36+shared+node.cytable" sourceJoinKey="SUID" targetTable="21391-1%3A+Cluster+2+%28Score%3A+7.429%29/LOCAL_ATTRS-org.cytoscape.model.CyNode-1%3A+Cluster+2+%28Score%3A+7.429%29+default+node.cytable" targetJoinKey="SUID" immutable="false"/>
        <virtualColumn name="Score" sourceColumn="Score" sourceTable="36-Gob_network_lfc1.txt/SHARED_ATTRS-org.cytoscape.model.CyNode-36+shared+node.cytable" sourceJoinKey="SUID" targetTable="21391-1%3A+Cluster+2+%28Score%3A+7.429%29/LOCAL_ATTRS-org.cytoscape.model.CyNode-1%3A+Cluster+2+%28Score%3A+7.429%29+default+node.cytable" targetJoinKey="SUID" immutable="false"/>
        <virtualColumn name="genesymbol" sourceColumn="genesymbol" sourceTable="36-Gob_network_lfc1.txt/SHARED_ATTRS-org.cytoscape.model.CyNode-36+shared+node.cytable" sourceJoinKey="SUID" targetTable="21391-1%3A+Cluster+2+%28Score%3A+7.429%29/LOCAL_ATTRS-org.cytoscape.model.CyNode-1%3A+Cluster+2+%28Score%3A+7.429%29+default+node.cytable" targetJoinKey="SUID" immutable="false"/>
        <virtualColumn name="chea3_Rank" sourceColumn="chea3_Rank" sourceTable="36-Gob_network_lfc1.txt/SHARED_ATTRS-org.cytoscape.model.CyNode-36+shared+node.cytable" sourceJoinKey="SUID" targetTable="21391-1%3A+Cluster+2+%28Score%3A+7.429%29/LOCAL_ATTRS-org.cytoscape.model.CyNode-1%3A+Cluster+2+%28Score%3A+7.429%29+default+node.cytable" targetJoinKey="SUID" immutable="false"/>
        <virtualColumn name="chea3_Score" sourceColumn="chea3_Score" sourceTable="36-Gob_network_lfc1.txt/SHARED_ATTRS-org.cytoscape.model.CyNode-36+shared+node.cytable" sourceJoinKey="SUID" targetTable="21391-1%3A+Cluster+2+%28Score%3A+7.429%29/LOCAL_ATTRS-org.cytoscape.model.CyNode-1%3A+Cluster+2+%28Score%3A+7.429%29+default+node.cytable" targetJoinKey="SUID" immutable="false"/>
        <virtualColumn name="chea3_Library" sourceColumn="chea3_Library" sourceTable="36-Gob_network_lfc1.txt/SHARED_ATTRS-org.cytoscape.model.CyNode-36+shared+node.cytable" sourceJoinKey="SUID" targetTable="21391-1%3A+Cluster+2+%28Score%3A+7.429%29/LOCAL_ATTRS-org.cytoscape.model.CyNode-1%3A+Cluster+2+%28Score%3A+7.429%29+default+node.cytable" targetJoinKey="SUID" immutable="false"/>
        <virtualColumn name="chea3_Overlapping_Genes" sourceColumn="chea3_Overlapping_Genes" sourceTable="36-Gob_network_lfc1.txt/SHARED_ATTRS-org.cytoscape.model.CyNode-36+shared+node.cytable" sourceJoinKey="SUID" targetTable="21391-1%3A+Cluster+2+%28Score%3A+7.429%29/LOCAL_ATTRS-org.cytoscape.model.CyNode-1%3A+Cluster+2+%28Score%3A+7.429%29+default+node.cytable" targetJoinKey="SUID" immutable="false"/>
        <virtualColumn name="shared name" sourceColumn="shared name" sourceTable="36-Gob_network_lfc1.txt/SHARED_ATTRS-org.cytoscape.model.CyNode-36+shared+node.cytable" sourceJoinKey="SUID" targetTable="21411-1%3A+Cluster+5+%28Score%3A+3.333%29/LOCAL_ATTRS-org.cytoscape.model.CyNode-1%3A+Cluster+5+%28Score%3A+3.333%29+default+node.cytable" targetJoinKey="SUID" immutable="false"/>
        <virtualColumn name="isExcludedFromPaths" sourceColumn="isExcludedFromPaths" sourceTable="36-Gob_network_lfc1.txt/SHARED_ATTRS-org.cytoscape.model.CyNode-36+shared+node.cytable" sourceJoinKey="SUID" targetTable="21411-1%3A+Cluster+5+%28Score%3A+3.333%29/LOCAL_ATTRS-org.cytoscape.model.CyNode-1%3A+Cluster+5+%28Score%3A+3.333%29+default+node.cytable" targetJoinKey="SUID" immutable="false"/>
        <virtualColumn name="isInPath" sourceColumn="isInPath" sourceTable="36-Gob_network_lfc1.txt/SHARED_ATTRS-org.cytoscape.model.CyNode-36+shared+node.cytable" sourceJoinKey="SUID" targetTable="21411-1%3A+Cluster+5+%28Score%3A+3.333%29/LOCAL_ATTRS-org.cytoscape.model.CyNode-1%3A+Cluster+5+%28Score%3A+3.333%29+default+node.cytable" targetJoinKey="SUID" immutable="false"/>
        <virtualColumn name="MCODE_Cluster" sourceColumn="MCODE_Cluster" sourceTable="36-Gob_network_lfc1.txt/SHARED_ATTRS-org.cytoscape.model.CyNode-36+shared+node.cytable" sourceJoinKey="SUID" targetTable="21411-1%3A+Cluster+5+%28Score%3A+3.333%29/LOCAL_ATTRS-org.cytoscape.model.CyNode-1%3A+Cluster+5+%28Score%3A+3.333%29+default+node.cytable" targetJoinKey="SUID" immutable="false"/>
        <virtualColumn name="MCODE_Node_Status" sourceColumn="MCODE_Node_Status" sourceTable="36-Gob_network_lfc1.txt/SHARED_ATTRS-org.cytoscape.model.CyNode-36+shared+node.cytable" sourceJoinKey="SUID" targetTable="21411-1%3A+Cluster+5+%28Score%3A+3.333%29/LOCAL_ATTRS-org.cytoscape.model.CyNode-1%3A+Cluster+5+%28Score%3A+3.333%29+default+node.cytable" targetJoinKey="SUID" immutable="false"/>
        <virtualColumn name="MCODE_Score" sourceColumn="MCODE_Score" sourceTable="36-Gob_network_lfc1.txt/SHARED_ATTRS-org.cytoscape.model.CyNode-36+shared+node.cytable" sourceJoinKey="SUID" targetTable="21411-1%3A+Cluster+5+%28Score%3A+3.333%29/LOCAL_ATTRS-org.cytoscape.model.CyNode-1%3A+Cluster+5+%28Score%3A+3.333%29+default+node.cytable" targetJoinKey="SUID" immutable="false"/>
        <virtualColumn name="Cluster" sourceColumn="Cluster" sourceTable="36-Gob_network_lfc1.txt/SHARED_ATTRS-org.cytoscape.model.CyNode-36+shared+node.cytable" sourceJoinKey="SUID" targetTable="21411-1%3A+Cluster+5+%28Score%3A+3.333%29/LOCAL_ATTRS-org.cytoscape.model.CyNode-1%3A+Cluster+5+%28Score%3A+3.333%29+default+node.cytable" targetJoinKey="SUID" immutable="false"/>
        <virtualColumn name="Node_Status" sourceColumn="Node_Status" sourceTable="36-Gob_network_lfc1.txt/SHARED_ATTRS-org.cytoscape.model.CyNode-36+shared+node.cytable" sourceJoinKey="SUID" targetTable="21411-1%3A+Cluster+5+%28Score%3A+3.333%29/LOCAL_ATTRS-org.cytoscape.model.CyNode-1%3A+Cluster+5+%28Score%3A+3.333%29+default+node.cytable" targetJoinKey="SUID" immutable="false"/>
        <virtualColumn name="Score" sourceColumn="Score" sourceTable="36-Gob_network_lfc1.txt/SHARED_ATTRS-org.cytoscape.model.CyNode-36+shared+node.cytable" sourceJoinKey="SUID" targetTable="21411-1%3A+Cluster+5+%28Score%3A+3.333%29/LOCAL_ATTRS-org.cytoscape.model.CyNode-1%3A+Cluster+5+%28Score%3A+3.333%29+default+node.cytable" targetJoinKey="SUID" immutable="false"/>
        <virtualColumn name="genesymbol" sourceColumn="genesymbol" sourceTable="36-Gob_network_lfc1.txt/SHARED_ATTRS-org.cytoscape.model.CyNode-36+shared+node.cytable" sourceJoinKey="SUID" targetTable="21411-1%3A+Cluster+5+%28Score%3A+3.333%29/LOCAL_ATTRS-org.cytoscape.model.CyNode-1%3A+Cluster+5+%28Score%3A+3.333%29+default+node.cytable" targetJoinKey="SUID" immutable="false"/>
        <virtualColumn name="chea3_Rank" sourceColumn="chea3_Rank" sourceTable="36-Gob_network_lfc1.txt/SHARED_ATTRS-org.cytoscape.model.CyNode-36+shared+node.cytable" sourceJoinKey="SUID" targetTable="21411-1%3A+Cluster+5+%28Score%3A+3.333%29/LOCAL_ATTRS-org.cytoscape.model.CyNode-1%3A+Cluster+5+%28Score%3A+3.333%29+default+node.cytable" targetJoinKey="SUID" immutable="false"/>
        <virtualColumn name="chea3_Score" sourceColumn="chea3_Score" sourceTable="36-Gob_network_lfc1.txt/SHARED_ATTRS-org.cytoscape.model.CyNode-36+shared+node.cytable" sourceJoinKey="SUID" targetTable="21411-1%3A+Cluster+5+%28Score%3A+3.333%29/LOCAL_ATTRS-org.cytoscape.model.CyNode-1%3A+Cluster+5+%28Score%3A+3.333%29+default+node.cytable" targetJoinKey="SUID" immutable="false"/>
        <virtualColumn name="chea3_Library" sourceColumn="chea3_Library" sourceTable="36-Gob_network_lfc1.txt/SHARED_ATTRS-org.cytoscape.model.CyNode-36+shared+node.cytable" sourceJoinKey="SUID" targetTable="21411-1%3A+Cluster+5+%28Score%3A+3.333%29/LOCAL_ATTRS-org.cytoscape.model.CyNode-1%3A+Cluster+5+%28Score%3A+3.333%29+default+node.cytable" targetJoinKey="SUID" immutable="false"/>
        <virtualColumn name="chea3_Overlapping_Genes" sourceColumn="chea3_Overlapping_Genes" sourceTable="36-Gob_network_lfc1.txt/SHARED_ATTRS-org.cytoscape.model.CyNode-36+shared+node.cytable" sourceJoinKey="SUID" targetTable="21411-1%3A+Cluster+5+%28Score%3A+3.333%29/LOCAL_ATTRS-org.cytoscape.model.CyNode-1%3A+Cluster+5+%28Score%3A+3.333%29+default+node.cytable" targetJoinKey="SUID" immutable="false"/>
        <virtualColumn name="shared name" sourceColumn="shared name" sourceTable="36-Gob_network_lfc1.txt/SHARED_ATTRS-org.cytoscape.model.CyNode-36+shared+node.cytable" sourceJoinKey="SUID" targetTable="21431-1%3A+Cluster+7+%28Score%3A+2.667%29/LOCAL_ATTRS-org.cytoscape.model.CyNode-1%3A+Cluster+7+%28Score%3A+2.667%29+default+node.cytable" targetJoinKey="SUID" immutable="false"/>
        <virtualColumn name="isExcludedFromPaths" sourceColumn="isExcludedFromPaths" sourceTable="36-Gob_network_lfc1.txt/SHARED_ATTRS-org.cytoscape.model.CyNode-36+shared+node.cytable" sourceJoinKey="SUID" targetTable="21431-1%3A+Cluster+7+%28Score%3A+2.667%29/LOCAL_ATTRS-org.cytoscape.model.CyNode-1%3A+Cluster+7+%28Score%3A+2.667%29+default+node.cytable" targetJoinKey="SUID" immutable="false"/>
        <virtualColumn name="isInPath" sourceColumn="isInPath" sourceTable="36-Gob_network_lfc1.txt/SHARED_ATTRS-org.cytoscape.model.CyNode-36+shared+node.cytable" sourceJoinKey="SUID" targetTable="21431-1%3A+Cluster+7+%28Score%3A+2.667%29/LOCAL_ATTRS-org.cytoscape.model.CyNode-1%3A+Cluster+7+%28Score%3A+2.667%29+default+node.cytable" targetJoinKey="SUID" immutable="false"/>
        <virtualColumn name="MCODE_Cluster" sourceColumn="MCODE_Cluster" sourceTable="36-Gob_network_lfc1.txt/SHARED_ATTRS-org.cytoscape.model.CyNode-36+shared+node.cytable" sourceJoinKey="SUID" targetTable="21431-1%3A+Cluster+7+%28Score%3A+2.667%29/LOCAL_ATTRS-org.cytoscape.model.CyNode-1%3A+Cluster+7+%28Score%3A+2.667%29+default+node.cytable" targetJoinKey="SUID" immutable="false"/>
        <virtualColumn name="MCODE_Node_Status" sourceColumn="MCODE_Node_Status" sourceTable="36-Gob_network_lfc1.txt/SHARED_ATTRS-org.cytoscape.model.CyNode-36+shared+node.cytable" sourceJoinKey="SUID" targetTable="21431-1%3A+Cluster+7+%28Score%3A+2.667%29/LOCAL_ATTRS-org.cytoscape.model.CyNode-1%3A+Cluster+7+%28Score%3A+2.667%29+default+node.cytable" targetJoinKey="SUID" immutable="false"/>
        <virtualColumn name="MCODE_Score" sourceColumn="MCODE_Score" sourceTable="36-Gob_network_lfc1.txt/SHARED_ATTRS-org.cytoscape.model.CyNode-36+shared+node.cytable" sourceJoinKey="SUID" targetTable="21431-1%3A+Cluster+7+%28Score%3A+2.667%29/LOCAL_ATTRS-org.cytoscape.model.CyNode-1%3A+Cluster+7+%28Score%3A+2.667%29+default+node.cytable" targetJoinKey="SUID" immutable="false"/>
        <virtualColumn name="Cluster" sourceColumn="Cluster" sourceTable="36-Gob_network_lfc1.txt/SHARED_ATTRS-org.cytoscape.model.CyNode-36+shared+node.cytable" sourceJoinKey="SUID" targetTable="21431-1%3A+Cluster+7+%28Score%3A+2.667%29/LOCAL_ATTRS-org.cytoscape.model.CyNode-1%3A+Cluster+7+%28Score%3A+2.667%29+default+node.cytable" targetJoinKey="SUID" immutable="false"/>
        <virtualColumn name="Node_Status" sourceColumn="Node_Status" sourceTable="36-Gob_network_lfc1.txt/SHARED_ATTRS-org.cytoscape.model.CyNode-36+shared+node.cytable" sourceJoinKey="SUID" targetTable="21431-1%3A+Cluster+7+%28Score%3A+2.667%29/LOCAL_ATTRS-org.cytoscape.model.CyNode-1%3A+Cluster+7+%28Score%3A+2.667%29+default+node.cytable" targetJoinKey="SUID" immutable="false"/>
        <virtualColumn name="Score" sourceColumn="Score" sourceTable="36-Gob_network_lfc1.txt/SHARED_ATTRS-org.cytoscape.model.CyNode-36+shared+node.cytable" sourceJoinKey="SUID" targetTable="21431-1%3A+Cluster+7+%28Score%3A+2.667%29/LOCAL_ATTRS-org.cytoscape.model.CyNode-1%3A+Cluster+7+%28Score%3A+2.667%29+default+node.cytable" targetJoinKey="SUID" immutable="false"/>
        <virtualColumn name="genesymbol" sourceColumn="genesymbol" sourceTable="36-Gob_network_lfc1.txt/SHARED_ATTRS-org.cytoscape.model.CyNode-36+shared+node.cytable" sourceJoinKey="SUID" targetTable="21431-1%3A+Cluster+7+%28Score%3A+2.667%29/LOCAL_ATTRS-org.cytoscape.model.CyNode-1%3A+Cluster+7+%28Score%3A+2.667%29+default+node.cytable" targetJoinKey="SUID" immutable="false"/>
        <virtualColumn name="chea3_Rank" sourceColumn="chea3_Rank" sourceTable="36-Gob_network_lfc1.txt/SHARED_ATTRS-org.cytoscape.model.CyNode-36+shared+node.cytable" sourceJoinKey="SUID" targetTable="21431-1%3A+Cluster+7+%28Score%3A+2.667%29/LOCAL_ATTRS-org.cytoscape.model.CyNode-1%3A+Cluster+7+%28Score%3A+2.667%29+default+node.cytable" targetJoinKey="SUID" immutable="false"/>
        <virtualColumn name="chea3_Score" sourceColumn="chea3_Score" sourceTable="36-Gob_network_lfc1.txt/SHARED_ATTRS-org.cytoscape.model.CyNode-36+shared+node.cytable" sourceJoinKey="SUID" targetTable="21431-1%3A+Cluster+7+%28Score%3A+2.667%29/LOCAL_ATTRS-org.cytoscape.model.CyNode-1%3A+Cluster+7+%28Score%3A+2.667%29+default+node.cytable" targetJoinKey="SUID" immutable="false"/>
        <virtualColumn name="chea3_Library" sourceColumn="chea3_Library" sourceTable="36-Gob_network_lfc1.txt/SHARED_ATTRS-org.cytoscape.model.CyNode-36+shared+node.cytable" sourceJoinKey="SUID" targetTable="21431-1%3A+Cluster+7+%28Score%3A+2.667%29/LOCAL_ATTRS-org.cytoscape.model.CyNode-1%3A+Cluster+7+%28Score%3A+2.667%29+default+node.cytable" targetJoinKey="SUID" immutable="false"/>
        <virtualColumn name="chea3_Overlapping_Genes" sourceColumn="chea3_Overlapping_Genes" sourceTable="36-Gob_network_lfc1.txt/SHARED_ATTRS-org.cytoscape.model.CyNode-36+shared+node.cytable" sourceJoinKey="SUID" targetTable="21431-1%3A+Cluster+7+%28Score%3A+2.667%29/LOCAL_ATTRS-org.cytoscape.model.CyNode-1%3A+Cluster+7+%28Score%3A+2.667%29+default+node.cytable" targetJoinKey="SUID" immutable="false"/>
        <virtualColumn name="shared name" sourceColumn="shared name" sourceTable="36-Gob_network_lfc1.txt/SHARED_ATTRS-org.cytoscape.model.CyNetwork-36+shared+network.cytable" sourceJoinKey="SUID" targetTable="62-Gob_network_lfc1.txt/LOCAL_ATTRS-org.cytoscape.model.CyNetwork-Gob_network_lfc1.txt+default+network.cytable" targetJoinKey="SUID" immutable="false"/>
        <virtualColumn name="shared name" sourceColumn="shared name" sourceTable="36-Gob_network_lfc1.txt/SHARED_ATTRS-org.cytoscape.model.CyNetwork-36+shared+network.cytable" sourceJoinKey="SUID" targetTable="21431-1%3A+Cluster+7+%28Score%3A+2.667%29/LOCAL_ATTRS-org.cytoscape.model.CyNetwork-1%3A+Cluster+7+%28Score%3A+2.667%29+default+network.cytable" targetJoinKey="SUID" immutable="false"/>
        <virtualColumn name="shared name" sourceColumn="shared name" sourceTable="36-Gob_network_lfc1.txt/SHARED_ATTRS-org.cytoscape.model.CyEdge-36+shared+edge.cytable" sourceJoinKey="SUID" targetTable="21401-1%3A+Cluster+4+%28Score%3A+3.714%29/LOCAL_ATTRS-org.cytoscape.model.CyEdge-1%3A+Cluster+4+%28Score%3A+3.714%29+default+edge.cytable" targetJoinKey="SUID" immutable="false"/>
        <virtualColumn name="shared interaction" sourceColumn="shared interaction" sourceTable="36-Gob_network_lfc1.txt/SHARED_ATTRS-org.cytoscape.model.CyEdge-36+shared+edge.cytable" sourceJoinKey="SUID" targetTable="21401-1%3A+Cluster+4+%28Score%3A+3.714%29/LOCAL_ATTRS-org.cytoscape.model.CyEdge-1%3A+Cluster+4+%28Score%3A+3.714%29+default+edge.cytable" targetJoinKey="SUID" immutable="false"/>
        <virtualColumn name="isInPath" sourceColumn="isInPath" sourceTable="36-Gob_network_lfc1.txt/SHARED_ATTRS-org.cytoscape.model.CyEdge-36+shared+edge.cytable" sourceJoinKey="SUID" targetTable="21401-1%3A+Cluster+4+%28Score%3A+3.714%29/LOCAL_ATTRS-org.cytoscape.model.CyEdge-1%3A+Cluster+4+%28Score%3A+3.714%29+default+edge.cytable" targetJoinKey="SUID" immutable="false"/>
        <virtualColumn name="Module_Edge_Color" sourceColumn="Module_Edge_Color" sourceTable="36-Gob_network_lfc1.txt/SHARED_ATTRS-org.cytoscape.model.CyEdge-36+shared+edge.cytable" sourceJoinKey="SUID" targetTable="21401-1%3A+Cluster+4+%28Score%3A+3.714%29/LOCAL_ATTRS-org.cytoscape.model.CyEdge-1%3A+Cluster+4+%28Score%3A+3.714%29+default+edge.cytable" targetJoinKey="SUID" immutable="false"/>
        <virtualColumn name="shared name" sourceColumn="shared name" sourceTable="36-Gob_network_lfc1.txt/SHARED_ATTRS-org.cytoscape.model.CyNetwork-36+shared+network.cytable" sourceJoinKey="SUID" targetTable="21381-1%3A+Cluster+1+%28Score%3A+8.022%29/LOCAL_ATTRS-org.cytoscape.model.CyNetwork-1%3A+Cluster+1+%28Score%3A+8.022%29+default+network.cytable" targetJoinKey="SUID" immutable="false"/>
        <virtualColumn name="shared name" sourceColumn="shared name" sourceTable="36-Gob_network_lfc1.txt/SHARED_ATTRS-org.cytoscape.model.CyNetwork-36+shared+network.cytable" sourceJoinKey="SUID" targetTable="21411-1%3A+Cluster+5+%28Score%3A+3.333%29/LOCAL_ATTRS-org.cytoscape.model.CyNetwork-1%3A+Cluster+5+%28Score%3A+3.333%29+default+network.cytable" targetJoinKey="SUID" immutable="false"/>
        <virtualColumn name="shared name" sourceColumn="shared name" sourceTable="36-Gob_network_lfc1.txt/SHARED_ATTRS-org.cytoscape.model.CyNetwork-36+shared+network.cytable" sourceJoinKey="SUID" targetTable="21401-1%3A+Cluster+4+%28Score%3A+3.714%29/LOCAL_ATTRS-org.cytoscape.model.CyNetwork-1%3A+Cluster+4+%28Score%3A+3.714%29+default+network.cytable" targetJoinKey="SUID" immutable="false"/>
        <virtualColumn name="shared name" sourceColumn="shared name" sourceTable="36-Gob_network_lfc1.txt/SHARED_ATTRS-org.cytoscape.model.CyEdge-36+shared+edge.cytable" sourceJoinKey="SUID" targetTable="21421-1%3A+Cluster+6+%28Score%3A+2.667%29/LOCAL_ATTRS-org.cytoscape.model.CyEdge-1%3A+Cluster+6+%28Score%3A+2.667%29+default+edge.cytable" targetJoinKey="SUID" immutable="false"/>
        <virtualColumn name="shared interaction" sourceColumn="shared interaction" sourceTable="36-Gob_network_lfc1.txt/SHARED_ATTRS-org.cytoscape.model.CyEdge-36+shared+edge.cytable" sourceJoinKey="SUID" targetTable="21421-1%3A+Cluster+6+%28Score%3A+2.667%29/LOCAL_ATTRS-org.cytoscape.model.CyEdge-1%3A+Cluster+6+%28Score%3A+2.667%29+default+edge.cytable" targetJoinKey="SUID" immutable="false"/>
        <virtualColumn name="isInPath" sourceColumn="isInPath" sourceTable="36-Gob_network_lfc1.txt/SHARED_ATTRS-org.cytoscape.model.CyEdge-36+shared+edge.cytable" sourceJoinKey="SUID" targetTable="21421-1%3A+Cluster+6+%28Score%3A+2.667%29/LOCAL_ATTRS-org.cytoscape.model.CyEdge-1%3A+Cluster+6+%28Score%3A+2.667%29+default+edge.cytable" targetJoinKey="SUID" immutable="false"/>
        <virtualColumn name="Module_Edge_Color" sourceColumn="Module_Edge_Color" sourceTable="36-Gob_network_lfc1.txt/SHARED_ATTRS-org.cytoscape.model.CyEdge-36+shared+edge.cytable" sourceJoinKey="SUID" targetTable="21421-1%3A+Cluster+6+%28Score%3A+2.667%29/LOCAL_ATTRS-org.cytoscape.model.CyEdge-1%3A+Cluster+6+%28Score%3A+2.667%29+default+edge.cytable" targetJoinKey="SUID" immutable="false"/>
        <virtualColumn name="shared name" sourceColumn="shared name" sourceTable="36-Gob_network_lfc1.txt/SHARED_ATTRS-org.cytoscape.model.CyEdge-36+shared+edge.cytable" sourceJoinKey="SUID" targetTable="36-Gob_network_lfc1.txt/LOCAL_ATTRS-org.cytoscape.model.CyEdge-36+default+edge.cytable" targetJoinKey="SUID" immutable="false"/>
        <virtualColumn name="shared interaction" sourceColumn="shared interaction" sourceTable="36-Gob_network_lfc1.txt/SHARED_ATTRS-org.cytoscape.model.CyEdge-36+shared+edge.cytable" sourceJoinKey="SUID" targetTable="36-Gob_network_lfc1.txt/LOCAL_ATTRS-org.cytoscape.model.CyEdge-36+default+edge.cytable" targetJoinKey="SUID" immutable="false"/>
        <virtualColumn name="isInPath" sourceColumn="isInPath" sourceTable="36-Gob_network_lfc1.txt/SHARED_ATTRS-org.cytoscape.model.CyEdge-36+shared+edge.cytable" sourceJoinKey="SUID" targetTable="36-Gob_network_lfc1.txt/LOCAL_ATTRS-org.cytoscape.model.CyEdge-36+default+edge.cytable" targetJoinKey="SUID" immutable="false"/>
        <virtualColumn name="Module_Edge_Color" sourceColumn="Module_Edge_Color" sourceTable="36-Gob_network_lfc1.txt/SHARED_ATTRS-org.cytoscape.model.CyEdge-36+shared+edge.cytable" sourceJoinKey="SUID" targetTable="36-Gob_network_lfc1.txt/LOCAL_ATTRS-org.cytoscape.model.CyEdge-36+default+edge.cytable" targetJoinKey="SUID" immutable="false"/>
        <virtualColumn name="shared name" sourceColumn="shared name" sourceTable="36-Gob_network_lfc1.txt/SHARED_ATTRS-org.cytoscape.model.CyNode-36+shared+node.cytable" sourceJoinKey="SUID" targetTable="52-52/LOCAL_ATTRS-org.cytoscape.model.CyNode-52+default+node.cytable" targetJoinKey="SUID" immutable="false"/>
        <virtualColumn name="isExcludedFromPaths" sourceColumn="isExcludedFromPaths" sourceTable="36-Gob_network_lfc1.txt/SHARED_ATTRS-org.cytoscape.model.CyNode-36+shared+node.cytable" sourceJoinKey="SUID" targetTable="52-52/LOCAL_ATTRS-org.cytoscape.model.CyNode-52+default+node.cytable" targetJoinKey="SUID" immutable="false"/>
        <virtualColumn name="isInPath" sourceColumn="isInPath" sourceTable="36-Gob_network_lfc1.txt/SHARED_ATTRS-org.cytoscape.model.CyNode-36+shared+node.cytable" sourceJoinKey="SUID" targetTable="52-52/LOCAL_ATTRS-org.cytoscape.model.CyNode-52+default+node.cytable" targetJoinKey="SUID" immutable="false"/>
        <virtualColumn name="MCODE_Cluster" sourceColumn="MCODE_Cluster" sourceTable="36-Gob_network_lfc1.txt/SHARED_ATTRS-org.cytoscape.model.CyNode-36+shared+node.cytable" sourceJoinKey="SUID" targetTable="52-52/LOCAL_ATTRS-org.cytoscape.model.CyNode-52+default+node.cytable" targetJoinKey="SUID" immutable="false"/>
        <virtualColumn name="MCODE_Node_Status" sourceColumn="MCODE_Node_Status" sourceTable="36-Gob_network_lfc1.txt/SHARED_ATTRS-org.cytoscape.model.CyNode-36+shared+node.cytable" sourceJoinKey="SUID" targetTable="52-52/LOCAL_ATTRS-org.cytoscape.model.CyNode-52+default+node.cytable" targetJoinKey="SUID" immutable="false"/>
        <virtualColumn name="MCODE_Score" sourceColumn="MCODE_Score" sourceTable="36-Gob_network_lfc1.txt/SHARED_ATTRS-org.cytoscape.model.CyNode-36+shared+node.cytable" sourceJoinKey="SUID" targetTable="52-52/LOCAL_ATTRS-org.cytoscape.model.CyNode-52+default+node.cytable" targetJoinKey="SUID" immutable="false"/>
        <virtualColumn name="Cluster" sourceColumn="Cluster" sourceTable="36-Gob_network_lfc1.txt/SHARED_ATTRS-org.cytoscape.model.CyNode-36+shared+node.cytable" sourceJoinKey="SUID" targetTable="52-52/LOCAL_ATTRS-org.cytoscape.model.CyNode-52+default+node.cytable" targetJoinKey="SUID" immutable="false"/>
        <virtualColumn name="Node_Status" sourceColumn="Node_Status" sourceTable="36-Gob_network_lfc1.txt/SHARED_ATTRS-org.cytoscape.model.CyNode-36+shared+node.cytable" sourceJoinKey="SUID" targetTable="52-52/LOCAL_ATTRS-org.cytoscape.model.CyNode-52+default+node.cytable" targetJoinKey="SUID" immutable="false"/>
        <virtualColumn name="Score" sourceColumn="Score" sourceTable="36-Gob_network_lfc1.txt/SHARED_ATTRS-org.cytoscape.model.CyNode-36+shared+node.cytable" sourceJoinKey="SUID" targetTable="52-52/LOCAL_ATTRS-org.cytoscape.model.CyNode-52+default+node.cytable" targetJoinKey="SUID" immutable="false"/>
        <virtualColumn name="genesymbol" sourceColumn="genesymbol" sourceTable="36-Gob_network_lfc1.txt/SHARED_ATTRS-org.cytoscape.model.CyNode-36+shared+node.cytable" sourceJoinKey="SUID" targetTable="52-52/LOCAL_ATTRS-org.cytoscape.model.CyNode-52+default+node.cytable" targetJoinKey="SUID" immutable="false"/>
        <virtualColumn name="chea3_Rank" sourceColumn="chea3_Rank" sourceTable="36-Gob_network_lfc1.txt/SHARED_ATTRS-org.cytoscape.model.CyNode-36+shared+node.cytable" sourceJoinKey="SUID" targetTable="52-52/LOCAL_ATTRS-org.cytoscape.model.CyNode-52+default+node.cytable" targetJoinKey="SUID" immutable="false"/>
        <virtualColumn name="chea3_Score" sourceColumn="chea3_Score" sourceTable="36-Gob_network_lfc1.txt/SHARED_ATTRS-org.cytoscape.model.CyNode-36+shared+node.cytable" sourceJoinKey="SUID" targetTable="52-52/LOCAL_ATTRS-org.cytoscape.model.CyNode-52+default+node.cytable" targetJoinKey="SUID" immutable="false"/>
        <virtualColumn name="chea3_Library" sourceColumn="chea3_Library" sourceTable="36-Gob_network_lfc1.txt/SHARED_ATTRS-org.cytoscape.model.CyNode-36+shared+node.cytable" sourceJoinKey="SUID" targetTable="52-52/LOCAL_ATTRS-org.cytoscape.model.CyNode-52+default+node.cytable" targetJoinKey="SUID" immutable="false"/>
        <virtualColumn name="chea3_Overlapping_Genes" sourceColumn="chea3_Overlapping_Genes" sourceTable="36-Gob_network_lfc1.txt/SHARED_ATTRS-org.cytoscape.model.CyNode-36+shared+node.cytable" sourceJoinKey="SUID" targetTable="52-52/LOCAL_ATTRS-org.cytoscape.model.CyNode-52+default+node.cytable" targetJoinKey="SUID" immutable="false"/>
        <virtualColumn name="shared name" sourceColumn="shared name" sourceTable="36-Gob_network_lfc1.txt/SHARED_ATTRS-org.cytoscape.model.CyEdge-36+shared+edge.cytable" sourceJoinKey="SUID" targetTable="21381-1%3A+Cluster+1+%28Score%3A+8.022%29/LOCAL_ATTRS-org.cytoscape.model.CyEdge-1%3A+Cluster+1+%28Score%3A+8.022%29+default+edge.cytable" targetJoinKey="SUID" immutable="false"/>
        <virtualColumn name="shared interaction" sourceColumn="shared interaction" sourceTable="36-Gob_network_lfc1.txt/SHARED_ATTRS-org.cytoscape.model.CyEdge-36+shared+edge.cytable" sourceJoinKey="SUID" targetTable="21381-1%3A+Cluster+1+%28Score%3A+8.022%29/LOCAL_ATTRS-org.cytoscape.model.CyEdge-1%3A+Cluster+1+%28Score%3A+8.022%29+default+edge.cytable" targetJoinKey="SUID" immutable="false"/>
        <virtualColumn name="isInPath" sourceColumn="isInPath" sourceTable="36-Gob_network_lfc1.txt/SHARED_ATTRS-org.cytoscape.model.CyEdge-36+shared+edge.cytable" sourceJoinKey="SUID" targetTable="21381-1%3A+Cluster+1+%28Score%3A+8.022%29/LOCAL_ATTRS-org.cytoscape.model.CyEdge-1%3A+Cluster+1+%28Score%3A+8.022%29+default+edge.cytable" targetJoinKey="SUID" immutable="false"/>
        <virtualColumn name="Module_Edge_Color" sourceColumn="Module_Edge_Color" sourceTable="36-Gob_network_lfc1.txt/SHARED_ATTRS-org.cytoscape.model.CyEdge-36+shared+edge.cytable" sourceJoinKey="SUID" targetTable="21381-1%3A+Cluster+1+%28Score%3A+8.022%29/LOCAL_ATTRS-org.cytoscape.model.CyEdge-1%3A+Cluster+1+%28Score%3A+8.022%29+default+edge.cytable" targetJoinKey="SUID" immutable="false"/>
        <virtualColumn name="shared name" sourceColumn="shared name" sourceTable="36-Gob_network_lfc1.txt/SHARED_ATTRS-org.cytoscape.model.CyNode-36+shared+node.cytable" sourceJoinKey="SUID" targetTable="21401-1%3A+Cluster+4+%28Score%3A+3.714%29/LOCAL_ATTRS-org.cytoscape.model.CyNode-1%3A+Cluster+4+%28Score%3A+3.714%29+default+node.cytable" targetJoinKey="SUID" immutable="false"/>
        <virtualColumn name="isExcludedFromPaths" sourceColumn="isExcludedFromPaths" sourceTable="36-Gob_network_lfc1.txt/SHARED_ATTRS-org.cytoscape.model.CyNode-36+shared+node.cytable" sourceJoinKey="SUID" targetTable="21401-1%3A+Cluster+4+%28Score%3A+3.714%29/LOCAL_ATTRS-org.cytoscape.model.CyNode-1%3A+Cluster+4+%28Score%3A+3.714%29+default+node.cytable" targetJoinKey="SUID" immutable="false"/>
        <virtualColumn name="isInPath" sourceColumn="isInPath" sourceTable="36-Gob_network_lfc1.txt/SHARED_ATTRS-org.cytoscape.model.CyNode-36+shared+node.cytable" sourceJoinKey="SUID" targetTable="21401-1%3A+Cluster+4+%28Score%3A+3.714%29/LOCAL_ATTRS-org.cytoscape.model.CyNode-1%3A+Cluster+4+%28Score%3A+3.714%29+default+node.cytable" targetJoinKey="SUID" immutable="false"/>
        <virtualColumn name="MCODE_Cluster" sourceColumn="MCODE_Cluster" sourceTable="36-Gob_network_lfc1.txt/SHARED_ATTRS-org.cytoscape.model.CyNode-36+shared+node.cytable" sourceJoinKey="SUID" targetTable="21401-1%3A+Cluster+4+%28Score%3A+3.714%29/LOCAL_ATTRS-org.cytoscape.model.CyNode-1%3A+Cluster+4+%28Score%3A+3.714%29+default+node.cytable" targetJoinKey="SUID" immutable="false"/>
        <virtualColumn name="MCODE_Node_Status" sourceColumn="MCODE_Node_Status" sourceTable="36-Gob_network_lfc1.txt/SHARED_ATTRS-org.cytoscape.model.CyNode-36+shared+node.cytable" sourceJoinKey="SUID" targetTable="21401-1%3A+Cluster+4+%28Score%3A+3.714%29/LOCAL_ATTRS-org.cytoscape.model.CyNode-1%3A+Cluster+4+%28Score%3A+3.714%29+default+node.cytable" targetJoinKey="SUID" immutable="false"/>
        <virtualColumn name="MCODE_Score" sourceColumn="MCODE_Score" sourceTable="36-Gob_network_lfc1.txt/SHARED_ATTRS-org.cytoscape.model.CyNode-36+shared+node.cytable" sourceJoinKey="SUID" targetTable="21401-1%3A+Cluster+4+%28Score%3A+3.714%29/LOCAL_ATTRS-org.cytoscape.model.CyNode-1%3A+Cluster+4+%28Score%3A+3.714%29+default+node.cytable" targetJoinKey="SUID" immutable="false"/>
        <virtualColumn name="Cluster" sourceColumn="Cluster" sourceTable="36-Gob_network_lfc1.txt/SHARED_ATTRS-org.cytoscape.model.CyNode-36+shared+node.cytable" sourceJoinKey="SUID" targetTable="21401-1%3A+Cluster+4+%28Score%3A+3.714%29/LOCAL_ATTRS-org.cytoscape.model.CyNode-1%3A+Cluster+4+%28Score%3A+3.714%29+default+node.cytable" targetJoinKey="SUID" immutable="false"/>
        <virtualColumn name="Node_Status" sourceColumn="Node_Status" sourceTable="36-Gob_network_lfc1.txt/SHARED_ATTRS-org.cytoscape.model.CyNode-36+shared+node.cytable" sourceJoinKey="SUID" targetTable="21401-1%3A+Cluster+4+%28Score%3A+3.714%29/LOCAL_ATTRS-org.cytoscape.model.CyNode-1%3A+Cluster+4+%28Score%3A+3.714%29+default+node.cytable" targetJoinKey="SUID" immutable="false"/>
        <virtualColumn name="Score" sourceColumn="Score" sourceTable="36-Gob_network_lfc1.txt/SHARED_ATTRS-org.cytoscape.model.CyNode-36+shared+node.cytable" sourceJoinKey="SUID" targetTable="21401-1%3A+Cluster+4+%28Score%3A+3.714%29/LOCAL_ATTRS-org.cytoscape.model.CyNode-1%3A+Cluster+4+%28Score%3A+3.714%29+default+node.cytable" targetJoinKey="SUID" immutable="false"/>
        <virtualColumn name="genesymbol" sourceColumn="genesymbol" sourceTable="36-Gob_network_lfc1.txt/SHARED_ATTRS-org.cytoscape.model.CyNode-36+shared+node.cytable" sourceJoinKey="SUID" targetTable="21401-1%3A+Cluster+4+%28Score%3A+3.714%29/LOCAL_ATTRS-org.cytoscape.model.CyNode-1%3A+Cluster+4+%28Score%3A+3.714%29+default+node.cytable" targetJoinKey="SUID" immutable="false"/>
        <virtualColumn name="chea3_Rank" sourceColumn="chea3_Rank" sourceTable="36-Gob_network_lfc1.txt/SHARED_ATTRS-org.cytoscape.model.CyNode-36+shared+node.cytable" sourceJoinKey="SUID" targetTable="21401-1%3A+Cluster+4+%28Score%3A+3.714%29/LOCAL_ATTRS-org.cytoscape.model.CyNode-1%3A+Cluster+4+%28Score%3A+3.714%29+default+node.cytable" targetJoinKey="SUID" immutable="false"/>
        <virtualColumn name="chea3_Score" sourceColumn="chea3_Score" sourceTable="36-Gob_network_lfc1.txt/SHARED_ATTRS-org.cytoscape.model.CyNode-36+shared+node.cytable" sourceJoinKey="SUID" targetTable="21401-1%3A+Cluster+4+%28Score%3A+3.714%29/LOCAL_ATTRS-org.cytoscape.model.CyNode-1%3A+Cluster+4+%28Score%3A+3.714%29+default+node.cytable" targetJoinKey="SUID" immutable="false"/>
        <virtualColumn name="chea3_Library" sourceColumn="chea3_Library" sourceTable="36-Gob_network_lfc1.txt/SHARED_ATTRS-org.cytoscape.model.CyNode-36+shared+node.cytable" sourceJoinKey="SUID" targetTable="21401-1%3A+Cluster+4+%28Score%3A+3.714%29/LOCAL_ATTRS-org.cytoscape.model.CyNode-1%3A+Cluster+4+%28Score%3A+3.714%29+default+node.cytable" targetJoinKey="SUID" immutable="false"/>
        <virtualColumn name="chea3_Overlapping_Genes" sourceColumn="chea3_Overlapping_Genes" sourceTable="36-Gob_network_lfc1.txt/SHARED_ATTRS-org.cytoscape.model.CyNode-36+shared+node.cytable" sourceJoinKey="SUID" targetTable="21401-1%3A+Cluster+4+%28Score%3A+3.714%29/LOCAL_ATTRS-org.cytoscape.model.CyNode-1%3A+Cluster+4+%28Score%3A+3.714%29+default+node.cytable" targetJoinKey="SUID" immutable="false"/>
        <virtualColumn name="shared name" sourceColumn="shared name" sourceTable="36-Gob_network_lfc1.txt/SHARED_ATTRS-org.cytoscape.model.CyEdge-36+shared+edge.cytable" sourceJoinKey="SUID" targetTable="21431-1%3A+Cluster+7+%28Score%3A+2.667%29/LOCAL_ATTRS-org.cytoscape.model.CyEdge-1%3A+Cluster+7+%28Score%3A+2.667%29+default+edge.cytable" targetJoinKey="SUID" immutable="false"/>
        <virtualColumn name="shared interaction" sourceColumn="shared interaction" sourceTable="36-Gob_network_lfc1.txt/SHARED_ATTRS-org.cytoscape.model.CyEdge-36+shared+edge.cytable" sourceJoinKey="SUID" targetTable="21431-1%3A+Cluster+7+%28Score%3A+2.667%29/LOCAL_ATTRS-org.cytoscape.model.CyEdge-1%3A+Cluster+7+%28Score%3A+2.667%29+default+edge.cytable" targetJoinKey="SUID" immutable="false"/>
        <virtualColumn name="isInPath" sourceColumn="isInPath" sourceTable="36-Gob_network_lfc1.txt/SHARED_ATTRS-org.cytoscape.model.CyEdge-36+shared+edge.cytable" sourceJoinKey="SUID" targetTable="21431-1%3A+Cluster+7+%28Score%3A+2.667%29/LOCAL_ATTRS-org.cytoscape.model.CyEdge-1%3A+Cluster+7+%28Score%3A+2.667%29+default+edge.cytable" targetJoinKey="SUID" immutable="false"/>
        <virtualColumn name="Module_Edge_Color" sourceColumn="Module_Edge_Color" sourceTable="36-Gob_network_lfc1.txt/SHARED_ATTRS-org.cytoscape.model.CyEdge-36+shared+edge.cytable" sourceJoinKey="SUID" targetTable="21431-1%3A+Cluster+7+%28Score%3A+2.667%29/LOCAL_ATTRS-org.cytoscape.model.CyEdge-1%3A+Cluster+7+%28Score%3A+2.667%29+default+edge.cytable" targetJoinKey="SUID" immutable="false"/>
        <virtualColumn name="shared name" sourceColumn="shared name" sourceTable="36-Gob_network_lfc1.txt/SHARED_ATTRS-org.cytoscape.model.CyEdge-36+shared+edge.cytable" sourceJoinKey="SUID" targetTable="62-Gob_network_lfc1.txt/LOCAL_ATTRS-org.cytoscape.model.CyEdge-Gob_network_lfc1.txt+default+edge.cytable" targetJoinKey="SUID" immutable="false"/>
        <virtualColumn name="shared interaction" sourceColumn="shared interaction" sourceTable="36-Gob_network_lfc1.txt/SHARED_ATTRS-org.cytoscape.model.CyEdge-36+shared+edge.cytable" sourceJoinKey="SUID" targetTable="62-Gob_network_lfc1.txt/LOCAL_ATTRS-org.cytoscape.model.CyEdge-Gob_network_lfc1.txt+default+edge.cytable" targetJoinKey="SUID" immutable="false"/>
        <virtualColumn name="isInPath" sourceColumn="isInPath" sourceTable="36-Gob_network_lfc1.txt/SHARED_ATTRS-org.cytoscape.model.CyEdge-36+shared+edge.cytable" sourceJoinKey="SUID" targetTable="62-Gob_network_lfc1.txt/LOCAL_ATTRS-org.cytoscape.model.CyEdge-Gob_network_lfc1.txt+default+edge.cytable" targetJoinKey="SUID" immutable="false"/>
        <virtualColumn name="Module_Edge_Color" sourceColumn="Module_Edge_Color" sourceTable="36-Gob_network_lfc1.txt/SHARED_ATTRS-org.cytoscape.model.CyEdge-36+shared+edge.cytable" sourceJoinKey="SUID" targetTable="62-Gob_network_lfc1.txt/LOCAL_ATTRS-org.cytoscape.model.CyEdge-Gob_network_lfc1.txt+default+edge.cytable" targetJoinKey="SUID" immutable="false"/>
    </virtualColumns>
</cyTables>
