# Supplementary material for: Regulatory network analysis of Paneth cell and goblet cell enriched gut organoids using transcriptomics approaches
Source: Royal Society of Chemistry journal article supplement (doi:10.1039/c9mo00130a), 2019-12-10
Supplement: c9mo00130a2.cys [file c9mo00130a2.cys › CytoscapeSession-2019_09_26-21_57/views/62-23331-Gob_network_lfc1.txt.xgmml]

<?xml version="1.0" encoding="UTF-8" standalone="yes"?>
<graph id="23331" label="Gob_network_lfc1.txt" cy:view="1" cy:networkId="62" cy:visualStyle="default" cy:rendererId="org.cytoscape.ding" cy:documentVersion="3.0" xmlns:dc="http://purl.org/dc/elements/1.1/" xmlns:xlink="http://www.w3.org/1999/xlink" xmlns:rdf="http://www.w3.org/1999/02/22-rdf-syntax-ns#" xmlns:cy="http://www.cytoscape.org" xmlns="http://www.cs.rpi.edu/XGMML">
  <graphics>
    <att name="NETWORK_CENTER_Z_LOCATION" value="0.0" type="string" cy:type="String"/>
    <att name="NETWORK_WIDTH" value="658.0" type="string" cy:type="String"/>
    <att name="NETWORK_HEIGHT" value="510.0" type="string" cy:type="String"/>
    <att name="NETWORK_DEPTH" value="0.0" type="string" cy:type="String"/>
    <att name="NETWORK_CENTER_X_LOCATION" value="118.42242431640625" type="string" cy:type="String"/>
    <att name="NETWORK_TITLE" value="Gob_network_lfc1.txt" type="string" cy:type="String"/>
    <att name="NETWORK_SCALE_FACTOR" value="0.34523031274353544" type="string" cy:type="String"/>
    <att name="NETWORK_EDGE_SELECTION" value="true" type="string" cy:type="String"/>
    <att name="NETWORK_ANNOTATION_SELECTION" value="false" type="string" cy:type="String"/>
    <att name="NETWORK_CENTER_Y_LOCATION" value="27.155242919921875" type="string" cy:type="String"/>
    <att name="NETWORK_NODE_SELECTION" value="true" type="string" cy:type="String"/>
  </graphics>
  <node id="25458" label="ENSMUSG00000089774" cy:nodeId="72">
    <graphics y="122.34868924974387" x="677.3300235551815" z="0.0"/>
  </node>
  <node id="25457" label="ENSMUSG00000067377" cy:nodeId="73">
    <graphics y="295.44729154466575" x="677.0096500200252" z="0.0"/>
  </node>
  <node id="25456" label="ENSMUSG00000053931" cy:nodeId="74">
    <graphics y="216.24070279954856" x="692.161200312994" z="0.0"/>
  </node>
  <node id="25455" label="ENSMUSG00000052229" cy:nodeId="75">
    <graphics y="264.87746732591575" x="702.2995059770565" z="0.0"/>
  </node>
  <node id="25454" label="ENSMUSG00000047238" cy:nodeId="76">
    <graphics y="77.53339689134543" x="760.212225703619" z="0.0"/>
  </node>
  <node id="25453" label="ENSMUSG00000046387" cy:nodeId="77">
    <graphics y="395.015711954822" x="613.8717716020565" z="0.0"/>
  </node>
  <node id="25452" label="ENSMUSG00000043496" cy:nodeId="78">
    <graphics y="385.4009963786501" x="656.3313052934627" z="0.0"/>
  </node>
  <node id="25451" label="ENSMUSG00000044365" cy:nodeId="79">
    <graphics y="278.90517728685325" x="624.2478091997127" z="0.0"/>
  </node>
  <node id="25450" label="ENSMUSG00000036533" cy:nodeId="80">
    <graphics y="162.44030301927512" x="727.215887812994" z="0.0"/>
  </node>
  <node id="25449" label="ENSMUSG00000031748" cy:nodeId="81">
    <graphics y="130.78679960130637" x="716.8595035356502" z="0.0"/>
  </node>
  <node id="25448" label="ENSMUSG00000031202" cy:nodeId="82">
    <graphics y="212.0844375407595" x="720.5521915239315" z="0.0"/>
  </node>
  <node id="25447" label="ENSMUSG00000026558" cy:nodeId="83">
    <graphics y="445.0544082438845" x="544.2750919145565" z="0.0"/>
  </node>
  <node id="25446" label="ENSMUSG00000022369" cy:nodeId="84">
    <graphics y="51.61492460130637" x="714.9077213090877" z="0.0"/>
  </node>
  <node id="25445" label="ENSMUSG00000021266" cy:nodeId="85">
    <graphics y="286.5058547770876" x="725.9525821489315" z="0.0"/>
  </node>
  <node id="25444" label="ENSMUSG00000020848" cy:nodeId="86">
    <graphics y="11.850512675036839" x="697.730780391119" z="0.0"/>
  </node>
  <node id="25443" label="ENSMUSG00000021062" cy:nodeId="87">
    <graphics y="138.12140958665793" x="759.9314029497127" z="0.0"/>
  </node>
  <node id="25442" label="ENSMUSG00000018698" cy:nodeId="88">
    <graphics y="242.0922500407595" x="736.9737613481502" z="0.0"/>
  </node>
  <node id="25441" label="ENSMUSG00000014813" cy:nodeId="89">
    <graphics y="332.6903030192751" x="689.874335078619" z="0.0"/>
  </node>
  <node id="25440" label="ENSMUSG00000060935" cy:nodeId="90">
    <graphics y="-174.49542696119363" x="484.1684634965877" z="0.0"/>
  </node>
  <node id="25439" label="ENSMUSG00000048482" cy:nodeId="91">
    <graphics y="-425.88388521314675" x="463.0878970903377" z="0.0"/>
  </node>
  <node id="25438" label="ENSMUSG00000028463" cy:nodeId="92">
    <graphics y="45.28673093675559" x="625.6352603715877" z="0.0"/>
  </node>
  <node id="25437" label="ENSMUSG00000024691" cy:nodeId="93">
    <graphics y="-3.5552757465940203" x="385.83991125049397" z="0.0"/>
  </node>
  <node id="25436" label="ENSMUSG00000022711" cy:nodeId="94">
    <graphics y="-419.74518282056863" x="580.811102656744" z="0.0"/>
  </node>
  <node id="25435" label="ENSMUSG00000021373" cy:nodeId="95">
    <graphics y="-529.5596054279905" x="453.8724429887752" z="0.0"/>
  </node>
  <node id="25434" label="ENSMUSG00000000058" cy:nodeId="96">
    <graphics y="-211.0929763996702" x="717.1124332231502" z="0.0"/>
  </node>
  <node id="25433" label="ENSMUSG00000068923" cy:nodeId="97">
    <graphics y="-510.3823288166624" x="644.7329166215877" z="0.0"/>
  </node>
  <node id="25432" label="ENSMUSG00000039485" cy:nodeId="98">
    <graphics y="-77.02169496656472" x="587.6832950395565" z="0.0"/>
  </node>
  <node id="25431" label="mmu-miR-125b-1-3p" cy:nodeId="99">
    <graphics y="-324.96054536939675" x="282.5869205278377" z="0.0"/>
  </node>
  <node id="25430" label="ENSMUSG00000080316" cy:nodeId="100">
    <graphics y="-530.8683471679688" x="897.6960115825697" z="0.0"/>
  </node>
  <node id="25429" label="mmu-miR-221-5p" cy:nodeId="101">
    <graphics y="-638.6077270507812" x="900.0175447856947" z="0.0"/>
  </node>
  <node id="25428" label="mmu-miR-134-5p" cy:nodeId="102">
    <graphics y="582.131678751697" x="336.31085851611897" z="0.0"/>
  </node>
  <node id="25427" label="ENSMUSG00000054252" cy:nodeId="103">
    <graphics y="-169.471348592053" x="753.371161250494" z="0.0"/>
  </node>
  <node id="25426" label="ENSMUSG00000044068" cy:nodeId="104">
    <graphics y="-373.14340669752175" x="574.7899844926815" z="0.0"/>
  </node>
  <node id="25425" label="ENSMUSG00000030946" cy:nodeId="105">
    <graphics y="-310.9216354572874" x="619.2648380083065" z="0.0"/>
  </node>
  <node id="25424" label="ENSMUSG00000028737" cy:nodeId="106">
    <graphics y="-16.508608647594997" x="752.2257755083065" z="0.0"/>
  </node>
  <node id="25423" label="ENSMUSG00000027248" cy:nodeId="107">
    <graphics y="-277.11130220533425" x="420.7978580278377" z="0.0"/>
  </node>
  <node id="25422" label="ENSMUSG00000028207" cy:nodeId="108">
    <graphics y="-560.298741170178" x="345.8421695512752" z="0.0"/>
  </node>
  <node id="25421" label="ENSMUSG00000022231" cy:nodeId="109">
    <graphics y="-1.2291820728879657" x="578.2113101762752" z="0.0"/>
  </node>
  <node id="25420" label="ENSMUSG00000020101" cy:nodeId="110">
    <graphics y="-351.7155807697874" x="538.0370548051815" z="0.0"/>
  </node>
  <node id="25419" label="ENSMUSG00000057315" cy:nodeId="111">
    <graphics y="117.88637845872825" x="518.234198359869" z="0.0"/>
  </node>
  <node id="25418" label="ENSMUSG00000063160" cy:nodeId="112">
    <graphics y="-529.4155624592405" x="-91.51393243847087" z="0.0"/>
  </node>
  <node id="25417" label="ENSMUSG00000046743" cy:nodeId="113">
    <graphics y="142.35622709154075" x="581.5844791215877" z="0.0"/>
  </node>
  <node id="25416" label="ENSMUSG00000032557" cy:nodeId="114">
    <graphics y="284.01665799974387" x="560.9252383989315" z="0.0"/>
  </node>
  <node id="25415" label="ENSMUSG00000027699" cy:nodeId="115">
    <graphics y="252.29580228685325" x="509.40766027393147" z="0.0"/>
  </node>
  <node id="25414" label="ENSMUSG00000026797" cy:nodeId="116">
    <graphics y="-559.092442342053" x="-444.38958093700603" z="0.0"/>
  </node>
  <node id="25413" label="ENSMUSG00000016262" cy:nodeId="117">
    <graphics y="569.3952285563845" x="-312.0533382612248" z="0.0"/>
  </node>
  <node id="25412" label="ENSMUSG00000001105" cy:nodeId="118">
    <graphics y="591.9309341227907" x="263.7144840044002" z="0.0"/>
  </node>
  <node id="25411" label="mmu-miR-676-3p" cy:nodeId="119">
    <graphics y="640.2566177165407" x="201.61768224658772" z="0.0"/>
  </node>
  <node id="25410" label="ENSMUSG00000027947" cy:nodeId="120">
    <graphics y="-161.98093111158425" x="842.328192500494" z="0.0"/>
  </node>
  <node id="25409" label="ENSMUSG00000000751" cy:nodeId="121">
    <graphics y="24.438510111560277" x="843.9392154497127" z="0.0"/>
  </node>
  <node id="25408" label="mmu-miR-125a-5p" cy:nodeId="122">
    <graphics y="-124.36009676099832" x="364.8648746294002" z="0.0"/>
  </node>
  <node id="25407" label="ENSMUSG00000070056" cy:nodeId="123">
    <graphics y="-250.24025423170144" x="572.1947086137752" z="0.0"/>
  </node>
  <node id="25406" label="ENSMUSG00000042828" cy:nodeId="124">
    <graphics y="-170.32870943189675" x="703.5375430864315" z="0.0"/>
  </node>
  <node id="25405" label="ENSMUSG00000042367" cy:nodeId="125">
    <graphics y="-182.918614217053" x="695.932196406744" z="0.0"/>
  </node>
  <node id="25404" label="ENSMUSG00000042851" cy:nodeId="126">
    <graphics y="-341.4206894123655" x="590.214911250494" z="0.0"/>
  </node>
  <node id="25403" label="ENSMUSG00000038893" cy:nodeId="127">
    <graphics y="-347.10922701002175" x="669.991278437994" z="0.0"/>
  </node>
  <node id="25402" label="ENSMUSG00000038248" cy:nodeId="128">
    <graphics y="-41.10034639478738" x="571.2204654497127" z="0.0"/>
  </node>
  <node id="25401" label="ENSMUSG00000035274" cy:nodeId="129">
    <graphics y="-268.616612263928" x="664.9636295122127" z="0.0"/>
  </node>
  <node id="25400" label="ENSMUSG00000037239" cy:nodeId="130">
    <graphics y="-283.04184419752175" x="700.2743594926815" z="0.0"/>
  </node>
  <node id="25399" label="ENSMUSG00000033174" cy:nodeId="131">
    <graphics y="-118.34225160718972" x="465.64215734424397" z="0.0"/>
  </node>
  <node id="25398" label="ENSMUSG00000032997" cy:nodeId="132">
    <graphics y="-458.471104451428" x="466.67182043018147" z="0.0"/>
  </node>
  <node id="25397" label="ENSMUSG00000031561" cy:nodeId="133">
    <graphics y="-109.31798250318582" x="479.1364810747127" z="0.0"/>
  </node>
  <node id="25396" label="ENSMUSG00000026259" cy:nodeId="134">
    <graphics y="-256.1043747150999" x="706.919989375494" z="0.0"/>
  </node>
  <node id="25395" label="ENSMUSG00000022091" cy:nodeId="135">
    <graphics y="-481.6020553791624" x="487.73383214893147" z="0.0"/>
  </node>
  <node id="25394" label="ENSMUSG00000014444" cy:nodeId="136">
    <graphics y="-425.08856660963113" x="620.0284488481502" z="0.0"/>
  </node>
  <node id="25393" label="ENSMUSG00000015837" cy:nodeId="137">
    <graphics y="329.05361478685325" x="510.8121402544002" z="0.0"/>
  </node>
  <node id="25392" label="ENSMUSG00000009418" cy:nodeId="138">
    <graphics y="-129.7524765217405" x="418.5479800981502" z="0.0"/>
  </node>
  <node id="25391" label="mmu-miR-410-3p" cy:nodeId="139">
    <graphics y="338.78521728515625" x="-645.5936279296875" z="0.0"/>
  </node>
  <node id="25390" label="ENSMUSG00000056812" cy:nodeId="140">
    <graphics y="560.0652114665407" x="536.0094058794002" z="0.0"/>
  </node>
  <node id="25389" label="ENSMUSG00000040896" cy:nodeId="141">
    <graphics y="595.9282485759157" x="498.14252355518147" z="0.0"/>
  </node>
  <node id="25388" label="ENSMUSG00000052727" cy:nodeId="142">
    <graphics y="431.11684720872825" x="376.5323550981502" z="0.0"/>
  </node>
  <node id="25387" label="ENSMUSG00000031647" cy:nodeId="143">
    <graphics y="107.71251218675559" x="470.4387271684627" z="0.0"/>
  </node>
  <node id="25386" label="ENSMUSG00000038264" cy:nodeId="144">
    <graphics y="357.44524686693137" x="518.9729068559627" z="0.0"/>
  </node>
  <node id="25385" label="ENSMUSG00000032575" cy:nodeId="145">
    <graphics y="44.308802775134495" x="558.3385684770565" z="0.0"/>
  </node>
  <node id="25384" label="ENSMUSG00000031442" cy:nodeId="146">
    <graphics y="417.938807657947" x="565.4094302934627" z="0.0"/>
  </node>
  <node id="25383" label="ENSMUSG00000031749" cy:nodeId="147">
    <graphics y="429.5700637614626" x="630.141669062994" z="0.0"/>
  </node>
  <node id="25382" label="ENSMUSG00000036422" cy:nodeId="148">
    <graphics y="470.7963821208376" x="655.1789615434627" z="0.0"/>
  </node>
  <node id="25381" label="ENSMUSG00000026473" cy:nodeId="149">
    <graphics y="68.46532743333762" x="421.34259679736897" z="0.0"/>
  </node>
  <node id="25380" label="ENSMUSG00000025738" cy:nodeId="150">
    <graphics y="406.8293411052126" x="569.041327266119" z="0.0"/>
  </node>
  <node id="25379" label="ENSMUSG00000026235" cy:nodeId="151">
    <graphics y="252.6239883220095" x="550.017157344244" z="0.0"/>
  </node>
  <node id="25378" label="ENSMUSG00000023036" cy:nodeId="152">
    <graphics y="537.759364298572" x="563.6904361528377" z="0.0"/>
  </node>
  <node id="25377" label="ENSMUSG00000029033" cy:nodeId="153">
    <graphics y="398.63360135911887" x="420.17157628955647" z="0.0"/>
  </node>
  <node id="25376" label="ENSMUSG00000009394" cy:nodeId="154">
    <graphics y="361.6503555095095" x="455.2270572465877" z="0.0"/>
  </node>
  <node id="25375" label="mmu-miR-153-3p" cy:nodeId="155">
    <graphics y="163.26684110521262" x="227.84973791065022" z="0.0"/>
  </node>
  <node id="25374" label="ENSMUSG00000056394" cy:nodeId="156">
    <graphics y="-670.6319320881468" x="276.36173131885334" z="0.0"/>
  </node>
  <node id="25373" label="ENSMUSG00000048012" cy:nodeId="157">
    <graphics y="-656.447666951428" x="416.9469058794002" z="0.0"/>
  </node>
  <node id="25372" label="ENSMUSG00000038943" cy:nodeId="158">
    <graphics y="-679.2093246662718" x="372.9040591997127" z="0.0"/>
  </node>
  <node id="25371" label="ENSMUSG00000040699" cy:nodeId="159">
    <graphics y="-639.2587631428343" x="321.19205358447834" z="0.0"/>
  </node>
  <node id="25370" label="ENSMUSG00000040195" cy:nodeId="160">
    <graphics y="-368.564122029553" x="376.22333410205647" z="0.0"/>
  </node>
  <node id="25369" label="ENSMUSG00000038507" cy:nodeId="161">
    <graphics y="-602.189122029553" x="363.6976383012752" z="0.0"/>
  </node>
  <node id="25368" label="ENSMUSG00000038178" cy:nodeId="162">
    <graphics y="-87.39845735670144" x="323.4751956743221" z="0.0"/>
  </node>
  <node id="25367" label="ENSMUSG00000038224" cy:nodeId="163">
    <graphics y="-443.7930038654905" x="322.71109655322834" z="0.0"/>
  </node>
  <node id="25366" label="ENSMUSG00000032409" cy:nodeId="164">
    <graphics y="-489.3830612385374" x="574.2901675981502" z="0.0"/>
  </node>
  <node id="25365" label="ENSMUSG00000033411" cy:nodeId="165">
    <graphics y="-362.65936739088113" x="484.6143863481502" z="0.0"/>
  </node>
  <node id="25364" label="ENSMUSG00000034614" cy:nodeId="166">
    <graphics y="-562.3185775959593" x="486.48273351611897" z="0.0"/>
  </node>
  <node id="25363" label="ENSMUSG00000030737" cy:nodeId="167">
    <graphics y="-525.9396713459593" x="538.2829654497127" z="0.0"/>
  </node>
  <node id="25362" label="ENSMUSG00000030867" cy:nodeId="168">
    <graphics y="-632.941319295178" x="453.2684390825252" z="0.0"/>
  </node>
  <node id="25361" label="ENSMUSG00000025271" cy:nodeId="169">
    <graphics y="-607.9664047443968" x="508.99054601611897" z="0.0"/>
  </node>
  <node id="25360" label="ENSMUSG00000021569" cy:nodeId="170">
    <graphics y="-525.7573898518186" x="512.825262812994" z="0.0"/>
  </node>
  <node id="25359" label="ENSMUSG00000022358" cy:nodeId="171">
    <graphics y="-127.78918153883035" x="532.003241328619" z="0.0"/>
  </node>
  <node id="25358" label="ENSMUSG00000020941" cy:nodeId="172">
    <graphics y="-592.5742538654905" x="430.53339269580647" z="0.0"/>
  </node>
  <node id="25357" label="ENSMUSG00000014905" cy:nodeId="173">
    <graphics y="-416.2362106525999" x="489.02277257861897" z="0.0"/>
  </node>
  <node id="25356" label="ENSMUSG00000032204" cy:nodeId="174">
    <graphics y="282.44451444505637" x="895.873358516119" z="0.0"/>
  </node>
  <node id="25355" label="ENSMUSG00000003053" cy:nodeId="175">
    <graphics y="343.1046096599001" x="847.3543765825252" z="0.0"/>
  </node>
  <node id="25354" label="mmu-miR-350-5p" cy:nodeId="176">
    <graphics y="139.33901517747825" x="503.35858800830647" z="0.0"/>
  </node>
  <node id="25353" label="ENSMUSG00000044934" cy:nodeId="177">
    <graphics y="157.0585586345095" x="551.8458926958065" z="0.0"/>
  </node>
  <node id="25352" label="ENSMUSG00000027605" cy:nodeId="178">
    <graphics y="-2.8873985493283953" x="802.2514102739315" z="0.0"/>
  </node>
  <node id="25351" label="ENSMUSG00000020225" cy:nodeId="179">
    <graphics y="-21.85246164442117" x="673.475897578619" z="0.0"/>
  </node>
  <node id="25350" label="ENSMUSG00000006273" cy:nodeId="180">
    <graphics y="350.67666166185325" x="529.4838931840877" z="0.0"/>
  </node>
  <node id="25349" label="ENSMUSG00000031557" cy:nodeId="181">
    <graphics y="-190.97827608228738" x="534.2384708208065" z="0.0"/>
  </node>
  <node id="25348" label="ENSMUSG00000027808" cy:nodeId="182">
    <graphics y="-133.88693697095925" x="480.8397281450252" z="0.0"/>
  </node>
  <node id="25347" label="ENSMUSG00000002265" cy:nodeId="183">
    <graphics y="148.67687528490012" x="453.8966129106502" z="0.0"/>
  </node>
  <node id="25346" label="mmu-miR-540-3p" cy:nodeId="184">
    <graphics y="17.741488627185277" x="876.5414493364315" z="0.0"/>
  </node>
  <node id="25345" label="ENSMUSG00000054723" cy:nodeId="185">
    <graphics y="-388.05487520338113" x="620.7763736528377" z="0.0"/>
  </node>
  <node id="25344" label="ENSMUSG00000041741" cy:nodeId="186">
    <graphics y="-71.20127565504129" x="450.98407628955647" z="0.0"/>
  </node>
  <node id="25343" label="ENSMUSG00000037822" cy:nodeId="187">
    <graphics y="11.440480402697972" x="503.12042882861897" z="0.0"/>
  </node>
  <node id="25342" label="ENSMUSG00000031596" cy:nodeId="188">
    <graphics y="66.46917264818137" x="514.841620234869" z="0.0"/>
  </node>
  <node id="25341" label="ENSMUSG00000034111" cy:nodeId="189">
    <graphics y="51.619464091052464" x="539.3408267778377" z="0.0"/>
  </node>
  <node id="25340" label="ENSMUSG00000027822" cy:nodeId="190">
    <graphics y="-309.62765962720925" x="670.6381900590877" z="0.0"/>
  </node>
  <node id="25339" label="ENSMUSG00000021952" cy:nodeId="191">
    <graphics y="-203.96837312818582" x="423.9957340044002" z="0.0"/>
  </node>
  <node id="25338" label="ENSMUSG00000022043" cy:nodeId="192">
    <graphics y="-232.06712801099832" x="391.89826085986897" z="0.0"/>
  </node>
  <node id="25337" label="ENSMUSG00000018548" cy:nodeId="193">
    <graphics y="-371.71286470533425" x="640.8344791215877" z="0.0"/>
  </node>
  <node id="25336" label="mmu-miR-434-3p" cy:nodeId="194">
    <graphics y="212.35705106615012" x="-598.0923397260685" z="0.0"/>
  </node>
  <node id="25335" label="mmu-miR-411-5p" cy:nodeId="195">
    <graphics y="733.519862345447" x="369.80560949268147" z="0.0"/>
  </node>
  <node id="25334" label="mmu-miR-574-3p" cy:nodeId="196">
    <graphics y="-137.451329060803" x="611.0551822465877" z="0.0"/>
  </node>
  <node id="25333" label="mmu-miR-127-3p" cy:nodeId="197">
    <graphics y="-638.6077270507812" x="695.3745394146009" z="0.0"/>
  </node>
  <node id="25332" label="ENSMUSG00000097131" cy:nodeId="198">
    <graphics y="-530.8855590820312" x="692.3570833599134" z="0.0"/>
  </node>
  <node id="25331" label="mmu-miR-152-3p" cy:nodeId="199">
    <graphics y="-53.93652040601785" x="180.80676916065022" z="0.0"/>
  </node>
  <node id="25330" label="mmu-miR-218-5p" cy:nodeId="200">
    <graphics y="-1.4547222340207782" x="80.3539798540096" z="0.0"/>
  </node>
  <node id="25329" label="ENSMUSG00000097101" cy:nodeId="201">
    <graphics y="-347.12448579908425" x="723.3742130083065" z="0.0"/>
  </node>
  <node id="25328" label="ENSMUSG00000049881" cy:nodeId="202">
    <graphics y="334.98980253099387" x="637.7538516801815" z="0.0"/>
  </node>
  <node id="25327" label="mmu-miR-101a-3p" cy:nodeId="203">
    <graphics y="83.78786008714621" x="204.12647130908772" z="0.0"/>
  </node>
  <node id="25326" label="mmu-let-7e-5p" cy:nodeId="204">
    <graphics y="-166.54504854322488" x="190.8494632524471" z="0.0"/>
  </node>
  <node id="25325" label="mmu-miR-195a-5p" cy:nodeId="205">
    <graphics y="-291.08197021484375" x="813.9140625" z="0.0"/>
  </node>
  <node id="25324" label="mmu-miR-130a-3p" cy:nodeId="206">
    <graphics y="18.142314127673558" x="330.1460025590877" z="0.0"/>
  </node>
  <node id="25323" label="mmu-miR-210-3p" cy:nodeId="207">
    <graphics y="-91.54953462720925" x="145.44730260791584" z="0.0"/>
  </node>
  <node id="25322" label="mmu-miR-677-5p" cy:nodeId="208">
    <graphics y="-86.01424104810769" x="148.58789709033772" z="0.0"/>
  </node>
  <node id="25321" label="ENSMUSG00000070392" cy:nodeId="209">
    <graphics y="-211.975498982678" x="497.63593175830647" z="0.0"/>
  </node>
  <node id="25320" label="mmu-miR-7a-5p" cy:nodeId="210">
    <graphics y="-79.47428209425027" x="176.69940832080647" z="0.0"/>
  </node>
  <node id="25319" label="ENSMUSG00000072694" cy:nodeId="211">
    <graphics y="-271.371250935803" x="310.09442785205647" z="0.0"/>
  </node>
  <node id="25318" label="mmu-miR-497a-5p" cy:nodeId="212">
    <graphics y="-221.96294099927957" x="867.9196231645565" z="0.0"/>
  </node>
  <node id="25317" label="ENSMUSG00000106847" cy:nodeId="213">
    <graphics y="-139.59216005445535" x="652.1661441606502" z="0.0"/>
  </node>
  <node id="25316" label="ENSMUSG00000064043" cy:nodeId="214">
    <graphics y="-152.63466341138894" x="416.7169254106502" z="0.0"/>
  </node>
  <node id="25315" label="ENSMUSG00000099519" cy:nodeId="215">
    <graphics y="-98.8450287067991" x="574.6459415239315" z="0.0"/>
  </node>
  <node id="25314" label="ENSMUSG00000096944" cy:nodeId="216">
    <graphics y="-315.17392427564675" x="447.99323156299397" z="0.0"/>
  </node>
  <node id="25313" label="mmu-miR-222-3p" cy:nodeId="217">
    <graphics y="-89.41389925123269" x="186.3176029008846" z="0.0"/>
  </node>
  <node id="25312" label="ENSMUSG00000096954" cy:nodeId="218">
    <graphics y="-66.99573976636941" x="601.4914615434627" z="0.0"/>
  </node>
  <node id="25311" label="ENSMUSG00000086503" cy:nodeId="219">
    <graphics y="-170.83142549634988" x="312.98734167041584" z="0.0"/>
  </node>
  <node id="25310" label="ENSMUSG00000075511" cy:nodeId="220">
    <graphics y="-164.56316574326445" x="935.9091463481948" z="0.0"/>
  </node>
  <node id="25309" label="mmu-miR-1945" cy:nodeId="221">
    <graphics y="-42.26411897779519" x="19.90515783252522" z="0.0"/>
  </node>
  <node id="25308" label="mmu-miR-101c" cy:nodeId="222">
    <graphics y="-112.88190157056863" x="343.1514957231502" z="0.0"/>
  </node>
  <node id="25307" label="ENSMUSG00000086847" cy:nodeId="223">
    <graphics y="-56.64104158521707" x="14.038550166509594" z="0.0"/>
  </node>
  <node id="25306" label="ENSMUSG00000106634" cy:nodeId="224">
    <graphics y="350.90166776536887" x="-524.5261165815373" z="0.0"/>
  </node>
  <node id="25305" label="ENSMUSG00000097515" cy:nodeId="225">
    <graphics y="84.59407346605246" x="-199.16587564525798" z="0.0"/>
  </node>
  <node id="25304" label="ENSMUSG00000085329" cy:nodeId="226">
    <graphics y="-102.73568422437722" x="132.25421789111897" z="0.0"/>
  </node>
  <node id="25303" label="ENSMUSG00000086141" cy:nodeId="227">
    <graphics y="249.02041166185325" x="396.02338293018147" z="0.0"/>
  </node>
  <node id="25302" label="ENSMUSG00000087196" cy:nodeId="228">
    <graphics y="170.99450223802512" x="-364.7103512006779" z="0.0"/>
  </node>
  <node id="25301" label="ENSMUSG00000097632" cy:nodeId="229">
    <graphics y="-89.29506380201394" x="-163.46756288585857" z="0.0"/>
  </node>
  <node id="25300" label="ENSMUSG00000075010" cy:nodeId="230">
    <graphics y="-296.55182344556863" x="225.5547855180721" z="0.0"/>
  </node>
  <node id="25299" label="ENSMUSG00000099364" cy:nodeId="231">
    <graphics y="-119.06496126295144" x="345.7558353227596" z="0.0"/>
  </node>
  <node id="25298" label="ENSMUSG00000102123" cy:nodeId="232">
    <graphics y="-450.75348360181863" x="25.775992183111157" z="0.0"/>
  </node>
  <node id="25297" label="ENSMUSG00000085152" cy:nodeId="233">
    <graphics y="364.77639310716575" x="-2.823373051263843" z="0.0"/>
  </node>
  <node id="25296" label="ENSMUSG00000111857" cy:nodeId="234">
    <graphics y="450.75347440599387" x="-327.88318750438884" z="0.0"/>
  </node>
  <node id="25295" label="ENSMUSG00000111528" cy:nodeId="235">
    <graphics y="496.188319376697" x="19.10431554736897" z="0.0"/>
  </node>
  <node id="25294" label="ENSMUSG00000099025" cy:nodeId="236">
    <graphics y="8.510356119861058" x="339.27155187549397" z="0.0"/>
  </node>
  <node id="25293" label="ENSMUSG00000110866" cy:nodeId="237">
    <graphics y="250.08950345872825" x="-130.49535295543865" z="0.0"/>
  </node>
  <node id="25292" label="ENSMUSG00000069713" cy:nodeId="238">
    <graphics y="-37.5128753864866" x="-655.2300960737248" z="0.0"/>
  </node>
  <node id="25291" label="ENSMUSG00000097415" cy:nodeId="239">
    <graphics y="-203.82312471509988" x="34.87811925830647" z="0.0"/>
  </node>
  <node id="25290" label="ENSMUSG00000107728" cy:nodeId="240">
    <graphics y="-534.8552597248655" x="-339.92501184520916" z="0.0"/>
  </node>
  <node id="25289" label="ENSMUSG00000107879" cy:nodeId="241">
    <graphics y="-570.3113144123655" x="199.26309850635334" z="0.0"/>
  </node>
  <node id="25288" label="ENSMUSG00000110276" cy:nodeId="242">
    <graphics y="222.25764005540793" x="32.640723018072094" z="0.0"/>
  </node>
  <node id="25287" label="ENSMUSG00000097284" cy:nodeId="243">
    <graphics y="91.58497159837668" x="-179.57522317943767" z="0.0"/>
  </node>
  <node id="25286" label="ENSMUSG00000099552" cy:nodeId="244">
    <graphics y="288.7773391520876" x="-100.41995355663494" z="0.0"/>
  </node>
  <node id="25285" label="ENSMUSG00000097932" cy:nodeId="245">
    <graphics y="-212.66920930982644" x="-206.65170023021892" z="0.0"/>
  </node>
  <node id="25284" label="ENSMUSG00000097059" cy:nodeId="246">
    <graphics y="-357.20993501783425" x="242.9203861040096" z="0.0"/>
  </node>
  <node id="25283" label="ENSMUSG00000100022" cy:nodeId="247">
    <graphics y="284.48830716966575" x="-123.34446069774822" z="0.0"/>
  </node>
  <node id="25282" label="ENSMUSG00000097709" cy:nodeId="248">
    <graphics y="-153.373204060803" x="-257.2484066205998" z="0.0"/>
  </node>
  <node id="25281" label="ENSMUSG00000029878" cy:nodeId="249">
    <graphics y="-124.11801607252175" x="-397.2497799116154" z="0.0"/>
  </node>
  <node id="25280" label="ENSMUSG00000111043" cy:nodeId="250">
    <graphics y="130.877772501697" x="-236.31693384227947" z="0.0"/>
  </node>
  <node id="25279" label="ENSMUSG00000109936" cy:nodeId="251">
    <graphics y="-313.331211873303" x="-593.3139278608342" z="0.0"/>
  </node>
  <node id="25278" label="ENSMUSG00000103067" cy:nodeId="252">
    <graphics y="151.91547696947043" x="378.04096105518147" z="0.0"/>
  </node>
  <node id="25277" label="ENSMUSG00000097561" cy:nodeId="253">
    <graphics y="-52.70770723463113" x="-243.9712612348576" z="0.0"/>
  </node>
  <node id="25276" label="ENSMUSG00000106658" cy:nodeId="254">
    <graphics y="76.84126584886496" x="-137.66428873119548" z="0.0"/>
  </node>
  <node id="25275" label="ENSMUSG00000103043" cy:nodeId="255">
    <graphics y="-81.1142051899534" x="-292.9036342817326" z="0.0"/>
  </node>
  <node id="25274" label="ENSMUSG00000085183" cy:nodeId="256">
    <graphics y="69.20383756517356" x="-76.59229394970134" z="0.0"/>
  </node>
  <node id="25273" label="ENSMUSG00000066176" cy:nodeId="257">
    <graphics y="-187.8867996418577" x="-305.0482876020451" z="0.0"/>
  </node>
  <node id="25272" label="ENSMUSG00000105146" cy:nodeId="258">
    <graphics y="-159.7600448811155" x="-4.322594853021656" z="0.0"/>
  </node>
  <node id="25271" label="ENSMUSG00000103965" cy:nodeId="259">
    <graphics y="312.20583646654075" x="-27.639596195795093" z="0.0"/>
  </node>
  <node id="25270" label="ENSMUSG00000084797" cy:nodeId="260">
    <graphics y="0.8158942973512922" x="236.6918704790096" z="0.0"/>
  </node>
  <node id="25269" label="ENSMUSG00000051331" cy:nodeId="261">
    <graphics y="59.28647916673606" x="592.4605777544002" z="0.0"/>
  </node>
  <node id="25268" label="ENSMUSG00000040146" cy:nodeId="262">
    <graphics y="207.60399930833762" x="-668.1468441205998" z="0.0"/>
  </node>
  <node id="25267" label="ENSMUSG00000038765" cy:nodeId="263">
    <graphics y="464.75722806810325" x="-520.3534786420842" z="0.0"/>
  </node>
  <node id="25266" label="ENSMUSG00000052942" cy:nodeId="264">
    <graphics y="296.844081095447" x="762.6588199419002" z="0.0"/>
  </node>
  <node id="25265" label="ENSMUSG00000046179" cy:nodeId="265">
    <graphics y="-120.36758119703347" x="-267.68765375194744" z="0.0"/>
  </node>
  <node id="25264" label="ENSMUSG00000044312" cy:nodeId="266">
    <graphics y="137.89704435228293" x="338.90238073291584" z="0.0"/>
  </node>
  <node id="25263" label="ENSMUSG00000051235" cy:nodeId="267">
    <graphics y="-487.9221237385374" x="-414.3361751752873" z="0.0"/>
  </node>
  <node id="25262" label="ENSMUSG00000081058" cy:nodeId="268">
    <graphics y="-421.8511093342405" x="374.77399328174397" z="0.0"/>
  </node>
  <node id="25261" label="ENSMUSG00000056296" cy:nodeId="269">
    <graphics y="578.0702773845095" x="-231.3269970136662" z="0.0"/>
  </node>
  <node id="25260" label="ENSMUSG00000075588" cy:nodeId="270">
    <graphics y="719.8390151774782" x="-47.12572595653728" z="0.0"/>
  </node>
  <node id="25259" label="ENSMUSG00000062867" cy:nodeId="271">
    <graphics y="-484.89719087720925" x="339.6702945512752" z="0.0"/>
  </node>
  <node id="25258" label="ENSMUSG00000028587" cy:nodeId="272">
    <graphics y="349.84527128099387" x="348.7670657915096" z="0.0"/>
  </node>
  <node id="25257" label="ENSMUSG00000023505" cy:nodeId="273">
    <graphics y="526.5168105876345" x="-349.2979671674748" z="0.0"/>
  </node>
  <node id="25256" label="ENSMUSG00000037279" cy:nodeId="274">
    <graphics y="-88.48589021802957" x="-52.104539127924" z="0.0"/>
  </node>
  <node id="25255" label="ENSMUSG00000094840" cy:nodeId="275">
    <graphics y="-102.51195985914285" x="-679.487969608881" z="0.0"/>
  </node>
  <node id="25254" label="ENSMUSG00000074444" cy:nodeId="276">
    <graphics y="533.962001017322" x="327.11478307666584" z="0.0"/>
  </node>
  <node id="25253" label="ENSMUSG00000056004" cy:nodeId="277">
    <graphics y="150.89068143724387" x="-663.2100460248967" z="0.0"/>
  </node>
  <node id="25252" label="ENSMUSG00000027220" cy:nodeId="278">
    <graphics y="-166.56447298170144" x="435.1666324419002" z="0.0"/>
  </node>
  <node id="25251" label="ENSMUSG00000020774" cy:nodeId="279">
    <graphics y="586.9510757243532" x="-151.1393315511723" z="0.0"/>
  </node>
  <node id="25250" label="ENSMUSG00000038742" cy:nodeId="280">
    <graphics y="-266.2841690266233" x="-532.0140011030217" z="0.0"/>
  </node>
  <node id="25249" label="ENSMUSG00000019917" cy:nodeId="281">
    <graphics y="-224.15187532545144" x="595.921942500494" z="0.0"/>
  </node>
  <node id="25248" label="ENSMUSG00000021965" cy:nodeId="282">
    <graphics y="622.0672866618532" x="112.9378421586971" z="0.0"/>
  </node>
  <node id="25247" label="ENSMUSG00000020592" cy:nodeId="283">
    <graphics y="-117.0950287067991" x="721.734198359869" z="0.0"/>
  </node>
  <node id="25246" label="ENSMUSG00000044453" cy:nodeId="284">
    <graphics y="335.8845168864626" x="466.86163976611897" z="0.0"/>
  </node>
  <node id="25245" label="ENSMUSG00000071648" cy:nodeId="285">
    <graphics y="-636.8221176350218" x="32.15196874561116" z="0.0"/>
  </node>
  <node id="25244" label="ENSMUSG00000054453" cy:nodeId="286">
    <graphics y="615.820887736072" x="-202.54407617626384" z="0.0"/>
  </node>
  <node id="25243" label="ENSMUSG00000051735" cy:nodeId="287">
    <graphics y="255.03509061693137" x="-619.9263851362248" z="0.0"/>
  </node>
  <node id="25242" label="ENSMUSG00000047228" cy:nodeId="288">
    <graphics y="646.851893595447" x="-23.320519657709156" z="0.0"/>
  </node>
  <node id="25241" label="ENSMUSG00000044860" cy:nodeId="289">
    <graphics y="614.2839004313845" x="78.19754674854084" z="0.0"/>
  </node>
  <node id="25240" label="ENSMUSG00000044702" cy:nodeId="290">
    <graphics y="574.6901504313845" x="-272.748093815424" z="0.0"/>
  </node>
  <node id="25239" label="ENSMUSG00000042743" cy:nodeId="291">
    <graphics y="-648.9465072834593" x="-7.283349247552906" z="0.0"/>
  </node>
  <node id="25238" label="ENSMUSG00000036768" cy:nodeId="292">
    <graphics y="420.07229154466575" x="-508.2285091596623" z="0.0"/>
  </node>
  <node id="25237" label="ENSMUSG00000031465" cy:nodeId="293">
    <graphics y="643.9012710368532" x="-69.90523645458416" z="0.0"/>
  </node>
  <node id="25236" label="ENSMUSG00000037979" cy:nodeId="294">
    <graphics y="-367.681065388928" x="337.5982425493221" z="0.0"/>
  </node>
  <node id="25235" label="ENSMUSG00000027223" cy:nodeId="295">
    <graphics y="260.84783475755637" x="-281.55111047802166" z="0.0"/>
  </node>
  <node id="25234" label="ENSMUSG00000019429" cy:nodeId="296">
    <graphics y="615.9723159587282" x="179.74756505908772" z="0.0"/>
  </node>
  <node id="25233" label="ENSMUSG00000031770" cy:nodeId="297">
    <graphics y="-530.8683471679688" x="795.3744783794447" z="0.0"/>
  </node>
  <node id="25232" label="ENSMUSG00000028466" cy:nodeId="298">
    <graphics y="-638.6077270507812" x="797.6960115825697" z="0.0"/>
  </node>
  <node id="25231" label="ENSMUSG00000050556" cy:nodeId="299">
    <graphics y="525.323085001697" x="235.67957189502522" z="0.0"/>
  </node>
  <node id="25230" label="ENSMUSG00000038126" cy:nodeId="300">
    <graphics y="496.1064101970095" x="-492.1500179487248" z="0.0"/>
  </node>
  <node id="25229" label="ENSMUSG00000027353" cy:nodeId="301">
    <graphics y="-146.42484743238504" x="-699.0642635541935" z="0.0"/>
  </node>
  <node id="25228" label="ENSMUSG00000025574" cy:nodeId="302">
    <graphics y="565.1351577556032" x="290.56635168018147" z="0.0"/>
  </node>
  <node id="25227" label="ENSMUSG00000034701" cy:nodeId="303">
    <graphics y="3.84949605821555" x="-28.000954838373218" z="0.0"/>
  </node>
  <node id="25226" label="ENSMUSG00000027434" cy:nodeId="304">
    <graphics y="-26.077280827770778" x="-25.193062992670093" z="0.0"/>
  </node>
  <node id="25225" label="ENSMUSG00000039239" cy:nodeId="305">
    <graphics y="-382.75619966627175" x="147.20621374072834" z="0.0"/>
  </node>
  <node id="25224" label="ENSMUSG00000031073" cy:nodeId="306">
    <graphics y="-418.0408981525999" x="103.18439367236897" z="0.0"/>
  </node>
  <node id="25223" label="ENSMUSG00000044024" cy:nodeId="307">
    <graphics y="523.2181655681032" x="90.89061620654866" z="0.0"/>
  </node>
  <node id="25222" label="ENSMUSG00000028496" cy:nodeId="308">
    <graphics y="64.96089475511496" x="389.2943179887752" z="0.0"/>
  </node>
  <node id="25221" label="ENSMUSG00000019737" cy:nodeId="309">
    <graphics y="-389.0205124104124" x="-289.19915124950603" z="0.0"/>
  </node>
  <node id="25220" label="ENSMUSG00000013338" cy:nodeId="310">
    <graphics y="284.5611526286501" x="-326.6789333539982" z="0.0"/>
  </node>
  <node id="25219" label="ENSMUSG00000061533" cy:nodeId="311">
    <graphics y="-364.500157185803" x="-150.4553224760075" z="0.0"/>
  </node>
  <node id="25218" label="ENSMUSG00000032323" cy:nodeId="312">
    <graphics y="-241.13097078443582" x="-550.2827388959904" z="0.0"/>
  </node>
  <node id="25217" label="ENSMUSG00000036564" cy:nodeId="313">
    <graphics y="-305.47580415845925" x="283.94827917041584" z="0.0"/>
  </node>
  <node id="25216" label="ENSMUSG00000024986" cy:nodeId="314">
    <graphics y="-392.5827682697874" x="-362.58292505321697" z="0.0"/>
  </node>
  <node id="25215" label="ENSMUSG00000028108" cy:nodeId="315">
    <graphics y="-323.29977876783425" x="483.10065343799397" z="0.0"/>
  </node>
  <node id="25214" label="ENSMUSG00000098132" cy:nodeId="316">
    <graphics y="-64.26206285596902" x="224.9046390336971" z="0.0"/>
  </node>
  <node id="25213" label="ENSMUSG00000075296" cy:nodeId="317">
    <graphics y="29.97008817552512" x="-633.2094967084904" z="0.0"/>
  </node>
  <node id="25212" label="ENSMUSG00000073764" cy:nodeId="318">
    <graphics y="497.89113920091575" x="-3.0717403608341556" z="0.0"/>
  </node>
  <node id="25211" label="ENSMUSG00000073399" cy:nodeId="319">
    <graphics y="391.0722610270876" x="-190.65685388622478" z="0.0"/>
  </node>
  <node id="25210" label="ENSMUSG00000071723" cy:nodeId="320">
    <graphics y="-523.6112716877561" x="-247.56946680126384" z="0.0"/>
  </node>
  <node id="25209" label="ENSMUSG00000071113" cy:nodeId="321">
    <graphics y="-461.52035982252175" x="-364.48235437450603" z="0.0"/>
  </node>
  <node id="25208" label="ENSMUSG00000068246" cy:nodeId="322">
    <graphics y="-393.84897310377175" x="286.61444738330647" z="0.0"/>
  </node>
  <node id="25207" label="ENSMUSG00000066366" cy:nodeId="323">
    <graphics y="-221.9950760090452" x="-477.6168453413029" z="0.0"/>
  </node>
  <node id="25206" label="ENSMUSG00000064213" cy:nodeId="324">
    <graphics y="403.02263944505637" x="494.8465640825252" z="0.0"/>
  </node>
  <node id="25205" label="ENSMUSG00000062510" cy:nodeId="325">
    <graphics y="-371.1923874104124" x="-7.747201176263843" z="0.0"/>
  </node>
  <node id="25204" label="ENSMUSG00000061758" cy:nodeId="326">
    <graphics y="343.16631620286887" x="-152.09674570141033" z="0.0"/>
  </node>
  <node id="25203" label="ENSMUSG00000058260" cy:nodeId="327">
    <graphics y="-444.704991170178" x="-280.47576257763103" z="0.0"/>
  </node>
  <node id="25202" label="ENSMUSG00000056492" cy:nodeId="328">
    <graphics y="-502.494786092053" x="104.40314367236897" z="0.0"/>
  </node>
  <node id="25201" label="ENSMUSG00000050394" cy:nodeId="329">
    <graphics y="485.3149368083376" x="-412.68888208446697" z="0.0"/>
  </node>
  <node id="25200" label="ENSMUSG00000050379" cy:nodeId="330">
    <graphics y="-155.60657198072488" x="113.58243444385334" z="0.0"/>
  </node>
  <node id="25199" label="ENSMUSG00000050192" cy:nodeId="331">
    <graphics y="205.37742154954856" x="279.50702550830647" z="0.0"/>
  </node>
  <node id="25198" label="ENSMUSG00000049871" cy:nodeId="332">
    <graphics y="-437.89572603345925" x="72.70479467334553" z="0.0"/>
  </node>
  <node id="25197" label="ENSMUSG00000049047" cy:nodeId="333">
    <graphics y="511.70107572435325" x="-124.9501430707951" z="0.0"/>
  </node>
  <node id="25196" label="ENSMUSG00000048763" cy:nodeId="334">
    <graphics y="-376.2200058186155" x="85.80985143604084" z="0.0"/>
  </node>
  <node id="25195" label="ENSMUSG00000047242" cy:nodeId="335">
    <graphics y="30.518466166247777" x="-358.78943750438884" z="0.0"/>
  </node>
  <node id="25194" label="ENSMUSG00000046634" cy:nodeId="336">
    <graphics y="-17.575190373669216" x="-64.10027429638103" z="0.0"/>
  </node>
  <node id="25193" label="ENSMUSG00000044921" cy:nodeId="337">
    <graphics y="52.35435026048606" x="-416.37203332958416" z="0.0"/>
  </node>
  <node id="25192" label="ENSMUSG00000043518" cy:nodeId="338">
    <graphics y="122.869960001697" x="-436.6654293256779" z="0.0"/>
  </node>
  <node id="25191" label="ENSMUSG00000042312" cy:nodeId="339">
    <graphics y="-430.8723190510374" x="319.55499914111897" z="0.0"/>
  </node>
  <node id="25190" label="ENSMUSG00000040274" cy:nodeId="340">
    <graphics y="88.56196134447043" x="420.03229406299397" z="0.0"/>
  </node>
  <node id="25189" label="ENSMUSG00000039231" cy:nodeId="341">
    <graphics y="85.47819822191184" x="416.69867589893147" z="0.0"/>
  </node>
  <node id="25188" label="ENSMUSG00000037216" cy:nodeId="342">
    <graphics y="-600.1542709553343" x="-290.9234401899357" z="0.0"/>
  </node>
  <node id="25187" label="ENSMUSG00000036264" cy:nodeId="343">
    <graphics y="-221.42247469068582" x="-472.96514246044353" z="0.0"/>
  </node>
  <node id="25186" label="ENSMUSG00000036109" cy:nodeId="344">
    <graphics y="645.718104532947" x="16.949621943853344" z="0.0"/>
  </node>
  <node id="25185" label="ENSMUSG00000035697" cy:nodeId="345">
    <graphics y="-530.4303024494749" x="-18.99730798778728" z="0.0"/>
  </node>
  <node id="25184" label="ENSMUSG00000035246" cy:nodeId="346">
    <graphics y="4.71596448778098" x="-449.7359554487248" z="0.0"/>
  </node>
  <node id="25183" label="ENSMUSG00000034923" cy:nodeId="347">
    <graphics y="-599.043614217053" x="-346.50904199657634" z="0.0"/>
  </node>
  <node id="25182" label="ENSMUSG00000032860" cy:nodeId="348">
    <graphics y="179.89329069017356" x="-277.9149334150334" z="0.0"/>
  </node>
  <node id="25181" label="ENSMUSG00000032064" cy:nodeId="349">
    <graphics y="-384.7363327229124" x="-489.0184566694279" z="0.0"/>
  </node>
  <node id="25180" label="ENSMUSG00000031570" cy:nodeId="350">
    <graphics y="-364.25009615064675" x="101.72342565479084" z="0.0"/>
  </node>
  <node id="25179" label="ENSMUSG00000031377" cy:nodeId="351">
    <graphics y="359.4383498942751" x="-230.43920251903728" z="0.0"/>
  </node>
  <node id="25178" label="ENSMUSG00000031255" cy:nodeId="352">
    <graphics y="-561.993321248303" x="-59.128373356439624" z="0.0"/>
  </node>
  <node id="25177" label="ENSMUSG00000031099" cy:nodeId="353">
    <graphics y="359.96804349779075" x="-368.1284115034123" z="0.0"/>
  </node>
  <node id="25176" label="ENSMUSG00000030782" cy:nodeId="354">
    <graphics y="169.21735685228293" x="-17.313012333490406" z="0.0"/>
  </node>
  <node id="25175" label="ENSMUSG00000030641" cy:nodeId="355">
    <graphics y="-343.4903610432249" x="-374.92582056102947" z="0.0"/>
  </node>
  <node id="25174" label="ENSMUSG00000029363" cy:nodeId="356">
    <graphics y="-598.1794784748655" x="-226.91873285350994" z="0.0"/>
  </node>
  <node id="25173" label="ENSMUSG00000028332" cy:nodeId="357">
    <graphics y="-476.1902206623655" x="-141.1421768384953" z="0.0"/>
  </node>
  <node id="25172" label="ENSMUSG00000027496" cy:nodeId="358">
    <graphics y="-107.95939333082254" x="475.36786535205647" z="0.0"/>
  </node>
  <node id="25171" label="ENSMUSG00000027331" cy:nodeId="359">
    <graphics y="-509.64349825025613" x="98.98712804736897" z="0.0"/>
  </node>
  <node id="25170" label="ENSMUSG00000027298" cy:nodeId="360">
    <graphics y="-471.1445663654905" x="280.98209264697834" z="0.0"/>
  </node>
  <node id="25169" label="ENSMUSG00000024771" cy:nodeId="361">
    <graphics y="270.58916776536887" x="279.5908267778377" z="0.0"/>
  </node>
  <node id="25168" label="ENSMUSG00000024660" cy:nodeId="362">
    <graphics y="343.338221720447" x="385.32807043018147" z="0.0"/>
  </node>
  <node id="25167" label="ENSMUSG00000024330" cy:nodeId="363">
    <graphics y="-578.121006795178" x="6.416510371587719" z="0.0"/>
  </node>
  <node id="25166" label="ENSMUSG00000024313" cy:nodeId="364">
    <graphics y="-425.427647420178" x="-537.5165645795842" z="0.0"/>
  </node>
  <node id="25165" label="ENSMUSG00000023192" cy:nodeId="365">
    <graphics y="297.3048965251345" x="301.38651159229084" z="0.0"/>
  </node>
  <node id="25164" label="ENSMUSG00000022661" cy:nodeId="366">
    <graphics y="645.082606486072" x="-175.76141473827556" z="0.0"/>
  </node>
  <node id="25163" label="ENSMUSG00000022199" cy:nodeId="367">
    <graphics y="-256.3196151936155" x="-623.5080501752873" z="0.0"/>
  </node>
  <node id="25162" label="ENSMUSG00000021070" cy:nodeId="368">
    <graphics y="-445.82745821119363" x="-229.0532924848576" z="0.0"/>
  </node>
  <node id="25161" label="ENSMUSG00000020627" cy:nodeId="369">
    <graphics y="-153.65100557447488" x="585.3952091020565" z="0.0"/>
  </node>
  <node id="25160" label="ENSMUSG00000020534" cy:nodeId="370">
    <graphics y="-279.6554001057249" x="376.92255285205647" z="0.0"/>
  </node>
  <node id="25159" label="ENSMUSG00000020032" cy:nodeId="371">
    <graphics y="-8.468822308788845" x="424.2873599809627" z="0.0"/>
  </node>
  <node id="25158" label="ENSMUSG00000019987" cy:nodeId="372">
    <graphics y="-411.90341646314675" x="224.03458288135334" z="0.0"/>
  </node>
  <node id="25157" label="ENSMUSG00000019888" cy:nodeId="373">
    <graphics y="59.40085142015403" x="-511.4915706830998" z="0.0"/>
  </node>
  <node id="25156" label="ENSMUSG00000018924" cy:nodeId="374">
    <graphics y="148.75747220872825" x="314.0957095903377" z="0.0"/>
  </node>
  <node id="25155" label="ENSMUSG00000017311" cy:nodeId="375">
    <graphics y="-274.44748384595925" x="504.7325504106502" z="0.0"/>
  </node>
  <node id="25154" label="ENSMUSG00000004540" cy:nodeId="376">
    <graphics y="-522.9345138752561" x="38.339392451665844" z="0.0"/>
  </node>
  <node id="25153" label="ENSMUSG00000003824" cy:nodeId="377">
    <graphics y="-163.72089082838113" x="336.67975500049397" z="0.0"/>
  </node>
  <node id="25152" label="ENSMUSG00000002297" cy:nodeId="378">
    <graphics y="-48.16000444532449" x="-632.4866268354435" z="0.0"/>
  </node>
  <node id="25151" label="ENSMUSG00000001366" cy:nodeId="379">
    <graphics y="-79.2179535114866" x="-427.2212154584904" z="0.0"/>
  </node>
  <node id="25150" label="ENSMUSG00000000037" cy:nodeId="380">
    <graphics y="341.3637649333376" x="-513.5325557905217" z="0.0"/>
  </node>
  <node id="25149" label="ENSMUSG00000042834" cy:nodeId="381">
    <graphics y="48.56163328050559" x="470.01593664111897" z="0.0"/>
  </node>
  <node id="25148" label="ENSMUSG00000110573" cy:nodeId="382">
    <graphics y="-264.6718795979124" x="-569.7899105268498" z="0.0"/>
  </node>
  <node id="25147" label="ENSMUSG00000096001" cy:nodeId="383">
    <graphics y="130.21557157396262" x="-481.96196863231853" z="0.0"/>
  </node>
  <node id="25146" label="ENSMUSG00000095448" cy:nodeId="384">
    <graphics y="-306.706700154553" x="-183.04197618541912" z="0.0"/>
  </node>
  <node id="25145" label="ENSMUSG00000085007" cy:nodeId="385">
    <graphics y="32.09499280809348" x="-560.4324581342717" z="0.0"/>
  </node>
  <node id="25144" label="ENSMUSG00000079180" cy:nodeId="386">
    <graphics y="-475.12762910963113" x="-260.735642643549" z="0.0"/>
  </node>
  <node id="25143" label="ENSMUSG00000078963" cy:nodeId="387">
    <graphics y="-218.27631075025613" x="-449.5100338178654" z="0.0"/>
  </node>
  <node id="25142" label="ENSMUSG00000075701" cy:nodeId="388">
    <graphics y="236.94411771654075" x="-210.48325464306072" z="0.0"/>
  </node>
  <node id="25141" label="ENSMUSG00000072244" cy:nodeId="389">
    <graphics y="-136.72440797926004" x="-317.10079309520916" z="0.0"/>
  </node>
  <node id="25140" label="ENSMUSG00000068617" cy:nodeId="390">
    <graphics y="-31.010559865246364" x="-222.94336816845134" z="0.0"/>
  </node>
  <node id="25139" label="ENSMUSG00000067724" cy:nodeId="391">
    <graphics y="-412.4039352619749" x="-148.0014888959904" z="0.0"/>
  </node>
  <node id="25138" label="ENSMUSG00000067229" cy:nodeId="392">
    <graphics y="349.38335721849387" x="-509.24260828075603" z="0.0"/>
  </node>
  <node id="25137" label="ENSMUSG00000066090" cy:nodeId="393">
    <graphics y="336.84636991380637" x="-348.35645410595134" z="0.0"/>
  </node>
  <node id="25136" label="ENSMUSG00000064246" cy:nodeId="394">
    <graphics y="44.88019864915793" x="249.6166751665096" z="0.0"/>
  </node>
  <node id="25135" label="ENSMUSG00000062591" cy:nodeId="395">
    <graphics y="337.4179641520876" x="-24.077920170404468" z="0.0"/>
  </node>
  <node id="25134" label="ENSMUSG00000061762" cy:nodeId="396">
    <graphics y="-291.05917818189675" x="-263.7856609540959" z="0.0"/>
  </node>
  <node id="25133" label="ENSMUSG00000059708" cy:nodeId="397">
    <graphics y="188.71619718431418" x="87.15038183154866" z="0.0"/>
  </node>
  <node id="25132" label="ENSMUSG00000057346" cy:nodeId="398">
    <graphics y="427.08095853685325" x="169.79324987354084" z="0.0"/>
  </node>
  <node id="25131" label="ENSMUSG00000055963" cy:nodeId="399">
    <graphics y="-325.47556001783425" x="-518.4297115522404" z="0.0"/>
  </node>
  <node id="25130" label="ENSMUSG00000054423" cy:nodeId="400">
    <graphics y="-81.51623994947488" x="331.9185855669002" z="0.0"/>
  </node>
  <node id="25129" label="ENSMUSG00000054169" cy:nodeId="401">
    <graphics y="-331.17209322095925" x="-5.014657230951343" z="0.0"/>
  </node>
  <node id="25128" label="ENSMUSG00000053783" cy:nodeId="402">
    <graphics y="-99.16905672193582" x="-111.59643289623455" z="0.0"/>
  </node>
  <node id="25127" label="ENSMUSG00000052520" cy:nodeId="403">
    <graphics y="-433.99298555494363" x="156.85675695361897" z="0.0"/>
  </node>
  <node id="25126" label="ENSMUSG00000051579" cy:nodeId="404">
    <graphics y="-270.85080415845925" x="32.593054561040844" z="0.0"/>
  </node>
  <node id="25125" label="ENSMUSG00000050822" cy:nodeId="405">
    <graphics y="82.65854947923606" x="-294.9836361127873" z="0.0"/>
  </node>
  <node id="25124" label="ENSMUSG00000050821" cy:nodeId="406">
    <graphics y="-53.3619850361448" x="-494.7696773725529" z="0.0"/>
  </node>
  <node id="25123" label="ENSMUSG00000049670" cy:nodeId="407">
    <graphics y="-101.79032594801004" x="433.5199039262752" z="0.0"/>
  </node>
  <node id="25122" label="ENSMUSG00000049409" cy:nodeId="408">
    <graphics y="-301.96649629713113" x="-202.74773523388103" z="0.0"/>
  </node>
  <node id="25121" label="ENSMUSG00000049044" cy:nodeId="409">
    <graphics y="-381.9673202717405" x="251.20596960010334" z="0.0"/>
  </node>
  <node id="25120" label="ENSMUSG00000047749" cy:nodeId="410">
    <graphics y="-84.79404146314675" x="169.13996007861897" z="0.0"/>
  </node>
  <node id="25119" label="ENSMUSG00000047641" cy:nodeId="411">
    <graphics y="229.09289090990012" x="-306.92679712352947" z="0.0"/>
  </node>
  <node id="25118" label="ENSMUSG00000042675" cy:nodeId="412">
    <graphics y="174.45185392259543" x="425.1084049028377" z="0.0"/>
  </node>
  <node id="25117" label="ENSMUSG00000041995" cy:nodeId="413">
    <graphics y="-157.04773409009988" x="177.51508214893147" z="0.0"/>
  </node>
  <node id="25116" label="ENSMUSG00000040987" cy:nodeId="414">
    <graphics y="-479.4368026936155" x="55.40968969287678" z="0.0"/>
  </node>
  <node id="25115" label="ENSMUSG00000040747" cy:nodeId="415">
    <graphics y="139.27871244310325" x="-364.22171899852947" z="0.0"/>
  </node>
  <node id="25114" label="ENSMUSG00000040605" cy:nodeId="416">
    <graphics y="242.44182889818137" x="298.36673620166584" z="0.0"/>
  </node>
  <node id="25113" label="ENSMUSG00000039419" cy:nodeId="417">
    <graphics y="465.8915664470095" x="-141.04301187572673" z="0.0"/>
  </node>
  <node id="25112" label="ENSMUSG00000039103" cy:nodeId="418">
    <graphics y="52.93595426439231" x="-369.3347103315373" z="0.0"/>
  </node>
  <node id="25111" label="ENSMUSG00000038312" cy:nodeId="419">
    <graphics y="426.03335111497825" x="169.8022220415096" z="0.0"/>
  </node>
  <node id="25110" label="ENSMUSG00000038112" cy:nodeId="420">
    <graphics y="127.24097745775168" x="-197.05086633739666" z="0.0"/>
  </node>
  <node id="25109" label="ENSMUSG00000037617" cy:nodeId="421">
    <graphics y="437.09368436693137" x="-245.79214593944744" z="0.0"/>
  </node>
  <node id="25108" label="ENSMUSG00000037217" cy:nodeId="422">
    <graphics y="-457.29965669752175" x="-212.93302270946697" z="0.0"/>
  </node>
  <node id="25107" label="ENSMUSG00000036912" cy:nodeId="423">
    <graphics y="378.45351713060325" x="-139.0478698926945" z="0.0"/>
  </node>
  <node id="25106" label="ENSMUSG00000035930" cy:nodeId="424">
    <graphics y="449.93621366380637" x="87.47115209522053" z="0.0"/>
  </node>
  <node id="25105" label="ENSMUSG00000034871" cy:nodeId="425">
    <graphics y="-173.5285995686155" x="-303.15934106884197" z="0.0"/>
  </node>
  <node id="25104" label="ENSMUSG00000034591" cy:nodeId="426">
    <graphics y="138.99506681322043" x="303.3898685258846" z="0.0"/>
  </node>
  <node id="25103" label="ENSMUSG00000033083" cy:nodeId="427">
    <graphics y="97.19472806810325" x="10.641516475103344" z="0.0"/>
  </node>
  <node id="25102" label="ENSMUSG00000033033" cy:nodeId="428">
    <graphics y="68.78303830980246" x="-541.6422970014592" z="0.0"/>
  </node>
  <node id="25101" label="ENSMUSG00000032726" cy:nodeId="429">
    <graphics y="169.65259855150168" x="-280.3185054975529" z="0.0"/>
  </node>
  <node id="25100" label="ENSMUSG00000032679" cy:nodeId="430">
    <graphics y="-222.039463826428" x="-507.97185632763103" z="0.0"/>
  </node>
  <node id="25099" label="ENSMUSG00000032625" cy:nodeId="431">
    <graphics y="93.22819059251731" x="327.54862096729084" z="0.0"/>
  </node>
  <node id="25098" label="ENSMUSG00000032564" cy:nodeId="432">
    <graphics y="307.0502578532595" x="-104.21782419262126" z="0.0"/>
  </node>
  <node id="25097" label="ENSMUSG00000032377" cy:nodeId="433">
    <graphics y="-16.01977712751443" x="326.6608951372127" z="0.0"/>
  </node>
  <node id="25096" label="ENSMUSG00000032348" cy:nodeId="434">
    <graphics y="173.80747526048606" x="-618.5080806928654" z="0.0"/>
  </node>
  <node id="25095" label="ENSMUSG00000032192" cy:nodeId="435">
    <graphics y="369.60964506029075" x="-390.89080164013103" z="0.0"/>
  </node>
  <node id="25094" label="ENSMUSG00000032181" cy:nodeId="436">
    <graphics y="205.12893216966575" x="-383.17717859325603" z="0.0"/>
  </node>
  <node id="25093" label="ENSMUSG00000032086" cy:nodeId="437">
    <graphics y="-193.69379121900613" x="285.2086246294002" z="0.0"/>
  </node>
  <node id="25092" label="ENSMUSG00000031635" cy:nodeId="438">
    <graphics y="62.62231748460715" x="90.8022220415096" z="0.0"/>
  </node>
  <node id="25091" label="ENSMUSG00000031430" cy:nodeId="439">
    <graphics y="433.3688613688845" x="-58.31699487743572" z="0.0"/>
  </node>
  <node id="25090" label="ENSMUSG00000031253" cy:nodeId="440">
    <graphics y="-169.4976394856077" x="-473.2736751752873" z="0.0"/>
  </node>
  <node id="25089" label="ENSMUSG00000030518" cy:nodeId="441">
    <graphics y="288.8535110270876" x="266.7641666215877" z="0.0"/>
  </node>
  <node id="25088" label="ENSMUSG00000029821" cy:nodeId="442">
    <graphics y="-540.7977035725218" x="-189.12985536632732" z="0.0"/>
  </node>
  <node id="25087" label="ENSMUSG00000029283" cy:nodeId="443">
    <graphics y="-279.12213594556863" x="6.516989497564282" z="0.0"/>
  </node>
  <node id="25086" label="ENSMUSG00000028933" cy:nodeId="444">
    <graphics y="165.09121244310325" x="167.61878087940022" z="0.0"/>
  </node>
  <node id="25085" label="ENSMUSG00000028713" cy:nodeId="445">
    <graphics y="479.444911173572" x="177.59802892627522" z="0.0"/>
  </node>
  <node id="25084" label="ENSMUSG00000028438" cy:nodeId="446">
    <graphics y="-89.65006715894754" x="279.3587405961971" z="0.0"/>
  </node>
  <node id="25083" label="ENSMUSG00000028262" cy:nodeId="447">
    <graphics y="81.41772001146262" x="333.38739660205647" z="0.0"/>
  </node>
  <node id="25082" label="ENSMUSG00000027350" cy:nodeId="448">
    <graphics y="400.0688125407595" x="13.451575068853344" z="0.0"/>
  </node>
  <node id="25081" label="ENSMUSG00000027297" cy:nodeId="449">
    <graphics y="121.0326797282595" x="-673.3471615034123" z="0.0"/>
  </node>
  <node id="25080" label="ENSMUSG00000026531" cy:nodeId="450">
    <graphics y="-255.8139236652952" x="-312.31585046825603" z="0.0"/>
  </node>
  <node id="25079" label="ENSMUSG00000026489" cy:nodeId="451">
    <graphics y="-170.47848970533425" x="329.4401614946346" z="0.0"/>
  </node>
  <node id="25078" label="ENSMUSG00000026432" cy:nodeId="452">
    <graphics y="214.827967814197" x="-116.52981683788494" z="0.0"/>
  </node>
  <node id="25077" label="ENSMUSG00000026389" cy:nodeId="453">
    <graphics y="81.38846128343528" x="-561.1790706830998" z="0.0"/>
  </node>
  <node id="25076" label="ENSMUSG00000026223" cy:nodeId="454">
    <graphics y="144.40830533861106" x="-18.341942997552906" z="0.0"/>
  </node>
  <node id="25075" label="ENSMUSG00000026204" cy:nodeId="455">
    <graphics y="311.1881973063845" x="-421.19939539013103" z="0.0"/>
  </node>
  <node id="25074" label="ENSMUSG00000025665" cy:nodeId="456">
    <graphics y="-130.8690307819944" x="-449.85088464794353" z="0.0"/>
  </node>
  <node id="25073" label="ENSMUSG00000025592" cy:nodeId="457">
    <graphics y="524.138270548572" x="133.61270788135334" z="0.0"/>
  </node>
  <node id="25072" label="ENSMUSG00000025528" cy:nodeId="458">
    <graphics y="-90.22795564771707" x="-352.7753383832951" z="0.0"/>
  </node>
  <node id="25071" label="ENSMUSG00000025497" cy:nodeId="459">
    <graphics y="-21.894609280834743" x="-437.0339595991154" z="0.0"/>
  </node>
  <node id="25070" label="ENSMUSG00000025403" cy:nodeId="460">
    <graphics y="-293.1645858967405" x="-145.4811603742619" z="0.0"/>
  </node>
  <node id="25069" label="ENSMUSG00000024990" cy:nodeId="461">
    <graphics y="291.56142728685325" x="-35.62027856884197" z="0.0"/>
  </node>
  <node id="25068" label="ENSMUSG00000024730" cy:nodeId="462">
    <graphics y="192.71740262865012" x="81.25235631885334" z="0.0"/>
  </node>
  <node id="25067" label="ENSMUSG00000024084" cy:nodeId="463">
    <graphics y="-395.57184297681863" x="386.58832433643147" z="0.0"/>
  </node>
  <node id="25066" label="ENSMUSG00000023906" cy:nodeId="464">
    <graphics y="-228.81244356275613" x="-144.3214933591862" z="0.0"/>
  </node>
  <node id="25065" label="ENSMUSG00000023078" cy:nodeId="465">
    <graphics y="-50.00206644178445" x="-439.53792688427166" z="0.0"/>
  </node>
  <node id="25064" label="ENSMUSG00000022705" cy:nodeId="466">
    <graphics y="324.9496719157595" x="119.39447668018147" z="0.0"/>
  </node>
  <node id="25063" label="ENSMUSG00000021763" cy:nodeId="467">
    <graphics y="187.32537382005637" x="-311.7144558149357" z="0.0"/>
  </node>
  <node id="25062" label="ENSMUSG00000021541" cy:nodeId="468">
    <graphics y="194.18471830247825" x="424.45038488330647" z="0.0"/>
  </node>
  <node id="25061" label="ENSMUSG00000020651" cy:nodeId="469">
    <graphics y="249.44109647630637" x="-40.16873285350994" z="0.0"/>
  </node>
  <node id="25060" label="ENSMUSG00000020143" cy:nodeId="470">
    <graphics y="32.22367017625754" x="-352.6323024946232" z="0.0"/>
  </node>
  <node id="25059" label="ENSMUSG00000019467" cy:nodeId="471">
    <graphics y="616.6923476970095" x="147.33270910205647" z="0.0"/>
  </node>
  <node id="25058" label="ENSMUSG00000018581" cy:nodeId="472">
    <graphics y="-123.52988893629129" x="-484.78035852489666" z="0.0"/>
  </node>
  <node id="25057" label="ENSMUSG00000015829" cy:nodeId="473">
    <graphics y="486.4516555583376" x="-265.1885006147404" z="0.0"/>
  </node>
  <node id="25056" label="ENSMUSG00000014846" cy:nodeId="474">
    <graphics y="-132.13253481031472" x="275.2575748247127" z="0.0"/>
  </node>
  <node id="25055" label="ENSMUSG00000008575" cy:nodeId="475">
    <graphics y="252.29519193529075" x="6.072302607915844" z="0.0"/>
  </node>
  <node id="25054" label="ENSMUSG00000000632" cy:nodeId="476">
    <graphics y="-462.24384004713113" x="36.04930761279866" z="0.0"/>
  </node>
  <node id="25053" label="ENSMUSG00000111709" cy:nodeId="477">
    <graphics y="-192.0783279621702" x="-431.77925989208416" z="0.0"/>
  </node>
  <node id="25052" label="ENSMUSG00000103392" cy:nodeId="478">
    <graphics y="-353.66571504713113" x="-107.5219967084904" z="0.0"/>
  </node>
  <node id="25051" label="ENSMUSG00000096146" cy:nodeId="479">
    <graphics y="383.9703323161501" x="99.6652591508846" z="0.0"/>
  </node>
  <node id="25050" label="ENSMUSG00000095930" cy:nodeId="480">
    <graphics y="330.4836074626345" x="-601.8462459760685" z="0.0"/>
  </node>
  <node id="25049" label="ENSMUSG00000095567" cy:nodeId="481">
    <graphics y="-27.582137891064235" x="115.26123693408772" z="0.0"/>
  </node>
  <node id="25048" label="ENSMUSG00000094305" cy:nodeId="482">
    <graphics y="334.22365873216575" x="-557.4620296674748" z="0.0"/>
  </node>
  <node id="25047" label="ENSMUSG00000091721" cy:nodeId="483">
    <graphics y="-386.63971407056863" x="-317.2018825727482" z="0.0"/>
  </node>
  <node id="25046" label="ENSMUSG00000091243" cy:nodeId="484">
    <graphics y="46.730189493884495" x="229.18616369190022" z="0.0"/>
  </node>
  <node id="25045" label="ENSMUSG00000090291" cy:nodeId="485">
    <graphics y="24.72880857347434" x="-576.9481441694279" z="0.0"/>
  </node>
  <node id="25044" label="ENSMUSG00000089901" cy:nodeId="486">
    <graphics y="245.19317167161887" x="206.63025548877522" z="0.0"/>
  </node>
  <node id="25043" label="ENSMUSG00000087230" cy:nodeId="487">
    <graphics y="96.94733732103293" x="353.15177038135334" z="0.0"/>
  </node>
  <node id="25042" label="ENSMUSG00000083282" cy:nodeId="488">
    <graphics y="-298.77972871900613" x="-28.065591068841968" z="0.0"/>
  </node>
  <node id="25041" label="ENSMUSG00000081769" cy:nodeId="489">
    <graphics y="105.14900510667746" x="-365.5086910444279" z="0.0"/>
  </node>
  <node id="25040" label="ENSMUSG00000079497" cy:nodeId="490">
    <graphics y="163.6924239909548" x="-321.1521999555607" z="0.0"/>
  </node>
  <node id="25039" label="ENSMUSG00000079056" cy:nodeId="491">
    <graphics y="-208.96374971509988" x="334.9468753618221" z="0.0"/>
  </node>
  <node id="25038" label="ENSMUSG00000079015" cy:nodeId="492">
    <graphics y="-44.36940843702371" x="-321.52120325145916" z="0.0"/>
  </node>
  <node id="25037" label="ENSMUSG00000078776" cy:nodeId="493">
    <graphics y="-251.24101717115457" x="437.2622134965877" z="0.0"/>
  </node>
  <node id="25036" label="ENSMUSG00000078521" cy:nodeId="494">
    <graphics y="411.5097305095095" x="-566.5454342084904" z="0.0"/>
  </node>
  <node id="25035" label="ENSMUSG00000078502" cy:nodeId="495">
    <graphics y="316.6752578532595" x="-238.97129175243572" z="0.0"/>
  </node>
  <node id="25034" label="ENSMUSG00000078485" cy:nodeId="496">
    <graphics y="-179.26088411451394" x="-349.01616785106853" z="0.0"/>
  </node>
  <node id="25033" label="ENSMUSG00000078234" cy:nodeId="497">
    <graphics y="-209.47324068189675" x="-259.3181850629826" z="0.0"/>
  </node>
  <node id="25032" label="ENSMUSG00000078185" cy:nodeId="498">
    <graphics y="-70.53865511060769" x="-223.57298395214275" z="0.0"/>
  </node>
  <node id="25031" label="ENSMUSG00000075610" cy:nodeId="499">
    <graphics y="190.66547696947043" x="-104.74273798046306" z="0.0"/>
  </node>
  <node id="25030" label="ENSMUSG00000075289" cy:nodeId="500">
    <graphics y="-362.663975545178" x="-118.87672540722087" z="0.0"/>
  </node>
  <node id="25029" label="ENSMUSG00000075270" cy:nodeId="501">
    <graphics y="83.07202451585715" x="-233.79802820263103" z="0.0"/>
  </node>
  <node id="25028" label="ENSMUSG00000075012" cy:nodeId="502">
    <graphics y="-219.76201326490457" x="-330.19312402782634" z="0.0"/>
  </node>
  <node id="25027" label="ENSMUSG00000074882" cy:nodeId="503">
    <graphics y="292.34438627122825" x="107.90909460010334" z="0.0"/>
  </node>
  <node id="25026" label="ENSMUSG00000074867" cy:nodeId="504">
    <graphics y="639.4128677165407" x="-235.65290948925212" z="0.0"/>
  </node>
  <node id="25025" label="ENSMUSG00000074825" cy:nodeId="505">
    <graphics y="-370.22116548658425" x="-128.1169388013859" z="0.0"/>
  </node>
  <node id="25024" label="ENSMUSG00000074651" cy:nodeId="506">
    <graphics y="-231.04767305494363" x="-98.4054653364201" z="0.0"/>
  </node>
  <node id="25023" label="ENSMUSG00000074625" cy:nodeId="507">
    <graphics y="-298.8797653400999" x="-35.20801660595134" z="0.0"/>
  </node>
  <node id="25022" label="ENSMUSG00000074004" cy:nodeId="508">
    <graphics y="-401.758457967053" x="-147.3450290876408" z="0.0"/>
  </node>
  <node id="25021" label="ENSMUSG00000073889" cy:nodeId="509">
    <graphics y="145.86561124681418" x="-308.5190670209904" z="0.0"/>
  </node>
  <node id="25020" label="ENSMUSG00000073705" cy:nodeId="510">
    <graphics y="-289.2059372150999" x="-228.5868389326115" z="0.0"/>
  </node>
  <node id="25019" label="ENSMUSG00000073680" cy:nodeId="511">
    <graphics y="294.8593398845095" x="-416.7947017866154" z="0.0"/>
  </node>
  <node id="25018" label="ENSMUSG00000073530" cy:nodeId="512">
    <graphics y="133.2621261393923" x="-542.3499691205998" z="0.0"/>
  </node>
  <node id="25017" label="ENSMUSG00000073293" cy:nodeId="513">
    <graphics y="-422.201817342053" x="-30.972542973138843" z="0.0"/>
  </node>
  <node id="25016" label="ENSMUSG00000072875" cy:nodeId="514">
    <graphics y="184.1372482097048" x="200.73322179736897" z="0.0"/>
  </node>
  <node id="25015" label="ENSMUSG00000072849" cy:nodeId="515">
    <graphics y="-208.47621614576394" x="59.615637568853344" z="0.0"/>
  </node>
  <node id="25014" label="ENSMUSG00000072812" cy:nodeId="516">
    <graphics y="-11.05737764478738" x="303.6076419633846" z="0.0"/>
  </node>
  <node id="25013" label="ENSMUSG00000072623" cy:nodeId="517">
    <graphics y="-324.87924654127175" x="-51.36936304149822" z="0.0"/>
  </node>
  <node id="25012" label="ENSMUSG00000072294" cy:nodeId="518">
    <graphics y="-36.30791170240457" x="-325.72794458446697" z="0.0"/>
  </node>
  <node id="25011" label="ENSMUSG00000071984" cy:nodeId="519">
    <graphics y="-263.5257614338499" x="65.09883764209553" z="0.0"/>
  </node>
  <node id="25010" label="ENSMUSG00000071856" cy:nodeId="520">
    <graphics y="-140.02682191968972" x="305.0485904497127" z="0.0"/>
  </node>
  <node id="25009" label="ENSMUSG00000071847" cy:nodeId="521">
    <graphics y="-293.3445175373655" x="-28.066842289545093" z="0.0"/>
  </node>
  <node id="25008" label="ENSMUSG00000071553" cy:nodeId="522">
    <graphics y="-6.140513249645778" x="-153.13235208568767" z="0.0"/>
  </node>
  <node id="25007" label="ENSMUSG00000071551" cy:nodeId="523">
    <graphics y="-3.293907948742458" x="-393.44161340770916" z="0.0"/>
  </node>
  <node id="25006" label="ENSMUSG00000071226" cy:nodeId="524">
    <graphics y="-3.1239593708615985" x="-204.97379800853923" z="0.0"/>
  </node>
  <node id="25005" label="ENSMUSG00000070687" cy:nodeId="525">
    <graphics y="217.85517423509543" x="57.72014501514241" z="0.0"/>
  </node>
  <node id="25004" label="ENSMUSG00000070577" cy:nodeId="526">
    <graphics y="-194.64169771314675" x="-154.42600938854412" z="0.0"/>
  </node>
  <node id="25003" label="ENSMUSG00000070423" cy:nodeId="527">
    <graphics y="258.37661283372825" x="342.83368566455647" z="0.0"/>
  </node>
  <node id="25002" label="ENSMUSG00000070366" cy:nodeId="528">
    <graphics y="67.22641294359153" x="-140.10868761120037" z="0.0"/>
  </node>
  <node id="25001" label="ENSMUSG00000070034" cy:nodeId="529">
    <graphics y="-345.48312837720925" x="-591.5974361616154" z="0.0"/>
  </node>
  <node id="25000" label="ENSMUSG00000069922" cy:nodeId="530">
    <graphics y="-132.1142395222288" x="293.06122472705647" z="0.0"/>
  </node>
  <node id="24999" label="ENSMUSG00000069920" cy:nodeId="531">
    <graphics y="-80.1892440998655" x="-266.3239528852482" z="0.0"/>
  </node>
  <node id="24998" label="ENSMUSG00000069792" cy:nodeId="532">
    <graphics y="139.76902311204856" x="143.77039220752522" z="0.0"/>
  </node>
  <node id="24997" label="ENSMUSG00000068270" cy:nodeId="533">
    <graphics y="-267.79843599439675" x="144.12503698291584" z="0.0"/>
  </node>
  <node id="24996" label="ENSMUSG00000068154" cy:nodeId="534">
    <graphics y="24.70508115648215" x="-53.918839665033374" z="0.0"/>
  </node>
  <node id="24995" label="ENSMUSG00000067818" cy:nodeId="535">
    <graphics y="369.2510940349001" x="117.30106237354084" z="0.0"/>
  </node>
  <node id="24994" label="ENSMUSG00000067750" cy:nodeId="536">
    <graphics y="129.47594755052512" x="217.18985631885334" z="0.0"/>
  </node>
  <node id="24993" label="ENSMUSG00000066607" cy:nodeId="537">
    <graphics y="207.2270156657595" x="-228.60743829784587" z="0.0"/>
  </node>
  <node id="24992" label="ENSMUSG00000066191" cy:nodeId="538">
    <graphics y="62.205462626208714" x="257.4680240434627" z="0.0"/>
  </node>
  <node id="24991" label="ENSMUSG00000064326" cy:nodeId="539">
    <graphics y="-385.5122116291624" x="136.76734044971272" z="0.0"/>
  </node>
  <node id="24990" label="ENSMUSG00000064177" cy:nodeId="540">
    <graphics y="-323.57819063306863" x="164.19702794971272" z="0.0"/>
  </node>
  <node id="24989" label="ENSMUSG00000064165" cy:nodeId="541">
    <graphics y="100.44334714769309" x="263.51740148486897" z="0.0"/>
  </node>
  <node id="24988" label="ENSMUSG00000064158" cy:nodeId="542">
    <graphics y="-380.8596542561155" x="-167.66023561535076" z="0.0"/>
  </node>
  <node id="24987" label="ENSMUSG00000064109" cy:nodeId="543">
    <graphics y="-309.70673067213113" x="36.422461299322094" z="0.0"/>
  </node>
  <node id="24986" label="ENSMUSG00000064080" cy:nodeId="544">
    <graphics y="93.76572721361106" x="230.0010745805721" z="0.0"/>
  </node>
  <node id="24985" label="ENSMUSG00000063929" cy:nodeId="545">
    <graphics y="319.6860305583376" x="297.8912112993221" z="0.0"/>
  </node>
  <node id="24984" label="ENSMUSG00000063851" cy:nodeId="546">
    <graphics y="-204.82793123365457" x="-48.35046503124431" z="0.0"/>
  </node>
  <node id="24983" label="ENSMUSG00000063727" cy:nodeId="547">
    <graphics y="234.5981094157595" x="370.7551334184627" z="0.0"/>
  </node>
  <node id="24982" label="ENSMUSG00000063704" cy:nodeId="548">
    <graphics y="-314.37677461744363" x="-238.8261425214787" z="0.0"/>
  </node>
  <node id="24981" label="ENSMUSG00000063142" cy:nodeId="549">
    <graphics y="19.509040049304417" x="-189.18857690868572" z="0.0"/>
  </node>
  <node id="24980" label="ENSMUSG00000062995" cy:nodeId="550">
    <graphics y="78.41623227952903" x="-213.36131403026775" z="0.0"/>
  </node>
  <node id="24979" label="ENSMUSG00000062826" cy:nodeId="551">
    <graphics y="-221.56482393384988" x="-78.10357019481853" z="0.0"/>
  </node>
  <node id="24978" label="ENSMUSG00000062410" cy:nodeId="552">
    <graphics y="-214.44696504713113" x="87.2438724321346" z="0.0"/>
  </node>
  <node id="24977" label="ENSMUSG00000062252" cy:nodeId="553">
    <graphics y="-71.38437349439675" x="-456.86211511669353" z="0.0"/>
  </node>
  <node id="24976" label="ENSMUSG00000062210" cy:nodeId="554">
    <graphics y="-77.91586000562722" x="49.81862523975178" z="0.0"/>
  </node>
  <node id="24975" label="ENSMUSG00000062184" cy:nodeId="555">
    <graphics y="-346.7661178791624" x="-35.60381433544353" z="0.0"/>
  </node>
  <node id="24974" label="ENSMUSG00000061601" cy:nodeId="556">
    <graphics y="-353.8017929279905" x="-18.981454105951343" z="0.0"/>
  </node>
  <node id="24973" label="ENSMUSG00000061462" cy:nodeId="557">
    <graphics y="101.39393155931418" x="279.18924596729084" z="0.0"/>
  </node>
  <node id="24972" label="ENSMUSG00000061292" cy:nodeId="558">
    <graphics y="-199.01483614088113" x="82.3969486040096" z="0.0"/>
  </node>
  <node id="24971" label="ENSMUSG00000060961" cy:nodeId="559">
    <graphics y="88.80901639818137" x="-215.3702633100529" z="0.0"/>
  </node>
  <node id="24970" label="ENSMUSG00000060615" cy:nodeId="560">
    <graphics y="-328.100010701428" x="-4.132363529779468" z="0.0"/>
  </node>
  <node id="24969" label="ENSMUSG00000060600" cy:nodeId="561">
    <graphics y="300.00359647630637" x="-227.63125726757244" z="0.0"/>
  </node>
  <node id="24968" label="ENSMUSG00000060208" cy:nodeId="562">
    <graphics y="-436.39963228345925" x="-142.49072191295818" z="0.0"/>
  </node>
  <node id="24967" label="ENSMUSG00000059493" cy:nodeId="563">
    <graphics y="-238.2101638996702" x="39.865088252447094" z="0.0"/>
  </node>
  <node id="24966" label="ENSMUSG00000059406" cy:nodeId="564">
    <graphics y="279.6805373942751" x="-190.15783044872478" z="0.0"/>
  </node>
  <node id="24965" label="ENSMUSG00000059149" cy:nodeId="565">
    <graphics y="225.55846708177512" x="-40.191674442865406" z="0.0"/>
  </node>
  <node id="24964" label="ENSMUSG00000058740" cy:nodeId="566">
    <graphics y="133.51000516771262" x="-276.1057064252873" z="0.0"/>
  </node>
  <node id="24963" label="ENSMUSG00000058392" cy:nodeId="567">
    <graphics y="-122.83235628248269" x="382.66730382861897" z="0.0"/>
  </node>
  <node id="24962" label="ENSMUSG00000058063" cy:nodeId="568">
    <graphics y="-39.814915486584255" x="-407.0255062299748" z="0.0"/>
  </node>
  <node id="24961" label="ENSMUSG00000057933" cy:nodeId="569">
    <graphics y="174.8686172282595" x="20.14563634815022" z="0.0"/>
  </node>
  <node id="24960" label="ENSMUSG00000057897" cy:nodeId="570">
    <graphics y="265.6313430583376" x="-397.63082239208416" z="0.0"/>
  </node>
  <node id="24959" label="ENSMUSG00000057614" cy:nodeId="571">
    <graphics y="-71.96125871778543" x="-349.53402063427166" z="0.0"/>
  </node>
  <node id="24958" label="ENSMUSG00000057604" cy:nodeId="572">
    <graphics y="128.82854764818137" x="-176.78766557750896" z="0.0"/>
  </node>
  <node id="24957" label="ENSMUSG00000057541" cy:nodeId="573">
    <graphics y="-149.12321931959207" x="-457.5732662397404" z="0.0"/>
  </node>
  <node id="24956" label="ENSMUSG00000057406" cy:nodeId="574">
    <graphics y="-178.7859237873655" x="137.99597814502522" z="0.0"/>
  </node>
  <node id="24955" label="ENSMUSG00000057400" cy:nodeId="575">
    <graphics y="-61.08348543287332" x="-446.85210535106853" z="0.0"/>
  </node>
  <node id="24954" label="ENSMUSG00000057182" cy:nodeId="576">
    <graphics y="-312.33197481275613" x="-216.852586002924" z="0.0"/>
  </node>
  <node id="24953" label="ENSMUSG00000057092" cy:nodeId="577">
    <graphics y="-88.38766176343972" x="53.88573339404866" z="0.0"/>
  </node>
  <node id="24952" label="ENSMUSG00000056724" cy:nodeId="578">
    <graphics y="149.76484220384543" x="359.5255191606502" z="0.0"/>
  </node>
  <node id="24951" label="ENSMUSG00000056648" cy:nodeId="579">
    <graphics y="53.8458892619509" x="-176.84739419994548" z="0.0"/>
  </node>
  <node id="24950" label="ENSMUSG00000056050" cy:nodeId="580">
    <graphics y="-79.28221590162332" x="-36.02501031933025" z="0.0"/>
  </node>
  <node id="24949" label="ENSMUSG00000056035" cy:nodeId="581">
    <graphics y="-44.35570222974832" x="-440.5440609174748" z="0.0"/>
  </node>
  <node id="24948" label="ENSMUSG00000055980" cy:nodeId="582">
    <graphics y="63.132228068103245" x="190.83234289111897" z="0.0"/>
  </node>
  <node id="24947" label="ENSMUSG00000055978" cy:nodeId="583">
    <graphics y="277.8617812907595" x="115.26215246143147" z="0.0"/>
  </node>
  <node id="24946" label="ENSMUSG00000055912" cy:nodeId="584">
    <graphics y="-256.3601425373655" x="98.55281713428303" z="0.0"/>
  </node>
  <node id="24945" label="ENSMUSG00000055862" cy:nodeId="585">
    <graphics y="227.62620084642356" x="-144.2198612409611" z="0.0"/>
  </node>
  <node id="24944" label="ENSMUSG00000055809" cy:nodeId="586">
    <graphics y="360.197596720447" x="203.35831335010334" z="0.0"/>
  </node>
  <node id="24943" label="ENSMUSG00000055745" cy:nodeId="587">
    <graphics y="11.371594599475316" x="-158.43910905895427" z="0.0"/>
  </node>
  <node id="24942" label="ENSMUSG00000055730" cy:nodeId="588">
    <graphics y="59.11272733568137" x="-321.5587093549748" z="0.0"/>
  </node>
  <node id="24941" label="ENSMUSG00000055629" cy:nodeId="589">
    <graphics y="-164.3381698811155" x="-57.80050775585369" z="0.0"/>
  </node>
  <node id="24940" label="ENSMUSG00000055610" cy:nodeId="590">
    <graphics y="76.63135068773215" x="-443.32647058544353" z="0.0"/>
  </node>
  <node id="24939" label="ENSMUSG00000055567" cy:nodeId="591">
    <graphics y="-195.55336458326394" x="-261.98098871288494" z="0.0"/>
  </node>
  <node id="24938" label="ENSMUSG00000055493" cy:nodeId="592">
    <graphics y="-369.9870651447874" x="38.93176916065022" z="0.0"/>
  </node>
  <node id="24937" label="ENSMUSG00000055210" cy:nodeId="593">
    <graphics y="267.20778959154075" x="109.97321203174397" z="0.0"/>
  </node>
  <node id="24936" label="ENSMUSG00000055172" cy:nodeId="594">
    <graphics y="354.54250638841575" x="-421.5512630659123" z="0.0"/>
  </node>
  <node id="24935" label="ENSMUSG00000054932" cy:nodeId="595">
    <graphics y="-106.58089143873269" x="48.51325109424397" z="0.0"/>
  </node>
  <node id="24934" label="ENSMUSG00000054764" cy:nodeId="596">
    <graphics y="201.35932462572043" x="-264.484177799799" z="0.0"/>
  </node>
  <node id="24933" label="ENSMUSG00000054659" cy:nodeId="597">
    <graphics y="381.36321561693137" x="-96.82693597850994" z="0.0"/>
  </node>
  <node id="24932" label="ENSMUSG00000054630" cy:nodeId="598">
    <graphics y="-284.14291841627175" x="83.80464818897053" z="0.0"/>
  </node>
  <node id="24931" label="ENSMUSG00000054555" cy:nodeId="599">
    <graphics y="-199.13451082349832" x="290.1453922075252" z="0.0"/>
  </node>
  <node id="24930" label="ENSMUSG00000054484" cy:nodeId="600">
    <graphics y="-442.5884140217405" x="3.9644840044002194" z="0.0"/>
  </node>
  <node id="24929" label="ENSMUSG00000054146" cy:nodeId="601">
    <graphics y="199.04835050462668" x="122.33020666065022" z="0.0"/>
  </node>
  <node id="24928" label="ENSMUSG00000054034" cy:nodeId="602">
    <graphics y="351.696864298572" x="-248.73101160106853" z="0.0"/>
  </node>
  <node id="24927" label="ENSMUSG00000053852" cy:nodeId="603">
    <graphics y="92.13926999925559" x="-435.0626156049748" z="0.0"/>
  </node>
  <node id="24926" label="ENSMUSG00000053765" cy:nodeId="604">
    <graphics y="87.86025541185325" x="-309.6367122846623" z="0.0"/>
  </node>
  <node id="24925" label="ENSMUSG00000053702" cy:nodeId="605">
    <graphics y="453.44451444505637" x="-223.61934778270916" z="0.0"/>
  </node>
  <node id="24924" label="ENSMUSG00000053310" cy:nodeId="606">
    <graphics y="342.766932657947" x="253.05621984424397" z="0.0"/>
  </node>
  <node id="24923" label="ENSMUSG00000053279" cy:nodeId="607">
    <graphics y="-61.547955342541286" x="-186.05983469066814" z="0.0"/>
  </node>
  <node id="24922" label="ENSMUSG00000053219" cy:nodeId="608">
    <graphics y="-6.255726643810817" x="209.4954593461971" z="0.0"/>
  </node>
  <node id="24921" label="ENSMUSG00000053158" cy:nodeId="609">
    <graphics y="189.61472623704856" x="359.09686925830647" z="0.0"/>
  </node>
  <node id="24920" label="ENSMUSG00000053046" cy:nodeId="610">
    <graphics y="310.33782499193137" x="220.1967532915096" z="0.0"/>
  </node>
  <node id="24919" label="ENSMUSG00000053004" cy:nodeId="611">
    <graphics y="412.69594877122825" x="196.12390783252522" z="0.0"/>
  </node>
  <node id="24918" label="ENSMUSG00000052921" cy:nodeId="612">
    <graphics y="-60.543194600353786" x="-224.98484918651775" z="0.0"/>
  </node>
  <node id="24917" label="ENSMUSG00000052852" cy:nodeId="613">
    <graphics y="-195.71996004224832" x="-312.3857662397404" z="0.0"/>
  </node>
  <node id="24916" label="ENSMUSG00000052364" cy:nodeId="614">
    <graphics y="-372.27194673658425" x="365.46149328174397" z="0.0"/>
  </node>
  <node id="24915" label="ENSMUSG00000052271" cy:nodeId="615">
    <graphics y="9.15297620653098" x="-51.60596582470134" z="0.0"/>
  </node>
  <node id="24914" label="ENSMUSG00000052212" cy:nodeId="616">
    <graphics y="-325.65021211744363" x="32.59778478565022" z="0.0"/>
  </node>
  <node id="24913" label="ENSMUSG00000052062" cy:nodeId="617">
    <graphics y="-70.59596712232644" x="205.71228673877522" z="0.0"/>
  </node>
  <node id="24912" label="ENSMUSG00000051980" cy:nodeId="618">
    <graphics y="50.75830381273215" x="304.2431705278377" z="0.0"/>
  </node>
  <node id="24911" label="ENSMUSG00000051951" cy:nodeId="619">
    <graphics y="-1.378582783947536" x="187.3041751665096" z="0.0"/>
  </node>
  <node id="24910" label="ENSMUSG00000051517" cy:nodeId="620">
    <graphics y="-258.26689607740457" x="188.24396398486897" z="0.0"/>
  </node>
  <node id="24909" label="ENSMUSG00000051314" cy:nodeId="621">
    <graphics y="310.34048002122825" x="-48.698022099115406" z="0.0"/>
  </node>
  <node id="24908" label="ENSMUSG00000051251" cy:nodeId="622">
    <graphics y="-68.30932314039285" x="290.7319400590877" z="0.0"/>
  </node>
  <node id="24907" label="ENSMUSG00000051209" cy:nodeId="623">
    <graphics y="-256.06601411939675" x="-245.8105480390568" z="0.0"/>
  </node>
  <node id="24906" label="ENSMUSG00000051067" cy:nodeId="624">
    <graphics y="239.60915677904075" x="127.3309085649471" z="0.0"/>
  </node>
  <node id="24905" label="ENSMUSG00000051043" cy:nodeId="625">
    <graphics y="50.852870157946995" x="-116.4996807294865" z="0.0"/>
  </node>
  <node id="24904" label="ENSMUSG00000051003" cy:nodeId="626">
    <graphics y="-261.9006393635374" x="-256.42913171825603" z="0.0"/>
  </node>
  <node id="24903" label="ENSMUSG00000050824" cy:nodeId="627">
    <graphics y="-128.86263734937722" x="-322.35929224071697" z="0.0"/>
  </node>
  <node id="24902" label="ENSMUSG00000050751" cy:nodeId="628">
    <graphics y="90.23759000657981" x="149.8550784868221" z="0.0"/>
  </node>
  <node id="24901" label="ENSMUSG00000050711" cy:nodeId="629">
    <graphics y="-221.3965194904905" x="-46.507836552240406" z="0.0"/>
  </node>
  <node id="24900" label="ENSMUSG00000050520" cy:nodeId="630">
    <graphics y="58.29937284349387" x="248.29450109424397" z="0.0"/>
  </node>
  <node id="24899" label="ENSMUSG00000050511" cy:nodeId="631">
    <graphics y="-204.67119295240457" x="234.89154699268147" z="0.0"/>
  </node>
  <node id="24898" label="ENSMUSG00000050505" cy:nodeId="632">
    <graphics y="382.81304471849387" x="-388.80005762157634" z="0.0"/>
  </node>
  <node id="24897" label="ENSMUSG00000050473" cy:nodeId="633">
    <graphics y="407.62905423997825" x="-11.107140751459156" z="0.0"/>
  </node>
  <node id="24896" label="ENSMUSG00000050447" cy:nodeId="634">
    <graphics y="-223.13963777662332" x="11.804846553228344" z="0.0"/>
  </node>
  <node id="24895" label="ENSMUSG00000050410" cy:nodeId="635">
    <graphics y="429.2858535563845" x="124.17987707080647" z="0.0"/>
  </node>
  <node id="24894" label="ENSMUSG00000050359" cy:nodeId="636">
    <graphics y="163.40723722337668" x="286.9401614946346" z="0.0"/>
  </node>
  <node id="24893" label="ENSMUSG00000050321" cy:nodeId="637">
    <graphics y="87.41284482835715" x="-522.1037533002873" z="0.0"/>
  </node>
  <node id="24892" label="ENSMUSG00000050234" cy:nodeId="638">
    <graphics y="-157.38979036451394" x="251.56342199268147" z="0.0"/>
  </node>
  <node id="24891" label="ENSMUSG00000049536" cy:nodeId="639">
    <graphics y="554.7953750407595" x="-208.37424585399822" z="0.0"/>
  </node>
  <node id="24890" label="ENSMUSG00000049307" cy:nodeId="640">
    <graphics y="400.57464139818137" x="375.42316320361897" z="0.0"/>
  </node>
  <node id="24889" label="ENSMUSG00000048911" cy:nodeId="641">
    <graphics y="397.4910842692751" x="-12.604394169427906" z="0.0"/>
  </node>
  <node id="24888" label="ENSMUSG00000048905" cy:nodeId="642">
    <graphics y="294.2294570720095" x="2.7395389360408444" z="0.0"/>
  </node>
  <node id="24887" label="ENSMUSG00000048899" cy:nodeId="643">
    <graphics y="-500.91135103345925" x="-60.288354130365406" z="0.0"/>
  </node>
  <node id="24886" label="ENSMUSG00000048807" cy:nodeId="644">
    <graphics y="-228.65099031568582" x="-587.6806881147404" z="0.0"/>
  </node>
  <node id="24885" label="ENSMUSG00000048776" cy:nodeId="645">
    <graphics y="88.66598813890403" x="-227.5691845136662" z="0.0"/>
  </node>
  <node id="24884" label="ENSMUSG00000048330" cy:nodeId="646">
    <graphics y="152.52312772630637" x="17.098501948736157" z="0.0"/>
  </node>
  <node id="24883" label="ENSMUSG00000048200" cy:nodeId="647">
    <graphics y="-518.5824936115843" x="503.8408267778377" z="0.0"/>
  </node>
  <node id="24882" label="ENSMUSG00000048078" cy:nodeId="648">
    <graphics y="281.31389921068137" x="171.3072269243221" z="0.0"/>
  </node>
  <node id="24881" label="ENSMUSG00000047996" cy:nodeId="649">
    <graphics y="-73.60644991041238" x="-239.72715112743572" z="0.0"/>
  </node>
  <node id="24880" label="ENSMUSG00000047963" cy:nodeId="650">
    <graphics y="-5.874953099499294" x="-290.7064449506779" z="0.0"/>
  </node>
  <node id="24879" label="ENSMUSG00000047730" cy:nodeId="651">
    <graphics y="111.60699003099387" x="-349.74984094677166" z="0.0"/>
  </node>
  <node id="24878" label="ENSMUSG00000047702" cy:nodeId="652">
    <graphics y="345.4573928630251" x="-291.26509973583416" z="0.0"/>
  </node>
  <node id="24877" label="ENSMUSG00000047473" cy:nodeId="653">
    <graphics y="-38.46963579298074" x="25.19501378955647" z="0.0"/>
  </node>
  <node id="24876" label="ENSMUSG00000047344" cy:nodeId="654">
    <graphics y="213.89580839036887" x="-260.0532238203068" z="0.0"/>
  </node>
  <node id="24875" label="ENSMUSG00000046841" cy:nodeId="655">
    <graphics y="148.30736844896262" x="173.16223791065022" z="0.0"/>
  </node>
  <node id="24874" label="ENSMUSG00000046613" cy:nodeId="656">
    <graphics y="342.1674453532595" x="-139.67182085094646" z="0.0"/>
  </node>
  <node id="24873" label="ENSMUSG00000046589" cy:nodeId="657">
    <graphics y="157.13695829271262" x="-59.742028446771656" z="0.0"/>
  </node>
  <node id="24872" label="ENSMUSG00000046480" cy:nodeId="658">
    <graphics y="274.83425443529075" x="-247.0323192792912" z="0.0"/>
  </node>
  <node id="24871" label="ENSMUSG00000046442" cy:nodeId="659">
    <graphics y="-365.6448105061155" x="191.52432897510334" z="0.0"/>
  </node>
  <node id="24870" label="ENSMUSG00000046402" cy:nodeId="660">
    <graphics y="100.5447418010134" x="-407.0447017866154" z="0.0"/>
  </node>
  <node id="24869" label="ENSMUSG00000046352" cy:nodeId="661">
    <graphics y="-26.359433480511257" x="-193.0947963911076" z="0.0"/>
  </node>
  <node id="24868" label="ENSMUSG00000046295" cy:nodeId="662">
    <graphics y="167.77367704271262" x="292.6858890336971" z="0.0"/>
  </node>
  <node id="24867" label="ENSMUSG00000046215" cy:nodeId="663">
    <graphics y="-111.8513534748655" x="-104.62850687084392" z="0.0"/>
  </node>
  <node id="24866" label="ENSMUSG00000046204" cy:nodeId="664">
    <graphics y="109.90699308275168" x="-269.9166500288029" z="0.0"/>
  </node>
  <node id="24865" label="ENSMUSG00000046178" cy:nodeId="665">
    <graphics y="436.72930448411887" x="234.94544103565022" z="0.0"/>
  </node>
  <node id="24864" label="ENSMUSG00000046160" cy:nodeId="666">
    <graphics y="-207.4064529621702" x="-73.0240719038029" z="0.0"/>
  </node>
  <node id="24863" label="ENSMUSG00000046070" cy:nodeId="667">
    <graphics y="100.63007657884543" x="149.97699621143147" z="0.0"/>
  </node>
  <node id="24862" label="ENSMUSG00000046058" cy:nodeId="668">
    <graphics y="-32.66139680982644" x="-299.4461605268498" z="0.0"/>
  </node>
  <node id="24861" label="ENSMUSG00000045912" cy:nodeId="669">
    <graphics y="-399.48007661939675" x="-218.36356470165447" z="0.0"/>
  </node>
  <node id="24860" label="ENSMUSG00000045871" cy:nodeId="670">
    <graphics y="-121.36983186842019" x="268.3573062700252" z="0.0"/>
  </node>
  <node id="24859" label="ENSMUSG00000045790" cy:nodeId="671">
    <graphics y="-106.3955658161741" x="-123.73787424144939" z="0.0"/>
  </node>
  <node id="24858" label="ENSMUSG00000045763" cy:nodeId="672">
    <graphics y="-54.20941621900613" x="488.9873111528377" z="0.0"/>
  </node>
  <node id="24857" label="ENSMUSG00000045281" cy:nodeId="673">
    <graphics y="-340.0787399494749" x="-287.3919460493107" z="0.0"/>
  </node>
  <node id="24856" label="ENSMUSG00000045273" cy:nodeId="674">
    <graphics y="342.1771194255251" x="-164.23505374965862" z="0.0"/>
  </node>
  <node id="24855" label="ENSMUSG00000045215" cy:nodeId="675">
    <graphics y="-13.986345597515651" x="-241.2770473676701" z="0.0"/>
  </node>
  <node id="24854" label="ENSMUSG00000045064" cy:nodeId="676">
    <graphics y="407.86989896654075" x="-249.0285885053654" z="0.0"/>
  </node>
  <node id="24853" label="ENSMUSG00000044912" cy:nodeId="677">
    <graphics y="267.3256789958376" x="-203.68583032665447" z="0.0"/>
  </node>
  <node id="24852" label="ENSMUSG00000044646" cy:nodeId="678">
    <graphics y="-74.09928590894754" x="109.0058353227596" z="0.0"/>
  </node>
  <node id="24851" label="ENSMUSG00000044626" cy:nodeId="679">
    <graphics y="-139.27710420728738" x="-360.6573726850529" z="0.0"/>
  </node>
  <node id="24850" label="ENSMUSG00000044468" cy:nodeId="680">
    <graphics y="-379.08749849439675" x="160.91470983447834" z="0.0"/>
  </node>
  <node id="24849" label="ENSMUSG00000044313" cy:nodeId="681">
    <graphics y="-377.84662325025613" x="147.53363683643147" z="0.0"/>
  </node>
  <node id="24848" label="ENSMUSG00000044033" cy:nodeId="682">
    <graphics y="206.68903653978293" x="-217.39412042675212" z="0.0"/>
  </node>
  <node id="24847" label="ENSMUSG00000044017" cy:nodeId="683">
    <graphics y="21.1432525432009" x="-269.693894596674" z="0.0"/>
  </node>
  <node id="24846" label="ENSMUSG00000043461" cy:nodeId="684">
    <graphics y="-27.75818616987283" x="-321.4375240522404" z="0.0"/>
  </node>
  <node id="24845" label="ENSMUSG00000043419" cy:nodeId="685">
    <graphics y="135.51002042650168" x="94.21828344287678" z="0.0"/>
  </node>
  <node id="24844" label="ENSMUSG00000043388" cy:nodeId="686">
    <graphics y="-369.11639864088113" x="-144.47592088756755" z="0.0"/>
  </node>
  <node id="24843" label="ENSMUSG00000043029" cy:nodeId="687">
    <graphics y="-29.94371111036355" x="81.99025609912678" z="0.0"/>
  </node>
  <node id="24842" label="ENSMUSG00000043015" cy:nodeId="688">
    <graphics y="68.27427976488059" x="23.25733068408772" z="0.0"/>
  </node>
  <node id="24841" label="ENSMUSG00000042942" cy:nodeId="689">
    <graphics y="121.12978666185325" x="-162.9875557142277" z="0.0"/>
  </node>
  <node id="24840" label="ENSMUSG00000042842" cy:nodeId="690">
    <graphics y="-213.23715669752175" x="-192.02877161083416" z="0.0"/>
  </node>
  <node id="24839" label="ENSMUSG00000042804" cy:nodeId="691">
    <graphics y="268.7529250895876" x="143.9605472368221" z="0.0"/>
  </node>
  <node id="24838" label="ENSMUSG00000042763" cy:nodeId="692">
    <graphics y="-33.05282289625222" x="179.75702550830647" z="0.0"/>
  </node>
  <node id="24837" label="ENSMUSG00000042750" cy:nodeId="693">
    <graphics y="170.95627897142356" x="674.3082950395565" z="0.0"/>
  </node>
  <node id="24836" label="ENSMUSG00000042712" cy:nodeId="694">
    <graphics y="-19.931847401867458" x="-284.3869411664982" z="0.0"/>
  </node>
  <node id="24835" label="ENSMUSG00000042631" cy:nodeId="695">
    <graphics y="84.69878690599387" x="111.35559728565022" z="0.0"/>
  </node>
  <node id="24834" label="ENSMUSG00000042515" cy:nodeId="696">
    <graphics y="397.5490371501345" x="102.1825931352596" z="0.0"/>
  </node>
  <node id="24833" label="ENSMUSG00000042371" cy:nodeId="697">
    <graphics y="-26.162088223705837" x="35.82326391162678" z="0.0"/>
  </node>
  <node id="24832" label="ENSMUSG00000042306" cy:nodeId="698">
    <graphics y="-197.07884676099832" x="-286.95281335888103" z="0.0"/>
  </node>
  <node id="24831" label="ENSMUSG00000042303" cy:nodeId="699">
    <graphics y="350.4875442302126" x="-80.6352779584904" z="0.0"/>
  </node>
  <node id="24830" label="ENSMUSG00000042215" cy:nodeId="700">
    <graphics y="-235.77841646314675" x="8.177786616704907" z="0.0"/>
  </node>
  <node id="24829" label="ENSMUSG00000042179" cy:nodeId="701">
    <graphics y="281.68984525560325" x="80.7903354448299" z="0.0"/>
  </node>
  <node id="24828" label="ENSMUSG00000042041" cy:nodeId="702">
    <graphics y="56.89930265306418" x="-326.4260189252873" z="0.0"/>
  </node>
  <node id="24827" label="ENSMUSG00000041974" cy:nodeId="703">
    <graphics y="-402.65607149244363" x="6.518896846197094" z="0.0"/>
  </node>
  <node id="24826" label="ENSMUSG00000041889" cy:nodeId="704">
    <graphics y="13.049060038318089" x="-340.3635036664982" z="0.0"/>
  </node>
  <node id="24825" label="ENSMUSG00000041801" cy:nodeId="705">
    <graphics y="74.84458463548606" x="-343.2248012739201" z="0.0"/>
  </node>
  <node id="24824" label="ENSMUSG00000041794" cy:nodeId="706">
    <graphics y="92.65061490892356" x="-335.47933313427166" z="0.0"/>
  </node>
  <node id="24823" label="ENSMUSG00000041734" cy:nodeId="707">
    <graphics y="350.36236112474387" x="-285.9087154584904" z="0.0"/>
  </node>
  <node id="24822" label="ENSMUSG00000041729" cy:nodeId="708">
    <graphics y="-294.6135299885374" x="-45.64922449169353" z="0.0"/>
  </node>
  <node id="24821" label="ENSMUSG00000041688" cy:nodeId="709">
    <graphics y="138.91550748704856" x="24.228934077642407" z="0.0"/>
  </node>
  <node id="24820" label="ENSMUSG00000041658" cy:nodeId="710">
    <graphics y="41.04412382005637" x="-416.72823450145916" z="0.0"/>
  </node>
  <node id="24819" label="ENSMUSG00000041608" cy:nodeId="711">
    <graphics y="-29.566764661083766" x="-221.83396265087322" z="0.0"/>
  </node>
  <node id="24818" label="ENSMUSG00000041577" cy:nodeId="712">
    <graphics y="-179.63654024244363" x="-2.0799495893497806" z="0.0"/>
  </node>
  <node id="24817" label="ENSMUSG00000041476" cy:nodeId="713">
    <graphics y="-392.20416719556863" x="-217.2258007246037" z="0.0"/>
  </node>
  <node id="24816" label="ENSMUSG00000041420" cy:nodeId="714">
    <graphics y="-159.48973543287332" x="-375.03052637157634" z="0.0"/>
  </node>
  <node id="24815" label="ENSMUSG00000041406" cy:nodeId="715">
    <graphics y="498.2148086345095" x="277.95780065479084" z="0.0"/>
  </node>
  <node id="24814" label="ENSMUSG00000041351" cy:nodeId="716">
    <graphics y="282.6239883220095" x="13.558249263189282" z="0.0"/>
  </node>
  <node id="24813" label="ENSMUSG00000041323" cy:nodeId="717">
    <graphics y="-159.1675155842405" x="-603.2611934858342" z="0.0"/>
  </node>
  <node id="24812" label="ENSMUSG00000041301" cy:nodeId="718">
    <graphics y="509.27944486497825" x="-136.79753419933513" z="0.0"/>
  </node>
  <node id="24811" label="ENSMUSG00000041268" cy:nodeId="719">
    <graphics y="35.3534576213259" x="-351.10376855907634" z="0.0"/>
  </node>
  <node id="24810" label="ENSMUSG00000041261" cy:nodeId="720">
    <graphics y="232.37253873704856" x="-374.70545312938884" z="0.0"/>
  </node>
  <node id="24809" label="ENSMUSG00000041000" cy:nodeId="721">
    <graphics y="101.52184598802512" x="-22.183266850091968" z="0.0"/>
  </node>
  <node id="24808" label="ENSMUSG00000040972" cy:nodeId="722">
    <graphics y="43.49442594407981" x="-324.94796106395916" z="0.0"/>
  </node>
  <node id="24807" label="ENSMUSG00000040891" cy:nodeId="723">
    <graphics y="-39.676670857678005" x="-70.81450769481853" z="0.0"/>
  </node>
  <node id="24806" label="ENSMUSG00000040714" cy:nodeId="724">
    <graphics y="150.7700607097048" x="-131.3167144971867" z="0.0"/>
  </node>
  <node id="24805" label="ENSMUSG00000040694" cy:nodeId="725">
    <graphics y="-95.9724472248655" x="312.1941898149471" z="0.0"/>
  </node>
  <node id="24804" label="ENSMUSG00000040613" cy:nodeId="726">
    <graphics y="329.3920547282595" x="81.49379613818928" z="0.0"/>
  </node>
  <node id="24803" label="ENSMUSG00000040584" cy:nodeId="727">
    <graphics y="-261.7744186604124" x="-185.7427169996281" z="0.0"/>
  </node>
  <node id="24802" label="ENSMUSG00000040433" cy:nodeId="728">
    <graphics y="-7.9742401325803485" x="72.16075780811116" z="0.0"/>
  </node>
  <node id="24801" label="ENSMUSG00000040389" cy:nodeId="729">
    <graphics y="-108.59762270093972" x="370.30756261768147" z="0.0"/>
  </node>
  <node id="24800" label="ENSMUSG00000040387" cy:nodeId="730">
    <graphics y="-435.9553573811155" x="-88.01944086132244" z="0.0"/>
  </node>
  <node id="24799" label="ENSMUSG00000040181" cy:nodeId="731">
    <graphics y="-6.09122545362527" x="91.24909093799397" z="0.0"/>
  </node>
  <node id="24798" label="ENSMUSG00000040170" cy:nodeId="732">
    <graphics y="-46.72679216505105" x="231.40479162158772" z="0.0"/>
  </node>
  <node id="24797" label="ENSMUSG00000040152" cy:nodeId="733">
    <graphics y="-100.895420857678" x="-133.44842454967693" z="0.0"/>
  </node>
  <node id="24796" label="ENSMUSG00000040121" cy:nodeId="734">
    <graphics y="272.92559354661887" x="-346.9560482221623" z="0.0"/>
  </node>
  <node id="24795" label="ENSMUSG00000040118" cy:nodeId="735">
    <graphics y="-20.934454747448513" x="355.15582921924397" z="0.0"/>
  </node>
  <node id="24794" label="ENSMUSG00000040016" cy:nodeId="736">
    <graphics y="-295.2209518635374" x="-209.1825191694279" z="0.0"/>
  </node>
  <node id="24793" label="ENSMUSG00000039831" cy:nodeId="737">
    <graphics y="-75.0385101521116" x="-202.0736553388615" z="0.0"/>
  </node>
  <node id="24792" label="ENSMUSG00000039809" cy:nodeId="738">
    <graphics y="8.577935389270237" x="-295.5501186567326" z="0.0"/>
  </node>
  <node id="24791" label="ENSMUSG00000039765" cy:nodeId="739">
    <graphics y="-121.97602541090066" x="2.4515445512752194" z="0.0"/>
  </node>
  <node id="24790" label="ENSMUSG00000039748" cy:nodeId="740">
    <graphics y="-29.280114957104274" x="226.99939611377522" z="0.0"/>
  </node>
  <node id="24789" label="ENSMUSG00000039629" cy:nodeId="741">
    <graphics y="94.13594358323996" x="-2.4134151655216556" z="0.0"/>
  </node>
  <node id="24788" label="ENSMUSG00000039601" cy:nodeId="742">
    <graphics y="-369.21173555494363" x="-10.855492802240406" z="0.0"/>
  </node>
  <node id="24787" label="ENSMUSG00000039396" cy:nodeId="743">
    <graphics y="332.9210159099001" x="-120.7219936567326" z="0.0"/>
  </node>
  <node id="24786" label="ENSMUSG00000039200" cy:nodeId="744">
    <graphics y="270.59353177904075" x="241.3174808305721" z="0.0"/>
  </node>
  <node id="24785" label="ENSMUSG00000039187" cy:nodeId="745">
    <graphics y="-126.75691682935769" x="140.1145999711971" z="0.0"/>
  </node>
  <node id="24784" label="ENSMUSG00000038903" cy:nodeId="746">
    <graphics y="-92.089756795178" x="-89.07328149852947" z="0.0"/>
  </node>
  <node id="24783" label="ENSMUSG00000038692" cy:nodeId="747">
    <graphics y="20.8432037150759" x="-39.068749638177906" z="0.0"/>
  </node>
  <node id="24782" label="ENSMUSG00000038560" cy:nodeId="748">
    <graphics y="122.01842801927512" x="391.98187902393147" z="0.0"/>
  </node>
  <node id="24781" label="ENSMUSG00000038555" cy:nodeId="749">
    <graphics y="242.47405546068137" x="-13.292138310052906" z="0.0"/>
  </node>
  <node id="24780" label="ENSMUSG00000038349" cy:nodeId="750">
    <graphics y="-60.93008501173074" x="-112.1548549848576" z="0.0"/>
  </node>
  <node id="24779" label="ENSMUSG00000038305" cy:nodeId="751">
    <graphics y="115.14814298509543" x="279.1512210649471" z="0.0"/>
  </node>
  <node id="24778" label="ENSMUSG00000038296" cy:nodeId="752">
    <graphics y="143.64455716966575" x="-191.64194604931072" z="0.0"/>
  </node>
  <node id="24777" label="ENSMUSG00000038209" cy:nodeId="753">
    <graphics y="218.2751876628298" x="57.98863866748616" z="0.0"/>
  </node>
  <node id="24776" label="ENSMUSG00000037973" cy:nodeId="754">
    <graphics y="-124.29144746900613" x="165.9338138383846" z="0.0"/>
  </node>
  <node id="24775" label="ENSMUSG00000037962" cy:nodeId="755">
    <graphics y="-82.90177232862527" x="-94.79182931957439" z="0.0"/>
  </node>
  <node id="24774" label="ENSMUSG00000037942" cy:nodeId="756">
    <graphics y="256.001551798572" x="-150.6667663770695" z="0.0"/>
  </node>
  <node id="24773" label="ENSMUSG00000037852" cy:nodeId="757">
    <graphics y="-33.85269243360574" x="-368.1669399457951" z="0.0"/>
  </node>
  <node id="24772" label="ENSMUSG00000037784" cy:nodeId="758">
    <graphics y="-312.12167818189675" x="-110.05747720775798" z="0.0"/>
  </node>
  <node id="24771" label="ENSMUSG00000037762" cy:nodeId="759">
    <graphics y="-267.97568208814675" x="-302.5902034955998" z="0.0"/>
  </node>
  <node id="24770" label="ENSMUSG00000037725" cy:nodeId="760">
    <graphics y="312.2350723063845" x="70.39101293506428" z="0.0"/>
  </node>
  <node id="24769" label="ENSMUSG00000037712" cy:nodeId="761">
    <graphics y="-61.41195375562722" x="328.44562414111897" z="0.0"/>
  </node>
  <node id="24768" label="ENSMUSG00000037624" cy:nodeId="762">
    <graphics y="-207.5323074543577" x="-172.05803796825603" z="0.0"/>
  </node>
  <node id="24767" label="ENSMUSG00000037621" cy:nodeId="763">
    <graphics y="53.42719571947043" x="-12.157571049310718" z="0.0"/>
  </node>
  <node id="24766" label="ENSMUSG00000037509" cy:nodeId="764">
    <graphics y="-332.5927780354124" x="7.496039180181469" z="0.0"/>
  </node>
  <node id="24765" label="ENSMUSG00000037474" cy:nodeId="765">
    <graphics y="497.90468900560325" x="441.90033605518147" z="0.0"/>
  </node>
  <node id="24764" label="ENSMUSG00000037275" cy:nodeId="766">
    <graphics y="-329.80841524244363" x="186.93537023486897" z="0.0"/>
  </node>
  <node id="24763" label="ENSMUSG00000037126" cy:nodeId="767">
    <graphics y="-618.4167831623655" x="-253.0977260786076" z="0.0"/>
  </node>
  <node id="24762" label="ENSMUSG00000037106" cy:nodeId="768">
    <graphics y="101.61310880540793" x="-243.2792675214787" z="0.0"/>
  </node>
  <node id="24761" label="ENSMUSG00000037035" cy:nodeId="769">
    <graphics y="19.497821024646214" x="184.78406408252522" z="0.0"/>
  </node>
  <node id="24760" label="ENSMUSG00000037033" cy:nodeId="770">
    <graphics y="377.59694974779075" x="-13.558678837396656" z="0.0"/>
  </node>
  <node id="24759" label="ENSMUSG00000036995" cy:nodeId="771">
    <graphics y="-198.36386568189675" x="-29.721032353021656" z="0.0"/>
  </node>
  <node id="24758" label="ENSMUSG00000036989" cy:nodeId="772">
    <graphics y="-274.39853365064675" x="284.02924230518147" z="0.0"/>
  </node>
  <node id="24757" label="ENSMUSG00000036944" cy:nodeId="773">
    <graphics y="181.47779386400168" x="-236.91500207958416" z="0.0"/>
  </node>
  <node id="24756" label="ENSMUSG00000036872" cy:nodeId="774">
    <graphics y="315.13662259935325" x="-431.74825403270916" z="0.0"/>
  </node>
  <node id="24755" label="ENSMUSG00000036782" cy:nodeId="775">
    <graphics y="235.1535293376345" x="290.67926671924397" z="0.0"/>
  </node>
  <node id="24754" label="ENSMUSG00000036766" cy:nodeId="776">
    <graphics y="333.2514297282595" x="-179.68570062694744" z="0.0"/>
  </node>
  <node id="24753" label="ENSMUSG00000036492" cy:nodeId="777">
    <graphics y="262.8031875407595" x="177.1583011430721" z="0.0"/>
  </node>
  <node id="24752" label="ENSMUSG00000036437" cy:nodeId="778">
    <graphics y="-5.430463620434352" x="-357.23804590282634" z="0.0"/>
  </node>
  <node id="24751" label="ENSMUSG00000036327" cy:nodeId="779">
    <graphics y="78.7489883220095" x="-146.5006229597111" z="0.0"/>
  </node>
  <node id="24750" label="ENSMUSG00000036304" cy:nodeId="780">
    <graphics y="232.88157194017356" x="92.54112890186116" z="0.0"/>
  </node>
  <node id="24749" label="ENSMUSG00000036225" cy:nodeId="781">
    <graphics y="293.56536405443137" x="-191.63939401684001" z="0.0"/>
  </node>
  <node id="24748" label="ENSMUSG00000036053" cy:nodeId="782">
    <graphics y="276.25701444505637" x="150.99933507861897" z="0.0"/>
  </node>
  <node id="24747" label="ENSMUSG00000035984" cy:nodeId="783">
    <graphics y="403.17519681810325" x="-211.42226144848064" z="0.0"/>
  </node>
  <node id="24746" label="ENSMUSG00000035896" cy:nodeId="784">
    <graphics y="197.37578885911887" x="-455.0216304975529" z="0.0"/>
  </node>
  <node id="24745" label="ENSMUSG00000035775" cy:nodeId="785">
    <graphics y="508.3637344157595" x="-25.525857182123218" z="0.0"/>
  </node>
  <node id="24744" label="ENSMUSG00000035699" cy:nodeId="786">
    <graphics y="69.79993741868918" x="-356.74007532177166" z="0.0"/>
  </node>
  <node id="24743" label="ENSMUSG00000035683" cy:nodeId="787">
    <graphics y="-359.75717622877175" x="196.9944827836971" z="0.0"/>
  </node>
  <node id="24742" label="ENSMUSG00000035615" cy:nodeId="788">
    <graphics y="214.76636808275168" x="-154.2569057661076" z="0.0"/>
  </node>
  <node id="24741" label="ENSMUSG00000035431" cy:nodeId="789">
    <graphics y="-237.40549165845925" x="-192.01322290477947" z="0.0"/>
  </node>
  <node id="24740" label="ENSMUSG00000035390" cy:nodeId="790">
    <graphics y="-259.15155489088113" x="264.3428714555721" z="0.0"/>
  </node>
  <node id="24739" label="ENSMUSG00000035277" cy:nodeId="791">
    <graphics y="161.28498380540793" x="-255.08802148876384" z="0.0"/>
  </node>
  <node id="24738" label="ENSMUSG00000035200" cy:nodeId="792">
    <graphics y="230.75615995286887" x="293.34854772510334" z="0.0"/>
  </node>
  <node id="24737" label="ENSMUSG00000034785" cy:nodeId="793">
    <graphics y="-291.0310409748655" x="137.31473424854084" z="0.0"/>
  </node>
  <node id="24736" label="ENSMUSG00000034677" cy:nodeId="794">
    <graphics y="-105.46689302564675" x="321.81732824268147" z="0.0"/>
  </node>
  <node id="24735" label="ENSMUSG00000034675" cy:nodeId="795">
    <graphics y="-111.03684694410379" x="242.4501712602596" z="0.0"/>
  </node>
  <node id="24734" label="ENSMUSG00000034656" cy:nodeId="796">
    <graphics y="-162.95905000806863" x="-284.00525781688884" z="0.0"/>
  </node>
  <node id="24733" label="ENSMUSG00000034648" cy:nodeId="797">
    <graphics y="281.56585233568137" x="-259.2035839277287" z="0.0"/>
  </node>
  <node id="24732" label="ENSMUSG00000034528" cy:nodeId="798">
    <graphics y="260.5859023845095" x="194.96610143604084" z="0.0"/>
  </node>
  <node id="24731" label="ENSMUSG00000034472" cy:nodeId="799">
    <graphics y="-249.9346054279905" x="31.642493037603344" z="0.0"/>
  </node>
  <node id="24730" label="ENSMUSG00000034303" cy:nodeId="800">
    <graphics y="-158.55421907545144" x="-142.77277299938396" z="0.0"/>
  </node>
  <node id="24729" label="ENSMUSG00000034118" cy:nodeId="801">
    <graphics y="-32.69762498975808" x="193.00333288135334" z="0.0"/>
  </node>
  <node id="24728" label="ENSMUSG00000034112" cy:nodeId="802">
    <graphics y="111.13469999193137" x="-71.08770105419353" z="0.0"/>
  </node>
  <node id="24727" label="ENSMUSG00000033871" cy:nodeId="803">
    <graphics y="-36.39850885511453" x="-126.62508508739666" z="0.0"/>
  </node>
  <node id="24726" label="ENSMUSG00000033825" cy:nodeId="804">
    <graphics y="-232.84613496900613" x="-126.33315202770427" z="0.0"/>
  </node>
  <node id="24725" label="ENSMUSG00000033763" cy:nodeId="805">
    <graphics y="-62.14614946485574" x="220.34473302783772" z="0.0"/>
  </node>
  <node id="24724" label="ENSMUSG00000033634" cy:nodeId="806">
    <graphics y="176.61919706224387" x="630.744452266119" z="0.0"/>
  </node>
  <node id="24723" label="ENSMUSG00000033590" cy:nodeId="807">
    <graphics y="243.0087539470095" x="13.456412104986157" z="0.0"/>
  </node>
  <node id="24722" label="ENSMUSG00000033579" cy:nodeId="808">
    <graphics y="-324.3118026936155" x="-86.41855737743572" z="0.0"/>
  </node>
  <node id="24721" label="ENSMUSG00000033389" cy:nodeId="809">
    <graphics y="250.91741483568137" x="-504.5230648237248" z="0.0"/>
  </node>
  <node id="24720" label="ENSMUSG00000033222" cy:nodeId="810">
    <graphics y="167.0535079753298" x="-15.23790857372478" z="0.0"/>
  </node>
  <node id="24719" label="ENSMUSG00000033200" cy:nodeId="811">
    <graphics y="458.57879178880637" x="129.62048986377522" z="0.0"/>
  </node>
  <node id="24718" label="ENSMUSG00000033177" cy:nodeId="812">
    <graphics y="-199.3263748371702" x="143.44855382861897" z="0.0"/>
  </node>
  <node id="24717" label="ENSMUSG00000033032" cy:nodeId="813">
    <graphics y="268.7000686442751" x="-132.9317161756535" z="0.0"/>
  </node>
  <node id="24716" label="ENSMUSG00000033022" cy:nodeId="814">
    <graphics y="-213.59869844556863" x="-206.39435312328533" z="0.0"/>
  </node>
  <node id="24715" label="ENSMUSG00000032854" cy:nodeId="815">
    <graphics y="45.02141111253684" x="269.9953372758846" z="0.0"/>
  </node>
  <node id="24714" label="ENSMUSG00000032852" cy:nodeId="816">
    <graphics y="-259.3372696125608" x="-136.78615305004314" z="0.0"/>
  </node>
  <node id="24713" label="ENSMUSG00000032586" cy:nodeId="817">
    <graphics y="159.8695937907595" x="-399.90870019970134" z="0.0"/>
  </node>
  <node id="24712" label="ENSMUSG00000032558" cy:nodeId="818">
    <graphics y="384.8461868083376" x="-280.05840417919353" z="0.0"/>
  </node>
  <node id="24711" label="ENSMUSG00000032532" cy:nodeId="819">
    <graphics y="165.56264798997825" x="260.66046789111897" z="0.0"/>
  </node>
  <node id="24710" label="ENSMUSG00000032502" cy:nodeId="820">
    <graphics y="-265.61957246900613" x="235.09625890674397" z="0.0"/>
  </node>
  <node id="24709" label="ENSMUSG00000032482" cy:nodeId="821">
    <graphics y="328.59682767747825" x="-258.8405544477482" z="0.0"/>
  </node>
  <node id="24708" label="ENSMUSG00000032420" cy:nodeId="822">
    <graphics y="-324.68027193189675" x="24.054541377447094" z="0.0"/>
  </node>
  <node id="24707" label="ENSMUSG00000032417" cy:nodeId="823">
    <graphics y="469.00799100755637" x="368.36054113330647" z="0.0"/>
  </node>
  <node id="24706" label="ENSMUSG00000032397" cy:nodeId="824">
    <graphics y="-32.205309697399684" x="-196.89822122631267" z="0.0"/>
  </node>
  <node id="24705" label="ENSMUSG00000032346" cy:nodeId="825">
    <graphics y="-275.29852754713113" x="278.4563052934627" z="0.0"/>
  </node>
  <node id="24704" label="ENSMUSG00000032315" cy:nodeId="826">
    <graphics y="-117.15652162672097" x="413.7662418169002" z="0.0"/>
  </node>
  <node id="24703" label="ENSMUSG00000032289" cy:nodeId="827">
    <graphics y="-8.892695256481716" x="-328.1493923383732" z="0.0"/>
  </node>
  <node id="24702" label="ENSMUSG00000032278" cy:nodeId="828">
    <graphics y="-240.87326509595925" x="212.94400670947834" z="0.0"/>
  </node>
  <node id="24701" label="ENSMUSG00000032238" cy:nodeId="829">
    <graphics y="-0.6593864643674578" x="-54.90191766796306" z="0.0"/>
  </node>
  <node id="24700" label="ENSMUSG00000032232" cy:nodeId="830">
    <graphics y="-185.95538789869363" x="-92.66710779247478" z="0.0"/>
  </node>
  <node id="24699" label="ENSMUSG00000032186" cy:nodeId="831">
    <graphics y="77.064295939197" x="95.37842443408772" z="0.0"/>
  </node>
  <node id="24698" label="ENSMUSG00000032113" cy:nodeId="832">
    <graphics y="326.25539701341575" x="68.08565404834553" z="0.0"/>
  </node>
  <node id="24697" label="ENSMUSG00000032092" cy:nodeId="833">
    <graphics y="-208.63229829908425" x="194.93045690479084" z="0.0"/>
  </node>
  <node id="24696" label="ENSMUSG00000032035" cy:nodeId="834">
    <graphics y="-2.7020557606321063" x="-45.06424829540447" z="0.0"/>
  </node>
  <node id="24695" label="ENSMUSG00000032034" cy:nodeId="835">
    <graphics y="82.93505399583762" x="29.253042964361157" z="0.0"/>
  </node>
  <node id="24694" label="ENSMUSG00000032017" cy:nodeId="836">
    <graphics y="230.82154386400168" x="-358.55950281200603" z="0.0"/>
  </node>
  <node id="24693" label="ENSMUSG00000032015" cy:nodeId="837">
    <graphics y="269.38906400560325" x="-255.14016840038494" z="0.0"/>
  </node>
  <node id="24692" label="ENSMUSG00000031981" cy:nodeId="838">
    <graphics y="-84.81726534009988" x="-40.22361108837322" z="0.0"/>
  </node>
  <node id="24691" label="ENSMUSG00000031980" cy:nodeId="839">
    <graphics y="47.02780454515403" x="196.50125768604084" z="0.0"/>
  </node>
  <node id="24690" label="ENSMUSG00000031919" cy:nodeId="840">
    <graphics y="-431.7009628498655" x="-53.98673364696697" z="0.0"/>
  </node>
  <node id="24689" label="ENSMUSG00000031849" cy:nodeId="841">
    <graphics y="-117.45624239088113" x="13.367468623540844" z="0.0"/>
  </node>
  <node id="24688" label="ENSMUSG00000031844" cy:nodeId="842">
    <graphics y="-311.83127290845925" x="-141.35833856640056" z="0.0"/>
  </node>
  <node id="24687" label="ENSMUSG00000031778" cy:nodeId="843">
    <graphics y="1.5864059245485578" x="-263.8126232343693" z="0.0"/>
  </node>
  <node id="24686" label="ENSMUSG00000031669" cy:nodeId="844">
    <graphics y="-307.0725448811155" x="182.90442541065022" z="0.0"/>
  </node>
  <node id="24685" label="ENSMUSG00000031626" cy:nodeId="845">
    <graphics y="-171.96222383619363" x="-385.41370508251384" z="0.0"/>
  </node>
  <node id="24684" label="ENSMUSG00000031562" cy:nodeId="846">
    <graphics y="-112.91882021070535" x="-184.94586679516033" z="0.0"/>
  </node>
  <node id="24683" label="ENSMUSG00000031558" cy:nodeId="847">
    <graphics y="-189.53026277662332" x="32.894446162603344" z="0.0"/>
  </node>
  <node id="24682" label="ENSMUSG00000031410" cy:nodeId="848">
    <graphics y="-177.69733125806863" x="-200.44501230297283" z="0.0"/>
  </node>
  <node id="24681" label="ENSMUSG00000031387" cy:nodeId="849">
    <graphics y="-165.80833894849832" x="-608.7183162885685" z="0.0"/>
  </node>
  <node id="24680" label="ENSMUSG00000031373" cy:nodeId="850">
    <graphics y="-203.10673982740457" x="234.72720983447834" z="0.0"/>
  </node>
  <node id="24679" label="ENSMUSG00000031355" cy:nodeId="851">
    <graphics y="92.77978055833762" x="-555.6635372358342" z="0.0"/>
  </node>
  <node id="24678" label="ENSMUSG00000031284" cy:nodeId="852">
    <graphics y="-373.8557480061155" x="21.29456212940022" z="0.0"/>
  </node>
  <node id="24677" label="ENSMUSG00000031262" cy:nodeId="853">
    <graphics y="-324.56525117994363" x="94.62926366748616" z="0.0"/>
  </node>
  <node id="24676" label="ENSMUSG00000031227" cy:nodeId="854">
    <graphics y="530.6560317790407" x="218.99561193408772" z="0.0"/>
  </node>
  <node id="24675" label="ENSMUSG00000031220" cy:nodeId="855">
    <graphics y="192.35351102708762" x="-259.63560602245525" z="0.0"/>
  </node>
  <node id="24674" label="ENSMUSG00000031150" cy:nodeId="856">
    <graphics y="383.7282668864626" x="-469.07759973583416" z="0.0"/>
  </node>
  <node id="24673" label="ENSMUSG00000031144" cy:nodeId="857">
    <graphics y="-456.833653279553" x="-156.81922242222026" z="0.0"/>
  </node>
  <node id="24672" label="ENSMUSG00000030978" cy:nodeId="858">
    <graphics y="417.51360624193137" x="-99.49833032665447" z="0.0"/>
  </node>
  <node id="24671" label="ENSMUSG00000030935" cy:nodeId="859">
    <graphics y="273.061610392322" x="-290.83516809520916" z="0.0"/>
  </node>
  <node id="24670" label="ENSMUSG00000030787" cy:nodeId="860">
    <graphics y="239.68642728685325" x="-293.02629968700603" z="0.0"/>
  </node>
  <node id="24669" label="ENSMUSG00000030772" cy:nodeId="861">
    <graphics y="-159.385411092053" x="-174.63892099437908" z="0.0"/>
  </node>
  <node id="24668" label="ENSMUSG00000030616" cy:nodeId="862">
    <graphics y="362.21197049974387" x="-126.24710390148357" z="0.0"/>
  </node>
  <node id="24667" label="ENSMUSG00000030543" cy:nodeId="863">
    <graphics y="18.155860117663792" x="320.88373449268147" z="0.0"/>
  </node>
  <node id="24666" label="ENSMUSG00000030401" cy:nodeId="864">
    <graphics y="216.83059232591575" x="-24.115670414545093" z="0.0"/>
  </node>
  <node id="24665" label="ENSMUSG00000030353" cy:nodeId="865">
    <graphics y="6.5611507213014875" x="-13.265694828607593" z="0.0"/>
  </node>
  <node id="24664" label="ENSMUSG00000030340" cy:nodeId="866">
    <graphics y="-61.72499925733621" x="-154.53590509472087" z="0.0"/>
  </node>
  <node id="24663" label="ENSMUSG00000030287" cy:nodeId="867">
    <graphics y="342.28115384935325" x="-162.636841030695" z="0.0"/>
  </node>
  <node id="24662" label="ENSMUSG00000030137" cy:nodeId="868">
    <graphics y="247.18505399583762" x="-273.5892040449162" z="0.0"/>
  </node>
  <node id="24661" label="ENSMUSG00000030110" cy:nodeId="869">
    <graphics y="45.75733487962668" x="-17.45476648388103" z="0.0"/>
  </node>
  <node id="24660" label="ENSMUSG00000030087" cy:nodeId="870">
    <graphics y="85.52854459642356" x="123.06107213916584" z="0.0"/>
  </node>
  <node id="24659" label="ENSMUSG00000030048" cy:nodeId="871">
    <graphics y="-161.3063553059202" x="167.11588170947834" z="0.0"/>
  </node>
  <node id="24658" label="ENSMUSG00000029865" cy:nodeId="872">
    <graphics y="-78.61096651197488" x="-532.8313228803654" z="0.0"/>
  </node>
  <node id="24657" label="ENSMUSG00000029862" cy:nodeId="873">
    <graphics y="-346.912022420178" x="-104.65025445995525" z="0.0"/>
  </node>
  <node id="24656" label="ENSMUSG00000029765" cy:nodeId="874">
    <graphics y="193.71764676927512" x="-311.00159570751384" z="0.0"/>
  </node>
  <node id="24655" label="ENSMUSG00000029762" cy:nodeId="875">
    <graphics y="204.33169095872825" x="-275.4629909711857" z="0.0"/>
  </node>
  <node id="24654" label="ENSMUSG00000029716" cy:nodeId="876">
    <graphics y="218.89588468431418" x="132.5083987993221" z="0.0"/>
  </node>
  <node id="24653" label="ENSMUSG00000029712" cy:nodeId="877">
    <graphics y="80.08442228197043" x="272.4367740434627" z="0.0"/>
  </node>
  <node id="24652" label="ENSMUSG00000029700" cy:nodeId="878">
    <graphics y="-380.77426607252175" x="-244.17645380077556" z="0.0"/>
  </node>
  <node id="24651" label="ENSMUSG00000029596" cy:nodeId="879">
    <graphics y="-225.71269685865457" x="-50.96121332225994" z="0.0"/>
  </node>
  <node id="24650" label="ENSMUSG00000029591" cy:nodeId="880">
    <graphics y="-336.0498092854124" x="-173.26651689586834" z="0.0"/>
  </node>
  <node id="24649" label="ENSMUSG00000029570" cy:nodeId="881">
    <graphics y="-258.8490036213499" x="36.068335322759594" z="0.0"/>
  </node>
  <node id="24648" label="ENSMUSG00000029541" cy:nodeId="882">
    <graphics y="-313.3481796467405" x="259.83966710986897" z="0.0"/>
  </node>
  <node id="24647" label="ENSMUSG00000029436" cy:nodeId="883">
    <graphics y="-290.0246628010374" x="-236.9982387739201" z="0.0"/>
  </node>
  <node id="24646" label="ENSMUSG00000029335" cy:nodeId="884">
    <graphics y="-65.19044954420144" x="-358.8595974164982" z="0.0"/>
  </node>
  <node id="24645" label="ENSMUSG00000029279" cy:nodeId="885">
    <graphics y="-27.98023683668191" x="258.49051549854084" z="0.0"/>
  </node>
  <node id="24644" label="ENSMUSG00000029195" cy:nodeId="886">
    <graphics y="63.20702665208762" x="-98.92891046581462" z="0.0"/>
  </node>
  <node id="24643" label="ENSMUSG00000029134" cy:nodeId="887">
    <graphics y="-301.6672714436155" x="-87.73826715526775" z="0.0"/>
  </node>
  <node id="24642" label="ENSMUSG00000029123" cy:nodeId="888">
    <graphics y="-329.91254121900613" x="10.17444494190022" z="0.0"/>
  </node>
  <node id="24641" label="ENSMUSG00000029121" cy:nodeId="889">
    <graphics y="87.70838468431418" x="-136.91255495128826" z="0.0"/>
  </node>
  <node id="24640" label="ENSMUSG00000029101" cy:nodeId="890">
    <graphics y="-238.9399002277952" x="-139.64771959362224" z="0.0"/>
  </node>
  <node id="24639" label="ENSMUSG00000029096" cy:nodeId="891">
    <graphics y="235.38213651536887" x="116.5993411821346" z="0.0"/>
  </node>
  <node id="24638" label="ENSMUSG00000029054" cy:nodeId="892">
    <graphics y="527.3629409587282" x="23.83307531299397" z="0.0"/>
  </node>
  <node id="24637" label="ENSMUSG00000028860" cy:nodeId="893">
    <graphics y="459.322596720447" x="-332.5781490522404" z="0.0"/>
  </node>
  <node id="24636" label="ENSMUSG00000028785" cy:nodeId="894">
    <graphics y="-355.2717636311155" x="-22.39171716747478" z="0.0"/>
  </node>
  <node id="24635" label="ENSMUSG00000028766" cy:nodeId="895">
    <graphics y="-142.3882873737913" x="75.75453832568928" z="0.0"/>
  </node>
  <node id="24634" label="ENSMUSG00000028631" cy:nodeId="896">
    <graphics y="111.24450223802512" x="-258.1492855268498" z="0.0"/>
  </node>
  <node id="24633" label="ENSMUSG00000028597" cy:nodeId="897">
    <graphics y="472.47234647630637" x="-3.7934505659122806" z="0.0"/>
  </node>
  <node id="24632" label="ENSMUSG00000028555" cy:nodeId="898">
    <graphics y="-157.9488113606077" x="-148.10933897075847" z="0.0"/>
  </node>
  <node id="24631" label="ENSMUSG00000028539" cy:nodeId="899">
    <graphics y="-223.59058076978738" x="312.51093175830647" z="0.0"/>
  </node>
  <node id="24630" label="ENSMUSG00000028532" cy:nodeId="900">
    <graphics y="95.91694944261496" x="180.5928714555721" z="0.0"/>
  </node>
  <node id="24629" label="ENSMUSG00000028457" cy:nodeId="901">
    <graphics y="-312.489170857678" x="-172.20960352001384" z="0.0"/>
  </node>
  <node id="24628" label="ENSMUSG00000028444" cy:nodeId="902">
    <graphics y="-35.84085447431619" x="-447.1470882612248" z="0.0"/>
  </node>
  <node id="24627" label="ENSMUSG00000028427" cy:nodeId="903">
    <graphics y="649.5333511149782" x="-72.32163354931072" z="0.0"/>
  </node>
  <node id="24626" label="ENSMUSG00000028415" cy:nodeId="904">
    <graphics y="-82.5596283161741" x="177.29389074268147" z="0.0"/>
  </node>
  <node id="24625" label="ENSMUSG00000028391" cy:nodeId="905">
    <graphics y="270.8385879313845" x="210.63284948291584" z="0.0"/>
  </node>
  <node id="24624" label="ENSMUSG00000028389" cy:nodeId="906">
    <graphics y="-386.860997029553" x="-89.75882837352947" z="0.0"/>
  </node>
  <node id="24623" label="ENSMUSG00000028356" cy:nodeId="907">
    <graphics y="346.6400100505251" x="-176.4834854322453" z="0.0"/>
  </node>
  <node id="24622" label="ENSMUSG00000028289" cy:nodeId="908">
    <graphics y="-180.48112947584207" x="-240.43560907421306" z="0.0"/>
  </node>
  <node id="24621" label="ENSMUSG00000028255" cy:nodeId="909">
    <graphics y="280.6630508220095" x="-353.3019039350529" z="0.0"/>
  </node>
  <node id="24620" label="ENSMUSG00000028236" cy:nodeId="910">
    <graphics y="444.23781888841575" x="140.57315710010334" z="0.0"/>
  </node>
  <node id="24619" label="ENSMUSG00000028226" cy:nodeId="911">
    <graphics y="156.27276151536887" x="-356.6753933149357" z="0.0"/>
  </node>
  <node id="24618" label="ENSMUSG00000028111" cy:nodeId="912">
    <graphics y="167.48072355150168" x="-221.29423257885173" z="0.0"/>
  </node>
  <node id="24617" label="ENSMUSG00000028088" cy:nodeId="913">
    <graphics y="-99.69932253004129" x="-408.33895227489666" z="0.0"/>
  </node>
  <node id="24616" label="ENSMUSG00000028068" cy:nodeId="914">
    <graphics y="-305.6948593342405" x="-73.77293512401775" z="0.0"/>
  </node>
  <node id="24615" label="ENSMUSG00000028039" cy:nodeId="915">
    <graphics y="116.06334989427512" x="-346.66211816845134" z="0.0"/>
  </node>
  <node id="24614" label="ENSMUSG00000028019" cy:nodeId="916">
    <graphics y="-390.26605684400613" x="-365.57695886669353" z="0.0"/>
  </node>
  <node id="24613" label="ENSMUSG00000028008" cy:nodeId="917">
    <graphics y="50.33537595628684" x="-507.31682703075603" z="0.0"/>
  </node>
  <node id="24612" label="ENSMUSG00000027876" cy:nodeId="918">
    <graphics y="-348.64426118970925" x="88.22716405811116" z="0.0"/>
  </node>
  <node id="24611" label="ENSMUSG00000027801" cy:nodeId="919">
    <graphics y="-277.2404831135374" x="-282.12545129833416" z="0.0"/>
  </node>
  <node id="24610" label="ENSMUSG00000027797" cy:nodeId="920">
    <graphics y="-352.68881685377175" x="179.40650060596272" z="0.0"/>
  </node>
  <node id="24609" label="ENSMUSG00000027748" cy:nodeId="921">
    <graphics y="117.11643522142356" x="-253.94153711376384" z="0.0"/>
  </node>
  <node id="24608" label="ENSMUSG00000027684" cy:nodeId="922">
    <graphics y="-97.0742538654905" x="447.34332921924397" z="0.0"/>
  </node>
  <node id="24607" label="ENSMUSG00000027674" cy:nodeId="923">
    <graphics y="85.50123136400168" x="282.5406558794002" z="0.0"/>
  </node>
  <node id="24606" label="ENSMUSG00000027635" cy:nodeId="924">
    <graphics y="-247.49927217603738" x="-212.92286035595134" z="0.0"/>
  </node>
  <node id="24605" label="ENSMUSG00000027612" cy:nodeId="925">
    <graphics y="273.05083768724387" x="-257.3596126752873" z="0.0"/>
  </node>
  <node id="24604" label="ENSMUSG00000027581" cy:nodeId="926">
    <graphics y="-255.73534090162332" x="-415.02166101513103" z="0.0"/>
  </node>
  <node id="24603" label="ENSMUSG00000027379" cy:nodeId="927">
    <graphics y="227.72568815111106" x="-329.48772546825603" z="0.0"/>
  </node>
  <node id="24602" label="ENSMUSG00000027360" cy:nodeId="928">
    <graphics y="214.3881027018923" x="-190.7374393659611" z="0.0"/>
  </node>
  <node id="24601" label="ENSMUSG00000027203" cy:nodeId="929">
    <graphics y="-265.65915376783425" x="60.450232295415844" z="0.0"/>
  </node>
  <node id="24600" label="ENSMUSG00000027074" cy:nodeId="930">
    <graphics y="211.05793302415793" x="172.22492101611897" z="0.0"/>
  </node>
  <node id="24599" label="ENSMUSG00000026828" cy:nodeId="931">
    <graphics y="-478.54181367994363" x="-89.9796611982365" z="0.0"/>
  </node>
  <node id="24598" label="ENSMUSG00000026782" cy:nodeId="932">
    <graphics y="-111.99116975904519" x="-71.88284418163494" z="0.0"/>
  </node>
  <node id="24597" label="ENSMUSG00000026765" cy:nodeId="933">
    <graphics y="-30.045321294079372" x="256.88040807666584" z="0.0"/>
  </node>
  <node id="24596" label="ENSMUSG00000026737" cy:nodeId="934">
    <graphics y="-166.54002840162332" x="445.12921789111897" z="0.0"/>
  </node>
  <node id="24595" label="ENSMUSG00000026726" cy:nodeId="935">
    <graphics y="95.7091934001345" x="261.1055972856502" z="0.0"/>
  </node>
  <node id="24594" label="ENSMUSG00000026686" cy:nodeId="936">
    <graphics y="206.40473478197043" x="-280.4201595502873" z="0.0"/>
  </node>
  <node id="24593" label="ENSMUSG00000026620" cy:nodeId="937">
    <graphics y="-34.10720808149392" x="225.46442296924397" z="0.0"/>
  </node>
  <node id="24592" label="ENSMUSG00000026610" cy:nodeId="938">
    <graphics y="260.35735624193137" x="52.926245479009594" z="0.0"/>
  </node>
  <node id="24591" label="ENSMUSG00000026520" cy:nodeId="939">
    <graphics y="266.0641738688845" x="-47.98777887401775" z="0.0"/>
  </node>
  <node id="24590" label="ENSMUSG00000026483" cy:nodeId="940">
    <graphics y="-118.971836873303" x="-42.55173608837322" z="0.0"/>
  </node>
  <node id="24589" label="ENSMUSG00000026482" cy:nodeId="941">
    <graphics y="-469.14520723463113" x="163.68204381885334" z="0.0"/>
  </node>
  <node id="24588" label="ENSMUSG00000026475" cy:nodeId="942">
    <graphics y="-145.97227937818582" x="-263.30938074169353" z="0.0"/>
  </node>
  <node id="24587" label="ENSMUSG00000026442" cy:nodeId="943">
    <graphics y="-159.94557649732644" x="-271.3978435712834" z="0.0"/>
  </node>
  <node id="24586" label="ENSMUSG00000026347" cy:nodeId="944">
    <graphics y="81.40356748460715" x="-303.6731655317326" z="0.0"/>
  </node>
  <node id="24585" label="ENSMUSG00000026322" cy:nodeId="945">
    <graphics y="144.60694425462668" x="258.75141027393147" z="0.0"/>
  </node>
  <node id="24584" label="ENSMUSG00000026321" cy:nodeId="946">
    <graphics y="-96.93026430250222" x="-289.35494348583416" z="0.0"/>
  </node>
  <node id="24583" label="ENSMUSG00000026303" cy:nodeId="947">
    <graphics y="-264.60467989088113" x="-104.45724603710369" z="0.0"/>
  </node>
  <node id="24582" label="ENSMUSG00000026288" cy:nodeId="948">
    <graphics y="75.35484617113059" x="461.9893863481502" z="0.0"/>
  </node>
  <node id="24581" label="ENSMUSG00000026255" cy:nodeId="949">
    <graphics y="99.56465452073996" x="-197.02680704174236" z="0.0"/>
  </node>
  <node id="24580" label="ENSMUSG00000026163" cy:nodeId="950">
    <graphics y="44.86596982835715" x="382.16034582080647" z="0.0"/>
  </node>
  <node id="24579" label="ENSMUSG00000026131" cy:nodeId="951">
    <graphics y="-30.179545232067653" x="360.10175207080647" z="0.0"/>
  </node>
  <node id="24578" label="ENSMUSG00000025991" cy:nodeId="952">
    <graphics y="-274.44524080396707" x="-152.61403486309246" z="0.0"/>
  </node>
  <node id="24577" label="ENSMUSG00000025867" cy:nodeId="953">
    <graphics y="126.07325284837668" x="6.489050654790844" z="0.0"/>
  </node>
  <node id="24576" label="ENSMUSG00000025739" cy:nodeId="954">
    <graphics y="60.58214109300559" x="-309.0086147504826" z="0.0"/>
  </node>
  <node id="24575" label="ENSMUSG00000025701" cy:nodeId="955">
    <graphics y="-22.048682042370388" x="-503.7474605756779" z="0.0"/>
  </node>
  <node id="24574" label="ENSMUSG00000025658" cy:nodeId="956">
    <graphics y="-112.95880586744363" x="400.6206119340877" z="0.0"/>
  </node>
  <node id="24573" label="ENSMUSG00000025608" cy:nodeId="957">
    <graphics y="62.12584989427512" x="24.637686519048657" z="0.0"/>
  </node>
  <node id="24572" label="ENSMUSG00000025602" cy:nodeId="958">
    <graphics y="-163.38422090650613" x="-153.5875270086308" z="0.0"/>
  </node>
  <node id="24571" label="ENSMUSG00000025582" cy:nodeId="959">
    <graphics y="208.08130948900168" x="401.92658117236897" z="0.0"/>
  </node>
  <node id="24570" label="ENSMUSG00000025515" cy:nodeId="960">
    <graphics y="-255.99248201490457" x="239.5901859086971" z="0.0"/>
  </node>
  <node id="24569" label="ENSMUSG00000025479" cy:nodeId="961">
    <graphics y="100.88495939134543" x="-80.73426172313884" z="0.0"/>
  </node>
  <node id="24568" label="ENSMUSG00000025432" cy:nodeId="962">
    <graphics y="478.9007522380251" x="-76.64635583934978" z="0.0"/>
  </node>
  <node id="24567" label="ENSMUSG00000025405" cy:nodeId="963">
    <graphics y="241.33825223802512" x="70.55057409229084" z="0.0"/>
  </node>
  <node id="24566" label="ENSMUSG00000025395" cy:nodeId="964">
    <graphics y="-369.260899373303" x="303.04056432666584" z="0.0"/>
  </node>
  <node id="24565" label="ENSMUSG00000025347" cy:nodeId="965">
    <graphics y="161.093104532947" x="21.54236486377522" z="0.0"/>
  </node>
  <node id="24564" label="ENSMUSG00000025329" cy:nodeId="966">
    <graphics y="213.81037443040793" x="162.01044347705647" z="0.0"/>
  </node>
  <node id="24563" label="ENSMUSG00000025268" cy:nodeId="967">
    <graphics y="-184.99506075025613" x="-346.35978052196697" z="0.0"/>
  </node>
  <node id="24562" label="ENSMUSG00000025265" cy:nodeId="968">
    <graphics y="94.46270292161887" x="-339.86458704052166" z="0.0"/>
  </node>
  <node id="24561" label="ENSMUSG00000025175" cy:nodeId="969">
    <graphics y="-155.63490755201394" x="203.46552160205647" z="0.0"/>
  </node>
  <node id="24560" label="ENSMUSG00000025089" cy:nodeId="970">
    <graphics y="-175.96237642408425" x="126.52582433643147" z="0.0"/>
  </node>
  <node id="24559" label="ENSMUSG00000025085" cy:nodeId="971">
    <graphics y="56.37279813646262" x="211.31436803760334" z="0.0"/>
  </node>
  <node id="24558" label="ENSMUSG00000025075" cy:nodeId="972">
    <graphics y="160.78205411790793" x="-178.54672739086345" z="0.0"/>
  </node>
  <node id="24557" label="ENSMUSG00000025026" cy:nodeId="973">
    <graphics y="-175.94565279127175" x="-253.35791894970134" z="0.0"/>
  </node>
  <node id="24556" label="ENSMUSG00000025020" cy:nodeId="974">
    <graphics y="590.7018081462282" x="-77.83912775097087" z="0.0"/>
  </node>
  <node id="24555" label="ENSMUSG00000025002" cy:nodeId="975">
    <graphics y="-129.74096376539285" x="-210.30881616649822" z="0.0"/>
  </node>
  <node id="24554" label="ENSMUSG00000024972" cy:nodeId="976">
    <graphics y="142.59186857103293" x="-386.9394466596623" z="0.0"/>
  </node>
  <node id="24553" label="ENSMUSG00000024912" cy:nodeId="977">
    <graphics y="2.4629623210329328" x="-19.70287439403728" z="0.0"/>
  </node>
  <node id="24552" label="ENSMUSG00000024905" cy:nodeId="978">
    <graphics y="-170.77783662916238" x="154.26416662158772" z="0.0"/>
  </node>
  <node id="24551" label="ENSMUSG00000024873" cy:nodeId="979">
    <graphics y="293.6247512614626" x="316.9736392778377" z="0.0"/>
  </node>
  <node id="24550" label="ENSMUSG00000024553" cy:nodeId="980">
    <graphics y="357.16753690599387" x="-201.98154565868572" z="0.0"/>
  </node>
  <node id="24549" label="ENSMUSG00000024548" cy:nodeId="981">
    <graphics y="14.247599772204808" x="111.13898351611897" z="0.0"/>
  </node>
  <node id="24548" label="ENSMUSG00000024512" cy:nodeId="982">
    <graphics y="294.6230117595095" x="49.63860204639241" z="0.0"/>
  </node>
  <node id="24547" label="ENSMUSG00000024511" cy:nodeId="983">
    <graphics y="-52.86692888380105" x="306.92377355518147" z="0.0"/>
  </node>
  <node id="24546" label="ENSMUSG00000024501" cy:nodeId="984">
    <graphics y="-196.62566072584207" x="-224.11255762157634" z="0.0"/>
  </node>
  <node id="24545" label="ENSMUSG00000024411" cy:nodeId="985">
    <graphics y="328.458583048572" x="165.8534915727596" z="0.0"/>
  </node>
  <node id="24544" label="ENSMUSG00000024386" cy:nodeId="986">
    <graphics y="-379.81003267408425" x="-301.09378931102947" z="0.0"/>
  </node>
  <node id="24543" label="ENSMUSG00000024352" cy:nodeId="987">
    <graphics y="-98.82017213941629" x="-292.89376184520916" z="0.0"/>
  </node>
  <node id="24542" label="ENSMUSG00000024304" cy:nodeId="988">
    <graphics y="207.68506925462668" x="-341.8904812055607" z="0.0"/>
  </node>
  <node id="24541" label="ENSMUSG00000024302" cy:nodeId="989">
    <graphics y="215.81899564622825" x="147.57498815479084" z="0.0"/>
  </node>
  <node id="24540" label="ENSMUSG00000024225" cy:nodeId="990">
    <graphics y="13.785391978015355" x="-456.22441980419353" z="0.0"/>
  </node>
  <node id="24539" label="ENSMUSG00000024215" cy:nodeId="991">
    <graphics y="278.74257963060325" x="-291.6871273237248" z="0.0"/>
  </node>
  <node id="24538" label="ENSMUSG00000024177" cy:nodeId="992">
    <graphics y="-447.64450533033425" x="329.7749088090877" z="0.0"/>
  </node>
  <node id="24537" label="ENSMUSG00000024112" cy:nodeId="993">
    <graphics y="-80.2820518696409" x="209.7111575883846" z="0.0"/>
  </node>
  <node id="24536" label="ENSMUSG00000024074" cy:nodeId="994">
    <graphics y="-162.59206087232644" x="-3.9561702924747806" z="0.0"/>
  </node>
  <node id="24535" label="ENSMUSG00000024029" cy:nodeId="995">
    <graphics y="-266.0453994953733" x="2.830710200689282" z="0.0"/>
  </node>
  <node id="24534" label="ENSMUSG00000024028" cy:nodeId="996">
    <graphics y="-75.28253252149636" x="156.34113195361897" z="0.0"/>
  </node>
  <node id="24533" label="ENSMUSG00000023966" cy:nodeId="997">
    <graphics y="365.5446426188845" x="117.44995763721272" z="0.0"/>
  </node>
  <node id="24532" label="ENSMUSG00000023963" cy:nodeId="998">
    <graphics y="-310.918858357678" x="-357.2410671430607" z="0.0"/>
  </node>
  <node id="24531" label="ENSMUSG00000023886" cy:nodeId="999">
    <graphics y="297.74343412279075" x="197.81168249072834" z="0.0"/>
  </node>
  <node id="24530" label="ENSMUSG00000023387" cy:nodeId="1000">
    <graphics y="-408.94904024244363" x="-159.9809777456303" z="0.0"/>
  </node>
  <node id="24529" label="ENSMUSG00000023247" cy:nodeId="1001">
    <graphics y="-225.82579500318582" x="89.33438756885334" z="0.0"/>
  </node>
  <node id="24528" label="ENSMUSG00000023191" cy:nodeId="1002">
    <graphics y="291.647059611072" x="195.25907018604084" z="0.0"/>
  </node>
  <node id="24527" label="ENSMUSG00000023066" cy:nodeId="1003">
    <graphics y="245.73171537279075" x="-199.84783289013103" z="0.0"/>
  </node>
  <node id="24526" label="ENSMUSG00000022978" cy:nodeId="1004">
    <graphics y="-520.3949630940061" x="-207.48572656688884" z="0.0"/>
  </node>
  <node id="24525" label="ENSMUSG00000022941" cy:nodeId="1005">
    <graphics y="-83.565831013928" x="-6.373238773920093" z="0.0"/>
  </node>
  <node id="24524" label="ENSMUSG00000022844" cy:nodeId="1006">
    <graphics y="-310.4241073811155" x="-58.52298852977947" z="0.0"/>
  </node>
  <node id="24523" label="ENSMUSG00000022829" cy:nodeId="1007">
    <graphics y="-313.48471529127175" x="-259.30733606395916" z="0.0"/>
  </node>
  <node id="24522" label="ENSMUSG00000022773" cy:nodeId="1008">
    <graphics y="584.9928848063845" x="-89.85127374706462" z="0.0"/>
  </node>
  <node id="24521" label="ENSMUSG00000022696" cy:nodeId="1009">
    <graphics y="68.47214048265403" x="-339.50811121044353" z="0.0"/>
  </node>
  <node id="24520" label="ENSMUSG00000022598" cy:nodeId="1010">
    <graphics y="113.88169401048606" x="-447.32708093700603" z="0.0"/>
  </node>
  <node id="24519" label="ENSMUSG00000022537" cy:nodeId="1011">
    <graphics y="92.33155362962668" x="-54.0033428388615" z="0.0"/>
  </node>
  <node id="24518" label="ENSMUSG00000022512" cy:nodeId="1012">
    <graphics y="209.81322782396262" x="322.7654788774471" z="0.0"/>
  </node>
  <node id="24517" label="ENSMUSG00000022505" cy:nodeId="1013">
    <graphics y="189.43525236009543" x="17.52081945361897" z="0.0"/>
  </node>
  <node id="24516" label="ENSMUSG00000022456" cy:nodeId="1014">
    <graphics y="80.57046811937278" x="34.10254552783772" z="0.0"/>
  </node>
  <node id="24515" label="ENSMUSG00000022332" cy:nodeId="1015">
    <graphics y="-127.58224184156472" x="-77.00083276806072" z="0.0"/>
  </node>
  <node id="24514" label="ENSMUSG00000022211" cy:nodeId="1016">
    <graphics y="28.318644694079808" x="-277.5139324384709" z="0.0"/>
  </node>
  <node id="24513" label="ENSMUSG00000022034" cy:nodeId="1017">
    <graphics y="-259.3760574543577" x="-284.85474512157634" z="0.0"/>
  </node>
  <node id="24512" label="ENSMUSG00000022033" cy:nodeId="1018">
    <graphics y="48.109149149646214" x="-207.03379938183025" z="0.0"/>
  </node>
  <node id="24511" label="ENSMUSG00000022026" cy:nodeId="1019">
    <graphics y="-121.62366182447488" x="26.117834834478344" z="0.0"/>
  </node>
  <node id="24510" label="ENSMUSG00000021986" cy:nodeId="1020">
    <graphics y="-12.688164540539333" x="363.3562076372127" z="0.0"/>
  </node>
  <node id="24509" label="ENSMUSG00000021904" cy:nodeId="1021">
    <graphics y="-52.11341936231668" x="-636.7431270795842" z="0.0"/>
  </node>
  <node id="24508" label="ENSMUSG00000021838" cy:nodeId="1022">
    <graphics y="-215.38396150709207" x="215.3080814165096" z="0.0"/>
  </node>
  <node id="24507" label="ENSMUSG00000021730" cy:nodeId="1023">
    <graphics y="-80.73407442213113" x="-32.28370019970134" z="0.0"/>
  </node>
  <node id="24506" label="ENSMUSG00000021700" cy:nodeId="1024">
    <graphics y="158.73058622240012" x="142.36035802783772" z="0.0"/>
  </node>
  <node id="24505" label="ENSMUSG00000021684" cy:nodeId="1025">
    <graphics y="-32.576472111950466" x="266.75641515674397" z="0.0"/>
  </node>
  <node id="24504" label="ENSMUSG00000021604" cy:nodeId="1026">
    <graphics y="-66.69614488721902" x="-49.145348759271656" z="0.0"/>
  </node>
  <node id="24503" label="ENSMUSG00000021572" cy:nodeId="1027">
    <graphics y="152.02607267259543" x="27.513663081548657" z="0.0"/>
  </node>
  <node id="24502" label="ENSMUSG00000021539" cy:nodeId="1028">
    <graphics y="-67.2448089802366" x="-119.89463159618572" z="0.0"/>
  </node>
  <node id="24501" label="ENSMUSG00000021509" cy:nodeId="1029">
    <graphics y="-13.107730695019313" x="127.36041906299397" z="0.0"/>
  </node>
  <node id="24500" label="ENSMUSG00000021403" cy:nodeId="1030">
    <graphics y="34.56206052659934" x="-109.6881344038029" z="0.0"/>
  </node>
  <node id="24499" label="ENSMUSG00000021364" cy:nodeId="1031">
    <graphics y="-30.7067230427366" x="242.77411535205647" z="0.0"/>
  </node>
  <node id="24498" label="ENSMUSG00000021265" cy:nodeId="1032">
    <graphics y="-422.6584518635374" x="267.71198156299397" z="0.0"/>
  </node>
  <node id="24497" label="ENSMUSG00000021175" cy:nodeId="1033">
    <graphics y="-311.7519882404905" x="58.76061132373616" z="0.0"/>
  </node>
  <node id="24496" label="ENSMUSG00000021136" cy:nodeId="1034">
    <graphics y="-178.72473604322488" x="144.14319494190022" z="0.0"/>
  </node>
  <node id="24495" label="ENSMUSG00000021013" cy:nodeId="1035">
    <graphics y="-24.839642354260036" x="103.11551549854084" z="0.0"/>
  </node>
  <node id="24494" label="ENSMUSG00000020953" cy:nodeId="1036">
    <graphics y="194.24053495286887" x="92.68758275928303" z="0.0"/>
  </node>
  <node id="24493" label="ENSMUSG00000020900" cy:nodeId="1037">
    <graphics y="34.06251066087668" x="-308.8685238080998" z="0.0"/>
  </node>
  <node id="24492" label="ENSMUSG00000020886" cy:nodeId="1038">
    <graphics y="-291.4565780842405" x="-159.07109376964763" z="0.0"/>
  </node>
  <node id="24491" label="ENSMUSG00000020732" cy:nodeId="1039">
    <graphics y="237.72112577318137" x="-233.88321802196697" z="0.0"/>
  </node>
  <node id="24490" label="ENSMUSG00000020717" cy:nodeId="1040">
    <graphics y="385.4672805583376" x="-58.25076410350994" z="0.0"/>
  </node>
  <node id="24489" label="ENSMUSG00000020684" cy:nodeId="1041">
    <graphics y="238.60540311693137" x="85.0711429399471" z="0.0"/>
  </node>
  <node id="24488" label="ENSMUSG00000020682" cy:nodeId="1042">
    <graphics y="288.6160842692751" x="-230.88089868602947" z="0.0"/>
  </node>
  <node id="24487" label="ENSMUSG00000020635" cy:nodeId="1043">
    <graphics y="207.16839139818137" x="-206.40256616649822" z="0.0"/>
  </node>
  <node id="24486" label="ENSMUSG00000020576" cy:nodeId="1044">
    <graphics y="248.952723673572" x="189.7607181352596" z="0.0"/>
  </node>
  <node id="24485" label="ENSMUSG00000020571" cy:nodeId="1045">
    <graphics y="-99.22661287427957" x="258.6364810747127" z="0.0"/>
  </node>
  <node id="24484" label="ENSMUSG00000020469" cy:nodeId="1046">
    <graphics y="-120.43721468092019" x="-462.6442806440373" z="0.0"/>
  </node>
  <node id="24483" label="ENSMUSG00000020462" cy:nodeId="1047">
    <graphics y="-119.18152315259988" x="-219.11273309765056" z="0.0"/>
  </node>
  <node id="24482" label="ENSMUSG00000020431" cy:nodeId="1048">
    <graphics y="-211.61073763013894" x="117.85755041065022" z="0.0"/>
  </node>
  <node id="24481" label="ENSMUSG00000020405" cy:nodeId="1049">
    <graphics y="249.42406766771262" x="-19.243600102045093" z="0.0"/>
  </node>
  <node id="24480" label="ENSMUSG00000020381" cy:nodeId="1050">
    <graphics y="67.1066314494509" x="-668.8548214155217" z="0.0"/>
  </node>
  <node id="24479" label="ENSMUSG00000020333" cy:nodeId="1051">
    <graphics y="197.92895048021262" x="188.69098546924397" z="0.0"/>
  </node>
  <node id="24478" label="ENSMUSG00000020256" cy:nodeId="1052">
    <graphics y="146.42400663255637" x="430.65924718799397" z="0.0"/>
  </node>
  <node id="24477" label="ENSMUSG00000020178" cy:nodeId="1053">
    <graphics y="189.65868680833762" x="49.56873205127522" z="0.0"/>
  </node>
  <node id="24476" label="ENSMUSG00000020176" cy:nodeId="1054">
    <graphics y="-48.98782426954324" x="197.28174474658772" z="0.0"/>
  </node>
  <node id="24475" label="ENSMUSG00000020175" cy:nodeId="1055">
    <graphics y="-29.149843999157497" x="569.8737857622127" z="0.0"/>
  </node>
  <node id="24474" label="ENSMUSG00000020151" cy:nodeId="1056">
    <graphics y="-25.009846516857692" x="-287.08353540477947" z="0.0"/>
  </node>
  <node id="24473" label="ENSMUSG00000020140" cy:nodeId="1057">
    <graphics y="-86.58026582838113" x="-380.67122766552166" z="0.0"/>
  </node>
  <node id="24472" label="ENSMUSG00000020086" cy:nodeId="1058">
    <graphics y="-399.1482284748655" x="-70.93921014843181" z="0.0"/>
  </node>
  <node id="24471" label="ENSMUSG00000020044" cy:nodeId="1059">
    <graphics y="166.83343046068137" x="402.9541080278377" z="0.0"/>
  </node>
  <node id="24470" label="ENSMUSG00000020019" cy:nodeId="1060">
    <graphics y="174.70074003099387" x="-87.07251855907634" z="0.0"/>
  </node>
  <node id="24469" label="ENSMUSG00000019992" cy:nodeId="1061">
    <graphics y="59.68027799486106" x="-249.82428094921306" z="0.0"/>
  </node>
  <node id="24468" label="ENSMUSG00000019989" cy:nodeId="1062">
    <graphics y="-361.84335786939675" x="-196.2633297163029" z="0.0"/>
  </node>
  <node id="24467" label="ENSMUSG00000019945" cy:nodeId="1063">
    <graphics y="7.115050486316136" x="32.540564326665844" z="0.0"/>
  </node>
  <node id="24466" label="ENSMUSG00000019944" cy:nodeId="1064">
    <graphics y="90.39305417894309" x="44.463537959478344" z="0.0"/>
  </node>
  <node id="24465" label="ENSMUSG00000019906" cy:nodeId="1065">
    <graphics y="420.4815627849001" x="-151.47387334881023" z="0.0"/>
  </node>
  <node id="24464" label="ENSMUSG00000019890" cy:nodeId="1066">
    <graphics y="51.27683561204856" x="119.06616857471272" z="0.0"/>
  </node>
  <node id="24463" label="ENSMUSG00000019876" cy:nodeId="1067">
    <graphics y="407.3325149333376" x="61.21820714893147" z="0.0"/>
  </node>
  <node id="24462" label="ENSMUSG00000019775" cy:nodeId="1068">
    <graphics y="108.77508085130637" x="-246.37835046825603" z="0.0"/>
  </node>
  <node id="24461" label="ENSMUSG00000019235" cy:nodeId="1069">
    <graphics y="327.03969877122825" x="-306.67403528270916" z="0.0"/>
  </node>
  <node id="24460" label="ENSMUSG00000019122" cy:nodeId="1070">
    <graphics y="455.36977689622825" x="-363.24125024852947" z="0.0"/>
  </node>
  <node id="24459" label="ENSMUSG00000018865" cy:nodeId="1071">
    <graphics y="271.3525039470095" x="336.75897863330647" z="0.0"/>
  </node>
  <node id="24458" label="ENSMUSG00000018672" cy:nodeId="1072">
    <graphics y="104.82150571702903" x="-135.7733165937443" z="0.0"/>
  </node>
  <node id="24457" label="ENSMUSG00000018620" cy:nodeId="1073">
    <graphics y="-80.12292940259988" x="-334.25318262157634" z="0.0"/>
  </node>
  <node id="24456" label="ENSMUSG00000018554" cy:nodeId="1074">
    <graphics y="-243.19806367994363" x="-33.773766728021656" z="0.0"/>
  </node>
  <node id="24455" label="ENSMUSG00000018486" cy:nodeId="1075">
    <graphics y="44.74216764329856" x="-203.6613018232365" z="0.0"/>
  </node>
  <node id="24454" label="ENSMUSG00000018470" cy:nodeId="1076">
    <graphics y="-124.39918977857644" x="236.32770421924397" z="0.0"/>
  </node>
  <node id="24453" label="ENSMUSG00000018339" cy:nodeId="1077">
    <graphics y="365.70794217943137" x="-60.82406732616619" z="0.0"/>
  </node>
  <node id="24452" label="ENSMUSG00000017943" cy:nodeId="1078">
    <graphics y="-47.01172144056375" x="-319.5225307661076" z="0.0"/>
  </node>
  <node id="24451" label="ENSMUSG00000017692" cy:nodeId="1079">
    <graphics y="-6.129533597240993" x="38.413122920415844" z="0.0"/>
  </node>
  <node id="24450" label="ENSMUSG00000017639" cy:nodeId="1080">
    <graphics y="41.58267515062278" x="-166.32510110912517" z="0.0"/>
  </node>
  <node id="24449" label="ENSMUSG00000017607" cy:nodeId="1081">
    <graphics y="-138.69345552564675" x="153.45538976611897" z="0.0"/>
  </node>
  <node id="24448" label="ENSMUSG00000017211" cy:nodeId="1082">
    <graphics y="-485.22443086744363" x="84.19122960986897" z="0.0"/>
  </node>
  <node id="24447" label="ENSMUSG00000017204" cy:nodeId="1083">
    <graphics y="-62.67525179029519" x="-139.97780534801677" z="0.0"/>
  </node>
  <node id="24446" label="ENSMUSG00000016763" cy:nodeId="1084">
    <graphics y="-250.01886446119363" x="-15.584298344232593" z="0.0"/>
  </node>
  <node id="24445" label="ENSMUSG00000015568" cy:nodeId="1085">
    <graphics y="223.25385587572043" x="55.88497045459553" z="0.0"/>
  </node>
  <node id="24444" label="ENSMUSG00000015222" cy:nodeId="1086">
    <graphics y="-36.40810472608621" x="277.4486148637752" z="0.0"/>
  </node>
  <node id="24443" label="ENSMUSG00000014602" cy:nodeId="1087">
    <graphics y="386.732020548572" x="32.83655431690022" z="0.0"/>
  </node>
  <node id="24442" label="ENSMUSG00000013921" cy:nodeId="1088">
    <graphics y="27.072241953601292" x="166.59500768604084" z="0.0"/>
  </node>
  <node id="24441" label="ENSMUSG00000011256" cy:nodeId="1089">
    <graphics y="133.46750944017356" x="11.131491450689282" z="0.0"/>
  </node>
  <node id="24440" label="ENSMUSG00000010803" cy:nodeId="1090">
    <graphics y="268.097499064197" x="309.2588870805721" z="0.0"/>
  </node>
  <node id="24439" label="ENSMUSG00000010307" cy:nodeId="1091">
    <graphics y="314.37343900560325" x="278.4895084184627" z="0.0"/>
  </node>
  <node id="24438" label="ENSMUSG00000010066" cy:nodeId="1092">
    <graphics y="335.036219767322" x="-162.19818231640056" z="0.0"/>
  </node>
  <node id="24437" label="ENSMUSG00000009731" cy:nodeId="1093">
    <graphics y="50.31589048265403" x="-216.98887750683025" z="0.0"/>
  </node>
  <node id="24436" label="ENSMUSG00000009378" cy:nodeId="1094">
    <graphics y="57.6399566447634" x="282.81159093799397" z="0.0"/>
  </node>
  <node id="24435" label="ENSMUSG00000008734" cy:nodeId="1095">
    <graphics y="325.30459134935325" x="-25.11986658153728" z="0.0"/>
  </node>
  <node id="24434" label="ENSMUSG00000008461" cy:nodeId="1096">
    <graphics y="196.76110380052512" x="-30.861092777826343" z="0.0"/>
  </node>
  <node id="24433" label="ENSMUSG00000007783" cy:nodeId="1097">
    <graphics y="-152.9951980793577" x="-481.81853601513103" z="0.0"/>
  </node>
  <node id="24432" label="ENSMUSG00000007379" cy:nodeId="1098">
    <graphics y="281.14446561693137" x="251.27124669971272" z="0.0"/>
  </node>
  <node id="24431" label="ENSMUSG00000007080" cy:nodeId="1099">
    <graphics y="606.400233439197" x="-111.59960672435955" z="0.0"/>
  </node>
  <node id="24430" label="ENSMUSG00000006675" cy:nodeId="1100">
    <graphics y="-344.0383651936155" x="20.12445714893147" z="0.0"/>
  </node>
  <node id="24429" label="ENSMUSG00000006651" cy:nodeId="1101">
    <graphics y="41.22289579271262" x="-471.88286706981853" z="0.0"/>
  </node>
  <node id="24428" label="ENSMUSG00000006386" cy:nodeId="1102">
    <graphics y="6.269826105822972" x="352.0546939653377" z="0.0"/>
  </node>
  <node id="24427" label="ENSMUSG00000006342" cy:nodeId="1103">
    <graphics y="324.94729154466575" x="-112.09620401439861" z="0.0"/>
  </node>
  <node id="24426" label="ENSMUSG00000005470" cy:nodeId="1104">
    <graphics y="-324.99078828931863" x="-64.33422205028728" z="0.0"/>
  </node>
  <node id="24425" label="ENSMUSG00000004654" cy:nodeId="1105">
    <graphics y="-552.9556625568968" x="200.35755041065022" z="0.0"/>
  </node>
  <node id="24424" label="ENSMUSG00000004347" cy:nodeId="1106">
    <graphics y="31.105826548327855" x="-113.20554468212322" z="0.0"/>
  </node>
  <node id="24423" label="ENSMUSG00000004038" cy:nodeId="1107">
    <graphics y="-85.03364259840066" x="-28.611092777826343" z="0.0"/>
  </node>
  <node id="24422" label="ENSMUSG00000003418" cy:nodeId="1108">
    <graphics y="-367.32367403150613" x="-52.83094141063884" z="0.0"/>
  </node>
  <node id="24421" label="ENSMUSG00000003411" cy:nodeId="1109">
    <graphics y="-63.89846498609597" x="-357.9243404584904" z="0.0"/>
  </node>
  <node id="24420" label="ENSMUSG00000003355" cy:nodeId="1110">
    <graphics y="-224.29806978345925" x="-79.65211603222087" z="0.0"/>
  </node>
  <node id="24419" label="ENSMUSG00000002504" cy:nodeId="1111">
    <graphics y="-409.4668319904905" x="90.8519046586971" z="0.0"/>
  </node>
  <node id="24418" label="ENSMUSG00000002341" cy:nodeId="1112">
    <graphics y="450.9977676188845" x="320.3066470903377" z="0.0"/>
  </node>
  <node id="24417" label="ENSMUSG00000002233" cy:nodeId="1113">
    <graphics y="359.5902969157595" x="-246.54432794628337" z="0.0"/>
  </node>
  <node id="24416" label="ENSMUSG00000002107" cy:nodeId="1114">
    <graphics y="187.49311368822043" x="200.76337316455647" z="0.0"/>
  </node>
  <node id="24415" label="ENSMUSG00000002006" cy:nodeId="1115">
    <graphics y="-400.51157076002175" x="-400.8124935346623" z="0.0"/>
  </node>
  <node id="24414" label="ENSMUSG00000001901" cy:nodeId="1116">
    <graphics y="331.754725626697" x="-132.82159921703533" z="0.0"/>
  </node>
  <node id="24413" label="ENSMUSG00000001802" cy:nodeId="1117">
    <graphics y="390.315028361072" x="174.3947513383846" z="0.0"/>
  </node>
  <node id="24412" label="ENSMUSG00000001525" cy:nodeId="1118">
    <graphics y="-278.40158540845925" x="157.30643346729084" z="0.0"/>
  </node>
  <node id="24411" label="ENSMUSG00000001435" cy:nodeId="1119">
    <graphics y="-155.359043904553" x="211.24487951221272" z="0.0"/>
  </node>
  <node id="24410" label="ENSMUSG00000001333" cy:nodeId="1120">
    <graphics y="298.67339628099387" x="165.94632604541584" z="0.0"/>
  </node>
  <node id="24409" label="ENSMUSG00000001228" cy:nodeId="1121">
    <graphics y="67.72967069505637" x="-470.9748775678654" z="0.0"/>
  </node>
  <node id="24408" label="ENSMUSG00000000884" cy:nodeId="1122">
    <graphics y="139.04004972337668" x="97.85669591846272" z="0.0"/>
  </node>
  <node id="24407" label="ENSMUSG00000000530" cy:nodeId="1123">
    <graphics y="156.24004667161887" x="-424.24907800731853" z="0.0"/>
  </node>
  <node id="24406" label="ENSMUSG00000000416" cy:nodeId="1124">
    <graphics y="440.1239883220095" x="-41.660363407709156" z="0.0"/>
  </node>
  <node id="24405" label="ENSMUSG00000000296" cy:nodeId="1125">
    <graphics y="-447.2030075275999" x="-313.5114986616154" z="0.0"/>
  </node>
  <node id="24404" label="ENSMUSG00000000253" cy:nodeId="1126">
    <graphics y="348.24309842943137" x="-33.01989099559978" z="0.0"/>
  </node>
  <node id="24403" label="ENSMUSG00000000202" cy:nodeId="1127">
    <graphics y="384.68117826341575" x="-243.37020227489666" z="0.0"/>
  </node>
  <node id="24402" label="ENSMUSG00000000120" cy:nodeId="1128">
    <graphics y="-269.09726411939675" x="223.5600345415096" z="0.0"/>
  </node>
  <node id="24401" label="ENSMUSG00000035451" cy:nodeId="1129">
    <graphics y="32.901148966540745" x="-29.450768681146656" z="0.0"/>
  </node>
  <node id="24400" label="ENSMUSG00000021379" cy:nodeId="1130">
    <graphics y="293.7870742595095" x="464.8736636919002" z="0.0"/>
  </node>
  <node id="24399" label="ENSMUSG00000073043" cy:nodeId="1131">
    <graphics y="20.924376658191136" x="4.806677607915844" z="0.0"/>
  </node>
  <node id="24398" label="ENSMUSG00000020423" cy:nodeId="1132">
    <graphics y="-169.84079439283425" x="252.01648595752522" z="0.0"/>
  </node>
  <node id="24397" label="ENSMUSG00000093805" cy:nodeId="1133">
    <graphics y="453.4764358317751" x="-367.07560083446697" z="0.0"/>
  </node>
  <node id="24396" label="ENSMUSG00000063810" cy:nodeId="1134">
    <graphics y="-30.61455709577615" x="-418.69707605419353" z="0.0"/>
  </node>
  <node id="24395" label="ENSMUSG00000054582" cy:nodeId="1135">
    <graphics y="220.10874479173606" x="181.74259069385334" z="0.0"/>
  </node>
  <node id="24394" label="ENSMUSG00000042532" cy:nodeId="1136">
    <graphics y="-228.18756563306863" x="-289.42293664989666" z="0.0"/>
  </node>
  <node id="24393" label="ENSMUSG00000042155" cy:nodeId="1137">
    <graphics y="203.86768644212668" x="-248.156052799799" z="0.0"/>
  </node>
  <node id="24392" label="ENSMUSG00000041168" cy:nodeId="1138">
    <graphics y="-298.0009811604124" x="38.066199092290844" z="0.0"/>
  </node>
  <node id="24391" label="ENSMUSG00000040231" cy:nodeId="1139">
    <graphics y="-505.30612642408425" x="-309.4223568159123" z="0.0"/>
  </node>
  <node id="24390" label="ENSMUSG00000040046" cy:nodeId="1140">
    <graphics y="-23.554609128246852" x="147.20987585010334" z="0.0"/>
  </node>
  <node id="24389" label="ENSMUSG00000039013" cy:nodeId="1141">
    <graphics y="157.06582181810325" x="-54.370377750970874" z="0.0"/>
  </node>
  <node id="24388" label="ENSMUSG00000038146" cy:nodeId="1142">
    <graphics y="90.42113035081809" x="138.74811437549397" z="0.0"/>
  </node>
  <node id="24387" label="ENSMUSG00000034818" cy:nodeId="1143">
    <graphics y="-407.0300338947874" x="-224.79628107128337" z="0.0"/>
  </node>
  <node id="24386" label="ENSMUSG00000033029" cy:nodeId="1144">
    <graphics y="-310.4306686604124" x="-448.2835628705998" z="0.0"/>
  </node>
  <node id="24385" label="ENSMUSG00000031532" cy:nodeId="1145">
    <graphics y="85.72372739671653" x="185.19339635791584" z="0.0"/>
  </node>
  <node id="24384" label="ENSMUSG00000028693" cy:nodeId="1146">
    <graphics y="-7.913337537060329" x="56.94771459522053" z="0.0"/>
  </node>
  <node id="24383" label="ENSMUSG00000028527" cy:nodeId="1147">
    <graphics y="-181.0400741779905" x="252.74207189502522" z="0.0"/>
  </node>
  <node id="24382" label="ENSMUSG00000026272" cy:nodeId="1148">
    <graphics y="-54.8001068317991" x="-20.565530033685718" z="0.0"/>
  </node>
  <node id="24381" label="ENSMUSG00000024151" cy:nodeId="1149">
    <graphics y="-129.76086122633035" x="-295.4668209272404" z="0.0"/>
  </node>
  <node id="24380" label="ENSMUSG00000022857" cy:nodeId="1150">
    <graphics y="18.857936075915745" x="365.55329015674397" z="0.0"/>
  </node>
  <node id="24379" label="ENSMUSG00000009545" cy:nodeId="1151">
    <graphics y="202.78159635423606" x="53.70679357471272" z="0.0"/>
  </node>
  <node id="24378" label="ENSMUSG00000005672" cy:nodeId="1152">
    <graphics y="-51.700238057385036" x="70.79633214893147" z="0.0"/>
  </node>
  <node id="24377" label="ENSMUSG00000002055" cy:nodeId="1153">
    <graphics y="-151.6011551106077" x="-211.77576181469158" z="0.0"/>
  </node>
  <node id="24376" label="ENSMUSG00000000125" cy:nodeId="1154">
    <graphics y="175.81623380540793" x="-473.4326107221623" z="0.0"/>
  </node>
  <node id="24375" label="ENSMUSG00000094626" cy:nodeId="1155">
    <graphics y="-159.77997285963113" x="-174.1944534498234" z="0.0"/>
  </node>
  <node id="24374" label="ENSMUSG00000066720" cy:nodeId="1156">
    <graphics y="-399.08847505689675" x="178.55191686572834" z="0.0"/>
  </node>
  <node id="24373" label="ENSMUSG00000064272" cy:nodeId="1157">
    <graphics y="143.6911269938845" x="-182.7076770978947" z="0.0"/>
  </node>
  <node id="24372" label="ENSMUSG00000058070" cy:nodeId="1158">
    <graphics y="-129.3493011677366" x="-94.7660495954533" z="0.0"/>
  </node>
  <node id="24371" label="ENSMUSG00000055197" cy:nodeId="1159">
    <graphics y="-129.82543642164285" x="101.89270666065022" z="0.0"/>
  </node>
  <node id="24370" label="ENSMUSG00000049154" cy:nodeId="1160">
    <graphics y="-154.3923690998655" x="60.481299189947094" z="0.0"/>
  </node>
  <node id="24369" label="ENSMUSG00000047250" cy:nodeId="1161">
    <graphics y="-47.43330652357156" x="52.34357335986897" z="0.0"/>
  </node>
  <node id="24368" label="ENSMUSG00000044988" cy:nodeId="1162">
    <graphics y="-79.20460970045144" x="-297.02657434520916" z="0.0"/>
  </node>
  <node id="24367" label="ENSMUSG00000041798" cy:nodeId="1163">
    <graphics y="283.47402494310325" x="-354.28470727977947" z="0.0"/>
  </node>
  <node id="24366" label="ENSMUSG00000041141" cy:nodeId="1164">
    <graphics y="-105.20322115064675" x="-221.51793024120525" z="0.0"/>
  </node>
  <node id="24365" label="ENSMUSG00000040543" cy:nodeId="1165">
    <graphics y="-0.6581752979856219" x="67.09696081104084" z="0.0"/>
  </node>
  <node id="24364" label="ENSMUSG00000037953" cy:nodeId="1166">
    <graphics y="180.08417814134543" x="-144.8290617185612" z="0.0"/>
  </node>
  <node id="24363" label="ENSMUSG00000036915" cy:nodeId="1167">
    <graphics y="-48.3829754078489" x="-61.25452539501384" z="0.0"/>
  </node>
  <node id="24362" label="ENSMUSG00000036764" cy:nodeId="1168">
    <graphics y="-389.0203903400999" x="-437.31682703075603" z="0.0"/>
  </node>
  <node id="24361" label="ENSMUSG00000032507" cy:nodeId="1169">
    <graphics y="-282.952549763928" x="154.92133214893147" z="0.0"/>
  </node>
  <node id="24360" label="ENSMUSG00000032338" cy:nodeId="1170">
    <graphics y="-195.234776326428" x="-23.520577641107593" z="0.0"/>
  </node>
  <node id="24359" label="ENSMUSG00000031853" cy:nodeId="1171">
    <graphics y="-226.06169588209207" x="-351.57952234325603" z="0.0"/>
  </node>
  <node id="24358" label="ENSMUSG00000031790" cy:nodeId="1172">
    <graphics y="84.07401578782981" x="-145.98545953808025" z="0.0"/>
  </node>
  <node id="24357" label="ENSMUSG00000030897" cy:nodeId="1173">
    <graphics y="-17.642735310803005" x="-338.44596216259197" z="0.0"/>
  </node>
  <node id="24356" label="ENSMUSG00000029420" cy:nodeId="1174">
    <graphics y="31.802008799304417" x="266.2433841508846" z="0.0"/>
  </node>
  <node id="24355" label="ENSMUSG00000025876" cy:nodeId="1175">
    <graphics y="-170.38173372388894" x="-332.2510006147404" z="0.0"/>
  </node>
  <node id="24354" label="ENSMUSG00000024897" cy:nodeId="1176">
    <graphics y="-64.32674486280496" x="154.51978185596272" z="0.0"/>
  </node>
  <node id="24353" label="ENSMUSG00000024175" cy:nodeId="1177">
    <graphics y="253.78228299974387" x="63.11420324268147" z="0.0"/>
  </node>
  <node id="24352" label="ENSMUSG00000022018" cy:nodeId="1178">
    <graphics y="161.909999064197" x="-168.36824914989666" z="0.0"/>
  </node>
  <node id="24351" label="ENSMUSG00000021303" cy:nodeId="1179">
    <graphics y="-4.391683408032009" x="459.7597720903377" z="0.0"/>
  </node>
  <node id="24350" label="ENSMUSG00000021198" cy:nodeId="1180">
    <graphics y="-311.71310884595925" x="59.617102412603344" z="0.0"/>
  </node>
  <node id="24349" label="ENSMUSG00000019124" cy:nodeId="1181">
    <graphics y="-42.34784967542703" x="-160.9608623701115" z="0.0"/>
  </node>
  <node id="24348" label="ENSMUSG00000010825" cy:nodeId="1182">
    <graphics y="422.326991251697" x="-121.25990411815837" z="0.0"/>
  </node>
  <node id="24347" label="ENSMUSG00000019900" cy:nodeId="1183">
    <graphics y="-106.6345794880491" x="-21.025414677240406" z="0.0"/>
  </node>
  <node id="24346" label="ENSMUSG00000101605" cy:nodeId="1184">
    <graphics y="138.08115690111106" x="197.22611120166584" z="0.0"/>
  </node>
  <node id="24345" label="ENSMUSG00000090353" cy:nodeId="1185">
    <graphics y="78.69044034837668" x="341.2006900590877" z="0.0"/>
  </node>
  <node id="24344" label="ENSMUSG00000079654" cy:nodeId="1186">
    <graphics y="193.40624540208762" x="111.6976077836971" z="0.0"/>
  </node>
  <node id="24343" label="ENSMUSG00000079442" cy:nodeId="1187">
    <graphics y="103.5606109416384" x="-89.12967798290447" z="0.0"/>
  </node>
  <node id="24342" label="ENSMUSG00000078984" cy:nodeId="1188">
    <graphics y="-184.3725174152952" x="6.879172114751782" z="0.0"/>
  </node>
  <node id="24341" label="ENSMUSG00000074896" cy:nodeId="1189">
    <graphics y="298.7648879802126" x="128.79767492236897" z="0.0"/>
  </node>
  <node id="24340" label="ENSMUSG00000074345" cy:nodeId="1190">
    <graphics y="289.30559842943137" x="-129.96036455211834" z="0.0"/>
  </node>
  <node id="24339" label="ENSMUSG00000073207" cy:nodeId="1191">
    <graphics y="367.484461954822" x="187.80106237354084" z="0.0"/>
  </node>
  <node id="24338" label="ENSMUSG00000071537" cy:nodeId="1192">
    <graphics y="52.62829130052512" x="-154.31116029796794" z="0.0"/>
  </node>
  <node id="24337" label="ENSMUSG00000071203" cy:nodeId="1193">
    <graphics y="-237.36281282545144" x="-194.5954715925236" z="0.0"/>
  </node>
  <node id="24336" label="ENSMUSG00000071103" cy:nodeId="1194">
    <graphics y="-147.6294296467405" x="83.93285253467366" z="0.0"/>
  </node>
  <node id="24335" label="ENSMUSG00000069805" cy:nodeId="1195">
    <graphics y="267.45672147630637" x="81.57289770068928" z="0.0"/>
  </node>
  <node id="24334" label="ENSMUSG00000069793" cy:nodeId="1196">
    <graphics y="-116.98838503004129" x="175.33881261768147" z="0.0"/>
  </node>
  <node id="24333" label="ENSMUSG00000069515" cy:nodeId="1197">
    <graphics y="-142.4109695637327" x="135.6127689165096" z="0.0"/>
  </node>
  <node id="24332" label="ENSMUSG00000069184" cy:nodeId="1198">
    <graphics y="180.504725626697" x="257.6432864946346" z="0.0"/>
  </node>
  <node id="24331" label="ENSMUSG00000068877" cy:nodeId="1199">
    <graphics y="-109.59302980543191" x="-159.344134541132" z="0.0"/>
  </node>
  <node id="24330" label="ENSMUSG00000067297" cy:nodeId="1200">
    <graphics y="185.51150052904075" x="-416.79839441356853" z="0.0"/>
  </node>
  <node id="24329" label="ENSMUSG00000066324" cy:nodeId="1201">
    <graphics y="317.7842971599001" x="-92.23924371776775" z="0.0"/>
  </node>
  <node id="24328" label="ENSMUSG00000065952" cy:nodeId="1202">
    <graphics y="-346.72177583814675" x="-90.0260250288029" z="0.0"/>
  </node>
  <node id="24327" label="ENSMUSG00000064140" cy:nodeId="1203">
    <graphics y="90.44022672532981" x="-63.63348505077556" z="0.0"/>
  </node>
  <node id="24326" label="ENSMUSG00000062593" cy:nodeId="1204">
    <graphics y="-38.31235773206765" x="-99.81478998241619" z="0.0"/>
  </node>
  <node id="24325" label="ENSMUSG00000060548" cy:nodeId="1205">
    <graphics y="-27.621767827282497" x="-144.43573495922283" z="0.0"/>
  </node>
  <node id="24324" label="ENSMUSG00000060519" cy:nodeId="1206">
    <graphics y="170.08559720872825" x="-40.31894800243572" z="0.0"/>
  </node>
  <node id="24323" label="ENSMUSG00000060429" cy:nodeId="1207">
    <graphics y="-200.68559724927957" x="-321.03057214794353" z="0.0"/>
  </node>
  <node id="24322" label="ENSMUSG00000058672" cy:nodeId="1208">
    <graphics y="-15.221114941845485" x="138.27387121143147" z="0.0"/>
  </node>
  <node id="24321" label="ENSMUSG00000058216" cy:nodeId="1209">
    <graphics y="-242.0526931965452" x="-152.5013553815861" z="0.0"/>
  </node>
  <node id="24320" label="ENSMUSG00000056592" cy:nodeId="1210">
    <graphics y="-507.31467134595925" x="-219.86838647899822" z="0.0"/>
  </node>
  <node id="24319" label="ENSMUSG00000055976" cy:nodeId="1211">
    <graphics y="238.24199979661887" x="185.34094884815022" z="0.0"/>
  </node>
  <node id="24318" label="ENSMUSG00000054200" cy:nodeId="1212">
    <graphics y="131.76490323900168" x="79.93532445850178" z="0.0"/>
  </node>
  <node id="24317" label="ENSMUSG00000053617" cy:nodeId="1213">
    <graphics y="39.35597150682395" x="95.43201330127522" z="0.0"/>
  </node>
  <node id="24316" label="ENSMUSG00000053182" cy:nodeId="1214">
    <graphics y="8.187037638415745" x="231.80817296924397" z="0.0"/>
  </node>
  <node id="24315" label="ENSMUSG00000052631" cy:nodeId="1215">
    <graphics y="-49.37628061414773" x="-92.20286676464275" z="0.0"/>
  </node>
  <node id="24314" label="ENSMUSG00000050097" cy:nodeId="1216">
    <graphics y="-158.34985811353738" x="-233.1776363569279" z="0.0"/>
  </node>
  <node id="24313" label="ENSMUSG00000050064" cy:nodeId="1217">
    <graphics y="16.7641135966677" x="-207.438035221674" z="0.0"/>
  </node>
  <node id="24312" label="ENSMUSG00000049723" cy:nodeId="1218">
    <graphics y="-109.60628206373269" x="-148.03025934276775" z="0.0"/>
  </node>
  <node id="24311" label="ENSMUSG00000049588" cy:nodeId="1219">
    <graphics y="207.6424972331423" x="40.38739660205647" z="0.0"/>
  </node>
  <node id="24310" label="ENSMUSG00000049436" cy:nodeId="1220">
    <graphics y="240.77587430833762" x="-400.2482845502873" z="0.0"/>
  </node>
  <node id="24309" label="ENSMUSG00000049313" cy:nodeId="1221">
    <graphics y="-270.7200515949827" x="60.734350947759594" z="0.0"/>
  </node>
  <node id="24308" label="ENSMUSG00000049281" cy:nodeId="1222">
    <graphics y="283.9964553630251" x="71.42017248096272" z="0.0"/>
  </node>
  <node id="24307" label="ENSMUSG00000048752" cy:nodeId="1223">
    <graphics y="-382.0566452229124" x="-253.72899744091228" z="0.0"/>
  </node>
  <node id="24306" label="ENSMUSG00000048612" cy:nodeId="1224">
    <graphics y="-323.04230196119363" x="207.68268468799397" z="0.0"/>
  </node>
  <node id="24305" label="ENSMUSG00000048373" cy:nodeId="1225">
    <graphics y="-208.02100069166238" x="147.99848058643147" z="0.0"/>
  </node>
  <node id="24304" label="ENSMUSG00000048329" cy:nodeId="1226">
    <graphics y="39.68674390672629" x="59.47174718799397" z="0.0"/>
  </node>
  <node id="24303" label="ENSMUSG00000048216" cy:nodeId="1227">
    <graphics y="438.44964139818137" x="-263.28251001415447" z="0.0"/>
  </node>
  <node id="24302" label="ENSMUSG00000048022" cy:nodeId="1228">
    <graphics y="195.35999601243918" x="228.27271154346272" z="0.0"/>
  </node>
  <node id="24301" label="ENSMUSG00000047181" cy:nodeId="1229">
    <graphics y="-32.71891100050027" x="-27.870202274896656" z="0.0"/>
  </node>
  <node id="24300" label="ENSMUSG00000047139" cy:nodeId="1230">
    <graphics y="232.325038126697" x="13.269079951665844" z="0.0"/>
  </node>
  <node id="24299" label="ENSMUSG00000046711" cy:nodeId="1231">
    <graphics y="147.82276456712668" x="-308.40142175731853" z="0.0"/>
  </node>
  <node id="24298" label="ENSMUSG00000046410" cy:nodeId="1232">
    <graphics y="-205.00034029127175" x="-163.9618446546574" z="0.0"/>
  </node>
  <node id="24297" label="ENSMUSG00000045827" cy:nodeId="1233">
    <graphics y="60.42045133470481" x="359.2784488481502" z="0.0"/>
  </node>
  <node id="24296" label="ENSMUSG00000045817" cy:nodeId="1234">
    <graphics y="-202.34465486646707" x="79.65961339893147" z="0.0"/>
  </node>
  <node id="24295" label="ENSMUSG00000045328" cy:nodeId="1235">
    <graphics y="197.1417648112673" x="31.64606359424397" z="0.0"/>
  </node>
  <node id="24294" label="ENSMUSG00000045094" cy:nodeId="1236">
    <graphics y="-87.55045778394754" x="-8.482369633295093" z="0.0"/>
  </node>
  <node id="24293" label="ENSMUSG00000044456" cy:nodeId="1237">
    <graphics y="-195.13876802564675" x="-52.99018213329509" z="0.0"/>
  </node>
  <node id="24292" label="ENSMUSG00000044317" cy:nodeId="1238">
    <graphics y="-307.465977498303" x="-216.97124597606853" z="0.0"/>
  </node>
  <node id="24291" label="ENSMUSG00000043953" cy:nodeId="1239">
    <graphics y="-159.95581514478738" x="42.30213048877522" z="0.0"/>
  </node>
  <node id="24290" label="ENSMUSG00000043885" cy:nodeId="1240">
    <graphics y="50.94751279710715" x="27.057287959478344" z="0.0"/>
  </node>
  <node id="24289" label="ENSMUSG00000043432" cy:nodeId="1241">
    <graphics y="544.147059611072" x="56.60658910693928" z="0.0"/>
  </node>
  <node id="24288" label="ENSMUSG00000043391" cy:nodeId="1242">
    <graphics y="-109.0876815998655" x="60.28272130908772" z="0.0"/>
  </node>
  <node id="24287" label="ENSMUSG00000042564" cy:nodeId="1243">
    <graphics y="-169.51257784009988" x="205.31720617236897" z="0.0"/>
  </node>
  <node id="24286" label="ENSMUSG00000042109" cy:nodeId="1244">
    <graphics y="102.69584195970481" x="-210.5480968671818" z="0.0"/>
  </node>
  <node id="24285" label="ENSMUSG00000041859" cy:nodeId="1245">
    <graphics y="140.3608047282595" x="221.7093265336971" z="0.0"/>
  </node>
  <node id="24284" label="ENSMUSG00000041439" cy:nodeId="1246">
    <graphics y="-185.7339218342405" x="-225.0863048749943" z="0.0"/>
  </node>
  <node id="24283" label="ENSMUSG00000041202" cy:nodeId="1247">
    <graphics y="-15.569819279919216" x="-89.02231714306072" z="0.0"/>
  </node>
  <node id="24282" label="ENSMUSG00000040717" cy:nodeId="1248">
    <graphics y="-178.49142915845925" x="-102.30268594799236" z="0.0"/>
  </node>
  <node id="24281" label="ENSMUSG00000040624" cy:nodeId="1249">
    <graphics y="-233.83824617506082" x="34.66535070361897" z="0.0"/>
  </node>
  <node id="24280" label="ENSMUSG00000040528" cy:nodeId="1250">
    <graphics y="-250.6655624592405" x="30.166159419439282" z="0.0"/>
  </node>
  <node id="24279" label="ENSMUSG00000040380" cy:nodeId="1251">
    <graphics y="-123.21046144605691" x="-591.1526424604435" z="0.0"/>
  </node>
  <node id="24278" label="ENSMUSG00000039676" cy:nodeId="1252">
    <graphics y="-113.46181947828347" x="-172.92234346447185" z="0.0"/>
  </node>
  <node id="24277" label="ENSMUSG00000038777" cy:nodeId="1253">
    <graphics y="150.25303190111106" x="164.87821081104084" z="0.0"/>
  </node>
  <node id="24276" label="ENSMUSG00000038745" cy:nodeId="1254">
    <graphics y="-160.97734529615457" x="101.0250003618221" z="0.0"/>
  </node>
  <node id="24275" label="ENSMUSG00000038599" cy:nodeId="1255">
    <graphics y="101.56381528734153" x="-82.85717889843181" z="0.0"/>
  </node>
  <node id="24274" label="ENSMUSG00000038580" cy:nodeId="1256">
    <graphics y="-124.07816774488504" x="-146.13089105663494" z="0.0"/>
  </node>
  <node id="24273" label="ENSMUSG00000038486" cy:nodeId="1257">
    <graphics y="-196.727696248303" x="99.6572025102596" z="0.0"/>
  </node>
  <node id="24272" label="ENSMUSG00000038463" cy:nodeId="1258">
    <graphics y="149.2270156657595" x="-127.23090860424236" z="0.0"/>
  </node>
  <node id="24271" label="ENSMUSG00000038180" cy:nodeId="1259">
    <graphics y="179.40381925462668" x="9.63880041065022" z="0.0"/>
  </node>
  <node id="24270" label="ENSMUSG00000037991" cy:nodeId="1260">
    <graphics y="365.51885526536887" x="69.51143529834553" z="0.0"/>
  </node>
  <node id="24269" label="ENSMUSG00000037868" cy:nodeId="1261">
    <graphics y="7.8148834025759015" x="-1.4368221479435306" z="0.0"/>
  </node>
  <node id="24268" label="ENSMUSG00000037419" cy:nodeId="1262">
    <graphics y="-41.61139375806863" x="243.64801671924397" z="0.0"/>
  </node>
  <node id="24267" label="ENSMUSG00000037032" cy:nodeId="1263">
    <graphics y="-564.374424763928" x="116.93262365283772" z="0.0"/>
  </node>
  <node id="24266" label="ENSMUSG00000036887" cy:nodeId="1264">
    <graphics y="70.61278837083762" x="194.39713170947834" z="0.0"/>
  </node>
  <node id="24265" label="ENSMUSG00000036777" cy:nodeId="1265">
    <graphics y="-85.70612794996316" x="-62.67816278515056" z="0.0"/>
  </node>
  <node id="24264" label="ENSMUSG00000036745" cy:nodeId="1266">
    <graphics y="-36.916809865246364" x="131.6791751665096" z="0.0"/>
  </node>
  <node id="24263" label="ENSMUSG00000036036" cy:nodeId="1267">
    <graphics y="14.329970530261448" x="-37.508500309564624" z="0.0"/>
  </node>
  <node id="24262" label="ENSMUSG00000035561" cy:nodeId="1268">
    <graphics y="2.2335216319460187" x="365.3084781450252" z="0.0"/>
  </node>
  <node id="24261" label="ENSMUSG00000035164" cy:nodeId="1269">
    <graphics y="-338.237706013928" x="77.18282201709553" z="0.0"/>
  </node>
  <node id="24260" label="ENSMUSG00000034855" cy:nodeId="1270">
    <graphics y="234.48371427415793" x="550.374090937994" z="0.0"/>
  </node>
  <node id="24259" label="ENSMUSG00000034349" cy:nodeId="1271">
    <graphics y="-11.080378361950466" x="345.6363590044002" z="0.0"/>
  </node>
  <node id="24258" label="ENSMUSG00000033684" cy:nodeId="1272">
    <graphics y="-2.3580616200071063" x="-103.34532281933025" z="0.0"/>
  </node>
  <node id="24257" label="ENSMUSG00000032839" cy:nodeId="1273">
    <graphics y="-166.35620576978738" x="-272.0988781171818" z="0.0"/>
  </node>
  <node id="24256" label="ENSMUSG00000032661" cy:nodeId="1274">
    <graphics y="416.7375137126345" x="-76.53097650585369" z="0.0"/>
  </node>
  <node id="24255" label="ENSMUSG00000032549" cy:nodeId="1275">
    <graphics y="-91.39563448072488" x="233.96695592822834" z="0.0"/>
  </node>
  <node id="24254" label="ENSMUSG00000031451" cy:nodeId="1276">
    <graphics y="56.91612546800559" x="-131.13617059765056" z="0.0"/>
  </node>
  <node id="24253" label="ENSMUSG00000031403" cy:nodeId="1277">
    <graphics y="446.0199844157595" x="254.88288000049397" z="0.0"/>
  </node>
  <node id="24252" label="ENSMUSG00000031173" cy:nodeId="1278">
    <graphics y="380.622889689197" x="233.87418249072834" z="0.0"/>
  </node>
  <node id="24251" label="ENSMUSG00000030717" cy:nodeId="1279">
    <graphics y="195.3735763347048" x="-101.1113521772404" z="0.0"/>
  </node>
  <node id="24250" label="ENSMUSG00000030359" cy:nodeId="1280">
    <graphics y="-321.4165085041624" x="223.07569005908772" z="0.0"/>
  </node>
  <node id="24249" label="ENSMUSG00000030329" cy:nodeId="1281">
    <graphics y="324.0585586345095" x="-92.368699284174" z="0.0"/>
  </node>
  <node id="24248" label="ENSMUSG00000030263" cy:nodeId="1282">
    <graphics y="69.56135862230246" x="-85.5516826826115" z="0.0"/>
  </node>
  <node id="24247" label="ENSMUSG00000029919" cy:nodeId="1283">
    <graphics y="130.71906583665793" x="-285.6945736127873" z="0.0"/>
  </node>
  <node id="24246" label="ENSMUSG00000029706" cy:nodeId="1284">
    <graphics y="299.7974807536501" x="-199.1272213178654" z="0.0"/>
  </node>
  <node id="24245" label="ENSMUSG00000029561" cy:nodeId="1285">
    <graphics y="-50.29969865919168" x="-321.8401882368107" z="0.0"/>
  </node>
  <node id="24244" label="ENSMUSG00000029370" cy:nodeId="1286">
    <graphics y="228.57073514818137" x="-35.0006572919865" z="0.0"/>
  </node>
  <node id="24243" label="ENSMUSG00000029154" cy:nodeId="1287">
    <graphics y="-286.13181001783425" x="100.12250402393147" z="0.0"/>
  </node>
  <node id="24242" label="ENSMUSG00000028972" cy:nodeId="1288">
    <graphics y="37.587855509509495" x="-270.55870172558025" z="0.0"/>
  </node>
  <node id="24241" label="ENSMUSG00000028749" cy:nodeId="1289">
    <graphics y="11.167056254138402" x="-522.6490719038029" z="0.0"/>
  </node>
  <node id="24240" label="ENSMUSG00000028551" cy:nodeId="1290">
    <graphics y="-79.91270525098855" x="373.74933507861897" z="0.0"/>
  </node>
  <node id="24239" label="ENSMUSG00000028403" cy:nodeId="1291">
    <graphics y="-113.06604463697488" x="227.1202152055721" z="0.0"/>
  </node>
  <node id="24238" label="ENSMUSG00000028076" cy:nodeId="1292">
    <graphics y="-196.31161958814675" x="38.75261571826741" z="0.0"/>
  </node>
  <node id="24237" label="ENSMUSG00000028057" cy:nodeId="1293">
    <graphics y="266.6047317302126" x="-141.7087576108952" z="0.0"/>
  </node>
  <node id="24236" label="ENSMUSG00000027938" cy:nodeId="1294">
    <graphics y="-121.14954073072488" x="4.878943232915844" z="0.0"/>
  </node>
  <node id="24235" label="ENSMUSG00000027931" cy:nodeId="1295">
    <graphics y="-47.009949513683864" x="-205.36198923168376" z="0.0"/>
  </node>
  <node id="24234" label="ENSMUSG00000027890" cy:nodeId="1296">
    <graphics y="-146.6421249592405" x="-270.16278192577556" z="0.0"/>
  </node>
  <node id="24233" label="ENSMUSG00000027750" cy:nodeId="1297">
    <graphics y="-118.89091188551004" x="-61.26885339794353" z="0.0"/>
  </node>
  <node id="24232" label="ENSMUSG00000027375" cy:nodeId="1298">
    <graphics y="356.917567423572" x="-125.23706171093181" z="0.0"/>
  </node>
  <node id="24231" label="ENSMUSG00000026955" cy:nodeId="1299">
    <graphics y="180.67095487474387" x="-48.10163232860759" z="0.0"/>
  </node>
  <node id="24230" label="ENSMUSG00000026815" cy:nodeId="1300">
    <graphics y="8.924777201404027" x="-35.516892643549" z="0.0"/>
  </node>
  <node id="24229" label="ENSMUSG00000026700" cy:nodeId="1301">
    <graphics y="-328.1378219807249" x="-120.28255197582439" z="0.0"/>
  </node>
  <node id="24228" label="ENSMUSG00000026657" cy:nodeId="1302">
    <graphics y="129.84455411790793" x="261.5365970415096" z="0.0"/>
  </node>
  <node id="24227" label="ENSMUSG00000026646" cy:nodeId="1303">
    <graphics y="-76.77904207349832" x="141.13312414111897" z="0.0"/>
  </node>
  <node id="24226" label="ENSMUSG00000026102" cy:nodeId="1304">
    <graphics y="-172.9831131184202" x="-123.92982217846111" z="0.0"/>
  </node>
  <node id="24225" label="ENSMUSG00000026072" cy:nodeId="1305">
    <graphics y="-54.18542177320535" x="-201.44239923534587" z="0.0"/>
  </node>
  <node id="24224" label="ENSMUSG00000026068" cy:nodeId="1306">
    <graphics y="163.77527921556418" x="-247.30016443309978" z="0.0"/>
  </node>
  <node id="24223" label="ENSMUSG00000025810" cy:nodeId="1307">
    <graphics y="39.43839567064231" x="-102.04199335155681" z="0.0"/>
  </node>
  <node id="24222" label="ENSMUSG00000025507" cy:nodeId="1308">
    <graphics y="138.91112821458762" x="-373.1352474409123" z="0.0"/>
  </node>
  <node id="24221" label="ENSMUSG00000025492" cy:nodeId="1309">
    <graphics y="152.53155057786887" x="143.9075687211971" z="0.0"/>
  </node>
  <node id="24220" label="ENSMUSG00000025059" cy:nodeId="1310">
    <graphics y="-52.76144106031472" x="217.76599767627522" z="0.0"/>
  </node>
  <node id="24219" label="ENSMUSG00000024901" cy:nodeId="1311">
    <graphics y="-261.7578476154905" x="33.25159337940022" z="0.0"/>
  </node>
  <node id="24218" label="ENSMUSG00000024810" cy:nodeId="1312">
    <graphics y="-158.902012654553" x="-192.42308923778728" z="0.0"/>
  </node>
  <node id="24217" label="ENSMUSG00000024646" cy:nodeId="1313">
    <graphics y="35.87436597703879" x="210.87012365283772" z="0.0"/>
  </node>
  <node id="24216" label="ENSMUSG00000024621" cy:nodeId="1314">
    <graphics y="-241.5879257404905" x="-14.37243005809978" z="0.0"/>
  </node>
  <node id="24215" label="ENSMUSG00000024613" cy:nodeId="1315">
    <graphics y="-131.1101654255491" x="-216.17484781322673" z="0.0"/>
  </node>
  <node id="24214" label="ENSMUSG00000023908" cy:nodeId="1316">
    <graphics y="-158.00096590162332" x="-266.8878185468693" z="0.0"/>
  </node>
  <node id="24213" label="ENSMUSG00000023827" cy:nodeId="1317">
    <graphics y="-288.40622408033425" x="235.85059240283772" z="0.0"/>
  </node>
  <node id="24212" label="ENSMUSG00000023473" cy:nodeId="1318">
    <graphics y="-260.5671737873655" x="185.1609866899471" z="0.0"/>
  </node>
  <node id="24211" label="ENSMUSG00000023050" cy:nodeId="1319">
    <graphics y="111.76151578782981" x="-340.68518945751384" z="0.0"/>
  </node>
  <node id="24210" label="ENSMUSG00000022208" cy:nodeId="1320">
    <graphics y="-122.07033998609597" x="-85.49085352001384" z="0.0"/>
  </node>
  <node id="24209" label="ENSMUSG00000021720" cy:nodeId="1321">
    <graphics y="-413.951817342053" x="-252.39320489940837" z="0.0"/>
  </node>
  <node id="24208" label="ENSMUSG00000021587" cy:nodeId="1322">
    <graphics y="151.76928251146262" x="22.480566768072094" z="0.0"/>
  </node>
  <node id="24207" label="ENSMUSG00000021396" cy:nodeId="1323">
    <graphics y="-277.38446504713113" x="-42.61840173778728" z="0.0"/>
  </node>
  <node id="24206" label="ENSMUSG00000021281" cy:nodeId="1324">
    <graphics y="-262.85004121900613" x="-37.19442865429119" z="0.0"/>
  </node>
  <node id="24205" label="ENSMUSG00000021256" cy:nodeId="1325">
    <graphics y="125.40244596361106" x="90.72615697803303" z="0.0"/>
  </node>
  <node id="24204" label="ENSMUSG00000020620" cy:nodeId="1326">
    <graphics y="94.20608060716575" x="-277.94798395214275" z="0.0"/>
  </node>
  <node id="24203" label="ENSMUSG00000020581" cy:nodeId="1327">
    <graphics y="256.63845365404075" x="-117.59209558544353" z="0.0"/>
  </node>
  <node id="24202" label="ENSMUSG00000020218" cy:nodeId="1328">
    <graphics y="181.74851529954856" x="62.35883214893147" z="0.0"/>
  </node>
  <node id="24201" label="ENSMUSG00000017868" cy:nodeId="1329">
    <graphics y="243.84636991380637" x="-180.93894502697185" z="0.0"/>
  </node>
  <node id="24200" label="ENSMUSG00000017144" cy:nodeId="1330">
    <graphics y="103.69521634935325" x="118.68924596729084" z="0.0"/>
  </node>
  <node id="24199" label="ENSMUSG00000017057" cy:nodeId="1331">
    <graphics y="-91.50305635572488" x="201.71228673877522" z="0.0"/>
  </node>
  <node id="24198" label="ENSMUSG00000017009" cy:nodeId="1332">
    <graphics y="-305.97873384595925" x="-80.68267938671306" z="0.0"/>
  </node>
  <node id="24197" label="ENSMUSG00000016200" cy:nodeId="1333">
    <graphics y="-194.3654373371702" x="133.4595706743221" z="0.0"/>
  </node>
  <node id="24196" label="ENSMUSG00000015962" cy:nodeId="1334">
    <graphics y="-25.987491437206813" x="-16.100930424310718" z="0.0"/>
  </node>
  <node id="24195" label="ENSMUSG00000015396" cy:nodeId="1335">
    <graphics y="-164.76140291334207" x="-88.33352777538494" z="0.0"/>
  </node>
  <node id="24194" label="ENSMUSG00000013698" cy:nodeId="1336">
    <graphics y="-2.5413368427854266" x="-404.8589565473576" z="0.0"/>
  </node>
  <node id="24193" label="ENSMUSG00000013523" cy:nodeId="1337">
    <graphics y="-10.367645093212673" x="-311.16712305126384" z="0.0"/>
  </node>
  <node id="24192" label="ENSMUSG00000012017" cy:nodeId="1338">
    <graphics y="206.88054960130637" x="-182.92882272777751" z="0.0"/>
  </node>
  <node id="24191" label="ENSMUSG00000009246" cy:nodeId="1339">
    <graphics y="402.4172317302126" x="17.840063838384594" z="0.0"/>
  </node>
  <node id="24190" label="ENSMUSG00000009108" cy:nodeId="1340">
    <graphics y="47.835780314196995" x="-364.4409420209904" z="0.0"/>
  </node>
  <node id="24189" label="ENSMUSG00000009092" cy:nodeId="1341">
    <graphics y="15.835059336413792" x="198.01953771533772" z="0.0"/>
  </node>
  <node id="24188" label="ENSMUSG00000006546" cy:nodeId="1342">
    <graphics y="144.51568143724387" x="-354.6126949506779" z="0.0"/>
  </node>
  <node id="24187" label="ENSMUSG00000005873" cy:nodeId="1343">
    <graphics y="-140.13977510572488" x="-198.93419382152751" z="0.0"/>
  </node>
  <node id="24186" label="ENSMUSG00000004952" cy:nodeId="1344">
    <graphics y="4.353459528674534" x="210.6707523149471" z="0.0"/>
  </node>
  <node id="24185" label="ENSMUSG00000004709" cy:nodeId="1345">
    <graphics y="136.42296903490012" x="-92.74574396190837" z="0.0"/>
  </node>
  <node id="24184" label="ENSMUSG00000003541" cy:nodeId="1346">
    <graphics y="102.17259519456809" x="100.36902502002522" z="0.0"/>
  </node>
  <node id="24183" label="ENSMUSG00000003469" cy:nodeId="1347">
    <graphics y="241.36452787279075" x="8.841162471197094" z="0.0"/>
  </node>
  <node id="24182" label="ENSMUSG00000003228" cy:nodeId="1348">
    <graphics y="198.56627958177512" x="-424.4538509565373" z="0.0"/>
  </node>
  <node id="24181" label="ENSMUSG00000002668" cy:nodeId="1349">
    <graphics y="6.6621429240602765" x="-417.5934993940373" z="0.0"/>
  </node>
  <node id="24180" label="ENSMUSG00000001761" cy:nodeId="1350">
    <graphics y="-87.77650911451394" x="260.6929691118221" z="0.0"/>
  </node>
  <node id="24179" label="ENSMUSG00000001281" cy:nodeId="1351">
    <graphics y="-437.22409517408425" x="-53.80759546337322" z="0.0"/>
  </node>
  <node id="24178" label="ENSMUSG00000000555" cy:nodeId="1352">
    <graphics y="198.15111844896262" x="-98.87374612865642" z="0.0"/>
  </node>
  <node id="24177" label="ENSMUSG00000018623" cy:nodeId="1353">
    <graphics y="645.9092056071657" x="40.65853002490803" z="0.0"/>
  </node>
  <node id="24176" label="ENSMUSG00000017724" cy:nodeId="1354">
    <graphics y="287.49969022630637" x="-311.52144739208416" z="0.0"/>
  </node>
  <node id="24175" label="ENSMUSG00000056758" cy:nodeId="1355">
    <graphics y="-130.05585176588113" x="-156.27126261768535" z="0.0"/>
  </node>
  <node id="24174" label="ENSMUSG00000015468" cy:nodeId="1356">
    <graphics y="-245.45847017408425" x="-188.33245966015056" z="0.0"/>
  </node>
  <node id="24173" label="ENSMUSG00000092083" cy:nodeId="1357">
    <graphics y="-355.839756795178" x="-23.198434086420093" z="0.0"/>
  </node>
  <node id="24172" label="ENSMUSG00000074652" cy:nodeId="1358">
    <graphics y="-284.1033065998655" x="27.338248042486157" z="0.0"/>
  </node>
  <node id="24171" label="ENSMUSG00000070867" cy:nodeId="1359">
    <graphics y="-126.21672517896707" x="-186.1733638959904" z="0.0"/>
  </node>
  <node id="24170" label="ENSMUSG00000069255" cy:nodeId="1360">
    <graphics y="187.23108976243918" x="124.48160436572834" z="0.0"/>
  </node>
  <node id="24169" label="ENSMUSG00000068196" cy:nodeId="1361">
    <graphics y="267.69985502122825" x="114.59241369190022" z="0.0"/>
  </node>
  <node id="24168" label="ENSMUSG00000063568" cy:nodeId="1362">
    <graphics y="-188.539219685803" x="-164.8830592351933" z="0.0"/>
  </node>
  <node id="24167" label="ENSMUSG00000062078" cy:nodeId="1363">
    <graphics y="-59.05114442945535" x="69.82437780322834" z="0.0"/>
  </node>
  <node id="24166" label="ENSMUSG00000061171" cy:nodeId="1364">
    <graphics y="-672.4471176350218" x="-52.25999567089275" z="0.0"/>
  </node>
  <node id="24165" label="ENSMUSG00000057716" cy:nodeId="1365">
    <graphics y="482.07082670091575" x="108.78430822315022" z="0.0"/>
  </node>
  <node id="24164" label="ENSMUSG00000055485" cy:nodeId="1366">
    <graphics y="-246.724522420178" x="85.88539770068928" z="0.0"/>
  </node>
  <node id="24163" label="ENSMUSG00000052353" cy:nodeId="1367">
    <graphics y="173.9752609050173" x="-231.72377130565837" z="0.0"/>
  </node>
  <node id="24162" label="ENSMUSG00000048349" cy:nodeId="1368">
    <graphics y="-95.45643312574441" x="133.81024816455647" z="0.0"/>
  </node>
  <node id="24161" label="ENSMUSG00000045518" cy:nodeId="1369">
    <graphics y="-428.33810884595925" x="123.53015783252522" z="0.0"/>
  </node>
  <node id="24160" label="ENSMUSG00000045312" cy:nodeId="1370">
    <graphics y="109.20141141771262" x="304.51541784229084" z="0.0"/>
  </node>
  <node id="24159" label="ENSMUSG00000044288" cy:nodeId="1371">
    <graphics y="-138.18993074537332" x="119.29263952197834" z="0.0"/>
  </node>
  <node id="24158" label="ENSMUSG00000042258" cy:nodeId="1372">
    <graphics y="4.402436426867894" x="58.37969091357991" z="0.0"/>
  </node>
  <node id="24157" label="ENSMUSG00000033278" cy:nodeId="1373">
    <graphics y="-97.914952107678" x="-357.44120142040447" z="0.0"/>
  </node>
  <node id="24156" label="ENSMUSG00000032773" cy:nodeId="1374">
    <graphics y="381.9960891520876" x="-206.2911617475529" z="0.0"/>
  </node>
  <node id="24155" label="ENSMUSG00000032356" cy:nodeId="1375">
    <graphics y="-195.3683670246702" x="-139.6900589185734" z="0.0"/>
  </node>
  <node id="24154" label="ENSMUSG00000032285" cy:nodeId="1376">
    <graphics y="-247.28024751783425" x="-22.37499353466228" z="0.0"/>
  </node>
  <node id="24153" label="ENSMUSG00000031756" cy:nodeId="1377">
    <graphics y="40.5150787150759" x="-308.4802181440373" z="0.0"/>
  </node>
  <node id="24152" label="ENSMUSG00000031586" cy:nodeId="1378">
    <graphics y="-8.19989473463113" x="101.40863683643147" z="0.0"/>
  </node>
  <node id="24151" label="ENSMUSG00000028986" cy:nodeId="1379">
    <graphics y="191.54821317552512" x="143.71625402393147" z="0.0"/>
  </node>
  <node id="24150" label="ENSMUSG00000027524" cy:nodeId="1380">
    <graphics y="85.04236142991965" x="-315.1147243696232" z="0.0"/>
  </node>
  <node id="24149" label="ENSMUSG00000026959" cy:nodeId="1381">
    <graphics y="-125.76925356031472" x="114.39722326221272" z="0.0"/>
  </node>
  <node id="24148" label="ENSMUSG00000026527" cy:nodeId="1382">
    <graphics y="-139.7406128132444" x="283.1816165727596" z="0.0"/>
  </node>
  <node id="24147" label="ENSMUSG00000024743" cy:nodeId="1383">
    <graphics y="-66.49850542188699" x="132.1080081743221" z="0.0"/>
  </node>
  <node id="24146" label="ENSMUSG00000024533" cy:nodeId="1384">
    <graphics y="126.35779874681418" x="-18.239464970209156" z="0.0"/>
  </node>
  <node id="24145" label="ENSMUSG00000024366" cy:nodeId="1385">
    <graphics y="46.32306974290793" x="-156.21425554332927" z="0.0"/>
  </node>
  <node id="24144" label="ENSMUSG00000023092" cy:nodeId="1386">
    <graphics y="-215.061924763928" x="251.97598913135334" z="0.0"/>
  </node>
  <node id="24143" label="ENSMUSG00000022489" cy:nodeId="1387">
    <graphics y="103.11569517015403" x="50.46825292529866" z="0.0"/>
  </node>
  <node id="24142" label="ENSMUSG00000022422" cy:nodeId="1388">
    <graphics y="-451.63058931470925" x="-11.615823002435718" z="0.0"/>
  </node>
  <node id="24141" label="ENSMUSG00000021685" cy:nodeId="1389">
    <graphics y="-133.8068969929319" x="-87.83802911815837" z="0.0"/>
  </node>
  <node id="24140" label="ENSMUSG00000021061" cy:nodeId="1390">
    <graphics y="20.16576688646262" x="-212.26646158275798" z="0.0"/>
  </node>
  <node id="24139" label="ENSMUSG00000020427" cy:nodeId="1391">
    <graphics y="-44.84420854688699" x="-330.23931238231853" z="0.0"/>
  </node>
  <node id="24138" label="ENSMUSG00000019232" cy:nodeId="1392">
    <graphics y="-107.66563875318582" x="214.58988073291584" z="0.0"/>
  </node>
  <node id="24137" label="ENSMUSG00000010021" cy:nodeId="1393">
    <graphics y="19.605033091296605" x="-224.31514856395916" z="0.0"/>
  </node>
  <node id="24136" label="ENSMUSG00000006586" cy:nodeId="1394">
    <graphics y="87.66971891282981" x="-18.653954716302906" z="0.0"/>
  </node>
  <node id="24135" label="ENSMUSG00000001985" cy:nodeId="1395">
    <graphics y="-216.78174287916238" x="-289.1400844770451" z="0.0"/>
  </node>
  <node id="24134" label="ENSMUSG00000012350" cy:nodeId="1396">
    <graphics y="-28.332970448742458" x="-79.42730066356853" z="0.0"/>
  </node>
  <node id="24133" label="ENSMUSG00000059588" cy:nodeId="1397">
    <graphics y="-427.71872408033425" x="251.44327428760334" z="0.0"/>
  </node>
  <node id="24132" label="ENSMUSG00000038530" cy:nodeId="1398">
    <graphics y="-53.11433870435769" x="89.67067602100178" z="0.0"/>
  </node>
  <node id="24131" label="ENSMUSG00000098557" cy:nodeId="1399">
    <graphics y="-230.60016328931863" x="-175.94968149242595" z="0.0"/>
  </node>
  <node id="24130" label="ENSMUSG00000096054" cy:nodeId="1400">
    <graphics y="321.896571329822" x="18.85687902393147" z="0.0"/>
  </node>
  <node id="24129" label="ENSMUSG00000092486" cy:nodeId="1401">
    <graphics y="-282.266758748303" x="-36.210740299799" z="0.0"/>
  </node>
  <node id="24128" label="ENSMUSG00000090626" cy:nodeId="1402">
    <graphics y="-41.545018025646755" x="254.53516271533772" z="0.0"/>
  </node>
  <node id="24127" label="ENSMUSG00000089789" cy:nodeId="1403">
    <graphics y="-31.71665842176492" x="-215.98690149364666" z="0.0"/>
  </node>
  <node id="24126" label="ENSMUSG00000079685" cy:nodeId="1404">
    <graphics y="102.68949430345481" x="116.48172643604084" z="0.0"/>
  </node>
  <node id="24125" label="ENSMUSG00000079471" cy:nodeId="1405">
    <graphics y="-274.954991170178" x="0.24855688037678192" z="0.0"/>
  </node>
  <node id="24124" label="ENSMUSG00000079038" cy:nodeId="1406">
    <graphics y="-181.8919265949827" x="-2.802560062982593" z="0.0"/>
  </node>
  <node id="24123" label="ENSMUSG00000078949" cy:nodeId="1407">
    <graphics y="210.31385343431418" x="115.38556554736897" z="0.0"/>
  </node>
  <node id="24122" label="ENSMUSG00000078349" cy:nodeId="1408">
    <graphics y="179.4426681315798" x="72.07193639697834" z="0.0"/>
  </node>
  <node id="24121" label="ENSMUSG00000075702" cy:nodeId="1409">
    <graphics y="302.0243789470095" x="52.40813329639241" z="0.0"/>
  </node>
  <node id="24120" label="ENSMUSG00000072620" cy:nodeId="1410">
    <graphics y="95.76675718187278" x="-213.2697765546818" z="0.0"/>
  </node>
  <node id="24119" label="ENSMUSG00000072082" cy:nodeId="1411">
    <graphics y="-74.17554170728738" x="123.24591710986897" z="0.0"/>
  </node>
  <node id="24118" label="ENSMUSG00000071719" cy:nodeId="1412">
    <graphics y="174.48176114915793" x="173.51605871143147" z="0.0"/>
  </node>
  <node id="24117" label="ENSMUSG00000070407" cy:nodeId="1413">
    <graphics y="-90.05055696607644" x="-105.40329095897869" z="0.0"/>
  </node>
  <node id="24116" label="ENSMUSG00000070337" cy:nodeId="1414">
    <graphics y="200.20922391771262" x="249.9816654008846" z="0.0"/>
  </node>
  <node id="24115" label="ENSMUSG00000069114" cy:nodeId="1415">
    <graphics y="336.751307657947" x="82.39333227100178" z="0.0"/>
  </node>
  <node id="24114" label="ENSMUSG00000068735" cy:nodeId="1416">
    <graphics y="134.36896818040793" x="-338.9748470502873" z="0.0"/>
  </node>
  <node id="24113" label="ENSMUSG00000068101" cy:nodeId="1417">
    <graphics y="-112.29880220533425" x="-390.84517786083416" z="0.0"/>
  </node>
  <node id="24112" label="ENSMUSG00000066705" cy:nodeId="1418">
    <graphics y="112.39185636400168" x="143.50067785205647" z="0.0"/>
  </node>
  <node id="24111" label="ENSMUSG00000064267" cy:nodeId="1419">
    <graphics y="-415.355870076428" x="-113.03880426464275" z="0.0"/>
  </node>
  <node id="24110" label="ENSMUSG00000061455" cy:nodeId="1420">
    <graphics y="98.93711393236106" x="-83.6938717084904" z="0.0"/>
  </node>
  <node id="24109" label="ENSMUSG00000060671" cy:nodeId="1421">
    <graphics y="-94.41476137281472" x="-342.0246364789982" z="0.0"/>
  </node>
  <node id="24108" label="ENSMUSG00000059412" cy:nodeId="1422">
    <graphics y="-248.41611177564675" x="-461.78728601513103" z="0.0"/>
  </node>
  <node id="24107" label="ENSMUSG00000059060" cy:nodeId="1423">
    <graphics y="-396.47845918775613" x="-127.91101953563884" z="0.0"/>
  </node>
  <node id="24106" label="ENSMUSG00000055407" cy:nodeId="1424">
    <graphics y="-177.25421602369363" x="-513.9241573530217" z="0.0"/>
  </node>
  <node id="24105" label="ENSMUSG00000054640" cy:nodeId="1425">
    <graphics y="-224.62315828443582" x="-389.12725183544353" z="0.0"/>
  </node>
  <node id="24104" label="ENSMUSG00000053846" cy:nodeId="1426">
    <graphics y="-188.95941621900613" x="-70.80828973827556" z="0.0"/>
  </node>
  <node id="24103" label="ENSMUSG00000051359" cy:nodeId="1427">
    <graphics y="288.16384427904075" x="77.02144506397053" z="0.0"/>
  </node>
  <node id="24102" label="ENSMUSG00000051344" cy:nodeId="1428">
    <graphics y="-182.60173494459207" x="-383.92278406200603" z="0.0"/>
  </node>
  <node id="24101" label="ENSMUSG00000051079" cy:nodeId="1429">
    <graphics y="-202.53650362134988" x="84.1628940385799" z="0.0"/>
  </node>
  <node id="24100" label="ENSMUSG00000050395" cy:nodeId="1430">
    <graphics y="366.0602676188845" x="-131.00340005932048" z="0.0"/>
  </node>
  <node id="24099" label="ENSMUSG00000049858" cy:nodeId="1431">
    <graphics y="-329.38254243970925" x="68.35013463916584" z="0.0"/>
  </node>
  <node id="24098" label="ENSMUSG00000049807" cy:nodeId="1432">
    <graphics y="-13.526532002697536" x="-222.6475536542912" z="0.0"/>
  </node>
  <node id="24097" label="ENSMUSG00000049608" cy:nodeId="1433">
    <graphics y="233.23208158372825" x="98.80139806690022" z="0.0"/>
  </node>
  <node id="24096" label="ENSMUSG00000047878" cy:nodeId="1434">
    <graphics y="129.747645548572" x="175.66422155322834" z="0.0"/>
  </node>
  <node id="24095" label="ENSMUSG00000047230" cy:nodeId="1435">
    <graphics y="126.67849271654075" x="274.95307043018147" z="0.0"/>
  </node>
  <node id="24094" label="ENSMUSG00000045751" cy:nodeId="1436">
    <graphics y="19.738970926989964" x="-58.750687809564624" z="0.0"/>
  </node>
  <node id="24093" label="ENSMUSG00000045667" cy:nodeId="1437">
    <graphics y="78.42758481859153" x="-223.02288171825603" z="0.0"/>
  </node>
  <node id="24092" label="ENSMUSG00000045007" cy:nodeId="1438">
    <graphics y="-90.63397676588113" x="-48.64939996776775" z="0.0"/>
  </node>
  <node id="24091" label="ENSMUSG00000044933" cy:nodeId="1439">
    <graphics y="-237.3911483967405" x="-48.18511316356853" z="0.0"/>
  </node>
  <node id="24090" label="ENSMUSG00000044734" cy:nodeId="1440">
    <graphics y="-291.2309921467405" x="-111.8097507673283" z="0.0"/>
  </node>
  <node id="24089" label="ENSMUSG00000044340" cy:nodeId="1441">
    <graphics y="207.51490323900168" x="436.63959386768147" z="0.0"/>
  </node>
  <node id="24088" label="ENSMUSG00000044337" cy:nodeId="1442">
    <graphics y="-291.32834322095925" x="-33.08108636913494" z="0.0"/>
  </node>
  <node id="24087" label="ENSMUSG00000044072" cy:nodeId="1443">
    <graphics y="205.60499112962668" x="58.30095556201741" z="0.0"/>
  </node>
  <node id="24086" label="ENSMUSG00000041390" cy:nodeId="1444">
    <graphics y="-200.69289095045144" x="54.322180537603344" z="0.0"/>
  </node>
  <node id="24085" label="ENSMUSG00000040990" cy:nodeId="1445">
    <graphics y="250.7919570720095" x="-82.22686121044353" z="0.0"/>
  </node>
  <node id="24084" label="ENSMUSG00000040563" cy:nodeId="1446">
    <graphics y="207.36370389818137" x="154.81055334033772" z="0.0"/>
  </node>
  <node id="24083" label="ENSMUSG00000040035" cy:nodeId="1447">
    <graphics y="258.0815078532595" x="-108.5609829145451" z="0.0"/>
  </node>
  <node id="24082" label="ENSMUSG00000039943" cy:nodeId="1448">
    <graphics y="-4.469799824963161" x="-163.09617826519207" z="0.0"/>
  </node>
  <node id="24081" label="ENSMUSG00000039395" cy:nodeId="1449">
    <graphics y="-63.42395479322488" x="132.41547277393147" z="0.0"/>
  </node>
  <node id="24080" label="ENSMUSG00000039323" cy:nodeId="1450">
    <graphics y="147.32744901536887" x="-471.47283289013103" z="0.0"/>
  </node>
  <node id="24079" label="ENSMUSG00000039304" cy:nodeId="1451">
    <graphics y="331.56875150560325" x="139.35559728565022" z="0.0"/>
  </node>
  <node id="24078" label="ENSMUSG00000038648" cy:nodeId="1452">
    <graphics y="-140.4382446491819" x="-49.345055790521656" z="0.0"/>
  </node>
  <node id="24077" label="ENSMUSG00000038390" cy:nodeId="1453">
    <graphics y="-123.97137910963113" x="337.9245364946346" z="0.0"/>
  </node>
  <node id="24076" label="ENSMUSG00000036892" cy:nodeId="1454">
    <graphics y="-217.45782930494363" x="115.12006261768147" z="0.0"/>
  </node>
  <node id="24075" label="ENSMUSG00000036223" cy:nodeId="1455">
    <graphics y="-241.52043611646707" x="5.601202754400219" z="0.0"/>
  </node>
  <node id="24074" label="ENSMUSG00000035967" cy:nodeId="1456">
    <graphics y="197.91077726243918" x="-236.71135828075603" z="0.0"/>
  </node>
  <node id="24073" label="ENSMUSG00000035863" cy:nodeId="1457">
    <graphics y="317.8101760661501" x="58.14893224658772" z="0.0"/>
  </node>
  <node id="24072" label="ENSMUSG00000035849" cy:nodeId="1458">
    <graphics y="118.38798063157981" x="44.81954076709553" z="0.0"/>
  </node>
  <node id="24071" label="ENSMUSG00000035692" cy:nodeId="1459">
    <graphics y="-176.91484529615457" x="110.82501867236897" z="0.0"/>
  </node>
  <node id="24070" label="ENSMUSG00000035506" cy:nodeId="1460">
    <graphics y="-318.29636079908425" x="-209.88637277660564" z="0.0"/>
  </node>
  <node id="24069" label="ENSMUSG00000035095" cy:nodeId="1461">
    <graphics y="159.87153165697043" x="224.11139562549397" z="0.0"/>
  </node>
  <node id="24068" label="ENSMUSG00000034906" cy:nodeId="1462">
    <graphics y="189.94324796556418" x="150.0759036821346" z="0.0"/>
  </node>
  <node id="24067" label="ENSMUSG00000034768" cy:nodeId="1463">
    <graphics y="-152.16626436353738" x="17.484274653814282" z="0.0"/>
  </node>
  <node id="24066" label="ENSMUSG00000034353" cy:nodeId="1464">
    <graphics y="154.78940885423606" x="-112.3992054182072" z="0.0"/>
  </node>
  <node id="24065" label="ENSMUSG00000033970" cy:nodeId="1465">
    <graphics y="-131.93730623365457" x="-417.22310754833416" z="0.0"/>
  </node>
  <node id="24064" label="ENSMUSG00000033752" cy:nodeId="1466">
    <graphics y="-98.62425691724832" x="-267.55046960888103" z="0.0"/>
  </node>
  <node id="24063" label="ENSMUSG00000032733" cy:nodeId="1467">
    <graphics y="-2.1395004475217547" x="-72.23059961376384" z="0.0"/>
  </node>
  <node id="24062" label="ENSMUSG00000032489" cy:nodeId="1468">
    <graphics y="-220.51959688306863" x="-10.943566532709156" z="0.0"/>
  </node>
  <node id="24061" label="ENSMUSG00000032470" cy:nodeId="1469">
    <graphics y="-133.83989412427957" x="353.3866946977596" z="0.0"/>
  </node>
  <node id="24060" label="ENSMUSG00000032400" cy:nodeId="1470">
    <graphics y="-232.38654024244363" x="216.0489261430721" z="0.0"/>
  </node>
  <node id="24059" label="ENSMUSG00000032251" cy:nodeId="1471">
    <graphics y="-49.67391283155496" x="182.39981725635334" z="0.0"/>
  </node>
  <node id="24058" label="ENSMUSG00000032120" cy:nodeId="1472">
    <graphics y="152.70371549486106" x="-89.5211422163029" z="0.0"/>
  </node>
  <node id="24057" label="ENSMUSG00000031957" cy:nodeId="1473">
    <graphics y="80.30252378343528" x="180.26392248096272" z="0.0"/>
  </node>
  <node id="24056" label="ENSMUSG00000031730" cy:nodeId="1474">
    <graphics y="182.9535781657595" x="-153.27270242748455" z="0.0"/>
  </node>
  <node id="24055" label="ENSMUSG00000031448" cy:nodeId="1475">
    <graphics y="-0.5987575733762469" x="-339.19307825145916" z="0.0"/>
  </node>
  <node id="24054" label="ENSMUSG00000031155" cy:nodeId="1476">
    <graphics y="285.31264798997825" x="25.627402095220532" z="0.0"/>
  </node>
  <node id="24053" label="ENSMUSG00000030866" cy:nodeId="1477">
    <graphics y="-198.13219148756082" x="93.35333898486897" z="0.0"/>
  </node>
  <node id="24052" label="ENSMUSG00000030677" cy:nodeId="1478">
    <graphics y="243.22610013841575" x="-230.99956628856853" z="0.0"/>
  </node>
  <node id="24051" label="ENSMUSG00000030659" cy:nodeId="1479">
    <graphics y="37.49491422532981" x="307.5185306352596" z="0.0"/>
  </node>
  <node id="24050" label="ENSMUSG00000030411" cy:nodeId="1480">
    <graphics y="230.95400541185325" x="-93.70505258617595" z="0.0"/>
  </node>
  <node id="24049" label="ENSMUSG00000029490" cy:nodeId="1481">
    <graphics y="-318.8494003498655" x="-108.56444665966228" z="0.0"/>
  </node>
  <node id="24048" label="ENSMUSG00000029177" cy:nodeId="1482">
    <graphics y="-149.70766145826394" x="164.54389074268147" z="0.0"/>
  </node>
  <node id="24047" label="ENSMUSG00000029102" cy:nodeId="1483">
    <graphics y="174.41332548021262" x="-263.63677331981853" z="0.0"/>
  </node>
  <node id="24046" label="ENSMUSG00000028949" cy:nodeId="1484">
    <graphics y="66.64452665208762" x="-372.53902551708416" z="0.0"/>
  </node>
  <node id="24045" label="ENSMUSG00000028926" cy:nodeId="1485">
    <graphics y="105.01130216478293" x="221.14325597705647" z="0.0"/>
  </node>
  <node id="24044" label="ENSMUSG00000028825" cy:nodeId="1486">
    <graphics y="-32.08611375928933" x="155.93622472705647" z="0.0"/>
  </node>
  <node id="24043" label="ENSMUSG00000028763" cy:nodeId="1487">
    <graphics y="96.72465818284934" x="161.78497960986897" z="0.0"/>
  </node>
  <node id="24042" label="ENSMUSG00000028573" cy:nodeId="1488">
    <graphics y="-113.1118515217405" x="-264.42998621044353" z="0.0"/>
  </node>
  <node id="24041" label="ENSMUSG00000027661" cy:nodeId="1489">
    <graphics y="126.53580778001731" x="1.7833621782283444" z="0.0"/>
  </node>
  <node id="24040" label="ENSMUSG00000027499" cy:nodeId="1490">
    <graphics y="140.73430936693137" x="-74.08877679882244" z="0.0"/>
  </node>
  <node id="24039" label="ENSMUSG00000027456" cy:nodeId="1491">
    <graphics y="-158.54877168775613" x="-134.03171274242595" z="0.0"/>
  </node>
  <node id="24038" label="ENSMUSG00000027435" cy:nodeId="1492">
    <graphics y="-195.64816743970925" x="-223.1321499067326" z="0.0"/>
  </node>
  <node id="24037" label="ENSMUSG00000027420" cy:nodeId="1493">
    <graphics y="211.86790006517356" x="-129.44398042736248" z="0.0"/>
  </node>
  <node id="24036" label="ENSMUSG00000027346" cy:nodeId="1494">
    <graphics y="-215.6812332356077" x="83.44550207080647" z="0.0"/>
  </node>
  <node id="24035" label="ENSMUSG00000027018" cy:nodeId="1495">
    <graphics y="438.67010038255637" x="123.97376134815022" z="0.0"/>
  </node>
  <node id="24034" label="ENSMUSG00000026930" cy:nodeId="1496">
    <graphics y="156.47790067552512" x="40.75044897022053" z="0.0"/>
  </node>
  <node id="24033" label="ENSMUSG00000026864" cy:nodeId="1497">
    <graphics y="-266.18462068677957" x="113.34863927783772" z="0.0"/>
  </node>
  <node id="24032" label="ENSMUSG00000026669" cy:nodeId="1498">
    <graphics y="-218.44646150709207" x="54.384314326665844" z="0.0"/>
  </node>
  <node id="24031" label="ENSMUSG00000026480" cy:nodeId="1499">
    <graphics y="-176.19386751295144" x="-131.34849855480388" z="0.0"/>
  </node>
  <node id="24030" label="ENSMUSG00000026430" cy:nodeId="1500">
    <graphics y="118.743006876697" x="-235.34312555370525" z="0.0"/>
  </node>
  <node id="24029" label="ENSMUSG00000026380" cy:nodeId="1501">
    <graphics y="24.30186765550559" x="252.55591466846272" z="0.0"/>
  </node>
  <node id="24028" label="ENSMUSG00000026355" cy:nodeId="1502">
    <graphics y="238.30279081224387" x="24.444113521001782" z="0.0"/>
  </node>
  <node id="24027" label="ENSMUSG00000025747" cy:nodeId="1503">
    <graphics y="-183.3524978840452" x="-61.25291559276775" z="0.0"/>
  </node>
  <node id="24026" label="ENSMUSG00000025742" cy:nodeId="1504">
    <graphics y="281.82903592943137" x="-65.35289117870525" z="0.0"/>
  </node>
  <node id="24025" label="ENSMUSG00000025422" cy:nodeId="1505">
    <graphics y="412.29458158372825" x="-121.46955987987712" z="0.0"/>
  </node>
  <node id="24024" label="ENSMUSG00000025151" cy:nodeId="1506">
    <graphics y="-223.90834505201394" x="140.28540685596272" z="0.0"/>
  </node>
  <node id="24023" label="ENSMUSG00000024935" cy:nodeId="1507">
    <graphics y="-358.77020723463113" x="-87.32996484813884" z="0.0"/>
  </node>
  <node id="24022" label="ENSMUSG00000024827" cy:nodeId="1508">
    <graphics y="-307.60593111158425" x="2.0005557817439694" z="0.0"/>
  </node>
  <node id="24021" label="ENSMUSG00000024807" cy:nodeId="1509">
    <graphics y="273.862879923572" x="-0.05443689403728058" z="0.0"/>
  </node>
  <node id="24020" label="ENSMUSG00000024423" cy:nodeId="1510">
    <graphics y="142.5805312907595" x="-151.95182249126628" z="0.0"/>
  </node>
  <node id="24019" label="ENSMUSG00000024030" cy:nodeId="1511">
    <graphics y="-173.28456575513894" x="42.093237666509594" z="0.0"/>
  </node>
  <node id="24018" label="ENSMUSG00000024013" cy:nodeId="1512">
    <graphics y="220.36081998704856" x="37.04485204639241" z="0.0"/>
  </node>
  <node id="24017" label="ENSMUSG00000023393" cy:nodeId="1513">
    <graphics y="161.63015287279075" x="23.23273351611897" z="0.0"/>
  </node>
  <node id="24016" label="ENSMUSG00000022881" cy:nodeId="1514">
    <graphics y="-36.79441721082742" x="-359.15384790477947" z="0.0"/>
  </node>
  <node id="24015" label="ENSMUSG00000022840" cy:nodeId="1515">
    <graphics y="398.98443143724387" x="211.34894445361897" z="0.0"/>
  </node>
  <node id="24014" label="ENSMUSG00000022686" cy:nodeId="1516">
    <graphics y="-106.09491426588113" x="295.7807376665096" z="0.0"/>
  </node>
  <node id="24013" label="ENSMUSG00000022021" cy:nodeId="1517">
    <graphics y="184.99360196947043" x="-166.06313058910564" z="0.0"/>
  </node>
  <node id="24012" label="ENSMUSG00000021559" cy:nodeId="1518">
    <graphics y="155.77917020677512" x="173.69116857471272" z="0.0"/>
  </node>
  <node id="24011" label="ENSMUSG00000020641" cy:nodeId="1519">
    <graphics y="380.37807767747825" x="64.39632299365803" z="0.0"/>
  </node>
  <node id="24010" label="ENSMUSG00000020424" cy:nodeId="1520">
    <graphics y="-29.202843495617458" x="70.27846410693928" z="0.0"/>
  </node>
  <node id="24009" label="ENSMUSG00000020226" cy:nodeId="1521">
    <graphics y="-55.67868120313699" x="-41.960717411615406" z="0.0"/>
  </node>
  <node id="24008" label="ENSMUSG00000020182" cy:nodeId="1522">
    <graphics y="-70.28995973707254" x="146.52741125049397" z="0.0"/>
  </node>
  <node id="24007" label="ENSMUSG00000020135" cy:nodeId="1523">
    <graphics y="11.164406946887425" x="43.486059932134594" z="0.0"/>
  </node>
  <node id="24006" label="ENSMUSG00000020131" cy:nodeId="1524">
    <graphics y="31.947859934558323" x="-364.8521663862248" z="0.0"/>
  </node>
  <node id="24005" label="ENSMUSG00000019214" cy:nodeId="1525">
    <graphics y="45.50586240648215" x="-278.53655359325603" z="0.0"/>
  </node>
  <node id="24004" label="ENSMUSG00000019188" cy:nodeId="1526">
    <graphics y="-172.75363618970925" x="52.66626623096272" z="0.0"/>
  </node>
  <node id="24003" label="ENSMUSG00000018169" cy:nodeId="1527">
    <graphics y="268.95608060716575" x="-71.6306392866154" z="0.0"/>
  </node>
  <node id="24002" label="ENSMUSG00000013846" cy:nodeId="1528">
    <graphics y="177.936854532947" x="-119.2504131513615" z="0.0"/>
  </node>
  <node id="24001" label="ENSMUSG00000007989" cy:nodeId="1529">
    <graphics y="10.538476160754612" x="275.22260168018147" z="0.0"/>
  </node>
  <node id="24000" label="ENSMUSG00000006930" cy:nodeId="1530">
    <graphics y="-194.97327119947488" x="-40.84136316356853" z="0.0"/>
  </node>
  <node id="23999" label="ENSMUSG00000006575" cy:nodeId="1531">
    <graphics y="-72.84572298170144" x="59.15917089404866" z="0.0"/>
  </node>
  <node id="23998" label="ENSMUSG00000004951" cy:nodeId="1532">
    <graphics y="-86.01501161695535" x="103.72382238330647" z="0.0"/>
  </node>
  <node id="23997" label="ENSMUSG00000003436" cy:nodeId="1533">
    <graphics y="86.78190153001731" x="186.5104739946346" z="0.0"/>
  </node>
  <node id="23996" label="ENSMUSG00000003283" cy:nodeId="1534">
    <graphics y="254.161952189197" x="174.88040807666584" z="0.0"/>
  </node>
  <node id="23995" label="ENSMUSG00000001025" cy:nodeId="1535">
    <graphics y="-181.01303560377175" x="-183.0710155683537" z="0.0"/>
  </node>
  <node id="23994" label="ENSMUSG00000009248" cy:nodeId="1536">
    <graphics y="22.684306315173558" x="-19.77129480419353" z="0.0"/>
  </node>
  <node id="23993" label="ENSMUSG00000008398" cy:nodeId="1537">
    <graphics y="239.15932767747825" x="-272.644334049799" z="0.0"/>
  </node>
  <node id="23992" label="ENSMUSG00000074183" cy:nodeId="1538">
    <graphics y="267.98623197435325" x="45.845068721197094" z="0.0"/>
  </node>
  <node id="23991" label="ENSMUSG00000069814" cy:nodeId="1539">
    <graphics y="161.3359023845095" x="-136.81943437633709" z="0.0"/>
  </node>
  <node id="23990" label="ENSMUSG00000069227" cy:nodeId="1540">
    <graphics y="158.83701627611106" x="-316.7813656049748" z="0.0"/>
  </node>
  <node id="23989" label="ENSMUSG00000066152" cy:nodeId="1541">
    <graphics y="223.36585538743918" x="132.60193517627522" z="0.0"/>
  </node>
  <node id="23988" label="ENSMUSG00000054871" cy:nodeId="1542">
    <graphics y="29.99932401536887" x="193.38074377002522" z="0.0"/>
  </node>
  <node id="23987" label="ENSMUSG00000051498" cy:nodeId="1543">
    <graphics y="88.29917447923606" x="-375.4544460493107" z="0.0"/>
  </node>
  <node id="23986" label="ENSMUSG00000048534" cy:nodeId="1544">
    <graphics y="-85.30343324781472" x="64.52542760791584" z="0.0"/>
  </node>
  <node id="23985" label="ENSMUSG00000047415" cy:nodeId="1545">
    <graphics y="-353.41037447095925" x="-163.78905412731365" z="0.0"/>
  </node>
  <node id="23984" label="ENSMUSG00000046805" cy:nodeId="1546">
    <graphics y="-146.5547226154905" x="-99.53876993236736" z="0.0"/>
  </node>
  <node id="23983" label="ENSMUSG00000046460" cy:nodeId="1547">
    <graphics y="-188.33876497388894" x="227.6406009477596" z="0.0"/>
  </node>
  <node id="23982" label="ENSMUSG00000042686" cy:nodeId="1548">
    <graphics y="219.81518094896262" x="102.47293737354084" z="0.0"/>
  </node>
  <node id="23981" label="ENSMUSG00000042404" cy:nodeId="1549">
    <graphics y="22.926974467029027" x="-183.1993877607365" z="0.0"/>
  </node>
  <node id="23980" label="ENSMUSG00000040136" cy:nodeId="1550">
    <graphics y="271.4836379802126" x="-244.40686914501384" z="0.0"/>
  </node>
  <node id="23979" label="ENSMUSG00000037568" cy:nodeId="1551">
    <graphics y="-199.39796907545144" x="344.2696292680721" z="0.0"/>
  </node>
  <node id="23978" label="ENSMUSG00000032978" cy:nodeId="1552">
    <graphics y="221.6022598063845" x="-43.04246637401775" z="0.0"/>
  </node>
  <node id="23977" label="ENSMUSG00000028927" cy:nodeId="1553">
    <graphics y="-76.21349031568582" x="261.77167394580647" z="0.0"/>
  </node>
  <node id="23976" label="ENSMUSG00000025498" cy:nodeId="1554">
    <graphics y="-23.67374260068948" x="-39.71118280468181" z="0.0"/>
  </node>
  <node id="23975" label="ENSMUSG00000021194" cy:nodeId="1555">
    <graphics y="-56.82194978834207" x="108.82449987354084" z="0.0"/>
  </node>
  <node id="23974" label="ENSMUSG00000020894" cy:nodeId="1556">
    <graphics y="45.93220060228293" x="183.3212650102596" z="0.0"/>
  </node>
  <node id="23973" label="ENSMUSG00000020472" cy:nodeId="1557">
    <graphics y="-37.53725511671121" x="-9.037728520013843" z="0.0"/>
  </node>
  <node id="23972" label="ENSMUSG00000008193" cy:nodeId="1558">
    <graphics y="-77.63016969801004" x="-135.36842462597087" z="0.0"/>
  </node>
  <node id="23971" label="ENSMUSG00000023216" cy:nodeId="1559">
    <graphics y="-425.85956270338113" x="-490.10515710888103" z="0.0"/>
  </node>
  <node id="23970" label="ENSMUSG00000006362" cy:nodeId="1560">
    <graphics y="-468.54742431640625" x="-530.1372957622573" z="0.0"/>
  </node>
  <node id="23969" label="ENSMUSG00000042873" cy:nodeId="1561">
    <graphics y="5.795458964099339" x="189.7873294633846" z="0.0"/>
  </node>
  <node id="23968" label="ENSMUSG00000042115" cy:nodeId="1562">
    <graphics y="134.03032987474387" x="78.00610998096272" z="0.0"/>
  </node>
  <node id="23967" label="ENSMUSG00000041836" cy:nodeId="1563">
    <graphics y="68.904139689197" x="101.1873538774471" z="0.0"/>
  </node>
  <node id="23966" label="ENSMUSG00000041548" cy:nodeId="1564">
    <graphics y="-214.248936482678" x="-108.02553293285564" z="0.0"/>
  </node>
  <node id="23965" label="ENSMUSG00000026833" cy:nodeId="1565">
    <graphics y="-139.4475448811155" x="-27.010949345209156" z="0.0"/>
  </node>
  <node id="23964" label="ENSMUSG00000025969" cy:nodeId="1566">
    <graphics y="-157.02792818189675" x="145.34879186572834" z="0.0"/>
  </node>
  <node id="23963" label="ENSMUSG00000025938" cy:nodeId="1567">
    <graphics y="227.0190841472048" x="194.01871374072834" z="0.0"/>
  </node>
  <node id="23962" label="ENSMUSG00000021123" cy:nodeId="1568">
    <graphics y="-537.5987289631468" x="-50.22533533153728" z="0.0"/>
  </node>
  <node id="23961" label="ENSMUSG00000015401" cy:nodeId="1569">
    <graphics y="-130.05797273756082" x="162.67215612354084" z="0.0"/>
  </node>
  <node id="23960" label="ENSMUSG00000004099" cy:nodeId="1570">
    <graphics y="-37.33443147779519" x="-41.30637476024822" z="0.0"/>
  </node>
  <node id="23959" label="ENSMUSG00000094651" cy:nodeId="1571">
    <graphics y="-216.97710115552957" x="-442.4757320600529" z="0.0"/>
  </node>
  <node id="23958" label="ENSMUSG00000070532" cy:nodeId="1572">
    <graphics y="104.43323819993918" x="103.6558597368221" z="0.0"/>
  </node>
  <node id="23957" label="ENSMUSG00000070287" cy:nodeId="1573">
    <graphics y="-216.2344101154905" x="-267.8558513837834" z="0.0"/>
  </node>
  <node id="23956" label="ENSMUSG00000067925" cy:nodeId="1574">
    <graphics y="267.43777006029075" x="-166.98765871105388" z="0.0"/>
  </node>
  <node id="23955" label="ENSMUSG00000066952" cy:nodeId="1575">
    <graphics y="-63.62557680250222" x="268.02179601611897" z="0.0"/>
  </node>
  <node id="23954" label="ENSMUSG00000064090" cy:nodeId="1576">
    <graphics y="-150.7973221027952" x="-213.48778650341228" z="0.0"/>
  </node>
  <node id="23953" label="ENSMUSG00000062859" cy:nodeId="1577">
    <graphics y="-174.70851595045144" x="-95.48545572338298" z="0.0"/>
  </node>
  <node id="23952" label="ENSMUSG00000059991" cy:nodeId="1578">
    <graphics y="6.3060027873415265" x="14.698584346197094" z="0.0"/>
  </node>
  <node id="23951" label="ENSMUSG00000059742" cy:nodeId="1579">
    <graphics y="377.551600626697" x="-52.52701685009197" z="0.0"/>
  </node>
  <node id="23950" label="ENSMUSG00000058624" cy:nodeId="1580">
    <graphics y="135.02500455736106" x="38.14130285205647" z="0.0"/>
  </node>
  <node id="23949" label="ENSMUSG00000058297" cy:nodeId="1581">
    <graphics y="-260.36162263990457" x="-69.41362878856853" z="0.0"/>
  </node>
  <node id="23948" label="ENSMUSG00000056531" cy:nodeId="1582">
    <graphics y="-71.9137542927366" x="24.548270015142407" z="0.0"/>
  </node>
  <node id="23947" label="ENSMUSG00000056222" cy:nodeId="1583">
    <graphics y="-223.17116243482644" x="147.51819494190022" z="0.0"/>
  </node>
  <node id="23946" label="ENSMUSG00000053963" cy:nodeId="1584">
    <graphics y="-170.31561739088113" x="49.85437658252522" z="0.0"/>
  </node>
  <node id="23945" label="ENSMUSG00000053216" cy:nodeId="1585">
    <graphics y="-200.85341341138894" x="88.07198217334553" z="0.0"/>
  </node>
  <node id="23944" label="ENSMUSG00000051177" cy:nodeId="1586">
    <graphics y="-24.676798650036403" x="-196.18419000683025" z="0.0"/>
  </node>
  <node id="23943" label="ENSMUSG00000051166" cy:nodeId="1587">
    <graphics y="-27.019861527691432" x="185.0280521196346" z="0.0"/>
  </node>
  <node id="23942" label="ENSMUSG00000051111" cy:nodeId="1588">
    <graphics y="501.424647501697" x="-200.4281704145451" z="0.0"/>
  </node>
  <node id="23941" label="ENSMUSG00000049148" cy:nodeId="1589">
    <graphics y="-166.6852615559202" x="-402.7943050580998" z="0.0"/>
  </node>
  <node id="23940" label="ENSMUSG00000048970" cy:nodeId="1590">
    <graphics y="-198.33647615552957" x="-95.69356271801189" z="0.0"/>
  </node>
  <node id="23939" label="ENSMUSG00000047907" cy:nodeId="1591">
    <graphics y="271.01555936693137" x="166.92102697315022" z="0.0"/>
  </node>
  <node id="23938" label="ENSMUSG00000047298" cy:nodeId="1592">
    <graphics y="-99.46899873853738" x="-143.29703638134197" z="0.0"/>
  </node>
  <node id="23937" label="ENSMUSG00000046546" cy:nodeId="1593">
    <graphics y="-32.476005383740016" x="23.214575557134594" z="0.0"/>
  </node>
  <node id="23936" label="ENSMUSG00000046242" cy:nodeId="1594">
    <graphics y="142.60462491868918" x="-39.06092187938884" z="0.0"/>
  </node>
  <node id="23935" label="ENSMUSG00000045838" cy:nodeId="1595">
    <graphics y="54.51655118822043" x="107.86817052783772" z="0.0"/>
  </node>
  <node id="23934" label="ENSMUSG00000043639" cy:nodeId="1596">
    <graphics y="-186.009434529553" x="-34.91404077587322" z="0.0"/>
  </node>
  <node id="23933" label="ENSMUSG00000043068" cy:nodeId="1597">
    <graphics y="54.90177457689231" x="130.47815587940022" z="0.0"/>
  </node>
  <node id="23932" label="ENSMUSG00000042734" cy:nodeId="1598">
    <graphics y="-78.30379182935769" x="-253.74016687450603" z="0.0"/>
  </node>
  <node id="23931" label="ENSMUSG00000042429" cy:nodeId="1599">
    <graphics y="191.90906827806418" x="-10.887185307123218" z="0.0"/>
  </node>
  <node id="23930" label="ENSMUSG00000041633" cy:nodeId="1600">
    <graphics y="104.9003555095095" x="-74.4424068647404" z="0.0"/>
  </node>
  <node id="23929" label="ENSMUSG00000040852" cy:nodeId="1601">
    <graphics y="33.05083768724387" x="164.81128576221272" z="0.0"/>
  </node>
  <node id="23928" label="ENSMUSG00000039934" cy:nodeId="1602">
    <graphics y="-54.73125154615457" x="-185.59457704601482" z="0.0"/>
  </node>
  <node id="23927" label="ENSMUSG00000039372" cy:nodeId="1603">
    <graphics y="228.88125150560325" x="103.8532474321346" z="0.0"/>
  </node>
  <node id="23926" label="ENSMUSG00000038879" cy:nodeId="1604">
    <graphics y="-131.4526718342405" x="-315.05030176220134" z="0.0"/>
  </node>
  <node id="23925" label="ENSMUSG00000038456" cy:nodeId="1605">
    <graphics y="-56.26553041578347" x="-216.29820749340251" z="0.0"/>
  </node>
  <node id="23924" label="ENSMUSG00000038451" cy:nodeId="1606">
    <graphics y="-102.19505006910379" x="42.98590734424397" z="0.0"/>
  </node>
  <node id="23923" label="ENSMUSG00000038255" cy:nodeId="1607">
    <graphics y="5.594893625964573" x="-35.51664087352947" z="0.0"/>
  </node>
  <node id="23922" label="ENSMUSG00000037664" cy:nodeId="1608">
    <graphics y="113.13773649095481" x="-68.5591060834904" z="0.0"/>
  </node>
  <node id="23921" label="ENSMUSG00000037580" cy:nodeId="1609">
    <graphics y="73.53168790697043" x="74.0799320024471" z="0.0"/>
  </node>
  <node id="23920" label="ENSMUSG00000036913" cy:nodeId="1610">
    <graphics y="-208.02039034009988" x="-252.7489940839787" z="0.0"/>
  </node>
  <node id="23919" label="ENSMUSG00000035606" cy:nodeId="1611">
    <graphics y="-361.240879842053" x="-56.28453180370525" z="0.0"/>
  </node>
  <node id="23918" label="ENSMUSG00000035509" cy:nodeId="1612">
    <graphics y="398.62884061693137" x="64.46666601123616" z="0.0"/>
  </node>
  <node id="23917" label="ENSMUSG00000035357" cy:nodeId="1613">
    <graphics y="171.61921232103293" x="-209.4017040449162" z="0.0"/>
  </node>
  <node id="23916" label="ENSMUSG00000035279" cy:nodeId="1614">
    <graphics y="195.56757657884543" x="-302.6784450727482" z="0.0"/>
  </node>
  <node id="23915" label="ENSMUSG00000035226" cy:nodeId="1615">
    <graphics y="-119.86901552320535" x="18.989462642095532" z="0.0"/>
  </node>
  <node id="23914" label="ENSMUSG00000034774" cy:nodeId="1616">
    <graphics y="-298.01620943189675" x="-102.08884164867595" z="0.0"/>
  </node>
  <node id="23913" label="ENSMUSG00000034773" cy:nodeId="1617">
    <graphics y="86.95379178880637" x="22.440329341314282" z="0.0"/>
  </node>
  <node id="23912" label="ENSMUSG00000034579" cy:nodeId="1618">
    <graphics y="211.144374064197" x="54.26769140186116" z="0.0"/>
  </node>
  <node id="23911" label="ENSMUSG00000034275" cy:nodeId="1619">
    <graphics y="-195.5654648029905" x="-79.1230709272404" z="0.0"/>
  </node>
  <node id="23910" label="ENSMUSG00000033900" cy:nodeId="1620">
    <graphics y="26.394389322986058" x="82.65607335986897" z="0.0"/>
  </node>
  <node id="23909" label="ENSMUSG00000033740" cy:nodeId="1621">
    <graphics y="88.28660123704856" x="-141.8410303312321" z="0.0"/>
  </node>
  <node id="23908" label="ENSMUSG00000033307" cy:nodeId="1622">
    <graphics y="-194.5586746418577" x="-306.9179165082951" z="0.0"/>
  </node>
  <node id="23907" label="ENSMUSG00000033061" cy:nodeId="1623">
    <graphics y="-93.47053987623269" x="-254.9216320234318" z="0.0"/>
  </node>
  <node id="23906" label="ENSMUSG00000032548" cy:nodeId="1624">
    <graphics y="-13.90095789075906" x="99.67401769580647" z="0.0"/>
  </node>
  <node id="23905" label="ENSMUSG00000032297" cy:nodeId="1625">
    <graphics y="24.29470746873801" x="-251.575486393549" z="0.0"/>
  </node>
  <node id="23904" label="ENSMUSG00000032076" cy:nodeId="1626">
    <graphics y="117.36770170091575" x="-236.67898675975994" z="0.0"/>
  </node>
  <node id="23903" label="ENSMUSG00000031791" cy:nodeId="1627">
    <graphics y="151.97768705247825" x="29.761938838384594" z="0.0"/>
  </node>
  <node id="23902" label="ENSMUSG00000031788" cy:nodeId="1628">
    <graphics y="-244.09839326978738" x="139.30658605518147" z="0.0"/>
  </node>
  <node id="23901" label="ENSMUSG00000031760" cy:nodeId="1629">
    <graphics y="49.800074747790745" x="-283.7294399457951" z="0.0"/>
  </node>
  <node id="23900" label="ENSMUSG00000031757" cy:nodeId="1630">
    <graphics y="-76.89750368238504" x="-104.50377771434978" z="0.0"/>
  </node>
  <node id="23899" label="ENSMUSG00000030406" cy:nodeId="1631">
    <graphics y="307.09917753099387" x="-184.67428896007732" z="0.0"/>
  </node>
  <node id="23898" label="ENSMUSG00000030074" cy:nodeId="1632">
    <graphics y="-196.19214326978738" x="-63.77208826122478" z="0.0"/>
  </node>
  <node id="23897" label="ENSMUSG00000028843" cy:nodeId="1633">
    <graphics y="268.21584623216575" x="-449.50911829052166" z="0.0"/>
  </node>
  <node id="23896" label="ENSMUSG00000028186" cy:nodeId="1634">
    <graphics y="-169.48674471021707" x="-146.66549512920574" z="0.0"/>
  </node>
  <node id="23895" label="ENSMUSG00000027544" cy:nodeId="1635">
    <graphics y="0.14510076402609684" x="-14.160546513177906" z="0.0"/>
  </node>
  <node id="23894" label="ENSMUSG00000027273" cy:nodeId="1636">
    <graphics y="-95.80676729322488" x="-174.09070894298748" z="0.0"/>
  </node>
  <node id="23893" label="ENSMUSG00000027254" cy:nodeId="1637">
    <graphics y="71.76763456224387" x="149.5748050493221" z="0.0"/>
  </node>
  <node id="23892" label="ENSMUSG00000026961" cy:nodeId="1638">
    <graphics y="-411.8000839436155" x="-235.11912653026775" z="0.0"/>
  </node>
  <node id="23891" label="ENSMUSG00000026764" cy:nodeId="1639">
    <graphics y="-282.12619478345925" x="-131.2978222089787" z="0.0"/>
  </node>
  <node id="23890" label="ENSMUSG00000026443" cy:nodeId="1640">
    <graphics y="121.65737455247825" x="42.90895727100178" z="0.0"/>
  </node>
  <node id="23889" label="ENSMUSG00000026335" cy:nodeId="1641">
    <graphics y="281.90691678880637" x="48.35677221240803" z="0.0"/>
  </node>
  <node id="23888" label="ENSMUSG00000025551" cy:nodeId="1642">
    <graphics y="134.12572782396262" x="137.3024661821346" z="0.0"/>
  </node>
  <node id="23887" label="ENSMUSG00000025091" cy:nodeId="1643">
    <graphics y="279.40813749193137" x="315.49689367236897" z="0.0"/>
  </node>
  <node id="23886" label="ENSMUSG00000025064" cy:nodeId="1644">
    <graphics y="-158.82654268384988" x="-49.75084802684978" z="0.0"/>
  </node>
  <node id="23885" label="ENSMUSG00000024552" cy:nodeId="1645">
    <graphics y="-294.403233357678" x="105.38529088916584" z="0.0"/>
  </node>
  <node id="23884" label="ENSMUSG00000024033" cy:nodeId="1646">
    <graphics y="93.9447891032595" x="-63.94773218212322" z="0.0"/>
  </node>
  <node id="23883" label="ENSMUSG00000023913" cy:nodeId="1647">
    <graphics y="-162.62273103834207" x="-250.92762872753337" z="0.0"/>
  </node>
  <node id="23882" label="ENSMUSG00000022962" cy:nodeId="1648">
    <graphics y="260.64556424974387" x="-25.80461999950603" z="0.0"/>
  </node>
  <node id="23881" label="ENSMUSG00000022769" cy:nodeId="1649">
    <graphics y="-59.58839876295144" x="269.4303043169002" z="0.0"/>
  </node>
  <node id="23880" label="ENSMUSG00000022054" cy:nodeId="1650">
    <graphics y="-80.19920045972879" x="-386.3314144330998" z="0.0"/>
  </node>
  <node id="23879" label="ENSMUSG00000021999" cy:nodeId="1651">
    <graphics y="168.91950528978293" x="-219.6773807722111" z="0.0"/>
  </node>
  <node id="23878" label="ENSMUSG00000021846" cy:nodeId="1652">
    <graphics y="27.19686811326926" x="-131.96173212108806" z="0.0"/>
  </node>
  <node id="23877" label="ENSMUSG00000021337" cy:nodeId="1653">
    <graphics y="-4.2220218861203875" x="-313.6084682661076" z="0.0"/>
  </node>
  <node id="23876" label="ENSMUSG00000020808" cy:nodeId="1654">
    <graphics y="-160.66881258131082" x="47.43433263721272" z="0.0"/>
  </node>
  <node id="23875" label="ENSMUSG00000020303" cy:nodeId="1655">
    <graphics y="-76.1547096455198" x="-256.7967464643498" z="0.0"/>
  </node>
  <node id="23874" label="ENSMUSG00000020121" cy:nodeId="1656">
    <graphics y="-30.093525716076442" x="195.4927737993221" z="0.0"/>
  </node>
  <node id="23873" label="ENSMUSG00000019761" cy:nodeId="1657">
    <graphics y="-202.273838826428" x="300.00678136768147" z="0.0"/>
  </node>
  <node id="23872" label="ENSMUSG00000017652" cy:nodeId="1658">
    <graphics y="128.13479154466575" x="-113.11492273388103" z="0.0"/>
  </node>
  <node id="23871" label="ENSMUSG00000014351" cy:nodeId="1659">
    <graphics y="60.17233579515403" x="216.31256750049397" z="0.0"/>
  </node>
  <node id="23870" label="ENSMUSG00000014164" cy:nodeId="1660">
    <graphics y="267.93743436693137" x="-311.6378872114201" z="0.0"/>
  </node>
  <node id="23869" label="ENSMUSG00000010830" cy:nodeId="1661">
    <graphics y="-108.34843141676004" x="-302.7378627973576" z="0.0"/>
  </node>
  <node id="23868" label="ENSMUSG00000010505" cy:nodeId="1662">
    <graphics y="-75.19411165357644" x="108.85358312549397" z="0.0"/>
  </node>
  <node id="23867" label="ENSMUSG00000006435" cy:nodeId="1663">
    <graphics y="-239.8606308186155" x="-31.5760967451115" z="0.0"/>
  </node>
  <node id="23866" label="ENSMUSG00000005360" cy:nodeId="1664">
    <graphics y="-78.02267915845925" x="-264.5664760786076" z="0.0"/>
  </node>
  <node id="23865" label="ENSMUSG00000004366" cy:nodeId="1665">
    <graphics y="19.753714731921605" x="207.48511388721272" z="0.0"/>
  </node>
  <node id="23864" label="ENSMUSG00000004113" cy:nodeId="1666">
    <graphics y="-303.7371872150999" x="-104.02972528515056" z="0.0"/>
  </node>
  <node id="23863" label="ENSMUSG00000000560" cy:nodeId="1667">
    <graphics y="-142.44212801099832" x="-82.41820642528728" z="0.0"/>
  </node>
  <node id="23862" label="ENSMUSG00000000394" cy:nodeId="1668">
    <graphics y="30.33782499193137" x="112.24524572315022" z="0.0"/>
  </node>
  <node id="23861" label="ENSMUSG00000000126" cy:nodeId="1669">
    <graphics y="56.78162687181418" x="-57.77219507274822" z="0.0"/>
  </node>
  <node id="23860" label="ENSMUSG00000038793" cy:nodeId="1670">
    <graphics y="73.06312864183371" x="499.8529117387752" z="0.0"/>
  </node>
  <node id="23859" label="ENSMUSG00000021835" cy:nodeId="1671">
    <graphics y="-187.6836746418577" x="-124.34200403270916" z="0.0"/>
  </node>
  <node id="23858" label="ENSMUSG00000001819" cy:nodeId="1672">
    <graphics y="-232.63937837720925" x="158.96338537158772" z="0.0"/>
  </node>
  <node id="23857" label="ENSMUSG00000019846" cy:nodeId="1673">
    <graphics y="345.41250150560325" x="-109.72358820018962" z="0.0"/>
  </node>
  <node id="23856" label="ENSMUSG00000001517" cy:nodeId="1674">
    <graphics y="-238.294346638928" x="-363.01790735302166" z="0.0"/>
  </node>
  <node id="23855" label="ENSMUSG00000000214" cy:nodeId="1675">
    <graphics y="356.295252970447" x="-122.19573328075603" z="0.0"/>
  </node>
  <node id="23854" label="ENSMUSG00000000942" cy:nodeId="1676">
    <graphics y="455.49029081224387" x="-648.5690548139592" z="0.0"/>
  </node>
  <node id="23853" label="ENSMUSG00000110206" cy:nodeId="1677">
    <graphics y="174.6072189128298" x="-67.9214565473576" z="0.0"/>
  </node>
  <node id="23852" label="ENSMUSG00000110105" cy:nodeId="1678">
    <graphics y="-141.10250551343972" x="19.926382808111157" z="0.0"/>
  </node>
  <node id="23851" label="ENSMUSG00000108348" cy:nodeId="1679">
    <graphics y="-77.68223268629129" x="-205.1221630292912" z="0.0"/>
  </node>
  <node id="23850" label="ENSMUSG00000096847" cy:nodeId="1680">
    <graphics y="255.802821329822" x="-212.812302799799" z="0.0"/>
  </node>
  <node id="23849" label="ENSMUSG00000094928" cy:nodeId="1681">
    <graphics y="-147.61941225172097" x="-198.78714105663494" z="0.0"/>
  </node>
  <node id="23848" label="ENSMUSG00000087651" cy:nodeId="1682">
    <graphics y="221.76391141771262" x="-224.77958032665447" z="0.0"/>
  </node>
  <node id="23847" label="ENSMUSG00000079553" cy:nodeId="1683">
    <graphics y="-268.6168258869749" x="-129.57503625927166" z="0.0"/>
  </node>
  <node id="23846" label="ENSMUSG00000079339" cy:nodeId="1684">
    <graphics y="-184.75438387037332" x="-21.646615238763843" z="0.0"/>
  </node>
  <node id="23845" label="ENSMUSG00000079037" cy:nodeId="1685">
    <graphics y="-94.70802003980691" x="-57.8785869794865" z="0.0"/>
  </node>
  <node id="23844" label="ENSMUSG00000078773" cy:nodeId="1686">
    <graphics y="-45.56625444532449" x="29.681372432134594" z="0.0"/>
  </node>
  <node id="23843" label="ENSMUSG00000078650" cy:nodeId="1687">
    <graphics y="290.44936673997825" x="-80.3270504194279" z="0.0"/>
  </node>
  <node id="23842" label="ENSMUSG00000078612" cy:nodeId="1688">
    <graphics y="-225.8938339436155" x="178.51196935596272" z="0.0"/>
  </node>
  <node id="23841" label="ENSMUSG00000078202" cy:nodeId="1689">
    <graphics y="2.034474543322972" x="166.87085607471272" z="0.0"/>
  </node>
  <node id="23840" label="ENSMUSG00000075543" cy:nodeId="1690">
    <graphics y="-24.191666432629177" x="-505.6799251752873" z="0.0"/>
  </node>
  <node id="23839" label="ENSMUSG00000075502" cy:nodeId="1691">
    <graphics y="-86.86237794996316" x="11.362143306158032" z="0.0"/>
  </node>
  <node id="23838" label="ENSMUSG00000074892" cy:nodeId="1692">
    <graphics y="-254.16293794752175" x="-142.23618623790935" z="0.0"/>
  </node>
  <node id="23837" label="ENSMUSG00000074802" cy:nodeId="1693">
    <graphics y="-197.73007661939675" x="-10.06774255809978" z="0.0"/>
  </node>
  <node id="23836" label="ENSMUSG00000074785" cy:nodeId="1694">
    <graphics y="-192.47015840650613" x="-130.1847221570988" z="0.0"/>
  </node>
  <node id="23835" label="ENSMUSG00000074715" cy:nodeId="1695">
    <graphics y="202.2131759440798" x="-45.80740472850994" z="0.0"/>
  </node>
  <node id="23834" label="ENSMUSG00000074604" cy:nodeId="1696">
    <graphics y="186.339442423572" x="-137.6877853590031" z="0.0"/>
  </node>
  <node id="23833" label="ENSMUSG00000074476" cy:nodeId="1697">
    <graphics y="-103.00608522535379" x="-54.862687321283374" z="0.0"/>
  </node>
  <node id="23832" label="ENSMUSG00000074217" cy:nodeId="1698">
    <graphics y="-227.627354451428" x="136.32190587940022" z="0.0"/>
  </node>
  <node id="23831" label="ENSMUSG00000074063" cy:nodeId="1699">
    <graphics y="14.004309824695042" x="-227.70826837597087" z="0.0"/>
  </node>
  <node id="23830" label="ENSMUSG00000073409" cy:nodeId="1700">
    <graphics y="-156.59142000318582" x="34.86286046924397" z="0.0"/>
  </node>
  <node id="23829" label="ENSMUSG00000072235" cy:nodeId="1701">
    <graphics y="-59.12385255933816" x="5.368323115728344" z="0.0"/>
  </node>
  <node id="23828" label="ENSMUSG00000072115" cy:nodeId="1702">
    <graphics y="-7.696239300976345" x="120.19428136768147" z="0.0"/>
  </node>
  <node id="23827" label="ENSMUSG00000071547" cy:nodeId="1703">
    <graphics y="-135.27028352857644" x="87.3179691118221" z="0.0"/>
  </node>
  <node id="23826" label="ENSMUSG00000070802" cy:nodeId="1704">
    <graphics y="137.4594375407595" x="-145.0332901197453" z="0.0"/>
  </node>
  <node id="23825" label="ENSMUSG00000070733" cy:nodeId="1705">
    <graphics y="432.1439163005251" x="103.70551183643147" z="0.0"/>
  </node>
  <node id="23824" label="ENSMUSG00000070576" cy:nodeId="1706">
    <graphics y="-67.78397447706277" x="-47.19815179882244" z="0.0"/>
  </node>
  <node id="23823" label="ENSMUSG00000070498" cy:nodeId="1707">
    <graphics y="-115.01138002515847" x="170.00745275440022" z="0.0"/>
  </node>
  <node id="23822" label="ENSMUSG00000070284" cy:nodeId="1708">
    <graphics y="323.6043655192751" x="-62.97813531933025" z="0.0"/>
  </node>
  <node id="23821" label="ENSMUSG00000069910" cy:nodeId="1709">
    <graphics y="201.03832548021262" x="-241.55124780712322" z="0.0"/>
  </node>
  <node id="23820" label="ENSMUSG00000067813" cy:nodeId="1710">
    <graphics y="35.0980865275759" x="-364.53121301708416" z="0.0"/>
  </node>
  <node id="23819" label="ENSMUSG00000064262" cy:nodeId="1711">
    <graphics y="212.2016250407595" x="-229.91857263622478" z="0.0"/>
  </node>
  <node id="23818" label="ENSMUSG00000064215" cy:nodeId="1712">
    <graphics y="-180.90846712232644" x="25.16870763721272" z="0.0"/>
  </node>
  <node id="23817" label="ENSMUSG00000062760" cy:nodeId="1713">
    <graphics y="25.81746595262473" x="-193.96833536205486" z="0.0"/>
  </node>
  <node id="23816" label="ENSMUSG00000062248" cy:nodeId="1714">
    <graphics y="-80.76245576978738" x="7.948370723150219" z="0.0"/>
  </node>
  <node id="23815" label="ENSMUSG00000062175" cy:nodeId="1715">
    <graphics y="396.088221720447" x="281.24176671924397" z="0.0"/>
  </node>
  <node id="23814" label="ENSMUSG00000062070" cy:nodeId="1716">
    <graphics y="-120.01174623609597" x="-101.20626947460369" z="0.0"/>
  </node>
  <node id="23813" label="ENSMUSG00000061718" cy:nodeId="1717">
    <graphics y="152.2148086345095" x="-51.29096338329509" z="0.0"/>
  </node>
  <node id="23812" label="ENSMUSG00000061607" cy:nodeId="1718">
    <graphics y="-61.88506395460183" x="-64.99639246044353" z="0.0"/>
  </node>
  <node id="23811" label="ENSMUSG00000061414" cy:nodeId="1719">
    <graphics y="141.0837814128298" x="227.0821292680721" z="0.0"/>
  </node>
  <node id="23810" label="ENSMUSG00000060550" cy:nodeId="1720">
    <graphics y="8.116187266101292" x="79.71449926318928" z="0.0"/>
  </node>
  <node id="23809" label="ENSMUSG00000060063" cy:nodeId="1721">
    <graphics y="24.86461942552512" x="-170.7413742261906" z="0.0"/>
  </node>
  <node id="23808" label="ENSMUSG00000059939" cy:nodeId="1722">
    <graphics y="178.44260709642356" x="-131.58617326793865" z="0.0"/>
  </node>
  <node id="23807" label="ENSMUSG00000059713" cy:nodeId="1723">
    <graphics y="-38.341954060803005" x="161.88916662158772" z="0.0"/>
  </node>
  <node id="23806" label="ENSMUSG00000059336" cy:nodeId="1724">
    <graphics y="279.1093398845095" x="-243.69007227001384" z="0.0"/>
  </node>
  <node id="23805" label="ENSMUSG00000059013" cy:nodeId="1725">
    <graphics y="10.256640604724339" x="153.50690343799397" z="0.0"/>
  </node>
  <node id="23804" label="ENSMUSG00000058975" cy:nodeId="1726">
    <graphics y="66.66152494310325" x="125.07379796924397" z="0.0"/>
  </node>
  <node id="23803" label="ENSMUSG00000058799" cy:nodeId="1727">
    <graphics y="-151.78558809400613" x="-216.7142574506779" z="0.0"/>
  </node>
  <node id="23802" label="ENSMUSG00000058290" cy:nodeId="1728">
    <graphics y="-116.71689302564675" x="195.51080968799397" z="0.0"/>
  </node>
  <node id="23801" label="ENSMUSG00000058145" cy:nodeId="1729">
    <graphics y="72.762293986072" x="-54.61790582714275" z="0.0"/>
  </node>
  <node id="23800" label="ENSMUSG00000058135" cy:nodeId="1730">
    <graphics y="-161.6310623371702" x="-117.9262058454533" z="0.0"/>
  </node>
  <node id="23799" label="ENSMUSG00000058006" cy:nodeId="1731">
    <graphics y="204.78440397142356" x="242.27210119190022" z="0.0"/>
  </node>
  <node id="23798" label="ENSMUSG00000057335" cy:nodeId="1732">
    <graphics y="-55.175083943615505" x="383.63519933643147" z="0.0"/>
  </node>
  <node id="23797" label="ENSMUSG00000057137" cy:nodeId="1733">
    <graphics y="-175.83086092115457" x="-147.12620660839275" z="0.0"/>
  </node>
  <node id="23796" label="ENSMUSG00000057069" cy:nodeId="1734">
    <graphics y="-305.0867965900999" x="76.83838537158772" z="0.0"/>
  </node>
  <node id="23795" label="ENSMUSG00000056888" cy:nodeId="1735">
    <graphics y="194.96607511400168" x="90.69193151416584" z="0.0"/>
  </node>
  <node id="23794" label="ENSMUSG00000056602" cy:nodeId="1736">
    <graphics y="234.82006376146262" x="-113.52717325267986" z="0.0"/>
  </node>
  <node id="23793" label="ENSMUSG00000056185" cy:nodeId="1737">
    <graphics y="-151.62988741041238" x="-321.8579036909123" z="0.0"/>
  </node>
  <node id="23792" label="ENSMUSG00000056069" cy:nodeId="1738">
    <graphics y="-191.80650789381082" x="14.860373286626782" z="0.0"/>
  </node>
  <node id="23791" label="ENSMUSG00000055805" cy:nodeId="1739">
    <graphics y="-37.917372533093044" x="-160.81679842052654" z="0.0"/>
  </node>
  <node id="23790" label="ENSMUSG00000055612" cy:nodeId="1740">
    <graphics y="134.09324186204856" x="-19.78466150341228" z="0.0"/>
  </node>
  <node id="23789" label="ENSMUSG00000055296" cy:nodeId="1741">
    <graphics y="-260.84503633619363" x="186.6811282915096" z="0.0"/>
  </node>
  <node id="23788" label="ENSMUSG00000054920" cy:nodeId="1742">
    <graphics y="168.67115323900168" x="144.6390140336971" z="0.0"/>
  </node>
  <node id="23787" label="ENSMUSG00000054893" cy:nodeId="1743">
    <graphics y="191.61834257005637" x="-165.27607461986736" z="0.0"/>
  </node>
  <node id="23786" label="ENSMUSG00000054717" cy:nodeId="1744">
    <graphics y="-29.985012837658473" x="-265.6429683881779" z="0.0"/>
  </node>
  <node id="23785" label="ENSMUSG00000054612" cy:nodeId="1745">
    <graphics y="122.87279813646262" x="-170.00214120922283" z="0.0"/>
  </node>
  <node id="23784" label="ENSMUSG00000054342" cy:nodeId="1746">
    <graphics y="138.12380521654075" x="-282.3456814008732" z="0.0"/>
  </node>
  <node id="23783" label="ENSMUSG00000054321" cy:nodeId="1747">
    <graphics y="-52.80749971509988" x="90.84802892627522" z="0.0"/>
  </node>
  <node id="23782" label="ENSMUSG00000053581" cy:nodeId="1748">
    <graphics y="-159.83812410474832" x="-75.12925836620525" z="0.0"/>
  </node>
  <node id="23781" label="ENSMUSG00000053580" cy:nodeId="1749">
    <graphics y="-107.42329103590066" x="261.0026920122127" z="0.0"/>
  </node>
  <node id="23780" label="ENSMUSG00000053460" cy:nodeId="1750">
    <graphics y="-225.49957735181863" x="95.52985265674397" z="0.0"/>
  </node>
  <node id="23779" label="ENSMUSG00000053414" cy:nodeId="1751">
    <graphics y="5.0174190318483625" x="-301.4103023725529" z="0.0"/>
  </node>
  <node id="23778" label="ENSMUSG00000053334" cy:nodeId="1752">
    <graphics y="-87.43642122388894" x="64.29210546436116" z="0.0"/>
  </node>
  <node id="23777" label="ENSMUSG00000053137" cy:nodeId="1753">
    <graphics y="-437.75339204908425" x="-146.72212907848552" z="0.0"/>
  </node>
  <node id="23776" label="ENSMUSG00000052384" cy:nodeId="1754">
    <graphics y="135.12824552415793" x="-147.674607487299" z="0.0"/>
  </node>
  <node id="23775" label="ENSMUSG00000052331" cy:nodeId="1755">
    <graphics y="143.87058561204856" x="231.03775670947834" z="0.0"/>
  </node>
  <node id="23774" label="ENSMUSG00000052135" cy:nodeId="1756">
    <graphics y="-62.27047426343972" x="-93.0587398725529" z="0.0"/>
  </node>
  <node id="23773" label="ENSMUSG00000052117" cy:nodeId="1757">
    <graphics y="79.10770719407981" x="135.69641759815022" z="0.0"/>
  </node>
  <node id="23772" label="ENSMUSG00000052087" cy:nodeId="1758">
    <graphics y="-128.7447632038694" x="-340.7434780317326" z="0.0"/>
  </node>
  <node id="23771" label="ENSMUSG00000052085" cy:nodeId="1759">
    <graphics y="9.17919462083762" x="-230.09241602001384" z="0.0"/>
  </node>
  <node id="23770" label="ENSMUSG00000051457" cy:nodeId="1760">
    <graphics y="92.13046567796653" x="172.4444339555721" z="0.0"/>
  </node>
  <node id="23769" label="ENSMUSG00000051335" cy:nodeId="1761">
    <graphics y="-175.30395967603738" x="-24.568185062982593" z="0.0"/>
  </node>
  <node id="23768" label="ENSMUSG00000051278" cy:nodeId="1762">
    <graphics y="67.1032363688845" x="-605.6326229291935" z="0.0"/>
  </node>
  <node id="23767" label="ENSMUSG00000051220" cy:nodeId="1763">
    <graphics y="74.06698911546653" x="-76.97466394481853" z="0.0"/>
  </node>
  <node id="23766" label="ENSMUSG00000050357" cy:nodeId="1764">
    <graphics y="-32.964857884655544" x="-401.54529687938884" z="0.0"/>
  </node>
  <node id="23765" label="ENSMUSG00000050335" cy:nodeId="1765">
    <graphics y="236.45531766771262" x="-80.80502435741619" z="0.0"/>
  </node>
  <node id="23764" label="ENSMUSG00000050132" cy:nodeId="1766">
    <graphics y="-133.44507295728738" x="51.820471553228344" z="0.0"/>
  </node>
  <node id="23763" label="ENSMUSG00000050052" cy:nodeId="1767">
    <graphics y="367.2311965739626" x="-269.48145410595134" z="0.0"/>
  </node>
  <node id="23762" label="ENSMUSG00000049907" cy:nodeId="1768">
    <graphics y="-199.42516023756082" x="51.52339818897053" z="0.0"/>
  </node>
  <node id="23761" label="ENSMUSG00000049892" cy:nodeId="1769">
    <graphics y="164.041102579822" x="146.68665197315022" z="0.0"/>
  </node>
  <node id="23760" label="ENSMUSG00000049350" cy:nodeId="1770">
    <graphics y="-134.902012654553" x="258.35260656299397" z="0.0"/>
  </node>
  <node id="23759" label="ENSMUSG00000049288" cy:nodeId="1771">
    <graphics y="-88.32613832593972" x="34.33016088428303" z="0.0"/>
  </node>
  <node id="23758" label="ENSMUSG00000048965" cy:nodeId="1772">
    <graphics y="225.83843534349387" x="-140.35197946605876" z="0.0"/>
  </node>
  <node id="23757" label="ENSMUSG00000048779" cy:nodeId="1773">
    <graphics y="231.960292032947" x="-385.1375667768498" z="0.0"/>
  </node>
  <node id="23756" label="ENSMUSG00000048473" cy:nodeId="1774">
    <graphics y="246.23708646654075" x="333.56619909229084" z="0.0"/>
  </node>
  <node id="23755" label="ENSMUSG00000048450" cy:nodeId="1775">
    <graphics y="12.721057108630589" x="-90.05306360302166" z="0.0"/>
  </node>
  <node id="23754" label="ENSMUSG00000048148" cy:nodeId="1776">
    <graphics y="-114.28120882154519" x="-126.81872865734294" z="0.0"/>
  </node>
  <node id="23753" label="ENSMUSG00000048058" cy:nodeId="1777">
    <graphics y="45.20873563646262" x="219.83710363330647" z="0.0"/>
  </node>
  <node id="23752" label="ENSMUSG00000047986" cy:nodeId="1778">
    <graphics y="195.1863204753298" x="-28.076317997552906" z="0.0"/>
  </node>
  <node id="23751" label="ENSMUSG00000047867" cy:nodeId="1779">
    <graphics y="-234.26422578931863" x="170.86884191455647" z="0.0"/>
  </node>
  <node id="23750" label="ENSMUSG00000047842" cy:nodeId="1780">
    <graphics y="154.27585904954856" x="-183.75510141430095" z="0.0"/>
  </node>
  <node id="23749" label="ENSMUSG00000047757" cy:nodeId="1781">
    <graphics y="95.05846708177512" x="-324.9455501752873" z="0.0"/>
  </node>
  <node id="23748" label="ENSMUSG00000047642" cy:nodeId="1782">
    <graphics y="-111.19243318677957" x="97.70479467334553" z="0.0"/>
  </node>
  <node id="23747" label="ENSMUSG00000047534" cy:nodeId="1783">
    <graphics y="-47.41289217115457" x="164.76257970752522" z="0.0"/>
  </node>
  <node id="23746" label="ENSMUSG00000047507" cy:nodeId="1784">
    <graphics y="6.12618177293723" x="188.36969640674397" z="0.0"/>
  </node>
  <node id="23745" label="ENSMUSG00000047501" cy:nodeId="1785">
    <graphics y="-77.05978853345925" x="-154.91726085720256" z="0.0"/>
  </node>
  <node id="23744" label="ENSMUSG00000047221" cy:nodeId="1786">
    <graphics y="-155.92322237134988" x="-39.26201746044353" z="0.0"/>
  </node>
  <node id="23743" label="ENSMUSG00000047205" cy:nodeId="1787">
    <graphics y="104.81679075120871" x="218.27152135791584" z="0.0"/>
  </node>
  <node id="23742" label="ENSMUSG00000047115" cy:nodeId="1788">
    <graphics y="-85.16121370435769" x="-300.85030481395916" z="0.0"/>
  </node>
  <node id="23741" label="ENSMUSG00000047109" cy:nodeId="1789">
    <graphics y="228.46068876146262" x="-122.16256067333416" z="0.0"/>
  </node>
  <node id="23740" label="ENSMUSG00000047044" cy:nodeId="1790">
    <graphics y="30.577174357165745" x="36.93903234424397" z="0.0"/>
  </node>
  <node id="23739" label="ENSMUSG00000047003" cy:nodeId="1791">
    <graphics y="-110.84733278394754" x="-66.64062616405681" z="0.0"/>
  </node>
  <node id="23738" label="ENSMUSG00000046668" cy:nodeId="1792">
    <graphics y="-115.065586873303" x="191.89990880908772" z="0.0"/>
  </node>
  <node id="23737" label="ENSMUSG00000046591" cy:nodeId="1793">
    <graphics y="136.12160795091575" x="-139.90379259166912" z="0.0"/>
  </node>
  <node id="23736" label="ENSMUSG00000046447" cy:nodeId="1794">
    <graphics y="200.59472196458762" x="-111.68367883739666" z="0.0"/>
  </node>
  <node id="23735" label="ENSMUSG00000046223" cy:nodeId="1795">
    <graphics y="224.59180753587668" x="-139.18225977001384" z="0.0"/>
  </node>
  <node id="23734" label="ENSMUSG00000045932" cy:nodeId="1796">
    <graphics y="-196.66534883619363" x="-228.36660883007244" z="0.0"/>
  </node>
  <node id="23733" label="ENSMUSG00000045349" cy:nodeId="1797">
    <graphics y="57.91897886156028" x="376.5832584184627" z="0.0"/>
  </node>
  <node id="23732" label="ENSMUSG00000045165" cy:nodeId="1798">
    <graphics y="148.20237272142356" x="71.17688634815022" z="0.0"/>
  </node>
  <node id="23731" label="ENSMUSG00000044966" cy:nodeId="1799">
    <graphics y="-93.92722017408425" x="-496.05159875927166" z="0.0"/>
  </node>
  <node id="23730" label="ENSMUSG00000044548" cy:nodeId="1800">
    <graphics y="273.86358182786887" x="14.819617061040844" z="0.0"/>
  </node>
  <node id="23729" label="ENSMUSG00000044348" cy:nodeId="1801">
    <graphics y="-180.18642122388894" x="133.65259435596272" z="0.0"/>
  </node>
  <node id="23728" label="ENSMUSG00000044201" cy:nodeId="1802">
    <graphics y="-275.65813142896707" x="213.85193517627522" z="0.0"/>
  </node>
  <node id="23727" label="ENSMUSG00000044177" cy:nodeId="1803">
    <graphics y="188.5282851970095" x="-192.4737560468693" z="0.0"/>
  </node>
  <node id="23726" label="ENSMUSG00000044066" cy:nodeId="1804">
    <graphics y="-130.67209322095925" x="-202.91444513378337" z="0.0"/>
  </node>
  <node id="23725" label="ENSMUSG00000044005" cy:nodeId="1805">
    <graphics y="36.601012400378636" x="-66.95762750683025" z="0.0"/>
  </node>
  <node id="23724" label="ENSMUSG00000043439" cy:nodeId="1806">
    <graphics y="-103.2588241779905" x="-42.164208622552906" z="0.0"/>
  </node>
  <node id="23723" label="ENSMUSG00000043154" cy:nodeId="1807">
    <graphics y="-68.10099107862527" x="-184.5561763959904" z="0.0"/>
  </node>
  <node id="23722" label="ENSMUSG00000043088" cy:nodeId="1808">
    <graphics y="197.34832303880637" x="-176.87827989635662" z="0.0"/>
  </node>
  <node id="23721" label="ENSMUSG00000043004" cy:nodeId="1809">
    <graphics y="198.04767911790793" x="-178.88537332592205" z="0.0"/>
  </node>
  <node id="23720" label="ENSMUSG00000042985" cy:nodeId="1810">
    <graphics y="289.4279739177126" x="-171.13875791607097" z="0.0"/>
  </node>
  <node id="23719" label="ENSMUSG00000042684" cy:nodeId="1811">
    <graphics y="23.82592313646262" x="296.0543277544002" z="0.0"/>
  </node>
  <node id="23718" label="ENSMUSG00000042489" cy:nodeId="1812">
    <graphics y="128.9756271159548" x="210.70166662158772" z="0.0"/>
  </node>
  <node id="23717" label="ENSMUSG00000042462" cy:nodeId="1813">
    <graphics y="116.03965299486106" x="59.64195897998616" z="0.0"/>
  </node>
  <node id="23716" label="ENSMUSG00000042213" cy:nodeId="1814">
    <graphics y="-431.586338826428" x="120.62421300830647" z="0.0"/>
  </node>
  <node id="23715" label="ENSMUSG00000042029" cy:nodeId="1815">
    <graphics y="121.89930265306418" x="-74.33995935497478" z="0.0"/>
  </node>
  <node id="23714" label="ENSMUSG00000041498" cy:nodeId="1816">
    <graphics y="106.4291412150759" x="-8.261742802240406" z="0.0"/>
  </node>
  <node id="23713" label="ENSMUSG00000041293" cy:nodeId="1817">
    <graphics y="171.32429044603293" x="98.20450475635334" z="0.0"/>
  </node>
  <node id="23712" label="ENSMUSG00000041117" cy:nodeId="1818">
    <graphics y="83.17934720872825" x="-182.48221704540447" z="0.0"/>
  </node>
  <node id="23711" label="ENSMUSG00000041075" cy:nodeId="1819">
    <graphics y="43.76634519456809" x="-86.54786798534587" z="0.0"/>
  </node>
  <node id="23710" label="ENSMUSG00000041064" cy:nodeId="1820">
    <graphics y="-7.55565530897195" x="-19.24175378856853" z="0.0"/>
  </node>
  <node id="23709" label="ENSMUSG00000040918" cy:nodeId="1821">
    <graphics y="131.14385526536887" x="160.97534826221272" z="0.0"/>
  </node>
  <node id="23708" label="ENSMUSG00000040860" cy:nodeId="1822">
    <graphics y="-15.622475930462429" x="191.14307287158772" z="0.0"/>
  </node>
  <node id="23707" label="ENSMUSG00000040856" cy:nodeId="1823">
    <graphics y="-212.02771455884988" x="138.20352819385334" z="0.0"/>
  </node>
  <node id="23706" label="ENSMUSG00000040723" cy:nodeId="1824">
    <graphics y="-10.231166669140407" x="-169.29713365612224" z="0.0"/>
  </node>
  <node id="23705" label="ENSMUSG00000040710" cy:nodeId="1825">
    <graphics y="-39.9043548786741" x="290.1230533403377" z="0.0"/>
  </node>
  <node id="23704" label="ENSMUSG00000040495" cy:nodeId="1826">
    <graphics y="173.20771329759543" x="-37.482194157220874" z="0.0"/>
  </node>
  <node id="23703" label="ENSMUSG00000040483" cy:nodeId="1827">
    <graphics y="-44.03733904005105" x="-125.82688829479412" z="0.0"/>
  </node>
  <node id="23702" label="ENSMUSG00000040462" cy:nodeId="1828">
    <graphics y="-93.40351564527566" x="25.749197749517407" z="0.0"/>
  </node>
  <node id="23701" label="ENSMUSG00000040339" cy:nodeId="1829">
    <graphics y="-37.09690744520242" x="-174.8481571393986" z="0.0"/>
  </node>
  <node id="23700" label="ENSMUSG00000040276" cy:nodeId="1830">
    <graphics y="143.11176603197043" x="-64.39682123241619" z="0.0"/>
  </node>
  <node id="23699" label="ENSMUSG00000040209" cy:nodeId="1831">
    <graphics y="66.56922452806418" x="100.86139562549397" z="0.0"/>
  </node>
  <node id="23698" label="ENSMUSG00000040084" cy:nodeId="1832">
    <graphics y="-248.28587801099832" x="182.35709264697834" z="0.0"/>
  </node>
  <node id="23697" label="ENSMUSG00000040061" cy:nodeId="1833">
    <graphics y="-121.52460176588113" x="201.28018835010334" z="0.0"/>
  </node>
  <node id="23696" label="ENSMUSG00000039982" cy:nodeId="1834">
    <graphics y="151.05739896654075" x="99.46967199268147" z="0.0"/>
  </node>
  <node id="23695" label="ENSMUSG00000039814" cy:nodeId="1835">
    <graphics y="360.46538846849387" x="141.84815099658772" z="0.0"/>
  </node>
  <node id="23694" label="ENSMUSG00000039774" cy:nodeId="1836">
    <graphics y="-292.715977498303" x="-278.51302454052166" z="0.0"/>
  </node>
  <node id="23693" label="ENSMUSG00000039683" cy:nodeId="1837">
    <graphics y="48.59832303880637" x="-114.73775980053142" z="0.0"/>
  </node>
  <node id="23692" label="ENSMUSG00000039621" cy:nodeId="1838">
    <graphics y="29.03676526903098" x="245.20462682666584" z="0.0"/>
  </node>
  <node id="23691" label="ENSMUSG00000039530" cy:nodeId="1839">
    <graphics y="89.41182248948996" x="4.409369258306469" z="0.0"/>
  </node>
  <node id="23690" label="ENSMUSG00000039384" cy:nodeId="1840">
    <graphics y="41.043299845446995" x="111.7660892290096" z="0.0"/>
  </node>
  <node id="23689" label="ENSMUSG00000039270" cy:nodeId="1841">
    <graphics y="-96.5569198811155" x="-228.23713800487712" z="0.0"/>
  </node>
  <node id="23688" label="ENSMUSG00000039234" cy:nodeId="1842">
    <graphics y="66.02256315111106" x="-169.40220949230388" z="0.0"/>
  </node>
  <node id="23687" label="ENSMUSG00000039168" cy:nodeId="1843">
    <graphics y="-114.7426117146116" x="36.132178096197094" z="0.0"/>
  </node>
  <node id="23686" label="ENSMUSG00000039158" cy:nodeId="1844">
    <graphics y="-60.487862416515895" x="71.1418979448299" z="0.0"/>
  </node>
  <node id="23685" label="ENSMUSG00000039157" cy:nodeId="1845">
    <graphics y="404.634364298572" x="-163.64070865688518" z="0.0"/>
  </node>
  <node id="23684" label="ENSMUSG00000039145" cy:nodeId="1846">
    <graphics y="223.76064603685325" x="-123.59012720165447" z="0.0"/>
  </node>
  <node id="23683" label="ENSMUSG00000039126" cy:nodeId="1847">
    <graphics y="-211.13121492506082" x="-74.69702264843181" z="0.0"/>
  </node>
  <node id="23682" label="ENSMUSG00000039115" cy:nodeId="1848">
    <graphics y="118.13262479661887" x="-191.81953165111736" z="0.0"/>
  </node>
  <node id="23681" label="ENSMUSG00000039059" cy:nodeId="1849">
    <graphics y="314.00213163255637" x="-266.8469249921818" z="0.0"/>
  </node>
  <node id="23680" label="ENSMUSG00000039050" cy:nodeId="1850">
    <graphics y="-110.76044160963113" x="-88.13194391308025" z="0.0"/>
  </node>
  <node id="23679" label="ENSMUSG00000038836" cy:nodeId="1851">
    <graphics y="-70.38626176954324" x="8.137503413579907" z="0.0"/>
  </node>
  <node id="23678" label="ENSMUSG00000038644" cy:nodeId="1852">
    <graphics y="-137.29106599927957" x="265.15106847705647" z="0.0"/>
  </node>
  <node id="23677" label="ENSMUSG00000038578" cy:nodeId="1853">
    <graphics y="-51.33144456983621" x="-171.2042877393742" z="0.0"/>
  </node>
  <node id="23676" label="ENSMUSG00000038497" cy:nodeId="1854">
    <graphics y="575.1787368571657" x="326.89874914111897" z="0.0"/>
  </node>
  <node id="23675" label="ENSMUSG00000038379" cy:nodeId="1855">
    <graphics y="-25.770922490368434" x="102.5417239946346" z="0.0"/>
  </node>
  <node id="23674" label="ENSMUSG00000038354" cy:nodeId="1856">
    <graphics y="44.523577860583714" x="-305.8718044477482" z="0.0"/>
  </node>
  <node id="23673" label="ENSMUSG00000038319" cy:nodeId="1857">
    <graphics y="114.3610488688845" x="25.451834468267407" z="0.0"/>
  </node>
  <node id="23672" label="ENSMUSG00000038241" cy:nodeId="1858">
    <graphics y="-56.082135030041286" x="140.12055089893147" z="0.0"/>
  </node>
  <node id="23671" label="ENSMUSG00000038175" cy:nodeId="1859">
    <graphics y="214.2075607097048" x="59.54649999561116" z="0.0"/>
  </node>
  <node id="23670" label="ENSMUSG00000038068" cy:nodeId="1860">
    <graphics y="234.04157560228293" x="-82.1172573286076" z="0.0"/>
  </node>
  <node id="23669" label="ENSMUSG00000038039" cy:nodeId="1861">
    <graphics y="65.78544156907981" x="146.38001134815022" z="0.0"/>
  </node>
  <node id="23668" label="ENSMUSG00000038005" cy:nodeId="1862">
    <graphics y="20.7709495341677" x="-312.5464870649357" z="0.0"/>
  </node>
  <node id="23667" label="ENSMUSG00000037846" cy:nodeId="1863">
    <graphics y="161.62482755540793" x="356.86493566455647" z="0.0"/>
  </node>
  <node id="23666" label="ENSMUSG00000037820" cy:nodeId="1864">
    <graphics y="144.1845351970095" x="-275.6183025556584" z="0.0"/>
  </node>
  <node id="23665" label="ENSMUSG00000037643" cy:nodeId="1865">
    <graphics y="-190.42516023756082" x="-104.23032495556072" z="0.0"/>
  </node>
  <node id="23664" label="ENSMUSG00000037628" cy:nodeId="1866">
    <graphics y="-16.461334058056423" x="-1.0970089155216556" z="0.0"/>
  </node>
  <node id="23663" label="ENSMUSG00000037606" cy:nodeId="1867">
    <graphics y="84.16080015062278" x="-144.69972059307293" z="0.0"/>
  </node>
  <node id="23662" label="ENSMUSG00000037579" cy:nodeId="1868">
    <graphics y="-92.44099123121316" x="25.484656123540844" z="0.0"/>
  </node>
  <node id="23661" label="ENSMUSG00000037447" cy:nodeId="1869">
    <graphics y="74.72454374193137" x="-73.30059167919353" z="0.0"/>
  </node>
  <node id="23660" label="ENSMUSG00000037428" cy:nodeId="1870">
    <graphics y="15.786418131579808" x="65.57295873584553" z="0.0"/>
  </node>
  <node id="23659" label="ENSMUSG00000037306" cy:nodeId="1871">
    <graphics y="49.362208536853245" x="108.06546667041584" z="0.0"/>
  </node>
  <node id="23658" label="ENSMUSG00000037235" cy:nodeId="1872">
    <graphics y="-171.402745076428" x="69.74979284229084" z="0.0"/>
  </node>
  <node id="23657" label="ENSMUSG00000037159" cy:nodeId="1873">
    <graphics y="-43.48029787183816" x="-219.618211002924" z="0.0"/>
  </node>
  <node id="23656" label="ENSMUSG00000037005" cy:nodeId="1874">
    <graphics y="239.78893583177512" x="189.42114904346272" z="0.0"/>
  </node>
  <node id="23655" label="ENSMUSG00000036875" cy:nodeId="1875">
    <graphics y="-44.72832185865457" x="445.2177799028377" z="0.0"/>
  </node>
  <node id="23654" label="ENSMUSG00000036863" cy:nodeId="1876">
    <graphics y="-238.40997774244363" x="-260.0225612836857" z="0.0"/>
  </node>
  <node id="23653" label="ENSMUSG00000036526" cy:nodeId="1877">
    <graphics y="49.87951200365012" x="233.24832799854084" z="0.0"/>
  </node>
  <node id="23652" label="ENSMUSG00000036368" cy:nodeId="1878">
    <graphics y="228.8392745768923" x="-77.53611871776775" z="0.0"/>
  </node>
  <node id="23651" label="ENSMUSG00000036306" cy:nodeId="1879">
    <graphics y="-249.200108357678" x="86.66419103565022" z="0.0"/>
  </node>
  <node id="23650" label="ENSMUSG00000036256" cy:nodeId="1880">
    <graphics y="372.08425443529075" x="-176.3656360822697" z="0.0"/>
  </node>
  <node id="23649" label="ENSMUSG00000036181" cy:nodeId="1881">
    <graphics y="8.897914103259495" x="-182.03530427990154" z="0.0"/>
  </node>
  <node id="23648" label="ENSMUSG00000036022" cy:nodeId="1882">
    <graphics y="-61.904095479260036" x="-259.9019252973576" z="0.0"/>
  </node>
  <node id="23647" label="ENSMUSG00000035901" cy:nodeId="1883">
    <graphics y="43.08200757860129" x="313.0223148149471" z="0.0"/>
  </node>
  <node id="23646" label="ENSMUSG00000035847" cy:nodeId="1884">
    <graphics y="196.60627286790793" x="12.155142573736157" z="0.0"/>
  </node>
  <node id="23645" label="ENSMUSG00000035722" cy:nodeId="1885">
    <graphics y="-62.00134737134988" x="-161.38013431606487" z="0.0"/>
  </node>
  <node id="23644" label="ENSMUSG00000035486" cy:nodeId="1886">
    <graphics y="285.74648588060325" x="30.21124914111897" z="0.0"/>
  </node>
  <node id="23643" label="ENSMUSG00000035455" cy:nodeId="1887">
    <graphics y="-31.409655400524684" x="122.3311527055721" z="0.0"/>
  </node>
  <node id="23642" label="ENSMUSG00000035273" cy:nodeId="1888">
    <graphics y="173.38047330736106" x="-101.3716518598576" z="0.0"/>
  </node>
  <node id="23641" label="ENSMUSG00000034883" cy:nodeId="1889">
    <graphics y="78.23192136644309" x="-124.11711999950603" z="0.0"/>
  </node>
  <node id="23640" label="ENSMUSG00000034858" cy:nodeId="1890">
    <graphics y="159.85955350755637" x="109.76251867236897" z="0.0"/>
  </node>
  <node id="23639" label="ENSMUSG00000034825" cy:nodeId="1891">
    <graphics y="-285.9800155842405" x="-66.89186212597087" z="0.0"/>
  </node>
  <node id="23638" label="ENSMUSG00000034758" cy:nodeId="1892">
    <graphics y="30.801097086657933" x="21.02912023486897" z="0.0"/>
  </node>
  <node id="23637" label="ENSMUSG00000034586" cy:nodeId="1893">
    <graphics y="118.75059049486106" x="-290.01226160106853" z="0.0"/>
  </node>
  <node id="23636" label="ENSMUSG00000034317" cy:nodeId="1894">
    <graphics y="-182.40102083326394" x="1.292715815923657" z="0.0"/>
  </node>
  <node id="23635" label="ENSMUSG00000034265" cy:nodeId="1895">
    <graphics y="117.12745206712668" x="-26.639855595209156" z="0.0"/>
  </node>
  <node id="23634" label="ENSMUSG00000034226" cy:nodeId="1896">
    <graphics y="-185.12675935865457" x="52.44762304248616" z="0.0"/>
  </node>
  <node id="23633" label="ENSMUSG00000034177" cy:nodeId="1897">
    <graphics y="-267.89255220533425" x="-224.4218761640568" z="0.0"/>
  </node>
  <node id="23632" label="ENSMUSG00000034164" cy:nodeId="1898">
    <graphics y="1.0588313853639875" x="273.9744632524471" z="0.0"/>
  </node>
  <node id="23631" label="ENSMUSG00000034116" cy:nodeId="1899">
    <graphics y="87.6535064494509" x="-182.20142480907634" z="0.0"/>
  </node>
  <node id="23630" label="ENSMUSG00000033952" cy:nodeId="1900">
    <graphics y="-81.65585405469949" x="-139.04887697277263" z="0.0"/>
  </node>
  <node id="23629" label="ENSMUSG00000033917" cy:nodeId="1901">
    <graphics y="-32.405756779919216" x="48.35524633350178" z="0.0"/>
  </node>
  <node id="23628" label="ENSMUSG00000033906" cy:nodeId="1902">
    <graphics y="407.62151639818137" x="65.91446569385334" z="0.0"/>
  </node>
  <node id="23627" label="ENSMUSG00000033530" cy:nodeId="1903">
    <graphics y="-81.53705293775613" x="-152.91879007396892" z="0.0"/>
  </node>
  <node id="23626" label="ENSMUSG00000033287" cy:nodeId="1904">
    <graphics y="-63.21322710157449" x="-122.29673883495525" z="0.0"/>
  </node>
  <node id="23625" label="ENSMUSG00000033147" cy:nodeId="1905">
    <graphics y="6.435647181262425" x="119.82807043018147" z="0.0"/>
  </node>
  <node id="23624" label="ENSMUSG00000032965" cy:nodeId="1906">
    <graphics y="-128.34177095533425" x="155.69269445361897" z="0.0"/>
  </node>
  <node id="23623" label="ENSMUSG00000032932" cy:nodeId="1907">
    <graphics y="-155.57811433912332" x="-12.64544031200603" z="0.0"/>
  </node>
  <node id="23622" label="ENSMUSG00000032902" cy:nodeId="1908">
    <graphics y="207.19617765306418" x="230.75983312549397" z="0.0"/>
  </node>
  <node id="23621" label="ENSMUSG00000032783" cy:nodeId="1909">
    <graphics y="-43.80285341383035" x="175.8812015336971" z="0.0"/>
  </node>
  <node id="23620" label="ENSMUSG00000032776" cy:nodeId="1910">
    <graphics y="-93.88432008863504" x="-243.58370325145916" z="0.0"/>
  </node>
  <node id="23619" label="ENSMUSG00000032769" cy:nodeId="1911">
    <graphics y="-128.81557161451394" x="2.3451602739314694" z="0.0"/>
  </node>
  <node id="23618" label="ENSMUSG00000032656" cy:nodeId="1912">
    <graphics y="24.289462259997777" x="-220.3921825605412" z="0.0"/>
  </node>
  <node id="23617" label="ENSMUSG00000032640" cy:nodeId="1913">
    <graphics y="-122.29349977613504" x="150.19904210986897" z="0.0"/>
  </node>
  <node id="23616" label="ENSMUSG00000032555" cy:nodeId="1914">
    <graphics y="68.55701749681418" x="-55.670060368158374" z="0.0"/>
  </node>
  <node id="23615" label="ENSMUSG00000032531" cy:nodeId="1915">
    <graphics y="-152.00766451002175" x="-85.69884607372478" z="0.0"/>
  </node>
  <node id="23614" label="ENSMUSG00000032373" cy:nodeId="1916">
    <graphics y="270.45913236497825" x="40.931799678228344" z="0.0"/>
  </node>
  <node id="23613" label="ENSMUSG00000032353" cy:nodeId="1917">
    <graphics y="-106.83665926099832" x="-352.04541894970134" z="0.0"/>
  </node>
  <node id="23612" label="ENSMUSG00000032350" cy:nodeId="1918">
    <graphics y="129.89240568040793" x="126.89313390674397" z="0.0"/>
  </node>
  <node id="23611" label="ENSMUSG00000032344" cy:nodeId="1919">
    <graphics y="-160.78334505201394" x="-70.21958276806072" z="0.0"/>
  </node>
  <node id="23610" label="ENSMUSG00000032322" cy:nodeId="1920">
    <graphics y="52.37826841234153" x="-174.78243944225505" z="0.0"/>
  </node>
  <node id="23609" label="ENSMUSG00000032254" cy:nodeId="1921">
    <graphics y="190.79226224779075" x="-208.00246927318767" z="0.0"/>
  </node>
  <node id="23608" label="ENSMUSG00000032226" cy:nodeId="1922">
    <graphics y="188.61123197435325" x="30.772543696783032" z="0.0"/>
  </node>
  <node id="23607" label="ENSMUSG00000032218" cy:nodeId="1923">
    <graphics y="-127.64154512525613" x="74.5715091508846" z="0.0"/>
  </node>
  <node id="23606" label="ENSMUSG00000032202" cy:nodeId="1924">
    <graphics y="-374.72089082838113" x="42.83649328174397" z="0.0"/>
  </node>
  <node id="23605" label="ENSMUSG00000031987" cy:nodeId="1925">
    <graphics y="-62.568211385021755" x="-214.14187357006267" z="0.0"/>
  </node>
  <node id="23604" label="ENSMUSG00000031903" cy:nodeId="1926">
    <graphics y="1.2770225322145734" x="-105.46102258739666" z="0.0"/>
  </node>
  <node id="23603" label="ENSMUSG00000031881" cy:nodeId="1927">
    <graphics y="521.7270767009157" x="-29.741006107904468" z="0.0"/>
  </node>
  <node id="23602" label="ENSMUSG00000031668" cy:nodeId="1928">
    <graphics y="77.27398221849387" x="79.19185522022053" z="0.0"/>
  </node>
  <node id="23601" label="ENSMUSG00000031629" cy:nodeId="1929">
    <graphics y="141.90526883958762" x="-139.3733665662785" z="0.0"/>
  </node>
  <node id="23600" label="ENSMUSG00000031617" cy:nodeId="1930">
    <graphics y="-276.9346969807249" x="0.8019626420955319" z="0.0"/>
  </node>
  <node id="23599" label="ENSMUSG00000031453" cy:nodeId="1931">
    <graphics y="21.334880045642308" x="49.77193334522053" z="0.0"/>
  </node>
  <node id="23598" label="ENSMUSG00000031367" cy:nodeId="1932">
    <graphics y="-53.98525697828347" x="-6.335869999506031" z="0.0"/>
  </node>
  <node id="23597" label="ENSMUSG00000031129" cy:nodeId="1933">
    <graphics y="-57.23034364820535" x="285.8241031450252" z="0.0"/>
  </node>
  <node id="23596" label="ENSMUSG00000031004" cy:nodeId="1934">
    <graphics y="-76.62086565137918" x="61.36037328662678" z="0.0"/>
  </node>
  <node id="23595" label="ENSMUSG00000030830" cy:nodeId="1935">
    <graphics y="-238.18993074537332" x="-295.09441492138103" z="0.0"/>
  </node>
  <node id="23594" label="ENSMUSG00000030671" cy:nodeId="1936">
    <graphics y="-199.08563692213113" x="209.40607335986897" z="0.0"/>
  </node>
  <node id="23593" label="ENSMUSG00000030643" cy:nodeId="1937">
    <graphics y="38.10827939866965" x="440.29315832080647" z="0.0"/>
  </node>
  <node id="23592" label="ENSMUSG00000030528" cy:nodeId="1938">
    <graphics y="205.29151456712668" x="-395.92192956981853" z="0.0"/>
  </node>
  <node id="23591" label="ENSMUSG00000030407" cy:nodeId="1939">
    <graphics y="397.578944376697" x="-166.16171190319255" z="0.0"/>
  </node>
  <node id="23590" label="ENSMUSG00000030346" cy:nodeId="1940">
    <graphics y="214.8425704753298" x="-178.61373636303142" z="0.0"/>
  </node>
  <node id="23589" label="ENSMUSG00000030275" cy:nodeId="1941">
    <graphics y="-35.99922639967019" x="206.73181798877522" z="0.0"/>
  </node>
  <node id="23588" label="ENSMUSG00000030199" cy:nodeId="1942">
    <graphics y="29.1834136760134" x="-0.3366329389591556" z="0.0"/>
  </node>
  <node id="23587" label="ENSMUSG00000030107" cy:nodeId="1943">
    <graphics y="-136.1071594441038" x="269.39517858447834" z="0.0"/>
  </node>
  <node id="23586" label="ENSMUSG00000030029" cy:nodeId="1944">
    <graphics y="-102.00255281568582" x="65.0195071977596" z="0.0"/>
  </node>
  <node id="23585" label="ENSMUSG00000029910" cy:nodeId="1945">
    <graphics y="192.90493314622825" x="-186.54134294567302" z="0.0"/>
  </node>
  <node id="23584" label="ENSMUSG00000029875" cy:nodeId="1946">
    <graphics y="-152.33752901197488" x="-109.71498224315837" z="0.0"/>
  </node>
  <node id="23583" label="ENSMUSG00000029847" cy:nodeId="1947">
    <graphics y="-212.96326143384988" x="-100.28668329296306" z="0.0"/>
  </node>
  <node id="23582" label="ENSMUSG00000029828" cy:nodeId="1948">
    <graphics y="33.12751310228293" x="-380.42789575634197" z="0.0"/>
  </node>
  <node id="23581" label="ENSMUSG00000029650" cy:nodeId="1949">
    <graphics y="45.61741178392356" x="-248.86800500927166" z="0.0"/>
  </node>
  <node id="23580" label="ENSMUSG00000029630" cy:nodeId="1950">
    <graphics y="-46.90550691724832" x="-90.09617731151775" z="0.0"/>
  </node>
  <node id="23579" label="ENSMUSG00000029601" cy:nodeId="1951">
    <graphics y="-153.53732759595925" x="-47.64386102733806" z="0.0"/>
  </node>
  <node id="23578" label="ENSMUSG00000029516" cy:nodeId="1952">
    <graphics y="-6.821831532726833" x="121.90943029346272" z="0.0"/>
  </node>
  <node id="23577" label="ENSMUSG00000029470" cy:nodeId="1953">
    <graphics y="-25.637629338512966" x="292.04193761768147" z="0.0"/>
  </node>
  <node id="23576" label="ENSMUSG00000029414" cy:nodeId="1954">
    <graphics y="47.94080655931418" x="295.16922643604084" z="0.0"/>
  </node>
  <node id="23575" label="ENSMUSG00000029408" cy:nodeId="1955">
    <graphics y="-140.08491212965066" x="-38.76824304638103" z="0.0"/>
  </node>
  <node id="23574" label="ENSMUSG00000029343" cy:nodeId="1956">
    <graphics y="-39.70042497755105" x="284.5029361528377" z="0.0"/>
  </node>
  <node id="23573" label="ENSMUSG00000029312" cy:nodeId="1957">
    <graphics y="-10.77850801588113" x="-155.20279142437175" z="0.0"/>
  </node>
  <node id="23572" label="ENSMUSG00000029185" cy:nodeId="1958">
    <graphics y="68.75239103197043" x="0.9338138383845944" z="0.0"/>
  </node>
  <node id="23571" label="ENSMUSG00000029166" cy:nodeId="1959">
    <graphics y="-334.42584688306863" x="75.7858188432674" z="0.0"/>
  </node>
  <node id="23570" label="ENSMUSG00000029163" cy:nodeId="1960">
    <graphics y="-161.6333358967405" x="-169.02611467418865" z="0.0"/>
  </node>
  <node id="23569" label="ENSMUSG00000028909" cy:nodeId="1961">
    <graphics y="-97.94664461256082" x="-135.42753336010173" z="0.0"/>
  </node>
  <node id="23568" label="ENSMUSG00000028874" cy:nodeId="1962">
    <graphics y="165.91750638841575" x="-305.9583675580998" z="0.0"/>
  </node>
  <node id="23567" label="ENSMUSG00000028832" cy:nodeId="1963">
    <graphics y="-63.152081319103786" x="271.1698062700252" z="0.0"/>
  </node>
  <node id="23566" label="ENSMUSG00000028718" cy:nodeId="1964">
    <graphics y="168.33751981615012" x="196.5450198930721" z="0.0"/>
  </node>
  <node id="23565" label="ENSMUSG00000028702" cy:nodeId="1965">
    <graphics y="-133.52443391920144" x="120.18225744190022" z="0.0"/>
  </node>
  <node id="23564" label="ENSMUSG00000028699" cy:nodeId="1966">
    <graphics y="119.57574003099387" x="51.16332128467366" z="0.0"/>
  </node>
  <node id="23563" label="ENSMUSG00000028678" cy:nodeId="1967">
    <graphics y="10.7752162730593" x="-450.7811214643498" z="0.0"/>
  </node>
  <node id="23562" label="ENSMUSG00000028641" cy:nodeId="1968">
    <graphics y="-609.160801717053" x="-16.25805017528728" z="0.0"/>
  </node>
  <node id="23561" label="ENSMUSG00000028634" cy:nodeId="1969">
    <graphics y="91.44668882249778" x="48.61664464893147" z="0.0"/>
  </node>
  <node id="23560" label="ENSMUSG00000028633" cy:nodeId="1970">
    <graphics y="144.31821744798606" x="115.4704349321346" z="0.0"/>
  </node>
  <node id="23559" label="ENSMUSG00000028614" cy:nodeId="1971">
    <graphics y="142.96975248216575" x="-115.33780023632244" z="0.0"/>
  </node>
  <node id="23558" label="ENSMUSG00000028602" cy:nodeId="1972">
    <graphics y="147.441493204822" x="-123.03099557934001" z="0.0"/>
  </node>
  <node id="23557" label="ENSMUSG00000028581" cy:nodeId="1973">
    <graphics y="132.560389689197" x="230.30847814502522" z="0.0"/>
  </node>
  <node id="23556" label="ENSMUSG00000028560" cy:nodeId="1974">
    <graphics y="25.274882487048558" x="61.57599523486897" z="0.0"/>
  </node>
  <node id="23555" label="ENSMUSG00000028439" cy:nodeId="1975">
    <graphics y="-226.15659029127175" x="31.23810460986897" z="0.0"/>
  </node>
  <node id="23554" label="ENSMUSG00000028341" cy:nodeId="1976">
    <graphics y="130.2320968425173" x="78.48209264697834" z="0.0"/>
  </node>
  <node id="23553" label="ENSMUSG00000028312" cy:nodeId="1977">
    <graphics y="-310.82895357252175" x="146.75427892627522" z="0.0"/>
  </node>
  <node id="23552" label="ENSMUSG00000028282" cy:nodeId="1978">
    <graphics y="-149.33844453931863" x="-245.2425548749943" z="0.0"/>
  </node>
  <node id="23551" label="ENSMUSG00000028212" cy:nodeId="1979">
    <graphics y="-206.30571443677957" x="123.48908117236897" z="0.0"/>
  </node>
  <node id="23550" label="ENSMUSG00000027994" cy:nodeId="1980">
    <graphics y="-220.22008211256082" x="-227.70496484813884" z="0.0"/>
  </node>
  <node id="23549" label="ENSMUSG00000027878" cy:nodeId="1981">
    <graphics y="125.18694608568137" x="-66.11974451122478" z="0.0"/>
  </node>
  <node id="23548" label="ENSMUSG00000027834" cy:nodeId="1982">
    <graphics y="-161.11269075513894" x="56.14014318408772" z="0.0"/>
  </node>
  <node id="23547" label="ENSMUSG00000027763" cy:nodeId="1983">
    <graphics y="-11.990065404186794" x="-129.05606767711834" z="0.0"/>
  </node>
  <node id="23546" label="ENSMUSG00000027752" cy:nodeId="1984">
    <graphics y="265.9482375895876" x="-443.40264246044353" z="0.0"/>
  </node>
  <node id="23545" label="ENSMUSG00000027654" cy:nodeId="1985">
    <graphics y="220.7279922282595" x="-156.32249567089275" z="0.0"/>
  </node>
  <node id="23544" label="ENSMUSG00000027611" cy:nodeId="1986">
    <graphics y="92.04699247240012" x="-144.1929475980778" z="0.0"/>
  </node>
  <node id="23543" label="ENSMUSG00000027533" cy:nodeId="1987">
    <graphics y="12.322425059070042" x="-108.69893762645916" z="0.0"/>
  </node>
  <node id="23542" label="ENSMUSG00000027514" cy:nodeId="1988">
    <graphics y="-35.24912626386697" x="265.1492679399471" z="0.0"/>
  </node>
  <node id="23541" label="ENSMUSG00000027513" cy:nodeId="1989">
    <graphics y="-138.48099977613504" x="-358.62066003856853" z="0.0"/>
  </node>
  <node id="23540" label="ENSMUSG00000027469" cy:nodeId="1990">
    <graphics y="-176.85301668287332" x="111.77542760791584" z="0.0"/>
  </node>
  <node id="23539" label="ENSMUSG00000027454" cy:nodeId="1991">
    <graphics y="84.1986953532595" x="-66.54776117382244" z="0.0"/>
  </node>
  <node id="23538" label="ENSMUSG00000027326" cy:nodeId="1992">
    <graphics y="-31.37268526197488" x="77.91101720752522" z="0.0"/>
  </node>
  <node id="23537" label="ENSMUSG00000027249" cy:nodeId="1993">
    <graphics y="265.2541152751345" x="-108.1232387739201" z="0.0"/>
  </node>
  <node id="23536" label="ENSMUSG00000027242" cy:nodeId="1994">
    <graphics y="-113.76884157301004" x="486.5086734575252" z="0.0"/>
  </node>
  <node id="23535" label="ENSMUSG00000027230" cy:nodeId="1995">
    <graphics y="211.22964017747825" x="155.84589269580647" z="0.0"/>
  </node>
  <node id="23534" label="ENSMUSG00000027075" cy:nodeId="1996">
    <graphics y="125.02897184251731" x="86.2105472368221" z="0.0"/>
  </node>
  <node id="23533" label="ENSMUSG00000027009" cy:nodeId="1997">
    <graphics y="77.90463559984153" x="223.5264652055721" z="0.0"/>
  </node>
  <node id="23532" label="ENSMUSG00000027006" cy:nodeId="1998">
    <graphics y="117.91057889818137" x="69.40346410693928" z="0.0"/>
  </node>
  <node id="23531" label="ENSMUSG00000026921" cy:nodeId="1999">
    <graphics y="187.5260879313845" x="-151.73922082958416" z="0.0"/>
  </node>
  <node id="23530" label="ENSMUSG00000026879" cy:nodeId="2000">
    <graphics y="332.52712552904075" x="236.24823644580647" z="0.0"/>
  </node>
  <node id="23529" label="ENSMUSG00000026786" cy:nodeId="2001">
    <graphics y="20.276873759021214" x="247.67471960010334" z="0.0"/>
  </node>
  <node id="23528" label="ENSMUSG00000026785" cy:nodeId="2002">
    <graphics y="110.8783828532595" x="194.09387853565022" z="0.0"/>
  </node>
  <node id="23527" label="ENSMUSG00000026779" cy:nodeId="2003">
    <graphics y="462.56057279466575" x="-85.08241388378337" z="0.0"/>
  </node>
  <node id="23526" label="ENSMUSG00000026728" cy:nodeId="2004">
    <graphics y="82.49011533616965" x="-264.3199474531193" z="0.0"/>
  </node>
  <node id="23525" label="ENSMUSG00000026683" cy:nodeId="2005">
    <graphics y="-170.94836885572488" x="167.62821081104084" z="0.0"/>
  </node>
  <node id="23524" label="ENSMUSG00000026605" cy:nodeId="2006">
    <graphics y="145.99865262865012" x="144.48389318408772" z="0.0"/>
  </node>
  <node id="23523" label="ENSMUSG00000026546" cy:nodeId="2007">
    <graphics y="-157.1247909748655" x="-198.2357761579533" z="0.0"/>
  </node>
  <node id="23522" label="ENSMUSG00000026509" cy:nodeId="2008">
    <graphics y="119.24331205247825" x="171.5423343461971" z="0.0"/>
  </node>
  <node id="23521" label="ENSMUSG00000026504" cy:nodeId="2009">
    <graphics y="123.82242887376731" x="191.27918127002522" z="0.0"/>
  </node>
  <node id="23520" label="ENSMUSG00000026429" cy:nodeId="2010">
    <graphics y="-201.20993501783425" x="-7.703103275873218" z="0.0"/>
  </node>
  <node id="23519" label="ENSMUSG00000026360" cy:nodeId="2011">
    <graphics y="64.16945951341575" x="202.33182409229084" z="0.0"/>
  </node>
  <node id="23518" label="ENSMUSG00000026281" cy:nodeId="2012">
    <graphics y="56.187037638415745" x="-21.45909997997478" z="0.0"/>
  </node>
  <node id="23517" label="ENSMUSG00000026196" cy:nodeId="2013">
    <graphics y="125.19916837572043" x="-338.89568445263103" z="0.0"/>
  </node>
  <node id="23516" label="ENSMUSG00000025912" cy:nodeId="2014">
    <graphics y="-2.0314796650510516" x="-35.16582605419353" z="0.0"/>
  </node>
  <node id="23515" label="ENSMUSG00000025758" cy:nodeId="2015">
    <graphics y="-145.9468124592405" x="-190.07679864940837" z="0.0"/>
  </node>
  <node id="23514" label="ENSMUSG00000025584" cy:nodeId="2016">
    <graphics y="12.435782603015355" x="-155.51181528148845" z="0.0"/>
  </node>
  <node id="23513" label="ENSMUSG00000025576" cy:nodeId="2017">
    <graphics y="-106.74929506422097" x="-114.31798288402751" z="0.0"/>
  </node>
  <node id="23512" label="ENSMUSG00000025352" cy:nodeId="2018">
    <graphics y="-37.84972841383035" x="-12.766259403802906" z="0.0"/>
  </node>
  <node id="23511" label="ENSMUSG00000025351" cy:nodeId="2019">
    <graphics y="149.18322294115012" x="12.951147822759594" z="0.0"/>
  </node>
  <node id="23510" label="ENSMUSG00000025154" cy:nodeId="2020">
    <graphics y="-5.962146588574001" x="116.05545690479084" z="0.0"/>
  </node>
  <node id="23509" label="ENSMUSG00000025019" cy:nodeId="2021">
    <graphics y="221.561610392322" x="82.94644811572834" z="0.0"/>
  </node>
  <node id="23508" label="ENSMUSG00000025001" cy:nodeId="2022">
    <graphics y="404.32631986497825" x="168.42114904346272" z="0.0"/>
  </node>
  <node id="23507" label="ENSMUSG00000024989" cy:nodeId="2023">
    <graphics y="-23.187086888561794" x="-226.18332788524822" z="0.0"/>
  </node>
  <node id="23506" label="ENSMUSG00000024978" cy:nodeId="2024">
    <graphics y="-44.950604268322536" x="90.08888891162678" z="0.0"/>
  </node>
  <node id="23505" label="ENSMUSG00000024891" cy:nodeId="2025">
    <graphics y="50.30279081224387" x="-78.48469659862712" z="0.0"/>
  </node>
  <node id="23504" label="ENSMUSG00000024858" cy:nodeId="2026">
    <graphics y="-119.98756105543191" x="272.42133214893147" z="0.0"/>
  </node>
  <node id="23503" label="ENSMUSG00000024795" cy:nodeId="2027">
    <graphics y="53.4433013713259" x="-210.1248142438908" z="0.0"/>
  </node>
  <node id="23502" label="ENSMUSG00000024777" cy:nodeId="2028">
    <graphics y="-27.588365384350368" x="34.14742162647053" z="0.0"/>
  </node>
  <node id="23501" label="ENSMUSG00000024774" cy:nodeId="2029">
    <graphics y="138.67727201341575" x="-233.73770258007244" z="0.0"/>
  </node>
  <node id="23500" label="ENSMUSG00000024644" cy:nodeId="2030">
    <graphics y="46.882350138415745" x="146.49771764697834" z="0.0"/>
  </node>
  <node id="23499" label="ENSMUSG00000024597" cy:nodeId="2031">
    <graphics y="-140.72208864332254" x="172.2227542680721" z="0.0"/>
  </node>
  <node id="23498" label="ENSMUSG00000024575" cy:nodeId="2032">
    <graphics y="31.087985209216527" x="77.79039647998616" z="0.0"/>
  </node>
  <node id="23497" label="ENSMUSG00000024542" cy:nodeId="2033">
    <graphics y="84.76103513597434" x="59.98696020068928" z="0.0"/>
  </node>
  <node id="23496" label="ENSMUSG00000024525" cy:nodeId="2034">
    <graphics y="-65.13319093824441" x="135.93341710986897" z="0.0"/>
  </node>
  <node id="23495" label="ENSMUSG00000024516" cy:nodeId="2035">
    <graphics y="41.01920621751731" x="102.75638463916584" z="0.0"/>
  </node>
  <node id="23494" label="ENSMUSG00000024301" cy:nodeId="2036">
    <graphics y="-118.66917879224832" x="56.14131811084553" z="0.0"/>
  </node>
  <node id="23493" label="ENSMUSG00000024299" cy:nodeId="2037">
    <graphics y="97.47812955736106" x="65.52770116748616" z="0.0"/>
  </node>
  <node id="23492" label="ENSMUSG00000024232" cy:nodeId="2038">
    <graphics y="82.35605924486106" x="-139.70765039501384" z="0.0"/>
  </node>
  <node id="23491" label="ENSMUSG00000024193" cy:nodeId="2039">
    <graphics y="-147.4142883503538" x="-274.68765375194744" z="0.0"/>
  </node>
  <node id="23490" label="ENSMUSG00000024063" cy:nodeId="2040">
    <graphics y="-140.02612764478738" x="-169.69269296703533" z="0.0"/>
  </node>
  <node id="23489" label="ENSMUSG00000023940" cy:nodeId="2041">
    <graphics y="-252.505772420178" x="16.354452876470532" z="0.0"/>
  </node>
  <node id="23488" label="ENSMUSG00000023272" cy:nodeId="2042">
    <graphics y="-249.73083955884988" x="-79.6142818647404" z="0.0"/>
  </node>
  <node id="23487" label="ENSMUSG00000023236" cy:nodeId="2043">
    <graphics y="228.52244108079856" x="9.456763057134594" z="0.0"/>
  </node>
  <node id="23486" label="ENSMUSG00000023224" cy:nodeId="2044">
    <graphics y="-143.52582246900613" x="31.98578527393147" z="0.0"/>
  </node>
  <node id="23485" label="ENSMUSG00000023032" cy:nodeId="2045">
    <graphics y="-33.75113184095437" x="-193.48442956981853" z="0.0"/>
  </node>
  <node id="23484" label="ENSMUSG00000023017" cy:nodeId="2046">
    <graphics y="140.65818326829856" x="14.990210322759594" z="0.0"/>
  </node>
  <node id="23483" label="ENSMUSG00000023015" cy:nodeId="2047">
    <graphics y="-175.60617525220925" x="-51.795548649408374" z="0.0"/>
  </node>
  <node id="23482" label="ENSMUSG00000023009" cy:nodeId="2048">
    <graphics y="32.45517270921653" x="22.400320796392407" z="0.0"/>
  </node>
  <node id="23481" label="ENSMUSG00000023008" cy:nodeId="2049">
    <graphics y="-6.372467824230739" x="197.83673742236897" z="0.0"/>
  </node>
  <node id="23480" label="ENSMUSG00000023004" cy:nodeId="2050">
    <graphics y="106.80874936937278" x="-150.15431329784587" z="0.0"/>
  </node>
  <node id="23479" label="ENSMUSG00000022945" cy:nodeId="2051">
    <graphics y="-300.588780232678" x="-64.7073452192326" z="0.0"/>
  </node>
  <node id="23478" label="ENSMUSG00000022912" cy:nodeId="2052">
    <graphics y="-1.2223575794797625" x="188.0286624711971" z="0.0"/>
  </node>
  <node id="23477" label="ENSMUSG00000022900" cy:nodeId="2053">
    <graphics y="165.9110976970095" x="-52.51740381298259" z="0.0"/>
  </node>
  <node id="23476" label="ENSMUSG00000022864" cy:nodeId="2054">
    <graphics y="-102.39403230787332" x="-24.32360193309978" z="0.0"/>
  </node>
  <node id="23475" label="ENSMUSG00000022762" cy:nodeId="2055">
    <graphics y="255.46886747240012" x="-61.060692997552906" z="0.0"/>
  </node>
  <node id="23474" label="ENSMUSG00000022748" cy:nodeId="2056">
    <graphics y="57.23939054368918" x="295.2647769731502" z="0.0"/>
  </node>
  <node id="23473" label="ENSMUSG00000022673" cy:nodeId="2057">
    <graphics y="230.80527799486106" x="147.87195470752522" z="0.0"/>
  </node>
  <node id="23472" label="ENSMUSG00000022619" cy:nodeId="2058">
    <graphics y="199.53759305833762" x="-340.59195825634197" z="0.0"/>
  </node>
  <node id="23471" label="ENSMUSG00000022519" cy:nodeId="2059">
    <graphics y="94.37834470628684" x="-2.717995853998218" z="0.0"/>
  </node>
  <node id="23470" label="ENSMUSG00000022436" cy:nodeId="2060">
    <graphics y="-88.83401186109597" x="-201.8106052595158" z="0.0"/>
  </node>
  <node id="23469" label="ENSMUSG00000022385" cy:nodeId="2061">
    <graphics y="-67.07288820386941" x="171.47406652393147" z="0.0"/>
  </node>
  <node id="23468" label="ENSMUSG00000022360" cy:nodeId="2062">
    <graphics y="184.90070646165793" x="94.0840366167049" z="0.0"/>
  </node>
  <node id="23467" label="ENSMUSG00000022253" cy:nodeId="2063">
    <graphics y="139.11374967454856" x="-140.98246118602947" z="0.0"/>
  </node>
  <node id="23466" label="ENSMUSG00000022177" cy:nodeId="2064">
    <graphics y="234.4333907878298" x="7.414572505376782" z="0.0"/>
  </node>
  <node id="23465" label="ENSMUSG00000022148" cy:nodeId="2065">
    <graphics y="36.680262736071995" x="-142.11270162639812" z="0.0"/>
  </node>
  <node id="23464" label="ENSMUSG00000022136" cy:nodeId="2066">
    <graphics y="225.20225065111106" x="-55.43604394970134" z="0.0"/>
  </node>
  <node id="23463" label="ENSMUSG00000022048" cy:nodeId="2067">
    <graphics y="370.77056424974387" x="287.6248843950252" z="0.0"/>
  </node>
  <node id="23462" label="ENSMUSG00000022003" cy:nodeId="2068">
    <graphics y="-157.037022420178" x="-35.40874597606853" z="0.0"/>
  </node>
  <node id="23461" label="ENSMUSG00000021876" cy:nodeId="2069">
    <graphics y="-93.3877304279905" x="79.10364416065022" z="0.0"/>
  </node>
  <node id="23460" label="ENSMUSG00000021831" cy:nodeId="2070">
    <graphics y="161.75988309740012" x="88.36104467334553" z="0.0"/>
  </node>
  <node id="23459" label="ENSMUSG00000021811" cy:nodeId="2071">
    <graphics y="433.5380508220095" x="93.00191381397053" z="0.0"/>
  </node>
  <node id="23458" label="ENSMUSG00000021728" cy:nodeId="2072">
    <graphics y="21.561331919421605" x="-459.4382564741154" z="0.0"/>
  </node>
  <node id="23457" label="ENSMUSG00000021725" cy:nodeId="2073">
    <graphics y="53.477069071521214" x="-126.08030054149822" z="0.0"/>
  </node>
  <node id="23456" label="ENSMUSG00000021453" cy:nodeId="2074">
    <graphics y="48.697413614978245" x="58.364905146978344" z="0.0"/>
  </node>
  <node id="23455" label="ENSMUSG00000021391" cy:nodeId="2075">
    <graphics y="-18.654493161449977" x="-223.23915216503337" z="0.0"/>
  </node>
  <node id="23454" label="ENSMUSG00000021223" cy:nodeId="2076">
    <graphics y="-129.992100545178" x="-327.90445825634197" z="0.0"/>
  </node>
  <node id="23453" label="ENSMUSG00000021221" cy:nodeId="2077">
    <graphics y="-77.82731325269754" x="-108.76648065624431" z="0.0"/>
  </node>
  <node id="23452" label="ENSMUSG00000021115" cy:nodeId="2078">
    <graphics y="189.68543546556418" x="42.276160029790844" z="0.0"/>
  </node>
  <node id="23451" label="ENSMUSG00000020914" cy:nodeId="2079">
    <graphics y="259.6456252849001" x="-53.62889978466228" z="0.0"/>
  </node>
  <node id="23450" label="ENSMUSG00000020901" cy:nodeId="2080">
    <graphics y="-289.83371431470925" x="-23.45122644481853" z="0.0"/>
  </node>
  <node id="23449" label="ENSMUSG00000020897" cy:nodeId="2081">
    <graphics y="225.84772794603293" x="6.977804927251782" z="0.0"/>
  </node>
  <node id="23448" label="ENSMUSG00000020873" cy:nodeId="2082">
    <graphics y="240.6508437907595" x="-86.2361080366154" z="0.0"/>
  </node>
  <node id="23447" label="ENSMUSG00000020846" cy:nodeId="2083">
    <graphics y="-175.8367050373655" x="11.763357905767407" z="0.0"/>
  </node>
  <node id="23446" label="ENSMUSG00000020814" cy:nodeId="2084">
    <graphics y="99.28831022142356" x="-160.01767274913982" z="0.0"/>
  </node>
  <node id="23445" label="ENSMUSG00000020788" cy:nodeId="2085">
    <graphics y="220.8236495768923" x="10.140707759283032" z="0.0"/>
  </node>
  <node id="23444" label="ENSMUSG00000020741" cy:nodeId="2086">
    <graphics y="-143.25199586988504" x="-155.2785999494572" z="0.0"/>
  </node>
  <node id="23443" label="ENSMUSG00000020712" cy:nodeId="2087">
    <graphics y="184.05446927904075" x="216.54141881885334" z="0.0"/>
  </node>
  <node id="23442" label="ENSMUSG00000020668" cy:nodeId="2088">
    <graphics y="241.48284452318137" x="14.352988032720532" z="0.0"/>
  </node>
  <node id="23441" label="ENSMUSG00000020649" cy:nodeId="2089">
    <graphics y="-37.69890291334207" x="82.68025854053303" z="0.0"/>
  </node>
  <node id="23440" label="ENSMUSG00000020577" cy:nodeId="2090">
    <graphics y="-166.66302950025613" x="77.63379552783772" z="0.0"/>
  </node>
  <node id="23439" label="ENSMUSG00000020573" cy:nodeId="2091">
    <graphics y="160.01398771165793" x="-44.192338200189624" z="0.0"/>
  </node>
  <node id="23438" label="ENSMUSG00000020493" cy:nodeId="2092">
    <graphics y="266.1613723552126" x="152.31226232471272" z="0.0"/>
  </node>
  <node id="23437" label="ENSMUSG00000020471" cy:nodeId="2093">
    <graphics y="306.27382963060325" x="-64.70251581249431" z="0.0"/>
  </node>
  <node id="23436" label="ENSMUSG00000020261" cy:nodeId="2094">
    <graphics y="7.699650934924534" x="-223.6381847578068" z="0.0"/>
  </node>
  <node id="23435" label="ENSMUSG00000020230" cy:nodeId="2095">
    <graphics y="59.53509061693137" x="-404.0899898725529" z="0.0"/>
  </node>
  <node id="23434" label="ENSMUSG00000020185" cy:nodeId="2096">
    <graphics y="34.47777097581809" x="-117.7006199079533" z="0.0"/>
  </node>
  <node id="23433" label="ENSMUSG00000020034" cy:nodeId="2097">
    <graphics y="31.09697263597434" x="-216.8420536237736" z="0.0"/>
  </node>
  <node id="23432" label="ENSMUSG00000019986" cy:nodeId="2098">
    <graphics y="143.48009794115012" x="-101.13276788768962" z="0.0"/>
  </node>
  <node id="23431" label="ENSMUSG00000019982" cy:nodeId="2099">
    <graphics y="-24.50996906400735" x="-44.647111149408374" z="0.0"/>
  </node>
  <node id="23430" label="ENSMUSG00000019947" cy:nodeId="2100">
    <graphics y="-36.20084268690164" x="-223.5702602582951" z="0.0"/>
  </node>
  <node id="23429" label="ENSMUSG00000019831" cy:nodeId="2101">
    <graphics y="-62.03352815748269" x="-136.11009523449138" z="0.0"/>
  </node>
  <node id="23428" label="ENSMUSG00000019796" cy:nodeId="2102">
    <graphics y="36.10208433031028" x="-212.65834161815837" z="0.0"/>
  </node>
  <node id="23427" label="ENSMUSG00000019773" cy:nodeId="2103">
    <graphics y="140.27833097337668" x="43.45201757373616" z="0.0"/>
  </node>
  <node id="23426" label="ENSMUSG00000019564" cy:nodeId="2104">
    <graphics y="42.93091886400168" x="217.8407962602596" z="0.0"/>
  </node>
  <node id="23425" label="ENSMUSG00000019303" cy:nodeId="2105">
    <graphics y="166.01291959642356" x="-51.33586999950603" z="0.0"/>
  </node>
  <node id="23424" label="ENSMUSG00000019302" cy:nodeId="2106">
    <graphics y="39.95386808275168" x="198.02692296924397" z="0.0"/>
  </node>
  <node id="23423" label="ENSMUSG00000019066" cy:nodeId="2107">
    <graphics y="-86.11902315259988" x="-196.67024347362712" z="0.0"/>
  </node>
  <node id="23422" label="ENSMUSG00000018740" cy:nodeId="2108">
    <graphics y="-148.9685409748655" x="160.81854894580647" z="0.0"/>
  </node>
  <node id="23421" label="ENSMUSG00000018340" cy:nodeId="2109">
    <graphics y="166.72352140306418" x="130.27765539111897" z="0.0"/>
  </node>
  <node id="23420" label="ENSMUSG00000017716" cy:nodeId="2110">
    <graphics y="171.28570096849387" x="37.21282079639241" z="0.0"/>
  </node>
  <node id="23419" label="ENSMUSG00000017550" cy:nodeId="2111">
    <graphics y="141.40894620775168" x="52.22173192920491" z="0.0"/>
  </node>
  <node id="23418" label="ENSMUSG00000017493" cy:nodeId="2112">
    <graphics y="254.12194364427512" x="-175.3013393598576" z="0.0"/>
  </node>
  <node id="23417" label="ENSMUSG00000017466" cy:nodeId="2113">
    <graphics y="98.96869962572043" x="-281.3783199506779" z="0.0"/>
  </node>
  <node id="23416" label="ENSMUSG00000017446" cy:nodeId="2114">
    <graphics y="138.118739298572" x="-221.06244012890056" z="0.0"/>
  </node>
  <node id="23415" label="ENSMUSG00000017165" cy:nodeId="2115">
    <graphics y="130.57265775560325" x="-216.36658594188884" z="0.0"/>
  </node>
  <node id="23414" label="ENSMUSG00000016526" cy:nodeId="2116">
    <graphics y="78.94194333909934" x="-68.22602960643962" z="0.0"/>
  </node>
  <node id="23413" label="ENSMUSG00000015880" cy:nodeId="2117">
    <graphics y="-111.54836732984597" x="252.91849401416584" z="0.0"/>
  </node>
  <node id="23412" label="ENSMUSG00000015745" cy:nodeId="2118">
    <graphics y="-55.937847920666286" x="155.02204015674397" z="0.0"/>
  </node>
  <node id="23411" label="ENSMUSG00000014786" cy:nodeId="2119">
    <graphics y="-2.4852550709348407" x="90.58313634815022" z="0.0"/>
  </node>
  <node id="23410" label="ENSMUSG00000012443" cy:nodeId="2120">
    <graphics y="247.110682657947" x="-56.302506657220874" z="0.0"/>
  </node>
  <node id="23409" label="ENSMUSG00000011148" cy:nodeId="2121">
    <graphics y="-27.953730412731716" x="-175.7252781110783" z="0.0"/>
  </node>
  <node id="23408" label="ENSMUSG00000010362" cy:nodeId="2122">
    <graphics y="-6.801045247326442" x="199.58746984424397" z="0.0"/>
  </node>
  <node id="23407" label="ENSMUSG00000009575" cy:nodeId="2123">
    <graphics y="38.67079847215598" x="228.67835119190022" z="0.0"/>
  </node>
  <node id="23406" label="ENSMUSG00000009292" cy:nodeId="2124">
    <graphics y="-273.45334322095925" x="-174.6118862348576" z="0.0"/>
  </node>
  <node id="23405" label="ENSMUSG00000007827" cy:nodeId="2125">
    <graphics y="346.4967910563845" x="-258.00920984325603" z="0.0"/>
  </node>
  <node id="23404" label="ENSMUSG00000007207" cy:nodeId="2126">
    <graphics y="100.10380094407981" x="275.63556554736897" z="0.0"/>
  </node>
  <node id="23403" label="ENSMUSG00000006784" cy:nodeId="2127">
    <graphics y="180.68645780443137" x="166.27246740283772" z="0.0"/>
  </node>
  <node id="23402" label="ENSMUSG00000006715" cy:nodeId="2128">
    <graphics y="185.703211954822" x="199.97168615283772" z="0.0"/>
  </node>
  <node id="23401" label="ENSMUSG00000006494" cy:nodeId="2129">
    <graphics y="16.188090494861058" x="-137.06172868786052" z="0.0"/>
  </node>
  <node id="23400" label="ENSMUSG00000005973" cy:nodeId="2130">
    <graphics y="316.15761869310325" x="-57.80292627392009" z="0.0"/>
  </node>
  <node id="23399" label="ENSMUSG00000005533" cy:nodeId="2131">
    <graphics y="-45.30893976331765" x="-133.84052583751873" z="0.0"/>
  </node>
  <node id="23398" label="ENSMUSG00000005410" cy:nodeId="2132">
    <graphics y="233.87159269212668" x="-96.86177560863689" z="0.0"/>
  </node>
  <node id="23397" label="ENSMUSG00000005370" cy:nodeId="2133">
    <graphics y="-74.89661867261941" x="145.80863073291584" z="0.0"/>
  </node>
  <node id="23396" label="ENSMUSG00000005267" cy:nodeId="2134">
    <graphics y="109.8893691813845" x="-104.64751550731853" z="0.0"/>
  </node>
  <node id="23395" label="ENSMUSG00000004151" cy:nodeId="2135">
    <graphics y="98.82633512376731" x="-297.47396204052166" z="0.0"/>
  </node>
  <node id="23394" label="ENSMUSG00000003992" cy:nodeId="2136">
    <graphics y="139.4943038737673" x="88.65376928272053" z="0.0"/>
  </node>
  <node id="23393" label="ENSMUSG00000003545" cy:nodeId="2137">
    <graphics y="-25.265335866222927" x="-30.688142033197437" z="0.0"/>
  </node>
  <node id="23392" label="ENSMUSG00000003273" cy:nodeId="2138">
    <graphics y="-416.028721638928" x="-261.3122493940373" z="0.0"/>
  </node>
  <node id="23391" label="ENSMUSG00000003134" cy:nodeId="2139">
    <graphics y="187.2311660563845" x="-35.43927118358806" z="0.0"/>
  </node>
  <node id="23390" label="ENSMUSG00000003032" cy:nodeId="2140">
    <graphics y="69.61045377611106" x="116.33832433643147" z="0.0"/>
  </node>
  <node id="23389" label="ENSMUSG00000002997" cy:nodeId="2141">
    <graphics y="313.55715482591575" x="105.7293460649471" z="0.0"/>
  </node>
  <node id="23388" label="ENSMUSG00000002885" cy:nodeId="2142">
    <graphics y="-247.36227876783425" x="59.67175939502522" z="0.0"/>
  </node>
  <node id="23387" label="ENSMUSG00000002870" cy:nodeId="2143">
    <graphics y="64.53124540208762" x="162.08521154346272" z="0.0"/>
  </node>
  <node id="23386" label="ENSMUSG00000002835" cy:nodeId="2144">
    <graphics y="170.68999784349387" x="40.741980342290844" z="0.0"/>
  </node>
  <node id="23385" label="ENSMUSG00000002565" cy:nodeId="2145">
    <graphics y="-161.28268892408425" x="256.00397375049397" z="0.0"/>
  </node>
  <node id="23384" label="ENSMUSG00000002489" cy:nodeId="2146">
    <graphics y="130.46581571458762" x="73.02692296924397" z="0.0"/>
  </node>
  <node id="23383" label="ENSMUSG00000002227" cy:nodeId="2147">
    <graphics y="-256.232334920178" x="10.051749019048657" z="0.0"/>
  </node>
  <node id="23382" label="ENSMUSG00000001403" cy:nodeId="2148">
    <graphics y="149.12990873216575" x="204.70014074268147" z="0.0"/>
  </node>
  <node id="23381" label="ENSMUSG00000001120" cy:nodeId="2149">
    <graphics y="-335.2759140217405" x="49.554968623540844" z="0.0"/>
  </node>
  <node id="23380" label="ENSMUSG00000000594" cy:nodeId="2150">
    <graphics y="126.32558744310325" x="-43.556481571771656" z="0.0"/>
  </node>
  <node id="23379" label="ENSMUSG00000000317" cy:nodeId="2151">
    <graphics y="28.269889048327855" x="292.6119144243221" z="0.0"/>
  </node>
  <node id="23378" label="ENSMUSG00000000142" cy:nodeId="2152">
    <graphics y="-264.98505098463113" x="5.329550532720532" z="0.0"/>
  </node>
  <node id="23377" label="ENSMUSG00000000782" cy:nodeId="2153">
    <graphics y="34.811976603259495" x="-21.09807703075603" z="0.0"/>
  </node>
  <node id="23376" label="ENSMUSG00000026398" cy:nodeId="2154">
    <graphics y="25.020846537341527" x="-41.4960186201115" z="0.0"/>
  </node>
  <node id="23375" label="ENSMUSG00000037583" cy:nodeId="2155">
    <graphics y="-27.552450963268825" x="37.843237666509594" z="0.0"/>
  </node>
  <node id="23374" label="ENSMUSG00000027168" cy:nodeId="2156">
    <graphics y="11.053775004138402" x="-11.249718876459156" z="0.0"/>
  </node>
  <node id="23373" label="ENSMUSG00000035158" cy:nodeId="2157">
    <graphics y="-42.86747057081277" x="-3.8506710248966556" z="0.0"/>
  </node>
  <node id="23372" label="ENSMUSG00000022528" cy:nodeId="2158">
    <graphics y="-31.884620496044704" x="-60.29424402294353" z="0.0"/>
  </node>
  <node id="23371" label="ENSMUSG00000034771" cy:nodeId="2159">
    <graphics y="-72.57970506788308" x="-561.1240780073185" z="0.0"/>
  </node>
  <node id="23370" label="ENSMUSG00000054115" cy:nodeId="2160">
    <graphics y="-100.16243440748269" x="589.8817813676815" z="0.0"/>
  </node>
  <node id="23369" label="ENSMUSG00000041431" cy:nodeId="2161">
    <graphics y="-83.75150377393777" x="-238.79493829784587" z="0.0"/>
  </node>
  <node id="23368" label="ENSMUSG00000032380" cy:nodeId="2162">
    <graphics y="30.966002634753636" x="110.93497350635334" z="0.0"/>
  </node>
  <node id="23367" label="ENSMUSG00000029521" cy:nodeId="2163">
    <graphics y="-155.6870926106077" x="-337.5579616743107" z="0.0"/>
  </node>
  <node id="23366" label="ENSMUSG00000028884" cy:nodeId="2164">
    <graphics y="209.19227140306418" x="-80.44992181835369" z="0.0"/>
  </node>
  <node id="23365" label="ENSMUSG00000027715" cy:nodeId="2165">
    <graphics y="61.34769742845481" x="53.87248876514241" z="0.0"/>
  </node>
  <node id="23364" label="ENSMUSG00000027641" cy:nodeId="2166">
    <graphics y="116.17937772630637" x="-64.64439508495525" z="0.0"/>
  </node>
  <node id="23363" label="ENSMUSG00000027602" cy:nodeId="2167">
    <graphics y="-231.49281770826394" x="-226.41158411083416" z="0.0"/>
  </node>
  <node id="23362" label="ENSMUSG00000027342" cy:nodeId="2168">
    <graphics y="-427.45956880689675" x="-111.32581064281658" z="0.0"/>
  </node>
  <node id="23361" label="ENSMUSG00000019942" cy:nodeId="2169">
    <graphics y="149.32903592943137" x="-66.37782404003337" z="0.0"/>
  </node>
  <node id="23360" label="ENSMUSG00000017499" cy:nodeId="2170">
    <graphics y="219.23073881029075" x="83.2955844682674" z="0.0"/>
  </node>
  <node id="23359" label="ENSMUSG00000006678" cy:nodeId="2171">
    <graphics y="248.43188016771262" x="49.665686396978344" z="0.0"/>
  </node>
  <node id="23358" label="ENSMUSG00000006398" cy:nodeId="2172">
    <graphics y="265.996424845447" x="14.026114253423657" z="0.0"/>
  </node>
  <node id="23357" label="ENSMUSG00000002109" cy:nodeId="2173">
    <graphics y="-338.5484665119749" x="-464.3211910444279" z="0.0"/>
  </node>
  <node id="23356" label="ENSMUSG00000070348" cy:nodeId="2174">
    <graphics y="-129.69958192945535" x="-17.58049890575603" z="0.0"/>
  </node>
  <node id="23355" label="ENSMUSG00000048001" cy:nodeId="2175">
    <graphics y="-578.4662826740843" x="148.83777502002522" z="0.0"/>
  </node>
  <node id="23354" label="ENSMUSG00000027314" cy:nodeId="2176">
    <graphics y="-318.8201950275999" x="564.155096797369" z="0.0"/>
  </node>
  <node id="23353" label="ENSMUSG00000026923" cy:nodeId="2177">
    <graphics y="-163.32404024244363" x="86.25716283740803" z="0.0"/>
  </node>
  <node id="23352" label="ENSMUSG00000024590" cy:nodeId="2178">
    <graphics y="-162.4948318684202" x="117.5502689165096" z="0.0"/>
  </node>
  <node id="23351" label="ENSMUSG00000026565" cy:nodeId="2179">
    <graphics y="-3.5275142872434344" x="2.675741938970532" z="0.0"/>
  </node>
  <node id="23350" label="ENSMUSG00000035864" cy:nodeId="2180">
    <graphics y="332.1132461345095" x="196.7573001665096" z="0.0"/>
  </node>
  <node id="23349" label="ENSMUSG00000003814" cy:nodeId="2181">
    <graphics y="99.05082242845481" x="259.2869632524471" z="0.0"/>
  </node>
  <node id="23348" label="ENSMUSG00000024431" cy:nodeId="2182">
    <graphics y="-8.241603680859157" x="-50.26307031688884" z="0.0"/>
  </node>
  <node id="23347" label="ENSMUSG00000030483" cy:nodeId="2183">
    <graphics y="273.1664687907595" x="-160.1336204725285" z="0.0"/>
  </node>
  <node id="23346" label="ENSMUSG00000029727" cy:nodeId="2184">
    <graphics y="100.48039548753684" x="-400.02701685009197" z="0.0"/>
  </node>
  <node id="23345" label="ENSMUSG00000022479" cy:nodeId="2185">
    <graphics y="23.949195078601292" x="-44.578385563470874" z="0.0"/>
  </node>
  <node id="23344" label="ENSMUSG00000027490" cy:nodeId="2186">
    <graphics y="-15.497057744274684" x="-27.43767664013103" z="0.0"/>
  </node>
  <node id="23343" label="ENSMUSG00000027381" cy:nodeId="2187">
    <graphics y="58.08910673021262" x="89.48525121631428" z="0.0"/>
  </node>
  <node id="23342" label="ENSMUSG00000022346" cy:nodeId="2188">
    <graphics y="20.411051920642308" x="-24.21959802684978" z="0.0"/>
  </node>
  <node id="23341" label="ENSMUSG00000039236" cy:nodeId="2189">
    <graphics y="-224.91501314283425" x="-337.64539453563884" z="0.0"/>
  </node>
  <node id="23340" label="ENSMUSG00000018899" cy:nodeId="2190">
    <graphics y="-7.884791203747341" x="-2.965432377435718" z="0.0"/>
  </node>
  <node id="23339" label="ENSMUSG00000027793" cy:nodeId="2191">
    <graphics y="-308.37140352369363" x="-631.9746944623967" z="0.0"/>
  </node>
  <node id="23338" label="ENSMUSG00000017861" cy:nodeId="2192">
    <graphics y="-91.23012239576394" x="91.70201757373616" z="0.0"/>
  </node>
  <node id="23337" label="ENSMUSG00000041147" cy:nodeId="2193">
    <graphics y="-256.2335098469358" x="-113.9457027631779" z="0.0"/>
  </node>
  <node id="23336" label="ENSMUSG00000027323" cy:nodeId="2194">
    <graphics y="-274.91277010084207" x="-13.926476688959156" z="0.0"/>
  </node>
  <node id="23335" label="ENSMUSG00000017146" cy:nodeId="2195">
    <graphics y="-186.843418904553" x="-355.34847375927166" z="0.0"/>
  </node>
  <node id="23334" label="ENSMUSG00000029275" cy:nodeId="2196">
    <graphics y="-521.4766891682249" x="195.85755041065022" z="0.0"/>
  </node>
  <node id="23333" label="ENSMUSG00000010175" cy:nodeId="2197">
    <graphics y="-326.8432663166624" x="315.3248355669002" z="0.0"/>
  </node>
</graph>
