# Supplementary material for: Regulatory network analysis of Paneth cell and goblet cell enriched gut organoids using transcriptomics approaches
Source: Royal Society of Chemistry journal article supplement (doi:10.1039/c9mo00130a), 2019-12-10
Supplement: c9mo00130a2.cys [file c9mo00130a2.cys › CytoscapeSession-2019_09_26-21_57/views/21371-44768-1%3A+Cluster+3+%28Score%3A+5.923%29.xgmml]

<?xml version="1.0" encoding="UTF-8" standalone="yes"?>
<graph id="44768" label="44768" cy:view="1" cy:networkId="21371" cy:visualStyle="default" cy:rendererId="org.cytoscape.ding" cy:documentVersion="3.0" xmlns:dc="http://purl.org/dc/elements/1.1/" xmlns:xlink="http://www.w3.org/1999/xlink" xmlns:rdf="http://www.w3.org/1999/02/22-rdf-syntax-ns#" xmlns:cy="http://www.cytoscape.org" xmlns="http://www.cs.rpi.edu/XGMML">
  <graphics>
    <att name="NETWORK_CENTER_Z_LOCATION" value="0.0" type="string" cy:type="String"/>
    <att name="NETWORK_WIDTH" value="658.0" type="string" cy:type="String"/>
    <att name="NETWORK_HEIGHT" value="510.0" type="string" cy:type="String"/>
    <att name="NETWORK_DEPTH" value="0.0" type="string" cy:type="String"/>
    <att name="NETWORK_CENTER_X_LOCATION" value="-42.58988952636719" type="string" cy:type="String"/>
    <att name="NETWORK_TITLE" value="" type="string" cy:type="String"/>
    <att name="NETWORK_SCALE_FACTOR" value="0.668796193131413" type="string" cy:type="String"/>
    <att name="NETWORK_EDGE_SELECTION" value="true" type="string" cy:type="String"/>
    <att name="NETWORK_ANNOTATION_SELECTION" value="false" type="string" cy:type="String"/>
    <att name="NETWORK_CENTER_Y_LOCATION" value="-134.64944458007812" type="string" cy:type="String"/>
    <att name="NETWORK_NODE_SELECTION" value="true" type="string" cy:type="String"/>
  </graphics>
  <node id="44955" label="ENSMUSG00000024597" cy:nodeId="2031">
    <graphics y="-212.5865888761976" x="176.76621869552963" z="0.0"/>
  </node>
  <node id="44956" label="ENSMUSG00000024575" cy:nodeId="2032">
    <graphics y="-357.3795926532806" x="59.1029937803303" z="0.0"/>
  </node>
  <node id="44957" label="ENSMUSG00000020424" cy:nodeId="1520">
    <graphics y="-308.2995003146831" x="245.2842201902169" z="0.0"/>
  </node>
  <node id="44958" label="ENSMUSG00000024542" cy:nodeId="2033">
    <graphics y="-418.8937230601926" x="45.45995294099313" z="0.0"/>
  </node>
  <node id="44959" label="ENSMUSG00000024525" cy:nodeId="2034">
    <graphics y="117.28401299497654" x="50.94334640641358" z="0.0"/>
  </node>
  <node id="44960" label="ENSMUSG00000020135" cy:nodeId="1523">
    <graphics y="-42.93559241826955" x="-207.09729418624227" z="0.0"/>
  </node>
  <node id="44961" label="ENSMUSG00000024301" cy:nodeId="2036">
    <graphics y="-227.81518976113242" x="138.12062455278695" z="0.0"/>
  </node>
  <node id="44962" label="ENSMUSG00000019188" cy:nodeId="1526">
    <graphics y="-302.34282013633396" x="37.034273977011516" z="0.0"/>
  </node>
  <node id="44963" label="ENSMUSG00000022332" cy:nodeId="1015">
    <graphics y="-288.8823673370615" x="271.155409610593" z="0.0"/>
  </node>
  <node id="44964" label="ENSMUSG00000024063" cy:nodeId="2040">
    <graphics y="-21.865546968069047" x="173.65700605180592" z="0.0"/>
  </node>
  <node id="44965" label="ENSMUSG00000023940" cy:nodeId="2041">
    <graphics y="-161.0979872022815" x="225.680655079439" z="0.0"/>
  </node>
  <node id="44966" label="ENSMUSG00000023032" cy:nodeId="2045">
    <graphics y="-310.05742779972655" x="-86.53609220323983" z="0.0"/>
  </node>
  <node id="44967" label="ENSMUSG00000023009" cy:nodeId="2048">
    <graphics y="-401.4533896260178" x="29.305533755352272" z="0.0"/>
  </node>
  <node id="44968" label="ENSMUSG00000023008" cy:nodeId="2049">
    <graphics y="-437.7096057723432" x="-214.74126184975918" z="0.0"/>
  </node>
  <node id="44969" label="ENSMUSG00000023004" cy:nodeId="2050">
    <graphics y="-19.742568584547854" x="126.46757957815662" z="0.0"/>
  </node>
  <node id="44970" label="ENSMUSG00000021539" cy:nodeId="1028">
    <graphics y="-31.7206835962461" x="-371.81415668422426" z="0.0"/>
  </node>
  <node id="44971" label="ENSMUSG00000022900" cy:nodeId="2053">
    <graphics y="-131.77179815173508" x="-360.2637926594135" z="0.0"/>
  </node>
  <node id="44972" label="ENSMUSG00000022864" cy:nodeId="2054">
    <graphics y="-446.4329936522595" x="-30.976579677014037" z="0.0"/>
  </node>
  <node id="44973" label="ENSMUSG00000051498" cy:nodeId="1543">
    <graphics y="95.19183072912256" x="-26.365158347000317" z="0.0"/>
  </node>
  <node id="44974" label="ENSMUSG00000022748" cy:nodeId="2056">
    <graphics y="-272.1610338148035" x="215.00037516311536" z="0.0"/>
  </node>
  <node id="44975" label="ENSMUSG00000022519" cy:nodeId="2059">
    <graphics y="-111.50247690915612" x="-372.2524748195152" z="0.0"/>
  </node>
  <node id="44976" label="ENSMUSG00000022436" cy:nodeId="2060">
    <graphics y="-360.088600051303" x="-139.57055586432818" z="0.0"/>
  </node>
  <node id="44977" label="ENSMUSG00000022385" cy:nodeId="2061">
    <graphics y="-191.01269130447344" x="-384.9750795464796" z="0.0"/>
  </node>
  <node id="44978" label="ENSMUSG00000022360" cy:nodeId="2062">
    <graphics y="132.91337013336013" x="-37.25202519464085" z="0.0"/>
  </node>
  <node id="44979" label="ENSMUSG00000022177" cy:nodeId="2064">
    <graphics y="-65.71050135794034" x="-155.1074771360095" z="0.0"/>
  </node>
  <node id="44980" label="ENSMUSG00000022136" cy:nodeId="2066">
    <graphics y="-401.51262372186363" x="-224.54473586212566" z="0.0"/>
  </node>
  <node id="44981" label="ENSMUSG00000020894" cy:nodeId="1556">
    <graphics y="-394.55375055463765" x="-65.31101935623248" z="0.0"/>
  </node>
  <node id="44982" label="ENSMUSG00000020472" cy:nodeId="1557">
    <graphics y="11.389809121980619" x="-190.68669378454365" z="0.0"/>
  </node>
  <node id="44983" label="ENSMUSG00000021725" cy:nodeId="2073">
    <graphics y="-132.08258506849097" x="38.490546931653256" z="0.0"/>
  </node>
  <node id="44984" label="ENSMUSG00000042115" cy:nodeId="1562">
    <graphics y="-96.04559919674983" x="177.740733525829" z="0.0"/>
  </node>
  <node id="44985" label="ENSMUSG00000021221" cy:nodeId="2077">
    <graphics y="-47.010013680961606" x="204.92910593278378" z="0.0"/>
  </node>
  <node id="44986" label="ENSMUSG00000020897" cy:nodeId="2081">
    <graphics y="-78.75608704924136" x="54.14308185145126" z="0.0"/>
  </node>
  <node id="44987" label="ENSMUSG00000020741" cy:nodeId="2086">
    <graphics y="-57.91465365368488" x="263.8653522808501" z="0.0"/>
  </node>
  <node id="44988" label="ENSMUSG00000020712" cy:nodeId="2087">
    <graphics y="-67.35725781364224" x="24.642862081034906" z="0.0"/>
  </node>
  <node id="44989" label="ENSMUSG00000020668" cy:nodeId="2088">
    <graphics y="-311.9621848938973" x="-168.01860590337543" z="0.0"/>
  </node>
  <node id="44990" label="ENSMUSG00000062859" cy:nodeId="1577">
    <graphics y="-12.568700511971677" x="-230.90300874637697" z="0.0"/>
  </node>
  <node id="44991" label="ENSMUSG00000020577" cy:nodeId="2090">
    <graphics y="60.815176786086354" x="-268.1333810729071" z="0.0"/>
  </node>
  <node id="44992" label="ENSMUSG00000058624" cy:nodeId="1580">
    <graphics y="-155.38113760427674" x="174.02648167205984" z="0.0"/>
  </node>
  <node id="44993" label="ENSMUSG00000020230" cy:nodeId="2095">
    <graphics y="154.60219164567326" x="-212.13075197381173" z="0.0"/>
  </node>
  <node id="44994" label="ENSMUSG00000020185" cy:nodeId="2096">
    <graphics y="-300.2470171502917" x="-314.48731265892195" z="0.0"/>
  </node>
  <node id="44995" label="ENSMUSG00000020034" cy:nodeId="2097">
    <graphics y="-124.91930637634925" x="-327.06260527883734" z="0.0"/>
  </node>
  <node id="44996" label="ENSMUSG00000019986" cy:nodeId="2098">
    <graphics y="-186.10219995991204" x="-314.57400113379896" z="0.0"/>
  </node>
  <node id="44997" label="ENSMUSG00000018486" cy:nodeId="1075">
    <graphics y="-202.2545051695789" x="-129.75176859914072" z="0.0"/>
  </node>
  <node id="44998" label="ENSMUSG00000019982" cy:nodeId="2099">
    <graphics y="-128.0002514372713" x="-26.527831241626277" z="0.0"/>
  </node>
  <node id="44999" label="ENSMUSG00000019947" cy:nodeId="2100">
    <graphics y="99.31698759102116" x="177.06948104594088" z="0.0"/>
  </node>
  <node id="45000" label="ENSMUSG00000019773" cy:nodeId="2103">
    <graphics y="-193.07180348965989" x="-280.5475970366376" z="0.0"/>
  </node>
  <node id="45001" label="ENSMUSG00000019564" cy:nodeId="2104">
    <graphics y="-232.1744466823441" x="38.00778917330473" z="0.0"/>
  </node>
  <node id="45002" label="ENSMUSG00000019302" cy:nodeId="2106">
    <graphics y="-188.2422833210478" x="216.32060367595588" z="0.0"/>
  </node>
  <node id="45003" label="ENSMUSG00000017204" cy:nodeId="1083">
    <graphics y="-330.8474687162733" x="164.28262779572427" z="0.0"/>
  </node>
  <node id="45004" label="ENSMUSG00000019066" cy:nodeId="2107">
    <graphics y="73.2660786667794" x="133.6959804979831" z="0.0"/>
  </node>
  <node id="45005" label="ENSMUSG00000018740" cy:nodeId="2108">
    <graphics y="-71.19478353031695" x="268.08954506562145" z="0.0"/>
  </node>
  <node id="45006" label="ENSMUSG00000043639" cy:nodeId="1596">
    <graphics y="-275.12059069768895" x="89.6461340090973" z="0.0"/>
  </node>
  <node id="45007" label="ENSMUSG00000057406" cy:nodeId="574">
    <graphics y="-291.7436773916893" x="258.67326398916657" z="0.0"/>
  </node>
  <node id="45008" label="ENSMUSG00000042429" cy:nodeId="1599">
    <graphics y="-98.4203071212546" x="-9.72437775786885" z="0.0"/>
  </node>
  <node id="45009" label="ENSMUSG00000017466" cy:nodeId="2113">
    <graphics y="-200.85708432259995" x="242.4004520274744" z="0.0"/>
  </node>
  <node id="45010" label="ENSMUSG00000057092" cy:nodeId="577">
    <graphics y="68.75451333770756" x="-258.0381100754459" z="0.0"/>
  </node>
  <node id="45011" label="ENSMUSG00000017446" cy:nodeId="2114">
    <graphics y="66.46500553750695" x="-248.0495417635587" z="0.0"/>
  </node>
  <node id="45012" label="ENSMUSG00000016526" cy:nodeId="2116">
    <graphics y="-438.0887075095998" x="-81.7455679905734" z="0.0"/>
  </node>
  <node id="45013" label="ENSMUSG00000038451" cy:nodeId="1606">
    <graphics y="66.04939835036117" x="-178.8792338839204" z="0.0"/>
  </node>
  <node id="45014" label="ENSMUSG00000015745" cy:nodeId="2118">
    <graphics y="95.11957339959234" x="-150.93073903962443" z="0.0"/>
  </node>
  <node id="45015" label="ENSMUSG00000037664" cy:nodeId="1608">
    <graphics y="-13.740227457783078" x="-284.11405115295315" z="0.0"/>
  </node>
  <node id="45016" label="ENSMUSG00000012443" cy:nodeId="2120">
    <graphics y="-273.1397888935029" x="-361.479846829325" z="0.0"/>
  </node>
  <node id="45017" label="ENSMUSG00000036913" cy:nodeId="1610">
    <graphics y="-366.1183318543353" x="206.96150905846216" z="0.0"/>
  </node>
  <node id="45018" label="ENSMUSG00000055629" cy:nodeId="589">
    <graphics y="-150.12899992964162" x="-177.65578752359698" z="0.0"/>
  </node>
  <node id="45019" label="ENSMUSG00000006784" cy:nodeId="2127">
    <graphics y="-32.03397221955211" x="135.00275500033078" z="0.0"/>
  </node>
  <node id="45020" label="ENSMUSG00000034773" cy:nodeId="1617">
    <graphics y="-420.3565427020521" x="-29.580368732374623" z="0.0"/>
  </node>
  <node id="45021" label="ENSMUSG00000005533" cy:nodeId="2131">
    <graphics y="-121.15302388213297" x="188.02314034153912" z="0.0"/>
  </node>
  <node id="45022" label="ENSMUSG00000005410" cy:nodeId="2132">
    <graphics y="43.65753730048951" x="22.6748318149006" z="0.0"/>
  </node>
  <node id="45023" label="ENSMUSG00000005370" cy:nodeId="2133">
    <graphics y="-141.49349393789547" x="-170.8728483863348" z="0.0"/>
  </node>
  <node id="45024" label="ENSMUSG00000004151" cy:nodeId="2135">
    <graphics y="-490.805869678718" x="-28.477322648808666" z="0.0"/>
  </node>
  <node id="45025" label="ENSMUSG00000002997" cy:nodeId="2141">
    <graphics y="-342.52787264028103" x="154.2107079635419" z="0.0"/>
  </node>
  <node id="45026" label="ENSMUSG00000002885" cy:nodeId="2142">
    <graphics y="-94.20764792988545" x="-332.0743279369104" z="0.0"/>
  </node>
  <node id="45027" label="ENSMUSG00000002489" cy:nodeId="2146">
    <graphics y="-40.60942266841568" x="71.6051352486607" z="0.0"/>
  </node>
  <node id="45028" label="ENSMUSG00000027544" cy:nodeId="1635">
    <graphics y="-81.21086236834243" x="-78.72460081201494" z="0.0"/>
  </node>
  <node id="45029" label="ENSMUSG00000037583" cy:nodeId="2155">
    <graphics y="-50.11512717532653" x="-14.726333654694969" z="0.0"/>
  </node>
  <node id="45030" label="ENSMUSG00000035158" cy:nodeId="2157">
    <graphics y="-174.13523407339034" x="-38.78761277989163" z="0.0"/>
  </node>
  <node id="45031" label="ENSMUSG00000024552" cy:nodeId="1645">
    <graphics y="-125.90200232638972" x="-385.70853893852615" z="0.0"/>
  </node>
  <node id="45032" label="ENSMUSG00000022528" cy:nodeId="2158">
    <graphics y="-178.07960487614162" x="-53.87879344554778" z="0.0"/>
  </node>
  <node id="45033" label="ENSMUSG00000042532" cy:nodeId="1136">
    <graphics y="-431.3442168840767" x="-192.47065269177693" z="0.0"/>
  </node>
  <node id="45034" label="ENSMUSG00000041431" cy:nodeId="2161">
    <graphics y="-5.407566241916854" x="179.5605828631883" z="0.0"/>
  </node>
  <node id="45035" label="ENSMUSG00000032380" cy:nodeId="2162">
    <graphics y="-282.78283784263874" x="223.86934836280264" z="0.0"/>
  </node>
  <node id="45036" label="ENSMUSG00000028884" cy:nodeId="2164">
    <graphics y="-331.0166474294866" x="-55.360695126878134" z="0.0"/>
  </node>
  <node id="45037" label="ENSMUSG00000038146" cy:nodeId="1142">
    <graphics y="-92.19850808462272" x="100.60578711378643" z="0.0"/>
  </node>
  <node id="45038" label="ENSMUSG00000019942" cy:nodeId="2169">
    <graphics y="-56.152538495323924" x="-349.37325929436355" z="0.0"/>
  </node>
  <node id="45039" label="ENSMUSG00000017652" cy:nodeId="1658">
    <graphics y="-123.0009731981846" x="-298.7540099494462" z="0.0"/>
  </node>
  <node id="45040" label="ENSMUSG00000014351" cy:nodeId="1659">
    <graphics y="59.23819353141849" x="194.32462443851068" z="0.0"/>
  </node>
  <node id="45041" label="ENSMUSG00000024151" cy:nodeId="1149">
    <graphics y="-166.84837003095922" x="268.8276184889296" z="0.0"/>
  </node>
  <node id="45042" label="ENSMUSG00000026923" cy:nodeId="2177">
    <graphics y="-64.86403829939978" x="83.52934246862702" z="0.0"/>
  </node>
  <node id="45043" label="ENSMUSG00000004366" cy:nodeId="1665">
    <graphics y="-179.7910670624587" x="-254.96928993270635" z="0.0"/>
  </node>
  <node id="45044" label="ENSMUSG00000024590" cy:nodeId="2178">
    <graphics y="-291.8685248035233" x="22.78904819339631" z="0.0"/>
  </node>
  <node id="45045" label="ENSMUSG00000026565" cy:nodeId="2179">
    <graphics y="-141.17017036708418" x="-52.23396301269531" z="0.0"/>
  </node>
  <node id="45046" label="ENSMUSG00000030483" cy:nodeId="2183">
    <graphics y="-479.84200818062084" x="-105.38068070191808" z="0.0"/>
  </node>
  <node id="45047" label="ENSMUSG00000027381" cy:nodeId="2187">
    <graphics y="-91.74945098828537" x="211.50759516434502" z="0.0"/>
  </node>
  <node id="45048" label="ENSMUSG00000017861" cy:nodeId="2192">
    <graphics y="-397.5778999009407" x="17.5943226597659" z="0.0"/>
  </node>
  <node id="45049" label="ENSMUSG00000032338" cy:nodeId="1170">
    <graphics y="-252.57948039947053" x="-174.0291014849772" z="0.0"/>
  </node>
  <node id="45050" label="ENSMUSG00000079037" cy:nodeId="1685">
    <graphics y="47.68957286996138" x="204.2870851506468" z="0.0"/>
  </node>
  <node id="45051" label="ENSMUSG00000078650" cy:nodeId="1687">
    <graphics y="-279.51086510415416" x="201.40661239189964" z="0.0"/>
  </node>
  <node id="45052" label="ENSMUSG00000024897" cy:nodeId="1176">
    <graphics y="-299.710499440396" x="-185.7091860600291" z="0.0"/>
  </node>
  <node id="45053" label="ENSMUSG00000078202" cy:nodeId="1689">
    <graphics y="90.37582212457525" x="149.6630121375871" z="0.0"/>
  </node>
  <node id="45054" label="ENSMUSG00000022018" cy:nodeId="1178">
    <graphics y="-479.3126794555072" x="-124.66196993930754" z="0.0"/>
  </node>
  <node id="45055" label="ENSMUSG00000075502" cy:nodeId="1691">
    <graphics y="15.21341399691503" x="60.95230996070538" z="0.0"/>
  </node>
  <node id="45056" label="ENSMUSG00000046070" cy:nodeId="667">
    <graphics y="-90.82585734322272" x="126.91380152373448" z="0.0"/>
  </node>
  <node id="44770" label="ENSMUSG00000074715" cy:nodeId="1695">
    <graphics y="-338.684756388029" x="-167.46554410546952" z="0.0"/>
  </node>
  <node id="44771" label="ENSMUSG00000074604" cy:nodeId="1696">
    <graphics y="-417.1751553034364" x="-185.11781796154307" z="0.0"/>
  </node>
  <node id="44772" label="ENSMUSG00000074476" cy:nodeId="1697">
    <graphics y="-416.19701701882866" x="-146.65239286291995" z="0.0"/>
  </node>
  <node id="44773" label="ENSMUSG00000074217" cy:nodeId="1698">
    <graphics y="-294.72822854292025" x="-86.3122460683148" z="0.0"/>
  </node>
  <node id="44774" label="ENSMUSG00000079654" cy:nodeId="1186">
    <graphics y="-257.5135065639628" x="-289.96689773326915" z="0.0"/>
  </node>
  <node id="44775" label="ENSMUSG00000079442" cy:nodeId="1187">
    <graphics y="-226.7036375000493" x="52.298854080512406" z="0.0"/>
  </node>
  <node id="44776" label="ENSMUSG00000078984" cy:nodeId="1188">
    <graphics y="113.89190984500695" x="-63.61489150173622" z="0.0"/>
  </node>
  <node id="44777" label="ENSMUSG00000071547" cy:nodeId="1703">
    <graphics y="-130.74259045821722" x="123.69399616011516" z="0.0"/>
  </node>
  <node id="44779" label="ENSMUSG00000069515" cy:nodeId="1197">
    <graphics y="-54.236905133022276" x="40.79834576824507" z="0.0"/>
  </node>
  <node id="44778" label="ENSMUSG00000043419" cy:nodeId="685">
    <graphics y="15.023384994410122" x="240.71760112308772" z="0.0"/>
  </node>
  <node id="44780" label="ENSMUSG00000068877" cy:nodeId="1199">
    <graphics y="183.8468468592525" x="-140.57990494219672" z="0.0"/>
  </node>
  <node id="44781" label="ENSMUSG00000064215" cy:nodeId="1712">
    <graphics y="-326.0627683613275" x="-93.00197403437092" z="0.0"/>
  </node>
  <node id="44782" label="ENSMUSG00000061718" cy:nodeId="1717">
    <graphics y="-138.98880197022874" x="107.31672350793562" z="0.0"/>
  </node>
  <node id="44783" label="ENSMUSG00000060548" cy:nodeId="1205">
    <graphics y="-247.53744914472034" x="-56.14997754022373" z="0.0"/>
  </node>
  <node id="44784" label="ENSMUSG00000060519" cy:nodeId="1206">
    <graphics y="-359.1050130862568" x="-237.7818055525986" z="0.0"/>
  </node>
  <node id="44785" label="ENSMUSG00000061414" cy:nodeId="1719">
    <graphics y="-112.20572092879767" x="76.10089855275349" z="0.0"/>
  </node>
  <node id="44786" label="ENSMUSG00000058216" cy:nodeId="1209">
    <graphics y="-362.0220731817193" x="-299.3413382674753" z="0.0"/>
  </node>
  <node id="44787" label="ENSMUSG00000060063" cy:nodeId="1721">
    <graphics y="-364.15499929330286" x="92.87549749556413" z="0.0"/>
  </node>
  <node id="44788" label="ENSMUSG00000054200" cy:nodeId="1212">
    <graphics y="21.059440606876638" x="-5.042491968287511" z="0.0"/>
  </node>
  <node id="44789" label="ENSMUSG00000059013" cy:nodeId="1725">
    <graphics y="142.7487344294169" x="-181.95500840025605" z="0.0"/>
  </node>
  <node id="44790" label="ENSMUSG00000058799" cy:nodeId="1727">
    <graphics y="-377.2667543994379" x="-33.213408540754514" z="0.0"/>
  </node>
  <node id="44791" label="ENSMUSG00000058145" cy:nodeId="1729">
    <graphics y="-482.71218733623215" x="-64.12342680553678" z="0.0"/>
  </node>
  <node id="44792" label="ENSMUSG00000049723" cy:nodeId="1218">
    <graphics y="-202.17335291212163" x="74.80615858590602" z="0.0"/>
  </node>
  <node id="44793" label="ENSMUSG00000055612" cy:nodeId="1740">
    <graphics y="-176.7395244043815" x="20.102849091892224" z="0.0"/>
  </node>
  <node id="44794" label="ENSMUSG00000047139" cy:nodeId="1230">
    <graphics y="-378.21200310282825" x="-97.82097016661568" z="0.0"/>
  </node>
  <node id="44795" label="ENSMUSG00000054920" cy:nodeId="1742">
    <graphics y="-261.08533856004783" x="-302.2211065258282" z="0.0"/>
  </node>
  <node id="44796" label="ENSMUSG00000046711" cy:nodeId="1231">
    <graphics y="-205.59497251484868" x="120.38529004434525" z="0.0"/>
  </node>
  <node id="44797" label="ENSMUSG00000054717" cy:nodeId="1744">
    <graphics y="20.762619000539416" x="-108.53493740820198" z="0.0"/>
  </node>
  <node id="44798" label="ENSMUSG00000054612" cy:nodeId="1745">
    <graphics y="-104.86168531154578" x="-384.41520642467395" z="0.0"/>
  </node>
  <node id="44800" label="ENSMUSG00000054342" cy:nodeId="1746">
    <graphics y="-334.79012712408775" x="9.558675700044859" z="0.0"/>
  </node>
  <node id="44799" label="ENSMUSG00000045817" cy:nodeId="1234">
    <graphics y="-123.25106863407038" x="124.82777903526659" z="0.0"/>
  </node>
  <node id="44801" label="ENSMUSG00000054321" cy:nodeId="1747">
    <graphics y="-149.50002889621922" x="258.5825713355738" z="0.0"/>
  </node>
  <node id="44802" label="ENSMUSG00000053581" cy:nodeId="1748">
    <graphics y="-16.916789592065413" x="-112.6044949410838" z="0.0"/>
  </node>
  <node id="44803" label="ENSMUSG00000044456" cy:nodeId="1237">
    <graphics y="-256.7953491385329" x="-95.57051548755103" z="0.0"/>
  </node>
  <node id="44804" label="ENSMUSG00000043953" cy:nodeId="1239">
    <graphics y="-119.97524861544537" x="230.98070212986954" z="0.0"/>
  </node>
  <node id="44805" label="ENSMUSG00000053334" cy:nodeId="1752">
    <graphics y="22.195390973092472" x="-10.483883611932981" z="0.0"/>
  </node>
  <node id="44806" label="ENSMUSG00000043391" cy:nodeId="1242">
    <graphics y="-324.2844880344623" x="82.20012226601332" z="0.0"/>
  </node>
  <node id="44807" label="ENSMUSG00000052331" cy:nodeId="1755">
    <graphics y="-121.2339194984042" x="180.3405908775374" z="0.0"/>
  </node>
  <node id="44809" label="ENSMUSG00000042109" cy:nodeId="1244">
    <graphics y="-329.9100298388422" x="-166.94014318360377" z="0.0"/>
  </node>
  <node id="44808" label="ENSMUSG00000052135" cy:nodeId="1756">
    <graphics y="73.75892998267756" x="-89.0910639933077" z="0.0"/>
  </node>
  <node id="44810" label="ENSMUSG00000052087" cy:nodeId="1758">
    <graphics y="-355.356893965171" x="-27.707491591161038" z="0.0"/>
  </node>
  <node id="44811" label="ENSMUSG00000039676" cy:nodeId="1252">
    <graphics y="-270.12097578565795" x="182.00774693273596" z="0.0"/>
  </node>
  <node id="44812" label="ENSMUSG00000038745" cy:nodeId="1254">
    <graphics y="132.14358298466743" x="161.4209236253094" z="0.0"/>
  </node>
  <node id="44813" label="ENSMUSG00000049907" cy:nodeId="1768">
    <graphics y="-176.06111706322727" x="291.92674168923094" z="0.0"/>
  </node>
  <node id="44814" label="ENSMUSG00000048965" cy:nodeId="1772">
    <graphics y="18.150809479672283" x="212.14275041341818" z="0.0"/>
  </node>
  <node id="44815" label="ENSMUSG00000048148" cy:nodeId="1776">
    <graphics y="170.6083087935979" x="-165.84817758605033" z="0.0"/>
  </node>
  <node id="44816" label="ENSMUSG00000048058" cy:nodeId="1777">
    <graphics y="57.85408291526191" x="88.92061993142221" z="0.0"/>
  </node>
  <node id="44817" label="ENSMUSG00000047986" cy:nodeId="1778">
    <graphics y="-43.67005388238246" x="-58.566766355289374" z="0.0"/>
  </node>
  <node id="44818" label="ENSMUSG00000035561" cy:nodeId="1268">
    <graphics y="-403.7675250798185" x="-177.75735171168984" z="0.0"/>
  </node>
  <node id="44819" label="ENSMUSG00000047534" cy:nodeId="1783">
    <graphics y="-416.80547556864633" x="-239.14542073030873" z="0.0"/>
  </node>
  <node id="44820" label="ENSMUSG00000033684" cy:nodeId="1272">
    <graphics y="-291.79886551009776" x="144.82633159793096" z="0.0"/>
  </node>
  <node id="44821" label="ENSMUSG00000032549" cy:nodeId="1275">
    <graphics y="-146.7542339421829" x="-398.2170384853071" z="0.0"/>
  </node>
  <node id="44822" label="ENSMUSG00000037621" cy:nodeId="763">
    <graphics y="-15.03715585772349" x="-30.15037142499743" z="0.0"/>
  </node>
  <node id="44823" label="ENSMUSG00000047044" cy:nodeId="1790">
    <graphics y="-447.69010708586455" x="-128.00767663182046" z="0.0"/>
  </node>
  <node id="44824" label="ENSMUSG00000047003" cy:nodeId="1791">
    <graphics y="-412.96305963390984" x="113.59480756515487" z="0.0"/>
  </node>
  <node id="44825" label="ENSMUSG00000030263" cy:nodeId="1282">
    <graphics y="-461.79282290292906" x="7.563045783040501" z="0.0"/>
  </node>
  <node id="44826" label="ENSMUSG00000036995" cy:nodeId="771">
    <graphics y="21.964603056075475" x="-114.98984348475295" z="0.0"/>
  </node>
  <node id="44827" label="ENSMUSG00000084797" cy:nodeId="260">
    <graphics y="-214.9820666391437" x="214.03824517474317" z="0.0"/>
  </node>
  <node id="44828" label="ENSMUSG00000045932" cy:nodeId="1796">
    <graphics y="-43.17272678524206" x="-259.65747097822634" z="0.0"/>
  </node>
  <node id="44829" label="ENSMUSG00000028972" cy:nodeId="1288">
    <graphics y="-390.2830762233132" x="-75.4730245823867" z="0.0"/>
  </node>
  <node id="44830" label="ENSMUSG00000028076" cy:nodeId="1292">
    <graphics y="-213.6638715648075" x="-292.03702978298" z="0.0"/>
  </node>
  <node id="44831" label="ENSMUSG00000027890" cy:nodeId="1296">
    <graphics y="45.609510376116624" x="-292.24049516657584" z="0.0"/>
  </node>
  <node id="44832" label="ENSMUSG00000043004" cy:nodeId="1809">
    <graphics y="-266.161086626914" x="164.03996800086725" z="0.0"/>
  </node>
  <node id="44833" label="ENSMUSG00000026955" cy:nodeId="1299">
    <graphics y="221.5069961280713" x="-78.30650855545547" z="0.0"/>
  </node>
  <node id="44834" label="ENSMUSG00000026815" cy:nodeId="1300">
    <graphics y="-153.44021939153527" x="-66.14514145327125" z="0.0"/>
  </node>
  <node id="44835" label="ENSMUSG00000026102" cy:nodeId="1304">
    <graphics y="-325.9524662184774" x="118.3303552540815" z="0.0"/>
  </node>
  <node id="44836" label="ENSMUSG00000041498" cy:nodeId="1816">
    <graphics y="-407.5144240336496" x="-7.835181242576624" z="0.0"/>
  </node>
  <node id="44837" label="ENSMUSG00000041064" cy:nodeId="1820">
    <graphics y="56.261505600149185" x="193.5927640274848" z="0.0"/>
  </node>
  <node id="44838" label="ENSMUSG00000040918" cy:nodeId="1821">
    <graphics y="92.6429648451082" x="154.48557904089844" z="0.0"/>
  </node>
  <node id="44839" label="ENSMUSG00000025059" cy:nodeId="1310">
    <graphics y="189.0387619271292" x="-60.21977923080003" z="0.0"/>
  </node>
  <node id="44840" label="ENSMUSG00000040860" cy:nodeId="1822">
    <graphics y="25.087237911618644" x="109.46162439248185" z="0.0"/>
  </node>
  <node id="44841" label="ENSMUSG00000034472" cy:nodeId="799">
    <graphics y="-187.16630902539947" x="-320.29442773847313" z="0.0"/>
  </node>
  <node id="44842" label="ENSMUSG00000040723" cy:nodeId="1824">
    <graphics y="134.20077719633852" x="-189.9799813202696" z="0.0"/>
  </node>
  <node id="44843" label="ENSMUSG00000040710" cy:nodeId="1825">
    <graphics y="-358.5172248544975" x="-290.54646331478654" z="0.0"/>
  </node>
  <node id="44844" label="ENSMUSG00000024621" cy:nodeId="1314">
    <graphics y="207.63029993036304" x="17.888806705265395" z="0.0"/>
  </node>
  <node id="44845" label="ENSMUSG00000034112" cy:nodeId="802">
    <graphics y="-367.12198953753295" x="-202.0419485553527" z="0.0"/>
  </node>
  <node id="44846" label="ENSMUSG00000033871" cy:nodeId="803">
    <graphics y="-291.536178303616" x="-18.574193288441883" z="0.0"/>
  </node>
  <node id="44847" label="ENSMUSG00000033222" cy:nodeId="810">
    <graphics y="-164.0742785929937" x="232.6442150195036" z="0.0"/>
  </node>
  <node id="44848" label="ENSMUSG00000039982" cy:nodeId="1834">
    <graphics y="-213.40324048166528" x="-237.37874919034113" z="0.0"/>
  </node>
  <node id="44849" label="ENSMUSG00000039814" cy:nodeId="1835">
    <graphics y="-207.33394709237837" x="95.78674988839296" z="0.0"/>
  </node>
  <node id="44850" label="ENSMUSG00000021281" cy:nodeId="1324">
    <graphics y="-59.836499944450566" x="176.9553789488014" z="0.0"/>
  </node>
  <node id="44851" label="ENSMUSG00000039683" cy:nodeId="1837">
    <graphics y="-89.66654959734589" x="255.71348884348208" z="0.0"/>
  </node>
  <node id="44852" label="ENSMUSG00000039621" cy:nodeId="1838">
    <graphics y="-407.6635114726801" x="-23.062078433226652" z="0.0"/>
  </node>
  <node id="44853" label="ENSMUSG00000039270" cy:nodeId="1841">
    <graphics y="-353.90259779042765" x="-192.96159636282303" z="0.0"/>
  </node>
  <node id="44854" label="ENSMUSG00000039158" cy:nodeId="1844">
    <graphics y="-222.26093297306448" x="-64.98976748981988" z="0.0"/>
  </node>
  <node id="44855" label="ENSMUSG00000039157" cy:nodeId="1845">
    <graphics y="143.33291726668904" x="-143.7927538313377" z="0.0"/>
  </node>
  <node id="44856" label="ENSMUSG00000015396" cy:nodeId="1335">
    <graphics y="-62.868962379741426" x="-317.9164148600797" z="0.0"/>
  </node>
  <node id="44857" label="ENSMUSG00000039126" cy:nodeId="1847">
    <graphics y="74.7522777443514" x="65.3687398290369" z="0.0"/>
  </node>
  <node id="44858" label="ENSMUSG00000039050" cy:nodeId="1850">
    <graphics y="-388.25015419928735" x="94.88508768448423" z="0.0"/>
  </node>
  <node id="44859" label="ENSMUSG00000032278" cy:nodeId="828">
    <graphics y="-52.8197559908544" x="-227.14346716936603" z="0.0"/>
  </node>
  <node id="44860" label="ENSMUSG00000032238" cy:nodeId="829">
    <graphics y="-127.04998914983697" x="-78.3162680932606" z="0.0"/>
  </node>
  <node id="44861" label="ENSMUSG00000004952" cy:nodeId="1344">
    <graphics y="-479.1290438440494" x="-71.67468298683231" z="0.0"/>
  </node>
  <node id="44862" label="ENSMUSG00000038175" cy:nodeId="1859">
    <graphics y="-19.814407879945353" x="-76.7410594730636" z="0.0"/>
  </node>
  <node id="44863" label="ENSMUSG00000038039" cy:nodeId="1861">
    <graphics y="-304.72529202816884" x="-225.3585297313013" z="0.0"/>
  </node>
  <node id="44864" label="ENSMUSG00000031849" cy:nodeId="841">
    <graphics y="155.390555887852" x="60.23263892522528" z="0.0"/>
  </node>
  <node id="44865" label="ENSMUSG00000017724" cy:nodeId="1354">
    <graphics y="-396.4738293448478" x="144.6994422647075" z="0.0"/>
  </node>
  <node id="44866" label="ENSMUSG00000037628" cy:nodeId="1866">
    <graphics y="54.97375363334042" x="-119.17176540872815" z="0.0"/>
  </node>
  <node id="44867" label="ENSMUSG00000037579" cy:nodeId="1868">
    <graphics y="77.88806922493013" x="2.7566831444901347" z="0.0"/>
  </node>
  <node id="44868" label="ENSMUSG00000037447" cy:nodeId="1869">
    <graphics y="-58.88225221285734" x="-302.0214552107799" z="0.0"/>
  </node>
  <node id="44869" label="ENSMUSG00000037306" cy:nodeId="1871">
    <graphics y="-32.41311988026207" x="-109.82285515366985" z="0.0"/>
  </node>
  <node id="44870" label="ENSMUSG00000037235" cy:nodeId="1872">
    <graphics y="89.10749175209511" x="8.474195644970749" z="0.0"/>
  </node>
  <node id="44871" label="ENSMUSG00000063568" cy:nodeId="1362">
    <graphics y="-295.2468415915446" x="-295.6200989330375" z="0.0"/>
  </node>
  <node id="44872" label="ENSMUSG00000062078" cy:nodeId="1363">
    <graphics y="-352.0016200545909" x="88.53470614160294" z="0.0"/>
  </node>
  <node id="44873" label="ENSMUSG00000036526" cy:nodeId="1877">
    <graphics y="-170.41887038660144" x="-223.2789382917543" z="0.0"/>
  </node>
  <node id="44874" label="ENSMUSG00000035901" cy:nodeId="1883">
    <graphics y="83.13685141284753" x="-78.23191816991417" z="0.0"/>
  </node>
  <node id="44875" label="ENSMUSG00000030935" cy:nodeId="859">
    <graphics y="-55.0315527025526" x="7.8075140019952265" z="0.0"/>
  </node>
  <node id="44876" label="ENSMUSG00000035486" cy:nodeId="1886">
    <graphics y="-445.06947326344243" x="42.1363527761197" z="0.0"/>
  </node>
  <node id="44877" label="ENSMUSG00000032356" cy:nodeId="1375">
    <graphics y="-21.3261633781543" x="244.6522323482992" z="0.0"/>
  </node>
  <node id="44878" label="ENSMUSG00000030543" cy:nodeId="863">
    <graphics y="110.26336157399311" x="59.510135898668665" z="0.0"/>
  </node>
  <node id="44879" label="ENSMUSG00000034883" cy:nodeId="1889">
    <graphics y="-241.40789798379535" x="-237.82276062452084" z="0.0"/>
  </node>
  <node id="44880" label="ENSMUSG00000030340" cy:nodeId="866">
    <graphics y="-15.940452771276753" x="-170.06444515685644" z="0.0"/>
  </node>
  <node id="44881" label="ENSMUSG00000034858" cy:nodeId="1890">
    <graphics y="194.9557768701102" x="115.5800142387513" z="0.0"/>
  </node>
  <node id="44882" label="ENSMUSG00000031586" cy:nodeId="1378">
    <graphics y="-412.38920992145347" x="-96.6712182463166" z="0.0"/>
  </node>
  <node id="44883" label="ENSMUSG00000034586" cy:nodeId="1893">
    <graphics y="-453.2746454232762" x="-13.894191591468953" z="0.0"/>
  </node>
  <node id="44884" label="ENSMUSG00000034317" cy:nodeId="1894">
    <graphics y="-176.98852704611969" x="88.60747595024263" z="0.0"/>
  </node>
  <node id="44885" label="ENSMUSG00000024743" cy:nodeId="1383">
    <graphics y="-399.23775563548736" x="74.71819862553085" z="0.0"/>
  </node>
  <node id="44886" label="ENSMUSG00000034116" cy:nodeId="1899">
    <graphics y="-188.6863175978824" x="151.2674745159087" z="0.0"/>
  </node>
  <node id="44887" label="ENSMUSG00000033530" cy:nodeId="1903">
    <graphics y="183.52806812750634" x="-80.0878321052606" z="0.0"/>
  </node>
  <node id="44888" label="ENSMUSG00000033287" cy:nodeId="1904">
    <graphics y="-247.40831421227466" x="265.0271158983222" z="0.0"/>
  </node>
  <node id="44889" label="ENSMUSG00000032965" cy:nodeId="1906">
    <graphics y="-312.50307456343506" x="-55.416999078085354" z="0.0"/>
  </node>
  <node id="44890" label="ENSMUSG00000029436" cy:nodeId="883">
    <graphics y="-25.199630483802444" x="266.71950712391845" z="0.0"/>
  </node>
  <node id="44891" label="ENSMUSG00000032783" cy:nodeId="1909">
    <graphics y="70.5840652803994" x="-203.99458575660697" z="0.0"/>
  </node>
  <node id="44892" label="ENSMUSG00000032656" cy:nodeId="1912">
    <graphics y="-184.58587280814973" x="-118.69445960671517" z="0.0"/>
  </node>
  <node id="44893" label="ENSMUSG00000032640" cy:nodeId="1913">
    <graphics y="36.33991359218904" x="154.9478519209298" z="0.0"/>
  </node>
  <node id="44894" label="ENSMUSG00000029096" cy:nodeId="891">
    <graphics y="-163.42813954967016" x="-337.3390960715442" z="0.0"/>
  </node>
  <node id="44895" label="ENSMUSG00000032373" cy:nodeId="1916">
    <graphics y="117.9222392072414" x="-53.9327455849798" z="0.0"/>
  </node>
  <node id="44896" label="ENSMUSG00000075702" cy:nodeId="1409">
    <graphics y="29.153460593824715" x="-72.10563021733597" z="0.0"/>
  </node>
  <node id="44897" label="ENSMUSG00000032254" cy:nodeId="1921">
    <graphics y="-49.97760541180962" x="-386.80457313202965" z="0.0"/>
  </node>
  <node id="44898" label="ENSMUSG00000072620" cy:nodeId="1410">
    <graphics y="-96.51258074571824" x="293.5080672973409" z="0.0"/>
  </node>
  <node id="44899" label="ENSMUSG00000070407" cy:nodeId="1413">
    <graphics y="-400.6759852808708" x="-143.93090539501637" z="0.0"/>
  </node>
  <node id="44900" label="ENSMUSG00000031903" cy:nodeId="1926">
    <graphics y="-42.84399515670046" x="-303.59956202281535" z="0.0"/>
  </node>
  <node id="44901" label="ENSMUSG00000031453" cy:nodeId="1931">
    <graphics y="-400.30039507071416" x="-108.21390326034064" z="0.0"/>
  </node>
  <node id="44902" label="ENSMUSG00000031367" cy:nodeId="1932">
    <graphics y="-286.1583652402484" x="-233.35860441084054" z="0.0"/>
  </node>
  <node id="44903" label="ENSMUSG00000030275" cy:nodeId="1941">
    <graphics y="176.615657680228" x="-48.89408705664505" z="0.0"/>
  </node>
  <node id="44904" label="ENSMUSG00000050395" cy:nodeId="1430">
    <graphics y="-233.44590388861957" x="-92.34076477963036" z="0.0"/>
  </node>
  <node id="44905" label="ENSMUSG00000049807" cy:nodeId="1432">
    <graphics y="-421.1701329525047" x="137.67186476583854" z="0.0"/>
  </node>
  <node id="44906" label="ENSMUSG00000030029" cy:nodeId="1944">
    <graphics y="-66.91874741366978" x="183.5531186262598" z="0.0"/>
  </node>
  <node id="44907" label="ENSMUSG00000029847" cy:nodeId="1947">
    <graphics y="-11.93376039579016" x="-359.9320176794412" z="0.0"/>
  </node>
  <node id="44908" label="ENSMUSG00000029650" cy:nodeId="1949">
    <graphics y="53.45981812790086" x="-202.45090218250428" z="0.0"/>
  </node>
  <node id="44909" label="ENSMUSG00000029516" cy:nodeId="1952">
    <graphics y="-207.48219326650565" x="143.05079988308484" z="0.0"/>
  </node>
  <node id="44910" label="ENSMUSG00000029470" cy:nodeId="1953">
    <graphics y="-49.267364529562535" x="-22.988730413057482" z="0.0"/>
  </node>
  <node id="44911" label="ENSMUSG00000029185" cy:nodeId="1958">
    <graphics y="-197.51398380343485" x="0.5160740612543577" z="0.0"/>
  </node>
  <node id="44912" label="ENSMUSG00000029166" cy:nodeId="1959">
    <graphics y="-189.91988812929617" x="-382.9121135670586" z="0.0"/>
  </node>
  <node id="44913" label="ENSMUSG00000039943" cy:nodeId="1448">
    <graphics y="-131.42672763692724" x="313.0372654151564" z="0.0"/>
  </node>
  <node id="44914" label="ENSMUSG00000029163" cy:nodeId="1960">
    <graphics y="-293.69281822323603" x="-323.27770706375856" z="0.0"/>
  </node>
  <node id="44915" label="ENSMUSG00000026610" cy:nodeId="938">
    <graphics y="-104.1072029598022" x="227.56637444236472" z="0.0"/>
  </node>
  <node id="44916" label="ENSMUSG00000028874" cy:nodeId="1962">
    <graphics y="-363.7359702690718" x="-324.39899051710927" z="0.0"/>
  </node>
  <node id="44917" label="ENSMUSG00000028832" cy:nodeId="1963">
    <graphics y="-170.45431177872894" x="-350.1518016310313" z="0.0"/>
  </node>
  <node id="44918" label="ENSMUSG00000028718" cy:nodeId="1964">
    <graphics y="68.22841641642651" x="-157.17266367557042" z="0.0"/>
  </node>
  <node id="44919" label="ENSMUSG00000026321" cy:nodeId="946">
    <graphics y="59.29979363203746" x="70.25420342126102" z="0.0"/>
  </node>
  <node id="44920" label="ENSMUSG00000028633" cy:nodeId="1970">
    <graphics y="-385.46253255980463" x="-251.41203580958373" z="0.0"/>
  </node>
  <node id="44921" label="ENSMUSG00000028614" cy:nodeId="1971">
    <graphics y="-333.3344521299059" x="-118.64585839737364" z="0.0"/>
  </node>
  <node id="44922" label="ENSMUSG00000026255" cy:nodeId="949">
    <graphics y="-279.8066430534515" x="-96.61225907498968" z="0.0"/>
  </node>
  <node id="44923" label="ENSMUSG00000028560" cy:nodeId="1974">
    <graphics y="93.4930587591358" x="-121.84507639849002" z="0.0"/>
  </node>
  <node id="44924" label="ENSMUSG00000028341" cy:nodeId="1976">
    <graphics y="-233.7850003546691" x="-225.34227107164332" z="0.0"/>
  </node>
  <node id="44925" label="ENSMUSG00000034353" cy:nodeId="1464">
    <graphics y="154.47095941522747" x="-109.58784105125409" z="0.0"/>
  </node>
  <node id="44926" label="ENSMUSG00000027994" cy:nodeId="1980">
    <graphics y="4.264597061144229" x="-195.89529545742863" z="0.0"/>
  </node>
  <node id="44927" label="ENSMUSG00000027878" cy:nodeId="1981">
    <graphics y="12.874454658132175" x="-231.5286763643669" z="0.0"/>
  </node>
  <node id="44928" label="ENSMUSG00000032120" cy:nodeId="1472">
    <graphics y="-229.09650478444325" x="31.0017566048542" z="0.0"/>
  </node>
  <node id="44929" label="ENSMUSG00000027654" cy:nodeId="1985">
    <graphics y="-57.70965051318332" x="-270.6954403208791" z="0.0"/>
  </node>
  <node id="44930" label="ENSMUSG00000027514" cy:nodeId="1988">
    <graphics y="157.34822210192277" x="95.22160658003061" z="0.0"/>
  </node>
  <node id="44931" label="ENSMUSG00000027454" cy:nodeId="1991">
    <graphics y="-483.1336357928508" x="-55.21722455013344" z="0.0"/>
  </node>
  <node id="44932" label="ENSMUSG00000027326" cy:nodeId="1992">
    <graphics y="-266.10863473687715" x="124.69270685937295" z="0.0"/>
  </node>
  <node id="44933" label="ENSMUSG00000029177" cy:nodeId="1482">
    <graphics y="-33.61100098659803" x="-263.5167315007109" z="0.0"/>
  </node>
  <node id="44934" label="ENSMUSG00000027009" cy:nodeId="1997">
    <graphics y="-186.45656567400817" x="-335.2496525224213" z="0.0"/>
  </node>
  <node id="44935" label="ENSMUSG00000026921" cy:nodeId="1999">
    <graphics y="-417.1585703665274" x="-93.6391465577716" z="0.0"/>
  </node>
  <node id="44936" label="ENSMUSG00000026879" cy:nodeId="2000">
    <graphics y="-21.832850786636143" x="-330.84637279391666" z="0.0"/>
  </node>
  <node id="44937" label="ENSMUSG00000026786" cy:nodeId="2001">
    <graphics y="49.250818537165486" x="-293.8307221468101" z="0.0"/>
  </node>
  <node id="44938" label="ENSMUSG00000026785" cy:nodeId="2002">
    <graphics y="59.95856567516113" x="13.82898861051315" z="0.0"/>
  </node>
  <node id="44939" label="ENSMUSG00000027456" cy:nodeId="1491">
    <graphics y="-151.5453689623816" x="76.83910444860352" z="0.0"/>
  </node>
  <node id="44940" label="ENSMUSG00000026728" cy:nodeId="2004">
    <graphics y="-482.1332825913871" x="45.55813979464098" z="0.0"/>
  </node>
  <node id="44941" label="ENSMUSG00000026605" cy:nodeId="2006">
    <graphics y="-332.5386982889512" x="91.37228743585453" z="0.0"/>
  </node>
  <node id="44942" label="ENSMUSG00000026509" cy:nodeId="2008">
    <graphics y="-270.1720408058047" x="-387.9586936356296" z="0.0"/>
  </node>
  <node id="44943" label="ENSMUSG00000026930" cy:nodeId="1496">
    <graphics y="-239.7192169894176" x="-181.8711994548325" z="0.0"/>
  </node>
  <node id="44944" label="ENSMUSG00000026864" cy:nodeId="1497">
    <graphics y="42.31587100020471" x="-77.36217151370289" z="0.0"/>
  </node>
  <node id="44945" label="ENSMUSG00000026429" cy:nodeId="2010">
    <graphics y="-91.40707821350138" x="129.8410268112138" z="0.0"/>
  </node>
  <node id="44946" label="ENSMUSG00000026480" cy:nodeId="1499">
    <graphics y="165.17385836102147" x="117.05447528539409" z="0.0"/>
  </node>
  <node id="44947" label="ENSMUSG00000026360" cy:nodeId="2011">
    <graphics y="-227.68522106020126" x="-133.46051275808642" z="0.0"/>
  </node>
  <node id="44948" label="ENSMUSG00000026281" cy:nodeId="2012">
    <graphics y="-84.53605619394202" x="-187.59720354460984" z="0.0"/>
  </node>
  <node id="44949" label="ENSMUSG00000025758" cy:nodeId="2015">
    <graphics y="-211.05027656119864" x="-257.0312975812824" z="0.0"/>
  </node>
  <node id="44950" label="ENSMUSG00000025584" cy:nodeId="2016">
    <graphics y="-167.10416516000296" x="-218.8090941382373" z="0.0"/>
  </node>
  <node id="44951" label="ENSMUSG00000025154" cy:nodeId="2020">
    <graphics y="22.68072821751982" x="8.04090126051559" z="0.0"/>
  </node>
  <node id="44952" label="ENSMUSG00000025019" cy:nodeId="2021">
    <graphics y="-53.23682908613356" x="-178.71188611886328" z="0.0"/>
  </node>
  <node id="44953" label="ENSMUSG00000024795" cy:nodeId="2027">
    <graphics y="94.16084324580052" x="73.3138981244169" z="0.0"/>
  </node>
  <node id="44954" label="ENSMUSG00000024644" cy:nodeId="2030">
    <graphics y="-117.86076385864783" x="-144.2613155868351" z="0.0"/>
  </node>
</graph>
