# Supplementary material for: Regulatory network analysis of Paneth cell and goblet cell enriched gut organoids using transcriptomics approaches
Source: Royal Society of Chemistry journal article supplement (doi:10.1039/c9mo00130a), 2019-12-10
Supplement: c9mo00130a2.cys [file c9mo00130a2.cys › CytoscapeSession-2019_09_26-21_57/views/21381-21528-1%3A+Cluster+1+%28Score%3A+8.022%29.xgmml]

<?xml version="1.0" encoding="UTF-8" standalone="yes"?>
<graph id="21528" label="21528" cy:view="1" cy:networkId="21381" cy:visualStyle="default" cy:rendererId="org.cytoscape.ding" cy:documentVersion="3.0" xmlns:dc="http://purl.org/dc/elements/1.1/" xmlns:xlink="http://www.w3.org/1999/xlink" xmlns:rdf="http://www.w3.org/1999/02/22-rdf-syntax-ns#" xmlns:cy="http://www.cytoscape.org" xmlns="http://www.cs.rpi.edu/XGMML">
  <graphics>
    <att name="NETWORK_CENTER_Z_LOCATION" value="0.0" type="string" cy:type="String"/>
    <att name="NETWORK_WIDTH" value="658.0" type="string" cy:type="String"/>
    <att name="NETWORK_HEIGHT" value="510.0" type="string" cy:type="String"/>
    <att name="NETWORK_DEPTH" value="0.0" type="string" cy:type="String"/>
    <att name="NETWORK_CENTER_X_LOCATION" value="234.97271728515625" type="string" cy:type="String"/>
    <att name="NETWORK_TITLE" value="" type="string" cy:type="String"/>
    <att name="NETWORK_SCALE_FACTOR" value="0.5700331140637646" type="string" cy:type="String"/>
    <att name="NETWORK_EDGE_SELECTION" value="true" type="string" cy:type="String"/>
    <att name="NETWORK_ANNOTATION_SELECTION" value="false" type="string" cy:type="String"/>
    <att name="NETWORK_CENTER_Y_LOCATION" value="231.4160614013672" type="string" cy:type="String"/>
    <att name="NETWORK_NODE_SELECTION" value="true" type="string" cy:type="String"/>
  </graphics>
  <node id="21751" label="ENSMUSG00000022773" cy:nodeId="1008">
    <graphics y="179.38987609473998" x="195.42393523301206" z="0.0"/>
  </node>
  <node id="21752" label="ENSMUSG00000020226" cy:nodeId="1521">
    <graphics y="220.96900341971522" x="-144.94867818709537" z="0.0"/>
  </node>
  <node id="21753" label="ENSMUSG00000024516" cy:nodeId="2035">
    <graphics y="-3.69297913136856" x="374.60974374280784" z="0.0"/>
  </node>
  <node id="21754" label="ENSMUSG00000024299" cy:nodeId="2037">
    <graphics y="377.1029585009709" x="303.05257999276995" z="0.0"/>
  </node>
  <node id="21755" label="ENSMUSG00000075012" cy:nodeId="502">
    <graphics y="430.3986991807601" x="337.0460263860536" z="0.0"/>
  </node>
  <node id="21756" label="ENSMUSG00000024193" cy:nodeId="2039">
    <graphics y="326.15864901353183" x="-89.21752431703479" z="0.0"/>
  </node>
  <node id="21757" label="ENSMUSG00000022211" cy:nodeId="1016">
    <graphics y="375.9409996941779" x="482.3696590311675" z="0.0"/>
  </node>
  <node id="21758" label="ENSMUSG00000013846" cy:nodeId="1528">
    <graphics y="247.90931522958365" x="-37.5251132119684" z="0.0"/>
  </node>
  <node id="21759" label="ENSMUSG00000007989" cy:nodeId="1529">
    <graphics y="-5.824534617080246" x="295.4216480115722" z="0.0"/>
  </node>
  <node id="21760" label="ENSMUSG00000074651" cy:nodeId="506">
    <graphics y="-39.72284662852246" x="556.3353636608775" z="0.0"/>
  </node>
  <node id="21761" label="ENSMUSG00000023272" cy:nodeId="2042">
    <graphics y="100.58151497510391" x="602.2069093788936" z="0.0"/>
  </node>
  <node id="21762" label="ENSMUSG00000004951" cy:nodeId="1532">
    <graphics y="399.5204350457593" x="543.2672924381725" z="0.0"/>
  </node>
  <node id="21763" label="ENSMUSG00000021986" cy:nodeId="1020">
    <graphics y="415.6451703313298" x="23.12657540822829" z="0.0"/>
  </node>
  <node id="21764" label="ENSMUSG00000003436" cy:nodeId="1533">
    <graphics y="-53.08476457664445" x="11.804839161781842" z="0.0"/>
  </node>
  <node id="21765" label="ENSMUSG00000021838" cy:nodeId="1022">
    <graphics y="591.7541565065621" x="416.7034913829284" z="0.0"/>
  </node>
  <node id="21766" label="ENSMUSG00000003283" cy:nodeId="1534">
    <graphics y="380.67035845031205" x="134.95685710132022" z="0.0"/>
  </node>
  <node id="21767" label="ENSMUSG00000001025" cy:nodeId="1535">
    <graphics y="470.0188843383415" x="382.3133271249399" z="0.0"/>
  </node>
  <node id="21768" label="ENSMUSG00000074183" cy:nodeId="1538">
    <graphics y="162.0944884466915" x="406.51523729492317" z="0.0"/>
  </node>
  <node id="21769" label="ENSMUSG00000072849" cy:nodeId="515">
    <graphics y="-162.06081900783047" x="232.3342132818346" z="0.0"/>
  </node>
  <node id="21770" label="ENSMUSG00000022945" cy:nodeId="2051">
    <graphics y="597.7147336131342" x="295.4339071885097" z="0.0"/>
  </node>
  <node id="21771" label="ENSMUSG00000021572" cy:nodeId="1027">
    <graphics y="521.8889779972274" x="354.2188836696165" z="0.0"/>
  </node>
  <node id="21772" label="ENSMUSG00000069814" cy:nodeId="1539">
    <graphics y="44.70577238316906" x="106.70495986951053" z="0.0"/>
  </node>
  <node id="21773" label="ENSMUSG00000069227" cy:nodeId="1540">
    <graphics y="206.94571419725216" x="576.9015087792179" z="0.0"/>
  </node>
  <node id="21774" label="ENSMUSG00000022912" cy:nodeId="2052">
    <graphics y="533.7189935636383" x="33.769413330363136" z="0.0"/>
  </node>
  <node id="21775" label="ENSMUSG00000022762" cy:nodeId="2055">
    <graphics y="425.0335981677579" x="-115.97230446218396" z="0.0"/>
  </node>
  <node id="21776" label="ENSMUSG00000071984" cy:nodeId="519">
    <graphics y="388.4733374043948" x="92.4505577339814" z="0.0"/>
  </node>
  <node id="21777" label="ENSMUSG00000021136" cy:nodeId="1034">
    <graphics y="339.91836003098416" x="596.279091436729" z="0.0"/>
  </node>
  <node id="21778" label="ENSMUSG00000071226" cy:nodeId="524">
    <graphics y="419.78772707870553" x="-30.615242308882443" z="0.0"/>
  </node>
  <node id="21779" label="ENSMUSG00000070687" cy:nodeId="525">
    <graphics y="278.85652404176363" x="391.628101192438" z="0.0"/>
  </node>
  <node id="21780" label="ENSMUSG00000020900" cy:nodeId="1037">
    <graphics y="300.39922466668816" x="64.65662654726933" z="0.0"/>
  </node>
  <node id="21781" label="ENSMUSG00000022253" cy:nodeId="2063">
    <graphics y="482.7589649171333" x="303.99071346753044" z="0.0"/>
  </node>
  <node id="21782" label="ENSMUSG00000028927" cy:nodeId="1553">
    <graphics y="-126.8298301932455" x="434.0350019435798" z="0.0"/>
  </node>
  <node id="21783" label="ENSMUSG00000022148" cy:nodeId="2065">
    <graphics y="86.53595307719272" x="499.90862591753836" z="0.0"/>
  </node>
  <node id="21784" label="ENSMUSG00000022003" cy:nodeId="2068">
    <graphics y="-55.42428876536857" x="18.19308757133126" z="0.0"/>
  </node>
  <node id="21785" label="ENSMUSG00000021876" cy:nodeId="2069">
    <graphics y="131.9458029045518" x="-63.20608770696239" z="0.0"/>
  </node>
  <node id="21786" label="ENSMUSG00000020571" cy:nodeId="1045">
    <graphics y="-8.994989787202272" x="522.1317547526094" z="0.0"/>
  </node>
  <node id="21787" label="ENSMUSG00000068154" cy:nodeId="534">
    <graphics y="318.8725280102293" x="236.7676973226319" z="0.0"/>
  </node>
  <node id="21788" label="ENSMUSG00000021831" cy:nodeId="2070">
    <graphics y="383.33569576431773" x="-113.09172743113231" z="0.0"/>
  </node>
  <node id="21789" label="ENSMUSG00000020462" cy:nodeId="1047">
    <graphics y="-98.08312059170646" x="362.65189988220334" z="0.0"/>
  </node>
  <node id="21790" label="ENSMUSG00000021391" cy:nodeId="2075">
    <graphics y="228.42614906675294" x="567.0340512721122" z="0.0"/>
  </node>
  <node id="21791" label="ENSMUSG00000026833" cy:nodeId="1565">
    <graphics y="-30.093784456389706" x="229.08065283731295" z="0.0"/>
  </node>
  <node id="21792" label="ENSMUSG00000025969" cy:nodeId="1566">
    <graphics y="56.38625148542594" x="142.26140696142937" z="0.0"/>
  </node>
  <node id="21793" label="ENSMUSG00000025938" cy:nodeId="1567">
    <graphics y="146.75971774985916" x="592.8124199448428" z="0.0"/>
  </node>
  <node id="21794" label="ENSMUSG00000020901" cy:nodeId="2080">
    <graphics y="193.16383485961103" x="61.56943003505967" z="0.0"/>
  </node>
  <node id="21795" label="ENSMUSG00000020151" cy:nodeId="1056">
    <graphics y="4.40797911872302" x="341.93388022269465" z="0.0"/>
  </node>
  <node id="21796" label="ENSMUSG00000020846" cy:nodeId="2083">
    <graphics y="183.56436024628312" x="-104.31929418719574" z="0.0"/>
  </node>
  <node id="21797" label="ENSMUSG00000070287" cy:nodeId="1573">
    <graphics y="617.3871542773256" x="253.97477572706262" z="0.0"/>
  </node>
  <node id="21798" label="ENSMUSG00000019992" cy:nodeId="1061">
    <graphics y="633.2981300545732" x="415.6366761635143" z="0.0"/>
  </node>
  <node id="21799" label="ENSMUSG00000020788" cy:nodeId="2085">
    <graphics y="-18.835156381887572" x="92.77667675771707" z="0.0"/>
  </node>
  <node id="21800" label="ENSMUSG00000019945" cy:nodeId="1063">
    <graphics y="417.76041155319183" x="559.0752857475802" z="0.0"/>
  </node>
  <node id="21801" label="ENSMUSG00000064090" cy:nodeId="1576">
    <graphics y="248.91556271048" x="343.3146233019829" z="0.0"/>
  </node>
  <node id="21802" label="ENSMUSG00000020649" cy:nodeId="2089">
    <graphics y="424.47429249193635" x="81.77090264677466" z="0.0"/>
  </node>
  <node id="21803" label="ENSMUSG00000059991" cy:nodeId="1578">
    <graphics y="3.1753286747258187" x="-32.25358476738987" z="0.0"/>
  </node>
  <node id="21804" label="ENSMUSG00000062210" cy:nodeId="554">
    <graphics y="417.658470504448" x="302.16450443694424" z="0.0"/>
  </node>
  <node id="21805" label="ENSMUSG00000019775" cy:nodeId="1068">
    <graphics y="499.72649095180077" x="468.60875763231076" z="0.0"/>
  </node>
  <node id="21806" label="ENSMUSG00000019235" cy:nodeId="1069">
    <graphics y="467.0510681227454" x="388.27083944714656" z="0.0"/>
  </node>
  <node id="21807" label="ENSMUSG00000020471" cy:nodeId="2093">
    <graphics y="451.99944296327203" x="511.99793804582214" z="0.0"/>
  </node>
  <node id="21808" label="ENSMUSG00000056531" cy:nodeId="1582">
    <graphics y="652.3116591973472" x="465.8351090730181" z="0.0"/>
  </node>
  <node id="21809" label="ENSMUSG00000018672" cy:nodeId="1072">
    <graphics y="-103.32832007901897" x="194.99328460778108" z="0.0"/>
  </node>
  <node id="21810" label="ENSMUSG00000053963" cy:nodeId="1584">
    <graphics y="545.8024297676245" x="278.80430879479036" z="0.0"/>
  </node>
  <node id="21811" label="ENSMUSG00000018554" cy:nodeId="1074">
    <graphics y="273.1936679979046" x="613.7634213312599" z="0.0"/>
  </node>
  <node id="21812" label="ENSMUSG00000059493" cy:nodeId="563">
    <graphics y="538.3934755730492" x="-14.357376443651589" z="0.0"/>
  </node>
  <node id="21813" label="ENSMUSG00000048970" cy:nodeId="1590">
    <graphics y="187.17791719164856" x="80.46265637221447" z="0.0"/>
  </node>
  <node id="21814" label="ENSMUSG00000019796" cy:nodeId="2102">
    <graphics y="263.3411786803462" x="321.9327531786187" z="0.0"/>
  </node>
  <node id="21815" label="ENSMUSG00000019303" cy:nodeId="2105">
    <graphics y="279.68829711570777" x="45.5856758353036" z="0.0"/>
  </node>
  <node id="21816" label="ENSMUSG00000017607" cy:nodeId="1081">
    <graphics y="304.918900801199" x="15.52752026942997" z="0.0"/>
  </node>
  <node id="21817" label="ENSMUSG00000057897" cy:nodeId="570">
    <graphics y="561.3808720947764" x="427.48504459450623" z="0.0"/>
  </node>
  <node id="21818" label="ENSMUSG00000046242" cy:nodeId="1594">
    <graphics y="291.20058453821184" x="336.012460208618" z="0.0"/>
  </node>
  <node id="21819" label="ENSMUSG00000017716" cy:nodeId="2110">
    <graphics y="-74.55254157740438" x="459.8764364355118" z="0.0"/>
  </node>
  <node id="21820" label="ENSMUSG00000017493" cy:nodeId="2112">
    <graphics y="422.90559499579336" x="-22.75117819855963" z="0.0"/>
  </node>
  <node id="21821" label="ENSMUSG00000039372" cy:nodeId="1603">
    <graphics y="53.08098242887664" x="508.9404054791478" z="0.0"/>
  </node>
  <node id="21822" label="ENSMUSG00000056050" cy:nodeId="580">
    <graphics y="229.39399934905046" x="-22.61021624048879" z="0.0"/>
  </node>
  <node id="21823" label="ENSMUSG00000014786" cy:nodeId="2119">
    <graphics y="319.4533081653047" x="530.3014479113511" z="0.0"/>
  </node>
  <node id="21824" label="ENSMUSG00000037580" cy:nodeId="1609">
    <graphics y="411.0171087507583" x="44.95098729558646" z="0.0"/>
  </node>
  <node id="21825" label="ENSMUSG00000010362" cy:nodeId="2122">
    <graphics y="461.63038753038944" x="339.8615938539456" z="0.0"/>
  </node>
  <node id="21826" label="ENSMUSG00000009292" cy:nodeId="2124">
    <graphics y="54.760792568544474" x="350.4322844495607" z="0.0"/>
  </node>
  <node id="21827" label="ENSMUSG00000035357" cy:nodeId="1613">
    <graphics y="460.0687109126059" x="275.3240270639253" z="0.0"/>
  </node>
  <node id="21828" label="ENSMUSG00000006386" cy:nodeId="1102">
    <graphics y="242.90393549650338" x="266.7894508176557" z="0.0"/>
  </node>
  <node id="21829" label="ENSMUSG00000055567" cy:nodeId="591">
    <graphics y="440.7639573228991" x="585.7842030944266" z="0.0"/>
  </node>
  <node id="21830" label="ENSMUSG00000034579" cy:nodeId="1618">
    <graphics y="417.9384449994466" x="-44.513118289845835" z="0.0"/>
  </node>
  <node id="21831" label="ENSMUSG00000003411" cy:nodeId="1109">
    <graphics y="379.60215784165496" x="447.90132221620695" z="0.0"/>
  </node>
  <node id="21832" label="ENSMUSG00000054630" cy:nodeId="598">
    <graphics y="355.3816562426796" x="-139.82377295144175" z="0.0"/>
  </node>
  <node id="21833" label="ENSMUSG00000003355" cy:nodeId="1110">
    <graphics y="551.2603160527835" x="-30.838041039991545" z="0.0"/>
  </node>
  <node id="21834" label="ENSMUSG00000005267" cy:nodeId="2134">
    <graphics y="476.2676810828472" x="143.32329590098672" z="0.0"/>
  </node>
  <node id="21835" label="ENSMUSG00000033307" cy:nodeId="1622">
    <graphics y="-110.98832765444274" x="281.03995366883737" z="0.0"/>
  </node>
  <node id="21836" label="ENSMUSG00000054555" cy:nodeId="599">
    <graphics y="65.20494102603787" x="426.38754496156025" z="0.0"/>
  </node>
  <node id="21837" label="ENSMUSG00000003992" cy:nodeId="2136">
    <graphics y="53.13539485244678" x="-74.51051653686763" z="0.0"/>
  </node>
  <node id="21838" label="ENSMUSG00000003545" cy:nodeId="2137">
    <graphics y="441.3386855845067" x="192.8931191881631" z="0.0"/>
  </node>
  <node id="21839" label="ENSMUSG00000031791" cy:nodeId="1627">
    <graphics y="-144.33617483766145" x="148.28738573188375" z="0.0"/>
  </node>
  <node id="21840" label="ENSMUSG00000053765" cy:nodeId="604">
    <graphics y="295.9396595626558" x="354.99007642355275" z="0.0"/>
  </node>
  <node id="21841" label="ENSMUSG00000031788" cy:nodeId="1628">
    <graphics y="-24.80105952047129" x="183.4836151302209" z="0.0"/>
  </node>
  <node id="21842" label="ENSMUSG00000031760" cy:nodeId="1629">
    <graphics y="560.9062724317178" x="373.52900993522684" z="0.0"/>
  </node>
  <node id="21843" label="ENSMUSG00000001525" cy:nodeId="1118">
    <graphics y="-95.67854418794741" x="448.61906404587353" z="0.0"/>
  </node>
  <node id="21844" label="ENSMUSG00000031757" cy:nodeId="1630">
    <graphics y="413.36071222625895" x="193.81756192051625" z="0.0"/>
  </node>
  <node id="21845" label="ENSMUSG00000002870" cy:nodeId="2143">
    <graphics y="318.9672445904481" x="195.53689859085267" z="0.0"/>
  </node>
  <node id="21846" label="ENSMUSG00000002835" cy:nodeId="2144">
    <graphics y="-189.47951653970637" x="239.9683699454406" z="0.0"/>
  </node>
  <node id="21847" label="ENSMUSG00000002565" cy:nodeId="2145">
    <graphics y="220.8283287065055" x="550.4085117519445" z="0.0"/>
  </node>
  <node id="21848" label="ENSMUSG00000052921" cy:nodeId="612">
    <graphics y="513.8676352069925" x="501.1346509494187" z="0.0"/>
  </node>
  <node id="21849" label="ENSMUSG00000027273" cy:nodeId="1636">
    <graphics y="456.94136481937005" x="105.58533684439992" z="0.0"/>
  </node>
  <node id="21850" label="ENSMUSG00000001120" cy:nodeId="2149">
    <graphics y="454.25081473400786" x="433.2198733411851" z="0.0"/>
  </node>
  <node id="21851" label="ENSMUSG00000000594" cy:nodeId="2150">
    <graphics y="632.3571666613453" x="247.39008533240124" z="0.0"/>
  </node>
  <node id="21852" label="ENSMUSG00000000253" cy:nodeId="1126">
    <graphics y="147.23691344085086" x="609.0578051326413" z="0.0"/>
  </node>
  <node id="21853" label="ENSMUSG00000026398" cy:nodeId="2154">
    <graphics y="274.3067205271347" x="186.0648083549018" z="0.0"/>
  </node>
  <node id="21854" label="ENSMUSG00000025064" cy:nodeId="1644">
    <graphics y="341.1035145481435" x="67.29040727176545" z="0.0"/>
  </node>
  <node id="21855" label="ENSMUSG00000051314" cy:nodeId="621">
    <graphics y="167.29141227187682" x="49.4588480072845" z="0.0"/>
  </node>
  <node id="21856" label="ENSMUSG00000051251" cy:nodeId="622">
    <graphics y="612.131774756308" x="343.9140046254529" z="0.0"/>
  </node>
  <node id="21857" label="ENSMUSG00000063810" cy:nodeId="1134">
    <graphics y="207.2326998579489" x="-83.92166405088385" z="0.0"/>
  </node>
  <node id="21858" label="ENSMUSG00000054582" cy:nodeId="1135">
    <graphics y="50.57216311496262" x="390.40638651050017" z="0.0"/>
  </node>
  <node id="21859" label="ENSMUSG00000022769" cy:nodeId="1649">
    <graphics y="373.89278337781883" x="200.0470828826911" z="0.0"/>
  </node>
  <node id="21860" label="ENSMUSG00000041168" cy:nodeId="1138">
    <graphics y="568.987272182034" x="486.77868676681067" z="0.0"/>
  </node>
  <node id="21861" label="ENSMUSG00000050824" cy:nodeId="627">
    <graphics y="305.7926292259698" x="524.0052211864304" z="0.0"/>
  </node>
  <node id="21862" label="ENSMUSG00000040046" cy:nodeId="1140">
    <graphics y="406.0200393746028" x="548.9183354722409" z="0.0"/>
  </node>
  <node id="21863" label="ENSMUSG00000021846" cy:nodeId="1652">
    <graphics y="14.304338165132052" x="127.36434179245305" z="0.0"/>
  </node>
  <node id="21864" label="ENSMUSG00000034818" cy:nodeId="1143">
    <graphics y="133.03039958084912" x="374.4777571261857" z="0.0"/>
  </node>
  <node id="21865" label="ENSMUSG00000028693" cy:nodeId="1146">
    <graphics y="364.6578290255358" x="-84.81552479554927" z="0.0"/>
  </node>
  <node id="21866" label="ENSMUSG00000017499" cy:nodeId="2170">
    <graphics y="316.438699786682" x="-71.6272488631832" z="0.0"/>
  </node>
  <node id="21867" label="ENSMUSG00000014164" cy:nodeId="1660">
    <graphics y="238.54310462134652" x="429.6852487585276" z="0.0"/>
  </node>
  <node id="21868" label="ENSMUSG00000010830" cy:nodeId="1661">
    <graphics y="180.5574767832489" x="541.2929911909343" z="0.0"/>
  </node>
  <node id="21869" label="ENSMUSG00000002055" cy:nodeId="1153">
    <graphics y="167.95489695263757" x="43.75861660575571" z="0.0"/>
  </node>
  <node id="21870" label="ENSMUSG00000000125" cy:nodeId="1154">
    <graphics y="442.1575642845684" x="-79.46086510715634" z="0.0"/>
  </node>
  <node id="21871" label="ENSMUSG00000058070" cy:nodeId="1158">
    <graphics y="296.5794802265528" x="213.94487130998067" z="0.0"/>
  </node>
  <node id="21872" label="ENSMUSG00000049154" cy:nodeId="1160">
    <graphics y="-30.778674671026792" x="266.44009476991624" z="0.0"/>
  </node>
  <node id="21873" label="ENSMUSG00000047963" cy:nodeId="650">
    <graphics y="280.35578120512594" x="520.7822067937221" z="0.0"/>
  </node>
  <node id="21874" label="ENSMUSG00000000214" cy:nodeId="1675">
    <graphics y="455.3366706251832" x="110.98433417323338" z="0.0"/>
  </node>
  <node id="21875" label="ENSMUSG00000022346" cy:nodeId="2188">
    <graphics y="247.0792027637034" x="219.1621301335294" z="0.0"/>
  </node>
  <node id="21876" label="ENSMUSG00000047473" cy:nodeId="653">
    <graphics y="-144.57709097792193" x="349.1532211395678" z="0.0"/>
  </node>
  <node id="21877" label="ENSMUSG00000110206" cy:nodeId="1677">
    <graphics y="402.5555871394028" x="345.8002916838665" z="0.0"/>
  </node>
  <node id="21878" label="ENSMUSG00000046841" cy:nodeId="655">
    <graphics y="139.62014251500915" x="281.5222398264634" z="0.0"/>
  </node>
  <node id="21879" label="ENSMUSG00000096847" cy:nodeId="1680">
    <graphics y="327.5359959861991" x="218.79993706541057" z="0.0"/>
  </node>
  <node id="21880" label="ENSMUSG00000094928" cy:nodeId="1681">
    <graphics y="254.1585904606363" x="236.5031730943947" z="0.0"/>
  </node>
  <node id="21881" label="ENSMUSG00000031790" cy:nodeId="1172">
    <graphics y="289.1766228618057" x="493.01638327794427" z="0.0"/>
  </node>
  <node id="21882" label="ENSMUSG00000078773" cy:nodeId="1686">
    <graphics y="501.9254446532884" x="401.2576931456268" z="0.0"/>
  </node>
  <node id="21883" label="ENSMUSG00000029420" cy:nodeId="1174">
    <graphics y="428.3237837638896" x="460.4933292208848" z="0.0"/>
  </node>
  <node id="21884" label="ENSMUSG00000025876" cy:nodeId="1175">
    <graphics y="155.31409638112137" x="441.2019688871013" z="0.0"/>
  </node>
  <node id="21885" label="ENSMUSG00000046204" cy:nodeId="664">
    <graphics y="278.83936073270263" x="139.4360877294361" z="0.0"/>
  </node>
  <node id="21886" label="ENSMUSG00000024175" cy:nodeId="1177">
    <graphics y="315.88436304086207" x="-36.45022582955146" z="0.0"/>
  </node>
  <node id="21887" label="ENSMUSG00000074892" cy:nodeId="1692">
    <graphics y="421.99811112110706" x="249.2197802212925" z="0.0"/>
  </node>
  <node id="21888" label="ENSMUSG00000074802" cy:nodeId="1693">
    <graphics y="596.6202852979769" x="135.9519998177986" z="0.0"/>
  </node>
  <node id="21530" label="ENSMUSG00000010825" cy:nodeId="1182">
    <graphics y="461.8569372830492" x="99.41466196892611" z="0.0"/>
  </node>
  <node id="21531" label="ENSMUSG00000045790" cy:nodeId="671">
    <graphics y="218.23869275640376" x="73.73628365586931" z="0.0"/>
  </node>
  <node id="21532" label="ENSMUSG00000073409" cy:nodeId="1700">
    <graphics y="77.92912431531023" x="151.149653447062" z="0.0"/>
  </node>
  <node id="21534" label="ENSMUSG00000074896" cy:nodeId="1189">
    <graphics y="528.6991449572237" x="286.8294117767001" z="0.0"/>
  </node>
  <node id="21533" label="ENSMUSG00000072235" cy:nodeId="1701">
    <graphics y="299.81765526071973" x="403.98467410136436" z="0.0"/>
  </node>
  <node id="21536" label="ENSMUSG00000072115" cy:nodeId="1702">
    <graphics y="51.63358239208418" x="155.13926201885795" z="0.0"/>
  </node>
  <node id="21535" label="ENSMUSG00000044646" cy:nodeId="678">
    <graphics y="523.5413860794744" x="266.51493265750565" z="0.0"/>
  </node>
  <node id="21537" label="ENSMUSG00000044626" cy:nodeId="679">
    <graphics y="74.21678109296896" x="484.7230931481409" z="0.0"/>
  </node>
  <node id="21538" label="ENSMUSG00000070802" cy:nodeId="1704">
    <graphics y="459.84832833216615" x="455.35810739167846" z="0.0"/>
  </node>
  <node id="21540" label="ENSMUSG00000069805" cy:nodeId="1195">
    <graphics y="-112.61692813212605" x="287.8296768909501" z="0.0"/>
  </node>
  <node id="21539" label="ENSMUSG00000070498" cy:nodeId="1707">
    <graphics y="373.6615842567645" x="373.7932349682252" z="0.0"/>
  </node>
  <node id="21541" label="ENSMUSG00000069910" cy:nodeId="1709">
    <graphics y="7.2295048515703115" x="491.7299231422222" z="0.0"/>
  </node>
  <node id="21542" label="ENSMUSG00000067813" cy:nodeId="1710">
    <graphics y="315.006911552691" x="462.5466251734024" z="0.0"/>
  </node>
  <node id="21543" label="ENSMUSG00000043015" cy:nodeId="688">
    <graphics y="-25.985458102562347" x="344.44276673340136" z="0.0"/>
  </node>
  <node id="21544" label="ENSMUSG00000062760" cy:nodeId="1713">
    <graphics y="43.27095339710501" x="486.2341455131299" z="0.0"/>
  </node>
  <node id="21545" label="ENSMUSG00000042842" cy:nodeId="690">
    <graphics y="145.42546519202793" x="-166.39611781370334" z="0.0"/>
  </node>
  <node id="21546" label="ENSMUSG00000065952" cy:nodeId="1202">
    <graphics y="563.1560752426018" x="254.02766275774087" z="0.0"/>
  </node>
  <node id="21547" label="ENSMUSG00000062248" cy:nodeId="1714">
    <graphics y="263.5893012532634" x="-73.47587575382506" z="0.0"/>
  </node>
  <node id="21548" label="ENSMUSG00000042804" cy:nodeId="691">
    <graphics y="204.753924081681" x="628.8826164114049" z="0.0"/>
  </node>
  <node id="21549" label="ENSMUSG00000061607" cy:nodeId="1718">
    <graphics y="299.68353509897236" x="538.6526000530843" z="0.0"/>
  </node>
  <node id="21550" label="ENSMUSG00000060550" cy:nodeId="1720">
    <graphics y="183.08253749875297" x="359.7815253698912" z="0.0"/>
  </node>
  <node id="21551" label="ENSMUSG00000059939" cy:nodeId="1722">
    <graphics y="-153.94615038512427" x="316.31045717350753" z="0.0"/>
  </node>
  <node id="21552" label="ENSMUSG00000059713" cy:nodeId="1723">
    <graphics y="290.7987679988765" x="339.1344707176508" z="0.0"/>
  </node>
  <node id="21553" label="ENSMUSG00000041801" cy:nodeId="705">
    <graphics y="292.480258523221" x="29.243174167806856" z="0.0"/>
  </node>
  <node id="21554" label="ENSMUSG00000058006" cy:nodeId="1731">
    <graphics y="616.6514755762664" x="109.19935724485777" z="0.0"/>
  </node>
  <node id="21555" label="ENSMUSG00000049436" cy:nodeId="1220">
    <graphics y="15.095276859238382" x="177.66366198117439" z="0.0"/>
  </node>
  <node id="21556" label="ENSMUSG00000041688" cy:nodeId="709">
    <graphics y="331.4332517604146" x="-95.57206726500124" z="0.0"/>
  </node>
  <node id="21557" label="ENSMUSG00000057137" cy:nodeId="1733">
    <graphics y="16.213642167722355" x="488.43064305047017" z="0.0"/>
  </node>
  <node id="21558" label="ENSMUSG00000057069" cy:nodeId="1734">
    <graphics y="594.7760960595665" x="264.0138009143412" z="0.0"/>
  </node>
  <node id="21559" label="ENSMUSG00000056888" cy:nodeId="1735">
    <graphics y="229.81362226074998" x="-74.58431717783816" z="0.0"/>
  </node>
  <node id="21560" label="ENSMUSG00000056602" cy:nodeId="1736">
    <graphics y="416.3326584164445" x="544.3072592855488" z="0.0"/>
  </node>
  <node id="21561" label="ENSMUSG00000041420" cy:nodeId="714">
    <graphics y="-93.84207547194771" x="221.86645822756097" z="0.0"/>
  </node>
  <node id="21562" label="ENSMUSG00000055805" cy:nodeId="1739">
    <graphics y="451.2992187705153" x="34.70632898493896" z="0.0"/>
  </node>
  <node id="21563" label="ENSMUSG00000041351" cy:nodeId="716">
    <graphics y="474.74344552454784" x="255.86948383565277" z="0.0"/>
  </node>
  <node id="21564" label="ENSMUSG00000047181" cy:nodeId="1229">
    <graphics y="-10.708659527251584" x="163.0635508399414" z="0.0"/>
  </node>
  <node id="21565" label="ENSMUSG00000041268" cy:nodeId="719">
    <graphics y="100.40376260773054" x="121.98454496879651" z="0.0"/>
  </node>
  <node id="21566" label="ENSMUSG00000046410" cy:nodeId="1232">
    <graphics y="49.15500744776935" x="408.70683030916797" z="0.0"/>
  </node>
  <node id="21567" label="ENSMUSG00000053580" cy:nodeId="1749">
    <graphics y="419.1598389324795" x="186.74177886538695" z="0.0"/>
  </node>
  <node id="21568" label="ENSMUSG00000053414" cy:nodeId="1751">
    <graphics y="355.7282918261472" x="224.99806437889566" z="0.0"/>
  </node>
  <node id="21569" label="ENSMUSG00000040433" cy:nodeId="728">
    <graphics y="477.0535040964131" x="123.04288066641709" z="0.0"/>
  </node>
  <node id="21570" label="ENSMUSG00000052384" cy:nodeId="1754">
    <graphics y="198.69775289080093" x="-69.50205156631952" z="0.0"/>
  </node>
  <node id="21571" label="mmu-miR-1945" cy:nodeId="221">
    <graphics y="176.77906101046452" x="514.6674916915625" z="0.0"/>
  </node>
  <node id="21572" label="ENSMUSG00000052117" cy:nodeId="1757">
    <graphics y="-62.14441598765984" x="367.72822513200305" z="0.0"/>
  </node>
  <node id="21573" label="ENSMUSG00000041202" cy:nodeId="1247">
    <graphics y="390.8590257682061" x="352.7855607023428" z="0.0"/>
  </node>
  <node id="21574" label="ENSMUSG00000040717" cy:nodeId="1248">
    <graphics y="66.27211358430789" x="-96.2113768016936" z="0.0"/>
  </node>
  <node id="21575" label="ENSMUSG00000051457" cy:nodeId="1760">
    <graphics y="199.0427115344138" x="-17.38681876394095" z="0.0"/>
  </node>
  <node id="21576" label="ENSMUSG00000039831" cy:nodeId="737">
    <graphics y="174.08648853532853" x="452.6554226289545" z="0.0"/>
  </node>
  <node id="21577" label="ENSMUSG00000097632" cy:nodeId="229">
    <graphics y="178.79547165645272" x="121.45964067214385" z="0.0"/>
  </node>
  <node id="21578" label="ENSMUSG00000050335" cy:nodeId="1765">
    <graphics y="180.44346841629385" x="79.67941858006134" z="0.0"/>
  </node>
  <node id="21579" label="ENSMUSG00000038486" cy:nodeId="1257">
    <graphics y="478.44953926274536" x="576.2248246042351" z="0.0"/>
  </node>
  <node id="21580" label="ENSMUSG00000038903" cy:nodeId="746">
    <graphics y="184.7304467421515" x="429.94334711135957" z="0.0"/>
  </node>
  <node id="21581" label="ENSMUSG00000049288" cy:nodeId="1771">
    <graphics y="261.03762230007067" x="242.30017464005593" z="0.0"/>
  </node>
  <node id="21582" label="ENSMUSG00000038349" cy:nodeId="750">
    <graphics y="468.81512219331523" x="307.56914065761816" z="0.0"/>
  </node>
  <node id="21583" label="ENSMUSG00000036887" cy:nodeId="1264">
    <graphics y="-17.50906609117851" x="477.84570045468035" z="0.0"/>
  </node>
  <node id="21584" label="ENSMUSG00000036777" cy:nodeId="1265">
    <graphics y="419.9718025037758" x="-88.40512536949575" z="0.0"/>
  </node>
  <node id="21585" label="ENSMUSG00000036745" cy:nodeId="1266">
    <graphics y="479.9478641037364" x="266.09872191609793" z="0.0"/>
  </node>
  <node id="21586" label="ENSMUSG00000036036" cy:nodeId="1267">
    <graphics y="292.76149777906113" x="263.6015463689666" z="0.0"/>
  </node>
  <node id="21587" label="ENSMUSG00000097284" cy:nodeId="243">
    <graphics y="-69.230628114311" x="473.2584734227288" z="0.0"/>
  </node>
  <node id="21588" label="ENSMUSG00000099552" cy:nodeId="244">
    <graphics y="79.48814010439595" x="395.4766713450156" z="0.0"/>
  </node>
  <node id="21589" label="ENSMUSG00000097932" cy:nodeId="245">
    <graphics y="115.24646303278075" x="583.2324723193138" z="0.0"/>
  </node>
  <node id="21590" label="ENSMUSG00000035164" cy:nodeId="1269">
    <graphics y="465.323237102412" x="572.0345777869455" z="0.0"/>
  </node>
  <node id="21591" label="ENSMUSG00000037509" cy:nodeId="764">
    <graphics y="-108.1477277980643" x="370.95338202106916" z="0.0"/>
  </node>
  <node id="21592" label="ENSMUSG00000097561" cy:nodeId="253">
    <graphics y="229.03634797688233" x="387.8624198282782" z="0.0"/>
  </node>
  <node id="21593" label="ENSMUSG00000047109" cy:nodeId="1789">
    <graphics y="25.200615259206174" x="308.3238091578246" z="0.0"/>
  </node>
  <node id="21594" label="ENSMUSG00000103043" cy:nodeId="255">
    <graphics y="-111.29627368161314" x="267.57890699720406" z="0.0"/>
  </node>
  <node id="21595" label="ENSMUSG00000085183" cy:nodeId="256">
    <graphics y="194.95203517328866" x="338.5310218731955" z="0.0"/>
  </node>
  <node id="21596" label="ENSMUSG00000030329" cy:nodeId="1281">
    <graphics y="551.2334510056126" x="68.39251984924502" z="0.0"/>
  </node>
  <node id="21597" label="ENSMUSG00000046223" cy:nodeId="1795">
    <graphics y="547.1083563294843" x="287.4403071933748" z="0.0"/>
  </node>
  <node id="21598" label="ENSMUSG00000036944" cy:nodeId="773">
    <graphics y="492.23300252125546" x="160.8827040915325" z="0.0"/>
  </node>
  <node id="21599" label="ENSMUSG00000029154" cy:nodeId="1287">
    <graphics y="-145.17662594697768" x="293.206038700021" z="0.0"/>
  </node>
  <node id="21600" label="ENSMUSG00000028403" cy:nodeId="1291">
    <graphics y="335.68096448513984" x="84.19209968305614" z="0.0"/>
  </node>
  <node id="21601" label="ENSMUSG00000044005" cy:nodeId="1805">
    <graphics y="469.3658270172997" x="395.6598645522455" z="0.0"/>
  </node>
  <node id="21602" label="ENSMUSG00000027931" cy:nodeId="1295">
    <graphics y="451.5555868320685" x="-3.072009852199642" z="0.0"/>
  </node>
  <node id="21603" label="ENSMUSG00000043154" cy:nodeId="1807">
    <graphics y="-9.310440424560369" x="498.0570839015347" z="0.0"/>
  </node>
  <node id="21604" label="ENSMUSG00000035683" cy:nodeId="787">
    <graphics y="278.12789061736083" x="62.700838431964655" z="0.0"/>
  </node>
  <node id="21605" label="ENSMUSG00000042489" cy:nodeId="1812">
    <graphics y="281.70690904682795" x="345.6070709113517" z="0.0"/>
  </node>
  <node id="21606" label="ENSMUSG00000042462" cy:nodeId="1813">
    <graphics y="447.3367122379873" x="67.15847706480429" z="0.0"/>
  </node>
  <node id="21607" label="ENSMUSG00000026700" cy:nodeId="1301">
    <graphics y="219.72914037976136" x="-168.37384521408313" z="0.0"/>
  </node>
  <node id="21608" label="ENSMUSG00000026646" cy:nodeId="1303">
    <graphics y="326.11152271990693" x="480.5849455723565" z="0.0"/>
  </node>
  <node id="21609" label="ENSMUSG00000034656" cy:nodeId="796">
    <graphics y="212.37600177129718" x="-127.9218751867759" z="0.0"/>
  </node>
  <node id="21610" label="ENSMUSG00000034118" cy:nodeId="801">
    <graphics y="544.3953888877912" x="423.0159639753605" z="0.0"/>
  </node>
  <node id="21611" label="ENSMUSG00000024613" cy:nodeId="1315">
    <graphics y="187.81401723067893" x="136.97885846804235" z="0.0"/>
  </node>
  <node id="21612" label="ENSMUSG00000033825" cy:nodeId="804">
    <graphics y="303.15096441444405" x="464.85586087629645" z="0.0"/>
  </node>
  <node id="21613" label="ENSMUSG00000040462" cy:nodeId="1828">
    <graphics y="603.3563324746842" x="376.11956694249795" z="0.0"/>
  </node>
  <node id="21614" label="ENSMUSG00000040339" cy:nodeId="1829">
    <graphics y="14.13152630797201" x="163.13305109656827" z="0.0"/>
  </node>
  <node id="21615" label="ENSMUSG00000040276" cy:nodeId="1830">
    <graphics y="316.59793139506746" x="533.2540066873279" z="0.0"/>
  </node>
  <node id="21616" label="ENSMUSG00000021396" cy:nodeId="1323">
    <graphics y="398.36767290339014" x="213.74524727630038" z="0.0"/>
  </node>
  <node id="21617" label="ENSMUSG00000033032" cy:nodeId="813">
    <graphics y="157.2557541443103" x="188.10670259604203" z="0.0"/>
  </node>
  <node id="21618" label="ENSMUSG00000039384" cy:nodeId="1840">
    <graphics y="-69.98508135550287" x="507.96099445537004" z="0.0"/>
  </node>
  <node id="21619" label="ENSMUSG00000039234" cy:nodeId="1842">
    <graphics y="598.9176105124668" x="47.50963303092962" z="0.0"/>
  </node>
  <node id="21620" label="ENSMUSG00000032532" cy:nodeId="819">
    <graphics y="-187.85109121777737" x="277.31468303985895" z="0.0"/>
  </node>
  <node id="21621" label="ENSMUSG00000016200" cy:nodeId="1333">
    <graphics y="172.60201406877866" x="-53.26300998303665" z="0.0"/>
  </node>
  <node id="21622" label="ENSMUSG00000039145" cy:nodeId="1846">
    <graphics y="591.0076097413266" x="102.95159101107208" z="0.0"/>
  </node>
  <node id="21623" label="ENSMUSG00000013698" cy:nodeId="1336">
    <graphics y="72.1999734716625" x="505.9112246716879" z="0.0"/>
  </node>
  <node id="21624" label="ENSMUSG00000039115" cy:nodeId="1848">
    <graphics y="-10.698060662246732" x="139.05766879616965" z="0.0"/>
  </node>
  <node id="21625" label="ENSMUSG00000013523" cy:nodeId="1337">
    <graphics y="242.37483002644916" x="64.6024239216928" z="0.0"/>
  </node>
  <node id="21626" label="ENSMUSG00000009108" cy:nodeId="1340">
    <graphics y="-21.59542609605728" x="439.2561127661435" z="0.0"/>
  </node>
  <node id="21627" label="ENSMUSG00000038578" cy:nodeId="1853">
    <graphics y="336.26860147709914" x="357.93315927141657" z="0.0"/>
  </node>
  <node id="21628" label="ENSMUSG00000032232" cy:nodeId="830">
    <graphics y="108.97895906571807" x="464.2005870240199" z="0.0"/>
  </node>
  <node id="21629" label="ENSMUSG00000032092" cy:nodeId="833">
    <graphics y="-59.46126209531661" x="223.50790923013244" z="0.0"/>
  </node>
  <node id="21630" label="ENSMUSG00000004709" cy:nodeId="1345">
    <graphics y="527.4708077978332" x="311.4875455683886" z="0.0"/>
  </node>
  <node id="21631" label="ENSMUSG00000038319" cy:nodeId="1857">
    <graphics y="560.2794520105033" x="74.96909606311897" z="0.0"/>
  </node>
  <node id="21632" label="ENSMUSG00000032035" cy:nodeId="834">
    <graphics y="235.7299142444535" x="265.1704087576626" z="0.0"/>
  </node>
  <node id="21633" label="ENSMUSG00000038241" cy:nodeId="1858">
    <graphics y="309.43594673071584" x="189.30745099621862" z="0.0"/>
  </node>
  <node id="21634" label="ENSMUSG00000003469" cy:nodeId="1347">
    <graphics y="621.4671402230554" x="311.0960744887027" z="0.0"/>
  </node>
  <node id="21635" label="ENSMUSG00000038068" cy:nodeId="1860">
    <graphics y="-11.560051200544336" x="490.02138363757757" z="0.0"/>
  </node>
  <node id="21636" label="ENSMUSG00000031981" cy:nodeId="838">
    <graphics y="229.67380240154182" x="-31.011250965800286" z="0.0"/>
  </node>
  <node id="21637" label="ENSMUSG00000038005" cy:nodeId="1862">
    <graphics y="-44.476691466411125" x="459.77474456901354" z="0.0"/>
  </node>
  <node id="21638" label="ENSMUSG00000001761" cy:nodeId="1350">
    <graphics y="46.62609858483043" x="155.13261448660913" z="0.0"/>
  </node>
  <node id="21639" label="ENSMUSG00000037820" cy:nodeId="1864">
    <graphics y="208.6546787927254" x="122.29236063679599" z="0.0"/>
  </node>
  <node id="21640" label="ENSMUSG00000000555" cy:nodeId="1352">
    <graphics y="191.02570116448027" x="68.18013585790433" z="0.0"/>
  </node>
  <node id="21641" label="ENSMUSG00000037643" cy:nodeId="1865">
    <graphics y="417.37528328554254" x="345.36106713419275" z="0.0"/>
  </node>
  <node id="21642" label="ENSMUSG00000031844" cy:nodeId="842">
    <graphics y="491.37106637989314" x="534.6966382046244" z="0.0"/>
  </node>
  <node id="21643" label="ENSMUSG00000015468" cy:nodeId="1356">
    <graphics y="-59.83268678539538" x="212.81091675790418" z="0.0"/>
  </node>
  <node id="21644" label="ENSMUSG00000074652" cy:nodeId="1358">
    <graphics y="190.61842226091517" x="638.3192634552888" z="0.0"/>
  </node>
  <node id="21645" label="ENSMUSG00000070867" cy:nodeId="1359">
    <graphics y="361.069190730889" x="449.88069485902986" z="0.0"/>
  </node>
  <node id="21646" label="ENSMUSG00000068196" cy:nodeId="1361">
    <graphics y="95.95952414249655" x="518.5646252740261" z="0.0"/>
  </node>
  <node id="21647" label="ENSMUSG00000037159" cy:nodeId="1873">
    <graphics y="177.58817845716126" x="158.60320735037615" z="0.0"/>
  </node>
  <node id="21648" label="ENSMUSG00000036863" cy:nodeId="1876">
    <graphics y="369.3366471728391" x="354.6748558324769" z="0.0"/>
  </node>
  <node id="21649" label="ENSMUSG00000048349" cy:nodeId="1368">
    <graphics y="-15.951558825991626" x="278.12617954924133" z="0.0"/>
  </node>
  <node id="21650" label="ENSMUSG00000036256" cy:nodeId="1880">
    <graphics y="192.95308359536375" x="-15.109826706637847" z="0.0"/>
  </node>
  <node id="21651" label="ENSMUSG00000045518" cy:nodeId="1369">
    <graphics y="488.7855535089784" x="137.78907376856574" z="0.0"/>
  </node>
  <node id="21652" label="ENSMUSG00000030772" cy:nodeId="861">
    <graphics y="620.4301299021979" x="419.9863677433547" z="0.0"/>
  </node>
  <node id="21653" label="ENSMUSG00000032773" cy:nodeId="1374">
    <graphics y="313.3068864921954" x="587.6745701943248" z="0.0"/>
  </node>
  <node id="21654" label="ENSMUSG00000035273" cy:nodeId="1888">
    <graphics y="-136.0570589116228" x="215.6736424834736" z="0.0"/>
  </node>
  <node id="21655" label="ENSMUSG00000030353" cy:nodeId="865">
    <graphics y="201.86722713867655" x="280.14197603574684" z="0.0"/>
  </node>
  <node id="21656" label="ENSMUSG00000030287" cy:nodeId="867">
    <graphics y="395.01326327834477" x="470.2048470491093" z="0.0"/>
  </node>
  <node id="21657" label="ENSMUSG00000028986" cy:nodeId="1379">
    <graphics y="-154.23112441951378" x="303.8050234376026" z="0.0"/>
  </node>
  <node id="21658" label="ENSMUSG00000030137" cy:nodeId="868">
    <graphics y="235.51374378446863" x="-122.01130746166405" z="0.0"/>
  </node>
  <node id="21659" label="ENSMUSG00000034265" cy:nodeId="1895">
    <graphics y="379.043116315572" x="-76.53812132347826" z="0.0"/>
  </node>
  <node id="21660" label="ENSMUSG00000024533" cy:nodeId="1384">
    <graphics y="484.3030681992997" x="201.36362095410803" z="0.0"/>
  </node>
  <node id="21661" label="ENSMUSG00000024366" cy:nodeId="1385">
    <graphics y="474.6500208140751" x="188.66406214164107" z="0.0"/>
  </node>
  <node id="21662" label="ENSMUSG00000022489" cy:nodeId="1387">
    <graphics y="88.07726724263566" x="515.132845613979" z="0.0"/>
  </node>
  <node id="21663" label="ENSMUSG00000021061" cy:nodeId="1390">
    <graphics y="69.63079644176699" x="432.15732444249915" z="0.0"/>
  </node>
  <node id="21664" label="ENSMUSG00000010021" cy:nodeId="1393">
    <graphics y="590.440696920901" x="67.63076060152741" z="0.0"/>
  </node>
  <node id="21665" label="ENSMUSG00000001985" cy:nodeId="1395">
    <graphics y="330.432247224595" x="107.72211898213496" z="0.0"/>
  </node>
  <node id="21666" label="ENSMUSG00000032902" cy:nodeId="1908">
    <graphics y="596.3320121397595" x="426.7524651069109" z="0.0"/>
  </node>
  <node id="21667" label="ENSMUSG00000098557" cy:nodeId="1399">
    <graphics y="263.1646766090552" x="-20.166049721624972" z="0.0"/>
  </node>
  <node id="21668" label="ENSMUSG00000092486" cy:nodeId="1401">
    <graphics y="293.0563442210626" x="124.72888369879064" z="0.0"/>
  </node>
  <node id="21669" label="ENSMUSG00000089789" cy:nodeId="1403">
    <graphics y="175.1525694481013" x="-92.50582442946514" z="0.0"/>
  </node>
  <node id="21670" label="ENSMUSG00000032531" cy:nodeId="1915">
    <graphics y="253.06929712449846" x="464.6020851340498" z="0.0"/>
  </node>
  <node id="21671" label="ENSMUSG00000079685" cy:nodeId="1404">
    <graphics y="390.76494694134243" x="368.5754418502142" z="0.0"/>
  </node>
  <node id="21672" label="ENSMUSG00000079038" cy:nodeId="1406">
    <graphics y="129.72866740347922" x="590.220007748436" z="0.0"/>
  </node>
  <node id="21673" label="ENSMUSG00000032350" cy:nodeId="1918">
    <graphics y="188.23627425337654" x="-0.45408315553758527" z="0.0"/>
  </node>
  <node id="21674" label="ENSMUSG00000078949" cy:nodeId="1407">
    <graphics y="329.16790559326506" x="323.30256151222704" z="0.0"/>
  </node>
  <node id="21675" label="ENSMUSG00000078349" cy:nodeId="1408">
    <graphics y="249.9478279280599" x="376.768054154105" z="0.0"/>
  </node>
  <node id="21676" label="ENSMUSG00000028555" cy:nodeId="898">
    <graphics y="169.4421059101543" x="482.20810290908213" z="0.0"/>
  </node>
  <node id="21677" label="ENSMUSG00000028532" cy:nodeId="900">
    <graphics y="212.84399466486119" x="579.8839309523142" z="0.0"/>
  </node>
  <node id="21678" label="ENSMUSG00000028415" cy:nodeId="904">
    <graphics y="145.65850442608394" x="-117.31660703671182" z="0.0"/>
  </node>
  <node id="21679" label="ENSMUSG00000031668" cy:nodeId="1928">
    <graphics y="270.3348783258743" x="392.0632544610774" z="0.0"/>
  </node>
  <node id="21680" label="ENSMUSG00000068735" cy:nodeId="1416">
    <graphics y="111.68880172289182" x="-65.5087064475363" z="0.0"/>
  </node>
  <node id="21681" label="ENSMUSG00000031629" cy:nodeId="1929">
    <graphics y="-1.8625267771138283" x="209.16895184281185" z="0.0"/>
  </node>
  <node id="21682" label="ENSMUSG00000028356" cy:nodeId="907">
    <graphics y="523.0249441392186" x="83.38738624583004" z="0.0"/>
  </node>
  <node id="21683" label="ENSMUSG00000064267" cy:nodeId="1419">
    <graphics y="514.5472168105084" x="512.4434812604552" z="0.0"/>
  </node>
  <node id="21684" label="ENSMUSG00000060671" cy:nodeId="1421">
    <graphics y="337.3222499759953" x="-100.61102171059264" z="0.0"/>
  </node>
  <node id="21685" label="ENSMUSG00000028039" cy:nodeId="915">
    <graphics y="241.22592450716036" x="623.0218855680583" z="0.0"/>
  </node>
  <node id="21686" label="ENSMUSG00000030199" cy:nodeId="1942">
    <graphics y="583.8631231047855" x="295.51935339604677" z="0.0"/>
  </node>
  <node id="21687" label="ENSMUSG00000030107" cy:nodeId="1943">
    <graphics y="70.00207887375885" x="310.68595718890816" z="0.0"/>
  </node>
  <node id="21688" label="ENSMUSG00000027797" cy:nodeId="920">
    <graphics y="302.09375508724787" x="304.4765243614379" z="0.0"/>
  </node>
  <node id="21689" label="ENSMUSG00000029910" cy:nodeId="1945">
    <graphics y="-114.60489882189313" x="244.20203613392601" z="0.0"/>
  </node>
  <node id="21690" label="ENSMUSG00000047878" cy:nodeId="1434">
    <graphics y="545.3439198183743" x="352.813118357743" z="0.0"/>
  </node>
  <node id="21691" label="ENSMUSG00000029875" cy:nodeId="1946">
    <graphics y="109.40960501999709" x="543.4877765985907" z="0.0"/>
  </node>
  <node id="21692" label="ENSMUSG00000027635" cy:nodeId="924">
    <graphics y="212.93695567768978" x="102.85158221531566" z="0.0"/>
  </node>
  <node id="21693" label="ENSMUSG00000045751" cy:nodeId="1436">
    <graphics y="353.72391858468967" x="333.75732115383664" z="0.0"/>
  </node>
  <node id="21694" label="ENSMUSG00000045007" cy:nodeId="1438">
    <graphics y="282.60444899841116" x="282.84261668845465" z="0.0"/>
  </node>
  <node id="21695" label="ENSMUSG00000029408" cy:nodeId="1955">
    <graphics y="600.2821181564093" x="447.4524369165607" z="0.0"/>
  </node>
  <node id="21696" label="ENSMUSG00000029343" cy:nodeId="1956">
    <graphics y="246.55188450525395" x="-142.1372147683321" z="0.0"/>
  </node>
  <node id="21697" label="ENSMUSG00000029312" cy:nodeId="1957">
    <graphics y="537.0634586716103" x="401.1159772338513" z="0.0"/>
  </node>
  <node id="21698" label="ENSMUSG00000039395" cy:nodeId="1449">
    <graphics y="-78.63038458746541" x="488.78744592922095" z="0.0"/>
  </node>
  <node id="21699" label="ENSMUSG00000028909" cy:nodeId="1961">
    <graphics y="237.06496698061824" x="628.2216290278014" z="0.0"/>
  </node>
  <node id="21700" label="ENSMUSG00000039323" cy:nodeId="1450">
    <graphics y="430.0346900890454" x="174.71951736955359" z="0.0"/>
  </node>
  <node id="21701" label="ENSMUSG00000026483" cy:nodeId="940">
    <graphics y="179.86056926932338" x="-2.318662554103213" z="0.0"/>
  </node>
  <node id="21702" label="ENSMUSG00000028699" cy:nodeId="1966">
    <graphics y="36.86573559822514" x="431.733110735301" z="0.0"/>
  </node>
  <node id="21703" label="ENSMUSG00000036223" cy:nodeId="1455">
    <graphics y="67.15304107276631" x="-72.81964749945529" z="0.0"/>
  </node>
  <node id="21704" label="ENSMUSG00000028634" cy:nodeId="1969">
    <graphics y="-33.102179373288024" x="-35.284635531049986" z="0.0"/>
  </node>
  <node id="21705" label="ENSMUSG00000035849" cy:nodeId="1458">
    <graphics y="217.779483544108" x="85.61754773008371" z="0.0"/>
  </node>
  <node id="21706" label="ENSMUSG00000026303" cy:nodeId="947">
    <graphics y="436.63509346928265" x="381.6113487235173" z="0.0"/>
  </node>
  <node id="21707" label="ENSMUSG00000028602" cy:nodeId="1972">
    <graphics y="428.498440470426" x="593.5996954482239" z="0.0"/>
  </node>
  <node id="21708" label="ENSMUSG00000034768" cy:nodeId="1463">
    <graphics y="404.7389891934628" x="526.8889438723415" z="0.0"/>
  </node>
  <node id="21709" label="ENSMUSG00000033970" cy:nodeId="1465">
    <graphics y="273.039551496271" x="14.686443621240102" z="0.0"/>
  </node>
  <node id="21710" label="ENSMUSG00000028312" cy:nodeId="1977">
    <graphics y="325.0635760269555" x="-106.41032186977213" z="0.0"/>
  </node>
  <node id="21711" label="ENSMUSG00000028282" cy:nodeId="1978">
    <graphics y="109.99079405468399" x="219.7414221231857" z="0.0"/>
  </node>
  <node id="21712" label="ENSMUSG00000025608" cy:nodeId="957">
    <graphics y="323.51636520043144" x="376.88077392972286" z="0.0"/>
  </node>
  <node id="21713" label="ENSMUSG00000027834" cy:nodeId="1982">
    <graphics y="451.2539147330241" x="325.81251102227094" z="0.0"/>
  </node>
  <node id="21714" label="ENSMUSG00000031730" cy:nodeId="1474">
    <graphics y="-29.51975425205356" x="325.87969921707185" z="0.0"/>
  </node>
  <node id="21715" label="ENSMUSG00000027611" cy:nodeId="1986">
    <graphics y="330.8504971467502" x="224.8499165875076" z="0.0"/>
  </node>
  <node id="21716" label="ENSMUSG00000027533" cy:nodeId="1987">
    <graphics y="12.078271016720144" x="152.31911636805515" z="0.0"/>
  </node>
  <node id="21717" label="ENSMUSG00000030659" cy:nodeId="1479">
    <graphics y="167.8067432729427" x="-153.47437955032427" z="0.0"/>
  </node>
  <node id="21718" label="ENSMUSG00000027230" cy:nodeId="1995">
    <graphics y="525.6958637330384" x="368.1369663944848" z="0.0"/>
  </node>
  <node id="21719" label="ENSMUSG00000027075" cy:nodeId="1996">
    <graphics y="502.15980658141757" x="385.9596962416325" z="0.0"/>
  </node>
  <node id="21720" label="ENSMUSG00000025075" cy:nodeId="972">
    <graphics y="504.21510760967215" x="-32.53452411989325" z="0.0"/>
  </node>
  <node id="21721" label="ENSMUSG00000028949" cy:nodeId="1484">
    <graphics y="388.37199878653325" x="83.3334075326467" z="0.0"/>
  </node>
  <node id="21722" label="ENSMUSG00000028825" cy:nodeId="1486">
    <graphics y="118.42470397559134" x="585.1690302744619" z="0.0"/>
  </node>
  <node id="21723" label="ENSMUSG00000027006" cy:nodeId="1998">
    <graphics y="119.301565351629" x="382.152106245645" z="0.0"/>
  </node>
  <node id="21724" label="ENSMUSG00000028763" cy:nodeId="1487">
    <graphics y="530.8836096302919" x="6.056435291548468" z="0.0"/>
  </node>
  <node id="21725" label="ENSMUSG00000024912" cy:nodeId="977">
    <graphics y="261.47521349414444" x="242.94683704394853" z="0.0"/>
  </node>
  <node id="21726" label="ENSMUSG00000027661" cy:nodeId="1489">
    <graphics y="221.413653677193" x="-132.93574230959211" z="0.0"/>
  </node>
  <node id="21727" label="ENSMUSG00000027435" cy:nodeId="1492">
    <graphics y="361.773735040034" x="523.0787948581419" z="0.0"/>
  </node>
  <node id="21728" label="ENSMUSG00000027420" cy:nodeId="1493">
    <graphics y="380.97915904298054" x="-106.69977066303798" z="0.0"/>
  </node>
  <node id="21729" label="ENSMUSG00000026683" cy:nodeId="2005">
    <graphics y="319.0484977177109" x="-119.91654309782302" z="0.0"/>
  </node>
  <node id="21730" label="ENSMUSG00000024512" cy:nodeId="982">
    <graphics y="-64.66866805688997" x="81.05627719796132" z="0.0"/>
  </node>
  <node id="21731" label="ENSMUSG00000026546" cy:nodeId="2007">
    <graphics y="16.711039906316387" x="97.4284539373414" z="0.0"/>
  </node>
  <node id="21732" label="ENSMUSG00000026504" cy:nodeId="2009">
    <graphics y="-28.162602103137118" x="284.6288102662736" z="0.0"/>
  </node>
  <node id="21733" label="ENSMUSG00000026669" cy:nodeId="1498">
    <graphics y="483.71185842709866" x="232.12044075629908" z="0.0"/>
  </node>
  <node id="21734" label="ENSMUSG00000026380" cy:nodeId="1501">
    <graphics y="605.9268550735301" x="453.8300070749621" z="0.0"/>
  </node>
  <node id="21735" label="ENSMUSG00000026355" cy:nodeId="1502">
    <graphics y="459.8816048882077" x="242.66539954342906" z="0.0"/>
  </node>
  <node id="21736" label="ENSMUSG00000025742" cy:nodeId="1504">
    <graphics y="-126.06586610726434" x="172.6115292438139" z="0.0"/>
  </node>
  <node id="21737" label="ENSMUSG00000095567" cy:nodeId="481">
    <graphics y="408.345750465808" x="537.0296024091206" z="0.0"/>
  </node>
  <node id="21738" label="ENSMUSG00000025351" cy:nodeId="2019">
    <graphics y="233.68041508074884" x="206.05657078463076" z="0.0"/>
  </node>
  <node id="21739" label="ENSMUSG00000024423" cy:nodeId="1510">
    <graphics y="251.70722691077577" x="524.8309780391679" z="0.0"/>
  </node>
  <node id="21740" label="ENSMUSG00000025001" cy:nodeId="2022">
    <graphics y="-72.52327041036583" x="413.9721254572825" z="0.0"/>
  </node>
  <node id="21741" label="ENSMUSG00000023886" cy:nodeId="999">
    <graphics y="527.5382864435048" x="459.8073840556002" z="0.0"/>
  </node>
  <node id="21742" label="ENSMUSG00000024989" cy:nodeId="2023">
    <graphics y="571.2585094086985" x="417.7636027998104" z="0.0"/>
  </node>
  <node id="21743" label="ENSMUSG00000024891" cy:nodeId="2025">
    <graphics y="354.7091665125245" x="-80.37393154780125" z="0.0"/>
  </node>
  <node id="21744" label="ENSMUSG00000023247" cy:nodeId="1001">
    <graphics y="478.3913522361429" x="410.46890228532277" z="0.0"/>
  </node>
  <node id="21745" label="ENSMUSG00000081769" cy:nodeId="489">
    <graphics y="210.71481410293384" x="141.30638061492323" z="0.0"/>
  </node>
  <node id="21746" label="ENSMUSG00000022881" cy:nodeId="1514">
    <graphics y="639.0566215649259" x="230.48137885944536" z="0.0"/>
  </node>
  <node id="21747" label="ENSMUSG00000022840" cy:nodeId="1515">
    <graphics y="469.2934102363322" x="206.6945280468771" z="0.0"/>
  </node>
  <node id="21748" label="ENSMUSG00000023066" cy:nodeId="1003">
    <graphics y="23.142140051609054" x="-39.14006184527712" z="0.0"/>
  </node>
  <node id="21749" label="ENSMUSG00000024777" cy:nodeId="2028">
    <graphics y="524.6865719511497" x="-25.148675072061906" z="0.0"/>
  </node>
  <node id="21750" label="ENSMUSG00000022021" cy:nodeId="1517">
    <graphics y="524.7010194104627" x="68.58391963305864" z="0.0"/>
  </node>
</graph>
