# Supplementary material for: Regulatory network analysis of Paneth cell and goblet cell enriched gut organoids using transcriptomics approaches
Source: Royal Society of Chemistry journal article supplement (doi:10.1039/c9mo00130a), 2019-12-10
Supplement: c9mo00130a2.cys [file c9mo00130a2.cys › CytoscapeSession-2019_09_26-21_57/views/21391-44651-1%3A+Cluster+2+%28Score%3A+7.429%29.xgmml]

<?xml version="1.0" encoding="UTF-8" standalone="yes"?>
<graph id="44651" label="44651" cy:view="1" cy:networkId="21391" cy:visualStyle="default" cy:rendererId="org.cytoscape.ding" cy:documentVersion="3.0" xmlns:dc="http://purl.org/dc/elements/1.1/" xmlns:xlink="http://www.w3.org/1999/xlink" xmlns:rdf="http://www.w3.org/1999/02/22-rdf-syntax-ns#" xmlns:cy="http://www.cytoscape.org" xmlns="http://www.cs.rpi.edu/XGMML">
  <graphics>
    <att name="NETWORK_CENTER_Z_LOCATION" value="0.0" type="string" cy:type="String"/>
    <att name="NETWORK_WIDTH" value="658.0" type="string" cy:type="String"/>
    <att name="NETWORK_HEIGHT" value="510.0" type="string" cy:type="String"/>
    <att name="NETWORK_DEPTH" value="0.0" type="string" cy:type="String"/>
    <att name="NETWORK_CENTER_X_LOCATION" value="163.06188583374023" type="string" cy:type="String"/>
    <att name="NETWORK_TITLE" value="" type="string" cy:type="String"/>
    <att name="NETWORK_SCALE_FACTOR" value="1.631302402508414" type="string" cy:type="String"/>
    <att name="NETWORK_EDGE_SELECTION" value="true" type="string" cy:type="String"/>
    <att name="NETWORK_ANNOTATION_SELECTION" value="false" type="string" cy:type="String"/>
    <att name="NETWORK_CENTER_Y_LOCATION" value="114.78876686096191" type="string" cy:type="String"/>
    <att name="NETWORK_NODE_SELECTION" value="true" type="string" cy:type="String"/>
  </graphics>
  <node id="44666" label="ENSMUSG00000054893" cy:nodeId="1743">
    <graphics y="67.92257690429688" x="287.37799072265625" z="0.0">
      <att name="lockedVisualProperties" type="list" cy:type="List">
        <att name="NODE_LABEL_COLOR" value="#FFFFFF" type="string" cy:type="String"/>
      </att>
    </graphics>
  </node>
  <node id="44667" label="ENSMUSG00000069255" cy:nodeId="1360">
    <graphics y="-0.9699020385742188" x="115.09083557128906" z="0.0">
      <att name="lockedVisualProperties" type="list" cy:type="List">
        <att name="NODE_LABEL_COLOR" value="#FFFFFF" type="string" cy:type="String"/>
      </att>
    </graphics>
  </node>
  <node id="44668" label="ENSMUSG00000027641" cy:nodeId="2166">
    <graphics y="54.21336364746094" x="48.513023376464844" z="0.0">
      <att name="lockedVisualProperties" type="list" cy:type="List">
        <att name="NODE_LABEL_COLOR" value="#FFFFFF" type="string" cy:type="String"/>
      </att>
    </graphics>
  </node>
  <node id="44669" label="ENSMUSG00000024232" cy:nodeId="2038">
    <graphics y="250.479248046875" x="171.07452392578125" z="0.0">
      <att name="lockedVisualProperties" type="list" cy:type="List">
        <att name="NODE_LABEL_COLOR" value="#FFFFFF" type="string" cy:type="String"/>
      </att>
    </graphics>
  </node>
  <node id="44670" label="ENSMUSG00000021453" cy:nodeId="2074">
    <graphics y="98.79721069335938" x="25.879722595214844" z="0.0">
      <att name="lockedVisualProperties" type="list" cy:type="List">
        <att name="NODE_LABEL_COLOR" value="#FFFFFF" type="string" cy:type="String"/>
      </att>
    </graphics>
  </node>
  <node id="44671" label="ENSMUSG00000025810" cy:nodeId="1307">
    <graphics y="226.6881103515625" x="217.48631286621094" z="0.0">
      <att name="lockedVisualProperties" type="list" cy:type="List">
        <att name="NODE_LABEL_COLOR" value="#FFFFFF" type="string" cy:type="String"/>
      </att>
    </graphics>
  </node>
  <node id="44672" label="ENSMUSG00000041075" cy:nodeId="1819">
    <graphics y="-20.75664520263672" x="201.75193786621094" z="0.0">
      <att name="lockedVisualProperties" type="list" cy:type="List">
        <att name="NODE_LABEL_COLOR" value="#FFFFFF" type="string" cy:type="String"/>
      </att>
    </graphics>
  </node>
  <node id="44673" label="ENSMUSG00000028212" cy:nodeId="1979">
    <graphics y="111.46127319335938" x="300.2440490722656" z="0.0">
      <att name="lockedVisualProperties" type="list" cy:type="List">
        <att name="NODE_LABEL_COLOR" value="#FFFFFF" type="string" cy:type="String"/>
      </att>
    </graphics>
  </node>
  <node id="44674" label="ENSMUSG00000003032" cy:nodeId="2140">
    <graphics y="186.17892456054688" x="33.765167236328125" z="0.0">
      <att name="lockedVisualProperties" type="list" cy:type="List">
        <att name="NODE_LABEL_COLOR" value="#FFFFFF" type="string" cy:type="String"/>
      </att>
    </graphics>
  </node>
  <node id="44653" label="ENSMUSG00000025912" cy:nodeId="2014">
    <graphics y="42.50838851928711" x="217.25296020507812" z="0.0">
      <att name="lockedVisualProperties" type="list" cy:type="List">
        <att name="NODE_LABEL_COLOR" value="#FFFFFF" type="string" cy:type="String"/>
      </att>
    </graphics>
  </node>
  <node id="44654" label="ENSMUSG00000070348" cy:nodeId="2174">
    <graphics y="150.62156677246094" x="276.5569152832031" z="0.0">
      <att name="lockedVisualProperties" type="list" cy:type="List">
        <att name="NODE_LABEL_COLOR" value="#FFFFFF" type="string" cy:type="String"/>
      </att>
    </graphics>
  </node>
  <node id="44655" label="ENSMUSG00000052085" cy:nodeId="1759">
    <graphics y="230.8880615234375" x="75.56916046142578" z="0.0">
      <att name="lockedVisualProperties" type="list" cy:type="List">
        <att name="NODE_LABEL_COLOR" value="#FFFFFF" type="string" cy:type="String"/>
      </att>
    </graphics>
  </node>
  <node id="44656" label="ENSMUSG00000051335" cy:nodeId="1761">
    <graphics y="228.4768829345703" x="127.50885009765625" z="0.0">
      <att name="lockedVisualProperties" type="list" cy:type="List">
        <att name="NODE_LABEL_COLOR" value="#FFFFFF" type="string" cy:type="String"/>
      </att>
    </graphics>
  </node>
  <node id="44657" label="ENSMUSG00000074063" cy:nodeId="1699">
    <graphics y="-20.901714324951172" x="155.79188537597656" z="0.0">
      <att name="lockedVisualProperties" type="list" cy:type="List">
        <att name="NODE_LABEL_COLOR" value="#FFFFFF" type="string" cy:type="String"/>
      </att>
    </graphics>
  </node>
  <node id="44658" label="ENSMUSG00000031987" cy:nodeId="1925">
    <graphics y="0.5725822448730469" x="55.39710235595703" z="0.0">
      <att name="lockedVisualProperties" type="list" cy:type="List">
        <att name="NODE_LABEL_COLOR" value="#FFFFFF" type="string" cy:type="String"/>
      </att>
    </graphics>
  </node>
  <node id="44659" label="ENSMUSG00000024431" cy:nodeId="2182">
    <graphics y="95.71951293945312" x="141.86062622070312" z="0.0">
      <att name="lockedVisualProperties" type="list" cy:type="List">
        <att name="NODE_LABEL_COLOR" value="#FFFFFF" type="string" cy:type="String"/>
      </att>
    </graphics>
  </node>
  <node id="44660" label="ENSMUSG00000022479" cy:nodeId="2185">
    <graphics y="131.3993377685547" x="145.76034545898438" z="0.0">
      <att name="lockedVisualProperties" type="list" cy:type="List">
        <att name="NODE_LABEL_COLOR" value="#FFFFFF" type="string" cy:type="String"/>
      </att>
    </graphics>
  </node>
  <node id="44661" label="ENSMUSG00000011148" cy:nodeId="2121">
    <graphics y="10.935056686401367" x="265.9735107421875" z="0.0">
      <att name="lockedVisualProperties" type="list" cy:type="List">
        <att name="NODE_LABEL_COLOR" value="#FFFFFF" type="string" cy:type="String"/>
      </att>
    </graphics>
  </node>
  <node id="44662" label="ENSMUSG00000027490" cy:nodeId="2186">
    <graphics y="87.4092788696289" x="181.15872192382812" z="0.0">
      <att name="lockedVisualProperties" type="list" cy:type="List">
        <att name="NODE_LABEL_COLOR" value="#FFFFFF" type="string" cy:type="String"/>
      </att>
    </graphics>
  </node>
  <node id="44663" label="ENSMUSG00000044066" cy:nodeId="1804">
    <graphics y="202.0382843017578" x="258.6510009765625" z="0.0">
      <att name="lockedVisualProperties" type="list" cy:type="List">
        <att name="NODE_LABEL_COLOR" value="#FFFFFF" type="string" cy:type="String"/>
      </att>
    </graphics>
  </node>
  <node id="44664" label="ENSMUSG00000018899" cy:nodeId="2190">
    <graphics y="128.28732299804688" x="184.66441345214844" z="0.0">
      <att name="lockedVisualProperties" type="list" cy:type="List">
        <att name="NODE_LABEL_COLOR" value="#FFFFFF" type="string" cy:type="String"/>
      </att>
    </graphics>
  </node>
  <node id="44665" label="ENSMUSG00000043439" cy:nodeId="1806">
    <graphics y="127.81929016113281" x="59.02985382080078" z="0.0">
      <att name="lockedVisualProperties" type="list" cy:type="List">
        <att name="NODE_LABEL_COLOR" value="#FFFFFF" type="string" cy:type="String"/>
      </att>
    </graphics>
  </node>
</graph>
