# Supplementary material for: Regulatory network analysis of Paneth cell and goblet cell enriched gut organoids using transcriptomics approaches
Source: Royal Society of Chemistry journal article supplement (doi:10.1039/c9mo00130a), 2019-12-10
Supplement: c9mo00130a2.cys [file c9mo00130a2.cys › CytoscapeSession-2019_09_26-21_57/views/21401-45914-1%3A+Cluster+4+%28Score%3A+3.714%29.xgmml]

<?xml version="1.0" encoding="UTF-8" standalone="yes"?>
<graph id="45914" label="45914" cy:view="1" cy:networkId="21401" cy:visualStyle="default" cy:rendererId="org.cytoscape.ding" cy:documentVersion="3.0" xmlns:dc="http://purl.org/dc/elements/1.1/" xmlns:xlink="http://www.w3.org/1999/xlink" xmlns:rdf="http://www.w3.org/1999/02/22-rdf-syntax-ns#" xmlns:cy="http://www.cytoscape.org" xmlns="http://www.cs.rpi.edu/XGMML">
  <graphics>
    <att name="NETWORK_CENTER_Z_LOCATION" value="0.0" type="string" cy:type="String"/>
    <att name="NETWORK_WIDTH" value="658.0" type="string" cy:type="String"/>
    <att name="NETWORK_HEIGHT" value="510.0" type="string" cy:type="String"/>
    <att name="NETWORK_DEPTH" value="0.0" type="string" cy:type="String"/>
    <att name="NETWORK_CENTER_X_LOCATION" value="48.37408447265625" type="string" cy:type="String"/>
    <att name="NETWORK_TITLE" value="" type="string" cy:type="String"/>
    <att name="NETWORK_SCALE_FACTOR" value="1.3616817146395501" type="string" cy:type="String"/>
    <att name="NETWORK_EDGE_SELECTION" value="true" type="string" cy:type="String"/>
    <att name="NETWORK_ANNOTATION_SELECTION" value="false" type="string" cy:type="String"/>
    <att name="NETWORK_CENTER_Y_LOCATION" value="15.264305114746094" type="string" cy:type="String"/>
    <att name="NETWORK_NODE_SELECTION" value="true" type="string" cy:type="String"/>
  </graphics>
  <node id="45924" label="ENSMUSG00000020581" cy:nodeId="1327">
    <graphics y="-150.75875854492188" x="63.28871154785156" z="0.0"/>
  </node>
  <node id="45925" label="ENSMUSG00000027750" cy:nodeId="1297">
    <graphics y="-139.61672973632812" x="-16.780933380126953" z="0.0"/>
  </node>
  <node id="45926" label="ENSMUSG00000066324" cy:nodeId="1201">
    <graphics y="-90.50192318766494" x="-82.05085824745038" z="0.0"/>
  </node>
  <node id="45927" label="ENSMUSG00000026072" cy:nodeId="1305">
    <graphics y="87.9440006233599" x="197.18486022328216" z="0.0"/>
  </node>
  <node id="45928" label="ENSMUSG00000036181" cy:nodeId="1881">
    <graphics y="-18.85572052001953" x="-116.01948547363281" z="0.0"/>
  </node>
  <node id="45929" label="ENSMUSG00000044288" cy:nodeId="1371">
    <graphics y="181.2873630042268" x="71.12577253743802" z="0.0"/>
  </node>
  <node id="45930" label="ENSMUSG00000047115" cy:nodeId="1788">
    <graphics y="173.11678726362152" x="-9.50635638795211" z="0.0"/>
  </node>
  <node id="45916" label="ENSMUSG00000042041" cy:nodeId="702">
    <graphics y="128.46026611328125" x="-75.3371810913086" z="0.0"/>
  </node>
  <node id="45917" label="ENSMUSG00000050064" cy:nodeId="1217">
    <graphics y="150.14489464535654" x="146.45678972812675" z="0.0"/>
  </node>
  <node id="45918" label="ENSMUSG00000055978" cy:nodeId="583">
    <graphics y="-65.46577453613281" x="192.25442504882812" z="0.0"/>
  </node>
  <node id="45919" label="ENSMUSG00000021720" cy:nodeId="1321">
    <graphics y="59.71691233313322" x="-113.44966667449262" z="0.0"/>
  </node>
  <node id="45920" label="ENSMUSG00000035451" cy:nodeId="1129">
    <graphics y="36.24739877803586" x="52.474179917629954" z="0.0"/>
  </node>
  <node id="45921" label="ENSMUSG00000020573" cy:nodeId="2091">
    <graphics y="-123.44324656980098" x="138.92585526472612" z="0.0"/>
  </node>
  <node id="45922" label="ENSMUSG00000038692" cy:nodeId="747">
    <graphics y="-5.090484064290649" x="41.133639943967864" z="0.0"/>
  </node>
  <node id="45923" label="ENSMUSG00000020261" cy:nodeId="2094">
    <graphics y="10.651946628935548" x="212.76765820504806" z="0.0"/>
  </node>
</graph>
