# Supplementary material for: Regulatory network analysis of Paneth cell and goblet cell enriched gut organoids using transcriptomics approaches
Source: Royal Society of Chemistry journal article supplement (doi:10.1039/c9mo00130a), 2019-12-10
Supplement: c9mo00130a2.cys [file c9mo00130a2.cys › CytoscapeSession-2019_09_26-21_57/views/21411-44632-1%3A+Cluster+5+%28Score%3A+3.333%29.xgmml]

<?xml version="1.0" encoding="UTF-8" standalone="yes"?>
<graph id="44632" label="44632" cy:view="1" cy:networkId="21411" cy:visualStyle="default" cy:rendererId="org.cytoscape.ding" cy:documentVersion="3.0" xmlns:dc="http://purl.org/dc/elements/1.1/" xmlns:xlink="http://www.w3.org/1999/xlink" xmlns:rdf="http://www.w3.org/1999/02/22-rdf-syntax-ns#" xmlns:cy="http://www.cytoscape.org" xmlns="http://www.cs.rpi.edu/XGMML">
  <graphics>
    <att name="NETWORK_CENTER_Z_LOCATION" value="0.0" type="string" cy:type="String"/>
    <att name="NETWORK_WIDTH" value="658.0" type="string" cy:type="String"/>
    <att name="NETWORK_HEIGHT" value="510.0" type="string" cy:type="String"/>
    <att name="NETWORK_DEPTH" value="0.0" type="string" cy:type="String"/>
    <att name="NETWORK_CENTER_X_LOCATION" value="-113.97204399108887" type="string" cy:type="String"/>
    <att name="NETWORK_TITLE" value="" type="string" cy:type="String"/>
    <att name="NETWORK_SCALE_FACTOR" value="1.9935606229131981" type="string" cy:type="String"/>
    <att name="NETWORK_EDGE_SELECTION" value="true" type="string" cy:type="String"/>
    <att name="NETWORK_ANNOTATION_SELECTION" value="false" type="string" cy:type="String"/>
    <att name="NETWORK_CENTER_Y_LOCATION" value="-2.6804275512695312" type="string" cy:type="String"/>
    <att name="NETWORK_NODE_SELECTION" value="true" type="string" cy:type="String"/>
  </graphics>
  <node id="44634" label="ENSMUSG00000048450" cy:nodeId="1775">
    <graphics y="-110.53402709960938" x="-55.75480651855469" z="0.0"/>
  </node>
  <node id="44635" label="ENSMUSG00000027434" cy:nodeId="304">
    <graphics y="-23.367904663085938" x="-134.45683880753728" z="0.0"/>
  </node>
  <node id="44639" label="ENSMUSG00000047221" cy:nodeId="1786">
    <graphics y="13.882415771484375" x="-2.2507896423339844" z="0.0">
      <att name="lockedVisualProperties" type="list" cy:type="List">
        <att name="NODE_LABEL_FONT_SIZE" value="5" type="string" cy:type="String"/>
      </att>
    </graphics>
  </node>
  <node id="44636" label="ENSMUSG00000020873" cy:nodeId="2082">
    <graphics y="35.40595245361328" x="-225.69329833984375" z="0.0"/>
  </node>
  <node id="44637" label="ENSMUSG00000001403" cy:nodeId="2148">
    <graphics y="105.17317199707031" x="-114.08192443847656" z="0.0"/>
  </node>
  <node id="44638" label="ENSMUSG00000000782" cy:nodeId="2153">
    <graphics y="0.5401458740234375" x="-100.7471923828125" z="0.0"/>
  </node>
  <node id="44640" label="ENSMUSG00000031617" cy:nodeId="1930">
    <graphics y="-104.17082214355469" x="-191.79293823242188" z="0.0"/>
  </node>
</graph>
