# Supplementary material for: Regulatory network analysis of Paneth cell and goblet cell enriched gut organoids using transcriptomics approaches
Source: Royal Society of Chemistry journal article supplement (doi:10.1039/c9mo00130a), 2019-12-10
Supplement: c9mo00130a2.cys [file c9mo00130a2.cys › CytoscapeSession-2019_09_26-21_57/views/21421-44758-1%3A+Cluster+6+%28Score%3A+2.667%29.xgmml]

<?xml version="1.0" encoding="UTF-8" standalone="yes"?>
<graph id="44758" label="44758" cy:view="1" cy:networkId="21421" cy:visualStyle="default" cy:rendererId="org.cytoscape.ding" cy:documentVersion="3.0" xmlns:dc="http://purl.org/dc/elements/1.1/" xmlns:xlink="http://www.w3.org/1999/xlink" xmlns:rdf="http://www.w3.org/1999/02/22-rdf-syntax-ns#" xmlns:cy="http://www.cytoscape.org" xmlns="http://www.cs.rpi.edu/XGMML">
  <graphics>
    <att name="NETWORK_CENTER_Z_LOCATION" value="0.0" type="string" cy:type="String"/>
    <att name="NETWORK_WIDTH" value="658.0" type="string" cy:type="String"/>
    <att name="NETWORK_HEIGHT" value="510.0" type="string" cy:type="String"/>
    <att name="NETWORK_DEPTH" value="0.0" type="string" cy:type="String"/>
    <att name="NETWORK_CENTER_X_LOCATION" value="105.81625747680664" type="string" cy:type="String"/>
    <att name="NETWORK_TITLE" value="" type="string" cy:type="String"/>
    <att name="NETWORK_SCALE_FACTOR" value="3.7498570745111803" type="string" cy:type="String"/>
    <att name="NETWORK_EDGE_SELECTION" value="true" type="string" cy:type="String"/>
    <att name="NETWORK_ANNOTATION_SELECTION" value="false" type="string" cy:type="String"/>
    <att name="NETWORK_CENTER_Y_LOCATION" value="72.01297760009766" type="string" cy:type="String"/>
    <att name="NETWORK_NODE_SELECTION" value="true" type="string" cy:type="String"/>
  </graphics>
  <node id="44761" label="ENSMUSG00000046546" cy:nodeId="1593">
    <graphics y="121.155517578125" x="151.30979919433594" z="0.0">
      <att name="lockedVisualProperties" type="list" cy:type="List">
        <att name="NODE_LABEL_FONT_SIZE" value="6" type="string" cy:type="String"/>
      </att>
    </graphics>
  </node>
  <node id="44763" label="ENSMUSG00000042258" cy:nodeId="1372">
    <graphics y="26.824569702148438" x="153.92860412597656" z="0.0">
      <att name="lockedVisualProperties" type="list" cy:type="List">
        <att name="NODE_LABEL_FONT_SIZE" value="6" type="string" cy:type="String"/>
      </att>
    </graphics>
  </node>
  <node id="44760" label="ENSMUSG00000046668" cy:nodeId="1792">
    <graphics y="115.95120239257812" x="57.70391082763672" z="0.0">
      <att name="lockedVisualProperties" type="list" cy:type="List">
        <att name="NODE_LABEL_FONT_SIZE" value="6" type="string" cy:type="String"/>
      </att>
    </graphics>
  </node>
  <node id="44762" label="ENSMUSG00000073043" cy:nodeId="1131">
    <graphics y="22.870437622070312" x="59.26422119140625" z="0.0">
      <att name="lockedVisualProperties" type="list" cy:type="List">
        <att name="NODE_LABEL_FONT_SIZE" value="6" type="string" cy:type="String"/>
      </att>
    </graphics>
  </node>
</graph>
