# Supplementary material for: Regulatory network analysis of Paneth cell and goblet cell enriched gut organoids using transcriptomics approaches
Source: Royal Society of Chemistry journal article supplement (doi:10.1039/c9mo00130a), 2019-12-10
Supplement: c9mo00130a2.cys [file c9mo00130a2.cys › CytoscapeSession-2019_09_26-21_57/views/21431-45904-1%3A+Cluster+7+%28Score%3A+2.667%29.xgmml]

<?xml version="1.0" encoding="UTF-8" standalone="yes"?>
<graph id="45904" label="45904" cy:view="1" cy:networkId="21431" cy:visualStyle="default" cy:rendererId="org.cytoscape.ding" cy:documentVersion="3.0" xmlns:dc="http://purl.org/dc/elements/1.1/" xmlns:xlink="http://www.w3.org/1999/xlink" xmlns:rdf="http://www.w3.org/1999/02/22-rdf-syntax-ns#" xmlns:cy="http://www.cytoscape.org" xmlns="http://www.cs.rpi.edu/XGMML">
  <graphics>
    <att name="NETWORK_CENTER_Z_LOCATION" value="0.0" type="string" cy:type="String"/>
    <att name="NETWORK_WIDTH" value="658.0" type="string" cy:type="String"/>
    <att name="NETWORK_HEIGHT" value="510.0" type="string" cy:type="String"/>
    <att name="NETWORK_DEPTH" value="0.0" type="string" cy:type="String"/>
    <att name="NETWORK_CENTER_X_LOCATION" value="188.4637647051008" type="string" cy:type="String"/>
    <att name="NETWORK_TITLE" value="" type="string" cy:type="String"/>
    <att name="NETWORK_SCALE_FACTOR" value="3.1225140386088137" type="string" cy:type="String"/>
    <att name="NETWORK_EDGE_SELECTION" value="true" type="string" cy:type="String"/>
    <att name="NETWORK_ANNOTATION_SELECTION" value="false" type="string" cy:type="String"/>
    <att name="NETWORK_CENTER_Y_LOCATION" value="117.61440658569336" type="string" cy:type="String"/>
    <att name="NETWORK_NODE_SELECTION" value="true" type="string" cy:type="String"/>
  </graphics>
  <node id="45908" label="mmu-miR-7a-5p" cy:nodeId="210">
    <graphics y="180.1460723876953" x="197.71670532226562" z="0.0">
      <att name="lockedVisualProperties" type="list" cy:type="List">
        <att name="NODE_LABEL_FONT_SIZE" value="5" type="string" cy:type="String"/>
      </att>
    </graphics>
  </node>
  <node id="45906" label="ENSMUSG00000040118" cy:nodeId="735">
    <graphics y="123.56443786621094" x="250.82147216796875" z="0.0">
      <att name="lockedVisualProperties" type="list" cy:type="List">
        <att name="NODE_LABEL_FONT_SIZE" value="5" type="string" cy:type="String"/>
      </att>
    </graphics>
  </node>
  <node id="45907" label="ENSMUSG00000026335" cy:nodeId="1641">
    <graphics y="55.082740783691406" x="186.181396484375" z="0.0">
      <att name="lockedVisualProperties" type="list" cy:type="List">
        <att name="NODE_LABEL_FONT_SIZE" value="5" type="string" cy:type="String"/>
      </att>
    </graphics>
  </node>
  <node id="45909" label="mmu-miR-101a-3p" cy:nodeId="203">
    <graphics y="104.97332000732422" x="126.74656677246094" z="0.0">
      <att name="lockedVisualProperties" type="list" cy:type="List">
        <att name="NODE_LABEL_FONT_SIZE" value="5" type="string" cy:type="String"/>
      </att>
    </graphics>
  </node>
</graph>
