# Supplementary figures and images for: Regulatory network analysis of Paneth cell and goblet cell enriched gut organoids using transcriptomics approaches
Source: Royal Society of Chemistry journal article supplement (doi:10.1039/c9mo00130a), 2019-12-10

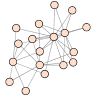

Supplement: c9mo00130a1.cys [file c9mo00130a1.cys › CytoscapeSession-2019_09_26-22_01/session_thumbnail.png]

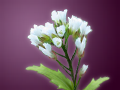

Supplement: c9mo00130a1.cys [file c9mo00130a1.cys › CytoscapeSession-2019_09_26-22_01/apps/org.cytoscape.ding.customgraphicsmgr/8.png]

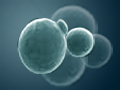

Supplement: c9mo00130a1.cys [file c9mo00130a1.cys › CytoscapeSession-2019_09_26-22_01/apps/org.cytoscape.ding.customgraphicsmgr/9.png]

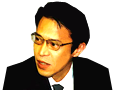

Supplement: c9mo00130a1.cys [file c9mo00130a1.cys › CytoscapeSession-2019_09_26-22_01/apps/org.cytoscape.ding.customgraphicsmgr/14.png]

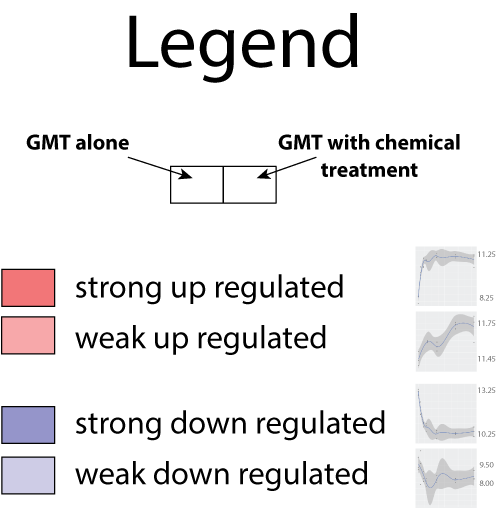

Supplement: c9mo00130a1.cys [file c9mo00130a1.cys › CytoscapeSession-2019_09_26-22_01/apps/org.cytoscape.ding.customgraphicsmgr/28.png]

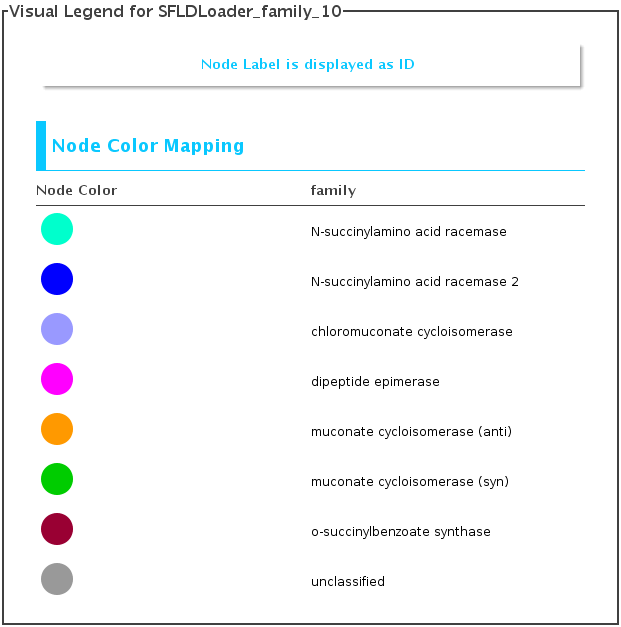

Supplement: c9mo00130a1.cys [file c9mo00130a1.cys › CytoscapeSession-2019_09_26-22_01/apps/org.cytoscape.ding.customgraphicsmgr/29.png]

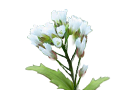

Supplement: c9mo00130a1.cys [file c9mo00130a1.cys › CytoscapeSession-2019_09_26-22_01/apps/org.cytoscape.ding.customgraphicsmgr/15.png]

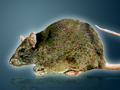

Supplement: c9mo00130a1.cys [file c9mo00130a1.cys › CytoscapeSession-2019_09_26-22_01/apps/org.cytoscape.ding.customgraphicsmgr/17.png]

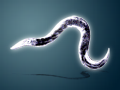

Supplement: c9mo00130a1.cys [file c9mo00130a1.cys › CytoscapeSession-2019_09_26-22_01/apps/org.cytoscape.ding.customgraphicsmgr/16.png]

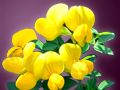

Supplement: c9mo00130a1.cys [file c9mo00130a1.cys › CytoscapeSession-2019_09_26-22_01/apps/org.cytoscape.ding.customgraphicsmgr/12.png]

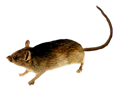

Supplement: c9mo00130a1.cys [file c9mo00130a1.cys › CytoscapeSession-2019_09_26-22_01/apps/org.cytoscape.ding.customgraphicsmgr/13.png]

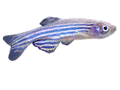

Supplement: c9mo00130a1.cys [file c9mo00130a1.cys › CytoscapeSession-2019_09_26-22_01/apps/org.cytoscape.ding.customgraphicsmgr/11.png]

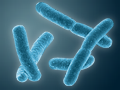

Supplement: c9mo00130a1.cys [file c9mo00130a1.cys › CytoscapeSession-2019_09_26-22_01/apps/org.cytoscape.ding.customgraphicsmgr/10.png]

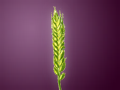

Supplement: c9mo00130a1.cys [file c9mo00130a1.cys › CytoscapeSession-2019_09_26-22_01/apps/org.cytoscape.ding.customgraphicsmgr/21.png]

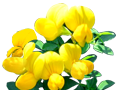

Supplement: c9mo00130a1.cys [file c9mo00130a1.cys › CytoscapeSession-2019_09_26-22_01/apps/org.cytoscape.ding.customgraphicsmgr/20.png]

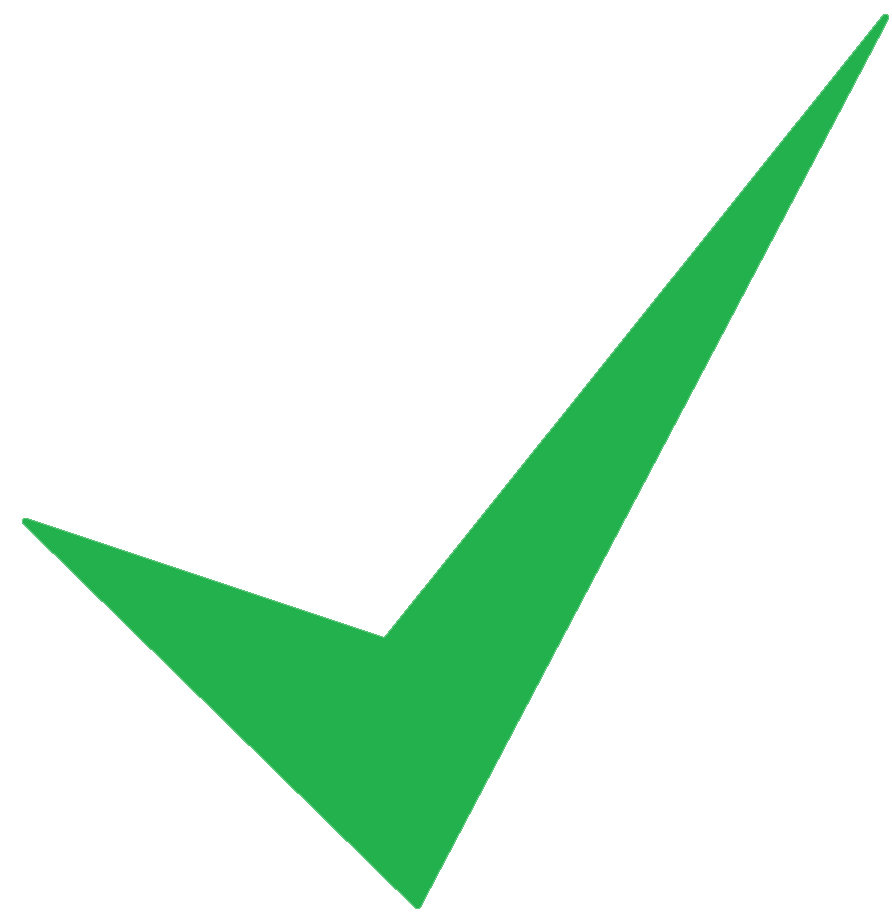

Supplement: c9mo00130a1.cys [file c9mo00130a1.cys › CytoscapeSession-2019_09_26-22_01/apps/org.cytoscape.ding.customgraphicsmgr/34.png]

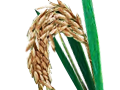

Supplement: c9mo00130a1.cys [file c9mo00130a1.cys › CytoscapeSession-2019_09_26-22_01/apps/org.cytoscape.ding.customgraphicsmgr/22.png]

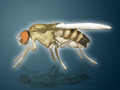

Supplement: c9mo00130a1.cys [file c9mo00130a1.cys › CytoscapeSession-2019_09_26-22_01/apps/org.cytoscape.ding.customgraphicsmgr/23.png]

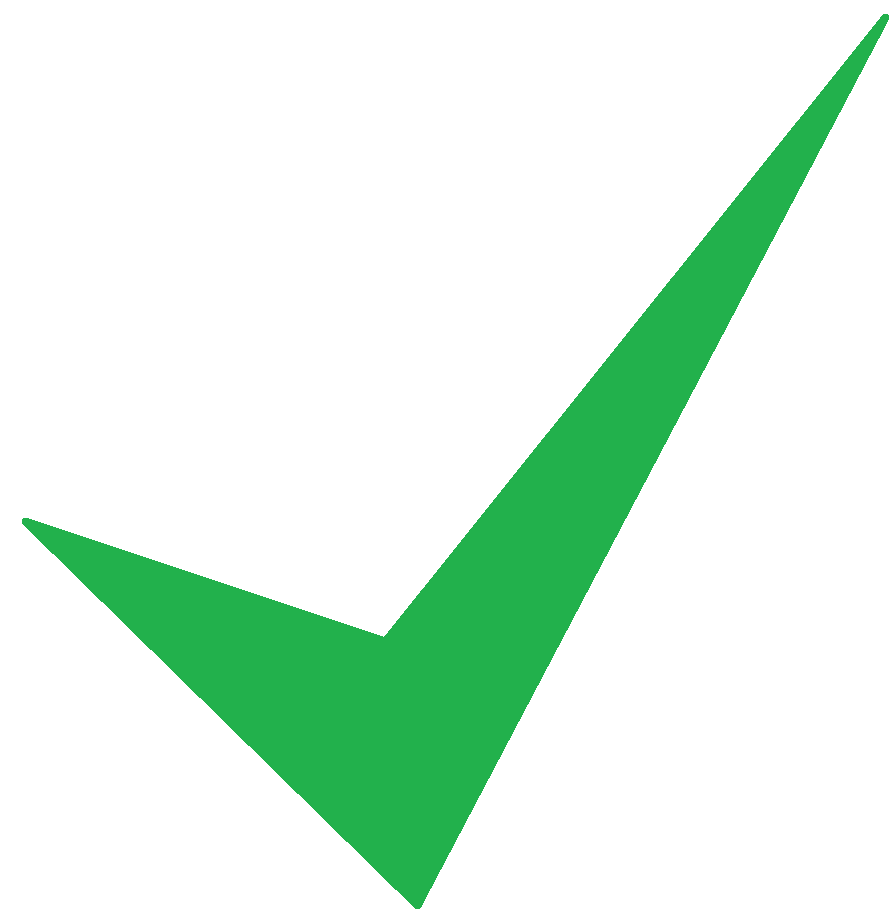

Supplement: c9mo00130a1.cys [file c9mo00130a1.cys › CytoscapeSession-2019_09_26-22_01/apps/org.cytoscape.ding.customgraphicsmgr/33.png]

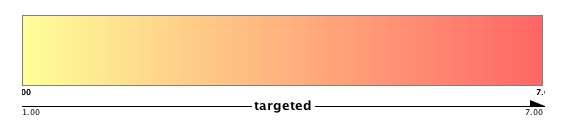

Supplement: c9mo00130a1.cys [file c9mo00130a1.cys › CytoscapeSession-2019_09_26-22_01/apps/org.cytoscape.ding.customgraphicsmgr/32.png]

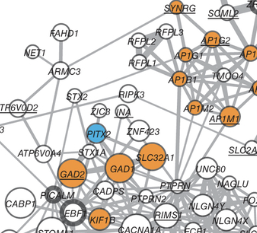

Supplement: c9mo00130a1.cys [file c9mo00130a1.cys › CytoscapeSession-2019_09_26-22_01/apps/org.cytoscape.ding.customgraphicsmgr/26.png]

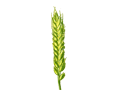

Supplement: c9mo00130a1.cys [file c9mo00130a1.cys › CytoscapeSession-2019_09_26-22_01/apps/org.cytoscape.ding.customgraphicsmgr/18.png]

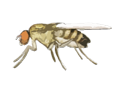

Supplement: c9mo00130a1.cys [file c9mo00130a1.cys › CytoscapeSession-2019_09_26-22_01/apps/org.cytoscape.ding.customgraphicsmgr/24.png]

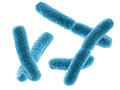

Supplement: c9mo00130a1.cys [file c9mo00130a1.cys › CytoscapeSession-2019_09_26-22_01/apps/org.cytoscape.ding.customgraphicsmgr/19.png]

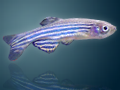

Supplement: c9mo00130a1.cys [file c9mo00130a1.cys › CytoscapeSession-2019_09_26-22_01/apps/org.cytoscape.ding.customgraphicsmgr/4.png]

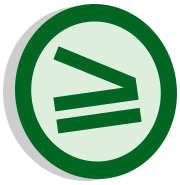

Supplement: c9mo00130a1.cys [file c9mo00130a1.cys › CytoscapeSession-2019_09_26-22_01/apps/org.cytoscape.ding.customgraphicsmgr/42.png]

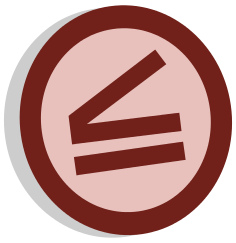

Supplement: c9mo00130a1.cys [file c9mo00130a1.cys › CytoscapeSession-2019_09_26-22_01/apps/org.cytoscape.ding.customgraphicsmgr/43.png]

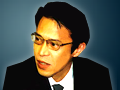

Supplement: c9mo00130a1.cys [file c9mo00130a1.cys › CytoscapeSession-2019_09_26-22_01/apps/org.cytoscape.ding.customgraphicsmgr/5.png]

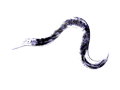

Supplement: c9mo00130a1.cys [file c9mo00130a1.cys › CytoscapeSession-2019_09_26-22_01/apps/org.cytoscape.ding.customgraphicsmgr/7.png]

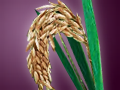

Supplement: c9mo00130a1.cys [file c9mo00130a1.cys › CytoscapeSession-2019_09_26-22_01/apps/org.cytoscape.ding.customgraphicsmgr/6.png]

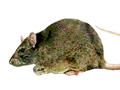

Supplement: c9mo00130a1.cys [file c9mo00130a1.cys › CytoscapeSession-2019_09_26-22_01/apps/org.cytoscape.ding.customgraphicsmgr/2.png]

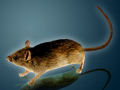

Supplement: c9mo00130a1.cys [file c9mo00130a1.cys › CytoscapeSession-2019_09_26-22_01/apps/org.cytoscape.ding.customgraphicsmgr/3.png]

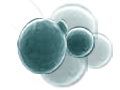

Supplement: c9mo00130a1.cys [file c9mo00130a1.cys › CytoscapeSession-2019_09_26-22_01/apps/org.cytoscape.ding.customgraphicsmgr/1.png]

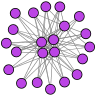

Supplement: c9mo00130a2.cys [file c9mo00130a2.cys › CytoscapeSession-2019_09_26-21_57/session_thumbnail.png]
